# Supplementary material for: Colchicine effects on the gut microbiome in adults with metabolic syndrome
Source: PubMed Central journal article supplement — Biosci Microbiota Food Health. 2023 May 1;42(4):236–42. doi: 10.12938/bmfh.2023-001 (PMC10542426; doi:10.12938/bmfh.2023-001), 2023-05-01
Supplement: bmfh-42-236-s001.pdf [file bmfh-42-236-s001.pdf]

## Supplementary Table 1

|                             | Provided Stool (N= 27) | Non-Providing (N=13) | p - value |
|-----------------------------|------------------------|----------------------|-----------|
| Age (years)                 | 48.9 ± 12.3            | 39.7 ± 8.2           | p = 0.01  |
| Sex (n, %)                  |                        |                      | p = 0.39  |
| - Male                      | 5 (18.5%)              | 4 (30.8%)            |           |
| - Female                    | 22 (81.5%)             | 9 (69.2%)            |           |
| Race (n, %)                 |                        |                      | p = 0.37  |
| - White                     | 12 (44.4%)             | 3 (23.1%)            |           |
| - Black                     | 6 (22.2%)              | 5 (38.5%)            |           |
| - Multiracial/Unknown/Other | 9 (33.3%)              | 5 (38.5%)            |           |
| BMI (kg/m <sup>2</sup> )    | 38.7 ± 6.6             | 47.9 ± 10.0          | p < 0.001 |
| hsCRP (mg/L)                | 7.2 ± 6.8              | 7.7 ± 4.5            | p = 0.42  |
| HOMA-IR                     | 6.0 ± 2.6              | 7.4 ± 3.5            | p = 0.09  |
| Fat Mass (%)                | 48.1 ± 4.7             | 50.7 ± 5.6           | p = 0.07  |

Sociodemographic variables between included participants (provided stool) and excluded participants (non-providing) at baseline.

Values presented in M±SD format except where otherwise noted

BMI: Body Mass Index; hsCRP: high-sensitivity C-Reactive Protein; HOMA-IR: homeostatic model assessment of insulin resistance

Continuous variables were analyzed using the unpaired Student's t-test, while categorical variables were analyzed using a chi-square test.

Supplementary Table 2

Statistical Analyses - test selection

| <b>Statistical Analysis</b>                   |                              |                    |
|-----------------------------------------------|------------------------------|--------------------|
| <b>Changes in Inflammatory Marker analyte</b> | <b>Statistical Test Used</b> | <b>Description</b> |
| hsCRP                                         | Unpaired Student's t-test    | Windsorized        |
| IL-6                                          | Unpaired Student's t-test    | Windsorized        |
| Neutrophils                                   | Unpaired Student's t-test    | Windsorized        |
| GlycA                                         | Unpaired Student's t-test    | Delta              |
| Resistin                                      | Unpaired Student's t-test    | Delta              |
| WBC                                           | Unpaired Student's t-test    | Delta              |
| <b>Changes in alpha-diversity indices</b>     | <b>Statistical Test Used</b> |                    |
| Chao1                                         | Unpaired Student's t-test    | Delta              |
| Shannon                                       | Unpaired Student's t-test    | Windsorized        |
| Pielou                                        | Unpaired Student's t-test    | Delta              |
| <b>Microbial Variable</b>                     | <b>Statistical Test Used</b> |                    |
| Actinobacteria                                | Students t-test              |                    |
| Actinomyces                                   | Mann Whitney U test          |                    |
| Adlercreutzia                                 | Mann Whitney U test          |                    |
| Alloscardovia                                 | Mann Whitney U test          |                    |
| Atopobium                                     | Mann Whitney U test          |                    |
| Bifidobacterium                               | Mann Whitney U test          |                    |
| Collinsella                                   | Mann Whitney U test          |                    |
| Corynebacterium                               | Mann Whitney U test          |                    |
| Corynebacterium_1                             | Mann Whitney U test          |                    |
| DNF00809                                      | Mann Whitney U test          |                    |
| Eggerthella                                   | Mann Whitney U test          |                    |
| Enterorhabdus                                 | Mann Whitney U test          |                    |
| F0332                                         | Mann Whitney U test          |                    |
| Gardnerella                                   | Mann Whitney U test          |                    |
| Gordonibacter                                 | Mann Whitney U test          |                    |
| Lawsonella                                    | Mann Whitney U test          |                    |
| Libanicoccus                                  | Mann Whitney U test          |                    |
| Mobiluncus                                    | Mann Whitney U test          |                    |
| Olsenella                                     | Mann Whitney U test          |                    |
| Parvibacter                                   | Mann Whitney U test          |                    |
| Propionibacterium                             | Mann Whitney U test          |                    |
| Raoultibacter                                 | Mann Whitney U test          |                    |
| Rothia                                        | Mann Whitney U test          |                    |
| Senegalimassilia                              | Mann Whitney U test          |                    |
| Slackia                                       | Mann Whitney U test          |                    |
| (blank)                                       | Mann Whitney U test          |                    |
| Bacteroidetes                                 | Students t-test              |                    |
| Alistipes                                     | Students t-test              |                    |
| Alloprevotella                                | Mann Whitney U test          |                    |
| Bacteroides                                   | Students t-test              |                    |
| Barnesiella                                   | Mann Whitney U test          |                    |
| Butyrivimonas                                 | Mann Whitney U test          |                    |
| Cloacibacterium                               | Mann Whitney U test          |                    |
| Coprobacter                                   | Mann Whitney U test          |                    |
| Odoribacter                                   | Students t-test              |                    |
| Parabacteroides                               | Mann Whitney U test          |                    |

Statistical Analyses - test selection

| Changes in Inflammatory Marker analyte | Statistical Test Used | Description |
|----------------------------------------|-----------------------|-------------|
| Paraprevotella                         | Mann Whitney U test   |             |
| Porphyromonas                          | Mann Whitney U test   |             |
| Prevotella                             | Mann Whitney U test   |             |
| Prevotella_2                           | Mann Whitney U test   |             |
| Prevotella_6                           | Mann Whitney U test   |             |
| Prevotella_7                           | Mann Whitney U test   |             |
| Prevotella_9                           | Mann Whitney U test   |             |
| Prevotellaceae_UCG-003                 | Mann Whitney U test   |             |
| Rikenella                              | Mann Whitney U test   |             |
| Rikenellaceae_RC9_gut_group            | Mann Whitney U test   |             |
| Sanguibacteroides                      | Mann Whitney U test   |             |
| (blank)                                | Mann Whitney U test   |             |
| Cyanobacteria                          | Mann Whitney U test   |             |
| (blank)                                | Mann Whitney U test   |             |
| Epsilonbacteraeota                     | Mann Whitney U test   |             |
| Campylobacter                          | Mann Whitney U test   |             |
| Euryarchaeota                          | Mann Whitney U test   |             |
| Methanobrevibacter                     | Mann Whitney U test   |             |
| Methanomassiliicoccus                  | Mann Whitney U test   |             |
| Methanosphaera                         | Mann Whitney U test   |             |
| (blank)                                | Mann Whitney U test   |             |
| Firmicutes                             | Students t-test       |             |
| Acetanaerobacterium                    | Mann Whitney U test   |             |
| Acidaminococcus                        | Mann Whitney U test   |             |
| Agathobacter                           | Students t-test       |             |
| Allisonella                            | Mann Whitney U test   |             |
| Anaerococcus                           | Mann Whitney U test   |             |
| Anaerofilum                            | Mann Whitney U test   |             |
| Anaerofustis                           | Mann Whitney U test   |             |
| Anaerostipes                           | Students t-test       |             |
| Anaerotruncus                          | Mann Whitney U test   |             |
| Anaerovorax                            | Mann Whitney U test   |             |
| Angelakisella                          | Mann Whitney U test   |             |
| Blautia                                | Students t-test       |             |
| Butyricicoccus                         | Students t-test       |             |
| CAG-352                                | Mann Whitney U test   |             |
| CAG-56                                 | Mann Whitney U test   |             |
| Candidatus_Arthromitus                 | Mann Whitney U test   |             |
| Candidatus_Soleaferrea                 | Students t-test       |             |
| Candidatus_Stoquefichus                | Mann Whitney U test   |             |
| Caproiciproducens                      | Mann Whitney U test   |             |
| Catabacter                             | Mann Whitney U test   |             |
| Catenibacterium                        | Mann Whitney U test   |             |
| Christensenellaceae_R-7_group          | Mann Whitney U test   |             |
| Clostridioides                         | Mann Whitney U test   |             |
| Clostridium_sensu_stricto_1            | Mann Whitney U test   |             |
| Coprobacillus                          | Mann Whitney U test   |             |
| Coprococcus_1                          | Mann Whitney U test   |             |

Statistical Analyses - test selection

| <b>Changes in Inflammatory Marker analyte</b> | <b>Statistical Test Used</b> | <b>Description</b> |
|-----------------------------------------------|------------------------------|--------------------|
| Coprococcus_2                                 | Mann Whitney U test          |                    |
| Coprococcus_3                                 | Mann Whitney U test          |                    |
| Cuneatibacter                                 | Mann Whitney U test          |                    |
| Defluviitaleaceae_UCG-011                     | Mann Whitney U test          |                    |
| Dialister                                     | Mann Whitney U test          |                    |
| Dielma                                        | Mann Whitney U test          |                    |
| Dorea                                         | Mann Whitney U test          |                    |
| DTU089                                        | Mann Whitney U test          |                    |
| Eisenbergiella                                | Mann Whitney U test          |                    |
| Enterococcus                                  | Mann Whitney U test          |                    |
| Epulopiscium                                  | Mann Whitney U test          |                    |
| Erysipelatoclostridium                        | Mann Whitney U test          |                    |
| Erysipelotrichaceae_UCG-003                   | Mann Whitney U test          |                    |
| Erysipelotrichaceae_UCG-006                   | Mann Whitney U test          |                    |
| Eubacterium                                   | Mann Whitney U test          |                    |
| Ezakiella                                     | Mann Whitney U test          |                    |
| Faecalibacterium                              | Mann Whitney U test          |                    |
| Faecalitalea                                  | Mann Whitney U test          |                    |
| Family_XIII_AD3011_group                      | Mann Whitney U test          |                    |
| Family_XIII_UCG-001                           | Students t-test              |                    |
| Finegoldia                                    | Mann Whitney U test          |                    |
| Flavonifractor                                | Mann Whitney U test          |                    |
| Fournierella                                  | Mann Whitney U test          |                    |
| Fusicatenibacter                              | Mann Whitney U test          |                    |
| GCA-900066225                                 | Mann Whitney U test          |                    |
| GCA-900066575                                 | Students t-test              |                    |
| GCA-900066755                                 | Mann Whitney U test          |                    |
| Gemella                                       | Mann Whitney U test          |                    |
| Granulicatella                                | Mann Whitney U test          |                    |
| Harryflintia                                  | Mann Whitney U test          |                    |
| Holdemanella                                  | Mann Whitney U test          |                    |
| Holdemania                                    | Mann Whitney U test          |                    |
| Howardella                                    | Mann Whitney U test          |                    |
| Hungatella                                    | Mann Whitney U test          |                    |
| Hydrogenoanaerobacterium                      | Mann Whitney U test          |                    |
| Intestinibacter                               | Mann Whitney U test          |                    |
| Intestinimonas                                | Mann Whitney U test          |                    |
| Lachnoanaerobaculum                           | Mann Whitney U test          |                    |
| Lachnoclostridium                             | Students t-test              |                    |
| Lachnospira                                   | Mann Whitney U test          |                    |
| Lachnospiraceae_FCS020_group                  | Students t-test              |                    |
| Lachnospiraceae_ND3007_group                  | Students t-test              |                    |
| Lachnospiraceae_NK4A136_group                 | Mann Whitney U test          |                    |
| Lachnospiraceae_NK4B4_group                   | Mann Whitney U test          |                    |
| Lachnospiraceae_UCG-001                       | Mann Whitney U test          |                    |
| Lachnospiraceae_UCG-002                       | Mann Whitney U test          |                    |
| Lachnospiraceae_UCG-003                       | Mann Whitney U test          |                    |
| Lachnospiraceae_UCG-004                       | Mann Whitney U test          |                    |

Statistical Analyses - test selection

| <b>Changes in Inflammatory Marker analyte</b> | <b>Statistical Test Used</b> | <b>Description</b> |
|-----------------------------------------------|------------------------------|--------------------|
| Lachnospiraceae_UCG-008                       | Mann Whitney U test          |                    |
| Lachnospiraceae_UCG-010                       | Students t-test              |                    |
| Lactobacillus                                 | Mann Whitney U test          |                    |
| Lactococcus                                   | Mann Whitney U test          |                    |
| Leuconostoc                                   | Mann Whitney U test          |                    |
| Marvinbryantia                                | Mann Whitney U test          |                    |
| Megamonas                                     | Mann Whitney U test          |                    |
| Megasphaera                                   | Mann Whitney U test          |                    |
| Merdibacter                                   | Mann Whitney U test          |                    |
| Mitsuokella                                   | Mann Whitney U test          |                    |
| Mogibacterium                                 | Mann Whitney U test          |                    |
| Murdochiella                                  | Mann Whitney U test          |                    |
| Negativibacillus                              | Mann Whitney U test          |                    |
| Negativicoccus                                | Mann Whitney U test          |                    |
| Nosocomiicoccus                               | Mann Whitney U test          |                    |
| Oscillibacter                                 | Students t-test              |                    |
| Oscillospira                                  | Mann Whitney U test          |                    |
| Parvimonas                                    | Mann Whitney U test          |                    |
| Pediococcus                                   | Mann Whitney U test          |                    |
| Peptoclostridium                              | Mann Whitney U test          |                    |
| Peptococcus                                   | Mann Whitney U test          |                    |
| Peptoniphilus                                 | Mann Whitney U test          |                    |
| Peptostreptococcus                            | Mann Whitney U test          |                    |
| Phascolarctobacterium                         | Mann Whitney U test          |                    |
| Phocea                                        | Mann Whitney U test          |                    |
| Romboutsia                                    | Mann Whitney U test          |                    |
| Roseburia                                     | Mann Whitney U test          |                    |
| Ruminiclostridium                             | Mann Whitney U test          |                    |
| Ruminiclostridium_1                           | Mann Whitney U test          |                    |
| Ruminiclostridium_5                           | Mann Whitney U test          |                    |
| Ruminiclostridium_6                           | Mann Whitney U test          |                    |
| Ruminiclostridium_9                           | Mann Whitney U test          |                    |
| Ruminococcaceae_NK4A214_group                 | Mann Whitney U test          |                    |
| Ruminococcaceae_UCG-002                       | Students t-test              |                    |
| Ruminococcaceae_UCG-003                       | Mann Whitney U test          |                    |
| Ruminococcaceae_UCG-004                       | Students t-test              |                    |
| Ruminococcaceae_UCG-005                       | Mann Whitney U test          |                    |
| Ruminococcaceae_UCG-007                       | Mann Whitney U test          |                    |
| Ruminococcaceae_UCG-008                       | Mann Whitney U test          |                    |
| Ruminococcaceae_UCG-009                       | Mann Whitney U test          |                    |
| Ruminococcaceae_UCG-010                       | Mann Whitney U test          |                    |
| Ruminococcaceae_UCG-011                       | Mann Whitney U test          |                    |
| Ruminococcaceae_UCG-013                       | Students t-test              |                    |
| Ruminococcaceae_UCG-014                       | Mann Whitney U test          |                    |
| Ruminococcus_1                                | Students t-test              |                    |
| Ruminococcus_2                                | Mann Whitney U test          |                    |
| S5-A14a                                       | Mann Whitney U test          |                    |
| Sarcina                                       | Mann Whitney U test          |                    |

Statistical Analyses - test selection

| <b>Changes in Inflammatory Marker analyte</b> | <b>Statistical Test Used</b> | <b>Description</b> |
|-----------------------------------------------|------------------------------|--------------------|
| Sellimonas                                    | Mann Whitney U test          |                    |
| Shuttleworthia                                | Mann Whitney U test          |                    |
| Solobacterium                                 | Mann Whitney U test          |                    |
| Staphylococcus                                | Mann Whitney U test          |                    |
| Streptococcus                                 | Mann Whitney U test          |                    |
| Subdoligranulum                               | Mann Whitney U test          |                    |
| Succiniclasticum                              | Mann Whitney U test          |                    |
| Terrisporobacter                              | Mann Whitney U test          |                    |
| Turicibacter                                  | Mann Whitney U test          |                    |
| Tyzzereella                                   | Mann Whitney U test          |                    |
| Tyzzereella_3                                 | Mann Whitney U test          |                    |
| Tyzzereella_4                                 | Mann Whitney U test          |                    |
| UBA1819                                       | Mann Whitney U test          |                    |
| UC5-1-2E3                                     | Mann Whitney U test          |                    |
| Veillonella                                   | Students t-test              |                    |
| Weissella                                     | Mann Whitney U test          |                    |
| (blank)                                       | Mann Whitney U test          |                    |
| Fusobacteria                                  | Mann Whitney U test          |                    |
| Fusobacterium                                 | Mann Whitney U test          |                    |
| Sneathia                                      | Mann Whitney U test          |                    |
| Lentisphaerae                                 | Mann Whitney U test          |                    |
| Victivallis                                   | Mann Whitney U test          |                    |
| (blank)                                       | Mann Whitney U test          |                    |
| Patescibacteria                               | Mann Whitney U test          |                    |
| (blank)                                       | Mann Whitney U test          |                    |
| Proteobacteria                                | Students t-test              |                    |
| Bilophila                                     | Students t-test              |                    |
| Burkholderia-Caballeronia-Paraburkholderia    | Mann Whitney U test          |                    |
| Desulfovibrio                                 | Mann Whitney U test          |                    |
| Escherichia/Shigella                          | Mann Whitney U test          |                    |
| Haemophilus                                   | Mann Whitney U test          |                    |
| Oxalobacter                                   | Mann Whitney U test          |                    |
| Parasutterella                                | Mann Whitney U test          |                    |
| Pseudomonas                                   | Mann Whitney U test          |                    |
| Sutterella                                    | Mann Whitney U test          |                    |
| (blank)                                       | Mann Whitney U test          |                    |
| Spirochaetes                                  | Mann Whitney U test          |                    |
| (blank)                                       | Mann Whitney U test          |                    |
| Synergistetes                                 | Mann Whitney U test          |                    |
| Cloacibacillus                                | Mann Whitney U test          |                    |
| Pyramidobacter                                | Mann Whitney U test          |                    |
| Tenericutes                                   | Mann Whitney U test          |                    |
| (blank)                                       | Mann Whitney U test          |                    |
| Verrucomicrobia                               | Mann Whitney U test          |                    |
| Akkermansia                                   | Mann Whitney U test          |                    |
| Cerasicoccus                                  | Mann Whitney U test          |                    |
| (blank)                                       | Mann Whitney U test          |                    |
| (blank)                                       | Mann Whitney U test          |                    |

Statistical Analyses - test selection

| <b>Changes in Inflammatory Marker analyte</b>                       | <b>Statistical Test Used</b> | <b>Description</b> |
|---------------------------------------------------------------------|------------------------------|--------------------|
| (blank)                                                             | Mann Whitney U test          |                    |
| Grand Total                                                         | Students t-test              |                    |
| BacteroidetesDIVFirmicutes                                          | Mann Whitney U test          |                    |
| <b>changes in Oscillibacter vs. changes in inflammatory markers</b> | <b>Statistical Test Used</b> | <b>Description</b> |
| Oscillibacter vs. hsCRP                                             | Spearman's rank correlation  | Delta              |
| Oscillibacter vs. GlycA                                             | Spearman's rank correlation  | Delta              |
| Oscillibacter vs. IL-6                                              | Spearman's rank correlation  | Delta              |
| Oscillibacter vs. Resistin                                          | Spearman's rank correlation  | Delta              |
| Oscillibacter vs. Neutrophils                                       | Spearman's rank correlation  | Delta              |
| Oscillibacter vs. WBC                                               | Spearman's rank correlation  | Delta              |
| <b>Provided Stool vs Non-Providing</b>                              | <b>Statistical Test Used</b> | <b>Description</b> |
| Age                                                                 | Unpaired Student's t-test    | Baseline Data      |
| Sex                                                                 | chi-square test              | Baseline Data      |
| Race                                                                | chi-square test              | Baseline Data      |
| BMI                                                                 | Unpaired Student's t-test    | Baseline Data      |
| hsCRP                                                               | Unpaired Student's t-test    | Log Transformed    |
| HOMA-IR                                                             | Unpaired Student's t-test    | Baseline Data      |
| Fat Mass                                                            | Unpaired Student's t-test    | Baseline Data      |

Microbial Variables

| Microbial Variable Group | Kolmogorov-Smirnov <sup>a</sup> |       |      | Shapiro-Wilk |       |      | Statistical Test Used |                     |
|--------------------------|---------------------------------|-------|------|--------------|-------|------|-----------------------|---------------------|
|                          | Statistic                       | df    | Sig. | Statistic    | df    | Sig. |                       |                     |
| Actinobacteria           | 0                               | 0.186 | 12   | .200*        | 0.837 | 12   | 0.026                 | Students t-test     |
|                          | 1                               | 0.179 | 15   | .200*        | 0.905 | 15   | 0.114                 |                     |
| Actinomyces              | 0                               | 0.371 | 12   | 0.000        | 0.688 | 12   | 0.001                 | Mann Whitney U test |
|                          | 1                               | 0.148 | 15   | .200*        | 0.949 | 15   | 0.502                 |                     |
| Adlercreutzia            | 0                               | 0.303 | 12   | 0.003        | 0.832 | 12   | 0.022                 | Mann Whitney U test |
|                          | 1                               | 0.192 | 15   | 0.140        | 0.915 | 15   | 0.163                 |                     |
| Alloscardovia            | 0                               |       | 12   |              |       | 12   |                       | Mann Whitney U test |
|                          | 1                               |       | 15   |              |       | 15   |                       |                     |
| Atopobium                | 0                               | 0.530 | 12   | 0.000        | 0.327 | 12   | 0.000                 | Mann Whitney U test |
|                          | 1                               | 0.343 | 15   | 0.000        | 0.747 | 15   | 0.001                 |                     |
| Bifidobacterium          | 0                               | 0.312 | 12   | 0.002        | 0.687 | 12   | 0.001                 | Mann Whitney U test |
|                          | 1                               | 0.307 | 15   | 0.000        | 0.818 | 15   | 0.006                 |                     |
| Collinsella              | 0                               | 0.318 | 12   | 0.001        | 0.800 | 12   | 0.009                 | Mann Whitney U test |
|                          | 1                               | 0.168 | 15   | .200*        | 0.972 | 15   | 0.886                 |                     |
| Corynebacterium          | 0                               | 0.530 | 12   | 0.000        | 0.327 | 12   | 0.000                 | Mann Whitney U test |
|                          | 1                               |       | 15   |              |       | 15   |                       |                     |
| Corynebacterium_1        | 0                               |       | 12   |              |       | 12   |                       | Mann Whitney U test |
|                          | 1                               |       | 15   |              |       | 15   |                       |                     |
| DNF00809                 | 0                               | 0.494 | 12   | 0.000        | 0.505 | 12   | 0.000                 | Mann Whitney U test |
|                          | 1                               | 0.436 | 15   | 0.000        | 0.592 | 15   | 0.000                 |                     |
| Eggerthella              | 0                               | 0.412 | 12   | 0.000        | 0.514 | 12   | 0.000                 | Mann Whitney U test |
|                          | 1                               | 0.359 | 15   | 0.000        | 0.533 | 15   | 0.000                 |                     |
| Enterorhabdus            | 0                               | 0.466 | 12   | 0.000        | 0.399 | 12   | 0.000                 | Mann Whitney U test |
|                          | 1                               | 0.529 | 15   | 0.000        | 0.315 | 15   | 0.000                 |                     |
| F0332                    | 0                               | 0.530 | 12   | 0.000        | 0.327 | 12   | 0.000                 | Mann Whitney U test |
|                          | 1                               |       | 15   |              |       | 15   |                       |                     |
| Gardnerella              | 0                               | 0.438 | 12   | 0.000        | 0.679 | 12   | 0.001                 | Mann Whitney U test |
|                          | 1                               | 0.535 | 15   | 0.000        | 0.284 | 15   | 0.000                 |                     |
| Gordonibacter            | 0                               | 0.366 | 12   | 0.000        | 0.775 | 12   | 0.005                 | Mann Whitney U test |
|                          | 1                               | 0.292 | 15   | 0.001        | 0.826 | 15   | 0.008                 |                     |



Microbial Variables

| Microbial Variable Group | Kolmogorov-Smirnov <sup>a</sup> |    |       | Shapiro-Wilk |    |       | Statistical Test Used |
|--------------------------|---------------------------------|----|-------|--------------|----|-------|-----------------------|
|                          | Statistic                       | df | Sig.  | Statistic    | df | Sig.  |                       |
| Lawsonella 0             | 0.530                           | 12 | 0.000 | 0.327        | 12 | 0.000 | Mann Whitney U test   |
| 1                        | 0.474                           | 15 | 0.000 | 0.305        | 15 | 0.000 |                       |
| Libanicoccus 0           | 0.530                           | 12 | 0.000 | 0.327        | 12 | 0.000 | Mann Whitney U test   |
| 1                        |                                 | 15 |       |              | 15 |       |                       |
| Mobiluncus 0             | 0.530                           | 12 | 0.000 | 0.327        | 12 | 0.000 | Mann Whitney U test   |
| 1                        |                                 | 15 |       |              | 15 |       |                       |
| Olsenella 0              | 0.530                           | 12 | 0.000 | 0.327        | 12 | 0.000 | Mann Whitney U test   |
| 1                        | 0.535                           | 15 | 0.000 | 0.284        | 15 | 0.000 |                       |
| Parvibacter 0            |                                 | 12 |       |              | 12 |       | Mann Whitney U test   |
| 1                        | 0.535                           | 15 | 0.000 | 0.284        | 15 | 0.000 |                       |
| Propionibacterium 0      | 0.530                           | 12 | 0.000 | 0.327        | 12 | 0.000 | Mann Whitney U test   |
| 1                        |                                 | 15 |       |              | 15 |       |                       |
| Raoultibacter 0          | 0.402                           | 12 | 0.000 | 0.765        | 12 | 0.004 | Mann Whitney U test   |
| 1                        | 0.535                           | 15 | 0.000 | 0.284        | 15 | 0.000 |                       |
| Rothia 0                 | 0.478                           | 12 | 0.000 | 0.522        | 12 | 0.000 | Mann Whitney U test   |
| 1                        | 0.478                           | 15 | 0.000 | 0.484        | 15 | 0.000 |                       |
| Senegalimassilia 0       | 0.453                           | 12 | 0.000 | 0.640        | 12 | 0.000 | Mann Whitney U test   |
| 1                        | 0.420                           | 15 | 0.000 | 0.516        | 15 | 0.000 |                       |
| Slackia 0                | 0.377                           | 12 | 0.000 | 0.649        | 12 | 0.000 | Mann Whitney U test   |
| 1                        | 0.496                           | 15 | 0.000 | 0.441        | 15 | 0.000 |                       |
| (blank) 0                | 0.165                           | 12 | .200* | 0.937        | 12 | 0.456 | Mann Whitney U test   |
| 1                        | 0.335                           | 15 | 0.000 | 0.647        | 15 | 0.000 |                       |
| Bacteroidetes 0          | 0.169                           | 12 | .200* | 0.949        | 12 | 0.618 | Students t-test       |
| 1                        | 0.156                           | 15 | .200* | 0.941        | 15 | 0.396 |                       |
| Alistipes 0              | 0.134                           | 12 | .200* | 0.929        | 12 | 0.368 | Students t-test       |
| 1                        | 0.202                           | 15 | 0.103 | 0.922        | 15 | 0.204 |                       |
| Alloprevotella 0         | 0.521                           | 12 | 0.000 | 0.330        | 12 | 0.000 | Mann Whitney U test   |
| 1                        | 0.535                           | 15 | 0.000 | 0.284        | 15 | 0.000 |                       |
| Bacteroides 0            | 0.122                           | 12 | .200* | 0.977        | 12 | 0.968 | Students t-test       |
| 1                        | 0.145                           | 15 | .200* | 0.944        | 15 | 0.442 |                       |

Microbial Variables

| Microbial Variable Group      | Kolmogorov-Smirnov <sup>a</sup> |    |       | Shapiro-Wilk |    |       | Statistical Test Used |
|-------------------------------|---------------------------------|----|-------|--------------|----|-------|-----------------------|
|                               | Statistic                       | df | Sig.  | Statistic    | df | Sig.  |                       |
| Barnesiella 0                 | 0.424                           | 12 | 0.000 | 0.495        | 12 | 0.000 | Mann Whitney U test   |
| 1                             | 0.370                           | 15 | 0.000 | 0.647        | 15 | 0.000 |                       |
| Butyricimonas 0               | 0.321                           | 12 | 0.001 | 0.776        | 12 | 0.005 | Mann Whitney U test   |
| 1                             | 0.297                           | 15 | 0.001 | 0.768        | 15 | 0.001 |                       |
| Cloacibacterium 0             |                                 | 12 |       |              | 12 |       | Mann Whitney U test   |
| 1                             | 0.535                           | 15 | 0.000 | 0.284        | 15 | 0.000 |                       |
| Coprobacter 0                 | 0.477                           | 12 | 0.000 | 0.442        | 12 | 0.000 | Mann Whitney U test   |
| 1                             | 0.383                           | 15 | 0.000 | 0.741        | 15 | 0.001 |                       |
| Odoribacter 0                 | 0.223                           | 12 | 0.102 | 0.908        | 12 | 0.200 | Students t-test       |
| 1                             | 0.275                           | 15 | 0.003 | 0.886        | 15 | 0.058 |                       |
| Parabacteroides 0             | 0.260                           | 12 | 0.024 | 0.896        | 12 | 0.141 | Mann Whitney U test   |
| 1                             | 0.224                           | 15 | 0.042 | 0.865        | 15 | 0.029 |                       |
| Paraprevotella 0              | 0.424                           | 12 | 0.000 | 0.414        | 12 | 0.000 | Mann Whitney U test   |
| 1                             | 0.462                           | 15 | 0.000 | 0.543        | 15 | 0.000 |                       |
| Porphyromonas 0               | 0.489                           | 12 | 0.000 | 0.473        | 12 | 0.000 | Mann Whitney U test   |
| 1                             | 0.476                           | 15 | 0.000 | 0.312        | 15 | 0.000 |                       |
| Prevotella 0                  | 0.381                           | 12 | 0.000 | 0.680        | 12 | 0.001 | Mann Whitney U test   |
| 1                             | 0.433                           | 15 | 0.000 | 0.403        | 15 | 0.000 |                       |
| Prevotella_2 0                | 0.455                           | 12 | 0.000 | 0.503        | 12 | 0.000 | Mann Whitney U test   |
| 1                             |                                 | 15 |       |              | 15 |       |                       |
| Prevotella_6 0                | 0.530                           | 12 | 0.000 | 0.327        | 12 | 0.000 | Mann Whitney U test   |
| 1                             | 0.535                           | 15 | 0.000 | 0.284        | 15 | 0.000 |                       |
| Prevotella_7 0                | 0.427                           | 12 | 0.000 | 0.603        | 12 | 0.000 | Mann Whitney U test   |
| 1                             |                                 | 15 |       |              | 15 |       |                       |
| Prevotella_9 0                | 0.440                           | 12 | 0.000 | 0.371        | 12 | 0.000 | Mann Whitney U test   |
| 1                             | 0.529                           | 15 | 0.000 | 0.287        | 15 | 0.000 |                       |
| Prevotellaceae_UCG-003 0      | 0.530                           | 12 | 0.000 | 0.327        | 12 | 0.000 | Mann Whitney U test   |
| 1                             |                                 | 15 |       |              | 15 |       |                       |
| Rikenella 0                   | 0.530                           | 12 | 0.000 | 0.327        | 12 | 0.000 | Mann Whitney U test   |
| 1                             |                                 | 15 |       |              | 15 |       |                       |
| Rikenellaceae_RC9_gut_group 0 | 0.523                           | 12 | 0.000 | 0.361        | 12 | 0.000 | Mann Whitney U test   |

Microbial Variables

| Microbial Variable    | Group | Kolmogorov-Smirnov <sup>a</sup> |    |       | Shapiro-Wilk |    |       | Statistical Test Used |
|-----------------------|-------|---------------------------------|----|-------|--------------|----|-------|-----------------------|
|                       |       | Statistic                       | df | Sig.  | Statistic    | df | Sig.  |                       |
|                       | 1     |                                 | 15 |       |              | 15 |       |                       |
| Sanguibacteroides     | 0     | 0.530                           | 12 | 0.000 | 0.327        | 12 | 0.000 | Mann Whitney U test   |
|                       | 1     |                                 | 15 |       |              | 15 |       |                       |
| (blank)               | 0     | 0.404                           | 12 | 0.000 | 0.591        | 12 | 0.000 | Mann Whitney U test   |
|                       | 1     | 0.381                           | 15 | 0.000 | 0.639        | 15 | 0.000 |                       |
| Cyanobacteria         | 0     | 0.397                           | 12 | 0.000 | 0.399        | 12 | 0.000 | Mann Whitney U test   |
|                       | 1     | 0.453                           | 15 | 0.000 | 0.473        | 15 | 0.000 |                       |
| (blank)               | 0     | 0.397                           | 12 | 0.000 | 0.399        | 12 | 0.000 | Mann Whitney U test   |
|                       | 1     | 0.453                           | 15 | 0.000 | 0.473        | 15 | 0.000 |                       |
| Epsilonbacteraeota    | 0     | 0.530                           | 12 | 0.000 | 0.327        | 12 | 0.000 | Mann Whitney U test   |
|                       | 1     | 0.535                           | 15 | 0.000 | 0.284        | 15 | 0.000 |                       |
| Campylobacter         | 0     | 0.530                           | 12 | 0.000 | 0.327        | 12 | 0.000 | Mann Whitney U test   |
|                       | 1     | 0.535                           | 15 | 0.000 | 0.284        | 15 | 0.000 |                       |
| Euryarchaeota         | 0     | 0.382                           | 12 | 0.000 | 0.659        | 12 | 0.000 | Mann Whitney U test   |
|                       | 1     | 0.494                           | 15 | 0.000 | 0.389        | 15 | 0.000 |                       |
| Methanobrevibacter    | 0     | 0.375                           | 12 | 0.000 | 0.620        | 12 | 0.000 | Mann Whitney U test   |
|                       | 1     | 0.496                           | 15 | 0.000 | 0.395        | 15 | 0.000 |                       |
| Methanomassiliicoccus | 0     |                                 | 12 |       |              | 12 |       | Mann Whitney U test   |
|                       | 1     | 0.535                           | 15 | 0.000 | 0.284        | 15 | 0.000 |                       |
| Methanosphaera        | 0     | 0.473                           | 12 | 0.000 | 0.534        | 12 | 0.000 | Mann Whitney U test   |
|                       | 1     |                                 | 15 |       |              | 15 |       |                       |
| (blank)               | 0     | 0.530                           | 12 | 0.000 | 0.327        | 12 | 0.000 | Mann Whitney U test   |
|                       | 1     |                                 | 15 |       |              | 15 |       |                       |
| Firmicutes            | 0     | 0.181                           | 12 | .200* | 0.938        | 12 | 0.471 | Students t-test       |
|                       | 1     | 0.221                           | 15 | 0.047 | 0.912        | 15 | 0.147 |                       |
| Acetanaerobacterium   | 0     | 0.333                           | 12 | 0.001 | 0.715        | 12 | 0.001 | Mann Whitney U test   |
|                       | 1     | 0.433                           | 15 | 0.000 | 0.609        | 15 | 0.000 |                       |
| Acidaminococcus       | 0     | 0.454                           | 12 | 0.000 | 0.420        | 12 | 0.000 | Mann Whitney U test   |
|                       | 1     | 0.480                           | 15 | 0.000 | 0.513        | 15 | 0.000 |                       |
| Agathobacter          | 0     | 0.196                           | 12 | .200* | 0.886        | 12 | 0.105 | Students t-test       |

Microbial Variables

| Microbial Variable      | Group | Kolmogorov-Smirnov <sup>a</sup> |    |       | Shapiro-Wilk |    |       | Statistical Test Used |
|-------------------------|-------|---------------------------------|----|-------|--------------|----|-------|-----------------------|
|                         |       | Statistic                       | df | Sig.  | Statistic    | df | Sig.  |                       |
|                         | 1     | 0.108                           | 15 | .200* | 0.983        | 15 | 0.986 |                       |
| Allisonella             | 0     | 0.317                           | 12 | 0.002 | 0.780        | 12 | 0.006 | Mann Whitney U test   |
|                         | 1     | 0.468                           | 15 | 0.000 | 0.523        | 15 | 0.000 |                       |
| Anaerococcus            | 0     | 0.487                           | 12 | 0.000 | 0.496        | 12 | 0.000 | Mann Whitney U test   |
|                         | 1     | 0.535                           | 15 | 0.000 | 0.284        | 15 | 0.000 |                       |
| Anaerofilum             | 0     | 0.416                           | 12 | 0.000 | 0.702        | 12 | 0.001 | Mann Whitney U test   |
|                         | 1     | 0.409                           | 15 | 0.000 | 0.685        | 15 | 0.000 |                       |
| Anaerofustis            | 0     | 0.400                           | 12 | 0.000 | 0.692        | 12 | 0.001 | Mann Whitney U test   |
|                         | 1     | 0.296                           | 15 | 0.001 | 0.843        | 15 | 0.014 |                       |
| Anaerostipes            | 0     | 0.158                           | 12 | .200* | 0.949        | 12 | 0.620 | Students t-test       |
|                         | 1     | 0.123                           | 15 | .200* | 0.967        | 15 | 0.817 |                       |
| Anaerotruncus           | 0     | 0.267                           | 12 | 0.018 | 0.761        | 12 | 0.004 | Mann Whitney U test   |
|                         | 1     | 0.231                           | 15 | 0.031 | 0.881        | 15 | 0.049 |                       |
| Anaerovorax             | 0     | 0.530                           | 12 | 0.000 | 0.327        | 12 | 0.000 | Mann Whitney U test   |
|                         | 1     |                                 | 15 |       |              | 15 |       |                       |
| Angelakisella           | 0     | 0.233                           | 12 | 0.070 | 0.924        | 12 | 0.320 | Mann Whitney U test   |
|                         | 1     | 0.257                           | 15 | 0.009 | 0.799        | 15 | 0.004 |                       |
| Blautia                 | 0     | 0.206                           | 12 | 0.171 | 0.942        | 12 | 0.530 | Students t-test       |
|                         | 1     | 0.153                           | 15 | .200* | 0.829        | 15 | 0.009 |                       |
| Butyricicoccus          | 0     | 0.234                           | 12 | 0.068 | 0.862        | 12 | 0.052 | Students t-test       |
|                         | 1     | 0.267                           | 15 | 0.005 | 0.895        | 15 | 0.080 |                       |
| CAG-352                 | 0     | 0.487                           | 12 | 0.000 | 0.473        | 12 | 0.000 | Mann Whitney U test   |
|                         | 1     | 0.451                           | 15 | 0.000 | 0.523        | 15 | 0.000 |                       |
| CAG-56                  | 0     | 0.306                           | 12 | 0.003 | 0.821        | 12 | 0.017 | Mann Whitney U test   |
|                         | 1     | 0.285                           | 15 | 0.002 | 0.864        | 15 | 0.027 |                       |
| Candidatus_Arthromitus  | 0     |                                 | 12 |       |              | 12 |       | Mann Whitney U test   |
|                         | 1     | 0.535                           | 15 | 0.000 | 0.284        | 15 | 0.000 |                       |
| Candidatus_Soleaferrea  | 0     | 0.152                           | 12 | .200* | 0.974        | 12 | 0.951 | Students t-test       |
|                         | 1     | 0.133                           | 15 | .200* | 0.972        | 15 | 0.883 |                       |
| Candidatus_Stoquefichus | 0     | 0.366                           | 12 | 0.000 | 0.637        | 12 | 0.000 | Mann Whitney U test   |

Microbial Variables

| Microbial Variable Group      | Kolmogorov-Smirnov <sup>a</sup> |       |      | Shapiro-Wilk |       |      | Statistical Test Used |                     |
|-------------------------------|---------------------------------|-------|------|--------------|-------|------|-----------------------|---------------------|
|                               | Statistic                       | df    | Sig. | Statistic    | df    | Sig. |                       |                     |
|                               | 1                               | 0.503 | 15   | 0.000        | 0.418 | 15   | 0.000                 |                     |
| Caproiciproducens             | 0                               | 0.380 | 12   | 0.000        | 0.700 | 12   | 0.001                 | Mann Whitney U test |
|                               | 1                               | 0.357 | 15   | 0.000        | 0.710 | 15   | 0.000                 |                     |
| Catabacter                    | 0                               | 0.480 | 12   | 0.000        | 0.450 | 12   | 0.000                 | Mann Whitney U test |
|                               | 1                               | 0.313 | 15   | 0.000        | 0.817 | 15   | 0.006                 |                     |
| Catenibacterium               | 0                               | 0.348 | 12   | 0.000        | 0.673 | 12   | 0.000                 | Mann Whitney U test |
|                               | 1                               | 0.502 | 15   | 0.000        | 0.419 | 15   | 0.000                 |                     |
| Christensenellaceae_R-7_group | 0                               | 0.201 | 12   | 0.196        | 0.956 | 12   | 0.722                 | Mann Whitney U test |
|                               | 1                               | 0.282 | 15   | 0.002        | 0.648 | 15   | 0.000                 |                     |
| Clostridioides                | 0                               | 0.530 | 12   | 0.000        | 0.327 | 12   | 0.000                 | Mann Whitney U test |
|                               | 1                               |       | 15   |              |       | 15   |                       |                     |
| Clostridium_sensu_stricto_1   | 0                               | 0.198 | 12   | .200*        | 0.902 | 12   | 0.170                 | Mann Whitney U test |
|                               | 1                               | 0.382 | 15   | 0.000        | 0.619 | 15   | 0.000                 |                     |
| Coprobacillus                 | 0                               | 0.296 | 12   | 0.005        | 0.826 | 12   | 0.019                 | Mann Whitney U test |
|                               | 1                               | 0.439 | 15   | 0.000        | 0.445 | 15   | 0.000                 |                     |
| Coprococcus_1                 | 0                               | 0.237 | 12   | 0.061        | 0.797 | 12   | 0.009                 | Mann Whitney U test |
|                               | 1                               | 0.317 | 15   | 0.000        | 0.758 | 15   | 0.001                 |                     |
| Coprococcus_2                 | 0                               | 0.350 | 12   | 0.000        | 0.802 | 12   | 0.010                 | Mann Whitney U test |
|                               | 1                               | 0.410 | 15   | 0.000        | 0.619 | 15   | 0.000                 |                     |
| Coprococcus_3                 | 0                               | 0.184 | 12   | .200*        | 0.923 | 12   | 0.315                 | Mann Whitney U test |
|                               | 1                               | 0.370 | 15   | 0.000        | 0.776 | 15   | 0.002                 |                     |
| Cuneatibacter                 | 0                               |       | 12   |              |       | 12   |                       | Mann Whitney U test |
|                               | 1                               | 0.535 | 15   | 0.000        | 0.284 | 15   | 0.000                 |                     |
| Defluviitaleaceae_UCG-011     | 0                               | 0.391 | 12   | 0.000        | 0.587 | 12   | 0.000                 | Mann Whitney U test |
|                               | 1                               | 0.325 | 15   | 0.000        | 0.683 | 15   | 0.000                 |                     |
| Dialister                     | 0                               | 0.357 | 12   | 0.000        | 0.774 | 12   | 0.005                 | Mann Whitney U test |
|                               | 1                               | 0.394 | 15   | 0.000        | 0.750 | 15   | 0.001                 |                     |
| Dielma                        | 0                               | 0.348 | 12   | 0.000        | 0.803 | 12   | 0.010                 | Mann Whitney U test |
|                               | 1                               | 0.469 | 15   | 0.000        | 0.328 | 15   | 0.000                 |                     |
| Dorea                         | 0                               | 0.169 | 12   | .200*        | 0.881 | 12   | 0.091                 | Mann Whitney U test |

Microbial Variables

| Microbial Variable Group      | Kolmogorov-Smirnov <sup>a</sup> |    |       | Shapiro-Wilk |    |       | Statistical Test Used |
|-------------------------------|---------------------------------|----|-------|--------------|----|-------|-----------------------|
|                               | Statistic                       | df | Sig.  | Statistic    | df | Sig.  |                       |
| 1                             | 0.251                           | 15 | 0.012 | 0.693        | 15 | 0.000 |                       |
| DTU089 0                      | 0.241                           | 12 | 0.053 | 0.952        | 12 | 0.673 | Mann Whitney U test   |
| 1                             | 0.273                           | 15 | 0.004 | 0.788        | 15 | 0.003 |                       |
| Eisenbergiella 0              | 0.492                           | 12 | 0.000 | 0.382        | 12 | 0.000 | Mann Whitney U test   |
| 1                             | 0.299                           | 15 | 0.001 | 0.780        | 15 | 0.002 |                       |
| Enterococcus 0                | 0.490                           | 12 | 0.000 | 0.479        | 12 | 0.000 | Mann Whitney U test   |
| 1                             |                                 | 15 |       |              | 15 |       |                       |
| Epulopiscium 0                | 0.530                           | 12 | 0.000 | 0.327        | 12 | 0.000 | Mann Whitney U test   |
| 1                             |                                 | 15 |       |              | 15 |       |                       |
| Erysipelatoclostridium 0      | 0.411                           | 12 | 0.000 | 0.571        | 12 | 0.000 | Mann Whitney U test   |
| 1                             | 0.241                           | 15 | 0.019 | 0.860        | 15 | 0.024 |                       |
| Erysipelotrichaceae_UCG-003 0 | 0.262                           | 12 | 0.022 | 0.844        | 12 | 0.031 | Mann Whitney U test   |
| 1                             | 0.291                           | 15 | 0.001 | 0.719        | 15 | 0.000 |                       |
| Erysipelotrichaceae_UCG-006 0 | 0.530                           | 12 | 0.000 | 0.327        | 12 | 0.000 | Mann Whitney U test   |
| 1                             |                                 | 15 |       |              | 15 |       |                       |
| Eubacterium 0                 | 0.517                           | 12 | 0.000 | 0.387        | 12 | 0.000 | Mann Whitney U test   |
| 1                             | 0.506                           | 15 | 0.000 | 0.421        | 15 | 0.000 |                       |
| Ezakiella 0                   | 0.443                           | 12 | 0.000 | 0.617        | 12 | 0.000 | Mann Whitney U test   |
| 1                             | 0.497                           | 15 | 0.000 | 0.394        | 15 | 0.000 |                       |
| Faecalibacterium 0            | 0.273                           | 12 | 0.014 | 0.797        | 12 | 0.009 | Mann Whitney U test   |
| 1                             | 0.095                           | 15 | .200* | 0.987        | 15 | 0.996 |                       |
| Faecalitalea 0                | 0.400                           | 12 | 0.000 | 0.620        | 12 | 0.000 | Mann Whitney U test   |
| 1                             | 0.408                           | 15 | 0.000 | 0.554        | 15 | 0.000 |                       |
| Family_XIII_AD3011_group 0    | 0.110                           | 12 | .200* | 0.964        | 12 | 0.839 | Mann Whitney U test   |
| 1                             | 0.307                           | 15 | 0.000 | 0.798        | 15 | 0.004 |                       |
| Family_XIII_UCG-001 0         | 0.198                           | 12 | .200* | 0.912        | 12 | 0.223 | Students t-test       |
| 1                             | 0.144                           | 15 | .200* | 0.987        | 15 | 0.996 |                       |
| Fingoldia 0                   | 0.494                           | 12 | 0.000 | 0.487        | 12 | 0.000 | Mann Whitney U test   |
| 1                             | 0.466                           | 15 | 0.000 | 0.310        | 15 | 0.000 |                       |
| Flavonifractor 0              | 0.282                           | 12 | 0.009 | 0.685        | 12 | 0.001 | Mann Whitney U test   |

Microbial Variables

| Microbial Variable Group   | Kolmogorov-Smirnov <sup>a</sup> |    |       | Shapiro-Wilk |    |       | Statistical Test Used |
|----------------------------|---------------------------------|----|-------|--------------|----|-------|-----------------------|
|                            | Statistic                       | df | Sig.  | Statistic    | df | Sig.  |                       |
| 1                          | 0.252                           | 15 | 0.011 | 0.831        | 15 | 0.009 |                       |
| Fournierella 0             | 0.471                           | 12 | 0.000 | 0.545        | 12 | 0.000 | Mann Whitney U test   |
| 1                          | 0.484                           | 15 | 0.000 | 0.551        | 15 | 0.000 |                       |
| Fusicatenibacter 0         | 0.316                           | 12 | 0.002 | 0.704        | 12 | 0.001 | Mann Whitney U test   |
| 1                          | 0.219                           | 15 | 0.051 | 0.778        | 15 | 0.002 |                       |
| GCA-900066225 0            | 0.232                           | 12 | 0.074 | 0.902        | 12 | 0.169 | Mann Whitney U test   |
| 1                          | 0.336                           | 15 | 0.000 | 0.741        | 15 | 0.001 |                       |
| GCA-900066575 0            | 0.212                           | 12 | 0.142 | 0.935        | 12 | 0.441 | Students t-test       |
| 1                          | 0.169                           | 15 | .200* | 0.924        | 15 | 0.220 |                       |
| GCA-900066755 0            | 0.491                           | 12 | 0.000 | 0.484        | 12 | 0.000 | Mann Whitney U test   |
| 1                          | 0.406                           | 15 | 0.000 | 0.526        | 15 | 0.000 |                       |
| Gemella 0                  | 0.333                           | 12 | 0.001 | 0.748        | 12 | 0.003 | Mann Whitney U test   |
| 1                          | 0.279                           | 15 | 0.003 | 0.869        | 15 | 0.033 |                       |
| Granulicatella 0           | 0.269                           | 12 | 0.016 | 0.889        | 12 | 0.114 | Mann Whitney U test   |
| 1                          | 0.311                           | 15 | 0.000 | 0.707        | 15 | 0.000 |                       |
| Harryflintia 0             |                                 | 12 |       |              | 12 |       | Mann Whitney U test   |
| 1                          | 0.452                           | 15 | 0.000 | 0.522        | 15 | 0.000 |                       |
| Holdemanella 0             | 0.273                           | 12 | 0.014 | 0.795        | 12 | 0.008 | Mann Whitney U test   |
| 1                          | 0.411                           | 15 | 0.000 | 0.699        | 15 | 0.000 |                       |
| Holdemania 0               | 0.274                           | 12 | 0.013 | 0.763        | 12 | 0.004 | Mann Whitney U test   |
| 1                          | 0.203                           | 15 | 0.096 | 0.908        | 15 | 0.124 |                       |
| Howardella 0               | 0.339                           | 12 | 0.000 | 0.750        | 12 | 0.003 | Mann Whitney U test   |
| 1                          | 0.421                           | 15 | 0.000 | 0.620        | 15 | 0.000 |                       |
| Hungatella 0               | 0.419                           | 12 | 0.000 | 0.524        | 12 | 0.000 | Mann Whitney U test   |
| 1                          | 0.270                           | 15 | 0.004 | 0.752        | 15 | 0.001 |                       |
| Hydrogenoanaerobacterium 0 | 0.484                           | 12 | 0.000 | 0.465        | 12 | 0.000 | Mann Whitney U test   |
| 1                          | 0.490                           | 15 | 0.000 | 0.448        | 15 | 0.000 |                       |
| Intestinibacter 0          | 0.180                           | 12 | .200* | 0.956        | 12 | 0.727 | Mann Whitney U test   |
| 1                          | 0.360                           | 15 | 0.000 | 0.750        | 15 | 0.001 |                       |
| Intestinimonas 0           | 0.342                           | 12 | 0.000 | 0.686        | 12 | 0.001 | Mann Whitney U test   |

Microbial Variables

| Microbial Variable            | Group | Kolmogorov-Smirnov <sup>a</sup> |    |       | Shapiro-Wilk |    |       | Statistical Test Used |
|-------------------------------|-------|---------------------------------|----|-------|--------------|----|-------|-----------------------|
|                               |       | Statistic                       | df | Sig.  | Statistic    | df | Sig.  |                       |
|                               | 1     | 0.207                           | 15 | 0.084 | 0.896        | 15 | 0.084 |                       |
| Lachnoanaerobaculum           | 0     |                                 | 12 |       |              | 12 |       | Mann Whitney U test   |
|                               | 1     | 0.535                           | 15 | 0.000 | 0.284        | 15 | 0.000 |                       |
| Lachnoclostridium             | 0     | 0.209                           | 12 | 0.157 | 0.939        | 12 | 0.488 | Students t-test       |
|                               | 1     | 0.156                           | 15 | .200* | 0.943        | 15 | 0.418 |                       |
| Lachnospira                   | 0     | 0.170                           | 12 | .200* | 0.956        | 12 | 0.723 | Mann Whitney U test   |
|                               | 1     | 0.249                           | 15 | 0.013 | 0.778        | 15 | 0.002 |                       |
| Lachnospiraceae_FCS020_group  | 0     | 0.200                           | 12 | .200* | 0.884        | 12 | 0.097 | Students t-test       |
|                               | 1     | 0.217                           | 15 | 0.055 | 0.931        | 15 | 0.280 |                       |
| Lachnospiraceae_ND3007_group  | 0     | 0.215                           | 12 | 0.132 | 0.944        | 12 | 0.550 | Students t-test       |
|                               | 1     | 0.203                           | 15 | 0.098 | 0.892        | 15 | 0.071 |                       |
| Lachnospiraceae_NK4A136_group | 0     | 0.300                           | 12 | 0.004 | 0.692        | 12 | 0.001 | Mann Whitney U test   |
|                               | 1     | 0.207                           | 15 | 0.082 | 0.872        | 15 | 0.036 |                       |
| Lachnospiraceae_NK4B4_group   | 0     | 0.391                           | 12 | 0.000 | 0.421        | 12 | 0.000 | Mann Whitney U test   |
|                               | 1     | 0.361                           | 15 | 0.000 | 0.781        | 15 | 0.002 |                       |
| Lachnospiraceae_UCG-001       | 0     | 0.243                           | 12 | 0.048 | 0.822        | 12 | 0.017 | Mann Whitney U test   |
|                               | 1     | 0.354                           | 15 | 0.000 | 0.748        | 15 | 0.001 |                       |
| Lachnospiraceae_UCG-002       | 0     | 0.530                           | 12 | 0.000 | 0.327        | 12 | 0.000 | Mann Whitney U test   |
|                               | 1     |                                 | 15 |       |              | 15 |       |                       |
| Lachnospiraceae_UCG-003       | 0     | 0.492                           | 12 | 0.000 | 0.485        | 12 | 0.000 | Mann Whitney U test   |
|                               | 1     |                                 | 15 |       |              | 15 |       |                       |
| Lachnospiraceae_UCG-004       | 0     | 0.118                           | 12 | .200* | 0.970        | 12 | 0.913 | Mann Whitney U test   |
|                               | 1     | 0.270                           | 15 | 0.004 | 0.850        | 15 | 0.017 |                       |
| Lachnospiraceae_UCG-008       | 0     | 0.435                           | 12 | 0.000 | 0.575        | 12 | 0.000 | Mann Whitney U test   |
|                               | 1     | 0.409                           | 15 | 0.000 | 0.619        | 15 | 0.000 |                       |
| Lachnospiraceae_UCG-010       | 0     | 0.195                           | 12 | .200* | 0.949        | 12 | 0.627 | Students t-test       |
|                               | 1     | 0.194                           | 15 | 0.134 | 0.796        | 15 | 0.003 |                       |
| Lactobacillus                 | 0     | 0.390                           | 12 | 0.000 | 0.645        | 12 | 0.000 | Mann Whitney U test   |
|                               | 1     | 0.296                           | 15 | 0.001 | 0.669        | 15 | 0.000 |                       |
| Lactococcus                   | 0     | 0.283                           | 12 | 0.009 | 0.844        | 12 | 0.031 | Mann Whitney U test   |



Microbial Variables

| Microbial Variable | Group | Kolmogorov-Smirnov <sup>a</sup> |    |       | Shapiro-Wilk |    |       | Statistical Test Used |
|--------------------|-------|---------------------------------|----|-------|--------------|----|-------|-----------------------|
|                    |       | Statistic                       | df | Sig.  | Statistic    | df | Sig.  |                       |
|                    | 1     | 0.302                           | 15 | 0.001 | 0.859        | 15 | 0.023 |                       |
| Leuconostoc        | 0     | 0.409                           | 12 | 0.000 | 0.714        | 12 | 0.001 | Mann Whitney U test   |
|                    | 1     | 0.535                           | 15 | 0.000 | 0.284        | 15 | 0.000 |                       |
| Marvinbryantia     | 0     | 0.273                           | 12 | 0.014 | 0.813        | 12 | 0.013 | Mann Whitney U test   |
|                    | 1     | 0.320                           | 15 | 0.000 | 0.717        | 15 | 0.000 |                       |
| Megamonas          | 0     |                                 | 12 |       |              | 12 |       | Mann Whitney U test   |
|                    | 1     | 0.501                           | 15 | 0.000 | 0.405        | 15 | 0.000 |                       |
| Megasphaera        | 0     | 0.476                           | 12 | 0.000 | 0.440        | 12 | 0.000 | Mann Whitney U test   |
|                    | 1     | 0.444                           | 15 | 0.000 | 0.485        | 15 | 0.000 |                       |
| Merdibacter        | 0     |                                 | 12 |       |              | 12 |       | Mann Whitney U test   |
|                    | 1     | 0.478                           | 15 | 0.000 | 0.533        | 15 | 0.000 |                       |
| Mitsuokella        | 0     | 0.530                           | 12 | 0.000 | 0.327        | 12 | 0.000 | Mann Whitney U test   |
|                    | 1     | 0.535                           | 15 | 0.000 | 0.284        | 15 | 0.000 |                       |
| Mogibacterium      | 0     | 0.346                           | 12 | 0.000 | 0.731        | 12 | 0.002 | Mann Whitney U test   |
|                    | 1     | 0.514                           | 15 | 0.000 | 0.415        | 15 | 0.000 |                       |
| Murdochiella       | 0     | 0.530                           | 12 | 0.000 | 0.327        | 12 | 0.000 | Mann Whitney U test   |
|                    | 1     | 0.535                           | 15 | 0.000 | 0.284        | 15 | 0.000 |                       |
| Negativibacillus   | 0     | 0.198                           | 12 | .200* | 0.828        | 12 | 0.020 | Mann Whitney U test   |
|                    | 1     | 0.297                           | 15 | 0.001 | 0.830        | 15 | 0.009 |                       |
| Negativicoccus     | 0     |                                 | 12 |       |              | 12 |       | Mann Whitney U test   |
|                    | 1     | 0.535                           | 15 | 0.000 | 0.284        | 15 | 0.000 |                       |
| Nosocomiicoccus    | 0     |                                 | 12 |       |              | 12 |       | Mann Whitney U test   |
|                    | 1     | 0.535                           | 15 | 0.000 | 0.284        | 15 | 0.000 |                       |
| Oscillibacter      | 0     | 0.249                           | 12 | 0.039 | 0.893        | 12 | 0.129 | Students t-test       |
|                    | 1     | 0.090                           | 15 | .200* | 0.976        | 15 | 0.930 |                       |
| Oscillospira       | 0     | 0.454                           | 12 | 0.000 | 0.587        | 12 | 0.000 | Mann Whitney U test   |
|                    | 1     | 0.430                           | 15 | 0.000 | 0.568        | 15 | 0.000 |                       |
| Parvimonas         | 0     | 0.530                           | 12 | 0.000 | 0.327        | 12 | 0.000 | Mann Whitney U test   |
|                    | 1     | 0.440                           | 15 | 0.000 | 0.640        | 15 | 0.000 |                       |
| Pediococcus        | 0     |                                 | 12 |       |              | 12 |       | Mann Whitney U test   |

Microbial Variables

| Microbial Variable Group        | Kolmogorov-Smirnov <sup>a</sup> |    |       | Shapiro-Wilk |    |       | Statistical Test Used |
|---------------------------------|---------------------------------|----|-------|--------------|----|-------|-----------------------|
|                                 | Statistic                       | df | Sig.  | Statistic    | df | Sig.  |                       |
| 1                               | 0.433                           | 15 | 0.000 | 0.603        | 15 | 0.000 |                       |
| Peptoclostridium 0              | 0.530                           | 12 | 0.000 | 0.327        | 12 | 0.000 | Mann Whitney U test   |
| 1                               | 0.535                           | 15 | 0.000 | 0.284        | 15 | 0.000 |                       |
| Peptococcus 0                   | 0.479                           | 12 | 0.000 | 0.447        | 12 | 0.000 | Mann Whitney U test   |
| 1                               | 0.450                           | 15 | 0.000 | 0.524        | 15 | 0.000 |                       |
| Peptoniphilus 0                 | 0.431                           | 12 | 0.000 | 0.627        | 12 | 0.000 | Mann Whitney U test   |
| 1                               | 0.452                           | 15 | 0.000 | 0.466        | 15 | 0.000 |                       |
| Peptostreptococcus 0            | 0.530                           | 12 | 0.000 | 0.327        | 12 | 0.000 | Mann Whitney U test   |
| 1                               | 0.439                           | 15 | 0.000 | 0.331        | 15 | 0.000 |                       |
| Phascolarctobacterium 0         | 0.276                           | 12 | 0.012 | 0.776        | 12 | 0.005 | Mann Whitney U test   |
| 1                               | 0.296                           | 15 | 0.001 | 0.859        | 15 | 0.023 |                       |
| Phocea 0                        | 0.339                           | 12 | 0.000 | 0.732        | 12 | 0.002 | Mann Whitney U test   |
| 1                               | 0.237                           | 15 | 0.024 | 0.888        | 15 | 0.063 |                       |
| Romboutsia 0                    | 0.293                           | 12 | 0.005 | 0.745        | 12 | 0.002 | Mann Whitney U test   |
| 1                               | 0.315                           | 15 | 0.000 | 0.784        | 15 | 0.002 |                       |
| Roseburia 0                     | 0.221                           | 12 | 0.108 | 0.884        | 12 | 0.098 | Mann Whitney U test   |
| 1                               | 0.400                           | 15 | 0.000 | 0.487        | 15 | 0.000 |                       |
| Ruminiclostridium 0             | 0.530                           | 12 | 0.000 | 0.327        | 12 | 0.000 | Mann Whitney U test   |
| 1                               |                                 | 15 |       |              | 15 |       |                       |
| Ruminiclostridium_1 0           |                                 | 12 |       |              | 12 |       | Mann Whitney U test   |
| 1                               | 0.535                           | 15 | 0.000 | 0.284        | 15 | 0.000 |                       |
| Ruminiclostridium_5 0           | 0.255                           | 12 | 0.030 | 0.731        | 12 | 0.002 | Mann Whitney U test   |
| 1                               | 0.299                           | 15 | 0.001 | 0.717        | 15 | 0.000 |                       |
| Ruminiclostridium_6 0           | 0.329                           | 12 | 0.001 | 0.722        | 12 | 0.001 | Mann Whitney U test   |
| 1                               | 0.391                           | 15 | 0.000 | 0.621        | 15 | 0.000 |                       |
| Ruminiclostridium_9 0           | 0.194                           | 12 | .200* | 0.922        | 12 | 0.305 | Mann Whitney U test   |
| 1                               | 0.231                           | 15 | 0.031 | 0.872        | 15 | 0.037 |                       |
| Ruminococcaceae_NK4A214_group 0 | 0.335                           | 12 | 0.001 | 0.660        | 12 | 0.000 | Mann Whitney U test   |
| 1                               | 0.335                           | 15 | 0.000 | 0.684        | 15 | 0.000 |                       |
| Ruminococcaceae_UCG-002 0       | 0.214                           | 12 | 0.134 | 0.931        | 12 | 0.395 | Students t-test       |

Microbial Variables

| Microbial Variable Group | Kolmogorov-Smirnov <sup>a</sup> |       |       | Shapiro-Wilk |       |       | Statistical Test Used |                     |
|--------------------------|---------------------------------|-------|-------|--------------|-------|-------|-----------------------|---------------------|
|                          | Statistic                       | df    | Sig.  | Statistic    | df    | Sig.  |                       |                     |
| 1                        | 0.102                           | 15    | .200* | 0.970        | 15    | 0.864 |                       |                     |
| Ruminococcaceae_UCG-003  | 0                               | 0.286 | 12    | 0.008        | 0.821 | 12    | 0.016                 | Mann Whitney U test |
| 1                        | 0.380                           | 15    | 0.000 | 0.723        | 15    | 0.000 |                       |                     |
| Ruminococcaceae_UCG-004  | 0                               | 0.135 | 12    | .200*        | 0.928 | 12    | 0.360                 | Students t-test     |
| 1                        | 0.205                           | 15    | 0.090 | 0.851        | 15    | 0.018 |                       |                     |
| Ruminococcaceae_UCG-005  | 0                               | 0.220 | 12    | 0.114        | 0.907 | 12    | 0.198                 | Mann Whitney U test |
| 1                        | 0.422                           | 15    | 0.000 | 0.509        | 15    | 0.000 |                       |                     |
| Ruminococcaceae_UCG-007  | 0                               | 0.502 | 12    | 0.000        | 0.448 | 12    | 0.000                 | Mann Whitney U test |
| 1                        | 0.535                           | 15    | 0.000 | 0.284        | 15    | 0.000 |                       |                     |
| Ruminococcaceae_UCG-008  | 0                               | 0.403 | 12    | 0.000        | 0.607 | 12    | 0.000                 | Mann Whitney U test |
| 1                        |                                 | 15    |       |              | 15    |       |                       |                     |
| Ruminococcaceae_UCG-009  | 0                               | 0.309 | 12    | 0.002        | 0.746 | 12    | 0.002                 | Mann Whitney U test |
| 1                        | 0.353                           | 15    | 0.000 | 0.574        | 15    | 0.000 |                       |                     |
| Ruminococcaceae_UCG-010  | 0                               | 0.262 | 12    | 0.023        | 0.822 | 12    | 0.017                 | Mann Whitney U test |
| 1                        | 0.418                           | 15    | 0.000 | 0.676        | 15    | 0.000 |                       |                     |
| Ruminococcaceae_UCG-011  | 0                               | 0.403 | 12    | 0.000        | 0.686 | 12    | 0.001                 | Mann Whitney U test |
| 1                        | 0.495                           | 15    | 0.000 | 0.443        | 15    | 0.000 |                       |                     |
| Ruminococcaceae_UCG-013  | 0                               | 0.120 | 12    | .200*        | 0.964 | 12    | 0.842                 | Students t-test     |
| 1                        | 0.165                           | 15    | .200* | 0.894        | 15    | 0.077 |                       |                     |
| Ruminococcaceae_UCG-014  | 0                               | 0.308 | 12    | 0.003        | 0.837 | 12    | 0.026                 | Mann Whitney U test |
| 1                        | 0.352                           | 15    | 0.000 | 0.665        | 15    | 0.000 |                       |                     |
| Ruminococcus_1           | 0                               | 0.221 | 12    | 0.110        | 0.890 | 12    | 0.119                 | Students t-test     |
| 1                        | 0.177                           | 15    | .200* | 0.915        | 15    | 0.164 |                       |                     |
| Ruminococcus_2           | 0                               | 0.334 | 12    | 0.001        | 0.830 | 12    | 0.021                 | Mann Whitney U test |
| 1                        | 0.265                           | 15    | 0.006 | 0.925        | 15    | 0.227 |                       |                     |
| S5-A14a                  | 0                               | 0.530 | 12    | 0.000        | 0.327 | 12    | 0.000                 | Mann Whitney U test |
| 1                        | 0.535                           | 15    | 0.000 | 0.284        | 15    | 0.000 |                       |                     |
| Sarcina                  | 0                               | 0.530 | 12    | 0.000        | 0.327 | 12    | 0.000                 | Mann Whitney U test |
| 1                        | 0.535                           | 15    | 0.000 | 0.284        | 15    | 0.000 |                       |                     |
| Sellimonas               | 0                               | 0.422 | 12    | 0.000        | 0.587 | 12    | 0.000                 | Mann Whitney U test |

Microbial Variables

| Microbial Variable | Group | Kolmogorov-Smirnov <sup>a</sup> |    |       | Shapiro-Wilk |    |       | Statistical Test Used |
|--------------------|-------|---------------------------------|----|-------|--------------|----|-------|-----------------------|
|                    |       | Statistic                       | df | Sig.  | Statistic    | df | Sig.  |                       |
|                    | 1     | 0.275                           | 15 | 0.003 | 0.648        | 15 | 0.000 |                       |
| Shuttleworthia     | 0     | 0.530                           | 12 | 0.000 | 0.327        | 12 | 0.000 | Mann Whitney U test   |
|                    | 1     | 0.378                           | 15 | 0.000 | 0.754        | 15 | 0.001 |                       |
| Solobacterium      | 0     | 0.530                           | 12 | 0.000 | 0.327        | 12 | 0.000 | Mann Whitney U test   |
|                    | 1     |                                 | 15 |       |              | 15 |       |                       |
| Staphylococcus     | 0     | 0.530                           | 12 | 0.000 | 0.327        | 12 | 0.000 | Mann Whitney U test   |
|                    | 1     |                                 | 15 |       |              | 15 |       |                       |
| Streptococcus      | 0     | 0.414                           | 12 | 0.000 | 0.478        | 12 | 0.000 | Mann Whitney U test   |
|                    | 1     | 0.315                           | 15 | 0.000 | 0.682        | 15 | 0.000 |                       |
| Subdoligranulum    | 0     | 0.220                           | 12 | 0.114 | 0.872        | 12 | 0.070 | Mann Whitney U test   |
|                    | 1     | 0.288                           | 15 | 0.002 | 0.728        | 15 | 0.000 |                       |
| Succiniclasticum   | 0     | 0.530                           | 12 | 0.000 | 0.327        | 12 | 0.000 | Mann Whitney U test   |
|                    | 1     | 0.535                           | 15 | 0.000 | 0.284        | 15 | 0.000 |                       |
| Terrisporobacter   | 0     | 0.370                           | 12 | 0.000 | 0.648        | 12 | 0.000 | Mann Whitney U test   |
|                    | 1     | 0.369                           | 15 | 0.000 | 0.675        | 15 | 0.000 |                       |
| Turcibacter        | 0     | 0.324                           | 12 | 0.001 | 0.844        | 12 | 0.031 | Mann Whitney U test   |
|                    | 1     | 0.469                           | 15 | 0.000 | 0.419        | 15 | 0.000 |                       |
| Tyzzarella         | 0     | 0.387                           | 12 | 0.000 | 0.487        | 12 | 0.000 | Mann Whitney U test   |
|                    | 1     | 0.467                           | 15 | 0.000 | 0.474        | 15 | 0.000 |                       |
| Tyzzarella_3       | 0     | 0.412                           | 12 | 0.000 | 0.385        | 12 | 0.000 | Mann Whitney U test   |
|                    | 1     | 0.340                           | 15 | 0.000 | 0.554        | 15 | 0.000 |                       |
| Tyzzarella_4       | 0     | 0.344                           | 12 | 0.000 | 0.703        | 12 | 0.001 | Mann Whitney U test   |
|                    | 1     | 0.364                           | 15 | 0.000 | 0.599        | 15 | 0.000 |                       |
| UBA1819            | 0     | 0.398                           | 12 | 0.000 | 0.535        | 12 | 0.000 | Mann Whitney U test   |
|                    | 1     | 0.209                           | 15 | 0.076 | 0.881        | 15 | 0.049 |                       |
| UC5-1-2E3          | 0     | 0.490                           | 12 | 0.000 | 0.479        | 12 | 0.000 | Mann Whitney U test   |
|                    | 1     | 0.475                           | 15 | 0.000 | 0.490        | 15 | 0.000 |                       |
| Veillonella        | 0     | 0.229                           | 12 | 0.081 | 0.914        | 12 | 0.241 | Students t-test       |
|                    | 1     | 0.193                           | 15 | 0.137 | 0.938        | 15 | 0.360 |                       |
| Weissella          | 0     | 0.457                           | 12 | 0.000 | 0.366        | 12 | 0.000 | Mann Whitney U test   |
|                    | 1     |                                 | 15 |       |              | 15 |       |                       |

Microbial Variables

| Microbial Variable Group                     | Kolmogorov-Smirnov <sup>a</sup> |    |       | Shapiro-Wilk |    |       | Statistical Test Used |
|----------------------------------------------|---------------------------------|----|-------|--------------|----|-------|-----------------------|
|                                              | Statistic                       | df | Sig.  | Statistic    | df | Sig.  |                       |
| (blank) 0                                    | 0.189                           | 12 | .200* | 0.958        | 12 | 0.757 | Mann Whitney U test   |
| 1                                            | 0.226                           | 15 | 0.037 | 0.810        | 15 | 0.005 |                       |
| Fusobacteria 0                               | 0.530                           | 12 | 0.000 | 0.327        | 12 | 0.000 | Mann Whitney U test   |
| 1                                            | 0.508                           | 15 | 0.000 | 0.293        | 15 | 0.000 |                       |
| Fusobacterium 0                              |                                 | 12 |       |              | 12 |       | Mann Whitney U test   |
| 1                                            | 0.535                           | 15 | 0.000 | 0.284        | 15 | 0.000 |                       |
| Sneathia 0                                   | 0.530                           | 12 | 0.000 | 0.327        | 12 | 0.000 | Mann Whitney U test   |
| 1                                            | 0.477                           | 15 | 0.000 | 0.316        | 15 | 0.000 |                       |
| Lentisphaerae 0                              | 0.369                           | 12 | 0.000 | 0.753        | 12 | 0.003 | Mann Whitney U test   |
| 1                                            | 0.461                           | 15 | 0.000 | 0.596        | 15 | 0.000 |                       |
| Victivallis 0                                | 0.438                           | 12 | 0.000 | 0.504        | 12 | 0.000 | Mann Whitney U test   |
| 1                                            | 0.461                           | 15 | 0.000 | 0.596        | 15 | 0.000 |                       |
| (blank) 0                                    | 0.402                           | 12 | 0.000 | 0.679        | 12 | 0.001 | Mann Whitney U test   |
| 1                                            |                                 | 15 |       |              | 15 |       |                       |
| Patescibacteria 0                            | 0.530                           | 12 | 0.000 | 0.327        | 12 | 0.000 | Mann Whitney U test   |
| 1                                            | 0.340                           | 15 | 0.000 | 0.765        | 15 | 0.001 |                       |
| (blank) 0                                    | 0.530                           | 12 | 0.000 | 0.327        | 12 | 0.000 | Mann Whitney U test   |
| 1                                            | 0.340                           | 15 | 0.000 | 0.765        | 15 | 0.001 |                       |
| Proteobacteria 0                             | 0.231                           | 12 | 0.078 | 0.879        | 12 | 0.084 | Students t-test       |
| 1                                            | 0.113                           | 15 | .200* | 0.981        | 15 | 0.975 |                       |
| Bilophila 0                                  | 0.206                           | 12 | 0.171 | 0.911        | 12 | 0.217 | Students t-test       |
| 1                                            | 0.128                           | 15 | .200* | 0.957        | 15 | 0.643 |                       |
| Burkholderia-Caballeronia-Paraburkholderia 0 |                                 | 12 |       |              | 12 |       | Mann Whitney U test   |
| 1                                            | 0.535                           | 15 | 0.000 | 0.284        | 15 | 0.000 |                       |
| Desulfovibrio 0                              | 0.285                           | 12 | 0.008 | 0.759        | 12 | 0.003 | Mann Whitney U test   |
| 1                                            | 0.440                           | 15 | 0.000 | 0.661        | 15 | 0.000 |                       |
| Escherichia/Shigella 0                       | 0.163                           | 12 | .200* | 0.949        | 12 | 0.630 | Mann Whitney U test   |
| 1                                            | 0.390                           | 15 | 0.000 | 0.581        | 15 | 0.000 |                       |
| Haemophilus 0                                | 0.262                           | 12 | 0.023 | 0.735        | 12 | 0.002 | Mann Whitney U test   |
| 1                                            | 0.327                           | 15 | 0.000 | 0.743        | 15 | 0.001 |                       |

Microbial Variables

| Microbial Variable Group | Kolmogorov-Smirnov <sup>a</sup> |    |       | Shapiro-Wilk |    |       | Statistical Test Used |
|--------------------------|---------------------------------|----|-------|--------------|----|-------|-----------------------|
|                          | Statistic                       | df | Sig.  | Statistic    | df | Sig.  |                       |
| Oxalobacter 0            | 0.498                           | 12 | 0.000 | 0.461        | 12 | 0.000 | Mann Whitney U test   |
| 1                        | 0.535                           | 15 | 0.000 | 0.284        | 15 | 0.000 |                       |
| Parasutterella 0         | 0.307                           | 12 | 0.003 | 0.739        | 12 | 0.002 | Mann Whitney U test   |
| 1                        | 0.255                           | 15 | 0.010 | 0.895        | 15 | 0.080 |                       |
| Pseudomonas 0            | 0.530                           | 12 | 0.000 | 0.327        | 12 | 0.000 | Mann Whitney U test   |
| 1                        | 0.514                           | 15 | 0.000 | 0.376        | 15 | 0.000 |                       |
| Sutterella 0             | 0.328                           | 12 | 0.001 | 0.845        | 12 | 0.032 | Mann Whitney U test   |
| 1                        | 0.307                           | 15 | 0.000 | 0.800        | 15 | 0.004 |                       |
| (blank) 0                | 0.412                           | 12 | 0.000 | 0.566        | 12 | 0.000 | Mann Whitney U test   |
| 1                        | 0.233                           | 15 | 0.028 | 0.867        | 15 | 0.030 |                       |
| Spirochaetes 0           | 0.530                           | 12 | 0.000 | 0.327        | 12 | 0.000 | Mann Whitney U test   |
| 1                        |                                 | 15 |       |              | 15 |       |                       |
| (blank) 0                | 0.530                           | 12 | 0.000 | 0.327        | 12 | 0.000 | Mann Whitney U test   |
| 1                        |                                 | 15 |       |              | 15 |       |                       |
| Synergistetes 0          | 0.400                           | 12 | 0.000 | 0.571        | 12 | 0.000 | Mann Whitney U test   |
| 1                        | 0.535                           | 15 | 0.000 | 0.284        | 15 | 0.000 |                       |
| Cloacibacillus 0         | 0.407                           | 12 | 0.000 | 0.550        | 12 | 0.000 | Mann Whitney U test   |
| 1                        | 0.535                           | 15 | 0.000 | 0.284        | 15 | 0.000 |                       |
| Pyramidobacter 0         | 0.530                           | 12 | 0.000 | 0.327        | 12 | 0.000 | Mann Whitney U test   |
| 1                        |                                 | 15 |       |              | 15 |       |                       |
| Tenericutes 0            | 0.460                           | 12 | 0.000 | 0.397        | 12 | 0.000 | Mann Whitney U test   |
| 1                        | 0.505                           | 15 | 0.000 | 0.467        | 15 | 0.000 |                       |
| (blank) 0                | 0.460                           | 12 | 0.000 | 0.397        | 12 | 0.000 | Mann Whitney U test   |
| 1                        | 0.505                           | 15 | 0.000 | 0.467        | 15 | 0.000 |                       |
| Verrucomicrobia 0        | 0.397                           | 12 | 0.000 | 0.596        | 12 | 0.000 | Mann Whitney U test   |
| 1                        | 0.346                           | 15 | 0.000 | 0.646        | 15 | 0.000 |                       |
| Akkermansia 0            | 0.394                           | 12 | 0.000 | 0.600        | 12 | 0.000 | Mann Whitney U test   |
| 1                        | 0.346                           | 15 | 0.000 | 0.646        | 15 | 0.000 |                       |
| Cerasicoccus 0           | 0.530                           | 12 | 0.000 | 0.327        | 12 | 0.000 | Mann Whitney U test   |
| 1                        |                                 | 15 |       |              | 15 |       |                       |
| (blank) 0                | 0.530                           | 12 | 0.000 | 0.327        | 12 | 0.000 | Mann Whitney U test   |

Microbial Variables

| Microbial Variable Group     | Kolmogorov-Smirnov <sup>a</sup> |    |       | Shapiro-Wilk |    |       | Statistical Test Used |
|------------------------------|---------------------------------|----|-------|--------------|----|-------|-----------------------|
|                              | Statistic                       | df | Sig.  | Statistic    | df | Sig.  |                       |
| 1                            |                                 | 15 |       |              | 15 |       |                       |
| (blank) 0                    | 0.373                           | 12 | 0.000 | 0.574        | 12 | 0.000 | Mann Whitney U test   |
| 1                            | 0.250                           | 15 | 0.012 | 0.844        | 15 | 0.014 |                       |
| (blank) 0                    | 0.373                           | 12 | 0.000 | 0.574        | 12 | 0.000 | Mann Whitney U test   |
| 1                            | 0.250                           | 15 | 0.012 | 0.844        | 15 | 0.014 |                       |
| Grand Total 0                | 0.142                           | 12 | .200* | 0.978        | 12 | 0.975 | Students t-test       |
| 1                            | 0.168                           | 15 | .200* | 0.921        | 15 | 0.196 |                       |
| BacteroidetesDIVFirmicutes 0 | 0.289                           | 12 | 0.006 | 0.708        | 12 | 0.001 | Mann Whitney U test   |
| 1                            | 0.459                           | 15 | 0.000 | 0.371        | 15 | 0.000 |                       |

\*. This is a lower bound of the true significance.

a. Lilliefors Significance Correction

## Raw Stool Microbiome Data

| <b>Stool Providing (Microbiome)</b> |                        |                       |            |               |
|-------------------------------------|------------------------|-----------------------|------------|---------------|
| <b>Cohort n=27</b>                  |                        |                       |            |               |
| <b>SubjectID</b>                    | <b>Treatment Group</b> | <b>Age - Baseline</b> | <b>Sex</b> | <b>Race</b>   |
| Subject 1                           | Colchicine             | 46.114                | F          | WHITE         |
| Subject 2                           | Colchicine             | 49.725                | F          | BLACK         |
| Subject 3                           | Colchicine             | 64.873                | F          | UNKNOWN       |
| Subject 4                           | Colchicine             | 69.634                | M          | MULTIPLE RACE |
| Subject 5                           | Colchicine             | 23.956                | M          | WHITE         |
| Subject 6                           | Colchicine             | 51.715                | F          | BLACK         |
| Subject 7                           | Colchicine             | 42.949                | M          | WHITE         |
| Subject 8                           | Colchicine             | 63.247                | F          | BLACK         |
| Subject 9                           | Colchicine             | 49.706                | F          | WHITE         |
| Subject 10                          | Colchicine             | 55.655                | F          | WHITE         |
| Subject 11                          | Colchicine             | 64.197                | F          | MULTIPLE RACE |
| Subject 12                          | Colchicine             | 30.338                | F          | UNKNOWN       |
| Subject 13                          | Colchicine             | 46.152                | F          | WHITE         |
| Subject 14                          | Colchicine             | 36.487                | F          | WHITE         |
| Subject 15                          | Colchicine             | 58.886                | F          | WHITE         |
| Subject 16                          | Placebo                | 21.065                | M          | MULTIPLE RACE |
| Subject 17                          | Placebo                | 37.092                | F          | BLACK         |
| Subject 18                          | Placebo                | 46.957                | F          | WHITE         |
| Subject 19                          | Placebo                | 53.407                | F          | WHITE         |
| Subject 20                          | Placebo                | 52.794                | F          | UNKNOWN       |
| Subject 21                          | Placebo                | 42.585                | M          | BLACK         |
| Subject 22                          | Placebo                | 35.869                | F          | UNKNOWN       |
| Subject 23                          | Placebo                | 49.117                | F          | UNKNOWN       |
| Subject 24                          | Placebo                | 58.376                | F          | WHITE         |
| Subject 25                          | Placebo                | 51.858                | F          | UNKNOWN       |
| Subject 26                          | Placebo                | 60.022                | F          | BLACK         |
| Subject 27                          | Placebo                | 57.958                | F          | WHITE         |



Raw Stool Microbiome Data

| <b>Stool Providing (Microbiome)</b> |                       |                   |             |                       |                    |             |
|-------------------------------------|-----------------------|-------------------|-------------|-----------------------|--------------------|-------------|
| <b>Cohort n=27</b>                  |                       |                   |             |                       |                    |             |
| <b>SubjectID</b>                    | <b>BMI - Baseline</b> | <b>BMI -Final</b> | <b>ΔBMI</b> | <b>A1c - Baseline</b> | <b>A1c - Final</b> | <b>ΔA1c</b> |
| Subject 1                           | 33.4                  | 33.2              | -0.2        | 5.4                   | 5.6                | 0.20        |
| Subject 2                           | 31.2                  | 30.9              | -0.3        | 6                     | 5.9                | -0.10       |
| Subject 3                           | 34                    | 34.4              | 0.4         | 5.7                   | 5.6                | -0.10       |
| Subject 4                           | 41.5                  | 40.9              | -0.6        | 5.4                   | 5.4                | 0.00        |
| Subject 5                           | 31.6                  | 31.6              | 0.0         | 5.3                   | 5.1                | -0.20       |
| Subject 6                           | 51.9                  | 51.2              | -0.7        | 6                     | 5.7                | -0.30       |
| Subject 7                           | 42.6                  | 43                | 0.4         | 4.9                   | 4.9                | 0.00        |
| Subject 8                           | 40.3                  | 38.6              | -1.7        | 6.7                   | 6.3                | -0.40       |
| Subject 9                           | 31.1                  | 31.8              | 0.7         | 5.7                   | 5.5                | -0.20       |
| Subject 10                          | 32.6                  | 32.2              | -0.4        | 5.7                   | 5.2                | -0.50       |
| Subject 11                          | 42.8                  | 43.1              | 0.3         | 5.8                   | 5.7                | -0.10       |
| Subject 12                          | 47.8                  | 48.1              | 0.3         | 5.6                   | 5.5                | -0.10       |
| Subject 13                          | 38.1                  | 37                | -1.1        | 5.2                   | 5.1                | -0.10       |
| Subject 14                          | 37.5                  | 38.8              | 1.3         | 5.9                   | 6.1                | 0.20        |
| Subject 15                          | 36                    | 36                | 0.0         | 5.4                   | 5.7                | 0.30        |
| Subject 16                          | 60                    | 59.1              | -0.9        | 4.9                   | 5.3                | 0.40        |
| Subject 17                          | 38.5                  | 41.8              | 3.3         | 5.4                   | 5.5                | 0.10        |
| Subject 18                          | 33.9                  | 35.3              | 1.4         | 5.4                   | 5.4                | 0.00        |
| Subject 19                          | 39.9                  | 40.5              | 0.6         | 5.2                   | 5.3                | 0.10        |
| Subject 20                          | 42.4                  | 41.4              | -1.0        | 5.6                   | 5.5                | -0.10       |
| Subject 21                          | 32.3                  | 33.1              | 0.8         | 5.4                   | 6.1                | 0.70        |
| Subject 22                          | 38.4                  | 38.6              | 0.2         | 5.7                   | 5.3                | -0.40       |
| Subject 23                          | 36.1                  | 36.3              | 0.2         | 5.1                   | 5.2                | 0.10        |
| Subject 24                          | 40.8                  | 41.1              | 0.3         | 5.7                   | 6.1                | 0.40        |
| Subject 25                          | 34.6                  | 36.5              | 1.9         | 5.2                   | 5.0                | -0.20       |
| Subject 26                          | 36.6                  | 37.5              | 0.9         | 5.7                   | 5.1                | -0.60       |
| Subject 27                          | 40                    | 39.9              | -0.1        | 5                     | 5.4                | 0.40        |

Raw Stool Microbiome Data

| <b>Stool Providing (Microbiome)</b> |                         |                      |               |                       |                    |             |
|-------------------------------------|-------------------------|----------------------|---------------|-----------------------|--------------------|-------------|
| <b>Cohort n=27</b>                  |                         |                      |               |                       |                    |             |
| <b>SubjectID</b>                    | <b>hsCRP - Baseline</b> | <b>hsCRP - Final</b> | <b>ΔhsCRP</b> | <b>IL6 - Baseline</b> | <b>IL6 - Final</b> | <b>ΔIL6</b> |
| Subject 1                           | 6.5                     | 2.50                 | -4.00         | 714.20                | 642.70             | -71.50      |
| Subject 2                           | 2                       | 1.10                 | -0.90         | 507.50                | 494.80             | -12.70      |
| Subject 3                           | 2.1                     | 2.40                 | 0.30          | 500.90                | 470.50             | -30.40      |
| Subject 4                           | 2.6                     | 1.60                 | -1.00         | 658.10                | 613.70             | -44.40      |
| Subject 5                           | 3.7                     | 2.10                 | -1.60         | 527.50                | 513.20             | -14.30      |
| Subject 6                           | 4.3                     | 1.20                 | -3.10         | 544.50                | 532.00             | -12.50      |
| Subject 7                           | 14.5                    | 5.30                 | -9.20         | 643.30                | 495.60             | -147.70     |
| Subject 8                           | 10.7                    | 5.00                 | -5.70         | 571.80                | 469.90             | -101.90     |
| Subject 9                           | 2.9                     | 1.80                 | -1.10         | 863.70                | 831.90             | -31.80      |
| Subject 10                          | 2.1                     | 1.60                 | -0.50         | N/A                   | N/A                | #NULL!      |
| Subject 11                          | 34.7                    | 3.40                 | -31.30        | 682.50                | 510.90             | -171.60     |
| Subject 12                          | 12.8                    | 7.50                 | -5.30         | 1448.30               | 948.00             | -500.30     |
| Subject 13                          | 8.1                     | 1.90                 | -6.20         | 687.20                | 616.30             | -70.90      |
| Subject 14                          | 7.2                     | 4.90                 | -2.30         | 622.00                | 568.90             | -53.10      |
| Subject 15                          | 3.2                     | 2.70                 | -0.50         | 510.90                | 429.10             | -81.80      |
| Subject 16                          | 16.7                    | 15.80                | -0.90         | 731.10                | 555.30             | -175.80     |
| Subject 17                          | 3.1                     | 4.30                 | 1.20          | 527.80                | 420.30             | -107.50     |
| Subject 18                          | 4.3                     | 2.80                 | -1.50         | 559.80                | 576.00             | 16.20       |
| Subject 19                          | 3.7                     | 4.70                 | 1.00          | 571.60                | 621.80             | 50.20       |
| Subject 20                          | 6.9                     | 12.20                | 5.30          | 649.10                | 702.10             | 53.00       |
| Subject 21                          | 3.5                     | 2.80                 | -0.70         | 512.40                | 517.90             | 5.50        |
| Subject 22                          | 12                      | 8.80                 | -3.20         | 546.90                | 628.70             | 81.80       |
| Subject 23                          | 6.9                     | 9.90                 | 3.00          | 576.50                | 564.90             | -11.60      |
| Subject 24                          | 4.9                     | 5.90                 | 1.00          | 575.90                | 578.10             | 2.20        |
| Subject 25                          | 7.6                     | 8.50                 | 0.90          | 609.40                | 675.50             | 66.10       |
| Subject 26                          | 5.2                     | 3.30                 | -1.90         | 617.30                | 497.80             | -119.50     |
| Subject 27                          | 3.4                     | 38.50                | 35.10         | 557.50                | 713.20             | 155.70      |

Raw Stool Microbiome Data

| <b>Stool Providing (Microbiome)</b> |                               |                            |                     |                       |
|-------------------------------------|-------------------------------|----------------------------|---------------------|-----------------------|
| <b>Cohort n=27</b>                  |                               |                            |                     |                       |
| <b>SubjectID</b>                    | <b>Neutrophils - Baseline</b> | <b>Neutrophils - Final</b> | <b>ΔNeutrophils</b> | <b>WBC - Baseline</b> |
| Subject 1                           | 4.39                          | 3.41                       | -0.98               | 6.37                  |
| Subject 2                           | 3.38                          | 2.41                       | -0.97               | 6.08                  |
| Subject 3                           | 3.63                          | 2.81                       | -0.82               | 6.48                  |
| Subject 4                           | 2.71                          | 2.28                       | -0.43               | 5.41                  |
| Subject 5                           | 3.99                          | 3.66                       | -0.33               | 6.59                  |
| Subject 6                           | 7.34                          | 3.75                       | -3.59               | 11.67                 |
| Subject 7                           | 4.46                          | 2.40                       | -2.06               | 7.05                  |
| Subject 8                           | 3.40                          | 2.56                       | -0.84               | 6.19                  |
| Subject 9                           | 4.45                          | 3.42                       | -1.03               | 7.16                  |
| Subject 10                          | 3.62                          | 2.41                       | -1.21               | 7                     |
| Subject 11                          | 2.34                          | 1.16                       | -1.18               | 4.79                  |
| Subject 12                          | 7.98                          | 4.31                       | -3.67               | 10.39                 |
| Subject 13                          | 5.67                          | 4.16                       | -1.51               | 9.92                  |
| Subject 14                          | 4.05                          | 2.42                       | -1.63               | 7.12                  |
| Subject 15                          | 5.48                          | 4.85                       | -0.63               | 9.21                  |
| Subject 16                          | 4.34                          | 4.08                       | -0.26               | 7.69                  |
| Subject 17                          | 1.73                          | 2.32                       | 0.59                | 3.71                  |
| Subject 18                          | 4.19                          | 3.20                       | -0.99               | 7.03                  |
| Subject 19                          | 2.62                          | 2.93                       | 0.31                | 4.46                  |
| Subject 20                          | 3.68                          | 4.86                       | 1.18                | 6.76                  |
| Subject 21                          | 3.14                          | 2.50                       | -0.64               | 5.98                  |
| Subject 22                          | 4.22                          | 4.30                       | 0.08                | 7.29                  |
| Subject 23                          | 4.85                          | 4.23                       | -0.62               | 8.46                  |
| Subject 24                          | 3.00                          | 3.20                       | 0.20                | 5.75                  |
| Subject 25                          | 3.06                          | 2.33                       | -0.73               | 5.54                  |
| Subject 26                          | 2.37                          | 2.14                       | -0.23               | 4.93                  |
| Subject 27                          | 2.24                          | 4.12                       | 1.88                | 4.11                  |

## Raw Stool Microbiome Data

| <b>Stool Providing (Microbiome)</b> |                    |                               |                         |                      |                                 |
|-------------------------------------|--------------------|-------------------------------|-------------------------|----------------------|---------------------------------|
| <b>Cohort n=27</b>                  |                    |                               |                         |                      |                                 |
| <b>SubjectID</b>                    | <b>WBC - Final</b> | <b><math>\Delta</math>WBC</b> | <b>GlycA - Baseline</b> | <b>GlycA - Final</b> | <b><math>\Delta</math>GlycA</b> |
| Subject 1                           | 5.68               | -0.69                         | 421.544968              | 440.66               | 19.1127                         |
| Subject 2                           | 4.80               | -1.28                         | 438.063123              | 401.41               | -36.6502                        |
| Subject 3                           | 5.96               | -0.52                         | 438.445869              | 410.99               | -27.4578                        |
| Subject 4                           | 5.03               | -0.38                         | 377.04287               | 368.40               | -8.6431                         |
| Subject 5                           | 6.26               | -0.33                         | 348.644035              | 322.37               | -26.2703                        |
| Subject 6                           | 7.66               | -4.01                         | 549.975734              | 508.41               | -41.5663                        |
| Subject 7                           | 4.26               | -2.79                         | 414.386973              | 377.63               | -36.7520                        |
| Subject 8                           | 5.77               | -0.42                         | 455.475884              | 391.75               | -63.7261                        |
| Subject 9                           | 6.54               | -0.62                         | 346.215097              | 368.94               | 22.7289                         |
| Subject 10                          | 5.45               | -1.55                         | 379.834036              | 374.04               | -5.7903                         |
| Subject 11                          | 2.73               | -2.06                         | 498.694521              | 378.56               | -120.1298                       |
| Subject 12                          | 7.26               | -3.13                         | 420.809625              | 436.26               | 15.4493                         |
| Subject 13                          | 7.66               | -2.26                         | 370.965394              | 319.25               | -51.7134                        |
| Subject 14                          | 5.41               | -1.71                         | 476.564434              | 497.34               | 20.7716                         |
| Subject 15                          | 8.10               | -1.11                         | 427.344121              | 415.54               | -11.8026                        |
| Subject 16                          | 8.20               | 0.51                          | 441.139297              | 464.87               | 23.7294                         |
| Subject 17                          | 5.01               | 1.30                          | 404.426147              | 414.95               | 10.5240                         |
| Subject 18                          | 5.72               | -1.31                         | 395.511739              | 425.58               | 30.0691                         |
| Subject 19                          | 5.01               | 0.55                          | 433.58872               | 495.17               | 61.5832                         |
| Subject 20                          | 7.99               | 1.23                          | 391.739577              | 434.73               | 42.9919                         |
| Subject 21                          | 4.83               | -1.15                         | 400.278068              | 404.31               | 4.0309                          |
| Subject 22                          | 8.08               | 0.79                          | 427.250244              | 450.40               | 23.1531                         |
| Subject 23                          | 7.63               | -0.83                         | 391.128394              | 401.63               | 10.4969                         |
| Subject 24                          | 6.02               | 0.27                          | 395.393512              | 424.35               | 28.9530                         |
| Subject 25                          | 4.87               | -0.67                         | 518.582058              | 467.43               | -51.1552                        |
| Subject 26                          | 4.53               | -0.40                         | 420.434854              | 419.77               | -0.6626                         |
| Subject 27                          | 6.05               | 1.94                          | 425.792474              | 521.82               | 96.0230                         |

## Raw Stool Microbiome Data

| <b>Stool Providing (Microbiome)</b> |                            |                         |                  |                           |
|-------------------------------------|----------------------------|-------------------------|------------------|---------------------------|
| <b>Cohort n=27</b>                  |                            |                         |                  |                           |
| <b>SubjectID</b>                    | <b>Resistin - Baseline</b> | <b>Resistin - Final</b> | <b>ΔResistin</b> | <b>Shannon - Baseline</b> |
| Subject 1                           | 4019.0                     | 3343.3                  | -675.7           | 4.0513                    |
| Subject 2                           | 3939.9                     | 3694.3                  | -245.6           | 3.9030                    |
| Subject 3                           | 3249.6                     | 2662.1                  | -587.5           | 3.7090                    |
| Subject 4                           | 2946.5                     | 2894.0                  | -52.5            | 4.1066                    |
| Subject 5                           | 5156.1                     | 4799.6                  | -356.5           | 3.6598                    |
| Subject 6                           | 4880.0                     | 3928.5                  | -951.5           | 4.6890                    |
| Subject 7                           | 4130.5                     | 3054.0                  | -1076.5          | 3.8635                    |
| Subject 8                           | 3254.6                     | 2257.7                  | -996.9           | 3.9548                    |
| Subject 9                           | 3860.4                     | 3075.4                  | -785.0           | 3.9669                    |
| Subject 10                          | N/A                        | N/A                     | #NULL!           | 3.8364                    |
| Subject 11                          | 6248.2                     | 4301.3                  | -1946.9          | 3.6820                    |
| Subject 12                          | 4947.6                     | 3300.6                  | -1647.0          | 4.1567                    |
| Subject 13                          | 5659.9                     | 4473.7                  | -1186.2          | 4.4512                    |
| Subject 14                          | 4790.6                     | 4073.6                  | -717.0           | 4.1562                    |
| Subject 15                          | 3827.3                     | 3671.2                  | -156.1           | 4.0662                    |
| Subject 16                          | 5825.5                     | 5834.5                  | 9.0              | 3.3567                    |
| Subject 17                          | 4484.7                     | 4945.4                  | 460.7            | 3.8089                    |
| Subject 18                          | 3809.0                     | 3861.9                  | 52.9             | 3.8684                    |
| Subject 19                          | 3657.6                     | 3712.5                  | 54.9             | 3.5371                    |
| Subject 20                          | 2601.3                     | 2755.0                  | 153.7            | 4.3707                    |
| Subject 21                          | 2810.2                     | 2614.3                  | -195.9           | 3.3646                    |
| Subject 22                          | 3305.5                     | 2872.5                  | -433.0           | 4.6298                    |
| Subject 23                          | 3186.0                     | 2902.3                  | -283.7           | 4.5210                    |
| Subject 24                          | 3266.9                     | 3330.1                  | 63.2             | 4.4827                    |
| Subject 25                          | 3906.4                     | 3871.7                  | -34.7            | 3.8165                    |
| Subject 26                          | 3406.1                     | 3753.4                  | 347.3            | 3.9686                    |
| Subject 27                          | 2620.5                     | 2768.1                  | 147.6            | 3.5947                    |

Raw Stool Microbiome Data

| <b>Stool Providing (Microbiome)</b> |                        |                 |                         |                      |               |
|-------------------------------------|------------------------|-----------------|-------------------------|----------------------|---------------|
| <b>Cohort n=27</b>                  |                        |                 |                         |                      |               |
| <b>SubjectID</b>                    | <b>Shannon - Final</b> | <b>ΔShannon</b> | <b>Chao1 - Baseline</b> | <b>Chao1 - Final</b> | <b>ΔChao1</b> |
| Subject 1                           | 4.0092                 | -0.0420889      | 217.2000000             | 227.0000000          | 9.80          |
| Subject 2                           | 3.9276                 | 0.0245827       | 161.0000000             | 172.0000000          | 11.00         |
| Subject 3                           | 3.6078                 | -0.1012669      | 131.0000000             | 120.0000000          | -11.00        |
| Subject 4                           | 4.0284                 | -0.0781197      | 274.6666667             | 272.7500000          | -1.92         |
| Subject 5                           | 3.7228                 | 0.0629801       | 189.0000000             | 205.0000000          | 16.00         |
| Subject 6                           | 4.5392                 | -0.1498547      | 333.0000000             | 352.6666667          | 19.67         |
| Subject 7                           | 4.0425                 | 0.1790279       | 221.0000000             | 220.3750000          | -0.63         |
| Subject 8                           | 3.8508                 | -0.1039705      | 206.0000000             | 191.0000000          | -15.00        |
| Subject 9                           | 3.2173                 | -0.7495793      | 182.0000000             | 134.5000000          | -47.50        |
| Subject 10                          | 3.6635                 | -0.1729213      | 185.0000000             | 155.0000000          | -30.00        |
| Subject 11                          | 3.2757                 | -0.4062532      | 152.0000000             | 107.0000000          | -45.00        |
| Subject 12                          | 4.0388                 | -0.1179705      | 188.0000000             | 203.0000000          | 15.00         |
| Subject 13                          | 4.4046                 | -0.0466052      | 313.0000000             | 278.0000000          | -35.00        |
| Subject 14                          | 4.1192                 | -0.0370081      | 221.0000000             | 247.0000000          | 26.00         |
| Subject 15                          | 4.1231                 | 0.0569238       | 182.0000000             | 175.0000000          | -7.00         |
| Subject 16                          | 3.8179                 | 0.4612041       | 233.2000000             | 256.0000000          | 22.80         |
| Subject 17                          | 4.0790                 | 0.2701005       | 245.5000000             | 257.2500000          | 11.75         |
| Subject 18                          | 3.2892                 | -0.5792097      | 211.5000000             | 156.0000000          | -55.50        |
| Subject 19                          | 3.5809                 | 0.0437887       | 144.0000000             | 159.0000000          | 15.00         |
| Subject 20                          | 4.2395                 | -0.1312663      | 344.0000000             | 320.0000000          | -24.00        |
| Subject 21                          | 3.4720                 | 0.1073767       | 113.0000000             | 114.0000000          | 1.00          |
| Subject 22                          | 4.6737                 | 0.0439258       | 366.0000000             | 371.0000000          | 5.00          |
| Subject 23                          | 4.6904                 | 0.1693543       | 232.0000000             | 323.1111111          | 91.11         |
| Subject 24                          | 4.1097                 | -0.3729465      | 251.0000000             | 231.0000000          | -20.00        |
| Subject 25                          | 3.5017                 | -0.3148334      | 257.0000000             | 172.0000000          | -85.00        |
| Subject 26                          | 3.7247                 | -0.2438235      | 192.0000000             | 189.0000000          | -3.00         |
| Subject 27                          | 3.6525                 | 0.0578001       | 185.0000000             | 217.0000000          | 32.00         |

Raw Stool Microbiome Data

| <b>Stool Providing (Microbiome)</b> |                          |                       |                                  |                       |                    |
|-------------------------------------|--------------------------|-----------------------|----------------------------------|-----------------------|--------------------|
| <b>Cohort n=27</b>                  |                          |                       |                                  |                       |                    |
| <b>SubjectID</b>                    | <b>Pielou - Baseline</b> | <b>Pielou - Final</b> | <b><math>\Delta</math>Pielou</b> | <b>ACE - Baseline</b> | <b>ACE - Final</b> |
| Subject 1                           | 0.75                     | 0.74                  | -0.01401222                      | 217.39                | 227.22             |
| Subject 2                           | 0.77                     | 0.76                  | -0.00508608                      | 161.00                | 172.00             |
| Subject 3                           | 0.76                     | 0.75                  | -0.00721478                      | 131.24                | 120.00             |
| Subject 4                           | 0.73                     | 0.72                  | -0.01345627                      | 274.10                | 272.58             |
| Subject 5                           | 0.70                     | 0.70                  | 0.00117272                       | 189.18                | 205.00             |
| Subject 6                           | 0.81                     | 0.77                  | -0.03319645                      | 333.00                | 352.85             |
| Subject 7                           | 0.72                     | 0.75                  | 0.03379427                       | 221.21                | 220.94             |
| Subject 8                           | 0.74                     | 0.73                  | -0.00911076                      | 206.15                | 191.00             |
| Subject 9                           | 0.76                     | 0.66                  | -0.10438587                      | 182.00                | 134.83             |
| Subject 10                          | 0.73                     | 0.73                  | -0.00850558                      | 185.21                | 155.00             |
| Subject 11                          | 0.73                     | 0.70                  | -0.03187978                      | 152.14                | 107.00             |
| Subject 12                          | 0.79                     | 0.76                  | -0.03367205                      | 188.00                | 203.21             |
| Subject 13                          | 0.77                     | 0.78                  | 0.00804118                       | 313.00                | 278.00             |
| Subject 14                          | 0.77                     | 0.75                  | -0.02226097                      | 221.00                | 247.00             |
| Subject 15                          | 0.78                     | 0.80                  | 0.01695507                       | 182.00                | 175.23             |
| Subject 16                          | 0.62                     | 0.69                  | 0.07271802                       | 233.42                | 256.15             |
| Subject 17                          | 0.69                     | 0.74                  | 0.04322531                       | 245.73                | 257.39             |
| Subject 18                          | 0.72                     | 0.65                  | -0.07211322                      | 210.67                | 156.25             |
| Subject 19                          | 0.71                     | 0.71                  | -0.00527452                      | 144.00                | 159.00             |
| Subject 20                          | 0.75                     | 0.73                  | -0.01374736                      | 343.66                | 320.17             |
| Subject 21                          | 0.71                     | 0.73                  | 0.02134747                       | 113.00                | 114.26             |
| Subject 22                          | 0.78                     | 0.79                  | 0.00562575                       | 366.18                | 371.16             |
| Subject 23                          | 0.83                     | 0.81                  | -0.01822866                      | 232.22                | 323.53             |
| Subject 24                          | 0.81                     | 0.76                  | -0.05614824                      | 251.21                | 231.15             |
| Subject 25                          | 0.69                     | 0.68                  | -0.00750576                      | 257.16                | 172.21             |
| Subject 26                          | 0.75                     | 0.71                  | -0.04424785                      | 192.16                | 189.00             |
| Subject 27                          | 0.69                     | 0.68                  | -0.00967671                      | 185.17                | 217.00             |

## Raw Stool Microbiome Data

| Stool Providing (Microbiome) |              |                                   |                                |
|------------------------------|--------------|-----------------------------------|--------------------------------|
| Cohort n=27                  |              |                                   |                                |
| SubjectID                    | $\Delta$ ACE | Faith phylogenetic div - Baseline | Faith phylogenetic div - Final |
| Subject 1                    | 9.8250218    | 13.0079441                        | 13.1979007                     |
| Subject 2                    | 11.0000000   | 9.3896204                         | 11.1346723                     |
| Subject 3                    | -11.2430420  | 8.0979464                         | 7.4851464                      |
| Subject 4                    | -1.5146898   | 15.8879273                        | 15.6498258                     |
| Subject 5                    | 15.8232353   | 11.5446093                        | 12.0591068                     |
| Subject 6                    | 19.8492392   | 19.1793310                        | 19.6328479                     |
| Subject 7                    | -0.2758201   | 12.2978772                        | 12.0450455                     |
| Subject 8                    | -15.1450777  | 12.1888241                        | 11.8368215                     |
| Subject 9                    | -47.1659358  | 10.2318546                        | 7.8488620                      |
| Subject 10                   | -30.2093453  | 11.4982503                        | 10.0365963                     |
| Subject 11                   | -45.1382979  | 9.7538834                         | 7.7738448                      |
| Subject 12                   | 15.2089240   | 11.6497760                        | 12.5156360                     |
| Subject 13                   | -35.0000000  | 17.6498083                        | 17.5510006                     |
| Subject 14                   | 26.0000000   | 13.1676130                        | 14.4343089                     |
| Subject 15                   | -6.7731116   | 11.1375653                        | 10.4746241                     |
| Subject 16                   | 22.7232182   | 13.5003086                        | 14.3148285                     |
| Subject 17                   | 11.6676868   | 14.8674375                        | 14.9594740                     |
| Subject 18                   | -54.4193597  | 12.9235227                        | 10.4960756                     |
| Subject 19                   | 15.0000000   | 9.4204577                         | 8.5863109                      |
| Subject 20                   | -23.4875185  | 20.5214211                        | 18.7565963                     |
| Subject 21                   | 1.2591940    | 7.1159468                         | 7.7657700                      |
| Subject 22                   | 4.9725987    | 21.7138620                        | 21.1076535                     |
| Subject 23                   | 91.3105374   | 15.3184036                        | 18.9457480                     |
| Subject 24                   | -20.0604551  | 13.9139404                        | 12.9076846                     |
| Subject 25                   | -84.9488180  | 15.1805494                        | 14.3223475                     |
| Subject 26                   | -3.1578947   | 12.1278504                        | 10.2799047                     |
| Subject 27                   | 31.8295403   | 10.6447362                        | 11.8793325                     |



## Raw Stool Microbiome Data

| <b>Stool Providing (Microbiome)</b> |                                                |                      |                   |                              |
|-------------------------------------|------------------------------------------------|----------------------|-------------------|------------------------------|
| <b>Cohort n=27</b>                  |                                                |                      |                   |                              |
| <b>SubjectID</b>                    | <b><math>\Delta</math>Faithphylogeneticdiv</b> | <b>SR - Baseline</b> | <b>SR - Final</b> | <b><math>\Delta</math>SR</b> |
| Subject 1                           | 0.1899565                                      | 217                  | 227               | 10                           |
| Subject 2                           | 1.7450518                                      | 161                  | 172               | 11                           |
| Subject 3                           | -0.6128000                                     | 131                  | 120               | -11                          |
| Subject 4                           | -0.2381015                                     | 273                  | 272               | -1                           |
| Subject 5                           | 0.5144975                                      | 189                  | 205               | 16                           |
| Subject 6                           | 0.4535169                                      | 333                  | 352               | 19                           |
| Subject 7                           | -0.2528316                                     | 221                  | 220               | -1                           |
| Subject 8                           | -0.3520026                                     | 206                  | 191               | -15                          |
| Subject 9                           | -2.3829926                                     | 182                  | 133               | -49                          |
| Subject 10                          | -1.4616540                                     | 185                  | 155               | -30                          |
| Subject 11                          | -1.9800386                                     | 152                  | 107               | -45                          |
| Subject 12                          | 0.8658600                                      | 188                  | 203               | 15                           |
| Subject 13                          | -0.0988077                                     | 313                  | 278               | -35                          |
| Subject 14                          | 1.2666959                                      | 221                  | 247               | 26                           |
| Subject 15                          | -0.6629412                                     | 182                  | 175               | -7                           |
| Subject 16                          | 0.8145199                                      | 233                  | 256               | 23                           |
| Subject 17                          | 0.0920364                                      | 245                  | 256               | 11                           |
| Subject 18                          | -2.4274472                                     | 210                  | 156               | -54                          |
| Subject 19                          | -0.8341468                                     | 144                  | 159               | 15                           |
| Subject 20                          | -1.7648248                                     | 343                  | 320               | -23                          |
| Subject 21                          | 0.6498232                                      | 113                  | 114               | 1                            |
| Subject 22                          | -0.6062086                                     | 366                  | 371               | 5                            |
| Subject 23                          | 3.6273445                                      | 232                  | 323               | 91                           |
| Subject 24                          | -1.0062558                                     | 251                  | 231               | -20                          |
| Subject 25                          | -0.8582020                                     | 257                  | 172               | -85                          |
| Subject 26                          | -1.8479457                                     | 192                  | 189               | -3                           |
| Subject 27                          | 1.2345964                                      | 185                  | 217               | 32                           |

## Raw Stool Microbiome Data

| <b>Stool Providing (Microbiome)</b> |                                 |                             |                                         |                   |
|-------------------------------------|---------------------------------|-----------------------------|-----------------------------------------|-------------------|
| <b>Cohort n=27</b>                  |                                 |                             |                                         |                   |
| <b>SubjectID</b>                    | <b>Oscillibacter - Baseline</b> | <b>Oscillibacter- Final</b> | <b><math>\Delta</math>Oscillibacter</b> | <b>LogShannon</b> |
| Subject 1                           | 119                             | 122                         | 3                                       | -0.02             |
| Subject 2                           | 236                             | 448                         | 212                                     | 0.01              |
| Subject 3                           | 120                             | 73                          | -47                                     | -0.05             |
| Subject 4                           | 201                             | 293                         | 92                                      | -0.04             |
| Subject 5                           | 186                             | 210                         | 24                                      | 0.03              |
| Subject 6                           | 67                              | 102                         | 35                                      | -0.07             |
| Subject 7                           | 282                             | 166                         | -116                                    | 0.07              |
| Subject 8                           | 235                             | 115                         | -120                                    | -0.05             |
| Subject 9                           | 244                             | 37                          | -207                                    | -0.60             |
| Subject 10                          | 305                             | 149                         | -156                                    | -0.08             |
| Subject 11                          | 380                             | 155                         | -225                                    | -0.23             |
| Subject 12                          | 21                              | 55                          | 34                                      | -0.05             |
| Subject 13                          | 115                             | 46                          | -69                                     | -0.02             |
| Subject 14                          | 99                              | 159                         | 60                                      | -0.02             |
| Subject 15                          | 93                              | 70                          | -23                                     | 0.02              |
| Subject 16                          | 0                               | 15                          | 15                                      | 0.16              |
| Subject 17                          | 117                             | 147                         | 30                                      | 0.10              |
| Subject 18                          | 326                             | 130                         | -196                                    | -0.38             |
| Subject 19                          | 214                             | 610                         | 396                                     | 0.02              |
| Subject 20                          | 37                              | 126                         | 89                                      | -0.06             |
| Subject 21                          | 114                             | 450                         | 336                                     | 0.04              |
| Subject 22                          | 50                              | 41                          | -9                                      | 0.02              |
| Subject 23                          | 59                              | 118                         | 59                                      | 0.07              |
| Subject 24                          | 21                              | 82                          | 61                                      | -0.20             |
| Subject 25                          | 73                              | 19                          | -54                                     | -0.16             |
| Subject 26                          | 36                              | 436                         | 400                                     | -0.12             |
| Subject 27                          | 0                               | 103                         | 103                                     | 0.02              |

## Raw Stool Microbiome Data

| <b>Stool Providing (Microbiome)</b> |                |               |                       |                      |                   |
|-------------------------------------|----------------|---------------|-----------------------|----------------------|-------------------|
| <b>Cohort n=27</b>                  |                |               |                       |                      |                   |
| <b>SubjectID</b>                    | <b>LogHSCR</b> | <b>LogIL6</b> | <b>LogNeutrophils</b> | <b>WinsorShannon</b> | <b>WinsorHSCR</b> |
| Subject 1                           | 1.56           | 2.72          | 0.48                  | -0.04                | -4.00             |
| Subject 2                           | 1.59           | 2.77          | 0.48                  | 0.02                 | -0.90             |
| Subject 3                           | 1.61           | 2.76          | 0.50                  | -0.10                | 0.30              |
| Subject 4                           | 1.59           | 2.74          | 0.55                  | -0.08                | -1.00             |
| Subject 5                           | 1.58           | 2.77          | 0.56                  | 0.06                 | -1.60             |
| Subject 6                           | 1.57           | 2.77          | -0.39                 | -0.15                | -3.10             |
| Subject 7                           | 1.49           | 2.66          | 0.29                  | 0.18                 | -9.20             |
| Subject 8                           | 1.54           | 2.70          | 0.50                  | -0.10                | -5.70             |
| Subject 9                           | 1.59           | 2.75          | 0.47                  | -0.58                | -1.10             |
| Subject 10                          | 1.60           | #NULL!        | 0.45                  | -0.17                | -0.50             |
| Subject 11                          | 0.94           | 2.63          | 0.45                  | -0.41                | -9.20             |
| Subject 12                          | 1.54           | 2.00          | -0.48                 | -0.12                | -5.30             |
| Subject 13                          | 1.53           | 2.72          | 0.40                  | -0.05                | -6.20             |
| Subject 14                          | 1.58           | 2.74          | 0.37                  | -0.04                | -2.30             |
| Subject 15                          | 1.60           | 2.71          | 0.53                  | 0.06                 | -0.50             |
| Subject 16                          | 1.59           | 2.63          | 0.57                  | 0.46                 | -0.90             |
| Subject 17                          | 1.61           | 2.69          | 0.66                  | 0.27                 | 1.20              |
| Subject 18                          | 1.59           | 2.79          | 0.48                  | -0.58                | -1.50             |
| Subject 19                          | 1.61           | 2.81          | 0.63                  | 0.04                 | 1.00              |
| Subject 20                          | 1.66           | 2.81          | 0.71                  | -0.13                | 5.30              |
| Subject 21                          | 1.59           | 2.78          | 0.53                  | 0.11                 | -0.70             |
| Subject 22                          | 1.57           | 2.83          | 0.61                  | 0.04                 | -3.20             |
| Subject 23                          | 1.63           | 2.77          | 0.53                  | 0.17                 | 3.00              |
| Subject 24                          | 1.61           | 2.78          | 0.62                  | -0.37                | 1.00              |
| Subject 25                          | 1.61           | 2.82          | 0.51                  | -0.31                | 0.90              |
| Subject 26                          | 1.58           | 2.68          | 0.58                  | -0.24                | -1.90             |
| Subject 27                          | 1.88           | 2.88          | 0.77                  | 0.06                 | 5.30              |

Raw Stool Microbiome Data

| <b>Stool Providing (Microbiome)</b> |                  |                          |  |                    |                   |
|-------------------------------------|------------------|--------------------------|--|--------------------|-------------------|
| <b>Cohort n=27</b>                  |                  |                          |  |                    |                   |
| <b>SubjectID</b>                    | <b>WinsorIL6</b> | <b>WinsorNeutrophils</b> |  | <b>ZWinsorHSCR</b> | <b>ZWinsorIL6</b> |
| Subject 1                           | -71.50           | -0.98                    |  | -0.69803           | -0.39226          |
| Subject 2                           | -12.70           | -0.97                    |  | 0.17139            | 0.30921           |
| Subject 3                           | -30.40           | -0.82                    |  | 0.50794            | 0.09805           |
| Subject 4                           | -44.40           | -0.43                    |  | 0.14335            | -0.06896          |
| Subject 5                           | -14.30           | -0.33                    |  | -0.02493           | 0.29013           |
| Subject 6                           | -12.50           | -2.06                    |  | -0.44562           | 0.31160           |
| Subject 7                           | -147.70          | -2.06                    |  | -2.15642           | -1.30132          |
| Subject 8                           | -101.90          | -0.84                    |  | -1.17481           | -0.75493          |
| Subject 9                           | -31.80           | -1.03                    |  | 0.11530            | 0.08135           |
| Subject 10                          | #NULL!           | -1.21                    |  | 0.28358            | #NULL!            |
| Subject 11                          | -171.60          | -1.18                    |  | -2.15642           | -1.58644          |
| Subject 12                          | -175.80          | -2.06                    |  | -1.06263           | -1.63655          |
| Subject 13                          | -70.90           | -1.51                    |  | -1.31504           | -0.38511          |
| Subject 14                          | -53.10           | -1.63                    |  | -0.22125           | -0.17275          |
| Subject 15                          | -81.80           | -0.63                    |  | 0.28358            | -0.51514          |
| Subject 16                          | -175.80          | -0.26                    |  | 0.17139            | -1.63655          |
| Subject 17                          | -107.50          | 0.59                     |  | 0.76036            | -0.82174          |
| Subject 18                          | 16.20            | -0.99                    |  | 0.00312            | 0.65399           |
| Subject 19                          | 50.20            | 0.31                     |  | 0.70427            | 1.05960           |
| Subject 20                          | 53.00            | 1.18                     |  | 1.91024            | 1.09300           |
| Subject 21                          | 5.50             | -0.64                    |  | 0.22748            | 0.52634           |
| Subject 22                          | 81.80            | 0.08                     |  | -0.47367           | 1.43659           |
| Subject 23                          | -11.60           | -0.62                    |  | 1.26518            | 0.32234           |
| Subject 24                          | 2.20             | 0.20                     |  | 0.70427            | 0.48697           |
| Subject 25                          | 66.10            | -0.73                    |  | 0.67622            | 1.24929           |
| Subject 26                          | -119.50          | -0.23                    |  | -0.10907           | -0.96490          |
| Subject 27                          | 155.70           | 1.88                     |  | 1.91024            | 2.31820           |

## Raw Stool Microbiome Data

| <b>Stool Providing (Microbiome)</b> |                     |          |            |
|-------------------------------------|---------------------|----------|------------|
| <b>Cohort n=27</b>                  |                     |          |            |
| <b>SubjectID</b>                    | ZWinsornNeutrophils | ZΔGlycA  | ZΔResistin |
| Subject 1                           | -0.37588            | 0.50130  | -0.41570   |
| Subject 2                           | -0.36519            | -0.78067 | 0.29626    |
| Subject 3                           | -0.20477            | -0.56934 | -0.26970   |
| Subject 4                           | 0.21230             | -0.13680 | 0.61591    |
| Subject 5                           | 0.31924             | -0.54204 | 0.11268    |
| Subject 6                           | -1.53085            | -0.89369 | -0.87224   |
| Subject 7                           | -1.53085            | -0.78301 | -1.07916   |
| Subject 8                           | -0.22616            | -1.40314 | -0.94740   |
| Subject 9                           | -0.42935            | 0.58443  | -0.59663   |
| Subject 10                          | -0.62185            | -0.07121 | #NULL!     |
| Subject 11                          | -0.58976            | -2.69985 | -2.51997   |
| Subject 12                          | -1.53085            | 0.41708  | -2.02353   |
| Subject 13                          | -0.94267            | -1.12697 | -1.26075   |
| Subject 14                          | -1.07100            | 0.53944  | -0.48407   |
| Subject 15                          | -0.00158            | -0.20943 | 0.44441    |
| Subject 16                          | 0.39410             | 0.60744  | 0.71771    |
| Subject 17                          | 1.30311             | 0.30385  | 1.46543    |
| Subject 18                          | -0.38657            | 0.75318  | 0.79038    |
| Subject 19                          | 1.00367             | 1.47769  | 0.79369    |
| Subject 20                          | 1.93406             | 1.05028  | 0.95724    |
| Subject 21                          | -0.01228            | 0.15457  | 0.37853    |
| Subject 22                          | 0.75770             | 0.59419  | -0.01395   |
| Subject 23                          | 0.00911             | 0.30323  | 0.23319    |
| Subject 24                          | 0.88603             | 0.72753  | 0.80743    |
| Subject 25                          | -0.10853            | -1.11414 | 0.64537    |
| Subject 26                          | 0.42618             | 0.04667  | 1.27771    |
| Subject 27                          | 2.68265             | 2.26945  | 0.94714    |



Raw Stool Microbiome Data

| <b>Non - Stool Providing Cohort n=13</b>             |                 |            |              |                 |                     |                |
|------------------------------------------------------|-----------------|------------|--------------|-----------------|---------------------|----------------|
| <b>Baseline</b>                                      |                 |            |              |                 |                     |                |
| <b>SubjectID</b>                                     | <b>BMI</b>      | <b>A1c</b> | <b>hsCRP</b> | <b>Fat Mass</b> | <b>Fat Mass (%)</b> | <b>HOMA-IR</b> |
| Subject 28                                           | 43.7            | 5.7        | 8.9          | 60020.21        | 0.501953742         | 5.9            |
| Subject 29                                           | 35.9            | 6          | 9.2          | 48457.08        | 0.49678973          | 5.31           |
| Subject 30                                           | 45.7            | 5.8        | 9.2          | 67401.1         | 0.514625786         | 12.29          |
| Subject 31                                           | 47.4            | 5.7        | 4.3          | 55328.08865     | 0.447387934         | 6.27           |
| Subject 32                                           | 44.5            | 5.4        | 4.1          | 59617.43787     | 0.533625092         | 3.19           |
| Subject 33                                           | 72.4            | 5.2        | 16           | 104431.0073     | 0.582010304         | 13.55          |
| Subject 34                                           | 39.9            | 6.4        | 3            | 39693.33278     | 0.379102566         | 2.37           |
| Subject 35                                           | 52.5            | 5.8        | 3.1          | 85933.75        | 0.50075384          | 11.73          |
| Subject 36                                           | 54.5            | 6.3        | 11.1         | 75410.65        | 0.568624628         | 5.06           |
| Subject 37                                           | 38.6            | 6.5        | 6            | 48816.3247      | 0.486220186         | 9.89           |
| Subject 38                                           | 43.3            | 5.7        | 6.4          | 53060.28905     | 0.500744648         | 5.57           |
| Subject 39                                           | 61.2            | 5.3        | 15.9         | 105204.4956     | 0.589131648         | 6.83           |
| Subject 40                                           | 43.6            | 4.9        | 3.5          | 61295.83672     | 0.490125172         | 7.93           |
|                                                      |                 |            |              |                 |                     |                |
| <b>LogTransform of hsCRP for stool vs. non-stool</b> |                 |            |              |                 |                     |                |
| <b>SubjectID</b>                                     | Non-stool hsCRP |            |              |                 |                     |                |





Raw Stool Microbiome Data

| <b>LogTransform of hsCRP for stool vs. non-stool</b> |               |  |                  |                 |
|------------------------------------------------------|---------------|--|------------------|-----------------|
| <b>SubjectID</b>                                     | Stool - hsCRP |  | <b>SubjectID</b> | Non-stool hsCRP |
| Subject 1                                            | 0.812913357   |  | Subject 28       | 0.949390007     |
| Subject 2                                            | 0.301029996   |  | Subject 29       | 0.963787827     |
| Subject 3                                            | 0.322219295   |  | Subject 30       | 0.963787827     |
| Subject 4                                            | 0.414973348   |  | Subject 31       | 0.633468456     |
| Subject 5                                            | 0.568201724   |  | Subject 32       | 0.612783857     |
| Subject 6                                            | 0.633468456   |  | Subject 33       | 1.204119983     |
| Subject 7                                            | 1.161368002   |  | Subject 34       | 0.477121255     |
| Subject 8                                            | 1.029383778   |  | Subject 35       | 0.491361694     |
| Subject 9                                            | 0.462397998   |  | Subject 36       | 1.045322979     |
| Subject 10                                           | 0.322219295   |  | Subject 37       | 0.77815125      |
| Subject 11                                           | 1.540329475   |  | Subject 38       | 0.806179974     |
| Subject 12                                           | 1.10720997    |  | Subject 39       | 1.201397124     |
| Subject 13                                           | 0.908485019   |  | Subject 40       | 0.544068044     |
| Subject 14                                           | 0.857332496   |  |                  |                 |
| Subject 15                                           | 0.505149978   |  |                  |                 |
| Subject 16                                           | 1.222716471   |  |                  |                 |
| Subject 17                                           | 0.491361694   |  |                  |                 |
| Subject 18                                           | 0.633468456   |  |                  |                 |
| Subject 19                                           | 0.568201724   |  |                  |                 |
| Subject 20                                           | 0.838849091   |  |                  |                 |
| Subject 21                                           | 0.544068044   |  |                  |                 |
| Subject 22                                           | 1.079181246   |  |                  |                 |
| Subject 23                                           | 0.838849091   |  |                  |                 |
| Subject 24                                           | 0.69019608    |  |                  |                 |
| Subject 25                                           | 0.880813592   |  |                  |                 |
| Subject 26                                           | 0.716003344   |  |                  |                 |
| Subject 27                                           | 0.531478917   |  |                  |                 |

Sequence Count Table

|                | <b>Phylum</b>  | <b>Class</b>   | <b>Order</b>      | <b>Family</b>      |
|----------------|----------------|----------------|-------------------|--------------------|
| <b>seq455</b>  | Actinobacteria | Actinobacteria | Actinomycetales   | Actinomycetaceae   |
| <b>seq1294</b> | Actinobacteria | Actinobacteria | Actinomycetales   | Actinomycetaceae   |
| <b>seq1460</b> | Actinobacteria | Actinobacteria | Actinomycetales   | Actinomycetaceae   |
| <b>seq1552</b> | Actinobacteria | Actinobacteria | Actinomycetales   | Actinomycetaceae   |
| <b>seq1834</b> | Actinobacteria | Actinobacteria | Actinomycetales   | Actinomycetaceae   |
| <b>seq1573</b> | Actinobacteria | Actinobacteria | Actinomycetales   | Actinomycetaceae   |
| <b>seq1354</b> | Actinobacteria | Coriobacteriia | Coriobacteriales  | Atopobiaceae       |
| <b>seq1589</b> | Actinobacteria | Coriobacteriia | Coriobacteriales  | Atopobiaceae       |
| <b>seq1761</b> | Actinobacteria | Coriobacteriia | Coriobacteriales  | Atopobiaceae       |
| <b>seq1848</b> | Actinobacteria | Coriobacteriia | Coriobacteriales  | Atopobiaceae       |
| <b>seq530</b>  | Actinobacteria | Coriobacteriia | Coriobacteriales  | Atopobiaceae       |
| <b>seq507</b>  | Actinobacteria | Coriobacteriia | Coriobacteriales  | Atopobiaceae       |
| <b>seq1769</b> | Actinobacteria | Coriobacteriia | Coriobacteriales  | Atopobiaceae       |
| <b>seq1216</b> | Actinobacteria | Actinobacteria | Bifidobacteriales | Bifidobacteriaceae |
| <b>seq15</b>   | Actinobacteria | Actinobacteria | Bifidobacteriales | Bifidobacteriaceae |
| <b>seq35</b>   | Actinobacteria | Actinobacteria | Bifidobacteriales | Bifidobacteriaceae |
| <b>seq53</b>   | Actinobacteria | Actinobacteria | Bifidobacteriales | Bifidobacteriaceae |
| <b>seq93</b>   | Actinobacteria | Actinobacteria | Bifidobacteriales | Bifidobacteriaceae |
| <b>seq313</b>  | Actinobacteria | Actinobacteria | Bifidobacteriales | Bifidobacteriaceae |
| <b>seq368</b>  | Actinobacteria | Actinobacteria | Bifidobacteriales | Bifidobacteriaceae |
| <b>seq765</b>  | Actinobacteria | Actinobacteria | Bifidobacteriales | Bifidobacteriaceae |
| <b>seq802</b>  | Actinobacteria | Actinobacteria | Bifidobacteriales | Bifidobacteriaceae |
| <b>seq833</b>  | Actinobacteria | Actinobacteria | Bifidobacteriales | Bifidobacteriaceae |
| <b>seq890</b>  | Actinobacteria | Actinobacteria | Bifidobacteriales | Bifidobacteriaceae |
| <b>seq1336</b> | Actinobacteria | Actinobacteria | Bifidobacteriales | Bifidobacteriaceae |
| <b>seq4</b>    | Actinobacteria | Coriobacteriia | Coriobacteriales  | Coriobacteriaceae  |
| <b>seq131</b>  | Actinobacteria | Coriobacteriia | Coriobacteriales  | Coriobacteriaceae  |
| <b>seq286</b>  | Actinobacteria | Coriobacteriia | Coriobacteriales  | Coriobacteriaceae  |
| <b>seq391</b>  | Actinobacteria | Coriobacteriia | Coriobacteriales  | Coriobacteriaceae  |
| <b>seq590</b>  | Actinobacteria | Coriobacteriia | Coriobacteriales  | Coriobacteriaceae  |
| <b>seq808</b>  | Actinobacteria | Coriobacteriia | Coriobacteriales  | Coriobacteriaceae  |
| <b>seq1166</b> | Actinobacteria | Coriobacteriia | Coriobacteriales  | Coriobacteriaceae  |

Sequence Count Table

|                | <b>Phylum</b>  | <b>Class</b>   | <b>Genus</b>    | <b>Species</b>     |
|----------------|----------------|----------------|-----------------|--------------------|
| <b>seq455</b>  | Actinobacteria | Actinobacteria | Actinomyces     | odontolyticus      |
| <b>seq1294</b> | Actinobacteria | Actinobacteria | Actinomyces     | graevenitzii       |
| <b>seq1460</b> | Actinobacteria | Actinobacteria | Actinomyces     |                    |
| <b>seq1552</b> | Actinobacteria | Actinobacteria | Actinomyces     | odontolyticus      |
| <b>seq1834</b> | Actinobacteria | Actinobacteria | F0332           |                    |
| <b>seq1573</b> | Actinobacteria | Actinobacteria | Mobiluncus      | curtisii           |
| <b>seq1354</b> | Actinobacteria | Coriobacteriia | Atopobium       | parvulum           |
| <b>seq1589</b> | Actinobacteria | Coriobacteriia | Atopobium       | vaginae            |
| <b>seq1761</b> | Actinobacteria | Coriobacteriia | Atopobium       |                    |
| <b>seq1848</b> | Actinobacteria | Coriobacteriia | Atopobium       | deltae             |
| <b>seq530</b>  | Actinobacteria | Coriobacteriia | Libanicoccus    |                    |
| <b>seq507</b>  | Actinobacteria | Coriobacteriia | Olsenella       |                    |
| <b>seq1769</b> | Actinobacteria | Coriobacteriia | Olsenella       |                    |
| <b>seq1216</b> | Actinobacteria | Actinobacteria | Alloscardovia   | omnicolens         |
| <b>seq15</b>   | Actinobacteria | Actinobacteria | Bifidobacterium |                    |
| <b>seq35</b>   | Actinobacteria | Actinobacteria | Bifidobacterium |                    |
| <b>seq53</b>   | Actinobacteria | Actinobacteria | Bifidobacterium |                    |
| <b>seq93</b>   | Actinobacteria | Actinobacteria | Bifidobacterium | bifidum            |
| <b>seq313</b>  | Actinobacteria | Actinobacteria | Bifidobacterium |                    |
| <b>seq368</b>  | Actinobacteria | Actinobacteria | Bifidobacterium | longum             |
| <b>seq765</b>  | Actinobacteria | Actinobacteria | Bifidobacterium | animalis           |
| <b>seq802</b>  | Actinobacteria | Actinobacteria | Bifidobacterium |                    |
| <b>seq833</b>  | Actinobacteria | Actinobacteria | Bifidobacterium |                    |
| <b>seq890</b>  | Actinobacteria | Actinobacteria | Gardnerella     | vaginalis          |
| <b>seq1336</b> | Actinobacteria | Actinobacteria | Gardnerella     | vaginalis          |
| <b>seq4</b>    | Actinobacteria | Coriobacteriia | Collinsella     | aerofaciens        |
| <b>seq131</b>  | Actinobacteria | Coriobacteriia | Collinsella     |                    |
| <b>seq286</b>  | Actinobacteria | Coriobacteriia | Collinsella     |                    |
| <b>seq391</b>  | Actinobacteria | Coriobacteriia | Collinsella     | bouchesdurhonensis |
| <b>seq590</b>  | Actinobacteria | Coriobacteriia | Collinsella     | tanakaei           |
| <b>seq808</b>  | Actinobacteria | Coriobacteriia | Collinsella     |                    |
| <b>seq1166</b> | Actinobacteria | Coriobacteriia | Collinsella     | phocaeensis        |

Sequence Count Table

|                | <b>Phylum</b>  | <b>Class</b>   | <b>Subject34WK0</b> | <b>Subject34WK12</b> | <b>Subject16WK0</b> | <b>Subject16WK12</b> |
|----------------|----------------|----------------|---------------------|----------------------|---------------------|----------------------|
| <b>seq455</b>  | Actinobacteria | Actinobacteria | 55                  | 152                  | 0                   | 0                    |
| <b>seq1294</b> | Actinobacteria | Actinobacteria | 0                   | 34                   | 0                   | 0                    |
| <b>seq1460</b> | Actinobacteria | Actinobacteria | 0                   | 0                    | 0                   | 0                    |
| <b>seq1552</b> | Actinobacteria | Actinobacteria | 0                   | 0                    | 0                   | 0                    |
| <b>seq1834</b> | Actinobacteria | Actinobacteria | 0                   | 0                    | 0                   | 0                    |
| <b>seq1573</b> | Actinobacteria | Actinobacteria | 0                   | 0                    | 0                   | 0                    |
| <b>seq1354</b> | Actinobacteria | Coriobacteriia | 0                   | 14                   | 0                   | 0                    |
| <b>seq1589</b> | Actinobacteria | Coriobacteriia | 0                   | 0                    | 0                   | 0                    |
| <b>seq1761</b> | Actinobacteria | Coriobacteriia | 0                   | 0                    | 0                   | 0                    |
| <b>seq1848</b> | Actinobacteria | Coriobacteriia | 0                   | 0                    | 0                   | 0                    |
| <b>seq530</b>  | Actinobacteria | Coriobacteriia | 0                   | 0                    | 235                 | 463                  |
| <b>seq507</b>  | Actinobacteria | Coriobacteriia | 0                   | 171                  | 0                   | 0                    |
| <b>seq1769</b> | Actinobacteria | Coriobacteriia | 0                   | 0                    | 0                   | 0                    |
| <b>seq1216</b> | Actinobacteria | Actinobacteria | 0                   | 74                   | 0                   | 0                    |
| <b>seq15</b>   | Actinobacteria | Actinobacteria | 0                   | 117                  | 335                 | 3050                 |
| <b>seq35</b>   | Actinobacteria | Actinobacteria | 180                 | 464                  | 0                   | 168                  |
| <b>seq53</b>   | Actinobacteria | Actinobacteria | 0                   | 0                    | 0                   | 0                    |
| <b>seq93</b>   | Actinobacteria | Actinobacteria | 129                 | 98                   | 0                   | 0                    |
| <b>seq313</b>  | Actinobacteria | Actinobacteria | 0                   | 0                    | 186                 | 1852                 |
| <b>seq368</b>  | Actinobacteria | Actinobacteria | 0                   | 0                    | 0                   | 0                    |
| <b>seq765</b>  | Actinobacteria | Actinobacteria | 0                   | 0                    | 0                   | 0                    |
| <b>seq802</b>  | Actinobacteria | Actinobacteria | 65                  | 109                  | 0                   | 0                    |
| <b>seq833</b>  | Actinobacteria | Actinobacteria | 0                   | 0                    | 0                   | 0                    |
| <b>seq890</b>  | Actinobacteria | Actinobacteria | 0                   | 0                    | 0                   | 0                    |
| <b>seq1336</b> | Actinobacteria | Actinobacteria | 0                   | 0                    | 0                   | 0                    |
| <b>seq4</b>    | Actinobacteria | Coriobacteriia | 0                   | 16790                | 3199                | 5476                 |
| <b>seq131</b>  | Actinobacteria | Coriobacteriia | 0                   | 0                    | 0                   | 0                    |
| <b>seq286</b>  | Actinobacteria | Coriobacteriia | 0                   | 0                    | 0                   | 0                    |
| <b>seq391</b>  | Actinobacteria | Coriobacteriia | 0                   | 0                    | 0                   | 0                    |
| <b>seq590</b>  | Actinobacteria | Coriobacteriia | 0                   | 0                    | 262                 | 292                  |
| <b>seq808</b>  | Actinobacteria | Coriobacteriia | 0                   | 0                    | 0                   | 0                    |
| <b>seq1166</b> | Actinobacteria | Coriobacteriia | 0                   | 0                    | 0                   | 0                    |

Sequence Count Table

|                | <b>Phylum</b>  | <b>Class</b>   | <b>Subject17WK0</b> | <b>Subject17WK12</b> | <b>Subject1WK0</b> | <b>Subject1WK12</b> |
|----------------|----------------|----------------|---------------------|----------------------|--------------------|---------------------|
| <b>seq455</b>  | Actinobacteria | Actinobacteria | 0                   | 0                    | 0                  | 11                  |
| <b>seq1294</b> | Actinobacteria | Actinobacteria | 0                   | 0                    | 0                  | 0                   |
| <b>seq1460</b> | Actinobacteria | Actinobacteria | 0                   | 0                    | 0                  | 0                   |
| <b>seq1552</b> | Actinobacteria | Actinobacteria | 0                   | 0                    | 11                 | 0                   |
| <b>seq1834</b> | Actinobacteria | Actinobacteria | 0                   | 0                    | 0                  | 0                   |
| <b>seq1573</b> | Actinobacteria | Actinobacteria | 0                   | 0                    | 0                  | 0                   |
| <b>seq1354</b> | Actinobacteria | Coriobacteriia | 0                   | 0                    | 0                  | 0                   |
| <b>seq1589</b> | Actinobacteria | Coriobacteriia | 0                   | 0                    | 0                  | 0                   |
| <b>seq1761</b> | Actinobacteria | Coriobacteriia | 0                   | 0                    | 0                  | 0                   |
| <b>seq1848</b> | Actinobacteria | Coriobacteriia | 0                   | 0                    | 0                  | 0                   |
| <b>seq530</b>  | Actinobacteria | Coriobacteriia | 0                   | 0                    | 0                  | 0                   |
| <b>seq507</b>  | Actinobacteria | Coriobacteriia | 0                   | 0                    | 0                  | 0                   |
| <b>seq1769</b> | Actinobacteria | Coriobacteriia | 0                   | 0                    | 0                  | 0                   |
| <b>seq1216</b> | Actinobacteria | Actinobacteria | 0                   | 0                    | 0                  | 0                   |
| <b>seq15</b>   | Actinobacteria | Actinobacteria | 0                   | 0                    | 1259               | 1375                |
| <b>seq35</b>   | Actinobacteria | Actinobacteria | 0                   | 0                    | 202                | 192                 |
| <b>seq53</b>   | Actinobacteria | Actinobacteria | 0                   | 0                    | 0                  | 0                   |
| <b>seq93</b>   | Actinobacteria | Actinobacteria | 0                   | 0                    | 0                  | 0                   |
| <b>seq313</b>  | Actinobacteria | Actinobacteria | 0                   | 0                    | 0                  | 0                   |
| <b>seq368</b>  | Actinobacteria | Actinobacteria | 0                   | 0                    | 0                  | 0                   |
| <b>seq765</b>  | Actinobacteria | Actinobacteria | 0                   | 0                    | 0                  | 0                   |
| <b>seq802</b>  | Actinobacteria | Actinobacteria | 0                   | 0                    | 0                  | 0                   |
| <b>seq833</b>  | Actinobacteria | Actinobacteria | 0                   | 0                    | 0                  | 0                   |
| <b>seq890</b>  | Actinobacteria | Actinobacteria | 0                   | 0                    | 0                  | 0                   |
| <b>seq1336</b> | Actinobacteria | Actinobacteria | 0                   | 0                    | 0                  | 0                   |
| <b>seq4</b>    | Actinobacteria | Coriobacteriia | 8152                | 3699                 | 1655               | 1846                |
| <b>seq131</b>  | Actinobacteria | Coriobacteriia | 0                   | 0                    | 0                  | 0                   |
| <b>seq286</b>  | Actinobacteria | Coriobacteriia | 0                   | 0                    | 0                  | 0                   |
| <b>seq391</b>  | Actinobacteria | Coriobacteriia | 0                   | 0                    | 0                  | 0                   |
| <b>seq590</b>  | Actinobacteria | Coriobacteriia | 0                   | 0                    | 0                  | 0                   |
| <b>seq808</b>  | Actinobacteria | Coriobacteriia | 0                   | 0                    | 0                  | 0                   |
| <b>seq1166</b> | Actinobacteria | Coriobacteriia | 0                   | 0                    | 0                  | 0                   |

Sequence Count Table

|                | <b>Phylum</b>  | <b>Class</b>   | <b>Subject2WK0</b> | <b>Subject2WK12</b> | <b>Subject3WK0</b> | <b>Subject3WK12</b> |
|----------------|----------------|----------------|--------------------|---------------------|--------------------|---------------------|
| <b>seq455</b>  | Actinobacteria | Actinobacteria | 19                 | 19                  | 34                 | 16                  |
| <b>seq1294</b> | Actinobacteria | Actinobacteria | 0                  | 0                   | 11                 | 0                   |
| <b>seq1460</b> | Actinobacteria | Actinobacteria | 0                  | 0                   | 0                  | 0                   |
| <b>seq1552</b> | Actinobacteria | Actinobacteria | 0                  | 0                   | 0                  | 0                   |
| <b>seq1834</b> | Actinobacteria | Actinobacteria | 0                  | 0                   | 0                  | 0                   |
| <b>seq1573</b> | Actinobacteria | Actinobacteria | 0                  | 0                   | 0                  | 0                   |
| <b>seq1354</b> | Actinobacteria | Coriobacteriia | 0                  | 0                   | 0                  | 0                   |
| <b>seq1589</b> | Actinobacteria | Coriobacteriia | 0                  | 17                  | 0                  | 0                   |
| <b>seq1761</b> | Actinobacteria | Coriobacteriia | 0                  | 0                   | 0                  | 0                   |
| <b>seq1848</b> | Actinobacteria | Coriobacteriia | 0                  | 0                   | 0                  | 0                   |
| <b>seq530</b>  | Actinobacteria | Coriobacteriia | 0                  | 0                   | 0                  | 0                   |
| <b>seq507</b>  | Actinobacteria | Coriobacteriia | 0                  | 0                   | 0                  | 0                   |
| <b>seq1769</b> | Actinobacteria | Coriobacteriia | 0                  | 0                   | 0                  | 0                   |
| <b>seq1216</b> | Actinobacteria | Actinobacteria | 0                  | 0                   | 0                  | 0                   |
| <b>seq15</b>   | Actinobacteria | Actinobacteria | 4643               | 4212                | 0                  | 0                   |
| <b>seq35</b>   | Actinobacteria | Actinobacteria | 0                  | 0                   | 0                  | 0                   |
| <b>seq53</b>   | Actinobacteria | Actinobacteria | 0                  | 0                   | 0                  | 0                   |
| <b>seq93</b>   | Actinobacteria | Actinobacteria | 0                  | 0                   | 0                  | 0                   |
| <b>seq313</b>  | Actinobacteria | Actinobacteria | 0                  | 0                   | 0                  | 0                   |
| <b>seq368</b>  | Actinobacteria | Actinobacteria | 0                  | 0                   | 0                  | 0                   |
| <b>seq765</b>  | Actinobacteria | Actinobacteria | 41                 | 0                   | 0                  | 0                   |
| <b>seq802</b>  | Actinobacteria | Actinobacteria | 0                  | 0                   | 0                  | 0                   |
| <b>seq833</b>  | Actinobacteria | Actinobacteria | 0                  | 0                   | 0                  | 0                   |
| <b>seq890</b>  | Actinobacteria | Actinobacteria | 0                  | 57                  | 0                  | 0                   |
| <b>seq1336</b> | Actinobacteria | Actinobacteria | 0                  | 0                   | 0                  | 0                   |
| <b>seq4</b>    | Actinobacteria | Coriobacteriia | 3108               | 2804                | 0                  | 0                   |
| <b>seq131</b>  | Actinobacteria | Coriobacteriia | 0                  | 0                   | 0                  | 0                   |
| <b>seq286</b>  | Actinobacteria | Coriobacteriia | 0                  | 0                   | 0                  | 0                   |
| <b>seq391</b>  | Actinobacteria | Coriobacteriia | 0                  | 0                   | 0                  | 0                   |
| <b>seq590</b>  | Actinobacteria | Coriobacteriia | 0                  | 0                   | 0                  | 0                   |
| <b>seq808</b>  | Actinobacteria | Coriobacteriia | 0                  | 264                 | 0                  | 0                   |
| <b>seq1166</b> | Actinobacteria | Coriobacteriia | 0                  | 0                   | 0                  | 0                   |

Sequence Count Table

|                | <b>Phylum</b>  | <b>Class</b>   | <b>Subject4WK0</b> | <b>Subject4WK12</b> | <b>Subject5WK0</b> | <b>Subject5WK12</b> |
|----------------|----------------|----------------|--------------------|---------------------|--------------------|---------------------|
| <b>seq455</b>  | Actinobacteria | Actinobacteria | 0                  | 30                  | 11                 | 19                  |
| <b>seq1294</b> | Actinobacteria | Actinobacteria | 0                  | 0                   | 0                  | 0                   |
| <b>seq1460</b> | Actinobacteria | Actinobacteria | 0                  | 0                   | 0                  | 0                   |
| <b>seq1552</b> | Actinobacteria | Actinobacteria | 0                  | 0                   | 0                  | 0                   |
| <b>seq1834</b> | Actinobacteria | Actinobacteria | 0                  | 0                   | 0                  | 0                   |
| <b>seq1573</b> | Actinobacteria | Actinobacteria | 0                  | 0                   | 0                  | 0                   |
| <b>seq1354</b> | Actinobacteria | Coriobacteriia | 0                  | 0                   | 0                  | 0                   |
| <b>seq1589</b> | Actinobacteria | Coriobacteriia | 0                  | 0                   | 0                  | 0                   |
| <b>seq1761</b> | Actinobacteria | Coriobacteriia | 0                  | 0                   | 0                  | 0                   |
| <b>seq1848</b> | Actinobacteria | Coriobacteriia | 0                  | 0                   | 0                  | 5                   |
| <b>seq530</b>  | Actinobacteria | Coriobacteriia | 0                  | 0                   | 0                  | 0                   |
| <b>seq507</b>  | Actinobacteria | Coriobacteriia | 0                  | 0                   | 0                  | 0                   |
| <b>seq1769</b> | Actinobacteria | Coriobacteriia | 0                  | 0                   | 0                  | 0                   |
| <b>seq1216</b> | Actinobacteria | Actinobacteria | 0                  | 0                   | 0                  | 0                   |
| <b>seq15</b>   | Actinobacteria | Actinobacteria | 0                  | 0                   | 0                  | 0                   |
| <b>seq35</b>   | Actinobacteria | Actinobacteria | 0                  | 0                   | 4112               | 1939                |
| <b>seq53</b>   | Actinobacteria | Actinobacteria | 0                  | 0                   | 0                  | 0                   |
| <b>seq93</b>   | Actinobacteria | Actinobacteria | 766                | 283                 | 1011               | 63                  |
| <b>seq313</b>  | Actinobacteria | Actinobacteria | 0                  | 0                   | 0                  | 0                   |
| <b>seq368</b>  | Actinobacteria | Actinobacteria | 0                  | 0                   | 929                | 529                 |
| <b>seq765</b>  | Actinobacteria | Actinobacteria | 0                  | 0                   | 0                  | 0                   |
| <b>seq802</b>  | Actinobacteria | Actinobacteria | 0                  | 0                   | 0                  | 0                   |
| <b>seq833</b>  | Actinobacteria | Actinobacteria | 0                  | 0                   | 0                  | 0                   |
| <b>seq890</b>  | Actinobacteria | Actinobacteria | 0                  | 0                   | 0                  | 0                   |
| <b>seq1336</b> | Actinobacteria | Actinobacteria | 0                  | 0                   | 0                  | 0                   |
| <b>seq4</b>    | Actinobacteria | Coriobacteriia | 5758               | 7594                | 0                  | 0                   |
| <b>seq131</b>  | Actinobacteria | Coriobacteriia | 0                  | 0                   | 0                  | 0                   |
| <b>seq286</b>  | Actinobacteria | Coriobacteriia | 0                  | 0                   | 0                  | 0                   |
| <b>seq391</b>  | Actinobacteria | Coriobacteriia | 0                  | 0                   | 0                  | 0                   |
| <b>seq590</b>  | Actinobacteria | Coriobacteriia | 0                  | 0                   | 0                  | 0                   |
| <b>seq808</b>  | Actinobacteria | Coriobacteriia | 0                  | 0                   | 0                  | 0                   |
| <b>seq1166</b> | Actinobacteria | Coriobacteriia | 0                  | 0                   | 0                  | 0                   |

Sequence Count Table

|                | <b>Phylum</b>  | <b>Class</b>   | <b>Subject6WK0</b> | <b>Subject6WK12</b> | <b>Subject18WK0</b> | <b>Subject18WK12</b> |
|----------------|----------------|----------------|--------------------|---------------------|---------------------|----------------------|
| <b>seq455</b>  | Actinobacteria | Actinobacteria | 0                  | 0                   | 0                   | 0                    |
| <b>seq1294</b> | Actinobacteria | Actinobacteria | 0                  | 0                   | 0                   | 0                    |
| <b>seq1460</b> | Actinobacteria | Actinobacteria | 12                 | 0                   | 7                   | 0                    |
| <b>seq1552</b> | Actinobacteria | Actinobacteria | 0                  | 0                   | 0                   | 0                    |
| <b>seq1834</b> | Actinobacteria | Actinobacteria | 0                  | 0                   | 0                   | 0                    |
| <b>seq1573</b> | Actinobacteria | Actinobacteria | 0                  | 0                   | 0                   | 0                    |
| <b>seq1354</b> | Actinobacteria | Coriobacteriia | 0                  | 0                   | 0                   | 0                    |
| <b>seq1589</b> | Actinobacteria | Coriobacteriia | 0                  | 3                   | 0                   | 0                    |
| <b>seq1761</b> | Actinobacteria | Coriobacteriia | 0                  | 0                   | 0                   | 0                    |
| <b>seq1848</b> | Actinobacteria | Coriobacteriia | 0                  | 0                   | 0                   | 0                    |
| <b>seq530</b>  | Actinobacteria | Coriobacteriia | 0                  | 0                   | 0                   | 0                    |
| <b>seq507</b>  | Actinobacteria | Coriobacteriia | 0                  | 0                   | 0                   | 0                    |
| <b>seq1769</b> | Actinobacteria | Coriobacteriia | 0                  | 0                   | 0                   | 0                    |
| <b>seq1216</b> | Actinobacteria | Actinobacteria | 0                  | 0                   | 0                   | 0                    |
| <b>seq15</b>   | Actinobacteria | Actinobacteria | 1670               | 351                 | 0                   | 0                    |
| <b>seq35</b>   | Actinobacteria | Actinobacteria | 0                  | 0                   | 3586                | 4556                 |
| <b>seq53</b>   | Actinobacteria | Actinobacteria | 310                | 212                 | 0                   | 0                    |
| <b>seq93</b>   | Actinobacteria | Actinobacteria | 0                  | 98                  | 0                   | 0                    |
| <b>seq313</b>  | Actinobacteria | Actinobacteria | 0                  | 0                   | 0                   | 0                    |
| <b>seq368</b>  | Actinobacteria | Actinobacteria | 0                  | 0                   | 0                   | 0                    |
| <b>seq765</b>  | Actinobacteria | Actinobacteria | 0                  | 0                   | 0                   | 0                    |
| <b>seq802</b>  | Actinobacteria | Actinobacteria | 0                  | 0                   | 0                   | 0                    |
| <b>seq833</b>  | Actinobacteria | Actinobacteria | 0                  | 0                   | 0                   | 0                    |
| <b>seq890</b>  | Actinobacteria | Actinobacteria | 0                  | 0                   | 0                   | 0                    |
| <b>seq1336</b> | Actinobacteria | Actinobacteria | 0                  | 0                   | 0                   | 0                    |
| <b>seq4</b>    | Actinobacteria | Coriobacteriia | 5220               | 9406                | 12592               | 5008                 |
| <b>seq131</b>  | Actinobacteria | Coriobacteriia | 0                  | 0                   | 153                 | 9                    |
| <b>seq286</b>  | Actinobacteria | Coriobacteriia | 0                  | 0                   | 0                   | 0                    |
| <b>seq391</b>  | Actinobacteria | Coriobacteriia | 0                  | 0                   | 0                   | 0                    |
| <b>seq590</b>  | Actinobacteria | Coriobacteriia | 0                  | 0                   | 0                   | 0                    |
| <b>seq808</b>  | Actinobacteria | Coriobacteriia | 0                  | 0                   | 0                   | 0                    |
| <b>seq1166</b> | Actinobacteria | Coriobacteriia | 0                  | 0                   | 0                   | 0                    |



Sequence Count Table

|                | <b>Phylum</b>  | <b>Class</b>   | <b>Subject19WK0</b> | <b>Subject19WK12</b> | <b>Subject20WK0</b> | <b>Subject20WK12</b> |
|----------------|----------------|----------------|---------------------|----------------------|---------------------|----------------------|
| <b>seq455</b>  | Actinobacteria | Actinobacteria | 12                  | 12                   | 18                  | 106                  |
| <b>seq1294</b> | Actinobacteria | Actinobacteria | 0                   | 0                    | 0                   | 0                    |
| <b>seq1460</b> | Actinobacteria | Actinobacteria | 0                   | 0                    | 0                   | 14                   |
| <b>seq1552</b> | Actinobacteria | Actinobacteria | 0                   | 0                    | 0                   | 0                    |
| <b>seq1834</b> | Actinobacteria | Actinobacteria | 0                   | 0                    | 0                   | 0                    |
| <b>seq1573</b> | Actinobacteria | Actinobacteria | 0                   | 0                    | 0                   | 0                    |
| <b>seq1354</b> | Actinobacteria | Coriobacteriia | 0                   | 0                    | 0                   | 0                    |
| <b>seq1589</b> | Actinobacteria | Coriobacteriia | 0                   | 0                    | 0                   | 0                    |
| <b>seq1761</b> | Actinobacteria | Coriobacteriia | 0                   | 0                    | 0                   | 0                    |
| <b>seq1848</b> | Actinobacteria | Coriobacteriia | 0                   | 0                    | 0                   | 0                    |
| <b>seq530</b>  | Actinobacteria | Coriobacteriia | 0                   | 0                    | 0                   | 0                    |
| <b>seq507</b>  | Actinobacteria | Coriobacteriia | 0                   | 0                    | 128                 | 174                  |
| <b>seq1769</b> | Actinobacteria | Coriobacteriia | 0                   | 0                    | 0                   | 9                    |
| <b>seq1216</b> | Actinobacteria | Actinobacteria | 0                   | 0                    | 0                   | 0                    |
| <b>seq15</b>   | Actinobacteria | Actinobacteria | 0                   | 3835                 | 94                  | 152                  |
| <b>seq35</b>   | Actinobacteria | Actinobacteria | 0                   | 0                    | 0                   | 0                    |
| <b>seq53</b>   | Actinobacteria | Actinobacteria | 0                   | 0                    | 0                   | 0                    |
| <b>seq93</b>   | Actinobacteria | Actinobacteria | 0                   | 0                    | 0                   | 0                    |
| <b>seq313</b>  | Actinobacteria | Actinobacteria | 0                   | 0                    | 0                   | 0                    |
| <b>seq368</b>  | Actinobacteria | Actinobacteria | 0                   | 0                    | 0                   | 0                    |
| <b>seq765</b>  | Actinobacteria | Actinobacteria | 0                   | 0                    | 0                   | 0                    |
| <b>seq802</b>  | Actinobacteria | Actinobacteria | 0                   | 0                    | 0                   | 0                    |
| <b>seq833</b>  | Actinobacteria | Actinobacteria | 0                   | 0                    | 0                   | 0                    |
| <b>seq890</b>  | Actinobacteria | Actinobacteria | 0                   | 0                    | 0                   | 0                    |
| <b>seq1336</b> | Actinobacteria | Actinobacteria | 0                   | 0                    | 0                   | 0                    |
| <b>seq4</b>    | Actinobacteria | Coriobacteriia | 4464                | 6084                 | 1384                | 3088                 |
| <b>seq131</b>  | Actinobacteria | Coriobacteriia | 158                 | 100                  | 0                   | 0                    |
| <b>seq286</b>  | Actinobacteria | Coriobacteriia | 0                   | 0                    | 0                   | 0                    |
| <b>seq391</b>  | Actinobacteria | Coriobacteriia | 0                   | 0                    | 78                  | 76                   |
| <b>seq590</b>  | Actinobacteria | Coriobacteriia | 0                   | 0                    | 0                   | 0                    |
| <b>seq808</b>  | Actinobacteria | Coriobacteriia | 0                   | 0                    | 0                   | 0                    |
| <b>seq1166</b> | Actinobacteria | Coriobacteriia | 0                   | 0                    | 0                   | 0                    |

Sequence Count Table

|                | <b>Phylum</b>  | <b>Class</b>   | <b>Subject7WK0</b> | <b>Subject7WK12</b> | <b>Subject21WK0</b> | <b>Subject21WK12</b> |
|----------------|----------------|----------------|--------------------|---------------------|---------------------|----------------------|
| <b>seq455</b>  | Actinobacteria | Actinobacteria | 9                  | 0                   | 20                  | 0                    |
| <b>seq1294</b> | Actinobacteria | Actinobacteria | 0                  | 0                   | 0                   | 0                    |
| <b>seq1460</b> | Actinobacteria | Actinobacteria | 0                  | 0                   | 0                   | 0                    |
| <b>seq1552</b> | Actinobacteria | Actinobacteria | 0                  | 0                   | 0                   | 0                    |
| <b>seq1834</b> | Actinobacteria | Actinobacteria | 0                  | 0                   | 0                   | 0                    |
| <b>seq1573</b> | Actinobacteria | Actinobacteria | 0                  | 0                   | 0                   | 0                    |
| <b>seq1354</b> | Actinobacteria | Coriobacteriia | 0                  | 0                   | 0                   | 0                    |
| <b>seq1589</b> | Actinobacteria | Coriobacteriia | 0                  | 0                   | 0                   | 0                    |
| <b>seq1761</b> | Actinobacteria | Coriobacteriia | 0                  | 0                   | 0                   | 0                    |
| <b>seq1848</b> | Actinobacteria | Coriobacteriia | 0                  | 0                   | 0                   | 0                    |
| <b>seq530</b>  | Actinobacteria | Coriobacteriia | 0                  | 0                   | 0                   | 0                    |
| <b>seq507</b>  | Actinobacteria | Coriobacteriia | 0                  | 0                   | 0                   | 0                    |
| <b>seq1769</b> | Actinobacteria | Coriobacteriia | 0                  | 0                   | 0                   | 0                    |
| <b>seq1216</b> | Actinobacteria | Actinobacteria | 0                  | 0                   | 0                   | 0                    |
| <b>seq15</b>   | Actinobacteria | Actinobacteria | 0                  | 0                   | 2520                | 209                  |
| <b>seq35</b>   | Actinobacteria | Actinobacteria | 0                  | 0                   | 2056                | 9347                 |
| <b>seq53</b>   | Actinobacteria | Actinobacteria | 7842               | 3826                | 1390                | 0                    |
| <b>seq93</b>   | Actinobacteria | Actinobacteria | 1528               | 899                 | 300                 | 1131                 |
| <b>seq313</b>  | Actinobacteria | Actinobacteria | 0                  | 0                   | 0                   | 0                    |
| <b>seq368</b>  | Actinobacteria | Actinobacteria | 0                  | 0                   | 0                   | 0                    |
| <b>seq765</b>  | Actinobacteria | Actinobacteria | 0                  | 0                   | 0                   | 0                    |
| <b>seq802</b>  | Actinobacteria | Actinobacteria | 0                  | 0                   | 56                  | 0                    |
| <b>seq833</b>  | Actinobacteria | Actinobacteria | 0                  | 0                   | 0                   | 0                    |
| <b>seq890</b>  | Actinobacteria | Actinobacteria | 0                  | 0                   | 0                   | 0                    |
| <b>seq1336</b> | Actinobacteria | Actinobacteria | 0                  | 0                   | 0                   | 0                    |
| <b>seq4</b>    | Actinobacteria | Coriobacteriia | 0                  | 4003                | 0                   | 0                    |
| <b>seq131</b>  | Actinobacteria | Coriobacteriia | 0                  | 0                   | 0                   | 0                    |
| <b>seq286</b>  | Actinobacteria | Coriobacteriia | 2011               | 484                 | 0                   | 0                    |
| <b>seq391</b>  | Actinobacteria | Coriobacteriia | 393                | 126                 | 0                   | 0                    |
| <b>seq590</b>  | Actinobacteria | Coriobacteriia | 0                  | 0                   | 0                   | 0                    |
| <b>seq808</b>  | Actinobacteria | Coriobacteriia | 0                  | 0                   | 0                   | 0                    |
| <b>seq1166</b> | Actinobacteria | Coriobacteriia | 0                  | 0                   | 0                   | 0                    |

Sequence Count Table

|                | <b>Phylum</b>  | <b>Class</b>   | <b>Subject8WK0</b> | <b>Subject8WK12</b> | <b>Subject9WK0</b> | <b>Subject9WK12</b> |
|----------------|----------------|----------------|--------------------|---------------------|--------------------|---------------------|
| <b>seq455</b>  | Actinobacteria | Actinobacteria | 13                 | 21                  | 13                 | 22                  |
| <b>seq1294</b> | Actinobacteria | Actinobacteria | 0                  | 0                   | 0                  | 0                   |
| <b>seq1460</b> | Actinobacteria | Actinobacteria | 0                  | 0                   | 0                  | 0                   |
| <b>seq1552</b> | Actinobacteria | Actinobacteria | 0                  | 0                   | 0                  | 0                   |
| <b>seq1834</b> | Actinobacteria | Actinobacteria | 0                  | 0                   | 0                  | 0                   |
| <b>seq1573</b> | Actinobacteria | Actinobacteria | 0                  | 0                   | 0                  | 0                   |
| <b>seq1354</b> | Actinobacteria | Coriobacteriia | 0                  | 6                   | 0                  | 14                  |
| <b>seq1589</b> | Actinobacteria | Coriobacteriia | 0                  | 0                   | 0                  | 0                   |
| <b>seq1761</b> | Actinobacteria | Coriobacteriia | 0                  | 0                   | 0                  | 0                   |
| <b>seq1848</b> | Actinobacteria | Coriobacteriia | 0                  | 0                   | 0                  | 0                   |
| <b>seq530</b>  | Actinobacteria | Coriobacteriia | 0                  | 0                   | 0                  | 0                   |
| <b>seq507</b>  | Actinobacteria | Coriobacteriia | 0                  | 0                   | 213                | 82                  |
| <b>seq1769</b> | Actinobacteria | Coriobacteriia | 0                  | 0                   | 0                  | 0                   |
| <b>seq1216</b> | Actinobacteria | Actinobacteria | 0                  | 0                   | 0                  | 0                   |
| <b>seq15</b>   | Actinobacteria | Actinobacteria | 1843               | 1353                | 0                  | 0                   |
| <b>seq35</b>   | Actinobacteria | Actinobacteria | 4415               | 1463                | 0                  | 0                   |
| <b>seq53</b>   | Actinobacteria | Actinobacteria | 533                | 1334                | 0                  | 0                   |
| <b>seq93</b>   | Actinobacteria | Actinobacteria | 0                  | 0                   | 0                  | 0                   |
| <b>seq313</b>  | Actinobacteria | Actinobacteria | 0                  | 0                   | 0                  | 0                   |
| <b>seq368</b>  | Actinobacteria | Actinobacteria | 0                  | 0                   | 0                  | 0                   |
| <b>seq765</b>  | Actinobacteria | Actinobacteria | 0                  | 0                   | 0                  | 0                   |
| <b>seq802</b>  | Actinobacteria | Actinobacteria | 0                  | 0                   | 0                  | 0                   |
| <b>seq833</b>  | Actinobacteria | Actinobacteria | 0                  | 0                   | 0                  | 0                   |
| <b>seq890</b>  | Actinobacteria | Actinobacteria | 0                  | 0                   | 0                  | 0                   |
| <b>seq1336</b> | Actinobacteria | Actinobacteria | 0                  | 0                   | 0                  | 0                   |
| <b>seq4</b>    | Actinobacteria | Coriobacteriia | 5545               | 5237                | 0                  | 0                   |
| <b>seq131</b>  | Actinobacteria | Coriobacteriia | 0                  | 0                   | 2354               | 4008                |
| <b>seq286</b>  | Actinobacteria | Coriobacteriia | 0                  | 0                   | 0                  | 0                   |
| <b>seq391</b>  | Actinobacteria | Coriobacteriia | 0                  | 0                   | 0                  | 0                   |
| <b>seq590</b>  | Actinobacteria | Coriobacteriia | 0                  | 0                   | 0                  | 0                   |
| <b>seq808</b>  | Actinobacteria | Coriobacteriia | 0                  | 0                   | 0                  | 0                   |
| <b>seq1166</b> | Actinobacteria | Coriobacteriia | 0                  | 0                   | 0                  | 0                   |

Sequence Count Table

|                | <b>Phylum</b>  | <b>Class</b>   | <b>Subject10WK0</b> | <b>Subject10WK12</b> | <b>Subject22WK0</b> | <b>Subject22WK12</b> |
|----------------|----------------|----------------|---------------------|----------------------|---------------------|----------------------|
| <b>seq455</b>  | Actinobacteria | Actinobacteria | 30                  | 0                    | 29                  | 17                   |
| <b>seq1294</b> | Actinobacteria | Actinobacteria | 0                   | 0                    | 12                  | 0                    |
| <b>seq1460</b> | Actinobacteria | Actinobacteria | 0                   | 0                    | 0                   | 0                    |
| <b>seq1552</b> | Actinobacteria | Actinobacteria | 0                   | 12                   | 0                   | 0                    |
| <b>seq1834</b> | Actinobacteria | Actinobacteria | 0                   | 0                    | 0                   | 0                    |
| <b>seq1573</b> | Actinobacteria | Actinobacteria | 0                   | 0                    | 0                   | 0                    |
| <b>seq1354</b> | Actinobacteria | Coriobacteriia | 0                   | 0                    | 0                   | 0                    |
| <b>seq1589</b> | Actinobacteria | Coriobacteriia | 0                   | 0                    | 0                   | 0                    |
| <b>seq1761</b> | Actinobacteria | Coriobacteriia | 0                   | 0                    | 0                   | 0                    |
| <b>seq1848</b> | Actinobacteria | Coriobacteriia | 0                   | 0                    | 0                   | 0                    |
| <b>seq530</b>  | Actinobacteria | Coriobacteriia | 0                   | 0                    | 0                   | 0                    |
| <b>seq507</b>  | Actinobacteria | Coriobacteriia | 0                   | 0                    | 0                   | 0                    |
| <b>seq1769</b> | Actinobacteria | Coriobacteriia | 0                   | 0                    | 0                   | 0                    |
| <b>seq1216</b> | Actinobacteria | Actinobacteria | 0                   | 0                    | 0                   | 0                    |
| <b>seq15</b>   | Actinobacteria | Actinobacteria | 0                   | 0                    | 2185                | 4835                 |
| <b>seq35</b>   | Actinobacteria | Actinobacteria | 0                   | 0                    | 316                 | 227                  |
| <b>seq53</b>   | Actinobacteria | Actinobacteria | 0                   | 0                    | 0                   | 379                  |
| <b>seq93</b>   | Actinobacteria | Actinobacteria | 0                   | 0                    | 861                 | 927                  |
| <b>seq313</b>  | Actinobacteria | Actinobacteria | 0                   | 0                    | 0                   | 0                    |
| <b>seq368</b>  | Actinobacteria | Actinobacteria | 0                   | 0                    | 0                   | 0                    |
| <b>seq765</b>  | Actinobacteria | Actinobacteria | 0                   | 0                    | 0                   | 0                    |
| <b>seq802</b>  | Actinobacteria | Actinobacteria | 0                   | 0                    | 0                   | 0                    |
| <b>seq833</b>  | Actinobacteria | Actinobacteria | 0                   | 0                    | 0                   | 0                    |
| <b>seq890</b>  | Actinobacteria | Actinobacteria | 0                   | 0                    | 0                   | 0                    |
| <b>seq1336</b> | Actinobacteria | Actinobacteria | 0                   | 0                    | 0                   | 0                    |
| <b>seq4</b>    | Actinobacteria | Coriobacteriia | 1519                | 408                  | 15768               | 7538                 |
| <b>seq131</b>  | Actinobacteria | Coriobacteriia | 1901                | 106                  | 0                   | 0                    |
| <b>seq286</b>  | Actinobacteria | Coriobacteriia | 0                   | 0                    | 0                   | 0                    |
| <b>seq391</b>  | Actinobacteria | Coriobacteriia | 0                   | 0                    | 421                 | 230                  |
| <b>seq590</b>  | Actinobacteria | Coriobacteriia | 0                   | 0                    | 0                   | 0                    |
| <b>seq808</b>  | Actinobacteria | Coriobacteriia | 0                   | 0                    | 0                   | 0                    |
| <b>seq1166</b> | Actinobacteria | Coriobacteriia | 0                   | 0                    | 0                   | 0                    |

Sequence Count Table

|                | <b>Phylum</b>  | <b>Class</b>   | <b>Subject23WK0</b> | <b>Subject23WK12</b> | <b>Subject24WK0</b> | <b>Subject24WK12</b> |
|----------------|----------------|----------------|---------------------|----------------------|---------------------|----------------------|
| <b>seq455</b>  | Actinobacteria | Actinobacteria | 0                   | 0                    | 0                   | 0                    |
| <b>seq1294</b> | Actinobacteria | Actinobacteria | 0                   | 0                    | 0                   | 0                    |
| <b>seq1460</b> | Actinobacteria | Actinobacteria | 0                   | 0                    | 0                   | 0                    |
| <b>seq1552</b> | Actinobacteria | Actinobacteria | 0                   | 0                    | 0                   | 0                    |
| <b>seq1834</b> | Actinobacteria | Actinobacteria | 0                   | 6                    | 0                   | 0                    |
| <b>seq1573</b> | Actinobacteria | Actinobacteria | 0                   | 0                    | 0                   | 0                    |
| <b>seq1354</b> | Actinobacteria | Coriobacteriia | 0                   | 0                    | 0                   | 0                    |
| <b>seq1589</b> | Actinobacteria | Coriobacteriia | 0                   | 0                    | 0                   | 0                    |
| <b>seq1761</b> | Actinobacteria | Coriobacteriia | 0                   | 0                    | 0                   | 0                    |
| <b>seq1848</b> | Actinobacteria | Coriobacteriia | 0                   | 0                    | 0                   | 0                    |
| <b>seq530</b>  | Actinobacteria | Coriobacteriia | 0                   | 0                    | 0                   | 0                    |
| <b>seq507</b>  | Actinobacteria | Coriobacteriia | 0                   | 0                    | 0                   | 0                    |
| <b>seq1769</b> | Actinobacteria | Coriobacteriia | 0                   | 0                    | 0                   | 0                    |
| <b>seq1216</b> | Actinobacteria | Actinobacteria | 0                   | 0                    | 0                   | 0                    |
| <b>seq15</b>   | Actinobacteria | Actinobacteria | 1712                | 2083                 | 0                   | 0                    |
| <b>seq35</b>   | Actinobacteria | Actinobacteria | 0                   | 225                  | 172                 | 0                    |
| <b>seq53</b>   | Actinobacteria | Actinobacteria | 399                 | 427                  | 412                 | 0                    |
| <b>seq93</b>   | Actinobacteria | Actinobacteria | 0                   | 0                    | 0                   | 0                    |
| <b>seq313</b>  | Actinobacteria | Actinobacteria | 0                   | 0                    | 0                   | 0                    |
| <b>seq368</b>  | Actinobacteria | Actinobacteria | 0                   | 0                    | 0                   | 0                    |
| <b>seq765</b>  | Actinobacteria | Actinobacteria | 0                   | 0                    | 0                   | 19                   |
| <b>seq802</b>  | Actinobacteria | Actinobacteria | 0                   | 39                   | 0                   | 0                    |
| <b>seq833</b>  | Actinobacteria | Actinobacteria | 0                   | 0                    | 0                   | 0                    |
| <b>seq890</b>  | Actinobacteria | Actinobacteria | 0                   | 0                    | 0                   | 0                    |
| <b>seq1336</b> | Actinobacteria | Actinobacteria | 0                   | 0                    | 0                   | 0                    |
| <b>seq4</b>    | Actinobacteria | Coriobacteriia | 1252                | 2320                 | 0                   | 0                    |
| <b>seq131</b>  | Actinobacteria | Coriobacteriia | 0                   | 0                    | 343                 | 1411                 |
| <b>seq286</b>  | Actinobacteria | Coriobacteriia | 0                   | 0                    | 0                   | 0                    |
| <b>seq391</b>  | Actinobacteria | Coriobacteriia | 0                   | 0                    | 0                   | 0                    |
| <b>seq590</b>  | Actinobacteria | Coriobacteriia | 0                   | 0                    | 0                   | 0                    |
| <b>seq808</b>  | Actinobacteria | Coriobacteriia | 0                   | 0                    | 0                   | 0                    |
| <b>seq1166</b> | Actinobacteria | Coriobacteriia | 0                   | 0                    | 0                   | 0                    |

Sequence Count Table

|                | <b>Phylum</b>  | <b>Class</b>   | <b>Subject11WK0</b> | <b>Subject11WK12</b> | <b>Subject12WK0</b> | <b>Subject12WK12</b> |
|----------------|----------------|----------------|---------------------|----------------------|---------------------|----------------------|
| <b>seq455</b>  | Actinobacteria | Actinobacteria | 12                  | 0                    | 0                   | 0                    |
| <b>seq1294</b> | Actinobacteria | Actinobacteria | 0                   | 0                    | 0                   | 0                    |
| <b>seq1460</b> | Actinobacteria | Actinobacteria | 0                   | 0                    | 0                   | 0                    |
| <b>seq1552</b> | Actinobacteria | Actinobacteria | 0                   | 0                    | 0                   | 0                    |
| <b>seq1834</b> | Actinobacteria | Actinobacteria | 0                   | 0                    | 0                   | 0                    |
| <b>seq1573</b> | Actinobacteria | Actinobacteria | 0                   | 0                    | 0                   | 0                    |
| <b>seq1354</b> | Actinobacteria | Coriobacteriia | 0                   | 0                    | 0                   | 0                    |
| <b>seq1589</b> | Actinobacteria | Coriobacteriia | 0                   | 0                    | 0                   | 0                    |
| <b>seq1761</b> | Actinobacteria | Coriobacteriia | 0                   | 0                    | 0                   | 0                    |
| <b>seq1848</b> | Actinobacteria | Coriobacteriia | 0                   | 0                    | 0                   | 0                    |
| <b>seq530</b>  | Actinobacteria | Coriobacteriia | 0                   | 0                    | 0                   | 0                    |
| <b>seq507</b>  | Actinobacteria | Coriobacteriia | 0                   | 0                    | 0                   | 0                    |
| <b>seq1769</b> | Actinobacteria | Coriobacteriia | 0                   | 0                    | 0                   | 0                    |
| <b>seq1216</b> | Actinobacteria | Actinobacteria | 0                   | 0                    | 0                   | 0                    |
| <b>seq15</b>   | Actinobacteria | Actinobacteria | 0                   | 0                    | 4089                | 9413                 |
| <b>seq35</b>   | Actinobacteria | Actinobacteria | 36                  | 0                    | 533                 | 756                  |
| <b>seq53</b>   | Actinobacteria | Actinobacteria | 0                   | 0                    | 1577                | 1453                 |
| <b>seq93</b>   | Actinobacteria | Actinobacteria | 0                   | 0                    | 1046                | 1096                 |
| <b>seq313</b>  | Actinobacteria | Actinobacteria | 0                   | 0                    | 0                   | 0                    |
| <b>seq368</b>  | Actinobacteria | Actinobacteria | 0                   | 0                    | 0                   | 0                    |
| <b>seq765</b>  | Actinobacteria | Actinobacteria | 240                 | 0                    | 0                   | 0                    |
| <b>seq802</b>  | Actinobacteria | Actinobacteria | 0                   | 0                    | 0                   | 0                    |
| <b>seq833</b>  | Actinobacteria | Actinobacteria | 0                   | 0                    | 0                   | 0                    |
| <b>seq890</b>  | Actinobacteria | Actinobacteria | 0                   | 0                    | 0                   | 0                    |
| <b>seq1336</b> | Actinobacteria | Actinobacteria | 0                   | 0                    | 0                   | 0                    |
| <b>seq4</b>    | Actinobacteria | Coriobacteriia | 0                   | 0                    | 1732                | 4407                 |
| <b>seq131</b>  | Actinobacteria | Coriobacteriia | 0                   | 0                    | 0                   | 0                    |
| <b>seq286</b>  | Actinobacteria | Coriobacteriia | 0                   | 0                    | 0                   | 0                    |
| <b>seq391</b>  | Actinobacteria | Coriobacteriia | 0                   | 0                    | 0                   | 0                    |
| <b>seq590</b>  | Actinobacteria | Coriobacteriia | 0                   | 0                    | 0                   | 0                    |
| <b>seq808</b>  | Actinobacteria | Coriobacteriia | 0                   | 0                    | 0                   | 0                    |
| <b>seq1166</b> | Actinobacteria | Coriobacteriia | 0                   | 0                    | 0                   | 0                    |

Sequence Count Table

|                | <b>Phylum</b>  | <b>Class</b>   | <b>Subject25WK0</b> | <b>Subject25WK12</b> | <b>Subject38WK0</b> | <b>Subject38WK12</b> |
|----------------|----------------|----------------|---------------------|----------------------|---------------------|----------------------|
| <b>seq455</b>  | Actinobacteria | Actinobacteria | 0                   | 0                    | 0                   | 0                    |
| <b>seq1294</b> | Actinobacteria | Actinobacteria | 0                   | 0                    | 0                   | 0                    |
| <b>seq1460</b> | Actinobacteria | Actinobacteria | 0                   | 0                    | 0                   | 0                    |
| <b>seq1552</b> | Actinobacteria | Actinobacteria | 0                   | 0                    | 0                   | 0                    |
| <b>seq1834</b> | Actinobacteria | Actinobacteria | 0                   | 0                    | 0                   | 0                    |
| <b>seq1573</b> | Actinobacteria | Actinobacteria | 0                   | 22                   | 0                   | 0                    |
| <b>seq1354</b> | Actinobacteria | Coriobacteriia | 0                   | 0                    | 0                   | 0                    |
| <b>seq1589</b> | Actinobacteria | Coriobacteriia | 0                   | 0                    | 0                   | 0                    |
| <b>seq1761</b> | Actinobacteria | Coriobacteriia | 0                   | 0                    | 0                   | 0                    |
| <b>seq1848</b> | Actinobacteria | Coriobacteriia | 0                   | 0                    | 0                   | 0                    |
| <b>seq530</b>  | Actinobacteria | Coriobacteriia | 0                   | 0                    | 0                   | 0                    |
| <b>seq507</b>  | Actinobacteria | Coriobacteriia | 0                   | 0                    | 0                   | 0                    |
| <b>seq1769</b> | Actinobacteria | Coriobacteriia | 0                   | 0                    | 0                   | 0                    |
| <b>seq1216</b> | Actinobacteria | Actinobacteria | 0                   | 0                    | 0                   | 0                    |
| <b>seq15</b>   | Actinobacteria | Actinobacteria | 24466               | 8864                 | 0                   | 0                    |
| <b>seq35</b>   | Actinobacteria | Actinobacteria | 2076                | 1132                 | 0                   | 0                    |
| <b>seq53</b>   | Actinobacteria | Actinobacteria | 1491                | 960                  | 0                   | 0                    |
| <b>seq93</b>   | Actinobacteria | Actinobacteria | 2178                | 2078                 | 0                   | 0                    |
| <b>seq313</b>  | Actinobacteria | Actinobacteria | 0                   | 0                    | 0                   | 0                    |
| <b>seq368</b>  | Actinobacteria | Actinobacteria | 0                   | 0                    | 0                   | 0                    |
| <b>seq765</b>  | Actinobacteria | Actinobacteria | 0                   | 0                    | 0                   | 0                    |
| <b>seq802</b>  | Actinobacteria | Actinobacteria | 0                   | 0                    | 0                   | 0                    |
| <b>seq833</b>  | Actinobacteria | Actinobacteria | 0                   | 0                    | 0                   | 0                    |
| <b>seq890</b>  | Actinobacteria | Actinobacteria | 11                  | 49                   | 0                   | 0                    |
| <b>seq1336</b> | Actinobacteria | Actinobacteria | 0                   | 0                    | 0                   | 0                    |
| <b>seq4</b>    | Actinobacteria | Coriobacteriia | 13060               | 6568                 | 0                   | 0                    |
| <b>seq131</b>  | Actinobacteria | Coriobacteriia | 0                   | 0                    | 0                   | 0                    |
| <b>seq286</b>  | Actinobacteria | Coriobacteriia | 0                   | 0                    | 0                   | 0                    |
| <b>seq391</b>  | Actinobacteria | Coriobacteriia | 0                   | 0                    | 0                   | 0                    |
| <b>seq590</b>  | Actinobacteria | Coriobacteriia | 0                   | 0                    | 0                   | 0                    |
| <b>seq808</b>  | Actinobacteria | Coriobacteriia | 0                   | 0                    | 0                   | 0                    |
| <b>seq1166</b> | Actinobacteria | Coriobacteriia | 0                   | 0                    | 0                   | 0                    |

Sequence Count Table

|                | <b>Phylum</b>  | <b>Class</b>   | <b>Subject31WK0</b> | <b>Subject31WK12</b> | <b>Subject32WK0</b> | <b>Subject32WK12</b> |
|----------------|----------------|----------------|---------------------|----------------------|---------------------|----------------------|
| <b>seq455</b>  | Actinobacteria | Actinobacteria | 0                   | 0                    | 21                  | 0                    |
| <b>seq1294</b> | Actinobacteria | Actinobacteria | 0                   | 0                    | 0                   | 0                    |
| <b>seq1460</b> | Actinobacteria | Actinobacteria | 0                   | 0                    | 0                   | 0                    |
| <b>seq1552</b> | Actinobacteria | Actinobacteria | 0                   | 0                    | 0                   | 0                    |
| <b>seq1834</b> | Actinobacteria | Actinobacteria | 0                   | 0                    | 0                   | 0                    |
| <b>seq1573</b> | Actinobacteria | Actinobacteria | 0                   | 0                    | 0                   | 0                    |
| <b>seq1354</b> | Actinobacteria | Coriobacteriia | 0                   | 0                    | 8                   | 0                    |
| <b>seq1589</b> | Actinobacteria | Coriobacteriia | 0                   | 0                    | 0                   | 0                    |
| <b>seq1761</b> | Actinobacteria | Coriobacteriia | 0                   | 0                    | 0                   | 0                    |
| <b>seq1848</b> | Actinobacteria | Coriobacteriia | 0                   | 0                    | 0                   | 0                    |
| <b>seq530</b>  | Actinobacteria | Coriobacteriia | 0                   | 0                    | 0                   | 0                    |
| <b>seq507</b>  | Actinobacteria | Coriobacteriia | 0                   | 0                    | 0                   | 0                    |
| <b>seq1769</b> | Actinobacteria | Coriobacteriia | 0                   | 0                    | 0                   | 0                    |
| <b>seq1216</b> | Actinobacteria | Actinobacteria | 0                   | 0                    | 0                   | 0                    |
| <b>seq15</b>   | Actinobacteria | Actinobacteria | 0                   | 0                    | 0                   | 0                    |
| <b>seq35</b>   | Actinobacteria | Actinobacteria | 0                   | 0                    | 1711                | 0                    |
| <b>seq53</b>   | Actinobacteria | Actinobacteria | 0                   | 0                    | 5290                | 0                    |
| <b>seq93</b>   | Actinobacteria | Actinobacteria | 0                   | 0                    | 0                   | 0                    |
| <b>seq313</b>  | Actinobacteria | Actinobacteria | 0                   | 0                    | 0                   | 0                    |
| <b>seq368</b>  | Actinobacteria | Actinobacteria | 0                   | 0                    | 0                   | 0                    |
| <b>seq765</b>  | Actinobacteria | Actinobacteria | 0                   | 0                    | 0                   | 0                    |
| <b>seq802</b>  | Actinobacteria | Actinobacteria | 0                   | 0                    | 0                   | 0                    |
| <b>seq833</b>  | Actinobacteria | Actinobacteria | 0                   | 0                    | 0                   | 0                    |
| <b>seq890</b>  | Actinobacteria | Actinobacteria | 0                   | 0                    | 0                   | 0                    |
| <b>seq1336</b> | Actinobacteria | Actinobacteria | 0                   | 0                    | 0                   | 0                    |
| <b>seq4</b>    | Actinobacteria | Coriobacteriia | 0                   | 0                    | 0                   | 0                    |
| <b>seq131</b>  | Actinobacteria | Coriobacteriia | 0                   | 0                    | 0                   | 0                    |
| <b>seq286</b>  | Actinobacteria | Coriobacteriia | 0                   | 0                    | 0                   | 0                    |
| <b>seq391</b>  | Actinobacteria | Coriobacteriia | 0                   | 0                    | 0                   | 0                    |
| <b>seq590</b>  | Actinobacteria | Coriobacteriia | 0                   | 0                    | 0                   | 0                    |
| <b>seq808</b>  | Actinobacteria | Coriobacteriia | 0                   | 0                    | 0                   | 0                    |
| <b>seq1166</b> | Actinobacteria | Coriobacteriia | 0                   | 0                    | 0                   | 0                    |



Sequence Count Table

|                | <b>Phylum</b>  | <b>Class</b>   | <b>Subject13WK0</b> | <b>Subject13WK12</b> | <b>Subject39WK0</b> | <b>Subject39WK12</b> |
|----------------|----------------|----------------|---------------------|----------------------|---------------------|----------------------|
| <b>seq455</b>  | Actinobacteria | Actinobacteria | 10                  | 0                    | 0                   | 27                   |
| <b>seq1294</b> | Actinobacteria | Actinobacteria | 0                   | 0                    | 0                   | 0                    |
| <b>seq1460</b> | Actinobacteria | Actinobacteria | 0                   | 0                    | 0                   | 0                    |
| <b>seq1552</b> | Actinobacteria | Actinobacteria | 0                   | 0                    | 0                   | 0                    |
| <b>seq1834</b> | Actinobacteria | Actinobacteria | 0                   | 0                    | 0                   | 0                    |
| <b>seq1573</b> | Actinobacteria | Actinobacteria | 0                   | 0                    | 0                   | 0                    |
| <b>seq1354</b> | Actinobacteria | Coriobacteriia | 0                   | 0                    | 0                   | 0                    |
| <b>seq1589</b> | Actinobacteria | Coriobacteriia | 0                   | 0                    | 0                   | 0                    |
| <b>seq1761</b> | Actinobacteria | Coriobacteriia | 0                   | 0                    | 0                   | 0                    |
| <b>seq1848</b> | Actinobacteria | Coriobacteriia | 0                   | 0                    | 0                   | 0                    |
| <b>seq530</b>  | Actinobacteria | Coriobacteriia | 0                   | 0                    | 0                   | 0                    |
| <b>seq507</b>  | Actinobacteria | Coriobacteriia | 0                   | 0                    | 0                   | 0                    |
| <b>seq1769</b> | Actinobacteria | Coriobacteriia | 0                   | 0                    | 0                   | 0                    |
| <b>seq1216</b> | Actinobacteria | Actinobacteria | 0                   | 0                    | 0                   | 0                    |
| <b>seq15</b>   | Actinobacteria | Actinobacteria | 0                   | 0                    | 0                   | 0                    |
| <b>seq35</b>   | Actinobacteria | Actinobacteria | 0                   | 0                    | 0                   | 0                    |
| <b>seq53</b>   | Actinobacteria | Actinobacteria | 714                 | 0                    | 0                   | 0                    |
| <b>seq93</b>   | Actinobacteria | Actinobacteria | 0                   | 0                    | 0                   | 0                    |
| <b>seq313</b>  | Actinobacteria | Actinobacteria | 0                   | 0                    | 0                   | 0                    |
| <b>seq368</b>  | Actinobacteria | Actinobacteria | 0                   | 0                    | 0                   | 0                    |
| <b>seq765</b>  | Actinobacteria | Actinobacteria | 0                   | 0                    | 0                   | 0                    |
| <b>seq802</b>  | Actinobacteria | Actinobacteria | 0                   | 0                    | 0                   | 0                    |
| <b>seq833</b>  | Actinobacteria | Actinobacteria | 0                   | 0                    | 0                   | 0                    |
| <b>seq890</b>  | Actinobacteria | Actinobacteria | 0                   | 0                    | 0                   | 0                    |
| <b>seq1336</b> | Actinobacteria | Actinobacteria | 0                   | 0                    | 0                   | 0                    |
| <b>seq4</b>    | Actinobacteria | Coriobacteriia | 2942                | 851                  | 0                   | 13567                |
| <b>seq131</b>  | Actinobacteria | Coriobacteriia | 0                   | 0                    | 0                   | 0                    |
| <b>seq286</b>  | Actinobacteria | Coriobacteriia | 0                   | 0                    | 0                   | 0                    |
| <b>seq391</b>  | Actinobacteria | Coriobacteriia | 0                   | 0                    | 0                   | 0                    |
| <b>seq590</b>  | Actinobacteria | Coriobacteriia | 0                   | 0                    | 0                   | 0                    |
| <b>seq808</b>  | Actinobacteria | Coriobacteriia | 0                   | 0                    | 0                   | 0                    |
| <b>seq1166</b> | Actinobacteria | Coriobacteriia | 0                   | 0                    | 0                   | 0                    |

Sequence Count Table

|                | <b>Phylum</b>  | <b>Class</b>   | <b>Subject26WK0</b> | <b>Subject26WK12</b> | <b>Subject14WK0</b> | <b>Subject14WK12</b> |
|----------------|----------------|----------------|---------------------|----------------------|---------------------|----------------------|
| <b>seq455</b>  | Actinobacteria | Actinobacteria | 8                   | 13                   | 0                   | 0                    |
| <b>seq1294</b> | Actinobacteria | Actinobacteria | 0                   | 0                    | 0                   | 0                    |
| <b>seq1460</b> | Actinobacteria | Actinobacteria | 0                   | 0                    | 0                   | 0                    |
| <b>seq1552</b> | Actinobacteria | Actinobacteria | 0                   | 0                    | 0                   | 0                    |
| <b>seq1834</b> | Actinobacteria | Actinobacteria | 0                   | 0                    | 0                   | 0                    |
| <b>seq1573</b> | Actinobacteria | Actinobacteria | 0                   | 0                    | 0                   | 0                    |
| <b>seq1354</b> | Actinobacteria | Coriobacteriia | 0                   | 0                    | 0                   | 0                    |
| <b>seq1589</b> | Actinobacteria | Coriobacteriia | 0                   | 0                    | 0                   | 0                    |
| <b>seq1761</b> | Actinobacteria | Coriobacteriia | 10                  | 0                    | 0                   | 0                    |
| <b>seq1848</b> | Actinobacteria | Coriobacteriia | 0                   | 0                    | 0                   | 0                    |
| <b>seq530</b>  | Actinobacteria | Coriobacteriia | 0                   | 0                    | 0                   | 0                    |
| <b>seq507</b>  | Actinobacteria | Coriobacteriia | 0                   | 0                    | 0                   | 0                    |
| <b>seq1769</b> | Actinobacteria | Coriobacteriia | 0                   | 0                    | 0                   | 0                    |
| <b>seq1216</b> | Actinobacteria | Actinobacteria | 0                   | 0                    | 0                   | 0                    |
| <b>seq15</b>   | Actinobacteria | Actinobacteria | 0                   | 0                    | 219                 | 282                  |
| <b>seq35</b>   | Actinobacteria | Actinobacteria | 5803                | 3046                 | 1488                | 1629                 |
| <b>seq53</b>   | Actinobacteria | Actinobacteria | 0                   | 0                    | 633                 | 350                  |
| <b>seq93</b>   | Actinobacteria | Actinobacteria | 0                   | 0                    | 17                  | 0                    |
| <b>seq313</b>  | Actinobacteria | Actinobacteria | 0                   | 0                    | 0                   | 0                    |
| <b>seq368</b>  | Actinobacteria | Actinobacteria | 0                   | 0                    | 0                   | 0                    |
| <b>seq765</b>  | Actinobacteria | Actinobacteria | 0                   | 0                    | 0                   | 0                    |
| <b>seq802</b>  | Actinobacteria | Actinobacteria | 0                   | 0                    | 0                   | 0                    |
| <b>seq833</b>  | Actinobacteria | Actinobacteria | 0                   | 0                    | 0                   | 242                  |
| <b>seq890</b>  | Actinobacteria | Actinobacteria | 85                  | 0                    | 0                   | 0                    |
| <b>seq1336</b> | Actinobacteria | Actinobacteria | 0                   | 0                    | 0                   | 0                    |
| <b>seq4</b>    | Actinobacteria | Coriobacteriia | 0                   | 0                    | 687                 | 1761                 |
| <b>seq131</b>  | Actinobacteria | Coriobacteriia | 0                   | 0                    | 0                   | 0                    |
| <b>seq286</b>  | Actinobacteria | Coriobacteriia | 0                   | 0                    | 0                   | 0                    |
| <b>seq391</b>  | Actinobacteria | Coriobacteriia | 0                   | 0                    | 0                   | 0                    |
| <b>seq590</b>  | Actinobacteria | Coriobacteriia | 0                   | 0                    | 0                   | 0                    |
| <b>seq808</b>  | Actinobacteria | Coriobacteriia | 0                   | 0                    | 0                   | 0                    |
| <b>seq1166</b> | Actinobacteria | Coriobacteriia | 0                   | 0                    | 0                   | 0                    |

Sequence Count Table

|                | <b>Phylum</b>  | <b>Class</b>   | <b>Subject27WK0</b> | <b>Subject27WK12</b> | <b>Subject15WK0</b> | <b>Subject15WK12</b> |
|----------------|----------------|----------------|---------------------|----------------------|---------------------|----------------------|
| <b>seq455</b>  | Actinobacteria | Actinobacteria | 40                  | 82                   | 33                  | 23                   |
| <b>seq1294</b> | Actinobacteria | Actinobacteria | 0                   | 0                    | 0                   | 0                    |
| <b>seq1460</b> | Actinobacteria | Actinobacteria | 0                   | 0                    | 0                   | 0                    |
| <b>seq1552</b> | Actinobacteria | Actinobacteria | 0                   | 0                    | 0                   | 0                    |
| <b>seq1834</b> | Actinobacteria | Actinobacteria | 0                   | 0                    | 0                   | 0                    |
| <b>seq1573</b> | Actinobacteria | Actinobacteria | 0                   | 0                    | 0                   | 0                    |
| <b>seq1354</b> | Actinobacteria | Coriobacteriia | 0                   | 0                    | 5                   | 0                    |
| <b>seq1589</b> | Actinobacteria | Coriobacteriia | 0                   | 0                    | 0                   | 0                    |
| <b>seq1761</b> | Actinobacteria | Coriobacteriia | 0                   | 0                    | 0                   | 0                    |
| <b>seq1848</b> | Actinobacteria | Coriobacteriia | 0                   | 0                    | 0                   | 0                    |
| <b>seq530</b>  | Actinobacteria | Coriobacteriia | 0                   | 0                    | 0                   | 0                    |
| <b>seq507</b>  | Actinobacteria | Coriobacteriia | 0                   | 0                    | 0                   | 0                    |
| <b>seq1769</b> | Actinobacteria | Coriobacteriia | 0                   | 0                    | 0                   | 0                    |
| <b>seq1216</b> | Actinobacteria | Actinobacteria | 0                   | 0                    | 0                   | 0                    |
| <b>seq15</b>   | Actinobacteria | Actinobacteria | 0                   | 0                    | 0                   | 0                    |
| <b>seq35</b>   | Actinobacteria | Actinobacteria | 0                   | 0                    | 0                   | 0                    |
| <b>seq53</b>   | Actinobacteria | Actinobacteria | 0                   | 0                    | 0                   | 0                    |
| <b>seq93</b>   | Actinobacteria | Actinobacteria | 0                   | 0                    | 146                 | 0                    |
| <b>seq313</b>  | Actinobacteria | Actinobacteria | 0                   | 0                    | 0                   | 0                    |
| <b>seq368</b>  | Actinobacteria | Actinobacteria | 0                   | 0                    | 0                   | 0                    |
| <b>seq765</b>  | Actinobacteria | Actinobacteria | 0                   | 0                    | 0                   | 0                    |
| <b>seq802</b>  | Actinobacteria | Actinobacteria | 0                   | 0                    | 0                   | 0                    |
| <b>seq833</b>  | Actinobacteria | Actinobacteria | 0                   | 0                    | 0                   | 0                    |
| <b>seq890</b>  | Actinobacteria | Actinobacteria | 0                   | 0                    | 0                   | 0                    |
| <b>seq1336</b> | Actinobacteria | Actinobacteria | 51                  | 0                    | 0                   | 0                    |
| <b>seq4</b>    | Actinobacteria | Coriobacteriia | 6848                | 7506                 | 1604                | 746                  |
| <b>seq131</b>  | Actinobacteria | Coriobacteriia | 0                   | 0                    | 0                   | 0                    |
| <b>seq286</b>  | Actinobacteria | Coriobacteriia | 0                   | 0                    | 0                   | 0                    |
| <b>seq391</b>  | Actinobacteria | Coriobacteriia | 0                   | 0                    | 0                   | 0                    |
| <b>seq590</b>  | Actinobacteria | Coriobacteriia | 0                   | 0                    | 0                   | 0                    |
| <b>seq808</b>  | Actinobacteria | Coriobacteriia | 0                   | 0                    | 0                   | 0                    |
| <b>seq1166</b> | Actinobacteria | Coriobacteriia | 0                   | 0                    | 89                  | 0                    |

Sequence Count Table

|                | <b>Phylum</b>  | <b>Class</b>   | <b>Δ</b> |  |  |  |
|----------------|----------------|----------------|----------|--|--|--|
| <b>seq455</b>  | Actinobacteria | Actinobacteria |          |  |  |  |
| <b>seq1294</b> | Actinobacteria | Actinobacteria |          |  |  |  |
| <b>seq1460</b> | Actinobacteria | Actinobacteria |          |  |  |  |
| <b>seq1552</b> | Actinobacteria | Actinobacteria |          |  |  |  |
| <b>seq1834</b> | Actinobacteria | Actinobacteria |          |  |  |  |
| <b>seq1573</b> | Actinobacteria | Actinobacteria |          |  |  |  |
| <b>seq1354</b> | Actinobacteria | Coriobacteriia |          |  |  |  |
| <b>seq1589</b> | Actinobacteria | Coriobacteriia |          |  |  |  |
| <b>seq1761</b> | Actinobacteria | Coriobacteriia |          |  |  |  |
| <b>seq1848</b> | Actinobacteria | Coriobacteriia |          |  |  |  |
| <b>seq530</b>  | Actinobacteria | Coriobacteriia |          |  |  |  |
| <b>seq507</b>  | Actinobacteria | Coriobacteriia |          |  |  |  |
| <b>seq1769</b> | Actinobacteria | Coriobacteriia |          |  |  |  |
| <b>seq1216</b> | Actinobacteria | Actinobacteria |          |  |  |  |
| <b>seq15</b>   | Actinobacteria | Actinobacteria |          |  |  |  |
| <b>seq35</b>   | Actinobacteria | Actinobacteria |          |  |  |  |
| <b>seq53</b>   | Actinobacteria | Actinobacteria |          |  |  |  |
| <b>seq93</b>   | Actinobacteria | Actinobacteria |          |  |  |  |
| <b>seq313</b>  | Actinobacteria | Actinobacteria |          |  |  |  |
| <b>seq368</b>  | Actinobacteria | Actinobacteria |          |  |  |  |
| <b>seq765</b>  | Actinobacteria | Actinobacteria |          |  |  |  |
| <b>seq802</b>  | Actinobacteria | Actinobacteria |          |  |  |  |
| <b>seq833</b>  | Actinobacteria | Actinobacteria |          |  |  |  |
| <b>seq890</b>  | Actinobacteria | Actinobacteria |          |  |  |  |
| <b>seq1336</b> | Actinobacteria | Actinobacteria |          |  |  |  |
| <b>seq4</b>    | Actinobacteria | Coriobacteriia |          |  |  |  |
| <b>seq131</b>  | Actinobacteria | Coriobacteriia |          |  |  |  |
| <b>seq286</b>  | Actinobacteria | Coriobacteriia |          |  |  |  |
| <b>seq391</b>  | Actinobacteria | Coriobacteriia |          |  |  |  |
| <b>seq590</b>  | Actinobacteria | Coriobacteriia |          |  |  |  |
| <b>seq808</b>  | Actinobacteria | Coriobacteriia |          |  |  |  |
| <b>seq1166</b> | Actinobacteria | Coriobacteriia |          |  |  |  |

Sequence Count Table

|                | <b>Phylum</b>  | <b>Class</b>   | <b>Order</b>      | <b>Family</b>                   |
|----------------|----------------|----------------|-------------------|---------------------------------|
| <b>seq885</b>  | Actinobacteria | Coriobacteriia | Coriobacteriales  | Coriobacteriales_Incertae_Sedis |
| <b>seq1169</b> | Actinobacteria | Coriobacteriia | Coriobacteriales  | Coriobacteriales_Incertae_Sedis |
| <b>seq248</b>  | Actinobacteria | Coriobacteriia | Coriobacteriales  | Coriobacteriales_Incertae_Sedis |
| <b>seq1190</b> | Actinobacteria | Coriobacteriia | Coriobacteriales  | Coriobacteriales_Incertae_Sedis |
| <b>seq1293</b> | Actinobacteria | Coriobacteriia | Coriobacteriales  | Coriobacteriales_Incertae_Sedis |
| <b>seq1593</b> | Actinobacteria | Actinobacteria | Corynebacteriales | Corynebacteriaceae              |
| <b>seq1867</b> | Actinobacteria | Actinobacteria | Corynebacteriales | Corynebacteriaceae              |
| <b>seq1225</b> | Actinobacteria | Actinobacteria | Corynebacteriales | Corynebacteriaceae              |
| <b>seq130</b>  | Actinobacteria | Coriobacteriia | Coriobacteriales  | Eggerthellaceae                 |
| <b>seq754</b>  | Actinobacteria | Coriobacteriia | Coriobacteriales  | Eggerthellaceae                 |
| <b>seq148</b>  | Actinobacteria | Coriobacteriia | Coriobacteriales  | Eggerthellaceae                 |
| <b>seq356</b>  | Actinobacteria | Coriobacteriia | Coriobacteriales  | Eggerthellaceae                 |
| <b>seq519</b>  | Actinobacteria | Coriobacteriia | Coriobacteriales  | Eggerthellaceae                 |
| <b>seq315</b>  | Actinobacteria | Coriobacteriia | Coriobacteriales  | Eggerthellaceae                 |
| <b>seq360</b>  | Actinobacteria | Coriobacteriia | Coriobacteriales  | Eggerthellaceae                 |
| <b>seq910</b>  | Actinobacteria | Coriobacteriia | Coriobacteriales  | Eggerthellaceae                 |
| <b>seq1068</b> | Actinobacteria | Coriobacteriia | Coriobacteriales  | Eggerthellaceae                 |
| <b>seq1431</b> | Actinobacteria | Coriobacteriia | Coriobacteriales  | Eggerthellaceae                 |
| <b>seq1557</b> | Actinobacteria | Coriobacteriia | Coriobacteriales  | Eggerthellaceae                 |
| <b>seq1324</b> | Actinobacteria | Coriobacteriia | Coriobacteriales  | Eggerthellaceae                 |
| <b>seq184</b>  | Actinobacteria | Coriobacteriia | Coriobacteriales  | Eggerthellaceae                 |
| <b>seq421</b>  | Actinobacteria | Coriobacteriia | Coriobacteriales  | Eggerthellaceae                 |
| <b>seq222</b>  | Actinobacteria | Coriobacteriia | Coriobacteriales  | Eggerthellaceae                 |
| <b>seq396</b>  | Actinobacteria | Coriobacteriia | Coriobacteriales  | Eggerthellaceae                 |
| <b>seq451</b>  | Actinobacteria | Coriobacteriia | Coriobacteriales  | Eggerthellaceae                 |
| <b>seq642</b>  | Actinobacteria | Coriobacteriia | Coriobacteriales  | Eggerthellaceae                 |
| <b>seq767</b>  | Actinobacteria | Coriobacteriia | Coriobacteriales  | Eggerthellaceae                 |
| <b>seq1594</b> | Actinobacteria | Coriobacteriia | Coriobacteriales  | Eggerthellaceae                 |
| <b>seq1649</b> | Actinobacteria | Coriobacteriia | Coriobacteriales  | Eggerthellaceae                 |
| <b>seq1520</b> | Actinobacteria | Actinobacteria | Micrococcales     | Micrococcaceae                  |
| <b>seq1728</b> | Actinobacteria | Actinobacteria | Micrococcales     | Micrococcaceae                  |
| <b>seq1836</b> | Actinobacteria | Actinobacteria | Micrococcales     | Micrococcaceae                  |

Sequence Count Table

|                | <b>Phylum</b>  | <b>Class</b>   | <b>Genus</b>      | <b>Species</b>       |
|----------------|----------------|----------------|-------------------|----------------------|
| <b>seq885</b>  | Actinobacteria | Coriobacteriia | Raoultibacter     | timonensis           |
| <b>seq1169</b> | Actinobacteria | Coriobacteriia | Raoultibacter     | massiliensis         |
| <b>seq248</b>  | Actinobacteria | Coriobacteriia |                   |                      |
| <b>seq1190</b> | Actinobacteria | Coriobacteriia |                   |                      |
| <b>seq1293</b> | Actinobacteria | Coriobacteriia |                   |                      |
| <b>seq1593</b> | Actinobacteria | Actinobacteria | Corynebacterium   | durum                |
| <b>seq1867</b> | Actinobacteria | Actinobacteria | Corynebacterium_1 |                      |
| <b>seq1225</b> | Actinobacteria | Actinobacteria | Lawsonella        | clevelandensis       |
| <b>seq130</b>  | Actinobacteria | Coriobacteriia | Adlercreutzia     |                      |
| <b>seq754</b>  | Actinobacteria | Coriobacteriia | DNF00809          |                      |
| <b>seq148</b>  | Actinobacteria | Coriobacteriia | Eggerthella       | lenta                |
| <b>seq356</b>  | Actinobacteria | Coriobacteriia | Eggerthella       |                      |
| <b>seq519</b>  | Actinobacteria | Coriobacteriia | Eggerthella       |                      |
| <b>seq315</b>  | Actinobacteria | Coriobacteriia | Enterorhabdus     |                      |
| <b>seq360</b>  | Actinobacteria | Coriobacteriia | Gordonibacter     |                      |
| <b>seq910</b>  | Actinobacteria | Coriobacteriia | Gordonibacter     | urolithinfaciens     |
| <b>seq1068</b> | Actinobacteria | Coriobacteriia | Gordonibacter     |                      |
| <b>seq1431</b> | Actinobacteria | Coriobacteriia | Gordonibacter     |                      |
| <b>seq1557</b> | Actinobacteria | Coriobacteriia | Gordonibacter     |                      |
| <b>seq1324</b> | Actinobacteria | Coriobacteriia | Parvibacter       |                      |
| <b>seq184</b>  | Actinobacteria | Coriobacteriia | Senegalimassilia  | anaerobia            |
| <b>seq421</b>  | Actinobacteria | Coriobacteriia | Senegalimassilia  |                      |
| <b>seq222</b>  | Actinobacteria | Coriobacteriia | Slackia           | isoflavoniconvertens |
| <b>seq396</b>  | Actinobacteria | Coriobacteriia | Slackia           | piriformis           |
| <b>seq451</b>  | Actinobacteria | Coriobacteriia |                   |                      |
| <b>seq642</b>  | Actinobacteria | Coriobacteriia |                   |                      |
| <b>seq767</b>  | Actinobacteria | Coriobacteriia |                   |                      |
| <b>seq1594</b> | Actinobacteria | Coriobacteriia |                   |                      |
| <b>seq1649</b> | Actinobacteria | Coriobacteriia |                   |                      |
| <b>seq1520</b> | Actinobacteria | Actinobacteria | Rothia            |                      |
| <b>seq1728</b> | Actinobacteria | Actinobacteria | Rothia            | mucilaginoso         |
| <b>seq1836</b> | Actinobacteria | Actinobacteria | Rothia            | mucilaginoso         |

Sequence Count Table

|                | <b>Phylum</b>  | <b>Class</b>   | <b>Subject34WK0</b> | <b>Subject34WK12</b> | <b>Subject16WK0</b> | <b>Subject16WK12</b> |
|----------------|----------------|----------------|---------------------|----------------------|---------------------|----------------------|
| <b>seq885</b>  | Actinobacteria | Coriobacteriia | 0                   | 0                    | 0                   | 0                    |
| <b>seq1169</b> | Actinobacteria | Coriobacteriia | 0                   | 0                    | 0                   | 0                    |
| <b>seq248</b>  | Actinobacteria | Coriobacteriia | 0                   | 0                    | 5                   | 21                   |
| <b>seq1190</b> | Actinobacteria | Coriobacteriia | 0                   | 0                    | 0                   | 0                    |
| <b>seq1293</b> | Actinobacteria | Coriobacteriia | 0                   | 0                    | 0                   | 0                    |
| <b>seq1593</b> | Actinobacteria | Actinobacteria | 0                   | 0                    | 0                   | 0                    |
| <b>seq1867</b> | Actinobacteria | Actinobacteria | 0                   | 0                    | 0                   | 0                    |
| <b>seq1225</b> | Actinobacteria | Actinobacteria | 0                   | 0                    | 0                   | 0                    |
| <b>seq130</b>  | Actinobacteria | Coriobacteriia | 0                   | 0                    | 0                   | 0                    |
| <b>seq754</b>  | Actinobacteria | Coriobacteriia | 0                   | 0                    | 0                   | 0                    |
| <b>seq148</b>  | Actinobacteria | Coriobacteriia | 0                   | 0                    | 0                   | 0                    |
| <b>seq356</b>  | Actinobacteria | Coriobacteriia | 0                   | 0                    | 0                   | 0                    |
| <b>seq519</b>  | Actinobacteria | Coriobacteriia | 0                   | 0                    | 0                   | 0                    |
| <b>seq315</b>  | Actinobacteria | Coriobacteriia | 0                   | 0                    | 207                 | 200                  |
| <b>seq360</b>  | Actinobacteria | Coriobacteriia | 0                   | 0                    | 0                   | 0                    |
| <b>seq910</b>  | Actinobacteria | Coriobacteriia | 0                   | 0                    | 0                   | 0                    |
| <b>seq1068</b> | Actinobacteria | Coriobacteriia | 0                   | 25                   | 0                   | 0                    |
| <b>seq1431</b> | Actinobacteria | Coriobacteriia | 0                   | 0                    | 0                   | 0                    |
| <b>seq1557</b> | Actinobacteria | Coriobacteriia | 0                   | 0                    | 0                   | 0                    |
| <b>seq1324</b> | Actinobacteria | Coriobacteriia | 0                   | 0                    | 0                   | 0                    |
| <b>seq184</b>  | Actinobacteria | Coriobacteriia | 0                   | 555                  | 247                 | 391                  |
| <b>seq421</b>  | Actinobacteria | Coriobacteriia | 0                   | 0                    | 0                   | 0                    |
| <b>seq222</b>  | Actinobacteria | Coriobacteriia | 0                   | 49                   | 227                 | 266                  |
| <b>seq396</b>  | Actinobacteria | Coriobacteriia | 0                   | 0                    | 0                   | 0                    |
| <b>seq451</b>  | Actinobacteria | Coriobacteriia | 0                   | 0                    | 0                   | 0                    |
| <b>seq642</b>  | Actinobacteria | Coriobacteriia | 0                   | 0                    | 0                   | 0                    |
| <b>seq767</b>  | Actinobacteria | Coriobacteriia | 0                   | 0                    | 0                   | 0                    |
| <b>seq1594</b> | Actinobacteria | Coriobacteriia | 0                   | 0                    | 0                   | 0                    |
| <b>seq1649</b> | Actinobacteria | Coriobacteriia | 0                   | 0                    | 0                   | 0                    |
| <b>seq1520</b> | Actinobacteria | Actinobacteria | 0                   | 0                    | 0                   | 0                    |
| <b>seq1728</b> | Actinobacteria | Actinobacteria | 0                   | 0                    | 0                   | 0                    |
| <b>seq1836</b> | Actinobacteria | Actinobacteria | 0                   | 0                    | 0                   | 0                    |

Sequence Count Table

|                | <b>Phylum</b>  | <b>Class</b>   | <b>Subject17WK0</b> | <b>Subject17WK12</b> | <b>Subject1WK0</b> | <b>Subject1WK12</b> |
|----------------|----------------|----------------|---------------------|----------------------|--------------------|---------------------|
| <b>seq885</b>  | Actinobacteria | Coriobacteriia | 90                  | 80                   | 0                  | 0                   |
| <b>seq1169</b> | Actinobacteria | Coriobacteriia | 0                   | 0                    | 0                  | 0                   |
| <b>seq248</b>  | Actinobacteria | Coriobacteriia | 0                   | 68                   | 190                | 247                 |
| <b>seq1190</b> | Actinobacteria | Coriobacteriia | 0                   | 0                    | 0                  | 0                   |
| <b>seq1293</b> | Actinobacteria | Coriobacteriia | 0                   | 0                    | 0                  | 0                   |
| <b>seq1593</b> | Actinobacteria | Actinobacteria | 0                   | 0                    | 0                  | 0                   |
| <b>seq1867</b> | Actinobacteria | Actinobacteria | 0                   | 0                    | 0                  | 0                   |
| <b>seq1225</b> | Actinobacteria | Actinobacteria | 0                   | 0                    | 0                  | 0                   |
| <b>seq130</b>  | Actinobacteria | Coriobacteriia | 47                  | 165                  | 689                | 717                 |
| <b>seq754</b>  | Actinobacteria | Coriobacteriia | 0                   | 0                    | 0                  | 0                   |
| <b>seq148</b>  | Actinobacteria | Coriobacteriia | 0                   | 0                    | 43                 | 35                  |
| <b>seq356</b>  | Actinobacteria | Coriobacteriia | 0                   | 0                    | 0                  | 0                   |
| <b>seq519</b>  | Actinobacteria | Coriobacteriia | 271                 | 131                  | 0                  | 0                   |
| <b>seq315</b>  | Actinobacteria | Coriobacteriia | 0                   | 0                    | 0                  | 0                   |
| <b>seq360</b>  | Actinobacteria | Coriobacteriia | 0                   | 0                    | 88                 | 91                  |
| <b>seq910</b>  | Actinobacteria | Coriobacteriia | 0                   | 0                    | 0                  | 0                   |
| <b>seq1068</b> | Actinobacteria | Coriobacteriia | 0                   | 0                    | 0                  | 0                   |
| <b>seq1431</b> | Actinobacteria | Coriobacteriia | 0                   | 0                    | 0                  | 0                   |
| <b>seq1557</b> | Actinobacteria | Coriobacteriia | 0                   | 0                    | 0                  | 0                   |
| <b>seq1324</b> | Actinobacteria | Coriobacteriia | 0                   | 0                    | 0                  | 0                   |
| <b>seq184</b>  | Actinobacteria | Coriobacteriia | 0                   | 0                    | 0                  | 0                   |
| <b>seq421</b>  | Actinobacteria | Coriobacteriia | 0                   | 0                    | 0                  | 0                   |
| <b>seq222</b>  | Actinobacteria | Coriobacteriia | 411                 | 582                  | 0                  | 0                   |
| <b>seq396</b>  | Actinobacteria | Coriobacteriia | 0                   | 0                    | 0                  | 0                   |
| <b>seq451</b>  | Actinobacteria | Coriobacteriia | 0                   | 0                    | 0                  | 0                   |
| <b>seq642</b>  | Actinobacteria | Coriobacteriia | 0                   | 0                    | 0                  | 0                   |
| <b>seq767</b>  | Actinobacteria | Coriobacteriia | 0                   | 0                    | 0                  | 0                   |
| <b>seq1594</b> | Actinobacteria | Coriobacteriia | 0                   | 0                    | 0                  | 0                   |
| <b>seq1649</b> | Actinobacteria | Coriobacteriia | 0                   | 0                    | 0                  | 0                   |
| <b>seq1520</b> | Actinobacteria | Actinobacteria | 0                   | 0                    | 0                  | 0                   |
| <b>seq1728</b> | Actinobacteria | Actinobacteria | 0                   | 0                    | 0                  | 0                   |
| <b>seq1836</b> | Actinobacteria | Actinobacteria | 0                   | 0                    | 0                  | 0                   |



Sequence Count Table

|                | <b>Phylum</b>  | <b>Class</b>   | <b>Subject2WK0</b> | <b>Subject2WK12</b> | <b>Subject3WK0</b> | <b>Subject3WK12</b> |
|----------------|----------------|----------------|--------------------|---------------------|--------------------|---------------------|
| <b>seq885</b>  | Actinobacteria | Coriobacteriia | 0                  | 0                   | 0                  | 0                   |
| <b>seq1169</b> | Actinobacteria | Coriobacteriia | 0                  | 0                   | 50                 | 11                  |
| <b>seq248</b>  | Actinobacteria | Coriobacteriia | 127                | 506                 | 0                  | 0                   |
| <b>seq1190</b> | Actinobacteria | Coriobacteriia | 0                  | 0                   | 0                  | 0                   |
| <b>seq1293</b> | Actinobacteria | Coriobacteriia | 0                  | 0                   | 0                  | 0                   |
| <b>seq1593</b> | Actinobacteria | Actinobacteria | 0                  | 0                   | 0                  | 0                   |
| <b>seq1867</b> | Actinobacteria | Actinobacteria | 0                  | 0                   | 0                  | 0                   |
| <b>seq1225</b> | Actinobacteria | Actinobacteria | 0                  | 0                   | 0                  | 0                   |
| <b>seq130</b>  | Actinobacteria | Coriobacteriia | 181                | 712                 | 0                  | 0                   |
| <b>seq754</b>  | Actinobacteria | Coriobacteriia | 0                  | 60                  | 0                  | 0                   |
| <b>seq148</b>  | Actinobacteria | Coriobacteriia | 48                 | 428                 | 1166               | 180                 |
| <b>seq356</b>  | Actinobacteria | Coriobacteriia | 0                  | 0                   | 1323               | 94                  |
| <b>seq519</b>  | Actinobacteria | Coriobacteriia | 0                  | 0                   | 0                  | 0                   |
| <b>seq315</b>  | Actinobacteria | Coriobacteriia | 0                  | 0                   | 0                  | 0                   |
| <b>seq360</b>  | Actinobacteria | Coriobacteriia | 0                  | 0                   | 0                  | 0                   |
| <b>seq910</b>  | Actinobacteria | Coriobacteriia | 0                  | 0                   | 0                  | 0                   |
| <b>seq1068</b> | Actinobacteria | Coriobacteriia | 0                  | 0                   | 0                  | 0                   |
| <b>seq1431</b> | Actinobacteria | Coriobacteriia | 0                  | 0                   | 0                  | 0                   |
| <b>seq1557</b> | Actinobacteria | Coriobacteriia | 0                  | 0                   | 0                  | 0                   |
| <b>seq1324</b> | Actinobacteria | Coriobacteriia | 0                  | 0                   | 0                  | 0                   |
| <b>seq184</b>  | Actinobacteria | Coriobacteriia | 0                  | 0                   | 0                  | 0                   |
| <b>seq421</b>  | Actinobacteria | Coriobacteriia | 0                  | 0                   | 0                  | 0                   |
| <b>seq222</b>  | Actinobacteria | Coriobacteriia | 0                  | 0                   | 0                  | 0                   |
| <b>seq396</b>  | Actinobacteria | Coriobacteriia | 0                  | 0                   | 0                  | 0                   |
| <b>seq451</b>  | Actinobacteria | Coriobacteriia | 0                  | 0                   | 0                  | 0                   |
| <b>seq642</b>  | Actinobacteria | Coriobacteriia | 0                  | 0                   | 0                  | 0                   |
| <b>seq767</b>  | Actinobacteria | Coriobacteriia | 0                  | 0                   | 0                  | 0                   |
| <b>seq1594</b> | Actinobacteria | Coriobacteriia | 0                  | 0                   | 0                  | 0                   |
| <b>seq1649</b> | Actinobacteria | Coriobacteriia | 0                  | 0                   | 0                  | 0                   |
| <b>seq1520</b> | Actinobacteria | Actinobacteria | 0                  | 0                   | 0                  | 0                   |
| <b>seq1728</b> | Actinobacteria | Actinobacteria | 0                  | 0                   | 0                  | 0                   |
| <b>seq1836</b> | Actinobacteria | Actinobacteria | 0                  | 0                   | 0                  | 0                   |

Sequence Count Table

|                | <b>Phylum</b>  | <b>Class</b>   | <b>Subject4WK0</b> | <b>Subject4WK12</b> | <b>Subject5WK0</b> | <b>Subject5WK12</b> |
|----------------|----------------|----------------|--------------------|---------------------|--------------------|---------------------|
| <b>seq885</b>  | Actinobacteria | Coriobacteriia | 0                  | 0                   | 0                  | 0                   |
| <b>seq1169</b> | Actinobacteria | Coriobacteriia | 0                  | 0                   | 0                  | 0                   |
| <b>seq248</b>  | Actinobacteria | Coriobacteriia | 392                | 272                 | 0                  | 0                   |
| <b>seq1190</b> | Actinobacteria | Coriobacteriia | 0                  | 0                   | 0                  | 0                   |
| <b>seq1293</b> | Actinobacteria | Coriobacteriia | 0                  | 0                   | 0                  | 0                   |
| <b>seq1593</b> | Actinobacteria | Actinobacteria | 0                  | 0                   | 0                  | 0                   |
| <b>seq1867</b> | Actinobacteria | Actinobacteria | 0                  | 0                   | 0                  | 0                   |
| <b>seq1225</b> | Actinobacteria | Actinobacteria | 0                  | 0                   | 3                  | 59                  |
| <b>seq130</b>  | Actinobacteria | Coriobacteriia | 401                | 369                 | 284                | 76                  |
| <b>seq754</b>  | Actinobacteria | Coriobacteriia | 0                  | 0                   | 9                  | 0                   |
| <b>seq148</b>  | Actinobacteria | Coriobacteriia | 28                 | 28                  | 829                | 300                 |
| <b>seq356</b>  | Actinobacteria | Coriobacteriia | 0                  | 0                   | 0                  | 0                   |
| <b>seq519</b>  | Actinobacteria | Coriobacteriia | 0                  | 0                   | 0                  | 0                   |
| <b>seq315</b>  | Actinobacteria | Coriobacteriia | 497                | 430                 | 0                  | 0                   |
| <b>seq360</b>  | Actinobacteria | Coriobacteriia | 0                  | 0                   | 0                  | 0                   |
| <b>seq910</b>  | Actinobacteria | Coriobacteriia | 0                  | 0                   | 0                  | 0                   |
| <b>seq1068</b> | Actinobacteria | Coriobacteriia | 0                  | 0                   | 0                  | 0                   |
| <b>seq1431</b> | Actinobacteria | Coriobacteriia | 0                  | 0                   | 18                 | 19                  |
| <b>seq1557</b> | Actinobacteria | Coriobacteriia | 0                  | 0                   | 0                  | 0                   |
| <b>seq1324</b> | Actinobacteria | Coriobacteriia | 0                  | 0                   | 0                  | 0                   |
| <b>seq184</b>  | Actinobacteria | Coriobacteriia | 0                  | 0                   | 0                  | 0                   |
| <b>seq421</b>  | Actinobacteria | Coriobacteriia | 0                  | 0                   | 0                  | 0                   |
| <b>seq222</b>  | Actinobacteria | Coriobacteriia | 0                  | 0                   | 0                  | 0                   |
| <b>seq396</b>  | Actinobacteria | Coriobacteriia | 0                  | 0                   | 0                  | 0                   |
| <b>seq451</b>  | Actinobacteria | Coriobacteriia | 0                  | 0                   | 0                  | 0                   |
| <b>seq642</b>  | Actinobacteria | Coriobacteriia | 0                  | 0                   | 0                  | 0                   |
| <b>seq767</b>  | Actinobacteria | Coriobacteriia | 0                  | 0                   | 0                  | 0                   |
| <b>seq1594</b> | Actinobacteria | Coriobacteriia | 0                  | 0                   | 0                  | 0                   |
| <b>seq1649</b> | Actinobacteria | Coriobacteriia | 0                  | 0                   | 0                  | 0                   |
| <b>seq1520</b> | Actinobacteria | Actinobacteria | 0                  | 0                   | 0                  | 0                   |
| <b>seq1728</b> | Actinobacteria | Actinobacteria | 0                  | 0                   | 0                  | 0                   |
| <b>seq1836</b> | Actinobacteria | Actinobacteria | 0                  | 0                   | 0                  | 0                   |

Sequence Count Table

|                | <b>Phylum</b>  | <b>Class</b>   | <b>Subject6WK0</b> | <b>Subject6WK12</b> | <b>Subject18WK0</b> | <b>Subject18WK12</b> |
|----------------|----------------|----------------|--------------------|---------------------|---------------------|----------------------|
| <b>seq885</b>  | Actinobacteria | Coriobacteriia | 0                  | 0                   | 0                   | 0                    |
| <b>seq1169</b> | Actinobacteria | Coriobacteriia | 0                  | 0                   | 0                   | 0                    |
| <b>seq248</b>  | Actinobacteria | Coriobacteriia | 49                 | 177                 | 61                  | 33                   |
| <b>seq1190</b> | Actinobacteria | Coriobacteriia | 0                  | 0                   | 0                   | 0                    |
| <b>seq1293</b> | Actinobacteria | Coriobacteriia | 0                  | 0                   | 0                   | 0                    |
| <b>seq1593</b> | Actinobacteria | Actinobacteria | 0                  | 0                   | 0                   | 0                    |
| <b>seq1867</b> | Actinobacteria | Actinobacteria | 0                  | 0                   | 0                   | 0                    |
| <b>seq1225</b> | Actinobacteria | Actinobacteria | 0                  | 0                   | 0                   | 0                    |
| <b>seq130</b>  | Actinobacteria | Coriobacteriia | 144                | 308                 | 430                 | 287                  |
| <b>seq754</b>  | Actinobacteria | Coriobacteriia | 0                  | 0                   | 0                   | 0                    |
| <b>seq148</b>  | Actinobacteria | Coriobacteriia | 0                  | 0                   | 15                  | 13                   |
| <b>seq356</b>  | Actinobacteria | Coriobacteriia | 0                  | 0                   | 0                   | 0                    |
| <b>seq519</b>  | Actinobacteria | Coriobacteriia | 0                  | 0                   | 0                   | 0                    |
| <b>seq315</b>  | Actinobacteria | Coriobacteriia | 0                  | 0                   | 0                   | 0                    |
| <b>seq360</b>  | Actinobacteria | Coriobacteriia | 0                  | 7                   | 29                  | 0                    |
| <b>seq910</b>  | Actinobacteria | Coriobacteriia | 0                  | 0                   | 0                   | 0                    |
| <b>seq1068</b> | Actinobacteria | Coriobacteriia | 0                  | 0                   | 0                   | 32                   |
| <b>seq1431</b> | Actinobacteria | Coriobacteriia | 0                  | 0                   | 0                   | 0                    |
| <b>seq1557</b> | Actinobacteria | Coriobacteriia | 0                  | 0                   | 0                   | 0                    |
| <b>seq1324</b> | Actinobacteria | Coriobacteriia | 0                  | 0                   | 0                   | 0                    |
| <b>seq184</b>  | Actinobacteria | Coriobacteriia | 264                | 962                 | 0                   | 0                    |
| <b>seq421</b>  | Actinobacteria | Coriobacteriia | 0                  | 0                   | 0                   | 0                    |
| <b>seq222</b>  | Actinobacteria | Coriobacteriia | 238                | 539                 | 170                 | 222                  |
| <b>seq396</b>  | Actinobacteria | Coriobacteriia | 0                  | 0                   | 0                   | 0                    |
| <b>seq451</b>  | Actinobacteria | Coriobacteriia | 228                | 767                 | 0                   | 0                    |
| <b>seq642</b>  | Actinobacteria | Coriobacteriia | 0                  | 0                   | 0                   | 0                    |
| <b>seq767</b>  | Actinobacteria | Coriobacteriia | 0                  | 0                   | 0                   | 0                    |
| <b>seq1594</b> | Actinobacteria | Coriobacteriia | 0                  | 0                   | 0                   | 0                    |
| <b>seq1649</b> | Actinobacteria | Coriobacteriia | 0                  | 0                   | 0                   | 0                    |
| <b>seq1520</b> | Actinobacteria | Actinobacteria | 0                  | 0                   | 0                   | 0                    |
| <b>seq1728</b> | Actinobacteria | Actinobacteria | 0                  | 0                   | 0                   | 0                    |
| <b>seq1836</b> | Actinobacteria | Actinobacteria | 0                  | 0                   | 0                   | 0                    |

Sequence Count Table

|                | <b>Phylum</b>  | <b>Class</b>   | <b>Subject19WK0</b> | <b>Subject19WK12</b> | <b>Subject20WK0</b> | <b>Subject20WK12</b> |
|----------------|----------------|----------------|---------------------|----------------------|---------------------|----------------------|
| <b>seq885</b>  | Actinobacteria | Coriobacteriia | 15                  | 16                   | 0                   | 0                    |
| <b>seq1169</b> | Actinobacteria | Coriobacteriia | 0                   | 0                    | 0                   | 0                    |
| <b>seq248</b>  | Actinobacteria | Coriobacteriia | 17                  | 64                   | 0                   | 0                    |
| <b>seq1190</b> | Actinobacteria | Coriobacteriia | 0                   | 0                    | 0                   | 0                    |
| <b>seq1293</b> | Actinobacteria | Coriobacteriia | 0                   | 0                    | 0                   | 0                    |
| <b>seq1593</b> | Actinobacteria | Actinobacteria | 0                   | 0                    | 0                   | 20                   |
| <b>seq1867</b> | Actinobacteria | Actinobacteria | 0                   | 0                    | 0                   | 0                    |
| <b>seq1225</b> | Actinobacteria | Actinobacteria | 0                   | 0                    | 0                   | 7                    |
| <b>seq130</b>  | Actinobacteria | Coriobacteriia | 0                   | 0                    | 51                  | 159                  |
| <b>seq754</b>  | Actinobacteria | Coriobacteriia | 28                  | 30                   | 0                   | 0                    |
| <b>seq148</b>  | Actinobacteria | Coriobacteriia | 437                 | 411                  | 0                   | 0                    |
| <b>seq356</b>  | Actinobacteria | Coriobacteriia | 0                   | 0                    | 0                   | 0                    |
| <b>seq519</b>  | Actinobacteria | Coriobacteriia | 0                   | 0                    | 0                   | 0                    |
| <b>seq315</b>  | Actinobacteria | Coriobacteriia | 0                   | 0                    | 175                 | 134                  |
| <b>seq360</b>  | Actinobacteria | Coriobacteriia | 0                   | 0                    | 0                   | 0                    |
| <b>seq910</b>  | Actinobacteria | Coriobacteriia | 0                   | 0                    | 0                   | 0                    |
| <b>seq1068</b> | Actinobacteria | Coriobacteriia | 0                   | 0                    | 0                   | 0                    |
| <b>seq1431</b> | Actinobacteria | Coriobacteriia | 0                   | 0                    | 0                   | 0                    |
| <b>seq1557</b> | Actinobacteria | Coriobacteriia | 0                   | 0                    | 0                   | 0                    |
| <b>seq1324</b> | Actinobacteria | Coriobacteriia | 0                   | 0                    | 0                   | 0                    |
| <b>seq184</b>  | Actinobacteria | Coriobacteriia | 0                   | 0                    | 0                   | 0                    |
| <b>seq421</b>  | Actinobacteria | Coriobacteriia | 0                   | 0                    | 0                   | 0                    |
| <b>seq222</b>  | Actinobacteria | Coriobacteriia | 0                   | 0                    | 0                   | 0                    |
| <b>seq396</b>  | Actinobacteria | Coriobacteriia | 0                   | 0                    | 0                   | 0                    |
| <b>seq451</b>  | Actinobacteria | Coriobacteriia | 0                   | 0                    | 0                   | 0                    |
| <b>seq642</b>  | Actinobacteria | Coriobacteriia | 0                   | 0                    | 168                 | 110                  |
| <b>seq767</b>  | Actinobacteria | Coriobacteriia | 0                   | 0                    | 0                   | 0                    |
| <b>seq1594</b> | Actinobacteria | Coriobacteriia | 0                   | 0                    | 0                   | 0                    |
| <b>seq1649</b> | Actinobacteria | Coriobacteriia | 0                   | 0                    | 0                   | 0                    |
| <b>seq1520</b> | Actinobacteria | Actinobacteria | 0                   | 0                    | 0                   | 0                    |
| <b>seq1728</b> | Actinobacteria | Actinobacteria | 0                   | 0                    | 0                   | 0                    |
| <b>seq1836</b> | Actinobacteria | Actinobacteria | 0                   | 0                    | 0                   | 0                    |

Sequence Count Table

|                | <b>Phylum</b>  | <b>Class</b>   | <b>Subject7WK0</b> | <b>Subject7WK12</b> | <b>Subject21WK0</b> | <b>Subject21WK12</b> |
|----------------|----------------|----------------|--------------------|---------------------|---------------------|----------------------|
| <b>seq885</b>  | Actinobacteria | Coriobacteriia | 0                  | 0                   | 0                   | 0                    |
| <b>seq1169</b> | Actinobacteria | Coriobacteriia | 0                  | 0                   | 0                   | 9                    |
| <b>seq248</b>  | Actinobacteria | Coriobacteriia | 0                  | 0                   | 0                   | 0                    |
| <b>seq1190</b> | Actinobacteria | Coriobacteriia | 0                  | 0                   | 0                   | 0                    |
| <b>seq1293</b> | Actinobacteria | Coriobacteriia | 0                  | 0                   | 0                   | 0                    |
| <b>seq1593</b> | Actinobacteria | Actinobacteria | 0                  | 0                   | 0                   | 0                    |
| <b>seq1867</b> | Actinobacteria | Actinobacteria | 0                  | 0                   | 0                   | 0                    |
| <b>seq1225</b> | Actinobacteria | Actinobacteria | 0                  | 0                   | 0                   | 0                    |
| <b>seq130</b>  | Actinobacteria | Coriobacteriia | 1216               | 582                 | 0                   | 0                    |
| <b>seq754</b>  | Actinobacteria | Coriobacteriia | 56                 | 12                  | 0                   | 0                    |
| <b>seq148</b>  | Actinobacteria | Coriobacteriia | 96                 | 39                  | 513                 | 1410                 |
| <b>seq356</b>  | Actinobacteria | Coriobacteriia | 0                  | 0                   | 0                   | 0                    |
| <b>seq519</b>  | Actinobacteria | Coriobacteriia | 0                  | 0                   | 0                   | 0                    |
| <b>seq315</b>  | Actinobacteria | Coriobacteriia | 0                  | 0                   | 0                   | 0                    |
| <b>seq360</b>  | Actinobacteria | Coriobacteriia | 84                 | 32                  | 24                  | 163                  |
| <b>seq910</b>  | Actinobacteria | Coriobacteriia | 0                  | 0                   | 0                   | 0                    |
| <b>seq1068</b> | Actinobacteria | Coriobacteriia | 0                  | 0                   | 0                   | 0                    |
| <b>seq1431</b> | Actinobacteria | Coriobacteriia | 0                  | 0                   | 0                   | 0                    |
| <b>seq1557</b> | Actinobacteria | Coriobacteriia | 0                  | 0                   | 0                   | 0                    |
| <b>seq1324</b> | Actinobacteria | Coriobacteriia | 52                 | 0                   | 0                   | 0                    |
| <b>seq184</b>  | Actinobacteria | Coriobacteriia | 0                  | 0                   | 0                   | 0                    |
| <b>seq421</b>  | Actinobacteria | Coriobacteriia | 0                  | 0                   | 0                   | 0                    |
| <b>seq222</b>  | Actinobacteria | Coriobacteriia | 0                  | 0                   | 0                   | 0                    |
| <b>seq396</b>  | Actinobacteria | Coriobacteriia | 0                  | 0                   | 0                   | 0                    |
| <b>seq451</b>  | Actinobacteria | Coriobacteriia | 0                  | 0                   | 0                   | 0                    |
| <b>seq642</b>  | Actinobacteria | Coriobacteriia | 0                  | 0                   | 0                   | 0                    |
| <b>seq767</b>  | Actinobacteria | Coriobacteriia | 0                  | 0                   | 0                   | 0                    |
| <b>seq1594</b> | Actinobacteria | Coriobacteriia | 20                 | 0                   | 0                   | 0                    |
| <b>seq1649</b> | Actinobacteria | Coriobacteriia | 0                  | 0                   | 0                   | 0                    |
| <b>seq1520</b> | Actinobacteria | Actinobacteria | 0                  | 0                   | 0                   | 0                    |
| <b>seq1728</b> | Actinobacteria | Actinobacteria | 0                  | 0                   | 0                   | 0                    |
| <b>seq1836</b> | Actinobacteria | Actinobacteria | 0                  | 0                   | 0                   | 0                    |

Sequence Count Table

|                | <b>Phylum</b>  | <b>Class</b>   | <b>Subject8WK0</b> | <b>Subject8WK12</b> | <b>Subject9WK0</b> | <b>Subject9WK12</b> |
|----------------|----------------|----------------|--------------------|---------------------|--------------------|---------------------|
| <b>seq885</b>  | Actinobacteria | Coriobacteriia | 0                  | 0                   | 0                  | 0                   |
| <b>seq1169</b> | Actinobacteria | Coriobacteriia | 0                  | 0                   | 0                  | 0                   |
| <b>seq248</b>  | Actinobacteria | Coriobacteriia | 81                 | 55                  | 52                 | 0                   |
| <b>seq1190</b> | Actinobacteria | Coriobacteriia | 0                  | 0                   | 0                  | 0                   |
| <b>seq1293</b> | Actinobacteria | Coriobacteriia | 0                  | 0                   | 0                  | 0                   |
| <b>seq1593</b> | Actinobacteria | Actinobacteria | 0                  | 0                   | 0                  | 0                   |
| <b>seq1867</b> | Actinobacteria | Actinobacteria | 0                  | 0                   | 0                  | 0                   |
| <b>seq1225</b> | Actinobacteria | Actinobacteria | 0                  | 0                   | 0                  | 3                   |
| <b>seq130</b>  | Actinobacteria | Coriobacteriia | 406                | 443                 | 270                | 0                   |
| <b>seq754</b>  | Actinobacteria | Coriobacteriia | 0                  | 0                   | 0                  | 0                   |
| <b>seq148</b>  | Actinobacteria | Coriobacteriia | 0                  | 37                  | 138                | 40                  |
| <b>seq356</b>  | Actinobacteria | Coriobacteriia | 0                  | 0                   | 0                  | 0                   |
| <b>seq519</b>  | Actinobacteria | Coriobacteriia | 0                  | 0                   | 0                  | 0                   |
| <b>seq315</b>  | Actinobacteria | Coriobacteriia | 0                  | 0                   | 0                  | 0                   |
| <b>seq360</b>  | Actinobacteria | Coriobacteriia | 25                 | 0                   | 0                  | 0                   |
| <b>seq910</b>  | Actinobacteria | Coriobacteriia | 24                 | 26                  | 0                  | 0                   |
| <b>seq1068</b> | Actinobacteria | Coriobacteriia | 0                  | 0                   | 41                 | 0                   |
| <b>seq1431</b> | Actinobacteria | Coriobacteriia | 0                  | 0                   | 0                  | 0                   |
| <b>seq1557</b> | Actinobacteria | Coriobacteriia | 0                  | 0                   | 0                  | 0                   |
| <b>seq1324</b> | Actinobacteria | Coriobacteriia | 0                  | 0                   | 0                  | 0                   |
| <b>seq184</b>  | Actinobacteria | Coriobacteriia | 0                  | 0                   | 0                  | 0                   |
| <b>seq421</b>  | Actinobacteria | Coriobacteriia | 0                  | 0                   | 0                  | 0                   |
| <b>seq222</b>  | Actinobacteria | Coriobacteriia | 0                  | 0                   | 0                  | 0                   |
| <b>seq396</b>  | Actinobacteria | Coriobacteriia | 0                  | 0                   | 0                  | 0                   |
| <b>seq451</b>  | Actinobacteria | Coriobacteriia | 0                  | 0                   | 0                  | 0                   |
| <b>seq642</b>  | Actinobacteria | Coriobacteriia | 0                  | 0                   | 0                  | 0                   |
| <b>seq767</b>  | Actinobacteria | Coriobacteriia | 0                  | 0                   | 0                  | 0                   |
| <b>seq1594</b> | Actinobacteria | Coriobacteriia | 0                  | 0                   | 0                  | 0                   |
| <b>seq1649</b> | Actinobacteria | Coriobacteriia | 0                  | 0                   | 0                  | 0                   |
| <b>seq1520</b> | Actinobacteria | Actinobacteria | 0                  | 0                   | 0                  | 0                   |
| <b>seq1728</b> | Actinobacteria | Actinobacteria | 0                  | 0                   | 0                  | 0                   |
| <b>seq1836</b> | Actinobacteria | Actinobacteria | 0                  | 0                   | 0                  | 0                   |

Sequence Count Table

|                | <b>Phylum</b>  | <b>Class</b>   | <b>Subject10WK0</b> | <b>Subject10WK12</b> | <b>Subject22WK0</b> | <b>Subject22WK12</b> |
|----------------|----------------|----------------|---------------------|----------------------|---------------------|----------------------|
| <b>seq885</b>  | Actinobacteria | Coriobacteriia | 0                   | 0                    | 0                   | 0                    |
| <b>seq1169</b> | Actinobacteria | Coriobacteriia | 0                   | 0                    | 0                   | 0                    |
| <b>seq248</b>  | Actinobacteria | Coriobacteriia | 170                 | 55                   | 31                  | 36                   |
| <b>seq1190</b> | Actinobacteria | Coriobacteriia | 0                   | 0                    | 31                  | 28                   |
| <b>seq1293</b> | Actinobacteria | Coriobacteriia | 0                   | 0                    | 0                   | 0                    |
| <b>seq1593</b> | Actinobacteria | Actinobacteria | 0                   | 0                    | 0                   | 0                    |
| <b>seq1867</b> | Actinobacteria | Actinobacteria | 0                   | 0                    | 0                   | 0                    |
| <b>seq1225</b> | Actinobacteria | Actinobacteria | 0                   | 0                    | 0                   | 0                    |
| <b>seq130</b>  | Actinobacteria | Coriobacteriia | 305                 | 37                   | 0                   | 0                    |
| <b>seq754</b>  | Actinobacteria | Coriobacteriia | 0                   | 0                    | 0                   | 0                    |
| <b>seq148</b>  | Actinobacteria | Coriobacteriia | 34                  | 0                    | 0                   | 0                    |
| <b>seq356</b>  | Actinobacteria | Coriobacteriia | 0                   | 0                    | 0                   | 0                    |
| <b>seq519</b>  | Actinobacteria | Coriobacteriia | 0                   | 0                    | 0                   | 0                    |
| <b>seq315</b>  | Actinobacteria | Coriobacteriia | 0                   | 0                    | 0                   | 0                    |
| <b>seq360</b>  | Actinobacteria | Coriobacteriia | 30                  | 14                   | 0                   | 0                    |
| <b>seq910</b>  | Actinobacteria | Coriobacteriia | 72                  | 0                    | 0                   | 0                    |
| <b>seq1068</b> | Actinobacteria | Coriobacteriia | 0                   | 0                    | 0                   | 0                    |
| <b>seq1431</b> | Actinobacteria | Coriobacteriia | 0                   | 0                    | 0                   | 0                    |
| <b>seq1557</b> | Actinobacteria | Coriobacteriia | 0                   | 0                    | 0                   | 0                    |
| <b>seq1324</b> | Actinobacteria | Coriobacteriia | 0                   | 0                    | 0                   | 0                    |
| <b>seq184</b>  | Actinobacteria | Coriobacteriia | 0                   | 0                    | 462                 | 300                  |
| <b>seq421</b>  | Actinobacteria | Coriobacteriia | 0                   | 0                    | 241                 | 147                  |
| <b>seq222</b>  | Actinobacteria | Coriobacteriia | 0                   | 0                    | 351                 | 454                  |
| <b>seq396</b>  | Actinobacteria | Coriobacteriia | 1108                | 154                  | 0                   | 0                    |
| <b>seq451</b>  | Actinobacteria | Coriobacteriia | 0                   | 0                    | 0                   | 0                    |
| <b>seq642</b>  | Actinobacteria | Coriobacteriia | 0                   | 0                    | 0                   | 0                    |
| <b>seq767</b>  | Actinobacteria | Coriobacteriia | 0                   | 0                    | 187                 | 113                  |
| <b>seq1594</b> | Actinobacteria | Coriobacteriia | 0                   | 0                    | 0                   | 0                    |
| <b>seq1649</b> | Actinobacteria | Coriobacteriia | 0                   | 0                    | 0                   | 0                    |
| <b>seq1520</b> | Actinobacteria | Actinobacteria | 0                   | 0                    | 0                   | 0                    |
| <b>seq1728</b> | Actinobacteria | Actinobacteria | 0                   | 0                    | 11                  | 0                    |
| <b>seq1836</b> | Actinobacteria | Actinobacteria | 0                   | 0                    | 0                   | 0                    |

Sequence Count Table

|                | <b>Phylum</b>  | <b>Class</b>   | <b>Subject23WK0</b> | <b>Subject23WK12</b> | <b>Subject24WK0</b> | <b>Subject24WK12</b> |
|----------------|----------------|----------------|---------------------|----------------------|---------------------|----------------------|
| <b>seq885</b>  | Actinobacteria | Coriobacteriia | 0                   | 0                    | 0                   | 4                    |
| <b>seq1169</b> | Actinobacteria | Coriobacteriia | 0                   | 0                    | 0                   | 0                    |
| <b>seq248</b>  | Actinobacteria | Coriobacteriia | 156                 | 225                  | 54                  | 23                   |
| <b>seq1190</b> | Actinobacteria | Coriobacteriia | 0                   | 0                    | 0                   | 0                    |
| <b>seq1293</b> | Actinobacteria | Coriobacteriia | 0                   | 0                    | 0                   | 0                    |
| <b>seq1593</b> | Actinobacteria | Actinobacteria | 0                   | 0                    | 0                   | 0                    |
| <b>seq1867</b> | Actinobacteria | Actinobacteria | 0                   | 0                    | 0                   | 0                    |
| <b>seq1225</b> | Actinobacteria | Actinobacteria | 0                   | 0                    | 0                   | 0                    |
| <b>seq130</b>  | Actinobacteria | Coriobacteriia | 139                 | 210                  | 125                 | 125                  |
| <b>seq754</b>  | Actinobacteria | Coriobacteriia | 0                   | 0                    | 0                   | 0                    |
| <b>seq148</b>  | Actinobacteria | Coriobacteriia | 30                  | 25                   | 8                   | 0                    |
| <b>seq356</b>  | Actinobacteria | Coriobacteriia | 0                   | 0                    | 0                   | 0                    |
| <b>seq519</b>  | Actinobacteria | Coriobacteriia | 0                   | 0                    | 0                   | 0                    |
| <b>seq315</b>  | Actinobacteria | Coriobacteriia | 0                   | 0                    | 0                   | 0                    |
| <b>seq360</b>  | Actinobacteria | Coriobacteriia | 45                  | 84                   | 0                   | 78                   |
| <b>seq910</b>  | Actinobacteria | Coriobacteriia | 0                   | 0                    | 0                   | 0                    |
| <b>seq1068</b> | Actinobacteria | Coriobacteriia | 0                   | 0                    | 0                   | 0                    |
| <b>seq1431</b> | Actinobacteria | Coriobacteriia | 0                   | 0                    | 0                   | 0                    |
| <b>seq1557</b> | Actinobacteria | Coriobacteriia | 0                   | 0                    | 23                  | 0                    |
| <b>seq1324</b> | Actinobacteria | Coriobacteriia | 0                   | 0                    | 0                   | 0                    |
| <b>seq184</b>  | Actinobacteria | Coriobacteriia | 0                   | 0                    | 986                 | 530                  |
| <b>seq421</b>  | Actinobacteria | Coriobacteriia | 0                   | 0                    | 0                   | 0                    |
| <b>seq222</b>  | Actinobacteria | Coriobacteriia | 0                   | 0                    | 0                   | 0                    |
| <b>seq396</b>  | Actinobacteria | Coriobacteriia | 0                   | 0                    | 0                   | 0                    |
| <b>seq451</b>  | Actinobacteria | Coriobacteriia | 0                   | 0                    | 0                   | 0                    |
| <b>seq642</b>  | Actinobacteria | Coriobacteriia | 0                   | 0                    | 0                   | 0                    |
| <b>seq767</b>  | Actinobacteria | Coriobacteriia | 0                   | 0                    | 0                   | 0                    |
| <b>seq1594</b> | Actinobacteria | Coriobacteriia | 0                   | 0                    | 0                   | 0                    |
| <b>seq1649</b> | Actinobacteria | Coriobacteriia | 0                   | 0                    | 16                  | 0                    |
| <b>seq1520</b> | Actinobacteria | Actinobacteria | 0                   | 0                    | 0                   | 0                    |
| <b>seq1728</b> | Actinobacteria | Actinobacteria | 0                   | 0                    | 0                   | 0                    |
| <b>seq1836</b> | Actinobacteria | Actinobacteria | 0                   | 0                    | 0                   | 0                    |



Sequence Count Table

|                | <b>Phylum</b>  | <b>Class</b>   | <b>Subject11WK0</b> | <b>Subject11WK12</b> | <b>Subject12WK0</b> | <b>Subject12WK12</b> |
|----------------|----------------|----------------|---------------------|----------------------|---------------------|----------------------|
| <b>seq885</b>  | Actinobacteria | Coriobacteriia | 0                   | 0                    | 0                   | 0                    |
| <b>seq1169</b> | Actinobacteria | Coriobacteriia | 0                   | 0                    | 0                   | 0                    |
| <b>seq248</b>  | Actinobacteria | Coriobacteriia | 0                   | 0                    | 32                  | 0                    |
| <b>seq1190</b> | Actinobacteria | Coriobacteriia | 0                   | 0                    | 0                   | 0                    |
| <b>seq1293</b> | Actinobacteria | Coriobacteriia | 0                   | 0                    | 0                   | 0                    |
| <b>seq1593</b> | Actinobacteria | Actinobacteria | 0                   | 0                    | 0                   | 0                    |
| <b>seq1867</b> | Actinobacteria | Actinobacteria | 0                   | 0                    | 0                   | 0                    |
| <b>seq1225</b> | Actinobacteria | Actinobacteria | 0                   | 0                    | 0                   | 0                    |
| <b>seq130</b>  | Actinobacteria | Coriobacteriia | 188                 | 32                   | 0                   | 0                    |
| <b>seq754</b>  | Actinobacteria | Coriobacteriia | 0                   | 0                    | 0                   | 0                    |
| <b>seq148</b>  | Actinobacteria | Coriobacteriia | 516                 | 268                  | 0                   | 0                    |
| <b>seq356</b>  | Actinobacteria | Coriobacteriia | 0                   | 0                    | 0                   | 0                    |
| <b>seq519</b>  | Actinobacteria | Coriobacteriia | 0                   | 0                    | 0                   | 0                    |
| <b>seq315</b>  | Actinobacteria | Coriobacteriia | 0                   | 0                    | 184                 | 188                  |
| <b>seq360</b>  | Actinobacteria | Coriobacteriia | 93                  | 32                   | 0                   | 0                    |
| <b>seq910</b>  | Actinobacteria | Coriobacteriia | 0                   | 0                    | 0                   | 0                    |
| <b>seq1068</b> | Actinobacteria | Coriobacteriia | 0                   | 0                    | 0                   | 0                    |
| <b>seq1431</b> | Actinobacteria | Coriobacteriia | 0                   | 0                    | 0                   | 0                    |
| <b>seq1557</b> | Actinobacteria | Coriobacteriia | 0                   | 0                    | 0                   | 0                    |
| <b>seq1324</b> | Actinobacteria | Coriobacteriia | 0                   | 0                    | 0                   | 0                    |
| <b>seq184</b>  | Actinobacteria | Coriobacteriia | 0                   | 0                    | 436                 | 454                  |
| <b>seq421</b>  | Actinobacteria | Coriobacteriia | 0                   | 0                    | 0                   | 174                  |
| <b>seq222</b>  | Actinobacteria | Coriobacteriia | 0                   | 0                    | 0                   | 0                    |
| <b>seq396</b>  | Actinobacteria | Coriobacteriia | 0                   | 0                    | 0                   | 0                    |
| <b>seq451</b>  | Actinobacteria | Coriobacteriia | 0                   | 0                    | 0                   | 0                    |
| <b>seq642</b>  | Actinobacteria | Coriobacteriia | 0                   | 0                    | 0                   | 0                    |
| <b>seq767</b>  | Actinobacteria | Coriobacteriia | 0                   | 0                    | 0                   | 0                    |
| <b>seq1594</b> | Actinobacteria | Coriobacteriia | 0                   | 0                    | 0                   | 0                    |
| <b>seq1649</b> | Actinobacteria | Coriobacteriia | 0                   | 0                    | 0                   | 0                    |
| <b>seq1520</b> | Actinobacteria | Actinobacteria | 0                   | 0                    | 0                   | 0                    |
| <b>seq1728</b> | Actinobacteria | Actinobacteria | 0                   | 0                    | 0                   | 0                    |
| <b>seq1836</b> | Actinobacteria | Actinobacteria | 0                   | 6                    | 0                   | 0                    |

Sequence Count Table

|                | <b>Phylum</b>  | <b>Class</b>   | <b>Subject25WK0</b> | <b>Subject25WK12</b> | <b>Subject38WK0</b> | <b>Subject38WK12</b> |
|----------------|----------------|----------------|---------------------|----------------------|---------------------|----------------------|
| <b>seq885</b>  | Actinobacteria | Coriobacteriia | 0                   | 0                    | 0                   | 0                    |
| <b>seq1169</b> | Actinobacteria | Coriobacteriia | 0                   | 0                    | 0                   | 0                    |
| <b>seq248</b>  | Actinobacteria | Coriobacteriia | 67                  | 0                    | 0                   | 0                    |
| <b>seq1190</b> | Actinobacteria | Coriobacteriia | 25                  | 0                    | 0                   | 0                    |
| <b>seq1293</b> | Actinobacteria | Coriobacteriia | 0                   | 0                    | 0                   | 0                    |
| <b>seq1593</b> | Actinobacteria | Actinobacteria | 0                   | 0                    | 0                   | 0                    |
| <b>seq1867</b> | Actinobacteria | Actinobacteria | 0                   | 0                    | 0                   | 0                    |
| <b>seq1225</b> | Actinobacteria | Actinobacteria | 0                   | 0                    | 0                   | 0                    |
| <b>seq130</b>  | Actinobacteria | Coriobacteriia | 274                 | 34                   | 0                   | 0                    |
| <b>seq754</b>  | Actinobacteria | Coriobacteriia | 47                  | 0                    | 0                   | 0                    |
| <b>seq148</b>  | Actinobacteria | Coriobacteriia | 49                  | 129                  | 0                   | 0                    |
| <b>seq356</b>  | Actinobacteria | Coriobacteriia | 0                   | 0                    | 0                   | 0                    |
| <b>seq519</b>  | Actinobacteria | Coriobacteriia | 0                   | 0                    | 0                   | 0                    |
| <b>seq315</b>  | Actinobacteria | Coriobacteriia | 0                   | 0                    | 0                   | 0                    |
| <b>seq360</b>  | Actinobacteria | Coriobacteriia | 21                  | 51                   | 0                   | 0                    |
| <b>seq910</b>  | Actinobacteria | Coriobacteriia | 0                   | 0                    | 0                   | 0                    |
| <b>seq1068</b> | Actinobacteria | Coriobacteriia | 0                   | 0                    | 0                   | 0                    |
| <b>seq1431</b> | Actinobacteria | Coriobacteriia | 0                   | 0                    | 0                   | 0                    |
| <b>seq1557</b> | Actinobacteria | Coriobacteriia | 0                   | 0                    | 0                   | 0                    |
| <b>seq1324</b> | Actinobacteria | Coriobacteriia | 0                   | 0                    | 0                   | 0                    |
| <b>seq184</b>  | Actinobacteria | Coriobacteriia | 0                   | 0                    | 0                   | 0                    |
| <b>seq421</b>  | Actinobacteria | Coriobacteriia | 0                   | 0                    | 0                   | 0                    |
| <b>seq222</b>  | Actinobacteria | Coriobacteriia | 0                   | 0                    | 0                   | 0                    |
| <b>seq396</b>  | Actinobacteria | Coriobacteriia | 0                   | 0                    | 0                   | 0                    |
| <b>seq451</b>  | Actinobacteria | Coriobacteriia | 0                   | 0                    | 0                   | 0                    |
| <b>seq642</b>  | Actinobacteria | Coriobacteriia | 0                   | 0                    | 0                   | 0                    |
| <b>seq767</b>  | Actinobacteria | Coriobacteriia | 0                   | 0                    | 0                   | 0                    |
| <b>seq1594</b> | Actinobacteria | Coriobacteriia | 0                   | 0                    | 0                   | 0                    |
| <b>seq1649</b> | Actinobacteria | Coriobacteriia | 0                   | 0                    | 0                   | 0                    |
| <b>seq1520</b> | Actinobacteria | Actinobacteria | 0                   | 0                    | 0                   | 0                    |
| <b>seq1728</b> | Actinobacteria | Actinobacteria | 0                   | 0                    | 0                   | 0                    |
| <b>seq1836</b> | Actinobacteria | Actinobacteria | 0                   | 0                    | 0                   | 0                    |

Sequence Count Table

|                | <b>Phylum</b>  | <b>Class</b>   | <b>Subject31WK0</b> | <b>Subject31WK12</b> | <b>Subject32WK0</b> | <b>Subject32WK12</b> |
|----------------|----------------|----------------|---------------------|----------------------|---------------------|----------------------|
| <b>seq885</b>  | Actinobacteria | Coriobacteriia | 0                   | 0                    | 0                   | 0                    |
| <b>seq1169</b> | Actinobacteria | Coriobacteriia | 0                   | 0                    | 0                   | 0                    |
| <b>seq248</b>  | Actinobacteria | Coriobacteriia | 0                   | 0                    | 0                   | 0                    |
| <b>seq1190</b> | Actinobacteria | Coriobacteriia | 0                   | 0                    | 0                   | 0                    |
| <b>seq1293</b> | Actinobacteria | Coriobacteriia | 0                   | 0                    | 0                   | 0                    |
| <b>seq1593</b> | Actinobacteria | Actinobacteria | 0                   | 0                    | 0                   | 0                    |
| <b>seq1867</b> | Actinobacteria | Actinobacteria | 0                   | 0                    | 5                   | 0                    |
| <b>seq1225</b> | Actinobacteria | Actinobacteria | 0                   | 0                    | 0                   | 0                    |
| <b>seq130</b>  | Actinobacteria | Coriobacteriia | 0                   | 0                    | 131                 | 0                    |
| <b>seq754</b>  | Actinobacteria | Coriobacteriia | 0                   | 0                    | 0                   | 0                    |
| <b>seq148</b>  | Actinobacteria | Coriobacteriia | 0                   | 0                    | 113                 | 0                    |
| <b>seq356</b>  | Actinobacteria | Coriobacteriia | 0                   | 0                    | 0                   | 0                    |
| <b>seq519</b>  | Actinobacteria | Coriobacteriia | 0                   | 0                    | 0                   | 0                    |
| <b>seq315</b>  | Actinobacteria | Coriobacteriia | 0                   | 0                    | 0                   | 0                    |
| <b>seq360</b>  | Actinobacteria | Coriobacteriia | 0                   | 0                    | 33                  | 0                    |
| <b>seq910</b>  | Actinobacteria | Coriobacteriia | 0                   | 0                    | 0                   | 0                    |
| <b>seq1068</b> | Actinobacteria | Coriobacteriia | 0                   | 0                    | 0                   | 0                    |
| <b>seq1431</b> | Actinobacteria | Coriobacteriia | 0                   | 0                    | 0                   | 0                    |
| <b>seq1557</b> | Actinobacteria | Coriobacteriia | 0                   | 0                    | 0                   | 0                    |
| <b>seq1324</b> | Actinobacteria | Coriobacteriia | 0                   | 0                    | 0                   | 0                    |
| <b>seq184</b>  | Actinobacteria | Coriobacteriia | 0                   | 0                    | 0                   | 0                    |
| <b>seq421</b>  | Actinobacteria | Coriobacteriia | 0                   | 0                    | 0                   | 0                    |
| <b>seq222</b>  | Actinobacteria | Coriobacteriia | 0                   | 0                    | 0                   | 0                    |
| <b>seq396</b>  | Actinobacteria | Coriobacteriia | 0                   | 0                    | 0                   | 0                    |
| <b>seq451</b>  | Actinobacteria | Coriobacteriia | 0                   | 0                    | 0                   | 0                    |
| <b>seq642</b>  | Actinobacteria | Coriobacteriia | 0                   | 0                    | 0                   | 0                    |
| <b>seq767</b>  | Actinobacteria | Coriobacteriia | 0                   | 0                    | 0                   | 0                    |
| <b>seq1594</b> | Actinobacteria | Coriobacteriia | 0                   | 0                    | 0                   | 0                    |
| <b>seq1649</b> | Actinobacteria | Coriobacteriia | 0                   | 0                    | 0                   | 0                    |
| <b>seq1520</b> | Actinobacteria | Actinobacteria | 0                   | 0                    | 0                   | 0                    |
| <b>seq1728</b> | Actinobacteria | Actinobacteria | 0                   | 0                    | 0                   | 0                    |
| <b>seq1836</b> | Actinobacteria | Actinobacteria | 0                   | 0                    | 0                   | 0                    |

Sequence Count Table

|                | <b>Phylum</b>  | <b>Class</b>   | <b>Subject13WK0</b> | <b>Subject13WK12</b> | <b>Subject39WK0</b> | <b>Subject39WK12</b> |
|----------------|----------------|----------------|---------------------|----------------------|---------------------|----------------------|
| <b>seq885</b>  | Actinobacteria | Coriobacteriia | 0                   | 0                    | 0                   | 0                    |
| <b>seq1169</b> | Actinobacteria | Coriobacteriia | 0                   | 0                    | 0                   | 0                    |
| <b>seq248</b>  | Actinobacteria | Coriobacteriia | 20                  | 20                   | 0                   | 29                   |
| <b>seq1190</b> | Actinobacteria | Coriobacteriia | 0                   | 0                    | 0                   | 0                    |
| <b>seq1293</b> | Actinobacteria | Coriobacteriia | 0                   | 0                    | 0                   | 0                    |
| <b>seq1593</b> | Actinobacteria | Actinobacteria | 0                   | 0                    | 0                   | 0                    |
| <b>seq1867</b> | Actinobacteria | Actinobacteria | 0                   | 0                    | 0                   | 0                    |
| <b>seq1225</b> | Actinobacteria | Actinobacteria | 0                   | 0                    | 0                   | 0                    |
| <b>seq130</b>  | Actinobacteria | Coriobacteriia | 217                 | 195                  | 0                   | 255                  |
| <b>seq754</b>  | Actinobacteria | Coriobacteriia | 18                  | 13                   | 0                   | 0                    |
| <b>seq148</b>  | Actinobacteria | Coriobacteriia | 0                   | 0                    | 0                   | 9                    |
| <b>seq356</b>  | Actinobacteria | Coriobacteriia | 0                   | 0                    | 0                   | 0                    |
| <b>seq519</b>  | Actinobacteria | Coriobacteriia | 0                   | 0                    | 0                   | 0                    |
| <b>seq315</b>  | Actinobacteria | Coriobacteriia | 0                   | 0                    | 0                   | 0                    |
| <b>seq360</b>  | Actinobacteria | Coriobacteriia | 30                  | 30                   | 0                   | 0                    |
| <b>seq910</b>  | Actinobacteria | Coriobacteriia | 0                   | 0                    | 0                   | 16                   |
| <b>seq1068</b> | Actinobacteria | Coriobacteriia | 0                   | 0                    | 0                   | 0                    |
| <b>seq1431</b> | Actinobacteria | Coriobacteriia | 0                   | 0                    | 0                   | 0                    |
| <b>seq1557</b> | Actinobacteria | Coriobacteriia | 0                   | 0                    | 0                   | 0                    |
| <b>seq1324</b> | Actinobacteria | Coriobacteriia | 0                   | 0                    | 0                   | 0                    |
| <b>seq184</b>  | Actinobacteria | Coriobacteriia | 0                   | 0                    | 0                   | 0                    |
| <b>seq421</b>  | Actinobacteria | Coriobacteriia | 0                   | 0                    | 0                   | 0                    |
| <b>seq222</b>  | Actinobacteria | Coriobacteriia | 0                   | 0                    | 0                   | 619                  |
| <b>seq396</b>  | Actinobacteria | Coriobacteriia | 0                   | 0                    | 0                   | 0                    |
| <b>seq451</b>  | Actinobacteria | Coriobacteriia | 0                   | 0                    | 0                   | 0                    |
| <b>seq642</b>  | Actinobacteria | Coriobacteriia | 0                   | 0                    | 0                   | 0                    |
| <b>seq767</b>  | Actinobacteria | Coriobacteriia | 0                   | 0                    | 0                   | 0                    |
| <b>seq1594</b> | Actinobacteria | Coriobacteriia | 0                   | 0                    | 0                   | 0                    |
| <b>seq1649</b> | Actinobacteria | Coriobacteriia | 0                   | 0                    | 0                   | 0                    |
| <b>seq1520</b> | Actinobacteria | Actinobacteria | 0                   | 0                    | 0                   | 0                    |
| <b>seq1728</b> | Actinobacteria | Actinobacteria | 0                   | 0                    | 0                   | 0                    |
| <b>seq1836</b> | Actinobacteria | Actinobacteria | 0                   | 0                    | 0                   | 0                    |

Sequence Count Table

|                | <b>Phylum</b>  | <b>Class</b>   | <b>Subject26WK0</b> | <b>Subject26WK12</b> | <b>Subject14WK0</b> | <b>Subject14WK12</b> |
|----------------|----------------|----------------|---------------------|----------------------|---------------------|----------------------|
| <b>seq885</b>  | Actinobacteria | Coriobacteriia | 0                   | 0                    | 0                   | 0                    |
| <b>seq1169</b> | Actinobacteria | Coriobacteriia | 18                  | 0                    | 0                   | 0                    |
| <b>seq248</b>  | Actinobacteria | Coriobacteriia | 0                   | 0                    | 18                  | 15                   |
| <b>seq1190</b> | Actinobacteria | Coriobacteriia | 0                   | 0                    | 0                   | 0                    |
| <b>seq1293</b> | Actinobacteria | Coriobacteriia | 0                   | 0                    | 0                   | 0                    |
| <b>seq1593</b> | Actinobacteria | Actinobacteria | 0                   | 0                    | 0                   | 0                    |
| <b>seq1867</b> | Actinobacteria | Actinobacteria | 0                   | 0                    | 0                   | 0                    |
| <b>seq1225</b> | Actinobacteria | Actinobacteria | 0                   | 0                    | 0                   | 0                    |
| <b>seq130</b>  | Actinobacteria | Coriobacteriia | 0                   | 0                    | 0                   | 67                   |
| <b>seq754</b>  | Actinobacteria | Coriobacteriia | 38                  | 0                    | 0                   | 0                    |
| <b>seq148</b>  | Actinobacteria | Coriobacteriia | 572                 | 574                  | 0                   | 0                    |
| <b>seq356</b>  | Actinobacteria | Coriobacteriia | 118                 | 0                    | 0                   | 0                    |
| <b>seq519</b>  | Actinobacteria | Coriobacteriia | 156                 | 167                  | 0                   | 0                    |
| <b>seq315</b>  | Actinobacteria | Coriobacteriia | 0                   | 0                    | 0                   | 0                    |
| <b>seq360</b>  | Actinobacteria | Coriobacteriia | 248                 | 95                   | 0                   | 0                    |
| <b>seq910</b>  | Actinobacteria | Coriobacteriia | 13                  | 0                    | 38                  | 0                    |
| <b>seq1068</b> | Actinobacteria | Coriobacteriia | 0                   | 0                    | 0                   | 17                   |
| <b>seq1431</b> | Actinobacteria | Coriobacteriia | 0                   | 0                    | 0                   | 0                    |
| <b>seq1557</b> | Actinobacteria | Coriobacteriia | 0                   | 0                    | 0                   | 0                    |
| <b>seq1324</b> | Actinobacteria | Coriobacteriia | 0                   | 0                    | 0                   | 0                    |
| <b>seq184</b>  | Actinobacteria | Coriobacteriia | 0                   | 0                    | 0                   | 0                    |
| <b>seq421</b>  | Actinobacteria | Coriobacteriia | 0                   | 0                    | 241                 | 330                  |
| <b>seq222</b>  | Actinobacteria | Coriobacteriia | 0                   | 0                    | 22                  | 51                   |
| <b>seq396</b>  | Actinobacteria | Coriobacteriia | 0                   | 0                    | 0                   | 0                    |
| <b>seq451</b>  | Actinobacteria | Coriobacteriia | 0                   | 0                    | 0                   | 0                    |
| <b>seq642</b>  | Actinobacteria | Coriobacteriia | 0                   | 0                    | 75                  | 122                  |
| <b>seq767</b>  | Actinobacteria | Coriobacteriia | 0                   | 0                    | 0                   | 0                    |
| <b>seq1594</b> | Actinobacteria | Coriobacteriia | 0                   | 0                    | 0                   | 0                    |
| <b>seq1649</b> | Actinobacteria | Coriobacteriia | 0                   | 0                    | 0                   | 0                    |
| <b>seq1520</b> | Actinobacteria | Actinobacteria | 0                   | 0                    | 0                   | 0                    |
| <b>seq1728</b> | Actinobacteria | Actinobacteria | 0                   | 0                    | 0                   | 0                    |
| <b>seq1836</b> | Actinobacteria | Actinobacteria | 0                   | 0                    | 0                   | 0                    |

Sequence Count Table

|                | <b>Phylum</b>  | <b>Class</b>   | <b>Subject27WK0</b> | <b>Subject27WK12</b> | <b>Subject15WK0</b> | <b>Subject15WK12</b> |
|----------------|----------------|----------------|---------------------|----------------------|---------------------|----------------------|
| <b>seq885</b>  | Actinobacteria | Coriobacteriia | 0                   | 0                    | 0                   | 0                    |
| <b>seq1169</b> | Actinobacteria | Coriobacteriia | 0                   | 0                    | 0                   | 0                    |
| <b>seq248</b>  | Actinobacteria | Coriobacteriia | 0                   | 0                    | 0                   | 0                    |
| <b>seq1190</b> | Actinobacteria | Coriobacteriia | 0                   | 0                    | 0                   | 0                    |
| <b>seq1293</b> | Actinobacteria | Coriobacteriia | 0                   | 0                    | 44                  | 14                   |
| <b>seq1593</b> | Actinobacteria | Actinobacteria | 0                   | 0                    | 0                   | 0                    |
| <b>seq1867</b> | Actinobacteria | Actinobacteria | 0                   | 0                    | 0                   | 0                    |
| <b>seq1225</b> | Actinobacteria | Actinobacteria | 0                   | 0                    | 0                   | 0                    |
| <b>seq130</b>  | Actinobacteria | Coriobacteriia | 190                 | 174                  | 37                  | 0                    |
| <b>seq754</b>  | Actinobacteria | Coriobacteriia | 0                   | 0                    | 0                   | 0                    |
| <b>seq148</b>  | Actinobacteria | Coriobacteriia | 85                  | 39                   | 22                  | 11                   |
| <b>seq356</b>  | Actinobacteria | Coriobacteriia | 0                   | 0                    | 0                   | 0                    |
| <b>seq519</b>  | Actinobacteria | Coriobacteriia | 0                   | 0                    | 0                   | 0                    |
| <b>seq315</b>  | Actinobacteria | Coriobacteriia | 0                   | 0                    | 0                   | 0                    |
| <b>seq360</b>  | Actinobacteria | Coriobacteriia | 18                  | 23                   | 27                  | 0                    |
| <b>seq910</b>  | Actinobacteria | Coriobacteriia | 0                   | 0                    | 0                   | 0                    |
| <b>seq1068</b> | Actinobacteria | Coriobacteriia | 0                   | 0                    | 0                   | 0                    |
| <b>seq1431</b> | Actinobacteria | Coriobacteriia | 0                   | 0                    | 0                   | 0                    |
| <b>seq1557</b> | Actinobacteria | Coriobacteriia | 0                   | 0                    | 0                   | 0                    |
| <b>seq1324</b> | Actinobacteria | Coriobacteriia | 0                   | 0                    | 0                   | 0                    |
| <b>seq184</b>  | Actinobacteria | Coriobacteriia | 0                   | 0                    | 307                 | 189                  |
| <b>seq421</b>  | Actinobacteria | Coriobacteriia | 0                   | 0                    | 0                   | 0                    |
| <b>seq222</b>  | Actinobacteria | Coriobacteriia | 0                   | 0                    | 0                   | 0                    |
| <b>seq396</b>  | Actinobacteria | Coriobacteriia | 0                   | 0                    | 0                   | 0                    |
| <b>seq451</b>  | Actinobacteria | Coriobacteriia | 0                   | 0                    | 0                   | 0                    |
| <b>seq642</b>  | Actinobacteria | Coriobacteriia | 0                   | 0                    | 0                   | 0                    |
| <b>seq767</b>  | Actinobacteria | Coriobacteriia | 0                   | 0                    | 0                   | 0                    |
| <b>seq1594</b> | Actinobacteria | Coriobacteriia | 0                   | 0                    | 0                   | 0                    |
| <b>seq1649</b> | Actinobacteria | Coriobacteriia | 0                   | 0                    | 0                   | 0                    |
| <b>seq1520</b> | Actinobacteria | Actinobacteria | 0                   | 27                   | 0                   | 0                    |
| <b>seq1728</b> | Actinobacteria | Actinobacteria | 0                   | 0                    | 0                   | 0                    |
| <b>seq1836</b> | Actinobacteria | Actinobacteria | 0                   | 0                    | 0                   | 0                    |

Sequence Count Table

|                | <b>Phylum</b>  | <b>Class</b>   | <b>Δ</b> |  |  |  |
|----------------|----------------|----------------|----------|--|--|--|
| <b>seq885</b>  | Actinobacteria | Coriobacteriia |          |  |  |  |
| <b>seq1169</b> | Actinobacteria | Coriobacteriia |          |  |  |  |
| <b>seq248</b>  | Actinobacteria | Coriobacteriia |          |  |  |  |
| <b>seq1190</b> | Actinobacteria | Coriobacteriia |          |  |  |  |
| <b>seq1293</b> | Actinobacteria | Coriobacteriia |          |  |  |  |
| <b>seq1593</b> | Actinobacteria | Actinobacteria |          |  |  |  |
| <b>seq1867</b> | Actinobacteria | Actinobacteria |          |  |  |  |
| <b>seq1225</b> | Actinobacteria | Actinobacteria |          |  |  |  |
| <b>seq130</b>  | Actinobacteria | Coriobacteriia |          |  |  |  |
| <b>seq754</b>  | Actinobacteria | Coriobacteriia |          |  |  |  |
| <b>seq148</b>  | Actinobacteria | Coriobacteriia |          |  |  |  |
| <b>seq356</b>  | Actinobacteria | Coriobacteriia |          |  |  |  |
| <b>seq519</b>  | Actinobacteria | Coriobacteriia |          |  |  |  |
| <b>seq315</b>  | Actinobacteria | Coriobacteriia |          |  |  |  |
| <b>seq360</b>  | Actinobacteria | Coriobacteriia |          |  |  |  |
| <b>seq910</b>  | Actinobacteria | Coriobacteriia |          |  |  |  |
| <b>seq1068</b> | Actinobacteria | Coriobacteriia |          |  |  |  |
| <b>seq1431</b> | Actinobacteria | Coriobacteriia |          |  |  |  |
| <b>seq1557</b> | Actinobacteria | Coriobacteriia |          |  |  |  |
| <b>seq1324</b> | Actinobacteria | Coriobacteriia |          |  |  |  |
| <b>seq184</b>  | Actinobacteria | Coriobacteriia |          |  |  |  |
| <b>seq421</b>  | Actinobacteria | Coriobacteriia |          |  |  |  |
| <b>seq222</b>  | Actinobacteria | Coriobacteriia |          |  |  |  |
| <b>seq396</b>  | Actinobacteria | Coriobacteriia |          |  |  |  |
| <b>seq451</b>  | Actinobacteria | Coriobacteriia |          |  |  |  |
| <b>seq642</b>  | Actinobacteria | Coriobacteriia |          |  |  |  |
| <b>seq767</b>  | Actinobacteria | Coriobacteriia |          |  |  |  |
| <b>seq1594</b> | Actinobacteria | Coriobacteriia |          |  |  |  |
| <b>seq1649</b> | Actinobacteria | Coriobacteriia |          |  |  |  |
| <b>seq1520</b> | Actinobacteria | Actinobacteria |          |  |  |  |
| <b>seq1728</b> | Actinobacteria | Actinobacteria |          |  |  |  |
| <b>seq1836</b> | Actinobacteria | Actinobacteria |          |  |  |  |

Sequence Count Table

|                | <b>Phylum</b>         | <b>Class</b>   | <b>Order</b>        | <b>Family</b>        |
|----------------|-----------------------|----------------|---------------------|----------------------|
| <b>seq1885</b> | Actinobacteria        | Actinobacteria | Micrococcales       | Micrococcaceae       |
| <b>seq1764</b> | Actinobacteria        | Actinobacteria | Propionibacteriales | Propionibacteriaceae |
| <b>seq906</b>  | Actinobacteria        | Coriobacteriia | Coriobacteriales    |                      |
| <b>seq912</b>  | Actinobacteria        | Coriobacteriia | Coriobacteriales    |                      |
| <b>seq931</b>  | Actinobacteria        | Coriobacteriia | Coriobacteriales    |                      |
| <b>seq1256</b> | Actinobacteria        | Coriobacteriia | Coriobacteriales    |                      |
|                | <b>Actinobacteria</b> | <b>TOTAL</b>   |                     |                      |
|                |                       |                |                     |                      |
| <b>seq1</b>    | Bacteroidetes         | Bacteroidia    | Bacteroidales       | Bacteroidaceae       |
| <b>seq9</b>    | Bacteroidetes         | Bacteroidia    | Bacteroidales       | Bacteroidaceae       |
| <b>seq10</b>   | Bacteroidetes         | Bacteroidia    | Bacteroidales       | Bacteroidaceae       |
| <b>seq11</b>   | Bacteroidetes         | Bacteroidia    | Bacteroidales       | Bacteroidaceae       |
| <b>seq14</b>   | Bacteroidetes         | Bacteroidia    | Bacteroidales       | Bacteroidaceae       |
| <b>seq19</b>   | Bacteroidetes         | Bacteroidia    | Bacteroidales       | Bacteroidaceae       |
| <b>seq20</b>   | Bacteroidetes         | Bacteroidia    | Bacteroidales       | Bacteroidaceae       |
| <b>seq33</b>   | Bacteroidetes         | Bacteroidia    | Bacteroidales       | Bacteroidaceae       |
| <b>seq34</b>   | Bacteroidetes         | Bacteroidia    | Bacteroidales       | Bacteroidaceae       |
| <b>seq38</b>   | Bacteroidetes         | Bacteroidia    | Bacteroidales       | Bacteroidaceae       |
| <b>seq47</b>   | Bacteroidetes         | Bacteroidia    | Bacteroidales       | Bacteroidaceae       |
| <b>seq51</b>   | Bacteroidetes         | Bacteroidia    | Bacteroidales       | Bacteroidaceae       |
| <b>seq68</b>   | Bacteroidetes         | Bacteroidia    | Bacteroidales       | Bacteroidaceae       |
| <b>seq73</b>   | Bacteroidetes         | Bacteroidia    | Bacteroidales       | Bacteroidaceae       |
| <b>seq76</b>   | Bacteroidetes         | Bacteroidia    | Bacteroidales       | Bacteroidaceae       |
| <b>seq87</b>   | Bacteroidetes         | Bacteroidia    | Bacteroidales       | Bacteroidaceae       |
| <b>seq90</b>   | Bacteroidetes         | Bacteroidia    | Bacteroidales       | Bacteroidaceae       |
| <b>seq111</b>  | Bacteroidetes         | Bacteroidia    | Bacteroidales       | Bacteroidaceae       |
| <b>seq132</b>  | Bacteroidetes         | Bacteroidia    | Bacteroidales       | Bacteroidaceae       |
| <b>seq152</b>  | Bacteroidetes         | Bacteroidia    | Bacteroidales       | Bacteroidaceae       |
| <b>seq178</b>  | Bacteroidetes         | Bacteroidia    | Bacteroidales       | Bacteroidaceae       |
| <b>seq180</b>  | Bacteroidetes         | Bacteroidia    | Bacteroidales       | Bacteroidaceae       |
| <b>seq185</b>  | Bacteroidetes         | Bacteroidia    | Bacteroidales       | Bacteroidaceae       |
| <b>seq192</b>  | Bacteroidetes         | Bacteroidia    | Bacteroidales       | Bacteroidaceae       |



Sequence Count Table

|                | <b>Phylum</b>         | <b>Class</b>   | <b>Genus</b>      | <b>Species</b> |
|----------------|-----------------------|----------------|-------------------|----------------|
| <b>seq1885</b> | Actinobacteria        | Actinobacteria | Rothia            | dentocariosa   |
| <b>seq1764</b> | Actinobacteria        | Actinobacteria | Propionibacterium | freudenreichii |
| <b>seq906</b>  | Actinobacteria        | Coriobacteriia |                   |                |
| <b>seq912</b>  | Actinobacteria        | Coriobacteriia |                   |                |
| <b>seq931</b>  | Actinobacteria        | Coriobacteriia |                   |                |
| <b>seq1256</b> | Actinobacteria        | Coriobacteriia |                   |                |
|                | <b>Actinobacteria</b> | <b>TOTAL</b>   |                   |                |
|                |                       |                |                   |                |
| <b>seq1</b>    | Bacteroidetes         | Bacteroidia    | Bacteroides       | vulgatus       |
| <b>seq9</b>    | Bacteroidetes         | Bacteroidia    | Bacteroides       |                |
| <b>seq10</b>   | Bacteroidetes         | Bacteroidia    | Bacteroides       | uniformis      |
| <b>seq11</b>   | Bacteroidetes         | Bacteroidia    | Bacteroides       |                |
| <b>seq14</b>   | Bacteroidetes         | Bacteroidia    | Bacteroides       | plebeius       |
| <b>seq19</b>   | Bacteroidetes         | Bacteroidia    | Bacteroides       | massiliensis   |
| <b>seq20</b>   | Bacteroidetes         | Bacteroidia    | Bacteroides       | uniformis      |
| <b>seq33</b>   | Bacteroidetes         | Bacteroidia    | Bacteroides       |                |
| <b>seq34</b>   | Bacteroidetes         | Bacteroidia    | Bacteroides       |                |
| <b>seq38</b>   | Bacteroidetes         | Bacteroidia    | Bacteroides       | caccae         |
| <b>seq47</b>   | Bacteroidetes         | Bacteroidia    | Bacteroides       |                |
| <b>seq51</b>   | Bacteroidetes         | Bacteroidia    | Bacteroides       |                |
| <b>seq68</b>   | Bacteroidetes         | Bacteroidia    | Bacteroides       |                |
| <b>seq73</b>   | Bacteroidetes         | Bacteroidia    | Bacteroides       |                |
| <b>seq76</b>   | Bacteroidetes         | Bacteroidia    | Bacteroides       |                |
| <b>seq87</b>   | Bacteroidetes         | Bacteroidia    | Bacteroides       | eggerthii      |
| <b>seq90</b>   | Bacteroidetes         | Bacteroidia    | Bacteroides       | coprocola      |
| <b>seq111</b>  | Bacteroidetes         | Bacteroidia    | Bacteroides       | eggerthii      |
| <b>seq132</b>  | Bacteroidetes         | Bacteroidia    | Bacteroides       | finegoldii     |
| <b>seq152</b>  | Bacteroidetes         | Bacteroidia    | Bacteroides       | stercoris      |
| <b>seq178</b>  | Bacteroidetes         | Bacteroidia    | Bacteroides       | vulgatus       |
| <b>seq180</b>  | Bacteroidetes         | Bacteroidia    | Bacteroides       | vulgatus       |
| <b>seq185</b>  | Bacteroidetes         | Bacteroidia    | Bacteroides       | intestinalis   |
| <b>seq192</b>  | Bacteroidetes         | Bacteroidia    | Bacteroides       | uniformis      |

Sequence Count Table

|         | Phylum                | Class          | Subject34WK0 | Subject34WK12 | Subject16WK0 | Subject16WK12 |
|---------|-----------------------|----------------|--------------|---------------|--------------|---------------|
| seq1885 | Actinobacteria        | Actinobacteria | 0            | 0             | 0            | 0             |
| seq1764 | Actinobacteria        | Actinobacteria | 0            | 0             | 0            | 0             |
| seq906  | Actinobacteria        | Coriobacteriia | 0            | 191           | 0            | 0             |
| seq912  | Actinobacteria        | Coriobacteriia | 0            | 0             | 0            | 0             |
| seq931  | Actinobacteria        | Coriobacteriia | 0            | 0             | 0            | 24            |
| seq1256 | Actinobacteria        | Coriobacteriia | 0            | 0             | 0            | 0             |
|         | <b>Actinobacteria</b> | <b>TOTAL</b>   | <b>429</b>   | <b>18843</b>  | <b>4903</b>  | <b>12203</b>  |
|         |                       |                |              |               |              |               |
| seq1    | Bacteroidetes         | Bacteroidia    | 1191         | 9420          | 1282         | 965           |
| seq9    | Bacteroidetes         | Bacteroidia    | 0            | 0             | 864          | 458           |
| seq10   | Bacteroidetes         | Bacteroidia    | 106          | 1689          | 352          | 615           |
| seq11   | Bacteroidetes         | Bacteroidia    | 0            | 0             | 0            | 120           |
| seq14   | Bacteroidetes         | Bacteroidia    | 0            | 0             | 0            | 0             |
| seq19   | Bacteroidetes         | Bacteroidia    | 96           | 3443          | 1120         | 701           |
| seq20   | Bacteroidetes         | Bacteroidia    | 0            | 107           | 0            | 0             |
| seq33   | Bacteroidetes         | Bacteroidia    | 167          | 1093          | 191          | 173           |
| seq34   | Bacteroidetes         | Bacteroidia    | 63           | 633           | 235          | 164           |
| seq38   | Bacteroidetes         | Bacteroidia    | 30           | 4597          | 176          | 286           |
| seq47   | Bacteroidetes         | Bacteroidia    | 19           | 221           | 0            | 0             |
| seq51   | Bacteroidetes         | Bacteroidia    | 0            | 285           | 0            | 68            |
| seq68   | Bacteroidetes         | Bacteroidia    | 0            | 0             | 0            | 0             |
| seq73   | Bacteroidetes         | Bacteroidia    | 0            | 0             | 0            | 0             |
| seq76   | Bacteroidetes         | Bacteroidia    | 0            | 0             | 0            | 0             |
| seq87   | Bacteroidetes         | Bacteroidia    | 51           | 1942          | 0            | 0             |
| seq90   | Bacteroidetes         | Bacteroidia    | 0            | 0             | 0            | 0             |
| seq111  | Bacteroidetes         | Bacteroidia    | 0            | 0             | 0            | 0             |
| seq132  | Bacteroidetes         | Bacteroidia    | 0            | 0             | 0            | 0             |
| seq152  | Bacteroidetes         | Bacteroidia    | 0            | 0             | 0            | 0             |
| seq178  | Bacteroidetes         | Bacteroidia    | 0            | 0             | 0            | 0             |
| seq180  | Bacteroidetes         | Bacteroidia    | 275          | 1491          | 0            | 0             |
| seq185  | Bacteroidetes         | Bacteroidia    | 0            | 0             | 0            | 0             |
| seq192  | Bacteroidetes         | Bacteroidia    | 0            | 0             | 0            | 0             |

Sequence Count Table

|         | Phylum                | Class          | Subject17WK0 | Subject17WK12 | Subject1WK0 | Subject1WK12 |
|---------|-----------------------|----------------|--------------|---------------|-------------|--------------|
| seq1885 | Actinobacteria        | Actinobacteria | 0            | 0             | 0           | 0            |
| seq1764 | Actinobacteria        | Actinobacteria | 0            | 9             | 0           | 0            |
| seq906  | Actinobacteria        | Coriobacteriia | 0            | 0             | 0           | 0            |
| seq912  | Actinobacteria        | Coriobacteriia | 0            | 0             | 0           | 0            |
| seq931  | Actinobacteria        | Coriobacteriia | 0            | 0             | 0           | 0            |
| seq1256 | Actinobacteria        | Coriobacteriia | 0            | 0             | 27          | 39           |
|         | <b>Actinobacteria</b> | <b>TOTAL</b>   | <b>8971</b>  | <b>4734</b>   | <b>4164</b> | <b>4553</b>  |
|         |                       |                |              |               |             |              |
| seq1    | Bacteroidetes         | Bacteroidia    | 6300         | 7188          | 0           | 0            |
| seq9    | Bacteroidetes         | Bacteroidia    | 0            | 0             | 0           | 0            |
| seq10   | Bacteroidetes         | Bacteroidia    | 0            | 430           | 6268        | 7327         |
| seq11   | Bacteroidetes         | Bacteroidia    | 0            | 0             | 0           | 0            |
| seq14   | Bacteroidetes         | Bacteroidia    | 0            | 0             | 0           | 0            |
| seq19   | Bacteroidetes         | Bacteroidia    | 0            | 0             | 0           | 0            |
| seq20   | Bacteroidetes         | Bacteroidia    | 2917         | 11099         | 0           | 0            |
| seq33   | Bacteroidetes         | Bacteroidia    | 1251         | 1886          | 0           | 0            |
| seq34   | Bacteroidetes         | Bacteroidia    | 21           | 67            | 4396        | 4528         |
| seq38   | Bacteroidetes         | Bacteroidia    | 0            | 0             | 2473        | 2707         |
| seq47   | Bacteroidetes         | Bacteroidia    | 0            | 162           | 0           | 0            |
| seq51   | Bacteroidetes         | Bacteroidia    | 221          | 161           | 0           | 0            |
| seq68   | Bacteroidetes         | Bacteroidia    | 735          | 804           | 0           | 0            |
| seq73   | Bacteroidetes         | Bacteroidia    | 0            | 0             | 0           | 0            |
| seq76   | Bacteroidetes         | Bacteroidia    | 0            | 0             | 0           | 0            |
| seq87   | Bacteroidetes         | Bacteroidia    | 7305         | 4327          | 0           | 0            |
| seq90   | Bacteroidetes         | Bacteroidia    | 0            | 0             | 0           | 0            |
| seq111  | Bacteroidetes         | Bacteroidia    | 2282         | 1448          | 0           | 0            |
| seq132  | Bacteroidetes         | Bacteroidia    | 0            | 0             | 0           | 0            |
| seq152  | Bacteroidetes         | Bacteroidia    | 0            | 0             | 0           | 0            |
| seq178  | Bacteroidetes         | Bacteroidia    | 0            | 0             | 0           | 0            |
| seq180  | Bacteroidetes         | Bacteroidia    | 0            | 0             | 0           | 0            |
| seq185  | Bacteroidetes         | Bacteroidia    | 0            | 0             | 0           | 0            |
| seq192  | Bacteroidetes         | Bacteroidia    | 0            | 0             | 0           | 0            |

Sequence Count Table

|         | Phylum                | Class          | Subject2WK0 | Subject2WK12 | Subject3WK0 | Subject3WK12 |
|---------|-----------------------|----------------|-------------|--------------|-------------|--------------|
| seq1885 | Actinobacteria        | Actinobacteria | 0           | 0            | 0           | 0            |
| seq1764 | Actinobacteria        | Actinobacteria | 0           | 0            | 0           | 0            |
| seq906  | Actinobacteria        | Coriobacteriia | 0           | 0            | 0           | 0            |
| seq912  | Actinobacteria        | Coriobacteriia | 0           | 0            | 0           | 0            |
| seq931  | Actinobacteria        | Coriobacteriia | 0           | 0            | 0           | 0            |
| seq1256 | Actinobacteria        | Coriobacteriia | 0           | 0            | 0           | 0            |
|         | <b>Actinobacteria</b> | <b>TOTAL</b>   | <b>8167</b> | <b>9079</b>  | <b>2584</b> | <b>301</b>   |
|         |                       |                |             |              |             |              |
| seq1    | Bacteroidetes         | Bacteroidia    | 12623       | 10921        | 6808        | 8299         |
| seq9    | Bacteroidetes         | Bacteroidia    | 0           | 0            | 2776        | 12145        |
| seq10   | Bacteroidetes         | Bacteroidia    | 0           | 0            | 1555        | 2404         |
| seq11   | Bacteroidetes         | Bacteroidia    | 0           | 0            | 2566        | 3246         |
| seq14   | Bacteroidetes         | Bacteroidia    | 0           | 0            | 0           | 0            |
| seq19   | Bacteroidetes         | Bacteroidia    | 0           | 0            | 0           | 0            |
| seq20   | Bacteroidetes         | Bacteroidia    | 0           | 0            | 445         | 841          |
| seq33   | Bacteroidetes         | Bacteroidia    | 0           | 0            | 1641        | 1154         |
| seq34   | Bacteroidetes         | Bacteroidia    | 0           | 0            | 7037        | 4971         |
| seq38   | Bacteroidetes         | Bacteroidia    | 0           | 0            | 0           | 0            |
| seq47   | Bacteroidetes         | Bacteroidia    | 4209        | 3443         | 0           | 0            |
| seq51   | Bacteroidetes         | Bacteroidia    | 889         | 717          | 0           | 0            |
| seq68   | Bacteroidetes         | Bacteroidia    | 0           | 0            | 1421        | 2998         |
| seq73   | Bacteroidetes         | Bacteroidia    | 7509        | 5114         | 0           | 0            |
| seq76   | Bacteroidetes         | Bacteroidia    | 2669        | 2820         | 0           | 0            |
| seq87   | Bacteroidetes         | Bacteroidia    | 0           | 0            | 0           | 0            |
| seq90   | Bacteroidetes         | Bacteroidia    | 0           | 0            | 0           | 0            |
| seq111  | Bacteroidetes         | Bacteroidia    | 0           | 0            | 0           | 0            |
| seq132  | Bacteroidetes         | Bacteroidia    | 0           | 0            | 1002        | 1788         |
| seq152  | Bacteroidetes         | Bacteroidia    | 0           | 0            | 0           | 0            |
| seq178  | Bacteroidetes         | Bacteroidia    | 0           | 0            | 0           | 0            |
| seq180  | Bacteroidetes         | Bacteroidia    | 0           | 0            | 0           | 0            |
| seq185  | Bacteroidetes         | Bacteroidia    | 0           | 0            | 0           | 0            |
| seq192  | Bacteroidetes         | Bacteroidia    | 0           | 0            | 0           | 0            |

Sequence Count Table

|                | <b>Phylum</b>         | <b>Class</b>   | <b>Subject4WK0</b> | <b>Subject4WK12</b> | <b>Subject5WK0</b> | <b>Subject5WK12</b> |
|----------------|-----------------------|----------------|--------------------|---------------------|--------------------|---------------------|
| <b>seq1885</b> | Actinobacteria        | Actinobacteria | 0                  | 0                   | 3                  | 0                   |
| <b>seq1764</b> | Actinobacteria        | Actinobacteria | 0                  | 0                   | 0                  | 0                   |
| <b>seq906</b>  | Actinobacteria        | Coriobacteriia | 0                  | 0                   | 0                  | 0                   |
| <b>seq912</b>  | Actinobacteria        | Coriobacteriia | 0                  | 0                   | 0                  | 0                   |
| <b>seq931</b>  | Actinobacteria        | Coriobacteriia | 0                  | 0                   | 0                  | 0                   |
| <b>seq1256</b> | Actinobacteria        | Coriobacteriia | 0                  | 0                   | 0                  | 0                   |
|                | <b>Actinobacteria</b> | <b>TOTAL</b>   | <b>7842</b>        | <b>9006</b>         | <b>7209</b>        | <b>3009</b>         |
|                |                       |                |                    |                     |                    |                     |
| <b>seq1</b>    | Bacteroidetes         | Bacteroidia    | 4899               | 6627                | 18425              | 19730               |
| <b>seq9</b>    | Bacteroidetes         | Bacteroidia    | 0                  | 0                   | 5375               | 3380                |
| <b>seq10</b>   | Bacteroidetes         | Bacteroidia    | 3324               | 4823                | 0                  | 0                   |
| <b>seq11</b>   | Bacteroidetes         | Bacteroidia    | 1390               | 251                 | 175                | 706                 |
| <b>seq14</b>   | Bacteroidetes         | Bacteroidia    | 10447              | 13980               | 0                  | 0                   |
| <b>seq19</b>   | Bacteroidetes         | Bacteroidia    | 4268               | 12541               | 0                  | 0                   |
| <b>seq20</b>   | Bacteroidetes         | Bacteroidia    | 6612               | 10524               | 2918               | 2511                |
| <b>seq33</b>   | Bacteroidetes         | Bacteroidia    | 327                | 714                 | 642                | 578                 |
| <b>seq34</b>   | Bacteroidetes         | Bacteroidia    | 442                | 317                 | 719                | 158                 |
| <b>seq38</b>   | Bacteroidetes         | Bacteroidia    | 1228               | 754                 | 1508               | 6127                |
| <b>seq47</b>   | Bacteroidetes         | Bacteroidia    | 699                | 499                 | 122                | 146                 |
| <b>seq51</b>   | Bacteroidetes         | Bacteroidia    | 0                  | 0                   | 247                | 83                  |
| <b>seq68</b>   | Bacteroidetes         | Bacteroidia    | 0                  | 0                   | 0                  | 0                   |
| <b>seq73</b>   | Bacteroidetes         | Bacteroidia    | 0                  | 0                   | 865                | 371                 |
| <b>seq76</b>   | Bacteroidetes         | Bacteroidia    | 0                  | 0                   | 0                  | 0                   |
| <b>seq87</b>   | Bacteroidetes         | Bacteroidia    | 0                  | 0                   | 1199               | 1288                |
| <b>seq90</b>   | Bacteroidetes         | Bacteroidia    | 0                  | 0                   | 0                  | 0                   |
| <b>seq111</b>  | Bacteroidetes         | Bacteroidia    | 0                  | 0                   | 3694               | 3842                |
| <b>seq132</b>  | Bacteroidetes         | Bacteroidia    | 0                  | 0                   | 0                  | 0                   |
| <b>seq152</b>  | Bacteroidetes         | Bacteroidia    | 0                  | 0                   | 1350               | 820                 |
| <b>seq178</b>  | Bacteroidetes         | Bacteroidia    | 0                  | 0                   | 706                | 328                 |
| <b>seq180</b>  | Bacteroidetes         | Bacteroidia    | 0                  | 0                   | 0                  | 0                   |
| <b>seq185</b>  | Bacteroidetes         | Bacteroidia    | 0                  | 0                   | 0                  | 0                   |
| <b>seq192</b>  | Bacteroidetes         | Bacteroidia    | 0                  | 0                   | 0                  | 0                   |

Sequence Count Table

|         | Phylum                | Class          | Subject6WK0 | Subject6WK12 | Subject18WK0 | Subject18WK12 |
|---------|-----------------------|----------------|-------------|--------------|--------------|---------------|
| seq1885 | Actinobacteria        | Actinobacteria | 0           | 0            | 0            | 0             |
| seq1764 | Actinobacteria        | Actinobacteria | 0           | 0            | 0            | 0             |
| seq906  | Actinobacteria        | Coriobacteriia | 0           | 0            | 0            | 0             |
| seq912  | Actinobacteria        | Coriobacteriia | 45          | 67           | 0            | 0             |
| seq931  | Actinobacteria        | Coriobacteriia | 0           | 0            | 0            | 0             |
| seq1256 | Actinobacteria        | Coriobacteriia | 0           | 0            | 0            | 0             |
|         | <b>Actinobacteria</b> | <b>TOTAL</b>   | <b>8180</b> | <b>12897</b> | <b>17043</b> | <b>10160</b>  |
|         |                       |                |             |              |              |               |
| seq1    | Bacteroidetes         | Bacteroidia    | 4443        | 6498         | 11988        | 6815          |
| seq9    | Bacteroidetes         | Bacteroidia    | 469         | 1087         | 3806         | 1369          |
| seq10   | Bacteroidetes         | Bacteroidia    | 0           | 0            | 0            | 0             |
| seq11   | Bacteroidetes         | Bacteroidia    | 0           | 0            | 0            | 0             |
| seq14   | Bacteroidetes         | Bacteroidia    | 0           | 0            | 29185        | 31336         |
| seq19   | Bacteroidetes         | Bacteroidia    | 993         | 1503         | 6187         | 2461          |
| seq20   | Bacteroidetes         | Bacteroidia    | 137         | 138          | 0            | 0             |
| seq33   | Bacteroidetes         | Bacteroidia    | 183         | 439          | 278          | 95            |
| seq34   | Bacteroidetes         | Bacteroidia    | 49          | 51           | 297          | 123           |
| seq38   | Bacteroidetes         | Bacteroidia    | 195         | 384          | 1512         | 1492          |
| seq47   | Bacteroidetes         | Bacteroidia    | 114         | 59           | 931          | 583           |
| seq51   | Bacteroidetes         | Bacteroidia    | 0           | 0            | 502          | 248           |
| seq68   | Bacteroidetes         | Bacteroidia    | 0           | 0            | 0            | 0             |
| seq73   | Bacteroidetes         | Bacteroidia    | 0           | 0            | 0            | 0             |
| seq76   | Bacteroidetes         | Bacteroidia    | 0           | 0            | 9            | 0             |
| seq87   | Bacteroidetes         | Bacteroidia    | 0           | 0            | 0            | 0             |
| seq90   | Bacteroidetes         | Bacteroidia    | 0           | 0            | 0            | 0             |
| seq111  | Bacteroidetes         | Bacteroidia    | 0           | 0            | 0            | 7             |
| seq132  | Bacteroidetes         | Bacteroidia    | 501         | 570          | 849          | 350           |
| seq152  | Bacteroidetes         | Bacteroidia    | 0           | 0            | 0            | 0             |
| seq178  | Bacteroidetes         | Bacteroidia    | 0           | 0            | 0            | 0             |
| seq180  | Bacteroidetes         | Bacteroidia    | 0           | 0            | 0            | 0             |
| seq185  | Bacteroidetes         | Bacteroidia    | 50          | 0            | 0            | 0             |
| seq192  | Bacteroidetes         | Bacteroidia    | 0           | 66           | 3032         | 1721          |

Sequence Count Table

|         | Phylum                | Class          | Subject19WK0 | Subject19WK12 | Subject20WK0 | Subject20WK12 |
|---------|-----------------------|----------------|--------------|---------------|--------------|---------------|
| seq1885 | Actinobacteria        | Actinobacteria | 0            | 0             | 0            | 0             |
| seq1764 | Actinobacteria        | Actinobacteria | 0            | 0             | 0            | 0             |
| seq906  | Actinobacteria        | Coriobacteriia | 0            | 0             | 0            | 0             |
| seq912  | Actinobacteria        | Coriobacteriia | 0            | 0             | 0            | 0             |
| seq931  | Actinobacteria        | Coriobacteriia | 0            | 0             | 0            | 0             |
| seq1256 | Actinobacteria        | Coriobacteriia | 0            | 0             | 0            | 0             |
|         | <b>Actinobacteria</b> | <b>TOTAL</b>   | <b>5131</b>  | <b>10552</b>  | <b>2096</b>  | <b>4049</b>   |
|         |                       |                |              |               |              |               |
| seq1    | Bacteroidetes         | Bacteroidia    | 0            | 0             | 201          | 1595          |
| seq9    | Bacteroidetes         | Bacteroidia    | 0            | 0             | 0            | 14            |
| seq10   | Bacteroidetes         | Bacteroidia    | 7302         | 8396          | 66           | 0             |
| seq11   | Bacteroidetes         | Bacteroidia    | 22647        | 29325         | 419          | 506           |
| seq14   | Bacteroidetes         | Bacteroidia    | 0            | 0             | 0            | 0             |
| seq19   | Bacteroidetes         | Bacteroidia    | 0            | 0             | 0            | 0             |
| seq20   | Bacteroidetes         | Bacteroidia    | 0            | 0             | 0            | 0             |
| seq33   | Bacteroidetes         | Bacteroidia    | 1095         | 2596          | 22           | 0             |
| seq34   | Bacteroidetes         | Bacteroidia    | 7875         | 7651          | 240          | 65            |
| seq38   | Bacteroidetes         | Bacteroidia    | 0            | 0             | 0            | 15            |
| seq47   | Bacteroidetes         | Bacteroidia    | 4784         | 6398          | 0            | 0             |
| seq51   | Bacteroidetes         | Bacteroidia    | 587          | 901           | 42           | 0             |
| seq68   | Bacteroidetes         | Bacteroidia    | 0            | 0             | 437          | 928           |
| seq73   | Bacteroidetes         | Bacteroidia    | 0            | 0             | 0            | 0             |
| seq76   | Bacteroidetes         | Bacteroidia    | 0            | 0             | 22           | 34            |
| seq87   | Bacteroidetes         | Bacteroidia    | 0            | 0             | 0            | 0             |
| seq90   | Bacteroidetes         | Bacteroidia    | 0            | 0             | 0            | 0             |
| seq111  | Bacteroidetes         | Bacteroidia    | 0            | 0             | 0            | 0             |
| seq132  | Bacteroidetes         | Bacteroidia    | 0            | 0             | 0            | 0             |
| seq152  | Bacteroidetes         | Bacteroidia    | 0            | 0             | 0            | 0             |
| seq178  | Bacteroidetes         | Bacteroidia    | 0            | 0             | 0            | 0             |
| seq180  | Bacteroidetes         | Bacteroidia    | 0            | 0             | 0            | 0             |
| seq185  | Bacteroidetes         | Bacteroidia    | 0            | 0             | 0            | 0             |
| seq192  | Bacteroidetes         | Bacteroidia    | 0            | 0             | 0            | 0             |

Sequence Count Table

|         | Phylum                | Class          | Subject7WK0  | Subject7WK12 | Subject21WK0 | Subject21WK12 |
|---------|-----------------------|----------------|--------------|--------------|--------------|---------------|
| seq1885 | Actinobacteria        | Actinobacteria | 0            | 0            | 0            | 0             |
| seq1764 | Actinobacteria        | Actinobacteria | 0            | 0            | 0            | 0             |
| seq906  | Actinobacteria        | Coriobacteriia | 0            | 0            | 0            | 0             |
| seq912  | Actinobacteria        | Coriobacteriia | 0            | 0            | 0            | 0             |
| seq931  | Actinobacteria        | Coriobacteriia | 0            | 0            | 0            | 0             |
| seq1256 | Actinobacteria        | Coriobacteriia | 0            | 0            | 0            | 0             |
|         | <b>Actinobacteria</b> | <b>TOTAL</b>   | <b>13307</b> | <b>10003</b> | <b>6879</b>  | <b>12269</b>  |
|         |                       |                |              |              |              |               |
| seq1    | Bacteroidetes         | Bacteroidia    | 6686         | 16927        | 15388        | 35134         |
| seq9    | Bacteroidetes         | Bacteroidia    | 4248         | 5284         | 0            | 0             |
| seq10   | Bacteroidetes         | Bacteroidia    | 1805         | 3000         | 3140         | 2498          |
| seq11   | Bacteroidetes         | Bacteroidia    | 0            | 0            | 0            | 0             |
| seq14   | Bacteroidetes         | Bacteroidia    | 0            | 0            | 0            | 0             |
| seq19   | Bacteroidetes         | Bacteroidia    | 0            | 0            | 0            | 0             |
| seq20   | Bacteroidetes         | Bacteroidia    | 0            | 0            | 129          | 1050          |
| seq33   | Bacteroidetes         | Bacteroidia    | 137          | 218          | 1447         | 1713          |
| seq34   | Bacteroidetes         | Bacteroidia    | 42           | 465          | 0            | 56            |
| seq38   | Bacteroidetes         | Bacteroidia    | 1074         | 1427         | 734          | 2065          |
| seq47   | Bacteroidetes         | Bacteroidia    | 141          | 1544         | 0            | 0             |
| seq51   | Bacteroidetes         | Bacteroidia    | 258          | 926          | 1716         | 2362          |
| seq68   | Bacteroidetes         | Bacteroidia    | 0            | 59           | 419          | 938           |
| seq73   | Bacteroidetes         | Bacteroidia    | 0            | 0            | 0            | 0             |
| seq76   | Bacteroidetes         | Bacteroidia    | 0            | 0            | 0            | 0             |
| seq87   | Bacteroidetes         | Bacteroidia    | 0            | 0            | 0            | 0             |
| seq90   | Bacteroidetes         | Bacteroidia    | 4880         | 7809         | 0            | 0             |
| seq111  | Bacteroidetes         | Bacteroidia    | 0            | 0            | 0            | 0             |
| seq132  | Bacteroidetes         | Bacteroidia    | 0            | 0            | 0            | 0             |
| seq152  | Bacteroidetes         | Bacteroidia    | 2798         | 3431         | 0            | 0             |
| seq178  | Bacteroidetes         | Bacteroidia    | 622          | 1968         | 0            | 0             |
| seq180  | Bacteroidetes         | Bacteroidia    | 1061         | 2008         | 0            | 0             |
| seq185  | Bacteroidetes         | Bacteroidia    | 0            | 72           | 0            | 0             |
| seq192  | Bacteroidetes         | Bacteroidia    | 0            | 0            | 0            | 0             |



Sequence Count Table

|         | Phylum                | Class          | Subject8WK0  | Subject8WK12 | Subject9WK0 | Subject9WK12 |
|---------|-----------------------|----------------|--------------|--------------|-------------|--------------|
| seq1885 | Actinobacteria        | Actinobacteria | 0            | 0            | 0           | 0            |
| seq1764 | Actinobacteria        | Actinobacteria | 0            | 0            | 0           | 0            |
| seq906  | Actinobacteria        | Coriobacteriia | 0            | 0            | 0           | 0            |
| seq912  | Actinobacteria        | Coriobacteriia | 0            | 0            | 0           | 0            |
| seq931  | Actinobacteria        | Coriobacteriia | 0            | 0            | 0           | 0            |
| seq1256 | Actinobacteria        | Coriobacteriia | 0            | 0            | 0           | 0            |
|         | <b>Actinobacteria</b> | <b>TOTAL</b>   | <b>12885</b> | <b>9975</b>  | <b>3081</b> | <b>4169</b>  |
|         |                       |                |              |              |             |              |
| seq1    | Bacteroidetes         | Bacteroidia    | 22580        | 26346        | 12189       | 37121        |
| seq9    | Bacteroidetes         | Bacteroidia    | 0            | 0            | 0           | 0            |
| seq10   | Bacteroidetes         | Bacteroidia    | 0            | 0            | 2302        | 1079         |
| seq11   | Bacteroidetes         | Bacteroidia    | 0            | 0            | 0           | 0            |
| seq14   | Bacteroidetes         | Bacteroidia    | 0            | 0            | 0           | 0            |
| seq19   | Bacteroidetes         | Bacteroidia    | 0            | 0            | 0           | 0            |
| seq20   | Bacteroidetes         | Bacteroidia    | 0            | 0            | 647         | 265          |
| seq33   | Bacteroidetes         | Bacteroidia    | 1246         | 1355         | 1458        | 1601         |
| seq34   | Bacteroidetes         | Bacteroidia    | 0            | 0            | 545         | 904          |
| seq38   | Bacteroidetes         | Bacteroidia    | 567          | 1623         | 1346        | 5916         |
| seq47   | Bacteroidetes         | Bacteroidia    | 0            | 0            | 0           | 0            |
| seq51   | Bacteroidetes         | Bacteroidia    | 5561         | 6689         | 0           | 0            |
| seq68   | Bacteroidetes         | Bacteroidia    | 83           | 51           | 1082        | 1854         |
| seq73   | Bacteroidetes         | Bacteroidia    | 0            | 0            | 0           | 0            |
| seq76   | Bacteroidetes         | Bacteroidia    | 0            | 0            | 2904        | 1422         |
| seq87   | Bacteroidetes         | Bacteroidia    | 0            | 0            | 0           | 0            |
| seq90   | Bacteroidetes         | Bacteroidia    | 0            | 0            | 0           | 13           |
| seq111  | Bacteroidetes         | Bacteroidia    | 0            | 0            | 0           | 0            |
| seq132  | Bacteroidetes         | Bacteroidia    | 0            | 0            | 0           | 0            |
| seq152  | Bacteroidetes         | Bacteroidia    | 0            | 0            | 0           | 16           |
| seq178  | Bacteroidetes         | Bacteroidia    | 0            | 0            | 0           | 0            |
| seq180  | Bacteroidetes         | Bacteroidia    | 0            | 0            | 0           | 0            |
| seq185  | Bacteroidetes         | Bacteroidia    | 407          | 424          | 0           | 0            |
| seq192  | Bacteroidetes         | Bacteroidia    | 0            | 0            | 0           | 0            |

Sequence Count Table

|         | Phylum                | Class          | Subject10WK0 | Subject10WK12 | Subject22WK0 | Subject22WK12 |
|---------|-----------------------|----------------|--------------|---------------|--------------|---------------|
| seq1885 | Actinobacteria        | Actinobacteria | 0            | 0             | 0            | 0             |
| seq1764 | Actinobacteria        | Actinobacteria | 0            | 0             | 0            | 0             |
| seq906  | Actinobacteria        | Coriobacteriia | 0            | 0             | 0            | 0             |
| seq912  | Actinobacteria        | Coriobacteriia | 0            | 0             | 0            | 0             |
| seq931  | Actinobacteria        | Coriobacteriia | 0            | 0             | 92           | 59            |
| seq1256 | Actinobacteria        | Coriobacteriia | 0            | 0             | 0            | 0             |
|         | <b>Actinobacteria</b> | <b>TOTAL</b>   | <b>5169</b>  | <b>786</b>    | <b>20998</b> | <b>15290</b>  |
|         |                       |                |              |               |              |               |
| seq1    | Bacteroidetes         | Bacteroidia    | 52           | 0             | 1599         | 1337          |
| seq9    | Bacteroidetes         | Bacteroidia    | 0            | 0             | 0            | 0             |
| seq10   | Bacteroidetes         | Bacteroidia    | 6383         | 2236          | 332          | 583           |
| seq11   | Bacteroidetes         | Bacteroidia    | 0            | 0             | 0            | 0             |
| seq14   | Bacteroidetes         | Bacteroidia    | 0            | 0             | 153          | 204           |
| seq19   | Bacteroidetes         | Bacteroidia    | 0            | 0             | 186          | 150           |
| seq20   | Bacteroidetes         | Bacteroidia    | 2698         | 1495          | 197          | 241           |
| seq33   | Bacteroidetes         | Bacteroidia    | 8376         | 5951          | 130          | 202           |
| seq34   | Bacteroidetes         | Bacteroidia    | 330          | 463           | 34           | 55            |
| seq38   | Bacteroidetes         | Bacteroidia    | 0            | 0             | 76           | 109           |
| seq47   | Bacteroidetes         | Bacteroidia    | 1045         | 920           | 0            | 97            |
| seq51   | Bacteroidetes         | Bacteroidia    | 279          | 100           | 114          | 95            |
| seq68   | Bacteroidetes         | Bacteroidia    | 2102         | 2276          | 0            | 0             |
| seq73   | Bacteroidetes         | Bacteroidia    | 0            | 0             | 0            | 0             |
| seq76   | Bacteroidetes         | Bacteroidia    | 0            | 0             | 1169         | 405           |
| seq87   | Bacteroidetes         | Bacteroidia    | 0            | 0             | 78           | 69            |
| seq90   | Bacteroidetes         | Bacteroidia    | 0            | 0             | 0            | 0             |
| seq111  | Bacteroidetes         | Bacteroidia    | 0            | 0             | 0            | 0             |
| seq132  | Bacteroidetes         | Bacteroidia    | 0            | 0             | 0            | 0             |
| seq152  | Bacteroidetes         | Bacteroidia    | 0            | 0             | 0            | 0             |
| seq178  | Bacteroidetes         | Bacteroidia    | 0            | 0             | 0            | 0             |
| seq180  | Bacteroidetes         | Bacteroidia    | 0            | 0             | 0            | 0             |
| seq185  | Bacteroidetes         | Bacteroidia    | 0            | 0             | 99           | 175           |
| seq192  | Bacteroidetes         | Bacteroidia    | 0            | 0             | 0            | 0             |

Sequence Count Table

|         | Phylum                | Class          | Subject23WK0 | Subject23WK12 | Subject24WK0 | Subject24WK12 |
|---------|-----------------------|----------------|--------------|---------------|--------------|---------------|
| seq1885 | Actinobacteria        | Actinobacteria | 0            | 0             | 0            | 0             |
| seq1764 | Actinobacteria        | Actinobacteria | 0            | 0             | 0            | 0             |
| seq906  | Actinobacteria        | Coriobacteriia | 0            | 0             | 0            | 0             |
| seq912  | Actinobacteria        | Coriobacteriia | 0            | 0             | 24           | 0             |
| seq931  | Actinobacteria        | Coriobacteriia | 0            | 0             | 0            | 0             |
| seq1256 | Actinobacteria        | Coriobacteriia | 0            | 0             | 0            | 0             |
|         | <b>Actinobacteria</b> | <b>TOTAL</b>   | <b>3733</b>  | <b>5644</b>   | <b>2163</b>  | <b>2190</b>   |
|         |                       |                |              |               |              |               |
| seq1    | Bacteroidetes         | Bacteroidia    | 4316         | 5650          | 3069         | 5852          |
| seq9    | Bacteroidetes         | Bacteroidia    | 635          | 870           | 3953         | 15274         |
| seq10   | Bacteroidetes         | Bacteroidia    | 213          | 751           | 0            | 0             |
| seq11   | Bacteroidetes         | Bacteroidia    | 178          | 679           | 0            | 0             |
| seq14   | Bacteroidetes         | Bacteroidia    | 0            | 0             | 0            | 0             |
| seq19   | Bacteroidetes         | Bacteroidia    | 1066         | 1603          | 3041         | 4021          |
| seq20   | Bacteroidetes         | Bacteroidia    | 153          | 338           | 2080         | 1366          |
| seq33   | Bacteroidetes         | Bacteroidia    | 628          | 746           | 100          | 420           |
| seq34   | Bacteroidetes         | Bacteroidia    | 0            | 0             | 308          | 1346          |
| seq38   | Bacteroidetes         | Bacteroidia    | 92           | 423           | 331          | 553           |
| seq47   | Bacteroidetes         | Bacteroidia    | 0            | 61            | 0            | 0             |
| seq51   | Bacteroidetes         | Bacteroidia    | 339          | 231           | 0            | 0             |
| seq68   | Bacteroidetes         | Bacteroidia    | 0            | 0             | 0            | 0             |
| seq73   | Bacteroidetes         | Bacteroidia    | 0            | 0             | 2204         | 1593          |
| seq76   | Bacteroidetes         | Bacteroidia    | 167          | 470           | 0            | 0             |
| seq87   | Bacteroidetes         | Bacteroidia    | 0            | 0             | 0            | 0             |
| seq90   | Bacteroidetes         | Bacteroidia    | 0            | 0             | 0            | 0             |
| seq111  | Bacteroidetes         | Bacteroidia    | 0            | 0             | 0            | 0             |
| seq132  | Bacteroidetes         | Bacteroidia    | 68           | 131           | 389          | 0             |
| seq152  | Bacteroidetes         | Bacteroidia    | 0            | 0             | 0            | 0             |
| seq178  | Bacteroidetes         | Bacteroidia    | 0            | 0             | 1164         | 862           |
| seq180  | Bacteroidetes         | Bacteroidia    | 0            | 0             | 0            | 0             |
| seq185  | Bacteroidetes         | Bacteroidia    | 0            | 0             | 0            | 0             |
| seq192  | Bacteroidetes         | Bacteroidia    | 0            | 0             | 0            | 0             |

Sequence Count Table

|                | <b>Phylum</b>         | <b>Class</b>   | <b>Subject11WK0</b> | <b>Subject11WK12</b> | <b>Subject12WK0</b> | <b>Subject12WK12</b> |
|----------------|-----------------------|----------------|---------------------|----------------------|---------------------|----------------------|
| <b>seq1885</b> | Actinobacteria        | Actinobacteria | 0                   | 0                    | 0                   | 0                    |
| <b>seq1764</b> | Actinobacteria        | Actinobacteria | 0                   | 0                    | 0                   | 0                    |
| <b>seq906</b>  | Actinobacteria        | Coriobacteriia | 0                   | 0                    | 0                   | 0                    |
| <b>seq912</b>  | Actinobacteria        | Coriobacteriia | 0                   | 0                    | 0                   | 0                    |
| <b>seq931</b>  | Actinobacteria        | Coriobacteriia | 0                   | 0                    | 0                   | 0                    |
| <b>seq1256</b> | Actinobacteria        | Coriobacteriia | 0                   | 0                    | 0                   | 0                    |
|                | <b>Actinobacteria</b> | <b>TOTAL</b>   | <b>1085</b>         | <b>338</b>           | <b>9629</b>         | <b>17941</b>         |
|                |                       |                |                     |                      |                     |                      |
| <b>seq1</b>    | Bacteroidetes         | Bacteroidia    | 0                   | 0                    | 5572                | 12151                |
| <b>seq9</b>    | Bacteroidetes         | Bacteroidia    | 0                   | 0                    | 7520                | 12078                |
| <b>seq10</b>   | Bacteroidetes         | Bacteroidia    | 7118                | 12107                | 1027                | 1760                 |
| <b>seq11</b>   | Bacteroidetes         | Bacteroidia    | 10827               | 18647                | 0                   | 0                    |
| <b>seq14</b>   | Bacteroidetes         | Bacteroidia    | 0                   | 0                    | 0                   | 0                    |
| <b>seq19</b>   | Bacteroidetes         | Bacteroidia    | 0                   | 0                    | 1424                | 3603                 |
| <b>seq20</b>   | Bacteroidetes         | Bacteroidia    | 0                   | 0                    | 284                 | 476                  |
| <b>seq33</b>   | Bacteroidetes         | Bacteroidia    | 3330                | 5136                 | 159                 | 237                  |
| <b>seq34</b>   | Bacteroidetes         | Bacteroidia    | 459                 | 990                  | 150                 | 423                  |
| <b>seq38</b>   | Bacteroidetes         | Bacteroidia    | 0                   | 0                    | 192                 | 384                  |
| <b>seq47</b>   | Bacteroidetes         | Bacteroidia    | 2148                | 4481                 | 588                 | 1776                 |
| <b>seq51</b>   | Bacteroidetes         | Bacteroidia    | 0                   | 0                    | 0                   | 0                    |
| <b>seq68</b>   | Bacteroidetes         | Bacteroidia    | 1449                | 3590                 | 0                   | 0                    |
| <b>seq73</b>   | Bacteroidetes         | Bacteroidia    | 0                   | 0                    | 943                 | 2041                 |
| <b>seq76</b>   | Bacteroidetes         | Bacteroidia    | 0                   | 0                    | 0                   | 0                    |
| <b>seq87</b>   | Bacteroidetes         | Bacteroidia    | 0                   | 0                    | 0                   | 0                    |
| <b>seq90</b>   | Bacteroidetes         | Bacteroidia    | 0                   | 0                    | 0                   | 0                    |
| <b>seq111</b>  | Bacteroidetes         | Bacteroidia    | 0                   | 0                    | 0                   | 0                    |
| <b>seq132</b>  | Bacteroidetes         | Bacteroidia    | 0                   | 0                    | 0                   | 0                    |
| <b>seq152</b>  | Bacteroidetes         | Bacteroidia    | 0                   | 0                    | 0                   | 0                    |
| <b>seq178</b>  | Bacteroidetes         | Bacteroidia    | 0                   | 0                    | 0                   | 0                    |
| <b>seq180</b>  | Bacteroidetes         | Bacteroidia    | 0                   | 0                    | 0                   | 0                    |
| <b>seq185</b>  | Bacteroidetes         | Bacteroidia    | 0                   | 0                    | 0                   | 0                    |
| <b>seq192</b>  | Bacteroidetes         | Bacteroidia    | 0                   | 0                    | 255                 | 488                  |

Sequence Count Table

|         | Phylum                | Class          | Subject25WK0 | Subject25WK12 | Subject38WK0 | Subject38WK12 |
|---------|-----------------------|----------------|--------------|---------------|--------------|---------------|
| seq1885 | Actinobacteria        | Actinobacteria | 0            | 0             | 0            | 0             |
| seq1764 | Actinobacteria        | Actinobacteria | 0            | 0             | 0            | 0             |
| seq906  | Actinobacteria        | Coriobacteriia | 0            | 0             | 0            | 0             |
| seq912  | Actinobacteria        | Coriobacteriia | 41           | 11            | 0            | 0             |
| seq931  | Actinobacteria        | Coriobacteriia | 0            | 0             | 0            | 0             |
| seq1256 | Actinobacteria        | Coriobacteriia | 0            | 0             | 0            | 0             |
|         | <b>Actinobacteria</b> | <b>TOTAL</b>   | <b>43806</b> | <b>19898</b>  | <b>0</b>     | <b>0</b>      |
|         |                       |                |              |               |              |               |
| seq1    | Bacteroidetes         | Bacteroidia    | 1484         | 2829          | 65           | 32            |
| seq9    | Bacteroidetes         | Bacteroidia    | 0            | 0             | 0            | 0             |
| seq10   | Bacteroidetes         | Bacteroidia    | 0            | 0             | 0            | 0             |
| seq11   | Bacteroidetes         | Bacteroidia    | 3508         | 1570          | 0            | 0             |
| seq14   | Bacteroidetes         | Bacteroidia    | 0            | 0             | 0            | 0             |
| seq19   | Bacteroidetes         | Bacteroidia    | 0            | 0             | 0            | 0             |
| seq20   | Bacteroidetes         | Bacteroidia    | 6851         | 2521          | 0            | 0             |
| seq33   | Bacteroidetes         | Bacteroidia    | 137          | 205           | 0            | 0             |
| seq34   | Bacteroidetes         | Bacteroidia    | 80           | 42            | 0            | 0             |
| seq38   | Bacteroidetes         | Bacteroidia    | 513          | 1441          | 0            | 0             |
| seq47   | Bacteroidetes         | Bacteroidia    | 369          | 163           | 0            | 0             |
| seq51   | Bacteroidetes         | Bacteroidia    | 1607         | 656           | 0            | 0             |
| seq68   | Bacteroidetes         | Bacteroidia    | 25           | 154           | 0            | 0             |
| seq73   | Bacteroidetes         | Bacteroidia    | 0            | 0             | 0            | 0             |
| seq76   | Bacteroidetes         | Bacteroidia    | 0            | 0             | 0            | 0             |
| seq87   | Bacteroidetes         | Bacteroidia    | 0            | 0             | 0            | 0             |
| seq90   | Bacteroidetes         | Bacteroidia    | 0            | 0             | 0            | 0             |
| seq111  | Bacteroidetes         | Bacteroidia    | 0            | 0             | 0            | 0             |
| seq132  | Bacteroidetes         | Bacteroidia    | 434          | 758           | 0            | 0             |
| seq152  | Bacteroidetes         | Bacteroidia    | 0            | 0             | 0            | 0             |
| seq178  | Bacteroidetes         | Bacteroidia    | 0            | 0             | 0            | 0             |
| seq180  | Bacteroidetes         | Bacteroidia    | 0            | 0             | 0            | 0             |
| seq185  | Bacteroidetes         | Bacteroidia    | 0            | 0             | 0            | 0             |
| seq192  | Bacteroidetes         | Bacteroidia    | 0            | 0             | 0            | 0             |

Sequence Count Table

|         | Phylum                | Class          | Subject31WK0 | Subject31WK12 | Subject32WK0 | Subject32WK12 |
|---------|-----------------------|----------------|--------------|---------------|--------------|---------------|
| seq1885 | Actinobacteria        | Actinobacteria | 0            | 0             | 0            | 0             |
| seq1764 | Actinobacteria        | Actinobacteria | 0            | 0             | 0            | 0             |
| seq906  | Actinobacteria        | Coriobacteriia | 0            | 0             | 0            | 0             |
| seq912  | Actinobacteria        | Coriobacteriia | 0            | 0             | 0            | 0             |
| seq931  | Actinobacteria        | Coriobacteriia | 0            | 0             | 0            | 0             |
| seq1256 | Actinobacteria        | Coriobacteriia | 0            | 0             | 0            | 0             |
|         | <b>Actinobacteria</b> | <b>TOTAL</b>   | <b>0</b>     | <b>0</b>      | <b>7312</b>  | <b>0</b>      |
|         |                       |                |              |               |              |               |
| seq1    | Bacteroidetes         | Bacteroidia    | 169          | 0             | 5089         | 78            |
| seq9    | Bacteroidetes         | Bacteroidia    | 0            | 0             | 0            | 0             |
| seq10   | Bacteroidetes         | Bacteroidia    | 0            | 0             | 3590         | 22            |
| seq11   | Bacteroidetes         | Bacteroidia    | 0            | 0             | 1754         | 0             |
| seq14   | Bacteroidetes         | Bacteroidia    | 0            | 0             | 0            | 0             |
| seq19   | Bacteroidetes         | Bacteroidia    | 0            | 0             | 5355         | 17            |
| seq20   | Bacteroidetes         | Bacteroidia    | 0            | 0             | 0            | 0             |
| seq33   | Bacteroidetes         | Bacteroidia    | 0            | 0             | 0            | 0             |
| seq34   | Bacteroidetes         | Bacteroidia    | 0            | 0             | 2780         | 12            |
| seq38   | Bacteroidetes         | Bacteroidia    | 0            | 0             | 0            | 0             |
| seq47   | Bacteroidetes         | Bacteroidia    | 0            | 0             | 0            | 0             |
| seq51   | Bacteroidetes         | Bacteroidia    | 0            | 0             | 0            | 0             |
| seq68   | Bacteroidetes         | Bacteroidia    | 0            | 0             | 0            | 0             |
| seq73   | Bacteroidetes         | Bacteroidia    | 0            | 0             | 0            | 0             |
| seq76   | Bacteroidetes         | Bacteroidia    | 0            | 0             | 0            | 0             |
| seq87   | Bacteroidetes         | Bacteroidia    | 0            | 0             | 0            | 0             |
| seq90   | Bacteroidetes         | Bacteroidia    | 0            | 0             | 0            | 0             |
| seq111  | Bacteroidetes         | Bacteroidia    | 0            | 0             | 0            | 0             |
| seq132  | Bacteroidetes         | Bacteroidia    | 0            | 0             | 0            | 0             |
| seq152  | Bacteroidetes         | Bacteroidia    | 0            | 0             | 0            | 0             |
| seq178  | Bacteroidetes         | Bacteroidia    | 0            | 0             | 0            | 0             |
| seq180  | Bacteroidetes         | Bacteroidia    | 0            | 0             | 0            | 0             |
| seq185  | Bacteroidetes         | Bacteroidia    | 0            | 0             | 0            | 0             |
| seq192  | Bacteroidetes         | Bacteroidia    | 0            | 0             | 0            | 0             |

Sequence Count Table

|         | Phylum                | Class          | Subject13WK0 | Subject13WK12 | Subject39WK0 | Subject39WK12 |
|---------|-----------------------|----------------|--------------|---------------|--------------|---------------|
| seq1885 | Actinobacteria        | Actinobacteria | 0            | 0             | 0            | 0             |
| seq1764 | Actinobacteria        | Actinobacteria | 0            | 0             | 0            | 0             |
| seq906  | Actinobacteria        | Coriobacteriia | 0            | 0             | 0            | 0             |
| seq912  | Actinobacteria        | Coriobacteriia | 0            | 0             | 0            | 0             |
| seq931  | Actinobacteria        | Coriobacteriia | 0            | 0             | 0            | 0             |
| seq1256 | Actinobacteria        | Coriobacteriia | 0            | 0             | 0            | 0             |
|         | <b>Actinobacteria</b> | <b>TOTAL</b>   | <b>3951</b>  | <b>1109</b>   | <b>0</b>     | <b>14522</b>  |
|         |                       |                |              |               |              |               |
| seq1    | Bacteroidetes         | Bacteroidia    | 4824         | 2554          | 0            | 9705          |
| seq9    | Bacteroidetes         | Bacteroidia    | 2662         | 529           | 0            | 0             |
| seq10   | Bacteroidetes         | Bacteroidia    | 1131         | 438           | 0            | 3952          |
| seq11   | Bacteroidetes         | Bacteroidia    | 0            | 0             | 0            | 0             |
| seq14   | Bacteroidetes         | Bacteroidia    | 0            | 0             | 0            | 0             |
| seq19   | Bacteroidetes         | Bacteroidia    | 2211         | 1195          | 0            | 0             |
| seq20   | Bacteroidetes         | Bacteroidia    | 4903         | 1610          | 0            | 0             |
| seq33   | Bacteroidetes         | Bacteroidia    | 663          | 207           | 0            | 353           |
| seq34   | Bacteroidetes         | Bacteroidia    | 67           | 182           | 0            | 0             |
| seq38   | Bacteroidetes         | Bacteroidia    | 253          | 255           | 0            | 1183          |
| seq47   | Bacteroidetes         | Bacteroidia    | 122          | 0             | 0            | 732           |
| seq51   | Bacteroidetes         | Bacteroidia    | 265          | 0             | 0            | 2446          |
| seq68   | Bacteroidetes         | Bacteroidia    | 0            | 0             | 0            | 51            |
| seq73   | Bacteroidetes         | Bacteroidia    | 0            | 0             | 0            | 0             |
| seq76   | Bacteroidetes         | Bacteroidia    | 3077         | 3134          | 0            | 597           |
| seq87   | Bacteroidetes         | Bacteroidia    | 0            | 0             | 0            | 0             |
| seq90   | Bacteroidetes         | Bacteroidia    | 0            | 0             | 10           | 2198          |
| seq111  | Bacteroidetes         | Bacteroidia    | 0            | 0             | 0            | 0             |
| seq132  | Bacteroidetes         | Bacteroidia    | 537          | 78            | 0            | 0             |
| seq152  | Bacteroidetes         | Bacteroidia    | 0            | 0             | 0            | 0             |
| seq178  | Bacteroidetes         | Bacteroidia    | 0            | 0             | 0            | 0             |
| seq180  | Bacteroidetes         | Bacteroidia    | 0            | 0             | 0            | 0             |
| seq185  | Bacteroidetes         | Bacteroidia    | 0            | 0             | 0            | 0             |
| seq192  | Bacteroidetes         | Bacteroidia    | 0            | 0             | 0            | 0             |

Sequence Count Table

|                | <b>Phylum</b>         | <b>Class</b>   | <b>Subject26WK0</b> | <b>Subject26WK12</b> | <b>Subject14WK0</b> | <b>Subject14WK12</b> |
|----------------|-----------------------|----------------|---------------------|----------------------|---------------------|----------------------|
| <b>seq1885</b> | Actinobacteria        | Actinobacteria | 0                   | 0                    | 0                   | 0                    |
| <b>seq1764</b> | Actinobacteria        | Actinobacteria | 0                   | 0                    | 0                   | 0                    |
| <b>seq906</b>  | Actinobacteria        | Coriobacteriia | 0                   | 0                    | 0                   | 0                    |
| <b>seq912</b>  | Actinobacteria        | Coriobacteriia | 0                   | 0                    | 0                   | 0                    |
| <b>seq931</b>  | Actinobacteria        | Coriobacteriia | 0                   | 0                    | 0                   | 0                    |
| <b>seq1256</b> | Actinobacteria        | Coriobacteriia | 0                   | 0                    | 0                   | 0                    |
|                | <b>Actinobacteria</b> | <b>TOTAL</b>   | <b>7069</b>         | <b>3895</b>          | <b>3438</b>         | <b>4866</b>          |
|                |                       |                |                     |                      |                     |                      |
| <b>seq1</b>    | Bacteroidetes         | Bacteroidia    | 10768               | 28140                | 8592                | 5770                 |
| <b>seq9</b>    | Bacteroidetes         | Bacteroidia    | 0                   | 0                    | 5296                | 81                   |
| <b>seq10</b>   | Bacteroidetes         | Bacteroidia    | 4897                | 2461                 | 0                   | 0                    |
| <b>seq11</b>   | Bacteroidetes         | Bacteroidia    | 0                   | 0                    | 0                   | 0                    |
| <b>seq14</b>   | Bacteroidetes         | Bacteroidia    | 0                   | 0                    | 0                   | 0                    |
| <b>seq19</b>   | Bacteroidetes         | Bacteroidia    | 0                   | 0                    | 3617                | 3108                 |
| <b>seq20</b>   | Bacteroidetes         | Bacteroidia    | 432                 | 848                  | 1242                | 838                  |
| <b>seq33</b>   | Bacteroidetes         | Bacteroidia    | 366                 | 1191                 | 600                 | 110                  |
| <b>seq34</b>   | Bacteroidetes         | Bacteroidia    | 124                 | 581                  | 309                 | 162                  |
| <b>seq38</b>   | Bacteroidetes         | Bacteroidia    | 1370                | 975                  | 337                 | 380                  |
| <b>seq47</b>   | Bacteroidetes         | Bacteroidia    | 0                   | 199                  | 461                 | 123                  |
| <b>seq51</b>   | Bacteroidetes         | Bacteroidia    | 376                 | 1446                 | 0                   | 0                    |
| <b>seq68</b>   | Bacteroidetes         | Bacteroidia    | 0                   | 0                    | 84                  | 58                   |
| <b>seq73</b>   | Bacteroidetes         | Bacteroidia    | 0                   | 0                    | 0                   | 0                    |
| <b>seq76</b>   | Bacteroidetes         | Bacteroidia    | 0                   | 0                    | 0                   | 0                    |
| <b>seq87</b>   | Bacteroidetes         | Bacteroidia    | 0                   | 0                    | 0                   | 0                    |
| <b>seq90</b>   | Bacteroidetes         | Bacteroidia    | 0                   | 0                    | 0                   | 0                    |
| <b>seq111</b>  | Bacteroidetes         | Bacteroidia    | 0                   | 0                    | 0                   | 0                    |
| <b>seq132</b>  | Bacteroidetes         | Bacteroidia    | 148                 | 1689                 | 0                   | 0                    |
| <b>seq152</b>  | Bacteroidetes         | Bacteroidia    | 0                   | 0                    | 0                   | 0                    |
| <b>seq178</b>  | Bacteroidetes         | Bacteroidia    | 0                   | 0                    | 0                   | 0                    |
| <b>seq180</b>  | Bacteroidetes         | Bacteroidia    | 0                   | 0                    | 0                   | 0                    |
| <b>seq185</b>  | Bacteroidetes         | Bacteroidia    | 2283                | 340                  | 224                 | 1986                 |
| <b>seq192</b>  | Bacteroidetes         | Bacteroidia    | 0                   | 0                    | 0                   | 0                    |



Sequence Count Table

|         | Phylum                | Class          | Subject27WK0 | Subject27WK12 | Subject15WK0 | Subject15WK12 |
|---------|-----------------------|----------------|--------------|---------------|--------------|---------------|
| seq1885 | Actinobacteria        | Actinobacteria | 0            | 0             | 0            | 0             |
| seq1764 | Actinobacteria        | Actinobacteria | 0            | 0             | 0            | 0             |
| seq906  | Actinobacteria        | Coriobacteriia | 0            | 0             | 0            | 0             |
| seq912  | Actinobacteria        | Coriobacteriia | 0            | 0             | 0            | 0             |
| seq931  | Actinobacteria        | Coriobacteriia | 0            | 0             | 0            | 0             |
| seq1256 | Actinobacteria        | Coriobacteriia | 0            | 0             | 0            | 0             |
|         | <b>Actinobacteria</b> | <b>TOTAL</b>   | <b>7232</b>  | <b>7851</b>   | <b>2314</b>  | <b>983</b>    |
|         |                       |                |              |               |              |               |
| seq1    | Bacteroidetes         | Bacteroidia    | 5857         | 4107          | 7917         | 6131          |
| seq9    | Bacteroidetes         | Bacteroidia    | 8662         | 9091          | 3156         | 6558          |
| seq10   | Bacteroidetes         | Bacteroidia    | 0            | 0             | 1751         | 1928          |
| seq11   | Bacteroidetes         | Bacteroidia    | 0            | 0             | 1821         | 1519          |
| seq14   | Bacteroidetes         | Bacteroidia    | 0            | 0             | 0            | 0             |
| seq19   | Bacteroidetes         | Bacteroidia    | 1216         | 1317          | 4863         | 4213          |
| seq20   | Bacteroidetes         | Bacteroidia    | 1076         | 1177          | 2058         | 1205          |
| seq33   | Bacteroidetes         | Bacteroidia    | 282          | 137           | 373          | 951           |
| seq34   | Bacteroidetes         | Bacteroidia    | 385          | 217           | 468          | 256           |
| seq38   | Bacteroidetes         | Bacteroidia    | 546          | 58            | 653          | 455           |
| seq47   | Bacteroidetes         | Bacteroidia    | 181          | 174           | 400          | 460           |
| seq51   | Bacteroidetes         | Bacteroidia    | 0            | 0             | 0            | 0             |
| seq68   | Bacteroidetes         | Bacteroidia    | 0            | 0             | 0            | 0             |
| seq73   | Bacteroidetes         | Bacteroidia    | 0            | 0             | 0            | 0             |
| seq76   | Bacteroidetes         | Bacteroidia    | 164          | 152           | 24           | 21            |
| seq87   | Bacteroidetes         | Bacteroidia    | 236          | 120           | 0            | 0             |
| seq90   | Bacteroidetes         | Bacteroidia    | 0            | 0             | 0            | 0             |
| seq111  | Bacteroidetes         | Bacteroidia    | 676          | 275           | 0            | 0             |
| seq132  | Bacteroidetes         | Bacteroidia    | 0            | 0             | 679          | 543           |
| seq152  | Bacteroidetes         | Bacteroidia    | 0            | 0             | 0            | 0             |
| seq178  | Bacteroidetes         | Bacteroidia    | 0            | 0             | 351          | 490           |
| seq180  | Bacteroidetes         | Bacteroidia    | 0            | 0             | 640          | 824           |
| seq185  | Bacteroidetes         | Bacteroidia    | 0            | 0             | 0            | 0             |
| seq192  | Bacteroidetes         | Bacteroidia    | 0            | 0             | 0            | 0             |

Sequence Count Table

|                | <b>Phylum</b>         | <b>Class</b>   | <b>Δ</b> |  |  |  |
|----------------|-----------------------|----------------|----------|--|--|--|
| <b>seq1885</b> | Actinobacteria        | Actinobacteria |          |  |  |  |
| <b>seq1764</b> | Actinobacteria        | Actinobacteria |          |  |  |  |
| <b>seq906</b>  | Actinobacteria        | Coriobacteriia |          |  |  |  |
| <b>seq912</b>  | Actinobacteria        | Coriobacteriia |          |  |  |  |
| <b>seq931</b>  | Actinobacteria        | Coriobacteriia |          |  |  |  |
| <b>seq1256</b> | Actinobacteria        | Coriobacteriia |          |  |  |  |
|                | <b>Actinobacteria</b> | <b>TOTAL</b>   |          |  |  |  |
|                |                       |                |          |  |  |  |
| <b>seq1</b>    | Bacteroidetes         | Bacteroidia    |          |  |  |  |
| <b>seq9</b>    | Bacteroidetes         | Bacteroidia    |          |  |  |  |
| <b>seq10</b>   | Bacteroidetes         | Bacteroidia    |          |  |  |  |
| <b>seq11</b>   | Bacteroidetes         | Bacteroidia    |          |  |  |  |
| <b>seq14</b>   | Bacteroidetes         | Bacteroidia    |          |  |  |  |
| <b>seq19</b>   | Bacteroidetes         | Bacteroidia    |          |  |  |  |
| <b>seq20</b>   | Bacteroidetes         | Bacteroidia    |          |  |  |  |
| <b>seq33</b>   | Bacteroidetes         | Bacteroidia    |          |  |  |  |
| <b>seq34</b>   | Bacteroidetes         | Bacteroidia    |          |  |  |  |
| <b>seq38</b>   | Bacteroidetes         | Bacteroidia    |          |  |  |  |
| <b>seq47</b>   | Bacteroidetes         | Bacteroidia    |          |  |  |  |
| <b>seq51</b>   | Bacteroidetes         | Bacteroidia    |          |  |  |  |
| <b>seq68</b>   | Bacteroidetes         | Bacteroidia    |          |  |  |  |
| <b>seq73</b>   | Bacteroidetes         | Bacteroidia    |          |  |  |  |
| <b>seq76</b>   | Bacteroidetes         | Bacteroidia    |          |  |  |  |
| <b>seq87</b>   | Bacteroidetes         | Bacteroidia    |          |  |  |  |
| <b>seq90</b>   | Bacteroidetes         | Bacteroidia    |          |  |  |  |
| <b>seq111</b>  | Bacteroidetes         | Bacteroidia    |          |  |  |  |
| <b>seq132</b>  | Bacteroidetes         | Bacteroidia    |          |  |  |  |
| <b>seq152</b>  | Bacteroidetes         | Bacteroidia    |          |  |  |  |
| <b>seq178</b>  | Bacteroidetes         | Bacteroidia    |          |  |  |  |
| <b>seq180</b>  | Bacteroidetes         | Bacteroidia    |          |  |  |  |
| <b>seq185</b>  | Bacteroidetes         | Bacteroidia    |          |  |  |  |
| <b>seq192</b>  | Bacteroidetes         | Bacteroidia    |          |  |  |  |

Sequence Count Table

|                | <b>Phylum</b> | <b>Class</b> | <b>Order</b>  | <b>Family</b>   |
|----------------|---------------|--------------|---------------|-----------------|
| <b>seq224</b>  | Bacteroidetes | Bacteroidia  | Bacteroidales | Bacteroidaceae  |
| <b>seq228</b>  | Bacteroidetes | Bacteroidia  | Bacteroidales | Bacteroidaceae  |
| <b>seq250</b>  | Bacteroidetes | Bacteroidia  | Bacteroidales | Bacteroidaceae  |
| <b>seq252</b>  | Bacteroidetes | Bacteroidia  | Bacteroidales | Bacteroidaceae  |
| <b>seq256</b>  | Bacteroidetes | Bacteroidia  | Bacteroidales | Bacteroidaceae  |
| <b>seq335</b>  | Bacteroidetes | Bacteroidia  | Bacteroidales | Bacteroidaceae  |
| <b>seq397</b>  | Bacteroidetes | Bacteroidia  | Bacteroidales | Bacteroidaceae  |
| <b>seq419</b>  | Bacteroidetes | Bacteroidia  | Bacteroidales | Bacteroidaceae  |
| <b>seq433</b>  | Bacteroidetes | Bacteroidia  | Bacteroidales | Bacteroidaceae  |
| <b>seq474</b>  | Bacteroidetes | Bacteroidia  | Bacteroidales | Bacteroidaceae  |
| <b>seq575</b>  | Bacteroidetes | Bacteroidia  | Bacteroidales | Bacteroidaceae  |
| <b>seq601</b>  | Bacteroidetes | Bacteroidia  | Bacteroidales | Bacteroidaceae  |
| <b>seq668</b>  | Bacteroidetes | Bacteroidia  | Bacteroidales | Bacteroidaceae  |
| <b>seq762</b>  | Bacteroidetes | Bacteroidia  | Bacteroidales | Bacteroidaceae  |
| <b>seq843</b>  | Bacteroidetes | Bacteroidia  | Bacteroidales | Bacteroidaceae  |
| <b>seq893</b>  | Bacteroidetes | Bacteroidia  | Bacteroidales | Bacteroidaceae  |
| <b>seq918</b>  | Bacteroidetes | Bacteroidia  | Bacteroidales | Bacteroidaceae  |
| <b>seq1047</b> | Bacteroidetes | Bacteroidia  | Bacteroidales | Bacteroidaceae  |
| <b>seq1187</b> | Bacteroidetes | Bacteroidia  | Bacteroidales | Bacteroidaceae  |
| <b>seq1253</b> | Bacteroidetes | Bacteroidia  | Bacteroidales | Bacteroidaceae  |
| <b>seq1379</b> | Bacteroidetes | Bacteroidia  | Bacteroidales | Bacteroidaceae  |
| <b>seq1420</b> | Bacteroidetes | Bacteroidia  | Bacteroidales | Bacteroidaceae  |
| <b>seq1493</b> | Bacteroidetes | Bacteroidia  | Bacteroidales | Bacteroidaceae  |
|                | Bacteroidetes | Bacteroidia  | Bacteroidales | Bacteroidaceae  |
| <b>seq221</b>  | Bacteroidetes | Bacteroidia  | Bacteroidales | Barnesiellaceae |
| <b>seq247</b>  | Bacteroidetes | Bacteroidia  | Bacteroidales | Barnesiellaceae |
| <b>seq259</b>  | Bacteroidetes | Bacteroidia  | Bacteroidales | Barnesiellaceae |
| <b>seq262</b>  | Bacteroidetes | Bacteroidia  | Bacteroidales | Barnesiellaceae |
| <b>seq284</b>  | Bacteroidetes | Bacteroidia  | Bacteroidales | Barnesiellaceae |
| <b>seq289</b>  | Bacteroidetes | Bacteroidia  | Bacteroidales | Barnesiellaceae |
| <b>seq314</b>  | Bacteroidetes | Bacteroidia  | Bacteroidales | Barnesiellaceae |
| <b>seq359</b>  | Bacteroidetes | Bacteroidia  | Bacteroidales | Barnesiellaceae |

Sequence Count Table

|                | <b>Phylum</b> | <b>Class</b> | <b>Genus</b> | <b>Species</b>   |
|----------------|---------------|--------------|--------------|------------------|
| <b>seq224</b>  | Bacteroidetes | Bacteroidia  | Bacteroides  | ovatus           |
| <b>seq228</b>  | Bacteroidetes | Bacteroidia  | Bacteroides  |                  |
| <b>seq250</b>  | Bacteroidetes | Bacteroidia  | Bacteroides  |                  |
| <b>seq252</b>  | Bacteroidetes | Bacteroidia  | Bacteroides  | intestinalis     |
| <b>seq256</b>  | Bacteroidetes | Bacteroidia  | Bacteroides  | clarus           |
| <b>seq335</b>  | Bacteroidetes | Bacteroidia  | Bacteroides  | salyersiae       |
| <b>seq397</b>  | Bacteroidetes | Bacteroidia  | Bacteroides  | salyersiae       |
| <b>seq419</b>  | Bacteroidetes | Bacteroidia  | Bacteroides  |                  |
| <b>seq433</b>  | Bacteroidetes | Bacteroidia  | Bacteroides  | nordii           |
| <b>seq474</b>  | Bacteroidetes | Bacteroidia  | Bacteroides  |                  |
| <b>seq575</b>  | Bacteroidetes | Bacteroidia  | Bacteroides  |                  |
| <b>seq601</b>  | Bacteroidetes | Bacteroidia  | Bacteroides  |                  |
| <b>seq668</b>  | Bacteroidetes | Bacteroidia  | Bacteroides  |                  |
| <b>seq762</b>  | Bacteroidetes | Bacteroidia  | Bacteroides  |                  |
| <b>seq843</b>  | Bacteroidetes | Bacteroidia  | Bacteroides  |                  |
| <b>seq893</b>  | Bacteroidetes | Bacteroidia  | Bacteroides  |                  |
| <b>seq918</b>  | Bacteroidetes | Bacteroidia  | Bacteroides  | acidifaciens     |
| <b>seq1047</b> | Bacteroidetes | Bacteroidia  | Bacteroides  |                  |
| <b>seq1187</b> | Bacteroidetes | Bacteroidia  | Bacteroides  |                  |
| <b>seq1253</b> | Bacteroidetes | Bacteroidia  | Bacteroides  |                  |
| <b>seq1379</b> | Bacteroidetes | Bacteroidia  | Bacteroides  |                  |
| <b>seq1420</b> | Bacteroidetes | Bacteroidia  | Bacteroides  |                  |
| <b>seq1493</b> | Bacteroidetes | Bacteroidia  | Bacteroides  |                  |
|                | Bacteroidetes | Bacteroidia  | Bacteroides  | <b>TOTAL</b>     |
| <b>seq221</b>  | Bacteroidetes | Bacteroidia  | Barnesiella  |                  |
| <b>seq247</b>  | Bacteroidetes | Bacteroidia  | Barnesiella  | intestinihominis |
| <b>seq259</b>  | Bacteroidetes | Bacteroidia  | Barnesiella  |                  |
| <b>seq262</b>  | Bacteroidetes | Bacteroidia  | Barnesiella  |                  |
| <b>seq284</b>  | Bacteroidetes | Bacteroidia  | Barnesiella  |                  |
| <b>seq289</b>  | Bacteroidetes | Bacteroidia  | Barnesiella  |                  |
| <b>seq314</b>  | Bacteroidetes | Bacteroidia  | Barnesiella  |                  |
| <b>seq359</b>  | Bacteroidetes | Bacteroidia  | Barnesiella  |                  |

Sequence Count Table

|                | <b>Phylum</b> | <b>Class</b> | <b>Subject34WK0</b> | <b>Subject34WK12</b> | <b>Subject16WK0</b> | <b>Subject16WK12</b> |
|----------------|---------------|--------------|---------------------|----------------------|---------------------|----------------------|
| <b>seq224</b>  | Bacteroidetes | Bacteroidia  | 0                   | 0                    | 0                   | 0                    |
| <b>seq228</b>  | Bacteroidetes | Bacteroidia  | 0                   | 0                    | 0                   | 0                    |
| <b>seq250</b>  | Bacteroidetes | Bacteroidia  | 0                   | 0                    | 0                   | 0                    |
| <b>seq252</b>  | Bacteroidetes | Bacteroidia  | 107                 | 948                  | 0                   | 0                    |
| <b>seq256</b>  | Bacteroidetes | Bacteroidia  | 0                   | 0                    | 0                   | 0                    |
| <b>seq335</b>  | Bacteroidetes | Bacteroidia  | 58                  | 286                  | 0                   | 0                    |
| <b>seq397</b>  | Bacteroidetes | Bacteroidia  | 0                   | 0                    | 0                   | 0                    |
| <b>seq419</b>  | Bacteroidetes | Bacteroidia  | 0                   | 0                    | 0                   | 0                    |
| <b>seq433</b>  | Bacteroidetes | Bacteroidia  | 0                   | 0                    | 0                   | 7                    |
| <b>seq474</b>  | Bacteroidetes | Bacteroidia  | 86                  | 769                  | 0                   | 0                    |
| <b>seq575</b>  | Bacteroidetes | Bacteroidia  | 0                   | 0                    | 0                   | 0                    |
| <b>seq601</b>  | Bacteroidetes | Bacteroidia  | 0                   | 0                    | 0                   | 0                    |
| <b>seq668</b>  | Bacteroidetes | Bacteroidia  | 0                   | 0                    | 0                   | 0                    |
| <b>seq762</b>  | Bacteroidetes | Bacteroidia  | 0                   | 0                    | 0                   | 0                    |
| <b>seq843</b>  | Bacteroidetes | Bacteroidia  | 0                   | 0                    | 0                   | 0                    |
| <b>seq893</b>  | Bacteroidetes | Bacteroidia  | 0                   | 0                    | 0                   | 0                    |
| <b>seq918</b>  | Bacteroidetes | Bacteroidia  | 0                   | 0                    | 0                   | 0                    |
| <b>seq1047</b> | Bacteroidetes | Bacteroidia  | 0                   | 0                    | 0                   | 0                    |
| <b>seq1187</b> | Bacteroidetes | Bacteroidia  | 0                   | 0                    | 0                   | 0                    |
| <b>seq1253</b> | Bacteroidetes | Bacteroidia  | 0                   | 0                    | 0                   | 0                    |
| <b>seq1379</b> | Bacteroidetes | Bacteroidia  | 0                   | 0                    | 0                   | 0                    |
| <b>seq1420</b> | Bacteroidetes | Bacteroidia  | 0                   | 0                    | 0                   | 0                    |
| <b>seq1493</b> | Bacteroidetes | Bacteroidia  | 0                   | 0                    | 0                   | 0                    |
|                | Bacteroidetes | Bacteroidia  | <b>2249</b>         | <b>26924</b>         | <b>4220</b>         | <b>3557</b>          |
| <b>seq221</b>  | Bacteroidetes | Bacteroidia  | 189                 | 662                  | 0                   | 0                    |
| <b>seq247</b>  | Bacteroidetes | Bacteroidia  | 0                   | 0                    | 0                   | 0                    |
| <b>seq259</b>  | Bacteroidetes | Bacteroidia  | 0                   | 0                    | 0                   | 0                    |
| <b>seq262</b>  | Bacteroidetes | Bacteroidia  | 0                   | 0                    | 0                   | 0                    |
| <b>seq284</b>  | Bacteroidetes | Bacteroidia  | 0                   | 0                    | 0                   | 0                    |
| <b>seq289</b>  | Bacteroidetes | Bacteroidia  | 0                   | 0                    | 0                   | 0                    |
| <b>seq314</b>  | Bacteroidetes | Bacteroidia  | 0                   | 0                    | 0                   | 0                    |
| <b>seq359</b>  | Bacteroidetes | Bacteroidia  | 0                   | 0                    | 90                  | 105                  |

Sequence Count Table

|                | <b>Phylum</b> | <b>Class</b> | <b>Subject17WK0</b> | <b>Subject17WK12</b> | <b>Subject1WK0</b> | <b>Subject1WK12</b> |
|----------------|---------------|--------------|---------------------|----------------------|--------------------|---------------------|
| <b>seq224</b>  | Bacteroidetes | Bacteroidia  | 0                   | 0                    | 0                  | 0                   |
| <b>seq228</b>  | Bacteroidetes | Bacteroidia  | 0                   | 0                    | 0                  | 0                   |
| <b>seq250</b>  | Bacteroidetes | Bacteroidia  | 1086                | 741                  | 0                  | 0                   |
| <b>seq252</b>  | Bacteroidetes | Bacteroidia  | 0                   | 0                    | 0                  | 0                   |
| <b>seq256</b>  | Bacteroidetes | Bacteroidia  | 0                   | 0                    | 0                  | 0                   |
| <b>seq335</b>  | Bacteroidetes | Bacteroidia  | 0                   | 0                    | 0                  | 0                   |
| <b>seq397</b>  | Bacteroidetes | Bacteroidia  | 0                   | 0                    | 0                  | 0                   |
| <b>seq419</b>  | Bacteroidetes | Bacteroidia  | 0                   | 0                    | 0                  | 0                   |
| <b>seq433</b>  | Bacteroidetes | Bacteroidia  | 0                   | 0                    | 0                  | 0                   |
| <b>seq474</b>  | Bacteroidetes | Bacteroidia  | 0                   | 0                    | 0                  | 0                   |
| <b>seq575</b>  | Bacteroidetes | Bacteroidia  | 0                   | 0                    | 0                  | 0                   |
| <b>seq601</b>  | Bacteroidetes | Bacteroidia  | 0                   | 0                    | 0                  | 0                   |
| <b>seq668</b>  | Bacteroidetes | Bacteroidia  | 0                   | 0                    | 0                  | 0                   |
| <b>seq762</b>  | Bacteroidetes | Bacteroidia  | 0                   | 0                    | 0                  | 0                   |
| <b>seq843</b>  | Bacteroidetes | Bacteroidia  | 0                   | 0                    | 0                  | 0                   |
| <b>seq893</b>  | Bacteroidetes | Bacteroidia  | 0                   | 0                    | 0                  | 0                   |
| <b>seq918</b>  | Bacteroidetes | Bacteroidia  | 0                   | 0                    | 0                  | 0                   |
| <b>seq1047</b> | Bacteroidetes | Bacteroidia  | 0                   | 0                    | 0                  | 0                   |
| <b>seq1187</b> | Bacteroidetes | Bacteroidia  | 0                   | 0                    | 0                  | 0                   |
| <b>seq1253</b> | Bacteroidetes | Bacteroidia  | 0                   | 0                    | 0                  | 0                   |
| <b>seq1379</b> | Bacteroidetes | Bacteroidia  | 0                   | 0                    | 0                  | 0                   |
| <b>seq1420</b> | Bacteroidetes | Bacteroidia  | 0                   | 0                    | 0                  | 0                   |
| <b>seq1493</b> | Bacteroidetes | Bacteroidia  | 0                   | 0                    | 0                  | 0                   |
|                | Bacteroidetes | Bacteroidia  | <b>22118</b>        | <b>28313</b>         | <b>13137</b>       | <b>14562</b>        |
| <b>seq221</b>  | Bacteroidetes | Bacteroidia  | 194                 | 139                  | 0                  | 0                   |
| <b>seq247</b>  | Bacteroidetes | Bacteroidia  | 0                   | 0                    | 0                  | 0                   |
| <b>seq259</b>  | Bacteroidetes | Bacteroidia  | 0                   | 0                    | 0                  | 0                   |
| <b>seq262</b>  | Bacteroidetes | Bacteroidia  | 0                   | 0                    | 0                  | 0                   |
| <b>seq284</b>  | Bacteroidetes | Bacteroidia  | 0                   | 0                    | 0                  | 0                   |
| <b>seq289</b>  | Bacteroidetes | Bacteroidia  | 0                   | 0                    | 0                  | 0                   |
| <b>seq314</b>  | Bacteroidetes | Bacteroidia  | 0                   | 0                    | 0                  | 0                   |
| <b>seq359</b>  | Bacteroidetes | Bacteroidia  | 0                   | 0                    | 0                  | 0                   |

Sequence Count Table

|                | <b>Phylum</b> | <b>Class</b> | <b>Subject2WK0</b> | <b>Subject2WK12</b> | <b>Subject3WK0</b> | <b>Subject3WK12</b> |
|----------------|---------------|--------------|--------------------|---------------------|--------------------|---------------------|
| <b>seq224</b>  | Bacteroidetes | Bacteroidia  | 0                  | 0                   | 0                  | 0                   |
| <b>seq228</b>  | Bacteroidetes | Bacteroidia  | 0                  | 0                   | 0                  | 0                   |
| <b>seq250</b>  | Bacteroidetes | Bacteroidia  | 0                  | 0                   | 0                  | 0                   |
| <b>seq252</b>  | Bacteroidetes | Bacteroidia  | 0                  | 0                   | 0                  | 0                   |
| <b>seq256</b>  | Bacteroidetes | Bacteroidia  | 0                  | 0                   | 0                  | 34                  |
| <b>seq335</b>  | Bacteroidetes | Bacteroidia  | 0                  | 0                   | 0                  | 0                   |
| <b>seq397</b>  | Bacteroidetes | Bacteroidia  | 0                  | 0                   | 0                  | 0                   |
| <b>seq419</b>  | Bacteroidetes | Bacteroidia  | 0                  | 0                   | 765                | 371                 |
| <b>seq433</b>  | Bacteroidetes | Bacteroidia  | 0                  | 0                   | 0                  | 0                   |
| <b>seq474</b>  | Bacteroidetes | Bacteroidia  | 0                  | 0                   | 0                  | 0                   |
| <b>seq575</b>  | Bacteroidetes | Bacteroidia  | 0                  | 0                   | 0                  | 0                   |
| <b>seq601</b>  | Bacteroidetes | Bacteroidia  | 0                  | 0                   | 0                  | 0                   |
| <b>seq668</b>  | Bacteroidetes | Bacteroidia  | 0                  | 434                 | 0                  | 0                   |
| <b>seq762</b>  | Bacteroidetes | Bacteroidia  | 0                  | 0                   | 0                  | 0                   |
| <b>seq843</b>  | Bacteroidetes | Bacteroidia  | 0                  | 0                   | 0                  | 0                   |
| <b>seq893</b>  | Bacteroidetes | Bacteroidia  | 0                  | 0                   | 0                  | 0                   |
| <b>seq918</b>  | Bacteroidetes | Bacteroidia  | 0                  | 0                   | 0                  | 0                   |
| <b>seq1047</b> | Bacteroidetes | Bacteroidia  | 0                  | 0                   | 0                  | 0                   |
| <b>seq1187</b> | Bacteroidetes | Bacteroidia  | 0                  | 0                   | 0                  | 0                   |
| <b>seq1253</b> | Bacteroidetes | Bacteroidia  | 0                  | 0                   | 0                  | 0                   |
| <b>seq1379</b> | Bacteroidetes | Bacteroidia  | 0                  | 0                   | 0                  | 0                   |
| <b>seq1420</b> | Bacteroidetes | Bacteroidia  | 0                  | 0                   | 0                  | 0                   |
| <b>seq1493</b> | Bacteroidetes | Bacteroidia  | 0                  | 0                   | 0                  | 0                   |
|                | Bacteroidetes | Bacteroidia  | <b>27899</b>       | <b>23449</b>        | <b>26016</b>       | <b>38251</b>        |
| <b>seq221</b>  | Bacteroidetes | Bacteroidia  | 0                  | 0                   | 0                  | 0                   |
| <b>seq247</b>  | Bacteroidetes | Bacteroidia  | 0                  | 0                   | 0                  | 0                   |
| <b>seq259</b>  | Bacteroidetes | Bacteroidia  | 0                  | 0                   | 0                  | 0                   |
| <b>seq262</b>  | Bacteroidetes | Bacteroidia  | 0                  | 0                   | 0                  | 0                   |
| <b>seq284</b>  | Bacteroidetes | Bacteroidia  | 0                  | 0                   | 0                  | 0                   |
| <b>seq289</b>  | Bacteroidetes | Bacteroidia  | 0                  | 0                   | 0                  | 0                   |
| <b>seq314</b>  | Bacteroidetes | Bacteroidia  | 0                  | 0                   | 0                  | 0                   |
| <b>seq359</b>  | Bacteroidetes | Bacteroidia  | 0                  | 0                   | 0                  | 0                   |

Sequence Count Table

|         | Phylum        | Class       | Subject4WK0 | Subject4WK12 | Subject5WK0 | Subject5WK12 |
|---------|---------------|-------------|-------------|--------------|-------------|--------------|
| seq224  | Bacteroidetes | Bacteroidia | 0           | 0            | 0           | 0            |
| seq228  | Bacteroidetes | Bacteroidia | 0           | 0            | 0           | 0            |
| seq250  | Bacteroidetes | Bacteroidia | 759         | 500          | 0           | 0            |
| seq252  | Bacteroidetes | Bacteroidia | 0           | 0            | 0           | 0            |
| seq256  | Bacteroidetes | Bacteroidia | 0           | 0            | 0           | 0            |
| seq335  | Bacteroidetes | Bacteroidia | 0           | 0            | 0           | 0            |
| seq397  | Bacteroidetes | Bacteroidia | 0           | 0            | 0           | 0            |
| seq419  | Bacteroidetes | Bacteroidia | 0           | 0            | 0           | 0            |
| seq433  | Bacteroidetes | Bacteroidia | 0           | 0            | 0           | 0            |
| seq474  | Bacteroidetes | Bacteroidia | 0           | 0            | 0           | 0            |
| seq575  | Bacteroidetes | Bacteroidia | 0           | 0            | 0           | 0            |
| seq601  | Bacteroidetes | Bacteroidia | 0           | 0            | 0           | 0            |
| seq668  | Bacteroidetes | Bacteroidia | 0           | 0            | 0           | 0            |
| seq762  | Bacteroidetes | Bacteroidia | 0           | 0            | 0           | 0            |
| seq843  | Bacteroidetes | Bacteroidia | 0           | 0            | 0           | 0            |
| seq893  | Bacteroidetes | Bacteroidia | 0           | 0            | 0           | 0            |
| seq918  | Bacteroidetes | Bacteroidia | 0           | 125          | 0           | 0            |
| seq1047 | Bacteroidetes | Bacteroidia | 0           | 0            | 0           | 0            |
| seq1187 | Bacteroidetes | Bacteroidia | 0           | 0            | 0           | 0            |
| seq1253 | Bacteroidetes | Bacteroidia | 0           | 0            | 0           | 0            |
| seq1379 | Bacteroidetes | Bacteroidia | 0           | 0            | 0           | 0            |
| seq1420 | Bacteroidetes | Bacteroidia | 0           | 0            | 0           | 0            |
| seq1493 | Bacteroidetes | Bacteroidia | 0           | 0            | 0           | 0            |
|         | Bacteroidetes | Bacteroidia | 34395       | 51655        | 37945       | 40068        |
| seq221  | Bacteroidetes | Bacteroidia | 0           | 0            | 0           | 0            |
| seq247  | Bacteroidetes | Bacteroidia | 0           | 0            | 0           | 0            |
| seq259  | Bacteroidetes | Bacteroidia | 0           | 0            | 0           | 0            |
| seq262  | Bacteroidetes | Bacteroidia | 1119        | 1883         | 0           | 0            |
| seq284  | Bacteroidetes | Bacteroidia | 0           | 0            | 1262        | 1254         |
| seq289  | Bacteroidetes | Bacteroidia | 0           | 0            | 0           | 0            |
| seq314  | Bacteroidetes | Bacteroidia | 0           | 0            | 0           | 0            |
| seq359  | Bacteroidetes | Bacteroidia | 0           | 0            | 0           | 0            |



Sequence Count Table

|                | <b>Phylum</b> | <b>Class</b> | <b>Subject6WK0</b> | <b>Subject6WK12</b> | <b>Subject18WK0</b> | <b>Subject18WK12</b> |
|----------------|---------------|--------------|--------------------|---------------------|---------------------|----------------------|
| <b>seq224</b>  | Bacteroidetes | Bacteroidia  | 0                  | 0                   | 0                   | 0                    |
| <b>seq228</b>  | Bacteroidetes | Bacteroidia  | 0                  | 0                   | 0                   | 0                    |
| <b>seq250</b>  | Bacteroidetes | Bacteroidia  | 0                  | 0                   | 0                   | 0                    |
| <b>seq252</b>  | Bacteroidetes | Bacteroidia  | 206                | 211                 | 0                   | 0                    |
| <b>seq256</b>  | Bacteroidetes | Bacteroidia  | 0                  | 0                   | 0                   | 0                    |
| <b>seq335</b>  | Bacteroidetes | Bacteroidia  | 0                  | 0                   | 0                   | 0                    |
| <b>seq397</b>  | Bacteroidetes | Bacteroidia  | 0                  | 0                   | 0                   | 0                    |
| <b>seq419</b>  | Bacteroidetes | Bacteroidia  | 0                  | 0                   | 0                   | 0                    |
| <b>seq433</b>  | Bacteroidetes | Bacteroidia  | 0                  | 0                   | 56                  | 15                   |
| <b>seq474</b>  | Bacteroidetes | Bacteroidia  | 0                  | 0                   | 0                   | 0                    |
| <b>seq575</b>  | Bacteroidetes | Bacteroidia  | 0                  | 0                   | 0                   | 0                    |
| <b>seq601</b>  | Bacteroidetes | Bacteroidia  | 374                | 154                 | 0                   | 0                    |
| <b>seq668</b>  | Bacteroidetes | Bacteroidia  | 0                  | 0                   | 0                   | 0                    |
| <b>seq762</b>  | Bacteroidetes | Bacteroidia  | 0                  | 0                   | 0                   | 0                    |
| <b>seq843</b>  | Bacteroidetes | Bacteroidia  | 0                  | 0                   | 0                   | 0                    |
| <b>seq893</b>  | Bacteroidetes | Bacteroidia  | 80                 | 121                 | 0                   | 0                    |
| <b>seq918</b>  | Bacteroidetes | Bacteroidia  | 0                  | 0                   | 0                   | 0                    |
| <b>seq1047</b> | Bacteroidetes | Bacteroidia  | 0                  | 0                   | 0                   | 0                    |
| <b>seq1187</b> | Bacteroidetes | Bacteroidia  | 0                  | 0                   | 0                   | 0                    |
| <b>seq1253</b> | Bacteroidetes | Bacteroidia  | 0                  | 0                   | 0                   | 0                    |
| <b>seq1379</b> | Bacteroidetes | Bacteroidia  | 0                  | 0                   | 0                   | 0                    |
| <b>seq1420</b> | Bacteroidetes | Bacteroidia  | 0                  | 0                   | 0                   | 0                    |
| <b>seq1493</b> | Bacteroidetes | Bacteroidia  | 0                  | 0                   | 0                   | 0                    |
|                | Bacteroidetes | Bacteroidia  | <b>7794</b>        | <b>11281</b>        | <b>58632</b>        | <b>46615</b>         |
| <b>seq221</b>  | Bacteroidetes | Bacteroidia  | 0                  | 0                   | 0                   | 0                    |
| <b>seq247</b>  | Bacteroidetes | Bacteroidia  | 0                  | 0                   | 0                   | 0                    |
| <b>seq259</b>  | Bacteroidetes | Bacteroidia  | 0                  | 0                   | 0                   | 0                    |
| <b>seq262</b>  | Bacteroidetes | Bacteroidia  | 0                  | 0                   | 0                   | 0                    |
| <b>seq284</b>  | Bacteroidetes | Bacteroidia  | 0                  | 0                   | 0                   | 0                    |
| <b>seq289</b>  | Bacteroidetes | Bacteroidia  | 0                  | 0                   | 0                   | 0                    |
| <b>seq314</b>  | Bacteroidetes | Bacteroidia  | 0                  | 0                   | 0                   | 0                    |
| <b>seq359</b>  | Bacteroidetes | Bacteroidia  | 0                  | 0                   | 0                   | 0                    |

Sequence Count Table

|                | <b>Phylum</b> | <b>Class</b> | <b>Subject19WK0</b> | <b>Subject19WK12</b> | <b>Subject20WK0</b> | <b>Subject20WK12</b> |
|----------------|---------------|--------------|---------------------|----------------------|---------------------|----------------------|
| <b>seq224</b>  | Bacteroidetes | Bacteroidia  | 0                   | 0                    | 0                   | 0                    |
| <b>seq228</b>  | Bacteroidetes | Bacteroidia  | 0                   | 0                    | 0                   | 0                    |
| <b>seq250</b>  | Bacteroidetes | Bacteroidia  | 0                   | 0                    | 0                   | 0                    |
| <b>seq252</b>  | Bacteroidetes | Bacteroidia  | 0                   | 0                    | 0                   | 0                    |
| <b>seq256</b>  | Bacteroidetes | Bacteroidia  | 0                   | 0                    | 0                   | 0                    |
| <b>seq335</b>  | Bacteroidetes | Bacteroidia  | 0                   | 0                    | 0                   | 0                    |
| <b>seq397</b>  | Bacteroidetes | Bacteroidia  | 0                   | 0                    | 0                   | 0                    |
| <b>seq419</b>  | Bacteroidetes | Bacteroidia  | 0                   | 0                    | 0                   | 0                    |
| <b>seq433</b>  | Bacteroidetes | Bacteroidia  | 0                   | 0                    | 0                   | 0                    |
| <b>seq474</b>  | Bacteroidetes | Bacteroidia  | 0                   | 0                    | 0                   | 0                    |
| <b>seq575</b>  | Bacteroidetes | Bacteroidia  | 0                   | 0                    | 0                   | 0                    |
| <b>seq601</b>  | Bacteroidetes | Bacteroidia  | 0                   | 0                    | 0                   | 0                    |
| <b>seq668</b>  | Bacteroidetes | Bacteroidia  | 0                   | 0                    | 0                   | 0                    |
| <b>seq762</b>  | Bacteroidetes | Bacteroidia  | 0                   | 0                    | 0                   | 0                    |
| <b>seq843</b>  | Bacteroidetes | Bacteroidia  | 0                   | 0                    | 0                   | 0                    |
| <b>seq893</b>  | Bacteroidetes | Bacteroidia  | 0                   | 0                    | 0                   | 0                    |
| <b>seq918</b>  | Bacteroidetes | Bacteroidia  | 0                   | 0                    | 0                   | 0                    |
| <b>seq1047</b> | Bacteroidetes | Bacteroidia  | 0                   | 0                    | 0                   | 0                    |
| <b>seq1187</b> | Bacteroidetes | Bacteroidia  | 0                   | 0                    | 0                   | 0                    |
| <b>seq1253</b> | Bacteroidetes | Bacteroidia  | 0                   | 0                    | 0                   | 0                    |
| <b>seq1379</b> | Bacteroidetes | Bacteroidia  | 0                   | 0                    | 0                   | 0                    |
| <b>seq1420</b> | Bacteroidetes | Bacteroidia  | 0                   | 0                    | 0                   | 0                    |
| <b>seq1493</b> | Bacteroidetes | Bacteroidia  | 0                   | 0                    | 0                   | 0                    |
|                | Bacteroidetes | Bacteroidia  | <b>44290</b>        | <b>55267</b>         | <b>1449</b>         | <b>3157</b>          |
| <b>seq221</b>  | Bacteroidetes | Bacteroidia  | 0                   | 0                    | 0                   | 0                    |
| <b>seq247</b>  | Bacteroidetes | Bacteroidia  | 0                   | 0                    | 0                   | 0                    |
| <b>seq259</b>  | Bacteroidetes | Bacteroidia  | 0                   | 0                    | 0                   | 0                    |
| <b>seq262</b>  | Bacteroidetes | Bacteroidia  | 0                   | 0                    | 0                   | 0                    |
| <b>seq284</b>  | Bacteroidetes | Bacteroidia  | 0                   | 0                    | 0                   | 0                    |
| <b>seq289</b>  | Bacteroidetes | Bacteroidia  | 0                   | 0                    | 0                   | 0                    |
| <b>seq314</b>  | Bacteroidetes | Bacteroidia  | 0                   | 0                    | 0                   | 0                    |
| <b>seq359</b>  | Bacteroidetes | Bacteroidia  | 0                   | 0                    | 0                   | 0                    |

Sequence Count Table

|         | Phylum        | Class       | Subject7WK0 | Subject7WK12 | Subject21WK0 | Subject21WK12 |
|---------|---------------|-------------|-------------|--------------|--------------|---------------|
| seq224  | Bacteroidetes | Bacteroidia | 0           | 0            | 974          | 1351          |
| seq228  | Bacteroidetes | Bacteroidia | 0           | 0            | 1442         | 2528          |
| seq250  | Bacteroidetes | Bacteroidia | 0           | 0            | 0            | 0             |
| seq252  | Bacteroidetes | Bacteroidia | 0           | 90           | 0            | 0             |
| seq256  | Bacteroidetes | Bacteroidia | 0           | 0            | 0            | 0             |
| seq335  | Bacteroidetes | Bacteroidia | 0           | 0            | 0            | 0             |
| seq397  | Bacteroidetes | Bacteroidia | 0           | 0            | 0            | 0             |
| seq419  | Bacteroidetes | Bacteroidia | 0           | 0            | 0            | 0             |
| seq433  | Bacteroidetes | Bacteroidia | 66          | 282          | 0            | 0             |
| seq474  | Bacteroidetes | Bacteroidia | 0           | 0            | 0            | 0             |
| seq575  | Bacteroidetes | Bacteroidia | 0           | 0            | 0            | 0             |
| seq601  | Bacteroidetes | Bacteroidia | 0           | 0            | 0            | 0             |
| seq668  | Bacteroidetes | Bacteroidia | 0           | 0            | 0            | 0             |
| seq762  | Bacteroidetes | Bacteroidia | 0           | 0            | 0            | 0             |
| seq843  | Bacteroidetes | Bacteroidia | 0           | 0            | 0            | 0             |
| seq893  | Bacteroidetes | Bacteroidia | 0           | 0            | 0            | 0             |
| seq918  | Bacteroidetes | Bacteroidia | 0           | 0            | 0            | 0             |
| seq1047 | Bacteroidetes | Bacteroidia | 0           | 0            | 0            | 0             |
| seq1187 | Bacteroidetes | Bacteroidia | 0           | 0            | 0            | 0             |
| seq1253 | Bacteroidetes | Bacteroidia | 0           | 0            | 0            | 0             |
| seq1379 | Bacteroidetes | Bacteroidia | 0           | 0            | 0            | 0             |
| seq1420 | Bacteroidetes | Bacteroidia | 0           | 0            | 0            | 0             |
| seq1493 | Bacteroidetes | Bacteroidia | 0           | 0            | 0            | 29            |
|         | Bacteroidetes | Bacteroidia | 23818       | 45510        | 25389        | 49724         |
| seq221  | Bacteroidetes | Bacteroidia | 0           | 0            | 0            | 0             |
| seq247  | Bacteroidetes | Bacteroidia | 0           | 0            | 0            | 0             |
| seq259  | Bacteroidetes | Bacteroidia | 0           | 0            | 0            | 0             |
| seq262  | Bacteroidetes | Bacteroidia | 0           | 0            | 0            | 0             |
| seq284  | Bacteroidetes | Bacteroidia | 0           | 0            | 0            | 0             |
| seq289  | Bacteroidetes | Bacteroidia | 0           | 0            | 0            | 0             |
| seq314  | Bacteroidetes | Bacteroidia | 0           | 0            | 0            | 0             |
| seq359  | Bacteroidetes | Bacteroidia | 0           | 0            | 0            | 0             |

Sequence Count Table

|                | <b>Phylum</b> | <b>Class</b> | <b>Subject8WK0</b> | <b>Subject8WK12</b> | <b>Subject9WK0</b> | <b>Subject9WK12</b> |
|----------------|---------------|--------------|--------------------|---------------------|--------------------|---------------------|
| <b>seq224</b>  | Bacteroidetes | Bacteroidia  | 348                | 174                 | 0                  | 0                   |
| <b>seq228</b>  | Bacteroidetes | Bacteroidia  | 0                  | 0                   | 0                  | 0                   |
| <b>seq250</b>  | Bacteroidetes | Bacteroidia  | 0                  | 0                   | 0                  | 0                   |
| <b>seq252</b>  | Bacteroidetes | Bacteroidia  | 0                  | 0                   | 0                  | 0                   |
| <b>seq256</b>  | Bacteroidetes | Bacteroidia  | 1571               | 1524                | 0                  | 0                   |
| <b>seq335</b>  | Bacteroidetes | Bacteroidia  | 0                  | 0                   | 0                  | 0                   |
| <b>seq397</b>  | Bacteroidetes | Bacteroidia  | 0                  | 0                   | 0                  | 0                   |
| <b>seq419</b>  | Bacteroidetes | Bacteroidia  | 0                  | 0                   | 0                  | 0                   |
| <b>seq433</b>  | Bacteroidetes | Bacteroidia  | 0                  | 0                   | 64                 | 0                   |
| <b>seq474</b>  | Bacteroidetes | Bacteroidia  | 0                  | 0                   | 0                  | 0                   |
| <b>seq575</b>  | Bacteroidetes | Bacteroidia  | 0                  | 0                   | 0                  | 0                   |
| <b>seq601</b>  | Bacteroidetes | Bacteroidia  | 0                  | 0                   | 0                  | 0                   |
| <b>seq668</b>  | Bacteroidetes | Bacteroidia  | 0                  | 0                   | 0                  | 0                   |
| <b>seq762</b>  | Bacteroidetes | Bacteroidia  | 0                  | 0                   | 0                  | 0                   |
| <b>seq843</b>  | Bacteroidetes | Bacteroidia  | 0                  | 0                   | 0                  | 0                   |
| <b>seq893</b>  | Bacteroidetes | Bacteroidia  | 0                  | 0                   | 0                  | 0                   |
| <b>seq918</b>  | Bacteroidetes | Bacteroidia  | 0                  | 0                   | 0                  | 0                   |
| <b>seq1047</b> | Bacteroidetes | Bacteroidia  | 0                  | 0                   | 0                  | 0                   |
| <b>seq1187</b> | Bacteroidetes | Bacteroidia  | 0                  | 0                   | 0                  | 0                   |
| <b>seq1253</b> | Bacteroidetes | Bacteroidia  | 0                  | 0                   | 0                  | 0                   |
| <b>seq1379</b> | Bacteroidetes | Bacteroidia  | 0                  | 0                   | 0                  | 44                  |
| <b>seq1420</b> | Bacteroidetes | Bacteroidia  | 0                  | 0                   | 0                  | 0                   |
| <b>seq1493</b> | Bacteroidetes | Bacteroidia  | 0                  | 0                   | 0                  | 0                   |
|                | Bacteroidetes | Bacteroidia  | <b>32363</b>       | <b>38186</b>        | <b>22537</b>       | <b>50235</b>        |
| <b>seq221</b>  | Bacteroidetes | Bacteroidia  | 0                  | 0                   | 0                  | 0                   |
| <b>seq247</b>  | Bacteroidetes | Bacteroidia  | 0                  | 0                   | 0                  | 0                   |
| <b>seq259</b>  | Bacteroidetes | Bacteroidia  | 0                  | 0                   | 0                  | 0                   |
| <b>seq262</b>  | Bacteroidetes | Bacteroidia  | 0                  | 0                   | 0                  | 0                   |
| <b>seq284</b>  | Bacteroidetes | Bacteroidia  | 0                  | 0                   | 0                  | 0                   |
| <b>seq289</b>  | Bacteroidetes | Bacteroidia  | 0                  | 0                   | 0                  | 0                   |
| <b>seq314</b>  | Bacteroidetes | Bacteroidia  | 0                  | 0                   | 0                  | 0                   |
| <b>seq359</b>  | Bacteroidetes | Bacteroidia  | 0                  | 0                   | 0                  | 0                   |

Sequence Count Table

|                | <b>Phylum</b> | <b>Class</b> | <b>Subject10WK0</b> | <b>Subject10WK12</b> | <b>Subject22WK0</b> | <b>Subject22WK12</b> |
|----------------|---------------|--------------|---------------------|----------------------|---------------------|----------------------|
| <b>seq224</b>  | Bacteroidetes | Bacteroidia  | 0                   | 0                    | 0                   | 0                    |
| <b>seq228</b>  | Bacteroidetes | Bacteroidia  | 0                   | 0                    | 0                   | 0                    |
| <b>seq250</b>  | Bacteroidetes | Bacteroidia  | 0                   | 0                    | 0                   | 0                    |
| <b>seq252</b>  | Bacteroidetes | Bacteroidia  | 0                   | 0                    | 237                 | 501                  |
| <b>seq256</b>  | Bacteroidetes | Bacteroidia  | 0                   | 0                    | 0                   | 0                    |
| <b>seq335</b>  | Bacteroidetes | Bacteroidia  | 0                   | 0                    | 33                  | 52                   |
| <b>seq397</b>  | Bacteroidetes | Bacteroidia  | 0                   | 0                    | 0                   | 0                    |
| <b>seq419</b>  | Bacteroidetes | Bacteroidia  | 0                   | 0                    | 0                   | 0                    |
| <b>seq433</b>  | Bacteroidetes | Bacteroidia  | 0                   | 0                    | 0                   | 0                    |
| <b>seq474</b>  | Bacteroidetes | Bacteroidia  | 0                   | 0                    | 0                   | 0                    |
| <b>seq575</b>  | Bacteroidetes | Bacteroidia  | 0                   | 0                    | 0                   | 0                    |
| <b>seq601</b>  | Bacteroidetes | Bacteroidia  | 0                   | 0                    | 0                   | 0                    |
| <b>seq668</b>  | Bacteroidetes | Bacteroidia  | 0                   | 0                    | 0                   | 0                    |
| <b>seq762</b>  | Bacteroidetes | Bacteroidia  | 0                   | 0                    | 0                   | 0                    |
| <b>seq843</b>  | Bacteroidetes | Bacteroidia  | 0                   | 0                    | 0                   | 0                    |
| <b>seq893</b>  | Bacteroidetes | Bacteroidia  | 0                   | 0                    | 0                   | 0                    |
| <b>seq918</b>  | Bacteroidetes | Bacteroidia  | 0                   | 0                    | 0                   | 0                    |
| <b>seq1047</b> | Bacteroidetes | Bacteroidia  | 0                   | 0                    | 0                   | 0                    |
| <b>seq1187</b> | Bacteroidetes | Bacteroidia  | 0                   | 0                    | 0                   | 0                    |
| <b>seq1253</b> | Bacteroidetes | Bacteroidia  | 0                   | 0                    | 27                  | 40                   |
| <b>seq1379</b> | Bacteroidetes | Bacteroidia  | 0                   | 0                    | 0                   | 0                    |
| <b>seq1420</b> | Bacteroidetes | Bacteroidia  | 0                   | 0                    | 0                   | 0                    |
| <b>seq1493</b> | Bacteroidetes | Bacteroidia  | 0                   | 0                    | 0                   | 0                    |
|                | Bacteroidetes | Bacteroidia  | 21265               | 13441                | 4464                | 4315                 |
| <b>seq221</b>  | Bacteroidetes | Bacteroidia  | 0                   | 0                    | 11                  | 62                   |
| <b>seq247</b>  | Bacteroidetes | Bacteroidia  | 0                   | 0                    | 0                   | 0                    |
| <b>seq259</b>  | Bacteroidetes | Bacteroidia  | 0                   | 0                    | 0                   | 0                    |
| <b>seq262</b>  | Bacteroidetes | Bacteroidia  | 0                   | 0                    | 0                   | 0                    |
| <b>seq284</b>  | Bacteroidetes | Bacteroidia  | 0                   | 0                    | 0                   | 0                    |
| <b>seq289</b>  | Bacteroidetes | Bacteroidia  | 0                   | 0                    | 0                   | 0                    |
| <b>seq314</b>  | Bacteroidetes | Bacteroidia  | 0                   | 0                    | 0                   | 0                    |
| <b>seq359</b>  | Bacteroidetes | Bacteroidia  | 0                   | 0                    | 0                   | 0                    |

Sequence Count Table

|                | <b>Phylum</b> | <b>Class</b> | <b>Subject23WK0</b> | <b>Subject23WK12</b> | <b>Subject24WK0</b> | <b>Subject24WK12</b> |
|----------------|---------------|--------------|---------------------|----------------------|---------------------|----------------------|
| <b>seq224</b>  | Bacteroidetes | Bacteroidia  | 0                   | 0                    | 26                  | 19                   |
| <b>seq228</b>  | Bacteroidetes | Bacteroidia  | 0                   | 0                    | 0                   | 0                    |
| <b>seq250</b>  | Bacteroidetes | Bacteroidia  | 0                   | 0                    | 0                   | 0                    |
| <b>seq252</b>  | Bacteroidetes | Bacteroidia  | 0                   | 0                    | 0                   | 0                    |
| <b>seq256</b>  | Bacteroidetes | Bacteroidia  | 0                   | 0                    | 0                   | 0                    |
| <b>seq335</b>  | Bacteroidetes | Bacteroidia  | 373                 | 333                  | 128                 | 432                  |
| <b>seq397</b>  | Bacteroidetes | Bacteroidia  | 0                   | 0                    | 0                   | 0                    |
| <b>seq419</b>  | Bacteroidetes | Bacteroidia  | 0                   | 0                    | 0                   | 0                    |
| <b>seq433</b>  | Bacteroidetes | Bacteroidia  | 0                   | 0                    | 0                   | 0                    |
| <b>seq474</b>  | Bacteroidetes | Bacteroidia  | 0                   | 0                    | 0                   | 0                    |
| <b>seq575</b>  | Bacteroidetes | Bacteroidia  | 0                   | 0                    | 0                   | 0                    |
| <b>seq601</b>  | Bacteroidetes | Bacteroidia  | 0                   | 0                    | 0                   | 0                    |
| <b>seq668</b>  | Bacteroidetes | Bacteroidia  | 0                   | 0                    | 0                   | 0                    |
| <b>seq762</b>  | Bacteroidetes | Bacteroidia  | 0                   | 0                    | 0                   | 0                    |
| <b>seq843</b>  | Bacteroidetes | Bacteroidia  | 0                   | 0                    | 0                   | 0                    |
| <b>seq893</b>  | Bacteroidetes | Bacteroidia  | 0                   | 0                    | 0                   | 0                    |
| <b>seq918</b>  | Bacteroidetes | Bacteroidia  | 0                   | 0                    | 0                   | 0                    |
| <b>seq1047</b> | Bacteroidetes | Bacteroidia  | 0                   | 0                    | 0                   | 0                    |
| <b>seq1187</b> | Bacteroidetes | Bacteroidia  | 0                   | 0                    | 0                   | 0                    |
| <b>seq1253</b> | Bacteroidetes | Bacteroidia  | 0                   | 0                    | 0                   | 0                    |
| <b>seq1379</b> | Bacteroidetes | Bacteroidia  | 0                   | 0                    | 0                   | 0                    |
| <b>seq1420</b> | Bacteroidetes | Bacteroidia  | 0                   | 0                    | 0                   | 0                    |
| <b>seq1493</b> | Bacteroidetes | Bacteroidia  | 0                   | 0                    | 0                   | 0                    |
|                | Bacteroidetes | Bacteroidia  | <b>8228</b>         | <b>12286</b>         | <b>16793</b>        | <b>31738</b>         |
| <b>seq221</b>  | Bacteroidetes | Bacteroidia  | 0                   | 0                    | 499                 | 1702                 |
| <b>seq247</b>  | Bacteroidetes | Bacteroidia  | 0                   | 0                    | 0                   | 0                    |
| <b>seq259</b>  | Bacteroidetes | Bacteroidia  | 0                   | 0                    | 0                   | 0                    |
| <b>seq262</b>  | Bacteroidetes | Bacteroidia  | 0                   | 0                    | 0                   | 0                    |
| <b>seq284</b>  | Bacteroidetes | Bacteroidia  | 0                   | 0                    | 0                   | 0                    |
| <b>seq289</b>  | Bacteroidetes | Bacteroidia  | 1083                | 1373                 | 0                   | 0                    |
| <b>seq314</b>  | Bacteroidetes | Bacteroidia  | 282                 | 366                  | 0                   | 0                    |
| <b>seq359</b>  | Bacteroidetes | Bacteroidia  | 0                   | 0                    | 0                   | 0                    |

Sequence Count Table

|                | <b>Phylum</b> | <b>Class</b> | <b>Subject11WK0</b> | <b>Subject11WK12</b> | <b>Subject12WK0</b> | <b>Subject12WK12</b> |
|----------------|---------------|--------------|---------------------|----------------------|---------------------|----------------------|
| <b>seq224</b>  | Bacteroidetes | Bacteroidia  | 0                   | 0                    | 0                   | 0                    |
| <b>seq228</b>  | Bacteroidetes | Bacteroidia  | 0                   | 0                    | 0                   | 0                    |
| <b>seq250</b>  | Bacteroidetes | Bacteroidia  | 0                   | 0                    | 13                  | 161                  |
| <b>seq252</b>  | Bacteroidetes | Bacteroidia  | 0                   | 0                    | 0                   | 0                    |
| <b>seq256</b>  | Bacteroidetes | Bacteroidia  | 0                   | 0                    | 0                   | 0                    |
| <b>seq335</b>  | Bacteroidetes | Bacteroidia  | 0                   | 0                    | 0                   | 0                    |
| <b>seq397</b>  | Bacteroidetes | Bacteroidia  | 0                   | 0                    | 0                   | 0                    |
| <b>seq419</b>  | Bacteroidetes | Bacteroidia  | 0                   | 0                    | 0                   | 0                    |
| <b>seq433</b>  | Bacteroidetes | Bacteroidia  | 0                   | 0                    | 0                   | 0                    |
| <b>seq474</b>  | Bacteroidetes | Bacteroidia  | 0                   | 0                    | 0                   | 0                    |
| <b>seq575</b>  | Bacteroidetes | Bacteroidia  | 0                   | 0                    | 136                 | 455                  |
| <b>seq601</b>  | Bacteroidetes | Bacteroidia  | 0                   | 0                    | 0                   | 0                    |
| <b>seq668</b>  | Bacteroidetes | Bacteroidia  | 0                   | 0                    | 0                   | 0                    |
| <b>seq762</b>  | Bacteroidetes | Bacteroidia  | 0                   | 0                    | 0                   | 0                    |
| <b>seq843</b>  | Bacteroidetes | Bacteroidia  | 0                   | 0                    | 0                   | 0                    |
| <b>seq893</b>  | Bacteroidetes | Bacteroidia  | 0                   | 0                    | 0                   | 0                    |
| <b>seq918</b>  | Bacteroidetes | Bacteroidia  | 0                   | 0                    | 0                   | 0                    |
| <b>seq1047</b> | Bacteroidetes | Bacteroidia  | 0                   | 0                    | 0                   | 0                    |
| <b>seq1187</b> | Bacteroidetes | Bacteroidia  | 0                   | 0                    | 0                   | 0                    |
| <b>seq1253</b> | Bacteroidetes | Bacteroidia  | 0                   | 0                    | 0                   | 0                    |
| <b>seq1379</b> | Bacteroidetes | Bacteroidia  | 0                   | 0                    | 0                   | 0                    |
| <b>seq1420</b> | Bacteroidetes | Bacteroidia  | 0                   | 0                    | 0                   | 39                   |
| <b>seq1493</b> | Bacteroidetes | Bacteroidia  | 0                   | 0                    | 0                   | 0                    |
|                | Bacteroidetes | Bacteroidia  | <b>25331</b>        | <b>44951</b>         | <b>18263</b>        | <b>36072</b>         |
| <b>seq221</b>  | Bacteroidetes | Bacteroidia  | 0                   | 0                    | 0                   | 0                    |
| <b>seq247</b>  | Bacteroidetes | Bacteroidia  | 0                   | 0                    | 0                   | 0                    |
| <b>seq259</b>  | Bacteroidetes | Bacteroidia  | 0                   | 0                    | 0                   | 0                    |
| <b>seq262</b>  | Bacteroidetes | Bacteroidia  | 0                   | 0                    | 0                   | 0                    |
| <b>seq284</b>  | Bacteroidetes | Bacteroidia  | 0                   | 0                    | 0                   | 0                    |
| <b>seq289</b>  | Bacteroidetes | Bacteroidia  | 0                   | 0                    | 0                   | 0                    |
| <b>seq314</b>  | Bacteroidetes | Bacteroidia  | 0                   | 0                    | 631                 | 755                  |
| <b>seq359</b>  | Bacteroidetes | Bacteroidia  | 0                   | 0                    | 0                   | 0                    |

Sequence Count Table

|                | <b>Phylum</b> | <b>Class</b> | <b>Subject25WK0</b> | <b>Subject25WK12</b> | <b>Subject38WK0</b> | <b>Subject38WK12</b> |
|----------------|---------------|--------------|---------------------|----------------------|---------------------|----------------------|
| <b>seq224</b>  | Bacteroidetes | Bacteroidia  | 0                   | 0                    | 0                   | 0                    |
| <b>seq228</b>  | Bacteroidetes | Bacteroidia  | 0                   | 0                    | 0                   | 0                    |
| <b>seq250</b>  | Bacteroidetes | Bacteroidia  | 0                   | 0                    | 0                   | 0                    |
| <b>seq252</b>  | Bacteroidetes | Bacteroidia  | 0                   | 0                    | 0                   | 0                    |
| <b>seq256</b>  | Bacteroidetes | Bacteroidia  | 0                   | 0                    | 0                   | 0                    |
| <b>seq335</b>  | Bacteroidetes | Bacteroidia  | 0                   | 0                    | 0                   | 0                    |
| <b>seq397</b>  | Bacteroidetes | Bacteroidia  | 0                   | 0                    | 0                   | 0                    |
| <b>seq419</b>  | Bacteroidetes | Bacteroidia  | 0                   | 0                    | 0                   | 0                    |
| <b>seq433</b>  | Bacteroidetes | Bacteroidia  | 0                   | 0                    | 0                   | 0                    |
| <b>seq474</b>  | Bacteroidetes | Bacteroidia  | 0                   | 0                    | 0                   | 0                    |
| <b>seq575</b>  | Bacteroidetes | Bacteroidia  | 0                   | 0                    | 0                   | 0                    |
| <b>seq601</b>  | Bacteroidetes | Bacteroidia  | 0                   | 0                    | 0                   | 0                    |
| <b>seq668</b>  | Bacteroidetes | Bacteroidia  | 0                   | 0                    | 0                   | 0                    |
| <b>seq762</b>  | Bacteroidetes | Bacteroidia  | 0                   | 0                    | 0                   | 0                    |
| <b>seq843</b>  | Bacteroidetes | Bacteroidia  | 0                   | 0                    | 0                   | 0                    |
| <b>seq893</b>  | Bacteroidetes | Bacteroidia  | 0                   | 0                    | 0                   | 0                    |
| <b>seq918</b>  | Bacteroidetes | Bacteroidia  | 0                   | 0                    | 0                   | 0                    |
| <b>seq1047</b> | Bacteroidetes | Bacteroidia  | 0                   | 0                    | 0                   | 0                    |
| <b>seq1187</b> | Bacteroidetes | Bacteroidia  | 0                   | 0                    | 0                   | 0                    |
| <b>seq1253</b> | Bacteroidetes | Bacteroidia  | 0                   | 0                    | 0                   | 0                    |
| <b>seq1379</b> | Bacteroidetes | Bacteroidia  | 0                   | 0                    | 0                   | 0                    |
| <b>seq1420</b> | Bacteroidetes | Bacteroidia  | 0                   | 0                    | 0                   | 0                    |
| <b>seq1493</b> | Bacteroidetes | Bacteroidia  | 0                   | 0                    | 0                   | 0                    |
|                | Bacteroidetes | Bacteroidia  | 15008               | 10339                | 65                  | 32                   |
| <b>seq221</b>  | Bacteroidetes | Bacteroidia  | 0                   | 0                    | 0                   | 0                    |
| <b>seq247</b>  | Bacteroidetes | Bacteroidia  | 0                   | 0                    | 0                   | 0                    |
| <b>seq259</b>  | Bacteroidetes | Bacteroidia  | 0                   | 0                    | 0                   | 0                    |
| <b>seq262</b>  | Bacteroidetes | Bacteroidia  | 0                   | 0                    | 0                   | 0                    |
| <b>seq284</b>  | Bacteroidetes | Bacteroidia  | 0                   | 0                    | 0                   | 0                    |
| <b>seq289</b>  | Bacteroidetes | Bacteroidia  | 0                   | 0                    | 0                   | 0                    |
| <b>seq314</b>  | Bacteroidetes | Bacteroidia  | 0                   | 0                    | 0                   | 0                    |
| <b>seq359</b>  | Bacteroidetes | Bacteroidia  | 0                   | 0                    | 0                   | 0                    |



Sequence Count Table

|                | <b>Phylum</b> | <b>Class</b> | <b>Subject31WK0</b> | <b>Subject31WK12</b> | <b>Subject32WK0</b> | <b>Subject32WK12</b> |
|----------------|---------------|--------------|---------------------|----------------------|---------------------|----------------------|
| <b>seq224</b>  | Bacteroidetes | Bacteroidia  | 0                   | 0                    | 0                   | 0                    |
| <b>seq228</b>  | Bacteroidetes | Bacteroidia  | 0                   | 0                    | 0                   | 0                    |
| <b>seq250</b>  | Bacteroidetes | Bacteroidia  | 0                   | 0                    | 0                   | 0                    |
| <b>seq252</b>  | Bacteroidetes | Bacteroidia  | 0                   | 0                    | 0                   | 0                    |
| <b>seq256</b>  | Bacteroidetes | Bacteroidia  | 0                   | 0                    | 0                   | 0                    |
| <b>seq335</b>  | Bacteroidetes | Bacteroidia  | 0                   | 0                    | 0                   | 0                    |
| <b>seq397</b>  | Bacteroidetes | Bacteroidia  | 0                   | 0                    | 0                   | 0                    |
| <b>seq419</b>  | Bacteroidetes | Bacteroidia  | 0                   | 0                    | 0                   | 0                    |
| <b>seq433</b>  | Bacteroidetes | Bacteroidia  | 0                   | 0                    | 0                   | 0                    |
| <b>seq474</b>  | Bacteroidetes | Bacteroidia  | 0                   | 0                    | 0                   | 0                    |
| <b>seq575</b>  | Bacteroidetes | Bacteroidia  | 0                   | 0                    | 0                   | 0                    |
| <b>seq601</b>  | Bacteroidetes | Bacteroidia  | 0                   | 0                    | 0                   | 0                    |
| <b>seq668</b>  | Bacteroidetes | Bacteroidia  | 0                   | 0                    | 0                   | 0                    |
| <b>seq762</b>  | Bacteroidetes | Bacteroidia  | 0                   | 0                    | 0                   | 0                    |
| <b>seq843</b>  | Bacteroidetes | Bacteroidia  | 0                   | 0                    | 0                   | 0                    |
| <b>seq893</b>  | Bacteroidetes | Bacteroidia  | 0                   | 0                    | 0                   | 0                    |
| <b>seq918</b>  | Bacteroidetes | Bacteroidia  | 0                   | 0                    | 0                   | 0                    |
| <b>seq1047</b> | Bacteroidetes | Bacteroidia  | 0                   | 0                    | 0                   | 0                    |
| <b>seq1187</b> | Bacteroidetes | Bacteroidia  | 0                   | 0                    | 0                   | 0                    |
| <b>seq1253</b> | Bacteroidetes | Bacteroidia  | 0                   | 0                    | 0                   | 0                    |
| <b>seq1379</b> | Bacteroidetes | Bacteroidia  | 0                   | 0                    | 0                   | 0                    |
| <b>seq1420</b> | Bacteroidetes | Bacteroidia  | 0                   | 0                    | 0                   | 0                    |
| <b>seq1493</b> | Bacteroidetes | Bacteroidia  | 0                   | 0                    | 0                   | 0                    |
|                | Bacteroidetes | Bacteroidia  | <b>169</b>          | <b>0</b>             | <b>18568</b>        | <b>129</b>           |
| <b>seq221</b>  | Bacteroidetes | Bacteroidia  | 0                   | 0                    | 0                   | 0                    |
| <b>seq247</b>  | Bacteroidetes | Bacteroidia  | 0                   | 0                    | 0                   | 0                    |
| <b>seq259</b>  | Bacteroidetes | Bacteroidia  | 0                   | 0                    | 0                   | 0                    |
| <b>seq262</b>  | Bacteroidetes | Bacteroidia  | 0                   | 0                    | 0                   | 0                    |
| <b>seq284</b>  | Bacteroidetes | Bacteroidia  | 0                   | 0                    | 0                   | 0                    |
| <b>seq289</b>  | Bacteroidetes | Bacteroidia  | 0                   | 0                    | 0                   | 0                    |
| <b>seq314</b>  | Bacteroidetes | Bacteroidia  | 0                   | 0                    | 0                   | 0                    |
| <b>seq359</b>  | Bacteroidetes | Bacteroidia  | 0                   | 0                    | 0                   | 0                    |

Sequence Count Table

|                | <b>Phylum</b> | <b>Class</b> | <b>Subject13WK0</b> | <b>Subject13WK12</b> | <b>Subject39WK0</b> | <b>Subject39WK12</b> |
|----------------|---------------|--------------|---------------------|----------------------|---------------------|----------------------|
| <b>seq224</b>  | Bacteroidetes | Bacteroidia  | 95                  | 40                   | 0                   | 668                  |
| <b>seq228</b>  | Bacteroidetes | Bacteroidia  | 0                   | 0                    | 0                   | 0                    |
| <b>seq250</b>  | Bacteroidetes | Bacteroidia  | 0                   | 0                    | 0                   | 0                    |
| <b>seq252</b>  | Bacteroidetes | Bacteroidia  | 0                   | 0                    | 0                   | 0                    |
| <b>seq256</b>  | Bacteroidetes | Bacteroidia  | 0                   | 0                    | 0                   | 0                    |
| <b>seq335</b>  | Bacteroidetes | Bacteroidia  | 0                   | 0                    | 0                   | 0                    |
| <b>seq397</b>  | Bacteroidetes | Bacteroidia  | 645                 | 611                  | 0                   | 0                    |
| <b>seq419</b>  | Bacteroidetes | Bacteroidia  | 0                   | 0                    | 0                   | 0                    |
| <b>seq433</b>  | Bacteroidetes | Bacteroidia  | 0                   | 0                    | 0                   | 0                    |
| <b>seq474</b>  | Bacteroidetes | Bacteroidia  | 0                   | 0                    | 0                   | 0                    |
| <b>seq575</b>  | Bacteroidetes | Bacteroidia  | 0                   | 0                    | 0                   | 0                    |
| <b>seq601</b>  | Bacteroidetes | Bacteroidia  | 0                   | 0                    | 0                   | 0                    |
| <b>seq668</b>  | Bacteroidetes | Bacteroidia  | 0                   | 0                    | 0                   | 0                    |
| <b>seq762</b>  | Bacteroidetes | Bacteroidia  | 0                   | 0                    | 0                   | 0                    |
| <b>seq843</b>  | Bacteroidetes | Bacteroidia  | 95                  | 135                  | 0                   | 0                    |
| <b>seq893</b>  | Bacteroidetes | Bacteroidia  | 0                   | 0                    | 0                   | 0                    |
| <b>seq918</b>  | Bacteroidetes | Bacteroidia  | 0                   | 0                    | 0                   | 0                    |
| <b>seq1047</b> | Bacteroidetes | Bacteroidia  | 126                 | 0                    | 0                   | 0                    |
| <b>seq1187</b> | Bacteroidetes | Bacteroidia  | 0                   | 0                    | 0                   | 0                    |
| <b>seq1253</b> | Bacteroidetes | Bacteroidia  | 0                   | 0                    | 0                   | 0                    |
| <b>seq1379</b> | Bacteroidetes | Bacteroidia  | 0                   | 0                    | 0                   | 0                    |
| <b>seq1420</b> | Bacteroidetes | Bacteroidia  | 0                   | 0                    | 0                   | 0                    |
| <b>seq1493</b> | Bacteroidetes | Bacteroidia  | 0                   | 0                    | 0                   | 0                    |
|                | Bacteroidetes | Bacteroidia  | <b>21676</b>        | <b>10968</b>         | <b>10</b>           | <b>21885</b>         |
| <b>seq221</b>  | Bacteroidetes | Bacteroidia  | 332                 | 412                  | 0                   | 0                    |
| <b>seq247</b>  | Bacteroidetes | Bacteroidia  | 1098                | 1213                 | 0                   | 262                  |
| <b>seq259</b>  | Bacteroidetes | Bacteroidia  | 0                   | 0                    | 0                   | 0                    |
| <b>seq262</b>  | Bacteroidetes | Bacteroidia  | 0                   | 0                    | 0                   | 0                    |
| <b>seq284</b>  | Bacteroidetes | Bacteroidia  | 0                   | 0                    | 0                   | 0                    |
| <b>seq289</b>  | Bacteroidetes | Bacteroidia  | 0                   | 0                    | 0                   | 0                    |
| <b>seq314</b>  | Bacteroidetes | Bacteroidia  | 0                   | 0                    | 0                   | 0                    |
| <b>seq359</b>  | Bacteroidetes | Bacteroidia  | 0                   | 0                    | 0                   | 0                    |

Sequence Count Table

|                | <b>Phylum</b> | <b>Class</b> | <b>Subject26WK0</b> | <b>Subject26WK12</b> | <b>Subject14WK0</b> | <b>Subject14WK12</b> |
|----------------|---------------|--------------|---------------------|----------------------|---------------------|----------------------|
| <b>seq224</b>  | Bacteroidetes | Bacteroidia  | 0                   | 0                    | 329                 | 66                   |
| <b>seq228</b>  | Bacteroidetes | Bacteroidia  | 0                   | 0                    | 0                   | 0                    |
| <b>seq250</b>  | Bacteroidetes | Bacteroidia  | 0                   | 0                    | 0                   | 0                    |
| <b>seq252</b>  | Bacteroidetes | Bacteroidia  | 760                 | 137                  | 0                   | 0                    |
| <b>seq256</b>  | Bacteroidetes | Bacteroidia  | 0                   | 0                    | 0                   | 0                    |
| <b>seq335</b>  | Bacteroidetes | Bacteroidia  | 0                   | 0                    | 0                   | 68                   |
| <b>seq397</b>  | Bacteroidetes | Bacteroidia  | 0                   | 0                    | 0                   | 0                    |
| <b>seq419</b>  | Bacteroidetes | Bacteroidia  | 0                   | 0                    | 0                   | 0                    |
| <b>seq433</b>  | Bacteroidetes | Bacteroidia  | 308                 | 285                  | 0                   | 0                    |
| <b>seq474</b>  | Bacteroidetes | Bacteroidia  | 0                   | 0                    | 0                   | 0                    |
| <b>seq575</b>  | Bacteroidetes | Bacteroidia  | 0                   | 0                    | 0                   | 0                    |
| <b>seq601</b>  | Bacteroidetes | Bacteroidia  | 0                   | 0                    | 0                   | 0                    |
| <b>seq668</b>  | Bacteroidetes | Bacteroidia  | 0                   | 0                    | 0                   | 0                    |
| <b>seq762</b>  | Bacteroidetes | Bacteroidia  | 0                   | 0                    | 0                   | 0                    |
| <b>seq843</b>  | Bacteroidetes | Bacteroidia  | 0                   | 0                    | 0                   | 0                    |
| <b>seq893</b>  | Bacteroidetes | Bacteroidia  | 0                   | 0                    | 0                   | 0                    |
| <b>seq918</b>  | Bacteroidetes | Bacteroidia  | 0                   | 0                    | 0                   | 0                    |
| <b>seq1047</b> | Bacteroidetes | Bacteroidia  | 0                   | 0                    | 0                   | 0                    |
| <b>seq1187</b> | Bacteroidetes | Bacteroidia  | 0                   | 85                   | 0                   | 0                    |
| <b>seq1253</b> | Bacteroidetes | Bacteroidia  | 0                   | 0                    | 0                   | 0                    |
| <b>seq1379</b> | Bacteroidetes | Bacteroidia  | 0                   | 0                    | 0                   | 0                    |
| <b>seq1420</b> | Bacteroidetes | Bacteroidia  | 0                   | 0                    | 0                   | 0                    |
| <b>seq1493</b> | Bacteroidetes | Bacteroidia  | 0                   | 0                    | 0                   | 0                    |
|                | Bacteroidetes | Bacteroidia  | <b>21832</b>        | <b>38377</b>         | <b>21091</b>        | <b>12750</b>         |
| <b>seq221</b>  | Bacteroidetes | Bacteroidia  | 0                   | 0                    | 0                   | 0                    |
| <b>seq247</b>  | Bacteroidetes | Bacteroidia  | 0                   | 0                    | 368                 | 480                  |
| <b>seq259</b>  | Bacteroidetes | Bacteroidia  | 0                   | 0                    | 1168                | 1918                 |
| <b>seq262</b>  | Bacteroidetes | Bacteroidia  | 0                   | 0                    | 0                   | 0                    |
| <b>seq284</b>  | Bacteroidetes | Bacteroidia  | 0                   | 0                    | 0                   | 0                    |
| <b>seq289</b>  | Bacteroidetes | Bacteroidia  | 0                   | 0                    | 0                   | 0                    |
| <b>seq314</b>  | Bacteroidetes | Bacteroidia  | 0                   | 0                    | 0                   | 0                    |
| <b>seq359</b>  | Bacteroidetes | Bacteroidia  | 0                   | 0                    | 0                   | 0                    |

Sequence Count Table

|                | <b>Phylum</b> | <b>Class</b> | <b>Subject27WK0</b> | <b>Subject27WK12</b> | <b>Subject15WK0</b> | <b>Subject15WK12</b> |
|----------------|---------------|--------------|---------------------|----------------------|---------------------|----------------------|
| <b>seq224</b>  | Bacteroidetes | Bacteroidia  | 0                   | 0                    | 0                   | 0                    |
| <b>seq228</b>  | Bacteroidetes | Bacteroidia  | 0                   | 0                    | 0                   | 0                    |
| <b>seq250</b>  | Bacteroidetes | Bacteroidia  | 0                   | 0                    | 0                   | 0                    |
| <b>seq252</b>  | Bacteroidetes | Bacteroidia  | 0                   | 0                    | 0                   | 0                    |
| <b>seq256</b>  | Bacteroidetes | Bacteroidia  | 0                   | 0                    | 0                   | 0                    |
| <b>seq335</b>  | Bacteroidetes | Bacteroidia  | 0                   | 0                    | 0                   | 0                    |
| <b>seq397</b>  | Bacteroidetes | Bacteroidia  | 0                   | 0                    | 0                   | 0                    |
| <b>seq419</b>  | Bacteroidetes | Bacteroidia  | 0                   | 0                    | 0                   | 0                    |
| <b>seq433</b>  | Bacteroidetes | Bacteroidia  | 0                   | 0                    | 0                   | 0                    |
| <b>seq474</b>  | Bacteroidetes | Bacteroidia  | 0                   | 0                    | 0                   | 0                    |
| <b>seq575</b>  | Bacteroidetes | Bacteroidia  | 0                   | 0                    | 0                   | 0                    |
| <b>seq601</b>  | Bacteroidetes | Bacteroidia  | 0                   | 0                    | 0                   | 0                    |
| <b>seq668</b>  | Bacteroidetes | Bacteroidia  | 0                   | 0                    | 0                   | 0                    |
| <b>seq762</b>  | Bacteroidetes | Bacteroidia  | 175                 | 128                  | 0                   | 0                    |
| <b>seq843</b>  | Bacteroidetes | Bacteroidia  | 0                   | 0                    | 0                   | 0                    |
| <b>seq893</b>  | Bacteroidetes | Bacteroidia  | 0                   | 0                    | 0                   | 0                    |
| <b>seq918</b>  | Bacteroidetes | Bacteroidia  | 60                  | 0                    | 0                   | 0                    |
| <b>seq1047</b> | Bacteroidetes | Bacteroidia  | 0                   | 0                    | 0                   | 0                    |
| <b>seq1187</b> | Bacteroidetes | Bacteroidia  | 0                   | 0                    | 0                   | 0                    |
| <b>seq1253</b> | Bacteroidetes | Bacteroidia  | 0                   | 0                    | 0                   | 0                    |
| <b>seq1379</b> | Bacteroidetes | Bacteroidia  | 0                   | 0                    | 0                   | 0                    |
| <b>seq1420</b> | Bacteroidetes | Bacteroidia  | 0                   | 0                    | 0                   | 0                    |
| <b>seq1493</b> | Bacteroidetes | Bacteroidia  | 0                   | 0                    | 0                   | 0                    |
|                | Bacteroidetes | Bacteroidia  | 19516               | 16953                | 25154               | 25554                |
| <b>seq221</b>  | Bacteroidetes | Bacteroidia  | 0                   | 0                    | 0                   | 0                    |
| <b>seq247</b>  | Bacteroidetes | Bacteroidia  | 0                   | 0                    | 0                   | 0                    |
| <b>seq259</b>  | Bacteroidetes | Bacteroidia  | 0                   | 0                    | 0                   | 0                    |
| <b>seq262</b>  | Bacteroidetes | Bacteroidia  | 0                   | 0                    | 0                   | 0                    |
| <b>seq284</b>  | Bacteroidetes | Bacteroidia  | 0                   | 0                    | 0                   | 0                    |
| <b>seq289</b>  | Bacteroidetes | Bacteroidia  | 0                   | 0                    | 0                   | 0                    |
| <b>seq314</b>  | Bacteroidetes | Bacteroidia  | 0                   | 0                    | 0                   | 0                    |
| <b>seq359</b>  | Bacteroidetes | Bacteroidia  | 0                   | 0                    | 688                 | 645                  |

Sequence Count Table

|                | <b>Phylum</b> | <b>Class</b> | <b>Δ</b> |  |  |  |
|----------------|---------------|--------------|----------|--|--|--|
| <b>seq224</b>  | Bacteroidetes | Bacteroidia  |          |  |  |  |
| <b>seq228</b>  | Bacteroidetes | Bacteroidia  |          |  |  |  |
| <b>seq250</b>  | Bacteroidetes | Bacteroidia  |          |  |  |  |
| <b>seq252</b>  | Bacteroidetes | Bacteroidia  |          |  |  |  |
| <b>seq256</b>  | Bacteroidetes | Bacteroidia  |          |  |  |  |
| <b>seq335</b>  | Bacteroidetes | Bacteroidia  |          |  |  |  |
| <b>seq397</b>  | Bacteroidetes | Bacteroidia  |          |  |  |  |
| <b>seq419</b>  | Bacteroidetes | Bacteroidia  |          |  |  |  |
| <b>seq433</b>  | Bacteroidetes | Bacteroidia  |          |  |  |  |
| <b>seq474</b>  | Bacteroidetes | Bacteroidia  |          |  |  |  |
| <b>seq575</b>  | Bacteroidetes | Bacteroidia  |          |  |  |  |
| <b>seq601</b>  | Bacteroidetes | Bacteroidia  |          |  |  |  |
| <b>seq668</b>  | Bacteroidetes | Bacteroidia  |          |  |  |  |
| <b>seq762</b>  | Bacteroidetes | Bacteroidia  |          |  |  |  |
| <b>seq843</b>  | Bacteroidetes | Bacteroidia  |          |  |  |  |
| <b>seq893</b>  | Bacteroidetes | Bacteroidia  |          |  |  |  |
| <b>seq918</b>  | Bacteroidetes | Bacteroidia  |          |  |  |  |
| <b>seq1047</b> | Bacteroidetes | Bacteroidia  |          |  |  |  |
| <b>seq1187</b> | Bacteroidetes | Bacteroidia  |          |  |  |  |
| <b>seq1253</b> | Bacteroidetes | Bacteroidia  |          |  |  |  |
| <b>seq1379</b> | Bacteroidetes | Bacteroidia  |          |  |  |  |
| <b>seq1420</b> | Bacteroidetes | Bacteroidia  |          |  |  |  |
| <b>seq1493</b> | Bacteroidetes | Bacteroidia  |          |  |  |  |
|                | Bacteroidetes | Bacteroidia  |          |  |  |  |
| <b>seq221</b>  | Bacteroidetes | Bacteroidia  |          |  |  |  |
| <b>seq247</b>  | Bacteroidetes | Bacteroidia  |          |  |  |  |
| <b>seq259</b>  | Bacteroidetes | Bacteroidia  |          |  |  |  |
| <b>seq262</b>  | Bacteroidetes | Bacteroidia  |          |  |  |  |
| <b>seq284</b>  | Bacteroidetes | Bacteroidia  |          |  |  |  |
| <b>seq289</b>  | Bacteroidetes | Bacteroidia  |          |  |  |  |
| <b>seq314</b>  | Bacteroidetes | Bacteroidia  |          |  |  |  |
| <b>seq359</b>  | Bacteroidetes | Bacteroidia  |          |  |  |  |

Sequence Count Table

|                | <b>Phylum</b> | <b>Class</b> | <b>Order</b>  | <b>Family</b>   |
|----------------|---------------|--------------|---------------|-----------------|
| <b>seq437</b>  | Bacteroidetes | Bacteroidia  | Bacteroidales | Barnesiellaceae |
| <b>seq332</b>  | Bacteroidetes | Bacteroidia  | Bacteroidales | Barnesiellaceae |
| <b>seq717</b>  | Bacteroidetes | Bacteroidia  | Bacteroidales | Barnesiellaceae |
| <b>seq888</b>  | Bacteroidetes | Bacteroidia  | Bacteroidales | Barnesiellaceae |
| <b>seq702</b>  | Bacteroidetes | Bacteroidia  | Bacteroidales | Barnesiellaceae |
| <b>seq413</b>  | Bacteroidetes | Bacteroidia  | Bacteroidales | Marinifilaceae  |
| <b>seq453</b>  | Bacteroidetes | Bacteroidia  | Bacteroidales | Marinifilaceae  |
| <b>seq538</b>  | Bacteroidetes | Bacteroidia  | Bacteroidales | Marinifilaceae  |
| <b>seq541</b>  | Bacteroidetes | Bacteroidia  | Bacteroidales | Marinifilaceae  |
| <b>seq583</b>  | Bacteroidetes | Bacteroidia  | Bacteroidales | Marinifilaceae  |
| <b>seq641</b>  | Bacteroidetes | Bacteroidia  | Bacteroidales | Marinifilaceae  |
| <b>seq673</b>  | Bacteroidetes | Bacteroidia  | Bacteroidales | Marinifilaceae  |
| <b>seq703</b>  | Bacteroidetes | Bacteroidia  | Bacteroidales | Marinifilaceae  |
| <b>seq722</b>  | Bacteroidetes | Bacteroidia  | Bacteroidales | Marinifilaceae  |
| <b>seq850</b>  | Bacteroidetes | Bacteroidia  | Bacteroidales | Marinifilaceae  |
| <b>seq1201</b> | Bacteroidetes | Bacteroidia  | Bacteroidales | Marinifilaceae  |
| <b>seq1207</b> | Bacteroidetes | Bacteroidia  | Bacteroidales | Marinifilaceae  |
| <b>seq1242</b> | Bacteroidetes | Bacteroidia  | Bacteroidales | Marinifilaceae  |
| <b>seq1566</b> | Bacteroidetes | Bacteroidia  | Bacteroidales | Marinifilaceae  |
| <b>seq135</b>  | Bacteroidetes | Bacteroidia  | Bacteroidales | Marinifilaceae  |
| <b>seq370</b>  | Bacteroidetes | Bacteroidia  | Bacteroidales | Marinifilaceae  |
| <b>seq488</b>  | Bacteroidetes | Bacteroidia  | Bacteroidales | Marinifilaceae  |
| <b>seq499</b>  | Bacteroidetes | Bacteroidia  | Bacteroidales | Marinifilaceae  |
| <b>seq751</b>  | Bacteroidetes | Bacteroidia  | Bacteroidales | Marinifilaceae  |
| <b>seq761</b>  | Bacteroidetes | Bacteroidia  | Bacteroidales | Marinifilaceae  |
| <b>seq1069</b> | Bacteroidetes | Bacteroidia  | Bacteroidales | Marinifilaceae  |
| <b>seq1153</b> | Bacteroidetes | Bacteroidia  | Bacteroidales | Marinifilaceae  |
| <b>seq1410</b> | Bacteroidetes | Bacteroidia  | Bacteroidales | Marinifilaceae  |
| <b>seq1680</b> | Bacteroidetes | Bacteroidia  | Bacteroidales | Marinifilaceae  |
| <b>seq1039</b> | Bacteroidetes | Bacteroidia  | Bacteroidales | Marinifilaceae  |
| <b>seq254</b>  | Bacteroidetes | Bacteroidia  | Bacteroidales | Muribaculaceae  |
| <b>seq766</b>  | Bacteroidetes | Bacteroidia  | Bacteroidales | Muribaculaceae  |

Sequence Count Table

|                | <b>Phylum</b> | <b>Class</b> | <b>Genus</b>      | <b>Species</b> |
|----------------|---------------|--------------|-------------------|----------------|
| <b>seq437</b>  | Bacteroidetes | Bacteroidia  | Barnesiella       |                |
| <b>seq332</b>  | Bacteroidetes | Bacteroidia  | Coprobacter       | fastidiosus    |
| <b>seq717</b>  | Bacteroidetes | Bacteroidia  | Coprobacter       | secundus       |
| <b>seq888</b>  | Bacteroidetes | Bacteroidia  | Coprobacter       |                |
| <b>seq702</b>  | Bacteroidetes | Bacteroidia  |                   |                |
| <b>seq413</b>  | Bacteroidetes | Bacteroidia  | Butyricimonas     | faecihominis   |
| <b>seq453</b>  | Bacteroidetes | Bacteroidia  | Butyricimonas     | paravirosa     |
| <b>seq538</b>  | Bacteroidetes | Bacteroidia  | Butyricimonas     | virosa         |
| <b>seq541</b>  | Bacteroidetes | Bacteroidia  | Butyricimonas     |                |
| <b>seq583</b>  | Bacteroidetes | Bacteroidia  | Butyricimonas     |                |
| <b>seq641</b>  | Bacteroidetes | Bacteroidia  | Butyricimonas     | virosa         |
| <b>seq673</b>  | Bacteroidetes | Bacteroidia  | Butyricimonas     |                |
| <b>seq703</b>  | Bacteroidetes | Bacteroidia  | Butyricimonas     |                |
| <b>seq722</b>  | Bacteroidetes | Bacteroidia  | Butyricimonas     |                |
| <b>seq850</b>  | Bacteroidetes | Bacteroidia  | Butyricimonas     |                |
| <b>seq1201</b> | Bacteroidetes | Bacteroidia  | Butyricimonas     |                |
| <b>seq1207</b> | Bacteroidetes | Bacteroidia  | Butyricimonas     |                |
| <b>seq1242</b> | Bacteroidetes | Bacteroidia  | Butyricimonas     |                |
| <b>seq1566</b> | Bacteroidetes | Bacteroidia  | Butyricimonas     | synergistica   |
| <b>seq135</b>  | Bacteroidetes | Bacteroidia  | Odoribacter       | splanchnicus   |
| <b>seq370</b>  | Bacteroidetes | Bacteroidia  | Odoribacter       |                |
| <b>seq488</b>  | Bacteroidetes | Bacteroidia  | Odoribacter       | splanchnicus   |
| <b>seq499</b>  | Bacteroidetes | Bacteroidia  | Odoribacter       | laneus         |
| <b>seq751</b>  | Bacteroidetes | Bacteroidia  | Odoribacter       |                |
| <b>seq761</b>  | Bacteroidetes | Bacteroidia  | Odoribacter       |                |
| <b>seq1069</b> | Bacteroidetes | Bacteroidia  | Odoribacter       |                |
| <b>seq1153</b> | Bacteroidetes | Bacteroidia  | Odoribacter       |                |
| <b>seq1410</b> | Bacteroidetes | Bacteroidia  | Odoribacter       |                |
| <b>seq1680</b> | Bacteroidetes | Bacteroidia  | Odoribacter       |                |
| <b>seq1039</b> | Bacteroidetes | Bacteroidia  | Sanguibacteroides | justesenii     |
| <b>seq254</b>  | Bacteroidetes | Bacteroidia  |                   |                |
| <b>seq766</b>  | Bacteroidetes | Bacteroidia  |                   |                |

Sequence Count Table

|                | <b>Phylum</b> | <b>Class</b> | <b>Subject34WK0</b> | <b>Subject34WK12</b> | <b>Subject16WK0</b> | <b>Subject16WK12</b> |
|----------------|---------------|--------------|---------------------|----------------------|---------------------|----------------------|
| <b>seq437</b>  | Bacteroidetes | Bacteroidia  | 0                   | 0                    | 0                   | 0                    |
| <b>seq332</b>  | Bacteroidetes | Bacteroidia  | 0                   | 0                    | 12                  | 22                   |
| <b>seq717</b>  | Bacteroidetes | Bacteroidia  | 0                   | 0                    | 0                   | 0                    |
| <b>seq888</b>  | Bacteroidetes | Bacteroidia  | 0                   | 0                    | 0                   | 0                    |
| <b>seq702</b>  | Bacteroidetes | Bacteroidia  | 0                   | 0                    | 0                   | 0                    |
| <b>seq413</b>  | Bacteroidetes | Bacteroidia  | 44                  | 65                   | 25                  | 67                   |
| <b>seq453</b>  | Bacteroidetes | Bacteroidia  | 64                  | 149                  | 0                   | 0                    |
| <b>seq538</b>  | Bacteroidetes | Bacteroidia  | 112                 | 333                  | 0                   | 0                    |
| <b>seq541</b>  | Bacteroidetes | Bacteroidia  | 0                   | 0                    | 0                   | 0                    |
| <b>seq583</b>  | Bacteroidetes | Bacteroidia  | 0                   | 0                    | 0                   | 0                    |
| <b>seq641</b>  | Bacteroidetes | Bacteroidia  | 0                   | 0                    | 80                  | 399                  |
| <b>seq673</b>  | Bacteroidetes | Bacteroidia  | 45                  | 128                  | 0                   | 0                    |
| <b>seq703</b>  | Bacteroidetes | Bacteroidia  | 0                   | 0                    | 0                   | 0                    |
| <b>seq722</b>  | Bacteroidetes | Bacteroidia  | 0                   | 0                    | 0                   | 0                    |
| <b>seq850</b>  | Bacteroidetes | Bacteroidia  | 0                   | 0                    | 0                   | 0                    |
| <b>seq1201</b> | Bacteroidetes | Bacteroidia  | 0                   | 0                    | 0                   | 0                    |
| <b>seq1207</b> | Bacteroidetes | Bacteroidia  | 0                   | 0                    | 0                   | 0                    |
| <b>seq1242</b> | Bacteroidetes | Bacteroidia  | 0                   | 0                    | 0                   | 0                    |
| <b>seq1566</b> | Bacteroidetes | Bacteroidia  | 0                   | 0                    | 0                   | 0                    |
| <b>seq135</b>  | Bacteroidetes | Bacteroidia  | 27                  | 313                  | 65                  | 140                  |
| <b>seq370</b>  | Bacteroidetes | Bacteroidia  | 10                  | 0                    | 0                   | 0                    |
| <b>seq488</b>  | Bacteroidetes | Bacteroidia  | 0                   | 0                    | 0                   | 0                    |
| <b>seq499</b>  | Bacteroidetes | Bacteroidia  | 12                  | 764                  | 0                   | 0                    |
| <b>seq751</b>  | Bacteroidetes | Bacteroidia  | 0                   | 0                    | 0                   | 0                    |
| <b>seq761</b>  | Bacteroidetes | Bacteroidia  | 0                   | 0                    | 0                   | 0                    |
| <b>seq1069</b> | Bacteroidetes | Bacteroidia  | 0                   | 0                    | 0                   | 0                    |
| <b>seq1153</b> | Bacteroidetes | Bacteroidia  | 0                   | 0                    | 0                   | 0                    |
| <b>seq1410</b> | Bacteroidetes | Bacteroidia  | 0                   | 0                    | 0                   | 0                    |
| <b>seq1680</b> | Bacteroidetes | Bacteroidia  | 0                   | 0                    | 0                   | 0                    |
| <b>seq1039</b> | Bacteroidetes | Bacteroidia  | 17                  | 32                   | 0                   | 0                    |
| <b>seq254</b>  | Bacteroidetes | Bacteroidia  | 0                   | 0                    | 0                   | 0                    |
| <b>seq766</b>  | Bacteroidetes | Bacteroidia  | 0                   | 0                    | 0                   | 0                    |



Sequence Count Table

|                | <b>Phylum</b> | <b>Class</b> | <b>Subject17WK0</b> | <b>Subject17WK12</b> | <b>Subject1WK0</b> | <b>Subject1WK12</b> |
|----------------|---------------|--------------|---------------------|----------------------|--------------------|---------------------|
| <b>seq437</b>  | Bacteroidetes | Bacteroidia  | 0                   | 0                    | 0                  | 0                   |
| <b>seq332</b>  | Bacteroidetes | Bacteroidia  | 0                   | 0                    | 0                  | 0                   |
| <b>seq717</b>  | Bacteroidetes | Bacteroidia  | 0                   | 0                    | 0                  | 0                   |
| <b>seq888</b>  | Bacteroidetes | Bacteroidia  | 0                   | 0                    | 0                  | 0                   |
| <b>seq702</b>  | Bacteroidetes | Bacteroidia  | 0                   | 0                    | 0                  | 0                   |
| <b>seq413</b>  | Bacteroidetes | Bacteroidia  | 0                   | 0                    | 0                  | 0                   |
| <b>seq453</b>  | Bacteroidetes | Bacteroidia  | 0                   | 0                    | 0                  | 0                   |
| <b>seq538</b>  | Bacteroidetes | Bacteroidia  | 0                   | 0                    | 0                  | 0                   |
| <b>seq541</b>  | Bacteroidetes | Bacteroidia  | 0                   | 0                    | 0                  | 0                   |
| <b>seq583</b>  | Bacteroidetes | Bacteroidia  | 0                   | 0                    | 0                  | 0                   |
| <b>seq641</b>  | Bacteroidetes | Bacteroidia  | 0                   | 0                    | 0                  | 0                   |
| <b>seq673</b>  | Bacteroidetes | Bacteroidia  | 0                   | 0                    | 0                  | 0                   |
| <b>seq703</b>  | Bacteroidetes | Bacteroidia  | 0                   | 0                    | 0                  | 0                   |
| <b>seq722</b>  | Bacteroidetes | Bacteroidia  | 273                 | 75                   | 0                  | 0                   |
| <b>seq850</b>  | Bacteroidetes | Bacteroidia  | 0                   | 0                    | 0                  | 0                   |
| <b>seq1201</b> | Bacteroidetes | Bacteroidia  | 79                  | 0                    | 0                  | 0                   |
| <b>seq1207</b> | Bacteroidetes | Bacteroidia  | 0                   | 0                    | 0                  | 0                   |
| <b>seq1242</b> | Bacteroidetes | Bacteroidia  | 0                   | 0                    | 0                  | 0                   |
| <b>seq1566</b> | Bacteroidetes | Bacteroidia  | 0                   | 0                    | 0                  | 0                   |
| <b>seq135</b>  | Bacteroidetes | Bacteroidia  | 0                   | 128                  | 0                  | 0                   |
| <b>seq370</b>  | Bacteroidetes | Bacteroidia  | 0                   | 0                    | 608                | 827                 |
| <b>seq488</b>  | Bacteroidetes | Bacteroidia  | 0                   | 167                  | 0                  | 0                   |
| <b>seq499</b>  | Bacteroidetes | Bacteroidia  | 0                   | 0                    | 0                  | 0                   |
| <b>seq751</b>  | Bacteroidetes | Bacteroidia  | 0                   | 0                    | 0                  | 0                   |
| <b>seq761</b>  | Bacteroidetes | Bacteroidia  | 0                   | 0                    | 0                  | 0                   |
| <b>seq1069</b> | Bacteroidetes | Bacteroidia  | 0                   | 0                    | 0                  | 0                   |
| <b>seq1153</b> | Bacteroidetes | Bacteroidia  | 0                   | 0                    | 0                  | 0                   |
| <b>seq1410</b> | Bacteroidetes | Bacteroidia  | 0                   | 0                    | 0                  | 0                   |
| <b>seq1680</b> | Bacteroidetes | Bacteroidia  | 0                   | 0                    | 0                  | 0                   |
| <b>seq1039</b> | Bacteroidetes | Bacteroidia  | 0                   | 79                   | 0                  | 0                   |
| <b>seq254</b>  | Bacteroidetes | Bacteroidia  | 0                   | 0                    | 0                  | 0                   |
| <b>seq766</b>  | Bacteroidetes | Bacteroidia  | 0                   | 0                    | 0                  | 0                   |

Sequence Count Table

|                | <b>Phylum</b> | <b>Class</b> | <b>Subject2WK0</b> | <b>Subject2WK12</b> | <b>Subject3WK0</b> | <b>Subject3WK12</b> |
|----------------|---------------|--------------|--------------------|---------------------|--------------------|---------------------|
| <b>seq437</b>  | Bacteroidetes | Bacteroidia  | 0                  | 0                   | 0                  | 0                   |
| <b>seq332</b>  | Bacteroidetes | Bacteroidia  | 0                  | 0                   | 311                | 366                 |
| <b>seq717</b>  | Bacteroidetes | Bacteroidia  | 0                  | 0                   | 0                  | 0                   |
| <b>seq888</b>  | Bacteroidetes | Bacteroidia  | 0                  | 0                   | 0                  | 0                   |
| <b>seq702</b>  | Bacteroidetes | Bacteroidia  | 0                  | 0                   | 38                 | 37                  |
| <b>seq413</b>  | Bacteroidetes | Bacteroidia  | 0                  | 0                   | 0                  | 0                   |
| <b>seq453</b>  | Bacteroidetes | Bacteroidia  | 0                  | 0                   | 0                  | 0                   |
| <b>seq538</b>  | Bacteroidetes | Bacteroidia  | 0                  | 0                   | 0                  | 0                   |
| <b>seq541</b>  | Bacteroidetes | Bacteroidia  | 0                  | 0                   | 0                  | 0                   |
| <b>seq583</b>  | Bacteroidetes | Bacteroidia  | 0                  | 0                   | 0                  | 0                   |
| <b>seq641</b>  | Bacteroidetes | Bacteroidia  | 0                  | 0                   | 0                  | 0                   |
| <b>seq673</b>  | Bacteroidetes | Bacteroidia  | 0                  | 0                   | 0                  | 0                   |
| <b>seq703</b>  | Bacteroidetes | Bacteroidia  | 0                  | 0                   | 0                  | 0                   |
| <b>seq722</b>  | Bacteroidetes | Bacteroidia  | 0                  | 0                   | 0                  | 0                   |
| <b>seq850</b>  | Bacteroidetes | Bacteroidia  | 0                  | 0                   | 0                  | 0                   |
| <b>seq1201</b> | Bacteroidetes | Bacteroidia  | 0                  | 0                   | 0                  | 0                   |
| <b>seq1207</b> | Bacteroidetes | Bacteroidia  | 0                  | 0                   | 0                  | 0                   |
| <b>seq1242</b> | Bacteroidetes | Bacteroidia  | 0                  | 0                   | 0                  | 0                   |
| <b>seq1566</b> | Bacteroidetes | Bacteroidia  | 0                  | 0                   | 0                  | 0                   |
| <b>seq135</b>  | Bacteroidetes | Bacteroidia  | 0                  | 0                   | 0                  | 0                   |
| <b>seq370</b>  | Bacteroidetes | Bacteroidia  | 0                  | 0                   | 0                  | 0                   |
| <b>seq488</b>  | Bacteroidetes | Bacteroidia  | 0                  | 0                   | 0                  | 0                   |
| <b>seq499</b>  | Bacteroidetes | Bacteroidia  | 0                  | 0                   | 0                  | 0                   |
| <b>seq751</b>  | Bacteroidetes | Bacteroidia  | 0                  | 0                   | 0                  | 0                   |
| <b>seq761</b>  | Bacteroidetes | Bacteroidia  | 0                  | 0                   | 0                  | 0                   |
| <b>seq1069</b> | Bacteroidetes | Bacteroidia  | 0                  | 0                   | 0                  | 0                   |
| <b>seq1153</b> | Bacteroidetes | Bacteroidia  | 0                  | 0                   | 0                  | 0                   |
| <b>seq1410</b> | Bacteroidetes | Bacteroidia  | 0                  | 0                   | 0                  | 0                   |
| <b>seq1680</b> | Bacteroidetes | Bacteroidia  | 0                  | 0                   | 0                  | 0                   |
| <b>seq1039</b> | Bacteroidetes | Bacteroidia  | 0                  | 0                   | 0                  | 0                   |
| <b>seq254</b>  | Bacteroidetes | Bacteroidia  | 0                  | 0                   | 0                  | 0                   |
| <b>seq766</b>  | Bacteroidetes | Bacteroidia  | 0                  | 0                   | 0                  | 0                   |

Sequence Count Table

|                | <b>Phylum</b> | <b>Class</b> | <b>Subject4WK0</b> | <b>Subject4WK12</b> | <b>Subject5WK0</b> | <b>Subject5WK12</b> |
|----------------|---------------|--------------|--------------------|---------------------|--------------------|---------------------|
| <b>seq437</b>  | Bacteroidetes | Bacteroidia  | 0                  | 0                   | 0                  | 0                   |
| <b>seq332</b>  | Bacteroidetes | Bacteroidia  | 169                | 192                 | 0                  | 0                   |
| <b>seq717</b>  | Bacteroidetes | Bacteroidia  | 0                  | 0                   | 0                  | 0                   |
| <b>seq888</b>  | Bacteroidetes | Bacteroidia  | 0                  | 0                   | 0                  | 0                   |
| <b>seq702</b>  | Bacteroidetes | Bacteroidia  | 0                  | 0                   | 0                  | 0                   |
| <b>seq413</b>  | Bacteroidetes | Bacteroidia  | 0                  | 0                   | 0                  | 0                   |
| <b>seq453</b>  | Bacteroidetes | Bacteroidia  | 0                  | 0                   | 0                  | 0                   |
| <b>seq538</b>  | Bacteroidetes | Bacteroidia  | 0                  | 0                   | 0                  | 0                   |
| <b>seq541</b>  | Bacteroidetes | Bacteroidia  | 0                  | 0                   | 0                  | 0                   |
| <b>seq583</b>  | Bacteroidetes | Bacteroidia  | 0                  | 0                   | 0                  | 0                   |
| <b>seq641</b>  | Bacteroidetes | Bacteroidia  | 0                  | 0                   | 0                  | 0                   |
| <b>seq673</b>  | Bacteroidetes | Bacteroidia  | 0                  | 0                   | 0                  | 0                   |
| <b>seq703</b>  | Bacteroidetes | Bacteroidia  | 0                  | 0                   | 0                  | 0                   |
| <b>seq722</b>  | Bacteroidetes | Bacteroidia  | 0                  | 0                   | 0                  | 0                   |
| <b>seq850</b>  | Bacteroidetes | Bacteroidia  | 0                  | 0                   | 0                  | 0                   |
| <b>seq1201</b> | Bacteroidetes | Bacteroidia  | 0                  | 0                   | 0                  | 0                   |
| <b>seq1207</b> | Bacteroidetes | Bacteroidia  | 0                  | 0                   | 0                  | 0                   |
| <b>seq1242</b> | Bacteroidetes | Bacteroidia  | 0                  | 0                   | 0                  | 0                   |
| <b>seq1566</b> | Bacteroidetes | Bacteroidia  | 0                  | 0                   | 0                  | 0                   |
| <b>seq135</b>  | Bacteroidetes | Bacteroidia  | 328                | 660                 | 0                  | 0                   |
| <b>seq370</b>  | Bacteroidetes | Bacteroidia  | 0                  | 0                   | 0                  | 0                   |
| <b>seq488</b>  | Bacteroidetes | Bacteroidia  | 0                  | 0                   | 310                | 333                 |
| <b>seq499</b>  | Bacteroidetes | Bacteroidia  | 0                  | 0                   | 0                  | 0                   |
| <b>seq751</b>  | Bacteroidetes | Bacteroidia  | 0                  | 0                   | 0                  | 0                   |
| <b>seq761</b>  | Bacteroidetes | Bacteroidia  | 0                  | 0                   | 0                  | 0                   |
| <b>seq1069</b> | Bacteroidetes | Bacteroidia  | 0                  | 0                   | 0                  | 0                   |
| <b>seq1153</b> | Bacteroidetes | Bacteroidia  | 0                  | 0                   | 0                  | 0                   |
| <b>seq1410</b> | Bacteroidetes | Bacteroidia  | 0                  | 0                   | 0                  | 0                   |
| <b>seq1680</b> | Bacteroidetes | Bacteroidia  | 0                  | 0                   | 0                  | 0                   |
| <b>seq1039</b> | Bacteroidetes | Bacteroidia  | 0                  | 0                   | 0                  | 0                   |
| <b>seq254</b>  | Bacteroidetes | Bacteroidia  | 0                  | 0                   | 0                  | 0                   |
| <b>seq766</b>  | Bacteroidetes | Bacteroidia  | 0                  | 0                   | 0                  | 0                   |

Sequence Count Table

|                | <b>Phylum</b> | <b>Class</b> | <b>Subject6WK0</b> | <b>Subject6WK12</b> | <b>Subject18WK0</b> | <b>Subject18WK12</b> |
|----------------|---------------|--------------|--------------------|---------------------|---------------------|----------------------|
| <b>seq437</b>  | Bacteroidetes | Bacteroidia  | 280                | 782                 | 0                   | 0                    |
| <b>seq332</b>  | Bacteroidetes | Bacteroidia  | 107                | 67                  | 0                   | 0                    |
| <b>seq717</b>  | Bacteroidetes | Bacteroidia  | 0                  | 0                   | 160                 | 193                  |
| <b>seq888</b>  | Bacteroidetes | Bacteroidia  | 0                  | 0                   | 0                   | 0                    |
| <b>seq702</b>  | Bacteroidetes | Bacteroidia  | 0                  | 0                   | 0                   | 0                    |
| <b>seq413</b>  | Bacteroidetes | Bacteroidia  | 0                  | 0                   | 0                   | 120                  |
| <b>seq453</b>  | Bacteroidetes | Bacteroidia  | 0                  | 0                   | 0                   | 0                    |
| <b>seq538</b>  | Bacteroidetes | Bacteroidia  | 0                  | 0                   | 0                   | 0                    |
| <b>seq541</b>  | Bacteroidetes | Bacteroidia  | 254                | 402                 | 0                   | 0                    |
| <b>seq583</b>  | Bacteroidetes | Bacteroidia  | 0                  | 0                   | 0                   | 0                    |
| <b>seq641</b>  | Bacteroidetes | Bacteroidia  | 0                  | 0                   | 0                   | 0                    |
| <b>seq673</b>  | Bacteroidetes | Bacteroidia  | 0                  | 0                   | 0                   | 0                    |
| <b>seq703</b>  | Bacteroidetes | Bacteroidia  | 0                  | 0                   | 40                  | 0                    |
| <b>seq722</b>  | Bacteroidetes | Bacteroidia  | 0                  | 0                   | 0                   | 0                    |
| <b>seq850</b>  | Bacteroidetes | Bacteroidia  | 0                  | 0                   | 0                   | 0                    |
| <b>seq1201</b> | Bacteroidetes | Bacteroidia  | 0                  | 0                   | 0                   | 0                    |
| <b>seq1207</b> | Bacteroidetes | Bacteroidia  | 0                  | 0                   | 0                   | 0                    |
| <b>seq1242</b> | Bacteroidetes | Bacteroidia  | 0                  | 0                   | 0                   | 0                    |
| <b>seq1566</b> | Bacteroidetes | Bacteroidia  | 0                  | 0                   | 0                   | 0                    |
| <b>seq135</b>  | Bacteroidetes | Bacteroidia  | 274                | 528                 | 545                 | 176                  |
| <b>seq370</b>  | Bacteroidetes | Bacteroidia  | 0                  | 0                   | 0                   | 0                    |
| <b>seq488</b>  | Bacteroidetes | Bacteroidia  | 0                  | 0                   | 0                   | 0                    |
| <b>seq499</b>  | Bacteroidetes | Bacteroidia  | 0                  | 0                   | 0                   | 0                    |
| <b>seq751</b>  | Bacteroidetes | Bacteroidia  | 0                  | 0                   | 0                   | 0                    |
| <b>seq761</b>  | Bacteroidetes | Bacteroidia  | 0                  | 0                   | 0                   | 0                    |
| <b>seq1069</b> | Bacteroidetes | Bacteroidia  | 0                  | 0                   | 0                   | 0                    |
| <b>seq1153</b> | Bacteroidetes | Bacteroidia  | 0                  | 0                   | 0                   | 0                    |
| <b>seq1410</b> | Bacteroidetes | Bacteroidia  | 0                  | 0                   | 0                   | 0                    |
| <b>seq1680</b> | Bacteroidetes | Bacteroidia  | 0                  | 0                   | 0                   | 0                    |
| <b>seq1039</b> | Bacteroidetes | Bacteroidia  | 0                  | 0                   | 0                   | 0                    |
| <b>seq254</b>  | Bacteroidetes | Bacteroidia  | 0                  | 0                   | 0                   | 0                    |
| <b>seq766</b>  | Bacteroidetes | Bacteroidia  | 0                  | 0                   | 0                   | 0                    |

Sequence Count Table

|                | <b>Phylum</b> | <b>Class</b> | <b>Subject19WK0</b> | <b>Subject19WK12</b> | <b>Subject20WK0</b> | <b>Subject20WK12</b> |
|----------------|---------------|--------------|---------------------|----------------------|---------------------|----------------------|
| <b>seq437</b>  | Bacteroidetes | Bacteroidia  | 0                   | 0                    | 0                   | 0                    |
| <b>seq332</b>  | Bacteroidetes | Bacteroidia  | 0                   | 0                    | 0                   | 0                    |
| <b>seq717</b>  | Bacteroidetes | Bacteroidia  | 0                   | 0                    | 0                   | 0                    |
| <b>seq888</b>  | Bacteroidetes | Bacteroidia  | 0                   | 0                    | 0                   | 0                    |
| <b>seq702</b>  | Bacteroidetes | Bacteroidia  | 0                   | 0                    | 59                  | 0                    |
| <b>seq413</b>  | Bacteroidetes | Bacteroidia  | 0                   | 0                    | 0                   | 0                    |
| <b>seq453</b>  | Bacteroidetes | Bacteroidia  | 0                   | 0                    | 0                   | 0                    |
| <b>seq538</b>  | Bacteroidetes | Bacteroidia  | 0                   | 0                    | 105                 | 117                  |
| <b>seq541</b>  | Bacteroidetes | Bacteroidia  | 0                   | 0                    | 0                   | 0                    |
| <b>seq583</b>  | Bacteroidetes | Bacteroidia  | 0                   | 0                    | 0                   | 0                    |
| <b>seq641</b>  | Bacteroidetes | Bacteroidia  | 0                   | 0                    | 0                   | 0                    |
| <b>seq673</b>  | Bacteroidetes | Bacteroidia  | 0                   | 0                    | 0                   | 0                    |
| <b>seq703</b>  | Bacteroidetes | Bacteroidia  | 0                   | 0                    | 0                   | 0                    |
| <b>seq722</b>  | Bacteroidetes | Bacteroidia  | 0                   | 0                    | 0                   | 0                    |
| <b>seq850</b>  | Bacteroidetes | Bacteroidia  | 0                   | 0                    | 0                   | 0                    |
| <b>seq1201</b> | Bacteroidetes | Bacteroidia  | 0                   | 0                    | 0                   | 0                    |
| <b>seq1207</b> | Bacteroidetes | Bacteroidia  | 0                   | 0                    | 0                   | 0                    |
| <b>seq1242</b> | Bacteroidetes | Bacteroidia  | 0                   | 0                    | 0                   | 0                    |
| <b>seq1566</b> | Bacteroidetes | Bacteroidia  | 0                   | 0                    | 22                  | 0                    |
| <b>seq135</b>  | Bacteroidetes | Bacteroidia  | 0                   | 0                    | 76                  | 212                  |
| <b>seq370</b>  | Bacteroidetes | Bacteroidia  | 0                   | 0                    | 0                   | 0                    |
| <b>seq488</b>  | Bacteroidetes | Bacteroidia  | 0                   | 0                    | 0                   | 0                    |
| <b>seq499</b>  | Bacteroidetes | Bacteroidia  | 0                   | 0                    | 0                   | 0                    |
| <b>seq751</b>  | Bacteroidetes | Bacteroidia  | 0                   | 0                    | 0                   | 0                    |
| <b>seq761</b>  | Bacteroidetes | Bacteroidia  | 0                   | 0                    | 0                   | 0                    |
| <b>seq1069</b> | Bacteroidetes | Bacteroidia  | 0                   | 0                    | 0                   | 0                    |
| <b>seq1153</b> | Bacteroidetes | Bacteroidia  | 0                   | 0                    | 0                   | 0                    |
| <b>seq1410</b> | Bacteroidetes | Bacteroidia  | 0                   | 0                    | 0                   | 0                    |
| <b>seq1680</b> | Bacteroidetes | Bacteroidia  | 0                   | 0                    | 0                   | 0                    |
| <b>seq1039</b> | Bacteroidetes | Bacteroidia  | 0                   | 0                    | 0                   | 0                    |
| <b>seq254</b>  | Bacteroidetes | Bacteroidia  | 0                   | 0                    | 813                 | 439                  |
| <b>seq766</b>  | Bacteroidetes | Bacteroidia  | 0                   | 0                    | 0                   | 0                    |

Sequence Count Table

|                | <b>Phylum</b> | <b>Class</b> | <b>Subject7WK0</b> | <b>Subject7WK12</b> | <b>Subject21WK0</b> | <b>Subject21WK12</b> |
|----------------|---------------|--------------|--------------------|---------------------|---------------------|----------------------|
| <b>seq437</b>  | Bacteroidetes | Bacteroidia  | 0                  | 0                   | 0                   | 0                    |
| <b>seq332</b>  | Bacteroidetes | Bacteroidia  | 0                  | 0                   | 0                   | 0                    |
| <b>seq717</b>  | Bacteroidetes | Bacteroidia  | 0                  | 0                   | 0                   | 0                    |
| <b>seq888</b>  | Bacteroidetes | Bacteroidia  | 0                  | 0                   | 0                   | 0                    |
| <b>seq702</b>  | Bacteroidetes | Bacteroidia  | 0                  | 0                   | 0                   | 0                    |
| <b>seq413</b>  | Bacteroidetes | Bacteroidia  | 0                  | 0                   | 0                   | 0                    |
| <b>seq453</b>  | Bacteroidetes | Bacteroidia  | 0                  | 0                   | 0                   | 0                    |
| <b>seq538</b>  | Bacteroidetes | Bacteroidia  | 0                  | 0                   | 0                   | 0                    |
| <b>seq541</b>  | Bacteroidetes | Bacteroidia  | 0                  | 0                   | 0                   | 0                    |
| <b>seq583</b>  | Bacteroidetes | Bacteroidia  | 0                  | 0                   | 0                   | 0                    |
| <b>seq641</b>  | Bacteroidetes | Bacteroidia  | 0                  | 0                   | 0                   | 0                    |
| <b>seq673</b>  | Bacteroidetes | Bacteroidia  | 69                 | 162                 | 0                   | 0                    |
| <b>seq703</b>  | Bacteroidetes | Bacteroidia  | 0                  | 0                   | 0                   | 0                    |
| <b>seq722</b>  | Bacteroidetes | Bacteroidia  | 0                  | 0                   | 0                   | 0                    |
| <b>seq850</b>  | Bacteroidetes | Bacteroidia  | 0                  | 0                   | 0                   | 0                    |
| <b>seq1201</b> | Bacteroidetes | Bacteroidia  | 0                  | 0                   | 0                   | 0                    |
| <b>seq1207</b> | Bacteroidetes | Bacteroidia  | 0                  | 0                   | 0                   | 0                    |
| <b>seq1242</b> | Bacteroidetes | Bacteroidia  | 0                  | 0                   | 0                   | 0                    |
| <b>seq1566</b> | Bacteroidetes | Bacteroidia  | 0                  | 0                   | 0                   | 0                    |
| <b>seq135</b>  | Bacteroidetes | Bacteroidia  | 411                | 558                 | 0                   | 0                    |
| <b>seq370</b>  | Bacteroidetes | Bacteroidia  | 0                  | 0                   | 0                   | 0                    |
| <b>seq488</b>  | Bacteroidetes | Bacteroidia  | 0                  | 0                   | 0                   | 0                    |
| <b>seq499</b>  | Bacteroidetes | Bacteroidia  | 0                  | 14                  | 0                   | 0                    |
| <b>seq751</b>  | Bacteroidetes | Bacteroidia  | 0                  | 0                   | 0                   | 0                    |
| <b>seq761</b>  | Bacteroidetes | Bacteroidia  | 0                  | 0                   | 0                   | 0                    |
| <b>seq1069</b> | Bacteroidetes | Bacteroidia  | 0                  | 0                   | 0                   | 0                    |
| <b>seq1153</b> | Bacteroidetes | Bacteroidia  | 0                  | 0                   | 0                   | 0                    |
| <b>seq1410</b> | Bacteroidetes | Bacteroidia  | 0                  | 0                   | 0                   | 0                    |
| <b>seq1680</b> | Bacteroidetes | Bacteroidia  | 0                  | 0                   | 0                   | 0                    |
| <b>seq1039</b> | Bacteroidetes | Bacteroidia  | 0                  | 0                   | 0                   | 0                    |
| <b>seq254</b>  | Bacteroidetes | Bacteroidia  | 0                  | 0                   | 0                   | 0                    |
| <b>seq766</b>  | Bacteroidetes | Bacteroidia  | 20                 | 280                 | 0                   | 0                    |

Sequence Count Table

|                | <b>Phylum</b> | <b>Class</b> | <b>Subject8WK0</b> | <b>Subject8WK12</b> | <b>Subject9WK0</b> | <b>Subject9WK12</b> |
|----------------|---------------|--------------|--------------------|---------------------|--------------------|---------------------|
| <b>seq437</b>  | Bacteroidetes | Bacteroidia  | 0                  | 0                   | 0                  | 0                   |
| <b>seq332</b>  | Bacteroidetes | Bacteroidia  | 0                  | 0                   | 0                  | 0                   |
| <b>seq717</b>  | Bacteroidetes | Bacteroidia  | 0                  | 0                   | 0                  | 0                   |
| <b>seq888</b>  | Bacteroidetes | Bacteroidia  | 0                  | 0                   | 0                  | 0                   |
| <b>seq702</b>  | Bacteroidetes | Bacteroidia  | 0                  | 0                   | 0                  | 0                   |
| <b>seq413</b>  | Bacteroidetes | Bacteroidia  | 55                 | 95                  | 0                  | 0                   |
| <b>seq453</b>  | Bacteroidetes | Bacteroidia  | 0                  | 0                   | 0                  | 0                   |
| <b>seq538</b>  | Bacteroidetes | Bacteroidia  | 0                  | 0                   | 0                  | 0                   |
| <b>seq541</b>  | Bacteroidetes | Bacteroidia  | 0                  | 0                   | 0                  | 0                   |
| <b>seq583</b>  | Bacteroidetes | Bacteroidia  | 177                | 285                 | 0                  | 0                   |
| <b>seq641</b>  | Bacteroidetes | Bacteroidia  | 0                  | 0                   | 0                  | 0                   |
| <b>seq673</b>  | Bacteroidetes | Bacteroidia  | 0                  | 0                   | 0                  | 0                   |
| <b>seq703</b>  | Bacteroidetes | Bacteroidia  | 65                 | 99                  | 0                  | 0                   |
| <b>seq722</b>  | Bacteroidetes | Bacteroidia  | 0                  | 0                   | 0                  | 0                   |
| <b>seq850</b>  | Bacteroidetes | Bacteroidia  | 0                  | 0                   | 0                  | 0                   |
| <b>seq1201</b> | Bacteroidetes | Bacteroidia  | 0                  | 0                   | 0                  | 0                   |
| <b>seq1207</b> | Bacteroidetes | Bacteroidia  | 0                  | 0                   | 0                  | 0                   |
| <b>seq1242</b> | Bacteroidetes | Bacteroidia  | 0                  | 0                   | 0                  | 0                   |
| <b>seq1566</b> | Bacteroidetes | Bacteroidia  | 0                  | 0                   | 0                  | 0                   |
| <b>seq135</b>  | Bacteroidetes | Bacteroidia  | 384                | 372                 | 189                | 113                 |
| <b>seq370</b>  | Bacteroidetes | Bacteroidia  | 0                  | 0                   | 0                  | 0                   |
| <b>seq488</b>  | Bacteroidetes | Bacteroidia  | 0                  | 0                   | 0                  | 0                   |
| <b>seq499</b>  | Bacteroidetes | Bacteroidia  | 0                  | 0                   | 0                  | 0                   |
| <b>seq751</b>  | Bacteroidetes | Bacteroidia  | 0                  | 0                   | 0                  | 0                   |
| <b>seq761</b>  | Bacteroidetes | Bacteroidia  | 0                  | 0                   | 192                | 114                 |
| <b>seq1069</b> | Bacteroidetes | Bacteroidia  | 0                  | 0                   | 0                  | 0                   |
| <b>seq1153</b> | Bacteroidetes | Bacteroidia  | 0                  | 0                   | 0                  | 0                   |
| <b>seq1410</b> | Bacteroidetes | Bacteroidia  | 0                  | 0                   | 0                  | 0                   |
| <b>seq1680</b> | Bacteroidetes | Bacteroidia  | 0                  | 0                   | 0                  | 0                   |
| <b>seq1039</b> | Bacteroidetes | Bacteroidia  | 0                  | 0                   | 0                  | 0                   |
| <b>seq254</b>  | Bacteroidetes | Bacteroidia  | 0                  | 0                   | 0                  | 0                   |
| <b>seq766</b>  | Bacteroidetes | Bacteroidia  | 0                  | 0                   | 0                  | 0                   |

Sequence Count Table

|                | <b>Phylum</b> | <b>Class</b> | <b>Subject10WK0</b> | <b>Subject10WK12</b> | <b>Subject22WK0</b> | <b>Subject22WK12</b> |
|----------------|---------------|--------------|---------------------|----------------------|---------------------|----------------------|
| <b>seq437</b>  | Bacteroidetes | Bacteroidia  | 0                   | 0                    | 0                   | 0                    |
| <b>seq332</b>  | Bacteroidetes | Bacteroidia  | 0                   | 0                    | 0                   | 0                    |
| <b>seq717</b>  | Bacteroidetes | Bacteroidia  | 0                   | 0                    | 0                   | 0                    |
| <b>seq888</b>  | Bacteroidetes | Bacteroidia  | 0                   | 0                    | 0                   | 0                    |
| <b>seq702</b>  | Bacteroidetes | Bacteroidia  | 0                   | 0                    | 0                   | 0                    |
| <b>seq413</b>  | Bacteroidetes | Bacteroidia  | 0                   | 0                    | 0                   | 0                    |
| <b>seq453</b>  | Bacteroidetes | Bacteroidia  | 0                   | 0                    | 0                   | 50                   |
| <b>seq538</b>  | Bacteroidetes | Bacteroidia  | 0                   | 0                    | 0                   | 0                    |
| <b>seq541</b>  | Bacteroidetes | Bacteroidia  | 0                   | 0                    | 0                   | 0                    |
| <b>seq583</b>  | Bacteroidetes | Bacteroidia  | 0                   | 0                    | 0                   | 0                    |
| <b>seq641</b>  | Bacteroidetes | Bacteroidia  | 0                   | 0                    | 0                   | 0                    |
| <b>seq673</b>  | Bacteroidetes | Bacteroidia  | 0                   | 0                    | 0                   | 0                    |
| <b>seq703</b>  | Bacteroidetes | Bacteroidia  | 0                   | 0                    | 0                   | 0                    |
| <b>seq722</b>  | Bacteroidetes | Bacteroidia  | 0                   | 0                    | 0                   | 0                    |
| <b>seq850</b>  | Bacteroidetes | Bacteroidia  | 0                   | 0                    | 0                   | 51                   |
| <b>seq1201</b> | Bacteroidetes | Bacteroidia  | 0                   | 0                    | 0                   | 0                    |
| <b>seq1207</b> | Bacteroidetes | Bacteroidia  | 0                   | 0                    | 43                  | 35                   |
| <b>seq1242</b> | Bacteroidetes | Bacteroidia  | 0                   | 0                    | 69                  | 0                    |
| <b>seq1566</b> | Bacteroidetes | Bacteroidia  | 0                   | 0                    | 0                   | 0                    |
| <b>seq135</b>  | Bacteroidetes | Bacteroidia  | 0                   | 0                    | 362                 | 440                  |
| <b>seq370</b>  | Bacteroidetes | Bacteroidia  | 0                   | 0                    | 0                   | 0                    |
| <b>seq488</b>  | Bacteroidetes | Bacteroidia  | 0                   | 0                    | 0                   | 0                    |
| <b>seq499</b>  | Bacteroidetes | Bacteroidia  | 0                   | 0                    | 0                   | 0                    |
| <b>seq751</b>  | Bacteroidetes | Bacteroidia  | 0                   | 0                    | 0                   | 0                    |
| <b>seq761</b>  | Bacteroidetes | Bacteroidia  | 0                   | 0                    | 0                   | 0                    |
| <b>seq1069</b> | Bacteroidetes | Bacteroidia  | 0                   | 0                    | 0                   | 0                    |
| <b>seq1153</b> | Bacteroidetes | Bacteroidia  | 0                   | 0                    | 0                   | 0                    |
| <b>seq1410</b> | Bacteroidetes | Bacteroidia  | 0                   | 0                    | 0                   | 0                    |
| <b>seq1680</b> | Bacteroidetes | Bacteroidia  | 0                   | 0                    | 0                   | 0                    |
| <b>seq1039</b> | Bacteroidetes | Bacteroidia  | 0                   | 0                    | 0                   | 0                    |
| <b>seq254</b>  | Bacteroidetes | Bacteroidia  | 0                   | 0                    | 50                  | 43                   |
| <b>seq766</b>  | Bacteroidetes | Bacteroidia  | 0                   | 0                    | 0                   | 0                    |



Sequence Count Table

|                | <b>Phylum</b> | <b>Class</b> | <b>Subject23WK0</b> | <b>Subject23WK12</b> | <b>Subject24WK0</b> | <b>Subject24WK12</b> |
|----------------|---------------|--------------|---------------------|----------------------|---------------------|----------------------|
| <b>seq437</b>  | Bacteroidetes | Bacteroidia  | 0                   | 0                    | 0                   | 0                    |
| <b>seq332</b>  | Bacteroidetes | Bacteroidia  | 0                   | 0                    | 0                   | 0                    |
| <b>seq717</b>  | Bacteroidetes | Bacteroidia  | 0                   | 0                    | 0                   | 0                    |
| <b>seq888</b>  | Bacteroidetes | Bacteroidia  | 0                   | 0                    | 0                   | 0                    |
| <b>seq702</b>  | Bacteroidetes | Bacteroidia  | 0                   | 0                    | 0                   | 0                    |
| <b>seq413</b>  | Bacteroidetes | Bacteroidia  | 0                   | 0                    | 0                   | 0                    |
| <b>seq453</b>  | Bacteroidetes | Bacteroidia  | 0                   | 0                    | 0                   | 0                    |
| <b>seq538</b>  | Bacteroidetes | Bacteroidia  | 0                   | 0                    | 0                   | 0                    |
| <b>seq541</b>  | Bacteroidetes | Bacteroidia  | 0                   | 0                    | 0                   | 0                    |
| <b>seq583</b>  | Bacteroidetes | Bacteroidia  | 0                   | 0                    | 0                   | 0                    |
| <b>seq641</b>  | Bacteroidetes | Bacteroidia  | 0                   | 0                    | 0                   | 0                    |
| <b>seq673</b>  | Bacteroidetes | Bacteroidia  | 0                   | 0                    | 0                   | 0                    |
| <b>seq703</b>  | Bacteroidetes | Bacteroidia  | 0                   | 0                    | 0                   | 0                    |
| <b>seq722</b>  | Bacteroidetes | Bacteroidia  | 0                   | 0                    | 0                   | 0                    |
| <b>seq850</b>  | Bacteroidetes | Bacteroidia  | 29                  | 144                  | 0                   | 0                    |
| <b>seq1201</b> | Bacteroidetes | Bacteroidia  | 0                   | 0                    | 0                   | 0                    |
| <b>seq1207</b> | Bacteroidetes | Bacteroidia  | 0                   | 0                    | 0                   | 0                    |
| <b>seq1242</b> | Bacteroidetes | Bacteroidia  | 0                   | 0                    | 0                   | 0                    |
| <b>seq1566</b> | Bacteroidetes | Bacteroidia  | 0                   | 0                    | 0                   | 0                    |
| <b>seq135</b>  | Bacteroidetes | Bacteroidia  | 106                 | 263                  | 298                 | 433                  |
| <b>seq370</b>  | Bacteroidetes | Bacteroidia  | 0                   | 0                    | 0                   | 0                    |
| <b>seq488</b>  | Bacteroidetes | Bacteroidia  | 0                   | 0                    | 0                   | 0                    |
| <b>seq499</b>  | Bacteroidetes | Bacteroidia  | 0                   | 0                    | 0                   | 0                    |
| <b>seq751</b>  | Bacteroidetes | Bacteroidia  | 0                   | 0                    | 0                   | 0                    |
| <b>seq761</b>  | Bacteroidetes | Bacteroidia  | 0                   | 0                    | 0                   | 0                    |
| <b>seq1069</b> | Bacteroidetes | Bacteroidia  | 44                  | 71                   | 0                   | 0                    |
| <b>seq1153</b> | Bacteroidetes | Bacteroidia  | 25                  | 54                   | 0                   | 0                    |
| <b>seq1410</b> | Bacteroidetes | Bacteroidia  | 0                   | 40                   | 0                   | 0                    |
| <b>seq1680</b> | Bacteroidetes | Bacteroidia  | 0                   | 14                   | 0                   | 0                    |
| <b>seq1039</b> | Bacteroidetes | Bacteroidia  | 0                   | 0                    | 0                   | 0                    |
| <b>seq254</b>  | Bacteroidetes | Bacteroidia  | 0                   | 0                    | 0                   | 0                    |
| <b>seq766</b>  | Bacteroidetes | Bacteroidia  | 0                   | 0                    | 0                   | 0                    |

Sequence Count Table

|                | <b>Phylum</b> | <b>Class</b> | <b>Subject11WK0</b> | <b>Subject11WK12</b> | <b>Subject12WK0</b> | <b>Subject12WK12</b> |
|----------------|---------------|--------------|---------------------|----------------------|---------------------|----------------------|
| <b>seq437</b>  | Bacteroidetes | Bacteroidia  | 0                   | 0                    | 0                   | 0                    |
| <b>seq332</b>  | Bacteroidetes | Bacteroidia  | 0                   | 0                    | 0                   | 0                    |
| <b>seq717</b>  | Bacteroidetes | Bacteroidia  | 0                   | 0                    | 0                   | 0                    |
| <b>seq888</b>  | Bacteroidetes | Bacteroidia  | 0                   | 0                    | 53                  | 151                  |
| <b>seq702</b>  | Bacteroidetes | Bacteroidia  | 0                   | 0                    | 85                  | 158                  |
| <b>seq413</b>  | Bacteroidetes | Bacteroidia  | 143                 | 68                   | 0                   | 0                    |
| <b>seq453</b>  | Bacteroidetes | Bacteroidia  | 239                 | 180                  | 95                  | 102                  |
| <b>seq538</b>  | Bacteroidetes | Bacteroidia  | 0                   | 0                    | 0                   | 0                    |
| <b>seq541</b>  | Bacteroidetes | Bacteroidia  | 0                   | 0                    | 0                   | 0                    |
| <b>seq583</b>  | Bacteroidetes | Bacteroidia  | 113                 | 0                    | 0                   | 0                    |
| <b>seq641</b>  | Bacteroidetes | Bacteroidia  | 0                   | 0                    | 0                   | 0                    |
| <b>seq673</b>  | Bacteroidetes | Bacteroidia  | 0                   | 0                    | 0                   | 0                    |
| <b>seq703</b>  | Bacteroidetes | Bacteroidia  | 99                  | 74                   | 0                   | 0                    |
| <b>seq722</b>  | Bacteroidetes | Bacteroidia  | 0                   | 0                    | 0                   | 0                    |
| <b>seq850</b>  | Bacteroidetes | Bacteroidia  | 0                   | 0                    | 0                   | 0                    |
| <b>seq1201</b> | Bacteroidetes | Bacteroidia  | 0                   | 0                    | 0                   | 0                    |
| <b>seq1207</b> | Bacteroidetes | Bacteroidia  | 0                   | 0                    | 0                   | 0                    |
| <b>seq1242</b> | Bacteroidetes | Bacteroidia  | 0                   | 0                    | 0                   | 0                    |
| <b>seq1566</b> | Bacteroidetes | Bacteroidia  | 0                   | 0                    | 0                   | 0                    |
| <b>seq135</b>  | Bacteroidetes | Bacteroidia  | 0                   | 0                    | 266                 | 364                  |
| <b>seq370</b>  | Bacteroidetes | Bacteroidia  | 0                   | 0                    | 0                   | 0                    |
| <b>seq488</b>  | Bacteroidetes | Bacteroidia  | 0                   | 0                    | 0                   | 0                    |
| <b>seq499</b>  | Bacteroidetes | Bacteroidia  | 0                   | 0                    | 0                   | 0                    |
| <b>seq751</b>  | Bacteroidetes | Bacteroidia  | 0                   | 0                    | 0                   | 0                    |
| <b>seq761</b>  | Bacteroidetes | Bacteroidia  | 0                   | 0                    | 0                   | 0                    |
| <b>seq1069</b> | Bacteroidetes | Bacteroidia  | 0                   | 0                    | 0                   | 0                    |
| <b>seq1153</b> | Bacteroidetes | Bacteroidia  | 0                   | 13                   | 0                   | 0                    |
| <b>seq1410</b> | Bacteroidetes | Bacteroidia  | 0                   | 0                    | 0                   | 0                    |
| <b>seq1680</b> | Bacteroidetes | Bacteroidia  | 0                   | 0                    | 0                   | 0                    |
| <b>seq1039</b> | Bacteroidetes | Bacteroidia  | 0                   | 0                    | 0                   | 0                    |
| <b>seq254</b>  | Bacteroidetes | Bacteroidia  | 0                   | 0                    | 0                   | 0                    |
| <b>seq766</b>  | Bacteroidetes | Bacteroidia  | 0                   | 0                    | 0                   | 0                    |

Sequence Count Table

|                | <b>Phylum</b> | <b>Class</b> | <b>Subject25WK0</b> | <b>Subject25WK12</b> | <b>Subject38WK0</b> | <b>Subject38WK12</b> |
|----------------|---------------|--------------|---------------------|----------------------|---------------------|----------------------|
| <b>seq437</b>  | Bacteroidetes | Bacteroidia  | 0                   | 0                    | 0                   | 0                    |
| <b>seq332</b>  | Bacteroidetes | Bacteroidia  | 0                   | 0                    | 0                   | 0                    |
| <b>seq717</b>  | Bacteroidetes | Bacteroidia  | 0                   | 0                    | 0                   | 0                    |
| <b>seq888</b>  | Bacteroidetes | Bacteroidia  | 0                   | 0                    | 0                   | 0                    |
| <b>seq702</b>  | Bacteroidetes | Bacteroidia  | 0                   | 0                    | 0                   | 0                    |
| <b>seq413</b>  | Bacteroidetes | Bacteroidia  | 0                   | 0                    | 0                   | 0                    |
| <b>seq453</b>  | Bacteroidetes | Bacteroidia  | 0                   | 0                    | 0                   | 0                    |
| <b>seq538</b>  | Bacteroidetes | Bacteroidia  | 0                   | 0                    | 0                   | 0                    |
| <b>seq541</b>  | Bacteroidetes | Bacteroidia  | 0                   | 0                    | 0                   | 0                    |
| <b>seq583</b>  | Bacteroidetes | Bacteroidia  | 0                   | 0                    | 0                   | 0                    |
| <b>seq641</b>  | Bacteroidetes | Bacteroidia  | 0                   | 0                    | 0                   | 0                    |
| <b>seq673</b>  | Bacteroidetes | Bacteroidia  | 0                   | 0                    | 0                   | 0                    |
| <b>seq703</b>  | Bacteroidetes | Bacteroidia  | 0                   | 0                    | 0                   | 0                    |
| <b>seq722</b>  | Bacteroidetes | Bacteroidia  | 0                   | 0                    | 0                   | 0                    |
| <b>seq850</b>  | Bacteroidetes | Bacteroidia  | 0                   | 0                    | 0                   | 0                    |
| <b>seq1201</b> | Bacteroidetes | Bacteroidia  | 0                   | 0                    | 0                   | 0                    |
| <b>seq1207</b> | Bacteroidetes | Bacteroidia  | 0                   | 0                    | 0                   | 0                    |
| <b>seq1242</b> | Bacteroidetes | Bacteroidia  | 0                   | 0                    | 0                   | 0                    |
| <b>seq1566</b> | Bacteroidetes | Bacteroidia  | 0                   | 0                    | 0                   | 0                    |
| <b>seq135</b>  | Bacteroidetes | Bacteroidia  | 366                 | 266                  | 0                   | 0                    |
| <b>seq370</b>  | Bacteroidetes | Bacteroidia  | 0                   | 0                    | 0                   | 0                    |
| <b>seq488</b>  | Bacteroidetes | Bacteroidia  | 0                   | 0                    | 0                   | 0                    |
| <b>seq499</b>  | Bacteroidetes | Bacteroidia  | 0                   | 0                    | 0                   | 0                    |
| <b>seq751</b>  | Bacteroidetes | Bacteroidia  | 0                   | 0                    | 0                   | 0                    |
| <b>seq761</b>  | Bacteroidetes | Bacteroidia  | 0                   | 0                    | 0                   | 0                    |
| <b>seq1069</b> | Bacteroidetes | Bacteroidia  | 0                   | 0                    | 0                   | 0                    |
| <b>seq1153</b> | Bacteroidetes | Bacteroidia  | 0                   | 0                    | 0                   | 0                    |
| <b>seq1410</b> | Bacteroidetes | Bacteroidia  | 0                   | 0                    | 0                   | 0                    |
| <b>seq1680</b> | Bacteroidetes | Bacteroidia  | 0                   | 0                    | 0                   | 0                    |
| <b>seq1039</b> | Bacteroidetes | Bacteroidia  | 0                   | 0                    | 0                   | 0                    |
| <b>seq254</b>  | Bacteroidetes | Bacteroidia  | 0                   | 0                    | 0                   | 0                    |
| <b>seq766</b>  | Bacteroidetes | Bacteroidia  | 0                   | 0                    | 0                   | 0                    |

Sequence Count Table

|                | <b>Phylum</b> | <b>Class</b> | <b>Subject31WK0</b> | <b>Subject31WK12</b> | <b>Subject32WK0</b> | <b>Subject32WK12</b> |
|----------------|---------------|--------------|---------------------|----------------------|---------------------|----------------------|
| <b>seq437</b>  | Bacteroidetes | Bacteroidia  | 0                   | 0                    | 0                   | 0                    |
| <b>seq332</b>  | Bacteroidetes | Bacteroidia  | 0                   | 0                    | 0                   | 0                    |
| <b>seq717</b>  | Bacteroidetes | Bacteroidia  | 0                   | 0                    | 0                   | 0                    |
| <b>seq888</b>  | Bacteroidetes | Bacteroidia  | 0                   | 0                    | 0                   | 0                    |
| <b>seq702</b>  | Bacteroidetes | Bacteroidia  | 0                   | 0                    | 0                   | 0                    |
| <b>seq413</b>  | Bacteroidetes | Bacteroidia  | 0                   | 0                    | 0                   | 0                    |
| <b>seq453</b>  | Bacteroidetes | Bacteroidia  | 0                   | 0                    | 0                   | 0                    |
| <b>seq538</b>  | Bacteroidetes | Bacteroidia  | 0                   | 0                    | 0                   | 0                    |
| <b>seq541</b>  | Bacteroidetes | Bacteroidia  | 0                   | 0                    | 0                   | 0                    |
| <b>seq583</b>  | Bacteroidetes | Bacteroidia  | 0                   | 0                    | 0                   | 0                    |
| <b>seq641</b>  | Bacteroidetes | Bacteroidia  | 0                   | 0                    | 0                   | 0                    |
| <b>seq673</b>  | Bacteroidetes | Bacteroidia  | 0                   | 0                    | 0                   | 0                    |
| <b>seq703</b>  | Bacteroidetes | Bacteroidia  | 0                   | 0                    | 0                   | 0                    |
| <b>seq722</b>  | Bacteroidetes | Bacteroidia  | 0                   | 0                    | 0                   | 0                    |
| <b>seq850</b>  | Bacteroidetes | Bacteroidia  | 0                   | 0                    | 0                   | 0                    |
| <b>seq1201</b> | Bacteroidetes | Bacteroidia  | 0                   | 0                    | 0                   | 0                    |
| <b>seq1207</b> | Bacteroidetes | Bacteroidia  | 0                   | 0                    | 0                   | 0                    |
| <b>seq1242</b> | Bacteroidetes | Bacteroidia  | 0                   | 0                    | 0                   | 0                    |
| <b>seq1566</b> | Bacteroidetes | Bacteroidia  | 0                   | 0                    | 0                   | 0                    |
| <b>seq135</b>  | Bacteroidetes | Bacteroidia  | 0                   | 0                    | 191                 | 0                    |
| <b>seq370</b>  | Bacteroidetes | Bacteroidia  | 0                   | 0                    | 0                   | 0                    |
| <b>seq488</b>  | Bacteroidetes | Bacteroidia  | 0                   | 0                    | 0                   | 0                    |
| <b>seq499</b>  | Bacteroidetes | Bacteroidia  | 0                   | 0                    | 0                   | 0                    |
| <b>seq751</b>  | Bacteroidetes | Bacteroidia  | 0                   | 0                    | 0                   | 0                    |
| <b>seq761</b>  | Bacteroidetes | Bacteroidia  | 0                   | 0                    | 0                   | 0                    |
| <b>seq1069</b> | Bacteroidetes | Bacteroidia  | 0                   | 0                    | 0                   | 0                    |
| <b>seq1153</b> | Bacteroidetes | Bacteroidia  | 0                   | 0                    | 0                   | 0                    |
| <b>seq1410</b> | Bacteroidetes | Bacteroidia  | 0                   | 0                    | 0                   | 0                    |
| <b>seq1680</b> | Bacteroidetes | Bacteroidia  | 0                   | 0                    | 0                   | 0                    |
| <b>seq1039</b> | Bacteroidetes | Bacteroidia  | 0                   | 0                    | 0                   | 0                    |
| <b>seq254</b>  | Bacteroidetes | Bacteroidia  | 0                   | 0                    | 0                   | 0                    |
| <b>seq766</b>  | Bacteroidetes | Bacteroidia  | 0                   | 0                    | 0                   | 0                    |

Sequence Count Table

|                | <b>Phylum</b> | <b>Class</b> | <b>Subject13WK0</b> | <b>Subject13WK12</b> | <b>Subject39WK0</b> | <b>Subject39WK12</b> |
|----------------|---------------|--------------|---------------------|----------------------|---------------------|----------------------|
| <b>seq437</b>  | Bacteroidetes | Bacteroidia  | 0                   | 0                    | 0                   | 0                    |
| <b>seq332</b>  | Bacteroidetes | Bacteroidia  | 0                   | 0                    | 0                   | 0                    |
| <b>seq717</b>  | Bacteroidetes | Bacteroidia  | 0                   | 0                    | 0                   | 0                    |
| <b>seq888</b>  | Bacteroidetes | Bacteroidia  | 0                   | 0                    | 0                   | 0                    |
| <b>seq702</b>  | Bacteroidetes | Bacteroidia  | 0                   | 0                    | 0                   | 0                    |
| <b>seq413</b>  | Bacteroidetes | Bacteroidia  | 0                   | 0                    | 0                   | 0                    |
| <b>seq453</b>  | Bacteroidetes | Bacteroidia  | 0                   | 0                    | 0                   | 86                   |
| <b>seq538</b>  | Bacteroidetes | Bacteroidia  | 0                   | 0                    | 0                   | 0                    |
| <b>seq541</b>  | Bacteroidetes | Bacteroidia  | 0                   | 0                    | 0                   | 0                    |
| <b>seq583</b>  | Bacteroidetes | Bacteroidia  | 0                   | 0                    | 0                   | 0                    |
| <b>seq641</b>  | Bacteroidetes | Bacteroidia  | 0                   | 0                    | 0                   | 0                    |
| <b>seq673</b>  | Bacteroidetes | Bacteroidia  | 0                   | 0                    | 0                   | 0                    |
| <b>seq703</b>  | Bacteroidetes | Bacteroidia  | 0                   | 0                    | 0                   | 0                    |
| <b>seq722</b>  | Bacteroidetes | Bacteroidia  | 0                   | 0                    | 0                   | 0                    |
| <b>seq850</b>  | Bacteroidetes | Bacteroidia  | 0                   | 0                    | 0                   | 0                    |
| <b>seq1201</b> | Bacteroidetes | Bacteroidia  | 0                   | 0                    | 0                   | 0                    |
| <b>seq1207</b> | Bacteroidetes | Bacteroidia  | 0                   | 0                    | 0                   | 0                    |
| <b>seq1242</b> | Bacteroidetes | Bacteroidia  | 0                   | 0                    | 0                   | 0                    |
| <b>seq1566</b> | Bacteroidetes | Bacteroidia  | 0                   | 0                    | 0                   | 0                    |
| <b>seq135</b>  | Bacteroidetes | Bacteroidia  | 90                  | 89                   | 0                   | 114                  |
| <b>seq370</b>  | Bacteroidetes | Bacteroidia  | 0                   | 0                    | 0                   | 0                    |
| <b>seq488</b>  | Bacteroidetes | Bacteroidia  | 0                   | 0                    | 0                   | 0                    |
| <b>seq499</b>  | Bacteroidetes | Bacteroidia  | 0                   | 0                    | 0                   | 0                    |
| <b>seq751</b>  | Bacteroidetes | Bacteroidia  | 161                 | 154                  | 0                   | 0                    |
| <b>seq761</b>  | Bacteroidetes | Bacteroidia  | 0                   | 0                    | 0                   | 0                    |
| <b>seq1069</b> | Bacteroidetes | Bacteroidia  | 0                   | 0                    | 0                   | 0                    |
| <b>seq1153</b> | Bacteroidetes | Bacteroidia  | 0                   | 0                    | 0                   | 0                    |
| <b>seq1410</b> | Bacteroidetes | Bacteroidia  | 0                   | 0                    | 0                   | 0                    |
| <b>seq1680</b> | Bacteroidetes | Bacteroidia  | 0                   | 0                    | 0                   | 0                    |
| <b>seq1039</b> | Bacteroidetes | Bacteroidia  | 0                   | 0                    | 0                   | 0                    |
| <b>seq254</b>  | Bacteroidetes | Bacteroidia  | 0                   | 0                    | 0                   | 0                    |
| <b>seq766</b>  | Bacteroidetes | Bacteroidia  | 0                   | 0                    | 0                   | 0                    |

Sequence Count Table

|                | <b>Phylum</b> | <b>Class</b> | <b>Subject26WK0</b> | <b>Subject26WK12</b> | <b>Subject14WK0</b> | <b>Subject14WK12</b> |
|----------------|---------------|--------------|---------------------|----------------------|---------------------|----------------------|
| <b>seq437</b>  | Bacteroidetes | Bacteroidia  | 0                   | 0                    | 0                   | 0                    |
| <b>seq332</b>  | Bacteroidetes | Bacteroidia  | 0                   | 0                    | 0                   | 0                    |
| <b>seq717</b>  | Bacteroidetes | Bacteroidia  | 0                   | 0                    | 0                   | 0                    |
| <b>seq888</b>  | Bacteroidetes | Bacteroidia  | 0                   | 0                    | 0                   | 0                    |
| <b>seq702</b>  | Bacteroidetes | Bacteroidia  | 0                   | 0                    | 0                   | 0                    |
| <b>seq413</b>  | Bacteroidetes | Bacteroidia  | 0                   | 0                    | 0                   | 0                    |
| <b>seq453</b>  | Bacteroidetes | Bacteroidia  | 0                   | 0                    | 0                   | 0                    |
| <b>seq538</b>  | Bacteroidetes | Bacteroidia  | 0                   | 0                    | 0                   | 0                    |
| <b>seq541</b>  | Bacteroidetes | Bacteroidia  | 0                   | 0                    | 0                   | 0                    |
| <b>seq583</b>  | Bacteroidetes | Bacteroidia  | 0                   | 0                    | 0                   | 0                    |
| <b>seq641</b>  | Bacteroidetes | Bacteroidia  | 0                   | 0                    | 0                   | 0                    |
| <b>seq673</b>  | Bacteroidetes | Bacteroidia  | 0                   | 0                    | 15                  | 0                    |
| <b>seq703</b>  | Bacteroidetes | Bacteroidia  | 0                   | 0                    | 0                   | 0                    |
| <b>seq722</b>  | Bacteroidetes | Bacteroidia  | 0                   | 0                    | 0                   | 0                    |
| <b>seq850</b>  | Bacteroidetes | Bacteroidia  | 0                   | 0                    | 0                   | 0                    |
| <b>seq1201</b> | Bacteroidetes | Bacteroidia  | 0                   | 0                    | 0                   | 0                    |
| <b>seq1207</b> | Bacteroidetes | Bacteroidia  | 0                   | 0                    | 0                   | 0                    |
| <b>seq1242</b> | Bacteroidetes | Bacteroidia  | 0                   | 0                    | 0                   | 0                    |
| <b>seq1566</b> | Bacteroidetes | Bacteroidia  | 0                   | 0                    | 0                   | 0                    |
| <b>seq135</b>  | Bacteroidetes | Bacteroidia  | 138                 | 203                  | 369                 | 323                  |
| <b>seq370</b>  | Bacteroidetes | Bacteroidia  | 0                   | 0                    | 0                   | 0                    |
| <b>seq488</b>  | Bacteroidetes | Bacteroidia  | 0                   | 0                    | 0                   | 0                    |
| <b>seq499</b>  | Bacteroidetes | Bacteroidia  | 0                   | 0                    | 0                   | 0                    |
| <b>seq751</b>  | Bacteroidetes | Bacteroidia  | 0                   | 0                    | 0                   | 0                    |
| <b>seq761</b>  | Bacteroidetes | Bacteroidia  | 0                   | 0                    | 0                   | 0                    |
| <b>seq1069</b> | Bacteroidetes | Bacteroidia  | 0                   | 0                    | 0                   | 0                    |
| <b>seq1153</b> | Bacteroidetes | Bacteroidia  | 0                   | 0                    | 0                   | 0                    |
| <b>seq1410</b> | Bacteroidetes | Bacteroidia  | 0                   | 0                    | 0                   | 0                    |
| <b>seq1680</b> | Bacteroidetes | Bacteroidia  | 0                   | 0                    | 0                   | 0                    |
| <b>seq1039</b> | Bacteroidetes | Bacteroidia  | 0                   | 0                    | 0                   | 0                    |
| <b>seq254</b>  | Bacteroidetes | Bacteroidia  | 0                   | 0                    | 0                   | 0                    |
| <b>seq766</b>  | Bacteroidetes | Bacteroidia  | 0                   | 0                    | 0                   | 0                    |

Sequence Count Table

|                | <b>Phylum</b> | <b>Class</b> | <b>Subject27WK0</b> | <b>Subject27WK12</b> | <b>Subject15WK0</b> | <b>Subject15WK12</b> |
|----------------|---------------|--------------|---------------------|----------------------|---------------------|----------------------|
| <b>seq437</b>  | Bacteroidetes | Bacteroidia  | 0                   | 0                    | 0                   | 0                    |
| <b>seq332</b>  | Bacteroidetes | Bacteroidia  | 0                   | 0                    | 305                 | 272                  |
| <b>seq717</b>  | Bacteroidetes | Bacteroidia  | 0                   | 0                    | 0                   | 0                    |
| <b>seq888</b>  | Bacteroidetes | Bacteroidia  | 0                   | 0                    | 0                   | 0                    |
| <b>seq702</b>  | Bacteroidetes | Bacteroidia  | 0                   | 0                    | 0                   | 0                    |
| <b>seq413</b>  | Bacteroidetes | Bacteroidia  | 0                   | 0                    | 271                 | 220                  |
| <b>seq453</b>  | Bacteroidetes | Bacteroidia  | 0                   | 0                    | 0                   | 0                    |
| <b>seq538</b>  | Bacteroidetes | Bacteroidia  | 0                   | 0                    | 0                   | 0                    |
| <b>seq541</b>  | Bacteroidetes | Bacteroidia  | 0                   | 0                    | 0                   | 0                    |
| <b>seq583</b>  | Bacteroidetes | Bacteroidia  | 0                   | 0                    | 0                   | 0                    |
| <b>seq641</b>  | Bacteroidetes | Bacteroidia  | 0                   | 0                    | 0                   | 0                    |
| <b>seq673</b>  | Bacteroidetes | Bacteroidia  | 0                   | 0                    | 0                   | 0                    |
| <b>seq703</b>  | Bacteroidetes | Bacteroidia  | 0                   | 0                    | 0                   | 0                    |
| <b>seq722</b>  | Bacteroidetes | Bacteroidia  | 0                   | 0                    | 0                   | 0                    |
| <b>seq850</b>  | Bacteroidetes | Bacteroidia  | 0                   | 0                    | 0                   | 0                    |
| <b>seq1201</b> | Bacteroidetes | Bacteroidia  | 0                   | 0                    | 0                   | 0                    |
| <b>seq1207</b> | Bacteroidetes | Bacteroidia  | 0                   | 0                    | 0                   | 0                    |
| <b>seq1242</b> | Bacteroidetes | Bacteroidia  | 0                   | 0                    | 0                   | 0                    |
| <b>seq1566</b> | Bacteroidetes | Bacteroidia  | 0                   | 0                    | 0                   | 0                    |
| <b>seq135</b>  | Bacteroidetes | Bacteroidia  | 0                   | 0                    | 0                   | 0                    |
| <b>seq370</b>  | Bacteroidetes | Bacteroidia  | 0                   | 0                    | 0                   | 0                    |
| <b>seq488</b>  | Bacteroidetes | Bacteroidia  | 0                   | 0                    | 0                   | 0                    |
| <b>seq499</b>  | Bacteroidetes | Bacteroidia  | 0                   | 0                    | 0                   | 0                    |
| <b>seq751</b>  | Bacteroidetes | Bacteroidia  | 0                   | 0                    | 0                   | 0                    |
| <b>seq761</b>  | Bacteroidetes | Bacteroidia  | 0                   | 0                    | 0                   | 0                    |
| <b>seq1069</b> | Bacteroidetes | Bacteroidia  | 0                   | 0                    | 0                   | 0                    |
| <b>seq1153</b> | Bacteroidetes | Bacteroidia  | 0                   | 0                    | 0                   | 0                    |
| <b>seq1410</b> | Bacteroidetes | Bacteroidia  | 0                   | 0                    | 0                   | 0                    |
| <b>seq1680</b> | Bacteroidetes | Bacteroidia  | 0                   | 0                    | 0                   | 0                    |
| <b>seq1039</b> | Bacteroidetes | Bacteroidia  | 0                   | 0                    | 0                   | 0                    |
| <b>seq254</b>  | Bacteroidetes | Bacteroidia  | 703                 | 1113                 | 0                   | 0                    |
| <b>seq766</b>  | Bacteroidetes | Bacteroidia  | 0                   | 0                    | 0                   | 0                    |

Sequence Count Table

|                | <b>Phylum</b> | <b>Class</b> | <b>Δ</b> |  |  |  |
|----------------|---------------|--------------|----------|--|--|--|
| <b>seq437</b>  | Bacteroidetes | Bacteroidia  |          |  |  |  |
| <b>seq332</b>  | Bacteroidetes | Bacteroidia  |          |  |  |  |
| <b>seq717</b>  | Bacteroidetes | Bacteroidia  |          |  |  |  |
| <b>seq888</b>  | Bacteroidetes | Bacteroidia  |          |  |  |  |
| <b>seq702</b>  | Bacteroidetes | Bacteroidia  |          |  |  |  |
| <b>seq413</b>  | Bacteroidetes | Bacteroidia  |          |  |  |  |
| <b>seq453</b>  | Bacteroidetes | Bacteroidia  |          |  |  |  |
| <b>seq538</b>  | Bacteroidetes | Bacteroidia  |          |  |  |  |
| <b>seq541</b>  | Bacteroidetes | Bacteroidia  |          |  |  |  |
| <b>seq583</b>  | Bacteroidetes | Bacteroidia  |          |  |  |  |
| <b>seq641</b>  | Bacteroidetes | Bacteroidia  |          |  |  |  |
| <b>seq673</b>  | Bacteroidetes | Bacteroidia  |          |  |  |  |
| <b>seq703</b>  | Bacteroidetes | Bacteroidia  |          |  |  |  |
| <b>seq722</b>  | Bacteroidetes | Bacteroidia  |          |  |  |  |
| <b>seq850</b>  | Bacteroidetes | Bacteroidia  |          |  |  |  |
| <b>seq1201</b> | Bacteroidetes | Bacteroidia  |          |  |  |  |
| <b>seq1207</b> | Bacteroidetes | Bacteroidia  |          |  |  |  |
| <b>seq1242</b> | Bacteroidetes | Bacteroidia  |          |  |  |  |
| <b>seq1566</b> | Bacteroidetes | Bacteroidia  |          |  |  |  |
| <b>seq135</b>  | Bacteroidetes | Bacteroidia  |          |  |  |  |
| <b>seq370</b>  | Bacteroidetes | Bacteroidia  |          |  |  |  |
| <b>seq488</b>  | Bacteroidetes | Bacteroidia  |          |  |  |  |
| <b>seq499</b>  | Bacteroidetes | Bacteroidia  |          |  |  |  |
| <b>seq751</b>  | Bacteroidetes | Bacteroidia  |          |  |  |  |
| <b>seq761</b>  | Bacteroidetes | Bacteroidia  |          |  |  |  |
| <b>seq1069</b> | Bacteroidetes | Bacteroidia  |          |  |  |  |
| <b>seq1153</b> | Bacteroidetes | Bacteroidia  |          |  |  |  |
| <b>seq1410</b> | Bacteroidetes | Bacteroidia  |          |  |  |  |
| <b>seq1680</b> | Bacteroidetes | Bacteroidia  |          |  |  |  |
| <b>seq1039</b> | Bacteroidetes | Bacteroidia  |          |  |  |  |
| <b>seq254</b>  | Bacteroidetes | Bacteroidia  |          |  |  |  |
| <b>seq766</b>  | Bacteroidetes | Bacteroidia  |          |  |  |  |



Sequence Count Table

|                | <b>Phylum</b> | <b>Class</b> | <b>Order</b>  | <b>Family</b>      |
|----------------|---------------|--------------|---------------|--------------------|
| <b>seq1509</b> | Bacteroidetes | Bacteroidia  | Bacteroidales | Muribaculaceae     |
| <b>seq1891</b> | Bacteroidetes | Bacteroidia  | Bacteroidales | Muribaculaceae     |
| <b>seq1297</b> | Bacteroidetes | Bacteroidia  | Bacteroidales | Porphyromonadaceae |
| <b>seq1683</b> | Bacteroidetes | Bacteroidia  | Bacteroidales | Porphyromonadaceae |
| <b>seq1688</b> | Bacteroidetes | Bacteroidia  | Bacteroidales | Porphyromonadaceae |
| <b>seq1713</b> | Bacteroidetes | Bacteroidia  | Bacteroidales | Porphyromonadaceae |
| <b>seq1809</b> | Bacteroidetes | Bacteroidia  | Bacteroidales | Porphyromonadaceae |
| <b>seq1875</b> | Bacteroidetes | Bacteroidia  | Bacteroidales | Porphyromonadaceae |
| <b>seq1899</b> | Bacteroidetes | Bacteroidia  | Bacteroidales | Porphyromonadaceae |
| <b>seq177</b>  | Bacteroidetes | Bacteroidia  | Bacteroidales | Prevotellaceae     |
| <b>seq271</b>  | Bacteroidetes | Bacteroidia  | Bacteroidales | Prevotellaceae     |
| <b>seq935</b>  | Bacteroidetes | Bacteroidia  | Bacteroidales | Prevotellaceae     |
| <b>seq146</b>  | Bacteroidetes | Bacteroidia  | Bacteroidales | Prevotellaceae     |
| <b>seq231</b>  | Bacteroidetes | Bacteroidia  | Bacteroidales | Prevotellaceae     |
| <b>seq251</b>  | Bacteroidetes | Bacteroidia  | Bacteroidales | Prevotellaceae     |
| <b>seq366</b>  | Bacteroidetes | Bacteroidia  | Bacteroidales | Prevotellaceae     |
| <b>seq531</b>  | Bacteroidetes | Bacteroidia  | Bacteroidales | Prevotellaceae     |
| <b>seq563</b>  | Bacteroidetes | Bacteroidia  | Bacteroidales | Prevotellaceae     |
| <b>seq1338</b> | Bacteroidetes | Bacteroidia  | Bacteroidales | Prevotellaceae     |
| <b>seq1437</b> | Bacteroidetes | Bacteroidia  | Bacteroidales | Prevotellaceae     |
| <b>seq1629</b> | Bacteroidetes | Bacteroidia  | Bacteroidales | Prevotellaceae     |
| <b>seq1733</b> | Bacteroidetes | Bacteroidia  | Bacteroidales | Prevotellaceae     |
| <b>seq1789</b> | Bacteroidetes | Bacteroidia  | Bacteroidales | Prevotellaceae     |
| <b>seq79</b>   | Bacteroidetes | Bacteroidia  | Bacteroidales | Prevotellaceae     |
| <b>seq125</b>  | Bacteroidetes | Bacteroidia  | Bacteroidales | Prevotellaceae     |
| <b>seq265</b>  | Bacteroidetes | Bacteroidia  | Bacteroidales | Prevotellaceae     |
| <b>seq291</b>  | Bacteroidetes | Bacteroidia  | Bacteroidales | Prevotellaceae     |
| <b>seq342</b>  | Bacteroidetes | Bacteroidia  | Bacteroidales | Prevotellaceae     |
| <b>seq473</b>  | Bacteroidetes | Bacteroidia  | Bacteroidales | Prevotellaceae     |
| <b>seq487</b>  | Bacteroidetes | Bacteroidia  | Bacteroidales | Prevotellaceae     |
| <b>seq788</b>  | Bacteroidetes | Bacteroidia  | Bacteroidales | Prevotellaceae     |
| <b>seq1321</b> | Bacteroidetes | Bacteroidia  | Bacteroidales | Prevotellaceae     |

Sequence Count Table

|         | Phylum        | Class       | Genus          | Species  |
|---------|---------------|-------------|----------------|----------|
| seq1509 | Bacteroidetes | Bacteroidia |                |          |
| seq1891 | Bacteroidetes | Bacteroidia |                |          |
| seq1297 | Bacteroidetes | Bacteroidia | Porphyromonas  |          |
| seq1683 | Bacteroidetes | Bacteroidia | Porphyromonas  |          |
| seq1688 | Bacteroidetes | Bacteroidia | Porphyromonas  |          |
| seq1713 | Bacteroidetes | Bacteroidia | Porphyromonas  |          |
| seq1809 | Bacteroidetes | Bacteroidia | Porphyromonas  | somerae  |
| seq1875 | Bacteroidetes | Bacteroidia | Porphyromonas  | uenonis  |
| seq1899 | Bacteroidetes | Bacteroidia | Porphyromonas  |          |
| seq177  | Bacteroidetes | Bacteroidia | Alloprevotella |          |
| seq271  | Bacteroidetes | Bacteroidia | Alloprevotella |          |
| seq935  | Bacteroidetes | Bacteroidia | Alloprevotella |          |
| seq146  | Bacteroidetes | Bacteroidia | Paraprevotella |          |
| seq231  | Bacteroidetes | Bacteroidia | Paraprevotella |          |
| seq251  | Bacteroidetes | Bacteroidia | Paraprevotella |          |
| seq366  | Bacteroidetes | Bacteroidia | Paraprevotella |          |
| seq531  | Bacteroidetes | Bacteroidia | Paraprevotella |          |
| seq563  | Bacteroidetes | Bacteroidia | Prevotella     | disiens  |
| seq1338 | Bacteroidetes | Bacteroidia | Prevotella     | amni     |
| seq1437 | Bacteroidetes | Bacteroidia | Prevotella     |          |
| seq1629 | Bacteroidetes | Bacteroidia | Prevotella     | bivia    |
| seq1733 | Bacteroidetes | Bacteroidia | Prevotella     |          |
| seq1789 | Bacteroidetes | Bacteroidia | Prevotella     | buccalis |
| seq79   | Bacteroidetes | Bacteroidia | Prevotella_2   |          |
| seq125  | Bacteroidetes | Bacteroidia | Prevotella_2   |          |
| seq265  | Bacteroidetes | Bacteroidia | Prevotella_2   |          |
| seq291  | Bacteroidetes | Bacteroidia | Prevotella_2   |          |
| seq342  | Bacteroidetes | Bacteroidia | Prevotella_2   |          |
| seq473  | Bacteroidetes | Bacteroidia | Prevotella_2   |          |
| seq487  | Bacteroidetes | Bacteroidia | Prevotella_2   |          |
| seq788  | Bacteroidetes | Bacteroidia | Prevotella_2   |          |
| seq1321 | Bacteroidetes | Bacteroidia | Prevotella_6   | corporis |

Sequence Count Table

|                | <b>Phylum</b> | <b>Class</b> | <b>Subject34WK0</b> | <b>Subject34WK12</b> | <b>Subject16WK0</b> | <b>Subject16WK12</b> |
|----------------|---------------|--------------|---------------------|----------------------|---------------------|----------------------|
| <b>seq1509</b> | Bacteroidetes | Bacteroidia  | 0                   | 27                   | 0                   | 0                    |
| <b>seq1891</b> | Bacteroidetes | Bacteroidia  | 0                   | 0                    | 0                   | 0                    |
| <b>seq1297</b> | Bacteroidetes | Bacteroidia  | 0                   | 0                    | 0                   | 0                    |
| <b>seq1683</b> | Bacteroidetes | Bacteroidia  | 0                   | 0                    | 0                   | 0                    |
| <b>seq1688</b> | Bacteroidetes | Bacteroidia  | 0                   | 0                    | 0                   | 0                    |
| <b>seq1713</b> | Bacteroidetes | Bacteroidia  | 0                   | 0                    | 0                   | 0                    |
| <b>seq1809</b> | Bacteroidetes | Bacteroidia  | 0                   | 0                    | 0                   | 0                    |
| <b>seq1875</b> | Bacteroidetes | Bacteroidia  | 0                   | 0                    | 0                   | 0                    |
| <b>seq1899</b> | Bacteroidetes | Bacteroidia  | 0                   | 0                    | 0                   | 0                    |
| <b>seq177</b>  | Bacteroidetes | Bacteroidia  | 0                   | 0                    | 0                   | 0                    |
| <b>seq271</b>  | Bacteroidetes | Bacteroidia  | 0                   | 0                    | 0                   | 0                    |
| <b>seq935</b>  | Bacteroidetes | Bacteroidia  | 0                   | 0                    | 0                   | 0                    |
| <b>seq146</b>  | Bacteroidetes | Bacteroidia  | 0                   | 0                    | 151                 | 199                  |
| <b>seq231</b>  | Bacteroidetes | Bacteroidia  | 0                   | 0                    | 108                 | 176                  |
| <b>seq251</b>  | Bacteroidetes | Bacteroidia  | 0                   | 0                    | 0                   | 0                    |
| <b>seq366</b>  | Bacteroidetes | Bacteroidia  | 0                   | 0                    | 0                   | 0                    |
| <b>seq531</b>  | Bacteroidetes | Bacteroidia  | 0                   | 0                    | 0                   | 0                    |
| <b>seq563</b>  | Bacteroidetes | Bacteroidia  | 0                   | 0                    | 0                   | 0                    |
| <b>seq1338</b> | Bacteroidetes | Bacteroidia  | 0                   | 0                    | 0                   | 0                    |
| <b>seq1437</b> | Bacteroidetes | Bacteroidia  | 0                   | 0                    | 0                   | 0                    |
| <b>seq1629</b> | Bacteroidetes | Bacteroidia  | 0                   | 0                    | 0                   | 0                    |
| <b>seq1733</b> | Bacteroidetes | Bacteroidia  | 0                   | 0                    | 0                   | 0                    |
| <b>seq1789</b> | Bacteroidetes | Bacteroidia  | 0                   | 0                    | 0                   | 0                    |
| <b>seq79</b>   | Bacteroidetes | Bacteroidia  | 0                   | 0                    | 0                   | 0                    |
| <b>seq125</b>  | Bacteroidetes | Bacteroidia  | 0                   | 0                    | 0                   | 0                    |
| <b>seq265</b>  | Bacteroidetes | Bacteroidia  | 0                   | 0                    | 0                   | 0                    |
| <b>seq291</b>  | Bacteroidetes | Bacteroidia  | 0                   | 0                    | 0                   | 0                    |
| <b>seq342</b>  | Bacteroidetes | Bacteroidia  | 0                   | 0                    | 0                   | 0                    |
| <b>seq473</b>  | Bacteroidetes | Bacteroidia  | 0                   | 0                    | 0                   | 0                    |
| <b>seq487</b>  | Bacteroidetes | Bacteroidia  | 0                   | 0                    | 0                   | 0                    |
| <b>seq788</b>  | Bacteroidetes | Bacteroidia  | 0                   | 0                    | 0                   | 0                    |
| <b>seq1321</b> | Bacteroidetes | Bacteroidia  | 0                   | 0                    | 0                   | 31                   |

Sequence Count Table

|                | <b>Phylum</b> | <b>Class</b> | <b>Subject17WK0</b> | <b>Subject17WK12</b> | <b>Subject1WK0</b> | <b>Subject1WK12</b> |
|----------------|---------------|--------------|---------------------|----------------------|--------------------|---------------------|
| <b>seq1509</b> | Bacteroidetes | Bacteroidia  | 0                   | 0                    | 0                  | 0                   |
| <b>seq1891</b> | Bacteroidetes | Bacteroidia  | 0                   | 0                    | 0                  | 0                   |
| <b>seq1297</b> | Bacteroidetes | Bacteroidia  | 0                   | 0                    | 0                  | 0                   |
| <b>seq1683</b> | Bacteroidetes | Bacteroidia  | 0                   | 0                    | 0                  | 0                   |
| <b>seq1688</b> | Bacteroidetes | Bacteroidia  | 0                   | 0                    | 0                  | 0                   |
| <b>seq1713</b> | Bacteroidetes | Bacteroidia  | 0                   | 0                    | 0                  | 0                   |
| <b>seq1809</b> | Bacteroidetes | Bacteroidia  | 0                   | 0                    | 0                  | 0                   |
| <b>seq1875</b> | Bacteroidetes | Bacteroidia  | 4                   | 0                    | 0                  | 0                   |
| <b>seq1899</b> | Bacteroidetes | Bacteroidia  | 0                   | 0                    | 0                  | 0                   |
| <b>seq177</b>  | Bacteroidetes | Bacteroidia  | 0                   | 0                    | 0                  | 0                   |
| <b>seq271</b>  | Bacteroidetes | Bacteroidia  | 0                   | 0                    | 0                  | 0                   |
| <b>seq935</b>  | Bacteroidetes | Bacteroidia  | 0                   | 0                    | 0                  | 0                   |
| <b>seq146</b>  | Bacteroidetes | Bacteroidia  | 0                   | 0                    | 0                  | 0                   |
| <b>seq231</b>  | Bacteroidetes | Bacteroidia  | 0                   | 0                    | 0                  | 0                   |
| <b>seq251</b>  | Bacteroidetes | Bacteroidia  | 0                   | 0                    | 0                  | 0                   |
| <b>seq366</b>  | Bacteroidetes | Bacteroidia  | 0                   | 0                    | 0                  | 0                   |
| <b>seq531</b>  | Bacteroidetes | Bacteroidia  | 0                   | 0                    | 0                  | 0                   |
| <b>seq563</b>  | Bacteroidetes | Bacteroidia  | 0                   | 0                    | 0                  | 0                   |
| <b>seq1338</b> | Bacteroidetes | Bacteroidia  | 0                   | 0                    | 0                  | 0                   |
| <b>seq1437</b> | Bacteroidetes | Bacteroidia  | 0                   | 0                    | 0                  | 0                   |
| <b>seq1629</b> | Bacteroidetes | Bacteroidia  | 0                   | 0                    | 0                  | 0                   |
| <b>seq1733</b> | Bacteroidetes | Bacteroidia  | 0                   | 0                    | 0                  | 0                   |
| <b>seq1789</b> | Bacteroidetes | Bacteroidia  | 0                   | 0                    | 0                  | 0                   |
| <b>seq79</b>   | Bacteroidetes | Bacteroidia  | 0                   | 0                    | 0                  | 0                   |
| <b>seq125</b>  | Bacteroidetes | Bacteroidia  | 0                   | 0                    | 0                  | 0                   |
| <b>seq265</b>  | Bacteroidetes | Bacteroidia  | 0                   | 0                    | 0                  | 0                   |
| <b>seq291</b>  | Bacteroidetes | Bacteroidia  | 0                   | 0                    | 0                  | 0                   |
| <b>seq342</b>  | Bacteroidetes | Bacteroidia  | 0                   | 0                    | 0                  | 0                   |
| <b>seq473</b>  | Bacteroidetes | Bacteroidia  | 0                   | 0                    | 0                  | 0                   |
| <b>seq487</b>  | Bacteroidetes | Bacteroidia  | 0                   | 0                    | 0                  | 0                   |
| <b>seq788</b>  | Bacteroidetes | Bacteroidia  | 0                   | 0                    | 0                  | 0                   |
| <b>seq1321</b> | Bacteroidetes | Bacteroidia  | 0                   | 0                    | 0                  | 0                   |

Sequence Count Table

|                | <b>Phylum</b> | <b>Class</b> | <b>Subject2WK0</b> | <b>Subject2WK12</b> | <b>Subject3WK0</b> | <b>Subject3WK12</b> |
|----------------|---------------|--------------|--------------------|---------------------|--------------------|---------------------|
| <b>seq1509</b> | Bacteroidetes | Bacteroidia  | 0                  | 0                   | 0                  | 0                   |
| <b>seq1891</b> | Bacteroidetes | Bacteroidia  | 0                  | 0                   | 0                  | 0                   |
| <b>seq1297</b> | Bacteroidetes | Bacteroidia  | 0                  | 57                  | 0                  | 0                   |
| <b>seq1683</b> | Bacteroidetes | Bacteroidia  | 0                  | 0                   | 0                  | 0                   |
| <b>seq1688</b> | Bacteroidetes | Bacteroidia  | 0                  | 13                  | 0                  | 0                   |
| <b>seq1713</b> | Bacteroidetes | Bacteroidia  | 0                  | 0                   | 0                  | 0                   |
| <b>seq1809</b> | Bacteroidetes | Bacteroidia  | 0                  | 0                   | 0                  | 0                   |
| <b>seq1875</b> | Bacteroidetes | Bacteroidia  | 0                  | 0                   | 0                  | 0                   |
| <b>seq1899</b> | Bacteroidetes | Bacteroidia  | 0                  | 0                   | 0                  | 0                   |
| <b>seq177</b>  | Bacteroidetes | Bacteroidia  | 0                  | 0                   | 0                  | 0                   |
| <b>seq271</b>  | Bacteroidetes | Bacteroidia  | 0                  | 0                   | 0                  | 0                   |
| <b>seq935</b>  | Bacteroidetes | Bacteroidia  | 0                  | 0                   | 0                  | 0                   |
| <b>seq146</b>  | Bacteroidetes | Bacteroidia  | 0                  | 0                   | 0                  | 0                   |
| <b>seq231</b>  | Bacteroidetes | Bacteroidia  | 0                  | 0                   | 0                  | 0                   |
| <b>seq251</b>  | Bacteroidetes | Bacteroidia  | 0                  | 0                   | 0                  | 0                   |
| <b>seq366</b>  | Bacteroidetes | Bacteroidia  | 0                  | 0                   | 0                  | 0                   |
| <b>seq531</b>  | Bacteroidetes | Bacteroidia  | 0                  | 0                   | 0                  | 0                   |
| <b>seq563</b>  | Bacteroidetes | Bacteroidia  | 0                  | 11                  | 0                  | 0                   |
| <b>seq1338</b> | Bacteroidetes | Bacteroidia  | 0                  | 50                  | 0                  | 0                   |
| <b>seq1437</b> | Bacteroidetes | Bacteroidia  | 0                  | 36                  | 0                  | 0                   |
| <b>seq1629</b> | Bacteroidetes | Bacteroidia  | 0                  | 0                   | 0                  | 0                   |
| <b>seq1733</b> | Bacteroidetes | Bacteroidia  | 0                  | 0                   | 0                  | 0                   |
| <b>seq1789</b> | Bacteroidetes | Bacteroidia  | 0                  | 0                   | 0                  | 0                   |
| <b>seq79</b>   | Bacteroidetes | Bacteroidia  | 0                  | 0                   | 0                  | 0                   |
| <b>seq125</b>  | Bacteroidetes | Bacteroidia  | 0                  | 0                   | 0                  | 0                   |
| <b>seq265</b>  | Bacteroidetes | Bacteroidia  | 0                  | 0                   | 0                  | 0                   |
| <b>seq291</b>  | Bacteroidetes | Bacteroidia  | 0                  | 0                   | 0                  | 0                   |
| <b>seq342</b>  | Bacteroidetes | Bacteroidia  | 0                  | 0                   | 0                  | 0                   |
| <b>seq473</b>  | Bacteroidetes | Bacteroidia  | 0                  | 0                   | 0                  | 0                   |
| <b>seq487</b>  | Bacteroidetes | Bacteroidia  | 0                  | 0                   | 0                  | 0                   |
| <b>seq788</b>  | Bacteroidetes | Bacteroidia  | 0                  | 0                   | 0                  | 0                   |
| <b>seq1321</b> | Bacteroidetes | Bacteroidia  | 0                  | 0                   | 0                  | 0                   |

Sequence Count Table

|                | <b>Phylum</b> | <b>Class</b> | <b>Subject4WK0</b> | <b>Subject4WK12</b> | <b>Subject5WK0</b> | <b>Subject5WK12</b> |
|----------------|---------------|--------------|--------------------|---------------------|--------------------|---------------------|
| <b>seq1509</b> | Bacteroidetes | Bacteroidia  | 0                  | 0                   | 0                  | 0                   |
| <b>seq1891</b> | Bacteroidetes | Bacteroidia  | 0                  | 0                   | 0                  | 0                   |
| <b>seq1297</b> | Bacteroidetes | Bacteroidia  | 0                  | 0                   | 0                  | 0                   |
| <b>seq1683</b> | Bacteroidetes | Bacteroidia  | 0                  | 0                   | 0                  | 0                   |
| <b>seq1688</b> | Bacteroidetes | Bacteroidia  | 0                  | 0                   | 0                  | 0                   |
| <b>seq1713</b> | Bacteroidetes | Bacteroidia  | 0                  | 0                   | 0                  | 0                   |
| <b>seq1809</b> | Bacteroidetes | Bacteroidia  | 0                  | 0                   | 0                  | 5                   |
| <b>seq1875</b> | Bacteroidetes | Bacteroidia  | 0                  | 0                   | 0                  | 0                   |
| <b>seq1899</b> | Bacteroidetes | Bacteroidia  | 0                  | 0                   | 0                  | 0                   |
| <b>seq177</b>  | Bacteroidetes | Bacteroidia  | 0                  | 0                   | 0                  | 0                   |
| <b>seq271</b>  | Bacteroidetes | Bacteroidia  | 0                  | 0                   | 0                  | 0                   |
| <b>seq935</b>  | Bacteroidetes | Bacteroidia  | 0                  | 0                   | 0                  | 0                   |
| <b>seq146</b>  | Bacteroidetes | Bacteroidia  | 0                  | 0                   | 0                  | 0                   |
| <b>seq231</b>  | Bacteroidetes | Bacteroidia  | 0                  | 0                   | 0                  | 0                   |
| <b>seq251</b>  | Bacteroidetes | Bacteroidia  | 0                  | 0                   | 0                  | 0                   |
| <b>seq366</b>  | Bacteroidetes | Bacteroidia  | 0                  | 0                   | 0                  | 0                   |
| <b>seq531</b>  | Bacteroidetes | Bacteroidia  | 0                  | 0                   | 0                  | 0                   |
| <b>seq563</b>  | Bacteroidetes | Bacteroidia  | 0                  | 0                   | 135                | 460                 |
| <b>seq1338</b> | Bacteroidetes | Bacteroidia  | 0                  | 0                   | 0                  | 0                   |
| <b>seq1437</b> | Bacteroidetes | Bacteroidia  | 0                  | 0                   | 0                  | 0                   |
| <b>seq1629</b> | Bacteroidetes | Bacteroidia  | 0                  | 17                  | 0                  | 0                   |
| <b>seq1733</b> | Bacteroidetes | Bacteroidia  | 0                  | 0                   | 0                  | 0                   |
| <b>seq1789</b> | Bacteroidetes | Bacteroidia  | 0                  | 0                   | 0                  | 8                   |
| <b>seq79</b>   | Bacteroidetes | Bacteroidia  | 0                  | 0                   | 0                  | 0                   |
| <b>seq125</b>  | Bacteroidetes | Bacteroidia  | 0                  | 0                   | 0                  | 0                   |
| <b>seq265</b>  | Bacteroidetes | Bacteroidia  | 0                  | 0                   | 0                  | 0                   |
| <b>seq291</b>  | Bacteroidetes | Bacteroidia  | 0                  | 0                   | 0                  | 0                   |
| <b>seq342</b>  | Bacteroidetes | Bacteroidia  | 0                  | 0                   | 0                  | 0                   |
| <b>seq473</b>  | Bacteroidetes | Bacteroidia  | 0                  | 0                   | 0                  | 0                   |
| <b>seq487</b>  | Bacteroidetes | Bacteroidia  | 0                  | 0                   | 0                  | 0                   |
| <b>seq788</b>  | Bacteroidetes | Bacteroidia  | 0                  | 0                   | 0                  | 0                   |
| <b>seq1321</b> | Bacteroidetes | Bacteroidia  | 0                  | 0                   | 0                  | 21                  |

Sequence Count Table

|                | <b>Phylum</b> | <b>Class</b> | <b>Subject6WK0</b> | <b>Subject6WK12</b> | <b>Subject18WK0</b> | <b>Subject18WK12</b> |
|----------------|---------------|--------------|--------------------|---------------------|---------------------|----------------------|
| <b>seq1509</b> | Bacteroidetes | Bacteroidia  | 0                  | 0                   | 0                   | 0                    |
| <b>seq1891</b> | Bacteroidetes | Bacteroidia  | 0                  | 0                   | 0                   | 0                    |
| <b>seq1297</b> | Bacteroidetes | Bacteroidia  | 0                  | 0                   | 0                   | 0                    |
| <b>seq1683</b> | Bacteroidetes | Bacteroidia  | 0                  | 0                   | 0                   | 0                    |
| <b>seq1688</b> | Bacteroidetes | Bacteroidia  | 0                  | 0                   | 0                   | 0                    |
| <b>seq1713</b> | Bacteroidetes | Bacteroidia  | 0                  | 0                   | 0                   | 0                    |
| <b>seq1809</b> | Bacteroidetes | Bacteroidia  | 0                  | 0                   | 0                   | 0                    |
| <b>seq1875</b> | Bacteroidetes | Bacteroidia  | 0                  | 0                   | 0                   | 0                    |
| <b>seq1899</b> | Bacteroidetes | Bacteroidia  | 0                  | 0                   | 0                   | 0                    |
| <b>seq177</b>  | Bacteroidetes | Bacteroidia  | 0                  | 0                   | 0                   | 0                    |
| <b>seq271</b>  | Bacteroidetes | Bacteroidia  | 1702               | 1103                | 0                   | 0                    |
| <b>seq935</b>  | Bacteroidetes | Bacteroidia  | 0                  | 0                   | 0                   | 0                    |
| <b>seq146</b>  | Bacteroidetes | Bacteroidia  | 0                  | 0                   | 0                   | 0                    |
| <b>seq231</b>  | Bacteroidetes | Bacteroidia  | 0                  | 0                   | 0                   | 0                    |
| <b>seq251</b>  | Bacteroidetes | Bacteroidia  | 0                  | 0                   | 2427                | 817                  |
| <b>seq366</b>  | Bacteroidetes | Bacteroidia  | 0                  | 0                   | 1099                | 375                  |
| <b>seq531</b>  | Bacteroidetes | Bacteroidia  | 0                  | 0                   | 511                 | 181                  |
| <b>seq563</b>  | Bacteroidetes | Bacteroidia  | 0                  | 0                   | 0                   | 0                    |
| <b>seq1338</b> | Bacteroidetes | Bacteroidia  | 0                  | 0                   | 0                   | 0                    |
| <b>seq1437</b> | Bacteroidetes | Bacteroidia  | 0                  | 0                   | 0                   | 0                    |
| <b>seq1629</b> | Bacteroidetes | Bacteroidia  | 0                  | 0                   | 0                   | 0                    |
| <b>seq1733</b> | Bacteroidetes | Bacteroidia  | 0                  | 0                   | 0                   | 0                    |
| <b>seq1789</b> | Bacteroidetes | Bacteroidia  | 0                  | 0                   | 0                   | 0                    |
| <b>seq79</b>   | Bacteroidetes | Bacteroidia  | 0                  | 0                   | 0                   | 0                    |
| <b>seq125</b>  | Bacteroidetes | Bacteroidia  | 0                  | 0                   | 0                   | 0                    |
| <b>seq265</b>  | Bacteroidetes | Bacteroidia  | 0                  | 0                   | 0                   | 0                    |
| <b>seq291</b>  | Bacteroidetes | Bacteroidia  | 0                  | 0                   | 0                   | 0                    |
| <b>seq342</b>  | Bacteroidetes | Bacteroidia  | 0                  | 0                   | 0                   | 0                    |
| <b>seq473</b>  | Bacteroidetes | Bacteroidia  | 0                  | 0                   | 0                   | 0                    |
| <b>seq487</b>  | Bacteroidetes | Bacteroidia  | 0                  | 0                   | 0                   | 0                    |
| <b>seq788</b>  | Bacteroidetes | Bacteroidia  | 0                  | 0                   | 0                   | 0                    |
| <b>seq1321</b> | Bacteroidetes | Bacteroidia  | 0                  | 0                   | 0                   | 0                    |

Sequence Count Table

|                | <b>Phylum</b> | <b>Class</b> | <b>Subject19WK0</b> | <b>Subject19WK12</b> | <b>Subject20WK0</b> | <b>Subject20WK12</b> |
|----------------|---------------|--------------|---------------------|----------------------|---------------------|----------------------|
| <b>seq1509</b> | Bacteroidetes | Bacteroidia  | 0                   | 0                    | 0                   | 0                    |
| <b>seq1891</b> | Bacteroidetes | Bacteroidia  | 0                   | 0                    | 0                   | 0                    |
| <b>seq1297</b> | Bacteroidetes | Bacteroidia  | 0                   | 0                    | 0                   | 0                    |
| <b>seq1683</b> | Bacteroidetes | Bacteroidia  | 0                   | 0                    | 0                   | 0                    |
| <b>seq1688</b> | Bacteroidetes | Bacteroidia  | 0                   | 0                    | 0                   | 0                    |
| <b>seq1713</b> | Bacteroidetes | Bacteroidia  | 0                   | 0                    | 2                   | 0                    |
| <b>seq1809</b> | Bacteroidetes | Bacteroidia  | 0                   | 0                    | 0                   | 0                    |
| <b>seq1875</b> | Bacteroidetes | Bacteroidia  | 0                   | 0                    | 0                   | 0                    |
| <b>seq1899</b> | Bacteroidetes | Bacteroidia  | 0                   | 0                    | 2                   | 0                    |
| <b>seq177</b>  | Bacteroidetes | Bacteroidia  | 0                   | 0                    | 1396                | 5135                 |
| <b>seq271</b>  | Bacteroidetes | Bacteroidia  | 0                   | 0                    | 0                   | 0                    |
| <b>seq935</b>  | Bacteroidetes | Bacteroidia  | 0                   | 0                    | 0                   | 0                    |
| <b>seq146</b>  | Bacteroidetes | Bacteroidia  | 0                   | 0                    | 118                 | 137                  |
| <b>seq231</b>  | Bacteroidetes | Bacteroidia  | 0                   | 0                    | 18                  | 0                    |
| <b>seq251</b>  | Bacteroidetes | Bacteroidia  | 0                   | 0                    | 0                   | 0                    |
| <b>seq366</b>  | Bacteroidetes | Bacteroidia  | 0                   | 0                    | 0                   | 0                    |
| <b>seq531</b>  | Bacteroidetes | Bacteroidia  | 0                   | 0                    | 0                   | 0                    |
| <b>seq563</b>  | Bacteroidetes | Bacteroidia  | 0                   | 0                    | 8                   | 0                    |
| <b>seq1338</b> | Bacteroidetes | Bacteroidia  | 0                   | 0                    | 0                   | 0                    |
| <b>seq1437</b> | Bacteroidetes | Bacteroidia  | 0                   | 0                    | 0                   | 0                    |
| <b>seq1629</b> | Bacteroidetes | Bacteroidia  | 0                   | 0                    | 0                   | 0                    |
| <b>seq1733</b> | Bacteroidetes | Bacteroidia  | 0                   | 0                    | 0                   | 0                    |
| <b>seq1789</b> | Bacteroidetes | Bacteroidia  | 0                   | 0                    | 0                   | 0                    |
| <b>seq79</b>   | Bacteroidetes | Bacteroidia  | 0                   | 0                    | 7827                | 10693                |
| <b>seq125</b>  | Bacteroidetes | Bacteroidia  | 0                   | 0                    | 0                   | 0                    |
| <b>seq265</b>  | Bacteroidetes | Bacteroidia  | 0                   | 0                    | 456                 | 1073                 |
| <b>seq291</b>  | Bacteroidetes | Bacteroidia  | 0                   | 0                    | 1024                | 1408                 |
| <b>seq342</b>  | Bacteroidetes | Bacteroidia  | 0                   | 0                    | 0                   | 0                    |
| <b>seq473</b>  | Bacteroidetes | Bacteroidia  | 0                   | 0                    | 265                 | 547                  |
| <b>seq487</b>  | Bacteroidetes | Bacteroidia  | 0                   | 0                    | 0                   | 0                    |
| <b>seq788</b>  | Bacteroidetes | Bacteroidia  | 0                   | 0                    | 0                   | 0                    |
| <b>seq1321</b> | Bacteroidetes | Bacteroidia  | 0                   | 0                    | 0                   | 0                    |



Sequence Count Table

|                | <b>Phylum</b> | <b>Class</b> | <b>Subject7WK0</b> | <b>Subject7WK12</b> | <b>Subject21WK0</b> | <b>Subject21WK12</b> |
|----------------|---------------|--------------|--------------------|---------------------|---------------------|----------------------|
| <b>seq1509</b> | Bacteroidetes | Bacteroidia  | 0                  | 0                   | 0                   | 0                    |
| <b>seq1891</b> | Bacteroidetes | Bacteroidia  | 0                  | 0                   | 0                   | 0                    |
| <b>seq1297</b> | Bacteroidetes | Bacteroidia  | 0                  | 0                   | 0                   | 0                    |
| <b>seq1683</b> | Bacteroidetes | Bacteroidia  | 0                  | 0                   | 0                   | 0                    |
| <b>seq1688</b> | Bacteroidetes | Bacteroidia  | 0                  | 0                   | 0                   | 0                    |
| <b>seq1713</b> | Bacteroidetes | Bacteroidia  | 0                  | 0                   | 0                   | 0                    |
| <b>seq1809</b> | Bacteroidetes | Bacteroidia  | 0                  | 0                   | 0                   | 0                    |
| <b>seq1875</b> | Bacteroidetes | Bacteroidia  | 0                  | 0                   | 0                   | 0                    |
| <b>seq1899</b> | Bacteroidetes | Bacteroidia  | 0                  | 0                   | 0                   | 0                    |
| <b>seq177</b>  | Bacteroidetes | Bacteroidia  | 0                  | 0                   | 0                   | 0                    |
| <b>seq271</b>  | Bacteroidetes | Bacteroidia  | 0                  | 0                   | 0                   | 0                    |
| <b>seq935</b>  | Bacteroidetes | Bacteroidia  | 0                  | 0                   | 0                   | 0                    |
| <b>seq146</b>  | Bacteroidetes | Bacteroidia  | 1090               | 2703                | 0                   | 0                    |
| <b>seq231</b>  | Bacteroidetes | Bacteroidia  | 747                | 1996                | 0                   | 0                    |
| <b>seq251</b>  | Bacteroidetes | Bacteroidia  | 0                  | 0                   | 0                   | 0                    |
| <b>seq366</b>  | Bacteroidetes | Bacteroidia  | 0                  | 0                   | 0                   | 0                    |
| <b>seq531</b>  | Bacteroidetes | Bacteroidia  | 0                  | 0                   | 0                   | 0                    |
| <b>seq563</b>  | Bacteroidetes | Bacteroidia  | 0                  | 0                   | 0                   | 0                    |
| <b>seq1338</b> | Bacteroidetes | Bacteroidia  | 0                  | 0                   | 0                   | 0                    |
| <b>seq1437</b> | Bacteroidetes | Bacteroidia  | 0                  | 0                   | 0                   | 0                    |
| <b>seq1629</b> | Bacteroidetes | Bacteroidia  | 0                  | 0                   | 0                   | 0                    |
| <b>seq1733</b> | Bacteroidetes | Bacteroidia  | 0                  | 0                   | 0                   | 0                    |
| <b>seq1789</b> | Bacteroidetes | Bacteroidia  | 0                  | 0                   | 0                   | 0                    |
| <b>seq79</b>   | Bacteroidetes | Bacteroidia  | 0                  | 0                   | 0                   | 0                    |
| <b>seq125</b>  | Bacteroidetes | Bacteroidia  | 0                  | 0                   | 0                   | 0                    |
| <b>seq265</b>  | Bacteroidetes | Bacteroidia  | 0                  | 0                   | 0                   | 0                    |
| <b>seq291</b>  | Bacteroidetes | Bacteroidia  | 0                  | 0                   | 0                   | 0                    |
| <b>seq342</b>  | Bacteroidetes | Bacteroidia  | 0                  | 0                   | 0                   | 0                    |
| <b>seq473</b>  | Bacteroidetes | Bacteroidia  | 0                  | 0                   | 0                   | 0                    |
| <b>seq487</b>  | Bacteroidetes | Bacteroidia  | 0                  | 0                   | 0                   | 0                    |
| <b>seq788</b>  | Bacteroidetes | Bacteroidia  | 0                  | 0                   | 0                   | 0                    |
| <b>seq1321</b> | Bacteroidetes | Bacteroidia  | 0                  | 0                   | 0                   | 0                    |

Sequence Count Table

|                | <b>Phylum</b> | <b>Class</b> | <b>Subject8WK0</b> | <b>Subject8WK12</b> | <b>Subject9WK0</b> | <b>Subject9WK12</b> |
|----------------|---------------|--------------|--------------------|---------------------|--------------------|---------------------|
| <b>seq1509</b> | Bacteroidetes | Bacteroidia  | 0                  | 0                   | 0                  | 0                   |
| <b>seq1891</b> | Bacteroidetes | Bacteroidia  | 0                  | 0                   | 0                  | 0                   |
| <b>seq1297</b> | Bacteroidetes | Bacteroidia  | 0                  | 0                   | 0                  | 0                   |
| <b>seq1683</b> | Bacteroidetes | Bacteroidia  | 0                  | 0                   | 0                  | 0                   |
| <b>seq1688</b> | Bacteroidetes | Bacteroidia  | 0                  | 0                   | 0                  | 0                   |
| <b>seq1713</b> | Bacteroidetes | Bacteroidia  | 0                  | 0                   | 0                  | 0                   |
| <b>seq1809</b> | Bacteroidetes | Bacteroidia  | 0                  | 0                   | 0                  | 0                   |
| <b>seq1875</b> | Bacteroidetes | Bacteroidia  | 0                  | 0                   | 0                  | 0                   |
| <b>seq1899</b> | Bacteroidetes | Bacteroidia  | 0                  | 0                   | 0                  | 0                   |
| <b>seq177</b>  | Bacteroidetes | Bacteroidia  | 0                  | 0                   | 0                  | 0                   |
| <b>seq271</b>  | Bacteroidetes | Bacteroidia  | 0                  | 0                   | 0                  | 0                   |
| <b>seq935</b>  | Bacteroidetes | Bacteroidia  | 0                  | 0                   | 0                  | 0                   |
| <b>seq146</b>  | Bacteroidetes | Bacteroidia  | 0                  | 0                   | 0                  | 0                   |
| <b>seq231</b>  | Bacteroidetes | Bacteroidia  | 0                  | 0                   | 0                  | 0                   |
| <b>seq251</b>  | Bacteroidetes | Bacteroidia  | 0                  | 0                   | 0                  | 0                   |
| <b>seq366</b>  | Bacteroidetes | Bacteroidia  | 0                  | 0                   | 0                  | 0                   |
| <b>seq531</b>  | Bacteroidetes | Bacteroidia  | 0                  | 0                   | 0                  | 0                   |
| <b>seq563</b>  | Bacteroidetes | Bacteroidia  | 0                  | 0                   | 0                  | 0                   |
| <b>seq1338</b> | Bacteroidetes | Bacteroidia  | 0                  | 0                   | 0                  | 0                   |
| <b>seq1437</b> | Bacteroidetes | Bacteroidia  | 0                  | 0                   | 0                  | 0                   |
| <b>seq1629</b> | Bacteroidetes | Bacteroidia  | 0                  | 0                   | 0                  | 0                   |
| <b>seq1733</b> | Bacteroidetes | Bacteroidia  | 0                  | 0                   | 0                  | 0                   |
| <b>seq1789</b> | Bacteroidetes | Bacteroidia  | 0                  | 0                   | 0                  | 0                   |
| <b>seq79</b>   | Bacteroidetes | Bacteroidia  | 0                  | 0                   | 0                  | 0                   |
| <b>seq125</b>  | Bacteroidetes | Bacteroidia  | 0                  | 0                   | 0                  | 0                   |
| <b>seq265</b>  | Bacteroidetes | Bacteroidia  | 0                  | 0                   | 0                  | 0                   |
| <b>seq291</b>  | Bacteroidetes | Bacteroidia  | 0                  | 0                   | 0                  | 0                   |
| <b>seq342</b>  | Bacteroidetes | Bacteroidia  | 0                  | 0                   | 0                  | 0                   |
| <b>seq473</b>  | Bacteroidetes | Bacteroidia  | 0                  | 0                   | 0                  | 0                   |
| <b>seq487</b>  | Bacteroidetes | Bacteroidia  | 0                  | 0                   | 0                  | 0                   |
| <b>seq788</b>  | Bacteroidetes | Bacteroidia  | 0                  | 0                   | 0                  | 0                   |
| <b>seq1321</b> | Bacteroidetes | Bacteroidia  | 0                  | 0                   | 0                  | 0                   |

Sequence Count Table

|                | <b>Phylum</b> | <b>Class</b> | <b>Subject10WK0</b> | <b>Subject10WK12</b> | <b>Subject22WK0</b> | <b>Subject22WK12</b> |
|----------------|---------------|--------------|---------------------|----------------------|---------------------|----------------------|
| <b>seq1509</b> | Bacteroidetes | Bacteroidia  | 0                   | 0                    | 0                   | 0                    |
| <b>seq1891</b> | Bacteroidetes | Bacteroidia  | 0                   | 0                    | 0                   | 0                    |
| <b>seq1297</b> | Bacteroidetes | Bacteroidia  | 0                   | 0                    | 0                   | 0                    |
| <b>seq1683</b> | Bacteroidetes | Bacteroidia  | 0                   | 0                    | 0                   | 0                    |
| <b>seq1688</b> | Bacteroidetes | Bacteroidia  | 0                   | 0                    | 0                   | 0                    |
| <b>seq1713</b> | Bacteroidetes | Bacteroidia  | 0                   | 0                    | 0                   | 0                    |
| <b>seq1809</b> | Bacteroidetes | Bacteroidia  | 0                   | 0                    | 0                   | 0                    |
| <b>seq1875</b> | Bacteroidetes | Bacteroidia  | 0                   | 0                    | 0                   | 0                    |
| <b>seq1899</b> | Bacteroidetes | Bacteroidia  | 0                   | 0                    | 0                   | 0                    |
| <b>seq177</b>  | Bacteroidetes | Bacteroidia  | 0                   | 0                    | 0                   | 0                    |
| <b>seq271</b>  | Bacteroidetes | Bacteroidia  | 0                   | 0                    | 0                   | 0                    |
| <b>seq935</b>  | Bacteroidetes | Bacteroidia  | 0                   | 0                    | 73                  | 101                  |
| <b>seq146</b>  | Bacteroidetes | Bacteroidia  | 0                   | 0                    | 210                 | 105                  |
| <b>seq231</b>  | Bacteroidetes | Bacteroidia  | 0                   | 0                    | 95                  | 38                   |
| <b>seq251</b>  | Bacteroidetes | Bacteroidia  | 0                   | 0                    | 0                   | 0                    |
| <b>seq366</b>  | Bacteroidetes | Bacteroidia  | 0                   | 0                    | 0                   | 0                    |
| <b>seq531</b>  | Bacteroidetes | Bacteroidia  | 0                   | 0                    | 0                   | 0                    |
| <b>seq563</b>  | Bacteroidetes | Bacteroidia  | 0                   | 0                    | 0                   | 3                    |
| <b>seq1338</b> | Bacteroidetes | Bacteroidia  | 0                   | 0                    | 0                   | 0                    |
| <b>seq1437</b> | Bacteroidetes | Bacteroidia  | 0                   | 0                    | 0                   | 0                    |
| <b>seq1629</b> | Bacteroidetes | Bacteroidia  | 0                   | 0                    | 0                   | 0                    |
| <b>seq1733</b> | Bacteroidetes | Bacteroidia  | 0                   | 0                    | 0                   | 0                    |
| <b>seq1789</b> | Bacteroidetes | Bacteroidia  | 0                   | 0                    | 0                   | 0                    |
| <b>seq79</b>   | Bacteroidetes | Bacteroidia  | 0                   | 0                    | 0                   | 0                    |
| <b>seq125</b>  | Bacteroidetes | Bacteroidia  | 0                   | 0                    | 0                   | 0                    |
| <b>seq265</b>  | Bacteroidetes | Bacteroidia  | 0                   | 0                    | 0                   | 0                    |
| <b>seq291</b>  | Bacteroidetes | Bacteroidia  | 0                   | 0                    | 0                   | 0                    |
| <b>seq342</b>  | Bacteroidetes | Bacteroidia  | 0                   | 0                    | 0                   | 0                    |
| <b>seq473</b>  | Bacteroidetes | Bacteroidia  | 0                   | 0                    | 0                   | 45                   |
| <b>seq487</b>  | Bacteroidetes | Bacteroidia  | 0                   | 0                    | 0                   | 0                    |
| <b>seq788</b>  | Bacteroidetes | Bacteroidia  | 0                   | 0                    | 38                  | 245                  |
| <b>seq1321</b> | Bacteroidetes | Bacteroidia  | 0                   | 0                    | 0                   | 0                    |

Sequence Count Table

|                | <b>Phylum</b> | <b>Class</b> | <b>Subject23WK0</b> | <b>Subject23WK12</b> | <b>Subject24WK0</b> | <b>Subject24WK12</b> |
|----------------|---------------|--------------|---------------------|----------------------|---------------------|----------------------|
| <b>seq1509</b> | Bacteroidetes | Bacteroidia  | 0                   | 0                    | 0                   | 0                    |
| <b>seq1891</b> | Bacteroidetes | Bacteroidia  | 0                   | 0                    | 0                   | 0                    |
| <b>seq1297</b> | Bacteroidetes | Bacteroidia  | 0                   | 0                    | 0                   | 0                    |
| <b>seq1683</b> | Bacteroidetes | Bacteroidia  | 0                   | 0                    | 0                   | 0                    |
| <b>seq1688</b> | Bacteroidetes | Bacteroidia  | 0                   | 0                    | 0                   | 0                    |
| <b>seq1713</b> | Bacteroidetes | Bacteroidia  | 0                   | 0                    | 0                   | 0                    |
| <b>seq1809</b> | Bacteroidetes | Bacteroidia  | 0                   | 0                    | 0                   | 0                    |
| <b>seq1875</b> | Bacteroidetes | Bacteroidia  | 0                   | 0                    | 0                   | 0                    |
| <b>seq1899</b> | Bacteroidetes | Bacteroidia  | 0                   | 0                    | 0                   | 0                    |
| <b>seq177</b>  | Bacteroidetes | Bacteroidia  | 0                   | 0                    | 0                   | 0                    |
| <b>seq271</b>  | Bacteroidetes | Bacteroidia  | 0                   | 0                    | 0                   | 0                    |
| <b>seq935</b>  | Bacteroidetes | Bacteroidia  | 0                   | 0                    | 0                   | 0                    |
| <b>seq146</b>  | Bacteroidetes | Bacteroidia  | 0                   | 0                    | 0                   | 0                    |
| <b>seq231</b>  | Bacteroidetes | Bacteroidia  | 0                   | 0                    | 0                   | 0                    |
| <b>seq251</b>  | Bacteroidetes | Bacteroidia  | 0                   | 0                    | 0                   | 0                    |
| <b>seq366</b>  | Bacteroidetes | Bacteroidia  | 0                   | 0                    | 0                   | 0                    |
| <b>seq531</b>  | Bacteroidetes | Bacteroidia  | 0                   | 0                    | 0                   | 0                    |
| <b>seq563</b>  | Bacteroidetes | Bacteroidia  | 0                   | 0                    | 0                   | 0                    |
| <b>seq1338</b> | Bacteroidetes | Bacteroidia  | 0                   | 0                    | 0                   | 0                    |
| <b>seq1437</b> | Bacteroidetes | Bacteroidia  | 0                   | 0                    | 0                   | 0                    |
| <b>seq1629</b> | Bacteroidetes | Bacteroidia  | 0                   | 0                    | 0                   | 0                    |
| <b>seq1733</b> | Bacteroidetes | Bacteroidia  | 0                   | 0                    | 0                   | 0                    |
| <b>seq1789</b> | Bacteroidetes | Bacteroidia  | 0                   | 0                    | 0                   | 0                    |
| <b>seq79</b>   | Bacteroidetes | Bacteroidia  | 0                   | 0                    | 0                   | 0                    |
| <b>seq125</b>  | Bacteroidetes | Bacteroidia  | 0                   | 0                    | 0                   | 0                    |
| <b>seq265</b>  | Bacteroidetes | Bacteroidia  | 0                   | 0                    | 0                   | 0                    |
| <b>seq291</b>  | Bacteroidetes | Bacteroidia  | 0                   | 0                    | 0                   | 0                    |
| <b>seq342</b>  | Bacteroidetes | Bacteroidia  | 0                   | 0                    | 0                   | 0                    |
| <b>seq473</b>  | Bacteroidetes | Bacteroidia  | 0                   | 0                    | 0                   | 0                    |
| <b>seq487</b>  | Bacteroidetes | Bacteroidia  | 0                   | 0                    | 0                   | 0                    |
| <b>seq788</b>  | Bacteroidetes | Bacteroidia  | 0                   | 0                    | 0                   | 0                    |
| <b>seq1321</b> | Bacteroidetes | Bacteroidia  | 0                   | 0                    | 0                   | 0                    |

Sequence Count Table

|                | <b>Phylum</b> | <b>Class</b> | <b>Subject11WK0</b> | <b>Subject11WK12</b> | <b>Subject12WK0</b> | <b>Subject12WK12</b> |
|----------------|---------------|--------------|---------------------|----------------------|---------------------|----------------------|
| <b>seq1509</b> | Bacteroidetes | Bacteroidia  | 0                   | 0                    | 0                   | 0                    |
| <b>seq1891</b> | Bacteroidetes | Bacteroidia  | 0                   | 0                    | 0                   | 0                    |
| <b>seq1297</b> | Bacteroidetes | Bacteroidia  | 0                   | 0                    | 0                   | 0                    |
| <b>seq1683</b> | Bacteroidetes | Bacteroidia  | 0                   | 0                    | 0                   | 0                    |
| <b>seq1688</b> | Bacteroidetes | Bacteroidia  | 0                   | 0                    | 0                   | 0                    |
| <b>seq1713</b> | Bacteroidetes | Bacteroidia  | 0                   | 0                    | 0                   | 0                    |
| <b>seq1809</b> | Bacteroidetes | Bacteroidia  | 0                   | 0                    | 0                   | 0                    |
| <b>seq1875</b> | Bacteroidetes | Bacteroidia  | 0                   | 0                    | 0                   | 0                    |
| <b>seq1899</b> | Bacteroidetes | Bacteroidia  | 0                   | 0                    | 0                   | 0                    |
| <b>seq177</b>  | Bacteroidetes | Bacteroidia  | 0                   | 0                    | 0                   | 0                    |
| <b>seq271</b>  | Bacteroidetes | Bacteroidia  | 0                   | 0                    | 0                   | 0                    |
| <b>seq935</b>  | Bacteroidetes | Bacteroidia  | 0                   | 0                    | 0                   | 0                    |
| <b>seq146</b>  | Bacteroidetes | Bacteroidia  | 0                   | 0                    | 0                   | 0                    |
| <b>seq231</b>  | Bacteroidetes | Bacteroidia  | 0                   | 0                    | 0                   | 0                    |
| <b>seq251</b>  | Bacteroidetes | Bacteroidia  | 0                   | 0                    | 0                   | 0                    |
| <b>seq366</b>  | Bacteroidetes | Bacteroidia  | 0                   | 0                    | 0                   | 0                    |
| <b>seq531</b>  | Bacteroidetes | Bacteroidia  | 0                   | 0                    | 0                   | 0                    |
| <b>seq563</b>  | Bacteroidetes | Bacteroidia  | 0                   | 0                    | 0                   | 0                    |
| <b>seq1338</b> | Bacteroidetes | Bacteroidia  | 0                   | 0                    | 0                   | 0                    |
| <b>seq1437</b> | Bacteroidetes | Bacteroidia  | 0                   | 0                    | 0                   | 0                    |
| <b>seq1629</b> | Bacteroidetes | Bacteroidia  | 0                   | 0                    | 0                   | 0                    |
| <b>seq1733</b> | Bacteroidetes | Bacteroidia  | 0                   | 0                    | 0                   | 0                    |
| <b>seq1789</b> | Bacteroidetes | Bacteroidia  | 0                   | 0                    | 0                   | 0                    |
| <b>seq79</b>   | Bacteroidetes | Bacteroidia  | 0                   | 0                    | 0                   | 0                    |
| <b>seq125</b>  | Bacteroidetes | Bacteroidia  | 0                   | 0                    | 0                   | 0                    |
| <b>seq265</b>  | Bacteroidetes | Bacteroidia  | 0                   | 0                    | 0                   | 0                    |
| <b>seq291</b>  | Bacteroidetes | Bacteroidia  | 0                   | 0                    | 0                   | 0                    |
| <b>seq342</b>  | Bacteroidetes | Bacteroidia  | 0                   | 0                    | 0                   | 0                    |
| <b>seq473</b>  | Bacteroidetes | Bacteroidia  | 0                   | 0                    | 0                   | 0                    |
| <b>seq487</b>  | Bacteroidetes | Bacteroidia  | 0                   | 0                    | 0                   | 0                    |
| <b>seq788</b>  | Bacteroidetes | Bacteroidia  | 0                   | 0                    | 0                   | 0                    |
| <b>seq1321</b> | Bacteroidetes | Bacteroidia  | 0                   | 0                    | 0                   | 0                    |

Sequence Count Table

|                | <b>Phylum</b> | <b>Class</b> | <b>Subject25WK0</b> | <b>Subject25WK12</b> | <b>Subject38WK0</b> | <b>Subject38WK12</b> |
|----------------|---------------|--------------|---------------------|----------------------|---------------------|----------------------|
| <b>seq1509</b> | Bacteroidetes | Bacteroidia  | 0                   | 0                    | 0                   | 0                    |
| <b>seq1891</b> | Bacteroidetes | Bacteroidia  | 0                   | 0                    | 0                   | 0                    |
| <b>seq1297</b> | Bacteroidetes | Bacteroidia  | 0                   | 0                    | 0                   | 0                    |
| <b>seq1683</b> | Bacteroidetes | Bacteroidia  | 0                   | 14                   | 0                   | 0                    |
| <b>seq1688</b> | Bacteroidetes | Bacteroidia  | 0                   | 0                    | 0                   | 0                    |
| <b>seq1713</b> | Bacteroidetes | Bacteroidia  | 0                   | 10                   | 0                   | 0                    |
| <b>seq1809</b> | Bacteroidetes | Bacteroidia  | 0                   | 0                    | 0                   | 0                    |
| <b>seq1875</b> | Bacteroidetes | Bacteroidia  | 0                   | 0                    | 0                   | 0                    |
| <b>seq1899</b> | Bacteroidetes | Bacteroidia  | 0                   | 0                    | 0                   | 0                    |
| <b>seq177</b>  | Bacteroidetes | Bacteroidia  | 0                   | 0                    | 0                   | 0                    |
| <b>seq271</b>  | Bacteroidetes | Bacteroidia  | 0                   | 0                    | 0                   | 0                    |
| <b>seq935</b>  | Bacteroidetes | Bacteroidia  | 0                   | 0                    | 0                   | 0                    |
| <b>seq146</b>  | Bacteroidetes | Bacteroidia  | 0                   | 0                    | 0                   | 0                    |
| <b>seq231</b>  | Bacteroidetes | Bacteroidia  | 0                   | 0                    | 0                   | 0                    |
| <b>seq251</b>  | Bacteroidetes | Bacteroidia  | 0                   | 0                    | 0                   | 0                    |
| <b>seq366</b>  | Bacteroidetes | Bacteroidia  | 0                   | 0                    | 0                   | 0                    |
| <b>seq531</b>  | Bacteroidetes | Bacteroidia  | 0                   | 0                    | 0                   | 0                    |
| <b>seq563</b>  | Bacteroidetes | Bacteroidia  | 0                   | 0                    | 0                   | 0                    |
| <b>seq1338</b> | Bacteroidetes | Bacteroidia  | 0                   | 0                    | 0                   | 0                    |
| <b>seq1437</b> | Bacteroidetes | Bacteroidia  | 0                   | 0                    | 0                   | 0                    |
| <b>seq1629</b> | Bacteroidetes | Bacteroidia  | 0                   | 0                    | 0                   | 0                    |
| <b>seq1733</b> | Bacteroidetes | Bacteroidia  | 0                   | 11                   | 0                   | 0                    |
| <b>seq1789</b> | Bacteroidetes | Bacteroidia  | 0                   | 0                    | 0                   | 0                    |
| <b>seq79</b>   | Bacteroidetes | Bacteroidia  | 0                   | 0                    | 0                   | 0                    |
| <b>seq125</b>  | Bacteroidetes | Bacteroidia  | 0                   | 0                    | 0                   | 0                    |
| <b>seq265</b>  | Bacteroidetes | Bacteroidia  | 0                   | 0                    | 0                   | 0                    |
| <b>seq291</b>  | Bacteroidetes | Bacteroidia  | 0                   | 0                    | 0                   | 0                    |
| <b>seq342</b>  | Bacteroidetes | Bacteroidia  | 0                   | 0                    | 0                   | 0                    |
| <b>seq473</b>  | Bacteroidetes | Bacteroidia  | 0                   | 0                    | 0                   | 0                    |
| <b>seq487</b>  | Bacteroidetes | Bacteroidia  | 0                   | 0                    | 0                   | 0                    |
| <b>seq788</b>  | Bacteroidetes | Bacteroidia  | 0                   | 0                    | 0                   | 0                    |
| <b>seq1321</b> | Bacteroidetes | Bacteroidia  | 0                   | 0                    | 0                   | 0                    |

Sequence Count Table

|                | <b>Phylum</b> | <b>Class</b> | <b>Subject31WK0</b> | <b>Subject31WK12</b> | <b>Subject32WK0</b> | <b>Subject32WK12</b> |
|----------------|---------------|--------------|---------------------|----------------------|---------------------|----------------------|
| <b>seq1509</b> | Bacteroidetes | Bacteroidia  | 0                   | 0                    | 0                   | 0                    |
| <b>seq1891</b> | Bacteroidetes | Bacteroidia  | 0                   | 0                    | 0                   | 0                    |
| <b>seq1297</b> | Bacteroidetes | Bacteroidia  | 0                   | 0                    | 0                   | 0                    |
| <b>seq1683</b> | Bacteroidetes | Bacteroidia  | 0                   | 0                    | 0                   | 0                    |
| <b>seq1688</b> | Bacteroidetes | Bacteroidia  | 0                   | 0                    | 0                   | 0                    |
| <b>seq1713</b> | Bacteroidetes | Bacteroidia  | 0                   | 0                    | 0                   | 0                    |
| <b>seq1809</b> | Bacteroidetes | Bacteroidia  | 0                   | 0                    | 0                   | 0                    |
| <b>seq1875</b> | Bacteroidetes | Bacteroidia  | 0                   | 0                    | 0                   | 0                    |
| <b>seq1899</b> | Bacteroidetes | Bacteroidia  | 0                   | 0                    | 0                   | 0                    |
| <b>seq177</b>  | Bacteroidetes | Bacteroidia  | 0                   | 0                    | 0                   | 0                    |
| <b>seq271</b>  | Bacteroidetes | Bacteroidia  | 0                   | 0                    | 0                   | 0                    |
| <b>seq935</b>  | Bacteroidetes | Bacteroidia  | 0                   | 0                    | 0                   | 0                    |
| <b>seq146</b>  | Bacteroidetes | Bacteroidia  | 0                   | 0                    | 0                   | 0                    |
| <b>seq231</b>  | Bacteroidetes | Bacteroidia  | 0                   | 0                    | 0                   | 0                    |
| <b>seq251</b>  | Bacteroidetes | Bacteroidia  | 0                   | 0                    | 0                   | 0                    |
| <b>seq366</b>  | Bacteroidetes | Bacteroidia  | 0                   | 0                    | 0                   | 0                    |
| <b>seq531</b>  | Bacteroidetes | Bacteroidia  | 0                   | 0                    | 0                   | 0                    |
| <b>seq563</b>  | Bacteroidetes | Bacteroidia  | 0                   | 0                    | 0                   | 0                    |
| <b>seq1338</b> | Bacteroidetes | Bacteroidia  | 0                   | 0                    | 0                   | 0                    |
| <b>seq1437</b> | Bacteroidetes | Bacteroidia  | 0                   | 0                    | 0                   | 0                    |
| <b>seq1629</b> | Bacteroidetes | Bacteroidia  | 0                   | 0                    | 0                   | 0                    |
| <b>seq1733</b> | Bacteroidetes | Bacteroidia  | 0                   | 0                    | 0                   | 0                    |
| <b>seq1789</b> | Bacteroidetes | Bacteroidia  | 0                   | 0                    | 0                   | 0                    |
| <b>seq79</b>   | Bacteroidetes | Bacteroidia  | 0                   | 0                    | 0                   | 0                    |
| <b>seq125</b>  | Bacteroidetes | Bacteroidia  | 0                   | 0                    | 0                   | 0                    |
| <b>seq265</b>  | Bacteroidetes | Bacteroidia  | 0                   | 0                    | 0                   | 0                    |
| <b>seq291</b>  | Bacteroidetes | Bacteroidia  | 0                   | 0                    | 0                   | 0                    |
| <b>seq342</b>  | Bacteroidetes | Bacteroidia  | 0                   | 0                    | 0                   | 0                    |
| <b>seq473</b>  | Bacteroidetes | Bacteroidia  | 0                   | 0                    | 0                   | 0                    |
| <b>seq487</b>  | Bacteroidetes | Bacteroidia  | 0                   | 0                    | 0                   | 0                    |
| <b>seq788</b>  | Bacteroidetes | Bacteroidia  | 0                   | 0                    | 0                   | 0                    |
| <b>seq1321</b> | Bacteroidetes | Bacteroidia  | 0                   | 0                    | 0                   | 0                    |

Sequence Count Table

|                | <b>Phylum</b> | <b>Class</b> | <b>Subject13WK0</b> | <b>Subject13WK12</b> | <b>Subject39WK0</b> | <b>Subject39WK12</b> |
|----------------|---------------|--------------|---------------------|----------------------|---------------------|----------------------|
| <b>seq1509</b> | Bacteroidetes | Bacteroidia  | 0                   | 0                    | 0                   | 0                    |
| <b>seq1891</b> | Bacteroidetes | Bacteroidia  | 0                   | 0                    | 0                   | 3                    |
| <b>seq1297</b> | Bacteroidetes | Bacteroidia  | 0                   | 0                    | 0                   | 0                    |
| <b>seq1683</b> | Bacteroidetes | Bacteroidia  | 0                   | 0                    | 0                   | 0                    |
| <b>seq1688</b> | Bacteroidetes | Bacteroidia  | 0                   | 0                    | 0                   | 0                    |
| <b>seq1713</b> | Bacteroidetes | Bacteroidia  | 0                   | 0                    | 0                   | 0                    |
| <b>seq1809</b> | Bacteroidetes | Bacteroidia  | 0                   | 0                    | 0                   | 2                    |
| <b>seq1875</b> | Bacteroidetes | Bacteroidia  | 0                   | 0                    | 0                   | 0                    |
| <b>seq1899</b> | Bacteroidetes | Bacteroidia  | 0                   | 0                    | 0                   | 0                    |
| <b>seq177</b>  | Bacteroidetes | Bacteroidia  | 0                   | 0                    | 0                   | 0                    |
| <b>seq271</b>  | Bacteroidetes | Bacteroidia  | 0                   | 0                    | 0                   | 0                    |
| <b>seq935</b>  | Bacteroidetes | Bacteroidia  | 0                   | 0                    | 0                   | 0                    |
| <b>seq146</b>  | Bacteroidetes | Bacteroidia  | 0                   | 0                    | 0                   | 0                    |
| <b>seq231</b>  | Bacteroidetes | Bacteroidia  | 0                   | 0                    | 0                   | 0                    |
| <b>seq251</b>  | Bacteroidetes | Bacteroidia  | 0                   | 0                    | 0                   | 0                    |
| <b>seq366</b>  | Bacteroidetes | Bacteroidia  | 0                   | 0                    | 0                   | 0                    |
| <b>seq531</b>  | Bacteroidetes | Bacteroidia  | 0                   | 0                    | 0                   | 0                    |
| <b>seq563</b>  | Bacteroidetes | Bacteroidia  | 0                   | 0                    | 0                   | 0                    |
| <b>seq1338</b> | Bacteroidetes | Bacteroidia  | 0                   | 0                    | 0                   | 0                    |
| <b>seq1437</b> | Bacteroidetes | Bacteroidia  | 0                   | 0                    | 0                   | 0                    |
| <b>seq1629</b> | Bacteroidetes | Bacteroidia  | 0                   | 0                    | 0                   | 0                    |
| <b>seq1733</b> | Bacteroidetes | Bacteroidia  | 0                   | 0                    | 0                   | 0                    |
| <b>seq1789</b> | Bacteroidetes | Bacteroidia  | 0                   | 0                    | 0                   | 0                    |
| <b>seq79</b>   | Bacteroidetes | Bacteroidia  | 0                   | 0                    | 0                   | 0                    |
| <b>seq125</b>  | Bacteroidetes | Bacteroidia  | 0                   | 0                    | 0                   | 0                    |
| <b>seq265</b>  | Bacteroidetes | Bacteroidia  | 0                   | 0                    | 0                   | 1399                 |
| <b>seq291</b>  | Bacteroidetes | Bacteroidia  | 0                   | 0                    | 0                   | 0                    |
| <b>seq342</b>  | Bacteroidetes | Bacteroidia  | 0                   | 0                    | 0                   | 0                    |
| <b>seq473</b>  | Bacteroidetes | Bacteroidia  | 0                   | 0                    | 0                   | 0                    |
| <b>seq487</b>  | Bacteroidetes | Bacteroidia  | 0                   | 0                    | 0                   | 812                  |
| <b>seq788</b>  | Bacteroidetes | Bacteroidia  | 0                   | 0                    | 0                   | 0                    |
| <b>seq1321</b> | Bacteroidetes | Bacteroidia  | 0                   | 0                    | 0                   | 0                    |



Sequence Count Table

|                | <b>Phylum</b> | <b>Class</b> | <b>Subject26WK0</b> | <b>Subject26WK12</b> | <b>Subject14WK0</b> | <b>Subject14WK12</b> |
|----------------|---------------|--------------|---------------------|----------------------|---------------------|----------------------|
| <b>seq1509</b> | Bacteroidetes | Bacteroidia  | 0                   | 0                    | 0                   | 0                    |
| <b>seq1891</b> | Bacteroidetes | Bacteroidia  | 0                   | 0                    | 0                   | 0                    |
| <b>seq1297</b> | Bacteroidetes | Bacteroidia  | 0                   | 0                    | 0                   | 0                    |
| <b>seq1683</b> | Bacteroidetes | Bacteroidia  | 0                   | 0                    | 0                   | 0                    |
| <b>seq1688</b> | Bacteroidetes | Bacteroidia  | 0                   | 0                    | 0                   | 0                    |
| <b>seq1713</b> | Bacteroidetes | Bacteroidia  | 0                   | 0                    | 0                   | 0                    |
| <b>seq1809</b> | Bacteroidetes | Bacteroidia  | 0                   | 0                    | 0                   | 0                    |
| <b>seq1875</b> | Bacteroidetes | Bacteroidia  | 0                   | 0                    | 0                   | 0                    |
| <b>seq1899</b> | Bacteroidetes | Bacteroidia  | 0                   | 0                    | 0                   | 0                    |
| <b>seq177</b>  | Bacteroidetes | Bacteroidia  | 0                   | 0                    | 0                   | 0                    |
| <b>seq271</b>  | Bacteroidetes | Bacteroidia  | 0                   | 0                    | 0                   | 0                    |
| <b>seq935</b>  | Bacteroidetes | Bacteroidia  | 0                   | 0                    | 0                   | 0                    |
| <b>seq146</b>  | Bacteroidetes | Bacteroidia  | 0                   | 0                    | 1470                | 339                  |
| <b>seq231</b>  | Bacteroidetes | Bacteroidia  | 0                   | 0                    | 238                 | 44                   |
| <b>seq251</b>  | Bacteroidetes | Bacteroidia  | 0                   | 0                    | 0                   | 0                    |
| <b>seq366</b>  | Bacteroidetes | Bacteroidia  | 0                   | 0                    | 0                   | 0                    |
| <b>seq531</b>  | Bacteroidetes | Bacteroidia  | 0                   | 0                    | 0                   | 0                    |
| <b>seq563</b>  | Bacteroidetes | Bacteroidia  | 0                   | 0                    | 0                   | 0                    |
| <b>seq1338</b> | Bacteroidetes | Bacteroidia  | 0                   | 0                    | 0                   | 0                    |
| <b>seq1437</b> | Bacteroidetes | Bacteroidia  | 0                   | 0                    | 0                   | 0                    |
| <b>seq1629</b> | Bacteroidetes | Bacteroidia  | 0                   | 0                    | 0                   | 0                    |
| <b>seq1733</b> | Bacteroidetes | Bacteroidia  | 0                   | 0                    | 0                   | 0                    |
| <b>seq1789</b> | Bacteroidetes | Bacteroidia  | 0                   | 0                    | 0                   | 0                    |
| <b>seq79</b>   | Bacteroidetes | Bacteroidia  | 0                   | 0                    | 0                   | 0                    |
| <b>seq125</b>  | Bacteroidetes | Bacteroidia  | 0                   | 0                    | 0                   | 0                    |
| <b>seq265</b>  | Bacteroidetes | Bacteroidia  | 0                   | 0                    | 0                   | 0                    |
| <b>seq291</b>  | Bacteroidetes | Bacteroidia  | 0                   | 0                    | 0                   | 0                    |
| <b>seq342</b>  | Bacteroidetes | Bacteroidia  | 0                   | 0                    | 0                   | 0                    |
| <b>seq473</b>  | Bacteroidetes | Bacteroidia  | 0                   | 0                    | 0                   | 0                    |
| <b>seq487</b>  | Bacteroidetes | Bacteroidia  | 0                   | 0                    | 0                   | 0                    |
| <b>seq788</b>  | Bacteroidetes | Bacteroidia  | 0                   | 0                    | 0                   | 0                    |
| <b>seq1321</b> | Bacteroidetes | Bacteroidia  | 0                   | 0                    | 0                   | 0                    |

Sequence Count Table

|                | <b>Phylum</b> | <b>Class</b> | <b>Subject27WK0</b> | <b>Subject27WK12</b> | <b>Subject15WK0</b> | <b>Subject15WK12</b> |
|----------------|---------------|--------------|---------------------|----------------------|---------------------|----------------------|
| <b>seq1509</b> | Bacteroidetes | Bacteroidia  | 0                   | 0                    | 0                   | 0                    |
| <b>seq1891</b> | Bacteroidetes | Bacteroidia  | 0                   | 0                    | 0                   | 0                    |
| <b>seq1297</b> | Bacteroidetes | Bacteroidia  | 0                   | 0                    | 0                   | 0                    |
| <b>seq1683</b> | Bacteroidetes | Bacteroidia  | 0                   | 0                    | 0                   | 0                    |
| <b>seq1688</b> | Bacteroidetes | Bacteroidia  | 0                   | 0                    | 0                   | 0                    |
| <b>seq1713</b> | Bacteroidetes | Bacteroidia  | 0                   | 0                    | 0                   | 0                    |
| <b>seq1809</b> | Bacteroidetes | Bacteroidia  | 0                   | 0                    | 0                   | 0                    |
| <b>seq1875</b> | Bacteroidetes | Bacteroidia  | 0                   | 0                    | 0                   | 0                    |
| <b>seq1899</b> | Bacteroidetes | Bacteroidia  | 0                   | 0                    | 0                   | 0                    |
| <b>seq177</b>  | Bacteroidetes | Bacteroidia  | 0                   | 0                    | 0                   | 0                    |
| <b>seq271</b>  | Bacteroidetes | Bacteroidia  | 0                   | 0                    | 0                   | 0                    |
| <b>seq935</b>  | Bacteroidetes | Bacteroidia  | 0                   | 0                    | 0                   | 0                    |
| <b>seq146</b>  | Bacteroidetes | Bacteroidia  | 603                 | 407                  | 973                 | 435                  |
| <b>seq231</b>  | Bacteroidetes | Bacteroidia  | 100                 | 66                   | 164                 | 82                   |
| <b>seq251</b>  | Bacteroidetes | Bacteroidia  | 0                   | 0                    | 0                   | 0                    |
| <b>seq366</b>  | Bacteroidetes | Bacteroidia  | 0                   | 0                    | 0                   | 0                    |
| <b>seq531</b>  | Bacteroidetes | Bacteroidia  | 0                   | 0                    | 0                   | 0                    |
| <b>seq563</b>  | Bacteroidetes | Bacteroidia  | 0                   | 0                    | 0                   | 0                    |
| <b>seq1338</b> | Bacteroidetes | Bacteroidia  | 0                   | 0                    | 0                   | 0                    |
| <b>seq1437</b> | Bacteroidetes | Bacteroidia  | 0                   | 0                    | 0                   | 0                    |
| <b>seq1629</b> | Bacteroidetes | Bacteroidia  | 0                   | 0                    | 0                   | 0                    |
| <b>seq1733</b> | Bacteroidetes | Bacteroidia  | 0                   | 0                    | 0                   | 0                    |
| <b>seq1789</b> | Bacteroidetes | Bacteroidia  | 0                   | 0                    | 0                   | 0                    |
| <b>seq79</b>   | Bacteroidetes | Bacteroidia  | 0                   | 0                    | 0                   | 0                    |
| <b>seq125</b>  | Bacteroidetes | Bacteroidia  | 2570                | 8430                 | 0                   | 0                    |
| <b>seq265</b>  | Bacteroidetes | Bacteroidia  | 0                   | 0                    | 0                   | 0                    |
| <b>seq291</b>  | Bacteroidetes | Bacteroidia  | 0                   | 0                    | 0                   | 0                    |
| <b>seq342</b>  | Bacteroidetes | Bacteroidia  | 456                 | 1238                 | 0                   | 0                    |
| <b>seq473</b>  | Bacteroidetes | Bacteroidia  | 0                   | 0                    | 0                   | 0                    |
| <b>seq487</b>  | Bacteroidetes | Bacteroidia  | 0                   | 0                    | 0                   | 0                    |
| <b>seq788</b>  | Bacteroidetes | Bacteroidia  | 0                   | 0                    | 0                   | 0                    |
| <b>seq1321</b> | Bacteroidetes | Bacteroidia  | 0                   | 0                    | 0                   | 0                    |

Sequence Count Table

|                | <b>Phylum</b> | <b>Class</b> | <b>Δ</b> |  |  |  |
|----------------|---------------|--------------|----------|--|--|--|
| <b>seq1509</b> | Bacteroidetes | Bacteroidia  |          |  |  |  |
| <b>seq1891</b> | Bacteroidetes | Bacteroidia  |          |  |  |  |
| <b>seq1297</b> | Bacteroidetes | Bacteroidia  |          |  |  |  |
| <b>seq1683</b> | Bacteroidetes | Bacteroidia  |          |  |  |  |
| <b>seq1688</b> | Bacteroidetes | Bacteroidia  |          |  |  |  |
| <b>seq1713</b> | Bacteroidetes | Bacteroidia  |          |  |  |  |
| <b>seq1809</b> | Bacteroidetes | Bacteroidia  |          |  |  |  |
| <b>seq1875</b> | Bacteroidetes | Bacteroidia  |          |  |  |  |
| <b>seq1899</b> | Bacteroidetes | Bacteroidia  |          |  |  |  |
| <b>seq177</b>  | Bacteroidetes | Bacteroidia  |          |  |  |  |
| <b>seq271</b>  | Bacteroidetes | Bacteroidia  |          |  |  |  |
| <b>seq935</b>  | Bacteroidetes | Bacteroidia  |          |  |  |  |
| <b>seq146</b>  | Bacteroidetes | Bacteroidia  |          |  |  |  |
| <b>seq231</b>  | Bacteroidetes | Bacteroidia  |          |  |  |  |
| <b>seq251</b>  | Bacteroidetes | Bacteroidia  |          |  |  |  |
| <b>seq366</b>  | Bacteroidetes | Bacteroidia  |          |  |  |  |
| <b>seq531</b>  | Bacteroidetes | Bacteroidia  |          |  |  |  |
| <b>seq563</b>  | Bacteroidetes | Bacteroidia  |          |  |  |  |
| <b>seq1338</b> | Bacteroidetes | Bacteroidia  |          |  |  |  |
| <b>seq1437</b> | Bacteroidetes | Bacteroidia  |          |  |  |  |
| <b>seq1629</b> | Bacteroidetes | Bacteroidia  |          |  |  |  |
| <b>seq1733</b> | Bacteroidetes | Bacteroidia  |          |  |  |  |
| <b>seq1789</b> | Bacteroidetes | Bacteroidia  |          |  |  |  |
| <b>seq79</b>   | Bacteroidetes | Bacteroidia  |          |  |  |  |
| <b>seq125</b>  | Bacteroidetes | Bacteroidia  |          |  |  |  |
| <b>seq265</b>  | Bacteroidetes | Bacteroidia  |          |  |  |  |
| <b>seq291</b>  | Bacteroidetes | Bacteroidia  |          |  |  |  |
| <b>seq342</b>  | Bacteroidetes | Bacteroidia  |          |  |  |  |
| <b>seq473</b>  | Bacteroidetes | Bacteroidia  |          |  |  |  |
| <b>seq487</b>  | Bacteroidetes | Bacteroidia  |          |  |  |  |
| <b>seq788</b>  | Bacteroidetes | Bacteroidia  |          |  |  |  |
| <b>seq1321</b> | Bacteroidetes | Bacteroidia  |          |  |  |  |

Sequence Count Table

|                | <b>Phylum</b> | <b>Class</b> | <b>Order</b>  | <b>Family</b>  |
|----------------|---------------|--------------|---------------|----------------|
| <b>seq220</b>  | Bacteroidetes | Bacteroidia  | Bacteroidales | Prevotellaceae |
| <b>seq16</b>   | Bacteroidetes | Bacteroidia  | Bacteroidales | Prevotellaceae |
| <b>seq31</b>   | Bacteroidetes | Bacteroidia  | Bacteroidales | Prevotellaceae |
| <b>seq108</b>  | Bacteroidetes | Bacteroidia  | Bacteroidales | Prevotellaceae |
| <b>seq160</b>  | Bacteroidetes | Bacteroidia  | Bacteroidales | Prevotellaceae |
| <b>seq347</b>  | Bacteroidetes | Bacteroidia  | Bacteroidales | Prevotellaceae |
| <b>seq355</b>  | Bacteroidetes | Bacteroidia  | Bacteroidales | Prevotellaceae |
| <b>seq380</b>  | Bacteroidetes | Bacteroidia  | Bacteroidales | Prevotellaceae |
| <b>seq469</b>  | Bacteroidetes | Bacteroidia  | Bacteroidales | Prevotellaceae |
| <b>seq957</b>  | Bacteroidetes | Bacteroidia  | Bacteroidales | Prevotellaceae |
| <b>seq280</b>  | Bacteroidetes | Bacteroidia  | Bacteroidales | Prevotellaceae |
| <b>seq245</b>  | Bacteroidetes | Bacteroidia  | Bacteroidales | Prevotellaceae |
| <b>seq562</b>  | Bacteroidetes | Bacteroidia  | Bacteroidales | Prevotellaceae |
| <b>seq43</b>   | Bacteroidetes | Bacteroidia  | Bacteroidales | Rikenellaceae  |
| <b>seq67</b>   | Bacteroidetes | Bacteroidia  | Bacteroidales | Rikenellaceae  |
| <b>seq115</b>  | Bacteroidetes | Bacteroidia  | Bacteroidales | Rikenellaceae  |
| <b>seq140</b>  | Bacteroidetes | Bacteroidia  | Bacteroidales | Rikenellaceae  |
| <b>seq154</b>  | Bacteroidetes | Bacteroidia  | Bacteroidales | Rikenellaceae  |
| <b>seq156</b>  | Bacteroidetes | Bacteroidia  | Bacteroidales | Rikenellaceae  |
| <b>seq285</b>  | Bacteroidetes | Bacteroidia  | Bacteroidales | Rikenellaceae  |
| <b>seq336</b>  | Bacteroidetes | Bacteroidia  | Bacteroidales | Rikenellaceae  |
| <b>seq374</b>  | Bacteroidetes | Bacteroidia  | Bacteroidales | Rikenellaceae  |
| <b>seq378</b>  | Bacteroidetes | Bacteroidia  | Bacteroidales | Rikenellaceae  |
| <b>seq388</b>  | Bacteroidetes | Bacteroidia  | Bacteroidales | Rikenellaceae  |
| <b>seq406</b>  | Bacteroidetes | Bacteroidia  | Bacteroidales | Rikenellaceae  |
| <b>seq435</b>  | Bacteroidetes | Bacteroidia  | Bacteroidales | Rikenellaceae  |
| <b>seq718</b>  | Bacteroidetes | Bacteroidia  | Bacteroidales | Rikenellaceae  |
| <b>seq725</b>  | Bacteroidetes | Bacteroidia  | Bacteroidales | Rikenellaceae  |
| <b>seq815</b>  | Bacteroidetes | Bacteroidia  | Bacteroidales | Rikenellaceae  |
| <b>seq1109</b> | Bacteroidetes | Bacteroidia  | Bacteroidales | Rikenellaceae  |
| <b>seq1223</b> | Bacteroidetes | Bacteroidia  | Bacteroidales | Rikenellaceae  |
| <b>seq1233</b> | Bacteroidetes | Bacteroidia  | Bacteroidales | Rikenellaceae  |

Sequence Count Table

|                | <b>Phylum</b> | <b>Class</b> | <b>Genus</b>           | <b>Species</b> |
|----------------|---------------|--------------|------------------------|----------------|
| <b>seq220</b>  | Bacteroidetes | Bacteroidia  | Prevotella_7           |                |
| <b>seq16</b>   | Bacteroidetes | Bacteroidia  | Prevotella_9           | copri          |
| <b>seq31</b>   | Bacteroidetes | Bacteroidia  | Prevotella_9           |                |
| <b>seq108</b>  | Bacteroidetes | Bacteroidia  | Prevotella_9           |                |
| <b>seq160</b>  | Bacteroidetes | Bacteroidia  | Prevotella_9           |                |
| <b>seq347</b>  | Bacteroidetes | Bacteroidia  | Prevotella_9           |                |
| <b>seq355</b>  | Bacteroidetes | Bacteroidia  | Prevotella_9           |                |
| <b>seq380</b>  | Bacteroidetes | Bacteroidia  | Prevotella_9           |                |
| <b>seq469</b>  | Bacteroidetes | Bacteroidia  | Prevotella_9           |                |
| <b>seq957</b>  | Bacteroidetes | Bacteroidia  | Prevotella_9           |                |
| <b>seq280</b>  | Bacteroidetes | Bacteroidia  | Prevotellaceae_UCG-003 |                |
| <b>seq245</b>  | Bacteroidetes | Bacteroidia  |                        |                |
| <b>seq562</b>  | Bacteroidetes | Bacteroidia  |                        |                |
| <b>seq43</b>   | Bacteroidetes | Bacteroidia  | Alistipes              | putredinis     |
| <b>seq67</b>   | Bacteroidetes | Bacteroidia  | Alistipes              | finegoldii     |
| <b>seq115</b>  | Bacteroidetes | Bacteroidia  | Alistipes              |                |
| <b>seq140</b>  | Bacteroidetes | Bacteroidia  | Alistipes              |                |
| <b>seq154</b>  | Bacteroidetes | Bacteroidia  | Alistipes              | shahii         |
| <b>seq156</b>  | Bacteroidetes | Bacteroidia  | Alistipes              |                |
| <b>seq285</b>  | Bacteroidetes | Bacteroidia  | Alistipes              | obesi          |
| <b>seq336</b>  | Bacteroidetes | Bacteroidia  | Alistipes              |                |
| <b>seq374</b>  | Bacteroidetes | Bacteroidia  | Alistipes              |                |
| <b>seq378</b>  | Bacteroidetes | Bacteroidia  | Alistipes              |                |
| <b>seq388</b>  | Bacteroidetes | Bacteroidia  | Alistipes              | shahii         |
| <b>seq406</b>  | Bacteroidetes | Bacteroidia  | Alistipes              | indistinctus   |
| <b>seq435</b>  | Bacteroidetes | Bacteroidia  | Alistipes              |                |
| <b>seq718</b>  | Bacteroidetes | Bacteroidia  | Alistipes              | ihumii         |
| <b>seq725</b>  | Bacteroidetes | Bacteroidia  | Alistipes              | massiliensis   |
| <b>seq815</b>  | Bacteroidetes | Bacteroidia  | Alistipes              |                |
| <b>seq1109</b> | Bacteroidetes | Bacteroidia  | Alistipes              |                |
| <b>seq1223</b> | Bacteroidetes | Bacteroidia  | Alistipes              |                |
| <b>seq1233</b> | Bacteroidetes | Bacteroidia  | Alistipes              | inops          |

Sequence Count Table

|                | <b>Phylum</b> | <b>Class</b> | <b>Subject34WK0</b> | <b>Subject34WK12</b> | <b>Subject16WK0</b> | <b>Subject16WK12</b> |
|----------------|---------------|--------------|---------------------|----------------------|---------------------|----------------------|
| <b>seq220</b>  | Bacteroidetes | Bacteroidia  | 0                   | 0                    | 1612                | 787                  |
| <b>seq16</b>   | Bacteroidetes | Bacteroidia  | 0                   | 0                    | 49635               | 29993                |
| <b>seq31</b>   | Bacteroidetes | Bacteroidia  | 0                   | 0                    | 13539               | 6335                 |
| <b>seq108</b>  | Bacteroidetes | Bacteroidia  | 0                   | 0                    | 1792                | 958                  |
| <b>seq160</b>  | Bacteroidetes | Bacteroidia  | 0                   | 0                    | 0                   | 0                    |
| <b>seq347</b>  | Bacteroidetes | Bacteroidia  | 0                   | 0                    | 0                   | 0                    |
| <b>seq355</b>  | Bacteroidetes | Bacteroidia  | 0                   | 0                    | 0                   | 0                    |
| <b>seq380</b>  | Bacteroidetes | Bacteroidia  | 0                   | 0                    | 0                   | 0                    |
| <b>seq469</b>  | Bacteroidetes | Bacteroidia  | 0                   | 0                    | 0                   | 0                    |
| <b>seq957</b>  | Bacteroidetes | Bacteroidia  | 0                   | 0                    | 0                   | 0                    |
| <b>seq280</b>  | Bacteroidetes | Bacteroidia  | 0                   | 0                    | 0                   | 0                    |
| <b>seq245</b>  | Bacteroidetes | Bacteroidia  | 0                   | 0                    | 0                   | 0                    |
| <b>seq562</b>  | Bacteroidetes | Bacteroidia  | 0                   | 0                    | 0                   | 0                    |
| <b>seq43</b>   | Bacteroidetes | Bacteroidia  | 116                 | 517                  | 185                 | 298                  |
| <b>seq67</b>   | Bacteroidetes | Bacteroidia  | 12                  | 161                  | 0                   | 42                   |
| <b>seq115</b>  | Bacteroidetes | Bacteroidia  | 53                  | 1476                 | 0                   | 0                    |
| <b>seq140</b>  | Bacteroidetes | Bacteroidia  | 0                   | 0                    | 0                   | 0                    |
| <b>seq154</b>  | Bacteroidetes | Bacteroidia  | 0                   | 0                    | 112                 | 402                  |
| <b>seq156</b>  | Bacteroidetes | Bacteroidia  | 29                  | 188                  | 0                   | 0                    |
| <b>seq285</b>  | Bacteroidetes | Bacteroidia  | 7                   | 25                   | 43                  | 0                    |
| <b>seq336</b>  | Bacteroidetes | Bacteroidia  | 0                   | 0                    | 0                   | 0                    |
| <b>seq374</b>  | Bacteroidetes | Bacteroidia  | 0                   | 0                    | 0                   | 0                    |
| <b>seq378</b>  | Bacteroidetes | Bacteroidia  | 9                   | 31                   | 0                   | 0                    |
| <b>seq388</b>  | Bacteroidetes | Bacteroidia  | 33                  | 98                   | 0                   | 0                    |
| <b>seq406</b>  | Bacteroidetes | Bacteroidia  | 0                   | 20                   | 5                   | 94                   |
| <b>seq435</b>  | Bacteroidetes | Bacteroidia  | 0                   | 0                    | 0                   | 0                    |
| <b>seq718</b>  | Bacteroidetes | Bacteroidia  | 0                   | 51                   | 0                   | 6                    |
| <b>seq725</b>  | Bacteroidetes | Bacteroidia  | 0                   | 29                   | 0                   | 0                    |
| <b>seq815</b>  | Bacteroidetes | Bacteroidia  | 0                   | 0                    | 0                   | 0                    |
| <b>seq1109</b> | Bacteroidetes | Bacteroidia  | 0                   | 0                    | 0                   | 0                    |
| <b>seq1223</b> | Bacteroidetes | Bacteroidia  | 0                   | 0                    | 0                   | 0                    |
| <b>seq1233</b> | Bacteroidetes | Bacteroidia  | 0                   | 0                    | 0                   | 0                    |

Sequence Count Table

|                | <b>Phylum</b> | <b>Class</b> | <b>Subject17WK0</b> | <b>Subject17WK12</b> | <b>Subject1WK0</b> | <b>Subject1WK12</b> |
|----------------|---------------|--------------|---------------------|----------------------|--------------------|---------------------|
| <b>seq220</b>  | Bacteroidetes | Bacteroidia  | 0                   | 0                    | 0                  | 0                   |
| <b>seq16</b>   | Bacteroidetes | Bacteroidia  | 35                  | 6                    | 0                  | 0                   |
| <b>seq31</b>   | Bacteroidetes | Bacteroidia  | 0                   | 0                    | 0                  | 0                   |
| <b>seq108</b>  | Bacteroidetes | Bacteroidia  | 0                   | 0                    | 0                  | 0                   |
| <b>seq160</b>  | Bacteroidetes | Bacteroidia  | 0                   | 0                    | 0                  | 0                   |
| <b>seq347</b>  | Bacteroidetes | Bacteroidia  | 0                   | 0                    | 0                  | 0                   |
| <b>seq355</b>  | Bacteroidetes | Bacteroidia  | 0                   | 0                    | 0                  | 0                   |
| <b>seq380</b>  | Bacteroidetes | Bacteroidia  | 0                   | 0                    | 0                  | 0                   |
| <b>seq469</b>  | Bacteroidetes | Bacteroidia  | 0                   | 0                    | 0                  | 0                   |
| <b>seq957</b>  | Bacteroidetes | Bacteroidia  | 0                   | 0                    | 0                  | 0                   |
| <b>seq280</b>  | Bacteroidetes | Bacteroidia  | 0                   | 0                    | 0                  | 0                   |
| <b>seq245</b>  | Bacteroidetes | Bacteroidia  | 138                 | 3367                 | 0                  | 0                   |
| <b>seq562</b>  | Bacteroidetes | Bacteroidia  | 0                   | 0                    | 0                  | 0                   |
| <b>seq43</b>   | Bacteroidetes | Bacteroidia  | 134                 | 225                  | 3104               | 3460                |
| <b>seq67</b>   | Bacteroidetes | Bacteroidia  | 1681                | 606                  | 5957               | 6968                |
| <b>seq115</b>  | Bacteroidetes | Bacteroidia  | 252                 | 133                  | 0                  | 0                   |
| <b>seq140</b>  | Bacteroidetes | Bacteroidia  | 4660                | 4668                 | 0                  | 0                   |
| <b>seq154</b>  | Bacteroidetes | Bacteroidia  | 1204                | 752                  | 0                  | 0                   |
| <b>seq156</b>  | Bacteroidetes | Bacteroidia  | 0                   | 0                    | 0                  | 0                   |
| <b>seq285</b>  | Bacteroidetes | Bacteroidia  | 199                 | 196                  | 0                  | 0                   |
| <b>seq336</b>  | Bacteroidetes | Bacteroidia  | 0                   | 0                    | 0                  | 0                   |
| <b>seq374</b>  | Bacteroidetes | Bacteroidia  | 0                   | 0                    | 0                  | 0                   |
| <b>seq378</b>  | Bacteroidetes | Bacteroidia  | 202                 | 153                  | 0                  | 0                   |
| <b>seq388</b>  | Bacteroidetes | Bacteroidia  | 0                   | 0                    | 0                  | 0                   |
| <b>seq406</b>  | Bacteroidetes | Bacteroidia  | 0                   | 0                    | 0                  | 0                   |
| <b>seq435</b>  | Bacteroidetes | Bacteroidia  | 0                   | 0                    | 0                  | 0                   |
| <b>seq718</b>  | Bacteroidetes | Bacteroidia  | 0                   | 0                    | 0                  | 0                   |
| <b>seq725</b>  | Bacteroidetes | Bacteroidia  | 27                  | 48                   | 0                  | 0                   |
| <b>seq815</b>  | Bacteroidetes | Bacteroidia  | 0                   | 0                    | 0                  | 0                   |
| <b>seq1109</b> | Bacteroidetes | Bacteroidia  | 66                  | 37                   | 0                  | 0                   |
| <b>seq1223</b> | Bacteroidetes | Bacteroidia  | 0                   | 0                    | 0                  | 0                   |
| <b>seq1233</b> | Bacteroidetes | Bacteroidia  | 0                   | 0                    | 0                  | 0                   |

Sequence Count Table

|                | <b>Phylum</b> | <b>Class</b> | <b>Subject2WK0</b> | <b>Subject2WK12</b> | <b>Subject3WK0</b> | <b>Subject3WK12</b> |
|----------------|---------------|--------------|--------------------|---------------------|--------------------|---------------------|
| <b>seq220</b>  | Bacteroidetes | Bacteroidia  | 0                  | 0                   | 0                  | 0                   |
| <b>seq16</b>   | Bacteroidetes | Bacteroidia  | 0                  | 0                   | 0                  | 0                   |
| <b>seq31</b>   | Bacteroidetes | Bacteroidia  | 0                  | 0                   | 0                  | 0                   |
| <b>seq108</b>  | Bacteroidetes | Bacteroidia  | 0                  | 0                   | 0                  | 0                   |
| <b>seq160</b>  | Bacteroidetes | Bacteroidia  | 0                  | 0                   | 0                  | 0                   |
| <b>seq347</b>  | Bacteroidetes | Bacteroidia  | 0                  | 0                   | 0                  | 0                   |
| <b>seq355</b>  | Bacteroidetes | Bacteroidia  | 0                  | 0                   | 0                  | 0                   |
| <b>seq380</b>  | Bacteroidetes | Bacteroidia  | 0                  | 0                   | 0                  | 0                   |
| <b>seq469</b>  | Bacteroidetes | Bacteroidia  | 0                  | 0                   | 0                  | 0                   |
| <b>seq957</b>  | Bacteroidetes | Bacteroidia  | 0                  | 0                   | 0                  | 0                   |
| <b>seq280</b>  | Bacteroidetes | Bacteroidia  | 0                  | 0                   | 0                  | 0                   |
| <b>seq245</b>  | Bacteroidetes | Bacteroidia  | 0                  | 0                   | 0                  | 0                   |
| <b>seq562</b>  | Bacteroidetes | Bacteroidia  | 0                  | 0                   | 0                  | 0                   |
| <b>seq43</b>   | Bacteroidetes | Bacteroidia  | 1136               | 3084                | 0                  | 0                   |
| <b>seq67</b>   | Bacteroidetes | Bacteroidia  | 599                | 1511                | 0                  | 0                   |
| <b>seq115</b>  | Bacteroidetes | Bacteroidia  | 0                  | 0                   | 0                  | 0                   |
| <b>seq140</b>  | Bacteroidetes | Bacteroidia  | 0                  | 0                   | 0                  | 0                   |
| <b>seq154</b>  | Bacteroidetes | Bacteroidia  | 0                  | 0                   | 0                  | 0                   |
| <b>seq156</b>  | Bacteroidetes | Bacteroidia  | 0                  | 0                   | 0                  | 0                   |
| <b>seq285</b>  | Bacteroidetes | Bacteroidia  | 0                  | 0                   | 0                  | 0                   |
| <b>seq336</b>  | Bacteroidetes | Bacteroidia  | 745                | 1013                | 0                  | 0                   |
| <b>seq374</b>  | Bacteroidetes | Bacteroidia  | 0                  | 0                   | 0                  | 0                   |
| <b>seq378</b>  | Bacteroidetes | Bacteroidia  | 0                  | 0                   | 0                  | 0                   |
| <b>seq388</b>  | Bacteroidetes | Bacteroidia  | 0                  | 0                   | 0                  | 0                   |
| <b>seq406</b>  | Bacteroidetes | Bacteroidia  | 0                  | 0                   | 0                  | 0                   |
| <b>seq435</b>  | Bacteroidetes | Bacteroidia  | 0                  | 0                   | 0                  | 0                   |
| <b>seq718</b>  | Bacteroidetes | Bacteroidia  | 0                  | 0                   | 0                  | 0                   |
| <b>seq725</b>  | Bacteroidetes | Bacteroidia  | 0                  | 0                   | 0                  | 0                   |
| <b>seq815</b>  | Bacteroidetes | Bacteroidia  | 0                  | 0                   | 0                  | 0                   |
| <b>seq1109</b> | Bacteroidetes | Bacteroidia  | 0                  | 0                   | 0                  | 0                   |
| <b>seq1223</b> | Bacteroidetes | Bacteroidia  | 0                  | 0                   | 0                  | 0                   |
| <b>seq1233</b> | Bacteroidetes | Bacteroidia  | 0                  | 0                   | 0                  | 0                   |



Sequence Count Table

|                | <b>Phylum</b> | <b>Class</b> | <b>Subject4WK0</b> | <b>Subject4WK12</b> | <b>Subject5WK0</b> | <b>Subject5WK12</b> |
|----------------|---------------|--------------|--------------------|---------------------|--------------------|---------------------|
| <b>seq220</b>  | Bacteroidetes | Bacteroidia  | 0                  | 0                   | 0                  | 0                   |
| <b>seq16</b>   | Bacteroidetes | Bacteroidia  | 0                  | 0                   | 0                  | 0                   |
| <b>seq31</b>   | Bacteroidetes | Bacteroidia  | 0                  | 0                   | 0                  | 0                   |
| <b>seq108</b>  | Bacteroidetes | Bacteroidia  | 0                  | 0                   | 0                  | 0                   |
| <b>seq160</b>  | Bacteroidetes | Bacteroidia  | 0                  | 0                   | 0                  | 0                   |
| <b>seq347</b>  | Bacteroidetes | Bacteroidia  | 0                  | 0                   | 0                  | 0                   |
| <b>seq355</b>  | Bacteroidetes | Bacteroidia  | 0                  | 0                   | 0                  | 0                   |
| <b>seq380</b>  | Bacteroidetes | Bacteroidia  | 0                  | 0                   | 0                  | 0                   |
| <b>seq469</b>  | Bacteroidetes | Bacteroidia  | 0                  | 0                   | 0                  | 0                   |
| <b>seq957</b>  | Bacteroidetes | Bacteroidia  | 0                  | 0                   | 0                  | 0                   |
| <b>seq280</b>  | Bacteroidetes | Bacteroidia  | 0                  | 0                   | 0                  | 0                   |
| <b>seq245</b>  | Bacteroidetes | Bacteroidia  | 0                  | 0                   | 0                  | 0                   |
| <b>seq562</b>  | Bacteroidetes | Bacteroidia  | 0                  | 0                   | 0                  | 0                   |
| <b>seq43</b>   | Bacteroidetes | Bacteroidia  | 523                | 1494                | 0                  | 0                   |
| <b>seq67</b>   | Bacteroidetes | Bacteroidia  | 0                  | 0                   | 52                 | 137                 |
| <b>seq115</b>  | Bacteroidetes | Bacteroidia  | 953                | 946                 | 26                 | 38                  |
| <b>seq140</b>  | Bacteroidetes | Bacteroidia  | 0                  | 0                   | 0                  | 0                   |
| <b>seq154</b>  | Bacteroidetes | Bacteroidia  | 0                  | 0                   | 288                | 302                 |
| <b>seq156</b>  | Bacteroidetes | Bacteroidia  | 0                  | 0                   | 0                  | 0                   |
| <b>seq285</b>  | Bacteroidetes | Bacteroidia  | 0                  | 0                   | 0                  | 0                   |
| <b>seq336</b>  | Bacteroidetes | Bacteroidia  | 0                  | 0                   | 0                  | 0                   |
| <b>seq374</b>  | Bacteroidetes | Bacteroidia  | 199                | 61                  | 0                  | 0                   |
| <b>seq378</b>  | Bacteroidetes | Bacteroidia  | 0                  | 0                   | 0                  | 0                   |
| <b>seq388</b>  | Bacteroidetes | Bacteroidia  | 0                  | 0                   | 0                  | 0                   |
| <b>seq406</b>  | Bacteroidetes | Bacteroidia  | 8                  | 6                   | 0                  | 0                   |
| <b>seq435</b>  | Bacteroidetes | Bacteroidia  | 0                  | 0                   | 0                  | 0                   |
| <b>seq718</b>  | Bacteroidetes | Bacteroidia  | 0                  | 0                   | 0                  | 0                   |
| <b>seq725</b>  | Bacteroidetes | Bacteroidia  | 16                 | 36                  | 0                  | 0                   |
| <b>seq815</b>  | Bacteroidetes | Bacteroidia  | 0                  | 0                   | 0                  | 0                   |
| <b>seq1109</b> | Bacteroidetes | Bacteroidia  | 0                  | 0                   | 0                  | 0                   |
| <b>seq1223</b> | Bacteroidetes | Bacteroidia  | 0                  | 0                   | 0                  | 0                   |
| <b>seq1233</b> | Bacteroidetes | Bacteroidia  | 0                  | 0                   | 0                  | 0                   |

Sequence Count Table

|                | <b>Phylum</b> | <b>Class</b> | <b>Subject6WK0</b> | <b>Subject6WK12</b> | <b>Subject18WK0</b> | <b>Subject18WK12</b> |
|----------------|---------------|--------------|--------------------|---------------------|---------------------|----------------------|
| <b>seq220</b>  | Bacteroidetes | Bacteroidia  | 0                  | 0                   | 0                   | 0                    |
| <b>seq16</b>   | Bacteroidetes | Bacteroidia  | 1748               | 2165                | 0                   | 0                    |
| <b>seq31</b>   | Bacteroidetes | Bacteroidia  | 319                | 345                 | 0                   | 0                    |
| <b>seq108</b>  | Bacteroidetes | Bacteroidia  | 3524               | 6230                | 0                   | 0                    |
| <b>seq160</b>  | Bacteroidetes | Bacteroidia  | 0                  | 0                   | 0                   | 0                    |
| <b>seq347</b>  | Bacteroidetes | Bacteroidia  | 0                  | 0                   | 0                   | 0                    |
| <b>seq355</b>  | Bacteroidetes | Bacteroidia  | 0                  | 0                   | 0                   | 0                    |
| <b>seq380</b>  | Bacteroidetes | Bacteroidia  | 0                  | 0                   | 0                   | 0                    |
| <b>seq469</b>  | Bacteroidetes | Bacteroidia  | 0                  | 0                   | 0                   | 0                    |
| <b>seq957</b>  | Bacteroidetes | Bacteroidia  | 0                  | 0                   | 0                   | 0                    |
| <b>seq280</b>  | Bacteroidetes | Bacteroidia  | 0                  | 0                   | 0                   | 0                    |
| <b>seq245</b>  | Bacteroidetes | Bacteroidia  | 0                  | 0                   | 0                   | 0                    |
| <b>seq562</b>  | Bacteroidetes | Bacteroidia  | 0                  | 0                   | 0                   | 0                    |
| <b>seq43</b>   | Bacteroidetes | Bacteroidia  | 632                | 266                 | 2371                | 1262                 |
| <b>seq67</b>   | Bacteroidetes | Bacteroidia  | 50                 | 68                  | 51                  | 0                    |
| <b>seq115</b>  | Bacteroidetes | Bacteroidia  | 19                 | 16                  | 0                   | 0                    |
| <b>seq140</b>  | Bacteroidetes | Bacteroidia  | 0                  | 0                   | 0                   | 0                    |
| <b>seq154</b>  | Bacteroidetes | Bacteroidia  | 249                | 273                 | 290                 | 165                  |
| <b>seq156</b>  | Bacteroidetes | Bacteroidia  | 183                | 16                  | 0                   | 0                    |
| <b>seq285</b>  | Bacteroidetes | Bacteroidia  | 50                 | 32                  | 170                 | 13                   |
| <b>seq336</b>  | Bacteroidetes | Bacteroidia  | 0                  | 0                   | 0                   | 0                    |
| <b>seq374</b>  | Bacteroidetes | Bacteroidia  | 0                  | 0                   | 87                  | 43                   |
| <b>seq378</b>  | Bacteroidetes | Bacteroidia  | 0                  | 0                   | 94                  | 84                   |
| <b>seq388</b>  | Bacteroidetes | Bacteroidia  | 0                  | 0                   | 0                   | 0                    |
| <b>seq406</b>  | Bacteroidetes | Bacteroidia  | 8                  | 11                  | 0                   | 0                    |
| <b>seq435</b>  | Bacteroidetes | Bacteroidia  | 0                  | 0                   | 0                   | 0                    |
| <b>seq718</b>  | Bacteroidetes | Bacteroidia  | 30                 | 33                  | 34                  | 8                    |
| <b>seq725</b>  | Bacteroidetes | Bacteroidia  | 17                 | 29                  | 114                 | 27                   |
| <b>seq815</b>  | Bacteroidetes | Bacteroidia  | 0                  | 0                   | 0                   | 0                    |
| <b>seq1109</b> | Bacteroidetes | Bacteroidia  | 0                  | 0                   | 0                   | 0                    |
| <b>seq1223</b> | Bacteroidetes | Bacteroidia  | 0                  | 0                   | 0                   | 0                    |
| <b>seq1233</b> | Bacteroidetes | Bacteroidia  | 8                  | 9                   | 0                   | 0                    |

Sequence Count Table

|                | <b>Phylum</b> | <b>Class</b> | <b>Subject19WK0</b> | <b>Subject19WK12</b> | <b>Subject20WK0</b> | <b>Subject20WK12</b> |
|----------------|---------------|--------------|---------------------|----------------------|---------------------|----------------------|
| <b>seq220</b>  | Bacteroidetes | Bacteroidia  | 0                   | 0                    | 481                 | 1189                 |
| <b>seq16</b>   | Bacteroidetes | Bacteroidia  | 0                   | 0                    | 0                   | 0                    |
| <b>seq31</b>   | Bacteroidetes | Bacteroidia  | 0                   | 0                    | 19180               | 16107                |
| <b>seq108</b>  | Bacteroidetes | Bacteroidia  | 0                   | 0                    | 0                   | 0                    |
| <b>seq160</b>  | Bacteroidetes | Bacteroidia  | 0                   | 0                    | 1309                | 2194                 |
| <b>seq347</b>  | Bacteroidetes | Bacteroidia  | 0                   | 0                    | 723                 | 878                  |
| <b>seq355</b>  | Bacteroidetes | Bacteroidia  | 0                   | 0                    | 800                 | 736                  |
| <b>seq380</b>  | Bacteroidetes | Bacteroidia  | 0                   | 0                    | 683                 | 699                  |
| <b>seq469</b>  | Bacteroidetes | Bacteroidia  | 0                   | 0                    | 0                   | 0                    |
| <b>seq957</b>  | Bacteroidetes | Bacteroidia  | 0                   | 0                    | 0                   | 0                    |
| <b>seq280</b>  | Bacteroidetes | Bacteroidia  | 0                   | 0                    | 1990                | 559                  |
| <b>seq245</b>  | Bacteroidetes | Bacteroidia  | 0                   | 0                    | 0                   | 0                    |
| <b>seq562</b>  | Bacteroidetes | Bacteroidia  | 0                   | 0                    | 315                 | 304                  |
| <b>seq43</b>   | Bacteroidetes | Bacteroidia  | 0                   | 0                    | 0                   | 0                    |
| <b>seq67</b>   | Bacteroidetes | Bacteroidia  | 0                   | 0                    | 0                   | 0                    |
| <b>seq115</b>  | Bacteroidetes | Bacteroidia  | 0                   | 0                    | 11                  | 11                   |
| <b>seq140</b>  | Bacteroidetes | Bacteroidia  | 0                   | 0                    | 0                   | 0                    |
| <b>seq154</b>  | Bacteroidetes | Bacteroidia  | 0                   | 0                    | 69                  | 0                    |
| <b>seq156</b>  | Bacteroidetes | Bacteroidia  | 0                   | 0                    | 0                   | 0                    |
| <b>seq285</b>  | Bacteroidetes | Bacteroidia  | 0                   | 0                    | 0                   | 0                    |
| <b>seq336</b>  | Bacteroidetes | Bacteroidia  | 0                   | 0                    | 0                   | 0                    |
| <b>seq374</b>  | Bacteroidetes | Bacteroidia  | 0                   | 0                    | 70                  | 37                   |
| <b>seq378</b>  | Bacteroidetes | Bacteroidia  | 0                   | 0                    | 0                   | 0                    |
| <b>seq388</b>  | Bacteroidetes | Bacteroidia  | 0                   | 0                    | 0                   | 0                    |
| <b>seq406</b>  | Bacteroidetes | Bacteroidia  | 0                   | 0                    | 0                   | 0                    |
| <b>seq435</b>  | Bacteroidetes | Bacteroidia  | 0                   | 0                    | 0                   | 0                    |
| <b>seq718</b>  | Bacteroidetes | Bacteroidia  | 0                   | 0                    | 0                   | 0                    |
| <b>seq725</b>  | Bacteroidetes | Bacteroidia  | 0                   | 0                    | 0                   | 0                    |
| <b>seq815</b>  | Bacteroidetes | Bacteroidia  | 0                   | 0                    | 0                   | 0                    |
| <b>seq1109</b> | Bacteroidetes | Bacteroidia  | 0                   | 0                    | 0                   | 0                    |
| <b>seq1223</b> | Bacteroidetes | Bacteroidia  | 0                   | 0                    | 0                   | 0                    |
| <b>seq1233</b> | Bacteroidetes | Bacteroidia  | 0                   | 0                    | 0                   | 0                    |

Sequence Count Table

|                | <b>Phylum</b> | <b>Class</b> | <b>Subject7WK0</b> | <b>Subject7WK12</b> | <b>Subject21WK0</b> | <b>Subject21WK12</b> |
|----------------|---------------|--------------|--------------------|---------------------|---------------------|----------------------|
| <b>seq220</b>  | Bacteroidetes | Bacteroidia  | 0                  | 0                   | 0                   | 0                    |
| <b>seq16</b>   | Bacteroidetes | Bacteroidia  | 0                  | 0                   | 0                   | 0                    |
| <b>seq31</b>   | Bacteroidetes | Bacteroidia  | 0                  | 0                   | 0                   | 0                    |
| <b>seq108</b>  | Bacteroidetes | Bacteroidia  | 0                  | 0                   | 0                   | 0                    |
| <b>seq160</b>  | Bacteroidetes | Bacteroidia  | 0                  | 0                   | 0                   | 0                    |
| <b>seq347</b>  | Bacteroidetes | Bacteroidia  | 0                  | 0                   | 0                   | 0                    |
| <b>seq355</b>  | Bacteroidetes | Bacteroidia  | 0                  | 0                   | 0                   | 0                    |
| <b>seq380</b>  | Bacteroidetes | Bacteroidia  | 0                  | 0                   | 0                   | 0                    |
| <b>seq469</b>  | Bacteroidetes | Bacteroidia  | 0                  | 0                   | 0                   | 0                    |
| <b>seq957</b>  | Bacteroidetes | Bacteroidia  | 0                  | 0                   | 0                   | 0                    |
| <b>seq280</b>  | Bacteroidetes | Bacteroidia  | 0                  | 0                   | 0                   | 0                    |
| <b>seq245</b>  | Bacteroidetes | Bacteroidia  | 0                  | 0                   | 0                   | 0                    |
| <b>seq562</b>  | Bacteroidetes | Bacteroidia  | 0                  | 0                   | 0                   | 0                    |
| <b>seq43</b>   | Bacteroidetes | Bacteroidia  | 1425               | 2360                | 270                 | 744                  |
| <b>seq67</b>   | Bacteroidetes | Bacteroidia  | 75                 | 123                 | 0                   | 0                    |
| <b>seq115</b>  | Bacteroidetes | Bacteroidia  | 284                | 64                  | 77                  | 180                  |
| <b>seq140</b>  | Bacteroidetes | Bacteroidia  | 0                  | 0                   | 0                   | 0                    |
| <b>seq154</b>  | Bacteroidetes | Bacteroidia  | 0                  | 0                   | 0                   | 0                    |
| <b>seq156</b>  | Bacteroidetes | Bacteroidia  | 0                  | 0                   | 0                   | 0                    |
| <b>seq285</b>  | Bacteroidetes | Bacteroidia  | 69                 | 201                 | 18                  | 25                   |
| <b>seq336</b>  | Bacteroidetes | Bacteroidia  | 0                  | 0                   | 0                   | 0                    |
| <b>seq374</b>  | Bacteroidetes | Bacteroidia  | 74                 | 123                 | 0                   | 0                    |
| <b>seq378</b>  | Bacteroidetes | Bacteroidia  | 0                  | 0                   | 0                   | 0                    |
| <b>seq388</b>  | Bacteroidetes | Bacteroidia  | 0                  | 0                   | 0                   | 0                    |
| <b>seq406</b>  | Bacteroidetes | Bacteroidia  | 7                  | 15                  | 0                   | 0                    |
| <b>seq435</b>  | Bacteroidetes | Bacteroidia  | 0                  | 0                   | 0                   | 0                    |
| <b>seq718</b>  | Bacteroidetes | Bacteroidia  | 0                  | 0                   | 0                   | 0                    |
| <b>seq725</b>  | Bacteroidetes | Bacteroidia  | 0                  | 0                   | 0                   | 0                    |
| <b>seq815</b>  | Bacteroidetes | Bacteroidia  | 107                | 150                 | 0                   | 0                    |
| <b>seq1109</b> | Bacteroidetes | Bacteroidia  | 0                  | 0                   | 0                   | 0                    |
| <b>seq1223</b> | Bacteroidetes | Bacteroidia  | 0                  | 0                   | 0                   | 0                    |
| <b>seq1233</b> | Bacteroidetes | Bacteroidia  | 0                  | 0                   | 0                   | 0                    |

Sequence Count Table

|                | <b>Phylum</b> | <b>Class</b> | <b>Subject8WK0</b> | <b>Subject8WK12</b> | <b>Subject9WK0</b> | <b>Subject9WK12</b> |
|----------------|---------------|--------------|--------------------|---------------------|--------------------|---------------------|
| <b>seq220</b>  | Bacteroidetes | Bacteroidia  | 0                  | 0                   | 0                  | 0                   |
| <b>seq16</b>   | Bacteroidetes | Bacteroidia  | 0                  | 0                   | 0                  | 0                   |
| <b>seq31</b>   | Bacteroidetes | Bacteroidia  | 0                  | 0                   | 0                  | 0                   |
| <b>seq108</b>  | Bacteroidetes | Bacteroidia  | 0                  | 0                   | 0                  | 0                   |
| <b>seq160</b>  | Bacteroidetes | Bacteroidia  | 0                  | 0                   | 0                  | 0                   |
| <b>seq347</b>  | Bacteroidetes | Bacteroidia  | 0                  | 0                   | 0                  | 0                   |
| <b>seq355</b>  | Bacteroidetes | Bacteroidia  | 0                  | 0                   | 0                  | 0                   |
| <b>seq380</b>  | Bacteroidetes | Bacteroidia  | 0                  | 0                   | 0                  | 0                   |
| <b>seq469</b>  | Bacteroidetes | Bacteroidia  | 0                  | 0                   | 0                  | 0                   |
| <b>seq957</b>  | Bacteroidetes | Bacteroidia  | 0                  | 0                   | 0                  | 0                   |
| <b>seq280</b>  | Bacteroidetes | Bacteroidia  | 0                  | 0                   | 0                  | 0                   |
| <b>seq245</b>  | Bacteroidetes | Bacteroidia  | 0                  | 0                   | 0                  | 0                   |
| <b>seq562</b>  | Bacteroidetes | Bacteroidia  | 0                  | 0                   | 0                  | 0                   |
| <b>seq43</b>   | Bacteroidetes | Bacteroidia  | 1258               | 1634                | 1523               | 450                 |
| <b>seq67</b>   | Bacteroidetes | Bacteroidia  | 204                | 251                 | 1073               | 474                 |
| <b>seq115</b>  | Bacteroidetes | Bacteroidia  | 0                  | 0                   | 902                | 41                  |
| <b>seq140</b>  | Bacteroidetes | Bacteroidia  | 0                  | 0                   | 0                  | 0                   |
| <b>seq154</b>  | Bacteroidetes | Bacteroidia  | 238                | 183                 | 0                  | 0                   |
| <b>seq156</b>  | Bacteroidetes | Bacteroidia  | 271                | 0                   | 0                  | 0                   |
| <b>seq285</b>  | Bacteroidetes | Bacteroidia  | 85                 | 32                  | 0                  | 0                   |
| <b>seq336</b>  | Bacteroidetes | Bacteroidia  | 0                  | 0                   | 0                  | 0                   |
| <b>seq374</b>  | Bacteroidetes | Bacteroidia  | 0                  | 0                   | 0                  | 0                   |
| <b>seq378</b>  | Bacteroidetes | Bacteroidia  | 0                  | 0                   | 0                  | 0                   |
| <b>seq388</b>  | Bacteroidetes | Bacteroidia  | 243                | 223                 | 166                | 100                 |
| <b>seq406</b>  | Bacteroidetes | Bacteroidia  | 32                 | 54                  | 41                 | 12                  |
| <b>seq435</b>  | Bacteroidetes | Bacteroidia  | 0                  | 0                   | 0                  | 0                   |
| <b>seq718</b>  | Bacteroidetes | Bacteroidia  | 0                  | 0                   | 0                  | 0                   |
| <b>seq725</b>  | Bacteroidetes | Bacteroidia  | 0                  | 0                   | 0                  | 0                   |
| <b>seq815</b>  | Bacteroidetes | Bacteroidia  | 0                  | 0                   | 0                  | 0                   |
| <b>seq1109</b> | Bacteroidetes | Bacteroidia  | 0                  | 0                   | 0                  | 0                   |
| <b>seq1223</b> | Bacteroidetes | Bacteroidia  | 0                  | 0                   | 0                  | 0                   |
| <b>seq1233</b> | Bacteroidetes | Bacteroidia  | 0                  | 0                   | 0                  | 0                   |

Sequence Count Table

|                | <b>Phylum</b> | <b>Class</b> | <b>Subject10WK0</b> | <b>Subject10WK12</b> | <b>Subject22WK0</b> | <b>Subject22WK12</b> |
|----------------|---------------|--------------|---------------------|----------------------|---------------------|----------------------|
| <b>seq220</b>  | Bacteroidetes | Bacteroidia  | 0                   | 0                    | 61                  | 75                   |
| <b>seq16</b>   | Bacteroidetes | Bacteroidia  | 0                   | 0                    | 1126                | 306                  |
| <b>seq31</b>   | Bacteroidetes | Bacteroidia  | 0                   | 0                    | 224                 | 362                  |
| <b>seq108</b>  | Bacteroidetes | Bacteroidia  | 0                   | 0                    | 179                 | 0                    |
| <b>seq160</b>  | Bacteroidetes | Bacteroidia  | 0                   | 0                    | 0                   | 0                    |
| <b>seq347</b>  | Bacteroidetes | Bacteroidia  | 0                   | 0                    | 0                   | 0                    |
| <b>seq355</b>  | Bacteroidetes | Bacteroidia  | 0                   | 0                    | 0                   | 0                    |
| <b>seq380</b>  | Bacteroidetes | Bacteroidia  | 0                   | 0                    | 0                   | 0                    |
| <b>seq469</b>  | Bacteroidetes | Bacteroidia  | 0                   | 0                    | 0                   | 0                    |
| <b>seq957</b>  | Bacteroidetes | Bacteroidia  | 0                   | 0                    | 33                  | 128                  |
| <b>seq280</b>  | Bacteroidetes | Bacteroidia  | 0                   | 0                    | 0                   | 0                    |
| <b>seq245</b>  | Bacteroidetes | Bacteroidia  | 0                   | 0                    | 0                   | 0                    |
| <b>seq562</b>  | Bacteroidetes | Bacteroidia  | 0                   | 0                    | 0                   | 0                    |
| <b>seq43</b>   | Bacteroidetes | Bacteroidia  | 0                   | 0                    | 0                   | 11                   |
| <b>seq67</b>   | Bacteroidetes | Bacteroidia  | 0                   | 0                    | 43                  | 61                   |
| <b>seq115</b>  | Bacteroidetes | Bacteroidia  | 0                   | 0                    | 828                 | 836                  |
| <b>seq140</b>  | Bacteroidetes | Bacteroidia  | 0                   | 0                    | 0                   | 0                    |
| <b>seq154</b>  | Bacteroidetes | Bacteroidia  | 0                   | 0                    | 0                   | 0                    |
| <b>seq156</b>  | Bacteroidetes | Bacteroidia  | 2061                | 1234                 | 0                   | 0                    |
| <b>seq285</b>  | Bacteroidetes | Bacteroidia  | 0                   | 0                    | 75                  | 71                   |
| <b>seq336</b>  | Bacteroidetes | Bacteroidia  | 0                   | 0                    | 0                   | 0                    |
| <b>seq374</b>  | Bacteroidetes | Bacteroidia  | 0                   | 0                    | 0                   | 31                   |
| <b>seq378</b>  | Bacteroidetes | Bacteroidia  | 0                   | 0                    | 23                  | 37                   |
| <b>seq388</b>  | Bacteroidetes | Bacteroidia  | 0                   | 0                    | 250                 | 155                  |
| <b>seq406</b>  | Bacteroidetes | Bacteroidia  | 0                   | 0                    | 420                 | 282                  |
| <b>seq435</b>  | Bacteroidetes | Bacteroidia  | 0                   | 0                    | 0                   | 0                    |
| <b>seq718</b>  | Bacteroidetes | Bacteroidia  | 0                   | 0                    | 0                   | 0                    |
| <b>seq725</b>  | Bacteroidetes | Bacteroidia  | 0                   | 0                    | 0                   | 0                    |
| <b>seq815</b>  | Bacteroidetes | Bacteroidia  | 0                   | 0                    | 0                   | 0                    |
| <b>seq1109</b> | Bacteroidetes | Bacteroidia  | 0                   | 0                    | 0                   | 0                    |
| <b>seq1223</b> | Bacteroidetes | Bacteroidia  | 0                   | 0                    | 33                  | 40                   |
| <b>seq1233</b> | Bacteroidetes | Bacteroidia  | 0                   | 0                    | 0                   | 0                    |

Sequence Count Table

|                | <b>Phylum</b> | <b>Class</b> | <b>Subject23WK0</b> | <b>Subject23WK12</b> | <b>Subject24WK0</b> | <b>Subject24WK12</b> |
|----------------|---------------|--------------|---------------------|----------------------|---------------------|----------------------|
| <b>seq220</b>  | Bacteroidetes | Bacteroidia  | 0                   | 0                    | 0                   | 0                    |
| <b>seq16</b>   | Bacteroidetes | Bacteroidia  | 0                   | 0                    | 0                   | 0                    |
| <b>seq31</b>   | Bacteroidetes | Bacteroidia  | 0                   | 0                    | 5                   | 0                    |
| <b>seq108</b>  | Bacteroidetes | Bacteroidia  | 0                   | 0                    | 0                   | 0                    |
| <b>seq160</b>  | Bacteroidetes | Bacteroidia  | 0                   | 0                    | 0                   | 0                    |
| <b>seq347</b>  | Bacteroidetes | Bacteroidia  | 0                   | 0                    | 0                   | 0                    |
| <b>seq355</b>  | Bacteroidetes | Bacteroidia  | 0                   | 0                    | 0                   | 0                    |
| <b>seq380</b>  | Bacteroidetes | Bacteroidia  | 0                   | 0                    | 0                   | 0                    |
| <b>seq469</b>  | Bacteroidetes | Bacteroidia  | 0                   | 0                    | 0                   | 0                    |
| <b>seq957</b>  | Bacteroidetes | Bacteroidia  | 0                   | 0                    | 0                   | 0                    |
| <b>seq280</b>  | Bacteroidetes | Bacteroidia  | 0                   | 0                    | 0                   | 0                    |
| <b>seq245</b>  | Bacteroidetes | Bacteroidia  | 0                   | 0                    | 0                   | 0                    |
| <b>seq562</b>  | Bacteroidetes | Bacteroidia  | 0                   | 0                    | 0                   | 0                    |
| <b>seq43</b>   | Bacteroidetes | Bacteroidia  | 713                 | 963                  | 493                 | 976                  |
| <b>seq67</b>   | Bacteroidetes | Bacteroidia  | 27                  | 24                   | 0                   | 145                  |
| <b>seq115</b>  | Bacteroidetes | Bacteroidia  | 92                  | 140                  | 14                  | 48                   |
| <b>seq140</b>  | Bacteroidetes | Bacteroidia  | 0                   | 0                    | 0                   | 0                    |
| <b>seq154</b>  | Bacteroidetes | Bacteroidia  | 420                 | 524                  | 223                 | 617                  |
| <b>seq156</b>  | Bacteroidetes | Bacteroidia  | 0                   | 0                    | 51                  | 671                  |
| <b>seq285</b>  | Bacteroidetes | Bacteroidia  | 95                  | 132                  | 79                  | 219                  |
| <b>seq336</b>  | Bacteroidetes | Bacteroidia  | 0                   | 0                    | 0                   | 0                    |
| <b>seq374</b>  | Bacteroidetes | Bacteroidia  | 0                   | 84                   | 0                   | 0                    |
| <b>seq378</b>  | Bacteroidetes | Bacteroidia  | 28                  | 62                   | 6                   | 45                   |
| <b>seq388</b>  | Bacteroidetes | Bacteroidia  | 0                   | 0                    | 0                   | 0                    |
| <b>seq406</b>  | Bacteroidetes | Bacteroidia  | 0                   | 0                    | 0                   | 0                    |
| <b>seq435</b>  | Bacteroidetes | Bacteroidia  | 0                   | 0                    | 0                   | 0                    |
| <b>seq718</b>  | Bacteroidetes | Bacteroidia  | 0                   | 0                    | 0                   | 0                    |
| <b>seq725</b>  | Bacteroidetes | Bacteroidia  | 0                   | 0                    | 0                   | 0                    |
| <b>seq815</b>  | Bacteroidetes | Bacteroidia  | 0                   | 0                    | 0                   | 0                    |
| <b>seq1109</b> | Bacteroidetes | Bacteroidia  | 0                   | 0                    | 0                   | 0                    |
| <b>seq1223</b> | Bacteroidetes | Bacteroidia  | 0                   | 0                    | 0                   | 0                    |
| <b>seq1233</b> | Bacteroidetes | Bacteroidia  | 0                   | 0                    | 0                   | 0                    |

Sequence Count Table

|                | <b>Phylum</b> | <b>Class</b> | <b>Subject11WK0</b> | <b>Subject11WK12</b> | <b>Subject12WK0</b> | <b>Subject12WK12</b> |
|----------------|---------------|--------------|---------------------|----------------------|---------------------|----------------------|
| <b>seq220</b>  | Bacteroidetes | Bacteroidia  | 0                   | 0                    | 0                   | 0                    |
| <b>seq16</b>   | Bacteroidetes | Bacteroidia  | 0                   | 0                    | 0                   | 0                    |
| <b>seq31</b>   | Bacteroidetes | Bacteroidia  | 0                   | 0                    | 10                  | 0                    |
| <b>seq108</b>  | Bacteroidetes | Bacteroidia  | 0                   | 0                    | 0                   | 0                    |
| <b>seq160</b>  | Bacteroidetes | Bacteroidia  | 0                   | 0                    | 0                   | 0                    |
| <b>seq347</b>  | Bacteroidetes | Bacteroidia  | 0                   | 0                    | 0                   | 0                    |
| <b>seq355</b>  | Bacteroidetes | Bacteroidia  | 0                   | 0                    | 0                   | 0                    |
| <b>seq380</b>  | Bacteroidetes | Bacteroidia  | 0                   | 0                    | 0                   | 0                    |
| <b>seq469</b>  | Bacteroidetes | Bacteroidia  | 0                   | 0                    | 0                   | 0                    |
| <b>seq957</b>  | Bacteroidetes | Bacteroidia  | 0                   | 0                    | 0                   | 0                    |
| <b>seq280</b>  | Bacteroidetes | Bacteroidia  | 0                   | 0                    | 0                   | 0                    |
| <b>seq245</b>  | Bacteroidetes | Bacteroidia  | 0                   | 0                    | 0                   | 0                    |
| <b>seq562</b>  | Bacteroidetes | Bacteroidia  | 0                   | 0                    | 0                   | 0                    |
| <b>seq43</b>   | Bacteroidetes | Bacteroidia  | 0                   | 0                    | 1258                | 2483                 |
| <b>seq67</b>   | Bacteroidetes | Bacteroidia  | 0                   | 0                    | 31                  | 67                   |
| <b>seq115</b>  | Bacteroidetes | Bacteroidia  | 0                   | 0                    | 0                   | 0                    |
| <b>seq140</b>  | Bacteroidetes | Bacteroidia  | 0                   | 0                    | 0                   | 0                    |
| <b>seq154</b>  | Bacteroidetes | Bacteroidia  | 0                   | 0                    | 183                 | 252                  |
| <b>seq156</b>  | Bacteroidetes | Bacteroidia  | 0                   | 0                    | 0                   | 0                    |
| <b>seq285</b>  | Bacteroidetes | Bacteroidia  | 0                   | 0                    | 50                  | 55                   |
| <b>seq336</b>  | Bacteroidetes | Bacteroidia  | 0                   | 0                    | 0                   | 0                    |
| <b>seq374</b>  | Bacteroidetes | Bacteroidia  | 0                   | 0                    | 0                   | 0                    |
| <b>seq378</b>  | Bacteroidetes | Bacteroidia  | 0                   | 0                    | 18                  | 24                   |
| <b>seq388</b>  | Bacteroidetes | Bacteroidia  | 0                   | 0                    | 0                   | 0                    |
| <b>seq406</b>  | Bacteroidetes | Bacteroidia  | 0                   | 0                    | 0                   | 0                    |
| <b>seq435</b>  | Bacteroidetes | Bacteroidia  | 0                   | 0                    | 0                   | 0                    |
| <b>seq718</b>  | Bacteroidetes | Bacteroidia  | 0                   | 0                    | 0                   | 0                    |
| <b>seq725</b>  | Bacteroidetes | Bacteroidia  | 0                   | 0                    | 0                   | 0                    |
| <b>seq815</b>  | Bacteroidetes | Bacteroidia  | 0                   | 0                    | 0                   | 0                    |
| <b>seq1109</b> | Bacteroidetes | Bacteroidia  | 0                   | 0                    | 0                   | 0                    |
| <b>seq1223</b> | Bacteroidetes | Bacteroidia  | 0                   | 0                    | 0                   | 0                    |
| <b>seq1233</b> | Bacteroidetes | Bacteroidia  | 0                   | 0                    | 0                   | 0                    |



Sequence Count Table

|                | <b>Phylum</b> | <b>Class</b> | <b>Subject25WK0</b> | <b>Subject25WK12</b> | <b>Subject38WK0</b> | <b>Subject38WK12</b> |
|----------------|---------------|--------------|---------------------|----------------------|---------------------|----------------------|
| <b>seq220</b>  | Bacteroidetes | Bacteroidia  | 0                   | 0                    | 0                   | 0                    |
| <b>seq16</b>   | Bacteroidetes | Bacteroidia  | 0                   | 0                    | 0                   | 0                    |
| <b>seq31</b>   | Bacteroidetes | Bacteroidia  | 10                  | 0                    | 0                   | 0                    |
| <b>seq108</b>  | Bacteroidetes | Bacteroidia  | 0                   | 0                    | 0                   | 0                    |
| <b>seq160</b>  | Bacteroidetes | Bacteroidia  | 0                   | 0                    | 0                   | 0                    |
| <b>seq347</b>  | Bacteroidetes | Bacteroidia  | 0                   | 0                    | 0                   | 0                    |
| <b>seq355</b>  | Bacteroidetes | Bacteroidia  | 0                   | 0                    | 0                   | 0                    |
| <b>seq380</b>  | Bacteroidetes | Bacteroidia  | 0                   | 0                    | 0                   | 0                    |
| <b>seq469</b>  | Bacteroidetes | Bacteroidia  | 0                   | 0                    | 0                   | 0                    |
| <b>seq957</b>  | Bacteroidetes | Bacteroidia  | 0                   | 0                    | 0                   | 0                    |
| <b>seq280</b>  | Bacteroidetes | Bacteroidia  | 0                   | 0                    | 0                   | 0                    |
| <b>seq245</b>  | Bacteroidetes | Bacteroidia  | 0                   | 0                    | 0                   | 0                    |
| <b>seq562</b>  | Bacteroidetes | Bacteroidia  | 0                   | 0                    | 0                   | 0                    |
| <b>seq43</b>   | Bacteroidetes | Bacteroidia  | 944                 | 1380                 | 0                   | 0                    |
| <b>seq67</b>   | Bacteroidetes | Bacteroidia  | 418                 | 523                  | 0                   | 0                    |
| <b>seq115</b>  | Bacteroidetes | Bacteroidia  | 150                 | 148                  | 0                   | 0                    |
| <b>seq140</b>  | Bacteroidetes | Bacteroidia  | 0                   | 0                    | 0                   | 0                    |
| <b>seq154</b>  | Bacteroidetes | Bacteroidia  | 306                 | 91                   | 0                   | 0                    |
| <b>seq156</b>  | Bacteroidetes | Bacteroidia  | 1406                | 246                  | 0                   | 0                    |
| <b>seq285</b>  | Bacteroidetes | Bacteroidia  | 131                 | 95                   | 0                   | 0                    |
| <b>seq336</b>  | Bacteroidetes | Bacteroidia  | 0                   | 0                    | 0                   | 0                    |
| <b>seq374</b>  | Bacteroidetes | Bacteroidia  | 0                   | 0                    | 0                   | 0                    |
| <b>seq378</b>  | Bacteroidetes | Bacteroidia  | 311                 | 154                  | 0                   | 0                    |
| <b>seq388</b>  | Bacteroidetes | Bacteroidia  | 73                  | 0                    | 0                   | 0                    |
| <b>seq406</b>  | Bacteroidetes | Bacteroidia  | 42                  | 28                   | 0                   | 0                    |
| <b>seq435</b>  | Bacteroidetes | Bacteroidia  | 0                   | 0                    | 0                   | 0                    |
| <b>seq718</b>  | Bacteroidetes | Bacteroidia  | 41                  | 38                   | 0                   | 0                    |
| <b>seq725</b>  | Bacteroidetes | Bacteroidia  | 0                   | 0                    | 0                   | 0                    |
| <b>seq815</b>  | Bacteroidetes | Bacteroidia  | 0                   | 0                    | 0                   | 0                    |
| <b>seq1109</b> | Bacteroidetes | Bacteroidia  | 0                   | 0                    | 0                   | 0                    |
| <b>seq1223</b> | Bacteroidetes | Bacteroidia  | 0                   | 0                    | 0                   | 0                    |
| <b>seq1233</b> | Bacteroidetes | Bacteroidia  | 0                   | 0                    | 0                   | 0                    |

Sequence Count Table

|                | <b>Phylum</b> | <b>Class</b> | <b>Subject31WK0</b> | <b>Subject31WK12</b> | <b>Subject32WK0</b> | <b>Subject32WK12</b> |
|----------------|---------------|--------------|---------------------|----------------------|---------------------|----------------------|
| <b>seq220</b>  | Bacteroidetes | Bacteroidia  | 0                   | 0                    | 0                   | 0                    |
| <b>seq16</b>   | Bacteroidetes | Bacteroidia  | 0                   | 0                    | 0                   | 0                    |
| <b>seq31</b>   | Bacteroidetes | Bacteroidia  | 0                   | 0                    | 0                   | 0                    |
| <b>seq108</b>  | Bacteroidetes | Bacteroidia  | 0                   | 0                    | 0                   | 0                    |
| <b>seq160</b>  | Bacteroidetes | Bacteroidia  | 0                   | 0                    | 0                   | 0                    |
| <b>seq347</b>  | Bacteroidetes | Bacteroidia  | 0                   | 0                    | 0                   | 0                    |
| <b>seq355</b>  | Bacteroidetes | Bacteroidia  | 0                   | 0                    | 0                   | 0                    |
| <b>seq380</b>  | Bacteroidetes | Bacteroidia  | 0                   | 0                    | 0                   | 0                    |
| <b>seq469</b>  | Bacteroidetes | Bacteroidia  | 0                   | 0                    | 0                   | 0                    |
| <b>seq957</b>  | Bacteroidetes | Bacteroidia  | 0                   | 0                    | 0                   | 0                    |
| <b>seq280</b>  | Bacteroidetes | Bacteroidia  | 0                   | 0                    | 0                   | 0                    |
| <b>seq245</b>  | Bacteroidetes | Bacteroidia  | 0                   | 0                    | 0                   | 0                    |
| <b>seq562</b>  | Bacteroidetes | Bacteroidia  | 0                   | 0                    | 0                   | 0                    |
| <b>seq43</b>   | Bacteroidetes | Bacteroidia  | 0                   | 0                    | 496                 | 0                    |
| <b>seq67</b>   | Bacteroidetes | Bacteroidia  | 0                   | 0                    | 0                   | 0                    |
| <b>seq115</b>  | Bacteroidetes | Bacteroidia  | 0                   | 0                    | 0                   | 0                    |
| <b>seq140</b>  | Bacteroidetes | Bacteroidia  | 0                   | 0                    | 0                   | 0                    |
| <b>seq154</b>  | Bacteroidetes | Bacteroidia  | 0                   | 0                    | 0                   | 0                    |
| <b>seq156</b>  | Bacteroidetes | Bacteroidia  | 0                   | 0                    | 0                   | 0                    |
| <b>seq285</b>  | Bacteroidetes | Bacteroidia  | 0                   | 0                    | 44                  | 0                    |
| <b>seq336</b>  | Bacteroidetes | Bacteroidia  | 0                   | 0                    | 0                   | 0                    |
| <b>seq374</b>  | Bacteroidetes | Bacteroidia  | 0                   | 0                    | 0                   | 0                    |
| <b>seq378</b>  | Bacteroidetes | Bacteroidia  | 0                   | 0                    | 0                   | 0                    |
| <b>seq388</b>  | Bacteroidetes | Bacteroidia  | 0                   | 0                    | 0                   | 0                    |
| <b>seq406</b>  | Bacteroidetes | Bacteroidia  | 0                   | 0                    | 0                   | 0                    |
| <b>seq435</b>  | Bacteroidetes | Bacteroidia  | 0                   | 0                    | 0                   | 0                    |
| <b>seq718</b>  | Bacteroidetes | Bacteroidia  | 0                   | 0                    | 0                   | 0                    |
| <b>seq725</b>  | Bacteroidetes | Bacteroidia  | 0                   | 0                    | 0                   | 0                    |
| <b>seq815</b>  | Bacteroidetes | Bacteroidia  | 0                   | 0                    | 0                   | 0                    |
| <b>seq1109</b> | Bacteroidetes | Bacteroidia  | 0                   | 0                    | 0                   | 0                    |
| <b>seq1223</b> | Bacteroidetes | Bacteroidia  | 0                   | 0                    | 0                   | 0                    |
| <b>seq1233</b> | Bacteroidetes | Bacteroidia  | 0                   | 0                    | 0                   | 0                    |

Sequence Count Table

|                | <b>Phylum</b> | <b>Class</b> | <b>Subject13WK0</b> | <b>Subject13WK12</b> | <b>Subject39WK0</b> | <b>Subject39WK12</b> |
|----------------|---------------|--------------|---------------------|----------------------|---------------------|----------------------|
| <b>seq220</b>  | Bacteroidetes | Bacteroidia  | 0                   | 0                    | 0                   | 0                    |
| <b>seq16</b>   | Bacteroidetes | Bacteroidia  | 0                   | 0                    | 0                   | 0                    |
| <b>seq31</b>   | Bacteroidetes | Bacteroidia  | 0                   | 0                    | 0                   | 0                    |
| <b>seq108</b>  | Bacteroidetes | Bacteroidia  | 0                   | 0                    | 0                   | 0                    |
| <b>seq160</b>  | Bacteroidetes | Bacteroidia  | 0                   | 0                    | 0                   | 4036                 |
| <b>seq347</b>  | Bacteroidetes | Bacteroidia  | 0                   | 0                    | 0                   | 0                    |
| <b>seq355</b>  | Bacteroidetes | Bacteroidia  | 0                   | 0                    | 0                   | 0                    |
| <b>seq380</b>  | Bacteroidetes | Bacteroidia  | 0                   | 0                    | 0                   | 0                    |
| <b>seq469</b>  | Bacteroidetes | Bacteroidia  | 0                   | 0                    | 0                   | 901                  |
| <b>seq957</b>  | Bacteroidetes | Bacteroidia  | 0                   | 0                    | 0                   | 0                    |
| <b>seq280</b>  | Bacteroidetes | Bacteroidia  | 0                   | 0                    | 0                   | 0                    |
| <b>seq245</b>  | Bacteroidetes | Bacteroidia  | 0                   | 0                    | 0                   | 0                    |
| <b>seq562</b>  | Bacteroidetes | Bacteroidia  | 0                   | 0                    | 0                   | 0                    |
| <b>seq43</b>   | Bacteroidetes | Bacteroidia  | 860                 | 413                  | 0                   | 232                  |
| <b>seq67</b>   | Bacteroidetes | Bacteroidia  | 64                  | 40                   | 0                   | 45                   |
| <b>seq115</b>  | Bacteroidetes | Bacteroidia  | 95                  | 199                  | 0                   | 326                  |
| <b>seq140</b>  | Bacteroidetes | Bacteroidia  | 0                   | 0                    | 0                   | 0                    |
| <b>seq154</b>  | Bacteroidetes | Bacteroidia  | 0                   | 0                    | 0                   | 68                   |
| <b>seq156</b>  | Bacteroidetes | Bacteroidia  | 578                 | 743                  | 0                   | 0                    |
| <b>seq285</b>  | Bacteroidetes | Bacteroidia  | 89                  | 105                  | 0                   | 78                   |
| <b>seq336</b>  | Bacteroidetes | Bacteroidia  | 0                   | 0                    | 0                   | 0                    |
| <b>seq374</b>  | Bacteroidetes | Bacteroidia  | 0                   | 0                    | 0                   | 0                    |
| <b>seq378</b>  | Bacteroidetes | Bacteroidia  | 0                   | 0                    | 0                   | 51                   |
| <b>seq388</b>  | Bacteroidetes | Bacteroidia  | 0                   | 0                    | 0                   | 0                    |
| <b>seq406</b>  | Bacteroidetes | Bacteroidia  | 0                   | 7                    | 0                   | 57                   |
| <b>seq435</b>  | Bacteroidetes | Bacteroidia  | 0                   | 0                    | 0                   | 0                    |
| <b>seq718</b>  | Bacteroidetes | Bacteroidia  | 56                  | 41                   | 0                   | 14                   |
| <b>seq725</b>  | Bacteroidetes | Bacteroidia  | 0                   | 0                    | 0                   | 0                    |
| <b>seq815</b>  | Bacteroidetes | Bacteroidia  | 0                   | 0                    | 0                   | 0                    |
| <b>seq1109</b> | Bacteroidetes | Bacteroidia  | 0                   | 0                    | 0                   | 0                    |
| <b>seq1223</b> | Bacteroidetes | Bacteroidia  | 0                   | 0                    | 0                   | 0                    |
| <b>seq1233</b> | Bacteroidetes | Bacteroidia  | 42                  | 12                   | 0                   | 0                    |

Sequence Count Table

|                | <b>Phylum</b> | <b>Class</b> | <b>Subject26WK0</b> | <b>Subject26WK12</b> | <b>Subject14WK0</b> | <b>Subject14WK12</b> |
|----------------|---------------|--------------|---------------------|----------------------|---------------------|----------------------|
| <b>seq220</b>  | Bacteroidetes | Bacteroidia  | 0                   | 0                    | 0                   | 0                    |
| <b>seq16</b>   | Bacteroidetes | Bacteroidia  | 0                   | 0                    | 0                   | 0                    |
| <b>seq31</b>   | Bacteroidetes | Bacteroidia  | 0                   | 0                    | 0                   | 0                    |
| <b>seq108</b>  | Bacteroidetes | Bacteroidia  | 0                   | 0                    | 0                   | 0                    |
| <b>seq160</b>  | Bacteroidetes | Bacteroidia  | 0                   | 0                    | 0                   | 0                    |
| <b>seq347</b>  | Bacteroidetes | Bacteroidia  | 0                   | 0                    | 0                   | 0                    |
| <b>seq355</b>  | Bacteroidetes | Bacteroidia  | 0                   | 0                    | 0                   | 0                    |
| <b>seq380</b>  | Bacteroidetes | Bacteroidia  | 0                   | 0                    | 0                   | 0                    |
| <b>seq469</b>  | Bacteroidetes | Bacteroidia  | 0                   | 0                    | 0                   | 0                    |
| <b>seq957</b>  | Bacteroidetes | Bacteroidia  | 0                   | 0                    | 0                   | 0                    |
| <b>seq280</b>  | Bacteroidetes | Bacteroidia  | 0                   | 0                    | 0                   | 0                    |
| <b>seq245</b>  | Bacteroidetes | Bacteroidia  | 0                   | 0                    | 0                   | 0                    |
| <b>seq562</b>  | Bacteroidetes | Bacteroidia  | 0                   | 0                    | 0                   | 0                    |
| <b>seq43</b>   | Bacteroidetes | Bacteroidia  | 127                 | 897                  | 694                 | 533                  |
| <b>seq67</b>   | Bacteroidetes | Bacteroidia  | 0                   | 0                    | 41                  | 147                  |
| <b>seq115</b>  | Bacteroidetes | Bacteroidia  | 2423                | 685                  | 175                 | 60                   |
| <b>seq140</b>  | Bacteroidetes | Bacteroidia  | 0                   | 0                    | 0                   | 0                    |
| <b>seq154</b>  | Bacteroidetes | Bacteroidia  | 249                 | 151                  | 207                 | 345                  |
| <b>seq156</b>  | Bacteroidetes | Bacteroidia  | 0                   | 0                    | 0                   | 0                    |
| <b>seq285</b>  | Bacteroidetes | Bacteroidia  | 0                   | 0                    | 0                   | 0                    |
| <b>seq336</b>  | Bacteroidetes | Bacteroidia  | 0                   | 0                    | 0                   | 0                    |
| <b>seq374</b>  | Bacteroidetes | Bacteroidia  | 548                 | 77                   | 0                   | 0                    |
| <b>seq378</b>  | Bacteroidetes | Bacteroidia  | 0                   | 0                    | 23                  | 32                   |
| <b>seq388</b>  | Bacteroidetes | Bacteroidia  | 0                   | 0                    | 0                   | 0                    |
| <b>seq406</b>  | Bacteroidetes | Bacteroidia  | 0                   | 0                    | 14                  | 0                    |
| <b>seq435</b>  | Bacteroidetes | Bacteroidia  | 0                   | 0                    | 0                   | 0                    |
| <b>seq718</b>  | Bacteroidetes | Bacteroidia  | 0                   | 0                    | 0                   | 0                    |
| <b>seq725</b>  | Bacteroidetes | Bacteroidia  | 0                   | 0                    | 0                   | 0                    |
| <b>seq815</b>  | Bacteroidetes | Bacteroidia  | 0                   | 0                    | 0                   | 0                    |
| <b>seq1109</b> | Bacteroidetes | Bacteroidia  | 0                   | 0                    | 0                   | 0                    |
| <b>seq1223</b> | Bacteroidetes | Bacteroidia  | 0                   | 0                    | 0                   | 0                    |
| <b>seq1233</b> | Bacteroidetes | Bacteroidia  | 0                   | 0                    | 0                   | 0                    |

Sequence Count Table

|                | <b>Phylum</b> | <b>Class</b> | <b>Subject27WK0</b> | <b>Subject27WK12</b> | <b>Subject15WK0</b> | <b>Subject15WK12</b> |
|----------------|---------------|--------------|---------------------|----------------------|---------------------|----------------------|
| <b>seq220</b>  | Bacteroidetes | Bacteroidia  | 0                   | 0                    | 0                   | 0                    |
| <b>seq16</b>   | Bacteroidetes | Bacteroidia  | 0                   | 0                    | 0                   | 13                   |
| <b>seq31</b>   | Bacteroidetes | Bacteroidia  | 0                   | 0                    | 0                   | 0                    |
| <b>seq108</b>  | Bacteroidetes | Bacteroidia  | 0                   | 0                    | 0                   | 0                    |
| <b>seq160</b>  | Bacteroidetes | Bacteroidia  | 0                   | 0                    | 0                   | 0                    |
| <b>seq347</b>  | Bacteroidetes | Bacteroidia  | 0                   | 0                    | 0                   | 0                    |
| <b>seq355</b>  | Bacteroidetes | Bacteroidia  | 0                   | 0                    | 0                   | 0                    |
| <b>seq380</b>  | Bacteroidetes | Bacteroidia  | 0                   | 0                    | 0                   | 0                    |
| <b>seq469</b>  | Bacteroidetes | Bacteroidia  | 0                   | 0                    | 0                   | 0                    |
| <b>seq957</b>  | Bacteroidetes | Bacteroidia  | 0                   | 0                    | 0                   | 0                    |
| <b>seq280</b>  | Bacteroidetes | Bacteroidia  | 0                   | 0                    | 0                   | 0                    |
| <b>seq245</b>  | Bacteroidetes | Bacteroidia  | 0                   | 0                    | 0                   | 0                    |
| <b>seq562</b>  | Bacteroidetes | Bacteroidia  | 0                   | 0                    | 0                   | 0                    |
| <b>seq43</b>   | Bacteroidetes | Bacteroidia  | 0                   | 0                    | 418                 | 217                  |
| <b>seq67</b>   | Bacteroidetes | Bacteroidia  | 0                   | 0                    | 13                  | 22                   |
| <b>seq115</b>  | Bacteroidetes | Bacteroidia  | 0                   | 0                    | 50                  | 0                    |
| <b>seq140</b>  | Bacteroidetes | Bacteroidia  | 0                   | 0                    | 0                   | 0                    |
| <b>seq154</b>  | Bacteroidetes | Bacteroidia  | 0                   | 0                    | 0                   | 70                   |
| <b>seq156</b>  | Bacteroidetes | Bacteroidia  | 0                   | 0                    | 0                   | 0                    |
| <b>seq285</b>  | Bacteroidetes | Bacteroidia  | 0                   | 0                    | 28                  | 0                    |
| <b>seq336</b>  | Bacteroidetes | Bacteroidia  | 0                   | 0                    | 0                   | 0                    |
| <b>seq374</b>  | Bacteroidetes | Bacteroidia  | 0                   | 0                    | 0                   | 0                    |
| <b>seq378</b>  | Bacteroidetes | Bacteroidia  | 0                   | 0                    | 0                   | 0                    |
| <b>seq388</b>  | Bacteroidetes | Bacteroidia  | 0                   | 0                    | 0                   | 0                    |
| <b>seq406</b>  | Bacteroidetes | Bacteroidia  | 39                  | 19                   | 0                   | 0                    |
| <b>seq435</b>  | Bacteroidetes | Bacteroidia  | 738                 | 332                  | 0                   | 0                    |
| <b>seq718</b>  | Bacteroidetes | Bacteroidia  | 0                   | 0                    | 0                   | 0                    |
| <b>seq725</b>  | Bacteroidetes | Bacteroidia  | 0                   | 0                    | 0                   | 0                    |
| <b>seq815</b>  | Bacteroidetes | Bacteroidia  | 0                   | 0                    | 0                   | 0                    |
| <b>seq1109</b> | Bacteroidetes | Bacteroidia  | 0                   | 0                    | 0                   | 0                    |
| <b>seq1223</b> | Bacteroidetes | Bacteroidia  | 0                   | 0                    | 0                   | 0                    |
| <b>seq1233</b> | Bacteroidetes | Bacteroidia  | 0                   | 0                    | 0                   | 0                    |

Sequence Count Table

|                | <b>Phylum</b> | <b>Class</b> | <b>Δ</b> |  |  |  |
|----------------|---------------|--------------|----------|--|--|--|
| <b>seq220</b>  | Bacteroidetes | Bacteroidia  |          |  |  |  |
| <b>seq16</b>   | Bacteroidetes | Bacteroidia  |          |  |  |  |
| <b>seq31</b>   | Bacteroidetes | Bacteroidia  |          |  |  |  |
| <b>seq108</b>  | Bacteroidetes | Bacteroidia  |          |  |  |  |
| <b>seq160</b>  | Bacteroidetes | Bacteroidia  |          |  |  |  |
| <b>seq347</b>  | Bacteroidetes | Bacteroidia  |          |  |  |  |
| <b>seq355</b>  | Bacteroidetes | Bacteroidia  |          |  |  |  |
| <b>seq380</b>  | Bacteroidetes | Bacteroidia  |          |  |  |  |
| <b>seq469</b>  | Bacteroidetes | Bacteroidia  |          |  |  |  |
| <b>seq957</b>  | Bacteroidetes | Bacteroidia  |          |  |  |  |
| <b>seq280</b>  | Bacteroidetes | Bacteroidia  |          |  |  |  |
| <b>seq245</b>  | Bacteroidetes | Bacteroidia  |          |  |  |  |
| <b>seq562</b>  | Bacteroidetes | Bacteroidia  |          |  |  |  |
| <b>seq43</b>   | Bacteroidetes | Bacteroidia  |          |  |  |  |
| <b>seq67</b>   | Bacteroidetes | Bacteroidia  |          |  |  |  |
| <b>seq115</b>  | Bacteroidetes | Bacteroidia  |          |  |  |  |
| <b>seq140</b>  | Bacteroidetes | Bacteroidia  |          |  |  |  |
| <b>seq154</b>  | Bacteroidetes | Bacteroidia  |          |  |  |  |
| <b>seq156</b>  | Bacteroidetes | Bacteroidia  |          |  |  |  |
| <b>seq285</b>  | Bacteroidetes | Bacteroidia  |          |  |  |  |
| <b>seq336</b>  | Bacteroidetes | Bacteroidia  |          |  |  |  |
| <b>seq374</b>  | Bacteroidetes | Bacteroidia  |          |  |  |  |
| <b>seq378</b>  | Bacteroidetes | Bacteroidia  |          |  |  |  |
| <b>seq388</b>  | Bacteroidetes | Bacteroidia  |          |  |  |  |
| <b>seq406</b>  | Bacteroidetes | Bacteroidia  |          |  |  |  |
| <b>seq435</b>  | Bacteroidetes | Bacteroidia  |          |  |  |  |
| <b>seq718</b>  | Bacteroidetes | Bacteroidia  |          |  |  |  |
| <b>seq725</b>  | Bacteroidetes | Bacteroidia  |          |  |  |  |
| <b>seq815</b>  | Bacteroidetes | Bacteroidia  |          |  |  |  |
| <b>seq1109</b> | Bacteroidetes | Bacteroidia  |          |  |  |  |
| <b>seq1223</b> | Bacteroidetes | Bacteroidia  |          |  |  |  |
| <b>seq1233</b> | Bacteroidetes | Bacteroidia  |          |  |  |  |

Sequence Count Table

|                | <b>Phylum</b> | <b>Class</b> | <b>Order</b>     | <b>Family</b>  |
|----------------|---------------|--------------|------------------|----------------|
| <b>seq1285</b> | Bacteroidetes | Bacteroidia  | Bacteroidales    | Rikenellaceae  |
| <b>seq1430</b> | Bacteroidetes | Bacteroidia  | Bacteroidales    | Rikenellaceae  |
| <b>seq1609</b> | Bacteroidetes | Bacteroidia  | Bacteroidales    | Rikenellaceae  |
| <b>seq1710</b> | Bacteroidetes | Bacteroidia  | Bacteroidales    | Rikenellaceae  |
| <b>seq1711</b> | Bacteroidetes | Bacteroidia  | Bacteroidales    | Rikenellaceae  |
| <b>seq1860</b> | Bacteroidetes | Bacteroidia  | Bacteroidales    | Rikenellaceae  |
| <b>seq316</b>  | Bacteroidetes | Bacteroidia  | Bacteroidales    | Rikenellaceae  |
| <b>seq919</b>  | Bacteroidetes | Bacteroidia  | Bacteroidales    | Rikenellaceae  |
| <b>seq1496</b> | Bacteroidetes | Bacteroidia  | Bacteroidales    | Rikenellaceae  |
| <b>seq39</b>   | Bacteroidetes | Bacteroidia  | Bacteroidales    | Tannerellaceae |
| <b>seq75</b>   | Bacteroidetes | Bacteroidia  | Bacteroidales    | Tannerellaceae |
| <b>seq102</b>  | Bacteroidetes | Bacteroidia  | Bacteroidales    | Tannerellaceae |
| <b>seq134</b>  | Bacteroidetes | Bacteroidia  | Bacteroidales    | Tannerellaceae |
| <b>seq165</b>  | Bacteroidetes | Bacteroidia  | Bacteroidales    | Tannerellaceae |
| <b>seq257</b>  | Bacteroidetes | Bacteroidia  | Bacteroidales    | Tannerellaceae |
| <b>seq375</b>  | Bacteroidetes | Bacteroidia  | Bacteroidales    | Tannerellaceae |
| <b>seq426</b>  | Bacteroidetes | Bacteroidia  | Bacteroidales    | Tannerellaceae |
| <b>seq441</b>  | Bacteroidetes | Bacteroidia  | Bacteroidales    | Tannerellaceae |
| <b>seq456</b>  | Bacteroidetes | Bacteroidia  | Bacteroidales    | Tannerellaceae |
| <b>seq492</b>  | Bacteroidetes | Bacteroidia  | Bacteroidales    | Tannerellaceae |
| <b>seq571</b>  | Bacteroidetes | Bacteroidia  | Bacteroidales    | Tannerellaceae |
| <b>seq633</b>  | Bacteroidetes | Bacteroidia  | Bacteroidales    | Tannerellaceae |
| <b>seq699</b>  | Bacteroidetes | Bacteroidia  | Bacteroidales    | Tannerellaceae |
| <b>seq708</b>  | Bacteroidetes | Bacteroidia  | Bacteroidales    | Tannerellaceae |
| <b>seq819</b>  | Bacteroidetes | Bacteroidia  | Bacteroidales    | Tannerellaceae |
| <b>seq822</b>  | Bacteroidetes | Bacteroidia  | Bacteroidales    | Tannerellaceae |
| <b>seq1186</b> | Bacteroidetes | Bacteroidia  | Bacteroidales    | Tannerellaceae |
| <b>seq1596</b> | Bacteroidetes | Bacteroidia  | Bacteroidales    | Tannerellaceae |
| <b>seq1727</b> | Bacteroidetes | Bacteroidia  | Bacteroidales    | Tannerellaceae |
| <b>seq1828</b> | Bacteroidetes | Bacteroidia  | Flavobacteriales | Weeksellaceae  |
| <b>seq407</b>  | Bacteroidetes | Bacteroidia  | Bacteroidales    |                |
| <b>seq587</b>  | Bacteroidetes | Bacteroidia  | Bacteroidales    |                |

Sequence Count Table

|                | <b>Phylum</b> | <b>Class</b> | <b>Genus</b>                | <b>Species</b> |
|----------------|---------------|--------------|-----------------------------|----------------|
| <b>seq1285</b> | Bacteroidetes | Bacteroidia  | Alistipes                   |                |
| <b>seq1430</b> | Bacteroidetes | Bacteroidia  | Alistipes                   |                |
| <b>seq1609</b> | Bacteroidetes | Bacteroidia  | Alistipes                   |                |
| <b>seq1710</b> | Bacteroidetes | Bacteroidia  | Alistipes                   |                |
| <b>seq1711</b> | Bacteroidetes | Bacteroidia  | Alistipes                   |                |
| <b>seq1860</b> | Bacteroidetes | Bacteroidia  | Rikenella                   |                |
| <b>seq316</b>  | Bacteroidetes | Bacteroidia  | Rikenellaceae_RC9_gut_group |                |
| <b>seq919</b>  | Bacteroidetes | Bacteroidia  | Rikenellaceae_RC9_gut_group |                |
| <b>seq1496</b> | Bacteroidetes | Bacteroidia  | Rikenellaceae_RC9_gut_group |                |
| <b>seq39</b>   | Bacteroidetes | Bacteroidia  | Parabacteroides             | merdae         |
| <b>seq75</b>   | Bacteroidetes | Bacteroidia  | Parabacteroides             | distasonis     |
| <b>seq102</b>  | Bacteroidetes | Bacteroidia  | Parabacteroides             | distasonis     |
| <b>seq134</b>  | Bacteroidetes | Bacteroidia  | Parabacteroides             | distasonis     |
| <b>seq165</b>  | Bacteroidetes | Bacteroidia  | Parabacteroides             | distasonis     |
| <b>seq257</b>  | Bacteroidetes | Bacteroidia  | Parabacteroides             | johnsonii      |
| <b>seq375</b>  | Bacteroidetes | Bacteroidia  | Parabacteroides             |                |
| <b>seq426</b>  | Bacteroidetes | Bacteroidia  | Parabacteroides             |                |
| <b>seq441</b>  | Bacteroidetes | Bacteroidia  | Parabacteroides             |                |
| <b>seq456</b>  | Bacteroidetes | Bacteroidia  | Parabacteroides             |                |
| <b>seq492</b>  | Bacteroidetes | Bacteroidia  | Parabacteroides             |                |
| <b>seq571</b>  | Bacteroidetes | Bacteroidia  | Parabacteroides             |                |
| <b>seq633</b>  | Bacteroidetes | Bacteroidia  | Parabacteroides             |                |
| <b>seq699</b>  | Bacteroidetes | Bacteroidia  | Parabacteroides             | distasonis     |
| <b>seq708</b>  | Bacteroidetes | Bacteroidia  | Parabacteroides             | goldsteinii    |
| <b>seq819</b>  | Bacteroidetes | Bacteroidia  | Parabacteroides             |                |
| <b>seq822</b>  | Bacteroidetes | Bacteroidia  | Parabacteroides             |                |
| <b>seq1186</b> | Bacteroidetes | Bacteroidia  | Parabacteroides             |                |
| <b>seq1596</b> | Bacteroidetes | Bacteroidia  | Parabacteroides             | distasonis     |
| <b>seq1727</b> | Bacteroidetes | Bacteroidia  | Parabacteroides             |                |
| <b>seq1828</b> | Bacteroidetes | Bacteroidia  | Cloacibacterium             |                |
| <b>seq407</b>  | Bacteroidetes | Bacteroidia  |                             |                |
| <b>seq587</b>  | Bacteroidetes | Bacteroidia  |                             |                |



Sequence Count Table

|                | <b>Phylum</b> | <b>Class</b> | <b>Subject34WK0</b> | <b>Subject34WK12</b> | <b>Subject16WK0</b> | <b>Subject16WK12</b> |
|----------------|---------------|--------------|---------------------|----------------------|---------------------|----------------------|
| <b>seq1285</b> | Bacteroidetes | Bacteroidia  | 0                   | 0                    | 0                   | 0                    |
| <b>seq1430</b> | Bacteroidetes | Bacteroidia  | 0                   | 0                    | 0                   | 0                    |
| <b>seq1609</b> | Bacteroidetes | Bacteroidia  | 0                   | 0                    | 0                   | 0                    |
| <b>seq1710</b> | Bacteroidetes | Bacteroidia  | 0                   | 0                    | 0                   | 0                    |
| <b>seq1711</b> | Bacteroidetes | Bacteroidia  | 0                   | 0                    | 0                   | 0                    |
| <b>seq1860</b> | Bacteroidetes | Bacteroidia  | 0                   | 0                    | 0                   | 0                    |
| <b>seq316</b>  | Bacteroidetes | Bacteroidia  | 0                   | 0                    | 0                   | 0                    |
| <b>seq919</b>  | Bacteroidetes | Bacteroidia  | 0                   | 0                    | 0                   | 0                    |
| <b>seq1496</b> | Bacteroidetes | Bacteroidia  | 0                   | 0                    | 0                   | 0                    |
| <b>seq39</b>   | Bacteroidetes | Bacteroidia  | 132                 | 851                  | 495                 | 329                  |
| <b>seq75</b>   | Bacteroidetes | Bacteroidia  | 63                  | 357                  | 0                   | 0                    |
| <b>seq102</b>  | Bacteroidetes | Bacteroidia  | 0                   | 0                    | 0                   | 0                    |
| <b>seq134</b>  | Bacteroidetes | Bacteroidia  | 0                   | 0                    | 135                 | 271                  |
| <b>seq165</b>  | Bacteroidetes | Bacteroidia  | 0                   | 165                  | 0                   | 0                    |
| <b>seq257</b>  | Bacteroidetes | Bacteroidia  | 0                   | 0                    | 0                   | 0                    |
| <b>seq375</b>  | Bacteroidetes | Bacteroidia  | 0                   | 0                    | 0                   | 0                    |
| <b>seq426</b>  | Bacteroidetes | Bacteroidia  | 0                   | 0                    | 0                   | 0                    |
| <b>seq441</b>  | Bacteroidetes | Bacteroidia  | 0                   | 0                    | 0                   | 0                    |
| <b>seq456</b>  | Bacteroidetes | Bacteroidia  | 0                   | 0                    | 0                   | 0                    |
| <b>seq492</b>  | Bacteroidetes | Bacteroidia  | 0                   | 0                    | 0                   | 0                    |
| <b>seq571</b>  | Bacteroidetes | Bacteroidia  | 0                   | 0                    | 0                   | 0                    |
| <b>seq633</b>  | Bacteroidetes | Bacteroidia  | 0                   | 0                    | 0                   | 0                    |
| <b>seq699</b>  | Bacteroidetes | Bacteroidia  | 0                   | 0                    | 0                   | 0                    |
| <b>seq708</b>  | Bacteroidetes | Bacteroidia  | 0                   | 0                    | 0                   | 19                   |
| <b>seq819</b>  | Bacteroidetes | Bacteroidia  | 0                   | 0                    | 0                   | 0                    |
| <b>seq822</b>  | Bacteroidetes | Bacteroidia  | 0                   | 0                    | 0                   | 0                    |
| <b>seq1186</b> | Bacteroidetes | Bacteroidia  | 0                   | 0                    | 0                   | 0                    |
| <b>seq1596</b> | Bacteroidetes | Bacteroidia  | 0                   | 0                    | 0                   | 0                    |
| <b>seq1727</b> | Bacteroidetes | Bacteroidia  | 0                   | 0                    | 0                   | 0                    |
| <b>seq1828</b> | Bacteroidetes | Bacteroidia  | 0                   | 0                    | 0                   | 0                    |
| <b>seq407</b>  | Bacteroidetes | Bacteroidia  | 0                   | 0                    | 0                   | 0                    |
| <b>seq587</b>  | Bacteroidetes | Bacteroidia  | 0                   | 0                    | 0                   | 0                    |

Sequence Count Table

|                | <b>Phylum</b> | <b>Class</b> | <b>Subject17WK0</b> | <b>Subject17WK12</b> | <b>Subject1WK0</b> | <b>Subject1WK12</b> |
|----------------|---------------|--------------|---------------------|----------------------|--------------------|---------------------|
| <b>seq1285</b> | Bacteroidetes | Bacteroidia  | 0                   | 0                    | 0                  | 0                   |
| <b>seq1430</b> | Bacteroidetes | Bacteroidia  | 0                   | 0                    | 0                  | 0                   |
| <b>seq1609</b> | Bacteroidetes | Bacteroidia  | 0                   | 0                    | 0                  | 0                   |
| <b>seq1710</b> | Bacteroidetes | Bacteroidia  | 0                   | 0                    | 0                  | 0                   |
| <b>seq1711</b> | Bacteroidetes | Bacteroidia  | 0                   | 0                    | 0                  | 0                   |
| <b>seq1860</b> | Bacteroidetes | Bacteroidia  | 0                   | 0                    | 0                  | 0                   |
| <b>seq316</b>  | Bacteroidetes | Bacteroidia  | 0                   | 0                    | 0                  | 0                   |
| <b>seq919</b>  | Bacteroidetes | Bacteroidia  | 0                   | 0                    | 0                  | 0                   |
| <b>seq1496</b> | Bacteroidetes | Bacteroidia  | 0                   | 0                    | 14                 | 14                  |
| <b>seq39</b>   | Bacteroidetes | Bacteroidia  | 1697                | 4152                 | 0                  | 0                   |
| <b>seq75</b>   | Bacteroidetes | Bacteroidia  | 506                 | 649                  | 4495               | 4885                |
| <b>seq102</b>  | Bacteroidetes | Bacteroidia  | 0                   | 0                    | 0                  | 0                   |
| <b>seq134</b>  | Bacteroidetes | Bacteroidia  | 0                   | 0                    | 766                | 842                 |
| <b>seq165</b>  | Bacteroidetes | Bacteroidia  | 185                 | 252                  | 786                | 871                 |
| <b>seq257</b>  | Bacteroidetes | Bacteroidia  | 0                   | 0                    | 0                  | 0                   |
| <b>seq375</b>  | Bacteroidetes | Bacteroidia  | 0                   | 0                    | 0                  | 0                   |
| <b>seq426</b>  | Bacteroidetes | Bacteroidia  | 0                   | 0                    | 0                  | 0                   |
| <b>seq441</b>  | Bacteroidetes | Bacteroidia  | 0                   | 0                    | 0                  | 0                   |
| <b>seq456</b>  | Bacteroidetes | Bacteroidia  | 0                   | 0                    | 0                  | 0                   |
| <b>seq492</b>  | Bacteroidetes | Bacteroidia  | 0                   | 0                    | 0                  | 0                   |
| <b>seq571</b>  | Bacteroidetes | Bacteroidia  | 0                   | 0                    | 0                  | 0                   |
| <b>seq633</b>  | Bacteroidetes | Bacteroidia  | 0                   | 0                    | 0                  | 0                   |
| <b>seq699</b>  | Bacteroidetes | Bacteroidia  | 0                   | 0                    | 0                  | 0                   |
| <b>seq708</b>  | Bacteroidetes | Bacteroidia  | 0                   | 0                    | 0                  | 0                   |
| <b>seq819</b>  | Bacteroidetes | Bacteroidia  | 0                   | 0                    | 0                  | 0                   |
| <b>seq822</b>  | Bacteroidetes | Bacteroidia  | 0                   | 0                    | 0                  | 0                   |
| <b>seq1186</b> | Bacteroidetes | Bacteroidia  | 0                   | 0                    | 0                  | 0                   |
| <b>seq1596</b> | Bacteroidetes | Bacteroidia  | 0                   | 0                    | 0                  | 0                   |
| <b>seq1727</b> | Bacteroidetes | Bacteroidia  | 0                   | 0                    | 0                  | 0                   |
| <b>seq1828</b> | Bacteroidetes | Bacteroidia  | 0                   | 0                    | 0                  | 0                   |
| <b>seq407</b>  | Bacteroidetes | Bacteroidia  | 0                   | 0                    | 0                  | 0                   |
| <b>seq587</b>  | Bacteroidetes | Bacteroidia  | 0                   | 0                    | 0                  | 0                   |

Sequence Count Table

|                | <b>Phylum</b> | <b>Class</b> | <b>Subject2WK0</b> | <b>Subject2WK12</b> | <b>Subject3WK0</b> | <b>Subject3WK12</b> |
|----------------|---------------|--------------|--------------------|---------------------|--------------------|---------------------|
| <b>seq1285</b> | Bacteroidetes | Bacteroidia  | 0                  | 0                   | 0                  | 0                   |
| <b>seq1430</b> | Bacteroidetes | Bacteroidia  | 0                  | 0                   | 0                  | 0                   |
| <b>seq1609</b> | Bacteroidetes | Bacteroidia  | 0                  | 0                   | 0                  | 0                   |
| <b>seq1710</b> | Bacteroidetes | Bacteroidia  | 0                  | 0                   | 0                  | 0                   |
| <b>seq1711</b> | Bacteroidetes | Bacteroidia  | 0                  | 0                   | 0                  | 0                   |
| <b>seq1860</b> | Bacteroidetes | Bacteroidia  | 0                  | 0                   | 0                  | 0                   |
| <b>seq316</b>  | Bacteroidetes | Bacteroidia  | 0                  | 0                   | 0                  | 0                   |
| <b>seq919</b>  | Bacteroidetes | Bacteroidia  | 0                  | 0                   | 0                  | 0                   |
| <b>seq1496</b> | Bacteroidetes | Bacteroidia  | 0                  | 0                   | 0                  | 0                   |
| <b>seq39</b>   | Bacteroidetes | Bacteroidia  | 0                  | 0                   | 1743               | 1545                |
| <b>seq75</b>   | Bacteroidetes | Bacteroidia  | 0                  | 0                   | 1528               | 777                 |
| <b>seq102</b>  | Bacteroidetes | Bacteroidia  | 0                  | 0                   | 0                  | 0                   |
| <b>seq134</b>  | Bacteroidetes | Bacteroidia  | 0                  | 0                   | 0                  | 0                   |
| <b>seq165</b>  | Bacteroidetes | Bacteroidia  | 0                  | 0                   | 0                  | 0                   |
| <b>seq257</b>  | Bacteroidetes | Bacteroidia  | 1212               | 1169                | 0                  | 0                   |
| <b>seq375</b>  | Bacteroidetes | Bacteroidia  | 0                  | 0                   | 0                  | 0                   |
| <b>seq426</b>  | Bacteroidetes | Bacteroidia  | 0                  | 0                   | 0                  | 0                   |
| <b>seq441</b>  | Bacteroidetes | Bacteroidia  | 0                  | 0                   | 692                | 337                 |
| <b>seq456</b>  | Bacteroidetes | Bacteroidia  | 0                  | 0                   | 0                  | 0                   |
| <b>seq492</b>  | Bacteroidetes | Bacteroidia  | 0                  | 0                   | 0                  | 0                   |
| <b>seq571</b>  | Bacteroidetes | Bacteroidia  | 0                  | 0                   | 0                  | 0                   |
| <b>seq633</b>  | Bacteroidetes | Bacteroidia  | 0                  | 0                   | 0                  | 0                   |
| <b>seq699</b>  | Bacteroidetes | Bacteroidia  | 0                  | 0                   | 0                  | 0                   |
| <b>seq708</b>  | Bacteroidetes | Bacteroidia  | 0                  | 0                   | 0                  | 0                   |
| <b>seq819</b>  | Bacteroidetes | Bacteroidia  | 0                  | 0                   | 0                  | 0                   |
| <b>seq822</b>  | Bacteroidetes | Bacteroidia  | 0                  | 0                   | 0                  | 0                   |
| <b>seq1186</b> | Bacteroidetes | Bacteroidia  | 0                  | 0                   | 0                  | 0                   |
| <b>seq1596</b> | Bacteroidetes | Bacteroidia  | 0                  | 0                   | 0                  | 0                   |
| <b>seq1727</b> | Bacteroidetes | Bacteroidia  | 0                  | 0                   | 0                  | 0                   |
| <b>seq1828</b> | Bacteroidetes | Bacteroidia  | 0                  | 0                   | 0                  | 0                   |
| <b>seq407</b>  | Bacteroidetes | Bacteroidia  | 0                  | 0                   | 0                  | 0                   |
| <b>seq587</b>  | Bacteroidetes | Bacteroidia  | 0                  | 0                   | 0                  | 0                   |

Sequence Count Table

|                | <b>Phylum</b> | <b>Class</b> | <b>Subject4WK0</b> | <b>Subject4WK12</b> | <b>Subject5WK0</b> | <b>Subject5WK12</b> |
|----------------|---------------|--------------|--------------------|---------------------|--------------------|---------------------|
| <b>seq1285</b> | Bacteroidetes | Bacteroidia  | 0                  | 0                   | 0                  | 0                   |
| <b>seq1430</b> | Bacteroidetes | Bacteroidia  | 37                 | 0                   | 0                  | 0                   |
| <b>seq1609</b> | Bacteroidetes | Bacteroidia  | 0                  | 0                   | 0                  | 0                   |
| <b>seq1710</b> | Bacteroidetes | Bacteroidia  | 0                  | 0                   | 0                  | 0                   |
| <b>seq1711</b> | Bacteroidetes | Bacteroidia  | 0                  | 0                   | 0                  | 0                   |
| <b>seq1860</b> | Bacteroidetes | Bacteroidia  | 0                  | 0                   | 0                  | 0                   |
| <b>seq316</b>  | Bacteroidetes | Bacteroidia  | 0                  | 0                   | 0                  | 0                   |
| <b>seq919</b>  | Bacteroidetes | Bacteroidia  | 0                  | 0                   | 0                  | 0                   |
| <b>seq1496</b> | Bacteroidetes | Bacteroidia  | 0                  | 0                   | 0                  | 0                   |
| <b>seq39</b>   | Bacteroidetes | Bacteroidia  | 1150               | 1481                | 921                | 1024                |
| <b>seq75</b>   | Bacteroidetes | Bacteroidia  | 0                  | 0                   | 0                  | 0                   |
| <b>seq102</b>  | Bacteroidetes | Bacteroidia  | 0                  | 0                   | 282                | 235                 |
| <b>seq134</b>  | Bacteroidetes | Bacteroidia  | 274                | 306                 | 0                  | 0                   |
| <b>seq165</b>  | Bacteroidetes | Bacteroidia  | 805                | 937                 | 0                  | 0                   |
| <b>seq257</b>  | Bacteroidetes | Bacteroidia  | 0                  | 0                   | 0                  | 0                   |
| <b>seq375</b>  | Bacteroidetes | Bacteroidia  | 0                  | 0                   | 0                  | 0                   |
| <b>seq426</b>  | Bacteroidetes | Bacteroidia  | 0                  | 0                   | 0                  | 0                   |
| <b>seq441</b>  | Bacteroidetes | Bacteroidia  | 0                  | 0                   | 0                  | 0                   |
| <b>seq456</b>  | Bacteroidetes | Bacteroidia  | 0                  | 0                   | 0                  | 0                   |
| <b>seq492</b>  | Bacteroidetes | Bacteroidia  | 0                  | 0                   | 0                  | 0                   |
| <b>seq571</b>  | Bacteroidetes | Bacteroidia  | 0                  | 0                   | 0                  | 0                   |
| <b>seq633</b>  | Bacteroidetes | Bacteroidia  | 0                  | 0                   | 0                  | 0                   |
| <b>seq699</b>  | Bacteroidetes | Bacteroidia  | 0                  | 0                   | 0                  | 0                   |
| <b>seq708</b>  | Bacteroidetes | Bacteroidia  | 0                  | 0                   | 0                  | 0                   |
| <b>seq819</b>  | Bacteroidetes | Bacteroidia  | 0                  | 0                   | 0                  | 0                   |
| <b>seq822</b>  | Bacteroidetes | Bacteroidia  | 0                  | 0                   | 0                  | 0                   |
| <b>seq1186</b> | Bacteroidetes | Bacteroidia  | 0                  | 0                   | 0                  | 0                   |
| <b>seq1596</b> | Bacteroidetes | Bacteroidia  | 0                  | 0                   | 0                  | 0                   |
| <b>seq1727</b> | Bacteroidetes | Bacteroidia  | 0                  | 0                   | 0                  | 0                   |
| <b>seq1828</b> | Bacteroidetes | Bacteroidia  | 0                  | 0                   | 0                  | 0                   |
| <b>seq407</b>  | Bacteroidetes | Bacteroidia  | 0                  | 0                   | 0                  | 0                   |
| <b>seq587</b>  | Bacteroidetes | Bacteroidia  | 0                  | 0                   | 0                  | 0                   |

Sequence Count Table

|                | <b>Phylum</b> | <b>Class</b> | <b>Subject6WK0</b> | <b>Subject6WK12</b> | <b>Subject18WK0</b> | <b>Subject18WK12</b> |
|----------------|---------------|--------------|--------------------|---------------------|---------------------|----------------------|
| <b>seq1285</b> | Bacteroidetes | Bacteroidia  | 0                  | 0                   | 0                   | 0                    |
| <b>seq1430</b> | Bacteroidetes | Bacteroidia  | 0                  | 0                   | 0                   | 0                    |
| <b>seq1609</b> | Bacteroidetes | Bacteroidia  | 0                  | 0                   | 0                   | 0                    |
| <b>seq1710</b> | Bacteroidetes | Bacteroidia  | 0                  | 12                  | 0                   | 0                    |
| <b>seq1711</b> | Bacteroidetes | Bacteroidia  | 0                  | 0                   | 12                  | 0                    |
| <b>seq1860</b> | Bacteroidetes | Bacteroidia  | 0                  | 0                   | 0                   | 0                    |
| <b>seq316</b>  | Bacteroidetes | Bacteroidia  | 0                  | 0                   | 0                   | 0                    |
| <b>seq919</b>  | Bacteroidetes | Bacteroidia  | 0                  | 0                   | 0                   | 0                    |
| <b>seq1496</b> | Bacteroidetes | Bacteroidia  | 0                  | 0                   | 0                   | 0                    |
| <b>seq39</b>   | Bacteroidetes | Bacteroidia  | 594                | 573                 | 2224                | 1405                 |
| <b>seq75</b>   | Bacteroidetes | Bacteroidia  | 0                  | 69                  | 0                   | 0                    |
| <b>seq102</b>  | Bacteroidetes | Bacteroidia  | 0                  | 0                   | 671                 | 406                  |
| <b>seq134</b>  | Bacteroidetes | Bacteroidia  | 116                | 265                 | 0                   | 0                    |
| <b>seq165</b>  | Bacteroidetes | Bacteroidia  | 0                  | 90                  | 0                   | 0                    |
| <b>seq257</b>  | Bacteroidetes | Bacteroidia  | 0                  | 0                   | 0                   | 0                    |
| <b>seq375</b>  | Bacteroidetes | Bacteroidia  | 0                  | 0                   | 0                   | 0                    |
| <b>seq426</b>  | Bacteroidetes | Bacteroidia  | 0                  | 84                  | 0                   | 0                    |
| <b>seq441</b>  | Bacteroidetes | Bacteroidia  | 0                  | 0                   | 0                   | 0                    |
| <b>seq456</b>  | Bacteroidetes | Bacteroidia  | 0                  | 0                   | 0                   | 0                    |
| <b>seq492</b>  | Bacteroidetes | Bacteroidia  | 0                  | 0                   | 0                   | 0                    |
| <b>seq571</b>  | Bacteroidetes | Bacteroidia  | 0                  | 0                   | 0                   | 0                    |
| <b>seq633</b>  | Bacteroidetes | Bacteroidia  | 0                  | 0                   | 0                   | 0                    |
| <b>seq699</b>  | Bacteroidetes | Bacteroidia  | 0                  | 0                   | 0                   | 0                    |
| <b>seq708</b>  | Bacteroidetes | Bacteroidia  | 0                  | 0                   | 0                   | 0                    |
| <b>seq819</b>  | Bacteroidetes | Bacteroidia  | 0                  | 0                   | 0                   | 0                    |
| <b>seq822</b>  | Bacteroidetes | Bacteroidia  | 34                 | 77                  | 34                  | 0                    |
| <b>seq1186</b> | Bacteroidetes | Bacteroidia  | 0                  | 0                   | 0                   | 0                    |
| <b>seq1596</b> | Bacteroidetes | Bacteroidia  | 0                  | 0                   | 0                   | 0                    |
| <b>seq1727</b> | Bacteroidetes | Bacteroidia  | 0                  | 0                   | 0                   | 0                    |
| <b>seq1828</b> | Bacteroidetes | Bacteroidia  | 0                  | 0                   | 0                   | 0                    |
| <b>seq407</b>  | Bacteroidetes | Bacteroidia  | 0                  | 0                   | 0                   | 0                    |
| <b>seq587</b>  | Bacteroidetes | Bacteroidia  | 0                  | 0                   | 0                   | 0                    |

Sequence Count Table

|                | <b>Phylum</b> | <b>Class</b> | <b>Subject19WK0</b> | <b>Subject19WK12</b> | <b>Subject20WK0</b> | <b>Subject20WK12</b> |
|----------------|---------------|--------------|---------------------|----------------------|---------------------|----------------------|
| <b>seq1285</b> | Bacteroidetes | Bacteroidia  | 0                   | 0                    | 0                   | 0                    |
| <b>seq1430</b> | Bacteroidetes | Bacteroidia  | 0                   | 0                    | 0                   | 0                    |
| <b>seq1609</b> | Bacteroidetes | Bacteroidia  | 0                   | 0                    | 0                   | 0                    |
| <b>seq1710</b> | Bacteroidetes | Bacteroidia  | 0                   | 0                    | 0                   | 0                    |
| <b>seq1711</b> | Bacteroidetes | Bacteroidia  | 0                   | 0                    | 0                   | 0                    |
| <b>seq1860</b> | Bacteroidetes | Bacteroidia  | 0                   | 0                    | 0                   | 0                    |
| <b>seq316</b>  | Bacteroidetes | Bacteroidia  | 0                   | 0                    | 1175                | 837                  |
| <b>seq919</b>  | Bacteroidetes | Bacteroidia  | 0                   | 0                    | 80                  | 20                   |
| <b>seq1496</b> | Bacteroidetes | Bacteroidia  | 0                   | 0                    | 0                   | 0                    |
| <b>seq39</b>   | Bacteroidetes | Bacteroidia  | 0                   | 0                    | 154                 | 81                   |
| <b>seq75</b>   | Bacteroidetes | Bacteroidia  | 0                   | 0                    | 0                   | 0                    |
| <b>seq102</b>  | Bacteroidetes | Bacteroidia  | 0                   | 0                    | 0                   | 0                    |
| <b>seq134</b>  | Bacteroidetes | Bacteroidia  | 0                   | 0                    | 192                 | 76                   |
| <b>seq165</b>  | Bacteroidetes | Bacteroidia  | 0                   | 0                    | 27                  | 23                   |
| <b>seq257</b>  | Bacteroidetes | Bacteroidia  | 0                   | 0                    | 0                   | 0                    |
| <b>seq375</b>  | Bacteroidetes | Bacteroidia  | 0                   | 0                    | 0                   | 0                    |
| <b>seq426</b>  | Bacteroidetes | Bacteroidia  | 0                   | 0                    | 0                   | 0                    |
| <b>seq441</b>  | Bacteroidetes | Bacteroidia  | 0                   | 0                    | 0                   | 0                    |
| <b>seq456</b>  | Bacteroidetes | Bacteroidia  | 0                   | 0                    | 0                   | 0                    |
| <b>seq492</b>  | Bacteroidetes | Bacteroidia  | 0                   | 0                    | 0                   | 0                    |
| <b>seq571</b>  | Bacteroidetes | Bacteroidia  | 0                   | 0                    | 0                   | 0                    |
| <b>seq633</b>  | Bacteroidetes | Bacteroidia  | 0                   | 0                    | 0                   | 0                    |
| <b>seq699</b>  | Bacteroidetes | Bacteroidia  | 0                   | 0                    | 0                   | 0                    |
| <b>seq708</b>  | Bacteroidetes | Bacteroidia  | 0                   | 0                    | 0                   | 0                    |
| <b>seq819</b>  | Bacteroidetes | Bacteroidia  | 0                   | 0                    | 0                   | 0                    |
| <b>seq822</b>  | Bacteroidetes | Bacteroidia  | 0                   | 0                    | 0                   | 0                    |
| <b>seq1186</b> | Bacteroidetes | Bacteroidia  | 0                   | 0                    | 0                   | 0                    |
| <b>seq1596</b> | Bacteroidetes | Bacteroidia  | 0                   | 0                    | 0                   | 0                    |
| <b>seq1727</b> | Bacteroidetes | Bacteroidia  | 0                   | 0                    | 0                   | 0                    |
| <b>seq1828</b> | Bacteroidetes | Bacteroidia  | 0                   | 0                    | 0                   | 0                    |
| <b>seq407</b>  | Bacteroidetes | Bacteroidia  | 0                   | 0                    | 972                 | 243                  |
| <b>seq587</b>  | Bacteroidetes | Bacteroidia  | 0                   | 0                    | 0                   | 0                    |

Sequence Count Table

|                | <b>Phylum</b> | <b>Class</b> | <b>Subject7WK0</b> | <b>Subject7WK12</b> | <b>Subject21WK0</b> | <b>Subject21WK12</b> |
|----------------|---------------|--------------|--------------------|---------------------|---------------------|----------------------|
| <b>seq1285</b> | Bacteroidetes | Bacteroidia  | 0                  | 0                   | 0                   | 0                    |
| <b>seq1430</b> | Bacteroidetes | Bacteroidia  | 0                  | 0                   | 0                   | 0                    |
| <b>seq1609</b> | Bacteroidetes | Bacteroidia  | 0                  | 0                   | 0                   | 0                    |
| <b>seq1710</b> | Bacteroidetes | Bacteroidia  | 0                  | 0                   | 0                   | 0                    |
| <b>seq1711</b> | Bacteroidetes | Bacteroidia  | 0                  | 0                   | 0                   | 0                    |
| <b>seq1860</b> | Bacteroidetes | Bacteroidia  | 0                  | 0                   | 0                   | 0                    |
| <b>seq316</b>  | Bacteroidetes | Bacteroidia  | 0                  | 0                   | 0                   | 0                    |
| <b>seq919</b>  | Bacteroidetes | Bacteroidia  | 0                  | 0                   | 0                   | 0                    |
| <b>seq1496</b> | Bacteroidetes | Bacteroidia  | 0                  | 0                   | 0                   | 0                    |
| <b>seq39</b>   | Bacteroidetes | Bacteroidia  | 1881               | 2259                | 770                 | 2116                 |
| <b>seq75</b>   | Bacteroidetes | Bacteroidia  | 354                | 369                 | 883                 | 1069                 |
| <b>seq102</b>  | Bacteroidetes | Bacteroidia  | 0                  | 0                   | 0                   | 0                    |
| <b>seq134</b>  | Bacteroidetes | Bacteroidia  | 0                  | 0                   | 0                   | 0                    |
| <b>seq165</b>  | Bacteroidetes | Bacteroidia  | 0                  | 0                   | 585                 | 635                  |
| <b>seq257</b>  | Bacteroidetes | Bacteroidia  | 0                  | 0                   | 0                   | 0                    |
| <b>seq375</b>  | Bacteroidetes | Bacteroidia  | 0                  | 0                   | 0                   | 0                    |
| <b>seq426</b>  | Bacteroidetes | Bacteroidia  | 0                  | 0                   | 0                   | 0                    |
| <b>seq441</b>  | Bacteroidetes | Bacteroidia  | 0                  | 0                   | 0                   | 0                    |
| <b>seq456</b>  | Bacteroidetes | Bacteroidia  | 0                  | 0                   | 0                   | 0                    |
| <b>seq492</b>  | Bacteroidetes | Bacteroidia  | 0                  | 0                   | 0                   | 0                    |
| <b>seq571</b>  | Bacteroidetes | Bacteroidia  | 0                  | 0                   | 0                   | 0                    |
| <b>seq633</b>  | Bacteroidetes | Bacteroidia  | 0                  | 0                   | 0                   | 0                    |
| <b>seq699</b>  | Bacteroidetes | Bacteroidia  | 0                  | 0                   | 0                   | 0                    |
| <b>seq708</b>  | Bacteroidetes | Bacteroidia  | 0                  | 0                   | 0                   | 0                    |
| <b>seq819</b>  | Bacteroidetes | Bacteroidia  | 0                  | 0                   | 0                   | 0                    |
| <b>seq822</b>  | Bacteroidetes | Bacteroidia  | 0                  | 0                   | 0                   | 0                    |
| <b>seq1186</b> | Bacteroidetes | Bacteroidia  | 0                  | 0                   | 0                   | 0                    |
| <b>seq1596</b> | Bacteroidetes | Bacteroidia  | 0                  | 0                   | 0                   | 0                    |
| <b>seq1727</b> | Bacteroidetes | Bacteroidia  | 0                  | 11                  | 0                   | 0                    |
| <b>seq1828</b> | Bacteroidetes | Bacteroidia  | 0                  | 0                   | 0                   | 0                    |
| <b>seq407</b>  | Bacteroidetes | Bacteroidia  | 0                  | 0                   | 0                   | 0                    |
| <b>seq587</b>  | Bacteroidetes | Bacteroidia  | 0                  | 0                   | 0                   | 0                    |

Sequence Count Table

|                | <b>Phylum</b> | <b>Class</b> | <b>Subject8WK0</b> | <b>Subject8WK12</b> | <b>Subject9WK0</b> | <b>Subject9WK12</b> |
|----------------|---------------|--------------|--------------------|---------------------|--------------------|---------------------|
| <b>seq1285</b> | Bacteroidetes | Bacteroidia  | 0                  | 0                   | 0                  | 0                   |
| <b>seq1430</b> | Bacteroidetes | Bacteroidia  | 0                  | 0                   | 0                  | 0                   |
| <b>seq1609</b> | Bacteroidetes | Bacteroidia  | 0                  | 0                   | 0                  | 0                   |
| <b>seq1710</b> | Bacteroidetes | Bacteroidia  | 0                  | 0                   | 0                  | 0                   |
| <b>seq1711</b> | Bacteroidetes | Bacteroidia  | 0                  | 0                   | 0                  | 0                   |
| <b>seq1860</b> | Bacteroidetes | Bacteroidia  | 0                  | 0                   | 0                  | 0                   |
| <b>seq316</b>  | Bacteroidetes | Bacteroidia  | 0                  | 0                   | 0                  | 0                   |
| <b>seq919</b>  | Bacteroidetes | Bacteroidia  | 0                  | 0                   | 0                  | 0                   |
| <b>seq1496</b> | Bacteroidetes | Bacteroidia  | 0                  | 0                   | 0                  | 0                   |
| <b>seq39</b>   | Bacteroidetes | Bacteroidia  | 0                  | 0                   | 0                  | 4                   |
| <b>seq75</b>   | Bacteroidetes | Bacteroidia  | 0                  | 0                   | 392                | 398                 |
| <b>seq102</b>  | Bacteroidetes | Bacteroidia  | 694                | 2265                | 397                | 322                 |
| <b>seq134</b>  | Bacteroidetes | Bacteroidia  | 0                  | 0                   | 917                | 835                 |
| <b>seq165</b>  | Bacteroidetes | Bacteroidia  | 0                  | 0                   | 393                | 314                 |
| <b>seq257</b>  | Bacteroidetes | Bacteroidia  | 0                  | 0                   | 0                  | 0                   |
| <b>seq375</b>  | Bacteroidetes | Bacteroidia  | 0                  | 0                   | 0                  | 0                   |
| <b>seq426</b>  | Bacteroidetes | Bacteroidia  | 0                  | 0                   | 521                | 496                 |
| <b>seq441</b>  | Bacteroidetes | Bacteroidia  | 0                  | 0                   | 0                  | 0                   |
| <b>seq456</b>  | Bacteroidetes | Bacteroidia  | 0                  | 0                   | 0                  | 0                   |
| <b>seq492</b>  | Bacteroidetes | Bacteroidia  | 0                  | 0                   | 484                | 321                 |
| <b>seq571</b>  | Bacteroidetes | Bacteroidia  | 0                  | 0                   | 0                  | 0                   |
| <b>seq633</b>  | Bacteroidetes | Bacteroidia  | 0                  | 0                   | 0                  | 0                   |
| <b>seq699</b>  | Bacteroidetes | Bacteroidia  | 0                  | 0                   | 0                  | 0                   |
| <b>seq708</b>  | Bacteroidetes | Bacteroidia  | 0                  | 0                   | 0                  | 0                   |
| <b>seq819</b>  | Bacteroidetes | Bacteroidia  | 132                | 122                 | 0                  | 0                   |
| <b>seq822</b>  | Bacteroidetes | Bacteroidia  | 0                  | 0                   | 0                  | 0                   |
| <b>seq1186</b> | Bacteroidetes | Bacteroidia  | 0                  | 0                   | 0                  | 0                   |
| <b>seq1596</b> | Bacteroidetes | Bacteroidia  | 0                  | 0                   | 0                  | 0                   |
| <b>seq1727</b> | Bacteroidetes | Bacteroidia  | 0                  | 0                   | 0                  | 0                   |
| <b>seq1828</b> | Bacteroidetes | Bacteroidia  | 0                  | 0                   | 0                  | 0                   |
| <b>seq407</b>  | Bacteroidetes | Bacteroidia  | 0                  | 0                   | 0                  | 0                   |
| <b>seq587</b>  | Bacteroidetes | Bacteroidia  | 171                | 81                  | 0                  | 0                   |



Sequence Count Table

|                | <b>Phylum</b> | <b>Class</b> | <b>Subject10WK0</b> | <b>Subject10WK12</b> | <b>Subject22WK0</b> | <b>Subject22WK12</b> |
|----------------|---------------|--------------|---------------------|----------------------|---------------------|----------------------|
| <b>seq1285</b> | Bacteroidetes | Bacteroidia  | 0                   | 0                    | 0                   | 0                    |
| <b>seq1430</b> | Bacteroidetes | Bacteroidia  | 0                   | 0                    | 0                   | 0                    |
| <b>seq1609</b> | Bacteroidetes | Bacteroidia  | 0                   | 0                    | 0                   | 0                    |
| <b>seq1710</b> | Bacteroidetes | Bacteroidia  | 0                   | 0                    | 0                   | 0                    |
| <b>seq1711</b> | Bacteroidetes | Bacteroidia  | 0                   | 0                    | 0                   | 0                    |
| <b>seq1860</b> | Bacteroidetes | Bacteroidia  | 0                   | 0                    | 0                   | 0                    |
| <b>seq316</b>  | Bacteroidetes | Bacteroidia  | 0                   | 0                    | 0                   | 0                    |
| <b>seq919</b>  | Bacteroidetes | Bacteroidia  | 0                   | 0                    | 0                   | 0                    |
| <b>seq1496</b> | Bacteroidetes | Bacteroidia  | 0                   | 0                    | 0                   | 0                    |
| <b>seq39</b>   | Bacteroidetes | Bacteroidia  | 2924                | 2539                 | 130                 | 264                  |
| <b>seq75</b>   | Bacteroidetes | Bacteroidia  | 0                   | 0                    | 83                  | 80                   |
| <b>seq102</b>  | Bacteroidetes | Bacteroidia  | 4785                | 2070                 | 0                   | 0                    |
| <b>seq134</b>  | Bacteroidetes | Bacteroidia  | 0                   | 0                    | 0                   | 25                   |
| <b>seq165</b>  | Bacteroidetes | Bacteroidia  | 0                   | 0                    | 0                   | 0                    |
| <b>seq257</b>  | Bacteroidetes | Bacteroidia  | 0                   | 0                    | 0                   | 0                    |
| <b>seq375</b>  | Bacteroidetes | Bacteroidia  | 0                   | 0                    | 0                   | 0                    |
| <b>seq426</b>  | Bacteroidetes | Bacteroidia  | 0                   | 0                    | 0                   | 0                    |
| <b>seq441</b>  | Bacteroidetes | Bacteroidia  | 0                   | 0                    | 0                   | 0                    |
| <b>seq456</b>  | Bacteroidetes | Bacteroidia  | 0                   | 0                    | 0                   | 0                    |
| <b>seq492</b>  | Bacteroidetes | Bacteroidia  | 0                   | 0                    | 0                   | 0                    |
| <b>seq571</b>  | Bacteroidetes | Bacteroidia  | 0                   | 0                    | 0                   | 0                    |
| <b>seq633</b>  | Bacteroidetes | Bacteroidia  | 0                   | 0                    | 0                   | 0                    |
| <b>seq699</b>  | Bacteroidetes | Bacteroidia  | 0                   | 0                    | 0                   | 0                    |
| <b>seq708</b>  | Bacteroidetes | Bacteroidia  | 0                   | 0                    | 142                 | 205                  |
| <b>seq819</b>  | Bacteroidetes | Bacteroidia  | 0                   | 0                    | 0                   | 0                    |
| <b>seq822</b>  | Bacteroidetes | Bacteroidia  | 0                   | 0                    | 0                   | 0                    |
| <b>seq1186</b> | Bacteroidetes | Bacteroidia  | 0                   | 0                    | 0                   | 0                    |
| <b>seq1596</b> | Bacteroidetes | Bacteroidia  | 0                   | 0                    | 0                   | 20                   |
| <b>seq1727</b> | Bacteroidetes | Bacteroidia  | 0                   | 0                    | 0                   | 0                    |
| <b>seq1828</b> | Bacteroidetes | Bacteroidia  | 0                   | 6                    | 0                   | 0                    |
| <b>seq407</b>  | Bacteroidetes | Bacteroidia  | 0                   | 0                    | 0                   | 0                    |
| <b>seq587</b>  | Bacteroidetes | Bacteroidia  | 82                  | 41                   | 0                   | 0                    |

Sequence Count Table

|                | <b>Phylum</b> | <b>Class</b> | <b>Subject23WK0</b> | <b>Subject23WK12</b> | <b>Subject24WK0</b> | <b>Subject24WK12</b> |
|----------------|---------------|--------------|---------------------|----------------------|---------------------|----------------------|
| <b>seq1285</b> | Bacteroidetes | Bacteroidia  | 0                   | 0                    | 0                   | 0                    |
| <b>seq1430</b> | Bacteroidetes | Bacteroidia  | 0                   | 0                    | 0                   | 0                    |
| <b>seq1609</b> | Bacteroidetes | Bacteroidia  | 0                   | 0                    | 0                   | 0                    |
| <b>seq1710</b> | Bacteroidetes | Bacteroidia  | 0                   | 0                    | 0                   | 0                    |
| <b>seq1711</b> | Bacteroidetes | Bacteroidia  | 0                   | 0                    | 0                   | 0                    |
| <b>seq1860</b> | Bacteroidetes | Bacteroidia  | 0                   | 5                    | 0                   | 0                    |
| <b>seq316</b>  | Bacteroidetes | Bacteroidia  | 0                   | 0                    | 0                   | 0                    |
| <b>seq919</b>  | Bacteroidetes | Bacteroidia  | 0                   | 0                    | 31                  | 54                   |
| <b>seq1496</b> | Bacteroidetes | Bacteroidia  | 0                   | 0                    | 0                   | 0                    |
| <b>seq39</b>   | Bacteroidetes | Bacteroidia  | 587                 | 682                  | 1202                | 0                    |
| <b>seq75</b>   | Bacteroidetes | Bacteroidia  | 169                 | 149                  | 741                 | 356                  |
| <b>seq102</b>  | Bacteroidetes | Bacteroidia  | 0                   | 0                    | 0                   | 0                    |
| <b>seq134</b>  | Bacteroidetes | Bacteroidia  | 0                   | 0                    | 0                   | 0                    |
| <b>seq165</b>  | Bacteroidetes | Bacteroidia  | 193                 | 225                  | 0                   | 0                    |
| <b>seq257</b>  | Bacteroidetes | Bacteroidia  | 0                   | 0                    | 0                   | 0                    |
| <b>seq375</b>  | Bacteroidetes | Bacteroidia  | 0                   | 0                    | 974                 | 455                  |
| <b>seq426</b>  | Bacteroidetes | Bacteroidia  | 0                   | 0                    | 0                   | 0                    |
| <b>seq441</b>  | Bacteroidetes | Bacteroidia  | 0                   | 0                    | 0                   | 0                    |
| <b>seq456</b>  | Bacteroidetes | Bacteroidia  | 0                   | 0                    | 0                   | 0                    |
| <b>seq492</b>  | Bacteroidetes | Bacteroidia  | 0                   | 0                    | 0                   | 0                    |
| <b>seq571</b>  | Bacteroidetes | Bacteroidia  | 0                   | 0                    | 0                   | 0                    |
| <b>seq633</b>  | Bacteroidetes | Bacteroidia  | 0                   | 0                    | 0                   | 0                    |
| <b>seq699</b>  | Bacteroidetes | Bacteroidia  | 0                   | 0                    | 0                   | 0                    |
| <b>seq708</b>  | Bacteroidetes | Bacteroidia  | 0                   | 0                    | 0                   | 0                    |
| <b>seq819</b>  | Bacteroidetes | Bacteroidia  | 0                   | 0                    | 0                   | 0                    |
| <b>seq822</b>  | Bacteroidetes | Bacteroidia  | 0                   | 0                    | 0                   | 0                    |
| <b>seq1186</b> | Bacteroidetes | Bacteroidia  | 0                   | 0                    | 0                   | 0                    |
| <b>seq1596</b> | Bacteroidetes | Bacteroidia  | 0                   | 0                    | 0                   | 0                    |
| <b>seq1727</b> | Bacteroidetes | Bacteroidia  | 0                   | 0                    | 0                   | 0                    |
| <b>seq1828</b> | Bacteroidetes | Bacteroidia  | 0                   | 0                    | 0                   | 0                    |
| <b>seq407</b>  | Bacteroidetes | Bacteroidia  | 0                   | 0                    | 0                   | 0                    |
| <b>seq587</b>  | Bacteroidetes | Bacteroidia  | 0                   | 0                    | 46                  | 0                    |

Sequence Count Table

|                | <b>Phylum</b> | <b>Class</b> | <b>Subject11WK0</b> | <b>Subject11WK12</b> | <b>Subject12WK0</b> | <b>Subject12WK12</b> |
|----------------|---------------|--------------|---------------------|----------------------|---------------------|----------------------|
| <b>seq1285</b> | Bacteroidetes | Bacteroidia  | 0                   | 0                    | 0                   | 0                    |
| <b>seq1430</b> | Bacteroidetes | Bacteroidia  | 0                   | 0                    | 0                   | 0                    |
| <b>seq1609</b> | Bacteroidetes | Bacteroidia  | 0                   | 0                    | 19                  | 0                    |
| <b>seq1710</b> | Bacteroidetes | Bacteroidia  | 0                   | 0                    | 0                   | 0                    |
| <b>seq1711</b> | Bacteroidetes | Bacteroidia  | 0                   | 0                    | 0                   | 0                    |
| <b>seq1860</b> | Bacteroidetes | Bacteroidia  | 0                   | 0                    | 0                   | 0                    |
| <b>seq316</b>  | Bacteroidetes | Bacteroidia  | 0                   | 0                    | 0                   | 0                    |
| <b>seq919</b>  | Bacteroidetes | Bacteroidia  | 0                   | 0                    | 0                   | 0                    |
| <b>seq1496</b> | Bacteroidetes | Bacteroidia  | 0                   | 0                    | 0                   | 0                    |
| <b>seq39</b>   | Bacteroidetes | Bacteroidia  | 0                   | 0                    | 510                 | 544                  |
| <b>seq75</b>   | Bacteroidetes | Bacteroidia  | 0                   | 0                    | 0                   | 0                    |
| <b>seq102</b>  | Bacteroidetes | Bacteroidia  | 0                   | 0                    | 0                   | 0                    |
| <b>seq134</b>  | Bacteroidetes | Bacteroidia  | 832                 | 600                  | 295                 | 577                  |
| <b>seq165</b>  | Bacteroidetes | Bacteroidia  | 248                 | 185                  | 0                   | 0                    |
| <b>seq257</b>  | Bacteroidetes | Bacteroidia  | 0                   | 0                    | 0                   | 0                    |
| <b>seq375</b>  | Bacteroidetes | Bacteroidia  | 0                   | 0                    | 0                   | 0                    |
| <b>seq426</b>  | Bacteroidetes | Bacteroidia  | 0                   | 0                    | 0                   | 0                    |
| <b>seq441</b>  | Bacteroidetes | Bacteroidia  | 0                   | 0                    | 0                   | 0                    |
| <b>seq456</b>  | Bacteroidetes | Bacteroidia  | 469                 | 381                  | 0                   | 0                    |
| <b>seq492</b>  | Bacteroidetes | Bacteroidia  | 0                   | 0                    | 0                   | 0                    |
| <b>seq571</b>  | Bacteroidetes | Bacteroidia  | 276                 | 219                  | 0                   | 0                    |
| <b>seq633</b>  | Bacteroidetes | Bacteroidia  | 0                   | 0                    | 0                   | 0                    |
| <b>seq699</b>  | Bacteroidetes | Bacteroidia  | 0                   | 0                    | 0                   | 0                    |
| <b>seq708</b>  | Bacteroidetes | Bacteroidia  | 0                   | 0                    | 0                   | 0                    |
| <b>seq819</b>  | Bacteroidetes | Bacteroidia  | 0                   | 0                    | 0                   | 0                    |
| <b>seq822</b>  | Bacteroidetes | Bacteroidia  | 0                   | 0                    | 0                   | 0                    |
| <b>seq1186</b> | Bacteroidetes | Bacteroidia  | 0                   | 0                    | 0                   | 0                    |
| <b>seq1596</b> | Bacteroidetes | Bacteroidia  | 0                   | 0                    | 0                   | 0                    |
| <b>seq1727</b> | Bacteroidetes | Bacteroidia  | 0                   | 0                    | 0                   | 0                    |
| <b>seq1828</b> | Bacteroidetes | Bacteroidia  | 0                   | 0                    | 0                   | 0                    |
| <b>seq407</b>  | Bacteroidetes | Bacteroidia  | 0                   | 0                    | 0                   | 0                    |
| <b>seq587</b>  | Bacteroidetes | Bacteroidia  | 0                   | 0                    | 0                   | 0                    |

Sequence Count Table

|                | <b>Phylum</b> | <b>Class</b> | <b>Subject25WK0</b> | <b>Subject25WK12</b> | <b>Subject38WK0</b> | <b>Subject38WK12</b> |
|----------------|---------------|--------------|---------------------|----------------------|---------------------|----------------------|
| <b>seq1285</b> | Bacteroidetes | Bacteroidia  | 0                   | 0                    | 0                   | 0                    |
| <b>seq1430</b> | Bacteroidetes | Bacteroidia  | 0                   | 0                    | 0                   | 0                    |
| <b>seq1609</b> | Bacteroidetes | Bacteroidia  | 0                   | 0                    | 0                   | 0                    |
| <b>seq1710</b> | Bacteroidetes | Bacteroidia  | 0                   | 0                    | 0                   | 0                    |
| <b>seq1711</b> | Bacteroidetes | Bacteroidia  | 0                   | 0                    | 0                   | 0                    |
| <b>seq1860</b> | Bacteroidetes | Bacteroidia  | 0                   | 0                    | 0                   | 0                    |
| <b>seq316</b>  | Bacteroidetes | Bacteroidia  | 0                   | 0                    | 0                   | 0                    |
| <b>seq919</b>  | Bacteroidetes | Bacteroidia  | 0                   | 0                    | 0                   | 0                    |
| <b>seq1496</b> | Bacteroidetes | Bacteroidia  | 0                   | 0                    | 0                   | 0                    |
| <b>seq39</b>   | Bacteroidetes | Bacteroidia  | 0                   | 0                    | 0                   | 0                    |
| <b>seq75</b>   | Bacteroidetes | Bacteroidia  | 0                   | 0                    | 0                   | 0                    |
| <b>seq102</b>  | Bacteroidetes | Bacteroidia  | 299                 | 212                  | 0                   | 0                    |
| <b>seq134</b>  | Bacteroidetes | Bacteroidia  | 0                   | 0                    | 0                   | 0                    |
| <b>seq165</b>  | Bacteroidetes | Bacteroidia  | 0                   | 0                    | 0                   | 0                    |
| <b>seq257</b>  | Bacteroidetes | Bacteroidia  | 345                 | 224                  | 0                   | 0                    |
| <b>seq375</b>  | Bacteroidetes | Bacteroidia  | 0                   | 0                    | 0                   | 0                    |
| <b>seq426</b>  | Bacteroidetes | Bacteroidia  | 0                   | 0                    | 0                   | 0                    |
| <b>seq441</b>  | Bacteroidetes | Bacteroidia  | 0                   | 0                    | 0                   | 0                    |
| <b>seq456</b>  | Bacteroidetes | Bacteroidia  | 0                   | 0                    | 0                   | 0                    |
| <b>seq492</b>  | Bacteroidetes | Bacteroidia  | 0                   | 0                    | 0                   | 0                    |
| <b>seq571</b>  | Bacteroidetes | Bacteroidia  | 0                   | 0                    | 0                   | 0                    |
| <b>seq633</b>  | Bacteroidetes | Bacteroidia  | 0                   | 0                    | 0                   | 0                    |
| <b>seq699</b>  | Bacteroidetes | Bacteroidia  | 43                  | 0                    | 0                   | 0                    |
| <b>seq708</b>  | Bacteroidetes | Bacteroidia  | 0                   | 0                    | 0                   | 0                    |
| <b>seq819</b>  | Bacteroidetes | Bacteroidia  | 0                   | 0                    | 0                   | 0                    |
| <b>seq822</b>  | Bacteroidetes | Bacteroidia  | 0                   | 0                    | 0                   | 0                    |
| <b>seq1186</b> | Bacteroidetes | Bacteroidia  | 0                   | 0                    | 0                   | 0                    |
| <b>seq1596</b> | Bacteroidetes | Bacteroidia  | 0                   | 0                    | 0                   | 0                    |
| <b>seq1727</b> | Bacteroidetes | Bacteroidia  | 0                   | 0                    | 0                   | 0                    |
| <b>seq1828</b> | Bacteroidetes | Bacteroidia  | 0                   | 0                    | 0                   | 0                    |
| <b>seq407</b>  | Bacteroidetes | Bacteroidia  | 0                   | 0                    | 0                   | 0                    |
| <b>seq587</b>  | Bacteroidetes | Bacteroidia  | 144                 | 0                    | 0                   | 0                    |

Sequence Count Table

|                | <b>Phylum</b> | <b>Class</b> | <b>Subject31WK0</b> | <b>Subject31WK12</b> | <b>Subject32WK0</b> | <b>Subject32WK12</b> |
|----------------|---------------|--------------|---------------------|----------------------|---------------------|----------------------|
| <b>seq1285</b> | Bacteroidetes | Bacteroidia  | 0                   | 0                    | 0                   | 0                    |
| <b>seq1430</b> | Bacteroidetes | Bacteroidia  | 0                   | 0                    | 0                   | 0                    |
| <b>seq1609</b> | Bacteroidetes | Bacteroidia  | 0                   | 0                    | 0                   | 0                    |
| <b>seq1710</b> | Bacteroidetes | Bacteroidia  | 0                   | 0                    | 0                   | 0                    |
| <b>seq1711</b> | Bacteroidetes | Bacteroidia  | 0                   | 0                    | 0                   | 0                    |
| <b>seq1860</b> | Bacteroidetes | Bacteroidia  | 0                   | 0                    | 0                   | 0                    |
| <b>seq316</b>  | Bacteroidetes | Bacteroidia  | 0                   | 0                    | 0                   | 0                    |
| <b>seq919</b>  | Bacteroidetes | Bacteroidia  | 0                   | 0                    | 0                   | 0                    |
| <b>seq1496</b> | Bacteroidetes | Bacteroidia  | 0                   | 0                    | 0                   | 0                    |
| <b>seq39</b>   | Bacteroidetes | Bacteroidia  | 0                   | 0                    | 514                 | 0                    |
| <b>seq75</b>   | Bacteroidetes | Bacteroidia  | 0                   | 0                    | 0                   | 0                    |
| <b>seq102</b>  | Bacteroidetes | Bacteroidia  | 0                   | 0                    | 0                   | 0                    |
| <b>seq134</b>  | Bacteroidetes | Bacteroidia  | 0                   | 0                    | 496                 | 3                    |
| <b>seq165</b>  | Bacteroidetes | Bacteroidia  | 0                   | 0                    | 0                   | 0                    |
| <b>seq257</b>  | Bacteroidetes | Bacteroidia  | 0                   | 0                    | 0                   | 0                    |
| <b>seq375</b>  | Bacteroidetes | Bacteroidia  | 0                   | 0                    | 0                   | 0                    |
| <b>seq426</b>  | Bacteroidetes | Bacteroidia  | 0                   | 0                    | 0                   | 0                    |
| <b>seq441</b>  | Bacteroidetes | Bacteroidia  | 0                   | 0                    | 0                   | 0                    |
| <b>seq456</b>  | Bacteroidetes | Bacteroidia  | 0                   | 0                    | 0                   | 0                    |
| <b>seq492</b>  | Bacteroidetes | Bacteroidia  | 0                   | 0                    | 0                   | 0                    |
| <b>seq571</b>  | Bacteroidetes | Bacteroidia  | 0                   | 0                    | 105                 | 0                    |
| <b>seq633</b>  | Bacteroidetes | Bacteroidia  | 0                   | 0                    | 0                   | 0                    |
| <b>seq699</b>  | Bacteroidetes | Bacteroidia  | 0                   | 0                    | 72                  | 0                    |
| <b>seq708</b>  | Bacteroidetes | Bacteroidia  | 0                   | 0                    | 0                   | 0                    |
| <b>seq819</b>  | Bacteroidetes | Bacteroidia  | 0                   | 0                    | 0                   | 0                    |
| <b>seq822</b>  | Bacteroidetes | Bacteroidia  | 0                   | 0                    | 107                 | 0                    |
| <b>seq1186</b> | Bacteroidetes | Bacteroidia  | 0                   | 0                    | 0                   | 0                    |
| <b>seq1596</b> | Bacteroidetes | Bacteroidia  | 0                   | 0                    | 0                   | 0                    |
| <b>seq1727</b> | Bacteroidetes | Bacteroidia  | 0                   | 0                    | 0                   | 0                    |
| <b>seq1828</b> | Bacteroidetes | Bacteroidia  | 0                   | 0                    | 0                   | 0                    |
| <b>seq407</b>  | Bacteroidetes | Bacteroidia  | 0                   | 0                    | 0                   | 0                    |
| <b>seq587</b>  | Bacteroidetes | Bacteroidia  | 0                   | 0                    | 0                   | 0                    |

Sequence Count Table

|                | <b>Phylum</b> | <b>Class</b> | <b>Subject13WK0</b> | <b>Subject13WK12</b> | <b>Subject39WK0</b> | <b>Subject39WK12</b> |
|----------------|---------------|--------------|---------------------|----------------------|---------------------|----------------------|
| <b>seq1285</b> | Bacteroidetes | Bacteroidia  | 0                   | 0                    | 0                   | 0                    |
| <b>seq1430</b> | Bacteroidetes | Bacteroidia  | 0                   | 0                    | 0                   | 0                    |
| <b>seq1609</b> | Bacteroidetes | Bacteroidia  | 0                   | 0                    | 0                   | 0                    |
| <b>seq1710</b> | Bacteroidetes | Bacteroidia  | 0                   | 0                    | 0                   | 0                    |
| <b>seq1711</b> | Bacteroidetes | Bacteroidia  | 0                   | 0                    | 0                   | 0                    |
| <b>seq1860</b> | Bacteroidetes | Bacteroidia  | 0                   | 0                    | 0                   | 0                    |
| <b>seq316</b>  | Bacteroidetes | Bacteroidia  | 0                   | 0                    | 0                   | 0                    |
| <b>seq919</b>  | Bacteroidetes | Bacteroidia  | 0                   | 0                    | 0                   | 0                    |
| <b>seq1496</b> | Bacteroidetes | Bacteroidia  | 0                   | 0                    | 0                   | 0                    |
| <b>seq39</b>   | Bacteroidetes | Bacteroidia  | 1447                | 1000                 | 0                   | 1051                 |
| <b>seq75</b>   | Bacteroidetes | Bacteroidia  | 0                   | 0                    | 0                   | 0                    |
| <b>seq102</b>  | Bacteroidetes | Bacteroidia  | 121                 | 51                   | 0                   | 463                  |
| <b>seq134</b>  | Bacteroidetes | Bacteroidia  | 0                   | 0                    | 0                   | 0                    |
| <b>seq165</b>  | Bacteroidetes | Bacteroidia  | 0                   | 0                    | 0                   | 0                    |
| <b>seq257</b>  | Bacteroidetes | Bacteroidia  | 0                   | 0                    | 0                   | 177                  |
| <b>seq375</b>  | Bacteroidetes | Bacteroidia  | 0                   | 0                    | 0                   | 0                    |
| <b>seq426</b>  | Bacteroidetes | Bacteroidia  | 0                   | 0                    | 0                   | 0                    |
| <b>seq441</b>  | Bacteroidetes | Bacteroidia  | 0                   | 0                    | 0                   | 0                    |
| <b>seq456</b>  | Bacteroidetes | Bacteroidia  | 0                   | 0                    | 0                   | 0                    |
| <b>seq492</b>  | Bacteroidetes | Bacteroidia  | 0                   | 0                    | 0                   | 0                    |
| <b>seq571</b>  | Bacteroidetes | Bacteroidia  | 0                   | 0                    | 0                   | 0                    |
| <b>seq633</b>  | Bacteroidetes | Bacteroidia  | 0                   | 0                    | 0                   | 0                    |
| <b>seq699</b>  | Bacteroidetes | Bacteroidia  | 85                  | 36                   | 0                   | 144                  |
| <b>seq708</b>  | Bacteroidetes | Bacteroidia  | 0                   | 0                    | 0                   | 0                    |
| <b>seq819</b>  | Bacteroidetes | Bacteroidia  | 0                   | 0                    | 0                   | 0                    |
| <b>seq822</b>  | Bacteroidetes | Bacteroidia  | 0                   | 0                    | 0                   | 0                    |
| <b>seq1186</b> | Bacteroidetes | Bacteroidia  | 29                  | 56                   | 0                   | 0                    |
| <b>seq1596</b> | Bacteroidetes | Bacteroidia  | 0                   | 0                    | 0                   | 0                    |
| <b>seq1727</b> | Bacteroidetes | Bacteroidia  | 0                   | 0                    | 0                   | 0                    |
| <b>seq1828</b> | Bacteroidetes | Bacteroidia  | 0                   | 0                    | 0                   | 0                    |
| <b>seq407</b>  | Bacteroidetes | Bacteroidia  | 0                   | 0                    | 0                   | 0                    |
| <b>seq587</b>  | Bacteroidetes | Bacteroidia  | 0                   | 0                    | 0                   | 0                    |

Sequence Count Table

|                | <b>Phylum</b> | <b>Class</b> | <b>Subject26WK0</b> | <b>Subject26WK12</b> | <b>Subject14WK0</b> | <b>Subject14WK12</b> |
|----------------|---------------|--------------|---------------------|----------------------|---------------------|----------------------|
| <b>seq1285</b> | Bacteroidetes | Bacteroidia  | 0                   | 0                    | 0                   | 0                    |
| <b>seq1430</b> | Bacteroidetes | Bacteroidia  | 0                   | 0                    | 0                   | 0                    |
| <b>seq1609</b> | Bacteroidetes | Bacteroidia  | 0                   | 0                    | 0                   | 0                    |
| <b>seq1710</b> | Bacteroidetes | Bacteroidia  | 0                   | 0                    | 0                   | 0                    |
| <b>seq1711</b> | Bacteroidetes | Bacteroidia  | 0                   | 0                    | 0                   | 0                    |
| <b>seq1860</b> | Bacteroidetes | Bacteroidia  | 0                   | 0                    | 0                   | 0                    |
| <b>seq316</b>  | Bacteroidetes | Bacteroidia  | 0                   | 0                    | 0                   | 0                    |
| <b>seq919</b>  | Bacteroidetes | Bacteroidia  | 0                   | 0                    | 0                   | 0                    |
| <b>seq1496</b> | Bacteroidetes | Bacteroidia  | 0                   | 0                    | 0                   | 0                    |
| <b>seq39</b>   | Bacteroidetes | Bacteroidia  | 1817                | 1175                 | 156                 | 175                  |
| <b>seq75</b>   | Bacteroidetes | Bacteroidia  | 524                 | 923                  | 0                   | 0                    |
| <b>seq102</b>  | Bacteroidetes | Bacteroidia  | 0                   | 0                    | 0                   | 0                    |
| <b>seq134</b>  | Bacteroidetes | Bacteroidia  | 0                   | 0                    | 113                 | 190                  |
| <b>seq165</b>  | Bacteroidetes | Bacteroidia  | 91                  | 148                  | 0                   | 0                    |
| <b>seq257</b>  | Bacteroidetes | Bacteroidia  | 0                   | 0                    | 0                   | 0                    |
| <b>seq375</b>  | Bacteroidetes | Bacteroidia  | 0                   | 0                    | 0                   | 0                    |
| <b>seq426</b>  | Bacteroidetes | Bacteroidia  | 0                   | 0                    | 0                   | 0                    |
| <b>seq441</b>  | Bacteroidetes | Bacteroidia  | 0                   | 0                    | 0                   | 0                    |
| <b>seq456</b>  | Bacteroidetes | Bacteroidia  | 0                   | 0                    | 39                  | 67                   |
| <b>seq492</b>  | Bacteroidetes | Bacteroidia  | 0                   | 0                    | 0                   | 0                    |
| <b>seq571</b>  | Bacteroidetes | Bacteroidia  | 0                   | 0                    | 0                   | 0                    |
| <b>seq633</b>  | Bacteroidetes | Bacteroidia  | 295                 | 198                  | 0                   | 0                    |
| <b>seq699</b>  | Bacteroidetes | Bacteroidia  | 0                   | 0                    | 0                   | 0                    |
| <b>seq708</b>  | Bacteroidetes | Bacteroidia  | 0                   | 0                    | 0                   | 0                    |
| <b>seq819</b>  | Bacteroidetes | Bacteroidia  | 0                   | 0                    | 0                   | 0                    |
| <b>seq822</b>  | Bacteroidetes | Bacteroidia  | 0                   | 0                    | 0                   | 0                    |
| <b>seq1186</b> | Bacteroidetes | Bacteroidia  | 0                   | 0                    | 0                   | 0                    |
| <b>seq1596</b> | Bacteroidetes | Bacteroidia  | 0                   | 0                    | 0                   | 0                    |
| <b>seq1727</b> | Bacteroidetes | Bacteroidia  | 0                   | 0                    | 0                   | 0                    |
| <b>seq1828</b> | Bacteroidetes | Bacteroidia  | 0                   | 0                    | 0                   | 0                    |
| <b>seq407</b>  | Bacteroidetes | Bacteroidia  | 0                   | 0                    | 0                   | 0                    |
| <b>seq587</b>  | Bacteroidetes | Bacteroidia  | 0                   | 0                    | 0                   | 0                    |

Sequence Count Table

|                | <b>Phylum</b> | <b>Class</b> | <b>Subject27WK0</b> | <b>Subject27WK12</b> | <b>Subject15WK0</b> | <b>Subject15WK12</b> |
|----------------|---------------|--------------|---------------------|----------------------|---------------------|----------------------|
| <b>seq1285</b> | Bacteroidetes | Bacteroidia  | 0                   | 0                    | 60                  | 0                    |
| <b>seq1430</b> | Bacteroidetes | Bacteroidia  | 0                   | 0                    | 0                   | 0                    |
| <b>seq1609</b> | Bacteroidetes | Bacteroidia  | 0                   | 0                    | 0                   | 0                    |
| <b>seq1710</b> | Bacteroidetes | Bacteroidia  | 0                   | 0                    | 0                   | 0                    |
| <b>seq1711</b> | Bacteroidetes | Bacteroidia  | 0                   | 0                    | 0                   | 0                    |
| <b>seq1860</b> | Bacteroidetes | Bacteroidia  | 0                   | 0                    | 0                   | 0                    |
| <b>seq316</b>  | Bacteroidetes | Bacteroidia  | 0                   | 0                    | 0                   | 0                    |
| <b>seq919</b>  | Bacteroidetes | Bacteroidia  | 0                   | 0                    | 0                   | 0                    |
| <b>seq1496</b> | Bacteroidetes | Bacteroidia  | 0                   | 0                    | 0                   | 0                    |
| <b>seq39</b>   | Bacteroidetes | Bacteroidia  | 1622                | 1176                 | 764                 | 193                  |
| <b>seq75</b>   | Bacteroidetes | Bacteroidia  | 0                   | 47                   | 0                   | 0                    |
| <b>seq102</b>  | Bacteroidetes | Bacteroidia  | 0                   | 0                    | 0                   | 0                    |
| <b>seq134</b>  | Bacteroidetes | Bacteroidia  | 0                   | 0                    | 1030                | 1054                 |
| <b>seq165</b>  | Bacteroidetes | Bacteroidia  | 0                   | 0                    | 0                   | 0                    |
| <b>seq257</b>  | Bacteroidetes | Bacteroidia  | 0                   | 0                    | 0                   | 0                    |
| <b>seq375</b>  | Bacteroidetes | Bacteroidia  | 0                   | 0                    | 0                   | 0                    |
| <b>seq426</b>  | Bacteroidetes | Bacteroidia  | 0                   | 0                    | 0                   | 0                    |
| <b>seq441</b>  | Bacteroidetes | Bacteroidia  | 0                   | 0                    | 0                   | 0                    |
| <b>seq456</b>  | Bacteroidetes | Bacteroidia  | 0                   | 0                    | 0                   | 0                    |
| <b>seq492</b>  | Bacteroidetes | Bacteroidia  | 0                   | 0                    | 0                   | 0                    |
| <b>seq571</b>  | Bacteroidetes | Bacteroidia  | 0                   | 0                    | 0                   | 0                    |
| <b>seq633</b>  | Bacteroidetes | Bacteroidia  | 0                   | 0                    | 0                   | 0                    |
| <b>seq699</b>  | Bacteroidetes | Bacteroidia  | 0                   | 0                    | 0                   | 0                    |
| <b>seq708</b>  | Bacteroidetes | Bacteroidia  | 0                   | 0                    | 0                   | 0                    |
| <b>seq819</b>  | Bacteroidetes | Bacteroidia  | 0                   | 0                    | 0                   | 0                    |
| <b>seq822</b>  | Bacteroidetes | Bacteroidia  | 0                   | 0                    | 0                   | 0                    |
| <b>seq1186</b> | Bacteroidetes | Bacteroidia  | 0                   | 0                    | 0                   | 0                    |
| <b>seq1596</b> | Bacteroidetes | Bacteroidia  | 0                   | 0                    | 0                   | 0                    |
| <b>seq1727</b> | Bacteroidetes | Bacteroidia  | 0                   | 0                    | 0                   | 0                    |
| <b>seq1828</b> | Bacteroidetes | Bacteroidia  | 0                   | 0                    | 0                   | 0                    |
| <b>seq407</b>  | Bacteroidetes | Bacteroidia  | 0                   | 0                    | 0                   | 0                    |
| <b>seq587</b>  | Bacteroidetes | Bacteroidia  | 0                   | 0                    | 0                   | 0                    |



Sequence Count Table

|                | <b>Phylum</b> | <b>Class</b> | <b>Δ</b> |  |  |  |
|----------------|---------------|--------------|----------|--|--|--|
| <b>seq1285</b> | Bacteroidetes | Bacteroidia  |          |  |  |  |
| <b>seq1430</b> | Bacteroidetes | Bacteroidia  |          |  |  |  |
| <b>seq1609</b> | Bacteroidetes | Bacteroidia  |          |  |  |  |
| <b>seq1710</b> | Bacteroidetes | Bacteroidia  |          |  |  |  |
| <b>seq1711</b> | Bacteroidetes | Bacteroidia  |          |  |  |  |
| <b>seq1860</b> | Bacteroidetes | Bacteroidia  |          |  |  |  |
| <b>seq316</b>  | Bacteroidetes | Bacteroidia  |          |  |  |  |
| <b>seq919</b>  | Bacteroidetes | Bacteroidia  |          |  |  |  |
| <b>seq1496</b> | Bacteroidetes | Bacteroidia  |          |  |  |  |
| <b>seq39</b>   | Bacteroidetes | Bacteroidia  |          |  |  |  |
| <b>seq75</b>   | Bacteroidetes | Bacteroidia  |          |  |  |  |
| <b>seq102</b>  | Bacteroidetes | Bacteroidia  |          |  |  |  |
| <b>seq134</b>  | Bacteroidetes | Bacteroidia  |          |  |  |  |
| <b>seq165</b>  | Bacteroidetes | Bacteroidia  |          |  |  |  |
| <b>seq257</b>  | Bacteroidetes | Bacteroidia  |          |  |  |  |
| <b>seq375</b>  | Bacteroidetes | Bacteroidia  |          |  |  |  |
| <b>seq426</b>  | Bacteroidetes | Bacteroidia  |          |  |  |  |
| <b>seq441</b>  | Bacteroidetes | Bacteroidia  |          |  |  |  |
| <b>seq456</b>  | Bacteroidetes | Bacteroidia  |          |  |  |  |
| <b>seq492</b>  | Bacteroidetes | Bacteroidia  |          |  |  |  |
| <b>seq571</b>  | Bacteroidetes | Bacteroidia  |          |  |  |  |
| <b>seq633</b>  | Bacteroidetes | Bacteroidia  |          |  |  |  |
| <b>seq699</b>  | Bacteroidetes | Bacteroidia  |          |  |  |  |
| <b>seq708</b>  | Bacteroidetes | Bacteroidia  |          |  |  |  |
| <b>seq819</b>  | Bacteroidetes | Bacteroidia  |          |  |  |  |
| <b>seq822</b>  | Bacteroidetes | Bacteroidia  |          |  |  |  |
| <b>seq1186</b> | Bacteroidetes | Bacteroidia  |          |  |  |  |
| <b>seq1596</b> | Bacteroidetes | Bacteroidia  |          |  |  |  |
| <b>seq1727</b> | Bacteroidetes | Bacteroidia  |          |  |  |  |
| <b>seq1828</b> | Bacteroidetes | Bacteroidia  |          |  |  |  |
| <b>seq407</b>  | Bacteroidetes | Bacteroidia  |          |  |  |  |
| <b>seq587</b>  | Bacteroidetes | Bacteroidia  |          |  |  |  |

Sequence Count Table

|                | <b>Phylum</b>        | <b>Class</b>     | <b>Order</b>            | <b>Family</b>            |
|----------------|----------------------|------------------|-------------------------|--------------------------|
| <b>seq945</b>  | Bacteroidetes        | Bacteroidia      | Bacteroidales           |                          |
| <b>seq1107</b> | Bacteroidetes        | Bacteroidia      | Bacteroidales           |                          |
| <b>seq1282</b> | Bacteroidetes        | Bacteroidia      |                         |                          |
| <b>seq1440</b> | Bacteroidetes        | Bacteroidia      |                         |                          |
| <b>seq1670</b> | Bacteroidetes        | Bacteroidia      |                         |                          |
| <b>seq1853</b> | Bacteroidetes        | Bacteroidia      | Bacteroidales           |                          |
|                | <b>Bacteroidetes</b> | <b>TOTAL</b>     |                         |                          |
|                |                      |                  |                         |                          |
| <b>seq137</b>  | Cyanobacteria        | Melainabacteria  | Gastranaerophilales     |                          |
| <b>seq205</b>  | Cyanobacteria        | Melainabacteria  | Gastranaerophilales     |                          |
| <b>seq371</b>  | Cyanobacteria        | Melainabacteria  | Gastranaerophilales     |                          |
| <b>seq497</b>  | Cyanobacteria        | Melainabacteria  | Gastranaerophilales     |                          |
| <b>seq585</b>  | Cyanobacteria        | Melainabacteria  | Gastranaerophilales     |                          |
| <b>seq757</b>  | Cyanobacteria        | Melainabacteria  | Gastranaerophilales     |                          |
| <b>seq835</b>  | Cyanobacteria        | Melainabacteria  | Gastranaerophilales     |                          |
| <b>seq1218</b> | Cyanobacteria        | Melainabacteria  | Gastranaerophilales     |                          |
| <b>seq1332</b> | Cyanobacteria        | Melainabacteria  | Gastranaerophilales     |                          |
| <b>seq1495</b> | Cyanobacteria        | Oxyphotobacteria | Chloroplast             |                          |
| <b>seq1582</b> | Cyanobacteria        | Oxyphotobacteria | Chloroplast             |                          |
|                | <b>Cyanobacteria</b> | <b>TOTAL</b>     |                         |                          |
|                |                      |                  |                         |                          |
| <b>seq1823</b> | Epsilonbacteraeota   | Campylobacteria  | Campylobacterales       | Campylobacteraceae       |
|                |                      |                  |                         |                          |
| <b>seq84</b>   | Euryarchaeota        | Methanobacteria  | Methanobacteriales      | Methanobacteriaceae      |
| <b>seq348</b>  | Euryarchaeota        | Methanobacteria  | Methanobacteriales      | Methanobacteriaceae      |
| <b>seq1411</b> | Euryarchaeota        | Thermoplasmata   | Methanomassiliicoccales | Methanomassiliicoccaceae |
| <b>seq794</b>  | Euryarchaeota        | Thermoplasmata   | Methanomassiliicoccales | Methanomethylophilaceae  |
|                | <b>Euryarchaeota</b> | <b>TOTAL</b>     |                         |                          |
|                |                      |                  |                         |                          |
| <b>seq50</b>   | Firmicutes           | Negativicutes    | Selenomonadales         | Acidaminococcaceae       |
| <b>seq206</b>  | Firmicutes           | Negativicutes    | Selenomonadales         | Acidaminococcaceae       |
| <b>seq481</b>  | Firmicutes           | Negativicutes    | Selenomonadales         | Acidaminococcaceae       |

Sequence Count Table

|                | <b>Phylum</b>        | <b>Class</b>     | <b>Genus</b>          | <b>Species</b> |
|----------------|----------------------|------------------|-----------------------|----------------|
| <b>seq945</b>  | Bacteroidetes        | Bacteroidia      |                       |                |
| <b>seq1107</b> | Bacteroidetes        | Bacteroidia      |                       |                |
| <b>seq1282</b> | Bacteroidetes        | Bacteroidia      |                       |                |
| <b>seq1440</b> | Bacteroidetes        | Bacteroidia      |                       |                |
| <b>seq1670</b> | Bacteroidetes        | Bacteroidia      |                       |                |
| <b>seq1853</b> | Bacteroidetes        | Bacteroidia      |                       |                |
|                | <b>Bacteroidetes</b> | <b>TOTAL</b>     |                       |                |
|                |                      |                  |                       |                |
| <b>seq137</b>  | Cyanobacteria        | Melainabacteria  |                       |                |
| <b>seq205</b>  | Cyanobacteria        | Melainabacteria  |                       |                |
| <b>seq371</b>  | Cyanobacteria        | Melainabacteria  |                       |                |
| <b>seq497</b>  | Cyanobacteria        | Melainabacteria  |                       |                |
| <b>seq585</b>  | Cyanobacteria        | Melainabacteria  |                       |                |
| <b>seq757</b>  | Cyanobacteria        | Melainabacteria  |                       |                |
| <b>seq835</b>  | Cyanobacteria        | Melainabacteria  |                       |                |
| <b>seq1218</b> | Cyanobacteria        | Melainabacteria  |                       |                |
| <b>seq1332</b> | Cyanobacteria        | Melainabacteria  |                       |                |
| <b>seq1495</b> | Cyanobacteria        | Oxyphotobacteria |                       |                |
| <b>seq1582</b> | Cyanobacteria        | Oxyphotobacteria |                       |                |
|                | <b>Cyanobacteria</b> | <b>TOTAL</b>     |                       |                |
|                |                      |                  |                       |                |
| <b>seq1823</b> | Epsilonbacteraeota   | Campylobacteria  | Campylobacter         | hominis        |
|                |                      |                  |                       |                |
| <b>seq84</b>   | Euryarchaeota        | Methanobacteria  | Methanobrevibacter    |                |
| <b>seq348</b>  | Euryarchaeota        | Methanobacteria  | Methanosphaera        |                |
| <b>seq1411</b> | Euryarchaeota        | Thermoplasmata   | Methanomassiliicoccus |                |
| <b>seq794</b>  | Euryarchaeota        | Thermoplasmata   |                       |                |
|                | <b>Euryarchaeota</b> | <b>TOTAL</b>     |                       |                |
|                |                      |                  |                       |                |
| <b>seq50</b>   | Firmicutes           | Negativicutes    | Acidaminococcus       | intestini      |
| <b>seq206</b>  | Firmicutes           | Negativicutes    | Acidaminococcus       |                |
| <b>seq481</b>  | Firmicutes           | Negativicutes    | Acidaminococcus       |                |

Sequence Count Table

|         | Phylum               | Class            | Subject34WK0 | Subject34WK12 | Subject16WK0 | Subject16WK12 |
|---------|----------------------|------------------|--------------|---------------|--------------|---------------|
| seq945  | Bacteroidetes        | Bacteroidia      | 0            | 0             | 0            | 0             |
| seq1107 | Bacteroidetes        | Bacteroidia      | 0            | 0             | 0            | 0             |
| seq1282 | Bacteroidetes        | Bacteroidia      | 0            | 0             | 0            | 0             |
| seq1440 | Bacteroidetes        | Bacteroidia      | 0            | 0             | 0            | 0             |
| seq1670 | Bacteroidetes        | Bacteroidia      | 0            | 14            | 0            | 0             |
| seq1853 | Bacteroidetes        | Bacteroidia      | 0            | 0             | 0            | 0             |
|         | <b>Bacteroidetes</b> | <b>TOTAL</b>     | <b>3223</b>  | <b>33380</b>  | <b>72304</b> | <b>44230</b>  |
|         |                      |                  |              |               |              |               |
| seq137  | Cyanobacteria        | Melainabacteria  | 0            | 0             | 0            | 0             |
| seq205  | Cyanobacteria        | Melainabacteria  | 0            | 0             | 0            | 0             |
| seq371  | Cyanobacteria        | Melainabacteria  | 0            | 0             | 0            | 0             |
| seq497  | Cyanobacteria        | Melainabacteria  | 66           | 19            | 0            | 0             |
| seq585  | Cyanobacteria        | Melainabacteria  | 0            | 0             | 0            | 0             |
| seq757  | Cyanobacteria        | Melainabacteria  | 0            | 0             | 0            | 0             |
| seq835  | Cyanobacteria        | Melainabacteria  | 0            | 0             | 0            | 0             |
| seq1218 | Cyanobacteria        | Melainabacteria  | 0            | 0             | 0            | 0             |
| seq1332 | Cyanobacteria        | Melainabacteria  | 0            | 0             | 0            | 0             |
| seq1495 | Cyanobacteria        | Oxyphotobacteria | 0            | 0             | 0            | 0             |
| seq1582 | Cyanobacteria        | Oxyphotobacteria | 0            | 0             | 0            | 0             |
|         | <b>Cyanobacteria</b> | <b>TOTAL</b>     | <b>66</b>    | <b>19</b>     | <b>0</b>     | <b>0</b>      |
|         |                      |                  |              |               |              |               |
| seq1823 | Epsilonbacteraeota   | Campylobacteria  | 0            | 0             | 0            | 0             |
|         |                      |                  |              |               |              |               |
| seq84   | Euryarchaeota        | Methanobacteria  | 0            | 744           | 0            | 0             |
| seq348  | Euryarchaeota        | Methanobacteria  | 0            | 0             | 0            | 0             |
| seq1411 | Euryarchaeota        | Thermoplasmata   | 0            | 0             | 0            | 0             |
| seq794  | Euryarchaeota        | Thermoplasmata   | 0            | 0             | 0            | 0             |
|         | <b>Euryarchaeota</b> | <b>TOTAL</b>     | <b>0</b>     | <b>744</b>    | <b>0</b>     | <b>0</b>      |
|         |                      |                  |              |               |              |               |
| seq50   | Firmicutes           | Negativicutes    | 0            | 0             | 0            | 0             |
| seq206  | Firmicutes           | Negativicutes    | 0            | 0             | 0            | 0             |
| seq481  | Firmicutes           | Negativicutes    | 0            | 0             | 0            | 0             |

Sequence Count Table

|         | Phylum               | Class            | Subject17WK0 | Subject17WK12 | Subject1WK0  | Subject1WK12 |
|---------|----------------------|------------------|--------------|---------------|--------------|--------------|
| seq945  | Bacteroidetes        | Bacteroidia      | 0            | 0             | 0            | 0            |
| seq1107 | Bacteroidetes        | Bacteroidia      | 0            | 0             | 0            | 0            |
| seq1282 | Bacteroidetes        | Bacteroidia      | 0            | 0             | 0            | 0            |
| seq1440 | Bacteroidetes        | Bacteroidia      | 0            | 35            | 0            | 0            |
| seq1670 | Bacteroidetes        | Bacteroidia      | 0            | 0             | 0            | 0            |
| seq1853 | Bacteroidetes        | Bacteroidia      | 0            | 0             | 0            | 0            |
|         | <b>Bacteroidetes</b> | <b>TOTAL</b>     | <b>33654</b> | <b>44180</b>  | <b>28867</b> | <b>32429</b> |
|         |                      |                  |              |               |              |              |
| seq137  | Cyanobacteria        | Melainabacteria  | 0            | 0             | 4846         | 5240         |
| seq205  | Cyanobacteria        | Melainabacteria  | 0            | 0             | 0            | 0            |
| seq371  | Cyanobacteria        | Melainabacteria  | 0            | 0             | 0            | 0            |
| seq497  | Cyanobacteria        | Melainabacteria  | 0            | 0             | 0            | 0            |
| seq585  | Cyanobacteria        | Melainabacteria  | 0            | 0             | 0            | 0            |
| seq757  | Cyanobacteria        | Melainabacteria  | 0            | 0             | 0            | 0            |
| seq835  | Cyanobacteria        | Melainabacteria  | 0            | 0             | 0            | 0            |
| seq1218 | Cyanobacteria        | Melainabacteria  | 0            | 0             | 0            | 74           |
| seq1332 | Cyanobacteria        | Melainabacteria  | 0            | 0             | 0            | 0            |
| seq1495 | Cyanobacteria        | Oxyphotobacteria | 0            | 0             | 0            | 0            |
| seq1582 | Cyanobacteria        | Oxyphotobacteria | 0            | 0             | 0            | 0            |
|         | <b>Cyanobacteria</b> | <b>TOTAL</b>     | <b>0</b>     | <b>0</b>      | <b>4846</b>  | <b>5314</b>  |
|         |                      |                  |              |               |              |              |
| seq1823 | Epsilonbacteraeota   | Campylobacteria  | 0            | 0             | 0            | 0            |
|         |                      |                  |              |               |              |              |
| seq84   | Euryarchaeota        | Methanobacteria  | 0            | 0             | 0            | 0            |
| seq348  | Euryarchaeota        | Methanobacteria  | 0            | 0             | 0            | 0            |
| seq1411 | Euryarchaeota        | Thermoplasmata   | 0            | 0             | 0            | 0            |
| seq794  | Euryarchaeota        | Thermoplasmata   | 0            | 0             | 0            | 0            |
|         | <b>Euryarchaeota</b> | <b>TOTAL</b>     | <b>0</b>     | <b>0</b>      | <b>0</b>     | <b>0</b>     |
|         |                      |                  |              |               |              |              |
| seq50   | Firmicutes           | Negativicutes    | 0            | 0             | 0            | 0            |
| seq206  | Firmicutes           | Negativicutes    | 0            | 0             | 209          | 227          |
| seq481  | Firmicutes           | Negativicutes    | 0            | 0             | 0            | 0            |

Sequence Count Table

|         | Phylum               | Class            | Subject2WK0  | Subject2WK12 | Subject3WK0  | Subject3WK12 |
|---------|----------------------|------------------|--------------|--------------|--------------|--------------|
| seq945  | Bacteroidetes        | Bacteroidia      | 0            | 0            | 0            | 0            |
| seq1107 | Bacteroidetes        | Bacteroidia      | 0            | 0            | 0            | 0            |
| seq1282 | Bacteroidetes        | Bacteroidia      | 0            | 0            | 0            | 0            |
| seq1440 | Bacteroidetes        | Bacteroidia      | 0            | 0            | 0            | 0            |
| seq1670 | Bacteroidetes        | Bacteroidia      | 0            | 0            | 0            | 0            |
| seq1853 | Bacteroidetes        | Bacteroidia      | 0            | 0            | 0            | 0            |
|         | <b>Bacteroidetes</b> | <b>TOTAL</b>     | <b>31591</b> | <b>30393</b> | <b>30328</b> | <b>41313</b> |
|         |                      |                  |              |              |              |              |
| seq137  | Cyanobacteria        | Melainabacteria  | 0            | 0            | 0            | 0            |
| seq205  | Cyanobacteria        | Melainabacteria  | 0            | 0            | 0            | 0            |
| seq371  | Cyanobacteria        | Melainabacteria  | 0            | 0            | 0            | 0            |
| seq497  | Cyanobacteria        | Melainabacteria  | 0            | 0            | 0            | 0            |
| seq585  | Cyanobacteria        | Melainabacteria  | 0            | 0            | 0            | 0            |
| seq757  | Cyanobacteria        | Melainabacteria  | 0            | 0            | 0            | 0            |
| seq835  | Cyanobacteria        | Melainabacteria  | 0            | 0            | 0            | 0            |
| seq1218 | Cyanobacteria        | Melainabacteria  | 0            | 0            | 0            | 0            |
| seq1332 | Cyanobacteria        | Melainabacteria  | 0            | 0            | 0            | 0            |
| seq1495 | Cyanobacteria        | Oxyphotobacteria | 0            | 0            | 0            | 0            |
| seq1582 | Cyanobacteria        | Oxyphotobacteria | 0            | 0            | 0            | 0            |
|         | <b>Cyanobacteria</b> | <b>TOTAL</b>     | <b>0</b>     | <b>0</b>     | <b>0</b>     | <b>0</b>     |
|         |                      |                  |              |              |              |              |
| seq1823 | Epsilonbacteraeota   | Campylobacteria  | 0            | 0            | 0            | 0            |
|         |                      |                  |              |              |              |              |
| seq84   | Euryarchaeota        | Methanobacteria  | 0            | 0            | 0            | 0            |
| seq348  | Euryarchaeota        | Methanobacteria  | 0            | 0            | 0            | 0            |
| seq1411 | Euryarchaeota        | Thermoplasmata   | 0            | 0            | 0            | 0            |
| seq794  | Euryarchaeota        | Thermoplasmata   | 0            | 0            | 0            | 0            |
|         | <b>Euryarchaeota</b> | <b>TOTAL</b>     | <b>0</b>     | <b>0</b>     | <b>0</b>     | <b>0</b>     |
|         |                      |                  |              |              |              |              |
| seq50   | Firmicutes           | Negativicutes    | 0            | 0            | 0            | 0            |
| seq206  | Firmicutes           | Negativicutes    | 0            | 0            | 0            | 0            |
| seq481  | Firmicutes           | Negativicutes    | 0            | 0            | 0            | 0            |

Sequence Count Table

|         | Phylum               | Class            | Subject4WK0  | Subject4WK12 | Subject5WK0  | Subject5WK12 |
|---------|----------------------|------------------|--------------|--------------|--------------|--------------|
| seq945  | Bacteroidetes        | Bacteroidia      | 0            | 0            | 0            | 0            |
| seq1107 | Bacteroidetes        | Bacteroidia      | 0            | 0            | 0            | 0            |
| seq1282 | Bacteroidetes        | Bacteroidia      | 0            | 0            | 0            | 0            |
| seq1440 | Bacteroidetes        | Bacteroidia      | 0            | 0            | 0            | 0            |
| seq1670 | Bacteroidetes        | Bacteroidia      | 0            | 0            | 0            | 0            |
| seq1853 | Bacteroidetes        | Bacteroidia      | 0            | 0            | 0            | 0            |
|         | <b>Bacteroidetes</b> | <b>TOTAL</b>     | <b>39976</b> | <b>59674</b> | <b>41221</b> | <b>43885</b> |
|         |                      |                  |              |              |              |              |
| seq137  | Cyanobacteria        | Melainabacteria  | 0            | 0            | 0            | 0            |
| seq205  | Cyanobacteria        | Melainabacteria  | 0            | 0            | 0            | 0            |
| seq371  | Cyanobacteria        | Melainabacteria  | 0            | 0            | 0            | 0            |
| seq497  | Cyanobacteria        | Melainabacteria  | 0            | 0            | 0            | 0            |
| seq585  | Cyanobacteria        | Melainabacteria  | 0            | 0            | 0            | 0            |
| seq757  | Cyanobacteria        | Melainabacteria  | 0            | 0            | 0            | 0            |
| seq835  | Cyanobacteria        | Melainabacteria  | 0            | 0            | 0            | 0            |
| seq1218 | Cyanobacteria        | Melainabacteria  | 0            | 0            | 0            | 0            |
| seq1332 | Cyanobacteria        | Melainabacteria  | 0            | 0            | 0            | 0            |
| seq1495 | Cyanobacteria        | Oxyphotobacteria | 0            | 0            | 0            | 0            |
| seq1582 | Cyanobacteria        | Oxyphotobacteria | 0            | 0            | 0            | 0            |
|         | <b>Cyanobacteria</b> | <b>TOTAL</b>     | <b>0</b>     | <b>0</b>     | <b>0</b>     | <b>0</b>     |
|         |                      |                  |              |              |              |              |
| seq1823 | Epsilonbacteraeota   | Campylobacteria  | 0            | 0            | 0            | 0            |
|         |                      |                  |              |              |              |              |
| seq84   | Euryarchaeota        | Methanobacteria  | 0            | 0            | 0            | 0            |
| seq348  | Euryarchaeota        | Methanobacteria  | 0            | 0            | 0            | 0            |
| seq1411 | Euryarchaeota        | Thermoplasmata   | 0            | 0            | 0            | 0            |
| seq794  | Euryarchaeota        | Thermoplasmata   | 0            | 0            | 0            | 0            |
|         | <b>Euryarchaeota</b> | <b>TOTAL</b>     | <b>0</b>     | <b>0</b>     | <b>0</b>     | <b>0</b>     |
|         |                      |                  |              |              |              |              |
| seq50   | Firmicutes           | Negativicutes    | 824          | 3206         | 0            | 0            |
| seq206  | Firmicutes           | Negativicutes    | 0            | 0            | 0            | 0            |
| seq481  | Firmicutes           | Negativicutes    | 0            | 0            | 0            | 0            |

Sequence Count Table

|         | Phylum               | Class            | Subject6WK0  | Subject6WK12 | Subject18WK0 | Subject18WK12 |
|---------|----------------------|------------------|--------------|--------------|--------------|---------------|
| seq945  | Bacteroidetes        | Bacteroidia      | 68           | 100          | 0            | 0             |
| seq1107 | Bacteroidetes        | Bacteroidia      | 0            | 0            | 0            | 0             |
| seq1282 | Bacteroidetes        | Bacteroidia      | 0            | 0            | 0            | 0             |
| seq1440 | Bacteroidetes        | Bacteroidia      | 0            | 0            | 0            | 0             |
| seq1670 | Bacteroidetes        | Bacteroidia      | 0            | 0            | 0            | 0             |
| seq1853 | Bacteroidetes        | Bacteroidia      | 0            | 0            | 0            | 0             |
|         | <b>Bacteroidetes</b> | <b>TOTAL</b>     | <b>18060</b> | <b>24926</b> | <b>69566</b> | <b>51890</b>  |
|         |                      |                  |              |              |              |               |
| seq137  | Cyanobacteria        | Melainabacteria  | 0            | 0            | 0            | 0             |
| seq205  | Cyanobacteria        | Melainabacteria  | 0            | 0            | 0            | 0             |
| seq371  | Cyanobacteria        | Melainabacteria  | 0            | 0            | 0            | 0             |
| seq497  | Cyanobacteria        | Melainabacteria  | 0            | 0            | 0            | 0             |
| seq585  | Cyanobacteria        | Melainabacteria  | 0            | 0            | 0            | 0             |
| seq757  | Cyanobacteria        | Melainabacteria  | 0            | 0            | 0            | 0             |
| seq835  | Cyanobacteria        | Melainabacteria  | 0            | 0            | 0            | 0             |
| seq1218 | Cyanobacteria        | Melainabacteria  | 0            | 0            | 0            | 0             |
| seq1332 | Cyanobacteria        | Melainabacteria  | 0            | 0            | 0            | 0             |
| seq1495 | Cyanobacteria        | Oxyphotobacteria | 0            | 0            | 0            | 0             |
| seq1582 | Cyanobacteria        | Oxyphotobacteria | 0            | 0            | 0            | 0             |
|         | <b>Cyanobacteria</b> | <b>TOTAL</b>     | <b>0</b>     | <b>0</b>     | <b>0</b>     | <b>0</b>      |
|         |                      |                  |              |              |              |               |
| seq1823 | Epsilonbacteraeota   | Campylobacteria  | 0            | 0            | 0            | 0             |
|         |                      |                  |              |              |              |               |
| seq84   | Euryarchaeota        | Methanobacteria  | 1502         | 759          | 13           | 0             |
| seq348  | Euryarchaeota        | Methanobacteria  | 0            | 0            | 0            | 0             |
| seq1411 | Euryarchaeota        | Thermoplasmata   | 0            | 0            | 0            | 0             |
| seq794  | Euryarchaeota        | Thermoplasmata   | 0            | 0            | 0            | 0             |
|         | <b>Euryarchaeota</b> | <b>TOTAL</b>     | <b>1502</b>  | <b>759</b>   | <b>13</b>    | <b>0</b>      |
|         |                      |                  |              |              |              |               |
| seq50   | Firmicutes           | Negativicutes    | 0            | 0            | 5518         | 8824          |
| seq206  | Firmicutes           | Negativicutes    | 0            | 0            | 0            | 0             |
| seq481  | Firmicutes           | Negativicutes    | 0            | 0            | 0            | 0             |



Sequence Count Table

|         | Phylum               | Class            | Subject19WK0 | Subject19WK12 | Subject20WK0 | Subject20WK12 |
|---------|----------------------|------------------|--------------|---------------|--------------|---------------|
| seq945  | Bacteroidetes        | Bacteroidia      | 0            | 0             | 0            | 0             |
| seq1107 | Bacteroidetes        | Bacteroidia      | 0            | 0             | 0            | 0             |
| seq1282 | Bacteroidetes        | Bacteroidia      | 0            | 0             | 0            | 0             |
| seq1440 | Bacteroidetes        | Bacteroidia      | 0            | 0             | 0            | 0             |
| seq1670 | Bacteroidetes        | Bacteroidia      | 0            | 0             | 0            | 0             |
| seq1853 | Bacteroidetes        | Bacteroidia      | 0            | 0             | 0            | 0             |
|         | <b>Bacteroidetes</b> | <b>TOTAL</b>     | <b>44290</b> | <b>55267</b>  | <b>41871</b> | <b>46912</b>  |
|         |                      |                  |              |               |              |               |
| seq137  | Cyanobacteria        | Melainabacteria  | 0            | 0             | 0            | 0             |
| seq205  | Cyanobacteria        | Melainabacteria  | 0            | 0             | 0            | 0             |
| seq371  | Cyanobacteria        | Melainabacteria  | 0            | 0             | 0            | 0             |
| seq497  | Cyanobacteria        | Melainabacteria  | 0            | 0             | 0            | 0             |
| seq585  | Cyanobacteria        | Melainabacteria  | 0            | 0             | 0            | 0             |
| seq757  | Cyanobacteria        | Melainabacteria  | 0            | 0             | 0            | 0             |
| seq835  | Cyanobacteria        | Melainabacteria  | 0            | 0             | 0            | 0             |
| seq1218 | Cyanobacteria        | Melainabacteria  | 0            | 0             | 0            | 0             |
| seq1332 | Cyanobacteria        | Melainabacteria  | 0            | 0             | 0            | 0             |
| seq1495 | Cyanobacteria        | Oxyphotobacteria | 0            | 0             | 0            | 0             |
| seq1582 | Cyanobacteria        | Oxyphotobacteria | 21           | 0             | 0            | 0             |
|         | <b>Cyanobacteria</b> | <b>TOTAL</b>     | <b>21</b>    | <b>0</b>      | <b>0</b>     | <b>0</b>      |
|         |                      |                  |              |               |              |               |
| seq1823 | Epsilonbacteraeota   | Campylobacteria  | 0            | 0             | 0            | 0             |
|         |                      |                  |              |               |              |               |
| seq84   | Euryarchaeota        | Methanobacteria  | 0            | 0             | 1204         | 564           |
| seq348  | Euryarchaeota        | Methanobacteria  | 0            | 0             | 0            | 0             |
| seq1411 | Euryarchaeota        | Thermoplasmata   | 0            | 0             | 0            | 0             |
| seq794  | Euryarchaeota        | Thermoplasmata   | 0            | 0             | 246          | 30            |
|         | <b>Euryarchaeota</b> | <b>TOTAL</b>     | <b>0</b>     | <b>0</b>      | <b>1450</b>  | <b>594</b>    |
|         |                      |                  |              |               |              |               |
| seq50   | Firmicutes           | Negativicutes    | 0            | 0             | 0            | 0             |
| seq206  | Firmicutes           | Negativicutes    | 0            | 0             | 0            | 0             |
| seq481  | Firmicutes           | Negativicutes    | 0            | 0             | 0            | 0             |

Sequence Count Table

|         | Phylum               | Class            | Subject7WK0  | Subject7WK12 | Subject21WK0 | Subject21WK12 |
|---------|----------------------|------------------|--------------|--------------|--------------|---------------|
| seq945  | Bacteroidetes        | Bacteroidia      | 0            | 0            | 0            | 0             |
| seq1107 | Bacteroidetes        | Bacteroidia      | 0            | 0            | 0            | 0             |
| seq1282 | Bacteroidetes        | Bacteroidia      | 0            | 0            | 0            | 0             |
| seq1440 | Bacteroidetes        | Bacteroidia      | 0            | 0            | 0            | 0             |
| seq1670 | Bacteroidetes        | Bacteroidia      | 0            | 0            | 0            | 0             |
| seq1853 | Bacteroidetes        | Bacteroidia      | 0            | 0            | 0            | 5             |
|         | <b>Bacteroidetes</b> | <b>TOTAL</b>     | <b>30431</b> | <b>56898</b> | <b>27992</b> | <b>54498</b>  |
|         |                      |                  |              |              |              |               |
| seq137  | Cyanobacteria        | Melainabacteria  | 0            | 0            | 0            | 0             |
| seq205  | Cyanobacteria        | Melainabacteria  | 0            | 0            | 0            | 0             |
| seq371  | Cyanobacteria        | Melainabacteria  | 0            | 0            | 0            | 0             |
| seq497  | Cyanobacteria        | Melainabacteria  | 0            | 0            | 0            | 0             |
| seq585  | Cyanobacteria        | Melainabacteria  | 0            | 0            | 0            | 0             |
| seq757  | Cyanobacteria        | Melainabacteria  | 0            | 0            | 0            | 0             |
| seq835  | Cyanobacteria        | Melainabacteria  | 0            | 0            | 0            | 0             |
| seq1218 | Cyanobacteria        | Melainabacteria  | 0            | 0            | 0            | 0             |
| seq1332 | Cyanobacteria        | Melainabacteria  | 0            | 0            | 0            | 0             |
| seq1495 | Cyanobacteria        | Oxyphotobacteria | 0            | 0            | 0            | 0             |
| seq1582 | Cyanobacteria        | Oxyphotobacteria | 0            | 0            | 0            | 0             |
|         | <b>Cyanobacteria</b> | <b>TOTAL</b>     | <b>0</b>     | <b>0</b>     | <b>0</b>     | <b>0</b>      |
|         |                      |                  |              |              |              |               |
| seq1823 | Epsilonbacteraeota   | Campylobacteria  | 0            | 0            | 0            | 0             |
|         |                      |                  |              |              |              |               |
| seq84   | Euryarchaeota        | Methanobacteria  | 0            | 0            | 0            | 0             |
| seq348  | Euryarchaeota        | Methanobacteria  | 0            | 0            | 0            | 0             |
| seq1411 | Euryarchaeota        | Thermoplasmata   | 0            | 0            | 0            | 0             |
| seq794  | Euryarchaeota        | Thermoplasmata   | 0            | 0            | 0            | 0             |
|         | <b>Euryarchaeota</b> | <b>TOTAL</b>     | <b>0</b>     | <b>0</b>     | <b>0</b>     | <b>0</b>      |
|         |                      |                  |              |              |              |               |
| seq50   | Firmicutes           | Negativicutes    | 1974         | 4474         | 0            | 0             |
| seq206  | Firmicutes           | Negativicutes    | 0            | 0            | 1958         | 2440          |
| seq481  | Firmicutes           | Negativicutes    | 0            | 0            | 364          | 461           |

Sequence Count Table

|         | Phylum               | Class            | Subject8WK0  | Subject8WK12 | Subject9WK0  | Subject9WK12 |
|---------|----------------------|------------------|--------------|--------------|--------------|--------------|
| seq945  | Bacteroidetes        | Bacteroidia      | 0            | 0            | 0            | 0            |
| seq1107 | Bacteroidetes        | Bacteroidia      | 0            | 0            | 0            | 0            |
| seq1282 | Bacteroidetes        | Bacteroidia      | 0            | 0            | 0            | 0            |
| seq1440 | Bacteroidetes        | Bacteroidia      | 0            | 0            | 0            | 0            |
| seq1670 | Bacteroidetes        | Bacteroidia      | 0            | 0            | 0            | 0            |
| seq1853 | Bacteroidetes        | Bacteroidia      | 0            | 0            | 0            | 0            |
|         | <b>Bacteroidetes</b> | <b>TOTAL</b>     | <b>36372</b> | <b>43882</b> | <b>29727</b> | <b>54229</b> |
|         |                      |                  |              |              |              |              |
| seq137  | Cyanobacteria        | Melainabacteria  | 0            | 0            | 0            | 0            |
| seq205  | Cyanobacteria        | Melainabacteria  | 0            | 0            | 0            | 0            |
| seq371  | Cyanobacteria        | Melainabacteria  | 0            | 0            | 0            | 0            |
| seq497  | Cyanobacteria        | Melainabacteria  | 0            | 0            | 0            | 0            |
| seq585  | Cyanobacteria        | Melainabacteria  | 0            | 0            | 0            | 0            |
| seq757  | Cyanobacteria        | Melainabacteria  | 0            | 0            | 0            | 0            |
| seq835  | Cyanobacteria        | Melainabacteria  | 0            | 0            | 0            | 0            |
| seq1218 | Cyanobacteria        | Melainabacteria  | 0            | 0            | 0            | 0            |
| seq1332 | Cyanobacteria        | Melainabacteria  | 0            | 0            | 0            | 0            |
| seq1495 | Cyanobacteria        | Oxyphotobacteria | 0            | 0            | 0            | 0            |
| seq1582 | Cyanobacteria        | Oxyphotobacteria | 0            | 0            | 0            | 0            |
|         | <b>Cyanobacteria</b> | <b>TOTAL</b>     | <b>0</b>     | <b>0</b>     | <b>0</b>     | <b>0</b>     |
|         |                      |                  |              |              |              |              |
| seq1823 | Epsilonbacteraeota   | Campylobacteria  | 0            | 0            | 0            | 0            |
|         |                      |                  |              |              |              |              |
| seq84   | Euryarchaeota        | Methanobacteria  | 0            | 0            | 0            | 0            |
| seq348  | Euryarchaeota        | Methanobacteria  | 0            | 0            | 0            | 0            |
| seq1411 | Euryarchaeota        | Thermoplasmata   | 0            | 0            | 0            | 0            |
| seq794  | Euryarchaeota        | Thermoplasmata   | 0            | 0            | 0            | 0            |
|         | <b>Euryarchaeota</b> | <b>TOTAL</b>     | <b>0</b>     | <b>0</b>     | <b>0</b>     | <b>0</b>     |
|         |                      |                  |              |              |              |              |
| seq50   | Firmicutes           | Negativicutes    | 0            | 0            | 398          | 3051         |
| seq206  | Firmicutes           | Negativicutes    | 0            | 0            | 0            | 0            |
| seq481  | Firmicutes           | Negativicutes    | 0            | 0            | 0            | 0            |

Sequence Count Table

|         | Phylum               | Class            | Subject10WK0 | Subject10WK12 | Subject22WK0 | Subject22WK12 |
|---------|----------------------|------------------|--------------|---------------|--------------|---------------|
| seq945  | Bacteroidetes        | Bacteroidia      | 0            | 0             | 0            | 0             |
| seq1107 | Bacteroidetes        | Bacteroidia      | 0            | 0             | 0            | 0             |
| seq1282 | Bacteroidetes        | Bacteroidia      | 0            | 0             | 0            | 0             |
| seq1440 | Bacteroidetes        | Bacteroidia      | 0            | 0             | 0            | 0             |
| seq1670 | Bacteroidetes        | Bacteroidia      | 0            | 0             | 0            | 0             |
| seq1853 | Bacteroidetes        | Bacteroidia      | 0            | 0             | 0            | 0             |
|         | <b>Bacteroidetes</b> | <b>TOTAL</b>     | <b>31117</b> | <b>19331</b>  | <b>9065</b>  | <b>8522</b>   |
|         |                      |                  |              |               |              |               |
| seq137  | Cyanobacteria        | Melainabacteria  | 0            | 0             | 0            | 0             |
| seq205  | Cyanobacteria        | Melainabacteria  | 1872         | 3034          | 0            | 0             |
| seq371  | Cyanobacteria        | Melainabacteria  | 0            | 0             | 0            | 0             |
| seq497  | Cyanobacteria        | Melainabacteria  | 0            | 0             | 0            | 0             |
| seq585  | Cyanobacteria        | Melainabacteria  | 0            | 0             | 0            | 0             |
| seq757  | Cyanobacteria        | Melainabacteria  | 0            | 0             | 0            | 0             |
| seq835  | Cyanobacteria        | Melainabacteria  | 0            | 0             | 0            | 0             |
| seq1218 | Cyanobacteria        | Melainabacteria  | 0            | 0             | 0            | 0             |
| seq1332 | Cyanobacteria        | Melainabacteria  | 0            | 51            | 0            | 0             |
| seq1495 | Cyanobacteria        | Oxyphotobacteria | 0            | 0             | 0            | 0             |
| seq1582 | Cyanobacteria        | Oxyphotobacteria | 0            | 0             | 0            | 0             |
|         | <b>Cyanobacteria</b> | <b>TOTAL</b>     | <b>1872</b>  | <b>3085</b>   | <b>0</b>     | <b>0</b>      |
|         |                      |                  |              |               |              |               |
| seq1823 | Epsilonbacteraeota   | Campylobacteria  | 0            | 0             | 0            | 0             |
|         |                      |                  |              |               |              |               |
| seq84   | Euryarchaeota        | Methanobacteria  | 0            | 0             | 2772         | 1272          |
| seq348  | Euryarchaeota        | Methanobacteria  | 0            | 0             | 818          | 562           |
| seq1411 | Euryarchaeota        | Thermoplasmata   | 0            | 0             | 0            | 0             |
| seq794  | Euryarchaeota        | Thermoplasmata   | 0            | 0             | 0            | 0             |
|         | <b>Euryarchaeota</b> | <b>TOTAL</b>     | <b>0</b>     | <b>0</b>      | <b>3590</b>  | <b>1834</b>   |
|         |                      |                  |              |               |              |               |
| seq50   | Firmicutes           | Negativicutes    | 0            | 0             | 0            | 25            |
| seq206  | Firmicutes           | Negativicutes    | 0            | 0             | 0            | 0             |
| seq481  | Firmicutes           | Negativicutes    | 0            | 0             | 0            | 0             |

Sequence Count Table

|         | Phylum               | Class            | Subject23WK0 | Subject23WK12 | Subject24WK0 | Subject24WK12 |
|---------|----------------------|------------------|--------------|---------------|--------------|---------------|
| seq945  | Bacteroidetes        | Bacteroidia      | 0            | 0             | 0            | 0             |
| seq1107 | Bacteroidetes        | Bacteroidia      | 0            | 0             | 0            | 0             |
| seq1282 | Bacteroidetes        | Bacteroidia      | 29           | 32            | 0            | 0             |
| seq1440 | Bacteroidetes        | Bacteroidia      | 0            | 0             | 0            | 0             |
| seq1670 | Bacteroidetes        | Bacteroidia      | 0            | 0             | 0            | 0             |
| seq1853 | Bacteroidetes        | Bacteroidia      | 0            | 0             | 0            | 0             |
|         | <b>Bacteroidetes</b> | <b>TOTAL</b>     | <b>12150</b> | <b>17633</b>  | <b>21455</b> | <b>37459</b>  |
|         |                      |                  |              |               |              |               |
| seq137  | Cyanobacteria        | Melainabacteria  | 0            | 0             | 0            | 0             |
| seq205  | Cyanobacteria        | Melainabacteria  | 0            | 0             | 0            | 0             |
| seq371  | Cyanobacteria        | Melainabacteria  | 736          | 706           | 0            | 0             |
| seq497  | Cyanobacteria        | Melainabacteria  | 279          | 186           | 0            | 0             |
| seq585  | Cyanobacteria        | Melainabacteria  | 333          | 240           | 0            | 0             |
| seq757  | Cyanobacteria        | Melainabacteria  | 91           | 218           | 0            | 0             |
| seq835  | Cyanobacteria        | Melainabacteria  | 167          | 69            | 0            | 0             |
| seq1218 | Cyanobacteria        | Melainabacteria  | 0            | 0             | 0            | 0             |
| seq1332 | Cyanobacteria        | Melainabacteria  | 0            | 0             | 0            | 0             |
| seq1495 | Cyanobacteria        | Oxyphotobacteria | 0            | 0             | 0            | 0             |
| seq1582 | Cyanobacteria        | Oxyphotobacteria | 0            | 0             | 0            | 0             |
|         | <b>Cyanobacteria</b> | <b>TOTAL</b>     | <b>1606</b>  | <b>1419</b>   | <b>0</b>     | <b>0</b>      |
|         |                      |                  |              |               |              |               |
| seq1823 | Epsilonbacteraeota   | Campylobacteria  | 0            | 0             | 0            | 0             |
|         |                      |                  |              |               |              |               |
| seq84   | Euryarchaeota        | Methanobacteria  | 84           | 202           | 0            | 0             |
| seq348  | Euryarchaeota        | Methanobacteria  | 40           | 154           | 0            | 0             |
| seq1411 | Euryarchaeota        | Thermoplasmata   | 0            | 0             | 0            | 0             |
| seq794  | Euryarchaeota        | Thermoplasmata   | 0            | 0             | 0            | 0             |
|         | <b>Euryarchaeota</b> | <b>TOTAL</b>     | <b>124</b>   | <b>356</b>    | <b>0</b>     | <b>0</b>      |
|         |                      |                  |              |               |              |               |
| seq50   | Firmicutes           | Negativicutes    | 0            | 0             | 0            | 0             |
| seq206  | Firmicutes           | Negativicutes    | 0            | 0             | 0            | 0             |
| seq481  | Firmicutes           | Negativicutes    | 0            | 0             | 0            | 0             |

Sequence Count Table

|         | Phylum               | Class            | Subject11WK0 | Subject11WK12 | Subject12WK0 | Subject12WK12 |
|---------|----------------------|------------------|--------------|---------------|--------------|---------------|
| seq945  | Bacteroidetes        | Bacteroidia      | 0            | 0             | 0            | 0             |
| seq1107 | Bacteroidetes        | Bacteroidia      | 0            | 0             | 0            | 0             |
| seq1282 | Bacteroidetes        | Bacteroidia      | 0            | 0             | 0            | 0             |
| seq1440 | Bacteroidetes        | Bacteroidia      | 0            | 0             | 0            | 0             |
| seq1670 | Bacteroidetes        | Bacteroidia      | 0            | 0             | 0            | 0             |
| seq1853 | Bacteroidetes        | Bacteroidia      | 0            | 0             | 0            | 0             |
|         | <b>Bacteroidetes</b> | <b>TOTAL</b>     | <b>27750</b> | <b>46671</b>  | <b>21767</b> | <b>41604</b>  |
|         |                      |                  |              |               |              |               |
| seq137  | Cyanobacteria        | Melainabacteria  | 0            | 0             | 0            | 0             |
| seq205  | Cyanobacteria        | Melainabacteria  | 0            | 0             | 0            | 0             |
| seq371  | Cyanobacteria        | Melainabacteria  | 0            | 0             | 0            | 0             |
| seq497  | Cyanobacteria        | Melainabacteria  | 0            | 0             | 0            | 0             |
| seq585  | Cyanobacteria        | Melainabacteria  | 0            | 0             | 0            | 0             |
| seq757  | Cyanobacteria        | Melainabacteria  | 0            | 0             | 0            | 0             |
| seq835  | Cyanobacteria        | Melainabacteria  | 0            | 0             | 0            | 0             |
| seq1218 | Cyanobacteria        | Melainabacteria  | 0            | 0             | 0            | 0             |
| seq1332 | Cyanobacteria        | Melainabacteria  | 0            | 0             | 0            | 0             |
| seq1495 | Cyanobacteria        | Oxyphotobacteria | 0            | 0             | 0            | 0             |
| seq1582 | Cyanobacteria        | Oxyphotobacteria | 0            | 0             | 0            | 0             |
|         | <b>Cyanobacteria</b> | <b>TOTAL</b>     | <b>0</b>     | <b>0</b>      | <b>0</b>     | <b>0</b>      |
|         |                      |                  |              |               |              |               |
| seq1823 | Epsilonbacteraeota   | Campylobacteria  | 0            | 0             | 0            | 0             |
|         |                      |                  |              |               |              |               |
| seq84   | Euryarchaeota        | Methanobacteria  | 0            | 0             | 0            | 6             |
| seq348  | Euryarchaeota        | Methanobacteria  | 0            | 0             | 0            | 0             |
| seq1411 | Euryarchaeota        | Thermoplasmata   | 0            | 0             | 0            | 0             |
| seq794  | Euryarchaeota        | Thermoplasmata   | 0            | 0             | 0            | 0             |
|         | <b>Euryarchaeota</b> | <b>TOTAL</b>     | <b>0</b>     | <b>0</b>      | <b>0</b>     | <b>6</b>      |
|         |                      |                  |              |               |              |               |
| seq50   | Firmicutes           | Negativicutes    | 0            | 0             | 0            | 0             |
| seq206  | Firmicutes           | Negativicutes    | 0            | 0             | 0            | 0             |
| seq481  | Firmicutes           | Negativicutes    | 0            | 0             | 0            | 0             |

Sequence Count Table

|         | Phylum               | Class            | Subject25WK0 | Subject25WK12 | Subject38WK0 | Subject38WK12 |
|---------|----------------------|------------------|--------------|---------------|--------------|---------------|
| seq945  | Bacteroidetes        | Bacteroidia      | 0            | 0             | 0            | 0             |
| seq1107 | Bacteroidetes        | Bacteroidia      | 73           | 31            | 0            | 0             |
| seq1282 | Bacteroidetes        | Bacteroidia      | 0            | 0             | 0            | 0             |
| seq1440 | Bacteroidetes        | Bacteroidia      | 0            | 0             | 0            | 0             |
| seq1670 | Bacteroidetes        | Bacteroidia      | 0            | 0             | 0            | 0             |
| seq1853 | Bacteroidetes        | Bacteroidia      | 0            | 0             | 0            | 0             |
|         | <b>Bacteroidetes</b> | <b>TOTAL</b>     | <b>20110</b> | <b>13810</b>  | <b>65</b>    | <b>32</b>     |
|         |                      |                  |              |               |              |               |
| seq137  | Cyanobacteria        | Melainabacteria  | 0            | 0             | 0            | 0             |
| seq205  | Cyanobacteria        | Melainabacteria  | 0            | 0             | 0            | 0             |
| seq371  | Cyanobacteria        | Melainabacteria  | 0            | 0             | 0            | 0             |
| seq497  | Cyanobacteria        | Melainabacteria  | 0            | 0             | 0            | 0             |
| seq585  | Cyanobacteria        | Melainabacteria  | 0            | 0             | 0            | 0             |
| seq757  | Cyanobacteria        | Melainabacteria  | 0            | 0             | 0            | 0             |
| seq835  | Cyanobacteria        | Melainabacteria  | 0            | 0             | 0            | 0             |
| seq1218 | Cyanobacteria        | Melainabacteria  | 0            | 0             | 0            | 0             |
| seq1332 | Cyanobacteria        | Melainabacteria  | 0            | 0             | 0            | 0             |
| seq1495 | Cyanobacteria        | Oxyphotobacteria | 0            | 0             | 0            | 0             |
| seq1582 | Cyanobacteria        | Oxyphotobacteria | 0            | 0             | 0            | 0             |
|         | <b>Cyanobacteria</b> | <b>TOTAL</b>     | <b>0</b>     | <b>0</b>      | <b>0</b>     | <b>0</b>      |
|         |                      |                  |              |               |              |               |
| seq1823 | Epsilonbacteraeota   | Campylobacteria  | 0            | 0             | 0            | 0             |
|         |                      |                  |              |               |              |               |
| seq84   | Euryarchaeota        | Methanobacteria  | 3322         | 791           | 0            | 0             |
| seq348  | Euryarchaeota        | Methanobacteria  | 0            | 0             | 0            | 0             |
| seq1411 | Euryarchaeota        | Thermoplasmata   | 0            | 0             | 0            | 0             |
| seq794  | Euryarchaeota        | Thermoplasmata   | 0            | 0             | 0            | 0             |
|         | <b>Euryarchaeota</b> | <b>TOTAL</b>     | <b>3322</b>  | <b>791</b>    | <b>0</b>     | <b>0</b>      |
|         |                      |                  |              |               |              |               |
| seq50   | Firmicutes           | Negativicutes    | 0            | 0             | 0            | 0             |
| seq206  | Firmicutes           | Negativicutes    | 0            | 0             | 0            | 0             |
| seq481  | Firmicutes           | Negativicutes    | 0            | 0             | 0            | 0             |

Sequence Count Table

|         | Phylum               | Class            | Subject31WK0 | Subject31WK12 | Subject32WK0 | Subject32WK12 |
|---------|----------------------|------------------|--------------|---------------|--------------|---------------|
| seq945  | Bacteroidetes        | Bacteroidia      | 0            | 0             | 0            | 0             |
| seq1107 | Bacteroidetes        | Bacteroidia      | 0            | 0             | 0            | 0             |
| seq1282 | Bacteroidetes        | Bacteroidia      | 0            | 0             | 0            | 0             |
| seq1440 | Bacteroidetes        | Bacteroidia      | 0            | 0             | 0            | 0             |
| seq1670 | Bacteroidetes        | Bacteroidia      | 0            | 0             | 0            | 0             |
| seq1853 | Bacteroidetes        | Bacteroidia      | 0            | 0             | 0            | 0             |
|         | <b>Bacteroidetes</b> | <b>TOTAL</b>     | <b>169</b>   | <b>0</b>      | <b>20593</b> | <b>132</b>    |
|         |                      |                  |              |               |              |               |
| seq137  | Cyanobacteria        | Melainabacteria  | 0            | 0             | 0            | 0             |
| seq205  | Cyanobacteria        | Melainabacteria  | 0            | 0             | 0            | 0             |
| seq371  | Cyanobacteria        | Melainabacteria  | 0            | 0             | 0            | 0             |
| seq497  | Cyanobacteria        | Melainabacteria  | 0            | 0             | 0            | 0             |
| seq585  | Cyanobacteria        | Melainabacteria  | 0            | 0             | 0            | 0             |
| seq757  | Cyanobacteria        | Melainabacteria  | 0            | 0             | 0            | 0             |
| seq835  | Cyanobacteria        | Melainabacteria  | 0            | 0             | 0            | 0             |
| seq1218 | Cyanobacteria        | Melainabacteria  | 0            | 0             | 0            | 0             |
| seq1332 | Cyanobacteria        | Melainabacteria  | 0            | 0             | 0            | 0             |
| seq1495 | Cyanobacteria        | Oxyphotobacteria | 0            | 0             | 0            | 0             |
| seq1582 | Cyanobacteria        | Oxyphotobacteria | 0            | 0             | 0            | 0             |
|         | <b>Cyanobacteria</b> | <b>TOTAL</b>     | <b>0</b>     | <b>0</b>      | <b>0</b>     | <b>0</b>      |
|         |                      |                  |              |               |              |               |
| seq1823 | Epsilonbacteraeota   | Campylobacteria  | 0            | 0             | 0            | 0             |
|         |                      |                  |              |               |              |               |
| seq84   | Euryarchaeota        | Methanobacteria  | 0            | 0             | 0            | 0             |
| seq348  | Euryarchaeota        | Methanobacteria  | 0            | 0             | 0            | 0             |
| seq1411 | Euryarchaeota        | Thermoplasmata   | 0            | 0             | 0            | 0             |
| seq794  | Euryarchaeota        | Thermoplasmata   | 0            | 0             | 0            | 0             |
|         | <b>Euryarchaeota</b> | <b>TOTAL</b>     | <b>0</b>     | <b>0</b>      | <b>0</b>     | <b>0</b>      |
|         |                      |                  |              |               |              |               |
| seq50   | Firmicutes           | Negativicutes    | 0            | 0             | 3285         | 0             |
| seq206  | Firmicutes           | Negativicutes    | 0            | 0             | 0            | 0             |
| seq481  | Firmicutes           | Negativicutes    | 0            | 0             | 0            | 0             |



Sequence Count Table

|         | Phylum               | Class            | Subject13WK0 | Subject13WK12 | Subject39WK0 | Subject39WK12 |
|---------|----------------------|------------------|--------------|---------------|--------------|---------------|
| seq945  | Bacteroidetes        | Bacteroidia      | 0            | 0             | 0            | 0             |
| seq1107 | Bacteroidetes        | Bacteroidia      | 0            | 0             | 0            | 0             |
| seq1282 | Bacteroidetes        | Bacteroidia      | 0            | 0             | 0            | 0             |
| seq1440 | Bacteroidetes        | Bacteroidia      | 0            | 0             | 0            | 0             |
| seq1670 | Bacteroidetes        | Bacteroidia      | 0            | 0             | 0            | 0             |
| seq1853 | Bacteroidetes        | Bacteroidia      | 0            | 0             | 0            | 0             |
|         | <b>Bacteroidetes</b> | <b>TOTAL</b>     | <b>26823</b> | <b>15539</b>  | <b>10</b>    | <b>32206</b>  |
|         |                      |                  |              |               |              |               |
| seq137  | Cyanobacteria        | Melainabacteria  | 0            | 0             | 0            | 0             |
| seq205  | Cyanobacteria        | Melainabacteria  | 0            | 0             | 0            | 0             |
| seq371  | Cyanobacteria        | Melainabacteria  | 0            | 0             | 0            | 0             |
| seq497  | Cyanobacteria        | Melainabacteria  | 0            | 243           | 0            | 0             |
| seq585  | Cyanobacteria        | Melainabacteria  | 0            | 0             | 0            | 0             |
| seq757  | Cyanobacteria        | Melainabacteria  | 0            | 0             | 0            | 0             |
| seq835  | Cyanobacteria        | Melainabacteria  | 0            | 0             | 0            | 0             |
| seq1218 | Cyanobacteria        | Melainabacteria  | 0            | 0             | 0            | 0             |
| seq1332 | Cyanobacteria        | Melainabacteria  | 0            | 0             | 0            | 0             |
| seq1495 | Cyanobacteria        | Oxyphotobacteria | 0            | 17            | 0            | 0             |
| seq1582 | Cyanobacteria        | Oxyphotobacteria | 0            | 0             | 0            | 0             |
|         | <b>Cyanobacteria</b> | <b>TOTAL</b>     | <b>0</b>     | <b>260</b>    | <b>0</b>     | <b>0</b>      |
|         |                      |                  |              |               |              |               |
| seq1823 | Epsilonbacteraeota   | Campylobacteria  | 0            | 0             | 0            | 0             |
|         |                      |                  |              |               |              |               |
| seq84   | Euryarchaeota        | Methanobacteria  | 1819         | 1583          | 0            | 0             |
| seq348  | Euryarchaeota        | Methanobacteria  | 0            | 0             | 0            | 0             |
| seq1411 | Euryarchaeota        | Thermoplasmata   | 11           | 29            | 0            | 0             |
| seq794  | Euryarchaeota        | Thermoplasmata   | 0            | 0             | 0            | 0             |
|         | <b>Euryarchaeota</b> | <b>TOTAL</b>     | <b>1830</b>  | <b>1612</b>   | <b>0</b>     | <b>0</b>      |
|         |                      |                  |              |               |              |               |
| seq50   | Firmicutes           | Negativicutes    | 0            | 0             | 0            | 0             |
| seq206  | Firmicutes           | Negativicutes    | 0            | 0             | 0            | 0             |
| seq481  | Firmicutes           | Negativicutes    | 0            | 0             | 0            | 0             |

Sequence Count Table

|         | Phylum               | Class            | Subject26WK0 | Subject26WK12 | Subject14WK0 | Subject14WK12 |
|---------|----------------------|------------------|--------------|---------------|--------------|---------------|
| seq945  | Bacteroidetes        | Bacteroidia      | 0            | 0             | 0            | 0             |
| seq1107 | Bacteroidetes        | Bacteroidia      | 0            | 0             | 0            | 0             |
| seq1282 | Bacteroidetes        | Bacteroidia      | 0            | 0             | 0            | 0             |
| seq1440 | Bacteroidetes        | Bacteroidia      | 0            | 0             | 0            | 0             |
| seq1670 | Bacteroidetes        | Bacteroidia      | 0            | 0             | 0            | 0             |
| seq1853 | Bacteroidetes        | Bacteroidia      | 0            | 0             | 0            | 0             |
|         | <b>Bacteroidetes</b> | <b>TOTAL</b>     | <b>28044</b> | <b>42834</b>  | <b>26181</b> | <b>17403</b>  |
|         |                      |                  |              |               |              |               |
| seq137  | Cyanobacteria        | Melainabacteria  | 0            | 0             | 0            | 0             |
| seq205  | Cyanobacteria        | Melainabacteria  | 0            | 0             | 0            | 0             |
| seq371  | Cyanobacteria        | Melainabacteria  | 0            | 0             | 0            | 0             |
| seq497  | Cyanobacteria        | Melainabacteria  | 0            | 0             | 0            | 0             |
| seq585  | Cyanobacteria        | Melainabacteria  | 0            | 0             | 0            | 0             |
| seq757  | Cyanobacteria        | Melainabacteria  | 0            | 0             | 0            | 0             |
| seq835  | Cyanobacteria        | Melainabacteria  | 0            | 0             | 0            | 0             |
| seq1218 | Cyanobacteria        | Melainabacteria  | 0            | 0             | 0            | 0             |
| seq1332 | Cyanobacteria        | Melainabacteria  | 0            | 0             | 0            | 0             |
| seq1495 | Cyanobacteria        | Oxyphotobacteria | 12           | 0             | 0            | 0             |
| seq1582 | Cyanobacteria        | Oxyphotobacteria | 0            | 0             | 0            | 0             |
|         | <b>Cyanobacteria</b> | <b>TOTAL</b>     | <b>12</b>    | <b>0</b>      | <b>0</b>     | <b>0</b>      |
|         |                      |                  |              |               |              |               |
| seq1823 | Epsilonbacteraeota   | Campylobacteria  | 0            | 0             | 0            | 0             |
|         |                      |                  |              |               |              |               |
| seq84   | Euryarchaeota        | Methanobacteria  | 132          | 0             | 0            | 0             |
| seq348  | Euryarchaeota        | Methanobacteria  | 0            | 0             | 0            | 0             |
| seq1411 | Euryarchaeota        | Thermoplasmata   | 0            | 0             | 0            | 0             |
| seq794  | Euryarchaeota        | Thermoplasmata   | 0            | 0             | 0            | 0             |
|         | <b>Euryarchaeota</b> | <b>TOTAL</b>     | <b>132</b>   | <b>0</b>      | <b>0</b>     | <b>0</b>      |
|         |                      |                  |              |               |              |               |
| seq50   | Firmicutes           | Negativicutes    | 0            | 0             | 0            | 0             |
| seq206  | Firmicutes           | Negativicutes    | 0            | 0             | 0            | 0             |
| seq481  | Firmicutes           | Negativicutes    | 0            | 0             | 0            | 0             |

Sequence Count Table

|         | Phylum               | Class            | Subject27WK0 | Subject27WK12 | Subject15WK0 | Subject15WK12 |
|---------|----------------------|------------------|--------------|---------------|--------------|---------------|
| seq945  | Bacteroidetes        | Bacteroidia      | 0            | 0             | 0            | 0             |
| seq1107 | Bacteroidetes        | Bacteroidia      | 0            | 0             | 0            | 0             |
| seq1282 | Bacteroidetes        | Bacteroidia      | 0            | 0             | 0            | 0             |
| seq1440 | Bacteroidetes        | Bacteroidia      | 0            | 0             | 0            | 0             |
| seq1670 | Bacteroidetes        | Bacteroidia      | 0            | 0             | 0            | 0             |
| seq1853 | Bacteroidetes        | Bacteroidia      | 0            | 0             | 0            | 0             |
|         | <b>Bacteroidetes</b> | <b>TOTAL</b>     | <b>26347</b> | <b>29781</b>  | <b>29918</b> | <b>28777</b>  |
|         |                      |                  |              |               |              |               |
| seq137  | Cyanobacteria        | Melainabacteria  | 0            | 0             | 0            | 0             |
| seq205  | Cyanobacteria        | Melainabacteria  | 0            | 0             | 0            | 0             |
| seq371  | Cyanobacteria        | Melainabacteria  | 0            | 0             | 0            | 0             |
| seq497  | Cyanobacteria        | Melainabacteria  | 0            | 0             | 0            | 0             |
| seq585  | Cyanobacteria        | Melainabacteria  | 0            | 0             | 0            | 0             |
| seq757  | Cyanobacteria        | Melainabacteria  | 0            | 0             | 0            | 0             |
| seq835  | Cyanobacteria        | Melainabacteria  | 0            | 0             | 0            | 0             |
| seq1218 | Cyanobacteria        | Melainabacteria  | 0            | 0             | 0            | 0             |
| seq1332 | Cyanobacteria        | Melainabacteria  | 0            | 0             | 0            | 0             |
| seq1495 | Cyanobacteria        | Oxyphotobacteria | 0            | 0             | 0            | 0             |
| seq1582 | Cyanobacteria        | Oxyphotobacteria | 0            | 0             | 0            | 0             |
|         | <b>Cyanobacteria</b> | <b>TOTAL</b>     | <b>0</b>     | <b>0</b>      | <b>0</b>     | <b>0</b>      |
|         |                      |                  |              |               |              |               |
| seq1823 | Epsilonbacteraeota   | Campylobacteria  | 0            | 0             | 0            | 2             |
|         |                      |                  |              |               |              |               |
| seq84   | Euryarchaeota        | Methanobacteria  | 0            | 0             | 0            | 0             |
| seq348  | Euryarchaeota        | Methanobacteria  | 0            | 0             | 0            | 0             |
| seq1411 | Euryarchaeota        | Thermoplasmata   | 0            | 0             | 0            | 0             |
| seq794  | Euryarchaeota        | Thermoplasmata   | 0            | 0             | 0            | 0             |
|         | <b>Euryarchaeota</b> | <b>TOTAL</b>     | <b>0</b>     | <b>0</b>      | <b>0</b>     | <b>0</b>      |
|         |                      |                  |              |               |              |               |
| seq50   | Firmicutes           | Negativicutes    | 0            | 0             | 0            | 0             |
| seq206  | Firmicutes           | Negativicutes    | 0            | 0             | 0            | 0             |
| seq481  | Firmicutes           | Negativicutes    | 0            | 0             | 0            | 0             |

Sequence Count Table

|                | <b>Phylum</b>        | <b>Class</b>     | <b>Δ</b> |  |  |  |
|----------------|----------------------|------------------|----------|--|--|--|
| <b>seq945</b>  | Bacteroidetes        | Bacteroidia      |          |  |  |  |
| <b>seq1107</b> | Bacteroidetes        | Bacteroidia      |          |  |  |  |
| <b>seq1282</b> | Bacteroidetes        | Bacteroidia      |          |  |  |  |
| <b>seq1440</b> | Bacteroidetes        | Bacteroidia      |          |  |  |  |
| <b>seq1670</b> | Bacteroidetes        | Bacteroidia      |          |  |  |  |
| <b>seq1853</b> | Bacteroidetes        | Bacteroidia      |          |  |  |  |
|                | <b>Bacteroidetes</b> | <b>TOTAL</b>     |          |  |  |  |
|                |                      |                  |          |  |  |  |
| <b>seq137</b>  | Cyanobacteria        | Melainabacteria  |          |  |  |  |
| <b>seq205</b>  | Cyanobacteria        | Melainabacteria  |          |  |  |  |
| <b>seq371</b>  | Cyanobacteria        | Melainabacteria  |          |  |  |  |
| <b>seq497</b>  | Cyanobacteria        | Melainabacteria  |          |  |  |  |
| <b>seq585</b>  | Cyanobacteria        | Melainabacteria  |          |  |  |  |
| <b>seq757</b>  | Cyanobacteria        | Melainabacteria  |          |  |  |  |
| <b>seq835</b>  | Cyanobacteria        | Melainabacteria  |          |  |  |  |
| <b>seq1218</b> | Cyanobacteria        | Melainabacteria  |          |  |  |  |
| <b>seq1332</b> | Cyanobacteria        | Melainabacteria  |          |  |  |  |
| <b>seq1495</b> | Cyanobacteria        | Oxyphotobacteria |          |  |  |  |
| <b>seq1582</b> | Cyanobacteria        | Oxyphotobacteria |          |  |  |  |
|                | <b>Cyanobacteria</b> | <b>TOTAL</b>     |          |  |  |  |
|                |                      |                  |          |  |  |  |
| <b>seq1823</b> | Epsilonbacteraeota   | Campylobacteria  |          |  |  |  |
|                |                      |                  |          |  |  |  |
| <b>seq84</b>   | Euryarchaeota        | Methanobacteria  |          |  |  |  |
| <b>seq348</b>  | Euryarchaeota        | Methanobacteria  |          |  |  |  |
| <b>seq1411</b> | Euryarchaeota        | Thermoplasmata   |          |  |  |  |
| <b>seq794</b>  | Euryarchaeota        | Thermoplasmata   |          |  |  |  |
|                | <b>Euryarchaeota</b> | <b>TOTAL</b>     |          |  |  |  |
|                |                      |                  |          |  |  |  |
| <b>seq50</b>   | Firmicutes           | Negativicutes    |          |  |  |  |
| <b>seq206</b>  | Firmicutes           | Negativicutes    |          |  |  |  |
| <b>seq481</b>  | Firmicutes           | Negativicutes    |          |  |  |  |

Sequence Count Table

|                | <b>Phylum</b> | <b>Class</b>  | <b>Order</b>    | <b>Family</b>       |
|----------------|---------------|---------------|-----------------|---------------------|
| <b>seq1176</b> | Firmicutes    | Negativicutes | Selenomonadales | Acidaminococcaceae  |
| <b>seq18</b>   | Firmicutes    | Negativicutes | Selenomonadales | Acidaminococcaceae  |
| <b>seq57</b>   | Firmicutes    | Negativicutes | Selenomonadales | Acidaminococcaceae  |
| <b>seq439</b>  | Firmicutes    | Negativicutes | Selenomonadales | Acidaminococcaceae  |
| <b>seq467</b>  | Firmicutes    | Negativicutes | Selenomonadales | Acidaminococcaceae  |
| <b>seq1224</b> | Firmicutes    | Negativicutes | Selenomonadales | Acidaminococcaceae  |
| <b>seq167</b>  | Firmicutes    | Negativicutes | Selenomonadales | Acidaminococcaceae  |
| <b>seq630</b>  | Firmicutes    | Bacilli       | Lactobacillales | Carnobacteriaceae   |
| <b>seq1099</b> | Firmicutes    | Clostridia    | Clostridiales   | Christensenellaceae |
| <b>seq1750</b> | Firmicutes    | Clostridia    | Clostridiales   | Christensenellaceae |
| <b>seq100</b>  | Firmicutes    | Clostridia    | Clostridiales   | Christensenellaceae |
| <b>seq123</b>  | Firmicutes    | Clostridia    | Clostridiales   | Christensenellaceae |
| <b>seq214</b>  | Firmicutes    | Clostridia    | Clostridiales   | Christensenellaceae |
| <b>seq486</b>  | Firmicutes    | Clostridia    | Clostridiales   | Christensenellaceae |
| <b>seq496</b>  | Firmicutes    | Clostridia    | Clostridiales   | Christensenellaceae |
| <b>seq547</b>  | Firmicutes    | Clostridia    | Clostridiales   | Christensenellaceae |
| <b>seq579</b>  | Firmicutes    | Clostridia    | Clostridiales   | Christensenellaceae |
| <b>seq605</b>  | Firmicutes    | Clostridia    | Clostridiales   | Christensenellaceae |
| <b>seq680</b>  | Firmicutes    | Clostridia    | Clostridiales   | Christensenellaceae |
| <b>seq711</b>  | Firmicutes    | Clostridia    | Clostridiales   | Christensenellaceae |
| <b>seq713</b>  | Firmicutes    | Clostridia    | Clostridiales   | Christensenellaceae |
| <b>seq731</b>  | Firmicutes    | Clostridia    | Clostridiales   | Christensenellaceae |
| <b>seq770</b>  | Firmicutes    | Clostridia    | Clostridiales   | Christensenellaceae |
| <b>seq806</b>  | Firmicutes    | Clostridia    | Clostridiales   | Christensenellaceae |
| <b>seq852</b>  | Firmicutes    | Clostridia    | Clostridiales   | Christensenellaceae |
| <b>seq857</b>  | Firmicutes    | Clostridia    | Clostridiales   | Christensenellaceae |
| <b>seq868</b>  | Firmicutes    | Clostridia    | Clostridiales   | Christensenellaceae |
| <b>seq884</b>  | Firmicutes    | Clostridia    | Clostridiales   | Christensenellaceae |
| <b>seq904</b>  | Firmicutes    | Clostridia    | Clostridiales   | Christensenellaceae |
| <b>seq946</b>  | Firmicutes    | Clostridia    | Clostridiales   | Christensenellaceae |
| <b>seq967</b>  | Firmicutes    | Clostridia    | Clostridiales   | Christensenellaceae |
| <b>seq968</b>  | Firmicutes    | Clostridia    | Clostridiales   | Christensenellaceae |

Sequence Count Table

|                | <b>Phylum</b> | <b>Class</b>  | <b>Genus</b>                  | <b>Species</b> |
|----------------|---------------|---------------|-------------------------------|----------------|
| <b>seq1176</b> | Firmicutes    | Negativicutes | Acidaminococcus               |                |
| <b>seq18</b>   | Firmicutes    | Negativicutes | Phascolarctobacterium         | faecium        |
| <b>seq57</b>   | Firmicutes    | Negativicutes | Phascolarctobacterium         | succinatutens  |
| <b>seq439</b>  | Firmicutes    | Negativicutes | Phascolarctobacterium         |                |
| <b>seq467</b>  | Firmicutes    | Negativicutes | Phascolarctobacterium         |                |
| <b>seq1224</b> | Firmicutes    | Negativicutes | Phascolarctobacterium         |                |
| <b>seq167</b>  | Firmicutes    | Negativicutes | Succiniclasticum              |                |
| <b>seq630</b>  | Firmicutes    | Bacilli       | Granulicatella                |                |
| <b>seq1099</b> | Firmicutes    | Clostridia    | Catabacter                    |                |
| <b>seq1750</b> | Firmicutes    | Clostridia    | Catabacter                    | hongkongensis  |
| <b>seq100</b>  | Firmicutes    | Clostridia    | Christensenellaceae_R-7_group |                |
| <b>seq123</b>  | Firmicutes    | Clostridia    | Christensenellaceae_R-7_group |                |
| <b>seq214</b>  | Firmicutes    | Clostridia    | Christensenellaceae_R-7_group |                |
| <b>seq486</b>  | Firmicutes    | Clostridia    | Christensenellaceae_R-7_group |                |
| <b>seq496</b>  | Firmicutes    | Clostridia    | Christensenellaceae_R-7_group |                |
| <b>seq547</b>  | Firmicutes    | Clostridia    | Christensenellaceae_R-7_group |                |
| <b>seq579</b>  | Firmicutes    | Clostridia    | Christensenellaceae_R-7_group |                |
| <b>seq605</b>  | Firmicutes    | Clostridia    | Christensenellaceae_R-7_group |                |
| <b>seq680</b>  | Firmicutes    | Clostridia    | Christensenellaceae_R-7_group |                |
| <b>seq711</b>  | Firmicutes    | Clostridia    | Christensenellaceae_R-7_group |                |
| <b>seq713</b>  | Firmicutes    | Clostridia    | Christensenellaceae_R-7_group |                |
| <b>seq731</b>  | Firmicutes    | Clostridia    | Christensenellaceae_R-7_group |                |
| <b>seq770</b>  | Firmicutes    | Clostridia    | Christensenellaceae_R-7_group |                |
| <b>seq806</b>  | Firmicutes    | Clostridia    | Christensenellaceae_R-7_group |                |
| <b>seq852</b>  | Firmicutes    | Clostridia    | Christensenellaceae_R-7_group |                |
| <b>seq857</b>  | Firmicutes    | Clostridia    | Christensenellaceae_R-7_group |                |
| <b>seq868</b>  | Firmicutes    | Clostridia    | Christensenellaceae_R-7_group |                |
| <b>seq884</b>  | Firmicutes    | Clostridia    | Christensenellaceae_R-7_group |                |
| <b>seq904</b>  | Firmicutes    | Clostridia    | Christensenellaceae_R-7_group |                |
| <b>seq946</b>  | Firmicutes    | Clostridia    | Christensenellaceae_R-7_group |                |
| <b>seq967</b>  | Firmicutes    | Clostridia    | Christensenellaceae_R-7_group |                |
| <b>seq968</b>  | Firmicutes    | Clostridia    | Christensenellaceae_R-7_group |                |

Sequence Count Table

|                | <b>Phylum</b> | <b>Class</b>  | <b>Subject34WK0</b> | <b>Subject34WK12</b> | <b>Subject16WK0</b> | <b>Subject16WK12</b> |
|----------------|---------------|---------------|---------------------|----------------------|---------------------|----------------------|
| <b>seq1176</b> | Firmicutes    | Negativicutes | 0                   | 0                    | 0                   | 0                    |
| <b>seq18</b>   | Firmicutes    | Negativicutes | 25                  | 0                    | 0                   | 0                    |
| <b>seq57</b>   | Firmicutes    | Negativicutes | 0                   | 1742                 | 4354                | 3103                 |
| <b>seq439</b>  | Firmicutes    | Negativicutes | 0                   | 0                    | 0                   | 0                    |
| <b>seq467</b>  | Firmicutes    | Negativicutes | 0                   | 0                    | 431                 | 481                  |
| <b>seq1224</b> | Firmicutes    | Negativicutes | 0                   | 0                    | 0                   | 0                    |
| <b>seq167</b>  | Firmicutes    | Negativicutes | 2031                | 0                    | 0                   | 0                    |
| <b>seq630</b>  | Firmicutes    | Bacilli       | 0                   | 9                    | 21                  | 5                    |
| <b>seq1099</b> | Firmicutes    | Clostridia    | 0                   | 0                    | 0                   | 0                    |
| <b>seq1750</b> | Firmicutes    | Clostridia    | 0                   | 0                    | 0                   | 0                    |
| <b>seq100</b>  | Firmicutes    | Clostridia    | 0                   | 55                   | 294                 | 303                  |
| <b>seq123</b>  | Firmicutes    | Clostridia    | 0                   | 0                    | 45                  | 72                   |
| <b>seq214</b>  | Firmicutes    | Clostridia    | 0                   | 0                    | 103                 | 145                  |
| <b>seq486</b>  | Firmicutes    | Clostridia    | 0                   | 0                    | 6                   | 57                   |
| <b>seq496</b>  | Firmicutes    | Clostridia    | 0                   | 0                    | 0                   | 0                    |
| <b>seq547</b>  | Firmicutes    | Clostridia    | 0                   | 0                    | 0                   | 0                    |
| <b>seq579</b>  | Firmicutes    | Clostridia    | 0                   | 0                    | 17                  | 14                   |
| <b>seq605</b>  | Firmicutes    | Clostridia    | 0                   | 0                    | 0                   | 0                    |
| <b>seq680</b>  | Firmicutes    | Clostridia    | 0                   | 0                    | 0                   | 0                    |
| <b>seq711</b>  | Firmicutes    | Clostridia    | 0                   | 0                    | 0                   | 0                    |
| <b>seq713</b>  | Firmicutes    | Clostridia    | 0                   | 0                    | 16                  | 22                   |
| <b>seq731</b>  | Firmicutes    | Clostridia    | 0                   | 0                    | 0                   | 0                    |
| <b>seq770</b>  | Firmicutes    | Clostridia    | 0                   | 0                    | 0                   | 0                    |
| <b>seq806</b>  | Firmicutes    | Clostridia    | 0                   | 0                    | 0                   | 0                    |
| <b>seq852</b>  | Firmicutes    | Clostridia    | 0                   | 0                    | 0                   | 0                    |
| <b>seq857</b>  | Firmicutes    | Clostridia    | 0                   | 0                    | 0                   | 0                    |
| <b>seq868</b>  | Firmicutes    | Clostridia    | 0                   | 0                    | 0                   | 0                    |
| <b>seq884</b>  | Firmicutes    | Clostridia    | 0                   | 0                    | 0                   | 0                    |
| <b>seq904</b>  | Firmicutes    | Clostridia    | 0                   | 0                    | 0                   | 0                    |
| <b>seq946</b>  | Firmicutes    | Clostridia    | 0                   | 0                    | 0                   | 0                    |
| <b>seq967</b>  | Firmicutes    | Clostridia    | 24                  | 0                    | 0                   | 0                    |
| <b>seq968</b>  | Firmicutes    | Clostridia    | 0                   | 0                    | 0                   | 0                    |

Sequence Count Table

|                | <b>Phylum</b> | <b>Class</b>  | <b>Subject17WK0</b> | <b>Subject17WK12</b> | <b>Subject1WK0</b> | <b>Subject1WK12</b> |
|----------------|---------------|---------------|---------------------|----------------------|--------------------|---------------------|
| <b>seq1176</b> | Firmicutes    | Negativicutes | 0                   | 0                    | 0                  | 0                   |
| <b>seq18</b>   | Firmicutes    | Negativicutes | 1218                | 7399                 | 3770               | 3573                |
| <b>seq57</b>   | Firmicutes    | Negativicutes | 0                   | 0                    | 0                  | 0                   |
| <b>seq439</b>  | Firmicutes    | Negativicutes | 0                   | 0                    | 0                  | 0                   |
| <b>seq467</b>  | Firmicutes    | Negativicutes | 0                   | 0                    | 0                  | 0                   |
| <b>seq1224</b> | Firmicutes    | Negativicutes | 0                   | 0                    | 0                  | 0                   |
| <b>seq167</b>  | Firmicutes    | Negativicutes | 0                   | 0                    | 0                  | 0                   |
| <b>seq630</b>  | Firmicutes    | Bacilli       | 0                   | 0                    | 0                  | 0                   |
| <b>seq1099</b> | Firmicutes    | Clostridia    | 22                  | 4                    | 0                  | 9                   |
| <b>seq1750</b> | Firmicutes    | Clostridia    | 0                   | 0                    | 0                  | 0                   |
| <b>seq100</b>  | Firmicutes    | Clostridia    | 448                 | 491                  | 487                | 461                 |
| <b>seq123</b>  | Firmicutes    | Clostridia    | 0                   | 0                    | 0                  | 0                   |
| <b>seq214</b>  | Firmicutes    | Clostridia    | 0                   | 0                    | 0                  | 0                   |
| <b>seq486</b>  | Firmicutes    | Clostridia    | 173                 | 110                  | 0                  | 0                   |
| <b>seq496</b>  | Firmicutes    | Clostridia    | 0                   | 0                    | 0                  | 0                   |
| <b>seq547</b>  | Firmicutes    | Clostridia    | 39                  | 74                   | 0                  | 0                   |
| <b>seq579</b>  | Firmicutes    | Clostridia    | 39                  | 29                   | 0                  | 0                   |
| <b>seq605</b>  | Firmicutes    | Clostridia    | 0                   | 0                    | 0                  | 0                   |
| <b>seq680</b>  | Firmicutes    | Clostridia    | 40                  | 40                   | 0                  | 0                   |
| <b>seq711</b>  | Firmicutes    | Clostridia    | 0                   | 0                    | 0                  | 0                   |
| <b>seq713</b>  | Firmicutes    | Clostridia    | 13                  | 33                   | 0                  | 0                   |
| <b>seq731</b>  | Firmicutes    | Clostridia    | 0                   | 0                    | 0                  | 0                   |
| <b>seq770</b>  | Firmicutes    | Clostridia    | 0                   | 0                    | 0                  | 0                   |
| <b>seq806</b>  | Firmicutes    | Clostridia    | 0                   | 11                   | 0                  | 0                   |
| <b>seq852</b>  | Firmicutes    | Clostridia    | 0                   | 0                    | 0                  | 0                   |
| <b>seq857</b>  | Firmicutes    | Clostridia    | 31                  | 35                   | 37                 | 45                  |
| <b>seq868</b>  | Firmicutes    | Clostridia    | 0                   | 0                    | 0                  | 0                   |
| <b>seq884</b>  | Firmicutes    | Clostridia    | 0                   | 0                    | 0                  | 0                   |
| <b>seq904</b>  | Firmicutes    | Clostridia    | 0                   | 0                    | 0                  | 0                   |
| <b>seq946</b>  | Firmicutes    | Clostridia    | 0                   | 0                    | 0                  | 0                   |
| <b>seq967</b>  | Firmicutes    | Clostridia    | 0                   | 0                    | 77                 | 54                  |
| <b>seq968</b>  | Firmicutes    | Clostridia    | 0                   | 17                   | 0                  | 0                   |



Sequence Count Table

|                | <b>Phylum</b> | <b>Class</b>  | <b>Subject2WK0</b> | <b>Subject2WK12</b> | <b>Subject3WK0</b> | <b>Subject3WK12</b> |
|----------------|---------------|---------------|--------------------|---------------------|--------------------|---------------------|
| <b>seq1176</b> | Firmicutes    | Negativicutes | 0                  | 0                   | 0                  | 0                   |
| <b>seq18</b>   | Firmicutes    | Negativicutes | 1370               | 1886                | 0                  | 0                   |
| <b>seq57</b>   | Firmicutes    | Negativicutes | 0                  | 0                   | 0                  | 0                   |
| <b>seq439</b>  | Firmicutes    | Negativicutes | 0                  | 0                   | 0                  | 0                   |
| <b>seq467</b>  | Firmicutes    | Negativicutes | 0                  | 0                   | 0                  | 0                   |
| <b>seq1224</b> | Firmicutes    | Negativicutes | 0                  | 0                   | 42                 | 30                  |
| <b>seq167</b>  | Firmicutes    | Negativicutes | 0                  | 0                   | 0                  | 0                   |
| <b>seq630</b>  | Firmicutes    | Bacilli       | 0                  | 0                   | 30                 | 30                  |
| <b>seq1099</b> | Firmicutes    | Clostridia    | 0                  | 0                   | 0                  | 0                   |
| <b>seq1750</b> | Firmicutes    | Clostridia    | 0                  | 0                   | 0                  | 0                   |
| <b>seq100</b>  | Firmicutes    | Clostridia    | 202                | 186                 | 0                  | 0                   |
| <b>seq123</b>  | Firmicutes    | Clostridia    | 0                  | 0                   | 0                  | 0                   |
| <b>seq214</b>  | Firmicutes    | Clostridia    | 0                  | 0                   | 0                  | 0                   |
| <b>seq486</b>  | Firmicutes    | Clostridia    | 0                  | 0                   | 0                  | 0                   |
| <b>seq496</b>  | Firmicutes    | Clostridia    | 0                  | 0                   | 0                  | 0                   |
| <b>seq547</b>  | Firmicutes    | Clostridia    | 0                  | 0                   | 0                  | 0                   |
| <b>seq579</b>  | Firmicutes    | Clostridia    | 0                  | 0                   | 0                  | 0                   |
| <b>seq605</b>  | Firmicutes    | Clostridia    | 0                  | 0                   | 0                  | 0                   |
| <b>seq680</b>  | Firmicutes    | Clostridia    | 0                  | 0                   | 0                  | 0                   |
| <b>seq711</b>  | Firmicutes    | Clostridia    | 0                  | 0                   | 0                  | 0                   |
| <b>seq713</b>  | Firmicutes    | Clostridia    | 0                  | 0                   | 0                  | 0                   |
| <b>seq731</b>  | Firmicutes    | Clostridia    | 0                  | 0                   | 0                  | 0                   |
| <b>seq770</b>  | Firmicutes    | Clostridia    | 0                  | 0                   | 0                  | 0                   |
| <b>seq806</b>  | Firmicutes    | Clostridia    | 0                  | 0                   | 0                  | 0                   |
| <b>seq852</b>  | Firmicutes    | Clostridia    | 0                  | 0                   | 0                  | 0                   |
| <b>seq857</b>  | Firmicutes    | Clostridia    | 0                  | 0                   | 0                  | 0                   |
| <b>seq868</b>  | Firmicutes    | Clostridia    | 0                  | 0                   | 0                  | 0                   |
| <b>seq884</b>  | Firmicutes    | Clostridia    | 0                  | 0                   | 0                  | 0                   |
| <b>seq904</b>  | Firmicutes    | Clostridia    | 0                  | 0                   | 0                  | 0                   |
| <b>seq946</b>  | Firmicutes    | Clostridia    | 0                  | 0                   | 0                  | 0                   |
| <b>seq967</b>  | Firmicutes    | Clostridia    | 0                  | 0                   | 0                  | 0                   |
| <b>seq968</b>  | Firmicutes    | Clostridia    | 0                  | 0                   | 0                  | 0                   |

Sequence Count Table

|                | <b>Phylum</b> | <b>Class</b>  | <b>Subject4WK0</b> | <b>Subject4WK12</b> | <b>Subject5WK0</b> | <b>Subject5WK12</b> |
|----------------|---------------|---------------|--------------------|---------------------|--------------------|---------------------|
| <b>seq1176</b> | Firmicutes    | Negativicutes | 0                  | 0                   | 0                  | 0                   |
| <b>seq18</b>   | Firmicutes    | Negativicutes | 0                  | 0                   | 1049               | 2740                |
| <b>seq57</b>   | Firmicutes    | Negativicutes | 0                  | 0                   | 0                  | 0                   |
| <b>seq439</b>  | Firmicutes    | Negativicutes | 0                  | 0                   | 0                  | 0                   |
| <b>seq467</b>  | Firmicutes    | Negativicutes | 0                  | 0                   | 0                  | 0                   |
| <b>seq1224</b> | Firmicutes    | Negativicutes | 0                  | 0                   | 0                  | 0                   |
| <b>seq167</b>  | Firmicutes    | Negativicutes | 2828               | 2167                | 0                  | 0                   |
| <b>seq630</b>  | Firmicutes    | Bacilli       | 0                  | 18                  | 10                 | 5                   |
| <b>seq1099</b> | Firmicutes    | Clostridia    | 0                  | 0                   | 0                  | 0                   |
| <b>seq1750</b> | Firmicutes    | Clostridia    | 0                  | 0                   | 0                  | 0                   |
| <b>seq100</b>  | Firmicutes    | Clostridia    | 104                | 376                 | 289                | 523                 |
| <b>seq123</b>  | Firmicutes    | Clostridia    | 0                  | 0                   | 0                  | 0                   |
| <b>seq214</b>  | Firmicutes    | Clostridia    | 0                  | 0                   | 0                  | 0                   |
| <b>seq486</b>  | Firmicutes    | Clostridia    | 0                  | 0                   | 0                  | 0                   |
| <b>seq496</b>  | Firmicutes    | Clostridia    | 0                  | 0                   | 0                  | 0                   |
| <b>seq547</b>  | Firmicutes    | Clostridia    | 0                  | 38                  | 0                  | 0                   |
| <b>seq579</b>  | Firmicutes    | Clostridia    | 0                  | 0                   | 0                  | 0                   |
| <b>seq605</b>  | Firmicutes    | Clostridia    | 67                 | 10                  | 0                  | 0                   |
| <b>seq680</b>  | Firmicutes    | Clostridia    | 59                 | 0                   | 0                  | 0                   |
| <b>seq711</b>  | Firmicutes    | Clostridia    | 0                  | 0                   | 0                  | 0                   |
| <b>seq713</b>  | Firmicutes    | Clostridia    | 0                  | 0                   | 0                  | 0                   |
| <b>seq731</b>  | Firmicutes    | Clostridia    | 0                  | 0                   | 0                  | 0                   |
| <b>seq770</b>  | Firmicutes    | Clostridia    | 0                  | 0                   | 125                | 171                 |
| <b>seq806</b>  | Firmicutes    | Clostridia    | 0                  | 0                   | 0                  | 0                   |
| <b>seq852</b>  | Firmicutes    | Clostridia    | 0                  | 0                   | 0                  | 0                   |
| <b>seq857</b>  | Firmicutes    | Clostridia    | 0                  | 0                   | 0                  | 0                   |
| <b>seq868</b>  | Firmicutes    | Clostridia    | 0                  | 0                   | 0                  | 0                   |
| <b>seq884</b>  | Firmicutes    | Clostridia    | 0                  | 0                   | 0                  | 0                   |
| <b>seq904</b>  | Firmicutes    | Clostridia    | 0                  | 0                   | 0                  | 0                   |
| <b>seq946</b>  | Firmicutes    | Clostridia    | 0                  | 0                   | 0                  | 0                   |
| <b>seq967</b>  | Firmicutes    | Clostridia    | 0                  | 0                   | 0                  | 0                   |
| <b>seq968</b>  | Firmicutes    | Clostridia    | 14                 | 0                   | 0                  | 0                   |

Sequence Count Table

|                | <b>Phylum</b> | <b>Class</b>  | <b>Subject6WK0</b> | <b>Subject6WK12</b> | <b>Subject18WK0</b> | <b>Subject18WK12</b> |
|----------------|---------------|---------------|--------------------|---------------------|---------------------|----------------------|
| <b>seq1176</b> | Firmicutes    | Negativicutes | 0                  | 0                   | 0                   | 0                    |
| <b>seq18</b>   | Firmicutes    | Negativicutes | 36                 | 29                  | 0                   | 0                    |
| <b>seq57</b>   | Firmicutes    | Negativicutes | 2192               | 3155                | 0                   | 0                    |
| <b>seq439</b>  | Firmicutes    | Negativicutes | 423                | 614                 | 0                   | 0                    |
| <b>seq467</b>  | Firmicutes    | Negativicutes | 0                  | 0                   | 0                   | 0                    |
| <b>seq1224</b> | Firmicutes    | Negativicutes | 0                  | 0                   | 0                   | 0                    |
| <b>seq167</b>  | Firmicutes    | Negativicutes | 0                  | 0                   | 0                   | 0                    |
| <b>seq630</b>  | Firmicutes    | Bacilli       | 0                  | 0                   | 0                   | 13                   |
| <b>seq1099</b> | Firmicutes    | Clostridia    | 10                 | 0                   | 13                  | 7                    |
| <b>seq1750</b> | Firmicutes    | Clostridia    | 0                  | 0                   | 0                   | 0                    |
| <b>seq100</b>  | Firmicutes    | Clostridia    | 200                | 266                 | 0                   | 0                    |
| <b>seq123</b>  | Firmicutes    | Clostridia    | 490                | 396                 | 0                   | 0                    |
| <b>seq214</b>  | Firmicutes    | Clostridia    | 350                | 424                 | 421                 | 117                  |
| <b>seq486</b>  | Firmicutes    | Clostridia    | 30                 | 23                  | 0                   | 0                    |
| <b>seq496</b>  | Firmicutes    | Clostridia    | 0                  | 0                   | 0                   | 0                    |
| <b>seq547</b>  | Firmicutes    | Clostridia    | 61                 | 47                  | 0                   | 0                    |
| <b>seq579</b>  | Firmicutes    | Clostridia    | 108                | 53                  | 0                   | 0                    |
| <b>seq605</b>  | Firmicutes    | Clostridia    | 0                  | 0                   | 0                   | 0                    |
| <b>seq680</b>  | Firmicutes    | Clostridia    | 0                  | 0                   | 0                   | 0                    |
| <b>seq711</b>  | Firmicutes    | Clostridia    | 22                 | 13                  | 0                   | 0                    |
| <b>seq713</b>  | Firmicutes    | Clostridia    | 67                 | 27                  | 0                   | 0                    |
| <b>seq731</b>  | Firmicutes    | Clostridia    | 0                  | 0                   | 0                   | 0                    |
| <b>seq770</b>  | Firmicutes    | Clostridia    | 0                  | 0                   | 0                   | 0                    |
| <b>seq806</b>  | Firmicutes    | Clostridia    | 0                  | 0                   | 0                   | 0                    |
| <b>seq852</b>  | Firmicutes    | Clostridia    | 0                  | 0                   | 0                   | 0                    |
| <b>seq857</b>  | Firmicutes    | Clostridia    | 12                 | 0                   | 0                   | 0                    |
| <b>seq868</b>  | Firmicutes    | Clostridia    | 0                  | 15                  | 0                   | 0                    |
| <b>seq884</b>  | Firmicutes    | Clostridia    | 0                  | 0                   | 0                   | 0                    |
| <b>seq904</b>  | Firmicutes    | Clostridia    | 0                  | 0                   | 0                   | 0                    |
| <b>seq946</b>  | Firmicutes    | Clostridia    | 13                 | 27                  | 0                   | 0                    |
| <b>seq967</b>  | Firmicutes    | Clostridia    | 0                  | 0                   | 0                   | 0                    |
| <b>seq968</b>  | Firmicutes    | Clostridia    | 0                  | 0                   | 0                   | 0                    |

Sequence Count Table

|                | <b>Phylum</b> | <b>Class</b>  | <b>Subject19WK0</b> | <b>Subject19WK12</b> | <b>Subject20WK0</b> | <b>Subject20WK12</b> |
|----------------|---------------|---------------|---------------------|----------------------|---------------------|----------------------|
| <b>seq1176</b> | Firmicutes    | Negativicutes | 0                   | 0                    | 0                   | 0                    |
| <b>seq18</b>   | Firmicutes    | Negativicutes | 3830                | 4570                 | 0                   | 0                    |
| <b>seq57</b>   | Firmicutes    | Negativicutes | 0                   | 0                    | 2880                | 3939                 |
| <b>seq439</b>  | Firmicutes    | Negativicutes | 0                   | 0                    | 0                   | 0                    |
| <b>seq467</b>  | Firmicutes    | Negativicutes | 0                   | 0                    | 0                   | 0                    |
| <b>seq1224</b> | Firmicutes    | Negativicutes | 0                   | 0                    | 0                   | 0                    |
| <b>seq167</b>  | Firmicutes    | Negativicutes | 0                   | 0                    | 0                   | 0                    |
| <b>seq630</b>  | Firmicutes    | Bacilli       | 21                  | 0                    | 7                   | 44                   |
| <b>seq1099</b> | Firmicutes    | Clostridia    | 0                   | 0                    | 0                   | 0                    |
| <b>seq1750</b> | Firmicutes    | Clostridia    | 0                   | 0                    | 0                   | 0                    |
| <b>seq100</b>  | Firmicutes    | Clostridia    | 0                   | 0                    | 144                 | 243                  |
| <b>seq123</b>  | Firmicutes    | Clostridia    | 0                   | 0                    | 414                 | 112                  |
| <b>seq214</b>  | Firmicutes    | Clostridia    | 0                   | 0                    | 464                 | 300                  |
| <b>seq486</b>  | Firmicutes    | Clostridia    | 0                   | 0                    | 77                  | 30                   |
| <b>seq496</b>  | Firmicutes    | Clostridia    | 0                   | 0                    | 0                   | 0                    |
| <b>seq547</b>  | Firmicutes    | Clostridia    | 0                   | 0                    | 0                   | 0                    |
| <b>seq579</b>  | Firmicutes    | Clostridia    | 0                   | 0                    | 54                  | 54                   |
| <b>seq605</b>  | Firmicutes    | Clostridia    | 0                   | 0                    | 0                   | 0                    |
| <b>seq680</b>  | Firmicutes    | Clostridia    | 0                   | 0                    | 0                   | 0                    |
| <b>seq711</b>  | Firmicutes    | Clostridia    | 0                   | 0                    | 0                   | 0                    |
| <b>seq713</b>  | Firmicutes    | Clostridia    | 0                   | 0                    | 25                  | 15                   |
| <b>seq731</b>  | Firmicutes    | Clostridia    | 0                   | 0                    | 59                  | 27                   |
| <b>seq770</b>  | Firmicutes    | Clostridia    | 0                   | 0                    | 0                   | 0                    |
| <b>seq806</b>  | Firmicutes    | Clostridia    | 0                   | 0                    | 0                   | 0                    |
| <b>seq852</b>  | Firmicutes    | Clostridia    | 0                   | 0                    | 0                   | 0                    |
| <b>seq857</b>  | Firmicutes    | Clostridia    | 0                   | 0                    | 0                   | 0                    |
| <b>seq868</b>  | Firmicutes    | Clostridia    | 0                   | 0                    | 0                   | 0                    |
| <b>seq884</b>  | Firmicutes    | Clostridia    | 0                   | 0                    | 0                   | 0                    |
| <b>seq904</b>  | Firmicutes    | Clostridia    | 0                   | 0                    | 0                   | 0                    |
| <b>seq946</b>  | Firmicutes    | Clostridia    | 0                   | 0                    | 0                   | 0                    |
| <b>seq967</b>  | Firmicutes    | Clostridia    | 0                   | 0                    | 0                   | 0                    |
| <b>seq968</b>  | Firmicutes    | Clostridia    | 0                   | 0                    | 0                   | 0                    |

Sequence Count Table

|                | <b>Phylum</b> | <b>Class</b>  | <b>Subject7WK0</b> | <b>Subject7WK12</b> | <b>Subject21WK0</b> | <b>Subject21WK12</b> |
|----------------|---------------|---------------|--------------------|---------------------|---------------------|----------------------|
| <b>seq1176</b> | Firmicutes    | Negativicutes | 0                  | 0                   | 0                   | 0                    |
| <b>seq18</b>   | Firmicutes    | Negativicutes | 0                  | 0                   | 0                   | 0                    |
| <b>seq57</b>   | Firmicutes    | Negativicutes | 1020               | 2271                | 0                   | 0                    |
| <b>seq439</b>  | Firmicutes    | Negativicutes | 0                  | 0                   | 0                   | 0                    |
| <b>seq467</b>  | Firmicutes    | Negativicutes | 0                  | 0                   | 0                   | 0                    |
| <b>seq1224</b> | Firmicutes    | Negativicutes | 0                  | 0                   | 0                   | 0                    |
| <b>seq167</b>  | Firmicutes    | Negativicutes | 0                  | 0                   | 0                   | 0                    |
| <b>seq630</b>  | Firmicutes    | Bacilli       | 0                  | 0                   | 0                   | 0                    |
| <b>seq1099</b> | Firmicutes    | Clostridia    | 0                  | 0                   | 0                   | 0                    |
| <b>seq1750</b> | Firmicutes    | Clostridia    | 5                  | 0                   | 0                   | 0                    |
| <b>seq100</b>  | Firmicutes    | Clostridia    | 0                  | 0                   | 0                   | 0                    |
| <b>seq123</b>  | Firmicutes    | Clostridia    | 0                  | 0                   | 0                   | 0                    |
| <b>seq214</b>  | Firmicutes    | Clostridia    | 0                  | 0                   | 0                   | 0                    |
| <b>seq486</b>  | Firmicutes    | Clostridia    | 0                  | 0                   | 0                   | 0                    |
| <b>seq496</b>  | Firmicutes    | Clostridia    | 9                  | 6                   | 0                   | 0                    |
| <b>seq547</b>  | Firmicutes    | Clostridia    | 0                  | 0                   | 0                   | 0                    |
| <b>seq579</b>  | Firmicutes    | Clostridia    | 0                  | 0                   | 0                   | 0                    |
| <b>seq605</b>  | Firmicutes    | Clostridia    | 0                  | 0                   | 0                   | 0                    |
| <b>seq680</b>  | Firmicutes    | Clostridia    | 0                  | 0                   | 0                   | 0                    |
| <b>seq711</b>  | Firmicutes    | Clostridia    | 0                  | 0                   | 0                   | 0                    |
| <b>seq713</b>  | Firmicutes    | Clostridia    | 0                  | 0                   | 0                   | 0                    |
| <b>seq731</b>  | Firmicutes    | Clostridia    | 0                  | 0                   | 0                   | 0                    |
| <b>seq770</b>  | Firmicutes    | Clostridia    | 0                  | 0                   | 0                   | 0                    |
| <b>seq806</b>  | Firmicutes    | Clostridia    | 0                  | 0                   | 0                   | 0                    |
| <b>seq852</b>  | Firmicutes    | Clostridia    | 0                  | 0                   | 0                   | 0                    |
| <b>seq857</b>  | Firmicutes    | Clostridia    | 0                  | 0                   | 0                   | 0                    |
| <b>seq868</b>  | Firmicutes    | Clostridia    | 0                  | 0                   | 0                   | 0                    |
| <b>seq884</b>  | Firmicutes    | Clostridia    | 0                  | 0                   | 0                   | 0                    |
| <b>seq904</b>  | Firmicutes    | Clostridia    | 0                  | 0                   | 0                   | 0                    |
| <b>seq946</b>  | Firmicutes    | Clostridia    | 0                  | 0                   | 0                   | 0                    |
| <b>seq967</b>  | Firmicutes    | Clostridia    | 0                  | 0                   | 0                   | 0                    |
| <b>seq968</b>  | Firmicutes    | Clostridia    | 0                  | 0                   | 0                   | 0                    |

Sequence Count Table

|                | <b>Phylum</b> | <b>Class</b>  | <b>Subject8WK0</b> | <b>Subject8WK12</b> | <b>Subject9WK0</b> | <b>Subject9WK12</b> |
|----------------|---------------|---------------|--------------------|---------------------|--------------------|---------------------|
| <b>seq1176</b> | Firmicutes    | Negativicutes | 0                  | 0                   | 0                  | 0                   |
| <b>seq18</b>   | Firmicutes    | Negativicutes | 1936               | 3410                | 655                | 2349                |
| <b>seq57</b>   | Firmicutes    | Negativicutes | 0                  | 0                   | 0                  | 8                   |
| <b>seq439</b>  | Firmicutes    | Negativicutes | 0                  | 0                   | 0                  | 0                   |
| <b>seq467</b>  | Firmicutes    | Negativicutes | 0                  | 0                   | 0                  | 0                   |
| <b>seq1224</b> | Firmicutes    | Negativicutes | 0                  | 0                   | 0                  | 0                   |
| <b>seq167</b>  | Firmicutes    | Negativicutes | 0                  | 0                   | 0                  | 0                   |
| <b>seq630</b>  | Firmicutes    | Bacilli       | 0                  | 0                   | 7                  | 28                  |
| <b>seq1099</b> | Firmicutes    | Clostridia    | 19                 | 16                  | 5                  | 0                   |
| <b>seq1750</b> | Firmicutes    | Clostridia    | 0                  | 0                   | 0                  | 0                   |
| <b>seq100</b>  | Firmicutes    | Clostridia    | 456                | 681                 | 0                  | 0                   |
| <b>seq123</b>  | Firmicutes    | Clostridia    | 0                  | 0                   | 0                  | 0                   |
| <b>seq214</b>  | Firmicutes    | Clostridia    | 0                  | 0                   | 0                  | 0                   |
| <b>seq486</b>  | Firmicutes    | Clostridia    | 0                  | 0                   | 0                  | 0                   |
| <b>seq496</b>  | Firmicutes    | Clostridia    | 0                  | 0                   | 0                  | 0                   |
| <b>seq547</b>  | Firmicutes    | Clostridia    | 0                  | 0                   | 0                  | 0                   |
| <b>seq579</b>  | Firmicutes    | Clostridia    | 10                 | 17                  | 0                  | 0                   |
| <b>seq605</b>  | Firmicutes    | Clostridia    | 0                  | 0                   | 0                  | 0                   |
| <b>seq680</b>  | Firmicutes    | Clostridia    | 0                  | 0                   | 0                  | 0                   |
| <b>seq711</b>  | Firmicutes    | Clostridia    | 0                  | 0                   | 0                  | 0                   |
| <b>seq713</b>  | Firmicutes    | Clostridia    | 27                 | 5                   | 0                  | 0                   |
| <b>seq731</b>  | Firmicutes    | Clostridia    | 0                  | 0                   | 0                  | 0                   |
| <b>seq770</b>  | Firmicutes    | Clostridia    | 0                  | 0                   | 0                  | 0                   |
| <b>seq806</b>  | Firmicutes    | Clostridia    | 0                  | 0                   | 0                  | 0                   |
| <b>seq852</b>  | Firmicutes    | Clostridia    | 0                  | 0                   | 0                  | 0                   |
| <b>seq857</b>  | Firmicutes    | Clostridia    | 0                  | 0                   | 0                  | 0                   |
| <b>seq868</b>  | Firmicutes    | Clostridia    | 0                  | 0                   | 0                  | 0                   |
| <b>seq884</b>  | Firmicutes    | Clostridia    | 0                  | 0                   | 0                  | 0                   |
| <b>seq904</b>  | Firmicutes    | Clostridia    | 0                  | 0                   | 0                  | 0                   |
| <b>seq946</b>  | Firmicutes    | Clostridia    | 0                  | 0                   | 0                  | 0                   |
| <b>seq967</b>  | Firmicutes    | Clostridia    | 0                  | 0                   | 0                  | 0                   |
| <b>seq968</b>  | Firmicutes    | Clostridia    | 0                  | 0                   | 0                  | 0                   |

Sequence Count Table

|                | <b>Phylum</b> | <b>Class</b>  | <b>Subject10WK0</b> | <b>Subject10WK12</b> | <b>Subject22WK0</b> | <b>Subject22WK12</b> |
|----------------|---------------|---------------|---------------------|----------------------|---------------------|----------------------|
| <b>seq1176</b> | Firmicutes    | Negativicutes | 0                   | 0                    | 0                   | 0                    |
| <b>seq18</b>   | Firmicutes    | Negativicutes | 0                   | 0                    | 2028                | 1722                 |
| <b>seq57</b>   | Firmicutes    | Negativicutes | 0                   | 0                    | 0                   | 0                    |
| <b>seq439</b>  | Firmicutes    | Negativicutes | 0                   | 0                    | 0                   | 0                    |
| <b>seq467</b>  | Firmicutes    | Negativicutes | 0                   | 0                    | 0                   | 0                    |
| <b>seq1224</b> | Firmicutes    | Negativicutes | 0                   | 0                    | 0                   | 0                    |
| <b>seq167</b>  | Firmicutes    | Negativicutes | 0                   | 0                    | 0                   | 0                    |
| <b>seq630</b>  | Firmicutes    | Bacilli       | 53                  | 0                    | 0                   | 0                    |
| <b>seq1099</b> | Firmicutes    | Clostridia    | 0                   | 0                    | 0                   | 0                    |
| <b>seq1750</b> | Firmicutes    | Clostridia    | 0                   | 0                    | 0                   | 0                    |
| <b>seq100</b>  | Firmicutes    | Clostridia    | 0                   | 0                    | 121                 | 94                   |
| <b>seq123</b>  | Firmicutes    | Clostridia    | 0                   | 0                    | 1893                | 2445                 |
| <b>seq214</b>  | Firmicutes    | Clostridia    | 0                   | 0                    | 626                 | 442                  |
| <b>seq486</b>  | Firmicutes    | Clostridia    | 0                   | 0                    | 0                   | 0                    |
| <b>seq496</b>  | Firmicutes    | Clostridia    | 0                   | 0                    | 149                 | 272                  |
| <b>seq547</b>  | Firmicutes    | Clostridia    | 0                   | 0                    | 67                  | 65                   |
| <b>seq579</b>  | Firmicutes    | Clostridia    | 0                   | 0                    | 0                   | 0                    |
| <b>seq605</b>  | Firmicutes    | Clostridia    | 0                   | 0                    | 0                   | 0                    |
| <b>seq680</b>  | Firmicutes    | Clostridia    | 0                   | 0                    | 0                   | 0                    |
| <b>seq711</b>  | Firmicutes    | Clostridia    | 0                   | 0                    | 29                  | 82                   |
| <b>seq713</b>  | Firmicutes    | Clostridia    | 0                   | 0                    | 0                   | 0                    |
| <b>seq731</b>  | Firmicutes    | Clostridia    | 0                   | 0                    | 123                 | 109                  |
| <b>seq770</b>  | Firmicutes    | Clostridia    | 0                   | 0                    | 0                   | 0                    |
| <b>seq806</b>  | Firmicutes    | Clostridia    | 0                   | 0                    | 90                  | 121                  |
| <b>seq852</b>  | Firmicutes    | Clostridia    | 0                   | 0                    | 58                  | 165                  |
| <b>seq857</b>  | Firmicutes    | Clostridia    | 0                   | 0                    | 0                   | 0                    |
| <b>seq868</b>  | Firmicutes    | Clostridia    | 0                   | 0                    | 0                   | 21                   |
| <b>seq884</b>  | Firmicutes    | Clostridia    | 0                   | 0                    | 73                  | 129                  |
| <b>seq904</b>  | Firmicutes    | Clostridia    | 0                   | 0                    | 0                   | 0                    |
| <b>seq946</b>  | Firmicutes    | Clostridia    | 0                   | 0                    | 0                   | 0                    |
| <b>seq967</b>  | Firmicutes    | Clostridia    | 0                   | 0                    | 0                   | 0                    |
| <b>seq968</b>  | Firmicutes    | Clostridia    | 0                   | 0                    | 0                   | 41                   |

Sequence Count Table

|                | <b>Phylum</b> | <b>Class</b>  | <b>Subject23WK0</b> | <b>Subject23WK12</b> | <b>Subject24WK0</b> | <b>Subject24WK12</b> |
|----------------|---------------|---------------|---------------------|----------------------|---------------------|----------------------|
| <b>seq1176</b> | Firmicutes    | Negativicutes | 0                   | 0                    | 87                  | 0                    |
| <b>seq18</b>   | Firmicutes    | Negativicutes | 1990                | 2020                 | 1800                | 2287                 |
| <b>seq57</b>   | Firmicutes    | Negativicutes | 0                   | 0                    | 0                   | 0                    |
| <b>seq439</b>  | Firmicutes    | Negativicutes | 0                   | 0                    | 0                   | 0                    |
| <b>seq467</b>  | Firmicutes    | Negativicutes | 0                   | 0                    | 0                   | 0                    |
| <b>seq1224</b> | Firmicutes    | Negativicutes | 0                   | 0                    | 0                   | 0                    |
| <b>seq167</b>  | Firmicutes    | Negativicutes | 0                   | 0                    | 0                   | 0                    |
| <b>seq630</b>  | Firmicutes    | Bacilli       | 12                  | 6                    | 0                   | 0                    |
| <b>seq1099</b> | Firmicutes    | Clostridia    | 0                   | 0                    | 0                   | 0                    |
| <b>seq1750</b> | Firmicutes    | Clostridia    | 0                   | 0                    | 0                   | 0                    |
| <b>seq100</b>  | Firmicutes    | Clostridia    | 202                 | 258                  | 386                 | 638                  |
| <b>seq123</b>  | Firmicutes    | Clostridia    | 0                   | 0                    | 792                 | 0                    |
| <b>seq214</b>  | Firmicutes    | Clostridia    | 378                 | 468                  | 275                 | 0                    |
| <b>seq486</b>  | Firmicutes    | Clostridia    | 10                  | 56                   | 60                  | 0                    |
| <b>seq496</b>  | Firmicutes    | Clostridia    | 0                   | 0                    | 0                   | 0                    |
| <b>seq547</b>  | Firmicutes    | Clostridia    | 0                   | 0                    | 0                   | 0                    |
| <b>seq579</b>  | Firmicutes    | Clostridia    | 0                   | 0                    | 0                   | 0                    |
| <b>seq605</b>  | Firmicutes    | Clostridia    | 0                   | 14                   | 0                   | 0                    |
| <b>seq680</b>  | Firmicutes    | Clostridia    | 0                   | 20                   | 0                   | 0                    |
| <b>seq711</b>  | Firmicutes    | Clostridia    | 0                   | 0                    | 0                   | 0                    |
| <b>seq713</b>  | Firmicutes    | Clostridia    | 0                   | 0                    | 28                  | 0                    |
| <b>seq731</b>  | Firmicutes    | Clostridia    | 0                   | 0                    | 0                   | 0                    |
| <b>seq770</b>  | Firmicutes    | Clostridia    | 0                   | 0                    | 0                   | 0                    |
| <b>seq806</b>  | Firmicutes    | Clostridia    | 0                   | 0                    | 0                   | 0                    |
| <b>seq852</b>  | Firmicutes    | Clostridia    | 0                   | 0                    | 0                   | 0                    |
| <b>seq857</b>  | Firmicutes    | Clostridia    | 0                   | 0                    | 0                   | 0                    |
| <b>seq868</b>  | Firmicutes    | Clostridia    | 0                   | 0                    | 0                   | 0                    |
| <b>seq884</b>  | Firmicutes    | Clostridia    | 0                   | 0                    | 0                   | 0                    |
| <b>seq904</b>  | Firmicutes    | Clostridia    | 10                  | 101                  | 0                   | 0                    |
| <b>seq946</b>  | Firmicutes    | Clostridia    | 0                   | 39                   | 0                   | 0                    |
| <b>seq967</b>  | Firmicutes    | Clostridia    | 0                   | 0                    | 0                   | 0                    |
| <b>seq968</b>  | Firmicutes    | Clostridia    | 0                   | 0                    | 0                   | 0                    |



Sequence Count Table

|                | <b>Phylum</b> | <b>Class</b>  | <b>Subject11WK0</b> | <b>Subject11WK12</b> | <b>Subject12WK0</b> | <b>Subject12WK12</b> |
|----------------|---------------|---------------|---------------------|----------------------|---------------------|----------------------|
| <b>seq1176</b> | Firmicutes    | Negativicutes | 0                   | 0                    | 0                   | 0                    |
| <b>seq18</b>   | Firmicutes    | Negativicutes | 0                   | 0                    | 0                   | 0                    |
| <b>seq57</b>   | Firmicutes    | Negativicutes | 0                   | 0                    | 0                   | 0                    |
| <b>seq439</b>  | Firmicutes    | Negativicutes | 0                   | 0                    | 0                   | 0                    |
| <b>seq467</b>  | Firmicutes    | Negativicutes | 0                   | 0                    | 0                   | 0                    |
| <b>seq1224</b> | Firmicutes    | Negativicutes | 0                   | 0                    | 0                   | 0                    |
| <b>seq167</b>  | Firmicutes    | Negativicutes | 0                   | 0                    | 0                   | 0                    |
| <b>seq630</b>  | Firmicutes    | Bacilli       | 20                  | 16                   | 0                   | 0                    |
| <b>seq1099</b> | Firmicutes    | Clostridia    | 0                   | 0                    | 0                   | 0                    |
| <b>seq1750</b> | Firmicutes    | Clostridia    | 5                   | 0                    | 0                   | 0                    |
| <b>seq100</b>  | Firmicutes    | Clostridia    | 61                  | 35                   | 186                 | 291                  |
| <b>seq123</b>  | Firmicutes    | Clostridia    | 0                   | 0                    | 24                  | 14                   |
| <b>seq214</b>  | Firmicutes    | Clostridia    | 0                   | 0                    | 0                   | 0                    |
| <b>seq486</b>  | Firmicutes    | Clostridia    | 0                   | 0                    | 0                   | 0                    |
| <b>seq496</b>  | Firmicutes    | Clostridia    | 0                   | 0                    | 0                   | 0                    |
| <b>seq547</b>  | Firmicutes    | Clostridia    | 0                   | 0                    | 0                   | 0                    |
| <b>seq579</b>  | Firmicutes    | Clostridia    | 0                   | 0                    | 14                  | 0                    |
| <b>seq605</b>  | Firmicutes    | Clostridia    | 0                   | 0                    | 0                   | 0                    |
| <b>seq680</b>  | Firmicutes    | Clostridia    | 0                   | 0                    | 0                   | 0                    |
| <b>seq711</b>  | Firmicutes    | Clostridia    | 0                   | 0                    | 0                   | 0                    |
| <b>seq713</b>  | Firmicutes    | Clostridia    | 0                   | 0                    | 10                  | 0                    |
| <b>seq731</b>  | Firmicutes    | Clostridia    | 0                   | 0                    | 0                   | 0                    |
| <b>seq770</b>  | Firmicutes    | Clostridia    | 0                   | 0                    | 0                   | 0                    |
| <b>seq806</b>  | Firmicutes    | Clostridia    | 0                   | 0                    | 0                   | 0                    |
| <b>seq852</b>  | Firmicutes    | Clostridia    | 0                   | 0                    | 0                   | 0                    |
| <b>seq857</b>  | Firmicutes    | Clostridia    | 0                   | 0                    | 0                   | 0                    |
| <b>seq868</b>  | Firmicutes    | Clostridia    | 0                   | 0                    | 0                   | 0                    |
| <b>seq884</b>  | Firmicutes    | Clostridia    | 0                   | 0                    | 0                   | 0                    |
| <b>seq904</b>  | Firmicutes    | Clostridia    | 0                   | 0                    | 0                   | 0                    |
| <b>seq946</b>  | Firmicutes    | Clostridia    | 0                   | 0                    | 0                   | 0                    |
| <b>seq967</b>  | Firmicutes    | Clostridia    | 0                   | 0                    | 0                   | 0                    |
| <b>seq968</b>  | Firmicutes    | Clostridia    | 0                   | 0                    | 0                   | 0                    |

Sequence Count Table

|                | <b>Phylum</b> | <b>Class</b>  | <b>Subject25WK0</b> | <b>Subject25WK12</b> | <b>Subject38WK0</b> | <b>Subject38WK12</b> |
|----------------|---------------|---------------|---------------------|----------------------|---------------------|----------------------|
| <b>seq1176</b> | Firmicutes    | Negativicutes | 0                   | 0                    | 0                   | 0                    |
| <b>seq18</b>   | Firmicutes    | Negativicutes | 0                   | 0                    | 0                   | 0                    |
| <b>seq57</b>   | Firmicutes    | Negativicutes | 0                   | 0                    | 0                   | 0                    |
| <b>seq439</b>  | Firmicutes    | Negativicutes | 0                   | 0                    | 0                   | 0                    |
| <b>seq467</b>  | Firmicutes    | Negativicutes | 0                   | 0                    | 0                   | 0                    |
| <b>seq1224</b> | Firmicutes    | Negativicutes | 0                   | 0                    | 0                   | 0                    |
| <b>seq167</b>  | Firmicutes    | Negativicutes | 61                  | 47                   | 0                   | 0                    |
| <b>seq630</b>  | Firmicutes    | Bacilli       | 0                   | 0                    | 0                   | 0                    |
| <b>seq1099</b> | Firmicutes    | Clostridia    | 0                   | 0                    | 0                   | 0                    |
| <b>seq1750</b> | Firmicutes    | Clostridia    | 0                   | 0                    | 0                   | 0                    |
| <b>seq100</b>  | Firmicutes    | Clostridia    | 199                 | 397                  | 0                   | 0                    |
| <b>seq123</b>  | Firmicutes    | Clostridia    | 0                   | 0                    | 0                   | 0                    |
| <b>seq214</b>  | Firmicutes    | Clostridia    | 0                   | 0                    | 0                   | 0                    |
| <b>seq486</b>  | Firmicutes    | Clostridia    | 90                  | 32                   | 0                   | 0                    |
| <b>seq496</b>  | Firmicutes    | Clostridia    | 74                  | 0                    | 0                   | 0                    |
| <b>seq547</b>  | Firmicutes    | Clostridia    | 127                 | 0                    | 0                   | 0                    |
| <b>seq579</b>  | Firmicutes    | Clostridia    | 44                  | 21                   | 0                   | 0                    |
| <b>seq605</b>  | Firmicutes    | Clostridia    | 158                 | 0                    | 0                   | 0                    |
| <b>seq680</b>  | Firmicutes    | Clostridia    | 162                 | 38                   | 0                   | 0                    |
| <b>seq711</b>  | Firmicutes    | Clostridia    | 67                  | 0                    | 0                   | 0                    |
| <b>seq713</b>  | Firmicutes    | Clostridia    | 0                   | 0                    | 0                   | 0                    |
| <b>seq731</b>  | Firmicutes    | Clostridia    | 20                  | 0                    | 0                   | 0                    |
| <b>seq770</b>  | Firmicutes    | Clostridia    | 0                   | 0                    | 0                   | 0                    |
| <b>seq806</b>  | Firmicutes    | Clostridia    | 0                   | 0                    | 0                   | 0                    |
| <b>seq852</b>  | Firmicutes    | Clostridia    | 0                   | 0                    | 0                   | 0                    |
| <b>seq857</b>  | Firmicutes    | Clostridia    | 0                   | 0                    | 0                   | 0                    |
| <b>seq868</b>  | Firmicutes    | Clostridia    | 99                  | 24                   | 0                   | 0                    |
| <b>seq884</b>  | Firmicutes    | Clostridia    | 0                   | 0                    | 0                   | 0                    |
| <b>seq904</b>  | Firmicutes    | Clostridia    | 0                   | 0                    | 0                   | 0                    |
| <b>seq946</b>  | Firmicutes    | Clostridia    | 36                  | 42                   | 0                   | 0                    |
| <b>seq967</b>  | Firmicutes    | Clostridia    | 0                   | 0                    | 0                   | 0                    |
| <b>seq968</b>  | Firmicutes    | Clostridia    | 17                  | 0                    | 0                   | 0                    |

Sequence Count Table

|                | <b>Phylum</b> | <b>Class</b>  | <b>Subject31WK0</b> | <b>Subject31WK12</b> | <b>Subject32WK0</b> | <b>Subject32WK12</b> |
|----------------|---------------|---------------|---------------------|----------------------|---------------------|----------------------|
| <b>seq1176</b> | Firmicutes    | Negativicutes | 0                   | 0                    | 0                   | 0                    |
| <b>seq18</b>   | Firmicutes    | Negativicutes | 0                   | 0                    | 0                   | 0                    |
| <b>seq57</b>   | Firmicutes    | Negativicutes | 0                   | 0                    | 0                   | 0                    |
| <b>seq439</b>  | Firmicutes    | Negativicutes | 0                   | 0                    | 0                   | 0                    |
| <b>seq467</b>  | Firmicutes    | Negativicutes | 0                   | 0                    | 0                   | 0                    |
| <b>seq1224</b> | Firmicutes    | Negativicutes | 0                   | 0                    | 0                   | 0                    |
| <b>seq167</b>  | Firmicutes    | Negativicutes | 0                   | 0                    | 0                   | 0                    |
| <b>seq630</b>  | Firmicutes    | Bacilli       | 0                   | 0                    | 11                  | 0                    |
| <b>seq1099</b> | Firmicutes    | Clostridia    | 0                   | 0                    | 0                   | 0                    |
| <b>seq1750</b> | Firmicutes    | Clostridia    | 0                   | 0                    | 0                   | 0                    |
| <b>seq100</b>  | Firmicutes    | Clostridia    | 0                   | 0                    | 0                   | 0                    |
| <b>seq123</b>  | Firmicutes    | Clostridia    | 0                   | 0                    | 0                   | 0                    |
| <b>seq214</b>  | Firmicutes    | Clostridia    | 0                   | 0                    | 0                   | 0                    |
| <b>seq486</b>  | Firmicutes    | Clostridia    | 0                   | 0                    | 0                   | 0                    |
| <b>seq496</b>  | Firmicutes    | Clostridia    | 0                   | 0                    | 0                   | 0                    |
| <b>seq547</b>  | Firmicutes    | Clostridia    | 0                   | 0                    | 0                   | 0                    |
| <b>seq579</b>  | Firmicutes    | Clostridia    | 0                   | 0                    | 0                   | 0                    |
| <b>seq605</b>  | Firmicutes    | Clostridia    | 0                   | 0                    | 0                   | 0                    |
| <b>seq680</b>  | Firmicutes    | Clostridia    | 0                   | 0                    | 0                   | 0                    |
| <b>seq711</b>  | Firmicutes    | Clostridia    | 0                   | 0                    | 0                   | 0                    |
| <b>seq713</b>  | Firmicutes    | Clostridia    | 0                   | 0                    | 0                   | 0                    |
| <b>seq731</b>  | Firmicutes    | Clostridia    | 0                   | 0                    | 0                   | 0                    |
| <b>seq770</b>  | Firmicutes    | Clostridia    | 0                   | 0                    | 0                   | 0                    |
| <b>seq806</b>  | Firmicutes    | Clostridia    | 0                   | 0                    | 0                   | 0                    |
| <b>seq852</b>  | Firmicutes    | Clostridia    | 0                   | 0                    | 0                   | 0                    |
| <b>seq857</b>  | Firmicutes    | Clostridia    | 0                   | 0                    | 0                   | 0                    |
| <b>seq868</b>  | Firmicutes    | Clostridia    | 0                   | 0                    | 0                   | 0                    |
| <b>seq884</b>  | Firmicutes    | Clostridia    | 0                   | 0                    | 0                   | 0                    |
| <b>seq904</b>  | Firmicutes    | Clostridia    | 0                   | 0                    | 0                   | 0                    |
| <b>seq946</b>  | Firmicutes    | Clostridia    | 0                   | 0                    | 0                   | 0                    |
| <b>seq967</b>  | Firmicutes    | Clostridia    | 0                   | 0                    | 0                   | 0                    |
| <b>seq968</b>  | Firmicutes    | Clostridia    | 0                   | 0                    | 0                   | 0                    |

Sequence Count Table

|                | <b>Phylum</b> | <b>Class</b>  | <b>Subject13WK0</b> | <b>Subject13WK12</b> | <b>Subject39WK0</b> | <b>Subject39WK12</b> |
|----------------|---------------|---------------|---------------------|----------------------|---------------------|----------------------|
| <b>seq1176</b> | Firmicutes    | Negativicutes | 0                   | 0                    | 0                   | 0                    |
| <b>seq18</b>   | Firmicutes    | Negativicutes | 1574                | 1057                 | 0                   | 0                    |
| <b>seq57</b>   | Firmicutes    | Negativicutes | 0                   | 0                    | 0                   | 3010                 |
| <b>seq439</b>  | Firmicutes    | Negativicutes | 0                   | 0                    | 0                   | 0                    |
| <b>seq467</b>  | Firmicutes    | Negativicutes | 0                   | 0                    | 0                   | 0                    |
| <b>seq1224</b> | Firmicutes    | Negativicutes | 0                   | 0                    | 0                   | 0                    |
| <b>seq167</b>  | Firmicutes    | Negativicutes | 0                   | 0                    | 0                   | 0                    |
| <b>seq630</b>  | Firmicutes    | Bacilli       | 0                   | 0                    | 0                   | 5                    |
| <b>seq1099</b> | Firmicutes    | Clostridia    | 0                   | 0                    | 0                   | 0                    |
| <b>seq1750</b> | Firmicutes    | Clostridia    | 0                   | 0                    | 0                   | 0                    |
| <b>seq100</b>  | Firmicutes    | Clostridia    | 282                 | 90                   | 0                   | 94                   |
| <b>seq123</b>  | Firmicutes    | Clostridia    | 0                   | 0                    | 0                   | 0                    |
| <b>seq214</b>  | Firmicutes    | Clostridia    | 0                   | 0                    | 0                   | 0                    |
| <b>seq486</b>  | Firmicutes    | Clostridia    | 0                   | 0                    | 0                   | 0                    |
| <b>seq496</b>  | Firmicutes    | Clostridia    | 129                 | 102                  | 0                   | 0                    |
| <b>seq547</b>  | Firmicutes    | Clostridia    | 104                 | 0                    | 0                   | 0                    |
| <b>seq579</b>  | Firmicutes    | Clostridia    | 0                   | 0                    | 0                   | 0                    |
| <b>seq605</b>  | Firmicutes    | Clostridia    | 106                 | 169                  | 0                   | 0                    |
| <b>seq680</b>  | Firmicutes    | Clostridia    | 47                  | 0                    | 0                   | 0                    |
| <b>seq711</b>  | Firmicutes    | Clostridia    | 72                  | 79                   | 0                   | 0                    |
| <b>seq713</b>  | Firmicutes    | Clostridia    | 0                   | 0                    | 0                   | 0                    |
| <b>seq731</b>  | Firmicutes    | Clostridia    | 0                   | 0                    | 0                   | 0                    |
| <b>seq770</b>  | Firmicutes    | Clostridia    | 0                   | 0                    | 0                   | 0                    |
| <b>seq806</b>  | Firmicutes    | Clostridia    | 0                   | 0                    | 0                   | 0                    |
| <b>seq852</b>  | Firmicutes    | Clostridia    | 0                   | 0                    | 0                   | 0                    |
| <b>seq857</b>  | Firmicutes    | Clostridia    | 19                  | 30                   | 0                   | 0                    |
| <b>seq868</b>  | Firmicutes    | Clostridia    | 38                  | 19                   | 0                   | 0                    |
| <b>seq884</b>  | Firmicutes    | Clostridia    | 4                   | 0                    | 0                   | 0                    |
| <b>seq904</b>  | Firmicutes    | Clostridia    | 0                   | 0                    | 0                   | 0                    |
| <b>seq946</b>  | Firmicutes    | Clostridia    | 0                   | 0                    | 0                   | 0                    |
| <b>seq967</b>  | Firmicutes    | Clostridia    | 0                   | 0                    | 0                   | 0                    |
| <b>seq968</b>  | Firmicutes    | Clostridia    | 26                  | 40                   | 0                   | 0                    |

Sequence Count Table

|                | <b>Phylum</b> | <b>Class</b>  | <b>Subject26WK0</b> | <b>Subject26WK12</b> | <b>Subject14WK0</b> | <b>Subject14WK12</b> |
|----------------|---------------|---------------|---------------------|----------------------|---------------------|----------------------|
| <b>seq1176</b> | Firmicutes    | Negativicutes | 0                   | 0                    | 0                   | 0                    |
| <b>seq18</b>   | Firmicutes    | Negativicutes | 6471                | 2947                 | 1863                | 1640                 |
| <b>seq57</b>   | Firmicutes    | Negativicutes | 0                   | 0                    | 0                   | 0                    |
| <b>seq439</b>  | Firmicutes    | Negativicutes | 0                   | 0                    | 0                   | 0                    |
| <b>seq467</b>  | Firmicutes    | Negativicutes | 0                   | 0                    | 0                   | 0                    |
| <b>seq1224</b> | Firmicutes    | Negativicutes | 0                   | 0                    | 0                   | 0                    |
| <b>seq167</b>  | Firmicutes    | Negativicutes | 0                   | 0                    | 0                   | 0                    |
| <b>seq630</b>  | Firmicutes    | Bacilli       | 28                  | 0                    | 0                   | 6                    |
| <b>seq1099</b> | Firmicutes    | Clostridia    | 0                   | 0                    | 0                   | 0                    |
| <b>seq1750</b> | Firmicutes    | Clostridia    | 0                   | 0                    | 0                   | 0                    |
| <b>seq100</b>  | Firmicutes    | Clostridia    | 2127                | 659                  | 571                 | 431                  |
| <b>seq123</b>  | Firmicutes    | Clostridia    | 0                   | 0                    | 1594                | 2814                 |
| <b>seq214</b>  | Firmicutes    | Clostridia    | 0                   | 0                    | 0                   | 0                    |
| <b>seq486</b>  | Firmicutes    | Clostridia    | 0                   | 0                    | 18                  | 40                   |
| <b>seq496</b>  | Firmicutes    | Clostridia    | 0                   | 0                    | 30                  | 26                   |
| <b>seq547</b>  | Firmicutes    | Clostridia    | 0                   | 0                    | 0                   | 20                   |
| <b>seq579</b>  | Firmicutes    | Clostridia    | 0                   | 0                    | 44                  | 65                   |
| <b>seq605</b>  | Firmicutes    | Clostridia    | 0                   | 0                    | 0                   | 0                    |
| <b>seq680</b>  | Firmicutes    | Clostridia    | 0                   | 0                    | 0                   | 0                    |
| <b>seq711</b>  | Firmicutes    | Clostridia    | 0                   | 0                    | 0                   | 0                    |
| <b>seq713</b>  | Firmicutes    | Clostridia    | 0                   | 0                    | 0                   | 49                   |
| <b>seq731</b>  | Firmicutes    | Clostridia    | 0                   | 0                    | 0                   | 0                    |
| <b>seq770</b>  | Firmicutes    | Clostridia    | 0                   | 0                    | 0                   | 0                    |
| <b>seq806</b>  | Firmicutes    | Clostridia    | 0                   | 0                    | 13                  | 31                   |
| <b>seq852</b>  | Firmicutes    | Clostridia    | 0                   | 0                    | 0                   | 0                    |
| <b>seq857</b>  | Firmicutes    | Clostridia    | 0                   | 0                    | 12                  | 0                    |
| <b>seq868</b>  | Firmicutes    | Clostridia    | 0                   | 0                    | 0                   | 0                    |
| <b>seq884</b>  | Firmicutes    | Clostridia    | 0                   | 0                    | 0                   | 0                    |
| <b>seq904</b>  | Firmicutes    | Clostridia    | 0                   | 0                    | 34                  | 47                   |
| <b>seq946</b>  | Firmicutes    | Clostridia    | 0                   | 0                    | 0                   | 11                   |
| <b>seq967</b>  | Firmicutes    | Clostridia    | 0                   | 0                    | 0                   | 0                    |
| <b>seq968</b>  | Firmicutes    | Clostridia    | 0                   | 0                    | 0                   | 0                    |

Sequence Count Table

|                | <b>Phylum</b> | <b>Class</b>  | <b>Subject27WK0</b> | <b>Subject27WK12</b> | <b>Subject15WK0</b> | <b>Subject15WK12</b> |
|----------------|---------------|---------------|---------------------|----------------------|---------------------|----------------------|
| <b>seq1176</b> | Firmicutes    | Negativicutes | 0                   | 0                    | 0                   | 0                    |
| <b>seq18</b>   | Firmicutes    | Negativicutes | 2715                | 2458                 | 2140                | 1547                 |
| <b>seq57</b>   | Firmicutes    | Negativicutes | 0                   | 0                    | 0                   | 0                    |
| <b>seq439</b>  | Firmicutes    | Negativicutes | 0                   | 0                    | 0                   | 0                    |
| <b>seq467</b>  | Firmicutes    | Negativicutes | 0                   | 0                    | 0                   | 0                    |
| <b>seq1224</b> | Firmicutes    | Negativicutes | 0                   | 0                    | 0                   | 0                    |
| <b>seq167</b>  | Firmicutes    | Negativicutes | 0                   | 0                    | 0                   | 0                    |
| <b>seq630</b>  | Firmicutes    | Bacilli       | 32                  | 33                   | 0                   | 23                   |
| <b>seq1099</b> | Firmicutes    | Clostridia    | 0                   | 0                    | 0                   | 0                    |
| <b>seq1750</b> | Firmicutes    | Clostridia    | 0                   | 0                    | 0                   | 0                    |
| <b>seq100</b>  | Firmicutes    | Clostridia    | 0                   | 226                  | 0                   | 0                    |
| <b>seq123</b>  | Firmicutes    | Clostridia    | 0                   | 0                    | 0                   | 0                    |
| <b>seq214</b>  | Firmicutes    | Clostridia    | 0                   | 0                    | 0                   | 0                    |
| <b>seq486</b>  | Firmicutes    | Clostridia    | 0                   | 0                    | 0                   | 0                    |
| <b>seq496</b>  | Firmicutes    | Clostridia    | 0                   | 0                    | 0                   | 0                    |
| <b>seq547</b>  | Firmicutes    | Clostridia    | 0                   | 0                    | 0                   | 0                    |
| <b>seq579</b>  | Firmicutes    | Clostridia    | 0                   | 0                    | 0                   | 0                    |
| <b>seq605</b>  | Firmicutes    | Clostridia    | 0                   | 0                    | 0                   | 0                    |
| <b>seq680</b>  | Firmicutes    | Clostridia    | 0                   | 0                    | 0                   | 0                    |
| <b>seq711</b>  | Firmicutes    | Clostridia    | 0                   | 0                    | 0                   | 0                    |
| <b>seq713</b>  | Firmicutes    | Clostridia    | 0                   | 25                   | 0                   | 0                    |
| <b>seq731</b>  | Firmicutes    | Clostridia    | 0                   | 0                    | 0                   | 0                    |
| <b>seq770</b>  | Firmicutes    | Clostridia    | 0                   | 0                    | 0                   | 0                    |
| <b>seq806</b>  | Firmicutes    | Clostridia    | 0                   | 0                    | 0                   | 0                    |
| <b>seq852</b>  | Firmicutes    | Clostridia    | 0                   | 0                    | 0                   | 0                    |
| <b>seq857</b>  | Firmicutes    | Clostridia    | 0                   | 0                    | 0                   | 0                    |
| <b>seq868</b>  | Firmicutes    | Clostridia    | 0                   | 0                    | 0                   | 0                    |
| <b>seq884</b>  | Firmicutes    | Clostridia    | 0                   | 0                    | 0                   | 0                    |
| <b>seq904</b>  | Firmicutes    | Clostridia    | 0                   | 0                    | 0                   | 0                    |
| <b>seq946</b>  | Firmicutes    | Clostridia    | 0                   | 0                    | 0                   | 0                    |
| <b>seq967</b>  | Firmicutes    | Clostridia    | 0                   | 0                    | 0                   | 0                    |
| <b>seq968</b>  | Firmicutes    | Clostridia    | 0                   | 0                    | 0                   | 0                    |

Sequence Count Table

|                | <b>Phylum</b> | <b>Class</b>  | <b>Δ</b> |  |  |  |
|----------------|---------------|---------------|----------|--|--|--|
| <b>seq1176</b> | Firmicutes    | Negativicutes |          |  |  |  |
| <b>seq18</b>   | Firmicutes    | Negativicutes |          |  |  |  |
| <b>seq57</b>   | Firmicutes    | Negativicutes |          |  |  |  |
| <b>seq439</b>  | Firmicutes    | Negativicutes |          |  |  |  |
| <b>seq467</b>  | Firmicutes    | Negativicutes |          |  |  |  |
| <b>seq1224</b> | Firmicutes    | Negativicutes |          |  |  |  |
| <b>seq167</b>  | Firmicutes    | Negativicutes |          |  |  |  |
| <b>seq630</b>  | Firmicutes    | Bacilli       |          |  |  |  |
| <b>seq1099</b> | Firmicutes    | Clostridia    |          |  |  |  |
| <b>seq1750</b> | Firmicutes    | Clostridia    |          |  |  |  |
| <b>seq100</b>  | Firmicutes    | Clostridia    |          |  |  |  |
| <b>seq123</b>  | Firmicutes    | Clostridia    |          |  |  |  |
| <b>seq214</b>  | Firmicutes    | Clostridia    |          |  |  |  |
| <b>seq486</b>  | Firmicutes    | Clostridia    |          |  |  |  |
| <b>seq496</b>  | Firmicutes    | Clostridia    |          |  |  |  |
| <b>seq547</b>  | Firmicutes    | Clostridia    |          |  |  |  |
| <b>seq579</b>  | Firmicutes    | Clostridia    |          |  |  |  |
| <b>seq605</b>  | Firmicutes    | Clostridia    |          |  |  |  |
| <b>seq680</b>  | Firmicutes    | Clostridia    |          |  |  |  |
| <b>seq711</b>  | Firmicutes    | Clostridia    |          |  |  |  |
| <b>seq713</b>  | Firmicutes    | Clostridia    |          |  |  |  |
| <b>seq731</b>  | Firmicutes    | Clostridia    |          |  |  |  |
| <b>seq770</b>  | Firmicutes    | Clostridia    |          |  |  |  |
| <b>seq806</b>  | Firmicutes    | Clostridia    |          |  |  |  |
| <b>seq852</b>  | Firmicutes    | Clostridia    |          |  |  |  |
| <b>seq857</b>  | Firmicutes    | Clostridia    |          |  |  |  |
| <b>seq868</b>  | Firmicutes    | Clostridia    |          |  |  |  |
| <b>seq884</b>  | Firmicutes    | Clostridia    |          |  |  |  |
| <b>seq904</b>  | Firmicutes    | Clostridia    |          |  |  |  |
| <b>seq946</b>  | Firmicutes    | Clostridia    |          |  |  |  |
| <b>seq967</b>  | Firmicutes    | Clostridia    |          |  |  |  |
| <b>seq968</b>  | Firmicutes    | Clostridia    |          |  |  |  |

Sequence Count Table

|                | <b>Phylum</b> | <b>Class</b> | <b>Order</b>  | <b>Family</b>       |
|----------------|---------------|--------------|---------------|---------------------|
| <b>seq991</b>  | Firmicutes    | Clostridia   | Clostridiales | Christensenellaceae |
| <b>seq998</b>  | Firmicutes    | Clostridia   | Clostridiales | Christensenellaceae |
| <b>seq1020</b> | Firmicutes    | Clostridia   | Clostridiales | Christensenellaceae |
| <b>seq1179</b> | Firmicutes    | Clostridia   | Clostridiales | Christensenellaceae |
| <b>seq1185</b> | Firmicutes    | Clostridia   | Clostridiales | Christensenellaceae |
| <b>seq1200</b> | Firmicutes    | Clostridia   | Clostridiales | Christensenellaceae |
| <b>seq1204</b> | Firmicutes    | Clostridia   | Clostridiales | Christensenellaceae |
| <b>seq1434</b> | Firmicutes    | Clostridia   | Clostridiales | Christensenellaceae |
| <b>seq1462</b> | Firmicutes    | Clostridia   | Clostridiales | Christensenellaceae |
| <b>seq1478</b> | Firmicutes    | Clostridia   | Clostridiales | Christensenellaceae |
| <b>seq1584</b> | Firmicutes    | Clostridia   | Clostridiales | Christensenellaceae |
| <b>seq1586</b> | Firmicutes    | Clostridia   | Clostridiales | Christensenellaceae |
| <b>seq1601</b> | Firmicutes    | Clostridia   | Clostridiales | Christensenellaceae |
| <b>seq1666</b> | Firmicutes    | Clostridia   | Clostridiales | Christensenellaceae |
| <b>seq1788</b> | Firmicutes    | Clostridia   | Clostridiales | Christensenellaceae |
| <b>seq1797</b> | Firmicutes    | Clostridia   | Clostridiales | Christensenellaceae |
| <b>seq1805</b> | Firmicutes    | Clostridia   | Clostridiales | Christensenellaceae |
| <b>seq1879</b> | Firmicutes    | Clostridia   | Clostridiales | Christensenellaceae |
| <b>seq812</b>  | Firmicutes    | Clostridia   | Clostridiales | Christensenellaceae |
| <b>seq831</b>  | Firmicutes    | Clostridia   | Clostridiales | Christensenellaceae |
| <b>seq881</b>  | Firmicutes    | Clostridia   | Clostridiales | Christensenellaceae |
| <b>seq1228</b> | Firmicutes    | Clostridia   | Clostridiales | Christensenellaceae |
| <b>seq1270</b> | Firmicutes    | Clostridia   | Clostridiales | Christensenellaceae |
| <b>seq1300</b> | Firmicutes    | Clostridia   | Clostridiales | Christensenellaceae |
| <b>seq1355</b> | Firmicutes    | Clostridia   | Clostridiales | Christensenellaceae |
| <b>seq1419</b> | Firmicutes    | Clostridia   | Clostridiales | Christensenellaceae |
| <b>seq1423</b> | Firmicutes    | Clostridia   | Clostridiales | Christensenellaceae |
| <b>seq1438</b> | Firmicutes    | Clostridia   | Clostridiales | Christensenellaceae |
| <b>seq1506</b> | Firmicutes    | Clostridia   | Clostridiales | Christensenellaceae |
| <b>seq1514</b> | Firmicutes    | Clostridia   | Clostridiales | Christensenellaceae |
| <b>seq1529</b> | Firmicutes    | Clostridia   | Clostridiales | Christensenellaceae |
| <b>seq1555</b> | Firmicutes    | Clostridia   | Clostridiales | Christensenellaceae |



Sequence Count Table

|                | <b>Phylum</b> | <b>Class</b> | <b>Genus</b>                  | <b>Species</b> |
|----------------|---------------|--------------|-------------------------------|----------------|
| <b>seq991</b>  | Firmicutes    | Clostridia   | Christensenellaceae_R-7_group |                |
| <b>seq998</b>  | Firmicutes    | Clostridia   | Christensenellaceae_R-7_group |                |
| <b>seq1020</b> | Firmicutes    | Clostridia   | Christensenellaceae_R-7_group |                |
| <b>seq1179</b> | Firmicutes    | Clostridia   | Christensenellaceae_R-7_group |                |
| <b>seq1185</b> | Firmicutes    | Clostridia   | Christensenellaceae_R-7_group |                |
| <b>seq1200</b> | Firmicutes    | Clostridia   | Christensenellaceae_R-7_group |                |
| <b>seq1204</b> | Firmicutes    | Clostridia   | Christensenellaceae_R-7_group |                |
| <b>seq1434</b> | Firmicutes    | Clostridia   | Christensenellaceae_R-7_group |                |
| <b>seq1462</b> | Firmicutes    | Clostridia   | Christensenellaceae_R-7_group |                |
| <b>seq1478</b> | Firmicutes    | Clostridia   | Christensenellaceae_R-7_group |                |
| <b>seq1584</b> | Firmicutes    | Clostridia   | Christensenellaceae_R-7_group |                |
| <b>seq1586</b> | Firmicutes    | Clostridia   | Christensenellaceae_R-7_group |                |
| <b>seq1601</b> | Firmicutes    | Clostridia   | Christensenellaceae_R-7_group |                |
| <b>seq1666</b> | Firmicutes    | Clostridia   | Christensenellaceae_R-7_group |                |
| <b>seq1788</b> | Firmicutes    | Clostridia   | Christensenellaceae_R-7_group |                |
| <b>seq1797</b> | Firmicutes    | Clostridia   | Christensenellaceae_R-7_group |                |
| <b>seq1805</b> | Firmicutes    | Clostridia   | Christensenellaceae_R-7_group |                |
| <b>seq1879</b> | Firmicutes    | Clostridia   | Christensenellaceae_R-7_group |                |
| <b>seq812</b>  | Firmicutes    | Clostridia   |                               |                |
| <b>seq831</b>  | Firmicutes    | Clostridia   |                               |                |
| <b>seq881</b>  | Firmicutes    | Clostridia   |                               |                |
| <b>seq1228</b> | Firmicutes    | Clostridia   |                               |                |
| <b>seq1270</b> | Firmicutes    | Clostridia   |                               |                |
| <b>seq1300</b> | Firmicutes    | Clostridia   |                               |                |
| <b>seq1355</b> | Firmicutes    | Clostridia   |                               |                |
| <b>seq1419</b> | Firmicutes    | Clostridia   |                               |                |
| <b>seq1423</b> | Firmicutes    | Clostridia   |                               |                |
| <b>seq1438</b> | Firmicutes    | Clostridia   |                               |                |
| <b>seq1506</b> | Firmicutes    | Clostridia   |                               |                |
| <b>seq1514</b> | Firmicutes    | Clostridia   |                               |                |
| <b>seq1529</b> | Firmicutes    | Clostridia   |                               |                |
| <b>seq1555</b> | Firmicutes    | Clostridia   |                               |                |

Sequence Count Table

|                | <b>Phylum</b> | <b>Class</b> | <b>Subject34WK0</b> | <b>Subject34WK12</b> | <b>Subject16WK0</b> | <b>Subject16WK12</b> |
|----------------|---------------|--------------|---------------------|----------------------|---------------------|----------------------|
| <b>seq991</b>  | Firmicutes    | Clostridia   | 0                   | 0                    | 0                   | 0                    |
| <b>seq998</b>  | Firmicutes    | Clostridia   | 0                   | 0                    | 5                   | 0                    |
| <b>seq1020</b> | Firmicutes    | Clostridia   | 0                   | 0                    | 0                   | 0                    |
| <b>seq1179</b> | Firmicutes    | Clostridia   | 0                   | 0                    | 0                   | 0                    |
| <b>seq1185</b> | Firmicutes    | Clostridia   | 0                   | 0                    | 0                   | 0                    |
| <b>seq1200</b> | Firmicutes    | Clostridia   | 0                   | 0                    | 0                   | 0                    |
| <b>seq1204</b> | Firmicutes    | Clostridia   | 0                   | 0                    | 0                   | 0                    |
| <b>seq1434</b> | Firmicutes    | Clostridia   | 0                   | 0                    | 0                   | 0                    |
| <b>seq1462</b> | Firmicutes    | Clostridia   | 0                   | 0                    | 0                   | 0                    |
| <b>seq1478</b> | Firmicutes    | Clostridia   | 0                   | 0                    | 0                   | 0                    |
| <b>seq1584</b> | Firmicutes    | Clostridia   | 0                   | 0                    | 0                   | 0                    |
| <b>seq1586</b> | Firmicutes    | Clostridia   | 0                   | 0                    | 0                   | 0                    |
| <b>seq1601</b> | Firmicutes    | Clostridia   | 0                   | 0                    | 0                   | 0                    |
| <b>seq1666</b> | Firmicutes    | Clostridia   | 0                   | 0                    | 0                   | 0                    |
| <b>seq1788</b> | Firmicutes    | Clostridia   | 0                   | 0                    | 0                   | 0                    |
| <b>seq1797</b> | Firmicutes    | Clostridia   | 0                   | 0                    | 0                   | 0                    |
| <b>seq1805</b> | Firmicutes    | Clostridia   | 0                   | 0                    | 0                   | 0                    |
| <b>seq1879</b> | Firmicutes    | Clostridia   | 0                   | 0                    | 0                   | 0                    |
| <b>seq812</b>  | Firmicutes    | Clostridia   | 0                   | 0                    | 0                   | 0                    |
| <b>seq831</b>  | Firmicutes    | Clostridia   | 0                   | 0                    | 0                   | 17                   |
| <b>seq881</b>  | Firmicutes    | Clostridia   | 0                   | 0                    | 20                  | 40                   |
| <b>seq1228</b> | Firmicutes    | Clostridia   | 0                   | 0                    | 0                   | 0                    |
| <b>seq1270</b> | Firmicutes    | Clostridia   | 0                   | 0                    | 0                   | 0                    |
| <b>seq1300</b> | Firmicutes    | Clostridia   | 0                   | 0                    | 0                   | 0                    |
| <b>seq1355</b> | Firmicutes    | Clostridia   | 0                   | 0                    | 0                   | 0                    |
| <b>seq1419</b> | Firmicutes    | Clostridia   | 0                   | 0                    | 0                   | 0                    |
| <b>seq1423</b> | Firmicutes    | Clostridia   | 0                   | 0                    | 0                   | 0                    |
| <b>seq1438</b> | Firmicutes    | Clostridia   | 0                   | 0                    | 0                   | 0                    |
| <b>seq1506</b> | Firmicutes    | Clostridia   | 0                   | 0                    | 0                   | 0                    |
| <b>seq1514</b> | Firmicutes    | Clostridia   | 0                   | 0                    | 0                   | 0                    |
| <b>seq1529</b> | Firmicutes    | Clostridia   | 0                   | 0                    | 0                   | 0                    |
| <b>seq1555</b> | Firmicutes    | Clostridia   | 0                   | 0                    | 0                   | 0                    |

Sequence Count Table

|                | <b>Phylum</b> | <b>Class</b> | <b>Subject17WK0</b> | <b>Subject17WK12</b> | <b>Subject1WK0</b> | <b>Subject1WK12</b> |
|----------------|---------------|--------------|---------------------|----------------------|--------------------|---------------------|
| <b>seq991</b>  | Firmicutes    | Clostridia   | 0                   | 0                    | 0                  | 0                   |
| <b>seq998</b>  | Firmicutes    | Clostridia   | 0                   | 0                    | 0                  | 0                   |
| <b>seq1020</b> | Firmicutes    | Clostridia   | 0                   | 0                    | 0                  | 0                   |
| <b>seq1179</b> | Firmicutes    | Clostridia   | 0                   | 0                    | 0                  | 0                   |
| <b>seq1185</b> | Firmicutes    | Clostridia   | 0                   | 0                    | 0                  | 0                   |
| <b>seq1200</b> | Firmicutes    | Clostridia   | 0                   | 0                    | 0                  | 0                   |
| <b>seq1204</b> | Firmicutes    | Clostridia   | 0                   | 0                    | 0                  | 0                   |
| <b>seq1434</b> | Firmicutes    | Clostridia   | 0                   | 0                    | 0                  | 0                   |
| <b>seq1462</b> | Firmicutes    | Clostridia   | 0                   | 0                    | 0                  | 0                   |
| <b>seq1478</b> | Firmicutes    | Clostridia   | 0                   | 0                    | 0                  | 0                   |
| <b>seq1584</b> | Firmicutes    | Clostridia   | 0                   | 0                    | 0                  | 0                   |
| <b>seq1586</b> | Firmicutes    | Clostridia   | 0                   | 0                    | 0                  | 0                   |
| <b>seq1601</b> | Firmicutes    | Clostridia   | 0                   | 0                    | 12                 | 7                   |
| <b>seq1666</b> | Firmicutes    | Clostridia   | 0                   | 0                    | 0                  | 0                   |
| <b>seq1788</b> | Firmicutes    | Clostridia   | 0                   | 0                    | 0                  | 0                   |
| <b>seq1797</b> | Firmicutes    | Clostridia   | 0                   | 0                    | 0                  | 0                   |
| <b>seq1805</b> | Firmicutes    | Clostridia   | 0                   | 0                    | 0                  | 0                   |
| <b>seq1879</b> | Firmicutes    | Clostridia   | 0                   | 0                    | 0                  | 0                   |
| <b>seq812</b>  | Firmicutes    | Clostridia   | 17                  | 0                    | 32                 | 36                  |
| <b>seq831</b>  | Firmicutes    | Clostridia   | 0                   | 0                    | 0                  | 0                   |
| <b>seq881</b>  | Firmicutes    | Clostridia   | 13                  | 0                    | 0                  | 0                   |
| <b>seq1228</b> | Firmicutes    | Clostridia   | 0                   | 0                    | 0                  | 0                   |
| <b>seq1270</b> | Firmicutes    | Clostridia   | 0                   | 0                    | 27                 | 28                  |
| <b>seq1300</b> | Firmicutes    | Clostridia   | 0                   | 0                    | 0                  | 0                   |
| <b>seq1355</b> | Firmicutes    | Clostridia   | 0                   | 0                    | 0                  | 0                   |
| <b>seq1419</b> | Firmicutes    | Clostridia   | 0                   | 0                    | 0                  | 0                   |
| <b>seq1423</b> | Firmicutes    | Clostridia   | 5                   | 0                    | 0                  | 0                   |
| <b>seq1438</b> | Firmicutes    | Clostridia   | 0                   | 0                    | 0                  | 0                   |
| <b>seq1506</b> | Firmicutes    | Clostridia   | 0                   | 0                    | 0                  | 0                   |
| <b>seq1514</b> | Firmicutes    | Clostridia   | 0                   | 0                    | 0                  | 0                   |
| <b>seq1529</b> | Firmicutes    | Clostridia   | 0                   | 0                    | 0                  | 0                   |
| <b>seq1555</b> | Firmicutes    | Clostridia   | 0                   | 0                    | 0                  | 0                   |

Sequence Count Table

|                | <b>Phylum</b> | <b>Class</b> | <b>Subject2WK0</b> | <b>Subject2WK12</b> | <b>Subject3WK0</b> | <b>Subject3WK12</b> |
|----------------|---------------|--------------|--------------------|---------------------|--------------------|---------------------|
| <b>seq991</b>  | Firmicutes    | Clostridia   | 0                  | 0                   | 0                  | 0                   |
| <b>seq998</b>  | Firmicutes    | Clostridia   | 0                  | 0                   | 0                  | 0                   |
| <b>seq1020</b> | Firmicutes    | Clostridia   | 0                  | 0                   | 0                  | 0                   |
| <b>seq1179</b> | Firmicutes    | Clostridia   | 0                  | 0                   | 0                  | 0                   |
| <b>seq1185</b> | Firmicutes    | Clostridia   | 0                  | 0                   | 0                  | 0                   |
| <b>seq1200</b> | Firmicutes    | Clostridia   | 0                  | 0                   | 0                  | 0                   |
| <b>seq1204</b> | Firmicutes    | Clostridia   | 0                  | 0                   | 0                  | 0                   |
| <b>seq1434</b> | Firmicutes    | Clostridia   | 0                  | 0                   | 0                  | 0                   |
| <b>seq1462</b> | Firmicutes    | Clostridia   | 0                  | 0                   | 0                  | 0                   |
| <b>seq1478</b> | Firmicutes    | Clostridia   | 0                  | 0                   | 0                  | 0                   |
| <b>seq1584</b> | Firmicutes    | Clostridia   | 0                  | 0                   | 0                  | 0                   |
| <b>seq1586</b> | Firmicutes    | Clostridia   | 0                  | 0                   | 0                  | 0                   |
| <b>seq1601</b> | Firmicutes    | Clostridia   | 0                  | 0                   | 0                  | 0                   |
| <b>seq1666</b> | Firmicutes    | Clostridia   | 0                  | 0                   | 0                  | 0                   |
| <b>seq1788</b> | Firmicutes    | Clostridia   | 0                  | 0                   | 0                  | 0                   |
| <b>seq1797</b> | Firmicutes    | Clostridia   | 0                  | 0                   | 0                  | 0                   |
| <b>seq1805</b> | Firmicutes    | Clostridia   | 0                  | 0                   | 0                  | 0                   |
| <b>seq1879</b> | Firmicutes    | Clostridia   | 0                  | 0                   | 0                  | 0                   |
| <b>seq812</b>  | Firmicutes    | Clostridia   | 0                  | 0                   | 0                  | 0                   |
| <b>seq831</b>  | Firmicutes    | Clostridia   | 9                  | 9                   | 0                  | 0                   |
| <b>seq881</b>  | Firmicutes    | Clostridia   | 0                  | 0                   | 0                  | 0                   |
| <b>seq1228</b> | Firmicutes    | Clostridia   | 0                  | 0                   | 0                  | 0                   |
| <b>seq1270</b> | Firmicutes    | Clostridia   | 0                  | 0                   | 0                  | 0                   |
| <b>seq1300</b> | Firmicutes    | Clostridia   | 0                  | 0                   | 0                  | 0                   |
| <b>seq1355</b> | Firmicutes    | Clostridia   | 0                  | 0                   | 0                  | 0                   |
| <b>seq1419</b> | Firmicutes    | Clostridia   | 0                  | 0                   | 0                  | 0                   |
| <b>seq1423</b> | Firmicutes    | Clostridia   | 0                  | 0                   | 0                  | 0                   |
| <b>seq1438</b> | Firmicutes    | Clostridia   | 0                  | 0                   | 0                  | 0                   |
| <b>seq1506</b> | Firmicutes    | Clostridia   | 0                  | 0                   | 0                  | 0                   |
| <b>seq1514</b> | Firmicutes    | Clostridia   | 0                  | 0                   | 0                  | 0                   |
| <b>seq1529</b> | Firmicutes    | Clostridia   | 0                  | 0                   | 0                  | 0                   |
| <b>seq1555</b> | Firmicutes    | Clostridia   | 0                  | 0                   | 0                  | 0                   |

Sequence Count Table

|                | <b>Phylum</b> | <b>Class</b> | <b>Subject4WK0</b> | <b>Subject4WK12</b> | <b>Subject5WK0</b> | <b>Subject5WK12</b> |
|----------------|---------------|--------------|--------------------|---------------------|--------------------|---------------------|
| <b>seq991</b>  | Firmicutes    | Clostridia   | 0                  | 0                   | 0                  | 0                   |
| <b>seq998</b>  | Firmicutes    | Clostridia   | 0                  | 0                   | 0                  | 0                   |
| <b>seq1020</b> | Firmicutes    | Clostridia   | 44                 | 27                  | 0                  | 0                   |
| <b>seq1179</b> | Firmicutes    | Clostridia   | 0                  | 0                   | 0                  | 0                   |
| <b>seq1185</b> | Firmicutes    | Clostridia   | 0                  | 0                   | 0                  | 0                   |
| <b>seq1200</b> | Firmicutes    | Clostridia   | 0                  | 0                   | 0                  | 0                   |
| <b>seq1204</b> | Firmicutes    | Clostridia   | 0                  | 0                   | 0                  | 0                   |
| <b>seq1434</b> | Firmicutes    | Clostridia   | 0                  | 0                   | 0                  | 0                   |
| <b>seq1462</b> | Firmicutes    | Clostridia   | 0                  | 0                   | 0                  | 0                   |
| <b>seq1478</b> | Firmicutes    | Clostridia   | 0                  | 0                   | 0                  | 0                   |
| <b>seq1584</b> | Firmicutes    | Clostridia   | 0                  | 0                   | 0                  | 0                   |
| <b>seq1586</b> | Firmicutes    | Clostridia   | 0                  | 0                   | 0                  | 0                   |
| <b>seq1601</b> | Firmicutes    | Clostridia   | 0                  | 0                   | 0                  | 0                   |
| <b>seq1666</b> | Firmicutes    | Clostridia   | 0                  | 0                   | 0                  | 0                   |
| <b>seq1788</b> | Firmicutes    | Clostridia   | 8                  | 0                   | 0                  | 0                   |
| <b>seq1797</b> | Firmicutes    | Clostridia   | 0                  | 0                   | 0                  | 0                   |
| <b>seq1805</b> | Firmicutes    | Clostridia   | 7                  | 0                   | 0                  | 0                   |
| <b>seq1879</b> | Firmicutes    | Clostridia   | 0                  | 0                   | 0                  | 0                   |
| <b>seq812</b>  | Firmicutes    | Clostridia   | 19                 | 0                   | 10                 | 0                   |
| <b>seq831</b>  | Firmicutes    | Clostridia   | 0                  | 0                   | 0                  | 0                   |
| <b>seq881</b>  | Firmicutes    | Clostridia   | 0                  | 0                   | 0                  | 0                   |
| <b>seq1228</b> | Firmicutes    | Clostridia   | 0                  | 0                   | 0                  | 0                   |
| <b>seq1270</b> | Firmicutes    | Clostridia   | 0                  | 0                   | 0                  | 0                   |
| <b>seq1300</b> | Firmicutes    | Clostridia   | 0                  | 0                   | 0                  | 0                   |
| <b>seq1355</b> | Firmicutes    | Clostridia   | 25                 | 19                  | 0                  | 0                   |
| <b>seq1419</b> | Firmicutes    | Clostridia   | 0                  | 0                   | 0                  | 0                   |
| <b>seq1423</b> | Firmicutes    | Clostridia   | 0                  | 0                   | 0                  | 0                   |
| <b>seq1438</b> | Firmicutes    | Clostridia   | 0                  | 0                   | 0                  | 0                   |
| <b>seq1506</b> | Firmicutes    | Clostridia   | 0                  | 0                   | 0                  | 0                   |
| <b>seq1514</b> | Firmicutes    | Clostridia   | 0                  | 0                   | 0                  | 0                   |
| <b>seq1529</b> | Firmicutes    | Clostridia   | 0                  | 0                   | 0                  | 0                   |
| <b>seq1555</b> | Firmicutes    | Clostridia   | 0                  | 0                   | 0                  | 0                   |

Sequence Count Table

|                | <b>Phylum</b> | <b>Class</b> | <b>Subject6WK0</b> | <b>Subject6WK12</b> | <b>Subject18WK0</b> | <b>Subject18WK12</b> |
|----------------|---------------|--------------|--------------------|---------------------|---------------------|----------------------|
| <b>seq991</b>  | Firmicutes    | Clostridia   | 0                  | 10                  | 0                   | 0                    |
| <b>seq998</b>  | Firmicutes    | Clostridia   | 0                  | 0                   | 0                   | 0                    |
| <b>seq1020</b> | Firmicutes    | Clostridia   | 0                  | 0                   | 0                   | 0                    |
| <b>seq1179</b> | Firmicutes    | Clostridia   | 0                  | 0                   | 0                   | 0                    |
| <b>seq1185</b> | Firmicutes    | Clostridia   | 0                  | 0                   | 0                   | 0                    |
| <b>seq1200</b> | Firmicutes    | Clostridia   | 0                  | 0                   | 0                   | 0                    |
| <b>seq1204</b> | Firmicutes    | Clostridia   | 0                  | 0                   | 0                   | 0                    |
| <b>seq1434</b> | Firmicutes    | Clostridia   | 0                  | 0                   | 0                   | 0                    |
| <b>seq1462</b> | Firmicutes    | Clostridia   | 0                  | 0                   | 0                   | 0                    |
| <b>seq1478</b> | Firmicutes    | Clostridia   | 0                  | 0                   | 0                   | 0                    |
| <b>seq1584</b> | Firmicutes    | Clostridia   | 0                  | 0                   | 0                   | 0                    |
| <b>seq1586</b> | Firmicutes    | Clostridia   | 0                  | 0                   | 0                   | 0                    |
| <b>seq1601</b> | Firmicutes    | Clostridia   | 0                  | 0                   | 0                   | 0                    |
| <b>seq1666</b> | Firmicutes    | Clostridia   | 0                  | 0                   | 0                   | 0                    |
| <b>seq1788</b> | Firmicutes    | Clostridia   | 0                  | 0                   | 0                   | 0                    |
| <b>seq1797</b> | Firmicutes    | Clostridia   | 0                  | 0                   | 0                   | 0                    |
| <b>seq1805</b> | Firmicutes    | Clostridia   | 0                  | 0                   | 0                   | 0                    |
| <b>seq1879</b> | Firmicutes    | Clostridia   | 0                  | 4                   | 0                   | 0                    |
| <b>seq812</b>  | Firmicutes    | Clostridia   | 0                  | 13                  | 18                  | 0                    |
| <b>seq831</b>  | Firmicutes    | Clostridia   | 0                  | 0                   | 0                   | 0                    |
| <b>seq881</b>  | Firmicutes    | Clostridia   | 0                  | 0                   | 0                   | 0                    |
| <b>seq1228</b> | Firmicutes    | Clostridia   | 0                  | 0                   | 0                   | 0                    |
| <b>seq1270</b> | Firmicutes    | Clostridia   | 2                  | 2                   | 0                   | 0                    |
| <b>seq1300</b> | Firmicutes    | Clostridia   | 0                  | 0                   | 0                   | 0                    |
| <b>seq1355</b> | Firmicutes    | Clostridia   | 0                  | 0                   | 0                   | 0                    |
| <b>seq1419</b> | Firmicutes    | Clostridia   | 0                  | 0                   | 0                   | 0                    |
| <b>seq1423</b> | Firmicutes    | Clostridia   | 0                  | 0                   | 0                   | 0                    |
| <b>seq1438</b> | Firmicutes    | Clostridia   | 17                 | 19                  | 0                   | 0                    |
| <b>seq1506</b> | Firmicutes    | Clostridia   | 0                  | 0                   | 0                   | 0                    |
| <b>seq1514</b> | Firmicutes    | Clostridia   | 0                  | 0                   | 0                   | 0                    |
| <b>seq1529</b> | Firmicutes    | Clostridia   | 0                  | 0                   | 0                   | 0                    |
| <b>seq1555</b> | Firmicutes    | Clostridia   | 0                  | 0                   | 0                   | 0                    |

Sequence Count Table

|                | <b>Phylum</b> | <b>Class</b> | <b>Subject19WK0</b> | <b>Subject19WK12</b> | <b>Subject20WK0</b> | <b>Subject20WK12</b> |
|----------------|---------------|--------------|---------------------|----------------------|---------------------|----------------------|
| <b>seq991</b>  | Firmicutes    | Clostridia   | 0                   | 0                    | 0                   | 0                    |
| <b>seq998</b>  | Firmicutes    | Clostridia   | 0                   | 0                    | 74                  | 64                   |
| <b>seq1020</b> | Firmicutes    | Clostridia   | 0                   | 0                    | 0                   | 0                    |
| <b>seq1179</b> | Firmicutes    | Clostridia   | 0                   | 0                    | 86                  | 0                    |
| <b>seq1185</b> | Firmicutes    | Clostridia   | 0                   | 0                    | 0                   | 0                    |
| <b>seq1200</b> | Firmicutes    | Clostridia   | 0                   | 0                    | 0                   | 0                    |
| <b>seq1204</b> | Firmicutes    | Clostridia   | 0                   | 0                    | 0                   | 0                    |
| <b>seq1434</b> | Firmicutes    | Clostridia   | 0                   | 0                    | 0                   | 0                    |
| <b>seq1462</b> | Firmicutes    | Clostridia   | 0                   | 0                    | 0                   | 0                    |
| <b>seq1478</b> | Firmicutes    | Clostridia   | 0                   | 0                    | 0                   | 0                    |
| <b>seq1584</b> | Firmicutes    | Clostridia   | 0                   | 0                    | 0                   | 0                    |
| <b>seq1586</b> | Firmicutes    | Clostridia   | 0                   | 0                    | 0                   | 0                    |
| <b>seq1601</b> | Firmicutes    | Clostridia   | 0                   | 0                    | 0                   | 0                    |
| <b>seq1666</b> | Firmicutes    | Clostridia   | 0                   | 0                    | 0                   | 0                    |
| <b>seq1788</b> | Firmicutes    | Clostridia   | 0                   | 0                    | 0                   | 0                    |
| <b>seq1797</b> | Firmicutes    | Clostridia   | 0                   | 0                    | 0                   | 0                    |
| <b>seq1805</b> | Firmicutes    | Clostridia   | 0                   | 0                    | 0                   | 0                    |
| <b>seq1879</b> | Firmicutes    | Clostridia   | 0                   | 0                    | 0                   | 0                    |
| <b>seq812</b>  | Firmicutes    | Clostridia   | 0                   | 12                   | 0                   | 0                    |
| <b>seq831</b>  | Firmicutes    | Clostridia   | 11                  | 0                    | 0                   | 0                    |
| <b>seq881</b>  | Firmicutes    | Clostridia   | 0                   | 0                    | 0                   | 0                    |
| <b>seq1228</b> | Firmicutes    | Clostridia   | 0                   | 0                    | 0                   | 0                    |
| <b>seq1270</b> | Firmicutes    | Clostridia   | 0                   | 0                    | 0                   | 0                    |
| <b>seq1300</b> | Firmicutes    | Clostridia   | 0                   | 28                   | 11                  | 0                    |
| <b>seq1355</b> | Firmicutes    | Clostridia   | 0                   | 0                    | 0                   | 0                    |
| <b>seq1419</b> | Firmicutes    | Clostridia   | 0                   | 0                    | 23                  | 16                   |
| <b>seq1423</b> | Firmicutes    | Clostridia   | 0                   | 0                    | 0                   | 0                    |
| <b>seq1438</b> | Firmicutes    | Clostridia   | 0                   | 0                    | 0                   | 0                    |
| <b>seq1506</b> | Firmicutes    | Clostridia   | 0                   | 0                    | 0                   | 0                    |
| <b>seq1514</b> | Firmicutes    | Clostridia   | 0                   | 0                    | 0                   | 0                    |
| <b>seq1529</b> | Firmicutes    | Clostridia   | 0                   | 0                    | 0                   | 0                    |
| <b>seq1555</b> | Firmicutes    | Clostridia   | 0                   | 0                    | 0                   | 0                    |

Sequence Count Table

|                | <b>Phylum</b> | <b>Class</b> | <b>Subject7WK0</b> | <b>Subject7WK12</b> | <b>Subject21WK0</b> | <b>Subject21WK12</b> |
|----------------|---------------|--------------|--------------------|---------------------|---------------------|----------------------|
| <b>seq991</b>  | Firmicutes    | Clostridia   | 0                  | 0                   | 0                   | 0                    |
| <b>seq998</b>  | Firmicutes    | Clostridia   | 0                  | 0                   | 0                   | 0                    |
| <b>seq1020</b> | Firmicutes    | Clostridia   | 0                  | 0                   | 0                   | 0                    |
| <b>seq1179</b> | Firmicutes    | Clostridia   | 0                  | 0                   | 0                   | 0                    |
| <b>seq1185</b> | Firmicutes    | Clostridia   | 0                  | 0                   | 0                   | 0                    |
| <b>seq1200</b> | Firmicutes    | Clostridia   | 0                  | 0                   | 0                   | 0                    |
| <b>seq1204</b> | Firmicutes    | Clostridia   | 0                  | 0                   | 0                   | 0                    |
| <b>seq1434</b> | Firmicutes    | Clostridia   | 0                  | 0                   | 0                   | 0                    |
| <b>seq1462</b> | Firmicutes    | Clostridia   | 0                  | 0                   | 0                   | 0                    |
| <b>seq1478</b> | Firmicutes    | Clostridia   | 0                  | 0                   | 0                   | 0                    |
| <b>seq1584</b> | Firmicutes    | Clostridia   | 0                  | 0                   | 0                   | 0                    |
| <b>seq1586</b> | Firmicutes    | Clostridia   | 0                  | 0                   | 0                   | 0                    |
| <b>seq1601</b> | Firmicutes    | Clostridia   | 0                  | 0                   | 0                   | 0                    |
| <b>seq1666</b> | Firmicutes    | Clostridia   | 0                  | 0                   | 0                   | 0                    |
| <b>seq1788</b> | Firmicutes    | Clostridia   | 0                  | 0                   | 0                   | 0                    |
| <b>seq1797</b> | Firmicutes    | Clostridia   | 0                  | 0                   | 0                   | 0                    |
| <b>seq1805</b> | Firmicutes    | Clostridia   | 0                  | 0                   | 0                   | 0                    |
| <b>seq1879</b> | Firmicutes    | Clostridia   | 0                  | 0                   | 0                   | 0                    |
| <b>seq812</b>  | Firmicutes    | Clostridia   | 0                  | 11                  | 0                   | 0                    |
| <b>seq831</b>  | Firmicutes    | Clostridia   | 64                 | 19                  | 0                   | 0                    |
| <b>seq881</b>  | Firmicutes    | Clostridia   | 0                  | 0                   | 0                   | 0                    |
| <b>seq1228</b> | Firmicutes    | Clostridia   | 47                 | 25                  | 0                   | 0                    |
| <b>seq1270</b> | Firmicutes    | Clostridia   | 0                  | 0                   | 0                   | 0                    |
| <b>seq1300</b> | Firmicutes    | Clostridia   | 0                  | 0                   | 0                   | 0                    |
| <b>seq1355</b> | Firmicutes    | Clostridia   | 0                  | 0                   | 0                   | 0                    |
| <b>seq1419</b> | Firmicutes    | Clostridia   | 0                  | 0                   | 0                   | 0                    |
| <b>seq1423</b> | Firmicutes    | Clostridia   | 0                  | 0                   | 0                   | 0                    |
| <b>seq1438</b> | Firmicutes    | Clostridia   | 0                  | 0                   | 0                   | 0                    |
| <b>seq1506</b> | Firmicutes    | Clostridia   | 0                  | 0                   | 0                   | 0                    |
| <b>seq1514</b> | Firmicutes    | Clostridia   | 27                 | 0                   | 0                   | 0                    |
| <b>seq1529</b> | Firmicutes    | Clostridia   | 0                  | 0                   | 0                   | 0                    |
| <b>seq1555</b> | Firmicutes    | Clostridia   | 6                  | 0                   | 0                   | 0                    |



Sequence Count Table

|                | <b>Phylum</b> | <b>Class</b> | <b>Subject8WK0</b> | <b>Subject8WK12</b> | <b>Subject9WK0</b> | <b>Subject9WK12</b> |
|----------------|---------------|--------------|--------------------|---------------------|--------------------|---------------------|
| <b>seq991</b>  | Firmicutes    | Clostridia   | 0                  | 0                   | 0                  | 0                   |
| <b>seq998</b>  | Firmicutes    | Clostridia   | 0                  | 0                   | 0                  | 0                   |
| <b>seq1020</b> | Firmicutes    | Clostridia   | 0                  | 0                   | 17                 | 0                   |
| <b>seq1179</b> | Firmicutes    | Clostridia   | 0                  | 0                   | 0                  | 0                   |
| <b>seq1185</b> | Firmicutes    | Clostridia   | 0                  | 0                   | 0                  | 0                   |
| <b>seq1200</b> | Firmicutes    | Clostridia   | 0                  | 0                   | 0                  | 0                   |
| <b>seq1204</b> | Firmicutes    | Clostridia   | 0                  | 0                   | 0                  | 0                   |
| <b>seq1434</b> | Firmicutes    | Clostridia   | 0                  | 0                   | 0                  | 0                   |
| <b>seq1462</b> | Firmicutes    | Clostridia   | 0                  | 0                   | 0                  | 0                   |
| <b>seq1478</b> | Firmicutes    | Clostridia   | 0                  | 0                   | 0                  | 0                   |
| <b>seq1584</b> | Firmicutes    | Clostridia   | 0                  | 0                   | 0                  | 0                   |
| <b>seq1586</b> | Firmicutes    | Clostridia   | 0                  | 0                   | 0                  | 0                   |
| <b>seq1601</b> | Firmicutes    | Clostridia   | 0                  | 0                   | 0                  | 0                   |
| <b>seq1666</b> | Firmicutes    | Clostridia   | 0                  | 0                   | 0                  | 0                   |
| <b>seq1788</b> | Firmicutes    | Clostridia   | 0                  | 0                   | 0                  | 0                   |
| <b>seq1797</b> | Firmicutes    | Clostridia   | 0                  | 0                   | 0                  | 0                   |
| <b>seq1805</b> | Firmicutes    | Clostridia   | 0                  | 0                   | 0                  | 0                   |
| <b>seq1879</b> | Firmicutes    | Clostridia   | 0                  | 0                   | 0                  | 0                   |
| <b>seq812</b>  | Firmicutes    | Clostridia   | 7                  | 0                   | 0                  | 0                   |
| <b>seq831</b>  | Firmicutes    | Clostridia   | 13                 | 0                   | 13                 | 0                   |
| <b>seq881</b>  | Firmicutes    | Clostridia   | 0                  | 0                   | 0                  | 0                   |
| <b>seq1228</b> | Firmicutes    | Clostridia   | 0                  | 0                   | 0                  | 0                   |
| <b>seq1270</b> | Firmicutes    | Clostridia   | 0                  | 0                   | 0                  | 0                   |
| <b>seq1300</b> | Firmicutes    | Clostridia   | 0                  | 0                   | 0                  | 0                   |
| <b>seq1355</b> | Firmicutes    | Clostridia   | 0                  | 0                   | 0                  | 0                   |
| <b>seq1419</b> | Firmicutes    | Clostridia   | 0                  | 0                   | 0                  | 0                   |
| <b>seq1423</b> | Firmicutes    | Clostridia   | 0                  | 0                   | 24                 | 0                   |
| <b>seq1438</b> | Firmicutes    | Clostridia   | 0                  | 0                   | 0                  | 0                   |
| <b>seq1506</b> | Firmicutes    | Clostridia   | 0                  | 0                   | 0                  | 0                   |
| <b>seq1514</b> | Firmicutes    | Clostridia   | 0                  | 0                   | 0                  | 0                   |
| <b>seq1529</b> | Firmicutes    | Clostridia   | 0                  | 0                   | 0                  | 0                   |
| <b>seq1555</b> | Firmicutes    | Clostridia   | 0                  | 0                   | 0                  | 0                   |

Sequence Count Table

|                | <b>Phylum</b> | <b>Class</b> | <b>Subject10WK0</b> | <b>Subject10WK12</b> | <b>Subject22WK0</b> | <b>Subject22WK12</b> |
|----------------|---------------|--------------|---------------------|----------------------|---------------------|----------------------|
| <b>seq991</b>  | Firmicutes    | Clostridia   | 0                   | 0                    | 87                  | 48                   |
| <b>seq998</b>  | Firmicutes    | Clostridia   | 0                   | 0                    | 0                   | 0                    |
| <b>seq1020</b> | Firmicutes    | Clostridia   | 0                   | 0                    | 47                  | 0                    |
| <b>seq1179</b> | Firmicutes    | Clostridia   | 0                   | 0                    | 0                   | 0                    |
| <b>seq1185</b> | Firmicutes    | Clostridia   | 0                   | 0                    | 40                  | 45                   |
| <b>seq1200</b> | Firmicutes    | Clostridia   | 0                   | 0                    | 0                   | 0                    |
| <b>seq1204</b> | Firmicutes    | Clostridia   | 0                   | 0                    | 24                  | 55                   |
| <b>seq1434</b> | Firmicutes    | Clostridia   | 0                   | 0                    | 0                   | 0                    |
| <b>seq1462</b> | Firmicutes    | Clostridia   | 0                   | 0                    | 0                   | 0                    |
| <b>seq1478</b> | Firmicutes    | Clostridia   | 0                   | 0                    | 0                   | 31                   |
| <b>seq1584</b> | Firmicutes    | Clostridia   | 0                   | 0                    | 21                  | 0                    |
| <b>seq1586</b> | Firmicutes    | Clostridia   | 0                   | 0                    | 0                   | 0                    |
| <b>seq1601</b> | Firmicutes    | Clostridia   | 0                   | 0                    | 0                   | 0                    |
| <b>seq1666</b> | Firmicutes    | Clostridia   | 0                   | 0                    | 0                   | 0                    |
| <b>seq1788</b> | Firmicutes    | Clostridia   | 0                   | 0                    | 0                   | 0                    |
| <b>seq1797</b> | Firmicutes    | Clostridia   | 0                   | 0                    | 0                   | 8                    |
| <b>seq1805</b> | Firmicutes    | Clostridia   | 0                   | 0                    | 0                   | 0                    |
| <b>seq1879</b> | Firmicutes    | Clostridia   | 0                   | 0                    | 0                   | 0                    |
| <b>seq812</b>  | Firmicutes    | Clostridia   | 0                   | 0                    | 0                   | 0                    |
| <b>seq831</b>  | Firmicutes    | Clostridia   | 0                   | 0                    | 12                  | 0                    |
| <b>seq881</b>  | Firmicutes    | Clostridia   | 0                   | 0                    | 26                  | 19                   |
| <b>seq1228</b> | Firmicutes    | Clostridia   | 0                   | 0                    | 0                   | 0                    |
| <b>seq1270</b> | Firmicutes    | Clostridia   | 4                   | 0                    | 0                   | 0                    |
| <b>seq1300</b> | Firmicutes    | Clostridia   | 0                   | 0                    | 0                   | 0                    |
| <b>seq1355</b> | Firmicutes    | Clostridia   | 0                   | 0                    | 0                   | 0                    |
| <b>seq1419</b> | Firmicutes    | Clostridia   | 0                   | 0                    | 0                   | 0                    |
| <b>seq1423</b> | Firmicutes    | Clostridia   | 0                   | 0                    | 0                   | 9                    |
| <b>seq1438</b> | Firmicutes    | Clostridia   | 0                   | 0                    | 0                   | 0                    |
| <b>seq1506</b> | Firmicutes    | Clostridia   | 0                   | 0                    | 0                   | 0                    |
| <b>seq1514</b> | Firmicutes    | Clostridia   | 0                   | 0                    | 0                   | 0                    |
| <b>seq1529</b> | Firmicutes    | Clostridia   | 0                   | 0                    | 0                   | 0                    |
| <b>seq1555</b> | Firmicutes    | Clostridia   | 0                   | 0                    | 0                   | 0                    |

Sequence Count Table

|                | <b>Phylum</b> | <b>Class</b> | <b>Subject23WK0</b> | <b>Subject23WK12</b> | <b>Subject24WK0</b> | <b>Subject24WK12</b> |
|----------------|---------------|--------------|---------------------|----------------------|---------------------|----------------------|
| <b>seq991</b>  | Firmicutes    | Clostridia   | 0                   | 0                    | 0                   | 0                    |
| <b>seq998</b>  | Firmicutes    | Clostridia   | 0                   | 0                    | 0                   | 0                    |
| <b>seq1020</b> | Firmicutes    | Clostridia   | 0                   | 0                    | 0                   | 0                    |
| <b>seq1179</b> | Firmicutes    | Clostridia   | 0                   | 0                    | 0                   | 0                    |
| <b>seq1185</b> | Firmicutes    | Clostridia   | 0                   | 0                    | 0                   | 0                    |
| <b>seq1200</b> | Firmicutes    | Clostridia   | 0                   | 0                    | 0                   | 0                    |
| <b>seq1204</b> | Firmicutes    | Clostridia   | 0                   | 0                    | 0                   | 0                    |
| <b>seq1434</b> | Firmicutes    | Clostridia   | 0                   | 0                    | 0                   | 0                    |
| <b>seq1462</b> | Firmicutes    | Clostridia   | 0                   | 0                    | 0                   | 0                    |
| <b>seq1478</b> | Firmicutes    | Clostridia   | 0                   | 0                    | 0                   | 0                    |
| <b>seq1584</b> | Firmicutes    | Clostridia   | 0                   | 0                    | 0                   | 0                    |
| <b>seq1586</b> | Firmicutes    | Clostridia   | 0                   | 0                    | 0                   | 0                    |
| <b>seq1601</b> | Firmicutes    | Clostridia   | 0                   | 0                    | 0                   | 0                    |
| <b>seq1666</b> | Firmicutes    | Clostridia   | 0                   | 15                   | 0                   | 0                    |
| <b>seq1788</b> | Firmicutes    | Clostridia   | 0                   | 0                    | 0                   | 0                    |
| <b>seq1797</b> | Firmicutes    | Clostridia   | 0                   | 0                    | 0                   | 0                    |
| <b>seq1805</b> | Firmicutes    | Clostridia   | 0                   | 0                    | 0                   | 0                    |
| <b>seq1879</b> | Firmicutes    | Clostridia   | 0                   | 0                    | 0                   | 0                    |
| <b>seq812</b>  | Firmicutes    | Clostridia   | 0                   | 0                    | 0                   | 0                    |
| <b>seq831</b>  | Firmicutes    | Clostridia   | 0                   | 0                    | 0                   | 7                    |
| <b>seq881</b>  | Firmicutes    | Clostridia   | 0                   | 0                    | 0                   | 0                    |
| <b>seq1228</b> | Firmicutes    | Clostridia   | 0                   | 0                    | 0                   | 0                    |
| <b>seq1270</b> | Firmicutes    | Clostridia   | 0                   | 0                    | 0                   | 0                    |
| <b>seq1300</b> | Firmicutes    | Clostridia   | 0                   | 0                    | 0                   | 0                    |
| <b>seq1355</b> | Firmicutes    | Clostridia   | 0                   | 3                    | 0                   | 0                    |
| <b>seq1419</b> | Firmicutes    | Clostridia   | 0                   | 0                    | 0                   | 0                    |
| <b>seq1423</b> | Firmicutes    | Clostridia   | 0                   | 0                    | 0                   | 0                    |
| <b>seq1438</b> | Firmicutes    | Clostridia   | 0                   | 0                    | 0                   | 0                    |
| <b>seq1506</b> | Firmicutes    | Clostridia   | 0                   | 0                    | 0                   | 0                    |
| <b>seq1514</b> | Firmicutes    | Clostridia   | 0                   | 0                    | 0                   | 0                    |
| <b>seq1529</b> | Firmicutes    | Clostridia   | 0                   | 0                    | 8                   | 0                    |
| <b>seq1555</b> | Firmicutes    | Clostridia   | 0                   | 0                    | 0                   | 0                    |

Sequence Count Table

|                | <b>Phylum</b> | <b>Class</b> | <b>Subject11WK0</b> | <b>Subject11WK12</b> | <b>Subject12WK0</b> | <b>Subject12WK12</b> |
|----------------|---------------|--------------|---------------------|----------------------|---------------------|----------------------|
| <b>seq991</b>  | Firmicutes    | Clostridia   | 0                   | 0                    | 0                   | 0                    |
| <b>seq998</b>  | Firmicutes    | Clostridia   | 0                   | 0                    | 0                   | 0                    |
| <b>seq1020</b> | Firmicutes    | Clostridia   | 0                   | 0                    | 0                   | 0                    |
| <b>seq1179</b> | Firmicutes    | Clostridia   | 0                   | 0                    | 0                   | 0                    |
| <b>seq1185</b> | Firmicutes    | Clostridia   | 0                   | 0                    | 0                   | 0                    |
| <b>seq1200</b> | Firmicutes    | Clostridia   | 0                   | 0                    | 0                   | 0                    |
| <b>seq1204</b> | Firmicutes    | Clostridia   | 0                   | 0                    | 0                   | 0                    |
| <b>seq1434</b> | Firmicutes    | Clostridia   | 0                   | 0                    | 0                   | 0                    |
| <b>seq1462</b> | Firmicutes    | Clostridia   | 0                   | 0                    | 0                   | 0                    |
| <b>seq1478</b> | Firmicutes    | Clostridia   | 0                   | 0                    | 0                   | 0                    |
| <b>seq1584</b> | Firmicutes    | Clostridia   | 0                   | 0                    | 0                   | 0                    |
| <b>seq1586</b> | Firmicutes    | Clostridia   | 0                   | 0                    | 21                  | 0                    |
| <b>seq1601</b> | Firmicutes    | Clostridia   | 0                   | 0                    | 0                   | 0                    |
| <b>seq1666</b> | Firmicutes    | Clostridia   | 0                   | 0                    | 0                   | 0                    |
| <b>seq1788</b> | Firmicutes    | Clostridia   | 0                   | 0                    | 0                   | 0                    |
| <b>seq1797</b> | Firmicutes    | Clostridia   | 0                   | 0                    | 0                   | 0                    |
| <b>seq1805</b> | Firmicutes    | Clostridia   | 0                   | 0                    | 0                   | 0                    |
| <b>seq1879</b> | Firmicutes    | Clostridia   | 0                   | 0                    | 0                   | 0                    |
| <b>seq812</b>  | Firmicutes    | Clostridia   | 0                   | 0                    | 0                   | 0                    |
| <b>seq831</b>  | Firmicutes    | Clostridia   | 0                   | 0                    | 0                   | 8                    |
| <b>seq881</b>  | Firmicutes    | Clostridia   | 0                   | 0                    | 22                  | 45                   |
| <b>seq1228</b> | Firmicutes    | Clostridia   | 0                   | 0                    | 0                   | 0                    |
| <b>seq1270</b> | Firmicutes    | Clostridia   | 0                   | 0                    | 0                   | 0                    |
| <b>seq1300</b> | Firmicutes    | Clostridia   | 0                   | 0                    | 0                   | 0                    |
| <b>seq1355</b> | Firmicutes    | Clostridia   | 0                   | 0                    | 0                   | 0                    |
| <b>seq1419</b> | Firmicutes    | Clostridia   | 0                   | 0                    | 0                   | 0                    |
| <b>seq1423</b> | Firmicutes    | Clostridia   | 0                   | 0                    | 0                   | 0                    |
| <b>seq1438</b> | Firmicutes    | Clostridia   | 0                   | 0                    | 0                   | 0                    |
| <b>seq1506</b> | Firmicutes    | Clostridia   | 0                   | 0                    | 0                   | 0                    |
| <b>seq1514</b> | Firmicutes    | Clostridia   | 0                   | 0                    | 0                   | 0                    |
| <b>seq1529</b> | Firmicutes    | Clostridia   | 0                   | 0                    | 0                   | 0                    |
| <b>seq1555</b> | Firmicutes    | Clostridia   | 0                   | 0                    | 0                   | 0                    |

Sequence Count Table

|                | <b>Phylum</b> | <b>Class</b> | <b>Subject25WK0</b> | <b>Subject25WK12</b> | <b>Subject38WK0</b> | <b>Subject38WK12</b> |
|----------------|---------------|--------------|---------------------|----------------------|---------------------|----------------------|
| <b>seq991</b>  | Firmicutes    | Clostridia   | 0                   | 0                    | 0                   | 0                    |
| <b>seq998</b>  | Firmicutes    | Clostridia   | 0                   | 0                    | 0                   | 0                    |
| <b>seq1020</b> | Firmicutes    | Clostridia   | 0                   | 0                    | 0                   | 0                    |
| <b>seq1179</b> | Firmicutes    | Clostridia   | 0                   | 0                    | 0                   | 0                    |
| <b>seq1185</b> | Firmicutes    | Clostridia   | 0                   | 0                    | 0                   | 0                    |
| <b>seq1200</b> | Firmicutes    | Clostridia   | 0                   | 0                    | 0                   | 0                    |
| <b>seq1204</b> | Firmicutes    | Clostridia   | 0                   | 0                    | 0                   | 0                    |
| <b>seq1434</b> | Firmicutes    | Clostridia   | 0                   | 0                    | 0                   | 0                    |
| <b>seq1462</b> | Firmicutes    | Clostridia   | 0                   | 0                    | 0                   | 0                    |
| <b>seq1478</b> | Firmicutes    | Clostridia   | 0                   | 0                    | 0                   | 0                    |
| <b>seq1584</b> | Firmicutes    | Clostridia   | 0                   | 0                    | 0                   | 0                    |
| <b>seq1586</b> | Firmicutes    | Clostridia   | 0                   | 0                    | 0                   | 0                    |
| <b>seq1601</b> | Firmicutes    | Clostridia   | 0                   | 0                    | 0                   | 0                    |
| <b>seq1666</b> | Firmicutes    | Clostridia   | 0                   | 0                    | 0                   | 0                    |
| <b>seq1788</b> | Firmicutes    | Clostridia   | 0                   | 0                    | 0                   | 0                    |
| <b>seq1797</b> | Firmicutes    | Clostridia   | 0                   | 0                    | 0                   | 0                    |
| <b>seq1805</b> | Firmicutes    | Clostridia   | 0                   | 0                    | 0                   | 0                    |
| <b>seq1879</b> | Firmicutes    | Clostridia   | 0                   | 0                    | 0                   | 0                    |
| <b>seq812</b>  | Firmicutes    | Clostridia   | 22                  | 0                    | 0                   | 0                    |
| <b>seq831</b>  | Firmicutes    | Clostridia   | 34                  | 14                   | 0                   | 0                    |
| <b>seq881</b>  | Firmicutes    | Clostridia   | 0                   | 0                    | 0                   | 0                    |
| <b>seq1228</b> | Firmicutes    | Clostridia   | 0                   | 0                    | 0                   | 0                    |
| <b>seq1270</b> | Firmicutes    | Clostridia   | 0                   | 0                    | 0                   | 0                    |
| <b>seq1300</b> | Firmicutes    | Clostridia   | 0                   | 0                    | 0                   | 0                    |
| <b>seq1355</b> | Firmicutes    | Clostridia   | 0                   | 0                    | 0                   | 0                    |
| <b>seq1419</b> | Firmicutes    | Clostridia   | 0                   | 0                    | 0                   | 0                    |
| <b>seq1423</b> | Firmicutes    | Clostridia   | 0                   | 0                    | 0                   | 0                    |
| <b>seq1438</b> | Firmicutes    | Clostridia   | 0                   | 0                    | 0                   | 0                    |
| <b>seq1506</b> | Firmicutes    | Clostridia   | 28                  | 0                    | 0                   | 0                    |
| <b>seq1514</b> | Firmicutes    | Clostridia   | 0                   | 0                    | 0                   | 0                    |
| <b>seq1529</b> | Firmicutes    | Clostridia   | 0                   | 0                    | 0                   | 0                    |
| <b>seq1555</b> | Firmicutes    | Clostridia   | 17                  | 0                    | 0                   | 0                    |

Sequence Count Table

|                | <b>Phylum</b> | <b>Class</b> | <b>Subject31WK0</b> | <b>Subject31WK12</b> | <b>Subject32WK0</b> | <b>Subject32WK12</b> |
|----------------|---------------|--------------|---------------------|----------------------|---------------------|----------------------|
| <b>seq991</b>  | Firmicutes    | Clostridia   | 0                   | 0                    | 0                   | 0                    |
| <b>seq998</b>  | Firmicutes    | Clostridia   | 0                   | 0                    | 0                   | 0                    |
| <b>seq1020</b> | Firmicutes    | Clostridia   | 0                   | 0                    | 0                   | 0                    |
| <b>seq1179</b> | Firmicutes    | Clostridia   | 0                   | 0                    | 0                   | 0                    |
| <b>seq1185</b> | Firmicutes    | Clostridia   | 0                   | 0                    | 0                   | 0                    |
| <b>seq1200</b> | Firmicutes    | Clostridia   | 0                   | 0                    | 0                   | 0                    |
| <b>seq1204</b> | Firmicutes    | Clostridia   | 0                   | 0                    | 0                   | 0                    |
| <b>seq1434</b> | Firmicutes    | Clostridia   | 0                   | 0                    | 0                   | 0                    |
| <b>seq1462</b> | Firmicutes    | Clostridia   | 0                   | 0                    | 0                   | 0                    |
| <b>seq1478</b> | Firmicutes    | Clostridia   | 0                   | 0                    | 0                   | 0                    |
| <b>seq1584</b> | Firmicutes    | Clostridia   | 0                   | 0                    | 0                   | 0                    |
| <b>seq1586</b> | Firmicutes    | Clostridia   | 0                   | 0                    | 0                   | 0                    |
| <b>seq1601</b> | Firmicutes    | Clostridia   | 0                   | 0                    | 0                   | 0                    |
| <b>seq1666</b> | Firmicutes    | Clostridia   | 0                   | 0                    | 0                   | 0                    |
| <b>seq1788</b> | Firmicutes    | Clostridia   | 0                   | 0                    | 0                   | 0                    |
| <b>seq1797</b> | Firmicutes    | Clostridia   | 0                   | 0                    | 0                   | 0                    |
| <b>seq1805</b> | Firmicutes    | Clostridia   | 0                   | 0                    | 0                   | 0                    |
| <b>seq1879</b> | Firmicutes    | Clostridia   | 0                   | 0                    | 0                   | 0                    |
| <b>seq812</b>  | Firmicutes    | Clostridia   | 0                   | 0                    | 7                   | 0                    |
| <b>seq831</b>  | Firmicutes    | Clostridia   | 0                   | 0                    | 0                   | 0                    |
| <b>seq881</b>  | Firmicutes    | Clostridia   | 0                   | 0                    | 0                   | 0                    |
| <b>seq1228</b> | Firmicutes    | Clostridia   | 0                   | 0                    | 0                   | 0                    |
| <b>seq1270</b> | Firmicutes    | Clostridia   | 0                   | 0                    | 0                   | 0                    |
| <b>seq1300</b> | Firmicutes    | Clostridia   | 0                   | 0                    | 0                   | 0                    |
| <b>seq1355</b> | Firmicutes    | Clostridia   | 0                   | 0                    | 0                   | 0                    |
| <b>seq1419</b> | Firmicutes    | Clostridia   | 0                   | 0                    | 0                   | 0                    |
| <b>seq1423</b> | Firmicutes    | Clostridia   | 0                   | 0                    | 0                   | 0                    |
| <b>seq1438</b> | Firmicutes    | Clostridia   | 0                   | 0                    | 0                   | 0                    |
| <b>seq1506</b> | Firmicutes    | Clostridia   | 0                   | 0                    | 0                   | 0                    |
| <b>seq1514</b> | Firmicutes    | Clostridia   | 0                   | 0                    | 0                   | 0                    |
| <b>seq1529</b> | Firmicutes    | Clostridia   | 0                   | 0                    | 0                   | 0                    |
| <b>seq1555</b> | Firmicutes    | Clostridia   | 0                   | 0                    | 0                   | 0                    |

Sequence Count Table

|                | <b>Phylum</b> | <b>Class</b> | <b>Subject13WK0</b> | <b>Subject13WK12</b> | <b>Subject39WK0</b> | <b>Subject39WK12</b> |
|----------------|---------------|--------------|---------------------|----------------------|---------------------|----------------------|
| <b>seq991</b>  | Firmicutes    | Clostridia   | 0                   | 0                    | 0                   | 0                    |
| <b>seq998</b>  | Firmicutes    | Clostridia   | 0                   | 0                    | 0                   | 0                    |
| <b>seq1020</b> | Firmicutes    | Clostridia   | 0                   | 0                    | 0                   | 0                    |
| <b>seq1179</b> | Firmicutes    | Clostridia   | 0                   | 0                    | 0                   | 0                    |
| <b>seq1185</b> | Firmicutes    | Clostridia   | 0                   | 0                    | 0                   | 0                    |
| <b>seq1200</b> | Firmicutes    | Clostridia   | 0                   | 0                    | 0                   | 0                    |
| <b>seq1204</b> | Firmicutes    | Clostridia   | 0                   | 0                    | 0                   | 0                    |
| <b>seq1434</b> | Firmicutes    | Clostridia   | 37                  | 0                    | 0                   | 0                    |
| <b>seq1462</b> | Firmicutes    | Clostridia   | 33                  | 0                    | 0                   | 0                    |
| <b>seq1478</b> | Firmicutes    | Clostridia   | 0                   | 0                    | 0                   | 0                    |
| <b>seq1584</b> | Firmicutes    | Clostridia   | 0                   | 0                    | 0                   | 0                    |
| <b>seq1586</b> | Firmicutes    | Clostridia   | 0                   | 0                    | 0                   | 0                    |
| <b>seq1601</b> | Firmicutes    | Clostridia   | 0                   | 0                    | 0                   | 0                    |
| <b>seq1666</b> | Firmicutes    | Clostridia   | 0                   | 0                    | 0                   | 0                    |
| <b>seq1788</b> | Firmicutes    | Clostridia   | 0                   | 0                    | 0                   | 0                    |
| <b>seq1797</b> | Firmicutes    | Clostridia   | 0                   | 0                    | 0                   | 0                    |
| <b>seq1805</b> | Firmicutes    | Clostridia   | 0                   | 0                    | 0                   | 0                    |
| <b>seq1879</b> | Firmicutes    | Clostridia   | 0                   | 0                    | 0                   | 0                    |
| <b>seq812</b>  | Firmicutes    | Clostridia   | 0                   | 0                    | 0                   | 0                    |
| <b>seq831</b>  | Firmicutes    | Clostridia   | 0                   | 0                    | 0                   | 0                    |
| <b>seq881</b>  | Firmicutes    | Clostridia   | 0                   | 0                    | 0                   | 0                    |
| <b>seq1228</b> | Firmicutes    | Clostridia   | 0                   | 0                    | 0                   | 0                    |
| <b>seq1270</b> | Firmicutes    | Clostridia   | 0                   | 0                    | 0                   | 0                    |
| <b>seq1300</b> | Firmicutes    | Clostridia   | 0                   | 0                    | 0                   | 0                    |
| <b>seq1355</b> | Firmicutes    | Clostridia   | 0                   | 0                    | 0                   | 0                    |
| <b>seq1419</b> | Firmicutes    | Clostridia   | 0                   | 0                    | 0                   | 0                    |
| <b>seq1423</b> | Firmicutes    | Clostridia   | 0                   | 0                    | 0                   | 0                    |
| <b>seq1438</b> | Firmicutes    | Clostridia   | 0                   | 0                    | 0                   | 0                    |
| <b>seq1506</b> | Firmicutes    | Clostridia   | 0                   | 0                    | 0                   | 0                    |
| <b>seq1514</b> | Firmicutes    | Clostridia   | 0                   | 0                    | 0                   | 0                    |
| <b>seq1529</b> | Firmicutes    | Clostridia   | 8                   | 10                   | 0                   | 0                    |
| <b>seq1555</b> | Firmicutes    | Clostridia   | 0                   | 0                    | 0                   | 0                    |

Sequence Count Table

|                | <b>Phylum</b> | <b>Class</b> | <b>Subject26WK0</b> | <b>Subject26WK12</b> | <b>Subject14WK0</b> | <b>Subject14WK12</b> |
|----------------|---------------|--------------|---------------------|----------------------|---------------------|----------------------|
| <b>seq991</b>  | Firmicutes    | Clostridia   | 0                   | 0                    | 0                   | 0                    |
| <b>seq998</b>  | Firmicutes    | Clostridia   | 0                   | 0                    | 0                   | 0                    |
| <b>seq1020</b> | Firmicutes    | Clostridia   | 0                   | 0                    | 0                   | 0                    |
| <b>seq1179</b> | Firmicutes    | Clostridia   | 0                   | 0                    | 0                   | 0                    |
| <b>seq1185</b> | Firmicutes    | Clostridia   | 0                   | 0                    | 0                   | 0                    |
| <b>seq1200</b> | Firmicutes    | Clostridia   | 0                   | 0                    | 0                   | 0                    |
| <b>seq1204</b> | Firmicutes    | Clostridia   | 0                   | 0                    | 0                   | 0                    |
| <b>seq1434</b> | Firmicutes    | Clostridia   | 0                   | 0                    | 0                   | 0                    |
| <b>seq1462</b> | Firmicutes    | Clostridia   | 0                   | 0                    | 0                   | 0                    |
| <b>seq1478</b> | Firmicutes    | Clostridia   | 0                   | 0                    | 0                   | 0                    |
| <b>seq1584</b> | Firmicutes    | Clostridia   | 0                   | 0                    | 0                   | 0                    |
| <b>seq1586</b> | Firmicutes    | Clostridia   | 0                   | 0                    | 0                   | 0                    |
| <b>seq1601</b> | Firmicutes    | Clostridia   | 0                   | 0                    | 0                   | 0                    |
| <b>seq1666</b> | Firmicutes    | Clostridia   | 0                   | 0                    | 0                   | 0                    |
| <b>seq1788</b> | Firmicutes    | Clostridia   | 0                   | 0                    | 0                   | 0                    |
| <b>seq1797</b> | Firmicutes    | Clostridia   | 0                   | 0                    | 0                   | 0                    |
| <b>seq1805</b> | Firmicutes    | Clostridia   | 0                   | 0                    | 0                   | 0                    |
| <b>seq1879</b> | Firmicutes    | Clostridia   | 0                   | 0                    | 0                   | 0                    |
| <b>seq812</b>  | Firmicutes    | Clostridia   | 0                   | 55                   | 0                   | 0                    |
| <b>seq831</b>  | Firmicutes    | Clostridia   | 0                   | 0                    | 0                   | 15                   |
| <b>seq881</b>  | Firmicutes    | Clostridia   | 0                   | 0                    | 6                   | 16                   |
| <b>seq1228</b> | Firmicutes    | Clostridia   | 0                   | 0                    | 0                   | 0                    |
| <b>seq1270</b> | Firmicutes    | Clostridia   | 0                   | 0                    | 0                   | 0                    |
| <b>seq1300</b> | Firmicutes    | Clostridia   | 15                  | 0                    | 0                   | 3                    |
| <b>seq1355</b> | Firmicutes    | Clostridia   | 0                   | 0                    | 0                   | 0                    |
| <b>seq1419</b> | Firmicutes    | Clostridia   | 0                   | 0                    | 0                   | 0                    |
| <b>seq1423</b> | Firmicutes    | Clostridia   | 0                   | 0                    | 0                   | 0                    |
| <b>seq1438</b> | Firmicutes    | Clostridia   | 0                   | 0                    | 0                   | 0                    |
| <b>seq1506</b> | Firmicutes    | Clostridia   | 0                   | 0                    | 0                   | 0                    |
| <b>seq1514</b> | Firmicutes    | Clostridia   | 0                   | 0                    | 0                   | 0                    |
| <b>seq1529</b> | Firmicutes    | Clostridia   | 0                   | 0                    | 0                   | 0                    |
| <b>seq1555</b> | Firmicutes    | Clostridia   | 0                   | 0                    | 0                   | 0                    |



Sequence Count Table

|                | <b>Phylum</b> | <b>Class</b> | <b>Subject27WK0</b> | <b>Subject27WK12</b> | <b>Subject15WK0</b> | <b>Subject15WK12</b> |
|----------------|---------------|--------------|---------------------|----------------------|---------------------|----------------------|
| <b>seq991</b>  | Firmicutes    | Clostridia   | 0                   | 0                    | 0                   | 0                    |
| <b>seq998</b>  | Firmicutes    | Clostridia   | 0                   | 0                    | 0                   | 0                    |
| <b>seq1020</b> | Firmicutes    | Clostridia   | 0                   | 0                    | 0                   | 0                    |
| <b>seq1179</b> | Firmicutes    | Clostridia   | 0                   | 0                    | 0                   | 0                    |
| <b>seq1185</b> | Firmicutes    | Clostridia   | 0                   | 0                    | 0                   | 0                    |
| <b>seq1200</b> | Firmicutes    | Clostridia   | 10                  | 70                   | 0                   | 0                    |
| <b>seq1204</b> | Firmicutes    | Clostridia   | 0                   | 0                    | 0                   | 0                    |
| <b>seq1434</b> | Firmicutes    | Clostridia   | 0                   | 0                    | 0                   | 0                    |
| <b>seq1462</b> | Firmicutes    | Clostridia   | 0                   | 0                    | 0                   | 0                    |
| <b>seq1478</b> | Firmicutes    | Clostridia   | 0                   | 0                    | 0                   | 0                    |
| <b>seq1584</b> | Firmicutes    | Clostridia   | 0                   | 0                    | 0                   | 0                    |
| <b>seq1586</b> | Firmicutes    | Clostridia   | 0                   | 0                    | 0                   | 0                    |
| <b>seq1601</b> | Firmicutes    | Clostridia   | 0                   | 0                    | 0                   | 0                    |
| <b>seq1666</b> | Firmicutes    | Clostridia   | 0                   | 0                    | 0                   | 0                    |
| <b>seq1788</b> | Firmicutes    | Clostridia   | 0                   | 0                    | 0                   | 0                    |
| <b>seq1797</b> | Firmicutes    | Clostridia   | 0                   | 0                    | 0                   | 0                    |
| <b>seq1805</b> | Firmicutes    | Clostridia   | 0                   | 0                    | 0                   | 0                    |
| <b>seq1879</b> | Firmicutes    | Clostridia   | 0                   | 0                    | 0                   | 0                    |
| <b>seq812</b>  | Firmicutes    | Clostridia   | 0                   | 0                    | 0                   | 0                    |
| <b>seq831</b>  | Firmicutes    | Clostridia   | 0                   | 0                    | 0                   | 0                    |
| <b>seq881</b>  | Firmicutes    | Clostridia   | 0                   | 0                    | 0                   | 0                    |
| <b>seq1228</b> | Firmicutes    | Clostridia   | 0                   | 0                    | 0                   | 0                    |
| <b>seq1270</b> | Firmicutes    | Clostridia   | 0                   | 0                    | 0                   | 0                    |
| <b>seq1300</b> | Firmicutes    | Clostridia   | 0                   | 0                    | 0                   | 0                    |
| <b>seq1355</b> | Firmicutes    | Clostridia   | 0                   | 0                    | 0                   | 0                    |
| <b>seq1419</b> | Firmicutes    | Clostridia   | 0                   | 0                    | 0                   | 0                    |
| <b>seq1423</b> | Firmicutes    | Clostridia   | 0                   | 0                    | 0                   | 0                    |
| <b>seq1438</b> | Firmicutes    | Clostridia   | 0                   | 0                    | 0                   | 0                    |
| <b>seq1506</b> | Firmicutes    | Clostridia   | 0                   | 0                    | 0                   | 0                    |
| <b>seq1514</b> | Firmicutes    | Clostridia   | 0                   | 0                    | 0                   | 0                    |
| <b>seq1529</b> | Firmicutes    | Clostridia   | 0                   | 0                    | 0                   | 0                    |
| <b>seq1555</b> | Firmicutes    | Clostridia   | 0                   | 0                    | 0                   | 0                    |

Sequence Count Table

|                | <b>Phylum</b> | <b>Class</b> | <b>Δ</b> |  |  |  |
|----------------|---------------|--------------|----------|--|--|--|
| <b>seq991</b>  | Firmicutes    | Clostridia   |          |  |  |  |
| <b>seq998</b>  | Firmicutes    | Clostridia   |          |  |  |  |
| <b>seq1020</b> | Firmicutes    | Clostridia   |          |  |  |  |
| <b>seq1179</b> | Firmicutes    | Clostridia   |          |  |  |  |
| <b>seq1185</b> | Firmicutes    | Clostridia   |          |  |  |  |
| <b>seq1200</b> | Firmicutes    | Clostridia   |          |  |  |  |
| <b>seq1204</b> | Firmicutes    | Clostridia   |          |  |  |  |
| <b>seq1434</b> | Firmicutes    | Clostridia   |          |  |  |  |
| <b>seq1462</b> | Firmicutes    | Clostridia   |          |  |  |  |
| <b>seq1478</b> | Firmicutes    | Clostridia   |          |  |  |  |
| <b>seq1584</b> | Firmicutes    | Clostridia   |          |  |  |  |
| <b>seq1586</b> | Firmicutes    | Clostridia   |          |  |  |  |
| <b>seq1601</b> | Firmicutes    | Clostridia   |          |  |  |  |
| <b>seq1666</b> | Firmicutes    | Clostridia   |          |  |  |  |
| <b>seq1788</b> | Firmicutes    | Clostridia   |          |  |  |  |
| <b>seq1797</b> | Firmicutes    | Clostridia   |          |  |  |  |
| <b>seq1805</b> | Firmicutes    | Clostridia   |          |  |  |  |
| <b>seq1879</b> | Firmicutes    | Clostridia   |          |  |  |  |
| <b>seq812</b>  | Firmicutes    | Clostridia   |          |  |  |  |
| <b>seq831</b>  | Firmicutes    | Clostridia   |          |  |  |  |
| <b>seq881</b>  | Firmicutes    | Clostridia   |          |  |  |  |
| <b>seq1228</b> | Firmicutes    | Clostridia   |          |  |  |  |
| <b>seq1270</b> | Firmicutes    | Clostridia   |          |  |  |  |
| <b>seq1300</b> | Firmicutes    | Clostridia   |          |  |  |  |
| <b>seq1355</b> | Firmicutes    | Clostridia   |          |  |  |  |
| <b>seq1419</b> | Firmicutes    | Clostridia   |          |  |  |  |
| <b>seq1423</b> | Firmicutes    | Clostridia   |          |  |  |  |
| <b>seq1438</b> | Firmicutes    | Clostridia   |          |  |  |  |
| <b>seq1506</b> | Firmicutes    | Clostridia   |          |  |  |  |
| <b>seq1514</b> | Firmicutes    | Clostridia   |          |  |  |  |
| <b>seq1529</b> | Firmicutes    | Clostridia   |          |  |  |  |
| <b>seq1555</b> | Firmicutes    | Clostridia   |          |  |  |  |

Sequence Count Table

|                | <b>Phylum</b> | <b>Class</b> | <b>Order</b>  | <b>Family</b>                 |
|----------------|---------------|--------------|---------------|-------------------------------|
| <b>seq1588</b> | Firmicutes    | Clostridia   | Clostridiales | Christensenellaceae           |
| <b>seq1701</b> | Firmicutes    | Clostridia   | Clostridiales | Christensenellaceae           |
| <b>seq1702</b> | Firmicutes    | Clostridia   | Clostridiales | Christensenellaceae           |
| <b>seq1877</b> | Firmicutes    | Clostridia   | Clostridiales | Christensenellaceae           |
| <b>seq1806</b> | Firmicutes    | Clostridia   | Clostridiales | Clostridiaceae_1              |
| <b>seq142</b>  | Firmicutes    | Clostridia   | Clostridiales | Clostridiaceae_1              |
| <b>seq327</b>  | Firmicutes    | Clostridia   | Clostridiales | Clostridiaceae_1              |
| <b>seq710</b>  | Firmicutes    | Clostridia   | Clostridiales | Clostridiaceae_1              |
| <b>seq721</b>  | Firmicutes    | Clostridia   | Clostridiales | Clostridiaceae_1              |
| <b>seq839</b>  | Firmicutes    | Clostridia   | Clostridiales | Clostridiaceae_1              |
| <b>seq842</b>  | Firmicutes    | Clostridia   | Clostridiales | Clostridiaceae_1              |
| <b>seq866</b>  | Firmicutes    | Clostridia   | Clostridiales | Clostridiaceae_1              |
| <b>seq924</b>  | Firmicutes    | Clostridia   | Clostridiales | Clostridiaceae_1              |
| <b>seq1018</b> | Firmicutes    | Clostridia   | Clostridiales | Clostridiaceae_1              |
| <b>seq1063</b> | Firmicutes    | Clostridia   | Clostridiales | Clostridiaceae_1              |
| <b>seq1260</b> | Firmicutes    | Clostridia   | Clostridiales | Clostridiaceae_1              |
| <b>seq1874</b> | Firmicutes    | Clostridia   | Clostridiales | Clostridiaceae_1              |
| <b>seq1155</b> | Firmicutes    | Clostridia   | Clostridiales | Clostridiaceae_1              |
| <b>seq159</b>  | Firmicutes    | Clostridia   | Clostridiales | Clostridiales_vadinBB60_group |
| <b>seq301</b>  | Firmicutes    | Clostridia   | Clostridiales | Clostridiales_vadinBB60_group |
| <b>seq599</b>  | Firmicutes    | Clostridia   | Clostridiales | Clostridiales_vadinBB60_group |
| <b>seq679</b>  | Firmicutes    | Clostridia   | Clostridiales | Clostridiales_vadinBB60_group |
| <b>seq692</b>  | Firmicutes    | Clostridia   | Clostridiales | Clostridiales_vadinBB60_group |
| <b>seq748</b>  | Firmicutes    | Clostridia   | Clostridiales | Clostridiales_vadinBB60_group |
| <b>seq777</b>  | Firmicutes    | Clostridia   | Clostridiales | Clostridiales_vadinBB60_group |
| <b>seq972</b>  | Firmicutes    | Clostridia   | Clostridiales | Clostridiales_vadinBB60_group |
| <b>seq1008</b> | Firmicutes    | Clostridia   | Clostridiales | Clostridiales_vadinBB60_group |
| <b>seq1045</b> | Firmicutes    | Clostridia   | Clostridiales | Clostridiales_vadinBB60_group |
| <b>seq1083</b> | Firmicutes    | Clostridia   | Clostridiales | Clostridiales_vadinBB60_group |
| <b>seq1106</b> | Firmicutes    | Clostridia   | Clostridiales | Clostridiales_vadinBB60_group |
| <b>seq1237</b> | Firmicutes    | Clostridia   | Clostridiales | Clostridiales_vadinBB60_group |
| <b>seq1312</b> | Firmicutes    | Clostridia   | Clostridiales | Clostridiales_vadinBB60_group |

Sequence Count Table

|                | <b>Phylum</b> | <b>Class</b> | <b>Genus</b>                | <b>Species</b> |
|----------------|---------------|--------------|-----------------------------|----------------|
| <b>seq1588</b> | Firmicutes    | Clostridia   |                             |                |
| <b>seq1701</b> | Firmicutes    | Clostridia   |                             |                |
| <b>seq1702</b> | Firmicutes    | Clostridia   |                             |                |
| <b>seq1877</b> | Firmicutes    | Clostridia   |                             |                |
| <b>seq1806</b> | Firmicutes    | Clostridia   | Candidatus_Arthromitus      |                |
| <b>seq142</b>  | Firmicutes    | Clostridia   | Clostridium_sensu_stricto_1 |                |
| <b>seq327</b>  | Firmicutes    | Clostridia   | Clostridium_sensu_stricto_1 |                |
| <b>seq710</b>  | Firmicutes    | Clostridia   | Clostridium_sensu_stricto_1 |                |
| <b>seq721</b>  | Firmicutes    | Clostridia   | Clostridium_sensu_stricto_1 | disporicum     |
| <b>seq839</b>  | Firmicutes    | Clostridia   | Clostridium_sensu_stricto_1 |                |
| <b>seq842</b>  | Firmicutes    | Clostridia   | Clostridium_sensu_stricto_1 |                |
| <b>seq866</b>  | Firmicutes    | Clostridia   | Clostridium_sensu_stricto_1 | paraputrificum |
| <b>seq924</b>  | Firmicutes    | Clostridia   | Clostridium_sensu_stricto_1 |                |
| <b>seq1018</b> | Firmicutes    | Clostridia   | Clostridium_sensu_stricto_1 |                |
| <b>seq1063</b> | Firmicutes    | Clostridia   | Clostridium_sensu_stricto_1 |                |
| <b>seq1260</b> | Firmicutes    | Clostridia   | Clostridium_sensu_stricto_1 |                |
| <b>seq1874</b> | Firmicutes    | Clostridia   | Clostridium_sensu_stricto_1 |                |
| <b>seq1155</b> | Firmicutes    | Clostridia   | Sarcina                     | ventriculi     |
| <b>seq159</b>  | Firmicutes    | Clostridia   |                             |                |
| <b>seq301</b>  | Firmicutes    | Clostridia   |                             |                |
| <b>seq599</b>  | Firmicutes    | Clostridia   |                             |                |
| <b>seq679</b>  | Firmicutes    | Clostridia   |                             |                |
| <b>seq692</b>  | Firmicutes    | Clostridia   |                             |                |
| <b>seq748</b>  | Firmicutes    | Clostridia   |                             |                |
| <b>seq777</b>  | Firmicutes    | Clostridia   |                             |                |
| <b>seq972</b>  | Firmicutes    | Clostridia   |                             |                |
| <b>seq1008</b> | Firmicutes    | Clostridia   |                             |                |
| <b>seq1045</b> | Firmicutes    | Clostridia   |                             |                |
| <b>seq1083</b> | Firmicutes    | Clostridia   |                             |                |
| <b>seq1106</b> | Firmicutes    | Clostridia   |                             |                |
| <b>seq1237</b> | Firmicutes    | Clostridia   |                             |                |
| <b>seq1312</b> | Firmicutes    | Clostridia   |                             |                |

Sequence Count Table

|                | <b>Phylum</b> | <b>Class</b> | <b>Subject34WK0</b> | <b>Subject34WK12</b> | <b>Subject16WK0</b> | <b>Subject16WK12</b> |
|----------------|---------------|--------------|---------------------|----------------------|---------------------|----------------------|
| <b>seq1588</b> | Firmicutes    | Clostridia   | 0                   | 0                    | 0                   | 0                    |
| <b>seq1701</b> | Firmicutes    | Clostridia   | 0                   | 0                    | 0                   | 0                    |
| <b>seq1702</b> | Firmicutes    | Clostridia   | 0                   | 0                    | 0                   | 0                    |
| <b>seq1877</b> | Firmicutes    | Clostridia   | 0                   | 0                    | 0                   | 0                    |
| <b>seq1806</b> | Firmicutes    | Clostridia   | 0                   | 0                    | 0                   | 0                    |
| <b>seq142</b>  | Firmicutes    | Clostridia   | 15                  | 17                   | 369                 | 0                    |
| <b>seq327</b>  | Firmicutes    | Clostridia   | 0                   | 0                    | 31                  | 0                    |
| <b>seq710</b>  | Firmicutes    | Clostridia   | 0                   | 0                    | 0                   | 0                    |
| <b>seq721</b>  | Firmicutes    | Clostridia   | 0                   | 0                    | 0                   | 0                    |
| <b>seq839</b>  | Firmicutes    | Clostridia   | 0                   | 0                    | 0                   | 0                    |
| <b>seq842</b>  | Firmicutes    | Clostridia   | 0                   | 0                    | 0                   | 0                    |
| <b>seq866</b>  | Firmicutes    | Clostridia   | 0                   | 0                    | 0                   | 0                    |
| <b>seq924</b>  | Firmicutes    | Clostridia   | 0                   | 0                    | 0                   | 0                    |
| <b>seq1018</b> | Firmicutes    | Clostridia   | 0                   | 0                    | 0                   | 0                    |
| <b>seq1063</b> | Firmicutes    | Clostridia   | 0                   | 46                   | 7                   | 0                    |
| <b>seq1260</b> | Firmicutes    | Clostridia   | 0                   | 0                    | 0                   | 0                    |
| <b>seq1874</b> | Firmicutes    | Clostridia   | 0                   | 0                    | 0                   | 0                    |
| <b>seq1155</b> | Firmicutes    | Clostridia   | 0                   | 0                    | 0                   | 0                    |
| <b>seq159</b>  | Firmicutes    | Clostridia   | 0                   | 0                    | 0                   | 0                    |
| <b>seq301</b>  | Firmicutes    | Clostridia   | 0                   | 0                    | 0                   | 0                    |
| <b>seq599</b>  | Firmicutes    | Clostridia   | 0                   | 0                    | 0                   | 0                    |
| <b>seq679</b>  | Firmicutes    | Clostridia   | 0                   | 0                    | 0                   | 0                    |
| <b>seq692</b>  | Firmicutes    | Clostridia   | 0                   | 0                    | 0                   | 0                    |
| <b>seq748</b>  | Firmicutes    | Clostridia   | 0                   | 0                    | 0                   | 0                    |
| <b>seq777</b>  | Firmicutes    | Clostridia   | 0                   | 0                    | 0                   | 0                    |
| <b>seq972</b>  | Firmicutes    | Clostridia   | 0                   | 0                    | 7                   | 19                   |
| <b>seq1008</b> | Firmicutes    | Clostridia   | 0                   | 0                    | 36                  | 103                  |
| <b>seq1045</b> | Firmicutes    | Clostridia   | 0                   | 0                    | 0                   | 0                    |
| <b>seq1083</b> | Firmicutes    | Clostridia   | 0                   | 0                    | 0                   | 0                    |
| <b>seq1106</b> | Firmicutes    | Clostridia   | 0                   | 0                    | 0                   | 0                    |
| <b>seq1237</b> | Firmicutes    | Clostridia   | 0                   | 0                    | 0                   | 0                    |
| <b>seq1312</b> | Firmicutes    | Clostridia   | 0                   | 0                    | 0                   | 0                    |

Sequence Count Table

|                | <b>Phylum</b> | <b>Class</b> | <b>Subject17WK0</b> | <b>Subject17WK12</b> | <b>Subject1WK0</b> | <b>Subject1WK12</b> |
|----------------|---------------|--------------|---------------------|----------------------|--------------------|---------------------|
| <b>seq1588</b> | Firmicutes    | Clostridia   | 0                   | 0                    | 0                  | 0                   |
| <b>seq1701</b> | Firmicutes    | Clostridia   | 0                   | 0                    | 0                  | 0                   |
| <b>seq1702</b> | Firmicutes    | Clostridia   | 0                   | 0                    | 0                  | 0                   |
| <b>seq1877</b> | Firmicutes    | Clostridia   | 0                   | 0                    | 0                  | 0                   |
| <b>seq1806</b> | Firmicutes    | Clostridia   | 0                   | 0                    | 0                  | 0                   |
| <b>seq142</b>  | Firmicutes    | Clostridia   | 10                  | 21                   | 0                  | 0                   |
| <b>seq327</b>  | Firmicutes    | Clostridia   | 0                   | 0                    | 0                  | 0                   |
| <b>seq710</b>  | Firmicutes    | Clostridia   | 0                   | 0                    | 0                  | 0                   |
| <b>seq721</b>  | Firmicutes    | Clostridia   | 0                   | 0                    | 0                  | 0                   |
| <b>seq839</b>  | Firmicutes    | Clostridia   | 0                   | 0                    | 0                  | 0                   |
| <b>seq842</b>  | Firmicutes    | Clostridia   | 0                   | 0                    | 0                  | 0                   |
| <b>seq866</b>  | Firmicutes    | Clostridia   | 0                   | 0                    | 0                  | 0                   |
| <b>seq924</b>  | Firmicutes    | Clostridia   | 0                   | 0                    | 0                  | 0                   |
| <b>seq1018</b> | Firmicutes    | Clostridia   | 0                   | 0                    | 0                  | 0                   |
| <b>seq1063</b> | Firmicutes    | Clostridia   | 0                   | 0                    | 0                  | 0                   |
| <b>seq1260</b> | Firmicutes    | Clostridia   | 0                   | 0                    | 0                  | 0                   |
| <b>seq1874</b> | Firmicutes    | Clostridia   | 4                   | 0                    | 0                  | 0                   |
| <b>seq1155</b> | Firmicutes    | Clostridia   | 84                  | 0                    | 0                  | 0                   |
| <b>seq159</b>  | Firmicutes    | Clostridia   | 0                   | 0                    | 0                  | 0                   |
| <b>seq301</b>  | Firmicutes    | Clostridia   | 0                   | 14                   | 0                  | 0                   |
| <b>seq599</b>  | Firmicutes    | Clostridia   | 0                   | 0                    | 0                  | 0                   |
| <b>seq679</b>  | Firmicutes    | Clostridia   | 49                  | 15                   | 50                 | 85                  |
| <b>seq692</b>  | Firmicutes    | Clostridia   | 0                   | 0                    | 0                  | 0                   |
| <b>seq748</b>  | Firmicutes    | Clostridia   | 0                   | 0                    | 0                  | 0                   |
| <b>seq777</b>  | Firmicutes    | Clostridia   | 0                   | 0                    | 0                  | 0                   |
| <b>seq972</b>  | Firmicutes    | Clostridia   | 0                   | 0                    | 22                 | 26                  |
| <b>seq1008</b> | Firmicutes    | Clostridia   | 0                   | 0                    | 0                  | 0                   |
| <b>seq1045</b> | Firmicutes    | Clostridia   | 0                   | 0                    | 0                  | 0                   |
| <b>seq1083</b> | Firmicutes    | Clostridia   | 0                   | 0                    | 0                  | 0                   |
| <b>seq1106</b> | Firmicutes    | Clostridia   | 0                   | 0                    | 0                  | 0                   |
| <b>seq1237</b> | Firmicutes    | Clostridia   | 0                   | 0                    | 0                  | 0                   |
| <b>seq1312</b> | Firmicutes    | Clostridia   | 0                   | 0                    | 0                  | 0                   |

Sequence Count Table

|                | <b>Phylum</b> | <b>Class</b> | <b>Subject2WK0</b> | <b>Subject2WK12</b> | <b>Subject3WK0</b> | <b>Subject3WK12</b> |
|----------------|---------------|--------------|--------------------|---------------------|--------------------|---------------------|
| <b>seq1588</b> | Firmicutes    | Clostridia   | 0                  | 0                   | 0                  | 0                   |
| <b>seq1701</b> | Firmicutes    | Clostridia   | 0                  | 0                   | 0                  | 0                   |
| <b>seq1702</b> | Firmicutes    | Clostridia   | 0                  | 0                   | 0                  | 0                   |
| <b>seq1877</b> | Firmicutes    | Clostridia   | 0                  | 0                   | 0                  | 0                   |
| <b>seq1806</b> | Firmicutes    | Clostridia   | 0                  | 0                   | 0                  | 0                   |
| <b>seq142</b>  | Firmicutes    | Clostridia   | 109                | 0                   | 0                  | 0                   |
| <b>seq327</b>  | Firmicutes    | Clostridia   | 0                  | 22                  | 0                  | 440                 |
| <b>seq710</b>  | Firmicutes    | Clostridia   | 0                  | 0                   | 0                  | 318                 |
| <b>seq721</b>  | Firmicutes    | Clostridia   | 0                  | 0                   | 0                  | 0                   |
| <b>seq839</b>  | Firmicutes    | Clostridia   | 0                  | 0                   | 0                  | 0                   |
| <b>seq842</b>  | Firmicutes    | Clostridia   | 0                  | 0                   | 0                  | 0                   |
| <b>seq866</b>  | Firmicutes    | Clostridia   | 0                  | 0                   | 0                  | 0                   |
| <b>seq924</b>  | Firmicutes    | Clostridia   | 0                  | 0                   | 0                  | 0                   |
| <b>seq1018</b> | Firmicutes    | Clostridia   | 0                  | 0                   | 0                  | 0                   |
| <b>seq1063</b> | Firmicutes    | Clostridia   | 0                  | 0                   | 0                  | 0                   |
| <b>seq1260</b> | Firmicutes    | Clostridia   | 0                  | 0                   | 0                  | 65                  |
| <b>seq1874</b> | Firmicutes    | Clostridia   | 0                  | 0                   | 0                  | 0                   |
| <b>seq1155</b> | Firmicutes    | Clostridia   | 0                  | 0                   | 0                  | 0                   |
| <b>seq159</b>  | Firmicutes    | Clostridia   | 0                  | 0                   | 0                  | 0                   |
| <b>seq301</b>  | Firmicutes    | Clostridia   | 0                  | 0                   | 0                  | 0                   |
| <b>seq599</b>  | Firmicutes    | Clostridia   | 0                  | 0                   | 0                  | 0                   |
| <b>seq679</b>  | Firmicutes    | Clostridia   | 0                  | 0                   | 0                  | 0                   |
| <b>seq692</b>  | Firmicutes    | Clostridia   | 0                  | 0                   | 0                  | 0                   |
| <b>seq748</b>  | Firmicutes    | Clostridia   | 0                  | 0                   | 0                  | 0                   |
| <b>seq777</b>  | Firmicutes    | Clostridia   | 0                  | 0                   | 0                  | 0                   |
| <b>seq972</b>  | Firmicutes    | Clostridia   | 0                  | 0                   | 0                  | 0                   |
| <b>seq1008</b> | Firmicutes    | Clostridia   | 0                  | 0                   | 0                  | 0                   |
| <b>seq1045</b> | Firmicutes    | Clostridia   | 0                  | 0                   | 0                  | 0                   |
| <b>seq1083</b> | Firmicutes    | Clostridia   | 0                  | 0                   | 0                  | 0                   |
| <b>seq1106</b> | Firmicutes    | Clostridia   | 0                  | 0                   | 0                  | 0                   |
| <b>seq1237</b> | Firmicutes    | Clostridia   | 0                  | 0                   | 0                  | 0                   |
| <b>seq1312</b> | Firmicutes    | Clostridia   | 0                  | 0                   | 0                  | 0                   |

Sequence Count Table

|                | <b>Phylum</b> | <b>Class</b> | <b>Subject4WK0</b> | <b>Subject4WK12</b> | <b>Subject5WK0</b> | <b>Subject5WK12</b> |
|----------------|---------------|--------------|--------------------|---------------------|--------------------|---------------------|
| <b>seq1588</b> | Firmicutes    | Clostridia   | 0                  | 0                   | 0                  | 0                   |
| <b>seq1701</b> | Firmicutes    | Clostridia   | 0                  | 0                   | 0                  | 0                   |
| <b>seq1702</b> | Firmicutes    | Clostridia   | 0                  | 0                   | 0                  | 0                   |
| <b>seq1877</b> | Firmicutes    | Clostridia   | 0                  | 0                   | 4                  | 0                   |
| <b>seq1806</b> | Firmicutes    | Clostridia   | 0                  | 7                   | 0                  | 0                   |
| <b>seq142</b>  | Firmicutes    | Clostridia   | 30                 | 76                  | 87                 | 35                  |
| <b>seq327</b>  | Firmicutes    | Clostridia   | 0                  | 0                   | 0                  | 0                   |
| <b>seq710</b>  | Firmicutes    | Clostridia   | 0                  | 0                   | 0                  | 0                   |
| <b>seq721</b>  | Firmicutes    | Clostridia   | 0                  | 0                   | 0                  | 0                   |
| <b>seq839</b>  | Firmicutes    | Clostridia   | 0                  | 0                   | 0                  | 0                   |
| <b>seq842</b>  | Firmicutes    | Clostridia   | 0                  | 0                   | 0                  | 0                   |
| <b>seq866</b>  | Firmicutes    | Clostridia   | 0                  | 0                   | 3                  | 0                   |
| <b>seq924</b>  | Firmicutes    | Clostridia   | 0                  | 0                   | 0                  | 0                   |
| <b>seq1018</b> | Firmicutes    | Clostridia   | 0                  | 0                   | 0                  | 0                   |
| <b>seq1063</b> | Firmicutes    | Clostridia   | 0                  | 0                   | 0                  | 0                   |
| <b>seq1260</b> | Firmicutes    | Clostridia   | 0                  | 0                   | 0                  | 0                   |
| <b>seq1874</b> | Firmicutes    | Clostridia   | 0                  | 0                   | 0                  | 0                   |
| <b>seq1155</b> | Firmicutes    | Clostridia   | 0                  | 0                   | 0                  | 0                   |
| <b>seq159</b>  | Firmicutes    | Clostridia   | 0                  | 0                   | 0                  | 0                   |
| <b>seq301</b>  | Firmicutes    | Clostridia   | 154                | 0                   | 0                  | 0                   |
| <b>seq599</b>  | Firmicutes    | Clostridia   | 0                  | 0                   | 0                  | 0                   |
| <b>seq679</b>  | Firmicutes    | Clostridia   | 0                  | 0                   | 7                  | 8                   |
| <b>seq692</b>  | Firmicutes    | Clostridia   | 0                  | 0                   | 19                 | 0                   |
| <b>seq748</b>  | Firmicutes    | Clostridia   | 0                  | 0                   | 0                  | 0                   |
| <b>seq777</b>  | Firmicutes    | Clostridia   | 0                  | 0                   | 0                  | 0                   |
| <b>seq972</b>  | Firmicutes    | Clostridia   | 0                  | 0                   | 0                  | 0                   |
| <b>seq1008</b> | Firmicutes    | Clostridia   | 0                  | 0                   | 0                  | 0                   |
| <b>seq1045</b> | Firmicutes    | Clostridia   | 0                  | 0                   | 0                  | 0                   |
| <b>seq1083</b> | Firmicutes    | Clostridia   | 0                  | 0                   | 0                  | 0                   |
| <b>seq1106</b> | Firmicutes    | Clostridia   | 0                  | 0                   | 0                  | 0                   |
| <b>seq1237</b> | Firmicutes    | Clostridia   | 0                  | 0                   | 0                  | 0                   |
| <b>seq1312</b> | Firmicutes    | Clostridia   | 26                 | 28                  | 0                  | 0                   |



Sequence Count Table

|                | <b>Phylum</b> | <b>Class</b> | <b>Subject6WK0</b> | <b>Subject6WK12</b> | <b>Subject18WK0</b> | <b>Subject18WK12</b> |
|----------------|---------------|--------------|--------------------|---------------------|---------------------|----------------------|
| <b>seq1588</b> | Firmicutes    | Clostridia   | 0                  | 0                   | 0                   | 0                    |
| <b>seq1701</b> | Firmicutes    | Clostridia   | 0                  | 0                   | 0                   | 0                    |
| <b>seq1702</b> | Firmicutes    | Clostridia   | 0                  | 0                   | 0                   | 0                    |
| <b>seq1877</b> | Firmicutes    | Clostridia   | 0                  | 0                   | 0                   | 0                    |
| <b>seq1806</b> | Firmicutes    | Clostridia   | 0                  | 0                   | 0                   | 0                    |
| <b>seq142</b>  | Firmicutes    | Clostridia   | 0                  | 0                   | 66                  | 0                    |
| <b>seq327</b>  | Firmicutes    | Clostridia   | 10                 | 33                  | 117                 | 0                    |
| <b>seq710</b>  | Firmicutes    | Clostridia   | 0                  | 0                   | 46                  | 0                    |
| <b>seq721</b>  | Firmicutes    | Clostridia   | 0                  | 0                   | 0                   | 0                    |
| <b>seq839</b>  | Firmicutes    | Clostridia   | 136                | 0                   | 0                   | 0                    |
| <b>seq842</b>  | Firmicutes    | Clostridia   | 0                  | 0                   | 0                   | 0                    |
| <b>seq866</b>  | Firmicutes    | Clostridia   | 0                  | 0                   | 0                   | 0                    |
| <b>seq924</b>  | Firmicutes    | Clostridia   | 0                  | 0                   | 0                   | 0                    |
| <b>seq1018</b> | Firmicutes    | Clostridia   | 0                  | 0                   | 0                   | 0                    |
| <b>seq1063</b> | Firmicutes    | Clostridia   | 0                  | 0                   | 0                   | 0                    |
| <b>seq1260</b> | Firmicutes    | Clostridia   | 0                  | 0                   | 0                   | 0                    |
| <b>seq1874</b> | Firmicutes    | Clostridia   | 0                  | 0                   | 0                   | 0                    |
| <b>seq1155</b> | Firmicutes    | Clostridia   | 7                  | 0                   | 0                   | 0                    |
| <b>seq159</b>  | Firmicutes    | Clostridia   | 0                  | 0                   | 0                   | 0                    |
| <b>seq301</b>  | Firmicutes    | Clostridia   | 250                | 161                 | 0                   | 0                    |
| <b>seq599</b>  | Firmicutes    | Clostridia   | 0                  | 0                   | 0                   | 0                    |
| <b>seq679</b>  | Firmicutes    | Clostridia   | 38                 | 35                  | 0                   | 0                    |
| <b>seq692</b>  | Firmicutes    | Clostridia   | 27                 | 0                   | 0                   | 0                    |
| <b>seq748</b>  | Firmicutes    | Clostridia   | 0                  | 0                   | 0                   | 0                    |
| <b>seq777</b>  | Firmicutes    | Clostridia   | 118                | 127                 | 0                   | 0                    |
| <b>seq972</b>  | Firmicutes    | Clostridia   | 0                  | 0                   | 0                   | 0                    |
| <b>seq1008</b> | Firmicutes    | Clostridia   | 0                  | 0                   | 0                   | 0                    |
| <b>seq1045</b> | Firmicutes    | Clostridia   | 0                  | 0                   | 0                   | 0                    |
| <b>seq1083</b> | Firmicutes    | Clostridia   | 0                  | 0                   | 0                   | 0                    |
| <b>seq1106</b> | Firmicutes    | Clostridia   | 0                  | 0                   | 0                   | 0                    |
| <b>seq1237</b> | Firmicutes    | Clostridia   | 0                  | 0                   | 0                   | 0                    |
| <b>seq1312</b> | Firmicutes    | Clostridia   | 0                  | 0                   | 0                   | 0                    |

Sequence Count Table

|                | <b>Phylum</b> | <b>Class</b> | <b>Subject19WK0</b> | <b>Subject19WK12</b> | <b>Subject20WK0</b> | <b>Subject20WK12</b> |
|----------------|---------------|--------------|---------------------|----------------------|---------------------|----------------------|
| <b>seq1588</b> | Firmicutes    | Clostridia   | 0                   | 0                    | 0                   | 0                    |
| <b>seq1701</b> | Firmicutes    | Clostridia   | 0                   | 0                    | 0                   | 0                    |
| <b>seq1702</b> | Firmicutes    | Clostridia   | 0                   | 0                    | 0                   | 0                    |
| <b>seq1877</b> | Firmicutes    | Clostridia   | 0                   | 0                    | 0                   | 0                    |
| <b>seq1806</b> | Firmicutes    | Clostridia   | 0                   | 0                    | 0                   | 0                    |
| <b>seq142</b>  | Firmicutes    | Clostridia   | 0                   | 0                    | 472                 | 0                    |
| <b>seq327</b>  | Firmicutes    | Clostridia   | 79                  | 0                    | 0                   | 0                    |
| <b>seq710</b>  | Firmicutes    | Clostridia   | 0                   | 0                    | 0                   | 0                    |
| <b>seq721</b>  | Firmicutes    | Clostridia   | 0                   | 0                    | 33                  | 0                    |
| <b>seq839</b>  | Firmicutes    | Clostridia   | 0                   | 0                    | 0                   | 0                    |
| <b>seq842</b>  | Firmicutes    | Clostridia   | 0                   | 0                    | 0                   | 0                    |
| <b>seq866</b>  | Firmicutes    | Clostridia   | 0                   | 0                    | 105                 | 0                    |
| <b>seq924</b>  | Firmicutes    | Clostridia   | 0                   | 0                    | 0                   | 0                    |
| <b>seq1018</b> | Firmicutes    | Clostridia   | 0                   | 0                    | 0                   | 0                    |
| <b>seq1063</b> | Firmicutes    | Clostridia   | 0                   | 0                    | 0                   | 0                    |
| <b>seq1260</b> | Firmicutes    | Clostridia   | 0                   | 0                    | 0                   | 0                    |
| <b>seq1874</b> | Firmicutes    | Clostridia   | 0                   | 0                    | 0                   | 0                    |
| <b>seq1155</b> | Firmicutes    | Clostridia   | 0                   | 0                    | 0                   | 0                    |
| <b>seq159</b>  | Firmicutes    | Clostridia   | 0                   | 0                    | 708                 | 0                    |
| <b>seq301</b>  | Firmicutes    | Clostridia   | 0                   | 0                    | 223                 | 0                    |
| <b>seq599</b>  | Firmicutes    | Clostridia   | 0                   | 0                    | 0                   | 0                    |
| <b>seq679</b>  | Firmicutes    | Clostridia   | 0                   | 0                    | 0                   | 0                    |
| <b>seq692</b>  | Firmicutes    | Clostridia   | 0                   | 0                    | 248                 | 4                    |
| <b>seq748</b>  | Firmicutes    | Clostridia   | 0                   | 0                    | 0                   | 0                    |
| <b>seq777</b>  | Firmicutes    | Clostridia   | 0                   | 0                    | 0                   | 0                    |
| <b>seq972</b>  | Firmicutes    | Clostridia   | 0                   | 0                    | 0                   | 0                    |
| <b>seq1008</b> | Firmicutes    | Clostridia   | 0                   | 0                    | 0                   | 0                    |
| <b>seq1045</b> | Firmicutes    | Clostridia   | 0                   | 0                    | 115                 | 11                   |
| <b>seq1083</b> | Firmicutes    | Clostridia   | 0                   | 0                    | 0                   | 0                    |
| <b>seq1106</b> | Firmicutes    | Clostridia   | 0                   | 0                    | 0                   | 0                    |
| <b>seq1237</b> | Firmicutes    | Clostridia   | 0                   | 0                    | 0                   | 0                    |
| <b>seq1312</b> | Firmicutes    | Clostridia   | 0                   | 0                    | 0                   | 0                    |

Sequence Count Table

|                | <b>Phylum</b> | <b>Class</b> | <b>Subject7WK0</b> | <b>Subject7WK12</b> | <b>Subject21WK0</b> | <b>Subject21WK12</b> |
|----------------|---------------|--------------|--------------------|---------------------|---------------------|----------------------|
| <b>seq1588</b> | Firmicutes    | Clostridia   | 0                  | 0                   | 0                   | 0                    |
| <b>seq1701</b> | Firmicutes    | Clostridia   | 0                  | 0                   | 0                   | 0                    |
| <b>seq1702</b> | Firmicutes    | Clostridia   | 0                  | 0                   | 0                   | 0                    |
| <b>seq1877</b> | Firmicutes    | Clostridia   | 0                  | 0                   | 0                   | 0                    |
| <b>seq1806</b> | Firmicutes    | Clostridia   | 0                  | 0                   | 0                   | 0                    |
| <b>seq142</b>  | Firmicutes    | Clostridia   | 7                  | 419                 | 0                   | 0                    |
| <b>seq327</b>  | Firmicutes    | Clostridia   | 0                  | 0                   | 0                   | 0                    |
| <b>seq710</b>  | Firmicutes    | Clostridia   | 0                  | 0                   | 0                   | 0                    |
| <b>seq721</b>  | Firmicutes    | Clostridia   | 0                  | 0                   | 0                   | 0                    |
| <b>seq839</b>  | Firmicutes    | Clostridia   | 0                  | 0                   | 0                   | 0                    |
| <b>seq842</b>  | Firmicutes    | Clostridia   | 0                  | 0                   | 0                   | 0                    |
| <b>seq866</b>  | Firmicutes    | Clostridia   | 0                  | 0                   | 0                   | 0                    |
| <b>seq924</b>  | Firmicutes    | Clostridia   | 0                  | 0                   | 0                   | 0                    |
| <b>seq1018</b> | Firmicutes    | Clostridia   | 0                  | 0                   | 0                   | 0                    |
| <b>seq1063</b> | Firmicutes    | Clostridia   | 0                  | 0                   | 0                   | 0                    |
| <b>seq1260</b> | Firmicutes    | Clostridia   | 0                  | 0                   | 0                   | 0                    |
| <b>seq1874</b> | Firmicutes    | Clostridia   | 0                  | 0                   | 0                   | 0                    |
| <b>seq1155</b> | Firmicutes    | Clostridia   | 0                  | 0                   | 0                   | 0                    |
| <b>seq159</b>  | Firmicutes    | Clostridia   | 0                  | 0                   | 0                   | 0                    |
| <b>seq301</b>  | Firmicutes    | Clostridia   | 0                  | 0                   | 0                   | 0                    |
| <b>seq599</b>  | Firmicutes    | Clostridia   | 0                  | 48                  | 0                   | 0                    |
| <b>seq679</b>  | Firmicutes    | Clostridia   | 0                  | 0                   | 0                   | 0                    |
| <b>seq692</b>  | Firmicutes    | Clostridia   | 0                  | 0                   | 0                   | 0                    |
| <b>seq748</b>  | Firmicutes    | Clostridia   | 0                  | 0                   | 0                   | 0                    |
| <b>seq777</b>  | Firmicutes    | Clostridia   | 0                  | 0                   | 0                   | 0                    |
| <b>seq972</b>  | Firmicutes    | Clostridia   | 14                 | 0                   | 0                   | 0                    |
| <b>seq1008</b> | Firmicutes    | Clostridia   | 0                  | 0                   | 0                   | 0                    |
| <b>seq1045</b> | Firmicutes    | Clostridia   | 0                  | 0                   | 0                   | 0                    |
| <b>seq1083</b> | Firmicutes    | Clostridia   | 0                  | 0                   | 0                   | 0                    |
| <b>seq1106</b> | Firmicutes    | Clostridia   | 0                  | 0                   | 0                   | 0                    |
| <b>seq1237</b> | Firmicutes    | Clostridia   | 0                  | 0                   | 0                   | 0                    |
| <b>seq1312</b> | Firmicutes    | Clostridia   | 0                  | 0                   | 0                   | 0                    |

Sequence Count Table

|                | <b>Phylum</b> | <b>Class</b> | <b>Subject8WK0</b> | <b>Subject8WK12</b> | <b>Subject9WK0</b> | <b>Subject9WK12</b> |
|----------------|---------------|--------------|--------------------|---------------------|--------------------|---------------------|
| <b>seq1588</b> | Firmicutes    | Clostridia   | 0                  | 0                   | 0                  | 0                   |
| <b>seq1701</b> | Firmicutes    | Clostridia   | 0                  | 0                   | 0                  | 0                   |
| <b>seq1702</b> | Firmicutes    | Clostridia   | 0                  | 0                   | 0                  | 0                   |
| <b>seq1877</b> | Firmicutes    | Clostridia   | 0                  | 0                   | 0                  | 0                   |
| <b>seq1806</b> | Firmicutes    | Clostridia   | 0                  | 0                   | 0                  | 0                   |
| <b>seq142</b>  | Firmicutes    | Clostridia   | 0                  | 0                   | 215                | 0                   |
| <b>seq327</b>  | Firmicutes    | Clostridia   | 0                  | 0                   | 0                  | 31                  |
| <b>seq710</b>  | Firmicutes    | Clostridia   | 0                  | 0                   | 0                  | 0                   |
| <b>seq721</b>  | Firmicutes    | Clostridia   | 0                  | 0                   | 0                  | 0                   |
| <b>seq839</b>  | Firmicutes    | Clostridia   | 0                  | 0                   | 0                  | 0                   |
| <b>seq842</b>  | Firmicutes    | Clostridia   | 0                  | 0                   | 0                  | 0                   |
| <b>seq866</b>  | Firmicutes    | Clostridia   | 0                  | 0                   | 0                  | 0                   |
| <b>seq924</b>  | Firmicutes    | Clostridia   | 0                  | 0                   | 0                  | 0                   |
| <b>seq1018</b> | Firmicutes    | Clostridia   | 0                  | 0                   | 0                  | 0                   |
| <b>seq1063</b> | Firmicutes    | Clostridia   | 0                  | 0                   | 0                  | 0                   |
| <b>seq1260</b> | Firmicutes    | Clostridia   | 0                  | 0                   | 0                  | 0                   |
| <b>seq1874</b> | Firmicutes    | Clostridia   | 0                  | 0                   | 0                  | 0                   |
| <b>seq1155</b> | Firmicutes    | Clostridia   | 0                  | 0                   | 0                  | 0                   |
| <b>seq159</b>  | Firmicutes    | Clostridia   | 0                  | 0                   | 0                  | 0                   |
| <b>seq301</b>  | Firmicutes    | Clostridia   | 0                  | 0                   | 0                  | 0                   |
| <b>seq599</b>  | Firmicutes    | Clostridia   | 0                  | 0                   | 0                  | 0                   |
| <b>seq679</b>  | Firmicutes    | Clostridia   | 0                  | 0                   | 0                  | 0                   |
| <b>seq692</b>  | Firmicutes    | Clostridia   | 0                  | 0                   | 0                  | 0                   |
| <b>seq748</b>  | Firmicutes    | Clostridia   | 0                  | 0                   | 0                  | 0                   |
| <b>seq777</b>  | Firmicutes    | Clostridia   | 0                  | 0                   | 0                  | 0                   |
| <b>seq972</b>  | Firmicutes    | Clostridia   | 0                  | 0                   | 14                 | 0                   |
| <b>seq1008</b> | Firmicutes    | Clostridia   | 0                  | 0                   | 0                  | 0                   |
| <b>seq1045</b> | Firmicutes    | Clostridia   | 0                  | 0                   | 0                  | 0                   |
| <b>seq1083</b> | Firmicutes    | Clostridia   | 0                  | 0                   | 0                  | 0                   |
| <b>seq1106</b> | Firmicutes    | Clostridia   | 0                  | 0                   | 0                  | 0                   |
| <b>seq1237</b> | Firmicutes    | Clostridia   | 0                  | 0                   | 0                  | 0                   |
| <b>seq1312</b> | Firmicutes    | Clostridia   | 0                  | 0                   | 0                  | 0                   |

Sequence Count Table

|                | <b>Phylum</b> | <b>Class</b> | <b>Subject10WK0</b> | <b>Subject10WK12</b> | <b>Subject22WK0</b> | <b>Subject22WK12</b> |
|----------------|---------------|--------------|---------------------|----------------------|---------------------|----------------------|
| <b>seq1588</b> | Firmicutes    | Clostridia   | 0                   | 0                    | 0                   | 0                    |
| <b>seq1701</b> | Firmicutes    | Clostridia   | 0                   | 0                    | 0                   | 0                    |
| <b>seq1702</b> | Firmicutes    | Clostridia   | 0                   | 0                    | 0                   | 0                    |
| <b>seq1877</b> | Firmicutes    | Clostridia   | 0                   | 0                    | 0                   | 0                    |
| <b>seq1806</b> | Firmicutes    | Clostridia   | 0                   | 0                    | 0                   | 0                    |
| <b>seq142</b>  | Firmicutes    | Clostridia   | 0                   | 128                  | 45                  | 0                    |
| <b>seq327</b>  | Firmicutes    | Clostridia   | 0                   | 0                    | 0                   | 72                   |
| <b>seq710</b>  | Firmicutes    | Clostridia   | 0                   | 0                    | 0                   | 0                    |
| <b>seq721</b>  | Firmicutes    | Clostridia   | 0                   | 0                    | 0                   | 0                    |
| <b>seq839</b>  | Firmicutes    | Clostridia   | 0                   | 0                    | 0                   | 0                    |
| <b>seq842</b>  | Firmicutes    | Clostridia   | 0                   | 0                    | 0                   | 0                    |
| <b>seq866</b>  | Firmicutes    | Clostridia   | 0                   | 0                    | 0                   | 0                    |
| <b>seq924</b>  | Firmicutes    | Clostridia   | 0                   | 0                    | 0                   | 0                    |
| <b>seq1018</b> | Firmicutes    | Clostridia   | 0                   | 0                    | 0                   | 0                    |
| <b>seq1063</b> | Firmicutes    | Clostridia   | 0                   | 0                    | 0                   | 0                    |
| <b>seq1260</b> | Firmicutes    | Clostridia   | 0                   | 0                    | 0                   | 0                    |
| <b>seq1874</b> | Firmicutes    | Clostridia   | 0                   | 0                    | 0                   | 0                    |
| <b>seq1155</b> | Firmicutes    | Clostridia   | 0                   | 0                    | 0                   | 0                    |
| <b>seq159</b>  | Firmicutes    | Clostridia   | 0                   | 0                    | 3083                | 3610                 |
| <b>seq301</b>  | Firmicutes    | Clostridia   | 0                   | 0                    | 446                 | 277                  |
| <b>seq599</b>  | Firmicutes    | Clostridia   | 15                  | 0                    | 0                   | 0                    |
| <b>seq679</b>  | Firmicutes    | Clostridia   | 0                   | 5                    | 0                   | 0                    |
| <b>seq692</b>  | Firmicutes    | Clostridia   | 0                   | 0                    | 0                   | 0                    |
| <b>seq748</b>  | Firmicutes    | Clostridia   | 0                   | 0                    | 159                 | 158                  |
| <b>seq777</b>  | Firmicutes    | Clostridia   | 0                   | 0                    | 0                   | 0                    |
| <b>seq972</b>  | Firmicutes    | Clostridia   | 0                   | 0                    | 0                   | 0                    |
| <b>seq1008</b> | Firmicutes    | Clostridia   | 0                   | 0                    | 0                   | 0                    |
| <b>seq1045</b> | Firmicutes    | Clostridia   | 0                   | 0                    | 0                   | 0                    |
| <b>seq1083</b> | Firmicutes    | Clostridia   | 0                   | 0                    | 87                  | 24                   |
| <b>seq1106</b> | Firmicutes    | Clostridia   | 0                   | 0                    | 18                  | 17                   |
| <b>seq1237</b> | Firmicutes    | Clostridia   | 0                   | 0                    | 0                   | 0                    |
| <b>seq1312</b> | Firmicutes    | Clostridia   | 0                   | 0                    | 0                   | 0                    |

Sequence Count Table

|                | <b>Phylum</b> | <b>Class</b> | <b>Subject23WK0</b> | <b>Subject23WK12</b> | <b>Subject24WK0</b> | <b>Subject24WK12</b> |
|----------------|---------------|--------------|---------------------|----------------------|---------------------|----------------------|
| <b>seq1588</b> | Firmicutes    | Clostridia   | 0                   | 0                    | 0                   | 0                    |
| <b>seq1701</b> | Firmicutes    | Clostridia   | 0                   | 13                   | 0                   | 0                    |
| <b>seq1702</b> | Firmicutes    | Clostridia   | 0                   | 0                    | 0                   | 0                    |
| <b>seq1877</b> | Firmicutes    | Clostridia   | 0                   | 0                    | 0                   | 0                    |
| <b>seq1806</b> | Firmicutes    | Clostridia   | 0                   | 0                    | 0                   | 0                    |
| <b>seq142</b>  | Firmicutes    | Clostridia   | 148                 | 531                  | 1279                | 109                  |
| <b>seq327</b>  | Firmicutes    | Clostridia   | 35                  | 36                   | 0                   | 205                  |
| <b>seq710</b>  | Firmicutes    | Clostridia   | 0                   | 0                    | 0                   | 0                    |
| <b>seq721</b>  | Firmicutes    | Clostridia   | 0                   | 125                  | 192                 | 0                    |
| <b>seq839</b>  | Firmicutes    | Clostridia   | 0                   | 0                    | 78                  | 20                   |
| <b>seq842</b>  | Firmicutes    | Clostridia   | 0                   | 0                    | 0                   | 0                    |
| <b>seq866</b>  | Firmicutes    | Clostridia   | 0                   | 0                    | 0                   | 0                    |
| <b>seq924</b>  | Firmicutes    | Clostridia   | 0                   | 0                    | 0                   | 0                    |
| <b>seq1018</b> | Firmicutes    | Clostridia   | 0                   | 0                    | 0                   | 0                    |
| <b>seq1063</b> | Firmicutes    | Clostridia   | 0                   | 22                   | 0                   | 0                    |
| <b>seq1260</b> | Firmicutes    | Clostridia   | 0                   | 0                    | 0                   | 0                    |
| <b>seq1874</b> | Firmicutes    | Clostridia   | 0                   | 0                    | 0                   | 0                    |
| <b>seq1155</b> | Firmicutes    | Clostridia   | 0                   | 0                    | 0                   | 0                    |
| <b>seq159</b>  | Firmicutes    | Clostridia   | 0                   | 0                    | 0                   | 0                    |
| <b>seq301</b>  | Firmicutes    | Clostridia   | 0                   | 13                   | 0                   | 0                    |
| <b>seq599</b>  | Firmicutes    | Clostridia   | 10                  | 224                  | 53                  | 86                   |
| <b>seq679</b>  | Firmicutes    | Clostridia   | 0                   | 0                    | 7                   | 37                   |
| <b>seq692</b>  | Firmicutes    | Clostridia   | 0                   | 0                    | 0                   | 0                    |
| <b>seq748</b>  | Firmicutes    | Clostridia   | 0                   | 0                    | 0                   | 0                    |
| <b>seq777</b>  | Firmicutes    | Clostridia   | 0                   | 0                    | 0                   | 0                    |
| <b>seq972</b>  | Firmicutes    | Clostridia   | 0                   | 0                    | 0                   | 0                    |
| <b>seq1008</b> | Firmicutes    | Clostridia   | 0                   | 0                    | 0                   | 0                    |
| <b>seq1045</b> | Firmicutes    | Clostridia   | 0                   | 0                    | 0                   | 0                    |
| <b>seq1083</b> | Firmicutes    | Clostridia   | 0                   | 0                    | 0                   | 0                    |
| <b>seq1106</b> | Firmicutes    | Clostridia   | 0                   | 0                    | 0                   | 0                    |
| <b>seq1237</b> | Firmicutes    | Clostridia   | 0                   | 0                    | 0                   | 0                    |
| <b>seq1312</b> | Firmicutes    | Clostridia   | 0                   | 0                    | 0                   | 0                    |

Sequence Count Table

|                | <b>Phylum</b> | <b>Class</b> | <b>Subject11WK0</b> | <b>Subject11WK12</b> | <b>Subject12WK0</b> | <b>Subject12WK12</b> |
|----------------|---------------|--------------|---------------------|----------------------|---------------------|----------------------|
| <b>seq1588</b> | Firmicutes    | Clostridia   | 0                   | 0                    | 0                   | 0                    |
| <b>seq1701</b> | Firmicutes    | Clostridia   | 0                   | 0                    | 0                   | 0                    |
| <b>seq1702</b> | Firmicutes    | Clostridia   | 0                   | 0                    | 0                   | 0                    |
| <b>seq1877</b> | Firmicutes    | Clostridia   | 0                   | 0                    | 0                   | 0                    |
| <b>seq1806</b> | Firmicutes    | Clostridia   | 0                   | 0                    | 0                   | 0                    |
| <b>seq142</b>  | Firmicutes    | Clostridia   | 0                   | 0                    | 8                   | 114                  |
| <b>seq327</b>  | Firmicutes    | Clostridia   | 0                   | 0                    | 0                   | 21                   |
| <b>seq710</b>  | Firmicutes    | Clostridia   | 0                   | 0                    | 0                   | 0                    |
| <b>seq721</b>  | Firmicutes    | Clostridia   | 0                   | 0                    | 0                   | 0                    |
| <b>seq839</b>  | Firmicutes    | Clostridia   | 0                   | 0                    | 0                   | 0                    |
| <b>seq842</b>  | Firmicutes    | Clostridia   | 0                   | 0                    | 0                   | 0                    |
| <b>seq866</b>  | Firmicutes    | Clostridia   | 0                   | 0                    | 0                   | 0                    |
| <b>seq924</b>  | Firmicutes    | Clostridia   | 0                   | 0                    | 0                   | 0                    |
| <b>seq1018</b> | Firmicutes    | Clostridia   | 0                   | 0                    | 0                   | 0                    |
| <b>seq1063</b> | Firmicutes    | Clostridia   | 0                   | 0                    | 0                   | 0                    |
| <b>seq1260</b> | Firmicutes    | Clostridia   | 0                   | 0                    | 0                   | 0                    |
| <b>seq1874</b> | Firmicutes    | Clostridia   | 0                   | 0                    | 0                   | 0                    |
| <b>seq1155</b> | Firmicutes    | Clostridia   | 0                   | 0                    | 0                   | 0                    |
| <b>seq159</b>  | Firmicutes    | Clostridia   | 0                   | 0                    | 0                   | 0                    |
| <b>seq301</b>  | Firmicutes    | Clostridia   | 0                   | 0                    | 0                   | 0                    |
| <b>seq599</b>  | Firmicutes    | Clostridia   | 0                   | 0                    | 0                   | 0                    |
| <b>seq679</b>  | Firmicutes    | Clostridia   | 0                   | 0                    | 0                   | 0                    |
| <b>seq692</b>  | Firmicutes    | Clostridia   | 0                   | 0                    | 0                   | 0                    |
| <b>seq748</b>  | Firmicutes    | Clostridia   | 0                   | 0                    | 0                   | 0                    |
| <b>seq777</b>  | Firmicutes    | Clostridia   | 0                   | 0                    | 0                   | 0                    |
| <b>seq972</b>  | Firmicutes    | Clostridia   | 0                   | 0                    | 0                   | 0                    |
| <b>seq1008</b> | Firmicutes    | Clostridia   | 0                   | 0                    | 0                   | 0                    |
| <b>seq1045</b> | Firmicutes    | Clostridia   | 0                   | 0                    | 0                   | 0                    |
| <b>seq1083</b> | Firmicutes    | Clostridia   | 0                   | 0                    | 0                   | 0                    |
| <b>seq1106</b> | Firmicutes    | Clostridia   | 0                   | 0                    | 0                   | 0                    |
| <b>seq1237</b> | Firmicutes    | Clostridia   | 0                   | 0                    | 0                   | 0                    |
| <b>seq1312</b> | Firmicutes    | Clostridia   | 0                   | 0                    | 0                   | 0                    |

Sequence Count Table

|                | <b>Phylum</b> | <b>Class</b> | <b>Subject25WK0</b> | <b>Subject25WK12</b> | <b>Subject38WK0</b> | <b>Subject38WK12</b> |
|----------------|---------------|--------------|---------------------|----------------------|---------------------|----------------------|
| <b>seq1588</b> | Firmicutes    | Clostridia   | 0                   | 0                    | 0                   | 0                    |
| <b>seq1701</b> | Firmicutes    | Clostridia   | 0                   | 0                    | 0                   | 0                    |
| <b>seq1702</b> | Firmicutes    | Clostridia   | 13                  | 0                    | 0                   | 0                    |
| <b>seq1877</b> | Firmicutes    | Clostridia   | 0                   | 0                    | 0                   | 0                    |
| <b>seq1806</b> | Firmicutes    | Clostridia   | 0                   | 0                    | 0                   | 0                    |
| <b>seq142</b>  | Firmicutes    | Clostridia   | 96                  | 139                  | 0                   | 0                    |
| <b>seq327</b>  | Firmicutes    | Clostridia   | 251                 | 0                    | 0                   | 0                    |
| <b>seq710</b>  | Firmicutes    | Clostridia   | 0                   | 0                    | 0                   | 0                    |
| <b>seq721</b>  | Firmicutes    | Clostridia   | 0                   | 0                    | 0                   | 0                    |
| <b>seq839</b>  | Firmicutes    | Clostridia   | 0                   | 0                    | 0                   | 0                    |
| <b>seq842</b>  | Firmicutes    | Clostridia   | 0                   | 0                    | 0                   | 0                    |
| <b>seq866</b>  | Firmicutes    | Clostridia   | 0                   | 0                    | 0                   | 0                    |
| <b>seq924</b>  | Firmicutes    | Clostridia   | 0                   | 0                    | 0                   | 0                    |
| <b>seq1018</b> | Firmicutes    | Clostridia   | 0                   | 0                    | 0                   | 0                    |
| <b>seq1063</b> | Firmicutes    | Clostridia   | 0                   | 0                    | 0                   | 0                    |
| <b>seq1260</b> | Firmicutes    | Clostridia   | 0                   | 0                    | 0                   | 0                    |
| <b>seq1874</b> | Firmicutes    | Clostridia   | 0                   | 0                    | 0                   | 0                    |
| <b>seq1155</b> | Firmicutes    | Clostridia   | 0                   | 0                    | 0                   | 0                    |
| <b>seq159</b>  | Firmicutes    | Clostridia   | 0                   | 0                    | 0                   | 0                    |
| <b>seq301</b>  | Firmicutes    | Clostridia   | 0                   | 0                    | 0                   | 0                    |
| <b>seq599</b>  | Firmicutes    | Clostridia   | 0                   | 0                    | 0                   | 0                    |
| <b>seq679</b>  | Firmicutes    | Clostridia   | 15                  | 7                    | 0                   | 0                    |
| <b>seq692</b>  | Firmicutes    | Clostridia   | 0                   | 0                    | 0                   | 0                    |
| <b>seq748</b>  | Firmicutes    | Clostridia   | 0                   | 0                    | 0                   | 0                    |
| <b>seq777</b>  | Firmicutes    | Clostridia   | 0                   | 0                    | 0                   | 0                    |
| <b>seq972</b>  | Firmicutes    | Clostridia   | 0                   | 0                    | 0                   | 0                    |
| <b>seq1008</b> | Firmicutes    | Clostridia   | 0                   | 0                    | 0                   | 0                    |
| <b>seq1045</b> | Firmicutes    | Clostridia   | 0                   | 0                    | 0                   | 0                    |
| <b>seq1083</b> | Firmicutes    | Clostridia   | 0                   | 0                    | 0                   | 0                    |
| <b>seq1106</b> | Firmicutes    | Clostridia   | 0                   | 0                    | 0                   | 0                    |
| <b>seq1237</b> | Firmicutes    | Clostridia   | 0                   | 0                    | 0                   | 0                    |
| <b>seq1312</b> | Firmicutes    | Clostridia   | 0                   | 0                    | 0                   | 0                    |



Sequence Count Table

|                | <b>Phylum</b> | <b>Class</b> | <b>Subject31WK0</b> | <b>Subject31WK12</b> | <b>Subject32WK0</b> | <b>Subject32WK12</b> |
|----------------|---------------|--------------|---------------------|----------------------|---------------------|----------------------|
| <b>seq1588</b> | Firmicutes    | Clostridia   | 0                   | 0                    | 0                   | 0                    |
| <b>seq1701</b> | Firmicutes    | Clostridia   | 0                   | 0                    | 0                   | 0                    |
| <b>seq1702</b> | Firmicutes    | Clostridia   | 0                   | 0                    | 0                   | 0                    |
| <b>seq1877</b> | Firmicutes    | Clostridia   | 0                   | 0                    | 0                   | 0                    |
| <b>seq1806</b> | Firmicutes    | Clostridia   | 0                   | 0                    | 0                   | 0                    |
| <b>seq142</b>  | Firmicutes    | Clostridia   | 0                   | 0                    | 112                 | 0                    |
| <b>seq327</b>  | Firmicutes    | Clostridia   | 0                   | 0                    | 0                   | 0                    |
| <b>seq710</b>  | Firmicutes    | Clostridia   | 0                   | 0                    | 0                   | 0                    |
| <b>seq721</b>  | Firmicutes    | Clostridia   | 0                   | 0                    | 0                   | 0                    |
| <b>seq839</b>  | Firmicutes    | Clostridia   | 0                   | 0                    | 0                   | 0                    |
| <b>seq842</b>  | Firmicutes    | Clostridia   | 0                   | 0                    | 0                   | 0                    |
| <b>seq866</b>  | Firmicutes    | Clostridia   | 0                   | 0                    | 0                   | 0                    |
| <b>seq924</b>  | Firmicutes    | Clostridia   | 0                   | 0                    | 0                   | 0                    |
| <b>seq1018</b> | Firmicutes    | Clostridia   | 0                   | 0                    | 0                   | 0                    |
| <b>seq1063</b> | Firmicutes    | Clostridia   | 0                   | 0                    | 0                   | 0                    |
| <b>seq1260</b> | Firmicutes    | Clostridia   | 0                   | 0                    | 0                   | 0                    |
| <b>seq1874</b> | Firmicutes    | Clostridia   | 0                   | 0                    | 0                   | 0                    |
| <b>seq1155</b> | Firmicutes    | Clostridia   | 0                   | 0                    | 0                   | 0                    |
| <b>seq159</b>  | Firmicutes    | Clostridia   | 0                   | 0                    | 0                   | 0                    |
| <b>seq301</b>  | Firmicutes    | Clostridia   | 0                   | 0                    | 0                   | 0                    |
| <b>seq599</b>  | Firmicutes    | Clostridia   | 0                   | 0                    | 0                   | 0                    |
| <b>seq679</b>  | Firmicutes    | Clostridia   | 0                   | 0                    | 0                   | 0                    |
| <b>seq692</b>  | Firmicutes    | Clostridia   | 0                   | 0                    | 0                   | 0                    |
| <b>seq748</b>  | Firmicutes    | Clostridia   | 0                   | 0                    | 0                   | 0                    |
| <b>seq777</b>  | Firmicutes    | Clostridia   | 0                   | 0                    | 0                   | 0                    |
| <b>seq972</b>  | Firmicutes    | Clostridia   | 0                   | 0                    | 0                   | 0                    |
| <b>seq1008</b> | Firmicutes    | Clostridia   | 0                   | 0                    | 0                   | 0                    |
| <b>seq1045</b> | Firmicutes    | Clostridia   | 0                   | 0                    | 0                   | 0                    |
| <b>seq1083</b> | Firmicutes    | Clostridia   | 0                   | 0                    | 0                   | 0                    |
| <b>seq1106</b> | Firmicutes    | Clostridia   | 0                   | 0                    | 0                   | 0                    |
| <b>seq1237</b> | Firmicutes    | Clostridia   | 0                   | 0                    | 0                   | 0                    |
| <b>seq1312</b> | Firmicutes    | Clostridia   | 0                   | 0                    | 0                   | 0                    |

Sequence Count Table

|                | <b>Phylum</b> | <b>Class</b> | <b>Subject13WK0</b> | <b>Subject13WK12</b> | <b>Subject39WK0</b> | <b>Subject39WK12</b> |
|----------------|---------------|--------------|---------------------|----------------------|---------------------|----------------------|
| <b>seq1588</b> | Firmicutes    | Clostridia   | 0                   | 0                    | 0                   | 0                    |
| <b>seq1701</b> | Firmicutes    | Clostridia   | 0                   | 0                    | 0                   | 0                    |
| <b>seq1702</b> | Firmicutes    | Clostridia   | 0                   | 0                    | 0                   | 0                    |
| <b>seq1877</b> | Firmicutes    | Clostridia   | 0                   | 0                    | 0                   | 0                    |
| <b>seq1806</b> | Firmicutes    | Clostridia   | 0                   | 0                    | 0                   | 0                    |
| <b>seq142</b>  | Firmicutes    | Clostridia   | 2511                | 25                   | 0                   | 14                   |
| <b>seq327</b>  | Firmicutes    | Clostridia   | 0                   | 0                    | 0                   | 0                    |
| <b>seq710</b>  | Firmicutes    | Clostridia   | 0                   | 0                    | 0                   | 0                    |
| <b>seq721</b>  | Firmicutes    | Clostridia   | 0                   | 0                    | 0                   | 0                    |
| <b>seq839</b>  | Firmicutes    | Clostridia   | 0                   | 0                    | 0                   | 0                    |
| <b>seq842</b>  | Firmicutes    | Clostridia   | 230                 | 0                    | 0                   | 0                    |
| <b>seq866</b>  | Firmicutes    | Clostridia   | 101                 | 0                    | 0                   | 0                    |
| <b>seq924</b>  | Firmicutes    | Clostridia   | 181                 | 0                    | 0                   | 0                    |
| <b>seq1018</b> | Firmicutes    | Clostridia   | 137                 | 0                    | 0                   | 0                    |
| <b>seq1063</b> | Firmicutes    | Clostridia   | 0                   | 0                    | 0                   | 0                    |
| <b>seq1260</b> | Firmicutes    | Clostridia   | 0                   | 0                    | 0                   | 0                    |
| <b>seq1874</b> | Firmicutes    | Clostridia   | 0                   | 0                    | 0                   | 0                    |
| <b>seq1155</b> | Firmicutes    | Clostridia   | 0                   | 0                    | 0                   | 0                    |
| <b>seq159</b>  | Firmicutes    | Clostridia   | 99                  | 128                  | 0                   | 0                    |
| <b>seq301</b>  | Firmicutes    | Clostridia   | 234                 | 410                  | 0                   | 0                    |
| <b>seq599</b>  | Firmicutes    | Clostridia   | 58                  | 38                   | 0                   | 0                    |
| <b>seq679</b>  | Firmicutes    | Clostridia   | 11                  | 15                   | 0                   | 0                    |
| <b>seq692</b>  | Firmicutes    | Clostridia   | 0                   | 0                    | 0                   | 0                    |
| <b>seq748</b>  | Firmicutes    | Clostridia   | 0                   | 0                    | 0                   | 0                    |
| <b>seq777</b>  | Firmicutes    | Clostridia   | 0                   | 0                    | 0                   | 0                    |
| <b>seq972</b>  | Firmicutes    | Clostridia   | 52                  | 0                    | 0                   | 0                    |
| <b>seq1008</b> | Firmicutes    | Clostridia   | 0                   | 0                    | 0                   | 0                    |
| <b>seq1045</b> | Firmicutes    | Clostridia   | 0                   | 0                    | 0                   | 0                    |
| <b>seq1083</b> | Firmicutes    | Clostridia   | 0                   | 0                    | 0                   | 0                    |
| <b>seq1106</b> | Firmicutes    | Clostridia   | 13                  | 56                   | 0                   | 0                    |
| <b>seq1237</b> | Firmicutes    | Clostridia   | 71                  | 0                    | 0                   | 0                    |
| <b>seq1312</b> | Firmicutes    | Clostridia   | 0                   | 0                    | 0                   | 0                    |

Sequence Count Table

|                | <b>Phylum</b> | <b>Class</b> | <b>Subject26WK0</b> | <b>Subject26WK12</b> | <b>Subject14WK0</b> | <b>Subject14WK12</b> |
|----------------|---------------|--------------|---------------------|----------------------|---------------------|----------------------|
| <b>seq1588</b> | Firmicutes    | Clostridia   | 0                   | 0                    | 0                   | 0                    |
| <b>seq1701</b> | Firmicutes    | Clostridia   | 0                   | 0                    | 0                   | 0                    |
| <b>seq1702</b> | Firmicutes    | Clostridia   | 0                   | 0                    | 0                   | 0                    |
| <b>seq1877</b> | Firmicutes    | Clostridia   | 0                   | 0                    | 0                   | 0                    |
| <b>seq1806</b> | Firmicutes    | Clostridia   | 0                   | 0                    | 0                   | 0                    |
| <b>seq142</b>  | Firmicutes    | Clostridia   | 24                  | 0                    | 151                 | 166                  |
| <b>seq327</b>  | Firmicutes    | Clostridia   | 0                   | 0                    | 39                  | 0                    |
| <b>seq710</b>  | Firmicutes    | Clostridia   | 0                   | 0                    | 0                   | 0                    |
| <b>seq721</b>  | Firmicutes    | Clostridia   | 0                   | 0                    | 0                   | 0                    |
| <b>seq839</b>  | Firmicutes    | Clostridia   | 0                   | 0                    | 0                   | 0                    |
| <b>seq842</b>  | Firmicutes    | Clostridia   | 0                   | 0                    | 0                   | 0                    |
| <b>seq866</b>  | Firmicutes    | Clostridia   | 0                   | 0                    | 0                   | 0                    |
| <b>seq924</b>  | Firmicutes    | Clostridia   | 0                   | 0                    | 0                   | 0                    |
| <b>seq1018</b> | Firmicutes    | Clostridia   | 0                   | 0                    | 0                   | 0                    |
| <b>seq1063</b> | Firmicutes    | Clostridia   | 0                   | 0                    | 18                  | 0                    |
| <b>seq1260</b> | Firmicutes    | Clostridia   | 0                   | 0                    | 0                   | 0                    |
| <b>seq1874</b> | Firmicutes    | Clostridia   | 0                   | 0                    | 0                   | 0                    |
| <b>seq1155</b> | Firmicutes    | Clostridia   | 0                   | 0                    | 0                   | 0                    |
| <b>seq159</b>  | Firmicutes    | Clostridia   | 0                   | 0                    | 0                   | 0                    |
| <b>seq301</b>  | Firmicutes    | Clostridia   | 0                   | 0                    | 0                   | 0                    |
| <b>seq599</b>  | Firmicutes    | Clostridia   | 0                   | 0                    | 0                   | 0                    |
| <b>seq679</b>  | Firmicutes    | Clostridia   | 0                   | 0                    | 10                  | 12                   |
| <b>seq692</b>  | Firmicutes    | Clostridia   | 0                   | 0                    | 57                  | 37                   |
| <b>seq748</b>  | Firmicutes    | Clostridia   | 0                   | 0                    | 0                   | 0                    |
| <b>seq777</b>  | Firmicutes    | Clostridia   | 0                   | 0                    | 0                   | 46                   |
| <b>seq972</b>  | Firmicutes    | Clostridia   | 0                   | 0                    | 0                   | 0                    |
| <b>seq1008</b> | Firmicutes    | Clostridia   | 0                   | 0                    | 0                   | 0                    |
| <b>seq1045</b> | Firmicutes    | Clostridia   | 0                   | 0                    | 0                   | 0                    |
| <b>seq1083</b> | Firmicutes    | Clostridia   | 0                   | 0                    | 0                   | 0                    |
| <b>seq1106</b> | Firmicutes    | Clostridia   | 0                   | 0                    | 0                   | 0                    |
| <b>seq1237</b> | Firmicutes    | Clostridia   | 0                   | 0                    | 0                   | 0                    |
| <b>seq1312</b> | Firmicutes    | Clostridia   | 0                   | 0                    | 0                   | 0                    |

Sequence Count Table

|                | <b>Phylum</b> | <b>Class</b> | <b>Subject27WK0</b> | <b>Subject27WK12</b> | <b>Subject15WK0</b> | <b>Subject15WK12</b> |
|----------------|---------------|--------------|---------------------|----------------------|---------------------|----------------------|
| <b>seq1588</b> | Firmicutes    | Clostridia   | 0                   | 21                   | 0                   | 0                    |
| <b>seq1701</b> | Firmicutes    | Clostridia   | 0                   | 0                    | 0                   | 0                    |
| <b>seq1702</b> | Firmicutes    | Clostridia   | 0                   | 0                    | 0                   | 0                    |
| <b>seq1877</b> | Firmicutes    | Clostridia   | 0                   | 0                    | 0                   | 0                    |
| <b>seq1806</b> | Firmicutes    | Clostridia   | 0                   | 0                    | 0                   | 0                    |
| <b>seq142</b>  | Firmicutes    | Clostridia   | 0                   | 139                  | 114                 | 1339                 |
| <b>seq327</b>  | Firmicutes    | Clostridia   | 0                   | 0                    | 330                 | 176                  |
| <b>seq710</b>  | Firmicutes    | Clostridia   | 0                   | 0                    | 0                   | 0                    |
| <b>seq721</b>  | Firmicutes    | Clostridia   | 0                   | 0                    | 0                   | 0                    |
| <b>seq839</b>  | Firmicutes    | Clostridia   | 0                   | 0                    | 0                   | 0                    |
| <b>seq842</b>  | Firmicutes    | Clostridia   | 0                   | 0                    | 0                   | 0                    |
| <b>seq866</b>  | Firmicutes    | Clostridia   | 8                   | 0                    | 0                   | 0                    |
| <b>seq924</b>  | Firmicutes    | Clostridia   | 0                   | 0                    | 0                   | 0                    |
| <b>seq1018</b> | Firmicutes    | Clostridia   | 0                   | 0                    | 0                   | 0                    |
| <b>seq1063</b> | Firmicutes    | Clostridia   | 0                   | 0                    | 0                   | 24                   |
| <b>seq1260</b> | Firmicutes    | Clostridia   | 0                   | 0                    | 0                   | 0                    |
| <b>seq1874</b> | Firmicutes    | Clostridia   | 0                   | 0                    | 0                   | 0                    |
| <b>seq1155</b> | Firmicutes    | Clostridia   | 0                   | 0                    | 0                   | 0                    |
| <b>seq159</b>  | Firmicutes    | Clostridia   | 0                   | 0                    | 0                   | 0                    |
| <b>seq301</b>  | Firmicutes    | Clostridia   | 0                   | 0                    | 0                   | 0                    |
| <b>seq599</b>  | Firmicutes    | Clostridia   | 0                   | 0                    | 0                   | 0                    |
| <b>seq679</b>  | Firmicutes    | Clostridia   | 0                   | 0                    | 0                   | 0                    |
| <b>seq692</b>  | Firmicutes    | Clostridia   | 0                   | 0                    | 0                   | 0                    |
| <b>seq748</b>  | Firmicutes    | Clostridia   | 0                   | 0                    | 0                   | 0                    |
| <b>seq777</b>  | Firmicutes    | Clostridia   | 0                   | 0                    | 0                   | 0                    |
| <b>seq972</b>  | Firmicutes    | Clostridia   | 0                   | 0                    | 0                   | 0                    |
| <b>seq1008</b> | Firmicutes    | Clostridia   | 0                   | 0                    | 0                   | 0                    |
| <b>seq1045</b> | Firmicutes    | Clostridia   | 0                   | 0                    | 0                   | 0                    |
| <b>seq1083</b> | Firmicutes    | Clostridia   | 0                   | 0                    | 0                   | 0                    |
| <b>seq1106</b> | Firmicutes    | Clostridia   | 0                   | 0                    | 0                   | 0                    |
| <b>seq1237</b> | Firmicutes    | Clostridia   | 0                   | 0                    | 0                   | 0                    |
| <b>seq1312</b> | Firmicutes    | Clostridia   | 0                   | 0                    | 0                   | 0                    |

Sequence Count Table

|                | <b>Phylum</b> | <b>Class</b> | <b>Δ</b> |  |  |  |
|----------------|---------------|--------------|----------|--|--|--|
| <b>seq1588</b> | Firmicutes    | Clostridia   |          |  |  |  |
| <b>seq1701</b> | Firmicutes    | Clostridia   |          |  |  |  |
| <b>seq1702</b> | Firmicutes    | Clostridia   |          |  |  |  |
| <b>seq1877</b> | Firmicutes    | Clostridia   |          |  |  |  |
| <b>seq1806</b> | Firmicutes    | Clostridia   |          |  |  |  |
| <b>seq142</b>  | Firmicutes    | Clostridia   |          |  |  |  |
| <b>seq327</b>  | Firmicutes    | Clostridia   |          |  |  |  |
| <b>seq710</b>  | Firmicutes    | Clostridia   |          |  |  |  |
| <b>seq721</b>  | Firmicutes    | Clostridia   |          |  |  |  |
| <b>seq839</b>  | Firmicutes    | Clostridia   |          |  |  |  |
| <b>seq842</b>  | Firmicutes    | Clostridia   |          |  |  |  |
| <b>seq866</b>  | Firmicutes    | Clostridia   |          |  |  |  |
| <b>seq924</b>  | Firmicutes    | Clostridia   |          |  |  |  |
| <b>seq1018</b> | Firmicutes    | Clostridia   |          |  |  |  |
| <b>seq1063</b> | Firmicutes    | Clostridia   |          |  |  |  |
| <b>seq1260</b> | Firmicutes    | Clostridia   |          |  |  |  |
| <b>seq1874</b> | Firmicutes    | Clostridia   |          |  |  |  |
| <b>seq1155</b> | Firmicutes    | Clostridia   |          |  |  |  |
| <b>seq159</b>  | Firmicutes    | Clostridia   |          |  |  |  |
| <b>seq301</b>  | Firmicutes    | Clostridia   |          |  |  |  |
| <b>seq599</b>  | Firmicutes    | Clostridia   |          |  |  |  |
| <b>seq679</b>  | Firmicutes    | Clostridia   |          |  |  |  |
| <b>seq692</b>  | Firmicutes    | Clostridia   |          |  |  |  |
| <b>seq748</b>  | Firmicutes    | Clostridia   |          |  |  |  |
| <b>seq777</b>  | Firmicutes    | Clostridia   |          |  |  |  |
| <b>seq972</b>  | Firmicutes    | Clostridia   |          |  |  |  |
| <b>seq1008</b> | Firmicutes    | Clostridia   |          |  |  |  |
| <b>seq1045</b> | Firmicutes    | Clostridia   |          |  |  |  |
| <b>seq1083</b> | Firmicutes    | Clostridia   |          |  |  |  |
| <b>seq1106</b> | Firmicutes    | Clostridia   |          |  |  |  |
| <b>seq1237</b> | Firmicutes    | Clostridia   |          |  |  |  |
| <b>seq1312</b> | Firmicutes    | Clostridia   |          |  |  |  |

Sequence Count Table

|                | <b>Phylum</b> | <b>Class</b>     | <b>Order</b>       | <b>Family</b>                 |
|----------------|---------------|------------------|--------------------|-------------------------------|
| <b>seq1341</b> | Firmicutes    | Clostridia       | Clostridiales      | Clostridiales_vadinBB60_group |
| <b>seq1353</b> | Firmicutes    | Clostridia       | Clostridiales      | Clostridiales_vadinBB60_group |
| <b>seq1362</b> | Firmicutes    | Clostridia       | Clostridiales      | Clostridiales_vadinBB60_group |
| <b>seq1403</b> | Firmicutes    | Clostridia       | Clostridiales      | Clostridiales_vadinBB60_group |
| <b>seq1477</b> | Firmicutes    | Clostridia       | Clostridiales      | Clostridiales_vadinBB60_group |
| <b>seq1510</b> | Firmicutes    | Clostridia       | Clostridiales      | Clostridiales_vadinBB60_group |
| <b>seq1524</b> | Firmicutes    | Clostridia       | Clostridiales      | Clostridiales_vadinBB60_group |
| <b>seq1564</b> | Firmicutes    | Clostridia       | Clostridiales      | Clostridiales_vadinBB60_group |
| <b>seq1578</b> | Firmicutes    | Clostridia       | Clostridiales      | Clostridiales_vadinBB60_group |
| <b>seq1636</b> | Firmicutes    | Clostridia       | Clostridiales      | Clostridiales_vadinBB60_group |
| <b>seq1652</b> | Firmicutes    | Clostridia       | Clostridiales      | Clostridiales_vadinBB60_group |
| <b>seq1672</b> | Firmicutes    | Clostridia       | Clostridiales      | Clostridiales_vadinBB60_group |
| <b>seq1689</b> | Firmicutes    | Clostridia       | Clostridiales      | Clostridiales_vadinBB60_group |
| <b>seq1716</b> | Firmicutes    | Clostridia       | Clostridiales      | Clostridiales_vadinBB60_group |
| <b>seq1735</b> | Firmicutes    | Clostridia       | Clostridiales      | Clostridiales_vadinBB60_group |
| <b>seq1839</b> | Firmicutes    | Clostridia       | Clostridiales      | Clostridiales_vadinBB60_group |
| <b>seq1869</b> | Firmicutes    | Clostridia       | Clostridiales      | Clostridiales_vadinBB60_group |
| <b>seq938</b>  | Firmicutes    | Clostridia       | Clostridiales      | Defluviitaleaceae             |
| <b>seq1060</b> | Firmicutes    | Clostridia       | Clostridiales      | Defluviitaleaceae             |
| <b>seq1367</b> | Firmicutes    | Clostridia       | Clostridiales      | Defluviitaleaceae             |
| <b>seq1454</b> | Firmicutes    | Clostridia       | Clostridiales      | Defluviitaleaceae             |
| <b>seq1693</b> | Firmicutes    | Clostridia       | Clostridiales      | Defluviitaleaceae             |
| <b>seq1229</b> | Firmicutes    | Bacilli          | Lactobacillales    | Enterococcaceae               |
| <b>seq1326</b> | Firmicutes    | Bacilli          | Lactobacillales    | Enterococcaceae               |
| <b>seq353</b>  | Firmicutes    | Erysipelotrichia | Erysipelotrichales | Erysipelotrichaceae           |
| <b>seq732</b>  | Firmicutes    | Erysipelotrichia | Erysipelotrichales | Erysipelotrichaceae           |
| <b>seq1407</b> | Firmicutes    | Erysipelotrichia | Erysipelotrichales | Erysipelotrichaceae           |
| <b>seq45</b>   | Firmicutes    | Erysipelotrichia | Erysipelotrichales | Erysipelotrichaceae           |
| <b>seq362</b>  | Firmicutes    | Erysipelotrichia | Erysipelotrichales | Erysipelotrichaceae           |
| <b>seq744</b>  | Firmicutes    | Erysipelotrichia | Erysipelotrichales | Erysipelotrichaceae           |
| <b>seq882</b>  | Firmicutes    | Erysipelotrichia | Erysipelotrichales | Erysipelotrichaceae           |
| <b>seq666</b>  | Firmicutes    | Erysipelotrichia | Erysipelotrichales | Erysipelotrichaceae           |

Sequence Count Table

|                | <b>Phylum</b> | <b>Class</b>     | <b>Genus</b>              | <b>Species</b> |
|----------------|---------------|------------------|---------------------------|----------------|
| <b>seq1341</b> | Firmicutes    | Clostridia       |                           |                |
| <b>seq1353</b> | Firmicutes    | Clostridia       |                           |                |
| <b>seq1362</b> | Firmicutes    | Clostridia       |                           |                |
| <b>seq1403</b> | Firmicutes    | Clostridia       |                           |                |
| <b>seq1477</b> | Firmicutes    | Clostridia       |                           |                |
| <b>seq1510</b> | Firmicutes    | Clostridia       |                           |                |
| <b>seq1524</b> | Firmicutes    | Clostridia       |                           |                |
| <b>seq1564</b> | Firmicutes    | Clostridia       |                           |                |
| <b>seq1578</b> | Firmicutes    | Clostridia       |                           |                |
| <b>seq1636</b> | Firmicutes    | Clostridia       |                           |                |
| <b>seq1652</b> | Firmicutes    | Clostridia       |                           |                |
| <b>seq1672</b> | Firmicutes    | Clostridia       |                           |                |
| <b>seq1689</b> | Firmicutes    | Clostridia       |                           |                |
| <b>seq1716</b> | Firmicutes    | Clostridia       |                           |                |
| <b>seq1735</b> | Firmicutes    | Clostridia       |                           |                |
| <b>seq1839</b> | Firmicutes    | Clostridia       |                           |                |
| <b>seq1869</b> | Firmicutes    | Clostridia       |                           |                |
| <b>seq938</b>  | Firmicutes    | Clostridia       | Defluviitaleaceae_UCG-011 |                |
| <b>seq1060</b> | Firmicutes    | Clostridia       | Defluviitaleaceae_UCG-011 |                |
| <b>seq1367</b> | Firmicutes    | Clostridia       | Defluviitaleaceae_UCG-011 |                |
| <b>seq1454</b> | Firmicutes    | Clostridia       | Defluviitaleaceae_UCG-011 |                |
| <b>seq1693</b> | Firmicutes    | Clostridia       |                           |                |
| <b>seq1229</b> | Firmicutes    | Bacilli          | Enterococcus              |                |
| <b>seq1326</b> | Firmicutes    | Bacilli          | Enterococcus              |                |
| <b>seq353</b>  | Firmicutes    | Erysipelotrichia | Candidatus_Stoquefichus   |                |
| <b>seq732</b>  | Firmicutes    | Erysipelotrichia | Candidatus_Stoquefichus   |                |
| <b>seq1407</b> | Firmicutes    | Erysipelotrichia | Candidatus_Stoquefichus   |                |
| <b>seq45</b>   | Firmicutes    | Erysipelotrichia | Catenibacterium           | mitsuokai      |
| <b>seq362</b>  | Firmicutes    | Erysipelotrichia | Catenibacterium           |                |
| <b>seq744</b>  | Firmicutes    | Erysipelotrichia | Catenibacterium           |                |
| <b>seq882</b>  | Firmicutes    | Erysipelotrichia | Catenibacterium           |                |
| <b>seq666</b>  | Firmicutes    | Erysipelotrichia | Coprobacillus             | cateniformis   |

Sequence Count Table

|                | <b>Phylum</b> | <b>Class</b>     | <b>Subject34WK0</b> | <b>Subject34WK12</b> | <b>Subject16WK0</b> | <b>Subject16WK12</b> |
|----------------|---------------|------------------|---------------------|----------------------|---------------------|----------------------|
| <b>seq1341</b> | Firmicutes    | Clostridia       | 0                   | 0                    | 0                   | 0                    |
| <b>seq1353</b> | Firmicutes    | Clostridia       | 0                   | 0                    | 0                   | 0                    |
| <b>seq1362</b> | Firmicutes    | Clostridia       | 0                   | 0                    | 0                   | 0                    |
| <b>seq1403</b> | Firmicutes    | Clostridia       | 0                   | 0                    | 0                   | 0                    |
| <b>seq1477</b> | Firmicutes    | Clostridia       | 0                   | 0                    | 0                   | 0                    |
| <b>seq1510</b> | Firmicutes    | Clostridia       | 0                   | 0                    | 5                   | 22                   |
| <b>seq1524</b> | Firmicutes    | Clostridia       | 0                   | 0                    | 0                   | 0                    |
| <b>seq1564</b> | Firmicutes    | Clostridia       | 0                   | 0                    | 0                   | 0                    |
| <b>seq1578</b> | Firmicutes    | Clostridia       | 0                   | 0                    | 0                   | 0                    |
| <b>seq1636</b> | Firmicutes    | Clostridia       | 0                   | 0                    | 0                   | 0                    |
| <b>seq1652</b> | Firmicutes    | Clostridia       | 0                   | 0                    | 0                   | 0                    |
| <b>seq1672</b> | Firmicutes    | Clostridia       | 0                   | 0                    | 0                   | 0                    |
| <b>seq1689</b> | Firmicutes    | Clostridia       | 0                   | 0                    | 0                   | 0                    |
| <b>seq1716</b> | Firmicutes    | Clostridia       | 0                   | 0                    | 0                   | 0                    |
| <b>seq1735</b> | Firmicutes    | Clostridia       | 0                   | 0                    | 0                   | 0                    |
| <b>seq1839</b> | Firmicutes    | Clostridia       | 0                   | 0                    | 0                   | 0                    |
| <b>seq1869</b> | Firmicutes    | Clostridia       | 0                   | 0                    | 0                   | 0                    |
| <b>seq938</b>  | Firmicutes    | Clostridia       | 0                   | 0                    | 0                   | 0                    |
| <b>seq1060</b> | Firmicutes    | Clostridia       | 0                   | 0                    | 0                   | 0                    |
| <b>seq1367</b> | Firmicutes    | Clostridia       | 0                   | 0                    | 0                   | 0                    |
| <b>seq1454</b> | Firmicutes    | Clostridia       | 0                   | 0                    | 8                   | 7                    |
| <b>seq1693</b> | Firmicutes    | Clostridia       | 0                   | 0                    | 0                   | 0                    |
| <b>seq1229</b> | Firmicutes    | Bacilli          | 0                   | 0                    | 0                   | 0                    |
| <b>seq1326</b> | Firmicutes    | Bacilli          | 0                   | 0                    | 0                   | 0                    |
| <b>seq353</b>  | Firmicutes    | Erysipelotrichia | 0                   | 0                    | 0                   | 0                    |
| <b>seq732</b>  | Firmicutes    | Erysipelotrichia | 0                   | 0                    | 0                   | 0                    |
| <b>seq1407</b> | Firmicutes    | Erysipelotrichia | 0                   | 0                    | 0                   | 0                    |
| <b>seq45</b>   | Firmicutes    | Erysipelotrichia | 0                   | 0                    | 2917                | 7216                 |
| <b>seq362</b>  | Firmicutes    | Erysipelotrichia | 0                   | 0                    | 0                   | 0                    |
| <b>seq744</b>  | Firmicutes    | Erysipelotrichia | 0                   | 0                    | 0                   | 0                    |
| <b>seq882</b>  | Firmicutes    | Erysipelotrichia | 0                   | 0                    | 0                   | 0                    |
| <b>seq666</b>  | Firmicutes    | Erysipelotrichia | 0                   | 0                    | 0                   | 0                    |



Sequence Count Table

|                | <b>Phylum</b> | <b>Class</b>     | <b>Subject17WK0</b> | <b>Subject17WK12</b> | <b>Subject1WK0</b> | <b>Subject1WK12</b> |
|----------------|---------------|------------------|---------------------|----------------------|--------------------|---------------------|
| <b>seq1341</b> | Firmicutes    | Clostridia       | 0                   | 0                    | 0                  | 0                   |
| <b>seq1353</b> | Firmicutes    | Clostridia       | 0                   | 0                    | 0                  | 0                   |
| <b>seq1362</b> | Firmicutes    | Clostridia       | 0                   | 0                    | 0                  | 0                   |
| <b>seq1403</b> | Firmicutes    | Clostridia       | 0                   | 0                    | 0                  | 0                   |
| <b>seq1477</b> | Firmicutes    | Clostridia       | 0                   | 0                    | 0                  | 0                   |
| <b>seq1510</b> | Firmicutes    | Clostridia       | 0                   | 0                    | 0                  | 0                   |
| <b>seq1524</b> | Firmicutes    | Clostridia       | 0                   | 0                    | 0                  | 0                   |
| <b>seq1564</b> | Firmicutes    | Clostridia       | 0                   | 0                    | 0                  | 0                   |
| <b>seq1578</b> | Firmicutes    | Clostridia       | 0                   | 0                    | 0                  | 0                   |
| <b>seq1636</b> | Firmicutes    | Clostridia       | 0                   | 0                    | 0                  | 0                   |
| <b>seq1652</b> | Firmicutes    | Clostridia       | 0                   | 0                    | 0                  | 0                   |
| <b>seq1672</b> | Firmicutes    | Clostridia       | 0                   | 0                    | 0                  | 14                  |
| <b>seq1689</b> | Firmicutes    | Clostridia       | 0                   | 0                    | 0                  | 0                   |
| <b>seq1716</b> | Firmicutes    | Clostridia       | 0                   | 0                    | 0                  | 0                   |
| <b>seq1735</b> | Firmicutes    | Clostridia       | 0                   | 0                    | 0                  | 0                   |
| <b>seq1839</b> | Firmicutes    | Clostridia       | 0                   | 0                    | 0                  | 0                   |
| <b>seq1869</b> | Firmicutes    | Clostridia       | 0                   | 0                    | 0                  | 0                   |
| <b>seq938</b>  | Firmicutes    | Clostridia       | 0                   | 0                    | 0                  | 0                   |
| <b>seq1060</b> | Firmicutes    | Clostridia       | 0                   | 0                    | 0                  | 0                   |
| <b>seq1367</b> | Firmicutes    | Clostridia       | 0                   | 0                    | 0                  | 0                   |
| <b>seq1454</b> | Firmicutes    | Clostridia       | 0                   | 0                    | 0                  | 0                   |
| <b>seq1693</b> | Firmicutes    | Clostridia       | 0                   | 0                    | 0                  | 0                   |
| <b>seq1229</b> | Firmicutes    | Bacilli          | 0                   | 0                    | 0                  | 0                   |
| <b>seq1326</b> | Firmicutes    | Bacilli          | 0                   | 0                    | 0                  | 0                   |
| <b>seq353</b>  | Firmicutes    | Erysipelotrichia | 0                   | 0                    | 0                  | 0                   |
| <b>seq732</b>  | Firmicutes    | Erysipelotrichia | 0                   | 0                    | 0                  | 0                   |
| <b>seq1407</b> | Firmicutes    | Erysipelotrichia | 0                   | 0                    | 0                  | 0                   |
| <b>seq45</b>   | Firmicutes    | Erysipelotrichia | 914                 | 356                  | 0                  | 0                   |
| <b>seq362</b>  | Firmicutes    | Erysipelotrichia | 0                   | 0                    | 0                  | 0                   |
| <b>seq744</b>  | Firmicutes    | Erysipelotrichia | 0                   | 0                    | 0                  | 0                   |
| <b>seq882</b>  | Firmicutes    | Erysipelotrichia | 0                   | 0                    | 0                  | 0                   |
| <b>seq666</b>  | Firmicutes    | Erysipelotrichia | 0                   | 0                    | 0                  | 0                   |

Sequence Count Table

|                | <b>Phylum</b> | <b>Class</b>     | <b>Subject2WK0</b> | <b>Subject2WK12</b> | <b>Subject3WK0</b> | <b>Subject3WK12</b> |
|----------------|---------------|------------------|--------------------|---------------------|--------------------|---------------------|
| <b>seq1341</b> | Firmicutes    | Clostridia       | 0                  | 0                   | 0                  | 0                   |
| <b>seq1353</b> | Firmicutes    | Clostridia       | 0                  | 0                   | 0                  | 0                   |
| <b>seq1362</b> | Firmicutes    | Clostridia       | 0                  | 0                   | 0                  | 0                   |
| <b>seq1403</b> | Firmicutes    | Clostridia       | 0                  | 0                   | 0                  | 0                   |
| <b>seq1477</b> | Firmicutes    | Clostridia       | 0                  | 0                   | 0                  | 0                   |
| <b>seq1510</b> | Firmicutes    | Clostridia       | 0                  | 0                   | 0                  | 0                   |
| <b>seq1524</b> | Firmicutes    | Clostridia       | 0                  | 0                   | 0                  | 0                   |
| <b>seq1564</b> | Firmicutes    | Clostridia       | 0                  | 0                   | 0                  | 0                   |
| <b>seq1578</b> | Firmicutes    | Clostridia       | 0                  | 0                   | 0                  | 0                   |
| <b>seq1636</b> | Firmicutes    | Clostridia       | 0                  | 0                   | 0                  | 0                   |
| <b>seq1652</b> | Firmicutes    | Clostridia       | 0                  | 0                   | 0                  | 0                   |
| <b>seq1672</b> | Firmicutes    | Clostridia       | 0                  | 0                   | 0                  | 0                   |
| <b>seq1689</b> | Firmicutes    | Clostridia       | 0                  | 0                   | 0                  | 0                   |
| <b>seq1716</b> | Firmicutes    | Clostridia       | 0                  | 0                   | 0                  | 0                   |
| <b>seq1735</b> | Firmicutes    | Clostridia       | 0                  | 0                   | 0                  | 0                   |
| <b>seq1839</b> | Firmicutes    | Clostridia       | 0                  | 0                   | 0                  | 0                   |
| <b>seq1869</b> | Firmicutes    | Clostridia       | 0                  | 0                   | 0                  | 0                   |
| <b>seq938</b>  | Firmicutes    | Clostridia       | 0                  | 0                   | 0                  | 0                   |
| <b>seq1060</b> | Firmicutes    | Clostridia       | 0                  | 0                   | 0                  | 0                   |
| <b>seq1367</b> | Firmicutes    | Clostridia       | 0                  | 0                   | 0                  | 0                   |
| <b>seq1454</b> | Firmicutes    | Clostridia       | 0                  | 0                   | 0                  | 0                   |
| <b>seq1693</b> | Firmicutes    | Clostridia       | 0                  | 0                   | 0                  | 0                   |
| <b>seq1229</b> | Firmicutes    | Bacilli          | 0                  | 0                   | 0                  | 0                   |
| <b>seq1326</b> | Firmicutes    | Bacilli          | 0                  | 0                   | 0                  | 0                   |
| <b>seq353</b>  | Firmicutes    | Erysipelotrichia | 0                  | 0                   | 0                  | 0                   |
| <b>seq732</b>  | Firmicutes    | Erysipelotrichia | 0                  | 0                   | 0                  | 0                   |
| <b>seq1407</b> | Firmicutes    | Erysipelotrichia | 0                  | 0                   | 0                  | 0                   |
| <b>seq45</b>   | Firmicutes    | Erysipelotrichia | 0                  | 0                   | 0                  | 0                   |
| <b>seq362</b>  | Firmicutes    | Erysipelotrichia | 0                  | 0                   | 0                  | 0                   |
| <b>seq744</b>  | Firmicutes    | Erysipelotrichia | 0                  | 0                   | 0                  | 0                   |
| <b>seq882</b>  | Firmicutes    | Erysipelotrichia | 0                  | 0                   | 0                  | 0                   |
| <b>seq666</b>  | Firmicutes    | Erysipelotrichia | 0                  | 0                   | 10                 | 0                   |

Sequence Count Table

|                | <b>Phylum</b> | <b>Class</b>     | <b>Subject4WK0</b> | <b>Subject4WK12</b> | <b>Subject5WK0</b> | <b>Subject5WK12</b> |
|----------------|---------------|------------------|--------------------|---------------------|--------------------|---------------------|
| <b>seq1341</b> | Firmicutes    | Clostridia       | 0                  | 0                   | 0                  | 0                   |
| <b>seq1353</b> | Firmicutes    | Clostridia       | 0                  | 0                   | 0                  | 0                   |
| <b>seq1362</b> | Firmicutes    | Clostridia       | 0                  | 0                   | 0                  | 0                   |
| <b>seq1403</b> | Firmicutes    | Clostridia       | 0                  | 0                   | 0                  | 0                   |
| <b>seq1477</b> | Firmicutes    | Clostridia       | 0                  | 0                   | 0                  | 0                   |
| <b>seq1510</b> | Firmicutes    | Clostridia       | 0                  | 0                   | 0                  | 0                   |
| <b>seq1524</b> | Firmicutes    | Clostridia       | 0                  | 0                   | 0                  | 0                   |
| <b>seq1564</b> | Firmicutes    | Clostridia       | 0                  | 0                   | 0                  | 0                   |
| <b>seq1578</b> | Firmicutes    | Clostridia       | 0                  | 21                  | 0                  | 0                   |
| <b>seq1636</b> | Firmicutes    | Clostridia       | 0                  | 0                   | 0                  | 0                   |
| <b>seq1652</b> | Firmicutes    | Clostridia       | 0                  | 0                   | 0                  | 0                   |
| <b>seq1672</b> | Firmicutes    | Clostridia       | 0                  | 0                   | 0                  | 0                   |
| <b>seq1689</b> | Firmicutes    | Clostridia       | 13                 | 0                   | 0                  | 0                   |
| <b>seq1716</b> | Firmicutes    | Clostridia       | 0                  | 0                   | 0                  | 0                   |
| <b>seq1735</b> | Firmicutes    | Clostridia       | 0                  | 0                   | 0                  | 0                   |
| <b>seq1839</b> | Firmicutes    | Clostridia       | 0                  | 0                   | 0                  | 0                   |
| <b>seq1869</b> | Firmicutes    | Clostridia       | 0                  | 0                   | 0                  | 0                   |
| <b>seq938</b>  | Firmicutes    | Clostridia       | 28                 | 15                  | 6                  | 0                   |
| <b>seq1060</b> | Firmicutes    | Clostridia       | 0                  | 0                   | 0                  | 0                   |
| <b>seq1367</b> | Firmicutes    | Clostridia       | 0                  | 0                   | 0                  | 0                   |
| <b>seq1454</b> | Firmicutes    | Clostridia       | 0                  | 0                   | 0                  | 0                   |
| <b>seq1693</b> | Firmicutes    | Clostridia       | 0                  | 0                   | 0                  | 0                   |
| <b>seq1229</b> | Firmicutes    | Bacilli          | 0                  | 0                   | 0                  | 0                   |
| <b>seq1326</b> | Firmicutes    | Bacilli          | 0                  | 0                   | 0                  | 0                   |
| <b>seq353</b>  | Firmicutes    | Erysipelotrichia | 39                 | 18                  | 22                 | 96                  |
| <b>seq732</b>  | Firmicutes    | Erysipelotrichia | 0                  | 0                   | 0                  | 0                   |
| <b>seq1407</b> | Firmicutes    | Erysipelotrichia | 0                  | 0                   | 0                  | 0                   |
| <b>seq45</b>   | Firmicutes    | Erysipelotrichia | 0                  | 0                   | 0                  | 0                   |
| <b>seq362</b>  | Firmicutes    | Erysipelotrichia | 0                  | 0                   | 0                  | 0                   |
| <b>seq744</b>  | Firmicutes    | Erysipelotrichia | 0                  | 0                   | 0                  | 0                   |
| <b>seq882</b>  | Firmicutes    | Erysipelotrichia | 0                  | 0                   | 0                  | 0                   |
| <b>seq666</b>  | Firmicutes    | Erysipelotrichia | 0                  | 0                   | 0                  | 59                  |

Sequence Count Table

|                | <b>Phylum</b> | <b>Class</b>     | <b>Subject6WK0</b> | <b>Subject6WK12</b> | <b>Subject18WK0</b> | <b>Subject18WK12</b> |
|----------------|---------------|------------------|--------------------|---------------------|---------------------|----------------------|
| <b>seq1341</b> | Firmicutes    | Clostridia       | 0                  | 7                   | 0                   | 0                    |
| <b>seq1353</b> | Firmicutes    | Clostridia       | 0                  | 0                   | 0                   | 0                    |
| <b>seq1362</b> | Firmicutes    | Clostridia       | 0                  | 0                   | 0                   | 0                    |
| <b>seq1403</b> | Firmicutes    | Clostridia       | 0                  | 0                   | 0                   | 0                    |
| <b>seq1477</b> | Firmicutes    | Clostridia       | 0                  | 0                   | 0                   | 0                    |
| <b>seq1510</b> | Firmicutes    | Clostridia       | 0                  | 0                   | 0                   | 0                    |
| <b>seq1524</b> | Firmicutes    | Clostridia       | 14                 | 12                  | 0                   | 0                    |
| <b>seq1564</b> | Firmicutes    | Clostridia       | 0                  | 22                  | 0                   | 0                    |
| <b>seq1578</b> | Firmicutes    | Clostridia       | 0                  | 0                   | 0                   | 0                    |
| <b>seq1636</b> | Firmicutes    | Clostridia       | 0                  | 0                   | 0                   | 0                    |
| <b>seq1652</b> | Firmicutes    | Clostridia       | 0                  | 0                   | 0                   | 0                    |
| <b>seq1672</b> | Firmicutes    | Clostridia       | 0                  | 0                   | 0                   | 0                    |
| <b>seq1689</b> | Firmicutes    | Clostridia       | 0                  | 0                   | 0                   | 0                    |
| <b>seq1716</b> | Firmicutes    | Clostridia       | 0                  | 0                   | 0                   | 0                    |
| <b>seq1735</b> | Firmicutes    | Clostridia       | 0                  | 0                   | 0                   | 0                    |
| <b>seq1839</b> | Firmicutes    | Clostridia       | 0                  | 0                   | 0                   | 0                    |
| <b>seq1869</b> | Firmicutes    | Clostridia       | 0                  | 0                   | 0                   | 0                    |
| <b>seq938</b>  | Firmicutes    | Clostridia       | 0                  | 0                   | 0                   | 0                    |
| <b>seq1060</b> | Firmicutes    | Clostridia       | 0                  | 0                   | 0                   | 0                    |
| <b>seq1367</b> | Firmicutes    | Clostridia       | 0                  | 0                   | 0                   | 0                    |
| <b>seq1454</b> | Firmicutes    | Clostridia       | 18                 | 0                   | 0                   | 0                    |
| <b>seq1693</b> | Firmicutes    | Clostridia       | 0                  | 13                  | 0                   | 0                    |
| <b>seq1229</b> | Firmicutes    | Bacilli          | 0                  | 0                   | 0                   | 0                    |
| <b>seq1326</b> | Firmicutes    | Bacilli          | 0                  | 0                   | 0                   | 0                    |
| <b>seq353</b>  | Firmicutes    | Erysipelotrichia | 0                  | 0                   | 127                 | 16                   |
| <b>seq732</b>  | Firmicutes    | Erysipelotrichia | 0                  | 0                   | 168                 | 0                    |
| <b>seq1407</b> | Firmicutes    | Erysipelotrichia | 0                  | 0                   | 0                   | 0                    |
| <b>seq45</b>   | Firmicutes    | Erysipelotrichia | 0                  | 0                   | 0                   | 0                    |
| <b>seq362</b>  | Firmicutes    | Erysipelotrichia | 0                  | 0                   | 0                   | 0                    |
| <b>seq744</b>  | Firmicutes    | Erysipelotrichia | 0                  | 0                   | 0                   | 0                    |
| <b>seq882</b>  | Firmicutes    | Erysipelotrichia | 0                  | 0                   | 0                   | 0                    |
| <b>seq666</b>  | Firmicutes    | Erysipelotrichia | 0                  | 0                   | 0                   | 16                   |

Sequence Count Table

|                | <b>Phylum</b> | <b>Class</b>     | <b>Subject19WK0</b> | <b>Subject19WK12</b> | <b>Subject20WK0</b> | <b>Subject20WK12</b> |
|----------------|---------------|------------------|---------------------|----------------------|---------------------|----------------------|
| <b>seq1341</b> | Firmicutes    | Clostridia       | 0                   | 0                    | 0                   | 0                    |
| <b>seq1353</b> | Firmicutes    | Clostridia       | 0                   | 0                    | 0                   | 0                    |
| <b>seq1362</b> | Firmicutes    | Clostridia       | 0                   | 0                    | 0                   | 0                    |
| <b>seq1403</b> | Firmicutes    | Clostridia       | 0                   | 0                    | 0                   | 0                    |
| <b>seq1477</b> | Firmicutes    | Clostridia       | 0                   | 0                    | 0                   | 0                    |
| <b>seq1510</b> | Firmicutes    | Clostridia       | 0                   | 0                    | 0                   | 0                    |
| <b>seq1524</b> | Firmicutes    | Clostridia       | 0                   | 0                    | 0                   | 0                    |
| <b>seq1564</b> | Firmicutes    | Clostridia       | 0                   | 0                    | 0                   | 0                    |
| <b>seq1578</b> | Firmicutes    | Clostridia       | 0                   | 0                    | 0                   | 0                    |
| <b>seq1636</b> | Firmicutes    | Clostridia       | 0                   | 0                    | 0                   | 0                    |
| <b>seq1652</b> | Firmicutes    | Clostridia       | 0                   | 0                    | 0                   | 0                    |
| <b>seq1672</b> | Firmicutes    | Clostridia       | 0                   | 0                    | 0                   | 0                    |
| <b>seq1689</b> | Firmicutes    | Clostridia       | 0                   | 0                    | 0                   | 0                    |
| <b>seq1716</b> | Firmicutes    | Clostridia       | 0                   | 0                    | 0                   | 0                    |
| <b>seq1735</b> | Firmicutes    | Clostridia       | 0                   | 0                    | 0                   | 0                    |
| <b>seq1839</b> | Firmicutes    | Clostridia       | 0                   | 0                    | 0                   | 0                    |
| <b>seq1869</b> | Firmicutes    | Clostridia       | 0                   | 0                    | 0                   | 0                    |
| <b>seq938</b>  | Firmicutes    | Clostridia       | 0                   | 0                    | 0                   | 0                    |
| <b>seq1060</b> | Firmicutes    | Clostridia       | 0                   | 0                    | 0                   | 0                    |
| <b>seq1367</b> | Firmicutes    | Clostridia       | 0                   | 0                    | 0                   | 0                    |
| <b>seq1454</b> | Firmicutes    | Clostridia       | 0                   | 0                    | 0                   | 0                    |
| <b>seq1693</b> | Firmicutes    | Clostridia       | 0                   | 0                    | 0                   | 0                    |
| <b>seq1229</b> | Firmicutes    | Bacilli          | 0                   | 0                    | 0                   | 0                    |
| <b>seq1326</b> | Firmicutes    | Bacilli          | 0                   | 0                    | 0                   | 0                    |
| <b>seq353</b>  | Firmicutes    | Erysipelotrichia | 0                   | 0                    | 0                   | 0                    |
| <b>seq732</b>  | Firmicutes    | Erysipelotrichia | 0                   | 0                    | 0                   | 0                    |
| <b>seq1407</b> | Firmicutes    | Erysipelotrichia | 11                  | 29                   | 0                   | 0                    |
| <b>seq45</b>   | Firmicutes    | Erysipelotrichia | 0                   | 0                    | 536                 | 576                  |
| <b>seq362</b>  | Firmicutes    | Erysipelotrichia | 0                   | 0                    | 0                   | 0                    |
| <b>seq744</b>  | Firmicutes    | Erysipelotrichia | 0                   | 0                    | 0                   | 0                    |
| <b>seq882</b>  | Firmicutes    | Erysipelotrichia | 0                   | 0                    | 0                   | 0                    |
| <b>seq666</b>  | Firmicutes    | Erysipelotrichia | 0                   | 0                    | 0                   | 0                    |

Sequence Count Table

|                | <b>Phylum</b> | <b>Class</b>     | <b>Subject7WK0</b> | <b>Subject7WK12</b> | <b>Subject21WK0</b> | <b>Subject21WK12</b> |
|----------------|---------------|------------------|--------------------|---------------------|---------------------|----------------------|
| <b>seq1341</b> | Firmicutes    | Clostridia       | 0                  | 0                   | 0                   | 0                    |
| <b>seq1353</b> | Firmicutes    | Clostridia       | 0                  | 0                   | 0                   | 0                    |
| <b>seq1362</b> | Firmicutes    | Clostridia       | 0                  | 0                   | 0                   | 0                    |
| <b>seq1403</b> | Firmicutes    | Clostridia       | 0                  | 0                   | 0                   | 0                    |
| <b>seq1477</b> | Firmicutes    | Clostridia       | 0                  | 0                   | 0                   | 0                    |
| <b>seq1510</b> | Firmicutes    | Clostridia       | 0                  | 0                   | 0                   | 0                    |
| <b>seq1524</b> | Firmicutes    | Clostridia       | 0                  | 0                   | 0                   | 0                    |
| <b>seq1564</b> | Firmicutes    | Clostridia       | 0                  | 0                   | 0                   | 0                    |
| <b>seq1578</b> | Firmicutes    | Clostridia       | 0                  | 0                   | 0                   | 0                    |
| <b>seq1636</b> | Firmicutes    | Clostridia       | 0                  | 0                   | 0                   | 0                    |
| <b>seq1652</b> | Firmicutes    | Clostridia       | 0                  | 0                   | 0                   | 0                    |
| <b>seq1672</b> | Firmicutes    | Clostridia       | 0                  | 0                   | 0                   | 0                    |
| <b>seq1689</b> | Firmicutes    | Clostridia       | 0                  | 0                   | 0                   | 0                    |
| <b>seq1716</b> | Firmicutes    | Clostridia       | 0                  | 0                   | 0                   | 0                    |
| <b>seq1735</b> | Firmicutes    | Clostridia       | 0                  | 0                   | 0                   | 0                    |
| <b>seq1839</b> | Firmicutes    | Clostridia       | 0                  | 0                   | 0                   | 0                    |
| <b>seq1869</b> | Firmicutes    | Clostridia       | 0                  | 0                   | 0                   | 0                    |
| <b>seq938</b>  | Firmicutes    | Clostridia       | 0                  | 0                   | 0                   | 0                    |
| <b>seq1060</b> | Firmicutes    | Clostridia       | 0                  | 0                   | 0                   | 0                    |
| <b>seq1367</b> | Firmicutes    | Clostridia       | 0                  | 0                   | 0                   | 0                    |
| <b>seq1454</b> | Firmicutes    | Clostridia       | 0                  | 0                   | 0                   | 0                    |
| <b>seq1693</b> | Firmicutes    | Clostridia       | 0                  | 0                   | 0                   | 0                    |
| <b>seq1229</b> | Firmicutes    | Bacilli          | 0                  | 0                   | 44                  | 28                   |
| <b>seq1326</b> | Firmicutes    | Bacilli          | 0                  | 0                   | 0                   | 0                    |
| <b>seq353</b>  | Firmicutes    | Erysipelotrichia | 0                  | 0                   | 343                 | 736                  |
| <b>seq732</b>  | Firmicutes    | Erysipelotrichia | 0                  | 0                   | 0                   | 166                  |
| <b>seq1407</b> | Firmicutes    | Erysipelotrichia | 0                  | 0                   | 0                   | 0                    |
| <b>seq45</b>   | Firmicutes    | Erysipelotrichia | 0                  | 0                   | 13010               | 7775                 |
| <b>seq362</b>  | Firmicutes    | Erysipelotrichia | 0                  | 0                   | 0                   | 0                    |
| <b>seq744</b>  | Firmicutes    | Erysipelotrichia | 0                  | 0                   | 0                   | 0                    |
| <b>seq882</b>  | Firmicutes    | Erysipelotrichia | 0                  | 0                   | 0                   | 0                    |
| <b>seq666</b>  | Firmicutes    | Erysipelotrichia | 0                  | 0                   | 0                   | 0                    |

Sequence Count Table

|                | <b>Phylum</b> | <b>Class</b>     | <b>Subject8WK0</b> | <b>Subject8WK12</b> | <b>Subject9WK0</b> | <b>Subject9WK12</b> |
|----------------|---------------|------------------|--------------------|---------------------|--------------------|---------------------|
| <b>seq1341</b> | Firmicutes    | Clostridia       | 0                  | 0                   | 0                  | 0                   |
| <b>seq1353</b> | Firmicutes    | Clostridia       | 0                  | 0                   | 0                  | 0                   |
| <b>seq1362</b> | Firmicutes    | Clostridia       | 0                  | 0                   | 0                  | 0                   |
| <b>seq1403</b> | Firmicutes    | Clostridia       | 0                  | 0                   | 0                  | 0                   |
| <b>seq1477</b> | Firmicutes    | Clostridia       | 0                  | 0                   | 0                  | 0                   |
| <b>seq1510</b> | Firmicutes    | Clostridia       | 0                  | 0                   | 0                  | 0                   |
| <b>seq1524</b> | Firmicutes    | Clostridia       | 0                  | 0                   | 0                  | 0                   |
| <b>seq1564</b> | Firmicutes    | Clostridia       | 0                  | 0                   | 0                  | 0                   |
| <b>seq1578</b> | Firmicutes    | Clostridia       | 0                  | 0                   | 0                  | 0                   |
| <b>seq1636</b> | Firmicutes    | Clostridia       | 0                  | 0                   | 0                  | 0                   |
| <b>seq1652</b> | Firmicutes    | Clostridia       | 0                  | 0                   | 0                  | 0                   |
| <b>seq1672</b> | Firmicutes    | Clostridia       | 0                  | 0                   | 0                  | 0                   |
| <b>seq1689</b> | Firmicutes    | Clostridia       | 0                  | 0                   | 0                  | 0                   |
| <b>seq1716</b> | Firmicutes    | Clostridia       | 0                  | 0                   | 0                  | 0                   |
| <b>seq1735</b> | Firmicutes    | Clostridia       | 0                  | 0                   | 0                  | 0                   |
| <b>seq1839</b> | Firmicutes    | Clostridia       | 0                  | 0                   | 0                  | 0                   |
| <b>seq1869</b> | Firmicutes    | Clostridia       | 0                  | 0                   | 0                  | 0                   |
| <b>seq938</b>  | Firmicutes    | Clostridia       | 71                 | 13                  | 38                 | 0                   |
| <b>seq1060</b> | Firmicutes    | Clostridia       | 0                  | 0                   | 0                  | 0                   |
| <b>seq1367</b> | Firmicutes    | Clostridia       | 0                  | 0                   | 0                  | 0                   |
| <b>seq1454</b> | Firmicutes    | Clostridia       | 0                  | 0                   | 0                  | 0                   |
| <b>seq1693</b> | Firmicutes    | Clostridia       | 0                  | 0                   | 0                  | 0                   |
| <b>seq1229</b> | Firmicutes    | Bacilli          | 0                  | 0                   | 0                  | 0                   |
| <b>seq1326</b> | Firmicutes    | Bacilli          | 0                  | 0                   | 0                  | 0                   |
| <b>seq353</b>  | Firmicutes    | Erysipelotrichia | 0                  | 0                   | 0                  | 0                   |
| <b>seq732</b>  | Firmicutes    | Erysipelotrichia | 0                  | 0                   | 0                  | 0                   |
| <b>seq1407</b> | Firmicutes    | Erysipelotrichia | 0                  | 0                   | 0                  | 0                   |
| <b>seq45</b>   | Firmicutes    | Erysipelotrichia | 0                  | 0                   | 0                  | 0                   |
| <b>seq362</b>  | Firmicutes    | Erysipelotrichia | 0                  | 0                   | 0                  | 0                   |
| <b>seq744</b>  | Firmicutes    | Erysipelotrichia | 0                  | 0                   | 0                  | 0                   |
| <b>seq882</b>  | Firmicutes    | Erysipelotrichia | 0                  | 0                   | 0                  | 0                   |
| <b>seq666</b>  | Firmicutes    | Erysipelotrichia | 0                  | 0                   | 0                  | 0                   |

Sequence Count Table

|                | <b>Phylum</b> | <b>Class</b>     | <b>Subject10WK0</b> | <b>Subject10WK12</b> | <b>Subject22WK0</b> | <b>Subject22WK12</b> |
|----------------|---------------|------------------|---------------------|----------------------|---------------------|----------------------|
| <b>seq1341</b> | Firmicutes    | Clostridia       | 0                   | 0                    | 0                   | 0                    |
| <b>seq1353</b> | Firmicutes    | Clostridia       | 0                   | 0                    | 0                   | 0                    |
| <b>seq1362</b> | Firmicutes    | Clostridia       | 0                   | 0                    | 0                   | 0                    |
| <b>seq1403</b> | Firmicutes    | Clostridia       | 0                   | 0                    | 0                   | 0                    |
| <b>seq1477</b> | Firmicutes    | Clostridia       | 0                   | 0                    | 16                  | 15                   |
| <b>seq1510</b> | Firmicutes    | Clostridia       | 0                   | 0                    | 0                   | 0                    |
| <b>seq1524</b> | Firmicutes    | Clostridia       | 0                   | 0                    | 0                   | 0                    |
| <b>seq1564</b> | Firmicutes    | Clostridia       | 0                   | 0                    | 0                   | 0                    |
| <b>seq1578</b> | Firmicutes    | Clostridia       | 0                   | 0                    | 0                   | 0                    |
| <b>seq1636</b> | Firmicutes    | Clostridia       | 0                   | 0                    | 0                   | 9                    |
| <b>seq1652</b> | Firmicutes    | Clostridia       | 0                   | 0                    | 0                   | 0                    |
| <b>seq1672</b> | Firmicutes    | Clostridia       | 0                   | 0                    | 0                   | 0                    |
| <b>seq1689</b> | Firmicutes    | Clostridia       | 0                   | 0                    | 0                   | 0                    |
| <b>seq1716</b> | Firmicutes    | Clostridia       | 0                   | 0                    | 0                   | 12                   |
| <b>seq1735</b> | Firmicutes    | Clostridia       | 0                   | 0                    | 0                   | 0                    |
| <b>seq1839</b> | Firmicutes    | Clostridia       | 0                   | 0                    | 0                   | 0                    |
| <b>seq1869</b> | Firmicutes    | Clostridia       | 0                   | 0                    | 0                   | 0                    |
| <b>seq938</b>  | Firmicutes    | Clostridia       | 0                   | 0                    | 0                   | 0                    |
| <b>seq1060</b> | Firmicutes    | Clostridia       | 0                   | 0                    | 0                   | 0                    |
| <b>seq1367</b> | Firmicutes    | Clostridia       | 0                   | 0                    | 20                  | 26                   |
| <b>seq1454</b> | Firmicutes    | Clostridia       | 0                   | 0                    | 0                   | 0                    |
| <b>seq1693</b> | Firmicutes    | Clostridia       | 0                   | 0                    | 0                   | 0                    |
| <b>seq1229</b> | Firmicutes    | Bacilli          | 0                   | 0                    | 0                   | 0                    |
| <b>seq1326</b> | Firmicutes    | Bacilli          | 0                   | 0                    | 0                   | 0                    |
| <b>seq353</b>  | Firmicutes    | Erysipelotrichia | 0                   | 0                    | 0                   | 0                    |
| <b>seq732</b>  | Firmicutes    | Erysipelotrichia | 0                   | 0                    | 0                   | 0                    |
| <b>seq1407</b> | Firmicutes    | Erysipelotrichia | 0                   | 0                    | 0                   | 0                    |
| <b>seq45</b>   | Firmicutes    | Erysipelotrichia | 0                   | 0                    | 197                 | 364                  |
| <b>seq362</b>  | Firmicutes    | Erysipelotrichia | 0                   | 0                    | 0                   | 0                    |
| <b>seq744</b>  | Firmicutes    | Erysipelotrichia | 0                   | 0                    | 0                   | 0                    |
| <b>seq882</b>  | Firmicutes    | Erysipelotrichia | 0                   | 0                    | 0                   | 0                    |
| <b>seq666</b>  | Firmicutes    | Erysipelotrichia | 0                   | 0                    | 39                  | 0                    |



Sequence Count Table

|                | <b>Phylum</b> | <b>Class</b>     | <b>Subject23WK0</b> | <b>Subject23WK12</b> | <b>Subject24WK0</b> | <b>Subject24WK12</b> |
|----------------|---------------|------------------|---------------------|----------------------|---------------------|----------------------|
| <b>seq1341</b> | Firmicutes    | Clostridia       | 0                   | 0                    | 0                   | 0                    |
| <b>seq1353</b> | Firmicutes    | Clostridia       | 0                   | 0                    | 0                   | 0                    |
| <b>seq1362</b> | Firmicutes    | Clostridia       | 0                   | 0                    | 0                   | 0                    |
| <b>seq1403</b> | Firmicutes    | Clostridia       | 0                   | 0                    | 0                   | 0                    |
| <b>seq1477</b> | Firmicutes    | Clostridia       | 0                   | 0                    | 0                   | 0                    |
| <b>seq1510</b> | Firmicutes    | Clostridia       | 0                   | 0                    | 0                   | 0                    |
| <b>seq1524</b> | Firmicutes    | Clostridia       | 0                   | 0                    | 0                   | 0                    |
| <b>seq1564</b> | Firmicutes    | Clostridia       | 0                   | 0                    | 0                   | 0                    |
| <b>seq1578</b> | Firmicutes    | Clostridia       | 0                   | 0                    | 0                   | 0                    |
| <b>seq1636</b> | Firmicutes    | Clostridia       | 0                   | 0                    | 0                   | 0                    |
| <b>seq1652</b> | Firmicutes    | Clostridia       | 0                   | 0                    | 0                   | 0                    |
| <b>seq1672</b> | Firmicutes    | Clostridia       | 0                   | 0                    | 0                   | 0                    |
| <b>seq1689</b> | Firmicutes    | Clostridia       | 0                   | 0                    | 0                   | 0                    |
| <b>seq1716</b> | Firmicutes    | Clostridia       | 0                   | 0                    | 0                   | 0                    |
| <b>seq1735</b> | Firmicutes    | Clostridia       | 0                   | 0                    | 0                   | 0                    |
| <b>seq1839</b> | Firmicutes    | Clostridia       | 0                   | 0                    | 0                   | 0                    |
| <b>seq1869</b> | Firmicutes    | Clostridia       | 0                   | 0                    | 0                   | 0                    |
| <b>seq938</b>  | Firmicutes    | Clostridia       | 0                   | 0                    | 0                   | 0                    |
| <b>seq1060</b> | Firmicutes    | Clostridia       | 0                   | 0                    | 0                   | 0                    |
| <b>seq1367</b> | Firmicutes    | Clostridia       | 0                   | 0                    | 0                   | 0                    |
| <b>seq1454</b> | Firmicutes    | Clostridia       | 0                   | 0                    | 0                   | 0                    |
| <b>seq1693</b> | Firmicutes    | Clostridia       | 0                   | 0                    | 0                   | 0                    |
| <b>seq1229</b> | Firmicutes    | Bacilli          | 0                   | 0                    | 0                   | 0                    |
| <b>seq1326</b> | Firmicutes    | Bacilli          | 0                   | 0                    | 30                  | 22                   |
| <b>seq353</b>  | Firmicutes    | Erysipelotrichia | 0                   | 0                    | 0                   | 0                    |
| <b>seq732</b>  | Firmicutes    | Erysipelotrichia | 0                   | 0                    | 0                   | 0                    |
| <b>seq1407</b> | Firmicutes    | Erysipelotrichia | 0                   | 0                    | 0                   | 0                    |
| <b>seq45</b>   | Firmicutes    | Erysipelotrichia | 442                 | 840                  | 0                   | 0                    |
| <b>seq362</b>  | Firmicutes    | Erysipelotrichia | 0                   | 0                    | 0                   | 0                    |
| <b>seq744</b>  | Firmicutes    | Erysipelotrichia | 0                   | 0                    | 0                   | 0                    |
| <b>seq882</b>  | Firmicutes    | Erysipelotrichia | 0                   | 0                    | 0                   | 0                    |
| <b>seq666</b>  | Firmicutes    | Erysipelotrichia | 0                   | 0                    | 0                   | 0                    |

Sequence Count Table

|                | <b>Phylum</b> | <b>Class</b>     | <b>Subject11WK0</b> | <b>Subject11WK12</b> | <b>Subject12WK0</b> | <b>Subject12WK12</b> |
|----------------|---------------|------------------|---------------------|----------------------|---------------------|----------------------|
| <b>seq1341</b> | Firmicutes    | Clostridia       | 0                   | 0                    | 0                   | 0                    |
| <b>seq1353</b> | Firmicutes    | Clostridia       | 0                   | 0                    | 0                   | 0                    |
| <b>seq1362</b> | Firmicutes    | Clostridia       | 0                   | 0                    | 0                   | 0                    |
| <b>seq1403</b> | Firmicutes    | Clostridia       | 0                   | 0                    | 0                   | 0                    |
| <b>seq1477</b> | Firmicutes    | Clostridia       | 0                   | 0                    | 0                   | 0                    |
| <b>seq1510</b> | Firmicutes    | Clostridia       | 0                   | 0                    | 0                   | 0                    |
| <b>seq1524</b> | Firmicutes    | Clostridia       | 0                   | 0                    | 0                   | 0                    |
| <b>seq1564</b> | Firmicutes    | Clostridia       | 0                   | 0                    | 0                   | 0                    |
| <b>seq1578</b> | Firmicutes    | Clostridia       | 0                   | 0                    | 0                   | 0                    |
| <b>seq1636</b> | Firmicutes    | Clostridia       | 0                   | 0                    | 0                   | 0                    |
| <b>seq1652</b> | Firmicutes    | Clostridia       | 0                   | 0                    | 0                   | 0                    |
| <b>seq1672</b> | Firmicutes    | Clostridia       | 0                   | 0                    | 0                   | 0                    |
| <b>seq1689</b> | Firmicutes    | Clostridia       | 0                   | 0                    | 0                   | 0                    |
| <b>seq1716</b> | Firmicutes    | Clostridia       | 0                   | 0                    | 0                   | 0                    |
| <b>seq1735</b> | Firmicutes    | Clostridia       | 0                   | 0                    | 0                   | 0                    |
| <b>seq1839</b> | Firmicutes    | Clostridia       | 0                   | 0                    | 0                   | 0                    |
| <b>seq1869</b> | Firmicutes    | Clostridia       | 0                   | 0                    | 0                   | 0                    |
| <b>seq938</b>  | Firmicutes    | Clostridia       | 0                   | 0                    | 0                   | 0                    |
| <b>seq1060</b> | Firmicutes    | Clostridia       | 0                   | 0                    | 0                   | 0                    |
| <b>seq1367</b> | Firmicutes    | Clostridia       | 0                   | 0                    | 0                   | 0                    |
| <b>seq1454</b> | Firmicutes    | Clostridia       | 0                   | 0                    | 0                   | 0                    |
| <b>seq1693</b> | Firmicutes    | Clostridia       | 0                   | 0                    | 0                   | 0                    |
| <b>seq1229</b> | Firmicutes    | Bacilli          | 0                   | 0                    | 0                   | 0                    |
| <b>seq1326</b> | Firmicutes    | Bacilli          | 0                   | 0                    | 0                   | 0                    |
| <b>seq353</b>  | Firmicutes    | Erysipelotrichia | 0                   | 0                    | 0                   | 0                    |
| <b>seq732</b>  | Firmicutes    | Erysipelotrichia | 0                   | 0                    | 0                   | 0                    |
| <b>seq1407</b> | Firmicutes    | Erysipelotrichia | 0                   | 0                    | 0                   | 0                    |
| <b>seq45</b>   | Firmicutes    | Erysipelotrichia | 0                   | 0                    | 1736                | 4310                 |
| <b>seq362</b>  | Firmicutes    | Erysipelotrichia | 0                   | 0                    | 427                 | 1065                 |
| <b>seq744</b>  | Firmicutes    | Erysipelotrichia | 0                   | 0                    | 0                   | 323                  |
| <b>seq882</b>  | Firmicutes    | Erysipelotrichia | 0                   | 0                    | 0                   | 0                    |
| <b>seq666</b>  | Firmicutes    | Erysipelotrichia | 199                 | 0                    | 0                   | 0                    |

Sequence Count Table

|                | <b>Phylum</b> | <b>Class</b>     | <b>Subject25WK0</b> | <b>Subject25WK12</b> | <b>Subject38WK0</b> | <b>Subject38WK12</b> |
|----------------|---------------|------------------|---------------------|----------------------|---------------------|----------------------|
| <b>seq1341</b> | Firmicutes    | Clostridia       | 43                  | 0                    | 0                   | 0                    |
| <b>seq1353</b> | Firmicutes    | Clostridia       | 0                   | 0                    | 0                   | 0                    |
| <b>seq1362</b> | Firmicutes    | Clostridia       | 0                   | 0                    | 0                   | 0                    |
| <b>seq1403</b> | Firmicutes    | Clostridia       | 0                   | 0                    | 0                   | 0                    |
| <b>seq1477</b> | Firmicutes    | Clostridia       | 0                   | 0                    | 0                   | 0                    |
| <b>seq1510</b> | Firmicutes    | Clostridia       | 0                   | 0                    | 0                   | 0                    |
| <b>seq1524</b> | Firmicutes    | Clostridia       | 0                   | 0                    | 0                   | 0                    |
| <b>seq1564</b> | Firmicutes    | Clostridia       | 0                   | 0                    | 0                   | 0                    |
| <b>seq1578</b> | Firmicutes    | Clostridia       | 0                   | 0                    | 0                   | 0                    |
| <b>seq1636</b> | Firmicutes    | Clostridia       | 0                   | 0                    | 0                   | 0                    |
| <b>seq1652</b> | Firmicutes    | Clostridia       | 0                   | 0                    | 0                   | 0                    |
| <b>seq1672</b> | Firmicutes    | Clostridia       | 0                   | 0                    | 0                   | 0                    |
| <b>seq1689</b> | Firmicutes    | Clostridia       | 0                   | 0                    | 0                   | 0                    |
| <b>seq1716</b> | Firmicutes    | Clostridia       | 0                   | 0                    | 0                   | 0                    |
| <b>seq1735</b> | Firmicutes    | Clostridia       | 0                   | 0                    | 0                   | 0                    |
| <b>seq1839</b> | Firmicutes    | Clostridia       | 0                   | 0                    | 0                   | 0                    |
| <b>seq1869</b> | Firmicutes    | Clostridia       | 0                   | 0                    | 0                   | 0                    |
| <b>seq938</b>  | Firmicutes    | Clostridia       | 0                   | 0                    | 0                   | 0                    |
| <b>seq1060</b> | Firmicutes    | Clostridia       | 12                  | 0                    | 0                   | 0                    |
| <b>seq1367</b> | Firmicutes    | Clostridia       | 0                   | 0                    | 0                   | 0                    |
| <b>seq1454</b> | Firmicutes    | Clostridia       | 0                   | 0                    | 0                   | 0                    |
| <b>seq1693</b> | Firmicutes    | Clostridia       | 0                   | 0                    | 0                   | 0                    |
| <b>seq1229</b> | Firmicutes    | Bacilli          | 0                   | 0                    | 0                   | 0                    |
| <b>seq1326</b> | Firmicutes    | Bacilli          | 0                   | 0                    | 0                   | 0                    |
| <b>seq353</b>  | Firmicutes    | Erysipelotrichia | 0                   | 0                    | 0                   | 0                    |
| <b>seq732</b>  | Firmicutes    | Erysipelotrichia | 0                   | 0                    | 0                   | 0                    |
| <b>seq1407</b> | Firmicutes    | Erysipelotrichia | 0                   | 0                    | 0                   | 0                    |
| <b>seq45</b>   | Firmicutes    | Erysipelotrichia | 0                   | 0                    | 0                   | 0                    |
| <b>seq362</b>  | Firmicutes    | Erysipelotrichia | 0                   | 0                    | 0                   | 0                    |
| <b>seq744</b>  | Firmicutes    | Erysipelotrichia | 0                   | 0                    | 0                   | 0                    |
| <b>seq882</b>  | Firmicutes    | Erysipelotrichia | 0                   | 0                    | 0                   | 0                    |
| <b>seq666</b>  | Firmicutes    | Erysipelotrichia | 0                   | 67                   | 0                   | 0                    |

Sequence Count Table

|                | <b>Phylum</b> | <b>Class</b>     | <b>Subject31WK0</b> | <b>Subject31WK12</b> | <b>Subject32WK0</b> | <b>Subject32WK12</b> |
|----------------|---------------|------------------|---------------------|----------------------|---------------------|----------------------|
| <b>seq1341</b> | Firmicutes    | Clostridia       | 0                   | 0                    | 0                   | 0                    |
| <b>seq1353</b> | Firmicutes    | Clostridia       | 0                   | 0                    | 0                   | 0                    |
| <b>seq1362</b> | Firmicutes    | Clostridia       | 0                   | 0                    | 0                   | 0                    |
| <b>seq1403</b> | Firmicutes    | Clostridia       | 0                   | 0                    | 0                   | 0                    |
| <b>seq1477</b> | Firmicutes    | Clostridia       | 0                   | 0                    | 0                   | 0                    |
| <b>seq1510</b> | Firmicutes    | Clostridia       | 0                   | 0                    | 0                   | 0                    |
| <b>seq1524</b> | Firmicutes    | Clostridia       | 0                   | 0                    | 0                   | 0                    |
| <b>seq1564</b> | Firmicutes    | Clostridia       | 0                   | 0                    | 0                   | 0                    |
| <b>seq1578</b> | Firmicutes    | Clostridia       | 0                   | 0                    | 0                   | 0                    |
| <b>seq1636</b> | Firmicutes    | Clostridia       | 0                   | 0                    | 0                   | 0                    |
| <b>seq1652</b> | Firmicutes    | Clostridia       | 0                   | 0                    | 0                   | 0                    |
| <b>seq1672</b> | Firmicutes    | Clostridia       | 0                   | 0                    | 0                   | 0                    |
| <b>seq1689</b> | Firmicutes    | Clostridia       | 0                   | 0                    | 0                   | 0                    |
| <b>seq1716</b> | Firmicutes    | Clostridia       | 0                   | 0                    | 0                   | 0                    |
| <b>seq1735</b> | Firmicutes    | Clostridia       | 0                   | 0                    | 0                   | 0                    |
| <b>seq1839</b> | Firmicutes    | Clostridia       | 0                   | 0                    | 0                   | 0                    |
| <b>seq1869</b> | Firmicutes    | Clostridia       | 0                   | 0                    | 0                   | 0                    |
| <b>seq938</b>  | Firmicutes    | Clostridia       | 0                   | 0                    | 0                   | 0                    |
| <b>seq1060</b> | Firmicutes    | Clostridia       | 0                   | 0                    | 0                   | 0                    |
| <b>seq1367</b> | Firmicutes    | Clostridia       | 0                   | 0                    | 0                   | 0                    |
| <b>seq1454</b> | Firmicutes    | Clostridia       | 0                   | 0                    | 0                   | 0                    |
| <b>seq1693</b> | Firmicutes    | Clostridia       | 0                   | 0                    | 0                   | 0                    |
| <b>seq1229</b> | Firmicutes    | Bacilli          | 0                   | 0                    | 0                   | 0                    |
| <b>seq1326</b> | Firmicutes    | Bacilli          | 0                   | 0                    | 0                   | 0                    |
| <b>seq353</b>  | Firmicutes    | Erysipelotrichia | 0                   | 0                    | 0                   | 0                    |
| <b>seq732</b>  | Firmicutes    | Erysipelotrichia | 0                   | 0                    | 0                   | 0                    |
| <b>seq1407</b> | Firmicutes    | Erysipelotrichia | 0                   | 0                    | 0                   | 0                    |
| <b>seq45</b>   | Firmicutes    | Erysipelotrichia | 0                   | 0                    | 0                   | 0                    |
| <b>seq362</b>  | Firmicutes    | Erysipelotrichia | 0                   | 0                    | 0                   | 0                    |
| <b>seq744</b>  | Firmicutes    | Erysipelotrichia | 0                   | 0                    | 0                   | 0                    |
| <b>seq882</b>  | Firmicutes    | Erysipelotrichia | 0                   | 0                    | 0                   | 0                    |
| <b>seq666</b>  | Firmicutes    | Erysipelotrichia | 0                   | 0                    | 0                   | 0                    |

Sequence Count Table

|                | <b>Phylum</b> | <b>Class</b>     | <b>Subject13WK0</b> | <b>Subject13WK12</b> | <b>Subject39WK0</b> | <b>Subject39WK12</b> |
|----------------|---------------|------------------|---------------------|----------------------|---------------------|----------------------|
| <b>seq1341</b> | Firmicutes    | Clostridia       | 0                   | 0                    | 0                   | 0                    |
| <b>seq1353</b> | Firmicutes    | Clostridia       | 0                   | 0                    | 0                   | 0                    |
| <b>seq1362</b> | Firmicutes    | Clostridia       | 0                   | 0                    | 0                   | 0                    |
| <b>seq1403</b> | Firmicutes    | Clostridia       | 41                  | 0                    | 0                   | 0                    |
| <b>seq1477</b> | Firmicutes    | Clostridia       | 0                   | 0                    | 0                   | 0                    |
| <b>seq1510</b> | Firmicutes    | Clostridia       | 0                   | 0                    | 0                   | 0                    |
| <b>seq1524</b> | Firmicutes    | Clostridia       | 0                   | 0                    | 0                   | 0                    |
| <b>seq1564</b> | Firmicutes    | Clostridia       | 0                   | 0                    | 0                   | 0                    |
| <b>seq1578</b> | Firmicutes    | Clostridia       | 0                   | 0                    | 0                   | 0                    |
| <b>seq1636</b> | Firmicutes    | Clostridia       | 8                   | 0                    | 0                   | 0                    |
| <b>seq1652</b> | Firmicutes    | Clostridia       | 0                   | 16                   | 0                   | 0                    |
| <b>seq1672</b> | Firmicutes    | Clostridia       | 0                   | 0                    | 0                   | 0                    |
| <b>seq1689</b> | Firmicutes    | Clostridia       | 0                   | 0                    | 0                   | 0                    |
| <b>seq1716</b> | Firmicutes    | Clostridia       | 0                   | 0                    | 0                   | 0                    |
| <b>seq1735</b> | Firmicutes    | Clostridia       | 11                  | 0                    | 0                   | 0                    |
| <b>seq1839</b> | Firmicutes    | Clostridia       | 0                   | 6                    | 0                   | 0                    |
| <b>seq1869</b> | Firmicutes    | Clostridia       | 5                   | 0                    | 0                   | 0                    |
| <b>seq938</b>  | Firmicutes    | Clostridia       | 0                   | 0                    | 0                   | 0                    |
| <b>seq1060</b> | Firmicutes    | Clostridia       | 66                  | 43                   | 0                   | 0                    |
| <b>seq1367</b> | Firmicutes    | Clostridia       | 0                   | 0                    | 0                   | 0                    |
| <b>seq1454</b> | Firmicutes    | Clostridia       | 0                   | 0                    | 0                   | 0                    |
| <b>seq1693</b> | Firmicutes    | Clostridia       | 0                   | 0                    | 0                   | 0                    |
| <b>seq1229</b> | Firmicutes    | Bacilli          | 0                   | 0                    | 0                   | 0                    |
| <b>seq1326</b> | Firmicutes    | Bacilli          | 0                   | 0                    | 0                   | 0                    |
| <b>seq353</b>  | Firmicutes    | Erysipelotrichia | 0                   | 0                    | 0                   | 0                    |
| <b>seq732</b>  | Firmicutes    | Erysipelotrichia | 0                   | 0                    | 0                   | 0                    |
| <b>seq1407</b> | Firmicutes    | Erysipelotrichia | 0                   | 0                    | 0                   | 0                    |
| <b>seq45</b>   | Firmicutes    | Erysipelotrichia | 805                 | 0                    | 0                   | 0                    |
| <b>seq362</b>  | Firmicutes    | Erysipelotrichia | 0                   | 0                    | 0                   | 0                    |
| <b>seq744</b>  | Firmicutes    | Erysipelotrichia | 0                   | 0                    | 0                   | 0                    |
| <b>seq882</b>  | Firmicutes    | Erysipelotrichia | 207                 | 0                    | 0                   | 0                    |
| <b>seq666</b>  | Firmicutes    | Erysipelotrichia | 0                   | 0                    | 0                   | 0                    |

Sequence Count Table

|                | <b>Phylum</b> | <b>Class</b>     | <b>Subject26WK0</b> | <b>Subject26WK12</b> | <b>Subject14WK0</b> | <b>Subject14WK12</b> |
|----------------|---------------|------------------|---------------------|----------------------|---------------------|----------------------|
| <b>seq1341</b> | Firmicutes    | Clostridia       | 0                   | 0                    | 0                   | 0                    |
| <b>seq1353</b> | Firmicutes    | Clostridia       | 0                   | 0                    | 0                   | 0                    |
| <b>seq1362</b> | Firmicutes    | Clostridia       | 0                   | 0                    | 0                   | 0                    |
| <b>seq1403</b> | Firmicutes    | Clostridia       | 0                   | 0                    | 0                   | 0                    |
| <b>seq1477</b> | Firmicutes    | Clostridia       | 0                   | 0                    | 0                   | 0                    |
| <b>seq1510</b> | Firmicutes    | Clostridia       | 0                   | 0                    | 0                   | 0                    |
| <b>seq1524</b> | Firmicutes    | Clostridia       | 0                   | 0                    | 0                   | 0                    |
| <b>seq1564</b> | Firmicutes    | Clostridia       | 0                   | 0                    | 0                   | 0                    |
| <b>seq1578</b> | Firmicutes    | Clostridia       | 0                   | 0                    | 0                   | 0                    |
| <b>seq1636</b> | Firmicutes    | Clostridia       | 0                   | 0                    | 0                   | 0                    |
| <b>seq1652</b> | Firmicutes    | Clostridia       | 0                   | 0                    | 0                   | 0                    |
| <b>seq1672</b> | Firmicutes    | Clostridia       | 0                   | 0                    | 0                   | 0                    |
| <b>seq1689</b> | Firmicutes    | Clostridia       | 0                   | 0                    | 0                   | 0                    |
| <b>seq1716</b> | Firmicutes    | Clostridia       | 0                   | 0                    | 0                   | 0                    |
| <b>seq1735</b> | Firmicutes    | Clostridia       | 0                   | 0                    | 0                   | 0                    |
| <b>seq1839</b> | Firmicutes    | Clostridia       | 0                   | 0                    | 0                   | 0                    |
| <b>seq1869</b> | Firmicutes    | Clostridia       | 0                   | 0                    | 0                   | 0                    |
| <b>seq938</b>  | Firmicutes    | Clostridia       | 0                   | 0                    | 0                   | 0                    |
| <b>seq1060</b> | Firmicutes    | Clostridia       | 0                   | 0                    | 0                   | 0                    |
| <b>seq1367</b> | Firmicutes    | Clostridia       | 0                   | 0                    | 0                   | 0                    |
| <b>seq1454</b> | Firmicutes    | Clostridia       | 0                   | 0                    | 0                   | 0                    |
| <b>seq1693</b> | Firmicutes    | Clostridia       | 0                   | 0                    | 0                   | 0                    |
| <b>seq1229</b> | Firmicutes    | Bacilli          | 0                   | 0                    | 0                   | 0                    |
| <b>seq1326</b> | Firmicutes    | Bacilli          | 0                   | 0                    | 0                   | 0                    |
| <b>seq353</b>  | Firmicutes    | Erysipelotrichia | 23                  | 126                  | 0                   | 0                    |
| <b>seq732</b>  | Firmicutes    | Erysipelotrichia | 0                   | 0                    | 0                   | 0                    |
| <b>seq1407</b> | Firmicutes    | Erysipelotrichia | 0                   | 0                    | 0                   | 0                    |
| <b>seq45</b>   | Firmicutes    | Erysipelotrichia | 0                   | 0                    | 0                   | 0                    |
| <b>seq362</b>  | Firmicutes    | Erysipelotrichia | 0                   | 0                    | 0                   | 0                    |
| <b>seq744</b>  | Firmicutes    | Erysipelotrichia | 0                   | 0                    | 0                   | 0                    |
| <b>seq882</b>  | Firmicutes    | Erysipelotrichia | 0                   | 0                    | 0                   | 0                    |
| <b>seq666</b>  | Firmicutes    | Erysipelotrichia | 0                   | 0                    | 0                   | 0                    |

Sequence Count Table

|                | <b>Phylum</b> | <b>Class</b>     | <b>Subject27WK0</b> | <b>Subject27WK12</b> | <b>Subject15WK0</b> | <b>Subject15WK12</b> |
|----------------|---------------|------------------|---------------------|----------------------|---------------------|----------------------|
| <b>seq1341</b> | Firmicutes    | Clostridia       | 0                   | 0                    | 0                   | 0                    |
| <b>seq1353</b> | Firmicutes    | Clostridia       | 0                   | 48                   | 0                   | 0                    |
| <b>seq1362</b> | Firmicutes    | Clostridia       | 0                   | 47                   | 0                   | 0                    |
| <b>seq1403</b> | Firmicutes    | Clostridia       | 0                   | 0                    | 0                   | 0                    |
| <b>seq1477</b> | Firmicutes    | Clostridia       | 0                   | 0                    | 0                   | 0                    |
| <b>seq1510</b> | Firmicutes    | Clostridia       | 0                   | 0                    | 0                   | 0                    |
| <b>seq1524</b> | Firmicutes    | Clostridia       | 0                   | 0                    | 0                   | 0                    |
| <b>seq1564</b> | Firmicutes    | Clostridia       | 0                   | 0                    | 0                   | 0                    |
| <b>seq1578</b> | Firmicutes    | Clostridia       | 0                   | 0                    | 0                   | 0                    |
| <b>seq1636</b> | Firmicutes    | Clostridia       | 0                   | 0                    | 0                   | 0                    |
| <b>seq1652</b> | Firmicutes    | Clostridia       | 0                   | 0                    | 0                   | 0                    |
| <b>seq1672</b> | Firmicutes    | Clostridia       | 0                   | 0                    | 0                   | 0                    |
| <b>seq1689</b> | Firmicutes    | Clostridia       | 0                   | 0                    | 0                   | 0                    |
| <b>seq1716</b> | Firmicutes    | Clostridia       | 0                   | 0                    | 0                   | 0                    |
| <b>seq1735</b> | Firmicutes    | Clostridia       | 0                   | 0                    | 0                   | 0                    |
| <b>seq1839</b> | Firmicutes    | Clostridia       | 0                   | 0                    | 0                   | 0                    |
| <b>seq1869</b> | Firmicutes    | Clostridia       | 0                   | 0                    | 0                   | 0                    |
| <b>seq938</b>  | Firmicutes    | Clostridia       | 0                   | 0                    | 0                   | 0                    |
| <b>seq1060</b> | Firmicutes    | Clostridia       | 0                   | 0                    | 0                   | 0                    |
| <b>seq1367</b> | Firmicutes    | Clostridia       | 0                   | 0                    | 0                   | 0                    |
| <b>seq1454</b> | Firmicutes    | Clostridia       | 0                   | 0                    | 0                   | 0                    |
| <b>seq1693</b> | Firmicutes    | Clostridia       | 0                   | 0                    | 0                   | 0                    |
| <b>seq1229</b> | Firmicutes    | Bacilli          | 0                   | 0                    | 0                   | 0                    |
| <b>seq1326</b> | Firmicutes    | Bacilli          | 0                   | 0                    | 0                   | 0                    |
| <b>seq353</b>  | Firmicutes    | Erysipelotrichia | 0                   | 0                    | 0                   | 0                    |
| <b>seq732</b>  | Firmicutes    | Erysipelotrichia | 0                   | 0                    | 0                   | 0                    |
| <b>seq1407</b> | Firmicutes    | Erysipelotrichia | 0                   | 0                    | 0                   | 0                    |
| <b>seq45</b>   | Firmicutes    | Erysipelotrichia | 0                   | 0                    | 0                   | 0                    |
| <b>seq362</b>  | Firmicutes    | Erysipelotrichia | 0                   | 0                    | 0                   | 0                    |
| <b>seq744</b>  | Firmicutes    | Erysipelotrichia | 0                   | 0                    | 0                   | 0                    |
| <b>seq882</b>  | Firmicutes    | Erysipelotrichia | 0                   | 0                    | 0                   | 0                    |
| <b>seq666</b>  | Firmicutes    | Erysipelotrichia | 38                  | 7                    | 0                   | 0                    |

Sequence Count Table

|                | <b>Phylum</b> | <b>Class</b>     | <b>Δ</b> |  |  |  |
|----------------|---------------|------------------|----------|--|--|--|
| <b>seq1341</b> | Firmicutes    | Clostridia       |          |  |  |  |
| <b>seq1353</b> | Firmicutes    | Clostridia       |          |  |  |  |
| <b>seq1362</b> | Firmicutes    | Clostridia       |          |  |  |  |
| <b>seq1403</b> | Firmicutes    | Clostridia       |          |  |  |  |
| <b>seq1477</b> | Firmicutes    | Clostridia       |          |  |  |  |
| <b>seq1510</b> | Firmicutes    | Clostridia       |          |  |  |  |
| <b>seq1524</b> | Firmicutes    | Clostridia       |          |  |  |  |
| <b>seq1564</b> | Firmicutes    | Clostridia       |          |  |  |  |
| <b>seq1578</b> | Firmicutes    | Clostridia       |          |  |  |  |
| <b>seq1636</b> | Firmicutes    | Clostridia       |          |  |  |  |
| <b>seq1652</b> | Firmicutes    | Clostridia       |          |  |  |  |
| <b>seq1672</b> | Firmicutes    | Clostridia       |          |  |  |  |
| <b>seq1689</b> | Firmicutes    | Clostridia       |          |  |  |  |
| <b>seq1716</b> | Firmicutes    | Clostridia       |          |  |  |  |
| <b>seq1735</b> | Firmicutes    | Clostridia       |          |  |  |  |
| <b>seq1839</b> | Firmicutes    | Clostridia       |          |  |  |  |
| <b>seq1869</b> | Firmicutes    | Clostridia       |          |  |  |  |
| <b>seq938</b>  | Firmicutes    | Clostridia       |          |  |  |  |
| <b>seq1060</b> | Firmicutes    | Clostridia       |          |  |  |  |
| <b>seq1367</b> | Firmicutes    | Clostridia       |          |  |  |  |
| <b>seq1454</b> | Firmicutes    | Clostridia       |          |  |  |  |
| <b>seq1693</b> | Firmicutes    | Clostridia       |          |  |  |  |
| <b>seq1229</b> | Firmicutes    | Bacilli          |          |  |  |  |
| <b>seq1326</b> | Firmicutes    | Bacilli          |          |  |  |  |
| <b>seq353</b>  | Firmicutes    | Erysipelotrichia |          |  |  |  |
| <b>seq732</b>  | Firmicutes    | Erysipelotrichia |          |  |  |  |
| <b>seq1407</b> | Firmicutes    | Erysipelotrichia |          |  |  |  |
| <b>seq45</b>   | Firmicutes    | Erysipelotrichia |          |  |  |  |
| <b>seq362</b>  | Firmicutes    | Erysipelotrichia |          |  |  |  |
| <b>seq744</b>  | Firmicutes    | Erysipelotrichia |          |  |  |  |
| <b>seq882</b>  | Firmicutes    | Erysipelotrichia |          |  |  |  |
| <b>seq666</b>  | Firmicutes    | Erysipelotrichia |          |  |  |  |



Sequence Count Table

|                | <b>Phylum</b> | <b>Class</b>     | <b>Order</b>       | <b>Family</b>       |
|----------------|---------------|------------------|--------------------|---------------------|
| <b>seq1368</b> | Firmicutes    | Erysipelotrichia | Erysipelotrichales | Erysipelotrichaceae |
| <b>seq719</b>  | Firmicutes    | Erysipelotrichia | Erysipelotrichales | Erysipelotrichaceae |
| <b>seq195</b>  | Firmicutes    | Erysipelotrichia | Erysipelotrichales | Erysipelotrichaceae |
| <b>seq261</b>  | Firmicutes    | Erysipelotrichia | Erysipelotrichales | Erysipelotrichaceae |
| <b>seq434</b>  | Firmicutes    | Erysipelotrichia | Erysipelotrichales | Erysipelotrichaceae |
| <b>seq697</b>  | Firmicutes    | Erysipelotrichia | Erysipelotrichales | Erysipelotrichaceae |
| <b>seq1405</b> | Firmicutes    | Erysipelotrichia | Erysipelotrichales | Erysipelotrichaceae |
| <b>seq54</b>   | Firmicutes    | Erysipelotrichia | Erysipelotrichales | Erysipelotrichaceae |
| <b>seq442</b>  | Firmicutes    | Erysipelotrichia | Erysipelotrichales | Erysipelotrichaceae |
| <b>seq653</b>  | Firmicutes    | Erysipelotrichia | Erysipelotrichales | Erysipelotrichaceae |
| <b>seq706</b>  | Firmicutes    | Erysipelotrichia | Erysipelotrichales | Erysipelotrichaceae |
| <b>seq1206</b> | Firmicutes    | Erysipelotrichia | Erysipelotrichales | Erysipelotrichaceae |
| <b>seq237</b>  | Firmicutes    | Erysipelotrichia | Erysipelotrichales | Erysipelotrichaceae |
| <b>seq729</b>  | Firmicutes    | Erysipelotrichia | Erysipelotrichales | Erysipelotrichaceae |
| <b>seq977</b>  | Firmicutes    | Erysipelotrichia | Erysipelotrichales | Erysipelotrichaceae |
| <b>seq1445</b> | Firmicutes    | Erysipelotrichia | Erysipelotrichales | Erysipelotrichaceae |
| <b>seq55</b>   | Firmicutes    | Erysipelotrichia | Erysipelotrichales | Erysipelotrichaceae |
| <b>seq186</b>  | Firmicutes    | Erysipelotrichia | Erysipelotrichales | Erysipelotrichaceae |
| <b>seq229</b>  | Firmicutes    | Erysipelotrichia | Erysipelotrichales | Erysipelotrichaceae |
| <b>seq408</b>  | Firmicutes    | Erysipelotrichia | Erysipelotrichales | Erysipelotrichaceae |
| <b>seq543</b>  | Firmicutes    | Erysipelotrichia | Erysipelotrichales | Erysipelotrichaceae |
| <b>seq667</b>  | Firmicutes    | Erysipelotrichia | Erysipelotrichales | Erysipelotrichaceae |
| <b>seq698</b>  | Firmicutes    | Erysipelotrichia | Erysipelotrichales | Erysipelotrichaceae |
| <b>seq1015</b> | Firmicutes    | Erysipelotrichia | Erysipelotrichales | Erysipelotrichaceae |
| <b>seq598</b>  | Firmicutes    | Erysipelotrichia | Erysipelotrichales | Erysipelotrichaceae |
| <b>seq887</b>  | Firmicutes    | Erysipelotrichia | Erysipelotrichales | Erysipelotrichaceae |
| <b>seq969</b>  | Firmicutes    | Erysipelotrichia | Erysipelotrichales | Erysipelotrichaceae |
| <b>seq1030</b> | Firmicutes    | Erysipelotrichia | Erysipelotrichales | Erysipelotrichaceae |
| <b>seq1129</b> | Firmicutes    | Erysipelotrichia | Erysipelotrichales | Erysipelotrichaceae |
| <b>seq1035</b> | Firmicutes    | Erysipelotrichia | Erysipelotrichales | Erysipelotrichaceae |
| <b>seq1880</b> | Firmicutes    | Erysipelotrichia | Erysipelotrichales | Erysipelotrichaceae |
| <b>seq288</b>  | Firmicutes    | Erysipelotrichia | Erysipelotrichales | Erysipelotrichaceae |

Sequence Count Table

|                | <b>Phylum</b> | <b>Class</b>     | <b>Genus</b>                | <b>Species</b> |
|----------------|---------------|------------------|-----------------------------|----------------|
| <b>seq1368</b> | Firmicutes    | Erysipelotrichia | Coprobacillus               |                |
| <b>seq719</b>  | Firmicutes    | Erysipelotrichia | Dielma                      | fastidiosa     |
| <b>seq195</b>  | Firmicutes    | Erysipelotrichia | Erysipelatoclostridium      | ramosum        |
| <b>seq261</b>  | Firmicutes    | Erysipelotrichia | Erysipelatoclostridium      |                |
| <b>seq434</b>  | Firmicutes    | Erysipelotrichia | Erysipelatoclostridium      |                |
| <b>seq697</b>  | Firmicutes    | Erysipelotrichia | Erysipelatoclostridium      |                |
| <b>seq1405</b> | Firmicutes    | Erysipelotrichia | Erysipelatoclostridium      |                |
| <b>seq54</b>   | Firmicutes    | Erysipelotrichia | Erysipelotrichaceae_UCG-003 |                |
| <b>seq442</b>  | Firmicutes    | Erysipelotrichia | Erysipelotrichaceae_UCG-003 |                |
| <b>seq653</b>  | Firmicutes    | Erysipelotrichia | Erysipelotrichaceae_UCG-003 |                |
| <b>seq706</b>  | Firmicutes    | Erysipelotrichia | Erysipelotrichaceae_UCG-003 |                |
| <b>seq1206</b> | Firmicutes    | Erysipelotrichia | Erysipelotrichaceae_UCG-006 |                |
| <b>seq237</b>  | Firmicutes    | Erysipelotrichia | Faecalitalea                |                |
| <b>seq729</b>  | Firmicutes    | Erysipelotrichia | Faecalitalea                |                |
| <b>seq977</b>  | Firmicutes    | Erysipelotrichia | Faecalitalea                |                |
| <b>seq1445</b> | Firmicutes    | Erysipelotrichia | Faecalitalea                |                |
| <b>seq55</b>   | Firmicutes    | Erysipelotrichia | Holdemanella                |                |
| <b>seq186</b>  | Firmicutes    | Erysipelotrichia | Holdemanella                | biformis       |
| <b>seq229</b>  | Firmicutes    | Erysipelotrichia | Holdemanella                |                |
| <b>seq408</b>  | Firmicutes    | Erysipelotrichia | Holdemanella                |                |
| <b>seq543</b>  | Firmicutes    | Erysipelotrichia | Holdemanella                |                |
| <b>seq667</b>  | Firmicutes    | Erysipelotrichia | Holdemanella                |                |
| <b>seq698</b>  | Firmicutes    | Erysipelotrichia | Holdemanella                |                |
| <b>seq1015</b> | Firmicutes    | Erysipelotrichia | Holdemanella                |                |
| <b>seq598</b>  | Firmicutes    | Erysipelotrichia | Holdemania                  | filiformis     |
| <b>seq887</b>  | Firmicutes    | Erysipelotrichia | Holdemania                  | massiliensis   |
| <b>seq969</b>  | Firmicutes    | Erysipelotrichia | Holdemania                  |                |
| <b>seq1030</b> | Firmicutes    | Erysipelotrichia | Merdibacter                 |                |
| <b>seq1129</b> | Firmicutes    | Erysipelotrichia | Merdibacter                 |                |
| <b>seq1035</b> | Firmicutes    | Erysipelotrichia | Solobacterium               |                |
| <b>seq1880</b> | Firmicutes    | Erysipelotrichia | Solobacterium               | moorei         |
| <b>seq288</b>  | Firmicutes    | Erysipelotrichia | Turicibacter                | sanguinis      |

Sequence Count Table

|                | <b>Phylum</b> | <b>Class</b>     | <b>Subject34WK0</b> | <b>Subject34WK12</b> | <b>Subject16WK0</b> | <b>Subject16WK12</b> |
|----------------|---------------|------------------|---------------------|----------------------|---------------------|----------------------|
| <b>seq1368</b> | Firmicutes    | Erysipelotrichia | 0                   | 0                    | 0                   | 0                    |
| <b>seq719</b>  | Firmicutes    | Erysipelotrichia | 0                   | 0                    | 0                   | 0                    |
| <b>seq195</b>  | Firmicutes    | Erysipelotrichia | 0                   | 399                  | 0                   | 0                    |
| <b>seq261</b>  | Firmicutes    | Erysipelotrichia | 0                   | 0                    | 98                  | 29                   |
| <b>seq434</b>  | Firmicutes    | Erysipelotrichia | 0                   | 0                    | 0                   | 0                    |
| <b>seq697</b>  | Firmicutes    | Erysipelotrichia | 0                   | 0                    | 0                   | 0                    |
| <b>seq1405</b> | Firmicutes    | Erysipelotrichia | 0                   | 0                    | 0                   | 0                    |
| <b>seq54</b>   | Firmicutes    | Erysipelotrichia | 80                  | 445                  | 93                  | 39                   |
| <b>seq442</b>  | Firmicutes    | Erysipelotrichia | 0                   | 0                    | 0                   | 0                    |
| <b>seq653</b>  | Firmicutes    | Erysipelotrichia | 0                   | 236                  | 0                   | 0                    |
| <b>seq706</b>  | Firmicutes    | Erysipelotrichia | 0                   | 0                    | 0                   | 0                    |
| <b>seq1206</b> | Firmicutes    | Erysipelotrichia | 0                   | 0                    | 0                   | 0                    |
| <b>seq237</b>  | Firmicutes    | Erysipelotrichia | 44                  | 615                  | 0                   | 0                    |
| <b>seq729</b>  | Firmicutes    | Erysipelotrichia | 0                   | 0                    | 0                   | 0                    |
| <b>seq977</b>  | Firmicutes    | Erysipelotrichia | 0                   | 0                    | 0                   | 0                    |
| <b>seq1445</b> | Firmicutes    | Erysipelotrichia | 0                   | 0                    | 0                   | 0                    |
| <b>seq55</b>   | Firmicutes    | Erysipelotrichia | 0                   | 0                    | 1121                | 773                  |
| <b>seq186</b>  | Firmicutes    | Erysipelotrichia | 0                   | 0                    | 1302                | 891                  |
| <b>seq229</b>  | Firmicutes    | Erysipelotrichia | 0                   | 0                    | 0                   | 0                    |
| <b>seq408</b>  | Firmicutes    | Erysipelotrichia | 0                   | 0                    | 0                   | 0                    |
| <b>seq543</b>  | Firmicutes    | Erysipelotrichia | 0                   | 0                    | 0                   | 0                    |
| <b>seq667</b>  | Firmicutes    | Erysipelotrichia | 0                   | 0                    | 0                   | 0                    |
| <b>seq698</b>  | Firmicutes    | Erysipelotrichia | 0                   | 0                    | 0                   | 0                    |
| <b>seq1015</b> | Firmicutes    | Erysipelotrichia | 0                   | 0                    | 0                   | 0                    |
| <b>seq598</b>  | Firmicutes    | Erysipelotrichia | 0                   | 0                    | 0                   | 0                    |
| <b>seq887</b>  | Firmicutes    | Erysipelotrichia | 0                   | 0                    | 0                   | 0                    |
| <b>seq969</b>  | Firmicutes    | Erysipelotrichia | 0                   | 0                    | 0                   | 0                    |
| <b>seq1030</b> | Firmicutes    | Erysipelotrichia | 0                   | 0                    | 0                   | 0                    |
| <b>seq1129</b> | Firmicutes    | Erysipelotrichia | 0                   | 0                    | 0                   | 0                    |
| <b>seq1035</b> | Firmicutes    | Erysipelotrichia | 0                   | 0                    | 0                   | 0                    |
| <b>seq1880</b> | Firmicutes    | Erysipelotrichia | 0                   | 0                    | 0                   | 0                    |
| <b>seq288</b>  | Firmicutes    | Erysipelotrichia | 0                   | 15                   | 0                   | 0                    |

Sequence Count Table

|                | <b>Phylum</b> | <b>Class</b>     | <b>Subject17WK0</b> | <b>Subject17WK12</b> | <b>Subject1WK0</b> | <b>Subject1WK12</b> |
|----------------|---------------|------------------|---------------------|----------------------|--------------------|---------------------|
| <b>seq1368</b> | Firmicutes    | Erysipelotrichia | 0                   | 0                    | 0                  | 0                   |
| <b>seq719</b>  | Firmicutes    | Erysipelotrichia | 9                   | 0                    | 0                  | 0                   |
| <b>seq195</b>  | Firmicutes    | Erysipelotrichia | 0                   | 0                    | 0                  | 0                   |
| <b>seq261</b>  | Firmicutes    | Erysipelotrichia | 251                 | 26                   | 40                 | 51                  |
| <b>seq434</b>  | Firmicutes    | Erysipelotrichia | 0                   | 0                    | 0                  | 0                   |
| <b>seq697</b>  | Firmicutes    | Erysipelotrichia | 0                   | 0                    | 0                  | 0                   |
| <b>seq1405</b> | Firmicutes    | Erysipelotrichia | 0                   | 0                    | 0                  | 0                   |
| <b>seq54</b>   | Firmicutes    | Erysipelotrichia | 321                 | 462                  | 1067               | 1183                |
| <b>seq442</b>  | Firmicutes    | Erysipelotrichia | 0                   | 0                    | 471                | 551                 |
| <b>seq653</b>  | Firmicutes    | Erysipelotrichia | 0                   | 0                    | 0                  | 0                   |
| <b>seq706</b>  | Firmicutes    | Erysipelotrichia | 0                   | 0                    | 0                  | 0                   |
| <b>seq1206</b> | Firmicutes    | Erysipelotrichia | 0                   | 0                    | 0                  | 0                   |
| <b>seq237</b>  | Firmicutes    | Erysipelotrichia | 0                   | 0                    | 7                  | 13                  |
| <b>seq729</b>  | Firmicutes    | Erysipelotrichia | 0                   | 0                    | 0                  | 0                   |
| <b>seq977</b>  | Firmicutes    | Erysipelotrichia | 0                   | 0                    | 0                  | 0                   |
| <b>seq1445</b> | Firmicutes    | Erysipelotrichia | 0                   | 0                    | 0                  | 0                   |
| <b>seq55</b>   | Firmicutes    | Erysipelotrichia | 0                   | 0                    | 0                  | 0                   |
| <b>seq186</b>  | Firmicutes    | Erysipelotrichia | 0                   | 0                    | 0                  | 0                   |
| <b>seq229</b>  | Firmicutes    | Erysipelotrichia | 2475                | 1491                 | 0                  | 0                   |
| <b>seq408</b>  | Firmicutes    | Erysipelotrichia | 0                   | 0                    | 0                  | 0                   |
| <b>seq543</b>  | Firmicutes    | Erysipelotrichia | 0                   | 0                    | 0                  | 0                   |
| <b>seq667</b>  | Firmicutes    | Erysipelotrichia | 0                   | 0                    | 0                  | 0                   |
| <b>seq698</b>  | Firmicutes    | Erysipelotrichia | 0                   | 0                    | 0                  | 0                   |
| <b>seq1015</b> | Firmicutes    | Erysipelotrichia | 0                   | 0                    | 0                  | 0                   |
| <b>seq598</b>  | Firmicutes    | Erysipelotrichia | 20                  | 6                    | 35                 | 31                  |
| <b>seq887</b>  | Firmicutes    | Erysipelotrichia | 0                   | 0                    | 0                  | 0                   |
| <b>seq969</b>  | Firmicutes    | Erysipelotrichia | 0                   | 0                    | 0                  | 0                   |
| <b>seq1030</b> | Firmicutes    | Erysipelotrichia | 0                   | 0                    | 0                  | 0                   |
| <b>seq1129</b> | Firmicutes    | Erysipelotrichia | 0                   | 0                    | 0                  | 0                   |
| <b>seq1035</b> | Firmicutes    | Erysipelotrichia | 0                   | 0                    | 0                  | 0                   |
| <b>seq1880</b> | Firmicutes    | Erysipelotrichia | 0                   | 0                    | 0                  | 0                   |
| <b>seq288</b>  | Firmicutes    | Erysipelotrichia | 0                   | 0                    | 0                  | 0                   |

Sequence Count Table

|                | <b>Phylum</b> | <b>Class</b>     | <b>Subject2WK0</b> | <b>Subject2WK12</b> | <b>Subject3WK0</b> | <b>Subject3WK12</b> |
|----------------|---------------|------------------|--------------------|---------------------|--------------------|---------------------|
| <b>seq1368</b> | Firmicutes    | Erysipelotrichia | 0                  | 0                   | 0                  | 0                   |
| <b>seq719</b>  | Firmicutes    | Erysipelotrichia | 0                  | 279                 | 0                  | 0                   |
| <b>seq195</b>  | Firmicutes    | Erysipelotrichia | 0                  | 589                 | 1155               | 97                  |
| <b>seq261</b>  | Firmicutes    | Erysipelotrichia | 36                 | 74                  | 112                | 73                  |
| <b>seq434</b>  | Firmicutes    | Erysipelotrichia | 11                 | 8                   | 415                | 13                  |
| <b>seq697</b>  | Firmicutes    | Erysipelotrichia | 0                  | 0                   | 0                  | 0                   |
| <b>seq1405</b> | Firmicutes    | Erysipelotrichia | 0                  | 0                   | 40                 | 0                   |
| <b>seq54</b>   | Firmicutes    | Erysipelotrichia | 245                | 371                 | 0                  | 787                 |
| <b>seq442</b>  | Firmicutes    | Erysipelotrichia | 0                  | 0                   | 0                  | 0                   |
| <b>seq653</b>  | Firmicutes    | Erysipelotrichia | 0                  | 0                   | 0                  | 0                   |
| <b>seq706</b>  | Firmicutes    | Erysipelotrichia | 0                  | 0                   | 0                  | 0                   |
| <b>seq1206</b> | Firmicutes    | Erysipelotrichia | 0                  | 0                   | 0                  | 0                   |
| <b>seq237</b>  | Firmicutes    | Erysipelotrichia | 5                  | 0                   | 0                  | 0                   |
| <b>seq729</b>  | Firmicutes    | Erysipelotrichia | 0                  | 0                   | 58                 | 0                   |
| <b>seq977</b>  | Firmicutes    | Erysipelotrichia | 0                  | 0                   | 0                  | 0                   |
| <b>seq1445</b> | Firmicutes    | Erysipelotrichia | 0                  | 0                   | 0                  | 0                   |
| <b>seq55</b>   | Firmicutes    | Erysipelotrichia | 0                  | 0                   | 0                  | 0                   |
| <b>seq186</b>  | Firmicutes    | Erysipelotrichia | 0                  | 0                   | 0                  | 0                   |
| <b>seq229</b>  | Firmicutes    | Erysipelotrichia | 0                  | 0                   | 0                  | 0                   |
| <b>seq408</b>  | Firmicutes    | Erysipelotrichia | 0                  | 0                   | 0                  | 0                   |
| <b>seq543</b>  | Firmicutes    | Erysipelotrichia | 0                  | 0                   | 0                  | 0                   |
| <b>seq667</b>  | Firmicutes    | Erysipelotrichia | 0                  | 0                   | 0                  | 0                   |
| <b>seq698</b>  | Firmicutes    | Erysipelotrichia | 0                  | 0                   | 0                  | 0                   |
| <b>seq1015</b> | Firmicutes    | Erysipelotrichia | 0                  | 0                   | 0                  | 0                   |
| <b>seq598</b>  | Firmicutes    | Erysipelotrichia | 24                 | 36                  | 0                  | 0                   |
| <b>seq887</b>  | Firmicutes    | Erysipelotrichia | 0                  | 0                   | 0                  | 0                   |
| <b>seq969</b>  | Firmicutes    | Erysipelotrichia | 0                  | 0                   | 0                  | 0                   |
| <b>seq1030</b> | Firmicutes    | Erysipelotrichia | 0                  | 0                   | 0                  | 0                   |
| <b>seq1129</b> | Firmicutes    | Erysipelotrichia | 0                  | 0                   | 60                 | 0                   |
| <b>seq1035</b> | Firmicutes    | Erysipelotrichia | 0                  | 0                   | 0                  | 0                   |
| <b>seq1880</b> | Firmicutes    | Erysipelotrichia | 0                  | 0                   | 0                  | 0                   |
| <b>seq288</b>  | Firmicutes    | Erysipelotrichia | 0                  | 61                  | 0                  | 0                   |

Sequence Count Table

|                | <b>Phylum</b> | <b>Class</b>     | <b>Subject4WK0</b> | <b>Subject4WK12</b> | <b>Subject5WK0</b> | <b>Subject5WK12</b> |
|----------------|---------------|------------------|--------------------|---------------------|--------------------|---------------------|
| <b>seq1368</b> | Firmicutes    | Erysipelotrichia | 0                  | 0                   | 0                  | 0                   |
| <b>seq719</b>  | Firmicutes    | Erysipelotrichia | 0                  | 8                   | 0                  | 13                  |
| <b>seq195</b>  | Firmicutes    | Erysipelotrichia | 0                  | 0                   | 0                  | 496                 |
| <b>seq261</b>  | Firmicutes    | Erysipelotrichia | 0                  | 0                   | 115                | 70                  |
| <b>seq434</b>  | Firmicutes    | Erysipelotrichia | 0                  | 0                   | 0                  | 0                   |
| <b>seq697</b>  | Firmicutes    | Erysipelotrichia | 0                  | 0                   | 0                  | 0                   |
| <b>seq1405</b> | Firmicutes    | Erysipelotrichia | 0                  | 0                   | 0                  | 0                   |
| <b>seq54</b>   | Firmicutes    | Erysipelotrichia | 587                | 555                 | 415                | 819                 |
| <b>seq442</b>  | Firmicutes    | Erysipelotrichia | 0                  | 0                   | 0                  | 0                   |
| <b>seq653</b>  | Firmicutes    | Erysipelotrichia | 0                  | 0                   | 0                  | 221                 |
| <b>seq706</b>  | Firmicutes    | Erysipelotrichia | 0                  | 0                   | 0                  | 0                   |
| <b>seq1206</b> | Firmicutes    | Erysipelotrichia | 0                  | 0                   | 0                  | 0                   |
| <b>seq237</b>  | Firmicutes    | Erysipelotrichia | 0                  | 0                   | 59                 | 123                 |
| <b>seq729</b>  | Firmicutes    | Erysipelotrichia | 0                  | 0                   | 0                  | 0                   |
| <b>seq977</b>  | Firmicutes    | Erysipelotrichia | 0                  | 0                   | 0                  | 0                   |
| <b>seq1445</b> | Firmicutes    | Erysipelotrichia | 0                  | 0                   | 0                  | 0                   |
| <b>seq55</b>   | Firmicutes    | Erysipelotrichia | 0                  | 0                   | 0                  | 0                   |
| <b>seq186</b>  | Firmicutes    | Erysipelotrichia | 0                  | 0                   | 0                  | 0                   |
| <b>seq229</b>  | Firmicutes    | Erysipelotrichia | 0                  | 0                   | 0                  | 0                   |
| <b>seq408</b>  | Firmicutes    | Erysipelotrichia | 0                  | 0                   | 0                  | 0                   |
| <b>seq543</b>  | Firmicutes    | Erysipelotrichia | 0                  | 0                   | 0                  | 0                   |
| <b>seq667</b>  | Firmicutes    | Erysipelotrichia | 0                  | 0                   | 0                  | 0                   |
| <b>seq698</b>  | Firmicutes    | Erysipelotrichia | 0                  | 0                   | 0                  | 0                   |
| <b>seq1015</b> | Firmicutes    | Erysipelotrichia | 0                  | 0                   | 0                  | 0                   |
| <b>seq598</b>  | Firmicutes    | Erysipelotrichia | 19                 | 34                  | 0                  | 0                   |
| <b>seq887</b>  | Firmicutes    | Erysipelotrichia | 0                  | 0                   | 0                  | 0                   |
| <b>seq969</b>  | Firmicutes    | Erysipelotrichia | 0                  | 0                   | 40                 | 66                  |
| <b>seq1030</b> | Firmicutes    | Erysipelotrichia | 0                  | 0                   | 0                  | 0                   |
| <b>seq1129</b> | Firmicutes    | Erysipelotrichia | 0                  | 0                   | 0                  | 0                   |
| <b>seq1035</b> | Firmicutes    | Erysipelotrichia | 0                  | 0                   | 0                  | 0                   |
| <b>seq1880</b> | Firmicutes    | Erysipelotrichia | 0                  | 0                   | 0                  | 0                   |
| <b>seq288</b>  | Firmicutes    | Erysipelotrichia | 0                  | 24                  | 31                 | 0                   |

Sequence Count Table

|                | <b>Phylum</b> | <b>Class</b>     | <b>Subject6WK0</b> | <b>Subject6WK12</b> | <b>Subject18WK0</b> | <b>Subject18WK12</b> |
|----------------|---------------|------------------|--------------------|---------------------|---------------------|----------------------|
| <b>seq1368</b> | Firmicutes    | Erysipelotrichia | 0                  | 0                   | 0                   | 0                    |
| <b>seq719</b>  | Firmicutes    | Erysipelotrichia | 0                  | 0                   | 0                   | 0                    |
| <b>seq195</b>  | Firmicutes    | Erysipelotrichia | 0                  | 0                   | 29                  | 35                   |
| <b>seq261</b>  | Firmicutes    | Erysipelotrichia | 0                  | 0                   | 166                 | 0                    |
| <b>seq434</b>  | Firmicutes    | Erysipelotrichia | 0                  | 0                   | 0                   | 0                    |
| <b>seq697</b>  | Firmicutes    | Erysipelotrichia | 0                  | 0                   | 0                   | 0                    |
| <b>seq1405</b> | Firmicutes    | Erysipelotrichia | 0                  | 0                   | 0                   | 0                    |
| <b>seq54</b>   | Firmicutes    | Erysipelotrichia | 521                | 776                 | 0                   | 0                    |
| <b>seq442</b>  | Firmicutes    | Erysipelotrichia | 0                  | 0                   | 0                   | 0                    |
| <b>seq653</b>  | Firmicutes    | Erysipelotrichia | 0                  | 0                   | 0                   | 0                    |
| <b>seq706</b>  | Firmicutes    | Erysipelotrichia | 0                  | 0                   | 0                   | 0                    |
| <b>seq1206</b> | Firmicutes    | Erysipelotrichia | 0                  | 0                   | 0                   | 0                    |
| <b>seq237</b>  | Firmicutes    | Erysipelotrichia | 0                  | 0                   | 19                  | 0                    |
| <b>seq729</b>  | Firmicutes    | Erysipelotrichia | 0                  | 0                   | 33                  | 0                    |
| <b>seq977</b>  | Firmicutes    | Erysipelotrichia | 0                  | 0                   | 0                   | 0                    |
| <b>seq1445</b> | Firmicutes    | Erysipelotrichia | 0                  | 0                   | 0                   | 0                    |
| <b>seq55</b>   | Firmicutes    | Erysipelotrichia | 1534               | 2225                | 0                   | 0                    |
| <b>seq186</b>  | Firmicutes    | Erysipelotrichia | 0                  | 0                   | 0                   | 0                    |
| <b>seq229</b>  | Firmicutes    | Erysipelotrichia | 0                  | 0                   | 0                   | 0                    |
| <b>seq408</b>  | Firmicutes    | Erysipelotrichia | 0                  | 0                   | 0                   | 0                    |
| <b>seq543</b>  | Firmicutes    | Erysipelotrichia | 0                  | 0                   | 0                   | 0                    |
| <b>seq667</b>  | Firmicutes    | Erysipelotrichia | 0                  | 0                   | 0                   | 0                    |
| <b>seq698</b>  | Firmicutes    | Erysipelotrichia | 168                | 214                 | 0                   | 0                    |
| <b>seq1015</b> | Firmicutes    | Erysipelotrichia | 0                  | 0                   | 0                   | 0                    |
| <b>seq598</b>  | Firmicutes    | Erysipelotrichia | 0                  | 16                  | 67                  | 28                   |
| <b>seq887</b>  | Firmicutes    | Erysipelotrichia | 0                  | 0                   | 48                  | 0                    |
| <b>seq969</b>  | Firmicutes    | Erysipelotrichia | 0                  | 0                   | 0                   | 0                    |
| <b>seq1030</b> | Firmicutes    | Erysipelotrichia | 0                  | 0                   | 0                   | 0                    |
| <b>seq1129</b> | Firmicutes    | Erysipelotrichia | 0                  | 0                   | 0                   | 0                    |
| <b>seq1035</b> | Firmicutes    | Erysipelotrichia | 0                  | 0                   | 0                   | 0                    |
| <b>seq1880</b> | Firmicutes    | Erysipelotrichia | 0                  | 0                   | 0                   | 0                    |
| <b>seq288</b>  | Firmicutes    | Erysipelotrichia | 0                  | 0                   | 122                 | 16                   |

Sequence Count Table

|                | <b>Phylum</b> | <b>Class</b>     | <b>Subject19WK0</b> | <b>Subject19WK12</b> | <b>Subject20WK0</b> | <b>Subject20WK12</b> |
|----------------|---------------|------------------|---------------------|----------------------|---------------------|----------------------|
| <b>seq1368</b> | Firmicutes    | Erysipelotrichia | 0                   | 0                    | 0                   | 0                    |
| <b>seq719</b>  | Firmicutes    | Erysipelotrichia | 0                   | 0                    | 0                   | 0                    |
| <b>seq195</b>  | Firmicutes    | Erysipelotrichia | 39                  | 0                    | 0                   | 0                    |
| <b>seq261</b>  | Firmicutes    | Erysipelotrichia | 0                   | 33                   | 0                   | 0                    |
| <b>seq434</b>  | Firmicutes    | Erysipelotrichia | 0                   | 0                    | 0                   | 0                    |
| <b>seq697</b>  | Firmicutes    | Erysipelotrichia | 0                   | 0                    | 0                   | 0                    |
| <b>seq1405</b> | Firmicutes    | Erysipelotrichia | 0                   | 0                    | 0                   | 0                    |
| <b>seq54</b>   | Firmicutes    | Erysipelotrichia | 1798                | 2065                 | 13                  | 36                   |
| <b>seq442</b>  | Firmicutes    | Erysipelotrichia | 0                   | 0                    | 0                   | 0                    |
| <b>seq653</b>  | Firmicutes    | Erysipelotrichia | 0                   | 0                    | 0                   | 0                    |
| <b>seq706</b>  | Firmicutes    | Erysipelotrichia | 0                   | 0                    | 0                   | 0                    |
| <b>seq1206</b> | Firmicutes    | Erysipelotrichia | 0                   | 0                    | 28                  | 50                   |
| <b>seq237</b>  | Firmicutes    | Erysipelotrichia | 0                   | 11                   | 0                   | 0                    |
| <b>seq729</b>  | Firmicutes    | Erysipelotrichia | 4                   | 33                   | 0                   | 0                    |
| <b>seq977</b>  | Firmicutes    | Erysipelotrichia | 0                   | 0                    | 0                   | 0                    |
| <b>seq1445</b> | Firmicutes    | Erysipelotrichia | 0                   | 0                    | 0                   | 0                    |
| <b>seq55</b>   | Firmicutes    | Erysipelotrichia | 0                   | 0                    | 506                 | 959                  |
| <b>seq186</b>  | Firmicutes    | Erysipelotrichia | 0                   | 0                    | 0                   | 218                  |
| <b>seq229</b>  | Firmicutes    | Erysipelotrichia | 0                   | 0                    | 0                   | 0                    |
| <b>seq408</b>  | Firmicutes    | Erysipelotrichia | 0                   | 0                    | 0                   | 0                    |
| <b>seq543</b>  | Firmicutes    | Erysipelotrichia | 0                   | 0                    | 0                   | 0                    |
| <b>seq667</b>  | Firmicutes    | Erysipelotrichia | 0                   | 0                    | 0                   | 0                    |
| <b>seq698</b>  | Firmicutes    | Erysipelotrichia | 0                   | 0                    | 0                   | 0                    |
| <b>seq1015</b> | Firmicutes    | Erysipelotrichia | 0                   | 0                    | 0                   | 0                    |
| <b>seq598</b>  | Firmicutes    | Erysipelotrichia | 0                   | 31                   | 0                   | 0                    |
| <b>seq887</b>  | Firmicutes    | Erysipelotrichia | 21                  | 21                   | 0                   | 0                    |
| <b>seq969</b>  | Firmicutes    | Erysipelotrichia | 0                   | 0                    | 0                   | 0                    |
| <b>seq1030</b> | Firmicutes    | Erysipelotrichia | 0                   | 0                    | 0                   | 0                    |
| <b>seq1129</b> | Firmicutes    | Erysipelotrichia | 0                   | 0                    | 0                   | 0                    |
| <b>seq1035</b> | Firmicutes    | Erysipelotrichia | 0                   | 0                    | 47                  | 82                   |
| <b>seq1880</b> | Firmicutes    | Erysipelotrichia | 0                   | 0                    | 0                   | 4                    |
| <b>seq288</b>  | Firmicutes    | Erysipelotrichia | 0                   | 42                   | 6                   | 0                    |



Sequence Count Table

|                | <b>Phylum</b> | <b>Class</b>     | <b>Subject7WK0</b> | <b>Subject7WK12</b> | <b>Subject21WK0</b> | <b>Subject21WK12</b> |
|----------------|---------------|------------------|--------------------|---------------------|---------------------|----------------------|
| <b>seq1368</b> | Firmicutes    | Erysipelotrichia | 0                  | 0                   | 0                   | 0                    |
| <b>seq719</b>  | Firmicutes    | Erysipelotrichia | 0                  | 0                   | 5                   | 10                   |
| <b>seq195</b>  | Firmicutes    | Erysipelotrichia | 112                | 154                 | 92                  | 349                  |
| <b>seq261</b>  | Firmicutes    | Erysipelotrichia | 376                | 103                 | 49                  | 676                  |
| <b>seq434</b>  | Firmicutes    | Erysipelotrichia | 347                | 0                   | 0                   | 0                    |
| <b>seq697</b>  | Firmicutes    | Erysipelotrichia | 0                  | 0                   | 0                   | 0                    |
| <b>seq1405</b> | Firmicutes    | Erysipelotrichia | 0                  | 0                   | 0                   | 0                    |
| <b>seq54</b>   | Firmicutes    | Erysipelotrichia | 0                  | 0                   | 0                   | 0                    |
| <b>seq442</b>  | Firmicutes    | Erysipelotrichia | 0                  | 0                   | 0                   | 0                    |
| <b>seq653</b>  | Firmicutes    | Erysipelotrichia | 0                  | 0                   | 0                   | 0                    |
| <b>seq706</b>  | Firmicutes    | Erysipelotrichia | 0                  | 0                   | 0                   | 0                    |
| <b>seq1206</b> | Firmicutes    | Erysipelotrichia | 0                  | 0                   | 0                   | 0                    |
| <b>seq237</b>  | Firmicutes    | Erysipelotrichia | 850                | 17                  | 65                  | 533                  |
| <b>seq729</b>  | Firmicutes    | Erysipelotrichia | 0                  | 0                   | 0                   | 0                    |
| <b>seq977</b>  | Firmicutes    | Erysipelotrichia | 0                  | 0                   | 0                   | 0                    |
| <b>seq1445</b> | Firmicutes    | Erysipelotrichia | 0                  | 0                   | 0                   | 0                    |
| <b>seq55</b>   | Firmicutes    | Erysipelotrichia | 0                  | 0                   | 0                   | 0                    |
| <b>seq186</b>  | Firmicutes    | Erysipelotrichia | 0                  | 0                   | 0                   | 0                    |
| <b>seq229</b>  | Firmicutes    | Erysipelotrichia | 0                  | 0                   | 0                   | 0                    |
| <b>seq408</b>  | Firmicutes    | Erysipelotrichia | 0                  | 0                   | 0                   | 0                    |
| <b>seq543</b>  | Firmicutes    | Erysipelotrichia | 0                  | 0                   | 0                   | 0                    |
| <b>seq667</b>  | Firmicutes    | Erysipelotrichia | 0                  | 0                   | 0                   | 0                    |
| <b>seq698</b>  | Firmicutes    | Erysipelotrichia | 0                  | 0                   | 0                   | 0                    |
| <b>seq1015</b> | Firmicutes    | Erysipelotrichia | 0                  | 0                   | 0                   | 0                    |
| <b>seq598</b>  | Firmicutes    | Erysipelotrichia | 16                 | 21                  | 0                   | 0                    |
| <b>seq887</b>  | Firmicutes    | Erysipelotrichia | 0                  | 0                   | 0                   | 0                    |
| <b>seq969</b>  | Firmicutes    | Erysipelotrichia | 0                  | 0                   | 0                   | 0                    |
| <b>seq1030</b> | Firmicutes    | Erysipelotrichia | 104                | 27                  | 0                   | 0                    |
| <b>seq1129</b> | Firmicutes    | Erysipelotrichia | 0                  | 0                   | 0                   | 0                    |
| <b>seq1035</b> | Firmicutes    | Erysipelotrichia | 0                  | 0                   | 0                   | 0                    |
| <b>seq1880</b> | Firmicutes    | Erysipelotrichia | 0                  | 0                   | 0                   | 0                    |
| <b>seq288</b>  | Firmicutes    | Erysipelotrichia | 0                  | 0                   | 0                   | 0                    |

Sequence Count Table

|                | <b>Phylum</b> | <b>Class</b>     | <b>Subject8WK0</b> | <b>Subject8WK12</b> | <b>Subject9WK0</b> | <b>Subject9WK12</b> |
|----------------|---------------|------------------|--------------------|---------------------|--------------------|---------------------|
| <b>seq1368</b> | Firmicutes    | Erysipelotrichia | 0                  | 0                   | 0                  | 0                   |
| <b>seq719</b>  | Firmicutes    | Erysipelotrichia | 0                  | 0                   | 0                  | 0                   |
| <b>seq195</b>  | Firmicutes    | Erysipelotrichia | 0                  | 0                   | 189                | 148                 |
| <b>seq261</b>  | Firmicutes    | Erysipelotrichia | 0                  | 0                   | 80                 | 10                  |
| <b>seq434</b>  | Firmicutes    | Erysipelotrichia | 0                  | 0                   | 0                  | 0                   |
| <b>seq697</b>  | Firmicutes    | Erysipelotrichia | 60                 | 95                  | 0                  | 0                   |
| <b>seq1405</b> | Firmicutes    | Erysipelotrichia | 0                  | 0                   | 0                  | 0                   |
| <b>seq54</b>   | Firmicutes    | Erysipelotrichia | 1536               | 1638                | 1735               | 360                 |
| <b>seq442</b>  | Firmicutes    | Erysipelotrichia | 0                  | 0                   | 0                  | 0                   |
| <b>seq653</b>  | Firmicutes    | Erysipelotrichia | 0                  | 0                   | 0                  | 0                   |
| <b>seq706</b>  | Firmicutes    | Erysipelotrichia | 0                  | 0                   | 0                  | 0                   |
| <b>seq1206</b> | Firmicutes    | Erysipelotrichia | 0                  | 0                   | 0                  | 0                   |
| <b>seq237</b>  | Firmicutes    | Erysipelotrichia | 0                  | 0                   | 536                | 163                 |
| <b>seq729</b>  | Firmicutes    | Erysipelotrichia | 0                  | 0                   | 0                  | 20                  |
| <b>seq977</b>  | Firmicutes    | Erysipelotrichia | 0                  | 0                   | 0                  | 0                   |
| <b>seq1445</b> | Firmicutes    | Erysipelotrichia | 0                  | 0                   | 0                  | 0                   |
| <b>seq55</b>   | Firmicutes    | Erysipelotrichia | 2651               | 4354                | 0                  | 0                   |
| <b>seq186</b>  | Firmicutes    | Erysipelotrichia | 0                  | 0                   | 0                  | 0                   |
| <b>seq229</b>  | Firmicutes    | Erysipelotrichia | 0                  | 0                   | 0                  | 0                   |
| <b>seq408</b>  | Firmicutes    | Erysipelotrichia | 568                | 642                 | 0                  | 0                   |
| <b>seq543</b>  | Firmicutes    | Erysipelotrichia | 0                  | 0                   | 0                  | 0                   |
| <b>seq667</b>  | Firmicutes    | Erysipelotrichia | 0                  | 0                   | 0                  | 0                   |
| <b>seq698</b>  | Firmicutes    | Erysipelotrichia | 0                  | 0                   | 0                  | 0                   |
| <b>seq1015</b> | Firmicutes    | Erysipelotrichia | 0                  | 0                   | 0                  | 0                   |
| <b>seq598</b>  | Firmicutes    | Erysipelotrichia | 0                  | 17                  | 41                 | 0                   |
| <b>seq887</b>  | Firmicutes    | Erysipelotrichia | 22                 | 0                   | 0                  | 0                   |
| <b>seq969</b>  | Firmicutes    | Erysipelotrichia | 0                  | 0                   | 0                  | 0                   |
| <b>seq1030</b> | Firmicutes    | Erysipelotrichia | 0                  | 0                   | 0                  | 0                   |
| <b>seq1129</b> | Firmicutes    | Erysipelotrichia | 0                  | 0                   | 0                  | 0                   |
| <b>seq1035</b> | Firmicutes    | Erysipelotrichia | 0                  | 0                   | 0                  | 0                   |
| <b>seq1880</b> | Firmicutes    | Erysipelotrichia | 0                  | 0                   | 0                  | 0                   |
| <b>seq288</b>  | Firmicutes    | Erysipelotrichia | 66                 | 0                   | 0                  | 0                   |

Sequence Count Table

|                | <b>Phylum</b> | <b>Class</b>     | <b>Subject10WK0</b> | <b>Subject10WK12</b> | <b>Subject22WK0</b> | <b>Subject22WK12</b> |
|----------------|---------------|------------------|---------------------|----------------------|---------------------|----------------------|
| <b>seq1368</b> | Firmicutes    | Erysipelotrichia | 0                   | 0                    | 0                   | 0                    |
| <b>seq719</b>  | Firmicutes    | Erysipelotrichia | 8                   | 0                    | 0                   | 0                    |
| <b>seq195</b>  | Firmicutes    | Erysipelotrichia | 609                 | 220                  | 0                   | 0                    |
| <b>seq261</b>  | Firmicutes    | Erysipelotrichia | 79                  | 42                   | 0                   | 0                    |
| <b>seq434</b>  | Firmicutes    | Erysipelotrichia | 0                   | 0                    | 0                   | 0                    |
| <b>seq697</b>  | Firmicutes    | Erysipelotrichia | 0                   | 0                    | 0                   | 0                    |
| <b>seq1405</b> | Firmicutes    | Erysipelotrichia | 0                   | 0                    | 0                   | 0                    |
| <b>seq54</b>   | Firmicutes    | Erysipelotrichia | 0                   | 0                    | 0                   | 44                   |
| <b>seq442</b>  | Firmicutes    | Erysipelotrichia | 0                   | 0                    | 0                   | 0                    |
| <b>seq653</b>  | Firmicutes    | Erysipelotrichia | 0                   | 0                    | 0                   | 0                    |
| <b>seq706</b>  | Firmicutes    | Erysipelotrichia | 0                   | 0                    | 0                   | 0                    |
| <b>seq1206</b> | Firmicutes    | Erysipelotrichia | 0                   | 0                    | 0                   | 0                    |
| <b>seq237</b>  | Firmicutes    | Erysipelotrichia | 0                   | 0                    | 0                   | 0                    |
| <b>seq729</b>  | Firmicutes    | Erysipelotrichia | 0                   | 0                    | 0                   | 0                    |
| <b>seq977</b>  | Firmicutes    | Erysipelotrichia | 0                   | 0                    | 0                   | 0                    |
| <b>seq1445</b> | Firmicutes    | Erysipelotrichia | 0                   | 0                    | 0                   | 0                    |
| <b>seq55</b>   | Firmicutes    | Erysipelotrichia | 0                   | 0                    | 1893                | 1286                 |
| <b>seq186</b>  | Firmicutes    | Erysipelotrichia | 0                   | 0                    | 0                   | 0                    |
| <b>seq229</b>  | Firmicutes    | Erysipelotrichia | 0                   | 0                    | 0                   | 0                    |
| <b>seq408</b>  | Firmicutes    | Erysipelotrichia | 0                   | 0                    | 0                   | 0                    |
| <b>seq543</b>  | Firmicutes    | Erysipelotrichia | 0                   | 0                    | 0                   | 0                    |
| <b>seq667</b>  | Firmicutes    | Erysipelotrichia | 0                   | 0                    | 0                   | 0                    |
| <b>seq698</b>  | Firmicutes    | Erysipelotrichia | 0                   | 0                    | 0                   | 0                    |
| <b>seq1015</b> | Firmicutes    | Erysipelotrichia | 0                   | 0                    | 0                   | 0                    |
| <b>seq598</b>  | Firmicutes    | Erysipelotrichia | 33                  | 0                    | 0                   | 0                    |
| <b>seq887</b>  | Firmicutes    | Erysipelotrichia | 0                   | 0                    | 6                   | 0                    |
| <b>seq969</b>  | Firmicutes    | Erysipelotrichia | 0                   | 0                    | 0                   | 0                    |
| <b>seq1030</b> | Firmicutes    | Erysipelotrichia | 0                   | 0                    | 0                   | 0                    |
| <b>seq1129</b> | Firmicutes    | Erysipelotrichia | 0                   | 0                    | 0                   | 0                    |
| <b>seq1035</b> | Firmicutes    | Erysipelotrichia | 0                   | 0                    | 0                   | 0                    |
| <b>seq1880</b> | Firmicutes    | Erysipelotrichia | 0                   | 0                    | 0                   | 0                    |
| <b>seq288</b>  | Firmicutes    | Erysipelotrichia | 0                   | 0                    | 0                   | 0                    |

Sequence Count Table

|                | <b>Phylum</b> | <b>Class</b>     | <b>Subject23WK0</b> | <b>Subject23WK12</b> | <b>Subject24WK0</b> | <b>Subject24WK12</b> |
|----------------|---------------|------------------|---------------------|----------------------|---------------------|----------------------|
| <b>seq1368</b> | Firmicutes    | Erysipelotrichia | 0                   | 0                    | 0                   | 0                    |
| <b>seq719</b>  | Firmicutes    | Erysipelotrichia | 0                   | 0                    | 0                   | 0                    |
| <b>seq195</b>  | Firmicutes    | Erysipelotrichia | 0                   | 0                    | 0                   | 34                   |
| <b>seq261</b>  | Firmicutes    | Erysipelotrichia | 0                   | 0                    | 104                 | 0                    |
| <b>seq434</b>  | Firmicutes    | Erysipelotrichia | 0                   | 0                    | 0                   | 0                    |
| <b>seq697</b>  | Firmicutes    | Erysipelotrichia | 0                   | 0                    | 0                   | 0                    |
| <b>seq1405</b> | Firmicutes    | Erysipelotrichia | 0                   | 0                    | 0                   | 0                    |
| <b>seq54</b>   | Firmicutes    | Erysipelotrichia | 95                  | 157                  | 599                 | 0                    |
| <b>seq442</b>  | Firmicutes    | Erysipelotrichia | 0                   | 0                    | 0                   | 0                    |
| <b>seq653</b>  | Firmicutes    | Erysipelotrichia | 0                   | 0                    | 0                   | 0                    |
| <b>seq706</b>  | Firmicutes    | Erysipelotrichia | 0                   | 0                    | 0                   | 0                    |
| <b>seq1206</b> | Firmicutes    | Erysipelotrichia | 0                   | 0                    | 0                   | 0                    |
| <b>seq237</b>  | Firmicutes    | Erysipelotrichia | 0                   | 0                    | 0                   | 0                    |
| <b>seq729</b>  | Firmicutes    | Erysipelotrichia | 0                   | 0                    | 0                   | 14                   |
| <b>seq977</b>  | Firmicutes    | Erysipelotrichia | 0                   | 0                    | 0                   | 0                    |
| <b>seq1445</b> | Firmicutes    | Erysipelotrichia | 0                   | 0                    | 0                   | 0                    |
| <b>seq55</b>   | Firmicutes    | Erysipelotrichia | 439                 | 1480                 | 0                   | 0                    |
| <b>seq186</b>  | Firmicutes    | Erysipelotrichia | 0                   | 0                    | 3538                | 0                    |
| <b>seq229</b>  | Firmicutes    | Erysipelotrichia | 0                   | 0                    | 0                   | 0                    |
| <b>seq408</b>  | Firmicutes    | Erysipelotrichia | 0                   | 0                    | 0                   | 0                    |
| <b>seq543</b>  | Firmicutes    | Erysipelotrichia | 0                   | 0                    | 0                   | 0                    |
| <b>seq667</b>  | Firmicutes    | Erysipelotrichia | 121                 | 314                  | 0                   | 0                    |
| <b>seq698</b>  | Firmicutes    | Erysipelotrichia | 0                   | 0                    | 0                   | 0                    |
| <b>seq1015</b> | Firmicutes    | Erysipelotrichia | 0                   | 138                  | 0                   | 0                    |
| <b>seq598</b>  | Firmicutes    | Erysipelotrichia | 9                   | 0                    | 0                   | 0                    |
| <b>seq887</b>  | Firmicutes    | Erysipelotrichia | 0                   | 0                    | 0                   | 0                    |
| <b>seq969</b>  | Firmicutes    | Erysipelotrichia | 0                   | 0                    | 11                  | 27                   |
| <b>seq1030</b> | Firmicutes    | Erysipelotrichia | 0                   | 0                    | 0                   | 0                    |
| <b>seq1129</b> | Firmicutes    | Erysipelotrichia | 0                   | 0                    | 0                   | 0                    |
| <b>seq1035</b> | Firmicutes    | Erysipelotrichia | 0                   | 0                    | 0                   | 0                    |
| <b>seq1880</b> | Firmicutes    | Erysipelotrichia | 0                   | 0                    | 0                   | 0                    |
| <b>seq288</b>  | Firmicutes    | Erysipelotrichia | 0                   | 45                   | 105                 | 17                   |

Sequence Count Table

|                | <b>Phylum</b> | <b>Class</b>     | <b>Subject11WK0</b> | <b>Subject11WK12</b> | <b>Subject12WK0</b> | <b>Subject12WK12</b> |
|----------------|---------------|------------------|---------------------|----------------------|---------------------|----------------------|
| <b>seq1368</b> | Firmicutes    | Erysipelotrichia | 0                   | 0                    | 0                   | 0                    |
| <b>seq719</b>  | Firmicutes    | Erysipelotrichia | 0                   | 0                    | 0                   | 0                    |
| <b>seq195</b>  | Firmicutes    | Erysipelotrichia | 241                 | 118                  | 0                   | 0                    |
| <b>seq261</b>  | Firmicutes    | Erysipelotrichia | 141                 | 0                    | 27                  | 0                    |
| <b>seq434</b>  | Firmicutes    | Erysipelotrichia | 227                 | 27                   | 0                   | 0                    |
| <b>seq697</b>  | Firmicutes    | Erysipelotrichia | 0                   | 0                    | 0                   | 0                    |
| <b>seq1405</b> | Firmicutes    | Erysipelotrichia | 0                   | 0                    | 0                   | 0                    |
| <b>seq54</b>   | Firmicutes    | Erysipelotrichia | 0                   | 0                    | 26                  | 46                   |
| <b>seq442</b>  | Firmicutes    | Erysipelotrichia | 0                   | 0                    | 0                   | 0                    |
| <b>seq653</b>  | Firmicutes    | Erysipelotrichia | 0                   | 0                    | 0                   | 0                    |
| <b>seq706</b>  | Firmicutes    | Erysipelotrichia | 0                   | 0                    | 0                   | 0                    |
| <b>seq1206</b> | Firmicutes    | Erysipelotrichia | 0                   | 0                    | 0                   | 0                    |
| <b>seq237</b>  | Firmicutes    | Erysipelotrichia | 0                   | 0                    | 0                   | 0                    |
| <b>seq729</b>  | Firmicutes    | Erysipelotrichia | 0                   | 0                    | 0                   | 0                    |
| <b>seq977</b>  | Firmicutes    | Erysipelotrichia | 0                   | 0                    | 0                   | 0                    |
| <b>seq1445</b> | Firmicutes    | Erysipelotrichia | 0                   | 0                    | 0                   | 0                    |
| <b>seq55</b>   | Firmicutes    | Erysipelotrichia | 0                   | 0                    | 696                 | 1426                 |
| <b>seq186</b>  | Firmicutes    | Erysipelotrichia | 0                   | 0                    | 0                   | 0                    |
| <b>seq229</b>  | Firmicutes    | Erysipelotrichia | 0                   | 0                    | 0                   | 0                    |
| <b>seq408</b>  | Firmicutes    | Erysipelotrichia | 0                   | 0                    | 0                   | 0                    |
| <b>seq543</b>  | Firmicutes    | Erysipelotrichia | 0                   | 0                    | 0                   | 0                    |
| <b>seq667</b>  | Firmicutes    | Erysipelotrichia | 0                   | 0                    | 0                   | 0                    |
| <b>seq698</b>  | Firmicutes    | Erysipelotrichia | 0                   | 0                    | 0                   | 0                    |
| <b>seq1015</b> | Firmicutes    | Erysipelotrichia | 0                   | 0                    | 0                   | 0                    |
| <b>seq598</b>  | Firmicutes    | Erysipelotrichia | 0                   | 0                    | 3                   | 6                    |
| <b>seq887</b>  | Firmicutes    | Erysipelotrichia | 0                   | 0                    | 0                   | 0                    |
| <b>seq969</b>  | Firmicutes    | Erysipelotrichia | 0                   | 0                    | 0                   | 0                    |
| <b>seq1030</b> | Firmicutes    | Erysipelotrichia | 0                   | 0                    | 0                   | 0                    |
| <b>seq1129</b> | Firmicutes    | Erysipelotrichia | 0                   | 0                    | 0                   | 0                    |
| <b>seq1035</b> | Firmicutes    | Erysipelotrichia | 0                   | 0                    | 0                   | 0                    |
| <b>seq1880</b> | Firmicutes    | Erysipelotrichia | 0                   | 0                    | 0                   | 0                    |
| <b>seq288</b>  | Firmicutes    | Erysipelotrichia | 0                   | 0                    | 0                   | 0                    |

Sequence Count Table

|                | <b>Phylum</b> | <b>Class</b>     | <b>Subject25WK0</b> | <b>Subject25WK12</b> | <b>Subject38WK0</b> | <b>Subject38WK12</b> |
|----------------|---------------|------------------|---------------------|----------------------|---------------------|----------------------|
| <b>seq1368</b> | Firmicutes    | Erysipelotrichia | 0                   | 0                    | 0                   | 0                    |
| <b>seq719</b>  | Firmicutes    | Erysipelotrichia | 0                   | 7                    | 0                   | 0                    |
| <b>seq195</b>  | Firmicutes    | Erysipelotrichia | 0                   | 0                    | 0                   | 0                    |
| <b>seq261</b>  | Firmicutes    | Erysipelotrichia | 15                  | 0                    | 0                   | 0                    |
| <b>seq434</b>  | Firmicutes    | Erysipelotrichia | 24                  | 0                    | 0                   | 0                    |
| <b>seq697</b>  | Firmicutes    | Erysipelotrichia | 0                   | 0                    | 0                   | 0                    |
| <b>seq1405</b> | Firmicutes    | Erysipelotrichia | 0                   | 0                    | 0                   | 0                    |
| <b>seq54</b>   | Firmicutes    | Erysipelotrichia | 54                  | 140                  | 0                   | 0                    |
| <b>seq442</b>  | Firmicutes    | Erysipelotrichia | 0                   | 0                    | 0                   | 0                    |
| <b>seq653</b>  | Firmicutes    | Erysipelotrichia | 0                   | 0                    | 0                   | 0                    |
| <b>seq706</b>  | Firmicutes    | Erysipelotrichia | 0                   | 0                    | 0                   | 0                    |
| <b>seq1206</b> | Firmicutes    | Erysipelotrichia | 0                   | 0                    | 0                   | 0                    |
| <b>seq237</b>  | Firmicutes    | Erysipelotrichia | 0                   | 0                    | 0                   | 0                    |
| <b>seq729</b>  | Firmicutes    | Erysipelotrichia | 0                   | 0                    | 0                   | 0                    |
| <b>seq977</b>  | Firmicutes    | Erysipelotrichia | 0                   | 0                    | 0                   | 0                    |
| <b>seq1445</b> | Firmicutes    | Erysipelotrichia | 0                   | 0                    | 0                   | 0                    |
| <b>seq55</b>   | Firmicutes    | Erysipelotrichia | 0                   | 0                    | 0                   | 0                    |
| <b>seq186</b>  | Firmicutes    | Erysipelotrichia | 0                   | 0                    | 0                   | 0                    |
| <b>seq229</b>  | Firmicutes    | Erysipelotrichia | 0                   | 0                    | 0                   | 0                    |
| <b>seq408</b>  | Firmicutes    | Erysipelotrichia | 0                   | 0                    | 0                   | 0                    |
| <b>seq543</b>  | Firmicutes    | Erysipelotrichia | 0                   | 0                    | 0                   | 0                    |
| <b>seq667</b>  | Firmicutes    | Erysipelotrichia | 0                   | 0                    | 0                   | 0                    |
| <b>seq698</b>  | Firmicutes    | Erysipelotrichia | 0                   | 0                    | 0                   | 0                    |
| <b>seq1015</b> | Firmicutes    | Erysipelotrichia | 0                   | 0                    | 0                   | 0                    |
| <b>seq598</b>  | Firmicutes    | Erysipelotrichia | 0                   | 0                    | 0                   | 0                    |
| <b>seq887</b>  | Firmicutes    | Erysipelotrichia | 0                   | 0                    | 0                   | 0                    |
| <b>seq969</b>  | Firmicutes    | Erysipelotrichia | 0                   | 0                    | 0                   | 0                    |
| <b>seq1030</b> | Firmicutes    | Erysipelotrichia | 0                   | 0                    | 0                   | 0                    |
| <b>seq1129</b> | Firmicutes    | Erysipelotrichia | 0                   | 0                    | 0                   | 0                    |
| <b>seq1035</b> | Firmicutes    | Erysipelotrichia | 0                   | 0                    | 0                   | 0                    |
| <b>seq1880</b> | Firmicutes    | Erysipelotrichia | 0                   | 0                    | 0                   | 0                    |
| <b>seq288</b>  | Firmicutes    | Erysipelotrichia | 0                   | 0                    | 0                   | 0                    |

Sequence Count Table

|                | <b>Phylum</b> | <b>Class</b>     | <b>Subject31WK0</b> | <b>Subject31WK12</b> | <b>Subject32WK0</b> | <b>Subject32WK12</b> |
|----------------|---------------|------------------|---------------------|----------------------|---------------------|----------------------|
| <b>seq1368</b> | Firmicutes    | Erysipelotrichia | 0                   | 0                    | 0                   | 0                    |
| <b>seq719</b>  | Firmicutes    | Erysipelotrichia | 0                   | 0                    | 0                   | 0                    |
| <b>seq195</b>  | Firmicutes    | Erysipelotrichia | 0                   | 0                    | 0                   | 0                    |
| <b>seq261</b>  | Firmicutes    | Erysipelotrichia | 0                   | 0                    | 0                   | 0                    |
| <b>seq434</b>  | Firmicutes    | Erysipelotrichia | 0                   | 0                    | 5                   | 0                    |
| <b>seq697</b>  | Firmicutes    | Erysipelotrichia | 0                   | 0                    | 0                   | 0                    |
| <b>seq1405</b> | Firmicutes    | Erysipelotrichia | 0                   | 0                    | 0                   | 0                    |
| <b>seq54</b>   | Firmicutes    | Erysipelotrichia | 0                   | 0                    | 1328                | 29                   |
| <b>seq442</b>  | Firmicutes    | Erysipelotrichia | 0                   | 0                    | 0                   | 0                    |
| <b>seq653</b>  | Firmicutes    | Erysipelotrichia | 0                   | 0                    | 0                   | 0                    |
| <b>seq706</b>  | Firmicutes    | Erysipelotrichia | 0                   | 0                    | 0                   | 0                    |
| <b>seq1206</b> | Firmicutes    | Erysipelotrichia | 0                   | 0                    | 0                   | 0                    |
| <b>seq237</b>  | Firmicutes    | Erysipelotrichia | 0                   | 0                    | 116                 | 0                    |
| <b>seq729</b>  | Firmicutes    | Erysipelotrichia | 0                   | 0                    | 0                   | 0                    |
| <b>seq977</b>  | Firmicutes    | Erysipelotrichia | 0                   | 0                    | 0                   | 0                    |
| <b>seq1445</b> | Firmicutes    | Erysipelotrichia | 0                   | 0                    | 0                   | 0                    |
| <b>seq55</b>   | Firmicutes    | Erysipelotrichia | 0                   | 0                    | 0                   | 0                    |
| <b>seq186</b>  | Firmicutes    | Erysipelotrichia | 0                   | 0                    | 0                   | 0                    |
| <b>seq229</b>  | Firmicutes    | Erysipelotrichia | 0                   | 0                    | 0                   | 0                    |
| <b>seq408</b>  | Firmicutes    | Erysipelotrichia | 0                   | 0                    | 0                   | 0                    |
| <b>seq543</b>  | Firmicutes    | Erysipelotrichia | 0                   | 0                    | 0                   | 0                    |
| <b>seq667</b>  | Firmicutes    | Erysipelotrichia | 0                   | 0                    | 0                   | 0                    |
| <b>seq698</b>  | Firmicutes    | Erysipelotrichia | 0                   | 0                    | 0                   | 0                    |
| <b>seq1015</b> | Firmicutes    | Erysipelotrichia | 0                   | 0                    | 0                   | 0                    |
| <b>seq598</b>  | Firmicutes    | Erysipelotrichia | 0                   | 0                    | 0                   | 0                    |
| <b>seq887</b>  | Firmicutes    | Erysipelotrichia | 0                   | 0                    | 0                   | 0                    |
| <b>seq969</b>  | Firmicutes    | Erysipelotrichia | 0                   | 0                    | 0                   | 0                    |
| <b>seq1030</b> | Firmicutes    | Erysipelotrichia | 0                   | 0                    | 0                   | 0                    |
| <b>seq1129</b> | Firmicutes    | Erysipelotrichia | 0                   | 0                    | 0                   | 0                    |
| <b>seq1035</b> | Firmicutes    | Erysipelotrichia | 0                   | 0                    | 0                   | 0                    |
| <b>seq1880</b> | Firmicutes    | Erysipelotrichia | 0                   | 0                    | 0                   | 0                    |
| <b>seq288</b>  | Firmicutes    | Erysipelotrichia | 0                   | 0                    | 12                  | 0                    |

Sequence Count Table

|                | <b>Phylum</b> | <b>Class</b>     | <b>Subject13WK0</b> | <b>Subject13WK12</b> | <b>Subject39WK0</b> | <b>Subject39WK12</b> |
|----------------|---------------|------------------|---------------------|----------------------|---------------------|----------------------|
| <b>seq1368</b> | Firmicutes    | Erysipelotrichia | 0                   | 0                    | 0                   | 0                    |
| <b>seq719</b>  | Firmicutes    | Erysipelotrichia | 0                   | 0                    | 0                   | 0                    |
| <b>seq195</b>  | Firmicutes    | Erysipelotrichia | 0                   | 0                    | 0                   | 0                    |
| <b>seq261</b>  | Firmicutes    | Erysipelotrichia | 84                  | 0                    | 0                   | 0                    |
| <b>seq434</b>  | Firmicutes    | Erysipelotrichia | 0                   | 0                    | 0                   | 0                    |
| <b>seq697</b>  | Firmicutes    | Erysipelotrichia | 0                   | 0                    | 0                   | 0                    |
| <b>seq1405</b> | Firmicutes    | Erysipelotrichia | 0                   | 0                    | 0                   | 0                    |
| <b>seq54</b>   | Firmicutes    | Erysipelotrichia | 89                  | 367                  | 0                   | 224                  |
| <b>seq442</b>  | Firmicutes    | Erysipelotrichia | 0                   | 0                    | 0                   | 0                    |
| <b>seq653</b>  | Firmicutes    | Erysipelotrichia | 0                   | 0                    | 0                   | 0                    |
| <b>seq706</b>  | Firmicutes    | Erysipelotrichia | 0                   | 0                    | 0                   | 0                    |
| <b>seq1206</b> | Firmicutes    | Erysipelotrichia | 0                   | 0                    | 0                   | 0                    |
| <b>seq237</b>  | Firmicutes    | Erysipelotrichia | 0                   | 137                  | 0                   | 22                   |
| <b>seq729</b>  | Firmicutes    | Erysipelotrichia | 0                   | 0                    | 0                   | 0                    |
| <b>seq977</b>  | Firmicutes    | Erysipelotrichia | 0                   | 0                    | 0                   | 0                    |
| <b>seq1445</b> | Firmicutes    | Erysipelotrichia | 0                   | 0                    | 0                   | 0                    |
| <b>seq55</b>   | Firmicutes    | Erysipelotrichia | 0                   | 0                    | 0                   | 0                    |
| <b>seq186</b>  | Firmicutes    | Erysipelotrichia | 0                   | 0                    | 0                   | 0                    |
| <b>seq229</b>  | Firmicutes    | Erysipelotrichia | 0                   | 0                    | 0                   | 0                    |
| <b>seq408</b>  | Firmicutes    | Erysipelotrichia | 0                   | 0                    | 0                   | 0                    |
| <b>seq543</b>  | Firmicutes    | Erysipelotrichia | 0                   | 0                    | 0                   | 0                    |
| <b>seq667</b>  | Firmicutes    | Erysipelotrichia | 0                   | 0                    | 0                   | 0                    |
| <b>seq698</b>  | Firmicutes    | Erysipelotrichia | 0                   | 0                    | 0                   | 0                    |
| <b>seq1015</b> | Firmicutes    | Erysipelotrichia | 0                   | 0                    | 0                   | 0                    |
| <b>seq598</b>  | Firmicutes    | Erysipelotrichia | 14                  | 0                    | 0                   | 0                    |
| <b>seq887</b>  | Firmicutes    | Erysipelotrichia | 0                   | 0                    | 0                   | 0                    |
| <b>seq969</b>  | Firmicutes    | Erysipelotrichia | 0                   | 0                    | 0                   | 11                   |
| <b>seq1030</b> | Firmicutes    | Erysipelotrichia | 0                   | 0                    | 0                   | 0                    |
| <b>seq1129</b> | Firmicutes    | Erysipelotrichia | 38                  | 0                    | 0                   | 0                    |
| <b>seq1035</b> | Firmicutes    | Erysipelotrichia | 0                   | 0                    | 0                   | 0                    |
| <b>seq1880</b> | Firmicutes    | Erysipelotrichia | 0                   | 0                    | 0                   | 0                    |
| <b>seq288</b>  | Firmicutes    | Erysipelotrichia | 213                 | 0                    | 0                   | 0                    |



Sequence Count Table

|                | <b>Phylum</b> | <b>Class</b>     | <b>Subject26WK0</b> | <b>Subject26WK12</b> | <b>Subject14WK0</b> | <b>Subject14WK12</b> |
|----------------|---------------|------------------|---------------------|----------------------|---------------------|----------------------|
| <b>seq1368</b> | Firmicutes    | Erysipelotrichia | 46                  | 0                    | 0                   | 0                    |
| <b>seq719</b>  | Firmicutes    | Erysipelotrichia | 0                   | 12                   | 0                   | 0                    |
| <b>seq195</b>  | Firmicutes    | Erysipelotrichia | 55                  | 26                   | 0                   | 291                  |
| <b>seq261</b>  | Firmicutes    | Erysipelotrichia | 30                  | 26                   | 0                   | 0                    |
| <b>seq434</b>  | Firmicutes    | Erysipelotrichia | 0                   | 0                    | 0                   | 0                    |
| <b>seq697</b>  | Firmicutes    | Erysipelotrichia | 0                   | 0                    | 0                   | 0                    |
| <b>seq1405</b> | Firmicutes    | Erysipelotrichia | 0                   | 0                    | 0                   | 0                    |
| <b>seq54</b>   | Firmicutes    | Erysipelotrichia | 85                  | 352                  | 0                   | 193                  |
| <b>seq442</b>  | Firmicutes    | Erysipelotrichia | 0                   | 0                    | 0                   | 0                    |
| <b>seq653</b>  | Firmicutes    | Erysipelotrichia | 0                   | 0                    | 0                   | 0                    |
| <b>seq706</b>  | Firmicutes    | Erysipelotrichia | 0                   | 0                    | 373                 | 0                    |
| <b>seq1206</b> | Firmicutes    | Erysipelotrichia | 0                   | 0                    | 0                   | 0                    |
| <b>seq237</b>  | Firmicutes    | Erysipelotrichia | 81                  | 285                  | 0                   | 0                    |
| <b>seq729</b>  | Firmicutes    | Erysipelotrichia | 0                   | 0                    | 0                   | 0                    |
| <b>seq977</b>  | Firmicutes    | Erysipelotrichia | 52                  | 100                  | 0                   | 0                    |
| <b>seq1445</b> | Firmicutes    | Erysipelotrichia | 0                   | 35                   | 0                   | 0                    |
| <b>seq55</b>   | Firmicutes    | Erysipelotrichia | 0                   | 0                    | 1045                | 978                  |
| <b>seq186</b>  | Firmicutes    | Erysipelotrichia | 0                   | 0                    | 0                   | 0                    |
| <b>seq229</b>  | Firmicutes    | Erysipelotrichia | 0                   | 0                    | 0                   | 0                    |
| <b>seq408</b>  | Firmicutes    | Erysipelotrichia | 0                   | 0                    | 0                   | 0                    |
| <b>seq543</b>  | Firmicutes    | Erysipelotrichia | 0                   | 0                    | 333                 | 321                  |
| <b>seq667</b>  | Firmicutes    | Erysipelotrichia | 0                   | 0                    | 0                   | 0                    |
| <b>seq698</b>  | Firmicutes    | Erysipelotrichia | 0                   | 0                    | 0                   | 0                    |
| <b>seq1015</b> | Firmicutes    | Erysipelotrichia | 0                   | 0                    | 0                   | 0                    |
| <b>seq598</b>  | Firmicutes    | Erysipelotrichia | 0                   | 0                    | 0                   | 0                    |
| <b>seq887</b>  | Firmicutes    | Erysipelotrichia | 23                  | 57                   | 0                   | 6                    |
| <b>seq969</b>  | Firmicutes    | Erysipelotrichia | 0                   | 0                    | 0                   | 0                    |
| <b>seq1030</b> | Firmicutes    | Erysipelotrichia | 0                   | 0                    | 0                   | 0                    |
| <b>seq1129</b> | Firmicutes    | Erysipelotrichia | 0                   | 0                    | 0                   | 0                    |
| <b>seq1035</b> | Firmicutes    | Erysipelotrichia | 0                   | 0                    | 0                   | 0                    |
| <b>seq1880</b> | Firmicutes    | Erysipelotrichia | 0                   | 0                    | 0                   | 0                    |
| <b>seq288</b>  | Firmicutes    | Erysipelotrichia | 0                   | 0                    | 19                  | 0                    |

Sequence Count Table

|                | <b>Phylum</b> | <b>Class</b>     | <b>Subject27WK0</b> | <b>Subject27WK12</b> | <b>Subject15WK0</b> | <b>Subject15WK12</b> |
|----------------|---------------|------------------|---------------------|----------------------|---------------------|----------------------|
| <b>seq1368</b> | Firmicutes    | Erysipelotrichia | 0                   | 0                    | 0                   | 0                    |
| <b>seq719</b>  | Firmicutes    | Erysipelotrichia | 0                   | 0                    | 0                   | 0                    |
| <b>seq195</b>  | Firmicutes    | Erysipelotrichia | 0                   | 0                    | 0                   | 0                    |
| <b>seq261</b>  | Firmicutes    | Erysipelotrichia | 0                   | 0                    | 0                   | 0                    |
| <b>seq434</b>  | Firmicutes    | Erysipelotrichia | 0                   | 0                    | 0                   | 0                    |
| <b>seq697</b>  | Firmicutes    | Erysipelotrichia | 99                  | 129                  | 0                   | 0                    |
| <b>seq1405</b> | Firmicutes    | Erysipelotrichia | 0                   | 0                    | 0                   | 0                    |
| <b>seq54</b>   | Firmicutes    | Erysipelotrichia | 1175                | 847                  | 841                 | 3899                 |
| <b>seq442</b>  | Firmicutes    | Erysipelotrichia | 0                   | 0                    | 0                   | 0                    |
| <b>seq653</b>  | Firmicutes    | Erysipelotrichia | 0                   | 0                    | 0                   | 0                    |
| <b>seq706</b>  | Firmicutes    | Erysipelotrichia | 0                   | 0                    | 0                   | 0                    |
| <b>seq1206</b> | Firmicutes    | Erysipelotrichia | 0                   | 0                    | 0                   | 0                    |
| <b>seq237</b>  | Firmicutes    | Erysipelotrichia | 0                   | 0                    | 0                   | 0                    |
| <b>seq729</b>  | Firmicutes    | Erysipelotrichia | 68                  | 109                  | 0                   | 0                    |
| <b>seq977</b>  | Firmicutes    | Erysipelotrichia | 0                   | 0                    | 0                   | 0                    |
| <b>seq1445</b> | Firmicutes    | Erysipelotrichia | 0                   | 0                    | 0                   | 0                    |
| <b>seq55</b>   | Firmicutes    | Erysipelotrichia | 0                   | 0                    | 2625                | 1851                 |
| <b>seq186</b>  | Firmicutes    | Erysipelotrichia | 0                   | 0                    | 0                   | 0                    |
| <b>seq229</b>  | Firmicutes    | Erysipelotrichia | 0                   | 0                    | 0                   | 0                    |
| <b>seq408</b>  | Firmicutes    | Erysipelotrichia | 0                   | 0                    | 0                   | 0                    |
| <b>seq543</b>  | Firmicutes    | Erysipelotrichia | 0                   | 0                    | 0                   | 0                    |
| <b>seq667</b>  | Firmicutes    | Erysipelotrichia | 0                   | 0                    | 0                   | 0                    |
| <b>seq698</b>  | Firmicutes    | Erysipelotrichia | 0                   | 0                    | 0                   | 0                    |
| <b>seq1015</b> | Firmicutes    | Erysipelotrichia | 0                   | 0                    | 0                   | 0                    |
| <b>seq598</b>  | Firmicutes    | Erysipelotrichia | 0                   | 0                    | 11                  | 15                   |
| <b>seq887</b>  | Firmicutes    | Erysipelotrichia | 0                   | 0                    | 0                   | 0                    |
| <b>seq969</b>  | Firmicutes    | Erysipelotrichia | 0                   | 0                    | 0                   | 0                    |
| <b>seq1030</b> | Firmicutes    | Erysipelotrichia | 0                   | 0                    | 0                   | 0                    |
| <b>seq1129</b> | Firmicutes    | Erysipelotrichia | 0                   | 0                    | 0                   | 0                    |
| <b>seq1035</b> | Firmicutes    | Erysipelotrichia | 0                   | 0                    | 0                   | 0                    |
| <b>seq1880</b> | Firmicutes    | Erysipelotrichia | 0                   | 0                    | 0                   | 0                    |
| <b>seq288</b>  | Firmicutes    | Erysipelotrichia | 0                   | 0                    | 50                  | 1633                 |

Sequence Count Table

|                | <b>Phylum</b> | <b>Class</b>     | <b>Δ</b> |  |  |  |
|----------------|---------------|------------------|----------|--|--|--|
| <b>seq1368</b> | Firmicutes    | Erysipelotrichia |          |  |  |  |
| <b>seq719</b>  | Firmicutes    | Erysipelotrichia |          |  |  |  |
| <b>seq195</b>  | Firmicutes    | Erysipelotrichia |          |  |  |  |
| <b>seq261</b>  | Firmicutes    | Erysipelotrichia |          |  |  |  |
| <b>seq434</b>  | Firmicutes    | Erysipelotrichia |          |  |  |  |
| <b>seq697</b>  | Firmicutes    | Erysipelotrichia |          |  |  |  |
| <b>seq1405</b> | Firmicutes    | Erysipelotrichia |          |  |  |  |
| <b>seq54</b>   | Firmicutes    | Erysipelotrichia |          |  |  |  |
| <b>seq442</b>  | Firmicutes    | Erysipelotrichia |          |  |  |  |
| <b>seq653</b>  | Firmicutes    | Erysipelotrichia |          |  |  |  |
| <b>seq706</b>  | Firmicutes    | Erysipelotrichia |          |  |  |  |
| <b>seq1206</b> | Firmicutes    | Erysipelotrichia |          |  |  |  |
| <b>seq237</b>  | Firmicutes    | Erysipelotrichia |          |  |  |  |
| <b>seq729</b>  | Firmicutes    | Erysipelotrichia |          |  |  |  |
| <b>seq977</b>  | Firmicutes    | Erysipelotrichia |          |  |  |  |
| <b>seq1445</b> | Firmicutes    | Erysipelotrichia |          |  |  |  |
| <b>seq55</b>   | Firmicutes    | Erysipelotrichia |          |  |  |  |
| <b>seq186</b>  | Firmicutes    | Erysipelotrichia |          |  |  |  |
| <b>seq229</b>  | Firmicutes    | Erysipelotrichia |          |  |  |  |
| <b>seq408</b>  | Firmicutes    | Erysipelotrichia |          |  |  |  |
| <b>seq543</b>  | Firmicutes    | Erysipelotrichia |          |  |  |  |
| <b>seq667</b>  | Firmicutes    | Erysipelotrichia |          |  |  |  |
| <b>seq698</b>  | Firmicutes    | Erysipelotrichia |          |  |  |  |
| <b>seq1015</b> | Firmicutes    | Erysipelotrichia |          |  |  |  |
| <b>seq598</b>  | Firmicutes    | Erysipelotrichia |          |  |  |  |
| <b>seq887</b>  | Firmicutes    | Erysipelotrichia |          |  |  |  |
| <b>seq969</b>  | Firmicutes    | Erysipelotrichia |          |  |  |  |
| <b>seq1030</b> | Firmicutes    | Erysipelotrichia |          |  |  |  |
| <b>seq1129</b> | Firmicutes    | Erysipelotrichia |          |  |  |  |
| <b>seq1035</b> | Firmicutes    | Erysipelotrichia |          |  |  |  |
| <b>seq1880</b> | Firmicutes    | Erysipelotrichia |          |  |  |  |
| <b>seq288</b>  | Firmicutes    | Erysipelotrichia |          |  |  |  |

Sequence Count Table

|                | <b>Phylum</b> | <b>Class</b>     | <b>Order</b>       | <b>Family</b>       |
|----------------|---------------|------------------|--------------------|---------------------|
| <b>seq485</b>  | Firmicutes    | Erysipelotrichia | Erysipelotrichales | Erysipelotrichaceae |
| <b>seq305</b>  | Firmicutes    | Erysipelotrichia | Erysipelotrichales | Erysipelotrichaceae |
| <b>seq554</b>  | Firmicutes    | Erysipelotrichia | Erysipelotrichales | Erysipelotrichaceae |
| <b>seq709</b>  | Firmicutes    | Erysipelotrichia | Erysipelotrichales | Erysipelotrichaceae |
| <b>seq996</b>  | Firmicutes    | Erysipelotrichia | Erysipelotrichales | Erysipelotrichaceae |
| <b>seq1004</b> | Firmicutes    | Erysipelotrichia | Erysipelotrichales | Erysipelotrichaceae |
| <b>seq1059</b> | Firmicutes    | Erysipelotrichia | Erysipelotrichales | Erysipelotrichaceae |
| <b>seq1112</b> | Firmicutes    | Erysipelotrichia | Erysipelotrichales | Erysipelotrichaceae |
| <b>seq1452</b> | Firmicutes    | Erysipelotrichia | Erysipelotrichales | Erysipelotrichaceae |
| <b>seq1755</b> | Firmicutes    | Erysipelotrichia | Erysipelotrichales | Erysipelotrichaceae |
| <b>seq1219</b> | Firmicutes    | Clostridia       | Clostridiales      | Eubacteriaceae      |
| <b>seq1406</b> | Firmicutes    | Clostridia       | Clostridiales      | Eubacteriaceae      |
| <b>seq1491</b> | Firmicutes    | Clostridia       | Clostridiales      | Eubacteriaceae      |
| <b>seq1753</b> | Firmicutes    | Clostridia       | Clostridiales      | Eubacteriaceae      |
| <b>seq1141</b> | Firmicutes    | Clostridia       | Clostridiales      | Eubacteriaceae      |
| <b>seq1572</b> | Firmicutes    | Clostridia       | Clostridiales      | Eubacteriaceae      |
| <b>seq829</b>  | Firmicutes    | Clostridia       | Clostridiales      | Family_XI           |
| <b>seq1734</b> | Firmicutes    | Clostridia       | Clostridiales      | Family_XI           |
| <b>seq1819</b> | Firmicutes    | Clostridia       | Clostridiales      | Family_XI           |
| <b>seq1268</b> | Firmicutes    | Clostridia       | Clostridiales      | Family_XI           |
| <b>seq1404</b> | Firmicutes    | Clostridia       | Clostridiales      | Family_XI           |
| <b>seq567</b>  | Firmicutes    | Clostridia       | Clostridiales      | Family_XI           |
| <b>seq916</b>  | Firmicutes    | Bacilli          | Bacillales         | Family_XI           |
| <b>seq1801</b> | Firmicutes    | Clostridia       | Clostridiales      | Family_XI           |
| <b>seq1896</b> | Firmicutes    | Clostridia       | Clostridiales      | Family_XI           |
| <b>seq1244</b> | Firmicutes    | Clostridia       | Clostridiales      | Family_XI           |
| <b>seq1643</b> | Firmicutes    | Clostridia       | Clostridiales      | Family_XI           |
| <b>seq1782</b> | Firmicutes    | Clostridia       | Clostridiales      | Family_XI           |
| <b>seq1051</b> | Firmicutes    | Clostridia       | Clostridiales      | Family_XI           |
| <b>seq1534</b> | Firmicutes    | Clostridia       | Clostridiales      | Family_XI           |
| <b>seq1535</b> | Firmicutes    | Clostridia       | Clostridiales      | Family_XI           |
| <b>seq1751</b> | Firmicutes    | Clostridia       | Clostridiales      | Family_XI           |

Sequence Count Table

|                | <b>Phylum</b> | <b>Class</b>     | <b>Genus</b>  | <b>Species</b>  |
|----------------|---------------|------------------|---------------|-----------------|
| <b>seq485</b>  | Firmicutes    | Erysipelotrichia | Turicibacter  | sanguinis       |
| <b>seq305</b>  | Firmicutes    | Erysipelotrichia |               |                 |
| <b>seq554</b>  | Firmicutes    | Erysipelotrichia |               |                 |
| <b>seq709</b>  | Firmicutes    | Erysipelotrichia |               |                 |
| <b>seq996</b>  | Firmicutes    | Erysipelotrichia |               |                 |
| <b>seq1004</b> | Firmicutes    | Erysipelotrichia |               |                 |
| <b>seq1059</b> | Firmicutes    | Erysipelotrichia |               |                 |
| <b>seq1112</b> | Firmicutes    | Erysipelotrichia |               |                 |
| <b>seq1452</b> | Firmicutes    | Erysipelotrichia |               |                 |
| <b>seq1755</b> | Firmicutes    | Erysipelotrichia |               |                 |
| <b>seq1219</b> | Firmicutes    | Clostridia       | Anaerofustis  |                 |
| <b>seq1406</b> | Firmicutes    | Clostridia       | Anaerofustis  | stercorihominis |
| <b>seq1491</b> | Firmicutes    | Clostridia       | Anaerofustis  |                 |
| <b>seq1753</b> | Firmicutes    | Clostridia       | Anaerofustis  |                 |
| <b>seq1141</b> | Firmicutes    | Clostridia       | Eubacterium   |                 |
| <b>seq1572</b> | Firmicutes    | Clostridia       | Eubacterium   | limosum         |
| <b>seq829</b>  | Firmicutes    | Clostridia       | Anaerococcus  | vaginalis       |
| <b>seq1734</b> | Firmicutes    | Clostridia       | Anaerococcus  |                 |
| <b>seq1819</b> | Firmicutes    | Clostridia       | Anaerococcus  |                 |
| <b>seq1268</b> | Firmicutes    | Clostridia       | Ezakiella     |                 |
| <b>seq1404</b> | Firmicutes    | Clostridia       | Ezakiella     |                 |
| <b>seq567</b>  | Firmicutes    | Clostridia       | Finegoldia    | magna           |
| <b>seq916</b>  | Firmicutes    | Bacilli          | Gemella       |                 |
| <b>seq1801</b> | Firmicutes    | Clostridia       | Murdochiella  | massiliensis    |
| <b>seq1896</b> | Firmicutes    | Clostridia       | Murdochiella  | asaccharolytica |
| <b>seq1244</b> | Firmicutes    | Clostridia       | Parvimonas    | micra           |
| <b>seq1643</b> | Firmicutes    | Clostridia       | Parvimonas    |                 |
| <b>seq1782</b> | Firmicutes    | Clostridia       | Parvimonas    |                 |
| <b>seq1051</b> | Firmicutes    | Clostridia       | Peptoniphilus |                 |
| <b>seq1534</b> | Firmicutes    | Clostridia       | Peptoniphilus | lacrimalis      |
| <b>seq1535</b> | Firmicutes    | Clostridia       | Peptoniphilus |                 |
| <b>seq1751</b> | Firmicutes    | Clostridia       | Peptoniphilus | coxii           |

Sequence Count Table

|                | <b>Phylum</b> | <b>Class</b>     | <b>Subject34WK0</b> | <b>Subject34WK12</b> | <b>Subject16WK0</b> | <b>Subject16WK12</b> |
|----------------|---------------|------------------|---------------------|----------------------|---------------------|----------------------|
| <b>seq485</b>  | Firmicutes    | Erysipelotrichia | 0                   | 0                    | 12                  | 0                    |
| <b>seq305</b>  | Firmicutes    | Erysipelotrichia | 0                   | 185                  | 0                   | 0                    |
| <b>seq554</b>  | Firmicutes    | Erysipelotrichia | 0                   | 0                    | 0                   | 0                    |
| <b>seq709</b>  | Firmicutes    | Erysipelotrichia | 0                   | 0                    | 0                   | 0                    |
| <b>seq996</b>  | Firmicutes    | Erysipelotrichia | 0                   | 0                    | 0                   | 0                    |
| <b>seq1004</b> | Firmicutes    | Erysipelotrichia | 0                   | 0                    | 0                   | 0                    |
| <b>seq1059</b> | Firmicutes    | Erysipelotrichia | 0                   | 0                    | 0                   | 0                    |
| <b>seq1112</b> | Firmicutes    | Erysipelotrichia | 0                   | 0                    | 0                   | 0                    |
| <b>seq1452</b> | Firmicutes    | Erysipelotrichia | 0                   | 0                    | 0                   | 0                    |
| <b>seq1755</b> | Firmicutes    | Erysipelotrichia | 0                   | 0                    | 0                   | 0                    |
| <b>seq1219</b> | Firmicutes    | Clostridia       | 0                   | 0                    | 0                   | 0                    |
| <b>seq1406</b> | Firmicutes    | Clostridia       | 0                   | 0                    | 0                   | 0                    |
| <b>seq1491</b> | Firmicutes    | Clostridia       | 0                   | 0                    | 0                   | 0                    |
| <b>seq1753</b> | Firmicutes    | Clostridia       | 0                   | 0                    | 0                   | 0                    |
| <b>seq1141</b> | Firmicutes    | Clostridia       | 0                   | 15                   | 0                   | 0                    |
| <b>seq1572</b> | Firmicutes    | Clostridia       | 0                   | 0                    | 0                   | 0                    |
| <b>seq829</b>  | Firmicutes    | Clostridia       | 0                   | 0                    | 0                   | 0                    |
| <b>seq1734</b> | Firmicutes    | Clostridia       | 0                   | 0                    | 0                   | 0                    |
| <b>seq1819</b> | Firmicutes    | Clostridia       | 0                   | 0                    | 0                   | 0                    |
| <b>seq1268</b> | Firmicutes    | Clostridia       | 0                   | 0                    | 0                   | 0                    |
| <b>seq1404</b> | Firmicutes    | Clostridia       | 0                   | 0                    | 0                   | 0                    |
| <b>seq567</b>  | Firmicutes    | Clostridia       | 0                   | 0                    | 0                   | 12                   |
| <b>seq916</b>  | Firmicutes    | Bacilli          | 0                   | 11                   | 0                   | 0                    |
| <b>seq1801</b> | Firmicutes    | Clostridia       | 0                   | 0                    | 0                   | 0                    |
| <b>seq1896</b> | Firmicutes    | Clostridia       | 0                   | 0                    | 0                   | 0                    |
| <b>seq1244</b> | Firmicutes    | Clostridia       | 0                   | 0                    | 0                   | 0                    |
| <b>seq1643</b> | Firmicutes    | Clostridia       | 0                   | 0                    | 0                   | 0                    |
| <b>seq1782</b> | Firmicutes    | Clostridia       | 0                   | 0                    | 0                   | 0                    |
| <b>seq1051</b> | Firmicutes    | Clostridia       | 0                   | 0                    | 0                   | 0                    |
| <b>seq1534</b> | Firmicutes    | Clostridia       | 0                   | 0                    | 0                   | 0                    |
| <b>seq1535</b> | Firmicutes    | Clostridia       | 0                   | 0                    | 0                   | 0                    |
| <b>seq1751</b> | Firmicutes    | Clostridia       | 0                   | 0                    | 0                   | 0                    |

Sequence Count Table

|                | <b>Phylum</b> | <b>Class</b>     | <b>Subject17WK0</b> | <b>Subject17WK12</b> | <b>Subject1WK0</b> | <b>Subject1WK12</b> |
|----------------|---------------|------------------|---------------------|----------------------|--------------------|---------------------|
| <b>seq485</b>  | Firmicutes    | Erysipelotrichia | 36                  | 24                   | 0                  | 0                   |
| <b>seq305</b>  | Firmicutes    | Erysipelotrichia | 0                   | 0                    | 0                  | 0                   |
| <b>seq554</b>  | Firmicutes    | Erysipelotrichia | 0                   | 0                    | 0                  | 0                   |
| <b>seq709</b>  | Firmicutes    | Erysipelotrichia | 27                  | 0                    | 0                  | 13                  |
| <b>seq996</b>  | Firmicutes    | Erysipelotrichia | 0                   | 0                    | 0                  | 0                   |
| <b>seq1004</b> | Firmicutes    | Erysipelotrichia | 0                   | 0                    | 0                  | 0                   |
| <b>seq1059</b> | Firmicutes    | Erysipelotrichia | 0                   | 0                    | 0                  | 0                   |
| <b>seq1112</b> | Firmicutes    | Erysipelotrichia | 0                   | 0                    | 0                  | 0                   |
| <b>seq1452</b> | Firmicutes    | Erysipelotrichia | 0                   | 0                    | 0                  | 0                   |
| <b>seq1755</b> | Firmicutes    | Erysipelotrichia | 0                   | 0                    | 0                  | 0                   |
| <b>seq1219</b> | Firmicutes    | Clostridia       | 0                   | 0                    | 0                  | 0                   |
| <b>seq1406</b> | Firmicutes    | Clostridia       | 0                   | 0                    | 0                  | 0                   |
| <b>seq1491</b> | Firmicutes    | Clostridia       | 0                   | 0                    | 0                  | 0                   |
| <b>seq1753</b> | Firmicutes    | Clostridia       | 0                   | 0                    | 0                  | 0                   |
| <b>seq1141</b> | Firmicutes    | Clostridia       | 0                   | 0                    | 0                  | 0                   |
| <b>seq1572</b> | Firmicutes    | Clostridia       | 0                   | 0                    | 0                  | 0                   |
| <b>seq829</b>  | Firmicutes    | Clostridia       | 0                   | 0                    | 0                  | 0                   |
| <b>seq1734</b> | Firmicutes    | Clostridia       | 0                   | 0                    | 0                  | 0                   |
| <b>seq1819</b> | Firmicutes    | Clostridia       | 0                   | 0                    | 0                  | 0                   |
| <b>seq1268</b> | Firmicutes    | Clostridia       | 10                  | 0                    | 0                  | 0                   |
| <b>seq1404</b> | Firmicutes    | Clostridia       | 6                   | 0                    | 0                  | 0                   |
| <b>seq567</b>  | Firmicutes    | Clostridia       | 0                   | 0                    | 0                  | 0                   |
| <b>seq916</b>  | Firmicutes    | Bacilli          | 0                   | 0                    | 0                  | 4                   |
| <b>seq1801</b> | Firmicutes    | Clostridia       | 0                   | 0                    | 0                  | 0                   |
| <b>seq1896</b> | Firmicutes    | Clostridia       | 0                   | 0                    | 0                  | 0                   |
| <b>seq1244</b> | Firmicutes    | Clostridia       | 0                   | 0                    | 0                  | 0                   |
| <b>seq1643</b> | Firmicutes    | Clostridia       | 0                   | 0                    | 0                  | 0                   |
| <b>seq1782</b> | Firmicutes    | Clostridia       | 0                   | 0                    | 0                  | 0                   |
| <b>seq1051</b> | Firmicutes    | Clostridia       | 0                   | 0                    | 0                  | 0                   |
| <b>seq1534</b> | Firmicutes    | Clostridia       | 0                   | 0                    | 0                  | 0                   |
| <b>seq1535</b> | Firmicutes    | Clostridia       | 0                   | 0                    | 0                  | 0                   |
| <b>seq1751</b> | Firmicutes    | Clostridia       | 0                   | 0                    | 0                  | 0                   |

Sequence Count Table

|                | <b>Phylum</b> | <b>Class</b>     | <b>Subject2WK0</b> | <b>Subject2WK12</b> | <b>Subject3WK0</b> | <b>Subject3WK12</b> |
|----------------|---------------|------------------|--------------------|---------------------|--------------------|---------------------|
| <b>seq485</b>  | Firmicutes    | Erysipelotrichia | 283                | 0                   | 0                  | 0                   |
| <b>seq305</b>  | Firmicutes    | Erysipelotrichia | 50                 | 0                   | 422                | 151                 |
| <b>seq554</b>  | Firmicutes    | Erysipelotrichia | 0                  | 0                   | 0                  | 0                   |
| <b>seq709</b>  | Firmicutes    | Erysipelotrichia | 0                  | 24                  | 0                  | 0                   |
| <b>seq996</b>  | Firmicutes    | Erysipelotrichia | 0                  | 0                   | 0                  | 0                   |
| <b>seq1004</b> | Firmicutes    | Erysipelotrichia | 0                  | 0                   | 0                  | 0                   |
| <b>seq1059</b> | Firmicutes    | Erysipelotrichia | 0                  | 0                   | 0                  | 0                   |
| <b>seq1112</b> | Firmicutes    | Erysipelotrichia | 0                  | 0                   | 0                  | 0                   |
| <b>seq1452</b> | Firmicutes    | Erysipelotrichia | 0                  | 0                   | 0                  | 0                   |
| <b>seq1755</b> | Firmicutes    | Erysipelotrichia | 0                  | 0                   | 0                  | 0                   |
| <b>seq1219</b> | Firmicutes    | Clostridia       | 0                  | 0                   | 0                  | 0                   |
| <b>seq1406</b> | Firmicutes    | Clostridia       | 0                  | 0                   | 0                  | 0                   |
| <b>seq1491</b> | Firmicutes    | Clostridia       | 0                  | 0                   | 21                 | 0                   |
| <b>seq1753</b> | Firmicutes    | Clostridia       | 0                  | 0                   | 0                  | 0                   |
| <b>seq1141</b> | Firmicutes    | Clostridia       | 0                  | 0                   | 0                  | 0                   |
| <b>seq1572</b> | Firmicutes    | Clostridia       | 0                  | 0                   | 0                  | 0                   |
| <b>seq829</b>  | Firmicutes    | Clostridia       | 0                  | 0                   | 0                  | 0                   |
| <b>seq1734</b> | Firmicutes    | Clostridia       | 0                  | 0                   | 0                  | 0                   |
| <b>seq1819</b> | Firmicutes    | Clostridia       | 0                  | 0                   | 0                  | 0                   |
| <b>seq1268</b> | Firmicutes    | Clostridia       | 0                  | 6                   | 0                  | 0                   |
| <b>seq1404</b> | Firmicutes    | Clostridia       | 0                  | 9                   | 0                  | 0                   |
| <b>seq567</b>  | Firmicutes    | Clostridia       | 0                  | 19                  | 0                  | 0                   |
| <b>seq916</b>  | Firmicutes    | Bacilli          | 0                  | 0                   | 17                 | 7                   |
| <b>seq1801</b> | Firmicutes    | Clostridia       | 0                  | 0                   | 0                  | 0                   |
| <b>seq1896</b> | Firmicutes    | Clostridia       | 0                  | 0                   | 0                  | 0                   |
| <b>seq1244</b> | Firmicutes    | Clostridia       | 0                  | 0                   | 0                  | 0                   |
| <b>seq1643</b> | Firmicutes    | Clostridia       | 0                  | 16                  | 0                  | 0                   |
| <b>seq1782</b> | Firmicutes    | Clostridia       | 0                  | 0                   | 0                  | 0                   |
| <b>seq1051</b> | Firmicutes    | Clostridia       | 0                  | 7                   | 0                  | 0                   |
| <b>seq1534</b> | Firmicutes    | Clostridia       | 0                  | 9                   | 0                  | 0                   |
| <b>seq1535</b> | Firmicutes    | Clostridia       | 0                  | 0                   | 0                  | 0                   |
| <b>seq1751</b> | Firmicutes    | Clostridia       | 0                  | 0                   | 0                  | 0                   |



Sequence Count Table

|                | <b>Phylum</b> | <b>Class</b>     | <b>Subject4WK0</b> | <b>Subject4WK12</b> | <b>Subject5WK0</b> | <b>Subject5WK12</b> |
|----------------|---------------|------------------|--------------------|---------------------|--------------------|---------------------|
| <b>seq485</b>  | Firmicutes    | Erysipelotrichia | 0                  | 0                   | 0                  | 36                  |
| <b>seq305</b>  | Firmicutes    | Erysipelotrichia | 0                  | 0                   | 45                 | 57                  |
| <b>seq554</b>  | Firmicutes    | Erysipelotrichia | 115                | 155                 | 0                  | 0                   |
| <b>seq709</b>  | Firmicutes    | Erysipelotrichia | 0                  | 40                  | 0                  | 0                   |
| <b>seq996</b>  | Firmicutes    | Erysipelotrichia | 0                  | 0                   | 0                  | 10                  |
| <b>seq1004</b> | Firmicutes    | Erysipelotrichia | 0                  | 0                   | 0                  | 0                   |
| <b>seq1059</b> | Firmicutes    | Erysipelotrichia | 0                  | 0                   | 0                  | 0                   |
| <b>seq1112</b> | Firmicutes    | Erysipelotrichia | 0                  | 0                   | 0                  | 0                   |
| <b>seq1452</b> | Firmicutes    | Erysipelotrichia | 0                  | 0                   | 0                  | 0                   |
| <b>seq1755</b> | Firmicutes    | Erysipelotrichia | 0                  | 0                   | 0                  | 0                   |
| <b>seq1219</b> | Firmicutes    | Clostridia       | 0                  | 0                   | 0                  | 0                   |
| <b>seq1406</b> | Firmicutes    | Clostridia       | 0                  | 0                   | 0                  | 11                  |
| <b>seq1491</b> | Firmicutes    | Clostridia       | 0                  | 0                   | 0                  | 0                   |
| <b>seq1753</b> | Firmicutes    | Clostridia       | 0                  | 0                   | 0                  | 0                   |
| <b>seq1141</b> | Firmicutes    | Clostridia       | 0                  | 0                   | 5                  | 0                   |
| <b>seq1572</b> | Firmicutes    | Clostridia       | 0                  | 0                   | 0                  | 0                   |
| <b>seq829</b>  | Firmicutes    | Clostridia       | 0                  | 0                   | 51                 | 191                 |
| <b>seq1734</b> | Firmicutes    | Clostridia       | 0                  | 0                   | 0                  | 0                   |
| <b>seq1819</b> | Firmicutes    | Clostridia       | 0                  | 0                   | 0                  | 0                   |
| <b>seq1268</b> | Firmicutes    | Clostridia       | 0                  | 0                   | 0                  | 5                   |
| <b>seq1404</b> | Firmicutes    | Clostridia       | 0                  | 0                   | 0                  | 0                   |
| <b>seq567</b>  | Firmicutes    | Clostridia       | 0                  | 7                   | 86                 | 464                 |
| <b>seq916</b>  | Firmicutes    | Bacilli          | 5                  | 8                   | 0                  | 0                   |
| <b>seq1801</b> | Firmicutes    | Clostridia       | 0                  | 0                   | 0                  | 0                   |
| <b>seq1896</b> | Firmicutes    | Clostridia       | 0                  | 2                   | 0                  | 0                   |
| <b>seq1244</b> | Firmicutes    | Clostridia       | 7                  | 0                   | 0                  | 0                   |
| <b>seq1643</b> | Firmicutes    | Clostridia       | 0                  | 0                   | 0                  | 0                   |
| <b>seq1782</b> | Firmicutes    | Clostridia       | 0                  | 0                   | 0                  | 0                   |
| <b>seq1051</b> | Firmicutes    | Clostridia       | 0                  | 0                   | 35                 | 65                  |
| <b>seq1534</b> | Firmicutes    | Clostridia       | 0                  | 0                   | 0                  | 0                   |
| <b>seq1535</b> | Firmicutes    | Clostridia       | 0                  | 0                   | 0                  | 16                  |
| <b>seq1751</b> | Firmicutes    | Clostridia       | 0                  | 0                   | 0                  | 0                   |

Sequence Count Table

|                | <b>Phylum</b> | <b>Class</b>     | <b>Subject6WK0</b> | <b>Subject6WK12</b> | <b>Subject18WK0</b> | <b>Subject18WK12</b> |
|----------------|---------------|------------------|--------------------|---------------------|---------------------|----------------------|
| <b>seq485</b>  | Firmicutes    | Erysipelotrichia | 20                 | 0                   | 0                   | 0                    |
| <b>seq305</b>  | Firmicutes    | Erysipelotrichia | 0                  | 9                   | 62                  | 30                   |
| <b>seq554</b>  | Firmicutes    | Erysipelotrichia | 0                  | 0                   | 58                  | 0                    |
| <b>seq709</b>  | Firmicutes    | Erysipelotrichia | 0                  | 0                   | 0                   | 0                    |
| <b>seq996</b>  | Firmicutes    | Erysipelotrichia | 0                  | 0                   | 0                   | 0                    |
| <b>seq1004</b> | Firmicutes    | Erysipelotrichia | 0                  | 0                   | 0                   | 0                    |
| <b>seq1059</b> | Firmicutes    | Erysipelotrichia | 0                  | 0                   | 0                   | 0                    |
| <b>seq1112</b> | Firmicutes    | Erysipelotrichia | 0                  | 0                   | 0                   | 0                    |
| <b>seq1452</b> | Firmicutes    | Erysipelotrichia | 0                  | 0                   | 0                   | 0                    |
| <b>seq1755</b> | Firmicutes    | Erysipelotrichia | 0                  | 0                   | 0                   | 0                    |
| <b>seq1219</b> | Firmicutes    | Clostridia       | 0                  | 0                   | 12                  | 0                    |
| <b>seq1406</b> | Firmicutes    | Clostridia       | 0                  | 0                   | 0                   | 0                    |
| <b>seq1491</b> | Firmicutes    | Clostridia       | 0                  | 0                   | 0                   | 0                    |
| <b>seq1753</b> | Firmicutes    | Clostridia       | 0                  | 0                   | 0                   | 0                    |
| <b>seq1141</b> | Firmicutes    | Clostridia       | 0                  | 0                   | 0                   | 6                    |
| <b>seq1572</b> | Firmicutes    | Clostridia       | 0                  | 0                   | 0                   | 0                    |
| <b>seq829</b>  | Firmicutes    | Clostridia       | 0                  | 0                   | 0                   | 0                    |
| <b>seq1734</b> | Firmicutes    | Clostridia       | 0                  | 0                   | 0                   | 0                    |
| <b>seq1819</b> | Firmicutes    | Clostridia       | 0                  | 0                   | 0                   | 0                    |
| <b>seq1268</b> | Firmicutes    | Clostridia       | 0                  | 0                   | 0                   | 0                    |
| <b>seq1404</b> | Firmicutes    | Clostridia       | 0                  | 0                   | 0                   | 0                    |
| <b>seq567</b>  | Firmicutes    | Clostridia       | 0                  | 0                   | 0                   | 0                    |
| <b>seq916</b>  | Firmicutes    | Bacilli          | 0                  | 0                   | 0                   | 5                    |
| <b>seq1801</b> | Firmicutes    | Clostridia       | 0                  | 0                   | 0                   | 0                    |
| <b>seq1896</b> | Firmicutes    | Clostridia       | 0                  | 0                   | 0                   | 0                    |
| <b>seq1244</b> | Firmicutes    | Clostridia       | 0                  | 0                   | 0                   | 0                    |
| <b>seq1643</b> | Firmicutes    | Clostridia       | 0                  | 0                   | 0                   | 0                    |
| <b>seq1782</b> | Firmicutes    | Clostridia       | 0                  | 0                   | 0                   | 0                    |
| <b>seq1051</b> | Firmicutes    | Clostridia       | 0                  | 0                   | 0                   | 0                    |
| <b>seq1534</b> | Firmicutes    | Clostridia       | 0                  | 0                   | 0                   | 0                    |
| <b>seq1535</b> | Firmicutes    | Clostridia       | 0                  | 0                   | 0                   | 0                    |
| <b>seq1751</b> | Firmicutes    | Clostridia       | 0                  | 0                   | 0                   | 0                    |

Sequence Count Table

|                | <b>Phylum</b> | <b>Class</b>     | <b>Subject19WK0</b> | <b>Subject19WK12</b> | <b>Subject20WK0</b> | <b>Subject20WK12</b> |
|----------------|---------------|------------------|---------------------|----------------------|---------------------|----------------------|
| <b>seq485</b>  | Firmicutes    | Erysipelotrichia | 0                   | 0                    | 0                   | 0                    |
| <b>seq305</b>  | Firmicutes    | Erysipelotrichia | 42                  | 40                   | 21                  | 0                    |
| <b>seq554</b>  | Firmicutes    | Erysipelotrichia | 0                   | 0                    | 0                   | 0                    |
| <b>seq709</b>  | Firmicutes    | Erysipelotrichia | 0                   | 0                    | 0                   | 0                    |
| <b>seq996</b>  | Firmicutes    | Erysipelotrichia | 0                   | 0                    | 0                   | 0                    |
| <b>seq1004</b> | Firmicutes    | Erysipelotrichia | 0                   | 0                    | 114                 | 28                   |
| <b>seq1059</b> | Firmicutes    | Erysipelotrichia | 0                   | 0                    | 0                   | 0                    |
| <b>seq1112</b> | Firmicutes    | Erysipelotrichia | 0                   | 0                    | 0                   | 0                    |
| <b>seq1452</b> | Firmicutes    | Erysipelotrichia | 0                   | 0                    | 0                   | 0                    |
| <b>seq1755</b> | Firmicutes    | Erysipelotrichia | 0                   | 0                    | 0                   | 0                    |
| <b>seq1219</b> | Firmicutes    | Clostridia       | 0                   | 0                    | 0                   | 0                    |
| <b>seq1406</b> | Firmicutes    | Clostridia       | 0                   | 0                    | 0                   | 0                    |
| <b>seq1491</b> | Firmicutes    | Clostridia       | 0                   | 0                    | 0                   | 0                    |
| <b>seq1753</b> | Firmicutes    | Clostridia       | 0                   | 0                    | 0                   | 0                    |
| <b>seq1141</b> | Firmicutes    | Clostridia       | 0                   | 0                    | 0                   | 0                    |
| <b>seq1572</b> | Firmicutes    | Clostridia       | 0                   | 0                    | 0                   | 0                    |
| <b>seq829</b>  | Firmicutes    | Clostridia       | 0                   | 0                    | 6                   | 0                    |
| <b>seq1734</b> | Firmicutes    | Clostridia       | 0                   | 0                    | 0                   | 0                    |
| <b>seq1819</b> | Firmicutes    | Clostridia       | 0                   | 0                    | 0                   | 0                    |
| <b>seq1268</b> | Firmicutes    | Clostridia       | 0                   | 0                    | 31                  | 0                    |
| <b>seq1404</b> | Firmicutes    | Clostridia       | 0                   | 0                    | 12                  | 0                    |
| <b>seq567</b>  | Firmicutes    | Clostridia       | 0                   | 0                    | 0                   | 0                    |
| <b>seq916</b>  | Firmicutes    | Bacilli          | 0                   | 0                    | 0                   | 28                   |
| <b>seq1801</b> | Firmicutes    | Clostridia       | 0                   | 0                    | 0                   | 0                    |
| <b>seq1896</b> | Firmicutes    | Clostridia       | 0                   | 0                    | 0                   | 0                    |
| <b>seq1244</b> | Firmicutes    | Clostridia       | 0                   | 0                    | 0                   | 34                   |
| <b>seq1643</b> | Firmicutes    | Clostridia       | 0                   | 0                    | 0                   | 0                    |
| <b>seq1782</b> | Firmicutes    | Clostridia       | 0                   | 0                    | 0                   | 0                    |
| <b>seq1051</b> | Firmicutes    | Clostridia       | 0                   | 0                    | 0                   | 0                    |
| <b>seq1534</b> | Firmicutes    | Clostridia       | 0                   | 0                    | 0                   | 0                    |
| <b>seq1535</b> | Firmicutes    | Clostridia       | 0                   | 0                    | 9                   | 0                    |
| <b>seq1751</b> | Firmicutes    | Clostridia       | 0                   | 0                    | 0                   | 0                    |

Sequence Count Table

|                | <b>Phylum</b> | <b>Class</b>     | <b>Subject7WK0</b> | <b>Subject7WK12</b> | <b>Subject21WK0</b> | <b>Subject21WK12</b> |
|----------------|---------------|------------------|--------------------|---------------------|---------------------|----------------------|
| <b>seq485</b>  | Firmicutes    | Erysipelotrichia | 0                  | 0                   | 0                   | 0                    |
| <b>seq305</b>  | Firmicutes    | Erysipelotrichia | 0                  | 16                  | 275                 | 467                  |
| <b>seq554</b>  | Firmicutes    | Erysipelotrichia | 0                  | 0                   | 0                   | 0                    |
| <b>seq709</b>  | Firmicutes    | Erysipelotrichia | 0                  | 0                   | 0                   | 0                    |
| <b>seq996</b>  | Firmicutes    | Erysipelotrichia | 60                 | 26                  | 0                   | 0                    |
| <b>seq1004</b> | Firmicutes    | Erysipelotrichia | 0                  | 0                   | 0                   | 0                    |
| <b>seq1059</b> | Firmicutes    | Erysipelotrichia | 0                  | 0                   | 0                   | 0                    |
| <b>seq1112</b> | Firmicutes    | Erysipelotrichia | 0                  | 0                   | 0                   | 0                    |
| <b>seq1452</b> | Firmicutes    | Erysipelotrichia | 0                  | 0                   | 0                   | 0                    |
| <b>seq1755</b> | Firmicutes    | Erysipelotrichia | 0                  | 0                   | 0                   | 0                    |
| <b>seq1219</b> | Firmicutes    | Clostridia       | 0                  | 0                   | 0                   | 0                    |
| <b>seq1406</b> | Firmicutes    | Clostridia       | 0                  | 3                   | 0                   | 0                    |
| <b>seq1491</b> | Firmicutes    | Clostridia       | 0                  | 0                   | 0                   | 0                    |
| <b>seq1753</b> | Firmicutes    | Clostridia       | 0                  | 0                   | 0                   | 0                    |
| <b>seq1141</b> | Firmicutes    | Clostridia       | 0                  | 0                   | 0                   | 0                    |
| <b>seq1572</b> | Firmicutes    | Clostridia       | 0                  | 0                   | 0                   | 0                    |
| <b>seq829</b>  | Firmicutes    | Clostridia       | 0                  | 0                   | 0                   | 0                    |
| <b>seq1734</b> | Firmicutes    | Clostridia       | 0                  | 0                   | 0                   | 0                    |
| <b>seq1819</b> | Firmicutes    | Clostridia       | 0                  | 0                   | 0                   | 0                    |
| <b>seq1268</b> | Firmicutes    | Clostridia       | 0                  | 0                   | 0                   | 0                    |
| <b>seq1404</b> | Firmicutes    | Clostridia       | 0                  | 0                   | 0                   | 0                    |
| <b>seq567</b>  | Firmicutes    | Clostridia       | 0                  | 0                   | 0                   | 0                    |
| <b>seq916</b>  | Firmicutes    | Bacilli          | 5                  | 0                   | 24                  | 0                    |
| <b>seq1801</b> | Firmicutes    | Clostridia       | 0                  | 0                   | 0                   | 0                    |
| <b>seq1896</b> | Firmicutes    | Clostridia       | 0                  | 0                   | 0                   | 0                    |
| <b>seq1244</b> | Firmicutes    | Clostridia       | 0                  | 0                   | 0                   | 0                    |
| <b>seq1643</b> | Firmicutes    | Clostridia       | 0                  | 0                   | 0                   | 0                    |
| <b>seq1782</b> | Firmicutes    | Clostridia       | 0                  | 0                   | 0                   | 0                    |
| <b>seq1051</b> | Firmicutes    | Clostridia       | 0                  | 0                   | 0                   | 0                    |
| <b>seq1534</b> | Firmicutes    | Clostridia       | 0                  | 0                   | 0                   | 0                    |
| <b>seq1535</b> | Firmicutes    | Clostridia       | 0                  | 0                   | 0                   | 0                    |
| <b>seq1751</b> | Firmicutes    | Clostridia       | 0                  | 0                   | 0                   | 0                    |

Sequence Count Table

|                | <b>Phylum</b> | <b>Class</b>     | <b>Subject8WK0</b> | <b>Subject8WK12</b> | <b>Subject9WK0</b> | <b>Subject9WK12</b> |
|----------------|---------------|------------------|--------------------|---------------------|--------------------|---------------------|
| <b>seq485</b>  | Firmicutes    | Erysipelotrichia | 0                  | 0                   | 0                  | 0                   |
| <b>seq305</b>  | Firmicutes    | Erysipelotrichia | 19                 | 0                   | 0                  | 0                   |
| <b>seq554</b>  | Firmicutes    | Erysipelotrichia | 0                  | 0                   | 0                  | 0                   |
| <b>seq709</b>  | Firmicutes    | Erysipelotrichia | 0                  | 12                  | 0                  | 0                   |
| <b>seq996</b>  | Firmicutes    | Erysipelotrichia | 0                  | 0                   | 11                 | 0                   |
| <b>seq1004</b> | Firmicutes    | Erysipelotrichia | 0                  | 0                   | 0                  | 0                   |
| <b>seq1059</b> | Firmicutes    | Erysipelotrichia | 0                  | 0                   | 83                 | 0                   |
| <b>seq1112</b> | Firmicutes    | Erysipelotrichia | 0                  | 0                   | 103                | 0                   |
| <b>seq1452</b> | Firmicutes    | Erysipelotrichia | 0                  | 0                   | 0                  | 0                   |
| <b>seq1755</b> | Firmicutes    | Erysipelotrichia | 0                  | 0                   | 0                  | 0                   |
| <b>seq1219</b> | Firmicutes    | Clostridia       | 0                  | 0                   | 0                  | 0                   |
| <b>seq1406</b> | Firmicutes    | Clostridia       | 3                  | 0                   | 0                  | 0                   |
| <b>seq1491</b> | Firmicutes    | Clostridia       | 0                  | 0                   | 0                  | 0                   |
| <b>seq1753</b> | Firmicutes    | Clostridia       | 0                  | 0                   | 0                  | 0                   |
| <b>seq1141</b> | Firmicutes    | Clostridia       | 0                  | 0                   | 0                  | 0                   |
| <b>seq1572</b> | Firmicutes    | Clostridia       | 0                  | 0                   | 0                  | 0                   |
| <b>seq829</b>  | Firmicutes    | Clostridia       | 0                  | 0                   | 0                  | 0                   |
| <b>seq1734</b> | Firmicutes    | Clostridia       | 0                  | 0                   | 0                  | 0                   |
| <b>seq1819</b> | Firmicutes    | Clostridia       | 0                  | 0                   | 0                  | 0                   |
| <b>seq1268</b> | Firmicutes    | Clostridia       | 0                  | 0                   | 0                  | 0                   |
| <b>seq1404</b> | Firmicutes    | Clostridia       | 0                  | 0                   | 0                  | 0                   |
| <b>seq567</b>  | Firmicutes    | Clostridia       | 0                  | 0                   | 0                  | 0                   |
| <b>seq916</b>  | Firmicutes    | Bacilli          | 0                  | 0                   | 0                  | 14                  |
| <b>seq1801</b> | Firmicutes    | Clostridia       | 0                  | 0                   | 0                  | 0                   |
| <b>seq1896</b> | Firmicutes    | Clostridia       | 0                  | 0                   | 0                  | 0                   |
| <b>seq1244</b> | Firmicutes    | Clostridia       | 0                  | 0                   | 0                  | 0                   |
| <b>seq1643</b> | Firmicutes    | Clostridia       | 0                  | 0                   | 0                  | 0                   |
| <b>seq1782</b> | Firmicutes    | Clostridia       | 0                  | 0                   | 0                  | 0                   |
| <b>seq1051</b> | Firmicutes    | Clostridia       | 0                  | 0                   | 0                  | 0                   |
| <b>seq1534</b> | Firmicutes    | Clostridia       | 0                  | 0                   | 0                  | 0                   |
| <b>seq1535</b> | Firmicutes    | Clostridia       | 0                  | 0                   | 0                  | 0                   |
| <b>seq1751</b> | Firmicutes    | Clostridia       | 0                  | 0                   | 0                  | 0                   |

Sequence Count Table

|                | <b>Phylum</b> | <b>Class</b>     | <b>Subject10WK0</b> | <b>Subject10WK12</b> | <b>Subject22WK0</b> | <b>Subject22WK12</b> |
|----------------|---------------|------------------|---------------------|----------------------|---------------------|----------------------|
| <b>seq485</b>  | Firmicutes    | Erysipelotrichia | 0                   | 0                    | 0                   | 10                   |
| <b>seq305</b>  | Firmicutes    | Erysipelotrichia | 0                   | 0                    | 0                   | 0                    |
| <b>seq554</b>  | Firmicutes    | Erysipelotrichia | 0                   | 0                    | 0                   | 0                    |
| <b>seq709</b>  | Firmicutes    | Erysipelotrichia | 93                  | 41                   | 0                   | 0                    |
| <b>seq996</b>  | Firmicutes    | Erysipelotrichia | 17                  | 0                    | 0                   | 0                    |
| <b>seq1004</b> | Firmicutes    | Erysipelotrichia | 0                   | 0                    | 0                   | 0                    |
| <b>seq1059</b> | Firmicutes    | Erysipelotrichia | 0                   | 0                    | 0                   | 0                    |
| <b>seq1112</b> | Firmicutes    | Erysipelotrichia | 0                   | 0                    | 0                   | 0                    |
| <b>seq1452</b> | Firmicutes    | Erysipelotrichia | 0                   | 0                    | 0                   | 0                    |
| <b>seq1755</b> | Firmicutes    | Erysipelotrichia | 0                   | 0                    | 0                   | 0                    |
| <b>seq1219</b> | Firmicutes    | Clostridia       | 0                   | 0                    | 0                   | 0                    |
| <b>seq1406</b> | Firmicutes    | Clostridia       | 7                   | 0                    | 0                   | 0                    |
| <b>seq1491</b> | Firmicutes    | Clostridia       | 0                   | 0                    | 0                   | 0                    |
| <b>seq1753</b> | Firmicutes    | Clostridia       | 0                   | 0                    | 6                   | 0                    |
| <b>seq1141</b> | Firmicutes    | Clostridia       | 0                   | 0                    | 0                   | 0                    |
| <b>seq1572</b> | Firmicutes    | Clostridia       | 0                   | 0                    | 0                   | 0                    |
| <b>seq829</b>  | Firmicutes    | Clostridia       | 0                   | 0                    | 0                   | 0                    |
| <b>seq1734</b> | Firmicutes    | Clostridia       | 0                   | 0                    | 0                   | 0                    |
| <b>seq1819</b> | Firmicutes    | Clostridia       | 0                   | 0                    | 0                   | 0                    |
| <b>seq1268</b> | Firmicutes    | Clostridia       | 0                   | 0                    | 0                   | 0                    |
| <b>seq1404</b> | Firmicutes    | Clostridia       | 0                   | 0                    | 0                   | 0                    |
| <b>seq567</b>  | Firmicutes    | Clostridia       | 0                   | 0                    | 0                   | 0                    |
| <b>seq916</b>  | Firmicutes    | Bacilli          | 11                  | 8                    | 0                   | 0                    |
| <b>seq1801</b> | Firmicutes    | Clostridia       | 0                   | 0                    | 0                   | 0                    |
| <b>seq1896</b> | Firmicutes    | Clostridia       | 0                   | 0                    | 0                   | 0                    |
| <b>seq1244</b> | Firmicutes    | Clostridia       | 0                   | 0                    | 0                   | 0                    |
| <b>seq1643</b> | Firmicutes    | Clostridia       | 0                   | 0                    | 0                   | 0                    |
| <b>seq1782</b> | Firmicutes    | Clostridia       | 0                   | 0                    | 0                   | 0                    |
| <b>seq1051</b> | Firmicutes    | Clostridia       | 0                   | 0                    | 0                   | 0                    |
| <b>seq1534</b> | Firmicutes    | Clostridia       | 0                   | 0                    | 0                   | 0                    |
| <b>seq1535</b> | Firmicutes    | Clostridia       | 0                   | 0                    | 0                   | 0                    |
| <b>seq1751</b> | Firmicutes    | Clostridia       | 0                   | 10                   | 0                   | 0                    |

Sequence Count Table

|                | <b>Phylum</b> | <b>Class</b>     | <b>Subject23WK0</b> | <b>Subject23WK12</b> | <b>Subject24WK0</b> | <b>Subject24WK12</b> |
|----------------|---------------|------------------|---------------------|----------------------|---------------------|----------------------|
| <b>seq485</b>  | Firmicutes    | Erysipelotrichia | 0                   | 0                    | 0                   | 0                    |
| <b>seq305</b>  | Firmicutes    | Erysipelotrichia | 0                   | 3                    | 5                   | 12                   |
| <b>seq554</b>  | Firmicutes    | Erysipelotrichia | 0                   | 0                    | 0                   | 0                    |
| <b>seq709</b>  | Firmicutes    | Erysipelotrichia | 0                   | 0                    | 0                   | 0                    |
| <b>seq996</b>  | Firmicutes    | Erysipelotrichia | 0                   | 0                    | 0                   | 0                    |
| <b>seq1004</b> | Firmicutes    | Erysipelotrichia | 0                   | 0                    | 0                   | 0                    |
| <b>seq1059</b> | Firmicutes    | Erysipelotrichia | 0                   | 0                    | 0                   | 0                    |
| <b>seq1112</b> | Firmicutes    | Erysipelotrichia | 0                   | 0                    | 0                   | 0                    |
| <b>seq1452</b> | Firmicutes    | Erysipelotrichia | 0                   | 0                    | 0                   | 0                    |
| <b>seq1755</b> | Firmicutes    | Erysipelotrichia | 0                   | 10                   | 0                   | 0                    |
| <b>seq1219</b> | Firmicutes    | Clostridia       | 0                   | 0                    | 0                   | 0                    |
| <b>seq1406</b> | Firmicutes    | Clostridia       | 0                   | 0                    | 0                   | 0                    |
| <b>seq1491</b> | Firmicutes    | Clostridia       | 0                   | 0                    | 0                   | 0                    |
| <b>seq1753</b> | Firmicutes    | Clostridia       | 0                   | 0                    | 0                   | 0                    |
| <b>seq1141</b> | Firmicutes    | Clostridia       | 0                   | 0                    | 0                   | 0                    |
| <b>seq1572</b> | Firmicutes    | Clostridia       | 0                   | 0                    | 0                   | 0                    |
| <b>seq829</b>  | Firmicutes    | Clostridia       | 0                   | 0                    | 0                   | 0                    |
| <b>seq1734</b> | Firmicutes    | Clostridia       | 0                   | 0                    | 0                   | 0                    |
| <b>seq1819</b> | Firmicutes    | Clostridia       | 0                   | 0                    | 0                   | 0                    |
| <b>seq1268</b> | Firmicutes    | Clostridia       | 0                   | 0                    | 0                   | 0                    |
| <b>seq1404</b> | Firmicutes    | Clostridia       | 0                   | 0                    | 0                   | 0                    |
| <b>seq567</b>  | Firmicutes    | Clostridia       | 0                   | 0                    | 0                   | 0                    |
| <b>seq916</b>  | Firmicutes    | Bacilli          | 0                   | 0                    | 0                   | 0                    |
| <b>seq1801</b> | Firmicutes    | Clostridia       | 0                   | 0                    | 0                   | 0                    |
| <b>seq1896</b> | Firmicutes    | Clostridia       | 0                   | 0                    | 0                   | 0                    |
| <b>seq1244</b> | Firmicutes    | Clostridia       | 0                   | 0                    | 0                   | 0                    |
| <b>seq1643</b> | Firmicutes    | Clostridia       | 0                   | 0                    | 0                   | 0                    |
| <b>seq1782</b> | Firmicutes    | Clostridia       | 0                   | 0                    | 0                   | 0                    |
| <b>seq1051</b> | Firmicutes    | Clostridia       | 0                   | 0                    | 0                   | 0                    |
| <b>seq1534</b> | Firmicutes    | Clostridia       | 0                   | 0                    | 0                   | 0                    |
| <b>seq1535</b> | Firmicutes    | Clostridia       | 0                   | 0                    | 0                   | 0                    |
| <b>seq1751</b> | Firmicutes    | Clostridia       | 0                   | 0                    | 0                   | 0                    |

Sequence Count Table

|                | <b>Phylum</b> | <b>Class</b>     | <b>Subject11WK0</b> | <b>Subject11WK12</b> | <b>Subject12WK0</b> | <b>Subject12WK12</b> |
|----------------|---------------|------------------|---------------------|----------------------|---------------------|----------------------|
| <b>seq485</b>  | Firmicutes    | Erysipelotrichia | 0                   | 0                    | 0                   | 0                    |
| <b>seq305</b>  | Firmicutes    | Erysipelotrichia | 81                  | 17                   | 0                   | 17                   |
| <b>seq554</b>  | Firmicutes    | Erysipelotrichia | 0                   | 0                    | 0                   | 0                    |
| <b>seq709</b>  | Firmicutes    | Erysipelotrichia | 0                   | 0                    | 0                   | 0                    |
| <b>seq996</b>  | Firmicutes    | Erysipelotrichia | 0                   | 0                    | 0                   | 0                    |
| <b>seq1004</b> | Firmicutes    | Erysipelotrichia | 0                   | 0                    | 0                   | 0                    |
| <b>seq1059</b> | Firmicutes    | Erysipelotrichia | 0                   | 0                    | 0                   | 0                    |
| <b>seq1112</b> | Firmicutes    | Erysipelotrichia | 0                   | 0                    | 0                   | 0                    |
| <b>seq1452</b> | Firmicutes    | Erysipelotrichia | 0                   | 0                    | 0                   | 0                    |
| <b>seq1755</b> | Firmicutes    | Erysipelotrichia | 0                   | 0                    | 0                   | 0                    |
| <b>seq1219</b> | Firmicutes    | Clostridia       | 0                   | 0                    | 0                   | 0                    |
| <b>seq1406</b> | Firmicutes    | Clostridia       | 7                   | 0                    | 0                   | 0                    |
| <b>seq1491</b> | Firmicutes    | Clostridia       | 0                   | 0                    | 0                   | 0                    |
| <b>seq1753</b> | Firmicutes    | Clostridia       | 0                   | 0                    | 0                   | 0                    |
| <b>seq1141</b> | Firmicutes    | Clostridia       | 0                   | 0                    | 0                   | 0                    |
| <b>seq1572</b> | Firmicutes    | Clostridia       | 16                  | 6                    | 0                   | 0                    |
| <b>seq829</b>  | Firmicutes    | Clostridia       | 0                   | 0                    | 0                   | 0                    |
| <b>seq1734</b> | Firmicutes    | Clostridia       | 0                   | 0                    | 0                   | 0                    |
| <b>seq1819</b> | Firmicutes    | Clostridia       | 0                   | 0                    | 0                   | 0                    |
| <b>seq1268</b> | Firmicutes    | Clostridia       | 0                   | 0                    | 0                   | 0                    |
| <b>seq1404</b> | Firmicutes    | Clostridia       | 0                   | 0                    | 0                   | 0                    |
| <b>seq567</b>  | Firmicutes    | Clostridia       | 0                   | 0                    | 0                   | 0                    |
| <b>seq916</b>  | Firmicutes    | Bacilli          | 0                   | 0                    | 0                   | 0                    |
| <b>seq1801</b> | Firmicutes    | Clostridia       | 0                   | 0                    | 0                   | 0                    |
| <b>seq1896</b> | Firmicutes    | Clostridia       | 0                   | 0                    | 0                   | 0                    |
| <b>seq1244</b> | Firmicutes    | Clostridia       | 0                   | 0                    | 0                   | 27                   |
| <b>seq1643</b> | Firmicutes    | Clostridia       | 0                   | 0                    | 0                   | 0                    |
| <b>seq1782</b> | Firmicutes    | Clostridia       | 0                   | 0                    | 0                   | 0                    |
| <b>seq1051</b> | Firmicutes    | Clostridia       | 0                   | 0                    | 0                   | 0                    |
| <b>seq1534</b> | Firmicutes    | Clostridia       | 0                   | 0                    | 0                   | 0                    |
| <b>seq1535</b> | Firmicutes    | Clostridia       | 0                   | 0                    | 0                   | 0                    |
| <b>seq1751</b> | Firmicutes    | Clostridia       | 0                   | 0                    | 0                   | 0                    |



Sequence Count Table

|                | <b>Phylum</b> | <b>Class</b>     | <b>Subject25WK0</b> | <b>Subject25WK12</b> | <b>Subject38WK0</b> | <b>Subject38WK12</b> |
|----------------|---------------|------------------|---------------------|----------------------|---------------------|----------------------|
| <b>seq485</b>  | Firmicutes    | Erysipelotrichia | 170                 | 18                   | 0                   | 0                    |
| <b>seq305</b>  | Firmicutes    | Erysipelotrichia | 0                   | 0                    | 0                   | 0                    |
| <b>seq554</b>  | Firmicutes    | Erysipelotrichia | 33                  | 0                    | 0                   | 0                    |
| <b>seq709</b>  | Firmicutes    | Erysipelotrichia | 0                   | 0                    | 0                   | 0                    |
| <b>seq996</b>  | Firmicutes    | Erysipelotrichia | 0                   | 0                    | 0                   | 0                    |
| <b>seq1004</b> | Firmicutes    | Erysipelotrichia | 0                   | 0                    | 0                   | 0                    |
| <b>seq1059</b> | Firmicutes    | Erysipelotrichia | 0                   | 0                    | 0                   | 0                    |
| <b>seq1112</b> | Firmicutes    | Erysipelotrichia | 0                   | 0                    | 0                   | 0                    |
| <b>seq1452</b> | Firmicutes    | Erysipelotrichia | 0                   | 28                   | 0                   | 0                    |
| <b>seq1755</b> | Firmicutes    | Erysipelotrichia | 0                   | 0                    | 0                   | 0                    |
| <b>seq1219</b> | Firmicutes    | Clostridia       | 0                   | 0                    | 0                   | 0                    |
| <b>seq1406</b> | Firmicutes    | Clostridia       | 5                   | 0                    | 0                   | 0                    |
| <b>seq1491</b> | Firmicutes    | Clostridia       | 0                   | 0                    | 0                   | 0                    |
| <b>seq1753</b> | Firmicutes    | Clostridia       | 0                   | 0                    | 0                   | 0                    |
| <b>seq1141</b> | Firmicutes    | Clostridia       | 0                   | 0                    | 0                   | 0                    |
| <b>seq1572</b> | Firmicutes    | Clostridia       | 0                   | 0                    | 0                   | 0                    |
| <b>seq829</b>  | Firmicutes    | Clostridia       | 0                   | 0                    | 0                   | 0                    |
| <b>seq1734</b> | Firmicutes    | Clostridia       | 0                   | 11                   | 0                   | 0                    |
| <b>seq1819</b> | Firmicutes    | Clostridia       | 0                   | 7                    | 0                   | 0                    |
| <b>seq1268</b> | Firmicutes    | Clostridia       | 0                   | 0                    | 0                   | 0                    |
| <b>seq1404</b> | Firmicutes    | Clostridia       | 0                   | 13                   | 0                   | 0                    |
| <b>seq567</b>  | Firmicutes    | Clostridia       | 0                   | 20                   | 0                   | 0                    |
| <b>seq916</b>  | Firmicutes    | Bacilli          | 0                   | 0                    | 0                   | 0                    |
| <b>seq1801</b> | Firmicutes    | Clostridia       | 0                   | 8                    | 0                   | 0                    |
| <b>seq1896</b> | Firmicutes    | Clostridia       | 0                   | 0                    | 0                   | 0                    |
| <b>seq1244</b> | Firmicutes    | Clostridia       | 0                   | 0                    | 0                   | 0                    |
| <b>seq1643</b> | Firmicutes    | Clostridia       | 0                   | 0                    | 0                   | 0                    |
| <b>seq1782</b> | Firmicutes    | Clostridia       | 0                   | 0                    | 0                   | 0                    |
| <b>seq1051</b> | Firmicutes    | Clostridia       | 0                   | 9                    | 0                   | 0                    |
| <b>seq1534</b> | Firmicutes    | Clostridia       | 0                   | 16                   | 0                   | 0                    |
| <b>seq1535</b> | Firmicutes    | Clostridia       | 0                   | 0                    | 0                   | 0                    |
| <b>seq1751</b> | Firmicutes    | Clostridia       | 0                   | 0                    | 0                   | 0                    |

Sequence Count Table

|                | <b>Phylum</b> | <b>Class</b>     | <b>Subject31WK0</b> | <b>Subject31WK12</b> | <b>Subject32WK0</b> | <b>Subject32WK12</b> |
|----------------|---------------|------------------|---------------------|----------------------|---------------------|----------------------|
| <b>seq485</b>  | Firmicutes    | Erysipelotrichia | 0                   | 0                    | 0                   | 0                    |
| <b>seq305</b>  | Firmicutes    | Erysipelotrichia | 0                   | 0                    | 0                   | 0                    |
| <b>seq554</b>  | Firmicutes    | Erysipelotrichia | 0                   | 0                    | 0                   | 0                    |
| <b>seq709</b>  | Firmicutes    | Erysipelotrichia | 0                   | 0                    | 0                   | 0                    |
| <b>seq996</b>  | Firmicutes    | Erysipelotrichia | 0                   | 0                    | 0                   | 0                    |
| <b>seq1004</b> | Firmicutes    | Erysipelotrichia | 0                   | 0                    | 0                   | 0                    |
| <b>seq1059</b> | Firmicutes    | Erysipelotrichia | 0                   | 0                    | 0                   | 0                    |
| <b>seq1112</b> | Firmicutes    | Erysipelotrichia | 0                   | 0                    | 0                   | 0                    |
| <b>seq1452</b> | Firmicutes    | Erysipelotrichia | 0                   | 0                    | 0                   | 0                    |
| <b>seq1755</b> | Firmicutes    | Erysipelotrichia | 0                   | 0                    | 0                   | 0                    |
| <b>seq1219</b> | Firmicutes    | Clostridia       | 0                   | 0                    | 0                   | 0                    |
| <b>seq1406</b> | Firmicutes    | Clostridia       | 0                   | 0                    | 4                   | 0                    |
| <b>seq1491</b> | Firmicutes    | Clostridia       | 0                   | 0                    | 0                   | 0                    |
| <b>seq1753</b> | Firmicutes    | Clostridia       | 0                   | 0                    | 0                   | 0                    |
| <b>seq1141</b> | Firmicutes    | Clostridia       | 0                   | 0                    | 0                   | 0                    |
| <b>seq1572</b> | Firmicutes    | Clostridia       | 0                   | 0                    | 0                   | 0                    |
| <b>seq829</b>  | Firmicutes    | Clostridia       | 0                   | 0                    | 0                   | 0                    |
| <b>seq1734</b> | Firmicutes    | Clostridia       | 0                   | 0                    | 0                   | 0                    |
| <b>seq1819</b> | Firmicutes    | Clostridia       | 0                   | 0                    | 0                   | 0                    |
| <b>seq1268</b> | Firmicutes    | Clostridia       | 0                   | 0                    | 0                   | 0                    |
| <b>seq1404</b> | Firmicutes    | Clostridia       | 0                   | 0                    | 0                   | 0                    |
| <b>seq567</b>  | Firmicutes    | Clostridia       | 0                   | 0                    | 0                   | 0                    |
| <b>seq916</b>  | Firmicutes    | Bacilli          | 0                   | 0                    | 0                   | 0                    |
| <b>seq1801</b> | Firmicutes    | Clostridia       | 0                   | 0                    | 0                   | 0                    |
| <b>seq1896</b> | Firmicutes    | Clostridia       | 0                   | 0                    | 0                   | 0                    |
| <b>seq1244</b> | Firmicutes    | Clostridia       | 0                   | 0                    | 0                   | 0                    |
| <b>seq1643</b> | Firmicutes    | Clostridia       | 0                   | 0                    | 0                   | 0                    |
| <b>seq1782</b> | Firmicutes    | Clostridia       | 0                   | 0                    | 0                   | 0                    |
| <b>seq1051</b> | Firmicutes    | Clostridia       | 0                   | 0                    | 0                   | 0                    |
| <b>seq1534</b> | Firmicutes    | Clostridia       | 0                   | 0                    | 0                   | 0                    |
| <b>seq1535</b> | Firmicutes    | Clostridia       | 0                   | 0                    | 0                   | 0                    |
| <b>seq1751</b> | Firmicutes    | Clostridia       | 0                   | 0                    | 0                   | 0                    |

Sequence Count Table

|                | <b>Phylum</b> | <b>Class</b>     | <b>Subject13WK0</b> | <b>Subject13WK12</b> | <b>Subject39WK0</b> | <b>Subject39WK12</b> |
|----------------|---------------|------------------|---------------------|----------------------|---------------------|----------------------|
| <b>seq485</b>  | Firmicutes    | Erysipelotrichia | 0                   | 0                    | 0                   | 12                   |
| <b>seq305</b>  | Firmicutes    | Erysipelotrichia | 0                   | 0                    | 0                   | 0                    |
| <b>seq554</b>  | Firmicutes    | Erysipelotrichia | 167                 | 102                  | 0                   | 0                    |
| <b>seq709</b>  | Firmicutes    | Erysipelotrichia | 0                   | 0                    | 0                   | 0                    |
| <b>seq996</b>  | Firmicutes    | Erysipelotrichia | 20                  | 0                    | 0                   | 0                    |
| <b>seq1004</b> | Firmicutes    | Erysipelotrichia | 0                   | 0                    | 0                   | 0                    |
| <b>seq1059</b> | Firmicutes    | Erysipelotrichia | 38                  | 0                    | 0                   | 0                    |
| <b>seq1112</b> | Firmicutes    | Erysipelotrichia | 0                   | 0                    | 0                   | 0                    |
| <b>seq1452</b> | Firmicutes    | Erysipelotrichia | 0                   | 0                    | 0                   | 0                    |
| <b>seq1755</b> | Firmicutes    | Erysipelotrichia | 0                   | 0                    | 0                   | 0                    |
| <b>seq1219</b> | Firmicutes    | Clostridia       | 39                  | 23                   | 0                   | 0                    |
| <b>seq1406</b> | Firmicutes    | Clostridia       | 0                   | 0                    | 0                   | 0                    |
| <b>seq1491</b> | Firmicutes    | Clostridia       | 0                   | 0                    | 0                   | 0                    |
| <b>seq1753</b> | Firmicutes    | Clostridia       | 0                   | 4                    | 0                   | 0                    |
| <b>seq1141</b> | Firmicutes    | Clostridia       | 0                   | 0                    | 0                   | 0                    |
| <b>seq1572</b> | Firmicutes    | Clostridia       | 0                   | 0                    | 0                   | 0                    |
| <b>seq829</b>  | Firmicutes    | Clostridia       | 0                   | 0                    | 0                   | 0                    |
| <b>seq1734</b> | Firmicutes    | Clostridia       | 0                   | 0                    | 0                   | 0                    |
| <b>seq1819</b> | Firmicutes    | Clostridia       | 0                   | 0                    | 0                   | 0                    |
| <b>seq1268</b> | Firmicutes    | Clostridia       | 0                   | 0                    | 0                   | 11                   |
| <b>seq1404</b> | Firmicutes    | Clostridia       | 0                   | 0                    | 0                   | 0                    |
| <b>seq567</b>  | Firmicutes    | Clostridia       | 0                   | 0                    | 0                   | 0                    |
| <b>seq916</b>  | Firmicutes    | Bacilli          | 0                   | 0                    | 0                   | 5                    |
| <b>seq1801</b> | Firmicutes    | Clostridia       | 0                   | 0                    | 0                   | 0                    |
| <b>seq1896</b> | Firmicutes    | Clostridia       | 0                   | 0                    | 0                   | 0                    |
| <b>seq1244</b> | Firmicutes    | Clostridia       | 0                   | 0                    | 0                   | 0                    |
| <b>seq1643</b> | Firmicutes    | Clostridia       | 0                   | 0                    | 0                   | 0                    |
| <b>seq1782</b> | Firmicutes    | Clostridia       | 0                   | 0                    | 0                   | 0                    |
| <b>seq1051</b> | Firmicutes    | Clostridia       | 0                   | 0                    | 0                   | 0                    |
| <b>seq1534</b> | Firmicutes    | Clostridia       | 0                   | 0                    | 0                   | 0                    |
| <b>seq1535</b> | Firmicutes    | Clostridia       | 0                   | 0                    | 0                   | 0                    |
| <b>seq1751</b> | Firmicutes    | Clostridia       | 0                   | 0                    | 0                   | 0                    |

Sequence Count Table

|                | <b>Phylum</b> | <b>Class</b>     | <b>Subject26WK0</b> | <b>Subject26WK12</b> | <b>Subject14WK0</b> | <b>Subject14WK12</b> |
|----------------|---------------|------------------|---------------------|----------------------|---------------------|----------------------|
| <b>seq485</b>  | Firmicutes    | Erysipelotrichia | 0                   | 0                    | 0                   | 62                   |
| <b>seq305</b>  | Firmicutes    | Erysipelotrichia | 0                   | 76                   | 0                   | 0                    |
| <b>seq554</b>  | Firmicutes    | Erysipelotrichia | 0                   | 0                    | 0                   | 0                    |
| <b>seq709</b>  | Firmicutes    | Erysipelotrichia | 41                  | 74                   | 0                   | 0                    |
| <b>seq996</b>  | Firmicutes    | Erysipelotrichia | 0                   | 0                    | 0                   | 0                    |
| <b>seq1004</b> | Firmicutes    | Erysipelotrichia | 0                   | 0                    | 0                   | 0                    |
| <b>seq1059</b> | Firmicutes    | Erysipelotrichia | 0                   | 0                    | 0                   | 0                    |
| <b>seq1112</b> | Firmicutes    | Erysipelotrichia | 0                   | 0                    | 0                   | 0                    |
| <b>seq1452</b> | Firmicutes    | Erysipelotrichia | 0                   | 0                    | 0                   | 6                    |
| <b>seq1755</b> | Firmicutes    | Erysipelotrichia | 0                   | 0                    | 0                   | 0                    |
| <b>seq1219</b> | Firmicutes    | Clostridia       | 0                   | 0                    | 0                   | 0                    |
| <b>seq1406</b> | Firmicutes    | Clostridia       | 0                   | 0                    | 0                   | 0                    |
| <b>seq1491</b> | Firmicutes    | Clostridia       | 8                   | 0                    | 0                   | 0                    |
| <b>seq1753</b> | Firmicutes    | Clostridia       | 0                   | 0                    | 0                   | 0                    |
| <b>seq1141</b> | Firmicutes    | Clostridia       | 63                  | 5                    | 0                   | 0                    |
| <b>seq1572</b> | Firmicutes    | Clostridia       | 0                   | 0                    | 0                   | 0                    |
| <b>seq829</b>  | Firmicutes    | Clostridia       | 0                   | 0                    | 0                   | 0                    |
| <b>seq1734</b> | Firmicutes    | Clostridia       | 0                   | 0                    | 0                   | 0                    |
| <b>seq1819</b> | Firmicutes    | Clostridia       | 0                   | 0                    | 0                   | 0                    |
| <b>seq1268</b> | Firmicutes    | Clostridia       | 0                   | 0                    | 0                   | 0                    |
| <b>seq1404</b> | Firmicutes    | Clostridia       | 0                   | 0                    | 0                   | 0                    |
| <b>seq567</b>  | Firmicutes    | Clostridia       | 0                   | 0                    | 0                   | 0                    |
| <b>seq916</b>  | Firmicutes    | Bacilli          | 0                   | 0                    | 0                   | 0                    |
| <b>seq1801</b> | Firmicutes    | Clostridia       | 0                   | 0                    | 0                   | 0                    |
| <b>seq1896</b> | Firmicutes    | Clostridia       | 0                   | 0                    | 0                   | 0                    |
| <b>seq1244</b> | Firmicutes    | Clostridia       | 0                   | 0                    | 0                   | 0                    |
| <b>seq1643</b> | Firmicutes    | Clostridia       | 0                   | 0                    | 0                   | 0                    |
| <b>seq1782</b> | Firmicutes    | Clostridia       | 0                   | 0                    | 0                   | 9                    |
| <b>seq1051</b> | Firmicutes    | Clostridia       | 0                   | 8                    | 0                   | 0                    |
| <b>seq1534</b> | Firmicutes    | Clostridia       | 0                   | 0                    | 0                   | 0                    |
| <b>seq1535</b> | Firmicutes    | Clostridia       | 0                   | 0                    | 0                   | 0                    |
| <b>seq1751</b> | Firmicutes    | Clostridia       | 0                   | 0                    | 0                   | 0                    |

Sequence Count Table

|                | <b>Phylum</b> | <b>Class</b>     | <b>Subject27WK0</b> | <b>Subject27WK12</b> | <b>Subject15WK0</b> | <b>Subject15WK12</b> |
|----------------|---------------|------------------|---------------------|----------------------|---------------------|----------------------|
| <b>seq485</b>  | Firmicutes    | Erysipelotrichia | 0                   | 0                    | 0                   | 131                  |
| <b>seq305</b>  | Firmicutes    | Erysipelotrichia | 20                  | 20                   | 0                   | 0                    |
| <b>seq554</b>  | Firmicutes    | Erysipelotrichia | 0                   | 0                    | 0                   | 0                    |
| <b>seq709</b>  | Firmicutes    | Erysipelotrichia | 0                   | 0                    | 0                   | 0                    |
| <b>seq996</b>  | Firmicutes    | Erysipelotrichia | 0                   | 0                    | 0                   | 0                    |
| <b>seq1004</b> | Firmicutes    | Erysipelotrichia | 0                   | 0                    | 0                   | 0                    |
| <b>seq1059</b> | Firmicutes    | Erysipelotrichia | 0                   | 0                    | 0                   | 0                    |
| <b>seq1112</b> | Firmicutes    | Erysipelotrichia | 0                   | 0                    | 0                   | 0                    |
| <b>seq1452</b> | Firmicutes    | Erysipelotrichia | 0                   | 0                    | 0                   | 0                    |
| <b>seq1755</b> | Firmicutes    | Erysipelotrichia | 0                   | 0                    | 0                   | 0                    |
| <b>seq1219</b> | Firmicutes    | Clostridia       | 0                   | 0                    | 0                   | 0                    |
| <b>seq1406</b> | Firmicutes    | Clostridia       | 0                   | 0                    | 0                   | 0                    |
| <b>seq1491</b> | Firmicutes    | Clostridia       | 0                   | 0                    | 0                   | 0                    |
| <b>seq1753</b> | Firmicutes    | Clostridia       | 0                   | 0                    | 0                   | 0                    |
| <b>seq1141</b> | Firmicutes    | Clostridia       | 0                   | 0                    | 0                   | 0                    |
| <b>seq1572</b> | Firmicutes    | Clostridia       | 0                   | 0                    | 0                   | 0                    |
| <b>seq829</b>  | Firmicutes    | Clostridia       | 0                   | 0                    | 0                   | 0                    |
| <b>seq1734</b> | Firmicutes    | Clostridia       | 0                   | 0                    | 0                   | 0                    |
| <b>seq1819</b> | Firmicutes    | Clostridia       | 0                   | 0                    | 0                   | 0                    |
| <b>seq1268</b> | Firmicutes    | Clostridia       | 0                   | 0                    | 0                   | 0                    |
| <b>seq1404</b> | Firmicutes    | Clostridia       | 0                   | 0                    | 0                   | 0                    |
| <b>seq567</b>  | Firmicutes    | Clostridia       | 0                   | 0                    | 0                   | 0                    |
| <b>seq916</b>  | Firmicutes    | Bacilli          | 18                  | 9                    | 0                   | 6                    |
| <b>seq1801</b> | Firmicutes    | Clostridia       | 0                   | 0                    | 0                   | 0                    |
| <b>seq1896</b> | Firmicutes    | Clostridia       | 0                   | 0                    | 0                   | 0                    |
| <b>seq1244</b> | Firmicutes    | Clostridia       | 0                   | 0                    | 0                   | 0                    |
| <b>seq1643</b> | Firmicutes    | Clostridia       | 0                   | 0                    | 0                   | 0                    |
| <b>seq1782</b> | Firmicutes    | Clostridia       | 0                   | 0                    | 0                   | 0                    |
| <b>seq1051</b> | Firmicutes    | Clostridia       | 0                   | 0                    | 0                   | 0                    |
| <b>seq1534</b> | Firmicutes    | Clostridia       | 0                   | 0                    | 0                   | 0                    |
| <b>seq1535</b> | Firmicutes    | Clostridia       | 0                   | 0                    | 0                   | 0                    |
| <b>seq1751</b> | Firmicutes    | Clostridia       | 0                   | 0                    | 0                   | 0                    |

Sequence Count Table

|                | <b>Phylum</b> | <b>Class</b>     | <b>Δ</b> |  |  |  |
|----------------|---------------|------------------|----------|--|--|--|
| <b>seq485</b>  | Firmicutes    | Erysipelotrichia |          |  |  |  |
| <b>seq305</b>  | Firmicutes    | Erysipelotrichia |          |  |  |  |
| <b>seq554</b>  | Firmicutes    | Erysipelotrichia |          |  |  |  |
| <b>seq709</b>  | Firmicutes    | Erysipelotrichia |          |  |  |  |
| <b>seq996</b>  | Firmicutes    | Erysipelotrichia |          |  |  |  |
| <b>seq1004</b> | Firmicutes    | Erysipelotrichia |          |  |  |  |
| <b>seq1059</b> | Firmicutes    | Erysipelotrichia |          |  |  |  |
| <b>seq1112</b> | Firmicutes    | Erysipelotrichia |          |  |  |  |
| <b>seq1452</b> | Firmicutes    | Erysipelotrichia |          |  |  |  |
| <b>seq1755</b> | Firmicutes    | Erysipelotrichia |          |  |  |  |
| <b>seq1219</b> | Firmicutes    | Clostridia       |          |  |  |  |
| <b>seq1406</b> | Firmicutes    | Clostridia       |          |  |  |  |
| <b>seq1491</b> | Firmicutes    | Clostridia       |          |  |  |  |
| <b>seq1753</b> | Firmicutes    | Clostridia       |          |  |  |  |
| <b>seq1141</b> | Firmicutes    | Clostridia       |          |  |  |  |
| <b>seq1572</b> | Firmicutes    | Clostridia       |          |  |  |  |
| <b>seq829</b>  | Firmicutes    | Clostridia       |          |  |  |  |
| <b>seq1734</b> | Firmicutes    | Clostridia       |          |  |  |  |
| <b>seq1819</b> | Firmicutes    | Clostridia       |          |  |  |  |
| <b>seq1268</b> | Firmicutes    | Clostridia       |          |  |  |  |
| <b>seq1404</b> | Firmicutes    | Clostridia       |          |  |  |  |
| <b>seq567</b>  | Firmicutes    | Clostridia       |          |  |  |  |
| <b>seq916</b>  | Firmicutes    | Bacilli          |          |  |  |  |
| <b>seq1801</b> | Firmicutes    | Clostridia       |          |  |  |  |
| <b>seq1896</b> | Firmicutes    | Clostridia       |          |  |  |  |
| <b>seq1244</b> | Firmicutes    | Clostridia       |          |  |  |  |
| <b>seq1643</b> | Firmicutes    | Clostridia       |          |  |  |  |
| <b>seq1782</b> | Firmicutes    | Clostridia       |          |  |  |  |
| <b>seq1051</b> | Firmicutes    | Clostridia       |          |  |  |  |
| <b>seq1534</b> | Firmicutes    | Clostridia       |          |  |  |  |
| <b>seq1535</b> | Firmicutes    | Clostridia       |          |  |  |  |
| <b>seq1751</b> | Firmicutes    | Clostridia       |          |  |  |  |

Sequence Count Table

|                | <b>Phylum</b> | <b>Class</b> | <b>Order</b>  | <b>Family</b> |
|----------------|---------------|--------------|---------------|---------------|
| <b>seq1892</b> | Firmicutes    | Clostridia   | Clostridiales | Family_XI     |
| <b>seq1476</b> | Firmicutes    | Clostridia   | Clostridiales | Family_XIII   |
| <b>seq278</b>  | Firmicutes    | Clostridia   | Clostridiales | Family_XIII   |
| <b>seq440</b>  | Firmicutes    | Clostridia   | Clostridiales | Family_XIII   |
| <b>seq657</b>  | Firmicutes    | Clostridia   | Clostridiales | Family_XIII   |
| <b>seq670</b>  | Firmicutes    | Clostridia   | Clostridiales | Family_XIII   |
| <b>seq800</b>  | Firmicutes    | Clostridia   | Clostridiales | Family_XIII   |
| <b>seq922</b>  | Firmicutes    | Clostridia   | Clostridiales | Family_XIII   |
| <b>seq940</b>  | Firmicutes    | Clostridia   | Clostridiales | Family_XIII   |
| <b>seq1017</b> | Firmicutes    | Clostridia   | Clostridiales | Family_XIII   |
| <b>seq1214</b> | Firmicutes    | Clostridia   | Clostridiales | Family_XIII   |
| <b>seq1236</b> | Firmicutes    | Clostridia   | Clostridiales | Family_XIII   |
| <b>seq1366</b> | Firmicutes    | Clostridia   | Clostridiales | Family_XIII   |
| <b>seq1427</b> | Firmicutes    | Clostridia   | Clostridiales | Family_XIII   |
| <b>seq1449</b> | Firmicutes    | Clostridia   | Clostridiales | Family_XIII   |
| <b>seq1480</b> | Firmicutes    | Clostridia   | Clostridiales | Family_XIII   |
| <b>seq1487</b> | Firmicutes    | Clostridia   | Clostridiales | Family_XIII   |
| <b>seq1560</b> | Firmicutes    | Clostridia   | Clostridiales | Family_XIII   |
| <b>seq1703</b> | Firmicutes    | Clostridia   | Clostridiales | Family_XIII   |
| <b>seq1766</b> | Firmicutes    | Clostridia   | Clostridiales | Family_XIII   |
| <b>seq1800</b> | Firmicutes    | Clostridia   | Clostridiales | Family_XIII   |
| <b>seq386</b>  | Firmicutes    | Clostridia   | Clostridiales | Family_XIII   |
| <b>seq743</b>  | Firmicutes    | Clostridia   | Clostridiales | Family_XIII   |
| <b>seq1043</b> | Firmicutes    | Clostridia   | Clostridiales | Family_XIII   |
| <b>seq1301</b> | Firmicutes    | Clostridia   | Clostridiales | Family_XIII   |
| <b>seq282</b>  | Firmicutes    | Clostridia   | Clostridiales | Family_XIII   |
| <b>seq1382</b> | Firmicutes    | Clostridia   | Clostridiales | Family_XIII   |
| <b>seq1732</b> | Firmicutes    | Clostridia   | Clostridiales | Family_XIII   |
| <b>seq1779</b> | Firmicutes    | Clostridia   | Clostridiales | Family_XIII   |
| <b>seq1616</b> | Firmicutes    | Clostridia   | Clostridiales | Family_XIII   |
| <b>seq716</b>  | Firmicutes    | Clostridia   | Clostridiales | Family_XIII   |
| <b>seq858</b>  | Firmicutes    | Clostridia   | Clostridiales | Family_XIII   |

Sequence Count Table

|                | <b>Phylum</b> | <b>Class</b> | <b>Genus</b>             | <b>Species</b> |
|----------------|---------------|--------------|--------------------------|----------------|
| <b>seq1892</b> | Firmicutes    | Clostridia   | Peptoniphilus            | duerdenii      |
| <b>seq1476</b> | Firmicutes    | Clostridia   | Anaerovorax              |                |
| <b>seq278</b>  | Firmicutes    | Clostridia   | Family_XIII_AD3011_group |                |
| <b>seq440</b>  | Firmicutes    | Clostridia   | Family_XIII_AD3011_group |                |
| <b>seq657</b>  | Firmicutes    | Clostridia   | Family_XIII_AD3011_group |                |
| <b>seq670</b>  | Firmicutes    | Clostridia   | Family_XIII_AD3011_group |                |
| <b>seq800</b>  | Firmicutes    | Clostridia   | Family_XIII_AD3011_group |                |
| <b>seq922</b>  | Firmicutes    | Clostridia   | Family_XIII_AD3011_group |                |
| <b>seq940</b>  | Firmicutes    | Clostridia   | Family_XIII_AD3011_group |                |
| <b>seq1017</b> | Firmicutes    | Clostridia   | Family_XIII_AD3011_group |                |
| <b>seq1214</b> | Firmicutes    | Clostridia   | Family_XIII_AD3011_group |                |
| <b>seq1236</b> | Firmicutes    | Clostridia   | Family_XIII_AD3011_group |                |
| <b>seq1366</b> | Firmicutes    | Clostridia   | Family_XIII_AD3011_group |                |
| <b>seq1427</b> | Firmicutes    | Clostridia   | Family_XIII_AD3011_group |                |
| <b>seq1449</b> | Firmicutes    | Clostridia   | Family_XIII_AD3011_group |                |
| <b>seq1480</b> | Firmicutes    | Clostridia   | Family_XIII_AD3011_group |                |
| <b>seq1487</b> | Firmicutes    | Clostridia   | Family_XIII_AD3011_group |                |
| <b>seq1560</b> | Firmicutes    | Clostridia   | Family_XIII_AD3011_group |                |
| <b>seq1703</b> | Firmicutes    | Clostridia   | Family_XIII_AD3011_group |                |
| <b>seq1766</b> | Firmicutes    | Clostridia   | Family_XIII_AD3011_group |                |
| <b>seq1800</b> | Firmicutes    | Clostridia   | Family_XIII_AD3011_group |                |
| <b>seq386</b>  | Firmicutes    | Clostridia   | Family_XIII_UCG-001      |                |
| <b>seq743</b>  | Firmicutes    | Clostridia   | Family_XIII_UCG-001      |                |
| <b>seq1043</b> | Firmicutes    | Clostridia   | Family_XIII_UCG-001      |                |
| <b>seq1301</b> | Firmicutes    | Clostridia   | Family_XIII_UCG-001      |                |
| <b>seq282</b>  | Firmicutes    | Clostridia   | Mogibacterium            |                |
| <b>seq1382</b> | Firmicutes    | Clostridia   | Mogibacterium            |                |
| <b>seq1732</b> | Firmicutes    | Clostridia   | Mogibacterium            |                |
| <b>seq1779</b> | Firmicutes    | Clostridia   | Mogibacterium            |                |
| <b>seq1616</b> | Firmicutes    | Clostridia   | S5-A14a                  |                |
| <b>seq716</b>  | Firmicutes    | Clostridia   |                          |                |
| <b>seq858</b>  | Firmicutes    | Clostridia   |                          |                |



Sequence Count Table

|                | <b>Phylum</b> | <b>Class</b> | <b>Subject34WK0</b> | <b>Subject34WK12</b> | <b>Subject16WK0</b> | <b>Subject16WK12</b> |
|----------------|---------------|--------------|---------------------|----------------------|---------------------|----------------------|
| <b>seq1892</b> | Firmicutes    | Clostridia   | 0                   | 0                    | 0                   | 0                    |
| <b>seq1476</b> | Firmicutes    | Clostridia   | 0                   | 0                    | 0                   | 0                    |
| <b>seq278</b>  | Firmicutes    | Clostridia   | 8                   | 49                   | 26                  | 29                   |
| <b>seq440</b>  | Firmicutes    | Clostridia   | 0                   | 0                    | 0                   | 18                   |
| <b>seq657</b>  | Firmicutes    | Clostridia   | 0                   | 33                   | 0                   | 0                    |
| <b>seq670</b>  | Firmicutes    | Clostridia   | 0                   | 0                    | 0                   | 0                    |
| <b>seq800</b>  | Firmicutes    | Clostridia   | 0                   | 0                    | 0                   | 0                    |
| <b>seq922</b>  | Firmicutes    | Clostridia   | 0                   | 0                    | 0                   | 25                   |
| <b>seq940</b>  | Firmicutes    | Clostridia   | 0                   | 0                    | 0                   | 0                    |
| <b>seq1017</b> | Firmicutes    | Clostridia   | 0                   | 0                    | 0                   | 0                    |
| <b>seq1214</b> | Firmicutes    | Clostridia   | 0                   | 0                    | 0                   | 0                    |
| <b>seq1236</b> | Firmicutes    | Clostridia   | 0                   | 0                    | 0                   | 0                    |
| <b>seq1366</b> | Firmicutes    | Clostridia   | 0                   | 0                    | 0                   | 0                    |
| <b>seq1427</b> | Firmicutes    | Clostridia   | 0                   | 0                    | 0                   | 0                    |
| <b>seq1449</b> | Firmicutes    | Clostridia   | 0                   | 0                    | 0                   | 0                    |
| <b>seq1480</b> | Firmicutes    | Clostridia   | 0                   | 0                    | 0                   | 0                    |
| <b>seq1487</b> | Firmicutes    | Clostridia   | 0                   | 0                    | 0                   | 0                    |
| <b>seq1560</b> | Firmicutes    | Clostridia   | 0                   | 0                    | 0                   | 0                    |
| <b>seq1703</b> | Firmicutes    | Clostridia   | 0                   | 0                    | 0                   | 0                    |
| <b>seq1766</b> | Firmicutes    | Clostridia   | 0                   | 0                    | 0                   | 0                    |
| <b>seq1800</b> | Firmicutes    | Clostridia   | 0                   | 0                    | 0                   | 0                    |
| <b>seq386</b>  | Firmicutes    | Clostridia   | 0                   | 0                    | 47                  | 49                   |
| <b>seq743</b>  | Firmicutes    | Clostridia   | 0                   | 0                    | 0                   | 0                    |
| <b>seq1043</b> | Firmicutes    | Clostridia   | 0                   | 0                    | 0                   | 0                    |
| <b>seq1301</b> | Firmicutes    | Clostridia   | 0                   | 0                    | 0                   | 0                    |
| <b>seq282</b>  | Firmicutes    | Clostridia   | 0                   | 0                    | 0                   | 0                    |
| <b>seq1382</b> | Firmicutes    | Clostridia   | 0                   | 20                   | 0                   | 0                    |
| <b>seq1732</b> | Firmicutes    | Clostridia   | 0                   | 0                    | 0                   | 0                    |
| <b>seq1779</b> | Firmicutes    | Clostridia   | 0                   | 0                    | 0                   | 0                    |
| <b>seq1616</b> | Firmicutes    | Clostridia   | 0                   | 0                    | 0                   | 0                    |
| <b>seq716</b>  | Firmicutes    | Clostridia   | 0                   | 0                    | 0                   | 0                    |
| <b>seq858</b>  | Firmicutes    | Clostridia   | 0                   | 0                    | 0                   | 0                    |

Sequence Count Table

|                | <b>Phylum</b> | <b>Class</b> | <b>Subject17WK0</b> | <b>Subject17WK12</b> | <b>Subject1WK0</b> | <b>Subject1WK12</b> |
|----------------|---------------|--------------|---------------------|----------------------|--------------------|---------------------|
| <b>seq1892</b> | Firmicutes    | Clostridia   | 0                   | 0                    | 0                  | 0                   |
| <b>seq1476</b> | Firmicutes    | Clostridia   | 0                   | 0                    | 0                  | 0                   |
| <b>seq278</b>  | Firmicutes    | Clostridia   | 228                 | 108                  | 29                 | 21                  |
| <b>seq440</b>  | Firmicutes    | Clostridia   | 19                  | 20                   | 0                  | 0                   |
| <b>seq657</b>  | Firmicutes    | Clostridia   | 45                  | 72                   | 0                  | 0                   |
| <b>seq670</b>  | Firmicutes    | Clostridia   | 35                  | 26                   | 0                  | 0                   |
| <b>seq800</b>  | Firmicutes    | Clostridia   | 0                   | 0                    | 0                  | 0                   |
| <b>seq922</b>  | Firmicutes    | Clostridia   | 0                   | 0                    | 0                  | 0                   |
| <b>seq940</b>  | Firmicutes    | Clostridia   | 0                   | 0                    | 0                  | 0                   |
| <b>seq1017</b> | Firmicutes    | Clostridia   | 0                   | 0                    | 0                  | 0                   |
| <b>seq1214</b> | Firmicutes    | Clostridia   | 0                   | 0                    | 0                  | 0                   |
| <b>seq1236</b> | Firmicutes    | Clostridia   | 0                   | 0                    | 0                  | 0                   |
| <b>seq1366</b> | Firmicutes    | Clostridia   | 0                   | 0                    | 0                  | 0                   |
| <b>seq1427</b> | Firmicutes    | Clostridia   | 0                   | 0                    | 0                  | 0                   |
| <b>seq1449</b> | Firmicutes    | Clostridia   | 0                   | 0                    | 0                  | 0                   |
| <b>seq1480</b> | Firmicutes    | Clostridia   | 0                   | 0                    | 0                  | 0                   |
| <b>seq1487</b> | Firmicutes    | Clostridia   | 0                   | 0                    | 0                  | 0                   |
| <b>seq1560</b> | Firmicutes    | Clostridia   | 0                   | 0                    | 0                  | 0                   |
| <b>seq1703</b> | Firmicutes    | Clostridia   | 0                   | 0                    | 0                  | 0                   |
| <b>seq1766</b> | Firmicutes    | Clostridia   | 0                   | 0                    | 0                  | 0                   |
| <b>seq1800</b> | Firmicutes    | Clostridia   | 0                   | 0                    | 0                  | 0                   |
| <b>seq386</b>  | Firmicutes    | Clostridia   | 45                  | 61                   | 88                 | 101                 |
| <b>seq743</b>  | Firmicutes    | Clostridia   | 0                   | 0                    | 0                  | 0                   |
| <b>seq1043</b> | Firmicutes    | Clostridia   | 0                   | 0                    | 0                  | 0                   |
| <b>seq1301</b> | Firmicutes    | Clostridia   | 0                   | 0                    | 0                  | 0                   |
| <b>seq282</b>  | Firmicutes    | Clostridia   | 439                 | 226                  | 0                  | 0                   |
| <b>seq1382</b> | Firmicutes    | Clostridia   | 0                   | 0                    | 0                  | 0                   |
| <b>seq1732</b> | Firmicutes    | Clostridia   | 0                   | 0                    | 0                  | 0                   |
| <b>seq1779</b> | Firmicutes    | Clostridia   | 0                   | 0                    | 0                  | 0                   |
| <b>seq1616</b> | Firmicutes    | Clostridia   | 0                   | 0                    | 0                  | 0                   |
| <b>seq716</b>  | Firmicutes    | Clostridia   | 0                   | 0                    | 0                  | 0                   |
| <b>seq858</b>  | Firmicutes    | Clostridia   | 0                   | 0                    | 0                  | 0                   |

Sequence Count Table

|                | <b>Phylum</b> | <b>Class</b> | <b>Subject2WK0</b> | <b>Subject2WK12</b> | <b>Subject3WK0</b> | <b>Subject3WK12</b> |
|----------------|---------------|--------------|--------------------|---------------------|--------------------|---------------------|
| <b>seq1892</b> | Firmicutes    | Clostridia   | 0                  | 0                   | 0                  | 0                   |
| <b>seq1476</b> | Firmicutes    | Clostridia   | 0                  | 0                   | 0                  | 0                   |
| <b>seq278</b>  | Firmicutes    | Clostridia   | 58                 | 57                  | 0                  | 0                   |
| <b>seq440</b>  | Firmicutes    | Clostridia   | 144                | 127                 | 0                  | 0                   |
| <b>seq657</b>  | Firmicutes    | Clostridia   | 0                  | 0                   | 0                  | 0                   |
| <b>seq670</b>  | Firmicutes    | Clostridia   | 0                  | 0                   | 0                  | 0                   |
| <b>seq800</b>  | Firmicutes    | Clostridia   | 0                  | 0                   | 0                  | 0                   |
| <b>seq922</b>  | Firmicutes    | Clostridia   | 0                  | 0                   | 0                  | 0                   |
| <b>seq940</b>  | Firmicutes    | Clostridia   | 0                  | 0                   | 0                  | 0                   |
| <b>seq1017</b> | Firmicutes    | Clostridia   | 0                  | 0                   | 0                  | 0                   |
| <b>seq1214</b> | Firmicutes    | Clostridia   | 0                  | 0                   | 0                  | 0                   |
| <b>seq1236</b> | Firmicutes    | Clostridia   | 0                  | 0                   | 0                  | 0                   |
| <b>seq1366</b> | Firmicutes    | Clostridia   | 0                  | 0                   | 0                  | 0                   |
| <b>seq1427</b> | Firmicutes    | Clostridia   | 0                  | 0                   | 0                  | 0                   |
| <b>seq1449</b> | Firmicutes    | Clostridia   | 0                  | 0                   | 0                  | 0                   |
| <b>seq1480</b> | Firmicutes    | Clostridia   | 0                  | 0                   | 0                  | 0                   |
| <b>seq1487</b> | Firmicutes    | Clostridia   | 0                  | 0                   | 0                  | 0                   |
| <b>seq1560</b> | Firmicutes    | Clostridia   | 0                  | 0                   | 0                  | 0                   |
| <b>seq1703</b> | Firmicutes    | Clostridia   | 0                  | 0                   | 0                  | 0                   |
| <b>seq1766</b> | Firmicutes    | Clostridia   | 0                  | 0                   | 0                  | 0                   |
| <b>seq1800</b> | Firmicutes    | Clostridia   | 0                  | 0                   | 0                  | 0                   |
| <b>seq386</b>  | Firmicutes    | Clostridia   | 0                  | 0                   | 0                  | 0                   |
| <b>seq743</b>  | Firmicutes    | Clostridia   | 0                  | 0                   | 0                  | 0                   |
| <b>seq1043</b> | Firmicutes    | Clostridia   | 0                  | 0                   | 0                  | 0                   |
| <b>seq1301</b> | Firmicutes    | Clostridia   | 0                  | 0                   | 0                  | 0                   |
| <b>seq282</b>  | Firmicutes    | Clostridia   | 0                  | 0                   | 0                  | 0                   |
| <b>seq1382</b> | Firmicutes    | Clostridia   | 0                  | 0                   | 0                  | 0                   |
| <b>seq1732</b> | Firmicutes    | Clostridia   | 0                  | 0                   | 0                  | 0                   |
| <b>seq1779</b> | Firmicutes    | Clostridia   | 0                  | 0                   | 0                  | 0                   |
| <b>seq1616</b> | Firmicutes    | Clostridia   | 0                  | 0                   | 0                  | 0                   |
| <b>seq716</b>  | Firmicutes    | Clostridia   | 0                  | 0                   | 353                | 0                   |
| <b>seq858</b>  | Firmicutes    | Clostridia   | 11                 | 27                  | 0                  | 0                   |

Sequence Count Table

|                | <b>Phylum</b> | <b>Class</b> | <b>Subject4WK0</b> | <b>Subject4WK12</b> | <b>Subject5WK0</b> | <b>Subject5WK12</b> |
|----------------|---------------|--------------|--------------------|---------------------|--------------------|---------------------|
| <b>seq1892</b> | Firmicutes    | Clostridia   | 0                  | 0                   | 0                  | 0                   |
| <b>seq1476</b> | Firmicutes    | Clostridia   | 0                  | 0                   | 0                  | 0                   |
| <b>seq278</b>  | Firmicutes    | Clostridia   | 153                | 35                  | 46                 | 117                 |
| <b>seq440</b>  | Firmicutes    | Clostridia   | 0                  | 0                   | 0                  | 0                   |
| <b>seq657</b>  | Firmicutes    | Clostridia   | 0                  | 0                   | 0                  | 0                   |
| <b>seq670</b>  | Firmicutes    | Clostridia   | 35                 | 0                   | 0                  | 0                   |
| <b>seq800</b>  | Firmicutes    | Clostridia   | 47                 | 23                  | 0                  | 0                   |
| <b>seq922</b>  | Firmicutes    | Clostridia   | 0                  | 0                   | 0                  | 0                   |
| <b>seq940</b>  | Firmicutes    | Clostridia   | 0                  | 0                   | 0                  | 0                   |
| <b>seq1017</b> | Firmicutes    | Clostridia   | 0                  | 0                   | 0                  | 0                   |
| <b>seq1214</b> | Firmicutes    | Clostridia   | 0                  | 0                   | 0                  | 0                   |
| <b>seq1236</b> | Firmicutes    | Clostridia   | 0                  | 0                   | 0                  | 0                   |
| <b>seq1366</b> | Firmicutes    | Clostridia   | 0                  | 0                   | 0                  | 0                   |
| <b>seq1427</b> | Firmicutes    | Clostridia   | 0                  | 0                   | 0                  | 0                   |
| <b>seq1449</b> | Firmicutes    | Clostridia   | 0                  | 0                   | 0                  | 0                   |
| <b>seq1480</b> | Firmicutes    | Clostridia   | 0                  | 0                   | 0                  | 0                   |
| <b>seq1487</b> | Firmicutes    | Clostridia   | 0                  | 0                   | 0                  | 0                   |
| <b>seq1560</b> | Firmicutes    | Clostridia   | 0                  | 0                   | 0                  | 0                   |
| <b>seq1703</b> | Firmicutes    | Clostridia   | 0                  | 0                   | 0                  | 0                   |
| <b>seq1766</b> | Firmicutes    | Clostridia   | 0                  | 9                   | 0                  | 0                   |
| <b>seq1800</b> | Firmicutes    | Clostridia   | 0                  | 0                   | 0                  | 0                   |
| <b>seq386</b>  | Firmicutes    | Clostridia   | 0                  | 0                   | 33                 | 50                  |
| <b>seq743</b>  | Firmicutes    | Clostridia   | 0                  | 0                   | 0                  | 0                   |
| <b>seq1043</b> | Firmicutes    | Clostridia   | 56                 | 51                  | 0                  | 0                   |
| <b>seq1301</b> | Firmicutes    | Clostridia   | 0                  | 0                   | 0                  | 0                   |
| <b>seq282</b>  | Firmicutes    | Clostridia   | 0                  | 0                   | 0                  | 0                   |
| <b>seq1382</b> | Firmicutes    | Clostridia   | 0                  | 0                   | 0                  | 0                   |
| <b>seq1732</b> | Firmicutes    | Clostridia   | 0                  | 0                   | 0                  | 0                   |
| <b>seq1779</b> | Firmicutes    | Clostridia   | 0                  | 0                   | 0                  | 0                   |
| <b>seq1616</b> | Firmicutes    | Clostridia   | 0                  | 0                   | 0                  | 10                  |
| <b>seq716</b>  | Firmicutes    | Clostridia   | 0                  | 0                   | 0                  | 0                   |
| <b>seq858</b>  | Firmicutes    | Clostridia   | 0                  | 0                   | 19                 | 30                  |

Sequence Count Table

|                | <b>Phylum</b> | <b>Class</b> | <b>Subject6WK0</b> | <b>Subject6WK12</b> | <b>Subject18WK0</b> | <b>Subject18WK12</b> |
|----------------|---------------|--------------|--------------------|---------------------|---------------------|----------------------|
| <b>seq1892</b> | Firmicutes    | Clostridia   | 0                  | 0                   | 0                   | 0                    |
| <b>seq1476</b> | Firmicutes    | Clostridia   | 0                  | 0                   | 0                   | 0                    |
| <b>seq278</b>  | Firmicutes    | Clostridia   | 54                 | 105                 | 0                   | 0                    |
| <b>seq440</b>  | Firmicutes    | Clostridia   | 0                  | 33                  | 0                   | 0                    |
| <b>seq657</b>  | Firmicutes    | Clostridia   | 0                  | 37                  | 0                   | 0                    |
| <b>seq670</b>  | Firmicutes    | Clostridia   | 33                 | 29                  | 0                   | 0                    |
| <b>seq800</b>  | Firmicutes    | Clostridia   | 0                  | 0                   | 0                   | 0                    |
| <b>seq922</b>  | Firmicutes    | Clostridia   | 51                 | 0                   | 0                   | 0                    |
| <b>seq940</b>  | Firmicutes    | Clostridia   | 0                  | 0                   | 0                   | 0                    |
| <b>seq1017</b> | Firmicutes    | Clostridia   | 0                  | 0                   | 0                   | 0                    |
| <b>seq1214</b> | Firmicutes    | Clostridia   | 0                  | 0                   | 0                   | 0                    |
| <b>seq1236</b> | Firmicutes    | Clostridia   | 0                  | 0                   | 0                   | 0                    |
| <b>seq1366</b> | Firmicutes    | Clostridia   | 0                  | 0                   | 0                   | 0                    |
| <b>seq1427</b> | Firmicutes    | Clostridia   | 0                  | 0                   | 0                   | 0                    |
| <b>seq1449</b> | Firmicutes    | Clostridia   | 0                  | 0                   | 0                   | 0                    |
| <b>seq1480</b> | Firmicutes    | Clostridia   | 0                  | 0                   | 0                   | 0                    |
| <b>seq1487</b> | Firmicutes    | Clostridia   | 0                  | 0                   | 0                   | 0                    |
| <b>seq1560</b> | Firmicutes    | Clostridia   | 0                  | 0                   | 0                   | 0                    |
| <b>seq1703</b> | Firmicutes    | Clostridia   | 0                  | 0                   | 0                   | 0                    |
| <b>seq1766</b> | Firmicutes    | Clostridia   | 0                  | 0                   | 0                   | 0                    |
| <b>seq1800</b> | Firmicutes    | Clostridia   | 0                  | 0                   | 0                   | 0                    |
| <b>seq386</b>  | Firmicutes    | Clostridia   | 66                 | 92                  | 0                   | 0                    |
| <b>seq743</b>  | Firmicutes    | Clostridia   | 0                  | 0                   | 0                   | 0                    |
| <b>seq1043</b> | Firmicutes    | Clostridia   | 0                  | 0                   | 0                   | 0                    |
| <b>seq1301</b> | Firmicutes    | Clostridia   | 0                  | 0                   | 0                   | 0                    |
| <b>seq282</b>  | Firmicutes    | Clostridia   | 341                | 297                 | 0                   | 0                    |
| <b>seq1382</b> | Firmicutes    | Clostridia   | 0                  | 0                   | 0                   | 0                    |
| <b>seq1732</b> | Firmicutes    | Clostridia   | 0                  | 0                   | 0                   | 0                    |
| <b>seq1779</b> | Firmicutes    | Clostridia   | 0                  | 0                   | 0                   | 0                    |
| <b>seq1616</b> | Firmicutes    | Clostridia   | 0                  | 0                   | 0                   | 0                    |
| <b>seq716</b>  | Firmicutes    | Clostridia   | 0                  | 0                   | 0                   | 0                    |
| <b>seq858</b>  | Firmicutes    | Clostridia   | 0                  | 0                   | 0                   | 0                    |

Sequence Count Table

|                | <b>Phylum</b> | <b>Class</b> | <b>Subject19WK0</b> | <b>Subject19WK12</b> | <b>Subject20WK0</b> | <b>Subject20WK12</b> |
|----------------|---------------|--------------|---------------------|----------------------|---------------------|----------------------|
| <b>seq1892</b> | Firmicutes    | Clostridia   | 0                   | 0                    | 0                   | 0                    |
| <b>seq1476</b> | Firmicutes    | Clostridia   | 0                   | 0                    | 0                   | 0                    |
| <b>seq278</b>  | Firmicutes    | Clostridia   | 40                  | 50                   | 55                  | 69                   |
| <b>seq440</b>  | Firmicutes    | Clostridia   | 0                   | 0                    | 51                  | 163                  |
| <b>seq657</b>  | Firmicutes    | Clostridia   | 0                   | 0                    | 0                   | 0                    |
| <b>seq670</b>  | Firmicutes    | Clostridia   | 0                   | 0                    | 0                   | 0                    |
| <b>seq800</b>  | Firmicutes    | Clostridia   | 0                   | 0                    | 0                   | 0                    |
| <b>seq922</b>  | Firmicutes    | Clostridia   | 0                   | 0                    | 27                  | 67                   |
| <b>seq940</b>  | Firmicutes    | Clostridia   | 0                   | 99                   | 0                   | 0                    |
| <b>seq1017</b> | Firmicutes    | Clostridia   | 0                   | 0                    | 0                   | 0                    |
| <b>seq1214</b> | Firmicutes    | Clostridia   | 0                   | 0                    | 0                   | 52                   |
| <b>seq1236</b> | Firmicutes    | Clostridia   | 0                   | 0                    | 0                   | 0                    |
| <b>seq1366</b> | Firmicutes    | Clostridia   | 0                   | 0                    | 0                   | 46                   |
| <b>seq1427</b> | Firmicutes    | Clostridia   | 0                   | 0                    | 38                  | 0                    |
| <b>seq1449</b> | Firmicutes    | Clostridia   | 0                   | 0                    | 0                   | 0                    |
| <b>seq1480</b> | Firmicutes    | Clostridia   | 0                   | 0                    | 0                   | 0                    |
| <b>seq1487</b> | Firmicutes    | Clostridia   | 0                   | 0                    | 0                   | 0                    |
| <b>seq1560</b> | Firmicutes    | Clostridia   | 0                   | 0                    | 0                   | 0                    |
| <b>seq1703</b> | Firmicutes    | Clostridia   | 0                   | 0                    | 0                   | 0                    |
| <b>seq1766</b> | Firmicutes    | Clostridia   | 0                   | 0                    | 0                   | 0                    |
| <b>seq1800</b> | Firmicutes    | Clostridia   | 0                   | 0                    | 0                   | 0                    |
| <b>seq386</b>  | Firmicutes    | Clostridia   | 0                   | 0                    | 0                   | 0                    |
| <b>seq743</b>  | Firmicutes    | Clostridia   | 0                   | 0                    | 44                  | 69                   |
| <b>seq1043</b> | Firmicutes    | Clostridia   | 14                  | 0                    | 0                   | 0                    |
| <b>seq1301</b> | Firmicutes    | Clostridia   | 0                   | 0                    | 0                   | 0                    |
| <b>seq282</b>  | Firmicutes    | Clostridia   | 0                   | 0                    | 113                 | 392                  |
| <b>seq1382</b> | Firmicutes    | Clostridia   | 0                   | 0                    | 0                   | 14                   |
| <b>seq1732</b> | Firmicutes    | Clostridia   | 0                   | 0                    | 0                   | 0                    |
| <b>seq1779</b> | Firmicutes    | Clostridia   | 0                   | 0                    | 0                   | 0                    |
| <b>seq1616</b> | Firmicutes    | Clostridia   | 0                   | 0                    | 0                   | 0                    |
| <b>seq716</b>  | Firmicutes    | Clostridia   | 0                   | 0                    | 0                   | 0                    |
| <b>seq858</b>  | Firmicutes    | Clostridia   | 0                   | 0                    | 0                   | 0                    |

Sequence Count Table

|                | <b>Phylum</b> | <b>Class</b> | <b>Subject7WK0</b> | <b>Subject7WK12</b> | <b>Subject21WK0</b> | <b>Subject21WK12</b> |
|----------------|---------------|--------------|--------------------|---------------------|---------------------|----------------------|
| <b>seq1892</b> | Firmicutes    | Clostridia   | 0                  | 0                   | 0                   | 0                    |
| <b>seq1476</b> | Firmicutes    | Clostridia   | 0                  | 0                   | 0                   | 0                    |
| <b>seq278</b>  | Firmicutes    | Clostridia   | 81                 | 0                   | 35                  | 60                   |
| <b>seq440</b>  | Firmicutes    | Clostridia   | 16                 | 13                  | 0                   | 0                    |
| <b>seq657</b>  | Firmicutes    | Clostridia   | 0                  | 0                   | 0                   | 0                    |
| <b>seq670</b>  | Firmicutes    | Clostridia   | 0                  | 0                   | 0                   | 0                    |
| <b>seq800</b>  | Firmicutes    | Clostridia   | 93                 | 53                  | 0                   | 0                    |
| <b>seq922</b>  | Firmicutes    | Clostridia   | 0                  | 0                   | 0                   | 0                    |
| <b>seq940</b>  | Firmicutes    | Clostridia   | 0                  | 0                   | 0                   | 0                    |
| <b>seq1017</b> | Firmicutes    | Clostridia   | 103                | 34                  | 0                   | 0                    |
| <b>seq1214</b> | Firmicutes    | Clostridia   | 0                  | 0                   | 0                   | 0                    |
| <b>seq1236</b> | Firmicutes    | Clostridia   | 0                  | 0                   | 0                   | 0                    |
| <b>seq1366</b> | Firmicutes    | Clostridia   | 0                  | 0                   | 0                   | 0                    |
| <b>seq1427</b> | Firmicutes    | Clostridia   | 0                  | 0                   | 0                   | 0                    |
| <b>seq1449</b> | Firmicutes    | Clostridia   | 34                 | 0                   | 0                   | 0                    |
| <b>seq1480</b> | Firmicutes    | Clostridia   | 0                  | 0                   | 0                   | 0                    |
| <b>seq1487</b> | Firmicutes    | Clostridia   | 0                  | 0                   | 0                   | 0                    |
| <b>seq1560</b> | Firmicutes    | Clostridia   | 0                  | 0                   | 0                   | 0                    |
| <b>seq1703</b> | Firmicutes    | Clostridia   | 0                  | 0                   | 0                   | 0                    |
| <b>seq1766</b> | Firmicutes    | Clostridia   | 0                  | 0                   | 0                   | 0                    |
| <b>seq1800</b> | Firmicutes    | Clostridia   | 0                  | 0                   | 0                   | 0                    |
| <b>seq386</b>  | Firmicutes    | Clostridia   | 48                 | 58                  | 0                   | 0                    |
| <b>seq743</b>  | Firmicutes    | Clostridia   | 0                  | 0                   | 0                   | 0                    |
| <b>seq1043</b> | Firmicutes    | Clostridia   | 0                  | 0                   | 0                   | 0                    |
| <b>seq1301</b> | Firmicutes    | Clostridia   | 0                  | 0                   | 0                   | 0                    |
| <b>seq282</b>  | Firmicutes    | Clostridia   | 0                  | 0                   | 0                   | 0                    |
| <b>seq1382</b> | Firmicutes    | Clostridia   | 0                  | 0                   | 0                   | 0                    |
| <b>seq1732</b> | Firmicutes    | Clostridia   | 0                  | 0                   | 0                   | 0                    |
| <b>seq1779</b> | Firmicutes    | Clostridia   | 0                  | 0                   | 0                   | 0                    |
| <b>seq1616</b> | Firmicutes    | Clostridia   | 0                  | 0                   | 0                   | 0                    |
| <b>seq716</b>  | Firmicutes    | Clostridia   | 0                  | 0                   | 0                   | 0                    |
| <b>seq858</b>  | Firmicutes    | Clostridia   | 0                  | 0                   | 0                   | 24                   |

Sequence Count Table

|                | <b>Phylum</b> | <b>Class</b> | <b>Subject8WK0</b> | <b>Subject8WK12</b> | <b>Subject9WK0</b> | <b>Subject9WK12</b> |
|----------------|---------------|--------------|--------------------|---------------------|--------------------|---------------------|
| <b>seq1892</b> | Firmicutes    | Clostridia   | 0                  | 0                   | 0                  | 0                   |
| <b>seq1476</b> | Firmicutes    | Clostridia   | 0                  | 0                   | 0                  | 0                   |
| <b>seq278</b>  | Firmicutes    | Clostridia   | 59                 | 66                  | 28                 | 0                   |
| <b>seq440</b>  | Firmicutes    | Clostridia   | 35                 | 26                  | 0                  | 0                   |
| <b>seq657</b>  | Firmicutes    | Clostridia   | 0                  | 0                   | 0                  | 0                   |
| <b>seq670</b>  | Firmicutes    | Clostridia   | 0                  | 0                   | 0                  | 0                   |
| <b>seq800</b>  | Firmicutes    | Clostridia   | 0                  | 0                   | 0                  | 0                   |
| <b>seq922</b>  | Firmicutes    | Clostridia   | 0                  | 0                   | 0                  | 0                   |
| <b>seq940</b>  | Firmicutes    | Clostridia   | 0                  | 0                   | 0                  | 0                   |
| <b>seq1017</b> | Firmicutes    | Clostridia   | 0                  | 0                   | 0                  | 0                   |
| <b>seq1214</b> | Firmicutes    | Clostridia   | 0                  | 0                   | 0                  | 0                   |
| <b>seq1236</b> | Firmicutes    | Clostridia   | 0                  | 0                   | 0                  | 0                   |
| <b>seq1366</b> | Firmicutes    | Clostridia   | 0                  | 0                   | 0                  | 0                   |
| <b>seq1427</b> | Firmicutes    | Clostridia   | 0                  | 0                   | 0                  | 0                   |
| <b>seq1449</b> | Firmicutes    | Clostridia   | 0                  | 0                   | 0                  | 0                   |
| <b>seq1480</b> | Firmicutes    | Clostridia   | 0                  | 0                   | 0                  | 0                   |
| <b>seq1487</b> | Firmicutes    | Clostridia   | 0                  | 0                   | 0                  | 0                   |
| <b>seq1560</b> | Firmicutes    | Clostridia   | 0                  | 0                   | 0                  | 0                   |
| <b>seq1703</b> | Firmicutes    | Clostridia   | 0                  | 0                   | 0                  | 0                   |
| <b>seq1766</b> | Firmicutes    | Clostridia   | 0                  | 0                   | 0                  | 0                   |
| <b>seq1800</b> | Firmicutes    | Clostridia   | 0                  | 0                   | 0                  | 0                   |
| <b>seq386</b>  | Firmicutes    | Clostridia   | 77                 | 61                  | 0                  | 0                   |
| <b>seq743</b>  | Firmicutes    | Clostridia   | 0                  | 0                   | 0                  | 0                   |
| <b>seq1043</b> | Firmicutes    | Clostridia   | 0                  | 0                   | 6                  | 0                   |
| <b>seq1301</b> | Firmicutes    | Clostridia   | 0                  | 0                   | 0                  | 0                   |
| <b>seq282</b>  | Firmicutes    | Clostridia   | 226                | 181                 | 0                  | 0                   |
| <b>seq1382</b> | Firmicutes    | Clostridia   | 0                  | 0                   | 0                  | 0                   |
| <b>seq1732</b> | Firmicutes    | Clostridia   | 0                  | 0                   | 0                  | 0                   |
| <b>seq1779</b> | Firmicutes    | Clostridia   | 0                  | 0                   | 0                  | 0                   |
| <b>seq1616</b> | Firmicutes    | Clostridia   | 0                  | 0                   | 0                  | 0                   |
| <b>seq716</b>  | Firmicutes    | Clostridia   | 0                  | 0                   | 0                  | 0                   |
| <b>seq858</b>  | Firmicutes    | Clostridia   | 14                 | 26                  | 0                  | 0                   |



Sequence Count Table

|                | <b>Phylum</b> | <b>Class</b> | <b>Subject10WK0</b> | <b>Subject10WK12</b> | <b>Subject22WK0</b> | <b>Subject22WK12</b> |
|----------------|---------------|--------------|---------------------|----------------------|---------------------|----------------------|
| <b>seq1892</b> | Firmicutes    | Clostridia   | 0                   | 0                    | 0                   | 0                    |
| <b>seq1476</b> | Firmicutes    | Clostridia   | 0                   | 0                    | 19                  | 12                   |
| <b>seq278</b>  | Firmicutes    | Clostridia   | 0                   | 0                    | 80                  | 37                   |
| <b>seq440</b>  | Firmicutes    | Clostridia   | 0                   | 0                    | 58                  | 36                   |
| <b>seq657</b>  | Firmicutes    | Clostridia   | 0                   | 0                    | 0                   | 0                    |
| <b>seq670</b>  | Firmicutes    | Clostridia   | 0                   | 0                    | 78                  | 37                   |
| <b>seq800</b>  | Firmicutes    | Clostridia   | 27                  | 0                    | 0                   | 0                    |
| <b>seq922</b>  | Firmicutes    | Clostridia   | 0                   | 0                    | 0                   | 0                    |
| <b>seq940</b>  | Firmicutes    | Clostridia   | 0                   | 0                    | 0                   | 0                    |
| <b>seq1017</b> | Firmicutes    | Clostridia   | 0                   | 0                    | 0                   | 0                    |
| <b>seq1214</b> | Firmicutes    | Clostridia   | 0                   | 0                    | 0                   | 0                    |
| <b>seq1236</b> | Firmicutes    | Clostridia   | 0                   | 0                    | 15                  | 20                   |
| <b>seq1366</b> | Firmicutes    | Clostridia   | 0                   | 0                    | 0                   | 0                    |
| <b>seq1427</b> | Firmicutes    | Clostridia   | 0                   | 0                    | 0                   | 0                    |
| <b>seq1449</b> | Firmicutes    | Clostridia   | 0                   | 0                    | 0                   | 0                    |
| <b>seq1480</b> | Firmicutes    | Clostridia   | 0                   | 0                    | 0                   | 0                    |
| <b>seq1487</b> | Firmicutes    | Clostridia   | 17                  | 13                   | 0                   | 0                    |
| <b>seq1560</b> | Firmicutes    | Clostridia   | 0                   | 0                    | 0                   | 0                    |
| <b>seq1703</b> | Firmicutes    | Clostridia   | 0                   | 0                    | 0                   | 0                    |
| <b>seq1766</b> | Firmicutes    | Clostridia   | 0                   | 0                    | 0                   | 0                    |
| <b>seq1800</b> | Firmicutes    | Clostridia   | 0                   | 0                    | 0                   | 0                    |
| <b>seq386</b>  | Firmicutes    | Clostridia   | 62                  | 45                   | 62                  | 55                   |
| <b>seq743</b>  | Firmicutes    | Clostridia   | 0                   | 0                    | 0                   | 0                    |
| <b>seq1043</b> | Firmicutes    | Clostridia   | 0                   | 0                    | 0                   | 0                    |
| <b>seq1301</b> | Firmicutes    | Clostridia   | 0                   | 0                    | 0                   | 0                    |
| <b>seq282</b>  | Firmicutes    | Clostridia   | 0                   | 0                    | 227                 | 74                   |
| <b>seq1382</b> | Firmicutes    | Clostridia   | 0                   | 0                    | 0                   | 0                    |
| <b>seq1732</b> | Firmicutes    | Clostridia   | 0                   | 0                    | 0                   | 0                    |
| <b>seq1779</b> | Firmicutes    | Clostridia   | 0                   | 0                    | 0                   | 0                    |
| <b>seq1616</b> | Firmicutes    | Clostridia   | 0                   | 0                    | 0                   | 0                    |
| <b>seq716</b>  | Firmicutes    | Clostridia   | 0                   | 0                    | 0                   | 0                    |
| <b>seq858</b>  | Firmicutes    | Clostridia   | 0                   | 0                    | 0                   | 0                    |

Sequence Count Table

|                | <b>Phylum</b> | <b>Class</b> | <b>Subject23WK0</b> | <b>Subject23WK12</b> | <b>Subject24WK0</b> | <b>Subject24WK12</b> |
|----------------|---------------|--------------|---------------------|----------------------|---------------------|----------------------|
| <b>seq1892</b> | Firmicutes    | Clostridia   | 0                   | 0                    | 0                   | 0                    |
| <b>seq1476</b> | Firmicutes    | Clostridia   | 0                   | 0                    | 0                   | 0                    |
| <b>seq278</b>  | Firmicutes    | Clostridia   | 21                  | 57                   | 31                  | 81                   |
| <b>seq440</b>  | Firmicutes    | Clostridia   | 14                  | 59                   | 34                  | 118                  |
| <b>seq657</b>  | Firmicutes    | Clostridia   | 0                   | 0                    | 0                   | 42                   |
| <b>seq670</b>  | Firmicutes    | Clostridia   | 10                  | 28                   | 0                   | 0                    |
| <b>seq800</b>  | Firmicutes    | Clostridia   | 0                   | 0                    | 0                   | 0                    |
| <b>seq922</b>  | Firmicutes    | Clostridia   | 0                   | 0                    | 0                   | 0                    |
| <b>seq940</b>  | Firmicutes    | Clostridia   | 0                   | 0                    | 0                   | 0                    |
| <b>seq1017</b> | Firmicutes    | Clostridia   | 0                   | 0                    | 0                   | 0                    |
| <b>seq1214</b> | Firmicutes    | Clostridia   | 0                   | 0                    | 0                   | 0                    |
| <b>seq1236</b> | Firmicutes    | Clostridia   | 0                   | 0                    | 0                   | 0                    |
| <b>seq1366</b> | Firmicutes    | Clostridia   | 0                   | 0                    | 0                   | 0                    |
| <b>seq1427</b> | Firmicutes    | Clostridia   | 0                   | 0                    | 0                   | 0                    |
| <b>seq1449</b> | Firmicutes    | Clostridia   | 0                   | 0                    | 0                   | 0                    |
| <b>seq1480</b> | Firmicutes    | Clostridia   | 0                   | 0                    | 0                   | 0                    |
| <b>seq1487</b> | Firmicutes    | Clostridia   | 0                   | 0                    | 0                   | 0                    |
| <b>seq1560</b> | Firmicutes    | Clostridia   | 0                   | 0                    | 0                   | 0                    |
| <b>seq1703</b> | Firmicutes    | Clostridia   | 0                   | 0                    | 0                   | 0                    |
| <b>seq1766</b> | Firmicutes    | Clostridia   | 0                   | 0                    | 0                   | 0                    |
| <b>seq1800</b> | Firmicutes    | Clostridia   | 0                   | 0                    | 0                   | 0                    |
| <b>seq386</b>  | Firmicutes    | Clostridia   | 0                   | 0                    | 55                  | 65                   |
| <b>seq743</b>  | Firmicutes    | Clostridia   | 0                   | 0                    | 0                   | 0                    |
| <b>seq1043</b> | Firmicutes    | Clostridia   | 0                   | 0                    | 0                   | 0                    |
| <b>seq1301</b> | Firmicutes    | Clostridia   | 0                   | 57                   | 0                   | 0                    |
| <b>seq282</b>  | Firmicutes    | Clostridia   | 0                   | 0                    | 0                   | 0                    |
| <b>seq1382</b> | Firmicutes    | Clostridia   | 0                   | 0                    | 0                   | 0                    |
| <b>seq1732</b> | Firmicutes    | Clostridia   | 0                   | 0                    | 0                   | 0                    |
| <b>seq1779</b> | Firmicutes    | Clostridia   | 0                   | 0                    | 0                   | 0                    |
| <b>seq1616</b> | Firmicutes    | Clostridia   | 0                   | 0                    | 0                   | 0                    |
| <b>seq716</b>  | Firmicutes    | Clostridia   | 0                   | 0                    | 0                   | 0                    |
| <b>seq858</b>  | Firmicutes    | Clostridia   | 0                   | 0                    | 0                   | 0                    |

Sequence Count Table

|                | <b>Phylum</b> | <b>Class</b> | <b>Subject11WK0</b> | <b>Subject11WK12</b> | <b>Subject12WK0</b> | <b>Subject12WK12</b> |
|----------------|---------------|--------------|---------------------|----------------------|---------------------|----------------------|
| <b>seq1892</b> | Firmicutes    | Clostridia   | 0                   | 0                    | 0                   | 0                    |
| <b>seq1476</b> | Firmicutes    | Clostridia   | 0                   | 0                    | 0                   | 0                    |
| <b>seq278</b>  | Firmicutes    | Clostridia   | 0                   | 0                    | 38                  | 46                   |
| <b>seq440</b>  | Firmicutes    | Clostridia   | 0                   | 0                    | 17                  | 10                   |
| <b>seq657</b>  | Firmicutes    | Clostridia   | 0                   | 0                    | 22                  | 52                   |
| <b>seq670</b>  | Firmicutes    | Clostridia   | 9                   | 0                    | 0                   | 0                    |
| <b>seq800</b>  | Firmicutes    | Clostridia   | 0                   | 0                    | 0                   | 0                    |
| <b>seq922</b>  | Firmicutes    | Clostridia   | 0                   | 0                    | 0                   | 0                    |
| <b>seq940</b>  | Firmicutes    | Clostridia   | 0                   | 0                    | 0                   | 0                    |
| <b>seq1017</b> | Firmicutes    | Clostridia   | 0                   | 0                    | 0                   | 0                    |
| <b>seq1214</b> | Firmicutes    | Clostridia   | 0                   | 0                    | 0                   | 0                    |
| <b>seq1236</b> | Firmicutes    | Clostridia   | 0                   | 0                    | 0                   | 0                    |
| <b>seq1366</b> | Firmicutes    | Clostridia   | 0                   | 0                    | 0                   | 0                    |
| <b>seq1427</b> | Firmicutes    | Clostridia   | 0                   | 0                    | 0                   | 0                    |
| <b>seq1449</b> | Firmicutes    | Clostridia   | 0                   | 0                    | 0                   | 0                    |
| <b>seq1480</b> | Firmicutes    | Clostridia   | 0                   | 0                    | 0                   | 0                    |
| <b>seq1487</b> | Firmicutes    | Clostridia   | 0                   | 0                    | 0                   | 0                    |
| <b>seq1560</b> | Firmicutes    | Clostridia   | 0                   | 0                    | 0                   | 0                    |
| <b>seq1703</b> | Firmicutes    | Clostridia   | 0                   | 0                    | 0                   | 0                    |
| <b>seq1766</b> | Firmicutes    | Clostridia   | 0                   | 0                    | 0                   | 0                    |
| <b>seq1800</b> | Firmicutes    | Clostridia   | 8                   | 0                    | 0                   | 0                    |
| <b>seq386</b>  | Firmicutes    | Clostridia   | 0                   | 0                    | 0                   | 0                    |
| <b>seq743</b>  | Firmicutes    | Clostridia   | 0                   | 0                    | 54                  | 51                   |
| <b>seq1043</b> | Firmicutes    | Clostridia   | 0                   | 0                    | 0                   | 0                    |
| <b>seq1301</b> | Firmicutes    | Clostridia   | 0                   | 0                    | 0                   | 0                    |
| <b>seq282</b>  | Firmicutes    | Clostridia   | 0                   | 0                    | 0                   | 0                    |
| <b>seq1382</b> | Firmicutes    | Clostridia   | 0                   | 0                    | 0                   | 0                    |
| <b>seq1732</b> | Firmicutes    | Clostridia   | 0                   | 0                    | 0                   | 0                    |
| <b>seq1779</b> | Firmicutes    | Clostridia   | 0                   | 0                    | 0                   | 0                    |
| <b>seq1616</b> | Firmicutes    | Clostridia   | 0                   | 0                    | 0                   | 0                    |
| <b>seq716</b>  | Firmicutes    | Clostridia   | 0                   | 0                    | 0                   | 0                    |
| <b>seq858</b>  | Firmicutes    | Clostridia   | 0                   | 0                    | 0                   | 0                    |

Sequence Count Table

|                | <b>Phylum</b> | <b>Class</b> | <b>Subject25WK0</b> | <b>Subject25WK12</b> | <b>Subject38WK0</b> | <b>Subject38WK12</b> |
|----------------|---------------|--------------|---------------------|----------------------|---------------------|----------------------|
| <b>seq1892</b> | Firmicutes    | Clostridia   | 0                   | 0                    | 0                   | 0                    |
| <b>seq1476</b> | Firmicutes    | Clostridia   | 0                   | 0                    | 0                   | 0                    |
| <b>seq278</b>  | Firmicutes    | Clostridia   | 107                 | 206                  | 0                   | 0                    |
| <b>seq440</b>  | Firmicutes    | Clostridia   | 22                  | 0                    | 0                   | 0                    |
| <b>seq657</b>  | Firmicutes    | Clostridia   | 31                  | 115                  | 0                   | 0                    |
| <b>seq670</b>  | Firmicutes    | Clostridia   | 45                  | 0                    | 0                   | 0                    |
| <b>seq800</b>  | Firmicutes    | Clostridia   | 0                   | 0                    | 0                   | 0                    |
| <b>seq922</b>  | Firmicutes    | Clostridia   | 0                   | 0                    | 0                   | 0                    |
| <b>seq940</b>  | Firmicutes    | Clostridia   | 0                   | 0                    | 0                   | 0                    |
| <b>seq1017</b> | Firmicutes    | Clostridia   | 0                   | 0                    | 0                   | 0                    |
| <b>seq1214</b> | Firmicutes    | Clostridia   | 0                   | 0                    | 0                   | 0                    |
| <b>seq1236</b> | Firmicutes    | Clostridia   | 0                   | 0                    | 0                   | 0                    |
| <b>seq1366</b> | Firmicutes    | Clostridia   | 0                   | 0                    | 0                   | 0                    |
| <b>seq1427</b> | Firmicutes    | Clostridia   | 0                   | 0                    | 0                   | 0                    |
| <b>seq1449</b> | Firmicutes    | Clostridia   | 0                   | 0                    | 0                   | 0                    |
| <b>seq1480</b> | Firmicutes    | Clostridia   | 0                   | 0                    | 0                   | 0                    |
| <b>seq1487</b> | Firmicutes    | Clostridia   | 0                   | 0                    | 0                   | 0                    |
| <b>seq1560</b> | Firmicutes    | Clostridia   | 0                   | 0                    | 0                   | 0                    |
| <b>seq1703</b> | Firmicutes    | Clostridia   | 0                   | 0                    | 0                   | 0                    |
| <b>seq1766</b> | Firmicutes    | Clostridia   | 0                   | 0                    | 0                   | 0                    |
| <b>seq1800</b> | Firmicutes    | Clostridia   | 0                   | 0                    | 0                   | 0                    |
| <b>seq386</b>  | Firmicutes    | Clostridia   | 43                  | 0                    | 0                   | 0                    |
| <b>seq743</b>  | Firmicutes    | Clostridia   | 0                   | 0                    | 0                   | 0                    |
| <b>seq1043</b> | Firmicutes    | Clostridia   | 0                   | 0                    | 0                   | 0                    |
| <b>seq1301</b> | Firmicutes    | Clostridia   | 0                   | 0                    | 0                   | 0                    |
| <b>seq282</b>  | Firmicutes    | Clostridia   | 0                   | 0                    | 0                   | 0                    |
| <b>seq1382</b> | Firmicutes    | Clostridia   | 0                   | 0                    | 0                   | 0                    |
| <b>seq1732</b> | Firmicutes    | Clostridia   | 0                   | 11                   | 0                   | 0                    |
| <b>seq1779</b> | Firmicutes    | Clostridia   | 0                   | 9                    | 0                   | 0                    |
| <b>seq1616</b> | Firmicutes    | Clostridia   | 0                   | 8                    | 0                   | 0                    |
| <b>seq716</b>  | Firmicutes    | Clostridia   | 0                   | 0                    | 0                   | 0                    |
| <b>seq858</b>  | Firmicutes    | Clostridia   | 0                   | 0                    | 0                   | 0                    |

Sequence Count Table

|                | <b>Phylum</b> | <b>Class</b> | <b>Subject31WK0</b> | <b>Subject31WK12</b> | <b>Subject32WK0</b> | <b>Subject32WK12</b> |
|----------------|---------------|--------------|---------------------|----------------------|---------------------|----------------------|
| <b>seq1892</b> | Firmicutes    | Clostridia   | 0                   | 0                    | 0                   | 0                    |
| <b>seq1476</b> | Firmicutes    | Clostridia   | 0                   | 0                    | 0                   | 0                    |
| <b>seq278</b>  | Firmicutes    | Clostridia   | 0                   | 0                    | 0                   | 0                    |
| <b>seq440</b>  | Firmicutes    | Clostridia   | 0                   | 0                    | 0                   | 0                    |
| <b>seq657</b>  | Firmicutes    | Clostridia   | 0                   | 0                    | 0                   | 0                    |
| <b>seq670</b>  | Firmicutes    | Clostridia   | 0                   | 0                    | 6                   | 0                    |
| <b>seq800</b>  | Firmicutes    | Clostridia   | 0                   | 0                    | 0                   | 0                    |
| <b>seq922</b>  | Firmicutes    | Clostridia   | 0                   | 0                    | 0                   | 0                    |
| <b>seq940</b>  | Firmicutes    | Clostridia   | 0                   | 0                    | 0                   | 0                    |
| <b>seq1017</b> | Firmicutes    | Clostridia   | 0                   | 0                    | 0                   | 0                    |
| <b>seq1214</b> | Firmicutes    | Clostridia   | 0                   | 0                    | 0                   | 0                    |
| <b>seq1236</b> | Firmicutes    | Clostridia   | 0                   | 0                    | 0                   | 0                    |
| <b>seq1366</b> | Firmicutes    | Clostridia   | 0                   | 0                    | 0                   | 0                    |
| <b>seq1427</b> | Firmicutes    | Clostridia   | 0                   | 0                    | 0                   | 0                    |
| <b>seq1449</b> | Firmicutes    | Clostridia   | 0                   | 0                    | 0                   | 0                    |
| <b>seq1480</b> | Firmicutes    | Clostridia   | 0                   | 0                    | 0                   | 0                    |
| <b>seq1487</b> | Firmicutes    | Clostridia   | 0                   | 0                    | 0                   | 0                    |
| <b>seq1560</b> | Firmicutes    | Clostridia   | 0                   | 0                    | 0                   | 0                    |
| <b>seq1703</b> | Firmicutes    | Clostridia   | 0                   | 0                    | 0                   | 0                    |
| <b>seq1766</b> | Firmicutes    | Clostridia   | 0                   | 0                    | 0                   | 0                    |
| <b>seq1800</b> | Firmicutes    | Clostridia   | 0                   | 0                    | 0                   | 0                    |
| <b>seq386</b>  | Firmicutes    | Clostridia   | 0                   | 0                    | 0                   | 0                    |
| <b>seq743</b>  | Firmicutes    | Clostridia   | 0                   | 0                    | 0                   | 0                    |
| <b>seq1043</b> | Firmicutes    | Clostridia   | 0                   | 0                    | 0                   | 0                    |
| <b>seq1301</b> | Firmicutes    | Clostridia   | 0                   | 0                    | 0                   | 0                    |
| <b>seq282</b>  | Firmicutes    | Clostridia   | 0                   | 0                    | 0                   | 0                    |
| <b>seq1382</b> | Firmicutes    | Clostridia   | 0                   | 0                    | 0                   | 0                    |
| <b>seq1732</b> | Firmicutes    | Clostridia   | 0                   | 0                    | 0                   | 0                    |
| <b>seq1779</b> | Firmicutes    | Clostridia   | 0                   | 0                    | 0                   | 0                    |
| <b>seq1616</b> | Firmicutes    | Clostridia   | 0                   | 0                    | 0                   | 0                    |
| <b>seq716</b>  | Firmicutes    | Clostridia   | 0                   | 0                    | 0                   | 0                    |
| <b>seq858</b>  | Firmicutes    | Clostridia   | 0                   | 0                    | 0                   | 0                    |

Sequence Count Table

|                | <b>Phylum</b> | <b>Class</b> | <b>Subject13WK0</b> | <b>Subject13WK12</b> | <b>Subject39WK0</b> | <b>Subject39WK12</b> |
|----------------|---------------|--------------|---------------------|----------------------|---------------------|----------------------|
| <b>seq1892</b> | Firmicutes    | Clostridia   | 0                   | 0                    | 0                   | 3                    |
| <b>seq1476</b> | Firmicutes    | Clostridia   | 0                   | 0                    | 0                   | 0                    |
| <b>seq278</b>  | Firmicutes    | Clostridia   | 19                  | 0                    | 0                   | 53                   |
| <b>seq440</b>  | Firmicutes    | Clostridia   | 0                   | 0                    | 0                   | 0                    |
| <b>seq657</b>  | Firmicutes    | Clostridia   | 0                   | 0                    | 0                   | 0                    |
| <b>seq670</b>  | Firmicutes    | Clostridia   | 13                  | 0                    | 0                   | 0                    |
| <b>seq800</b>  | Firmicutes    | Clostridia   | 0                   | 0                    | 0                   | 0                    |
| <b>seq922</b>  | Firmicutes    | Clostridia   | 13                  | 0                    | 0                   | 0                    |
| <b>seq940</b>  | Firmicutes    | Clostridia   | 0                   | 0                    | 0                   | 0                    |
| <b>seq1017</b> | Firmicutes    | Clostridia   | 0                   | 0                    | 0                   | 0                    |
| <b>seq1214</b> | Firmicutes    | Clostridia   | 0                   | 0                    | 0                   | 0                    |
| <b>seq1236</b> | Firmicutes    | Clostridia   | 36                  | 0                    | 0                   | 0                    |
| <b>seq1366</b> | Firmicutes    | Clostridia   | 0                   | 0                    | 0                   | 0                    |
| <b>seq1427</b> | Firmicutes    | Clostridia   | 0                   | 0                    | 0                   | 0                    |
| <b>seq1449</b> | Firmicutes    | Clostridia   | 0                   | 0                    | 0                   | 0                    |
| <b>seq1480</b> | Firmicutes    | Clostridia   | 0                   | 31                   | 0                   | 0                    |
| <b>seq1487</b> | Firmicutes    | Clostridia   | 0                   | 0                    | 0                   | 0                    |
| <b>seq1560</b> | Firmicutes    | Clostridia   | 0                   | 23                   | 0                   | 0                    |
| <b>seq1703</b> | Firmicutes    | Clostridia   | 0                   | 13                   | 0                   | 0                    |
| <b>seq1766</b> | Firmicutes    | Clostridia   | 0                   | 0                    | 0                   | 0                    |
| <b>seq1800</b> | Firmicutes    | Clostridia   | 0                   | 0                    | 0                   | 0                    |
| <b>seq386</b>  | Firmicutes    | Clostridia   | 27                  | 33                   | 0                   | 0                    |
| <b>seq743</b>  | Firmicutes    | Clostridia   | 0                   | 0                    | 0                   | 0                    |
| <b>seq1043</b> | Firmicutes    | Clostridia   | 0                   | 0                    | 0                   | 0                    |
| <b>seq1301</b> | Firmicutes    | Clostridia   | 0                   | 0                    | 0                   | 0                    |
| <b>seq282</b>  | Firmicutes    | Clostridia   | 0                   | 0                    | 0                   | 0                    |
| <b>seq1382</b> | Firmicutes    | Clostridia   | 0                   | 0                    | 0                   | 0                    |
| <b>seq1732</b> | Firmicutes    | Clostridia   | 0                   | 0                    | 0                   | 0                    |
| <b>seq1779</b> | Firmicutes    | Clostridia   | 0                   | 0                    | 0                   | 0                    |
| <b>seq1616</b> | Firmicutes    | Clostridia   | 0                   | 0                    | 0                   | 0                    |
| <b>seq716</b>  | Firmicutes    | Clostridia   | 0                   | 0                    | 0                   | 0                    |
| <b>seq858</b>  | Firmicutes    | Clostridia   | 0                   | 0                    | 0                   | 0                    |

Sequence Count Table

|                | <b>Phylum</b> | <b>Class</b> | <b>Subject26WK0</b> | <b>Subject26WK12</b> | <b>Subject14WK0</b> | <b>Subject14WK12</b> |
|----------------|---------------|--------------|---------------------|----------------------|---------------------|----------------------|
| <b>seq1892</b> | Firmicutes    | Clostridia   | 0                   | 0                    | 0                   | 0                    |
| <b>seq1476</b> | Firmicutes    | Clostridia   | 0                   | 0                    | 0                   | 0                    |
| <b>seq278</b>  | Firmicutes    | Clostridia   | 0                   | 0                    | 48                  | 96                   |
| <b>seq440</b>  | Firmicutes    | Clostridia   | 0                   | 0                    | 0                   | 0                    |
| <b>seq657</b>  | Firmicutes    | Clostridia   | 0                   | 0                    | 0                   | 0                    |
| <b>seq670</b>  | Firmicutes    | Clostridia   | 46                  | 0                    | 0                   | 0                    |
| <b>seq800</b>  | Firmicutes    | Clostridia   | 0                   | 20                   | 0                   | 0                    |
| <b>seq922</b>  | Firmicutes    | Clostridia   | 0                   | 0                    | 0                   | 0                    |
| <b>seq940</b>  | Firmicutes    | Clostridia   | 0                   | 0                    | 36                  | 36                   |
| <b>seq1017</b> | Firmicutes    | Clostridia   | 0                   | 0                    | 0                   | 0                    |
| <b>seq1214</b> | Firmicutes    | Clostridia   | 0                   | 0                    | 0                   | 23                   |
| <b>seq1236</b> | Firmicutes    | Clostridia   | 0                   | 0                    | 0                   | 0                    |
| <b>seq1366</b> | Firmicutes    | Clostridia   | 0                   | 0                    | 0                   | 0                    |
| <b>seq1427</b> | Firmicutes    | Clostridia   | 0                   | 0                    | 0                   | 0                    |
| <b>seq1449</b> | Firmicutes    | Clostridia   | 0                   | 0                    | 0                   | 0                    |
| <b>seq1480</b> | Firmicutes    | Clostridia   | 0                   | 0                    | 0                   | 0                    |
| <b>seq1487</b> | Firmicutes    | Clostridia   | 0                   | 0                    | 0                   | 0                    |
| <b>seq1560</b> | Firmicutes    | Clostridia   | 0                   | 0                    | 0                   | 0                    |
| <b>seq1703</b> | Firmicutes    | Clostridia   | 0                   | 0                    | 0                   | 0                    |
| <b>seq1766</b> | Firmicutes    | Clostridia   | 0                   | 0                    | 0                   | 0                    |
| <b>seq1800</b> | Firmicutes    | Clostridia   | 0                   | 0                    | 0                   | 0                    |
| <b>seq386</b>  | Firmicutes    | Clostridia   | 0                   | 0                    | 0                   | 0                    |
| <b>seq743</b>  | Firmicutes    | Clostridia   | 0                   | 0                    | 67                  | 38                   |
| <b>seq1043</b> | Firmicutes    | Clostridia   | 0                   | 0                    | 0                   | 0                    |
| <b>seq1301</b> | Firmicutes    | Clostridia   | 0                   | 0                    | 0                   | 0                    |
| <b>seq282</b>  | Firmicutes    | Clostridia   | 0                   | 0                    | 0                   | 0                    |
| <b>seq1382</b> | Firmicutes    | Clostridia   | 0                   | 0                    | 0                   | 0                    |
| <b>seq1732</b> | Firmicutes    | Clostridia   | 0                   | 0                    | 0                   | 0                    |
| <b>seq1779</b> | Firmicutes    | Clostridia   | 0                   | 0                    | 0                   | 0                    |
| <b>seq1616</b> | Firmicutes    | Clostridia   | 0                   | 0                    | 0                   | 0                    |
| <b>seq716</b>  | Firmicutes    | Clostridia   | 0                   | 0                    | 0                   | 0                    |
| <b>seq858</b>  | Firmicutes    | Clostridia   | 0                   | 0                    | 0                   | 0                    |

Sequence Count Table

|                | <b>Phylum</b> | <b>Class</b> | <b>Subject27WK0</b> | <b>Subject27WK12</b> | <b>Subject15WK0</b> | <b>Subject15WK12</b> |
|----------------|---------------|--------------|---------------------|----------------------|---------------------|----------------------|
| <b>seq1892</b> | Firmicutes    | Clostridia   | 0                   | 0                    | 0                   | 0                    |
| <b>seq1476</b> | Firmicutes    | Clostridia   | 0                   | 0                    | 0                   | 0                    |
| <b>seq278</b>  | Firmicutes    | Clostridia   | 0                   | 0                    | 0                   | 0                    |
| <b>seq440</b>  | Firmicutes    | Clostridia   | 0                   | 0                    | 0                   | 0                    |
| <b>seq657</b>  | Firmicutes    | Clostridia   | 0                   | 0                    | 0                   | 0                    |
| <b>seq670</b>  | Firmicutes    | Clostridia   | 0                   | 0                    | 0                   | 0                    |
| <b>seq800</b>  | Firmicutes    | Clostridia   | 0                   | 0                    | 7                   | 0                    |
| <b>seq922</b>  | Firmicutes    | Clostridia   | 0                   | 0                    | 0                   | 0                    |
| <b>seq940</b>  | Firmicutes    | Clostridia   | 0                   | 0                    | 0                   | 0                    |
| <b>seq1017</b> | Firmicutes    | Clostridia   | 0                   | 0                    | 0                   | 0                    |
| <b>seq1214</b> | Firmicutes    | Clostridia   | 0                   | 0                    | 0                   | 0                    |
| <b>seq1236</b> | Firmicutes    | Clostridia   | 0                   | 0                    | 0                   | 0                    |
| <b>seq1366</b> | Firmicutes    | Clostridia   | 0                   | 0                    | 0                   | 0                    |
| <b>seq1427</b> | Firmicutes    | Clostridia   | 0                   | 0                    | 0                   | 0                    |
| <b>seq1449</b> | Firmicutes    | Clostridia   | 0                   | 0                    | 0                   | 0                    |
| <b>seq1480</b> | Firmicutes    | Clostridia   | 0                   | 0                    | 0                   | 0                    |
| <b>seq1487</b> | Firmicutes    | Clostridia   | 0                   | 0                    | 0                   | 0                    |
| <b>seq1560</b> | Firmicutes    | Clostridia   | 0                   | 0                    | 0                   | 0                    |
| <b>seq1703</b> | Firmicutes    | Clostridia   | 0                   | 0                    | 0                   | 0                    |
| <b>seq1766</b> | Firmicutes    | Clostridia   | 0                   | 0                    | 0                   | 0                    |
| <b>seq1800</b> | Firmicutes    | Clostridia   | 0                   | 0                    | 0                   | 0                    |
| <b>seq386</b>  | Firmicutes    | Clostridia   | 0                   | 0                    | 14                  | 6                    |
| <b>seq743</b>  | Firmicutes    | Clostridia   | 0                   | 0                    | 0                   | 0                    |
| <b>seq1043</b> | Firmicutes    | Clostridia   | 0                   | 0                    | 0                   | 0                    |
| <b>seq1301</b> | Firmicutes    | Clostridia   | 0                   | 0                    | 0                   | 0                    |
| <b>seq282</b>  | Firmicutes    | Clostridia   | 0                   | 0                    | 0                   | 0                    |
| <b>seq1382</b> | Firmicutes    | Clostridia   | 0                   | 9                    | 0                   | 0                    |
| <b>seq1732</b> | Firmicutes    | Clostridia   | 0                   | 0                    | 0                   | 0                    |
| <b>seq1779</b> | Firmicutes    | Clostridia   | 0                   | 0                    | 0                   | 0                    |
| <b>seq1616</b> | Firmicutes    | Clostridia   | 0                   | 0                    | 0                   | 0                    |
| <b>seq716</b>  | Firmicutes    | Clostridia   | 0                   | 0                    | 0                   | 0                    |
| <b>seq858</b>  | Firmicutes    | Clostridia   | 45                  | 25                   | 0                   | 0                    |



Sequence Count Table

|                | <b>Phylum</b> | <b>Class</b> | <b>Δ</b> |  |  |  |
|----------------|---------------|--------------|----------|--|--|--|
| <b>seq1892</b> | Firmicutes    | Clostridia   |          |  |  |  |
| <b>seq1476</b> | Firmicutes    | Clostridia   |          |  |  |  |
| <b>seq278</b>  | Firmicutes    | Clostridia   |          |  |  |  |
| <b>seq440</b>  | Firmicutes    | Clostridia   |          |  |  |  |
| <b>seq657</b>  | Firmicutes    | Clostridia   |          |  |  |  |
| <b>seq670</b>  | Firmicutes    | Clostridia   |          |  |  |  |
| <b>seq800</b>  | Firmicutes    | Clostridia   |          |  |  |  |
| <b>seq922</b>  | Firmicutes    | Clostridia   |          |  |  |  |
| <b>seq940</b>  | Firmicutes    | Clostridia   |          |  |  |  |
| <b>seq1017</b> | Firmicutes    | Clostridia   |          |  |  |  |
| <b>seq1214</b> | Firmicutes    | Clostridia   |          |  |  |  |
| <b>seq1236</b> | Firmicutes    | Clostridia   |          |  |  |  |
| <b>seq1366</b> | Firmicutes    | Clostridia   |          |  |  |  |
| <b>seq1427</b> | Firmicutes    | Clostridia   |          |  |  |  |
| <b>seq1449</b> | Firmicutes    | Clostridia   |          |  |  |  |
| <b>seq1480</b> | Firmicutes    | Clostridia   |          |  |  |  |
| <b>seq1487</b> | Firmicutes    | Clostridia   |          |  |  |  |
| <b>seq1560</b> | Firmicutes    | Clostridia   |          |  |  |  |
| <b>seq1703</b> | Firmicutes    | Clostridia   |          |  |  |  |
| <b>seq1766</b> | Firmicutes    | Clostridia   |          |  |  |  |
| <b>seq1800</b> | Firmicutes    | Clostridia   |          |  |  |  |
| <b>seq386</b>  | Firmicutes    | Clostridia   |          |  |  |  |
| <b>seq743</b>  | Firmicutes    | Clostridia   |          |  |  |  |
| <b>seq1043</b> | Firmicutes    | Clostridia   |          |  |  |  |
| <b>seq1301</b> | Firmicutes    | Clostridia   |          |  |  |  |
| <b>seq282</b>  | Firmicutes    | Clostridia   |          |  |  |  |
| <b>seq1382</b> | Firmicutes    | Clostridia   |          |  |  |  |
| <b>seq1732</b> | Firmicutes    | Clostridia   |          |  |  |  |
| <b>seq1779</b> | Firmicutes    | Clostridia   |          |  |  |  |
| <b>seq1616</b> | Firmicutes    | Clostridia   |          |  |  |  |
| <b>seq716</b>  | Firmicutes    | Clostridia   |          |  |  |  |
| <b>seq858</b>  | Firmicutes    | Clostridia   |          |  |  |  |

Sequence Count Table

|                | <b>Phylum</b> | <b>Class</b> | <b>Order</b>  | <b>Family</b>   |
|----------------|---------------|--------------|---------------|-----------------|
| <b>seq897</b>  | Firmicutes    | Clostridia   | Clostridiales | Family_XIII     |
| <b>seq1077</b> | Firmicutes    | Clostridia   | Clostridiales | Family_XIII     |
| <b>seq1081</b> | Firmicutes    | Clostridia   | Clostridiales | Family_XIII     |
| <b>seq1137</b> | Firmicutes    | Clostridia   | Clostridiales | Family_XIII     |
| <b>seq1195</b> | Firmicutes    | Clostridia   | Clostridiales | Family_XIII     |
| <b>seq1291</b> | Firmicutes    | Clostridia   | Clostridiales | Family_XIII     |
| <b>seq1313</b> | Firmicutes    | Clostridia   | Clostridiales | Family_XIII     |
| <b>seq1356</b> | Firmicutes    | Clostridia   | Clostridiales | Family_XIII     |
| <b>seq1455</b> | Firmicutes    | Clostridia   | Clostridiales | Family_XIII     |
| <b>seq1463</b> | Firmicutes    | Clostridia   | Clostridiales | Family_XIII     |
| <b>seq1501</b> | Firmicutes    | Clostridia   | Clostridiales | Family_XIII     |
| <b>seq1595</b> | Firmicutes    | Clostridia   | Clostridiales | Family_XIII     |
| <b>seq1624</b> | Firmicutes    | Clostridia   | Clostridiales | Family_XIII     |
| <b>seq2</b>    | Firmicutes    | Clostridia   | Clostridiales | Lachnospiraceae |
| <b>seq26</b>   | Firmicutes    | Clostridia   | Clostridiales | Lachnospiraceae |
| <b>seq98</b>   | Firmicutes    | Clostridia   | Clostridiales | Lachnospiraceae |
| <b>seq208</b>  | Firmicutes    | Clostridia   | Clostridiales | Lachnospiraceae |
| <b>seq219</b>  | Firmicutes    | Clostridia   | Clostridiales | Lachnospiraceae |
| <b>seq310</b>  | Firmicutes    | Clostridia   | Clostridiales | Lachnospiraceae |
| <b>seq320</b>  | Firmicutes    | Clostridia   | Clostridiales | Lachnospiraceae |
| <b>seq349</b>  | Firmicutes    | Clostridia   | Clostridiales | Lachnospiraceae |
| <b>seq373</b>  | Firmicutes    | Clostridia   | Clostridiales | Lachnospiraceae |
| <b>seq394</b>  | Firmicutes    | Clostridia   | Clostridiales | Lachnospiraceae |
| <b>seq402</b>  | Firmicutes    | Clostridia   | Clostridiales | Lachnospiraceae |
| <b>seq448</b>  | Firmicutes    | Clostridia   | Clostridiales | Lachnospiraceae |
| <b>seq591</b>  | Firmicutes    | Clostridia   | Clostridiales | Lachnospiraceae |
| <b>seq663</b>  | Firmicutes    | Clostridia   | Clostridiales | Lachnospiraceae |
| <b>seq895</b>  | Firmicutes    | Clostridia   | Clostridiales | Lachnospiraceae |
| <b>seq927</b>  | Firmicutes    | Clostridia   | Clostridiales | Lachnospiraceae |
| <b>seq1426</b> | Firmicutes    | Clostridia   | Clostridiales | Lachnospiraceae |
| <b>seq21</b>   | Firmicutes    | Clostridia   | Clostridiales | Lachnospiraceae |
| <b>seq58</b>   | Firmicutes    | Clostridia   | Clostridiales | Lachnospiraceae |

Sequence Count Table

|                | <b>Phylum</b> | <b>Class</b> | <b>Genus</b> | <b>Species</b> |
|----------------|---------------|--------------|--------------|----------------|
| <b>seq897</b>  | Firmicutes    | Clostridia   |              |                |
| <b>seq1077</b> | Firmicutes    | Clostridia   |              |                |
| <b>seq1081</b> | Firmicutes    | Clostridia   |              |                |
| <b>seq1137</b> | Firmicutes    | Clostridia   |              |                |
| <b>seq1195</b> | Firmicutes    | Clostridia   |              |                |
| <b>seq1291</b> | Firmicutes    | Clostridia   |              |                |
| <b>seq1313</b> | Firmicutes    | Clostridia   |              |                |
| <b>seq1356</b> | Firmicutes    | Clostridia   |              |                |
| <b>seq1455</b> | Firmicutes    | Clostridia   |              |                |
| <b>seq1463</b> | Firmicutes    | Clostridia   |              |                |
| <b>seq1501</b> | Firmicutes    | Clostridia   |              |                |
| <b>seq1595</b> | Firmicutes    | Clostridia   |              |                |
| <b>seq1624</b> | Firmicutes    | Clostridia   |              |                |
| <b>seq2</b>    | Firmicutes    | Clostridia   | Agathobacter |                |
| <b>seq26</b>   | Firmicutes    | Clostridia   | Agathobacter |                |
| <b>seq98</b>   | Firmicutes    | Clostridia   | Agathobacter |                |
| <b>seq208</b>  | Firmicutes    | Clostridia   | Agathobacter |                |
| <b>seq219</b>  | Firmicutes    | Clostridia   | Agathobacter |                |
| <b>seq310</b>  | Firmicutes    | Clostridia   | Agathobacter |                |
| <b>seq320</b>  | Firmicutes    | Clostridia   | Agathobacter |                |
| <b>seq349</b>  | Firmicutes    | Clostridia   | Agathobacter |                |
| <b>seq373</b>  | Firmicutes    | Clostridia   | Agathobacter |                |
| <b>seq394</b>  | Firmicutes    | Clostridia   | Agathobacter |                |
| <b>seq402</b>  | Firmicutes    | Clostridia   | Agathobacter |                |
| <b>seq448</b>  | Firmicutes    | Clostridia   | Agathobacter |                |
| <b>seq591</b>  | Firmicutes    | Clostridia   | Agathobacter |                |
| <b>seq663</b>  | Firmicutes    | Clostridia   | Agathobacter |                |
| <b>seq895</b>  | Firmicutes    | Clostridia   | Agathobacter |                |
| <b>seq927</b>  | Firmicutes    | Clostridia   | Agathobacter |                |
| <b>seq1426</b> | Firmicutes    | Clostridia   | Agathobacter |                |
| <b>seq21</b>   | Firmicutes    | Clostridia   | Anaerostipes | hadrus         |
| <b>seq58</b>   | Firmicutes    | Clostridia   | Anaerostipes | hadrus         |

Sequence Count Table

|                | <b>Phylum</b> | <b>Class</b> | <b>Subject34WK0</b> | <b>Subject34WK12</b> | <b>Subject16WK0</b> | <b>Subject16WK12</b> |
|----------------|---------------|--------------|---------------------|----------------------|---------------------|----------------------|
| <b>seq897</b>  | Firmicutes    | Clostridia   | 0                   | 0                    | 0                   | 0                    |
| <b>seq1077</b> | Firmicutes    | Clostridia   | 0                   | 0                    | 0                   | 0                    |
| <b>seq1081</b> | Firmicutes    | Clostridia   | 0                   | 0                    | 0                   | 0                    |
| <b>seq1137</b> | Firmicutes    | Clostridia   | 0                   | 42                   | 0                   | 0                    |
| <b>seq1195</b> | Firmicutes    | Clostridia   | 0                   | 0                    | 0                   | 0                    |
| <b>seq1291</b> | Firmicutes    | Clostridia   | 0                   | 0                    | 0                   | 0                    |
| <b>seq1313</b> | Firmicutes    | Clostridia   | 0                   | 0                    | 0                   | 0                    |
| <b>seq1356</b> | Firmicutes    | Clostridia   | 0                   | 0                    | 0                   | 0                    |
| <b>seq1455</b> | Firmicutes    | Clostridia   | 0                   | 0                    | 0                   | 0                    |
| <b>seq1463</b> | Firmicutes    | Clostridia   | 0                   | 0                    | 0                   | 0                    |
| <b>seq1501</b> | Firmicutes    | Clostridia   | 0                   | 0                    | 0                   | 0                    |
| <b>seq1595</b> | Firmicutes    | Clostridia   | 0                   | 0                    | 0                   | 0                    |
| <b>seq1624</b> | Firmicutes    | Clostridia   | 0                   | 0                    | 0                   | 0                    |
| <b>seq2</b>    | Firmicutes    | Clostridia   | 303                 | 5623                 | 993                 | 4001                 |
| <b>seq26</b>   | Firmicutes    | Clostridia   | 302                 | 1398                 | 1889                | 459                  |
| <b>seq98</b>   | Firmicutes    | Clostridia   | 0                   | 343                  | 198                 | 182                  |
| <b>seq208</b>  | Firmicutes    | Clostridia   | 0                   | 0                    | 0                   | 0                    |
| <b>seq219</b>  | Firmicutes    | Clostridia   | 0                   | 0                    | 0                   | 0                    |
| <b>seq310</b>  | Firmicutes    | Clostridia   | 0                   | 0                    | 0                   | 0                    |
| <b>seq320</b>  | Firmicutes    | Clostridia   | 0                   | 0                    | 57                  | 49                   |
| <b>seq349</b>  | Firmicutes    | Clostridia   | 0                   | 0                    | 0                   | 0                    |
| <b>seq373</b>  | Firmicutes    | Clostridia   | 0                   | 0                    | 0                   | 0                    |
| <b>seq394</b>  | Firmicutes    | Clostridia   | 0                   | 0                    | 0                   | 0                    |
| <b>seq402</b>  | Firmicutes    | Clostridia   | 0                   | 0                    | 0                   | 0                    |
| <b>seq448</b>  | Firmicutes    | Clostridia   | 78                  | 921                  | 0                   | 0                    |
| <b>seq591</b>  | Firmicutes    | Clostridia   | 0                   | 0                    | 0                   | 0                    |
| <b>seq663</b>  | Firmicutes    | Clostridia   | 0                   | 0                    | 0                   | 0                    |
| <b>seq895</b>  | Firmicutes    | Clostridia   | 0                   | 0                    | 0                   | 0                    |
| <b>seq927</b>  | Firmicutes    | Clostridia   | 0                   | 0                    | 0                   | 0                    |
| <b>seq1426</b> | Firmicutes    | Clostridia   | 0                   | 0                    | 0                   | 0                    |
| <b>seq21</b>   | Firmicutes    | Clostridia   | 43                  | 87                   | 396                 | 983                  |
| <b>seq58</b>   | Firmicutes    | Clostridia   | 0                   | 121                  | 101                 | 371                  |

Sequence Count Table

|                | <b>Phylum</b> | <b>Class</b> | <b>Subject17WK0</b> | <b>Subject17WK12</b> | <b>Subject1WK0</b> | <b>Subject1WK12</b> |
|----------------|---------------|--------------|---------------------|----------------------|--------------------|---------------------|
| <b>seq897</b>  | Firmicutes    | Clostridia   | 0                   | 0                    | 44                 | 47                  |
| <b>seq1077</b> | Firmicutes    | Clostridia   | 0                   | 0                    | 0                  | 0                   |
| <b>seq1081</b> | Firmicutes    | Clostridia   | 0                   | 0                    | 0                  | 0                   |
| <b>seq1137</b> | Firmicutes    | Clostridia   | 0                   | 0                    | 0                  | 0                   |
| <b>seq1195</b> | Firmicutes    | Clostridia   | 0                   | 0                    | 0                  | 0                   |
| <b>seq1291</b> | Firmicutes    | Clostridia   | 0                   | 0                    | 0                  | 0                   |
| <b>seq1313</b> | Firmicutes    | Clostridia   | 0                   | 0                    | 0                  | 0                   |
| <b>seq1356</b> | Firmicutes    | Clostridia   | 0                   | 0                    | 0                  | 0                   |
| <b>seq1455</b> | Firmicutes    | Clostridia   | 0                   | 0                    | 15                 | 0                   |
| <b>seq1463</b> | Firmicutes    | Clostridia   | 0                   | 0                    | 0                  | 0                   |
| <b>seq1501</b> | Firmicutes    | Clostridia   | 0                   | 0                    | 0                  | 0                   |
| <b>seq1595</b> | Firmicutes    | Clostridia   | 0                   | 0                    | 0                  | 0                   |
| <b>seq1624</b> | Firmicutes    | Clostridia   | 0                   | 0                    | 0                  | 0                   |
| <b>seq2</b>    | Firmicutes    | Clostridia   | 5009                | 2445                 | 6948               | 6802                |
| <b>seq26</b>   | Firmicutes    | Clostridia   | 0                   | 0                    | 696                | 762                 |
| <b>seq98</b>   | Firmicutes    | Clostridia   | 22                  | 89                   | 0                  | 0                   |
| <b>seq208</b>  | Firmicutes    | Clostridia   | 0                   | 0                    | 0                  | 0                   |
| <b>seq219</b>  | Firmicutes    | Clostridia   | 0                   | 0                    | 0                  | 0                   |
| <b>seq310</b>  | Firmicutes    | Clostridia   | 0                   | 0                    | 0                  | 0                   |
| <b>seq320</b>  | Firmicutes    | Clostridia   | 0                   | 0                    | 0                  | 0                   |
| <b>seq349</b>  | Firmicutes    | Clostridia   | 0                   | 0                    | 0                  | 0                   |
| <b>seq373</b>  | Firmicutes    | Clostridia   | 886                 | 549                  | 0                  | 0                   |
| <b>seq394</b>  | Firmicutes    | Clostridia   | 0                   | 0                    | 0                  | 0                   |
| <b>seq402</b>  | Firmicutes    | Clostridia   | 0                   | 0                    | 0                  | 0                   |
| <b>seq448</b>  | Firmicutes    | Clostridia   | 0                   | 0                    | 0                  | 0                   |
| <b>seq591</b>  | Firmicutes    | Clostridia   | 0                   | 0                    | 0                  | 0                   |
| <b>seq663</b>  | Firmicutes    | Clostridia   | 0                   | 0                    | 0                  | 0                   |
| <b>seq895</b>  | Firmicutes    | Clostridia   | 0                   | 0                    | 0                  | 0                   |
| <b>seq927</b>  | Firmicutes    | Clostridia   | 0                   | 0                    | 0                  | 0                   |
| <b>seq1426</b> | Firmicutes    | Clostridia   | 0                   | 0                    | 0                  | 0                   |
| <b>seq21</b>   | Firmicutes    | Clostridia   | 556                 | 1630                 | 2801               | 3202                |
| <b>seq58</b>   | Firmicutes    | Clostridia   | 235                 | 423                  | 269                | 395                 |

Sequence Count Table

|                | <b>Phylum</b> | <b>Class</b> | <b>Subject2WK0</b> | <b>Subject2WK12</b> | <b>Subject3WK0</b> | <b>Subject3WK12</b> |
|----------------|---------------|--------------|--------------------|---------------------|--------------------|---------------------|
| <b>seq897</b>  | Firmicutes    | Clostridia   | 0                  | 0                   | 0                  | 0                   |
| <b>seq1077</b> | Firmicutes    | Clostridia   | 0                  | 0                   | 0                  | 0                   |
| <b>seq1081</b> | Firmicutes    | Clostridia   | 0                  | 0                   | 0                  | 0                   |
| <b>seq1137</b> | Firmicutes    | Clostridia   | 0                  | 0                   | 0                  | 0                   |
| <b>seq1195</b> | Firmicutes    | Clostridia   | 0                  | 0                   | 0                  | 0                   |
| <b>seq1291</b> | Firmicutes    | Clostridia   | 0                  | 0                   | 0                  | 0                   |
| <b>seq1313</b> | Firmicutes    | Clostridia   | 0                  | 0                   | 0                  | 0                   |
| <b>seq1356</b> | Firmicutes    | Clostridia   | 0                  | 0                   | 0                  | 0                   |
| <b>seq1455</b> | Firmicutes    | Clostridia   | 0                  | 0                   | 0                  | 0                   |
| <b>seq1463</b> | Firmicutes    | Clostridia   | 0                  | 0                   | 0                  | 0                   |
| <b>seq1501</b> | Firmicutes    | Clostridia   | 0                  | 0                   | 0                  | 0                   |
| <b>seq1595</b> | Firmicutes    | Clostridia   | 0                  | 0                   | 0                  | 0                   |
| <b>seq1624</b> | Firmicutes    | Clostridia   | 0                  | 0                   | 0                  | 0                   |
| <b>seq2</b>    | Firmicutes    | Clostridia   | 3817               | 1463                | 0                  | 6791                |
| <b>seq26</b>   | Firmicutes    | Clostridia   | 103                | 0                   | 1129               | 0                   |
| <b>seq98</b>   | Firmicutes    | Clostridia   | 442                | 631                 | 0                  | 0                   |
| <b>seq208</b>  | Firmicutes    | Clostridia   | 0                  | 0                   | 0                  | 0                   |
| <b>seq219</b>  | Firmicutes    | Clostridia   | 0                  | 0                   | 0                  | 0                   |
| <b>seq310</b>  | Firmicutes    | Clostridia   | 0                  | 0                   | 0                  | 0                   |
| <b>seq320</b>  | Firmicutes    | Clostridia   | 0                  | 0                   | 0                  | 0                   |
| <b>seq349</b>  | Firmicutes    | Clostridia   | 0                  | 0                   | 0                  | 1568                |
| <b>seq373</b>  | Firmicutes    | Clostridia   | 0                  | 0                   | 0                  | 0                   |
| <b>seq394</b>  | Firmicutes    | Clostridia   | 0                  | 0                   | 0                  | 0                   |
| <b>seq402</b>  | Firmicutes    | Clostridia   | 0                  | 0                   | 0                  | 0                   |
| <b>seq448</b>  | Firmicutes    | Clostridia   | 0                  | 0                   | 0                  | 0                   |
| <b>seq591</b>  | Firmicutes    | Clostridia   | 0                  | 0                   | 0                  | 0                   |
| <b>seq663</b>  | Firmicutes    | Clostridia   | 0                  | 0                   | 0                  | 0                   |
| <b>seq895</b>  | Firmicutes    | Clostridia   | 80                 | 120                 | 0                  | 0                   |
| <b>seq927</b>  | Firmicutes    | Clostridia   | 0                  | 0                   | 0                  | 0                   |
| <b>seq1426</b> | Firmicutes    | Clostridia   | 0                  | 0                   | 0                  | 0                   |
| <b>seq21</b>   | Firmicutes    | Clostridia   | 2965               | 2078                | 0                  | 0                   |
| <b>seq58</b>   | Firmicutes    | Clostridia   | 1181               | 1190                | 0                  | 0                   |

Sequence Count Table

|                | <b>Phylum</b> | <b>Class</b> | <b>Subject4WK0</b> | <b>Subject4WK12</b> | <b>Subject5WK0</b> | <b>Subject5WK12</b> |
|----------------|---------------|--------------|--------------------|---------------------|--------------------|---------------------|
| <b>seq897</b>  | Firmicutes    | Clostridia   | 0                  | 0                   | 0                  | 0                   |
| <b>seq1077</b> | Firmicutes    | Clostridia   | 45                 | 68                  | 0                  | 0                   |
| <b>seq1081</b> | Firmicutes    | Clostridia   | 0                  | 0                   | 9                  | 0                   |
| <b>seq1137</b> | Firmicutes    | Clostridia   | 0                  | 0                   | 0                  | 0                   |
| <b>seq1195</b> | Firmicutes    | Clostridia   | 0                  | 0                   | 0                  | 0                   |
| <b>seq1291</b> | Firmicutes    | Clostridia   | 0                  | 0                   | 0                  | 0                   |
| <b>seq1313</b> | Firmicutes    | Clostridia   | 12                 | 9                   | 0                  | 0                   |
| <b>seq1356</b> | Firmicutes    | Clostridia   | 0                  | 0                   | 0                  | 0                   |
| <b>seq1455</b> | Firmicutes    | Clostridia   | 0                  | 0                   | 0                  | 0                   |
| <b>seq1463</b> | Firmicutes    | Clostridia   | 0                  | 0                   | 0                  | 0                   |
| <b>seq1501</b> | Firmicutes    | Clostridia   | 0                  | 0                   | 0                  | 0                   |
| <b>seq1595</b> | Firmicutes    | Clostridia   | 0                  | 0                   | 0                  | 0                   |
| <b>seq1624</b> | Firmicutes    | Clostridia   | 0                  | 0                   | 0                  | 0                   |
| <b>seq2</b>    | Firmicutes    | Clostridia   | 4796               | 1019                | 13293              | 17592               |
| <b>seq26</b>   | Firmicutes    | Clostridia   | 2117               | 1278                | 0                  | 0                   |
| <b>seq98</b>   | Firmicutes    | Clostridia   | 151                | 630                 | 0                  | 0                   |
| <b>seq208</b>  | Firmicutes    | Clostridia   | 0                  | 0                   | 0                  | 0                   |
| <b>seq219</b>  | Firmicutes    | Clostridia   | 0                  | 0                   | 0                  | 0                   |
| <b>seq310</b>  | Firmicutes    | Clostridia   | 663                | 1442                | 0                  | 0                   |
| <b>seq320</b>  | Firmicutes    | Clostridia   | 0                  | 0                   | 0                  | 0                   |
| <b>seq349</b>  | Firmicutes    | Clostridia   | 0                  | 0                   | 0                  | 0                   |
| <b>seq373</b>  | Firmicutes    | Clostridia   | 0                  | 0                   | 0                  | 0                   |
| <b>seq394</b>  | Firmicutes    | Clostridia   | 0                  | 0                   | 0                  | 0                   |
| <b>seq402</b>  | Firmicutes    | Clostridia   | 0                  | 0                   | 0                  | 0                   |
| <b>seq448</b>  | Firmicutes    | Clostridia   | 0                  | 0                   | 0                  | 0                   |
| <b>seq591</b>  | Firmicutes    | Clostridia   | 0                  | 0                   | 0                  | 0                   |
| <b>seq663</b>  | Firmicutes    | Clostridia   | 0                  | 0                   | 0                  | 0                   |
| <b>seq895</b>  | Firmicutes    | Clostridia   | 0                  | 0                   | 0                  | 0                   |
| <b>seq927</b>  | Firmicutes    | Clostridia   | 0                  | 0                   | 0                  | 0                   |
| <b>seq1426</b> | Firmicutes    | Clostridia   | 0                  | 0                   | 0                  | 0                   |
| <b>seq21</b>   | Firmicutes    | Clostridia   | 756                | 0                   | 1430               | 1466                |
| <b>seq58</b>   | Firmicutes    | Clostridia   | 446                | 49                  | 1827               | 2199                |

Sequence Count Table

|                | <b>Phylum</b> | <b>Class</b> | <b>Subject6WK0</b> | <b>Subject6WK12</b> | <b>Subject18WK0</b> | <b>Subject18WK12</b> |
|----------------|---------------|--------------|--------------------|---------------------|---------------------|----------------------|
| <b>seq897</b>  | Firmicutes    | Clostridia   | 0                  | 0                   | 0                   | 0                    |
| <b>seq1077</b> | Firmicutes    | Clostridia   | 0                  | 0                   | 0                   | 0                    |
| <b>seq1081</b> | Firmicutes    | Clostridia   | 0                  | 0                   | 57                  | 6                    |
| <b>seq1137</b> | Firmicutes    | Clostridia   | 0                  | 0                   | 0                   | 0                    |
| <b>seq1195</b> | Firmicutes    | Clostridia   | 0                  | 0                   | 0                   | 0                    |
| <b>seq1291</b> | Firmicutes    | Clostridia   | 0                  | 0                   | 0                   | 0                    |
| <b>seq1313</b> | Firmicutes    | Clostridia   | 0                  | 13                  | 0                   | 0                    |
| <b>seq1356</b> | Firmicutes    | Clostridia   | 0                  | 0                   | 0                   | 0                    |
| <b>seq1455</b> | Firmicutes    | Clostridia   | 0                  | 0                   | 0                   | 0                    |
| <b>seq1463</b> | Firmicutes    | Clostridia   | 0                  | 0                   | 0                   | 0                    |
| <b>seq1501</b> | Firmicutes    | Clostridia   | 0                  | 0                   | 0                   | 0                    |
| <b>seq1595</b> | Firmicutes    | Clostridia   | 0                  | 0                   | 0                   | 0                    |
| <b>seq1624</b> | Firmicutes    | Clostridia   | 0                  | 0                   | 0                   | 0                    |
| <b>seq2</b>    | Firmicutes    | Clostridia   | 1217               | 5466                | 10492               | 16770                |
| <b>seq26</b>   | Firmicutes    | Clostridia   | 142                | 0                   | 0                   | 0                    |
| <b>seq98</b>   | Firmicutes    | Clostridia   | 203                | 124                 | 1954                | 596                  |
| <b>seq208</b>  | Firmicutes    | Clostridia   | 0                  | 0                   | 0                   | 0                    |
| <b>seq219</b>  | Firmicutes    | Clostridia   | 0                  | 0                   | 0                   | 0                    |
| <b>seq310</b>  | Firmicutes    | Clostridia   | 0                  | 0                   | 0                   | 0                    |
| <b>seq320</b>  | Firmicutes    | Clostridia   | 64                 | 156                 | 0                   | 0                    |
| <b>seq349</b>  | Firmicutes    | Clostridia   | 0                  | 0                   | 0                   | 0                    |
| <b>seq373</b>  | Firmicutes    | Clostridia   | 0                  | 0                   | 0                   | 0                    |
| <b>seq394</b>  | Firmicutes    | Clostridia   | 0                  | 0                   | 0                   | 0                    |
| <b>seq402</b>  | Firmicutes    | Clostridia   | 0                  | 0                   | 0                   | 0                    |
| <b>seq448</b>  | Firmicutes    | Clostridia   | 0                  | 0                   | 0                   | 0                    |
| <b>seq591</b>  | Firmicutes    | Clostridia   | 0                  | 0                   | 0                   | 0                    |
| <b>seq663</b>  | Firmicutes    | Clostridia   | 0                  | 0                   | 0                   | 0                    |
| <b>seq895</b>  | Firmicutes    | Clostridia   | 0                  | 0                   | 0                   | 0                    |
| <b>seq927</b>  | Firmicutes    | Clostridia   | 0                  | 0                   | 0                   | 0                    |
| <b>seq1426</b> | Firmicutes    | Clostridia   | 0                  | 0                   | 0                   | 38                   |
| <b>seq21</b>   | Firmicutes    | Clostridia   | 490                | 590                 | 1533                | 2543                 |
| <b>seq58</b>   | Firmicutes    | Clostridia   | 145                | 193                 | 332                 | 1040                 |



Sequence Count Table

|                | <b>Phylum</b> | <b>Class</b> | <b>Subject19WK0</b> | <b>Subject19WK12</b> | <b>Subject20WK0</b> | <b>Subject20WK12</b> |
|----------------|---------------|--------------|---------------------|----------------------|---------------------|----------------------|
| <b>seq897</b>  | Firmicutes    | Clostridia   | 0                   | 0                    | 0                   | 0                    |
| <b>seq1077</b> | Firmicutes    | Clostridia   | 0                   | 0                    | 0                   | 0                    |
| <b>seq1081</b> | Firmicutes    | Clostridia   | 0                   | 0                    | 0                   | 0                    |
| <b>seq1137</b> | Firmicutes    | Clostridia   | 0                   | 0                    | 0                   | 0                    |
| <b>seq1195</b> | Firmicutes    | Clostridia   | 0                   | 0                    | 0                   | 0                    |
| <b>seq1291</b> | Firmicutes    | Clostridia   | 0                   | 0                    | 0                   | 0                    |
| <b>seq1313</b> | Firmicutes    | Clostridia   | 0                   | 0                    | 0                   | 0                    |
| <b>seq1356</b> | Firmicutes    | Clostridia   | 22                  | 25                   | 0                   | 0                    |
| <b>seq1455</b> | Firmicutes    | Clostridia   | 0                   | 0                    | 0                   | 0                    |
| <b>seq1463</b> | Firmicutes    | Clostridia   | 0                   | 0                    | 0                   | 0                    |
| <b>seq1501</b> | Firmicutes    | Clostridia   | 0                   | 0                    | 0                   | 0                    |
| <b>seq1595</b> | Firmicutes    | Clostridia   | 0                   | 0                    | 0                   | 0                    |
| <b>seq1624</b> | Firmicutes    | Clostridia   | 0                   | 0                    | 0                   | 0                    |
| <b>seq2</b>    | Firmicutes    | Clostridia   | 13349               | 6313                 | 487                 | 916                  |
| <b>seq26</b>   | Firmicutes    | Clostridia   | 239                 | 486                  | 971                 | 2109                 |
| <b>seq98</b>   | Firmicutes    | Clostridia   | 1606                | 1886                 | 52                  | 51                   |
| <b>seq208</b>  | Firmicutes    | Clostridia   | 3217                | 1561                 | 0                   | 0                    |
| <b>seq219</b>  | Firmicutes    | Clostridia   | 0                   | 0                    | 0                   | 0                    |
| <b>seq310</b>  | Firmicutes    | Clostridia   | 0                   | 0                    | 0                   | 0                    |
| <b>seq320</b>  | Firmicutes    | Clostridia   | 0                   | 0                    | 18                  | 20                   |
| <b>seq349</b>  | Firmicutes    | Clostridia   | 0                   | 0                    | 0                   | 0                    |
| <b>seq373</b>  | Firmicutes    | Clostridia   | 0                   | 0                    | 0                   | 0                    |
| <b>seq394</b>  | Firmicutes    | Clostridia   | 0                   | 0                    | 0                   | 0                    |
| <b>seq402</b>  | Firmicutes    | Clostridia   | 0                   | 0                    | 0                   | 0                    |
| <b>seq448</b>  | Firmicutes    | Clostridia   | 0                   | 0                    | 0                   | 0                    |
| <b>seq591</b>  | Firmicutes    | Clostridia   | 0                   | 0                    | 0                   | 0                    |
| <b>seq663</b>  | Firmicutes    | Clostridia   | 0                   | 0                    | 0                   | 0                    |
| <b>seq895</b>  | Firmicutes    | Clostridia   | 0                   | 0                    | 0                   | 0                    |
| <b>seq927</b>  | Firmicutes    | Clostridia   | 0                   | 0                    | 0                   | 0                    |
| <b>seq1426</b> | Firmicutes    | Clostridia   | 0                   | 0                    | 0                   | 0                    |
| <b>seq21</b>   | Firmicutes    | Clostridia   | 2218                | 915                  | 188                 | 287                  |
| <b>seq58</b>   | Firmicutes    | Clostridia   | 624                 | 300                  | 195                 | 94                   |

Sequence Count Table

|                | <b>Phylum</b> | <b>Class</b> | <b>Subject7WK0</b> | <b>Subject7WK12</b> | <b>Subject21WK0</b> | <b>Subject21WK12</b> |
|----------------|---------------|--------------|--------------------|---------------------|---------------------|----------------------|
| <b>seq897</b>  | Firmicutes    | Clostridia   | 0                  | 0                   | 0                   | 0                    |
| <b>seq1077</b> | Firmicutes    | Clostridia   | 0                  | 0                   | 0                   | 0                    |
| <b>seq1081</b> | Firmicutes    | Clostridia   | 15                 | 0                   | 0                   | 0                    |
| <b>seq1137</b> | Firmicutes    | Clostridia   | 0                  | 0                   | 0                   | 0                    |
| <b>seq1195</b> | Firmicutes    | Clostridia   | 0                  | 0                   | 0                   | 0                    |
| <b>seq1291</b> | Firmicutes    | Clostridia   | 0                  | 0                   | 0                   | 0                    |
| <b>seq1313</b> | Firmicutes    | Clostridia   | 0                  | 0                   | 0                   | 0                    |
| <b>seq1356</b> | Firmicutes    | Clostridia   | 0                  | 0                   | 0                   | 0                    |
| <b>seq1455</b> | Firmicutes    | Clostridia   | 0                  | 0                   | 0                   | 0                    |
| <b>seq1463</b> | Firmicutes    | Clostridia   | 0                  | 0                   | 0                   | 0                    |
| <b>seq1501</b> | Firmicutes    | Clostridia   | 0                  | 0                   | 0                   | 0                    |
| <b>seq1595</b> | Firmicutes    | Clostridia   | 0                  | 0                   | 0                   | 0                    |
| <b>seq1624</b> | Firmicutes    | Clostridia   | 0                  | 0                   | 0                   | 0                    |
| <b>seq2</b>    | Firmicutes    | Clostridia   | 12831              | 4236                | 20902               | 7560                 |
| <b>seq26</b>   | Firmicutes    | Clostridia   | 0                  | 7133                | 1243                | 0                    |
| <b>seq98</b>   | Firmicutes    | Clostridia   | 0                  | 0                   | 0                   | 0                    |
| <b>seq208</b>  | Firmicutes    | Clostridia   | 0                  | 0                   | 0                   | 0                    |
| <b>seq219</b>  | Firmicutes    | Clostridia   | 0                  | 0                   | 0                   | 0                    |
| <b>seq310</b>  | Firmicutes    | Clostridia   | 0                  | 0                   | 0                   | 0                    |
| <b>seq320</b>  | Firmicutes    | Clostridia   | 0                  | 0                   | 0                   | 0                    |
| <b>seq349</b>  | Firmicutes    | Clostridia   | 0                  | 0                   | 0                   | 0                    |
| <b>seq373</b>  | Firmicutes    | Clostridia   | 0                  | 0                   | 0                   | 0                    |
| <b>seq394</b>  | Firmicutes    | Clostridia   | 0                  | 0                   | 0                   | 0                    |
| <b>seq402</b>  | Firmicutes    | Clostridia   | 0                  | 0                   | 0                   | 0                    |
| <b>seq448</b>  | Firmicutes    | Clostridia   | 0                  | 0                   | 0                   | 0                    |
| <b>seq591</b>  | Firmicutes    | Clostridia   | 0                  | 0                   | 0                   | 0                    |
| <b>seq663</b>  | Firmicutes    | Clostridia   | 0                  | 0                   | 0                   | 0                    |
| <b>seq895</b>  | Firmicutes    | Clostridia   | 0                  | 0                   | 0                   | 0                    |
| <b>seq927</b>  | Firmicutes    | Clostridia   | 0                  | 0                   | 0                   | 0                    |
| <b>seq1426</b> | Firmicutes    | Clostridia   | 0                  | 0                   | 0                   | 0                    |
| <b>seq21</b>   | Firmicutes    | Clostridia   | 1550               | 3306                | 647                 | 1030                 |
| <b>seq58</b>   | Firmicutes    | Clostridia   | 775                | 546                 | 1249                | 2943                 |

Sequence Count Table

|                | <b>Phylum</b> | <b>Class</b> | <b>Subject8WK0</b> | <b>Subject8WK12</b> | <b>Subject9WK0</b> | <b>Subject9WK12</b> |
|----------------|---------------|--------------|--------------------|---------------------|--------------------|---------------------|
| <b>seq897</b>  | Firmicutes    | Clostridia   | 0                  | 0                   | 0                  | 0                   |
| <b>seq1077</b> | Firmicutes    | Clostridia   | 0                  | 0                   | 0                  | 0                   |
| <b>seq1081</b> | Firmicutes    | Clostridia   | 0                  | 0                   | 0                  | 0                   |
| <b>seq1137</b> | Firmicutes    | Clostridia   | 0                  | 0                   | 0                  | 0                   |
| <b>seq1195</b> | Firmicutes    | Clostridia   | 0                  | 0                   | 37                 | 0                   |
| <b>seq1291</b> | Firmicutes    | Clostridia   | 0                  | 0                   | 0                  | 0                   |
| <b>seq1313</b> | Firmicutes    | Clostridia   | 0                  | 0                   | 0                  | 0                   |
| <b>seq1356</b> | Firmicutes    | Clostridia   | 0                  | 0                   | 0                  | 0                   |
| <b>seq1455</b> | Firmicutes    | Clostridia   | 0                  | 0                   | 0                  | 0                   |
| <b>seq1463</b> | Firmicutes    | Clostridia   | 0                  | 0                   | 0                  | 0                   |
| <b>seq1501</b> | Firmicutes    | Clostridia   | 0                  | 0                   | 0                  | 0                   |
| <b>seq1595</b> | Firmicutes    | Clostridia   | 0                  | 0                   | 20                 | 0                   |
| <b>seq1624</b> | Firmicutes    | Clostridia   | 0                  | 0                   | 0                  | 0                   |
| <b>seq2</b>    | Firmicutes    | Clostridia   | 7694               | 8052                | 0                  | 185                 |
| <b>seq26</b>   | Firmicutes    | Clostridia   | 0                  | 0                   | 526                | 0                   |
| <b>seq98</b>   | Firmicutes    | Clostridia   | 523                | 672                 | 0                  | 0                   |
| <b>seq208</b>  | Firmicutes    | Clostridia   | 0                  | 0                   | 0                  | 0                   |
| <b>seq219</b>  | Firmicutes    | Clostridia   | 0                  | 0                   | 0                  | 0                   |
| <b>seq310</b>  | Firmicutes    | Clostridia   | 0                  | 0                   | 0                  | 0                   |
| <b>seq320</b>  | Firmicutes    | Clostridia   | 0                  | 0                   | 0                  | 0                   |
| <b>seq349</b>  | Firmicutes    | Clostridia   | 0                  | 0                   | 0                  | 0                   |
| <b>seq373</b>  | Firmicutes    | Clostridia   | 0                  | 0                   | 0                  | 0                   |
| <b>seq394</b>  | Firmicutes    | Clostridia   | 0                  | 0                   | 0                  | 0                   |
| <b>seq402</b>  | Firmicutes    | Clostridia   | 0                  | 0                   | 0                  | 0                   |
| <b>seq448</b>  | Firmicutes    | Clostridia   | 0                  | 0                   | 0                  | 0                   |
| <b>seq591</b>  | Firmicutes    | Clostridia   | 0                  | 0                   | 0                  | 0                   |
| <b>seq663</b>  | Firmicutes    | Clostridia   | 0                  | 0                   | 0                  | 0                   |
| <b>seq895</b>  | Firmicutes    | Clostridia   | 0                  | 0                   | 0                  | 0                   |
| <b>seq927</b>  | Firmicutes    | Clostridia   | 0                  | 0                   | 0                  | 0                   |
| <b>seq1426</b> | Firmicutes    | Clostridia   | 0                  | 0                   | 0                  | 0                   |
| <b>seq21</b>   | Firmicutes    | Clostridia   | 2305               | 1144                | 520                | 1058                |
| <b>seq58</b>   | Firmicutes    | Clostridia   | 408                | 281                 | 542                | 1009                |

Sequence Count Table

|                | <b>Phylum</b> | <b>Class</b> | <b>Subject10WK0</b> | <b>Subject10WK12</b> | <b>Subject22WK0</b> | <b>Subject22WK12</b> |
|----------------|---------------|--------------|---------------------|----------------------|---------------------|----------------------|
| <b>seq897</b>  | Firmicutes    | Clostridia   | 0                   | 0                    | 0                   | 0                    |
| <b>seq1077</b> | Firmicutes    | Clostridia   | 0                   | 0                    | 0                   | 0                    |
| <b>seq1081</b> | Firmicutes    | Clostridia   | 0                   | 0                    | 0                   | 0                    |
| <b>seq1137</b> | Firmicutes    | Clostridia   | 27                  | 27                   | 0                   | 0                    |
| <b>seq1195</b> | Firmicutes    | Clostridia   | 0                   | 0                    | 0                   | 0                    |
| <b>seq1291</b> | Firmicutes    | Clostridia   | 0                   | 0                    | 0                   | 0                    |
| <b>seq1313</b> | Firmicutes    | Clostridia   | 0                   | 0                    | 0                   | 0                    |
| <b>seq1356</b> | Firmicutes    | Clostridia   | 0                   | 0                    | 0                   | 0                    |
| <b>seq1455</b> | Firmicutes    | Clostridia   | 18                  | 0                    | 0                   | 0                    |
| <b>seq1463</b> | Firmicutes    | Clostridia   | 0                   | 0                    | 0                   | 0                    |
| <b>seq1501</b> | Firmicutes    | Clostridia   | 28                  | 0                    | 0                   | 0                    |
| <b>seq1595</b> | Firmicutes    | Clostridia   | 0                   | 0                    | 0                   | 0                    |
| <b>seq1624</b> | Firmicutes    | Clostridia   | 0                   | 0                    | 0                   | 0                    |
| <b>seq2</b>    | Firmicutes    | Clostridia   | 18129               | 13486                | 1431                | 1073                 |
| <b>seq26</b>   | Firmicutes    | Clostridia   | 280                 | 501                  | 1078                | 2084                 |
| <b>seq98</b>   | Firmicutes    | Clostridia   | 0                   | 0                    | 86                  | 59                   |
| <b>seq208</b>  | Firmicutes    | Clostridia   | 0                   | 0                    | 0                   | 0                    |
| <b>seq219</b>  | Firmicutes    | Clostridia   | 0                   | 0                    | 0                   | 0                    |
| <b>seq310</b>  | Firmicutes    | Clostridia   | 0                   | 0                    | 0                   | 0                    |
| <b>seq320</b>  | Firmicutes    | Clostridia   | 0                   | 0                    | 0                   | 0                    |
| <b>seq349</b>  | Firmicutes    | Clostridia   | 0                   | 0                    | 0                   | 0                    |
| <b>seq373</b>  | Firmicutes    | Clostridia   | 0                   | 0                    | 0                   | 0                    |
| <b>seq394</b>  | Firmicutes    | Clostridia   | 0                   | 0                    | 0                   | 0                    |
| <b>seq402</b>  | Firmicutes    | Clostridia   | 746                 | 491                  | 0                   | 0                    |
| <b>seq448</b>  | Firmicutes    | Clostridia   | 0                   | 0                    | 0                   | 0                    |
| <b>seq591</b>  | Firmicutes    | Clostridia   | 0                   | 0                    | 0                   | 0                    |
| <b>seq663</b>  | Firmicutes    | Clostridia   | 0                   | 0                    | 0                   | 0                    |
| <b>seq895</b>  | Firmicutes    | Clostridia   | 0                   | 0                    | 0                   | 0                    |
| <b>seq927</b>  | Firmicutes    | Clostridia   | 0                   | 0                    | 0                   | 0                    |
| <b>seq1426</b> | Firmicutes    | Clostridia   | 0                   | 0                    | 0                   | 0                    |
| <b>seq21</b>   | Firmicutes    | Clostridia   | 2166                | 1751                 | 419                 | 370                  |
| <b>seq58</b>   | Firmicutes    | Clostridia   | 0                   | 0                    | 252                 | 186                  |

Sequence Count Table

|                | <b>Phylum</b> | <b>Class</b> | <b>Subject23WK0</b> | <b>Subject23WK12</b> | <b>Subject24WK0</b> | <b>Subject24WK12</b> |
|----------------|---------------|--------------|---------------------|----------------------|---------------------|----------------------|
| <b>seq897</b>  | Firmicutes    | Clostridia   | 0                   | 0                    | 0                   | 0                    |
| <b>seq1077</b> | Firmicutes    | Clostridia   | 0                   | 0                    | 0                   | 0                    |
| <b>seq1081</b> | Firmicutes    | Clostridia   | 0                   | 0                    | 0                   | 0                    |
| <b>seq1137</b> | Firmicutes    | Clostridia   | 0                   | 0                    | 0                   | 0                    |
| <b>seq1195</b> | Firmicutes    | Clostridia   | 0                   | 0                    | 0                   | 0                    |
| <b>seq1291</b> | Firmicutes    | Clostridia   | 0                   | 0                    | 0                   | 0                    |
| <b>seq1313</b> | Firmicutes    | Clostridia   | 0                   | 20                   | 0                   | 0                    |
| <b>seq1356</b> | Firmicutes    | Clostridia   | 0                   | 0                    | 0                   | 0                    |
| <b>seq1455</b> | Firmicutes    | Clostridia   | 0                   | 0                    | 0                   | 0                    |
| <b>seq1463</b> | Firmicutes    | Clostridia   | 0                   | 0                    | 0                   | 0                    |
| <b>seq1501</b> | Firmicutes    | Clostridia   | 0                   | 0                    | 0                   | 0                    |
| <b>seq1595</b> | Firmicutes    | Clostridia   | 0                   | 0                    | 0                   | 0                    |
| <b>seq1624</b> | Firmicutes    | Clostridia   | 0                   | 0                    | 0                   | 0                    |
| <b>seq2</b>    | Firmicutes    | Clostridia   | 1096                | 726                  | 8300                | 9926                 |
| <b>seq26</b>   | Firmicutes    | Clostridia   | 2600                | 4010                 | 4920                | 2856                 |
| <b>seq98</b>   | Firmicutes    | Clostridia   | 106                 | 54                   | 262                 | 176                  |
| <b>seq208</b>  | Firmicutes    | Clostridia   | 0                   | 0                    | 0                   | 0                    |
| <b>seq219</b>  | Firmicutes    | Clostridia   | 0                   | 0                    | 0                   | 0                    |
| <b>seq310</b>  | Firmicutes    | Clostridia   | 0                   | 0                    | 0                   | 0                    |
| <b>seq320</b>  | Firmicutes    | Clostridia   | 20                  | 20                   | 0                   | 0                    |
| <b>seq349</b>  | Firmicutes    | Clostridia   | 0                   | 0                    | 0                   | 0                    |
| <b>seq373</b>  | Firmicutes    | Clostridia   | 0                   | 0                    | 0                   | 0                    |
| <b>seq394</b>  | Firmicutes    | Clostridia   | 0                   | 0                    | 0                   | 0                    |
| <b>seq402</b>  | Firmicutes    | Clostridia   | 0                   | 0                    | 0                   | 0                    |
| <b>seq448</b>  | Firmicutes    | Clostridia   | 0                   | 0                    | 0                   | 0                    |
| <b>seq591</b>  | Firmicutes    | Clostridia   | 348                 | 206                  | 0                   | 0                    |
| <b>seq663</b>  | Firmicutes    | Clostridia   | 0                   | 0                    | 0                   | 0                    |
| <b>seq895</b>  | Firmicutes    | Clostridia   | 0                   | 0                    | 0                   | 0                    |
| <b>seq927</b>  | Firmicutes    | Clostridia   | 0                   | 0                    | 0                   | 0                    |
| <b>seq1426</b> | Firmicutes    | Clostridia   | 0                   | 0                    | 0                   | 0                    |
| <b>seq21</b>   | Firmicutes    | Clostridia   | 192                 | 353                  | 1027                | 1994                 |
| <b>seq58</b>   | Firmicutes    | Clostridia   | 0                   | 139                  | 328                 | 539                  |

Sequence Count Table

|                | <b>Phylum</b> | <b>Class</b> | <b>Subject11WK0</b> | <b>Subject11WK12</b> | <b>Subject12WK0</b> | <b>Subject12WK12</b> |
|----------------|---------------|--------------|---------------------|----------------------|---------------------|----------------------|
| <b>seq897</b>  | Firmicutes    | Clostridia   | 0                   | 0                    | 0                   | 0                    |
| <b>seq1077</b> | Firmicutes    | Clostridia   | 0                   | 0                    | 0                   | 0                    |
| <b>seq1081</b> | Firmicutes    | Clostridia   | 0                   | 0                    | 0                   | 0                    |
| <b>seq1137</b> | Firmicutes    | Clostridia   | 0                   | 0                    | 0                   | 0                    |
| <b>seq1195</b> | Firmicutes    | Clostridia   | 0                   | 0                    | 0                   | 0                    |
| <b>seq1291</b> | Firmicutes    | Clostridia   | 59                  | 0                    | 0                   | 0                    |
| <b>seq1313</b> | Firmicutes    | Clostridia   | 0                   | 0                    | 0                   | 0                    |
| <b>seq1356</b> | Firmicutes    | Clostridia   | 0                   | 0                    | 0                   | 0                    |
| <b>seq1455</b> | Firmicutes    | Clostridia   | 0                   | 0                    | 0                   | 0                    |
| <b>seq1463</b> | Firmicutes    | Clostridia   | 0                   | 0                    | 0                   | 0                    |
| <b>seq1501</b> | Firmicutes    | Clostridia   | 0                   | 0                    | 0                   | 0                    |
| <b>seq1595</b> | Firmicutes    | Clostridia   | 0                   | 0                    | 0                   | 0                    |
| <b>seq1624</b> | Firmicutes    | Clostridia   | 0                   | 0                    | 0                   | 0                    |
| <b>seq2</b>    | Firmicutes    | Clostridia   | 10358               | 6601                 | 1828                | 2457                 |
| <b>seq26</b>   | Firmicutes    | Clostridia   | 0                   | 0                    | 808                 | 2847                 |
| <b>seq98</b>   | Firmicutes    | Clostridia   | 0                   | 0                    | 231                 | 336                  |
| <b>seq208</b>  | Firmicutes    | Clostridia   | 0                   | 0                    | 0                   | 0                    |
| <b>seq219</b>  | Firmicutes    | Clostridia   | 2470                | 1755                 | 0                   | 0                    |
| <b>seq310</b>  | Firmicutes    | Clostridia   | 0                   | 0                    | 0                   | 0                    |
| <b>seq320</b>  | Firmicutes    | Clostridia   | 0                   | 0                    | 0                   | 0                    |
| <b>seq349</b>  | Firmicutes    | Clostridia   | 0                   | 0                    | 0                   | 0                    |
| <b>seq373</b>  | Firmicutes    | Clostridia   | 0                   | 0                    | 0                   | 0                    |
| <b>seq394</b>  | Firmicutes    | Clostridia   | 0                   | 0                    | 0                   | 0                    |
| <b>seq402</b>  | Firmicutes    | Clostridia   | 0                   | 0                    | 0                   | 0                    |
| <b>seq448</b>  | Firmicutes    | Clostridia   | 0                   | 0                    | 0                   | 0                    |
| <b>seq591</b>  | Firmicutes    | Clostridia   | 0                   | 0                    | 0                   | 0                    |
| <b>seq663</b>  | Firmicutes    | Clostridia   | 0                   | 0                    | 0                   | 0                    |
| <b>seq895</b>  | Firmicutes    | Clostridia   | 0                   | 0                    | 0                   | 0                    |
| <b>seq927</b>  | Firmicutes    | Clostridia   | 0                   | 0                    | 0                   | 0                    |
| <b>seq1426</b> | Firmicutes    | Clostridia   | 0                   | 0                    | 0                   | 0                    |
| <b>seq21</b>   | Firmicutes    | Clostridia   | 2776                | 4575                 | 748                 | 1584                 |
| <b>seq58</b>   | Firmicutes    | Clostridia   | 606                 | 1114                 | 0                   | 0                    |

Sequence Count Table

|                | <b>Phylum</b> | <b>Class</b> | <b>Subject25WK0</b> | <b>Subject25WK12</b> | <b>Subject38WK0</b> | <b>Subject38WK12</b> |
|----------------|---------------|--------------|---------------------|----------------------|---------------------|----------------------|
| <b>seq897</b>  | Firmicutes    | Clostridia   | 0                   | 0                    | 0                   | 0                    |
| <b>seq1077</b> | Firmicutes    | Clostridia   | 0                   | 0                    | 0                   | 0                    |
| <b>seq1081</b> | Firmicutes    | Clostridia   | 0                   | 0                    | 0                   | 0                    |
| <b>seq1137</b> | Firmicutes    | Clostridia   | 0                   | 0                    | 0                   | 0                    |
| <b>seq1195</b> | Firmicutes    | Clostridia   | 29                  | 0                    | 0                   | 0                    |
| <b>seq1291</b> | Firmicutes    | Clostridia   | 0                   | 0                    | 0                   | 0                    |
| <b>seq1313</b> | Firmicutes    | Clostridia   | 0                   | 0                    | 0                   | 0                    |
| <b>seq1356</b> | Firmicutes    | Clostridia   | 0                   | 0                    | 0                   | 0                    |
| <b>seq1455</b> | Firmicutes    | Clostridia   | 0                   | 0                    | 0                   | 0                    |
| <b>seq1463</b> | Firmicutes    | Clostridia   | 0                   | 0                    | 0                   | 0                    |
| <b>seq1501</b> | Firmicutes    | Clostridia   | 0                   | 0                    | 0                   | 0                    |
| <b>seq1595</b> | Firmicutes    | Clostridia   | 0                   | 0                    | 0                   | 0                    |
| <b>seq1624</b> | Firmicutes    | Clostridia   | 18                  | 0                    | 0                   | 0                    |
| <b>seq2</b>    | Firmicutes    | Clostridia   | 5320                | 91                   | 134                 | 0                    |
| <b>seq26</b>   | Firmicutes    | Clostridia   | 1462                | 0                    | 0                   | 0                    |
| <b>seq98</b>   | Firmicutes    | Clostridia   | 125                 | 0                    | 0                   | 0                    |
| <b>seq208</b>  | Firmicutes    | Clostridia   | 0                   | 0                    | 0                   | 0                    |
| <b>seq219</b>  | Firmicutes    | Clostridia   | 0                   | 0                    | 0                   | 0                    |
| <b>seq310</b>  | Firmicutes    | Clostridia   | 0                   | 0                    | 0                   | 0                    |
| <b>seq320</b>  | Firmicutes    | Clostridia   | 0                   | 0                    | 0                   | 0                    |
| <b>seq349</b>  | Firmicutes    | Clostridia   | 0                   | 0                    | 0                   | 0                    |
| <b>seq373</b>  | Firmicutes    | Clostridia   | 0                   | 0                    | 0                   | 0                    |
| <b>seq394</b>  | Firmicutes    | Clostridia   | 0                   | 0                    | 0                   | 0                    |
| <b>seq402</b>  | Firmicutes    | Clostridia   | 0                   | 0                    | 0                   | 0                    |
| <b>seq448</b>  | Firmicutes    | Clostridia   | 0                   | 0                    | 0                   | 0                    |
| <b>seq591</b>  | Firmicutes    | Clostridia   | 0                   | 0                    | 0                   | 0                    |
| <b>seq663</b>  | Firmicutes    | Clostridia   | 0                   | 0                    | 0                   | 0                    |
| <b>seq895</b>  | Firmicutes    | Clostridia   | 0                   | 0                    | 0                   | 0                    |
| <b>seq927</b>  | Firmicutes    | Clostridia   | 0                   | 0                    | 0                   | 0                    |
| <b>seq1426</b> | Firmicutes    | Clostridia   | 0                   | 0                    | 0                   | 0                    |
| <b>seq21</b>   | Firmicutes    | Clostridia   | 972                 | 3937                 | 0                   | 0                    |
| <b>seq58</b>   | Firmicutes    | Clostridia   | 430                 | 1705                 | 0                   | 0                    |

Sequence Count Table

|                | <b>Phylum</b> | <b>Class</b> | <b>Subject31WK0</b> | <b>Subject31WK12</b> | <b>Subject32WK0</b> | <b>Subject32WK12</b> |
|----------------|---------------|--------------|---------------------|----------------------|---------------------|----------------------|
| <b>seq897</b>  | Firmicutes    | Clostridia   | 0                   | 0                    | 0                   | 0                    |
| <b>seq1077</b> | Firmicutes    | Clostridia   | 0                   | 0                    | 0                   | 0                    |
| <b>seq1081</b> | Firmicutes    | Clostridia   | 0                   | 0                    | 0                   | 0                    |
| <b>seq1137</b> | Firmicutes    | Clostridia   | 0                   | 0                    | 0                   | 0                    |
| <b>seq1195</b> | Firmicutes    | Clostridia   | 0                   | 0                    | 0                   | 0                    |
| <b>seq1291</b> | Firmicutes    | Clostridia   | 0                   | 0                    | 0                   | 0                    |
| <b>seq1313</b> | Firmicutes    | Clostridia   | 0                   | 0                    | 0                   | 0                    |
| <b>seq1356</b> | Firmicutes    | Clostridia   | 0                   | 0                    | 0                   | 0                    |
| <b>seq1455</b> | Firmicutes    | Clostridia   | 0                   | 0                    | 0                   | 0                    |
| <b>seq1463</b> | Firmicutes    | Clostridia   | 0                   | 0                    | 0                   | 0                    |
| <b>seq1501</b> | Firmicutes    | Clostridia   | 0                   | 0                    | 0                   | 0                    |
| <b>seq1595</b> | Firmicutes    | Clostridia   | 0                   | 0                    | 0                   | 0                    |
| <b>seq1624</b> | Firmicutes    | Clostridia   | 0                   | 0                    | 0                   | 0                    |
| <b>seq2</b>    | Firmicutes    | Clostridia   | 166                 | 69                   | 7177                | 88                   |
| <b>seq26</b>   | Firmicutes    | Clostridia   | 0                   | 0                    | 0                   | 0                    |
| <b>seq98</b>   | Firmicutes    | Clostridia   | 0                   | 0                    | 0                   | 0                    |
| <b>seq208</b>  | Firmicutes    | Clostridia   | 0                   | 0                    | 0                   | 0                    |
| <b>seq219</b>  | Firmicutes    | Clostridia   | 0                   | 0                    | 0                   | 0                    |
| <b>seq310</b>  | Firmicutes    | Clostridia   | 0                   | 0                    | 0                   | 0                    |
| <b>seq320</b>  | Firmicutes    | Clostridia   | 0                   | 0                    | 0                   | 0                    |
| <b>seq349</b>  | Firmicutes    | Clostridia   | 0                   | 0                    | 0                   | 0                    |
| <b>seq373</b>  | Firmicutes    | Clostridia   | 0                   | 0                    | 0                   | 0                    |
| <b>seq394</b>  | Firmicutes    | Clostridia   | 0                   | 0                    | 0                   | 0                    |
| <b>seq402</b>  | Firmicutes    | Clostridia   | 0                   | 0                    | 0                   | 0                    |
| <b>seq448</b>  | Firmicutes    | Clostridia   | 0                   | 0                    | 0                   | 0                    |
| <b>seq591</b>  | Firmicutes    | Clostridia   | 0                   | 0                    | 0                   | 0                    |
| <b>seq663</b>  | Firmicutes    | Clostridia   | 0                   | 0                    | 438                 | 0                    |
| <b>seq895</b>  | Firmicutes    | Clostridia   | 0                   | 0                    | 0                   | 0                    |
| <b>seq927</b>  | Firmicutes    | Clostridia   | 0                   | 0                    | 0                   | 0                    |
| <b>seq1426</b> | Firmicutes    | Clostridia   | 0                   | 0                    | 0                   | 0                    |
| <b>seq21</b>   | Firmicutes    | Clostridia   | 0                   | 0                    | 600                 | 30                   |
| <b>seq58</b>   | Firmicutes    | Clostridia   | 0                   | 0                    | 521                 | 0                    |



Sequence Count Table

|                | <b>Phylum</b> | <b>Class</b> | <b>Subject13WK0</b> | <b>Subject13WK12</b> | <b>Subject39WK0</b> | <b>Subject39WK12</b> |
|----------------|---------------|--------------|---------------------|----------------------|---------------------|----------------------|
| <b>seq897</b>  | Firmicutes    | Clostridia   | 33                  | 37                   | 0                   | 0                    |
| <b>seq1077</b> | Firmicutes    | Clostridia   | 0                   | 0                    | 0                   | 0                    |
| <b>seq1081</b> | Firmicutes    | Clostridia   | 0                   | 0                    | 0                   | 0                    |
| <b>seq1137</b> | Firmicutes    | Clostridia   | 0                   | 0                    | 0                   | 0                    |
| <b>seq1195</b> | Firmicutes    | Clostridia   | 0                   | 16                   | 0                   | 0                    |
| <b>seq1291</b> | Firmicutes    | Clostridia   | 0                   | 0                    | 0                   | 0                    |
| <b>seq1313</b> | Firmicutes    | Clostridia   | 0                   | 0                    | 0                   | 0                    |
| <b>seq1356</b> | Firmicutes    | Clostridia   | 0                   | 0                    | 0                   | 0                    |
| <b>seq1455</b> | Firmicutes    | Clostridia   | 0                   | 0                    | 0                   | 0                    |
| <b>seq1463</b> | Firmicutes    | Clostridia   | 0                   | 0                    | 0                   | 0                    |
| <b>seq1501</b> | Firmicutes    | Clostridia   | 0                   | 0                    | 0                   | 0                    |
| <b>seq1595</b> | Firmicutes    | Clostridia   | 0                   | 0                    | 0                   | 0                    |
| <b>seq1624</b> | Firmicutes    | Clostridia   | 0                   | 0                    | 0                   | 0                    |
| <b>seq2</b>    | Firmicutes    | Clostridia   | 6111                | 1602                 | 0                   | 8569                 |
| <b>seq26</b>   | Firmicutes    | Clostridia   | 0                   | 0                    | 0                   | 1810                 |
| <b>seq98</b>   | Firmicutes    | Clostridia   | 409                 | 188                  | 0                   | 328                  |
| <b>seq208</b>  | Firmicutes    | Clostridia   | 0                   | 0                    | 0                   | 0                    |
| <b>seq219</b>  | Firmicutes    | Clostridia   | 0                   | 0                    | 0                   | 0                    |
| <b>seq310</b>  | Firmicutes    | Clostridia   | 0                   | 0                    | 0                   | 0                    |
| <b>seq320</b>  | Firmicutes    | Clostridia   | 0                   | 0                    | 0                   | 25                   |
| <b>seq349</b>  | Firmicutes    | Clostridia   | 0                   | 0                    | 0                   | 0                    |
| <b>seq373</b>  | Firmicutes    | Clostridia   | 0                   | 0                    | 0                   | 0                    |
| <b>seq394</b>  | Firmicutes    | Clostridia   | 0                   | 0                    | 0                   | 0                    |
| <b>seq402</b>  | Firmicutes    | Clostridia   | 0                   | 0                    | 0                   | 0                    |
| <b>seq448</b>  | Firmicutes    | Clostridia   | 0                   | 0                    | 0                   | 0                    |
| <b>seq591</b>  | Firmicutes    | Clostridia   | 0                   | 0                    | 0                   | 0                    |
| <b>seq663</b>  | Firmicutes    | Clostridia   | 0                   | 0                    | 0                   | 0                    |
| <b>seq895</b>  | Firmicutes    | Clostridia   | 0                   | 0                    | 0                   | 0                    |
| <b>seq927</b>  | Firmicutes    | Clostridia   | 178                 | 0                    | 0                   | 0                    |
| <b>seq1426</b> | Firmicutes    | Clostridia   | 0                   | 0                    | 0                   | 0                    |
| <b>seq21</b>   | Firmicutes    | Clostridia   | 1164                | 1170                 | 0                   | 918                  |
| <b>seq58</b>   | Firmicutes    | Clostridia   | 229                 | 490                  | 0                   | 84                   |

Sequence Count Table

|                | <b>Phylum</b> | <b>Class</b> | <b>Subject26WK0</b> | <b>Subject26WK12</b> | <b>Subject14WK0</b> | <b>Subject14WK12</b> |
|----------------|---------------|--------------|---------------------|----------------------|---------------------|----------------------|
| <b>seq897</b>  | Firmicutes    | Clostridia   | 0                   | 0                    | 0                   | 38                   |
| <b>seq1077</b> | Firmicutes    | Clostridia   | 0                   | 0                    | 0                   | 0                    |
| <b>seq1081</b> | Firmicutes    | Clostridia   | 0                   | 24                   | 0                   | 0                    |
| <b>seq1137</b> | Firmicutes    | Clostridia   | 0                   | 0                    | 0                   | 0                    |
| <b>seq1195</b> | Firmicutes    | Clostridia   | 0                   | 0                    | 0                   | 0                    |
| <b>seq1291</b> | Firmicutes    | Clostridia   | 0                   | 0                    | 0                   | 0                    |
| <b>seq1313</b> | Firmicutes    | Clostridia   | 0                   | 0                    | 0                   | 0                    |
| <b>seq1356</b> | Firmicutes    | Clostridia   | 0                   | 0                    | 0                   | 0                    |
| <b>seq1455</b> | Firmicutes    | Clostridia   | 0                   | 0                    | 0                   | 0                    |
| <b>seq1463</b> | Firmicutes    | Clostridia   | 33                  | 0                    | 0                   | 0                    |
| <b>seq1501</b> | Firmicutes    | Clostridia   | 0                   | 0                    | 0                   | 0                    |
| <b>seq1595</b> | Firmicutes    | Clostridia   | 0                   | 0                    | 0                   | 0                    |
| <b>seq1624</b> | Firmicutes    | Clostridia   | 0                   | 0                    | 0                   | 0                    |
| <b>seq2</b>    | Firmicutes    | Clostridia   | 0                   | 0                    | 5745                | 6370                 |
| <b>seq26</b>   | Firmicutes    | Clostridia   | 1766                | 2501                 | 0                   | 0                    |
| <b>seq98</b>   | Firmicutes    | Clostridia   | 0                   | 0                    | 41                  | 60                   |
| <b>seq208</b>  | Firmicutes    | Clostridia   | 0                   | 0                    | 0                   | 0                    |
| <b>seq219</b>  | Firmicutes    | Clostridia   | 0                   | 0                    | 0                   | 0                    |
| <b>seq310</b>  | Firmicutes    | Clostridia   | 0                   | 0                    | 0                   | 0                    |
| <b>seq320</b>  | Firmicutes    | Clostridia   | 631                 | 900                  | 0                   | 0                    |
| <b>seq349</b>  | Firmicutes    | Clostridia   | 0                   | 0                    | 0                   | 0                    |
| <b>seq373</b>  | Firmicutes    | Clostridia   | 0                   | 0                    | 0                   | 0                    |
| <b>seq394</b>  | Firmicutes    | Clostridia   | 0                   | 0                    | 0                   | 0                    |
| <b>seq402</b>  | Firmicutes    | Clostridia   | 0                   | 0                    | 0                   | 0                    |
| <b>seq448</b>  | Firmicutes    | Clostridia   | 0                   | 0                    | 0                   | 0                    |
| <b>seq591</b>  | Firmicutes    | Clostridia   | 0                   | 0                    | 0                   | 0                    |
| <b>seq663</b>  | Firmicutes    | Clostridia   | 0                   | 0                    | 0                   | 0                    |
| <b>seq895</b>  | Firmicutes    | Clostridia   | 0                   | 0                    | 0                   | 0                    |
| <b>seq927</b>  | Firmicutes    | Clostridia   | 0                   | 0                    | 0                   | 0                    |
| <b>seq1426</b> | Firmicutes    | Clostridia   | 0                   | 0                    | 0                   | 0                    |
| <b>seq21</b>   | Firmicutes    | Clostridia   | 453                 | 633                  | 476                 | 3623                 |
| <b>seq58</b>   | Firmicutes    | Clostridia   | 550                 | 338                  | 0                   | 0                    |

Sequence Count Table

|                | <b>Phylum</b> | <b>Class</b> | <b>Subject27WK0</b> | <b>Subject27WK12</b> | <b>Subject15WK0</b> | <b>Subject15WK12</b> |
|----------------|---------------|--------------|---------------------|----------------------|---------------------|----------------------|
| <b>seq897</b>  | Firmicutes    | Clostridia   | 0                   | 0                    | 0                   | 0                    |
| <b>seq1077</b> | Firmicutes    | Clostridia   | 0                   | 0                    | 0                   | 0                    |
| <b>seq1081</b> | Firmicutes    | Clostridia   | 0                   | 0                    | 0                   | 0                    |
| <b>seq1137</b> | Firmicutes    | Clostridia   | 0                   | 0                    | 0                   | 0                    |
| <b>seq1195</b> | Firmicutes    | Clostridia   | 0                   | 0                    | 0                   | 0                    |
| <b>seq1291</b> | Firmicutes    | Clostridia   | 0                   | 0                    | 0                   | 0                    |
| <b>seq1313</b> | Firmicutes    | Clostridia   | 0                   | 0                    | 0                   | 0                    |
| <b>seq1356</b> | Firmicutes    | Clostridia   | 0                   | 0                    | 0                   | 0                    |
| <b>seq1455</b> | Firmicutes    | Clostridia   | 0                   | 0                    | 0                   | 0                    |
| <b>seq1463</b> | Firmicutes    | Clostridia   | 0                   | 0                    | 0                   | 0                    |
| <b>seq1501</b> | Firmicutes    | Clostridia   | 0                   | 0                    | 0                   | 0                    |
| <b>seq1595</b> | Firmicutes    | Clostridia   | 0                   | 0                    | 0                   | 0                    |
| <b>seq1624</b> | Firmicutes    | Clostridia   | 0                   | 0                    | 0                   | 0                    |
| <b>seq2</b>    | Firmicutes    | Clostridia   | 3627                | 1539                 | 9913                | 2956                 |
| <b>seq26</b>   | Firmicutes    | Clostridia   | 3018                | 3175                 | 2248                | 110                  |
| <b>seq98</b>   | Firmicutes    | Clostridia   | 93                  | 83                   | 181                 | 1008                 |
| <b>seq208</b>  | Firmicutes    | Clostridia   | 0                   | 0                    | 0                   | 0                    |
| <b>seq219</b>  | Firmicutes    | Clostridia   | 0                   | 0                    | 0                   | 0                    |
| <b>seq310</b>  | Firmicutes    | Clostridia   | 0                   | 0                    | 0                   | 0                    |
| <b>seq320</b>  | Firmicutes    | Clostridia   | 0                   | 0                    | 0                   | 0                    |
| <b>seq349</b>  | Firmicutes    | Clostridia   | 0                   | 0                    | 0                   | 0                    |
| <b>seq373</b>  | Firmicutes    | Clostridia   | 0                   | 0                    | 0                   | 0                    |
| <b>seq394</b>  | Firmicutes    | Clostridia   | 901                 | 392                  | 0                   | 0                    |
| <b>seq402</b>  | Firmicutes    | Clostridia   | 0                   | 0                    | 0                   | 0                    |
| <b>seq448</b>  | Firmicutes    | Clostridia   | 0                   | 0                    | 0                   | 0                    |
| <b>seq591</b>  | Firmicutes    | Clostridia   | 0                   | 0                    | 0                   | 0                    |
| <b>seq663</b>  | Firmicutes    | Clostridia   | 0                   | 0                    | 0                   | 0                    |
| <b>seq895</b>  | Firmicutes    | Clostridia   | 0                   | 0                    | 0                   | 0                    |
| <b>seq927</b>  | Firmicutes    | Clostridia   | 0                   | 0                    | 0                   | 0                    |
| <b>seq1426</b> | Firmicutes    | Clostridia   | 0                   | 0                    | 0                   | 0                    |
| <b>seq21</b>   | Firmicutes    | Clostridia   | 546                 | 308                  | 223                 | 624                  |
| <b>seq58</b>   | Firmicutes    | Clostridia   | 0                   | 0                    | 118                 | 333                  |

Sequence Count Table

|                | <b>Phylum</b> | <b>Class</b> | <b>Δ</b> |  |  |  |
|----------------|---------------|--------------|----------|--|--|--|
| <b>seq897</b>  | Firmicutes    | Clostridia   |          |  |  |  |
| <b>seq1077</b> | Firmicutes    | Clostridia   |          |  |  |  |
| <b>seq1081</b> | Firmicutes    | Clostridia   |          |  |  |  |
| <b>seq1137</b> | Firmicutes    | Clostridia   |          |  |  |  |
| <b>seq1195</b> | Firmicutes    | Clostridia   |          |  |  |  |
| <b>seq1291</b> | Firmicutes    | Clostridia   |          |  |  |  |
| <b>seq1313</b> | Firmicutes    | Clostridia   |          |  |  |  |
| <b>seq1356</b> | Firmicutes    | Clostridia   |          |  |  |  |
| <b>seq1455</b> | Firmicutes    | Clostridia   |          |  |  |  |
| <b>seq1463</b> | Firmicutes    | Clostridia   |          |  |  |  |
| <b>seq1501</b> | Firmicutes    | Clostridia   |          |  |  |  |
| <b>seq1595</b> | Firmicutes    | Clostridia   |          |  |  |  |
| <b>seq1624</b> | Firmicutes    | Clostridia   |          |  |  |  |
| <b>seq2</b>    | Firmicutes    | Clostridia   |          |  |  |  |
| <b>seq26</b>   | Firmicutes    | Clostridia   |          |  |  |  |
| <b>seq98</b>   | Firmicutes    | Clostridia   |          |  |  |  |
| <b>seq208</b>  | Firmicutes    | Clostridia   |          |  |  |  |
| <b>seq219</b>  | Firmicutes    | Clostridia   |          |  |  |  |
| <b>seq310</b>  | Firmicutes    | Clostridia   |          |  |  |  |
| <b>seq320</b>  | Firmicutes    | Clostridia   |          |  |  |  |
| <b>seq349</b>  | Firmicutes    | Clostridia   |          |  |  |  |
| <b>seq373</b>  | Firmicutes    | Clostridia   |          |  |  |  |
| <b>seq394</b>  | Firmicutes    | Clostridia   |          |  |  |  |
| <b>seq402</b>  | Firmicutes    | Clostridia   |          |  |  |  |
| <b>seq448</b>  | Firmicutes    | Clostridia   |          |  |  |  |
| <b>seq591</b>  | Firmicutes    | Clostridia   |          |  |  |  |
| <b>seq663</b>  | Firmicutes    | Clostridia   |          |  |  |  |
| <b>seq895</b>  | Firmicutes    | Clostridia   |          |  |  |  |
| <b>seq927</b>  | Firmicutes    | Clostridia   |          |  |  |  |
| <b>seq1426</b> | Firmicutes    | Clostridia   |          |  |  |  |
| <b>seq21</b>   | Firmicutes    | Clostridia   |          |  |  |  |
| <b>seq58</b>   | Firmicutes    | Clostridia   |          |  |  |  |

Sequence Count Table

|                | <b>Phylum</b> | <b>Class</b> | <b>Order</b>  | <b>Family</b>   |
|----------------|---------------|--------------|---------------|-----------------|
| <b>seq436</b>  | Firmicutes    | Clostridia   | Clostridiales | Lachnospiraceae |
| <b>seq508</b>  | Firmicutes    | Clostridia   | Clostridiales | Lachnospiraceae |
| <b>seq595</b>  | Firmicutes    | Clostridia   | Clostridiales | Lachnospiraceae |
| <b>seq607</b>  | Firmicutes    | Clostridia   | Clostridiales | Lachnospiraceae |
| <b>seq661</b>  | Firmicutes    | Clostridia   | Clostridiales | Lachnospiraceae |
| <b>seq676</b>  | Firmicutes    | Clostridia   | Clostridiales | Lachnospiraceae |
| <b>seq775</b>  | Firmicutes    | Clostridia   | Clostridiales | Lachnospiraceae |
| <b>seq816</b>  | Firmicutes    | Clostridia   | Clostridiales | Lachnospiraceae |
| <b>seq830</b>  | Firmicutes    | Clostridia   | Clostridiales | Lachnospiraceae |
| <b>seq923</b>  | Firmicutes    | Clostridia   | Clostridiales | Lachnospiraceae |
| <b>seq1007</b> | Firmicutes    | Clostridia   | Clostridiales | Lachnospiraceae |
| <b>seq1126</b> | Firmicutes    | Clostridia   | Clostridiales | Lachnospiraceae |
| <b>seq3</b>    | Firmicutes    | Clostridia   | Clostridiales | Lachnospiraceae |
| <b>seq13</b>   | Firmicutes    | Clostridia   | Clostridiales | Lachnospiraceae |
| <b>seq22</b>   | Firmicutes    | Clostridia   | Clostridiales | Lachnospiraceae |
| <b>seq30</b>   | Firmicutes    | Clostridia   | Clostridiales | Lachnospiraceae |
| <b>seq107</b>  | Firmicutes    | Clostridia   | Clostridiales | Lachnospiraceae |
| <b>seq124</b>  | Firmicutes    | Clostridia   | Clostridiales | Lachnospiraceae |
| <b>seq157</b>  | Firmicutes    | Clostridia   | Clostridiales | Lachnospiraceae |
| <b>seq201</b>  | Firmicutes    | Clostridia   | Clostridiales | Lachnospiraceae |
| <b>seq218</b>  | Firmicutes    | Clostridia   | Clostridiales | Lachnospiraceae |
| <b>seq223</b>  | Firmicutes    | Clostridia   | Clostridiales | Lachnospiraceae |
| <b>seq234</b>  | Firmicutes    | Clostridia   | Clostridiales | Lachnospiraceae |
| <b>seq260</b>  | Firmicutes    | Clostridia   | Clostridiales | Lachnospiraceae |
| <b>seq267</b>  | Firmicutes    | Clostridia   | Clostridiales | Lachnospiraceae |
| <b>seq322</b>  | Firmicutes    | Clostridia   | Clostridiales | Lachnospiraceae |
| <b>seq369</b>  | Firmicutes    | Clostridia   | Clostridiales | Lachnospiraceae |
| <b>seq392</b>  | Firmicutes    | Clostridia   | Clostridiales | Lachnospiraceae |
| <b>seq400</b>  | Firmicutes    | Clostridia   | Clostridiales | Lachnospiraceae |
| <b>seq414</b>  | Firmicutes    | Clostridia   | Clostridiales | Lachnospiraceae |
| <b>seq457</b>  | Firmicutes    | Clostridia   | Clostridiales | Lachnospiraceae |
| <b>seq468</b>  | Firmicutes    | Clostridia   | Clostridiales | Lachnospiraceae |

Sequence Count Table

|                | <b>Phylum</b> | <b>Class</b> | <b>Genus</b> | <b>Species</b> |
|----------------|---------------|--------------|--------------|----------------|
| <b>seq436</b>  | Firmicutes    | Clostridia   | Anaerostipes | caccae         |
| <b>seq508</b>  | Firmicutes    | Clostridia   | Anaerostipes |                |
| <b>seq595</b>  | Firmicutes    | Clostridia   | Anaerostipes |                |
| <b>seq607</b>  | Firmicutes    | Clostridia   | Anaerostipes |                |
| <b>seq661</b>  | Firmicutes    | Clostridia   | Anaerostipes |                |
| <b>seq676</b>  | Firmicutes    | Clostridia   | Anaerostipes |                |
| <b>seq775</b>  | Firmicutes    | Clostridia   | Anaerostipes |                |
| <b>seq816</b>  | Firmicutes    | Clostridia   | Anaerostipes |                |
| <b>seq830</b>  | Firmicutes    | Clostridia   | Anaerostipes |                |
| <b>seq923</b>  | Firmicutes    | Clostridia   | Anaerostipes |                |
| <b>seq1007</b> | Firmicutes    | Clostridia   | Anaerostipes |                |
| <b>seq1126</b> | Firmicutes    | Clostridia   | Anaerostipes |                |
| <b>seq3</b>    | Firmicutes    | Clostridia   | Blautia      |                |
| <b>seq13</b>   | Firmicutes    | Clostridia   | Blautia      | massiliensis   |
| <b>seq22</b>   | Firmicutes    | Clostridia   | Blautia      | obeum          |
| <b>seq30</b>   | Firmicutes    | Clostridia   | Blautia      | faecis         |
| <b>seq107</b>  | Firmicutes    | Clostridia   | Blautia      | caecimuris     |
| <b>seq124</b>  | Firmicutes    | Clostridia   | Blautia      |                |
| <b>seq157</b>  | Firmicutes    | Clostridia   | Blautia      |                |
| <b>seq201</b>  | Firmicutes    | Clostridia   | Blautia      |                |
| <b>seq218</b>  | Firmicutes    | Clostridia   | Blautia      | stercoris      |
| <b>seq223</b>  | Firmicutes    | Clostridia   | Blautia      |                |
| <b>seq234</b>  | Firmicutes    | Clostridia   | Blautia      |                |
| <b>seq260</b>  | Firmicutes    | Clostridia   | Blautia      |                |
| <b>seq267</b>  | Firmicutes    | Clostridia   | Blautia      |                |
| <b>seq322</b>  | Firmicutes    | Clostridia   | Blautia      |                |
| <b>seq369</b>  | Firmicutes    | Clostridia   | Blautia      |                |
| <b>seq392</b>  | Firmicutes    | Clostridia   | Blautia      |                |
| <b>seq400</b>  | Firmicutes    | Clostridia   | Blautia      |                |
| <b>seq414</b>  | Firmicutes    | Clostridia   | Blautia      | luti           |
| <b>seq457</b>  | Firmicutes    | Clostridia   | Blautia      |                |
| <b>seq468</b>  | Firmicutes    | Clostridia   | Blautia      |                |

Sequence Count Table

|                | <b>Phylum</b> | <b>Class</b> | <b>Subject34WK0</b> | <b>Subject34WK12</b> | <b>Subject16WK0</b> | <b>Subject16WK12</b> |
|----------------|---------------|--------------|---------------------|----------------------|---------------------|----------------------|
| <b>seq436</b>  | Firmicutes    | Clostridia   | 0                   | 0                    | 0                   | 0                    |
| <b>seq508</b>  | Firmicutes    | Clostridia   | 0                   | 0                    | 0                   | 0                    |
| <b>seq595</b>  | Firmicutes    | Clostridia   | 0                   | 0                    | 0                   | 0                    |
| <b>seq607</b>  | Firmicutes    | Clostridia   | 0                   | 0                    | 0                   | 0                    |
| <b>seq661</b>  | Firmicutes    | Clostridia   | 0                   | 0                    | 0                   | 0                    |
| <b>seq676</b>  | Firmicutes    | Clostridia   | 0                   | 0                    | 0                   | 0                    |
| <b>seq775</b>  | Firmicutes    | Clostridia   | 0                   | 0                    | 0                   | 0                    |
| <b>seq816</b>  | Firmicutes    | Clostridia   | 0                   | 0                    | 0                   | 125                  |
| <b>seq830</b>  | Firmicutes    | Clostridia   | 0                   | 0                    | 0                   | 0                    |
| <b>seq923</b>  | Firmicutes    | Clostridia   | 0                   | 0                    | 0                   | 0                    |
| <b>seq1007</b> | Firmicutes    | Clostridia   | 0                   | 0                    | 0                   | 0                    |
| <b>seq1126</b> | Firmicutes    | Clostridia   | 0                   | 0                    | 0                   | 0                    |
| <b>seq3</b>    | Firmicutes    | Clostridia   | 533                 | 1503                 | 1600                | 2677                 |
| <b>seq13</b>   | Firmicutes    | Clostridia   | 159                 | 986                  | 606                 | 824                  |
| <b>seq22</b>   | Firmicutes    | Clostridia   | 52                  | 317                  | 560                 | 683                  |
| <b>seq30</b>   | Firmicutes    | Clostridia   | 421                 | 2382                 | 425                 | 383                  |
| <b>seq107</b>  | Firmicutes    | Clostridia   | 0                   | 0                    | 0                   | 0                    |
| <b>seq124</b>  | Firmicutes    | Clostridia   | 34                  | 74                   | 203                 | 175                  |
| <b>seq157</b>  | Firmicutes    | Clostridia   | 0                   | 0                    | 0                   | 0                    |
| <b>seq201</b>  | Firmicutes    | Clostridia   | 0                   | 241                  | 158                 | 268                  |
| <b>seq218</b>  | Firmicutes    | Clostridia   | 0                   | 0                    | 113                 | 60                   |
| <b>seq223</b>  | Firmicutes    | Clostridia   | 0                   | 0                    | 0                   | 0                    |
| <b>seq234</b>  | Firmicutes    | Clostridia   | 0                   | 0                    | 0                   | 0                    |
| <b>seq260</b>  | Firmicutes    | Clostridia   | 16                  | 46                   | 19                  | 29                   |
| <b>seq267</b>  | Firmicutes    | Clostridia   | 0                   | 0                    | 0                   | 0                    |
| <b>seq322</b>  | Firmicutes    | Clostridia   | 0                   | 0                    | 0                   | 0                    |
| <b>seq369</b>  | Firmicutes    | Clostridia   | 0                   | 0                    | 0                   | 0                    |
| <b>seq392</b>  | Firmicutes    | Clostridia   | 0                   | 0                    | 0                   | 0                    |
| <b>seq400</b>  | Firmicutes    | Clostridia   | 0                   | 0                    | 0                   | 0                    |
| <b>seq414</b>  | Firmicutes    | Clostridia   | 0                   | 0                    | 0                   | 0                    |
| <b>seq457</b>  | Firmicutes    | Clostridia   | 0                   | 0                    | 0                   | 0                    |
| <b>seq468</b>  | Firmicutes    | Clostridia   | 0                   | 0                    | 0                   | 0                    |

Sequence Count Table

|                | <b>Phylum</b> | <b>Class</b> | <b>Subject17WK0</b> | <b>Subject17WK12</b> | <b>Subject1WK0</b> | <b>Subject1WK12</b> |
|----------------|---------------|--------------|---------------------|----------------------|--------------------|---------------------|
| <b>seq436</b>  | Firmicutes    | Clostridia   | 0                   | 0                    | 0                  | 0                   |
| <b>seq508</b>  | Firmicutes    | Clostridia   | 0                   | 0                    | 0                  | 0                   |
| <b>seq595</b>  | Firmicutes    | Clostridia   | 0                   | 0                    | 0                  | 0                   |
| <b>seq607</b>  | Firmicutes    | Clostridia   | 0                   | 0                    | 0                  | 0                   |
| <b>seq661</b>  | Firmicutes    | Clostridia   | 0                   | 0                    | 0                  | 0                   |
| <b>seq676</b>  | Firmicutes    | Clostridia   | 155                 | 256                  | 0                  | 0                   |
| <b>seq775</b>  | Firmicutes    | Clostridia   | 0                   | 0                    | 0                  | 0                   |
| <b>seq816</b>  | Firmicutes    | Clostridia   | 0                   | 0                    | 0                  | 0                   |
| <b>seq830</b>  | Firmicutes    | Clostridia   | 0                   | 0                    | 0                  | 0                   |
| <b>seq923</b>  | Firmicutes    | Clostridia   | 0                   | 0                    | 0                  | 0                   |
| <b>seq1007</b> | Firmicutes    | Clostridia   | 0                   | 0                    | 0                  | 0                   |
| <b>seq1126</b> | Firmicutes    | Clostridia   | 0                   | 0                    | 0                  | 0                   |
| <b>seq3</b>    | Firmicutes    | Clostridia   | 2847                | 10728                | 9828               | 11108               |
| <b>seq13</b>   | Firmicutes    | Clostridia   | 578                 | 2186                 | 977                | 988                 |
| <b>seq22</b>   | Firmicutes    | Clostridia   | 1186                | 3444                 | 619                | 582                 |
| <b>seq30</b>   | Firmicutes    | Clostridia   | 388                 | 721                  | 3189               | 3036                |
| <b>seq107</b>  | Firmicutes    | Clostridia   | 0                   | 0                    | 112                | 115                 |
| <b>seq124</b>  | Firmicutes    | Clostridia   | 71                  | 321                  | 0                  | 0                   |
| <b>seq157</b>  | Firmicutes    | Clostridia   | 0                   | 0                    | 0                  | 0                   |
| <b>seq201</b>  | Firmicutes    | Clostridia   | 265                 | 400                  | 0                  | 0                   |
| <b>seq218</b>  | Firmicutes    | Clostridia   | 10                  | 160                  | 0                  | 0                   |
| <b>seq223</b>  | Firmicutes    | Clostridia   | 0                   | 0                    | 0                  | 0                   |
| <b>seq234</b>  | Firmicutes    | Clostridia   | 0                   | 0                    | 38                 | 30                  |
| <b>seq260</b>  | Firmicutes    | Clostridia   | 29                  | 50                   | 10                 | 0                   |
| <b>seq267</b>  | Firmicutes    | Clostridia   | 0                   | 0                    | 0                  | 0                   |
| <b>seq322</b>  | Firmicutes    | Clostridia   | 0                   | 0                    | 0                  | 0                   |
| <b>seq369</b>  | Firmicutes    | Clostridia   | 0                   | 0                    | 0                  | 0                   |
| <b>seq392</b>  | Firmicutes    | Clostridia   | 0                   | 0                    | 602                | 721                 |
| <b>seq400</b>  | Firmicutes    | Clostridia   | 0                   | 0                    | 0                  | 0                   |
| <b>seq414</b>  | Firmicutes    | Clostridia   | 0                   | 0                    | 0                  | 0                   |
| <b>seq457</b>  | Firmicutes    | Clostridia   | 0                   | 0                    | 0                  | 0                   |
| <b>seq468</b>  | Firmicutes    | Clostridia   | 0                   | 0                    | 0                  | 0                   |



Sequence Count Table

|                | <b>Phylum</b> | <b>Class</b> | <b>Subject2WK0</b> | <b>Subject2WK12</b> | <b>Subject3WK0</b> | <b>Subject3WK12</b> |
|----------------|---------------|--------------|--------------------|---------------------|--------------------|---------------------|
| <b>seq436</b>  | Firmicutes    | Clostridia   | 5                  | 0                   | 451                | 98                  |
| <b>seq508</b>  | Firmicutes    | Clostridia   | 0                  | 0                   | 0                  | 0                   |
| <b>seq595</b>  | Firmicutes    | Clostridia   | 0                  | 0                   | 0                  | 0                   |
| <b>seq607</b>  | Firmicutes    | Clostridia   | 0                  | 0                   | 0                  | 0                   |
| <b>seq661</b>  | Firmicutes    | Clostridia   | 0                  | 0                   | 0                  | 0                   |
| <b>seq676</b>  | Firmicutes    | Clostridia   | 0                  | 0                   | 0                  | 0                   |
| <b>seq775</b>  | Firmicutes    | Clostridia   | 0                  | 0                   | 0                  | 0                   |
| <b>seq816</b>  | Firmicutes    | Clostridia   | 0                  | 0                   | 0                  | 0                   |
| <b>seq830</b>  | Firmicutes    | Clostridia   | 0                  | 0                   | 0                  | 0                   |
| <b>seq923</b>  | Firmicutes    | Clostridia   | 0                  | 0                   | 0                  | 0                   |
| <b>seq1007</b> | Firmicutes    | Clostridia   | 0                  | 0                   | 0                  | 0                   |
| <b>seq1126</b> | Firmicutes    | Clostridia   | 0                  | 0                   | 0                  | 0                   |
| <b>seq3</b>    | Firmicutes    | Clostridia   | 3109               | 361                 | 15409              | 6960                |
| <b>seq13</b>   | Firmicutes    | Clostridia   | 1767               | 1905                | 11523              | 1223                |
| <b>seq22</b>   | Firmicutes    | Clostridia   | 1931               | 3647                | 7927               | 4247                |
| <b>seq30</b>   | Firmicutes    | Clostridia   | 788                | 409                 | 1831               | 1449                |
| <b>seq107</b>  | Firmicutes    | Clostridia   | 0                  | 0                   | 0                  | 0                   |
| <b>seq124</b>  | Firmicutes    | Clostridia   | 113                | 208                 | 686                | 262                 |
| <b>seq157</b>  | Firmicutes    | Clostridia   | 0                  | 0                   | 1757               | 31                  |
| <b>seq201</b>  | Firmicutes    | Clostridia   | 0                  | 0                   | 0                  | 0                   |
| <b>seq218</b>  | Firmicutes    | Clostridia   | 0                  | 0                   | 0                  | 0                   |
| <b>seq223</b>  | Firmicutes    | Clostridia   | 0                  | 0                   | 0                  | 0                   |
| <b>seq234</b>  | Firmicutes    | Clostridia   | 0                  | 0                   | 0                  | 0                   |
| <b>seq260</b>  | Firmicutes    | Clostridia   | 44                 | 29                  | 0                  | 0                   |
| <b>seq267</b>  | Firmicutes    | Clostridia   | 0                  | 0                   | 494                | 22                  |
| <b>seq322</b>  | Firmicutes    | Clostridia   | 0                  | 0                   | 0                  | 0                   |
| <b>seq369</b>  | Firmicutes    | Clostridia   | 0                  | 0                   | 0                  | 0                   |
| <b>seq392</b>  | Firmicutes    | Clostridia   | 0                  | 0                   | 0                  | 0                   |
| <b>seq400</b>  | Firmicutes    | Clostridia   | 0                  | 0                   | 0                  | 0                   |
| <b>seq414</b>  | Firmicutes    | Clostridia   | 0                  | 0                   | 0                  | 0                   |
| <b>seq457</b>  | Firmicutes    | Clostridia   | 0                  | 0                   | 889                | 65                  |
| <b>seq468</b>  | Firmicutes    | Clostridia   | 0                  | 0                   | 56                 | 0                   |

Sequence Count Table

|                | <b>Phylum</b> | <b>Class</b> | <b>Subject4WK0</b> | <b>Subject4WK12</b> | <b>Subject5WK0</b> | <b>Subject5WK12</b> |
|----------------|---------------|--------------|--------------------|---------------------|--------------------|---------------------|
| <b>seq436</b>  | Firmicutes    | Clostridia   | 9                  | 7                   | 11                 | 11                  |
| <b>seq508</b>  | Firmicutes    | Clostridia   | 0                  | 0                   | 0                  | 0                   |
| <b>seq595</b>  | Firmicutes    | Clostridia   | 0                  | 0                   | 241                | 297                 |
| <b>seq607</b>  | Firmicutes    | Clostridia   | 0                  | 0                   | 0                  | 0                   |
| <b>seq661</b>  | Firmicutes    | Clostridia   | 0                  | 0                   | 0                  | 0                   |
| <b>seq676</b>  | Firmicutes    | Clostridia   | 0                  | 0                   | 0                  | 0                   |
| <b>seq775</b>  | Firmicutes    | Clostridia   | 0                  | 0                   | 0                  | 0                   |
| <b>seq816</b>  | Firmicutes    | Clostridia   | 130                | 0                   | 0                  | 0                   |
| <b>seq830</b>  | Firmicutes    | Clostridia   | 0                  | 0                   | 0                  | 0                   |
| <b>seq923</b>  | Firmicutes    | Clostridia   | 0                  | 0                   | 0                  | 0                   |
| <b>seq1007</b> | Firmicutes    | Clostridia   | 140                | 0                   | 0                  | 0                   |
| <b>seq1126</b> | Firmicutes    | Clostridia   | 0                  | 0                   | 0                  | 0                   |
| <b>seq3</b>    | Firmicutes    | Clostridia   | 3396               | 1269                | 3770               | 5736                |
| <b>seq13</b>   | Firmicutes    | Clostridia   | 723                | 679                 | 2186               | 1944                |
| <b>seq22</b>   | Firmicutes    | Clostridia   | 5104               | 1426                | 434                | 1000                |
| <b>seq30</b>   | Firmicutes    | Clostridia   | 1730               | 786                 | 413                | 729                 |
| <b>seq107</b>  | Firmicutes    | Clostridia   | 32                 | 59                  | 0                  | 9                   |
| <b>seq124</b>  | Firmicutes    | Clostridia   | 374                | 323                 | 112                | 193                 |
| <b>seq157</b>  | Firmicutes    | Clostridia   | 0                  | 0                   | 7                  | 0                   |
| <b>seq201</b>  | Firmicutes    | Clostridia   | 0                  | 0                   | 0                  | 0                   |
| <b>seq218</b>  | Firmicutes    | Clostridia   | 672                | 43                  | 0                  | 0                   |
| <b>seq223</b>  | Firmicutes    | Clostridia   | 0                  | 0                   | 0                  | 0                   |
| <b>seq234</b>  | Firmicutes    | Clostridia   | 0                  | 0                   | 0                  | 0                   |
| <b>seq260</b>  | Firmicutes    | Clostridia   | 482                | 23                  | 60                 | 82                  |
| <b>seq267</b>  | Firmicutes    | Clostridia   | 0                  | 0                   | 0                  | 0                   |
| <b>seq322</b>  | Firmicutes    | Clostridia   | 0                  | 0                   | 215                | 168                 |
| <b>seq369</b>  | Firmicutes    | Clostridia   | 0                  | 0                   | 0                  | 0                   |
| <b>seq392</b>  | Firmicutes    | Clostridia   | 0                  | 0                   | 0                  | 0                   |
| <b>seq400</b>  | Firmicutes    | Clostridia   | 0                  | 0                   | 0                  | 0                   |
| <b>seq414</b>  | Firmicutes    | Clostridia   | 0                  | 0                   | 0                  | 0                   |
| <b>seq457</b>  | Firmicutes    | Clostridia   | 0                  | 0                   | 0                  | 0                   |
| <b>seq468</b>  | Firmicutes    | Clostridia   | 0                  | 0                   | 0                  | 0                   |

Sequence Count Table

|                | <b>Phylum</b> | <b>Class</b> | <b>Subject6WK0</b> | <b>Subject6WK12</b> | <b>Subject18WK0</b> | <b>Subject18WK12</b> |
|----------------|---------------|--------------|--------------------|---------------------|---------------------|----------------------|
| <b>seq436</b>  | Firmicutes    | Clostridia   | 0                  | 0                   | 0                   | 0                    |
| <b>seq508</b>  | Firmicutes    | Clostridia   | 0                  | 0                   | 0                   | 0                    |
| <b>seq595</b>  | Firmicutes    | Clostridia   | 0                  | 0                   | 0                   | 0                    |
| <b>seq607</b>  | Firmicutes    | Clostridia   | 0                  | 0                   | 0                   | 0                    |
| <b>seq661</b>  | Firmicutes    | Clostridia   | 0                  | 0                   | 0                   | 0                    |
| <b>seq676</b>  | Firmicutes    | Clostridia   | 0                  | 0                   | 0                   | 0                    |
| <b>seq775</b>  | Firmicutes    | Clostridia   | 0                  | 0                   | 0                   | 0                    |
| <b>seq816</b>  | Firmicutes    | Clostridia   | 0                  | 0                   | 0                   | 0                    |
| <b>seq830</b>  | Firmicutes    | Clostridia   | 0                  | 0                   | 104                 | 143                  |
| <b>seq923</b>  | Firmicutes    | Clostridia   | 0                  | 0                   | 0                   | 0                    |
| <b>seq1007</b> | Firmicutes    | Clostridia   | 0                  | 0                   | 0                   | 0                    |
| <b>seq1126</b> | Firmicutes    | Clostridia   | 0                  | 0                   | 0                   | 0                    |
| <b>seq3</b>    | Firmicutes    | Clostridia   | 2752               | 4199                | 4885                | 2292                 |
| <b>seq13</b>   | Firmicutes    | Clostridia   | 1303               | 1807                | 1174                | 1677                 |
| <b>seq22</b>   | Firmicutes    | Clostridia   | 761                | 1358                | 2269                | 1222                 |
| <b>seq30</b>   | Firmicutes    | Clostridia   | 312                | 694                 | 807                 | 566                  |
| <b>seq107</b>  | Firmicutes    | Clostridia   | 0                  | 0                   | 525                 | 227                  |
| <b>seq124</b>  | Firmicutes    | Clostridia   | 572                | 598                 | 0                   | 0                    |
| <b>seq157</b>  | Firmicutes    | Clostridia   | 0                  | 0                   | 15                  | 0                    |
| <b>seq201</b>  | Firmicutes    | Clostridia   | 287                | 729                 | 0                   | 0                    |
| <b>seq218</b>  | Firmicutes    | Clostridia   | 95                 | 226                 | 0                   | 0                    |
| <b>seq223</b>  | Firmicutes    | Clostridia   | 372                | 1077                | 0                   | 0                    |
| <b>seq234</b>  | Firmicutes    | Clostridia   | 0                  | 0                   | 0                   | 0                    |
| <b>seq260</b>  | Firmicutes    | Clostridia   | 110                | 103                 | 33                  | 8                    |
| <b>seq267</b>  | Firmicutes    | Clostridia   | 0                  | 0                   | 85                  | 15                   |
| <b>seq322</b>  | Firmicutes    | Clostridia   | 0                  | 0                   | 0                   | 0                    |
| <b>seq369</b>  | Firmicutes    | Clostridia   | 0                  | 0                   | 0                   | 0                    |
| <b>seq392</b>  | Firmicutes    | Clostridia   | 0                  | 0                   | 0                   | 0                    |
| <b>seq400</b>  | Firmicutes    | Clostridia   | 0                  | 0                   | 0                   | 0                    |
| <b>seq414</b>  | Firmicutes    | Clostridia   | 0                  | 0                   | 0                   | 0                    |
| <b>seq457</b>  | Firmicutes    | Clostridia   | 0                  | 0                   | 0                   | 0                    |
| <b>seq468</b>  | Firmicutes    | Clostridia   | 0                  | 0                   | 181                 | 47                   |

Sequence Count Table

|                | <b>Phylum</b> | <b>Class</b> | <b>Subject19WK0</b> | <b>Subject19WK12</b> | <b>Subject20WK0</b> | <b>Subject20WK12</b> |
|----------------|---------------|--------------|---------------------|----------------------|---------------------|----------------------|
| <b>seq436</b>  | Firmicutes    | Clostridia   | 0                   | 10                   | 0                   | 0                    |
| <b>seq508</b>  | Firmicutes    | Clostridia   | 0                   | 0                    | 0                   | 0                    |
| <b>seq595</b>  | Firmicutes    | Clostridia   | 0                   | 0                    | 0                   | 0                    |
| <b>seq607</b>  | Firmicutes    | Clostridia   | 0                   | 0                    | 0                   | 0                    |
| <b>seq661</b>  | Firmicutes    | Clostridia   | 292                 | 154                  | 0                   | 0                    |
| <b>seq676</b>  | Firmicutes    | Clostridia   | 0                   | 0                    | 0                   | 0                    |
| <b>seq775</b>  | Firmicutes    | Clostridia   | 0                   | 0                    | 0                   | 0                    |
| <b>seq816</b>  | Firmicutes    | Clostridia   | 0                   | 0                    | 0                   | 0                    |
| <b>seq830</b>  | Firmicutes    | Clostridia   | 0                   | 0                    | 0                   | 0                    |
| <b>seq923</b>  | Firmicutes    | Clostridia   | 0                   | 0                    | 0                   | 0                    |
| <b>seq1007</b> | Firmicutes    | Clostridia   | 0                   | 0                    | 0                   | 0                    |
| <b>seq1126</b> | Firmicutes    | Clostridia   | 0                   | 0                    | 0                   | 0                    |
| <b>seq3</b>    | Firmicutes    | Clostridia   | 7878                | 11823                | 1565                | 1708                 |
| <b>seq13</b>   | Firmicutes    | Clostridia   | 3058                | 4443                 | 1326                | 816                  |
| <b>seq22</b>   | Firmicutes    | Clostridia   | 614                 | 604                  | 201                 | 260                  |
| <b>seq30</b>   | Firmicutes    | Clostridia   | 710                 | 988                  | 126                 | 112                  |
| <b>seq107</b>  | Firmicutes    | Clostridia   | 2122                | 964                  | 0                   | 0                    |
| <b>seq124</b>  | Firmicutes    | Clostridia   | 25                  | 29                   | 614                 | 622                  |
| <b>seq157</b>  | Firmicutes    | Clostridia   | 0                   | 0                    | 0                   | 0                    |
| <b>seq201</b>  | Firmicutes    | Clostridia   | 0                   | 0                    | 197                 | 257                  |
| <b>seq218</b>  | Firmicutes    | Clostridia   | 448                 | 448                  | 51                  | 204                  |
| <b>seq223</b>  | Firmicutes    | Clostridia   | 0                   | 0                    | 0                   | 0                    |
| <b>seq234</b>  | Firmicutes    | Clostridia   | 125                 | 55                   | 0                   | 0                    |
| <b>seq260</b>  | Firmicutes    | Clostridia   | 0                   | 0                    | 40                  | 21                   |
| <b>seq267</b>  | Firmicutes    | Clostridia   | 475                 | 385                  | 0                   | 0                    |
| <b>seq322</b>  | Firmicutes    | Clostridia   | 0                   | 0                    | 0                   | 0                    |
| <b>seq369</b>  | Firmicutes    | Clostridia   | 0                   | 0                    | 0                   | 0                    |
| <b>seq392</b>  | Firmicutes    | Clostridia   | 0                   | 0                    | 0                   | 0                    |
| <b>seq400</b>  | Firmicutes    | Clostridia   | 0                   | 0                    | 0                   | 0                    |
| <b>seq414</b>  | Firmicutes    | Clostridia   | 0                   | 0                    | 0                   | 0                    |
| <b>seq457</b>  | Firmicutes    | Clostridia   | 0                   | 0                    | 0                   | 0                    |
| <b>seq468</b>  | Firmicutes    | Clostridia   | 0                   | 0                    | 0                   | 0                    |

Sequence Count Table

|                | <b>Phylum</b> | <b>Class</b> | <b>Subject7WK0</b> | <b>Subject7WK12</b> | <b>Subject21WK0</b> | <b>Subject21WK12</b> |
|----------------|---------------|--------------|--------------------|---------------------|---------------------|----------------------|
| <b>seq436</b>  | Firmicutes    | Clostridia   | 19                 | 0                   | 69                  | 87                   |
| <b>seq508</b>  | Firmicutes    | Clostridia   | 0                  | 0                   | 243                 | 525                  |
| <b>seq595</b>  | Firmicutes    | Clostridia   | 0                  | 0                   | 0                   | 0                    |
| <b>seq607</b>  | Firmicutes    | Clostridia   | 0                  | 0                   | 0                   | 0                    |
| <b>seq661</b>  | Firmicutes    | Clostridia   | 0                  | 0                   | 0                   | 0                    |
| <b>seq676</b>  | Firmicutes    | Clostridia   | 0                  | 0                   | 0                   | 0                    |
| <b>seq775</b>  | Firmicutes    | Clostridia   | 0                  | 0                   | 0                   | 0                    |
| <b>seq816</b>  | Firmicutes    | Clostridia   | 0                  | 0                   | 0                   | 0                    |
| <b>seq830</b>  | Firmicutes    | Clostridia   | 0                  | 0                   | 0                   | 0                    |
| <b>seq923</b>  | Firmicutes    | Clostridia   | 0                  | 0                   | 0                   | 0                    |
| <b>seq1007</b> | Firmicutes    | Clostridia   | 0                  | 0                   | 0                   | 0                    |
| <b>seq1126</b> | Firmicutes    | Clostridia   | 0                  | 0                   | 0                   | 0                    |
| <b>seq3</b>    | Firmicutes    | Clostridia   | 12332              | 11021               | 19853               | 12778                |
| <b>seq13</b>   | Firmicutes    | Clostridia   | 1457               | 546                 | 0                   | 0                    |
| <b>seq22</b>   | Firmicutes    | Clostridia   | 576                | 226                 | 0                   | 0                    |
| <b>seq30</b>   | Firmicutes    | Clostridia   | 734                | 366                 | 2976                | 320                  |
| <b>seq107</b>  | Firmicutes    | Clostridia   | 106                | 214                 | 1141                | 3346                 |
| <b>seq124</b>  | Firmicutes    | Clostridia   | 45                 | 13                  | 0                   | 0                    |
| <b>seq157</b>  | Firmicutes    | Clostridia   | 13                 | 0                   | 339                 | 737                  |
| <b>seq201</b>  | Firmicutes    | Clostridia   | 0                  | 0                   | 0                   | 0                    |
| <b>seq218</b>  | Firmicutes    | Clostridia   | 0                  | 0                   | 0                   | 0                    |
| <b>seq223</b>  | Firmicutes    | Clostridia   | 0                  | 0                   | 0                   | 0                    |
| <b>seq234</b>  | Firmicutes    | Clostridia   | 0                  | 0                   | 0                   | 0                    |
| <b>seq260</b>  | Firmicutes    | Clostridia   | 72                 | 47                  | 0                   | 0                    |
| <b>seq267</b>  | Firmicutes    | Clostridia   | 0                  | 0                   | 0                   | 0                    |
| <b>seq322</b>  | Firmicutes    | Clostridia   | 0                  | 0                   | 0                   | 0                    |
| <b>seq369</b>  | Firmicutes    | Clostridia   | 0                  | 0                   | 0                   | 0                    |
| <b>seq392</b>  | Firmicutes    | Clostridia   | 0                  | 0                   | 0                   | 0                    |
| <b>seq400</b>  | Firmicutes    | Clostridia   | 0                  | 0                   | 245                 | 603                  |
| <b>seq414</b>  | Firmicutes    | Clostridia   | 640                | 533                 | 0                   | 0                    |
| <b>seq457</b>  | Firmicutes    | Clostridia   | 0                  | 0                   | 0                   | 0                    |
| <b>seq468</b>  | Firmicutes    | Clostridia   | 0                  | 0                   | 0                   | 0                    |

Sequence Count Table

|                | <b>Phylum</b> | <b>Class</b> | <b>Subject8WK0</b> | <b>Subject8WK12</b> | <b>Subject9WK0</b> | <b>Subject9WK12</b> |
|----------------|---------------|--------------|--------------------|---------------------|--------------------|---------------------|
| <b>seq436</b>  | Firmicutes    | Clostridia   | 0                  | 0                   | 0                  | 0                   |
| <b>seq508</b>  | Firmicutes    | Clostridia   | 0                  | 0                   | 0                  | 0                   |
| <b>seq595</b>  | Firmicutes    | Clostridia   | 0                  | 0                   | 0                  | 0                   |
| <b>seq607</b>  | Firmicutes    | Clostridia   | 0                  | 0                   | 0                  | 0                   |
| <b>seq661</b>  | Firmicutes    | Clostridia   | 0                  | 0                   | 0                  | 0                   |
| <b>seq676</b>  | Firmicutes    | Clostridia   | 0                  | 0                   | 0                  | 0                   |
| <b>seq775</b>  | Firmicutes    | Clostridia   | 0                  | 0                   | 0                  | 0                   |
| <b>seq816</b>  | Firmicutes    | Clostridia   | 0                  | 0                   | 0                  | 0                   |
| <b>seq830</b>  | Firmicutes    | Clostridia   | 0                  | 0                   | 0                  | 0                   |
| <b>seq923</b>  | Firmicutes    | Clostridia   | 0                  | 0                   | 0                  | 0                   |
| <b>seq1007</b> | Firmicutes    | Clostridia   | 0                  | 0                   | 0                  | 0                   |
| <b>seq1126</b> | Firmicutes    | Clostridia   | 0                  | 0                   | 0                  | 0                   |
| <b>seq3</b>    | Firmicutes    | Clostridia   | 2394               | 4301                | 6494               | 2813                |
| <b>seq13</b>   | Firmicutes    | Clostridia   | 2656               | 3520                | 1611               | 513                 |
| <b>seq22</b>   | Firmicutes    | Clostridia   | 887                | 913                 | 726                | 195                 |
| <b>seq30</b>   | Firmicutes    | Clostridia   | 840                | 915                 | 1371               | 137                 |
| <b>seq107</b>  | Firmicutes    | Clostridia   | 0                  | 0                   | 372                | 841                 |
| <b>seq124</b>  | Firmicutes    | Clostridia   | 77                 | 141                 | 0                  | 0                   |
| <b>seq157</b>  | Firmicutes    | Clostridia   | 0                  | 0                   | 627                | 1646                |
| <b>seq201</b>  | Firmicutes    | Clostridia   | 207                | 341                 | 0                  | 0                   |
| <b>seq218</b>  | Firmicutes    | Clostridia   | 0                  | 0                   | 0                  | 0                   |
| <b>seq223</b>  | Firmicutes    | Clostridia   | 0                  | 0                   | 0                  | 0                   |
| <b>seq234</b>  | Firmicutes    | Clostridia   | 0                  | 0                   | 581                | 584                 |
| <b>seq260</b>  | Firmicutes    | Clostridia   | 0                  | 0                   | 133                | 22                  |
| <b>seq267</b>  | Firmicutes    | Clostridia   | 0                  | 0                   | 100                | 179                 |
| <b>seq322</b>  | Firmicutes    | Clostridia   | 0                  | 0                   | 0                  | 0                   |
| <b>seq369</b>  | Firmicutes    | Clostridia   | 0                  | 0                   | 0                  | 0                   |
| <b>seq392</b>  | Firmicutes    | Clostridia   | 0                  | 0                   | 0                  | 0                   |
| <b>seq400</b>  | Firmicutes    | Clostridia   | 0                  | 0                   | 0                  | 0                   |
| <b>seq414</b>  | Firmicutes    | Clostridia   | 0                  | 0                   | 0                  | 0                   |
| <b>seq457</b>  | Firmicutes    | Clostridia   | 0                  | 0                   | 0                  | 0                   |
| <b>seq468</b>  | Firmicutes    | Clostridia   | 0                  | 0                   | 371                | 230                 |

Sequence Count Table

|                | <b>Phylum</b> | <b>Class</b> | <b>Subject10WK0</b> | <b>Subject10WK12</b> | <b>Subject22WK0</b> | <b>Subject22WK12</b> |
|----------------|---------------|--------------|---------------------|----------------------|---------------------|----------------------|
| <b>seq436</b>  | Firmicutes    | Clostridia   | 148                 | 54                   | 0                   | 0                    |
| <b>seq508</b>  | Firmicutes    | Clostridia   | 0                   | 0                    | 0                   | 0                    |
| <b>seq595</b>  | Firmicutes    | Clostridia   | 0                   | 0                    | 0                   | 0                    |
| <b>seq607</b>  | Firmicutes    | Clostridia   | 278                 | 243                  | 0                   | 0                    |
| <b>seq661</b>  | Firmicutes    | Clostridia   | 0                   | 0                    | 0                   | 0                    |
| <b>seq676</b>  | Firmicutes    | Clostridia   | 0                   | 0                    | 0                   | 0                    |
| <b>seq775</b>  | Firmicutes    | Clostridia   | 0                   | 0                    | 0                   | 0                    |
| <b>seq816</b>  | Firmicutes    | Clostridia   | 0                   | 0                    | 0                   | 0                    |
| <b>seq830</b>  | Firmicutes    | Clostridia   | 0                   | 0                    | 0                   | 0                    |
| <b>seq923</b>  | Firmicutes    | Clostridia   | 0                   | 0                    | 0                   | 0                    |
| <b>seq1007</b> | Firmicutes    | Clostridia   | 0                   | 0                    | 0                   | 0                    |
| <b>seq1126</b> | Firmicutes    | Clostridia   | 0                   | 0                    | 0                   | 0                    |
| <b>seq3</b>    | Firmicutes    | Clostridia   | 11016               | 6271                 | 3595                | 1999                 |
| <b>seq13</b>   | Firmicutes    | Clostridia   | 0                   | 0                    | 2185                | 2543                 |
| <b>seq22</b>   | Firmicutes    | Clostridia   | 425                 | 278                  | 846                 | 427                  |
| <b>seq30</b>   | Firmicutes    | Clostridia   | 3286                | 1812                 | 303                 | 209                  |
| <b>seq107</b>  | Firmicutes    | Clostridia   | 198                 | 58                   | 0                   | 0                    |
| <b>seq124</b>  | Firmicutes    | Clostridia   | 0                   | 0                    | 169                 | 97                   |
| <b>seq157</b>  | Firmicutes    | Clostridia   | 371                 | 256                  | 0                   | 0                    |
| <b>seq201</b>  | Firmicutes    | Clostridia   | 0                   | 0                    | 0                   | 0                    |
| <b>seq218</b>  | Firmicutes    | Clostridia   | 0                   | 0                    | 0                   | 0                    |
| <b>seq223</b>  | Firmicutes    | Clostridia   | 0                   | 0                    | 0                   | 0                    |
| <b>seq234</b>  | Firmicutes    | Clostridia   | 1084                | 540                  | 0                   | 0                    |
| <b>seq260</b>  | Firmicutes    | Clostridia   | 0                   | 0                    | 27                  | 26                   |
| <b>seq267</b>  | Firmicutes    | Clostridia   | 0                   | 0                    | 0                   | 0                    |
| <b>seq322</b>  | Firmicutes    | Clostridia   | 0                   | 0                    | 0                   | 0                    |
| <b>seq369</b>  | Firmicutes    | Clostridia   | 0                   | 0                    | 0                   | 0                    |
| <b>seq392</b>  | Firmicutes    | Clostridia   | 0                   | 0                    | 0                   | 0                    |
| <b>seq400</b>  | Firmicutes    | Clostridia   | 0                   | 0                    | 0                   | 0                    |
| <b>seq414</b>  | Firmicutes    | Clostridia   | 0                   | 0                    | 0                   | 0                    |
| <b>seq457</b>  | Firmicutes    | Clostridia   | 0                   | 0                    | 0                   | 0                    |
| <b>seq468</b>  | Firmicutes    | Clostridia   | 0                   | 0                    | 0                   | 0                    |

Sequence Count Table

|                | <b>Phylum</b> | <b>Class</b> | <b>Subject23WK0</b> | <b>Subject23WK12</b> | <b>Subject24WK0</b> | <b>Subject24WK12</b> |
|----------------|---------------|--------------|---------------------|----------------------|---------------------|----------------------|
| <b>seq436</b>  | Firmicutes    | Clostridia   | 0                   | 0                    | 0                   | 0                    |
| <b>seq508</b>  | Firmicutes    | Clostridia   | 0                   | 0                    | 0                   | 0                    |
| <b>seq595</b>  | Firmicutes    | Clostridia   | 0                   | 0                    | 0                   | 0                    |
| <b>seq607</b>  | Firmicutes    | Clostridia   | 0                   | 0                    | 0                   | 0                    |
| <b>seq661</b>  | Firmicutes    | Clostridia   | 0                   | 0                    | 0                   | 0                    |
| <b>seq676</b>  | Firmicutes    | Clostridia   | 0                   | 0                    | 0                   | 0                    |
| <b>seq775</b>  | Firmicutes    | Clostridia   | 0                   | 0                    | 0                   | 0                    |
| <b>seq816</b>  | Firmicutes    | Clostridia   | 0                   | 0                    | 0                   | 0                    |
| <b>seq830</b>  | Firmicutes    | Clostridia   | 0                   | 0                    | 0                   | 0                    |
| <b>seq923</b>  | Firmicutes    | Clostridia   | 0                   | 0                    | 0                   | 0                    |
| <b>seq1007</b> | Firmicutes    | Clostridia   | 0                   | 0                    | 0                   | 0                    |
| <b>seq1126</b> | Firmicutes    | Clostridia   | 0                   | 0                    | 0                   | 0                    |
| <b>seq3</b>    | Firmicutes    | Clostridia   | 1194                | 1120                 | 1935                | 1655                 |
| <b>seq13</b>   | Firmicutes    | Clostridia   | 832                 | 1729                 | 870                 | 964                  |
| <b>seq22</b>   | Firmicutes    | Clostridia   | 268                 | 252                  | 898                 | 1958                 |
| <b>seq30</b>   | Firmicutes    | Clostridia   | 1985                | 1585                 | 1369                | 573                  |
| <b>seq107</b>  | Firmicutes    | Clostridia   | 0                   | 0                    | 0                   | 22                   |
| <b>seq124</b>  | Firmicutes    | Clostridia   | 207                 | 235                  | 279                 | 281                  |
| <b>seq157</b>  | Firmicutes    | Clostridia   | 0                   | 0                    | 0                   | 0                    |
| <b>seq201</b>  | Firmicutes    | Clostridia   | 0                   | 161                  | 293                 | 127                  |
| <b>seq218</b>  | Firmicutes    | Clostridia   | 0                   | 0                    | 105                 | 374                  |
| <b>seq223</b>  | Firmicutes    | Clostridia   | 0                   | 0                    | 0                   | 0                    |
| <b>seq234</b>  | Firmicutes    | Clostridia   | 0                   | 0                    | 0                   | 0                    |
| <b>seq260</b>  | Firmicutes    | Clostridia   | 199                 | 296                  | 252                 | 43                   |
| <b>seq267</b>  | Firmicutes    | Clostridia   | 0                   | 0                    | 0                   | 0                    |
| <b>seq322</b>  | Firmicutes    | Clostridia   | 0                   | 0                    | 0                   | 0                    |
| <b>seq369</b>  | Firmicutes    | Clostridia   | 0                   | 0                    | 0                   | 0                    |
| <b>seq392</b>  | Firmicutes    | Clostridia   | 0                   | 0                    | 0                   | 0                    |
| <b>seq400</b>  | Firmicutes    | Clostridia   | 0                   | 0                    | 0                   | 0                    |
| <b>seq414</b>  | Firmicutes    | Clostridia   | 0                   | 0                    | 0                   | 0                    |
| <b>seq457</b>  | Firmicutes    | Clostridia   | 0                   | 0                    | 0                   | 0                    |
| <b>seq468</b>  | Firmicutes    | Clostridia   | 0                   | 0                    | 0                   | 0                    |



Sequence Count Table

|                | <b>Phylum</b> | <b>Class</b> | <b>Subject11WK0</b> | <b>Subject11WK12</b> | <b>Subject12WK0</b> | <b>Subject12WK12</b> |
|----------------|---------------|--------------|---------------------|----------------------|---------------------|----------------------|
| <b>seq436</b>  | Firmicutes    | Clostridia   | 24                  | 10                   | 0                   | 0                    |
| <b>seq508</b>  | Firmicutes    | Clostridia   | 0                   | 0                    | 0                   | 0                    |
| <b>seq595</b>  | Firmicutes    | Clostridia   | 0                   | 0                    | 0                   | 0                    |
| <b>seq607</b>  | Firmicutes    | Clostridia   | 0                   | 0                    | 0                   | 0                    |
| <b>seq661</b>  | Firmicutes    | Clostridia   | 0                   | 0                    | 0                   | 0                    |
| <b>seq676</b>  | Firmicutes    | Clostridia   | 0                   | 0                    | 0                   | 0                    |
| <b>seq775</b>  | Firmicutes    | Clostridia   | 0                   | 0                    | 94                  | 198                  |
| <b>seq816</b>  | Firmicutes    | Clostridia   | 0                   | 0                    | 0                   | 0                    |
| <b>seq830</b>  | Firmicutes    | Clostridia   | 0                   | 0                    | 0                   | 0                    |
| <b>seq923</b>  | Firmicutes    | Clostridia   | 0                   | 0                    | 0                   | 0                    |
| <b>seq1007</b> | Firmicutes    | Clostridia   | 0                   | 0                    | 0                   | 0                    |
| <b>seq1126</b> | Firmicutes    | Clostridia   | 0                   | 0                    | 0                   | 0                    |
| <b>seq3</b>    | Firmicutes    | Clostridia   | 6624                | 12255                | 1608                | 2457                 |
| <b>seq13</b>   | Firmicutes    | Clostridia   | 1240                | 2744                 | 1657                | 3583                 |
| <b>seq22</b>   | Firmicutes    | Clostridia   | 2792                | 2357                 | 360                 | 660                  |
| <b>seq30</b>   | Firmicutes    | Clostridia   | 0                   | 0                    | 385                 | 439                  |
| <b>seq107</b>  | Firmicutes    | Clostridia   | 730                 | 602                  | 0                   | 0                    |
| <b>seq124</b>  | Firmicutes    | Clostridia   | 0                   | 0                    | 163                 | 209                  |
| <b>seq157</b>  | Firmicutes    | Clostridia   | 0                   | 0                    | 0                   | 0                    |
| <b>seq201</b>  | Firmicutes    | Clostridia   | 0                   | 0                    | 197                 | 236                  |
| <b>seq218</b>  | Firmicutes    | Clostridia   | 0                   | 0                    | 155                 | 1062                 |
| <b>seq223</b>  | Firmicutes    | Clostridia   | 917                 | 1616                 | 0                   | 0                    |
| <b>seq234</b>  | Firmicutes    | Clostridia   | 0                   | 0                    | 0                   | 0                    |
| <b>seq260</b>  | Firmicutes    | Clostridia   | 0                   | 0                    | 19                  | 33                   |
| <b>seq267</b>  | Firmicutes    | Clostridia   | 0                   | 0                    | 0                   | 0                    |
| <b>seq322</b>  | Firmicutes    | Clostridia   | 0                   | 0                    | 0                   | 0                    |
| <b>seq369</b>  | Firmicutes    | Clostridia   | 0                   | 0                    | 0                   | 0                    |
| <b>seq392</b>  | Firmicutes    | Clostridia   | 0                   | 0                    | 0                   | 0                    |
| <b>seq400</b>  | Firmicutes    | Clostridia   | 142                 | 105                  | 0                   | 0                    |
| <b>seq414</b>  | Firmicutes    | Clostridia   | 0                   | 0                    | 0                   | 0                    |
| <b>seq457</b>  | Firmicutes    | Clostridia   | 0                   | 0                    | 0                   | 0                    |
| <b>seq468</b>  | Firmicutes    | Clostridia   | 0                   | 0                    | 0                   | 0                    |

Sequence Count Table

|                | <b>Phylum</b> | <b>Class</b> | <b>Subject25WK0</b> | <b>Subject25WK12</b> | <b>Subject38WK0</b> | <b>Subject38WK12</b> |
|----------------|---------------|--------------|---------------------|----------------------|---------------------|----------------------|
| <b>seq436</b>  | Firmicutes    | Clostridia   | 0                   | 0                    | 0                   | 0                    |
| <b>seq508</b>  | Firmicutes    | Clostridia   | 0                   | 0                    | 0                   | 0                    |
| <b>seq595</b>  | Firmicutes    | Clostridia   | 0                   | 0                    | 0                   | 0                    |
| <b>seq607</b>  | Firmicutes    | Clostridia   | 0                   | 0                    | 0                   | 0                    |
| <b>seq661</b>  | Firmicutes    | Clostridia   | 0                   | 0                    | 0                   | 0                    |
| <b>seq676</b>  | Firmicutes    | Clostridia   | 0                   | 0                    | 0                   | 0                    |
| <b>seq775</b>  | Firmicutes    | Clostridia   | 0                   | 0                    | 0                   | 0                    |
| <b>seq816</b>  | Firmicutes    | Clostridia   | 0                   | 0                    | 0                   | 0                    |
| <b>seq830</b>  | Firmicutes    | Clostridia   | 0                   | 0                    | 0                   | 0                    |
| <b>seq923</b>  | Firmicutes    | Clostridia   | 0                   | 0                    | 0                   | 0                    |
| <b>seq1007</b> | Firmicutes    | Clostridia   | 0                   | 0                    | 0                   | 0                    |
| <b>seq1126</b> | Firmicutes    | Clostridia   | 0                   | 0                    | 0                   | 0                    |
| <b>seq3</b>    | Firmicutes    | Clostridia   | 5527                | 10499                | 91                  | 66                   |
| <b>seq13</b>   | Firmicutes    | Clostridia   | 5093                | 7038                 | 0                   | 0                    |
| <b>seq22</b>   | Firmicutes    | Clostridia   | 1276                | 1264                 | 0                   | 0                    |
| <b>seq30</b>   | Firmicutes    | Clostridia   | 997                 | 262                  | 0                   | 0                    |
| <b>seq107</b>  | Firmicutes    | Clostridia   | 0                   | 0                    | 0                   | 0                    |
| <b>seq124</b>  | Firmicutes    | Clostridia   | 402                 | 380                  | 0                   | 0                    |
| <b>seq157</b>  | Firmicutes    | Clostridia   | 0                   | 0                    | 0                   | 0                    |
| <b>seq201</b>  | Firmicutes    | Clostridia   | 0                   | 0                    | 0                   | 0                    |
| <b>seq218</b>  | Firmicutes    | Clostridia   | 0                   | 0                    | 0                   | 0                    |
| <b>seq223</b>  | Firmicutes    | Clostridia   | 0                   | 0                    | 0                   | 0                    |
| <b>seq234</b>  | Firmicutes    | Clostridia   | 0                   | 0                    | 0                   | 0                    |
| <b>seq260</b>  | Firmicutes    | Clostridia   | 177                 | 58                   | 0                   | 0                    |
| <b>seq267</b>  | Firmicutes    | Clostridia   | 0                   | 0                    | 0                   | 0                    |
| <b>seq322</b>  | Firmicutes    | Clostridia   | 565                 | 640                  | 0                   | 0                    |
| <b>seq369</b>  | Firmicutes    | Clostridia   | 0                   | 0                    | 0                   | 0                    |
| <b>seq392</b>  | Firmicutes    | Clostridia   | 0                   | 0                    | 0                   | 0                    |
| <b>seq400</b>  | Firmicutes    | Clostridia   | 0                   | 0                    | 0                   | 0                    |
| <b>seq414</b>  | Firmicutes    | Clostridia   | 0                   | 0                    | 0                   | 0                    |
| <b>seq457</b>  | Firmicutes    | Clostridia   | 0                   | 0                    | 0                   | 0                    |
| <b>seq468</b>  | Firmicutes    | Clostridia   | 0                   | 0                    | 0                   | 0                    |

Sequence Count Table

|                | <b>Phylum</b> | <b>Class</b> | <b>Subject31WK0</b> | <b>Subject31WK12</b> | <b>Subject32WK0</b> | <b>Subject32WK12</b> |
|----------------|---------------|--------------|---------------------|----------------------|---------------------|----------------------|
| <b>seq436</b>  | Firmicutes    | Clostridia   | 0                   | 0                    | 0                   | 0                    |
| <b>seq508</b>  | Firmicutes    | Clostridia   | 0                   | 0                    | 0                   | 0                    |
| <b>seq595</b>  | Firmicutes    | Clostridia   | 0                   | 0                    | 0                   | 0                    |
| <b>seq607</b>  | Firmicutes    | Clostridia   | 0                   | 0                    | 0                   | 0                    |
| <b>seq661</b>  | Firmicutes    | Clostridia   | 0                   | 0                    | 0                   | 0                    |
| <b>seq676</b>  | Firmicutes    | Clostridia   | 0                   | 0                    | 0                   | 0                    |
| <b>seq775</b>  | Firmicutes    | Clostridia   | 0                   | 0                    | 0                   | 0                    |
| <b>seq816</b>  | Firmicutes    | Clostridia   | 0                   | 0                    | 0                   | 0                    |
| <b>seq830</b>  | Firmicutes    | Clostridia   | 0                   | 0                    | 0                   | 0                    |
| <b>seq923</b>  | Firmicutes    | Clostridia   | 0                   | 0                    | 0                   | 0                    |
| <b>seq1007</b> | Firmicutes    | Clostridia   | 0                   | 0                    | 0                   | 0                    |
| <b>seq1126</b> | Firmicutes    | Clostridia   | 0                   | 0                    | 0                   | 0                    |
| <b>seq3</b>    | Firmicutes    | Clostridia   | 0                   | 0                    | 4705                | 142                  |
| <b>seq13</b>   | Firmicutes    | Clostridia   | 0                   | 0                    | 1556                | 28                   |
| <b>seq22</b>   | Firmicutes    | Clostridia   | 0                   | 0                    | 526                 | 30                   |
| <b>seq30</b>   | Firmicutes    | Clostridia   | 0                   | 0                    | 462                 | 0                    |
| <b>seq107</b>  | Firmicutes    | Clostridia   | 0                   | 0                    | 0                   | 0                    |
| <b>seq124</b>  | Firmicutes    | Clostridia   | 0                   | 0                    | 96                  | 0                    |
| <b>seq157</b>  | Firmicutes    | Clostridia   | 0                   | 0                    | 8                   | 0                    |
| <b>seq201</b>  | Firmicutes    | Clostridia   | 0                   | 0                    | 0                   | 0                    |
| <b>seq218</b>  | Firmicutes    | Clostridia   | 0                   | 0                    | 0                   | 0                    |
| <b>seq223</b>  | Firmicutes    | Clostridia   | 0                   | 0                    | 0                   | 0                    |
| <b>seq234</b>  | Firmicutes    | Clostridia   | 0                   | 0                    | 0                   | 0                    |
| <b>seq260</b>  | Firmicutes    | Clostridia   | 0                   | 0                    | 29                  | 0                    |
| <b>seq267</b>  | Firmicutes    | Clostridia   | 0                   | 0                    | 0                   | 0                    |
| <b>seq322</b>  | Firmicutes    | Clostridia   | 0                   | 0                    | 0                   | 0                    |
| <b>seq369</b>  | Firmicutes    | Clostridia   | 0                   | 0                    | 0                   | 0                    |
| <b>seq392</b>  | Firmicutes    | Clostridia   | 0                   | 0                    | 0                   | 0                    |
| <b>seq400</b>  | Firmicutes    | Clostridia   | 0                   | 0                    | 0                   | 0                    |
| <b>seq414</b>  | Firmicutes    | Clostridia   | 0                   | 0                    | 0                   | 0                    |
| <b>seq457</b>  | Firmicutes    | Clostridia   | 0                   | 0                    | 0                   | 0                    |
| <b>seq468</b>  | Firmicutes    | Clostridia   | 0                   | 0                    | 0                   | 0                    |

Sequence Count Table

|                | <b>Phylum</b> | <b>Class</b> | <b>Subject13WK0</b> | <b>Subject13WK12</b> | <b>Subject39WK0</b> | <b>Subject39WK12</b> |
|----------------|---------------|--------------|---------------------|----------------------|---------------------|----------------------|
| <b>seq436</b>  | Firmicutes    | Clostridia   | 0                   | 0                    | 0                   | 0                    |
| <b>seq508</b>  | Firmicutes    | Clostridia   | 0                   | 0                    | 0                   | 0                    |
| <b>seq595</b>  | Firmicutes    | Clostridia   | 0                   | 0                    | 0                   | 0                    |
| <b>seq607</b>  | Firmicutes    | Clostridia   | 0                   | 0                    | 0                   | 0                    |
| <b>seq661</b>  | Firmicutes    | Clostridia   | 0                   | 0                    | 0                   | 0                    |
| <b>seq676</b>  | Firmicutes    | Clostridia   | 0                   | 0                    | 0                   | 0                    |
| <b>seq775</b>  | Firmicutes    | Clostridia   | 0                   | 0                    | 0                   | 0                    |
| <b>seq816</b>  | Firmicutes    | Clostridia   | 0                   | 0                    | 0                   | 0                    |
| <b>seq830</b>  | Firmicutes    | Clostridia   | 0                   | 0                    | 0                   | 0                    |
| <b>seq923</b>  | Firmicutes    | Clostridia   | 182                 | 0                    | 0                   | 0                    |
| <b>seq1007</b> | Firmicutes    | Clostridia   | 0                   | 0                    | 0                   | 0                    |
| <b>seq1126</b> | Firmicutes    | Clostridia   | 0                   | 0                    | 0                   | 0                    |
| <b>seq3</b>    | Firmicutes    | Clostridia   | 2243                | 3082                 | 62                  | 4883                 |
| <b>seq13</b>   | Firmicutes    | Clostridia   | 1843                | 86                   | 0                   | 591                  |
| <b>seq22</b>   | Firmicutes    | Clostridia   | 1200                | 695                  | 0                   | 215                  |
| <b>seq30</b>   | Firmicutes    | Clostridia   | 522                 | 143                  | 0                   | 789                  |
| <b>seq107</b>  | Firmicutes    | Clostridia   | 17                  | 0                    | 0                   | 0                    |
| <b>seq124</b>  | Firmicutes    | Clostridia   | 238                 | 470                  | 0                   | 73                   |
| <b>seq157</b>  | Firmicutes    | Clostridia   | 0                   | 0                    | 0                   | 0                    |
| <b>seq201</b>  | Firmicutes    | Clostridia   | 0                   | 0                    | 0                   | 540                  |
| <b>seq218</b>  | Firmicutes    | Clostridia   | 0                   | 0                    | 0                   | 0                    |
| <b>seq223</b>  | Firmicutes    | Clostridia   | 0                   | 0                    | 0                   | 0                    |
| <b>seq234</b>  | Firmicutes    | Clostridia   | 0                   | 0                    | 0                   | 0                    |
| <b>seq260</b>  | Firmicutes    | Clostridia   | 0                   | 85                   | 0                   | 17                   |
| <b>seq267</b>  | Firmicutes    | Clostridia   | 0                   | 0                    | 0                   | 0                    |
| <b>seq322</b>  | Firmicutes    | Clostridia   | 0                   | 0                    | 0                   | 0                    |
| <b>seq369</b>  | Firmicutes    | Clostridia   | 0                   | 0                    | 0                   | 410                  |
| <b>seq392</b>  | Firmicutes    | Clostridia   | 0                   | 0                    | 0                   | 0                    |
| <b>seq400</b>  | Firmicutes    | Clostridia   | 0                   | 0                    | 0                   | 0                    |
| <b>seq414</b>  | Firmicutes    | Clostridia   | 0                   | 0                    | 0                   | 0                    |
| <b>seq457</b>  | Firmicutes    | Clostridia   | 0                   | 0                    | 0                   | 0                    |
| <b>seq468</b>  | Firmicutes    | Clostridia   | 0                   | 0                    | 0                   | 0                    |

Sequence Count Table

|                | <b>Phylum</b> | <b>Class</b> | <b>Subject26WK0</b> | <b>Subject26WK12</b> | <b>Subject14WK0</b> | <b>Subject14WK12</b> |
|----------------|---------------|--------------|---------------------|----------------------|---------------------|----------------------|
| <b>seq436</b>  | Firmicutes    | Clostridia   | 27                  | 24                   | 0                   | 0                    |
| <b>seq508</b>  | Firmicutes    | Clostridia   | 0                   | 0                    | 0                   | 0                    |
| <b>seq595</b>  | Firmicutes    | Clostridia   | 0                   | 0                    | 0                   | 0                    |
| <b>seq607</b>  | Firmicutes    | Clostridia   | 0                   | 0                    | 0                   | 0                    |
| <b>seq661</b>  | Firmicutes    | Clostridia   | 0                   | 0                    | 0                   | 0                    |
| <b>seq676</b>  | Firmicutes    | Clostridia   | 0                   | 0                    | 0                   | 0                    |
| <b>seq775</b>  | Firmicutes    | Clostridia   | 0                   | 0                    | 0                   | 0                    |
| <b>seq816</b>  | Firmicutes    | Clostridia   | 0                   | 0                    | 0                   | 0                    |
| <b>seq830</b>  | Firmicutes    | Clostridia   | 0                   | 0                    | 0                   | 0                    |
| <b>seq923</b>  | Firmicutes    | Clostridia   | 0                   | 0                    | 0                   | 0                    |
| <b>seq1007</b> | Firmicutes    | Clostridia   | 0                   | 0                    | 0                   | 0                    |
| <b>seq1126</b> | Firmicutes    | Clostridia   | 0                   | 0                    | 0                   | 0                    |
| <b>seq3</b>    | Firmicutes    | Clostridia   | 2265                | 2947                 | 748                 | 1220                 |
| <b>seq13</b>   | Firmicutes    | Clostridia   | 0                   | 0                    | 412                 | 809                  |
| <b>seq22</b>   | Firmicutes    | Clostridia   | 1756                | 838                  | 1207                | 2427                 |
| <b>seq30</b>   | Firmicutes    | Clostridia   | 4835                | 1352                 | 303                 | 488                  |
| <b>seq107</b>  | Firmicutes    | Clostridia   | 475                 | 434                  | 0                   | 0                    |
| <b>seq124</b>  | Firmicutes    | Clostridia   | 0                   | 0                    | 273                 | 677                  |
| <b>seq157</b>  | Firmicutes    | Clostridia   | 410                 | 385                  | 0                   | 0                    |
| <b>seq201</b>  | Firmicutes    | Clostridia   | 0                   | 0                    | 110                 | 199                  |
| <b>seq218</b>  | Firmicutes    | Clostridia   | 0                   | 0                    | 0                   | 0                    |
| <b>seq223</b>  | Firmicutes    | Clostridia   | 0                   | 0                    | 0                   | 158                  |
| <b>seq234</b>  | Firmicutes    | Clostridia   | 0                   | 0                    | 0                   | 0                    |
| <b>seq260</b>  | Firmicutes    | Clostridia   | 0                   | 0                    | 51                  | 189                  |
| <b>seq267</b>  | Firmicutes    | Clostridia   | 702                 | 407                  | 0                   | 0                    |
| <b>seq322</b>  | Firmicutes    | Clostridia   | 0                   | 0                    | 0                   | 0                    |
| <b>seq369</b>  | Firmicutes    | Clostridia   | 0                   | 0                    | 0                   | 0                    |
| <b>seq392</b>  | Firmicutes    | Clostridia   | 0                   | 0                    | 0                   | 0                    |
| <b>seq400</b>  | Firmicutes    | Clostridia   | 89                  | 59                   | 0                   | 0                    |
| <b>seq414</b>  | Firmicutes    | Clostridia   | 0                   | 0                    | 0                   | 0                    |
| <b>seq457</b>  | Firmicutes    | Clostridia   | 0                   | 0                    | 0                   | 0                    |
| <b>seq468</b>  | Firmicutes    | Clostridia   | 0                   | 0                    | 0                   | 0                    |

Sequence Count Table

|                | <b>Phylum</b> | <b>Class</b> | <b>Subject27WK0</b> | <b>Subject27WK12</b> | <b>Subject15WK0</b> | <b>Subject15WK12</b> |
|----------------|---------------|--------------|---------------------|----------------------|---------------------|----------------------|
| <b>seq436</b>  | Firmicutes    | Clostridia   | 0                   | 0                    | 0                   | 0                    |
| <b>seq508</b>  | Firmicutes    | Clostridia   | 0                   | 0                    | 0                   | 0                    |
| <b>seq595</b>  | Firmicutes    | Clostridia   | 0                   | 0                    | 0                   | 0                    |
| <b>seq607</b>  | Firmicutes    | Clostridia   | 0                   | 0                    | 0                   | 0                    |
| <b>seq661</b>  | Firmicutes    | Clostridia   | 0                   | 0                    | 0                   | 0                    |
| <b>seq676</b>  | Firmicutes    | Clostridia   | 0                   | 0                    | 0                   | 0                    |
| <b>seq775</b>  | Firmicutes    | Clostridia   | 0                   | 0                    | 0                   | 0                    |
| <b>seq816</b>  | Firmicutes    | Clostridia   | 0                   | 0                    | 0                   | 0                    |
| <b>seq830</b>  | Firmicutes    | Clostridia   | 0                   | 0                    | 0                   | 0                    |
| <b>seq923</b>  | Firmicutes    | Clostridia   | 0                   | 0                    | 0                   | 0                    |
| <b>seq1007</b> | Firmicutes    | Clostridia   | 0                   | 0                    | 0                   | 0                    |
| <b>seq1126</b> | Firmicutes    | Clostridia   | 0                   | 0                    | 0                   | 99                   |
| <b>seq3</b>    | Firmicutes    | Clostridia   | 2468                | 2043                 | 4674                | 8603                 |
| <b>seq13</b>   | Firmicutes    | Clostridia   | 1542                | 1679                 | 1367                | 2964                 |
| <b>seq22</b>   | Firmicutes    | Clostridia   | 264                 | 604                  | 1679                | 2586                 |
| <b>seq30</b>   | Firmicutes    | Clostridia   | 222                 | 1266                 | 914                 | 1548                 |
| <b>seq107</b>  | Firmicutes    | Clostridia   | 56                  | 39                   | 0                   | 0                    |
| <b>seq124</b>  | Firmicutes    | Clostridia   | 127                 | 210                  | 215                 | 393                  |
| <b>seq157</b>  | Firmicutes    | Clostridia   | 454                 | 614                  | 0                   | 0                    |
| <b>seq201</b>  | Firmicutes    | Clostridia   | 0                   | 0                    | 0                   | 0                    |
| <b>seq218</b>  | Firmicutes    | Clostridia   | 0                   | 0                    | 0                   | 0                    |
| <b>seq223</b>  | Firmicutes    | Clostridia   | 0                   | 0                    | 0                   | 0                    |
| <b>seq234</b>  | Firmicutes    | Clostridia   | 136                 | 94                   | 52                  | 418                  |
| <b>seq260</b>  | Firmicutes    | Clostridia   | 0                   | 33                   | 0                   | 0                    |
| <b>seq267</b>  | Firmicutes    | Clostridia   | 0                   | 0                    | 0                   | 0                    |
| <b>seq322</b>  | Firmicutes    | Clostridia   | 0                   | 0                    | 113                 | 251                  |
| <b>seq369</b>  | Firmicutes    | Clostridia   | 0                   | 0                    | 445                 | 601                  |
| <b>seq392</b>  | Firmicutes    | Clostridia   | 0                   | 0                    | 0                   | 0                    |
| <b>seq400</b>  | Firmicutes    | Clostridia   | 0                   | 0                    | 0                   | 0                    |
| <b>seq414</b>  | Firmicutes    | Clostridia   | 0                   | 0                    | 0                   | 0                    |
| <b>seq457</b>  | Firmicutes    | Clostridia   | 0                   | 0                    | 0                   | 0                    |
| <b>seq468</b>  | Firmicutes    | Clostridia   | 23                  | 0                    | 0                   | 0                    |

Sequence Count Table

|                | <b>Phylum</b> | <b>Class</b> | <b>Δ</b> |  |  |  |
|----------------|---------------|--------------|----------|--|--|--|
| <b>seq436</b>  | Firmicutes    | Clostridia   |          |  |  |  |
| <b>seq508</b>  | Firmicutes    | Clostridia   |          |  |  |  |
| <b>seq595</b>  | Firmicutes    | Clostridia   |          |  |  |  |
| <b>seq607</b>  | Firmicutes    | Clostridia   |          |  |  |  |
| <b>seq661</b>  | Firmicutes    | Clostridia   |          |  |  |  |
| <b>seq676</b>  | Firmicutes    | Clostridia   |          |  |  |  |
| <b>seq775</b>  | Firmicutes    | Clostridia   |          |  |  |  |
| <b>seq816</b>  | Firmicutes    | Clostridia   |          |  |  |  |
| <b>seq830</b>  | Firmicutes    | Clostridia   |          |  |  |  |
| <b>seq923</b>  | Firmicutes    | Clostridia   |          |  |  |  |
| <b>seq1007</b> | Firmicutes    | Clostridia   |          |  |  |  |
| <b>seq1126</b> | Firmicutes    | Clostridia   |          |  |  |  |
| <b>seq3</b>    | Firmicutes    | Clostridia   |          |  |  |  |
| <b>seq13</b>   | Firmicutes    | Clostridia   |          |  |  |  |
| <b>seq22</b>   | Firmicutes    | Clostridia   |          |  |  |  |
| <b>seq30</b>   | Firmicutes    | Clostridia   |          |  |  |  |
| <b>seq107</b>  | Firmicutes    | Clostridia   |          |  |  |  |
| <b>seq124</b>  | Firmicutes    | Clostridia   |          |  |  |  |
| <b>seq157</b>  | Firmicutes    | Clostridia   |          |  |  |  |
| <b>seq201</b>  | Firmicutes    | Clostridia   |          |  |  |  |
| <b>seq218</b>  | Firmicutes    | Clostridia   |          |  |  |  |
| <b>seq223</b>  | Firmicutes    | Clostridia   |          |  |  |  |
| <b>seq234</b>  | Firmicutes    | Clostridia   |          |  |  |  |
| <b>seq260</b>  | Firmicutes    | Clostridia   |          |  |  |  |
| <b>seq267</b>  | Firmicutes    | Clostridia   |          |  |  |  |
| <b>seq322</b>  | Firmicutes    | Clostridia   |          |  |  |  |
| <b>seq369</b>  | Firmicutes    | Clostridia   |          |  |  |  |
| <b>seq392</b>  | Firmicutes    | Clostridia   |          |  |  |  |
| <b>seq400</b>  | Firmicutes    | Clostridia   |          |  |  |  |
| <b>seq414</b>  | Firmicutes    | Clostridia   |          |  |  |  |
| <b>seq457</b>  | Firmicutes    | Clostridia   |          |  |  |  |
| <b>seq468</b>  | Firmicutes    | Clostridia   |          |  |  |  |

Sequence Count Table

|                | <b>Phylum</b> | <b>Class</b> | <b>Order</b>  | <b>Family</b>   |
|----------------|---------------|--------------|---------------|-----------------|
| <b>seq479</b>  | Firmicutes    | Clostridia   | Clostridiales | Lachnospiraceae |
| <b>seq489</b>  | Firmicutes    | Clostridia   | Clostridiales | Lachnospiraceae |
| <b>seq516</b>  | Firmicutes    | Clostridia   | Clostridiales | Lachnospiraceae |
| <b>seq551</b>  | Firmicutes    | Clostridia   | Clostridiales | Lachnospiraceae |
| <b>seq555</b>  | Firmicutes    | Clostridia   | Clostridiales | Lachnospiraceae |
| <b>seq557</b>  | Firmicutes    | Clostridia   | Clostridiales | Lachnospiraceae |
| <b>seq581</b>  | Firmicutes    | Clostridia   | Clostridiales | Lachnospiraceae |
| <b>seq586</b>  | Firmicutes    | Clostridia   | Clostridiales | Lachnospiraceae |
| <b>seq604</b>  | Firmicutes    | Clostridia   | Clostridiales | Lachnospiraceae |
| <b>seq637</b>  | Firmicutes    | Clostridia   | Clostridiales | Lachnospiraceae |
| <b>seq693</b>  | Firmicutes    | Clostridia   | Clostridiales | Lachnospiraceae |
| <b>seq705</b>  | Firmicutes    | Clostridia   | Clostridiales | Lachnospiraceae |
| <b>seq726</b>  | Firmicutes    | Clostridia   | Clostridiales | Lachnospiraceae |
| <b>seq760</b>  | Firmicutes    | Clostridia   | Clostridiales | Lachnospiraceae |
| <b>seq795</b>  | Firmicutes    | Clostridia   | Clostridiales | Lachnospiraceae |
| <b>seq809</b>  | Firmicutes    | Clostridia   | Clostridiales | Lachnospiraceae |
| <b>seq995</b>  | Firmicutes    | Clostridia   | Clostridiales | Lachnospiraceae |
| <b>seq1002</b> | Firmicutes    | Clostridia   | Clostridiales | Lachnospiraceae |
| <b>seq1239</b> | Firmicutes    | Clostridia   | Clostridiales | Lachnospiraceae |
| <b>seq1384</b> | Firmicutes    | Clostridia   | Clostridiales | Lachnospiraceae |
| <b>seq1461</b> | Firmicutes    | Clostridia   | Clostridiales | Lachnospiraceae |
| <b>seq1508</b> | Firmicutes    | Clostridia   | Clostridiales | Lachnospiraceae |
| <b>seq1577</b> | Firmicutes    | Clostridia   | Clostridiales | Lachnospiraceae |
| <b>seq92</b>   | Firmicutes    | Clostridia   | Clostridiales | Lachnospiraceae |
| <b>seq1012</b> | Firmicutes    | Clostridia   | Clostridiales | Lachnospiraceae |
| <b>seq121</b>  | Firmicutes    | Clostridia   | Clostridiales | Lachnospiraceae |
| <b>seq1311</b> | Firmicutes    | Clostridia   | Clostridiales | Lachnospiraceae |
| <b>seq1780</b> | Firmicutes    | Clostridia   | Clostridiales | Lachnospiraceae |
| <b>seq88</b>   | Firmicutes    | Clostridia   | Clostridiales | Lachnospiraceae |
| <b>seq187</b>  | Firmicutes    | Clostridia   | Clostridiales | Lachnospiraceae |
| <b>seq264</b>  | Firmicutes    | Clostridia   | Clostridiales | Lachnospiraceae |
| <b>seq454</b>  | Firmicutes    | Clostridia   | Clostridiales | Lachnospiraceae |



Sequence Count Table

|                | <b>Phylum</b> | <b>Class</b> | <b>Genus</b>  | <b>Species</b> |
|----------------|---------------|--------------|---------------|----------------|
| <b>seq479</b>  | Firmicutes    | Clostridia   | Blautia       |                |
| <b>seq489</b>  | Firmicutes    | Clostridia   | Blautia       |                |
| <b>seq516</b>  | Firmicutes    | Clostridia   | Blautia       |                |
| <b>seq551</b>  | Firmicutes    | Clostridia   | Blautia       | glucerasea     |
| <b>seq555</b>  | Firmicutes    | Clostridia   | Blautia       |                |
| <b>seq557</b>  | Firmicutes    | Clostridia   | Blautia       |                |
| <b>seq581</b>  | Firmicutes    | Clostridia   | Blautia       |                |
| <b>seq586</b>  | Firmicutes    | Clostridia   | Blautia       |                |
| <b>seq604</b>  | Firmicutes    | Clostridia   | Blautia       |                |
| <b>seq637</b>  | Firmicutes    | Clostridia   | Blautia       |                |
| <b>seq693</b>  | Firmicutes    | Clostridia   | Blautia       |                |
| <b>seq705</b>  | Firmicutes    | Clostridia   | Blautia       |                |
| <b>seq726</b>  | Firmicutes    | Clostridia   | Blautia       |                |
| <b>seq760</b>  | Firmicutes    | Clostridia   | Blautia       |                |
| <b>seq795</b>  | Firmicutes    | Clostridia   | Blautia       | glucerasea     |
| <b>seq809</b>  | Firmicutes    | Clostridia   | Blautia       |                |
| <b>seq995</b>  | Firmicutes    | Clostridia   | Blautia       |                |
| <b>seq1002</b> | Firmicutes    | Clostridia   | Blautia       |                |
| <b>seq1239</b> | Firmicutes    | Clostridia   | Blautia       |                |
| <b>seq1384</b> | Firmicutes    | Clostridia   | Blautia       | coccoides      |
| <b>seq1461</b> | Firmicutes    | Clostridia   | Blautia       |                |
| <b>seq1508</b> | Firmicutes    | Clostridia   | Blautia       |                |
| <b>seq1577</b> | Firmicutes    | Clostridia   | Blautia       |                |
| <b>seq92</b>   | Firmicutes    | Clostridia   | CAG-56        |                |
| <b>seq1012</b> | Firmicutes    | Clostridia   | CAG-56        |                |
| <b>seq121</b>  | Firmicutes    | Clostridia   | Coprococcus_1 | catus          |
| <b>seq1311</b> | Firmicutes    | Clostridia   | Coprococcus_1 |                |
| <b>seq1780</b> | Firmicutes    | Clostridia   | Coprococcus_1 |                |
| <b>seq88</b>   | Firmicutes    | Clostridia   | Coprococcus_2 | eutactus       |
| <b>seq187</b>  | Firmicutes    | Clostridia   | Coprococcus_2 |                |
| <b>seq264</b>  | Firmicutes    | Clostridia   | Coprococcus_2 | eutactus       |
| <b>seq454</b>  | Firmicutes    | Clostridia   | Coprococcus_2 |                |

Sequence Count Table

|                | <b>Phylum</b> | <b>Class</b> | <b>Subject34WK0</b> | <b>Subject34WK12</b> | <b>Subject16WK0</b> | <b>Subject16WK12</b> |
|----------------|---------------|--------------|---------------------|----------------------|---------------------|----------------------|
| <b>seq479</b>  | Firmicutes    | Clostridia   | 0                   | 36                   | 0                   | 0                    |
| <b>seq489</b>  | Firmicutes    | Clostridia   | 0                   | 0                    | 0                   | 0                    |
| <b>seq516</b>  | Firmicutes    | Clostridia   | 0                   | 0                    | 0                   | 0                    |
| <b>seq551</b>  | Firmicutes    | Clostridia   | 0                   | 0                    | 0                   | 0                    |
| <b>seq555</b>  | Firmicutes    | Clostridia   | 0                   | 0                    | 0                   | 0                    |
| <b>seq557</b>  | Firmicutes    | Clostridia   | 0                   | 0                    | 0                   | 0                    |
| <b>seq581</b>  | Firmicutes    | Clostridia   | 0                   | 0                    | 37                  | 10                   |
| <b>seq586</b>  | Firmicutes    | Clostridia   | 0                   | 0                    | 0                   | 0                    |
| <b>seq604</b>  | Firmicutes    | Clostridia   | 0                   | 0                    | 0                   | 0                    |
| <b>seq637</b>  | Firmicutes    | Clostridia   | 0                   | 0                    | 0                   | 0                    |
| <b>seq693</b>  | Firmicutes    | Clostridia   | 0                   | 0                    | 0                   | 0                    |
| <b>seq705</b>  | Firmicutes    | Clostridia   | 0                   | 0                    | 0                   | 0                    |
| <b>seq726</b>  | Firmicutes    | Clostridia   | 0                   | 0                    | 0                   | 0                    |
| <b>seq760</b>  | Firmicutes    | Clostridia   | 0                   | 0                    | 0                   | 0                    |
| <b>seq795</b>  | Firmicutes    | Clostridia   | 0                   | 0                    | 0                   | 0                    |
| <b>seq809</b>  | Firmicutes    | Clostridia   | 0                   | 0                    | 0                   | 0                    |
| <b>seq995</b>  | Firmicutes    | Clostridia   | 0                   | 0                    | 0                   | 0                    |
| <b>seq1002</b> | Firmicutes    | Clostridia   | 0                   | 0                    | 0                   | 0                    |
| <b>seq1239</b> | Firmicutes    | Clostridia   | 0                   | 0                    | 0                   | 0                    |
| <b>seq1384</b> | Firmicutes    | Clostridia   | 0                   | 0                    | 0                   | 0                    |
| <b>seq1461</b> | Firmicutes    | Clostridia   | 0                   | 0                    | 0                   | 0                    |
| <b>seq1508</b> | Firmicutes    | Clostridia   | 0                   | 0                    | 0                   | 0                    |
| <b>seq1577</b> | Firmicutes    | Clostridia   | 0                   | 0                    | 0                   | 0                    |
| <b>seq92</b>   | Firmicutes    | Clostridia   | 61                  | 1501                 | 244                 | 89                   |
| <b>seq1012</b> | Firmicutes    | Clostridia   | 0                   | 0                    | 138                 | 0                    |
| <b>seq121</b>  | Firmicutes    | Clostridia   | 0                   | 209                  | 212                 | 249                  |
| <b>seq1311</b> | Firmicutes    | Clostridia   | 0                   | 0                    | 0                   | 0                    |
| <b>seq1780</b> | Firmicutes    | Clostridia   | 0                   | 0                    | 0                   | 0                    |
| <b>seq88</b>   | Firmicutes    | Clostridia   | 0                   | 0                    | 1170                | 1012                 |
| <b>seq187</b>  | Firmicutes    | Clostridia   | 0                   | 0                    | 0                   | 0                    |
| <b>seq264</b>  | Firmicutes    | Clostridia   | 0                   | 0                    | 0                   | 0                    |
| <b>seq454</b>  | Firmicutes    | Clostridia   | 0                   | 0                    | 0                   | 0                    |

Sequence Count Table

|                | <b>Phylum</b> | <b>Class</b> | <b>Subject17WK0</b> | <b>Subject17WK12</b> | <b>Subject1WK0</b> | <b>Subject1WK12</b> |
|----------------|---------------|--------------|---------------------|----------------------|--------------------|---------------------|
| <b>seq479</b>  | Firmicutes    | Clostridia   | 0                   | 0                    | 0                  | 0                   |
| <b>seq489</b>  | Firmicutes    | Clostridia   | 0                   | 0                    | 0                  | 0                   |
| <b>seq516</b>  | Firmicutes    | Clostridia   | 0                   | 0                    | 0                  | 0                   |
| <b>seq551</b>  | Firmicutes    | Clostridia   | 0                   | 0                    | 0                  | 0                   |
| <b>seq555</b>  | Firmicutes    | Clostridia   | 0                   | 0                    | 0                  | 0                   |
| <b>seq557</b>  | Firmicutes    | Clostridia   | 0                   | 0                    | 0                  | 0                   |
| <b>seq581</b>  | Firmicutes    | Clostridia   | 0                   | 0                    | 0                  | 0                   |
| <b>seq586</b>  | Firmicutes    | Clostridia   | 0                   | 0                    | 0                  | 0                   |
| <b>seq604</b>  | Firmicutes    | Clostridia   | 0                   | 0                    | 0                  | 0                   |
| <b>seq637</b>  | Firmicutes    | Clostridia   | 0                   | 0                    | 0                  | 0                   |
| <b>seq693</b>  | Firmicutes    | Clostridia   | 0                   | 0                    | 0                  | 0                   |
| <b>seq705</b>  | Firmicutes    | Clostridia   | 0                   | 0                    | 0                  | 0                   |
| <b>seq726</b>  | Firmicutes    | Clostridia   | 0                   | 0                    | 0                  | 0                   |
| <b>seq760</b>  | Firmicutes    | Clostridia   | 0                   | 0                    | 0                  | 0                   |
| <b>seq795</b>  | Firmicutes    | Clostridia   | 0                   | 0                    | 0                  | 0                   |
| <b>seq809</b>  | Firmicutes    | Clostridia   | 0                   | 0                    | 0                  | 0                   |
| <b>seq995</b>  | Firmicutes    | Clostridia   | 0                   | 0                    | 0                  | 0                   |
| <b>seq1002</b> | Firmicutes    | Clostridia   | 0                   | 0                    | 0                  | 0                   |
| <b>seq1239</b> | Firmicutes    | Clostridia   | 0                   | 0                    | 0                  | 0                   |
| <b>seq1384</b> | Firmicutes    | Clostridia   | 0                   | 0                    | 0                  | 0                   |
| <b>seq1461</b> | Firmicutes    | Clostridia   | 0                   | 0                    | 0                  | 0                   |
| <b>seq1508</b> | Firmicutes    | Clostridia   | 0                   | 0                    | 0                  | 0                   |
| <b>seq1577</b> | Firmicutes    | Clostridia   | 0                   | 0                    | 11                 | 10                  |
| <b>seq92</b>   | Firmicutes    | Clostridia   | 38                  | 158                  | 0                  | 0                   |
| <b>seq1012</b> | Firmicutes    | Clostridia   | 0                   | 0                    | 0                  | 0                   |
| <b>seq121</b>  | Firmicutes    | Clostridia   | 182                 | 974                  | 112                | 98                  |
| <b>seq1311</b> | Firmicutes    | Clostridia   | 0                   | 0                    | 0                  | 0                   |
| <b>seq1780</b> | Firmicutes    | Clostridia   | 0                   | 0                    | 0                  | 0                   |
| <b>seq88</b>   | Firmicutes    | Clostridia   | 0                   | 0                    | 0                  | 0                   |
| <b>seq187</b>  | Firmicutes    | Clostridia   | 0                   | 0                    | 0                  | 0                   |
| <b>seq264</b>  | Firmicutes    | Clostridia   | 0                   | 0                    | 0                  | 0                   |
| <b>seq454</b>  | Firmicutes    | Clostridia   | 0                   | 0                    | 0                  | 0                   |

Sequence Count Table

|                | <b>Phylum</b> | <b>Class</b> | <b>Subject2WK0</b> | <b>Subject2WK12</b> | <b>Subject3WK0</b> | <b>Subject3WK12</b> |
|----------------|---------------|--------------|--------------------|---------------------|--------------------|---------------------|
| <b>seq479</b>  | Firmicutes    | Clostridia   | 0                  | 0                   | 0                  | 0                   |
| <b>seq489</b>  | Firmicutes    | Clostridia   | 0                  | 0                   | 0                  | 0                   |
| <b>seq516</b>  | Firmicutes    | Clostridia   | 0                  | 0                   | 0                  | 0                   |
| <b>seq551</b>  | Firmicutes    | Clostridia   | 0                  | 0                   | 0                  | 0                   |
| <b>seq555</b>  | Firmicutes    | Clostridia   | 0                  | 0                   | 0                  | 0                   |
| <b>seq557</b>  | Firmicutes    | Clostridia   | 0                  | 0                   | 0                  | 0                   |
| <b>seq581</b>  | Firmicutes    | Clostridia   | 0                  | 0                   | 0                  | 0                   |
| <b>seq586</b>  | Firmicutes    | Clostridia   | 0                  | 0                   | 0                  | 0                   |
| <b>seq604</b>  | Firmicutes    | Clostridia   | 0                  | 0                   | 0                  | 0                   |
| <b>seq637</b>  | Firmicutes    | Clostridia   | 0                  | 0                   | 0                  | 0                   |
| <b>seq693</b>  | Firmicutes    | Clostridia   | 0                  | 0                   | 0                  | 0                   |
| <b>seq705</b>  | Firmicutes    | Clostridia   | 0                  | 0                   | 0                  | 0                   |
| <b>seq726</b>  | Firmicutes    | Clostridia   | 0                  | 0                   | 94                 | 249                 |
| <b>seq760</b>  | Firmicutes    | Clostridia   | 0                  | 0                   | 0                  | 0                   |
| <b>seq795</b>  | Firmicutes    | Clostridia   | 0                  | 0                   | 0                  | 0                   |
| <b>seq809</b>  | Firmicutes    | Clostridia   | 0                  | 0                   | 0                  | 0                   |
| <b>seq995</b>  | Firmicutes    | Clostridia   | 0                  | 0                   | 0                  | 144                 |
| <b>seq1002</b> | Firmicutes    | Clostridia   | 0                  | 0                   | 0                  | 0                   |
| <b>seq1239</b> | Firmicutes    | Clostridia   | 0                  | 0                   | 0                  | 0                   |
| <b>seq1384</b> | Firmicutes    | Clostridia   | 15                 | 28                  | 0                  | 0                   |
| <b>seq1461</b> | Firmicutes    | Clostridia   | 0                  | 0                   | 0                  | 0                   |
| <b>seq1508</b> | Firmicutes    | Clostridia   | 0                  | 0                   | 0                  | 0                   |
| <b>seq1577</b> | Firmicutes    | Clostridia   | 0                  | 0                   | 0                  | 0                   |
| <b>seq92</b>   | Firmicutes    | Clostridia   | 1019               | 2327                | 0                  | 0                   |
| <b>seq1012</b> | Firmicutes    | Clostridia   | 0                  | 0                   | 0                  | 0                   |
| <b>seq121</b>  | Firmicutes    | Clostridia   | 405                | 471                 | 0                  | 0                   |
| <b>seq1311</b> | Firmicutes    | Clostridia   | 0                  | 54                  | 0                  | 0                   |
| <b>seq1780</b> | Firmicutes    | Clostridia   | 0                  | 0                   | 0                  | 0                   |
| <b>seq88</b>   | Firmicutes    | Clostridia   | 0                  | 0                   | 0                  | 0                   |
| <b>seq187</b>  | Firmicutes    | Clostridia   | 0                  | 0                   | 0                  | 0                   |
| <b>seq264</b>  | Firmicutes    | Clostridia   | 0                  | 0                   | 0                  | 0                   |
| <b>seq454</b>  | Firmicutes    | Clostridia   | 0                  | 0                   | 0                  | 0                   |

Sequence Count Table

|                | <b>Phylum</b> | <b>Class</b> | <b>Subject4WK0</b> | <b>Subject4WK12</b> | <b>Subject5WK0</b> | <b>Subject5WK12</b> |
|----------------|---------------|--------------|--------------------|---------------------|--------------------|---------------------|
| <b>seq479</b>  | Firmicutes    | Clostridia   | 0                  | 0                   | 0                  | 0                   |
| <b>seq489</b>  | Firmicutes    | Clostridia   | 0                  | 0                   | 0                  | 0                   |
| <b>seq516</b>  | Firmicutes    | Clostridia   | 0                  | 0                   | 170                | 149                 |
| <b>seq551</b>  | Firmicutes    | Clostridia   | 0                  | 19                  | 0                  | 0                   |
| <b>seq555</b>  | Firmicutes    | Clostridia   | 0                  | 0                   | 0                  | 0                   |
| <b>seq557</b>  | Firmicutes    | Clostridia   | 0                  | 0                   | 0                  | 0                   |
| <b>seq581</b>  | Firmicutes    | Clostridia   | 0                  | 0                   | 0                  | 0                   |
| <b>seq586</b>  | Firmicutes    | Clostridia   | 0                  | 0                   | 0                  | 0                   |
| <b>seq604</b>  | Firmicutes    | Clostridia   | 0                  | 0                   | 0                  | 0                   |
| <b>seq637</b>  | Firmicutes    | Clostridia   | 0                  | 0                   | 0                  | 0                   |
| <b>seq693</b>  | Firmicutes    | Clostridia   | 0                  | 0                   | 0                  | 187                 |
| <b>seq705</b>  | Firmicutes    | Clostridia   | 0                  | 0                   | 0                  | 0                   |
| <b>seq726</b>  | Firmicutes    | Clostridia   | 0                  | 0                   | 0                  | 0                   |
| <b>seq760</b>  | Firmicutes    | Clostridia   | 0                  | 0                   | 0                  | 0                   |
| <b>seq795</b>  | Firmicutes    | Clostridia   | 0                  | 0                   | 0                  | 0                   |
| <b>seq809</b>  | Firmicutes    | Clostridia   | 0                  | 122                 | 0                  | 0                   |
| <b>seq995</b>  | Firmicutes    | Clostridia   | 0                  | 0                   | 0                  | 0                   |
| <b>seq1002</b> | Firmicutes    | Clostridia   | 0                  | 0                   | 0                  | 0                   |
| <b>seq1239</b> | Firmicutes    | Clostridia   | 0                  | 0                   | 0                  | 0                   |
| <b>seq1384</b> | Firmicutes    | Clostridia   | 0                  | 0                   | 0                  | 0                   |
| <b>seq1461</b> | Firmicutes    | Clostridia   | 0                  | 0                   | 0                  | 0                   |
| <b>seq1508</b> | Firmicutes    | Clostridia   | 0                  | 0                   | 0                  | 0                   |
| <b>seq1577</b> | Firmicutes    | Clostridia   | 0                  | 0                   | 0                  | 0                   |
| <b>seq92</b>   | Firmicutes    | Clostridia   | 183                | 554                 | 0                  | 0                   |
| <b>seq1012</b> | Firmicutes    | Clostridia   | 0                  | 0                   | 0                  | 0                   |
| <b>seq121</b>  | Firmicutes    | Clostridia   | 473                | 232                 | 0                  | 0                   |
| <b>seq1311</b> | Firmicutes    | Clostridia   | 0                  | 0                   | 0                  | 0                   |
| <b>seq1780</b> | Firmicutes    | Clostridia   | 0                  | 0                   | 0                  | 0                   |
| <b>seq88</b>   | Firmicutes    | Clostridia   | 0                  | 0                   | 0                  | 0                   |
| <b>seq187</b>  | Firmicutes    | Clostridia   | 0                  | 0                   | 0                  | 0                   |
| <b>seq264</b>  | Firmicutes    | Clostridia   | 0                  | 0                   | 0                  | 0                   |
| <b>seq454</b>  | Firmicutes    | Clostridia   | 0                  | 0                   | 0                  | 0                   |

Sequence Count Table

|                | <b>Phylum</b> | <b>Class</b> | <b>Subject6WK0</b> | <b>Subject6WK12</b> | <b>Subject18WK0</b> | <b>Subject18WK12</b> |
|----------------|---------------|--------------|--------------------|---------------------|---------------------|----------------------|
| <b>seq479</b>  | Firmicutes    | Clostridia   | 0                  | 0                   | 0                   | 0                    |
| <b>seq489</b>  | Firmicutes    | Clostridia   | 0                  | 0                   | 0                   | 0                    |
| <b>seq516</b>  | Firmicutes    | Clostridia   | 0                  | 0                   | 0                   | 0                    |
| <b>seq551</b>  | Firmicutes    | Clostridia   | 0                  | 0                   | 159                 | 57                   |
| <b>seq555</b>  | Firmicutes    | Clostridia   | 307                | 321                 | 0                   | 0                    |
| <b>seq557</b>  | Firmicutes    | Clostridia   | 0                  | 0                   | 0                   | 0                    |
| <b>seq581</b>  | Firmicutes    | Clostridia   | 302                | 136                 | 0                   | 0                    |
| <b>seq586</b>  | Firmicutes    | Clostridia   | 0                  | 256                 | 0                   | 0                    |
| <b>seq604</b>  | Firmicutes    | Clostridia   | 0                  | 0                   | 0                   | 0                    |
| <b>seq637</b>  | Firmicutes    | Clostridia   | 0                  | 0                   | 0                   | 0                    |
| <b>seq693</b>  | Firmicutes    | Clostridia   | 0                  | 0                   | 0                   | 0                    |
| <b>seq705</b>  | Firmicutes    | Clostridia   | 0                  | 0                   | 0                   | 0                    |
| <b>seq726</b>  | Firmicutes    | Clostridia   | 0                  | 0                   | 0                   | 0                    |
| <b>seq760</b>  | Firmicutes    | Clostridia   | 0                  | 0                   | 0                   | 0                    |
| <b>seq795</b>  | Firmicutes    | Clostridia   | 0                  | 0                   | 0                   | 0                    |
| <b>seq809</b>  | Firmicutes    | Clostridia   | 0                  | 0                   | 0                   | 0                    |
| <b>seq995</b>  | Firmicutes    | Clostridia   | 0                  | 0                   | 0                   | 0                    |
| <b>seq1002</b> | Firmicutes    | Clostridia   | 0                  | 0                   | 0                   | 0                    |
| <b>seq1239</b> | Firmicutes    | Clostridia   | 0                  | 0                   | 0                   | 0                    |
| <b>seq1384</b> | Firmicutes    | Clostridia   | 0                  | 0                   | 0                   | 0                    |
| <b>seq1461</b> | Firmicutes    | Clostridia   | 0                  | 0                   | 0                   | 0                    |
| <b>seq1508</b> | Firmicutes    | Clostridia   | 0                  | 0                   | 0                   | 0                    |
| <b>seq1577</b> | Firmicutes    | Clostridia   | 0                  | 0                   | 0                   | 0                    |
| <b>seq92</b>   | Firmicutes    | Clostridia   | 48                 | 570                 | 0                   | 0                    |
| <b>seq1012</b> | Firmicutes    | Clostridia   | 0                  | 0                   | 0                   | 0                    |
| <b>seq121</b>  | Firmicutes    | Clostridia   | 301                | 467                 | 313                 | 122                  |
| <b>seq1311</b> | Firmicutes    | Clostridia   | 0                  | 0                   | 0                   | 0                    |
| <b>seq1780</b> | Firmicutes    | Clostridia   | 0                  | 0                   | 0                   | 0                    |
| <b>seq88</b>   | Firmicutes    | Clostridia   | 99                 | 188                 | 0                   | 0                    |
| <b>seq187</b>  | Firmicutes    | Clostridia   | 901                | 247                 | 0                   | 0                    |
| <b>seq264</b>  | Firmicutes    | Clostridia   | 0                  | 0                   | 0                   | 0                    |
| <b>seq454</b>  | Firmicutes    | Clostridia   | 0                  | 0                   | 0                   | 0                    |

Sequence Count Table

|                | <b>Phylum</b> | <b>Class</b> | <b>Subject19WK0</b> | <b>Subject19WK12</b> | <b>Subject20WK0</b> | <b>Subject20WK12</b> |
|----------------|---------------|--------------|---------------------|----------------------|---------------------|----------------------|
| <b>seq479</b>  | Firmicutes    | Clostridia   | 0                   | 0                    | 0                   | 0                    |
| <b>seq489</b>  | Firmicutes    | Clostridia   | 0                   | 0                    | 0                   | 0                    |
| <b>seq516</b>  | Firmicutes    | Clostridia   | 0                   | 0                    | 0                   | 0                    |
| <b>seq551</b>  | Firmicutes    | Clostridia   | 0                   | 0                    | 0                   | 0                    |
| <b>seq555</b>  | Firmicutes    | Clostridia   | 0                   | 0                    | 0                   | 0                    |
| <b>seq557</b>  | Firmicutes    | Clostridia   | 0                   | 0                    | 0                   | 0                    |
| <b>seq581</b>  | Firmicutes    | Clostridia   | 0                   | 0                    | 0                   | 34                   |
| <b>seq586</b>  | Firmicutes    | Clostridia   | 0                   | 0                    | 0                   | 0                    |
| <b>seq604</b>  | Firmicutes    | Clostridia   | 0                   | 0                    | 0                   | 0                    |
| <b>seq637</b>  | Firmicutes    | Clostridia   | 0                   | 0                    | 0                   | 0                    |
| <b>seq693</b>  | Firmicutes    | Clostridia   | 0                   | 0                    | 0                   | 0                    |
| <b>seq705</b>  | Firmicutes    | Clostridia   | 0                   | 0                    | 0                   | 0                    |
| <b>seq726</b>  | Firmicutes    | Clostridia   | 0                   | 0                    | 0                   | 0                    |
| <b>seq760</b>  | Firmicutes    | Clostridia   | 0                   | 0                    | 0                   | 0                    |
| <b>seq795</b>  | Firmicutes    | Clostridia   | 0                   | 0                    | 0                   | 0                    |
| <b>seq809</b>  | Firmicutes    | Clostridia   | 0                   | 0                    | 0                   | 0                    |
| <b>seq995</b>  | Firmicutes    | Clostridia   | 0                   | 0                    | 0                   | 0                    |
| <b>seq1002</b> | Firmicutes    | Clostridia   | 0                   | 0                    | 0                   | 0                    |
| <b>seq1239</b> | Firmicutes    | Clostridia   | 0                   | 0                    | 0                   | 0                    |
| <b>seq1384</b> | Firmicutes    | Clostridia   | 0                   | 0                    | 0                   | 0                    |
| <b>seq1461</b> | Firmicutes    | Clostridia   | 0                   | 0                    | 0                   | 0                    |
| <b>seq1508</b> | Firmicutes    | Clostridia   | 0                   | 0                    | 0                   | 0                    |
| <b>seq1577</b> | Firmicutes    | Clostridia   | 0                   | 0                    | 0                   | 0                    |
| <b>seq92</b>   | Firmicutes    | Clostridia   | 0                   | 0                    | 236                 | 554                  |
| <b>seq1012</b> | Firmicutes    | Clostridia   | 0                   | 0                    | 0                   | 0                    |
| <b>seq121</b>  | Firmicutes    | Clostridia   | 0                   | 0                    | 369                 | 474                  |
| <b>seq1311</b> | Firmicutes    | Clostridia   | 0                   | 0                    | 0                   | 0                    |
| <b>seq1780</b> | Firmicutes    | Clostridia   | 0                   | 0                    | 0                   | 0                    |
| <b>seq88</b>   | Firmicutes    | Clostridia   | 0                   | 0                    | 0                   | 0                    |
| <b>seq187</b>  | Firmicutes    | Clostridia   | 0                   | 0                    | 838                 | 293                  |
| <b>seq264</b>  | Firmicutes    | Clostridia   | 0                   | 0                    | 168                 | 2615                 |
| <b>seq454</b>  | Firmicutes    | Clostridia   | 0                   | 0                    | 734                 | 230                  |

Sequence Count Table

|                | <b>Phylum</b> | <b>Class</b> | <b>Subject7WK0</b> | <b>Subject7WK12</b> | <b>Subject21WK0</b> | <b>Subject21WK12</b> |
|----------------|---------------|--------------|--------------------|---------------------|---------------------|----------------------|
| <b>seq479</b>  | Firmicutes    | Clostridia   | 0                  | 0                   | 0                   | 0                    |
| <b>seq489</b>  | Firmicutes    | Clostridia   | 0                  | 0                   | 0                   | 0                    |
| <b>seq516</b>  | Firmicutes    | Clostridia   | 0                  | 0                   | 0                   | 0                    |
| <b>seq551</b>  | Firmicutes    | Clostridia   | 40                 | 94                  | 0                   | 0                    |
| <b>seq555</b>  | Firmicutes    | Clostridia   | 0                  | 0                   | 0                   | 0                    |
| <b>seq557</b>  | Firmicutes    | Clostridia   | 0                  | 0                   | 0                   | 0                    |
| <b>seq581</b>  | Firmicutes    | Clostridia   | 0                  | 0                   | 0                   | 0                    |
| <b>seq586</b>  | Firmicutes    | Clostridia   | 0                  | 0                   | 0                   | 0                    |
| <b>seq604</b>  | Firmicutes    | Clostridia   | 0                  | 0                   | 121                 | 0                    |
| <b>seq637</b>  | Firmicutes    | Clostridia   | 0                  | 0                   | 0                   | 0                    |
| <b>seq693</b>  | Firmicutes    | Clostridia   | 0                  | 0                   | 0                   | 0                    |
| <b>seq705</b>  | Firmicutes    | Clostridia   | 0                  | 0                   | 0                   | 0                    |
| <b>seq726</b>  | Firmicutes    | Clostridia   | 0                  | 0                   | 0                   | 0                    |
| <b>seq760</b>  | Firmicutes    | Clostridia   | 0                  | 0                   | 0                   | 0                    |
| <b>seq795</b>  | Firmicutes    | Clostridia   | 0                  | 0                   | 0                   | 0                    |
| <b>seq809</b>  | Firmicutes    | Clostridia   | 0                  | 0                   | 0                   | 0                    |
| <b>seq995</b>  | Firmicutes    | Clostridia   | 0                  | 0                   | 0                   | 0                    |
| <b>seq1002</b> | Firmicutes    | Clostridia   | 0                  | 0                   | 0                   | 0                    |
| <b>seq1239</b> | Firmicutes    | Clostridia   | 0                  | 0                   | 0                   | 0                    |
| <b>seq1384</b> | Firmicutes    | Clostridia   | 0                  | 0                   | 0                   | 0                    |
| <b>seq1461</b> | Firmicutes    | Clostridia   | 0                  | 0                   | 0                   | 0                    |
| <b>seq1508</b> | Firmicutes    | Clostridia   | 0                  | 0                   | 0                   | 0                    |
| <b>seq1577</b> | Firmicutes    | Clostridia   | 0                  | 0                   | 0                   | 0                    |
| <b>seq92</b>   | Firmicutes    | Clostridia   | 0                  | 0                   | 0                   | 0                    |
| <b>seq1012</b> | Firmicutes    | Clostridia   | 0                  | 0                   | 0                   | 0                    |
| <b>seq121</b>  | Firmicutes    | Clostridia   | 0                  | 0                   | 0                   | 0                    |
| <b>seq1311</b> | Firmicutes    | Clostridia   | 0                  | 0                   | 0                   | 0                    |
| <b>seq1780</b> | Firmicutes    | Clostridia   | 0                  | 0                   | 0                   | 0                    |
| <b>seq88</b>   | Firmicutes    | Clostridia   | 0                  | 0                   | 0                   | 0                    |
| <b>seq187</b>  | Firmicutes    | Clostridia   | 0                  | 0                   | 0                   | 0                    |
| <b>seq264</b>  | Firmicutes    | Clostridia   | 0                  | 0                   | 0                   | 0                    |
| <b>seq454</b>  | Firmicutes    | Clostridia   | 0                  | 0                   | 0                   | 0                    |



Sequence Count Table

|                | <b>Phylum</b> | <b>Class</b> | <b>Subject8WK0</b> | <b>Subject8WK12</b> | <b>Subject9WK0</b> | <b>Subject9WK12</b> |
|----------------|---------------|--------------|--------------------|---------------------|--------------------|---------------------|
| <b>seq479</b>  | Firmicutes    | Clostridia   | 0                  | 0                   | 85                 | 108                 |
| <b>seq489</b>  | Firmicutes    | Clostridia   | 0                  | 0                   | 0                  | 0                   |
| <b>seq516</b>  | Firmicutes    | Clostridia   | 0                  | 0                   | 0                  | 0                   |
| <b>seq551</b>  | Firmicutes    | Clostridia   | 0                  | 0                   | 0                  | 0                   |
| <b>seq555</b>  | Firmicutes    | Clostridia   | 0                  | 0                   | 0                  | 0                   |
| <b>seq557</b>  | Firmicutes    | Clostridia   | 0                  | 0                   | 0                  | 0                   |
| <b>seq581</b>  | Firmicutes    | Clostridia   | 0                  | 0                   | 0                  | 0                   |
| <b>seq586</b>  | Firmicutes    | Clostridia   | 0                  | 0                   | 250                | 63                  |
| <b>seq604</b>  | Firmicutes    | Clostridia   | 0                  | 0                   | 0                  | 0                   |
| <b>seq637</b>  | Firmicutes    | Clostridia   | 0                  | 0                   | 95                 | 83                  |
| <b>seq693</b>  | Firmicutes    | Clostridia   | 0                  | 0                   | 0                  | 0                   |
| <b>seq705</b>  | Firmicutes    | Clostridia   | 0                  | 0                   | 140                | 235                 |
| <b>seq726</b>  | Firmicutes    | Clostridia   | 0                  | 0                   | 0                  | 0                   |
| <b>seq760</b>  | Firmicutes    | Clostridia   | 0                  | 0                   | 0                  | 0                   |
| <b>seq795</b>  | Firmicutes    | Clostridia   | 0                  | 0                   | 30                 | 48                  |
| <b>seq809</b>  | Firmicutes    | Clostridia   | 142                | 0                   | 0                  | 0                   |
| <b>seq995</b>  | Firmicutes    | Clostridia   | 0                  | 0                   | 0                  | 0                   |
| <b>seq1002</b> | Firmicutes    | Clostridia   | 0                  | 0                   | 0                  | 0                   |
| <b>seq1239</b> | Firmicutes    | Clostridia   | 0                  | 0                   | 0                  | 0                   |
| <b>seq1384</b> | Firmicutes    | Clostridia   | 0                  | 0                   | 0                  | 0                   |
| <b>seq1461</b> | Firmicutes    | Clostridia   | 0                  | 0                   | 0                  | 0                   |
| <b>seq1508</b> | Firmicutes    | Clostridia   | 0                  | 0                   | 0                  | 0                   |
| <b>seq1577</b> | Firmicutes    | Clostridia   | 0                  | 0                   | 0                  | 0                   |
| <b>seq92</b>   | Firmicutes    | Clostridia   | 441                | 837                 | 91                 | 697                 |
| <b>seq1012</b> | Firmicutes    | Clostridia   | 0                  | 0                   | 0                  | 0                   |
| <b>seq121</b>  | Firmicutes    | Clostridia   | 0                  | 0                   | 0                  | 0                   |
| <b>seq1311</b> | Firmicutes    | Clostridia   | 0                  | 0                   | 0                  | 0                   |
| <b>seq1780</b> | Firmicutes    | Clostridia   | 0                  | 0                   | 0                  | 0                   |
| <b>seq88</b>   | Firmicutes    | Clostridia   | 0                  | 0                   | 0                  | 0                   |
| <b>seq187</b>  | Firmicutes    | Clostridia   | 0                  | 0                   | 0                  | 0                   |
| <b>seq264</b>  | Firmicutes    | Clostridia   | 0                  | 0                   | 0                  | 0                   |
| <b>seq454</b>  | Firmicutes    | Clostridia   | 0                  | 0                   | 0                  | 0                   |

Sequence Count Table

|                | <b>Phylum</b> | <b>Class</b> | <b>Subject10WK0</b> | <b>Subject10WK12</b> | <b>Subject22WK0</b> | <b>Subject22WK12</b> |
|----------------|---------------|--------------|---------------------|----------------------|---------------------|----------------------|
| <b>seq479</b>  | Firmicutes    | Clostridia   | 0                   | 0                    | 0                   | 0                    |
| <b>seq489</b>  | Firmicutes    | Clostridia   | 0                   | 0                    | 0                   | 0                    |
| <b>seq516</b>  | Firmicutes    | Clostridia   | 0                   | 0                    | 0                   | 0                    |
| <b>seq551</b>  | Firmicutes    | Clostridia   | 0                   | 0                    | 0                   | 0                    |
| <b>seq555</b>  | Firmicutes    | Clostridia   | 0                   | 0                    | 0                   | 0                    |
| <b>seq557</b>  | Firmicutes    | Clostridia   | 0                   | 0                    | 366                 | 259                  |
| <b>seq581</b>  | Firmicutes    | Clostridia   | 0                   | 0                    | 21                  | 0                    |
| <b>seq586</b>  | Firmicutes    | Clostridia   | 0                   | 0                    | 0                   | 0                    |
| <b>seq604</b>  | Firmicutes    | Clostridia   | 271                 | 133                  | 0                   | 0                    |
| <b>seq637</b>  | Firmicutes    | Clostridia   | 233                 | 73                   | 0                   | 0                    |
| <b>seq693</b>  | Firmicutes    | Clostridia   | 0                   | 0                    | 0                   | 0                    |
| <b>seq705</b>  | Firmicutes    | Clostridia   | 0                   | 0                    | 0                   | 0                    |
| <b>seq726</b>  | Firmicutes    | Clostridia   | 0                   | 0                    | 0                   | 0                    |
| <b>seq760</b>  | Firmicutes    | Clostridia   | 0                   | 0                    | 0                   | 0                    |
| <b>seq795</b>  | Firmicutes    | Clostridia   | 0                   | 0                    | 0                   | 0                    |
| <b>seq809</b>  | Firmicutes    | Clostridia   | 0                   | 0                    | 0                   | 0                    |
| <b>seq995</b>  | Firmicutes    | Clostridia   | 0                   | 0                    | 0                   | 0                    |
| <b>seq1002</b> | Firmicutes    | Clostridia   | 0                   | 0                    | 0                   | 0                    |
| <b>seq1239</b> | Firmicutes    | Clostridia   | 0                   | 0                    | 0                   | 0                    |
| <b>seq1384</b> | Firmicutes    | Clostridia   | 0                   | 0                    | 0                   | 0                    |
| <b>seq1461</b> | Firmicutes    | Clostridia   | 0                   | 0                    | 33                  | 0                    |
| <b>seq1508</b> | Firmicutes    | Clostridia   | 0                   | 0                    | 0                   | 0                    |
| <b>seq1577</b> | Firmicutes    | Clostridia   | 0                   | 0                    | 0                   | 0                    |
| <b>seq92</b>   | Firmicutes    | Clostridia   | 0                   | 0                    | 46                  | 32                   |
| <b>seq1012</b> | Firmicutes    | Clostridia   | 0                   | 0                    | 0                   | 0                    |
| <b>seq121</b>  | Firmicutes    | Clostridia   | 0                   | 0                    | 350                 | 293                  |
| <b>seq1311</b> | Firmicutes    | Clostridia   | 0                   | 0                    | 0                   | 0                    |
| <b>seq1780</b> | Firmicutes    | Clostridia   | 0                   | 0                    | 0                   | 0                    |
| <b>seq88</b>   | Firmicutes    | Clostridia   | 0                   | 0                    | 1487                | 2018                 |
| <b>seq187</b>  | Firmicutes    | Clostridia   | 0                   | 0                    | 0                   | 0                    |
| <b>seq264</b>  | Firmicutes    | Clostridia   | 0                   | 0                    | 0                   | 0                    |
| <b>seq454</b>  | Firmicutes    | Clostridia   | 0                   | 0                    | 0                   | 0                    |

Sequence Count Table

|                | <b>Phylum</b> | <b>Class</b> | <b>Subject23WK0</b> | <b>Subject23WK12</b> | <b>Subject24WK0</b> | <b>Subject24WK12</b> |
|----------------|---------------|--------------|---------------------|----------------------|---------------------|----------------------|
| <b>seq479</b>  | Firmicutes    | Clostridia   | 0                   | 0                    | 0                   | 0                    |
| <b>seq489</b>  | Firmicutes    | Clostridia   | 0                   | 0                    | 0                   | 0                    |
| <b>seq516</b>  | Firmicutes    | Clostridia   | 0                   | 0                    | 140                 | 188                  |
| <b>seq551</b>  | Firmicutes    | Clostridia   | 0                   | 0                    | 0                   | 0                    |
| <b>seq555</b>  | Firmicutes    | Clostridia   | 0                   | 0                    | 0                   | 0                    |
| <b>seq557</b>  | Firmicutes    | Clostridia   | 0                   | 0                    | 0                   | 0                    |
| <b>seq581</b>  | Firmicutes    | Clostridia   | 0                   | 0                    | 0                   | 0                    |
| <b>seq586</b>  | Firmicutes    | Clostridia   | 0                   | 0                    | 0                   | 0                    |
| <b>seq604</b>  | Firmicutes    | Clostridia   | 0                   | 0                    | 0                   | 0                    |
| <b>seq637</b>  | Firmicutes    | Clostridia   | 0                   | 0                    | 0                   | 0                    |
| <b>seq693</b>  | Firmicutes    | Clostridia   | 0                   | 0                    | 0                   | 0                    |
| <b>seq705</b>  | Firmicutes    | Clostridia   | 0                   | 0                    | 0                   | 0                    |
| <b>seq726</b>  | Firmicutes    | Clostridia   | 0                   | 0                    | 0                   | 0                    |
| <b>seq760</b>  | Firmicutes    | Clostridia   | 0                   | 0                    | 0                   | 0                    |
| <b>seq795</b>  | Firmicutes    | Clostridia   | 0                   | 0                    | 0                   | 0                    |
| <b>seq809</b>  | Firmicutes    | Clostridia   | 0                   | 0                    | 0                   | 0                    |
| <b>seq995</b>  | Firmicutes    | Clostridia   | 0                   | 0                    | 0                   | 0                    |
| <b>seq1002</b> | Firmicutes    | Clostridia   | 0                   | 0                    | 0                   | 0                    |
| <b>seq1239</b> | Firmicutes    | Clostridia   | 0                   | 0                    | 0                   | 0                    |
| <b>seq1384</b> | Firmicutes    | Clostridia   | 0                   | 0                    | 0                   | 0                    |
| <b>seq1461</b> | Firmicutes    | Clostridia   | 0                   | 0                    | 0                   | 0                    |
| <b>seq1508</b> | Firmicutes    | Clostridia   | 0                   | 0                    | 0                   | 0                    |
| <b>seq1577</b> | Firmicutes    | Clostridia   | 0                   | 0                    | 0                   | 0                    |
| <b>seq92</b>   | Firmicutes    | Clostridia   | 526                 | 476                  | 756                 | 158                  |
| <b>seq1012</b> | Firmicutes    | Clostridia   | 0                   | 0                    | 0                   | 0                    |
| <b>seq121</b>  | Firmicutes    | Clostridia   | 201                 | 315                  | 494                 | 668                  |
| <b>seq1311</b> | Firmicutes    | Clostridia   | 0                   | 0                    | 0                   | 0                    |
| <b>seq1780</b> | Firmicutes    | Clostridia   | 0                   | 0                    | 0                   | 0                    |
| <b>seq88</b>   | Firmicutes    | Clostridia   | 1819                | 3196                 | 597                 | 0                    |
| <b>seq187</b>  | Firmicutes    | Clostridia   | 0                   | 0                    | 0                   | 0                    |
| <b>seq264</b>  | Firmicutes    | Clostridia   | 0                   | 0                    | 172                 | 0                    |
| <b>seq454</b>  | Firmicutes    | Clostridia   | 0                   | 0                    | 0                   | 0                    |

Sequence Count Table

|                | <b>Phylum</b> | <b>Class</b> | <b>Subject11WK0</b> | <b>Subject11WK12</b> | <b>Subject12WK0</b> | <b>Subject12WK12</b> |
|----------------|---------------|--------------|---------------------|----------------------|---------------------|----------------------|
| <b>seq479</b>  | Firmicutes    | Clostridia   | 0                   | 0                    | 0                   | 0                    |
| <b>seq489</b>  | Firmicutes    | Clostridia   | 0                   | 0                    | 0                   | 0                    |
| <b>seq516</b>  | Firmicutes    | Clostridia   | 0                   | 0                    | 0                   | 84                   |
| <b>seq551</b>  | Firmicutes    | Clostridia   | 0                   | 0                    | 0                   | 0                    |
| <b>seq555</b>  | Firmicutes    | Clostridia   | 0                   | 0                    | 0                   | 0                    |
| <b>seq557</b>  | Firmicutes    | Clostridia   | 0                   | 0                    | 0                   | 0                    |
| <b>seq581</b>  | Firmicutes    | Clostridia   | 0                   | 0                    | 0                   | 0                    |
| <b>seq586</b>  | Firmicutes    | Clostridia   | 0                   | 0                    | 0                   | 0                    |
| <b>seq604</b>  | Firmicutes    | Clostridia   | 0                   | 0                    | 0                   | 0                    |
| <b>seq637</b>  | Firmicutes    | Clostridia   | 0                   | 0                    | 0                   | 0                    |
| <b>seq693</b>  | Firmicutes    | Clostridia   | 0                   | 0                    | 0                   | 0                    |
| <b>seq705</b>  | Firmicutes    | Clostridia   | 0                   | 0                    | 0                   | 0                    |
| <b>seq726</b>  | Firmicutes    | Clostridia   | 0                   | 0                    | 0                   | 0                    |
| <b>seq760</b>  | Firmicutes    | Clostridia   | 0                   | 0                    | 0                   | 0                    |
| <b>seq795</b>  | Firmicutes    | Clostridia   | 0                   | 0                    | 0                   | 0                    |
| <b>seq809</b>  | Firmicutes    | Clostridia   | 0                   | 0                    | 0                   | 0                    |
| <b>seq995</b>  | Firmicutes    | Clostridia   | 0                   | 0                    | 0                   | 0                    |
| <b>seq1002</b> | Firmicutes    | Clostridia   | 98                  | 45                   | 0                   | 0                    |
| <b>seq1239</b> | Firmicutes    | Clostridia   | 0                   | 0                    | 0                   | 0                    |
| <b>seq1384</b> | Firmicutes    | Clostridia   | 0                   | 0                    | 0                   | 0                    |
| <b>seq1461</b> | Firmicutes    | Clostridia   | 0                   | 0                    | 0                   | 0                    |
| <b>seq1508</b> | Firmicutes    | Clostridia   | 0                   | 0                    | 0                   | 0                    |
| <b>seq1577</b> | Firmicutes    | Clostridia   | 0                   | 0                    | 0                   | 0                    |
| <b>seq92</b>   | Firmicutes    | Clostridia   | 0                   | 0                    | 93                  | 57                   |
| <b>seq1012</b> | Firmicutes    | Clostridia   | 0                   | 0                    | 0                   | 0                    |
| <b>seq121</b>  | Firmicutes    | Clostridia   | 0                   | 0                    | 361                 | 418                  |
| <b>seq1311</b> | Firmicutes    | Clostridia   | 0                   | 0                    | 0                   | 0                    |
| <b>seq1780</b> | Firmicutes    | Clostridia   | 0                   | 0                    | 0                   | 0                    |
| <b>seq88</b>   | Firmicutes    | Clostridia   | 0                   | 0                    | 0                   | 0                    |
| <b>seq187</b>  | Firmicutes    | Clostridia   | 0                   | 0                    | 0                   | 0                    |
| <b>seq264</b>  | Firmicutes    | Clostridia   | 0                   | 0                    | 0                   | 0                    |
| <b>seq454</b>  | Firmicutes    | Clostridia   | 0                   | 0                    | 0                   | 0                    |

Sequence Count Table

|                | <b>Phylum</b> | <b>Class</b> | <b>Subject25WK0</b> | <b>Subject25WK12</b> | <b>Subject38WK0</b> | <b>Subject38WK12</b> |
|----------------|---------------|--------------|---------------------|----------------------|---------------------|----------------------|
| <b>seq479</b>  | Firmicutes    | Clostridia   | 0                   | 0                    | 0                   | 0                    |
| <b>seq489</b>  | Firmicutes    | Clostridia   | 170                 | 638                  | 0                   | 0                    |
| <b>seq516</b>  | Firmicutes    | Clostridia   | 0                   | 0                    | 0                   | 0                    |
| <b>seq551</b>  | Firmicutes    | Clostridia   | 0                   | 0                    | 0                   | 0                    |
| <b>seq555</b>  | Firmicutes    | Clostridia   | 0                   | 0                    | 0                   | 0                    |
| <b>seq557</b>  | Firmicutes    | Clostridia   | 0                   | 0                    | 0                   | 0                    |
| <b>seq581</b>  | Firmicutes    | Clostridia   | 0                   | 0                    | 0                   | 0                    |
| <b>seq586</b>  | Firmicutes    | Clostridia   | 0                   | 0                    | 0                   | 0                    |
| <b>seq604</b>  | Firmicutes    | Clostridia   | 0                   | 0                    | 0                   | 0                    |
| <b>seq637</b>  | Firmicutes    | Clostridia   | 0                   | 0                    | 0                   | 0                    |
| <b>seq693</b>  | Firmicutes    | Clostridia   | 0                   | 0                    | 0                   | 0                    |
| <b>seq705</b>  | Firmicutes    | Clostridia   | 0                   | 0                    | 0                   | 0                    |
| <b>seq726</b>  | Firmicutes    | Clostridia   | 0                   | 0                    | 0                   | 0                    |
| <b>seq760</b>  | Firmicutes    | Clostridia   | 0                   | 0                    | 0                   | 0                    |
| <b>seq795</b>  | Firmicutes    | Clostridia   | 0                   | 0                    | 0                   | 0                    |
| <b>seq809</b>  | Firmicutes    | Clostridia   | 0                   | 0                    | 0                   | 0                    |
| <b>seq995</b>  | Firmicutes    | Clostridia   | 0                   | 0                    | 0                   | 0                    |
| <b>seq1002</b> | Firmicutes    | Clostridia   | 0                   | 0                    | 0                   | 0                    |
| <b>seq1239</b> | Firmicutes    | Clostridia   | 0                   | 0                    | 0                   | 0                    |
| <b>seq1384</b> | Firmicutes    | Clostridia   | 0                   | 0                    | 0                   | 0                    |
| <b>seq1461</b> | Firmicutes    | Clostridia   | 0                   | 0                    | 0                   | 0                    |
| <b>seq1508</b> | Firmicutes    | Clostridia   | 0                   | 0                    | 0                   | 0                    |
| <b>seq1577</b> | Firmicutes    | Clostridia   | 0                   | 0                    | 0                   | 0                    |
| <b>seq92</b>   | Firmicutes    | Clostridia   | 28                  | 129                  | 0                   | 0                    |
| <b>seq1012</b> | Firmicutes    | Clostridia   | 0                   | 0                    | 0                   | 0                    |
| <b>seq121</b>  | Firmicutes    | Clostridia   | 439                 | 342                  | 0                   | 0                    |
| <b>seq1311</b> | Firmicutes    | Clostridia   | 0                   | 0                    | 0                   | 0                    |
| <b>seq1780</b> | Firmicutes    | Clostridia   | 0                   | 0                    | 0                   | 0                    |
| <b>seq88</b>   | Firmicutes    | Clostridia   | 0                   | 0                    | 0                   | 0                    |
| <b>seq187</b>  | Firmicutes    | Clostridia   | 0                   | 0                    | 0                   | 0                    |
| <b>seq264</b>  | Firmicutes    | Clostridia   | 0                   | 0                    | 0                   | 0                    |
| <b>seq454</b>  | Firmicutes    | Clostridia   | 0                   | 0                    | 0                   | 0                    |

Sequence Count Table

|                | <b>Phylum</b> | <b>Class</b> | <b>Subject31WK0</b> | <b>Subject31WK12</b> | <b>Subject32WK0</b> | <b>Subject32WK12</b> |
|----------------|---------------|--------------|---------------------|----------------------|---------------------|----------------------|
| <b>seq479</b>  | Firmicutes    | Clostridia   | 0                   | 0                    | 0                   | 0                    |
| <b>seq489</b>  | Firmicutes    | Clostridia   | 0                   | 0                    | 0                   | 0                    |
| <b>seq516</b>  | Firmicutes    | Clostridia   | 0                   | 0                    | 0                   | 0                    |
| <b>seq551</b>  | Firmicutes    | Clostridia   | 0                   | 0                    | 30                  | 0                    |
| <b>seq555</b>  | Firmicutes    | Clostridia   | 0                   | 0                    | 0                   | 0                    |
| <b>seq557</b>  | Firmicutes    | Clostridia   | 0                   | 0                    | 0                   | 0                    |
| <b>seq581</b>  | Firmicutes    | Clostridia   | 0                   | 0                    | 39                  | 0                    |
| <b>seq586</b>  | Firmicutes    | Clostridia   | 0                   | 0                    | 0                   | 0                    |
| <b>seq604</b>  | Firmicutes    | Clostridia   | 0                   | 0                    | 0                   | 0                    |
| <b>seq637</b>  | Firmicutes    | Clostridia   | 0                   | 0                    | 0                   | 0                    |
| <b>seq693</b>  | Firmicutes    | Clostridia   | 0                   | 0                    | 0                   | 0                    |
| <b>seq705</b>  | Firmicutes    | Clostridia   | 0                   | 0                    | 0                   | 0                    |
| <b>seq726</b>  | Firmicutes    | Clostridia   | 0                   | 0                    | 0                   | 0                    |
| <b>seq760</b>  | Firmicutes    | Clostridia   | 0                   | 0                    | 0                   | 0                    |
| <b>seq795</b>  | Firmicutes    | Clostridia   | 0                   | 0                    | 0                   | 0                    |
| <b>seq809</b>  | Firmicutes    | Clostridia   | 0                   | 0                    | 0                   | 0                    |
| <b>seq995</b>  | Firmicutes    | Clostridia   | 0                   | 0                    | 0                   | 0                    |
| <b>seq1002</b> | Firmicutes    | Clostridia   | 0                   | 0                    | 0                   | 0                    |
| <b>seq1239</b> | Firmicutes    | Clostridia   | 0                   | 0                    | 0                   | 0                    |
| <b>seq1384</b> | Firmicutes    | Clostridia   | 0                   | 0                    | 0                   | 0                    |
| <b>seq1461</b> | Firmicutes    | Clostridia   | 0                   | 0                    | 0                   | 0                    |
| <b>seq1508</b> | Firmicutes    | Clostridia   | 0                   | 0                    | 0                   | 0                    |
| <b>seq1577</b> | Firmicutes    | Clostridia   | 0                   | 0                    | 0                   | 0                    |
| <b>seq92</b>   | Firmicutes    | Clostridia   | 0                   | 0                    | 0                   | 0                    |
| <b>seq1012</b> | Firmicutes    | Clostridia   | 0                   | 0                    | 0                   | 0                    |
| <b>seq121</b>  | Firmicutes    | Clostridia   | 0                   | 0                    | 0                   | 0                    |
| <b>seq1311</b> | Firmicutes    | Clostridia   | 0                   | 0                    | 0                   | 0                    |
| <b>seq1780</b> | Firmicutes    | Clostridia   | 0                   | 0                    | 0                   | 0                    |
| <b>seq88</b>   | Firmicutes    | Clostridia   | 0                   | 0                    | 0                   | 0                    |
| <b>seq187</b>  | Firmicutes    | Clostridia   | 0                   | 0                    | 0                   | 0                    |
| <b>seq264</b>  | Firmicutes    | Clostridia   | 0                   | 0                    | 0                   | 0                    |
| <b>seq454</b>  | Firmicutes    | Clostridia   | 0                   | 0                    | 0                   | 0                    |

Sequence Count Table

|                | <b>Phylum</b> | <b>Class</b> | <b>Subject13WK0</b> | <b>Subject13WK12</b> | <b>Subject39WK0</b> | <b>Subject39WK12</b> |
|----------------|---------------|--------------|---------------------|----------------------|---------------------|----------------------|
| <b>seq479</b>  | Firmicutes    | Clostridia   | 0                   | 0                    | 0                   | 0                    |
| <b>seq489</b>  | Firmicutes    | Clostridia   | 0                   | 0                    | 0                   | 0                    |
| <b>seq516</b>  | Firmicutes    | Clostridia   | 0                   | 0                    | 0                   | 0                    |
| <b>seq551</b>  | Firmicutes    | Clostridia   | 0                   | 0                    | 0                   | 0                    |
| <b>seq555</b>  | Firmicutes    | Clostridia   | 0                   | 0                    | 0                   | 0                    |
| <b>seq557</b>  | Firmicutes    | Clostridia   | 0                   | 0                    | 0                   | 0                    |
| <b>seq581</b>  | Firmicutes    | Clostridia   | 0                   | 0                    | 0                   | 0                    |
| <b>seq586</b>  | Firmicutes    | Clostridia   | 0                   | 0                    | 0                   | 0                    |
| <b>seq604</b>  | Firmicutes    | Clostridia   | 0                   | 0                    | 0                   | 0                    |
| <b>seq637</b>  | Firmicutes    | Clostridia   | 0                   | 0                    | 0                   | 0                    |
| <b>seq693</b>  | Firmicutes    | Clostridia   | 0                   | 0                    | 0                   | 0                    |
| <b>seq705</b>  | Firmicutes    | Clostridia   | 0                   | 0                    | 0                   | 0                    |
| <b>seq726</b>  | Firmicutes    | Clostridia   | 0                   | 0                    | 0                   | 0                    |
| <b>seq760</b>  | Firmicutes    | Clostridia   | 0                   | 0                    | 0                   | 0                    |
| <b>seq795</b>  | Firmicutes    | Clostridia   | 0                   | 0                    | 0                   | 0                    |
| <b>seq809</b>  | Firmicutes    | Clostridia   | 0                   | 0                    | 0                   | 0                    |
| <b>seq995</b>  | Firmicutes    | Clostridia   | 0                   | 0                    | 0                   | 0                    |
| <b>seq1002</b> | Firmicutes    | Clostridia   | 0                   | 0                    | 0                   | 0                    |
| <b>seq1239</b> | Firmicutes    | Clostridia   | 0                   | 0                    | 0                   | 0                    |
| <b>seq1384</b> | Firmicutes    | Clostridia   | 0                   | 0                    | 0                   | 0                    |
| <b>seq1461</b> | Firmicutes    | Clostridia   | 0                   | 0                    | 0                   | 0                    |
| <b>seq1508</b> | Firmicutes    | Clostridia   | 0                   | 0                    | 0                   | 0                    |
| <b>seq1577</b> | Firmicutes    | Clostridia   | 0                   | 0                    | 0                   | 0                    |
| <b>seq92</b>   | Firmicutes    | Clostridia   | 532                 | 93                   | 0                   | 160                  |
| <b>seq1012</b> | Firmicutes    | Clostridia   | 0                   | 0                    | 0                   | 0                    |
| <b>seq121</b>  | Firmicutes    | Clostridia   | 0                   | 0                    | 0                   | 133                  |
| <b>seq1311</b> | Firmicutes    | Clostridia   | 0                   | 0                    | 0                   | 0                    |
| <b>seq1780</b> | Firmicutes    | Clostridia   | 0                   | 9                    | 0                   | 0                    |
| <b>seq88</b>   | Firmicutes    | Clostridia   | 0                   | 0                    | 0                   | 0                    |
| <b>seq187</b>  | Firmicutes    | Clostridia   | 2190                | 1380                 | 0                   | 0                    |
| <b>seq264</b>  | Firmicutes    | Clostridia   | 0                   | 0                    | 0                   | 0                    |
| <b>seq454</b>  | Firmicutes    | Clostridia   | 0                   | 0                    | 0                   | 0                    |

Sequence Count Table

|                | <b>Phylum</b> | <b>Class</b> | <b>Subject26WK0</b> | <b>Subject26WK12</b> | <b>Subject14WK0</b> | <b>Subject14WK12</b> |
|----------------|---------------|--------------|---------------------|----------------------|---------------------|----------------------|
| <b>seq479</b>  | Firmicutes    | Clostridia   | 0                   | 0                    | 0                   | 0                    |
| <b>seq489</b>  | Firmicutes    | Clostridia   | 0                   | 0                    | 0                   | 0                    |
| <b>seq516</b>  | Firmicutes    | Clostridia   | 0                   | 0                    | 0                   | 0                    |
| <b>seq551</b>  | Firmicutes    | Clostridia   | 0                   | 0                    | 0                   | 0                    |
| <b>seq555</b>  | Firmicutes    | Clostridia   | 0                   | 0                    | 0                   | 0                    |
| <b>seq557</b>  | Firmicutes    | Clostridia   | 0                   | 0                    | 0                   | 0                    |
| <b>seq581</b>  | Firmicutes    | Clostridia   | 0                   | 0                    | 0                   | 0                    |
| <b>seq586</b>  | Firmicutes    | Clostridia   | 0                   | 0                    | 0                   | 0                    |
| <b>seq604</b>  | Firmicutes    | Clostridia   | 0                   | 0                    | 0                   | 0                    |
| <b>seq637</b>  | Firmicutes    | Clostridia   | 0                   | 0                    | 0                   | 0                    |
| <b>seq693</b>  | Firmicutes    | Clostridia   | 101                 | 102                  | 0                   | 0                    |
| <b>seq705</b>  | Firmicutes    | Clostridia   | 0                   | 0                    | 0                   | 0                    |
| <b>seq726</b>  | Firmicutes    | Clostridia   | 0                   | 0                    | 0                   | 0                    |
| <b>seq760</b>  | Firmicutes    | Clostridia   | 0                   | 0                    | 0                   | 0                    |
| <b>seq795</b>  | Firmicutes    | Clostridia   | 0                   | 0                    | 0                   | 0                    |
| <b>seq809</b>  | Firmicutes    | Clostridia   | 0                   | 0                    | 0                   | 0                    |
| <b>seq995</b>  | Firmicutes    | Clostridia   | 0                   | 0                    | 0                   | 0                    |
| <b>seq1002</b> | Firmicutes    | Clostridia   | 0                   | 0                    | 0                   | 0                    |
| <b>seq1239</b> | Firmicutes    | Clostridia   | 0                   | 0                    | 0                   | 0                    |
| <b>seq1384</b> | Firmicutes    | Clostridia   | 0                   | 0                    | 0                   | 0                    |
| <b>seq1461</b> | Firmicutes    | Clostridia   | 0                   | 0                    | 0                   | 0                    |
| <b>seq1508</b> | Firmicutes    | Clostridia   | 0                   | 0                    | 0                   | 0                    |
| <b>seq1577</b> | Firmicutes    | Clostridia   | 0                   | 0                    | 0                   | 0                    |
| <b>seq92</b>   | Firmicutes    | Clostridia   | 0                   | 0                    | 528                 | 397                  |
| <b>seq1012</b> | Firmicutes    | Clostridia   | 0                   | 0                    | 0                   | 0                    |
| <b>seq121</b>  | Firmicutes    | Clostridia   | 0                   | 0                    | 281                 | 363                  |
| <b>seq1311</b> | Firmicutes    | Clostridia   | 0                   | 0                    | 0                   | 0                    |
| <b>seq1780</b> | Firmicutes    | Clostridia   | 0                   | 0                    | 0                   | 0                    |
| <b>seq88</b>   | Firmicutes    | Clostridia   | 0                   | 0                    | 1697                | 2019                 |
| <b>seq187</b>  | Firmicutes    | Clostridia   | 0                   | 0                    | 0                   | 0                    |
| <b>seq264</b>  | Firmicutes    | Clostridia   | 0                   | 0                    | 0                   | 0                    |
| <b>seq454</b>  | Firmicutes    | Clostridia   | 0                   | 0                    | 0                   | 0                    |



Sequence Count Table

|                | <b>Phylum</b> | <b>Class</b> | <b>Subject27WK0</b> | <b>Subject27WK12</b> | <b>Subject15WK0</b> | <b>Subject15WK12</b> |
|----------------|---------------|--------------|---------------------|----------------------|---------------------|----------------------|
| <b>seq479</b>  | Firmicutes    | Clostridia   | 0                   | 0                    | 218                 | 384                  |
| <b>seq489</b>  | Firmicutes    | Clostridia   | 0                   | 0                    | 0                   | 0                    |
| <b>seq516</b>  | Firmicutes    | Clostridia   | 0                   | 0                    | 0                   | 0                    |
| <b>seq551</b>  | Firmicutes    | Clostridia   | 88                  | 29                   | 0                   | 120                  |
| <b>seq555</b>  | Firmicutes    | Clostridia   | 0                   | 0                    | 0                   | 0                    |
| <b>seq557</b>  | Firmicutes    | Clostridia   | 0                   | 0                    | 0                   | 0                    |
| <b>seq581</b>  | Firmicutes    | Clostridia   | 0                   | 0                    | 0                   | 0                    |
| <b>seq586</b>  | Firmicutes    | Clostridia   | 0                   | 0                    | 0                   | 0                    |
| <b>seq604</b>  | Firmicutes    | Clostridia   | 0                   | 0                    | 0                   | 0                    |
| <b>seq637</b>  | Firmicutes    | Clostridia   | 0                   | 0                    | 0                   | 0                    |
| <b>seq693</b>  | Firmicutes    | Clostridia   | 0                   | 0                    | 0                   | 0                    |
| <b>seq705</b>  | Firmicutes    | Clostridia   | 0                   | 0                    | 0                   | 0                    |
| <b>seq726</b>  | Firmicutes    | Clostridia   | 0                   | 0                    | 0                   | 0                    |
| <b>seq760</b>  | Firmicutes    | Clostridia   | 204                 | 103                  | 0                   | 0                    |
| <b>seq795</b>  | Firmicutes    | Clostridia   | 0                   | 0                    | 54                  | 144                  |
| <b>seq809</b>  | Firmicutes    | Clostridia   | 0                   | 0                    | 0                   | 0                    |
| <b>seq995</b>  | Firmicutes    | Clostridia   | 0                   | 0                    | 0                   | 0                    |
| <b>seq1002</b> | Firmicutes    | Clostridia   | 0                   | 0                    | 0                   | 0                    |
| <b>seq1239</b> | Firmicutes    | Clostridia   | 0                   | 0                    | 0                   | 70                   |
| <b>seq1384</b> | Firmicutes    | Clostridia   | 0                   | 0                    | 0                   | 0                    |
| <b>seq1461</b> | Firmicutes    | Clostridia   | 0                   | 0                    | 0                   | 0                    |
| <b>seq1508</b> | Firmicutes    | Clostridia   | 0                   | 28                   | 0                   | 0                    |
| <b>seq1577</b> | Firmicutes    | Clostridia   | 0                   | 0                    | 0                   | 0                    |
| <b>seq92</b>   | Firmicutes    | Clostridia   | 170                 | 172                  | 125                 | 538                  |
| <b>seq1012</b> | Firmicutes    | Clostridia   | 0                   | 0                    | 0                   | 0                    |
| <b>seq121</b>  | Firmicutes    | Clostridia   | 602                 | 312                  | 0                   | 0                    |
| <b>seq1311</b> | Firmicutes    | Clostridia   | 0                   | 0                    | 0                   | 0                    |
| <b>seq1780</b> | Firmicutes    | Clostridia   | 0                   | 0                    | 0                   | 0                    |
| <b>seq88</b>   | Firmicutes    | Clostridia   | 0                   | 0                    | 0                   | 0                    |
| <b>seq187</b>  | Firmicutes    | Clostridia   | 0                   | 15                   | 67                  | 0                    |
| <b>seq264</b>  | Firmicutes    | Clostridia   | 0                   | 0                    | 0                   | 0                    |
| <b>seq454</b>  | Firmicutes    | Clostridia   | 0                   | 0                    | 0                   | 0                    |

Sequence Count Table

|                | <b>Phylum</b> | <b>Class</b> | <b>Δ</b> |  |  |  |
|----------------|---------------|--------------|----------|--|--|--|
| <b>seq479</b>  | Firmicutes    | Clostridia   |          |  |  |  |
| <b>seq489</b>  | Firmicutes    | Clostridia   |          |  |  |  |
| <b>seq516</b>  | Firmicutes    | Clostridia   |          |  |  |  |
| <b>seq551</b>  | Firmicutes    | Clostridia   |          |  |  |  |
| <b>seq555</b>  | Firmicutes    | Clostridia   |          |  |  |  |
| <b>seq557</b>  | Firmicutes    | Clostridia   |          |  |  |  |
| <b>seq581</b>  | Firmicutes    | Clostridia   |          |  |  |  |
| <b>seq586</b>  | Firmicutes    | Clostridia   |          |  |  |  |
| <b>seq604</b>  | Firmicutes    | Clostridia   |          |  |  |  |
| <b>seq637</b>  | Firmicutes    | Clostridia   |          |  |  |  |
| <b>seq693</b>  | Firmicutes    | Clostridia   |          |  |  |  |
| <b>seq705</b>  | Firmicutes    | Clostridia   |          |  |  |  |
| <b>seq726</b>  | Firmicutes    | Clostridia   |          |  |  |  |
| <b>seq760</b>  | Firmicutes    | Clostridia   |          |  |  |  |
| <b>seq795</b>  | Firmicutes    | Clostridia   |          |  |  |  |
| <b>seq809</b>  | Firmicutes    | Clostridia   |          |  |  |  |
| <b>seq995</b>  | Firmicutes    | Clostridia   |          |  |  |  |
| <b>seq1002</b> | Firmicutes    | Clostridia   |          |  |  |  |
| <b>seq1239</b> | Firmicutes    | Clostridia   |          |  |  |  |
| <b>seq1384</b> | Firmicutes    | Clostridia   |          |  |  |  |
| <b>seq1461</b> | Firmicutes    | Clostridia   |          |  |  |  |
| <b>seq1508</b> | Firmicutes    | Clostridia   |          |  |  |  |
| <b>seq1577</b> | Firmicutes    | Clostridia   |          |  |  |  |
| <b>seq92</b>   | Firmicutes    | Clostridia   |          |  |  |  |
| <b>seq1012</b> | Firmicutes    | Clostridia   |          |  |  |  |
| <b>seq121</b>  | Firmicutes    | Clostridia   |          |  |  |  |
| <b>seq1311</b> | Firmicutes    | Clostridia   |          |  |  |  |
| <b>seq1780</b> | Firmicutes    | Clostridia   |          |  |  |  |
| <b>seq88</b>   | Firmicutes    | Clostridia   |          |  |  |  |
| <b>seq187</b>  | Firmicutes    | Clostridia   |          |  |  |  |
| <b>seq264</b>  | Firmicutes    | Clostridia   |          |  |  |  |
| <b>seq454</b>  | Firmicutes    | Clostridia   |          |  |  |  |

Sequence Count Table

|                | <b>Phylum</b> | <b>Class</b> | <b>Order</b>  | <b>Family</b>   |
|----------------|---------------|--------------|---------------|-----------------|
| <b>seq576</b>  | Firmicutes    | Clostridia   | Clostridiales | Lachnospiraceae |
| <b>seq915</b>  | Firmicutes    | Clostridia   | Clostridiales | Lachnospiraceae |
| <b>seq46</b>   | Firmicutes    | Clostridia   | Clostridiales | Lachnospiraceae |
| <b>seq409</b>  | Firmicutes    | Clostridia   | Clostridiales | Lachnospiraceae |
| <b>seq629</b>  | Firmicutes    | Clostridia   | Clostridiales | Lachnospiraceae |
| <b>seq691</b>  | Firmicutes    | Clostridia   | Clostridiales | Lachnospiraceae |
| <b>seq838</b>  | Firmicutes    | Clostridia   | Clostridiales | Lachnospiraceae |
| <b>seq862</b>  | Firmicutes    | Clostridia   | Clostridiales | Lachnospiraceae |
| <b>seq1023</b> | Firmicutes    | Clostridia   | Clostridiales | Lachnospiraceae |
| <b>seq1142</b> | Firmicutes    | Clostridia   | Clostridiales | Lachnospiraceae |
| <b>seq1202</b> | Firmicutes    | Clostridia   | Clostridiales | Lachnospiraceae |
| <b>seq1568</b> | Firmicutes    | Clostridia   | Clostridiales | Lachnospiraceae |
| <b>seq17</b>   | Firmicutes    | Clostridia   | Clostridiales | Lachnospiraceae |
| <b>seq80</b>   | Firmicutes    | Clostridia   | Clostridiales | Lachnospiraceae |
| <b>seq509</b>  | Firmicutes    | Clostridia   | Clostridiales | Lachnospiraceae |
| <b>seq623</b>  | Firmicutes    | Clostridia   | Clostridiales | Lachnospiraceae |
| <b>seq863</b>  | Firmicutes    | Clostridia   | Clostridiales | Lachnospiraceae |
| <b>seq1116</b> | Firmicutes    | Clostridia   | Clostridiales | Lachnospiraceae |
| <b>seq1140</b> | Firmicutes    | Clostridia   | Clostridiales | Lachnospiraceae |
| <b>seq1175</b> | Firmicutes    | Clostridia   | Clostridiales | Lachnospiraceae |
| <b>seq1208</b> | Firmicutes    | Clostridia   | Clostridiales | Lachnospiraceae |
| <b>seq321</b>  | Firmicutes    | Clostridia   | Clostridiales | Lachnospiraceae |
| <b>seq420</b>  | Firmicutes    | Clostridia   | Clostridiales | Lachnospiraceae |
| <b>seq1812</b> | Firmicutes    | Clostridia   | Clostridiales | Lachnospiraceae |
| <b>seq8</b>    | Firmicutes    | Clostridia   | Clostridiales | Lachnospiraceae |
| <b>seq191</b>  | Firmicutes    | Clostridia   | Clostridiales | Lachnospiraceae |
| <b>seq500</b>  | Firmicutes    | Clostridia   | Clostridiales | Lachnospiraceae |
| <b>seq570</b>  | Firmicutes    | Clostridia   | Clostridiales | Lachnospiraceae |
| <b>seq965</b>  | Firmicutes    | Clostridia   | Clostridiales | Lachnospiraceae |
| <b>seq1033</b> | Firmicutes    | Clostridia   | Clostridiales | Lachnospiraceae |
| <b>seq1168</b> | Firmicutes    | Clostridia   | Clostridiales | Lachnospiraceae |
| <b>seq1184</b> | Firmicutes    | Clostridia   | Clostridiales | Lachnospiraceae |

Sequence Count Table

|                | <b>Phylum</b> | <b>Class</b> | <b>Genus</b>     | <b>Species</b>  |
|----------------|---------------|--------------|------------------|-----------------|
| <b>seq576</b>  | Firmicutes    | Clostridia   | Coprococcus_2    |                 |
| <b>seq915</b>  | Firmicutes    | Clostridia   | Coprococcus_2    |                 |
| <b>seq46</b>   | Firmicutes    | Clostridia   | Coprococcus_3    | comes           |
| <b>seq409</b>  | Firmicutes    | Clostridia   | Coprococcus_3    |                 |
| <b>seq629</b>  | Firmicutes    | Clostridia   | Coprococcus_3    |                 |
| <b>seq691</b>  | Firmicutes    | Clostridia   | Coprococcus_3    |                 |
| <b>seq838</b>  | Firmicutes    | Clostridia   | Coprococcus_3    |                 |
| <b>seq862</b>  | Firmicutes    | Clostridia   | Coprococcus_3    |                 |
| <b>seq1023</b> | Firmicutes    | Clostridia   | Coprococcus_3    |                 |
| <b>seq1142</b> | Firmicutes    | Clostridia   | Coprococcus_3    |                 |
| <b>seq1202</b> | Firmicutes    | Clostridia   | Coprococcus_3    |                 |
| <b>seq1568</b> | Firmicutes    | Clostridia   | Cuneatibacter    | caecimuris      |
| <b>seq17</b>   | Firmicutes    | Clostridia   | Dorea            | longicatena     |
| <b>seq80</b>   | Firmicutes    | Clostridia   | Dorea            | formicigenerans |
| <b>seq509</b>  | Firmicutes    | Clostridia   | Dorea            |                 |
| <b>seq623</b>  | Firmicutes    | Clostridia   | Dorea            |                 |
| <b>seq863</b>  | Firmicutes    | Clostridia   | Dorea            |                 |
| <b>seq1116</b> | Firmicutes    | Clostridia   | Dorea            |                 |
| <b>seq1140</b> | Firmicutes    | Clostridia   | Dorea            |                 |
| <b>seq1175</b> | Firmicutes    | Clostridia   | Dorea            |                 |
| <b>seq1208</b> | Firmicutes    | Clostridia   | Dorea            |                 |
| <b>seq321</b>  | Firmicutes    | Clostridia   | Eisenbergiella   | massiliensis    |
| <b>seq420</b>  | Firmicutes    | Clostridia   | Eisenbergiella   | tayi            |
| <b>seq1812</b> | Firmicutes    | Clostridia   | Epulopiscium     |                 |
| <b>seq8</b>    | Firmicutes    | Clostridia   | Fusicatenibacter | saccharivorans  |
| <b>seq191</b>  | Firmicutes    | Clostridia   | Fusicatenibacter |                 |
| <b>seq500</b>  | Firmicutes    | Clostridia   | Fusicatenibacter |                 |
| <b>seq570</b>  | Firmicutes    | Clostridia   | Fusicatenibacter |                 |
| <b>seq965</b>  | Firmicutes    | Clostridia   | Fusicatenibacter |                 |
| <b>seq1033</b> | Firmicutes    | Clostridia   | Fusicatenibacter |                 |
| <b>seq1168</b> | Firmicutes    | Clostridia   | Fusicatenibacter |                 |
| <b>seq1184</b> | Firmicutes    | Clostridia   | Fusicatenibacter |                 |

Sequence Count Table

|                | <b>Phylum</b> | <b>Class</b> | <b>Subject34WK0</b> | <b>Subject34WK12</b> | <b>Subject16WK0</b> | <b>Subject16WK12</b> |
|----------------|---------------|--------------|---------------------|----------------------|---------------------|----------------------|
| <b>seq576</b>  | Firmicutes    | Clostridia   | 0                   | 0                    | 315                 | 270                  |
| <b>seq915</b>  | Firmicutes    | Clostridia   | 0                   | 0                    | 0                   | 0                    |
| <b>seq46</b>   | Firmicutes    | Clostridia   | 30                  | 653                  | 1530                | 599                  |
| <b>seq409</b>  | Firmicutes    | Clostridia   | 0                   | 0                    | 0                   | 0                    |
| <b>seq629</b>  | Firmicutes    | Clostridia   | 0                   | 0                    | 0                   | 0                    |
| <b>seq691</b>  | Firmicutes    | Clostridia   | 0                   | 0                    | 0                   | 0                    |
| <b>seq838</b>  | Firmicutes    | Clostridia   | 0                   | 0                    | 0                   | 0                    |
| <b>seq862</b>  | Firmicutes    | Clostridia   | 0                   | 0                    | 0                   | 0                    |
| <b>seq1023</b> | Firmicutes    | Clostridia   | 0                   | 0                    | 88                  | 46                   |
| <b>seq1142</b> | Firmicutes    | Clostridia   | 0                   | 0                    | 0                   | 0                    |
| <b>seq1202</b> | Firmicutes    | Clostridia   | 0                   | 0                    | 0                   | 0                    |
| <b>seq1568</b> | Firmicutes    | Clostridia   | 0                   | 0                    | 0                   | 0                    |
| <b>seq17</b>   | Firmicutes    | Clostridia   | 96                  | 2279                 | 2159                | 1357                 |
| <b>seq80</b>   | Firmicutes    | Clostridia   | 98                  | 588                  | 541                 | 165                  |
| <b>seq509</b>  | Firmicutes    | Clostridia   | 0                   | 287                  | 0                   | 0                    |
| <b>seq623</b>  | Firmicutes    | Clostridia   | 0                   | 0                    | 0                   | 0                    |
| <b>seq863</b>  | Firmicutes    | Clostridia   | 0                   | 0                    | 0                   | 0                    |
| <b>seq1116</b> | Firmicutes    | Clostridia   | 0                   | 0                    | 0                   | 0                    |
| <b>seq1140</b> | Firmicutes    | Clostridia   | 0                   | 0                    | 0                   | 0                    |
| <b>seq1175</b> | Firmicutes    | Clostridia   | 0                   | 0                    | 0                   | 0                    |
| <b>seq1208</b> | Firmicutes    | Clostridia   | 0                   | 0                    | 0                   | 0                    |
| <b>seq321</b>  | Firmicutes    | Clostridia   | 0                   | 0                    | 0                   | 0                    |
| <b>seq420</b>  | Firmicutes    | Clostridia   | 0                   | 0                    | 0                   | 0                    |
| <b>seq1812</b> | Firmicutes    | Clostridia   | 0                   | 0                    | 0                   | 0                    |
| <b>seq8</b>    | Firmicutes    | Clostridia   | 351                 | 1558                 | 840                 | 1731                 |
| <b>seq191</b>  | Firmicutes    | Clostridia   | 92                  | 302                  | 0                   | 0                    |
| <b>seq500</b>  | Firmicutes    | Clostridia   | 0                   | 0                    | 0                   | 0                    |
| <b>seq570</b>  | Firmicutes    | Clostridia   | 0                   | 0                    | 0                   | 0                    |
| <b>seq965</b>  | Firmicutes    | Clostridia   | 0                   | 0                    | 0                   | 0                    |
| <b>seq1033</b> | Firmicutes    | Clostridia   | 0                   | 0                    | 0                   | 0                    |
| <b>seq1168</b> | Firmicutes    | Clostridia   | 0                   | 0                    | 0                   | 0                    |
| <b>seq1184</b> | Firmicutes    | Clostridia   | 0                   | 0                    | 0                   | 0                    |

Sequence Count Table

|                | <b>Phylum</b> | <b>Class</b> | <b>Subject17WK0</b> | <b>Subject17WK12</b> | <b>Subject1WK0</b> | <b>Subject1WK12</b> |
|----------------|---------------|--------------|---------------------|----------------------|--------------------|---------------------|
| <b>seq576</b>  | Firmicutes    | Clostridia   | 0                   | 0                    | 0                  | 0                   |
| <b>seq915</b>  | Firmicutes    | Clostridia   | 0                   | 0                    | 0                  | 0                   |
| <b>seq46</b>   | Firmicutes    | Clostridia   | 396                 | 1990                 | 540                | 533                 |
| <b>seq409</b>  | Firmicutes    | Clostridia   | 0                   | 0                    | 0                  | 0                   |
| <b>seq629</b>  | Firmicutes    | Clostridia   | 0                   | 0                    | 129                | 143                 |
| <b>seq691</b>  | Firmicutes    | Clostridia   | 0                   | 0                    | 0                  | 0                   |
| <b>seq838</b>  | Firmicutes    | Clostridia   | 0                   | 0                    | 112                | 122                 |
| <b>seq862</b>  | Firmicutes    | Clostridia   | 0                   | 0                    | 0                  | 0                   |
| <b>seq1023</b> | Firmicutes    | Clostridia   | 0                   | 0                    | 0                  | 0                   |
| <b>seq1142</b> | Firmicutes    | Clostridia   | 0                   | 0                    | 0                  | 0                   |
| <b>seq1202</b> | Firmicutes    | Clostridia   | 0                   | 0                    | 0                  | 0                   |
| <b>seq1568</b> | Firmicutes    | Clostridia   | 0                   | 0                    | 0                  | 0                   |
| <b>seq17</b>   | Firmicutes    | Clostridia   | 221                 | 1225                 | 1016               | 907                 |
| <b>seq80</b>   | Firmicutes    | Clostridia   | 303                 | 411                  | 186                | 191                 |
| <b>seq509</b>  | Firmicutes    | Clostridia   | 0                   | 0                    | 0                  | 0                   |
| <b>seq623</b>  | Firmicutes    | Clostridia   | 0                   | 0                    | 0                  | 0                   |
| <b>seq863</b>  | Firmicutes    | Clostridia   | 0                   | 0                    | 0                  | 0                   |
| <b>seq1116</b> | Firmicutes    | Clostridia   | 0                   | 0                    | 0                  | 0                   |
| <b>seq1140</b> | Firmicutes    | Clostridia   | 0                   | 0                    | 0                  | 0                   |
| <b>seq1175</b> | Firmicutes    | Clostridia   | 0                   | 0                    | 0                  | 0                   |
| <b>seq1208</b> | Firmicutes    | Clostridia   | 0                   | 0                    | 0                  | 0                   |
| <b>seq321</b>  | Firmicutes    | Clostridia   | 0                   | 0                    | 22                 | 22                  |
| <b>seq420</b>  | Firmicutes    | Clostridia   | 0                   | 0                    | 0                  | 0                   |
| <b>seq1812</b> | Firmicutes    | Clostridia   | 0                   | 0                    | 0                  | 0                   |
| <b>seq8</b>    | Firmicutes    | Clostridia   | 289                 | 685                  | 2418               | 3010                |
| <b>seq191</b>  | Firmicutes    | Clostridia   | 0                   | 0                    | 0                  | 0                   |
| <b>seq500</b>  | Firmicutes    | Clostridia   | 0                   | 0                    | 0                  | 0                   |
| <b>seq570</b>  | Firmicutes    | Clostridia   | 0                   | 0                    | 0                  | 0                   |
| <b>seq965</b>  | Firmicutes    | Clostridia   | 0                   | 0                    | 0                  | 0                   |
| <b>seq1033</b> | Firmicutes    | Clostridia   | 0                   | 0                    | 0                  | 0                   |
| <b>seq1168</b> | Firmicutes    | Clostridia   | 0                   | 0                    | 0                  | 88                  |
| <b>seq1184</b> | Firmicutes    | Clostridia   | 0                   | 0                    | 0                  | 0                   |

Sequence Count Table

|                | <b>Phylum</b> | <b>Class</b> | <b>Subject2WK0</b> | <b>Subject2WK12</b> | <b>Subject3WK0</b> | <b>Subject3WK12</b> |
|----------------|---------------|--------------|--------------------|---------------------|--------------------|---------------------|
| <b>seq576</b>  | Firmicutes    | Clostridia   | 0                  | 0                   | 0                  | 0                   |
| <b>seq915</b>  | Firmicutes    | Clostridia   | 0                  | 0                   | 0                  | 0                   |
| <b>seq46</b>   | Firmicutes    | Clostridia   | 1241               | 1868                | 3852               | 1951                |
| <b>seq409</b>  | Firmicutes    | Clostridia   | 513                | 692                 | 0                  | 0                   |
| <b>seq629</b>  | Firmicutes    | Clostridia   | 0                  | 0                   | 0                  | 0                   |
| <b>seq691</b>  | Firmicutes    | Clostridia   | 0                  | 0                   | 0                  | 0                   |
| <b>seq838</b>  | Firmicutes    | Clostridia   | 0                  | 0                   | 0                  | 0                   |
| <b>seq862</b>  | Firmicutes    | Clostridia   | 0                  | 0                   | 0                  | 0                   |
| <b>seq1023</b> | Firmicutes    | Clostridia   | 0                  | 0                   | 0                  | 0                   |
| <b>seq1142</b> | Firmicutes    | Clostridia   | 0                  | 0                   | 0                  | 0                   |
| <b>seq1202</b> | Firmicutes    | Clostridia   | 0                  | 0                   | 0                  | 0                   |
| <b>seq1568</b> | Firmicutes    | Clostridia   | 0                  | 0                   | 0                  | 0                   |
| <b>seq17</b>   | Firmicutes    | Clostridia   | 1579               | 830                 | 7844               | 2094                |
| <b>seq80</b>   | Firmicutes    | Clostridia   | 0                  | 0                   | 0                  | 0                   |
| <b>seq509</b>  | Firmicutes    | Clostridia   | 0                  | 0                   | 0                  | 0                   |
| <b>seq623</b>  | Firmicutes    | Clostridia   | 0                  | 0                   | 0                  | 0                   |
| <b>seq863</b>  | Firmicutes    | Clostridia   | 0                  | 0                   | 0                  | 0                   |
| <b>seq1116</b> | Firmicutes    | Clostridia   | 0                  | 0                   | 0                  | 0                   |
| <b>seq1140</b> | Firmicutes    | Clostridia   | 0                  | 0                   | 0                  | 0                   |
| <b>seq1175</b> | Firmicutes    | Clostridia   | 0                  | 0                   | 0                  | 0                   |
| <b>seq1208</b> | Firmicutes    | Clostridia   | 0                  | 0                   | 0                  | 0                   |
| <b>seq321</b>  | Firmicutes    | Clostridia   | 0                  | 0                   | 0                  | 0                   |
| <b>seq420</b>  | Firmicutes    | Clostridia   | 18                 | 0                   | 0                  | 0                   |
| <b>seq1812</b> | Firmicutes    | Clostridia   | 0                  | 0                   | 0                  | 0                   |
| <b>seq8</b>    | Firmicutes    | Clostridia   | 3566               | 2384                | 0                  | 0                   |
| <b>seq191</b>  | Firmicutes    | Clostridia   | 682                | 592                 | 0                  | 0                   |
| <b>seq500</b>  | Firmicutes    | Clostridia   | 0                  | 0                   | 0                  | 0                   |
| <b>seq570</b>  | Firmicutes    | Clostridia   | 0                  | 0                   | 0                  | 0                   |
| <b>seq965</b>  | Firmicutes    | Clostridia   | 158                | 0                   | 0                  | 0                   |
| <b>seq1033</b> | Firmicutes    | Clostridia   | 0                  | 0                   | 0                  | 0                   |
| <b>seq1168</b> | Firmicutes    | Clostridia   | 0                  | 0                   | 0                  | 0                   |
| <b>seq1184</b> | Firmicutes    | Clostridia   | 0                  | 0                   | 0                  | 0                   |

Sequence Count Table

|                | <b>Phylum</b> | <b>Class</b> | <b>Subject4WK0</b> | <b>Subject4WK12</b> | <b>Subject5WK0</b> | <b>Subject5WK12</b> |
|----------------|---------------|--------------|--------------------|---------------------|--------------------|---------------------|
| <b>seq576</b>  | Firmicutes    | Clostridia   | 0                  | 0                   | 0                  | 0                   |
| <b>seq915</b>  | Firmicutes    | Clostridia   | 0                  | 0                   | 0                  | 0                   |
| <b>seq46</b>   | Firmicutes    | Clostridia   | 1769               | 712                 | 0                  | 0                   |
| <b>seq409</b>  | Firmicutes    | Clostridia   | 0                  | 0                   | 0                  | 0                   |
| <b>seq629</b>  | Firmicutes    | Clostridia   | 0                  | 0                   | 0                  | 0                   |
| <b>seq691</b>  | Firmicutes    | Clostridia   | 0                  | 0                   | 0                  | 0                   |
| <b>seq838</b>  | Firmicutes    | Clostridia   | 0                  | 0                   | 0                  | 0                   |
| <b>seq862</b>  | Firmicutes    | Clostridia   | 0                  | 0                   | 0                  | 0                   |
| <b>seq1023</b> | Firmicutes    | Clostridia   | 0                  | 0                   | 0                  | 0                   |
| <b>seq1142</b> | Firmicutes    | Clostridia   | 94                 | 0                   | 0                  | 0                   |
| <b>seq1202</b> | Firmicutes    | Clostridia   | 0                  | 0                   | 0                  | 0                   |
| <b>seq1568</b> | Firmicutes    | Clostridia   | 0                  | 0                   | 0                  | 0                   |
| <b>seq17</b>   | Firmicutes    | Clostridia   | 2523               | 1560                | 0                  | 0                   |
| <b>seq80</b>   | Firmicutes    | Clostridia   | 285                | 176                 | 538                | 723                 |
| <b>seq509</b>  | Firmicutes    | Clostridia   | 0                  | 0                   | 0                  | 0                   |
| <b>seq623</b>  | Firmicutes    | Clostridia   | 0                  | 0                   | 0                  | 0                   |
| <b>seq863</b>  | Firmicutes    | Clostridia   | 0                  | 0                   | 0                  | 0                   |
| <b>seq1116</b> | Firmicutes    | Clostridia   | 0                  | 0                   | 0                  | 0                   |
| <b>seq1140</b> | Firmicutes    | Clostridia   | 0                  | 0                   | 0                  | 0                   |
| <b>seq1175</b> | Firmicutes    | Clostridia   | 0                  | 0                   | 0                  | 0                   |
| <b>seq1208</b> | Firmicutes    | Clostridia   | 0                  | 0                   | 0                  | 0                   |
| <b>seq321</b>  | Firmicutes    | Clostridia   | 16                 | 0                   | 0                  | 0                   |
| <b>seq420</b>  | Firmicutes    | Clostridia   | 0                  | 86                  | 0                  | 19                  |
| <b>seq1812</b> | Firmicutes    | Clostridia   | 0                  | 0                   | 0                  | 0                   |
| <b>seq8</b>    | Firmicutes    | Clostridia   | 5011               | 1998                | 2735               | 2872                |
| <b>seq191</b>  | Firmicutes    | Clostridia   | 0                  | 0                   | 0                  | 0                   |
| <b>seq500</b>  | Firmicutes    | Clostridia   | 0                  | 0                   | 340                | 450                 |
| <b>seq570</b>  | Firmicutes    | Clostridia   | 0                  | 0                   | 123                | 0                   |
| <b>seq965</b>  | Firmicutes    | Clostridia   | 0                  | 0                   | 0                  | 0                   |
| <b>seq1033</b> | Firmicutes    | Clostridia   | 0                  | 0                   | 0                  | 0                   |
| <b>seq1168</b> | Firmicutes    | Clostridia   | 0                  | 0                   | 0                  | 0                   |
| <b>seq1184</b> | Firmicutes    | Clostridia   | 0                  | 0                   | 0                  | 0                   |



Sequence Count Table

|                | <b>Phylum</b> | <b>Class</b> | <b>Subject6WK0</b> | <b>Subject6WK12</b> | <b>Subject18WK0</b> | <b>Subject18WK12</b> |
|----------------|---------------|--------------|--------------------|---------------------|---------------------|----------------------|
| <b>seq576</b>  | Firmicutes    | Clostridia   | 0                  | 0                   | 0                   | 0                    |
| <b>seq915</b>  | Firmicutes    | Clostridia   | 0                  | 0                   | 0                   | 0                    |
| <b>seq46</b>   | Firmicutes    | Clostridia   | 756                | 802                 | 1097                | 579                  |
| <b>seq409</b>  | Firmicutes    | Clostridia   | 0                  | 0                   | 0                   | 0                    |
| <b>seq629</b>  | Firmicutes    | Clostridia   | 0                  | 0                   | 0                   | 0                    |
| <b>seq691</b>  | Firmicutes    | Clostridia   | 0                  | 0                   | 0                   | 0                    |
| <b>seq838</b>  | Firmicutes    | Clostridia   | 0                  | 0                   | 0                   | 0                    |
| <b>seq862</b>  | Firmicutes    | Clostridia   | 0                  | 0                   | 0                   | 0                    |
| <b>seq1023</b> | Firmicutes    | Clostridia   | 0                  | 0                   | 0                   | 0                    |
| <b>seq1142</b> | Firmicutes    | Clostridia   | 0                  | 0                   | 0                   | 0                    |
| <b>seq1202</b> | Firmicutes    | Clostridia   | 0                  | 0                   | 79                  | 0                    |
| <b>seq1568</b> | Firmicutes    | Clostridia   | 0                  | 0                   | 0                   | 0                    |
| <b>seq17</b>   | Firmicutes    | Clostridia   | 812                | 1371                | 2617                | 1116                 |
| <b>seq80</b>   | Firmicutes    | Clostridia   | 113                | 177                 | 312                 | 303                  |
| <b>seq509</b>  | Firmicutes    | Clostridia   | 0                  | 0                   | 0                   | 0                    |
| <b>seq623</b>  | Firmicutes    | Clostridia   | 0                  | 0                   | 0                   | 0                    |
| <b>seq863</b>  | Firmicutes    | Clostridia   | 0                  | 0                   | 0                   | 0                    |
| <b>seq1116</b> | Firmicutes    | Clostridia   | 0                  | 0                   | 0                   | 0                    |
| <b>seq1140</b> | Firmicutes    | Clostridia   | 0                  | 0                   | 0                   | 0                    |
| <b>seq1175</b> | Firmicutes    | Clostridia   | 0                  | 0                   | 0                   | 0                    |
| <b>seq1208</b> | Firmicutes    | Clostridia   | 0                  | 0                   | 0                   | 0                    |
| <b>seq321</b>  | Firmicutes    | Clostridia   | 0                  | 0                   | 0                   | 0                    |
| <b>seq420</b>  | Firmicutes    | Clostridia   | 0                  | 0                   | 14                  | 0                    |
| <b>seq1812</b> | Firmicutes    | Clostridia   | 0                  | 0                   | 0                   | 0                    |
| <b>seq8</b>    | Firmicutes    | Clostridia   | 2121               | 2816                | 5413                | 2483                 |
| <b>seq191</b>  | Firmicutes    | Clostridia   | 334                | 227                 | 0                   | 0                    |
| <b>seq500</b>  | Firmicutes    | Clostridia   | 0                  | 0                   | 0                   | 0                    |
| <b>seq570</b>  | Firmicutes    | Clostridia   | 0                  | 0                   | 0                   | 0                    |
| <b>seq965</b>  | Firmicutes    | Clostridia   | 0                  | 0                   | 0                   | 0                    |
| <b>seq1033</b> | Firmicutes    | Clostridia   | 0                  | 0                   | 0                   | 0                    |
| <b>seq1168</b> | Firmicutes    | Clostridia   | 0                  | 0                   | 0                   | 0                    |
| <b>seq1184</b> | Firmicutes    | Clostridia   | 0                  | 0                   | 0                   | 0                    |

Sequence Count Table

|                | <b>Phylum</b> | <b>Class</b> | <b>Subject19WK0</b> | <b>Subject19WK12</b> | <b>Subject20WK0</b> | <b>Subject20WK12</b> |
|----------------|---------------|--------------|---------------------|----------------------|---------------------|----------------------|
| <b>seq576</b>  | Firmicutes    | Clostridia   | 0                   | 0                    | 0                   | 0                    |
| <b>seq915</b>  | Firmicutes    | Clostridia   | 0                   | 0                    | 0                   | 0                    |
| <b>seq46</b>   | Firmicutes    | Clostridia   | 1127                | 1522                 | 671                 | 802                  |
| <b>seq409</b>  | Firmicutes    | Clostridia   | 0                   | 0                    | 0                   | 0                    |
| <b>seq629</b>  | Firmicutes    | Clostridia   | 0                   | 0                    | 0                   | 0                    |
| <b>seq691</b>  | Firmicutes    | Clostridia   | 0                   | 0                    | 0                   | 0                    |
| <b>seq838</b>  | Firmicutes    | Clostridia   | 0                   | 0                    | 0                   | 0                    |
| <b>seq862</b>  | Firmicutes    | Clostridia   | 0                   | 0                    | 0                   | 0                    |
| <b>seq1023</b> | Firmicutes    | Clostridia   | 0                   | 0                    | 0                   | 0                    |
| <b>seq1142</b> | Firmicutes    | Clostridia   | 0                   | 0                    | 0                   | 0                    |
| <b>seq1202</b> | Firmicutes    | Clostridia   | 0                   | 0                    | 0                   | 0                    |
| <b>seq1568</b> | Firmicutes    | Clostridia   | 0                   | 0                    | 0                   | 0                    |
| <b>seq17</b>   | Firmicutes    | Clostridia   | 2599                | 2273                 | 1233                | 1438                 |
| <b>seq80</b>   | Firmicutes    | Clostridia   | 750                 | 362                  | 272                 | 627                  |
| <b>seq509</b>  | Firmicutes    | Clostridia   | 0                   | 0                    | 0                   | 0                    |
| <b>seq623</b>  | Firmicutes    | Clostridia   | 0                   | 0                    | 353                 | 0                    |
| <b>seq863</b>  | Firmicutes    | Clostridia   | 142                 | 76                   | 0                   | 0                    |
| <b>seq1116</b> | Firmicutes    | Clostridia   | 0                   | 0                    | 0                   | 0                    |
| <b>seq1140</b> | Firmicutes    | Clostridia   | 0                   | 0                    | 0                   | 0                    |
| <b>seq1175</b> | Firmicutes    | Clostridia   | 0                   | 0                    | 0                   | 0                    |
| <b>seq1208</b> | Firmicutes    | Clostridia   | 0                   | 0                    | 0                   | 0                    |
| <b>seq321</b>  | Firmicutes    | Clostridia   | 30                  | 39                   | 0                   | 0                    |
| <b>seq420</b>  | Firmicutes    | Clostridia   | 0                   | 0                    | 8                   | 0                    |
| <b>seq1812</b> | Firmicutes    | Clostridia   | 0                   | 0                    | 7                   | 0                    |
| <b>seq8</b>    | Firmicutes    | Clostridia   | 5918                | 5985                 | 497                 | 566                  |
| <b>seq191</b>  | Firmicutes    | Clostridia   | 0                   | 0                    | 0                   | 0                    |
| <b>seq500</b>  | Firmicutes    | Clostridia   | 0                   | 0                    | 0                   | 0                    |
| <b>seq570</b>  | Firmicutes    | Clostridia   | 0                   | 0                    | 0                   | 0                    |
| <b>seq965</b>  | Firmicutes    | Clostridia   | 0                   | 0                    | 0                   | 0                    |
| <b>seq1033</b> | Firmicutes    | Clostridia   | 0                   | 0                    | 0                   | 0                    |
| <b>seq1168</b> | Firmicutes    | Clostridia   | 0                   | 0                    | 0                   | 0                    |
| <b>seq1184</b> | Firmicutes    | Clostridia   | 0                   | 0                    | 85                  | 0                    |

Sequence Count Table

|                | <b>Phylum</b> | <b>Class</b> | <b>Subject7WK0</b> | <b>Subject7WK12</b> | <b>Subject21WK0</b> | <b>Subject21WK12</b> |
|----------------|---------------|--------------|--------------------|---------------------|---------------------|----------------------|
| <b>seq576</b>  | Firmicutes    | Clostridia   | 0                  | 0                   | 0                   | 0                    |
| <b>seq915</b>  | Firmicutes    | Clostridia   | 0                  | 0                   | 0                   | 0                    |
| <b>seq46</b>   | Firmicutes    | Clostridia   | 0                  | 0                   | 0                   | 0                    |
| <b>seq409</b>  | Firmicutes    | Clostridia   | 0                  | 0                   | 0                   | 0                    |
| <b>seq629</b>  | Firmicutes    | Clostridia   | 0                  | 0                   | 0                   | 0                    |
| <b>seq691</b>  | Firmicutes    | Clostridia   | 0                  | 0                   | 0                   | 0                    |
| <b>seq838</b>  | Firmicutes    | Clostridia   | 0                  | 0                   | 0                   | 0                    |
| <b>seq862</b>  | Firmicutes    | Clostridia   | 0                  | 0                   | 0                   | 0                    |
| <b>seq1023</b> | Firmicutes    | Clostridia   | 0                  | 0                   | 0                   | 0                    |
| <b>seq1142</b> | Firmicutes    | Clostridia   | 0                  | 0                   | 0                   | 0                    |
| <b>seq1202</b> | Firmicutes    | Clostridia   | 0                  | 0                   | 0                   | 0                    |
| <b>seq1568</b> | Firmicutes    | Clostridia   | 0                  | 0                   | 0                   | 0                    |
| <b>seq17</b>   | Firmicutes    | Clostridia   | 3354               | 2782                | 0                   | 0                    |
| <b>seq80</b>   | Firmicutes    | Clostridia   | 420                | 358                 | 0                   | 0                    |
| <b>seq509</b>  | Firmicutes    | Clostridia   | 0                  | 0                   | 0                   | 0                    |
| <b>seq623</b>  | Firmicutes    | Clostridia   | 0                  | 0                   | 0                   | 0                    |
| <b>seq863</b>  | Firmicutes    | Clostridia   | 0                  | 0                   | 0                   | 0                    |
| <b>seq1116</b> | Firmicutes    | Clostridia   | 0                  | 102                 | 0                   | 0                    |
| <b>seq1140</b> | Firmicutes    | Clostridia   | 0                  | 0                   | 0                   | 0                    |
| <b>seq1175</b> | Firmicutes    | Clostridia   | 0                  | 0                   | 0                   | 0                    |
| <b>seq1208</b> | Firmicutes    | Clostridia   | 0                  | 0                   | 0                   | 0                    |
| <b>seq321</b>  | Firmicutes    | Clostridia   | 0                  | 0                   | 0                   | 0                    |
| <b>seq420</b>  | Firmicutes    | Clostridia   | 0                  | 11                  | 42                  | 21                   |
| <b>seq1812</b> | Firmicutes    | Clostridia   | 0                  | 0                   | 0                   | 0                    |
| <b>seq8</b>    | Firmicutes    | Clostridia   | 10741              | 5313                | 0                   | 0                    |
| <b>seq191</b>  | Firmicutes    | Clostridia   | 1819               | 851                 | 0                   | 0                    |
| <b>seq500</b>  | Firmicutes    | Clostridia   | 0                  | 0                   | 0                   | 0                    |
| <b>seq570</b>  | Firmicutes    | Clostridia   | 0                  | 0                   | 0                   | 0                    |
| <b>seq965</b>  | Firmicutes    | Clostridia   | 0                  | 0                   | 0                   | 0                    |
| <b>seq1033</b> | Firmicutes    | Clostridia   | 0                  | 0                   | 0                   | 0                    |
| <b>seq1168</b> | Firmicutes    | Clostridia   | 0                  | 0                   | 0                   | 0                    |
| <b>seq1184</b> | Firmicutes    | Clostridia   | 0                  | 0                   | 0                   | 0                    |

Sequence Count Table

|                | <b>Phylum</b> | <b>Class</b> | <b>Subject8WK0</b> | <b>Subject8WK12</b> | <b>Subject9WK0</b> | <b>Subject9WK12</b> |
|----------------|---------------|--------------|--------------------|---------------------|--------------------|---------------------|
| <b>seq576</b>  | Firmicutes    | Clostridia   | 0                  | 0                   | 0                  | 0                   |
| <b>seq915</b>  | Firmicutes    | Clostridia   | 0                  | 0                   | 0                  | 0                   |
| <b>seq46</b>   | Firmicutes    | Clostridia   | 598                | 1149                | 313                | 410                 |
| <b>seq409</b>  | Firmicutes    | Clostridia   | 0                  | 0                   | 0                  | 0                   |
| <b>seq629</b>  | Firmicutes    | Clostridia   | 0                  | 0                   | 0                  | 0                   |
| <b>seq691</b>  | Firmicutes    | Clostridia   | 0                  | 0                   | 0                  | 0                   |
| <b>seq838</b>  | Firmicutes    | Clostridia   | 0                  | 0                   | 0                  | 0                   |
| <b>seq862</b>  | Firmicutes    | Clostridia   | 0                  | 0                   | 0                  | 0                   |
| <b>seq1023</b> | Firmicutes    | Clostridia   | 0                  | 0                   | 0                  | 0                   |
| <b>seq1142</b> | Firmicutes    | Clostridia   | 0                  | 0                   | 0                  | 0                   |
| <b>seq1202</b> | Firmicutes    | Clostridia   | 0                  | 0                   | 0                  | 0                   |
| <b>seq1568</b> | Firmicutes    | Clostridia   | 0                  | 0                   | 0                  | 0                   |
| <b>seq17</b>   | Firmicutes    | Clostridia   | 2011               | 2158                | 1823               | 2631                |
| <b>seq80</b>   | Firmicutes    | Clostridia   | 863                | 1322                | 448                | 444                 |
| <b>seq509</b>  | Firmicutes    | Clostridia   | 240                | 239                 | 0                  | 0                   |
| <b>seq623</b>  | Firmicutes    | Clostridia   | 0                  | 0                   | 0                  | 0                   |
| <b>seq863</b>  | Firmicutes    | Clostridia   | 0                  | 0                   | 0                  | 0                   |
| <b>seq1116</b> | Firmicutes    | Clostridia   | 0                  | 0                   | 0                  | 0                   |
| <b>seq1140</b> | Firmicutes    | Clostridia   | 0                  | 0                   | 0                  | 0                   |
| <b>seq1175</b> | Firmicutes    | Clostridia   | 0                  | 0                   | 0                  | 0                   |
| <b>seq1208</b> | Firmicutes    | Clostridia   | 0                  | 0                   | 0                  | 0                   |
| <b>seq321</b>  | Firmicutes    | Clostridia   | 40                 | 32                  | 141                | 0                   |
| <b>seq420</b>  | Firmicutes    | Clostridia   | 0                  | 0                   | 0                  | 0                   |
| <b>seq1812</b> | Firmicutes    | Clostridia   | 0                  | 0                   | 0                  | 0                   |
| <b>seq8</b>    | Firmicutes    | Clostridia   | 3516               | 4296                | 593                | 172                 |
| <b>seq191</b>  | Firmicutes    | Clostridia   | 0                  | 0                   | 0                  | 0                   |
| <b>seq500</b>  | Firmicutes    | Clostridia   | 0                  | 0                   | 0                  | 0                   |
| <b>seq570</b>  | Firmicutes    | Clostridia   | 0                  | 0                   | 0                  | 0                   |
| <b>seq965</b>  | Firmicutes    | Clostridia   | 0                  | 0                   | 0                  | 0                   |
| <b>seq1033</b> | Firmicutes    | Clostridia   | 0                  | 0                   | 0                  | 0                   |
| <b>seq1168</b> | Firmicutes    | Clostridia   | 0                  | 0                   | 0                  | 0                   |
| <b>seq1184</b> | Firmicutes    | Clostridia   | 0                  | 0                   | 0                  | 0                   |

Sequence Count Table

|                | <b>Phylum</b> | <b>Class</b> | <b>Subject10WK0</b> | <b>Subject10WK12</b> | <b>Subject22WK0</b> | <b>Subject22WK12</b> |
|----------------|---------------|--------------|---------------------|----------------------|---------------------|----------------------|
| <b>seq576</b>  | Firmicutes    | Clostridia   | 0                   | 0                    | 0                   | 0                    |
| <b>seq915</b>  | Firmicutes    | Clostridia   | 0                   | 0                    | 0                   | 0                    |
| <b>seq46</b>   | Firmicutes    | Clostridia   | 0                   | 0                    | 1269                | 669                  |
| <b>seq409</b>  | Firmicutes    | Clostridia   | 0                   | 0                    | 0                   | 0                    |
| <b>seq629</b>  | Firmicutes    | Clostridia   | 0                   | 0                    | 0                   | 0                    |
| <b>seq691</b>  | Firmicutes    | Clostridia   | 0                   | 0                    | 0                   | 0                    |
| <b>seq838</b>  | Firmicutes    | Clostridia   | 0                   | 0                    | 0                   | 0                    |
| <b>seq862</b>  | Firmicutes    | Clostridia   | 0                   | 0                    | 0                   | 0                    |
| <b>seq1023</b> | Firmicutes    | Clostridia   | 0                   | 0                    | 0                   | 0                    |
| <b>seq1142</b> | Firmicutes    | Clostridia   | 0                   | 0                    | 0                   | 0                    |
| <b>seq1202</b> | Firmicutes    | Clostridia   | 0                   | 0                    | 0                   | 0                    |
| <b>seq1568</b> | Firmicutes    | Clostridia   | 22                  | 0                    | 0                   | 0                    |
| <b>seq17</b>   | Firmicutes    | Clostridia   | 0                   | 0                    | 1439                | 658                  |
| <b>seq80</b>   | Firmicutes    | Clostridia   | 0                   | 0                    | 381                 | 142                  |
| <b>seq509</b>  | Firmicutes    | Clostridia   | 0                   | 0                    | 0                   | 0                    |
| <b>seq623</b>  | Firmicutes    | Clostridia   | 0                   | 0                    | 0                   | 0                    |
| <b>seq863</b>  | Firmicutes    | Clostridia   | 0                   | 0                    | 0                   | 0                    |
| <b>seq1116</b> | Firmicutes    | Clostridia   | 0                   | 0                    | 0                   | 0                    |
| <b>seq1140</b> | Firmicutes    | Clostridia   | 0                   | 0                    | 0                   | 0                    |
| <b>seq1175</b> | Firmicutes    | Clostridia   | 0                   | 0                    | 0                   | 0                    |
| <b>seq1208</b> | Firmicutes    | Clostridia   | 0                   | 0                    | 0                   | 0                    |
| <b>seq321</b>  | Firmicutes    | Clostridia   | 329                 | 176                  | 0                   | 0                    |
| <b>seq420</b>  | Firmicutes    | Clostridia   | 0                   | 0                    | 6                   | 0                    |
| <b>seq1812</b> | Firmicutes    | Clostridia   | 0                   | 0                    | 0                   | 0                    |
| <b>seq8</b>    | Firmicutes    | Clostridia   | 509                 | 489                  | 1254                | 755                  |
| <b>seq191</b>  | Firmicutes    | Clostridia   | 0                   | 0                    | 0                   | 0                    |
| <b>seq500</b>  | Firmicutes    | Clostridia   | 0                   | 0                    | 0                   | 0                    |
| <b>seq570</b>  | Firmicutes    | Clostridia   | 0                   | 0                    | 0                   | 0                    |
| <b>seq965</b>  | Firmicutes    | Clostridia   | 0                   | 0                    | 0                   | 0                    |
| <b>seq1033</b> | Firmicutes    | Clostridia   | 0                   | 0                    | 0                   | 0                    |
| <b>seq1168</b> | Firmicutes    | Clostridia   | 0                   | 0                    | 0                   | 0                    |
| <b>seq1184</b> | Firmicutes    | Clostridia   | 0                   | 0                    | 0                   | 0                    |

Sequence Count Table

|                | <b>Phylum</b> | <b>Class</b> | <b>Subject23WK0</b> | <b>Subject23WK12</b> | <b>Subject24WK0</b> | <b>Subject24WK12</b> |
|----------------|---------------|--------------|---------------------|----------------------|---------------------|----------------------|
| <b>seq576</b>  | Firmicutes    | Clostridia   | 0                   | 0                    | 0                   | 0                    |
| <b>seq915</b>  | Firmicutes    | Clostridia   | 0                   | 0                    | 186                 | 0                    |
| <b>seq46</b>   | Firmicutes    | Clostridia   | 684                 | 1099                 | 829                 | 570                  |
| <b>seq409</b>  | Firmicutes    | Clostridia   | 0                   | 0                    | 0                   | 0                    |
| <b>seq629</b>  | Firmicutes    | Clostridia   | 0                   | 0                    | 223                 | 0                    |
| <b>seq691</b>  | Firmicutes    | Clostridia   | 0                   | 0                    | 0                   | 0                    |
| <b>seq838</b>  | Firmicutes    | Clostridia   | 0                   | 0                    | 0                   | 0                    |
| <b>seq862</b>  | Firmicutes    | Clostridia   | 0                   | 0                    | 0                   | 0                    |
| <b>seq1023</b> | Firmicutes    | Clostridia   | 0                   | 0                    | 0                   | 0                    |
| <b>seq1142</b> | Firmicutes    | Clostridia   | 0                   | 0                    | 0                   | 0                    |
| <b>seq1202</b> | Firmicutes    | Clostridia   | 0                   | 0                    | 0                   | 0                    |
| <b>seq1568</b> | Firmicutes    | Clostridia   | 0                   | 0                    | 0                   | 0                    |
| <b>seq17</b>   | Firmicutes    | Clostridia   | 1686                | 1915                 | 2926                | 2221                 |
| <b>seq80</b>   | Firmicutes    | Clostridia   | 403                 | 289                  | 420                 | 628                  |
| <b>seq509</b>  | Firmicutes    | Clostridia   | 0                   | 0                    | 0                   | 0                    |
| <b>seq623</b>  | Firmicutes    | Clostridia   | 0                   | 0                    | 0                   | 0                    |
| <b>seq863</b>  | Firmicutes    | Clostridia   | 0                   | 0                    | 0                   | 0                    |
| <b>seq1116</b> | Firmicutes    | Clostridia   | 0                   | 0                    | 0                   | 0                    |
| <b>seq1140</b> | Firmicutes    | Clostridia   | 0                   | 0                    | 0                   | 0                    |
| <b>seq1175</b> | Firmicutes    | Clostridia   | 0                   | 0                    | 87                  | 0                    |
| <b>seq1208</b> | Firmicutes    | Clostridia   | 0                   | 0                    | 0                   | 0                    |
| <b>seq321</b>  | Firmicutes    | Clostridia   | 0                   | 0                    | 0                   | 0                    |
| <b>seq420</b>  | Firmicutes    | Clostridia   | 0                   | 0                    | 0                   | 0                    |
| <b>seq1812</b> | Firmicutes    | Clostridia   | 0                   | 0                    | 0                   | 0                    |
| <b>seq8</b>    | Firmicutes    | Clostridia   | 1469                | 1485                 | 6491                | 412                  |
| <b>seq191</b>  | Firmicutes    | Clostridia   | 0                   | 0                    | 0                   | 0                    |
| <b>seq500</b>  | Firmicutes    | Clostridia   | 0                   | 0                    | 0                   | 0                    |
| <b>seq570</b>  | Firmicutes    | Clostridia   | 0                   | 0                    | 0                   | 0                    |
| <b>seq965</b>  | Firmicutes    | Clostridia   | 0                   | 0                    | 0                   | 0                    |
| <b>seq1033</b> | Firmicutes    | Clostridia   | 0                   | 0                    | 0                   | 0                    |
| <b>seq1168</b> | Firmicutes    | Clostridia   | 0                   | 0                    | 0                   | 0                    |
| <b>seq1184</b> | Firmicutes    | Clostridia   | 0                   | 0                    | 0                   | 0                    |

Sequence Count Table

|                | <b>Phylum</b> | <b>Class</b> | <b>Subject11WK0</b> | <b>Subject11WK12</b> | <b>Subject12WK0</b> | <b>Subject12WK12</b> |
|----------------|---------------|--------------|---------------------|----------------------|---------------------|----------------------|
| <b>seq576</b>  | Firmicutes    | Clostridia   | 0                   | 0                    | 0                   | 0                    |
| <b>seq915</b>  | Firmicutes    | Clostridia   | 0                   | 0                    | 0                   | 0                    |
| <b>seq46</b>   | Firmicutes    | Clostridia   | 0                   | 0                    | 442                 | 672                  |
| <b>seq409</b>  | Firmicutes    | Clostridia   | 0                   | 0                    | 0                   | 0                    |
| <b>seq629</b>  | Firmicutes    | Clostridia   | 0                   | 0                    | 0                   | 0                    |
| <b>seq691</b>  | Firmicutes    | Clostridia   | 0                   | 0                    | 0                   | 0                    |
| <b>seq838</b>  | Firmicutes    | Clostridia   | 0                   | 0                    | 0                   | 0                    |
| <b>seq862</b>  | Firmicutes    | Clostridia   | 0                   | 0                    | 0                   | 0                    |
| <b>seq1023</b> | Firmicutes    | Clostridia   | 0                   | 0                    | 0                   | 0                    |
| <b>seq1142</b> | Firmicutes    | Clostridia   | 0                   | 0                    | 0                   | 0                    |
| <b>seq1202</b> | Firmicutes    | Clostridia   | 0                   | 0                    | 0                   | 0                    |
| <b>seq1568</b> | Firmicutes    | Clostridia   | 0                   | 0                    | 0                   | 0                    |
| <b>seq17</b>   | Firmicutes    | Clostridia   | 0                   | 0                    | 719                 | 1420                 |
| <b>seq80</b>   | Firmicutes    | Clostridia   | 0                   | 0                    | 304                 | 662                  |
| <b>seq509</b>  | Firmicutes    | Clostridia   | 0                   | 0                    | 0                   | 0                    |
| <b>seq623</b>  | Firmicutes    | Clostridia   | 0                   | 0                    | 0                   | 0                    |
| <b>seq863</b>  | Firmicutes    | Clostridia   | 0                   | 0                    | 0                   | 0                    |
| <b>seq1116</b> | Firmicutes    | Clostridia   | 0                   | 0                    | 0                   | 0                    |
| <b>seq1140</b> | Firmicutes    | Clostridia   | 0                   | 0                    | 0                   | 96                   |
| <b>seq1175</b> | Firmicutes    | Clostridia   | 0                   | 0                    | 0                   | 0                    |
| <b>seq1208</b> | Firmicutes    | Clostridia   | 0                   | 0                    | 0                   | 0                    |
| <b>seq321</b>  | Firmicutes    | Clostridia   | 110                 | 40                   | 0                   | 0                    |
| <b>seq420</b>  | Firmicutes    | Clostridia   | 0                   | 0                    | 0                   | 0                    |
| <b>seq1812</b> | Firmicutes    | Clostridia   | 0                   | 0                    | 0                   | 0                    |
| <b>seq8</b>    | Firmicutes    | Clostridia   | 0                   | 0                    | 1145                | 1369                 |
| <b>seq191</b>  | Firmicutes    | Clostridia   | 0                   | 0                    | 233                 | 307                  |
| <b>seq500</b>  | Firmicutes    | Clostridia   | 0                   | 0                    | 0                   | 0                    |
| <b>seq570</b>  | Firmicutes    | Clostridia   | 0                   | 0                    | 0                   | 0                    |
| <b>seq965</b>  | Firmicutes    | Clostridia   | 0                   | 0                    | 0                   | 0                    |
| <b>seq1033</b> | Firmicutes    | Clostridia   | 0                   | 0                    | 0                   | 0                    |
| <b>seq1168</b> | Firmicutes    | Clostridia   | 0                   | 0                    | 0                   | 0                    |
| <b>seq1184</b> | Firmicutes    | Clostridia   | 0                   | 0                    | 0                   | 0                    |

Sequence Count Table

|                | <b>Phylum</b> | <b>Class</b> | <b>Subject25WK0</b> | <b>Subject25WK12</b> | <b>Subject38WK0</b> | <b>Subject38WK12</b> |
|----------------|---------------|--------------|---------------------|----------------------|---------------------|----------------------|
| <b>seq576</b>  | Firmicutes    | Clostridia   | 0                   | 0                    | 0                   | 0                    |
| <b>seq915</b>  | Firmicutes    | Clostridia   | 0                   | 0                    | 0                   | 0                    |
| <b>seq46</b>   | Firmicutes    | Clostridia   | 875                 | 578                  | 0                   | 0                    |
| <b>seq409</b>  | Firmicutes    | Clostridia   | 0                   | 0                    | 0                   | 0                    |
| <b>seq629</b>  | Firmicutes    | Clostridia   | 0                   | 0                    | 0                   | 0                    |
| <b>seq691</b>  | Firmicutes    | Clostridia   | 0                   | 0                    | 0                   | 0                    |
| <b>seq838</b>  | Firmicutes    | Clostridia   | 0                   | 0                    | 0                   | 0                    |
| <b>seq862</b>  | Firmicutes    | Clostridia   | 129                 | 90                   | 0                   | 0                    |
| <b>seq1023</b> | Firmicutes    | Clostridia   | 0                   | 0                    | 0                   | 0                    |
| <b>seq1142</b> | Firmicutes    | Clostridia   | 0                   | 0                    | 0                   | 0                    |
| <b>seq1202</b> | Firmicutes    | Clostridia   | 0                   | 0                    | 0                   | 0                    |
| <b>seq1568</b> | Firmicutes    | Clostridia   | 0                   | 0                    | 0                   | 0                    |
| <b>seq17</b>   | Firmicutes    | Clostridia   | 1435                | 414                  | 0                   | 0                    |
| <b>seq80</b>   | Firmicutes    | Clostridia   | 430                 | 65                   | 0                   | 0                    |
| <b>seq509</b>  | Firmicutes    | Clostridia   | 0                   | 0                    | 0                   | 0                    |
| <b>seq623</b>  | Firmicutes    | Clostridia   | 146                 | 0                    | 0                   | 0                    |
| <b>seq863</b>  | Firmicutes    | Clostridia   | 0                   | 0                    | 0                   | 0                    |
| <b>seq1116</b> | Firmicutes    | Clostridia   | 0                   | 0                    | 0                   | 0                    |
| <b>seq1140</b> | Firmicutes    | Clostridia   | 0                   | 0                    | 0                   | 0                    |
| <b>seq1175</b> | Firmicutes    | Clostridia   | 0                   | 0                    | 0                   | 0                    |
| <b>seq1208</b> | Firmicutes    | Clostridia   | 0                   | 0                    | 0                   | 0                    |
| <b>seq321</b>  | Firmicutes    | Clostridia   | 0                   | 0                    | 0                   | 0                    |
| <b>seq420</b>  | Firmicutes    | Clostridia   | 0                   | 0                    | 0                   | 0                    |
| <b>seq1812</b> | Firmicutes    | Clostridia   | 0                   | 0                    | 0                   | 0                    |
| <b>seq8</b>    | Firmicutes    | Clostridia   | 1415                | 330                  | 0                   | 0                    |
| <b>seq191</b>  | Firmicutes    | Clostridia   | 0                   | 0                    | 0                   | 0                    |
| <b>seq500</b>  | Firmicutes    | Clostridia   | 0                   | 0                    | 0                   | 0                    |
| <b>seq570</b>  | Firmicutes    | Clostridia   | 0                   | 0                    | 0                   | 0                    |
| <b>seq965</b>  | Firmicutes    | Clostridia   | 0                   | 0                    | 0                   | 0                    |
| <b>seq1033</b> | Firmicutes    | Clostridia   | 0                   | 0                    | 0                   | 0                    |
| <b>seq1168</b> | Firmicutes    | Clostridia   | 0                   | 0                    | 0                   | 0                    |
| <b>seq1184</b> | Firmicutes    | Clostridia   | 0                   | 0                    | 0                   | 0                    |



Sequence Count Table

|                | <b>Phylum</b> | <b>Class</b> | <b>Subject31WK0</b> | <b>Subject31WK12</b> | <b>Subject32WK0</b> | <b>Subject32WK12</b> |
|----------------|---------------|--------------|---------------------|----------------------|---------------------|----------------------|
| <b>seq576</b>  | Firmicutes    | Clostridia   | 0                   | 0                    | 0                   | 0                    |
| <b>seq915</b>  | Firmicutes    | Clostridia   | 0                   | 0                    | 0                   | 0                    |
| <b>seq46</b>   | Firmicutes    | Clostridia   | 0                   | 0                    | 0                   | 0                    |
| <b>seq409</b>  | Firmicutes    | Clostridia   | 0                   | 0                    | 0                   | 0                    |
| <b>seq629</b>  | Firmicutes    | Clostridia   | 0                   | 0                    | 0                   | 0                    |
| <b>seq691</b>  | Firmicutes    | Clostridia   | 0                   | 0                    | 0                   | 0                    |
| <b>seq838</b>  | Firmicutes    | Clostridia   | 0                   | 0                    | 0                   | 0                    |
| <b>seq862</b>  | Firmicutes    | Clostridia   | 0                   | 0                    | 0                   | 0                    |
| <b>seq1023</b> | Firmicutes    | Clostridia   | 0                   | 0                    | 0                   | 0                    |
| <b>seq1142</b> | Firmicutes    | Clostridia   | 0                   | 0                    | 0                   | 0                    |
| <b>seq1202</b> | Firmicutes    | Clostridia   | 0                   | 0                    | 0                   | 0                    |
| <b>seq1568</b> | Firmicutes    | Clostridia   | 0                   | 0                    | 0                   | 0                    |
| <b>seq17</b>   | Firmicutes    | Clostridia   | 0                   | 0                    | 0                   | 0                    |
| <b>seq80</b>   | Firmicutes    | Clostridia   | 0                   | 0                    | 0                   | 0                    |
| <b>seq509</b>  | Firmicutes    | Clostridia   | 0                   | 0                    | 0                   | 0                    |
| <b>seq623</b>  | Firmicutes    | Clostridia   | 0                   | 0                    | 0                   | 0                    |
| <b>seq863</b>  | Firmicutes    | Clostridia   | 0                   | 0                    | 0                   | 0                    |
| <b>seq1116</b> | Firmicutes    | Clostridia   | 0                   | 0                    | 0                   | 0                    |
| <b>seq1140</b> | Firmicutes    | Clostridia   | 0                   | 0                    | 0                   | 0                    |
| <b>seq1175</b> | Firmicutes    | Clostridia   | 0                   | 0                    | 0                   | 0                    |
| <b>seq1208</b> | Firmicutes    | Clostridia   | 0                   | 0                    | 0                   | 0                    |
| <b>seq321</b>  | Firmicutes    | Clostridia   | 0                   | 0                    | 0                   | 0                    |
| <b>seq420</b>  | Firmicutes    | Clostridia   | 0                   | 0                    | 0                   | 0                    |
| <b>seq1812</b> | Firmicutes    | Clostridia   | 0                   | 0                    | 0                   | 0                    |
| <b>seq8</b>    | Firmicutes    | Clostridia   | 0                   | 0                    | 3199                | 43                   |
| <b>seq191</b>  | Firmicutes    | Clostridia   | 0                   | 0                    | 0                   | 0                    |
| <b>seq500</b>  | Firmicutes    | Clostridia   | 0                   | 0                    | 0                   | 0                    |
| <b>seq570</b>  | Firmicutes    | Clostridia   | 0                   | 0                    | 96                  | 0                    |
| <b>seq965</b>  | Firmicutes    | Clostridia   | 0                   | 0                    | 0                   | 0                    |
| <b>seq1033</b> | Firmicutes    | Clostridia   | 0                   | 0                    | 130                 | 0                    |
| <b>seq1168</b> | Firmicutes    | Clostridia   | 0                   | 0                    | 0                   | 0                    |
| <b>seq1184</b> | Firmicutes    | Clostridia   | 0                   | 0                    | 0                   | 0                    |

Sequence Count Table

|                | <b>Phylum</b> | <b>Class</b> | <b>Subject13WK0</b> | <b>Subject13WK12</b> | <b>Subject39WK0</b> | <b>Subject39WK12</b> |
|----------------|---------------|--------------|---------------------|----------------------|---------------------|----------------------|
| <b>seq576</b>  | Firmicutes    | Clostridia   | 0                   | 0                    | 0                   | 0                    |
| <b>seq915</b>  | Firmicutes    | Clostridia   | 0                   | 0                    | 0                   | 0                    |
| <b>seq46</b>   | Firmicutes    | Clostridia   | 0                   | 0                    | 0                   | 1330                 |
| <b>seq409</b>  | Firmicutes    | Clostridia   | 0                   | 0                    | 0                   | 0                    |
| <b>seq629</b>  | Firmicutes    | Clostridia   | 0                   | 0                    | 0                   | 0                    |
| <b>seq691</b>  | Firmicutes    | Clostridia   | 0                   | 0                    | 0                   | 0                    |
| <b>seq838</b>  | Firmicutes    | Clostridia   | 0                   | 0                    | 0                   | 0                    |
| <b>seq862</b>  | Firmicutes    | Clostridia   | 0                   | 0                    | 0                   | 0                    |
| <b>seq1023</b> | Firmicutes    | Clostridia   | 0                   | 0                    | 0                   | 0                    |
| <b>seq1142</b> | Firmicutes    | Clostridia   | 0                   | 0                    | 0                   | 0                    |
| <b>seq1202</b> | Firmicutes    | Clostridia   | 0                   | 0                    | 0                   | 0                    |
| <b>seq1568</b> | Firmicutes    | Clostridia   | 0                   | 0                    | 0                   | 0                    |
| <b>seq17</b>   | Firmicutes    | Clostridia   | 1470                | 439                  | 0                   | 1221                 |
| <b>seq80</b>   | Firmicutes    | Clostridia   | 298                 | 122                  | 0                   | 415                  |
| <b>seq509</b>  | Firmicutes    | Clostridia   | 0                   | 0                    | 0                   | 0                    |
| <b>seq623</b>  | Firmicutes    | Clostridia   | 0                   | 0                    | 0                   | 0                    |
| <b>seq863</b>  | Firmicutes    | Clostridia   | 0                   | 0                    | 0                   | 0                    |
| <b>seq1116</b> | Firmicutes    | Clostridia   | 0                   | 0                    | 0                   | 0                    |
| <b>seq1140</b> | Firmicutes    | Clostridia   | 0                   | 0                    | 0                   | 0                    |
| <b>seq1175</b> | Firmicutes    | Clostridia   | 0                   | 0                    | 0                   | 0                    |
| <b>seq1208</b> | Firmicutes    | Clostridia   | 0                   | 0                    | 0                   | 0                    |
| <b>seq321</b>  | Firmicutes    | Clostridia   | 0                   | 14                   | 0                   | 0                    |
| <b>seq420</b>  | Firmicutes    | Clostridia   | 0                   | 0                    | 0                   | 0                    |
| <b>seq1812</b> | Firmicutes    | Clostridia   | 0                   | 0                    | 0                   | 0                    |
| <b>seq8</b>    | Firmicutes    | Clostridia   | 4511                | 2287                 | 0                   | 1270                 |
| <b>seq191</b>  | Firmicutes    | Clostridia   | 0                   | 0                    | 0                   | 0                    |
| <b>seq500</b>  | Firmicutes    | Clostridia   | 0                   | 0                    | 0                   | 0                    |
| <b>seq570</b>  | Firmicutes    | Clostridia   | 0                   | 0                    | 0                   | 0                    |
| <b>seq965</b>  | Firmicutes    | Clostridia   | 0                   | 0                    | 0                   | 0                    |
| <b>seq1033</b> | Firmicutes    | Clostridia   | 0                   | 0                    | 0                   | 0                    |
| <b>seq1168</b> | Firmicutes    | Clostridia   | 0                   | 0                    | 0                   | 0                    |
| <b>seq1184</b> | Firmicutes    | Clostridia   | 0                   | 0                    | 0                   | 0                    |

Sequence Count Table

|                | <b>Phylum</b> | <b>Class</b> | <b>Subject26WK0</b> | <b>Subject26WK12</b> | <b>Subject14WK0</b> | <b>Subject14WK12</b> |
|----------------|---------------|--------------|---------------------|----------------------|---------------------|----------------------|
| <b>seq576</b>  | Firmicutes    | Clostridia   | 0                   | 0                    | 0                   | 0                    |
| <b>seq915</b>  | Firmicutes    | Clostridia   | 0                   | 0                    | 0                   | 0                    |
| <b>seq46</b>   | Firmicutes    | Clostridia   | 242                 | 1120                 | 963                 | 538                  |
| <b>seq409</b>  | Firmicutes    | Clostridia   | 0                   | 0                    | 0                   | 0                    |
| <b>seq629</b>  | Firmicutes    | Clostridia   | 0                   | 0                    | 0                   | 0                    |
| <b>seq691</b>  | Firmicutes    | Clostridia   | 60                  | 333                  | 0                   | 0                    |
| <b>seq838</b>  | Firmicutes    | Clostridia   | 0                   | 0                    | 0                   | 0                    |
| <b>seq862</b>  | Firmicutes    | Clostridia   | 0                   | 0                    | 0                   | 0                    |
| <b>seq1023</b> | Firmicutes    | Clostridia   | 0                   | 0                    | 0                   | 0                    |
| <b>seq1142</b> | Firmicutes    | Clostridia   | 0                   | 0                    | 0                   | 0                    |
| <b>seq1202</b> | Firmicutes    | Clostridia   | 0                   | 0                    | 0                   | 0                    |
| <b>seq1568</b> | Firmicutes    | Clostridia   | 0                   | 0                    | 0                   | 0                    |
| <b>seq17</b>   | Firmicutes    | Clostridia   | 961                 | 3376                 | 1294                | 966                  |
| <b>seq80</b>   | Firmicutes    | Clostridia   | 0                   | 0                    | 287                 | 331                  |
| <b>seq509</b>  | Firmicutes    | Clostridia   | 0                   | 0                    | 0                   | 0                    |
| <b>seq623</b>  | Firmicutes    | Clostridia   | 0                   | 0                    | 0                   | 0                    |
| <b>seq863</b>  | Firmicutes    | Clostridia   | 0                   | 0                    | 0                   | 0                    |
| <b>seq1116</b> | Firmicutes    | Clostridia   | 0                   | 0                    | 0                   | 0                    |
| <b>seq1140</b> | Firmicutes    | Clostridia   | 0                   | 0                    | 0                   | 0                    |
| <b>seq1175</b> | Firmicutes    | Clostridia   | 0                   | 0                    | 0                   | 0                    |
| <b>seq1208</b> | Firmicutes    | Clostridia   | 0                   | 0                    | 0                   | 0                    |
| <b>seq321</b>  | Firmicutes    | Clostridia   | 472                 | 469                  | 0                   | 0                    |
| <b>seq420</b>  | Firmicutes    | Clostridia   | 230                 | 671                  | 0                   | 9                    |
| <b>seq1812</b> | Firmicutes    | Clostridia   | 0                   | 0                    | 0                   | 0                    |
| <b>seq8</b>    | Firmicutes    | Clostridia   | 3004                | 2742                 | 3011                | 2092                 |
| <b>seq191</b>  | Firmicutes    | Clostridia   | 0                   | 0                    | 0                   | 0                    |
| <b>seq500</b>  | Firmicutes    | Clostridia   | 0                   | 0                    | 0                   | 0                    |
| <b>seq570</b>  | Firmicutes    | Clostridia   | 0                   | 0                    | 0                   | 0                    |
| <b>seq965</b>  | Firmicutes    | Clostridia   | 0                   | 0                    | 0                   | 0                    |
| <b>seq1033</b> | Firmicutes    | Clostridia   | 0                   | 0                    | 0                   | 0                    |
| <b>seq1168</b> | Firmicutes    | Clostridia   | 0                   | 0                    | 0                   | 0                    |
| <b>seq1184</b> | Firmicutes    | Clostridia   | 0                   | 0                    | 0                   | 0                    |

Sequence Count Table

|                | <b>Phylum</b> | <b>Class</b> | <b>Subject27WK0</b> | <b>Subject27WK12</b> | <b>Subject15WK0</b> | <b>Subject15WK12</b> |
|----------------|---------------|--------------|---------------------|----------------------|---------------------|----------------------|
| <b>seq576</b>  | Firmicutes    | Clostridia   | 0                   | 0                    | 0                   | 0                    |
| <b>seq915</b>  | Firmicutes    | Clostridia   | 0                   | 0                    | 0                   | 0                    |
| <b>seq46</b>   | Firmicutes    | Clostridia   | 1161                | 794                  | 0                   | 0                    |
| <b>seq409</b>  | Firmicutes    | Clostridia   | 0                   | 0                    | 0                   | 0                    |
| <b>seq629</b>  | Firmicutes    | Clostridia   | 0                   | 0                    | 0                   | 0                    |
| <b>seq691</b>  | Firmicutes    | Clostridia   | 0                   | 0                    | 0                   | 0                    |
| <b>seq838</b>  | Firmicutes    | Clostridia   | 0                   | 0                    | 0                   | 0                    |
| <b>seq862</b>  | Firmicutes    | Clostridia   | 0                   | 0                    | 0                   | 0                    |
| <b>seq1023</b> | Firmicutes    | Clostridia   | 0                   | 0                    | 0                   | 0                    |
| <b>seq1142</b> | Firmicutes    | Clostridia   | 0                   | 0                    | 0                   | 0                    |
| <b>seq1202</b> | Firmicutes    | Clostridia   | 0                   | 0                    | 0                   | 0                    |
| <b>seq1568</b> | Firmicutes    | Clostridia   | 0                   | 0                    | 0                   | 0                    |
| <b>seq17</b>   | Firmicutes    | Clostridia   | 1945                | 945                  | 810                 | 510                  |
| <b>seq80</b>   | Firmicutes    | Clostridia   | 429                 | 236                  | 763                 | 873                  |
| <b>seq509</b>  | Firmicutes    | Clostridia   | 0                   | 0                    | 0                   | 0                    |
| <b>seq623</b>  | Firmicutes    | Clostridia   | 0                   | 0                    | 0                   | 0                    |
| <b>seq863</b>  | Firmicutes    | Clostridia   | 0                   | 0                    | 0                   | 0                    |
| <b>seq1116</b> | Firmicutes    | Clostridia   | 0                   | 0                    | 0                   | 0                    |
| <b>seq1140</b> | Firmicutes    | Clostridia   | 0                   | 0                    | 0                   | 0                    |
| <b>seq1175</b> | Firmicutes    | Clostridia   | 0                   | 0                    | 0                   | 0                    |
| <b>seq1208</b> | Firmicutes    | Clostridia   | 0                   | 0                    | 78                  | 0                    |
| <b>seq321</b>  | Firmicutes    | Clostridia   | 0                   | 0                    | 0                   | 0                    |
| <b>seq420</b>  | Firmicutes    | Clostridia   | 0                   | 0                    | 0                   | 0                    |
| <b>seq1812</b> | Firmicutes    | Clostridia   | 0                   | 0                    | 0                   | 0                    |
| <b>seq8</b>    | Firmicutes    | Clostridia   | 1541                | 1317                 | 1979                | 1048                 |
| <b>seq191</b>  | Firmicutes    | Clostridia   | 125                 | 0                    | 0                   | 0                    |
| <b>seq500</b>  | Firmicutes    | Clostridia   | 0                   | 0                    | 0                   | 0                    |
| <b>seq570</b>  | Firmicutes    | Clostridia   | 171                 | 211                  | 0                   | 0                    |
| <b>seq965</b>  | Firmicutes    | Clostridia   | 0                   | 0                    | 0                   | 0                    |
| <b>seq1033</b> | Firmicutes    | Clostridia   | 0                   | 0                    | 0                   | 0                    |
| <b>seq1168</b> | Firmicutes    | Clostridia   | 0                   | 0                    | 0                   | 0                    |
| <b>seq1184</b> | Firmicutes    | Clostridia   | 0                   | 0                    | 0                   | 0                    |

Sequence Count Table

|                | <b>Phylum</b> | <b>Class</b> | <b>Δ</b> |  |  |  |
|----------------|---------------|--------------|----------|--|--|--|
| <b>seq576</b>  | Firmicutes    | Clostridia   |          |  |  |  |
| <b>seq915</b>  | Firmicutes    | Clostridia   |          |  |  |  |
| <b>seq46</b>   | Firmicutes    | Clostridia   |          |  |  |  |
| <b>seq409</b>  | Firmicutes    | Clostridia   |          |  |  |  |
| <b>seq629</b>  | Firmicutes    | Clostridia   |          |  |  |  |
| <b>seq691</b>  | Firmicutes    | Clostridia   |          |  |  |  |
| <b>seq838</b>  | Firmicutes    | Clostridia   |          |  |  |  |
| <b>seq862</b>  | Firmicutes    | Clostridia   |          |  |  |  |
| <b>seq1023</b> | Firmicutes    | Clostridia   |          |  |  |  |
| <b>seq1142</b> | Firmicutes    | Clostridia   |          |  |  |  |
| <b>seq1202</b> | Firmicutes    | Clostridia   |          |  |  |  |
| <b>seq1568</b> | Firmicutes    | Clostridia   |          |  |  |  |
| <b>seq17</b>   | Firmicutes    | Clostridia   |          |  |  |  |
| <b>seq80</b>   | Firmicutes    | Clostridia   |          |  |  |  |
| <b>seq509</b>  | Firmicutes    | Clostridia   |          |  |  |  |
| <b>seq623</b>  | Firmicutes    | Clostridia   |          |  |  |  |
| <b>seq863</b>  | Firmicutes    | Clostridia   |          |  |  |  |
| <b>seq1116</b> | Firmicutes    | Clostridia   |          |  |  |  |
| <b>seq1140</b> | Firmicutes    | Clostridia   |          |  |  |  |
| <b>seq1175</b> | Firmicutes    | Clostridia   |          |  |  |  |
| <b>seq1208</b> | Firmicutes    | Clostridia   |          |  |  |  |
| <b>seq321</b>  | Firmicutes    | Clostridia   |          |  |  |  |
| <b>seq420</b>  | Firmicutes    | Clostridia   |          |  |  |  |
| <b>seq1812</b> | Firmicutes    | Clostridia   |          |  |  |  |
| <b>seq8</b>    | Firmicutes    | Clostridia   |          |  |  |  |
| <b>seq191</b>  | Firmicutes    | Clostridia   |          |  |  |  |
| <b>seq500</b>  | Firmicutes    | Clostridia   |          |  |  |  |
| <b>seq570</b>  | Firmicutes    | Clostridia   |          |  |  |  |
| <b>seq965</b>  | Firmicutes    | Clostridia   |          |  |  |  |
| <b>seq1033</b> | Firmicutes    | Clostridia   |          |  |  |  |
| <b>seq1168</b> | Firmicutes    | Clostridia   |          |  |  |  |
| <b>seq1184</b> | Firmicutes    | Clostridia   |          |  |  |  |

Sequence Count Table

|                | <b>Phylum</b> | <b>Class</b> | <b>Order</b>  | <b>Family</b>   |
|----------------|---------------|--------------|---------------|-----------------|
| <b>seq1189</b> | Firmicutes    | Clostridia   | Clostridiales | Lachnospiraceae |
| <b>seq344</b>  | Firmicutes    | Clostridia   | Clostridiales | Lachnospiraceae |
| <b>seq810</b>  | Firmicutes    | Clostridia   | Clostridiales | Lachnospiraceae |
| <b>seq954</b>  | Firmicutes    | Clostridia   | Clostridiales | Lachnospiraceae |
| <b>seq1194</b> | Firmicutes    | Clostridia   | Clostridiales | Lachnospiraceae |
| <b>seq1739</b> | Firmicutes    | Clostridia   | Clostridiales | Lachnospiraceae |
| <b>seq1343</b> | Firmicutes    | Clostridia   | Clostridiales | Lachnospiraceae |
| <b>seq1492</b> | Firmicutes    | Clostridia   | Clostridiales | Lachnospiraceae |
| <b>seq452</b>  | Firmicutes    | Clostridia   | Clostridiales | Lachnospiraceae |
| <b>seq1348</b> | Firmicutes    | Clostridia   | Clostridiales | Lachnospiraceae |
| <b>seq520</b>  | Firmicutes    | Clostridia   | Clostridiales | Lachnospiraceae |
| <b>seq613</b>  | Firmicutes    | Clostridia   | Clostridiales | Lachnospiraceae |
| <b>seq1283</b> | Firmicutes    | Clostridia   | Clostridiales | Lachnospiraceae |
| <b>seq1886</b> | Firmicutes    | Clostridia   | Clostridiales | Lachnospiraceae |
| <b>seq66</b>   | Firmicutes    | Clostridia   | Clostridiales | Lachnospiraceae |
| <b>seq81</b>   | Firmicutes    | Clostridia   | Clostridiales | Lachnospiraceae |
| <b>seq139</b>  | Firmicutes    | Clostridia   | Clostridiales | Lachnospiraceae |
| <b>seq141</b>  | Firmicutes    | Clostridia   | Clostridiales | Lachnospiraceae |
| <b>seq162</b>  | Firmicutes    | Clostridia   | Clostridiales | Lachnospiraceae |
| <b>seq209</b>  | Firmicutes    | Clostridia   | Clostridiales | Lachnospiraceae |
| <b>seq274</b>  | Firmicutes    | Clostridia   | Clostridiales | Lachnospiraceae |
| <b>seq277</b>  | Firmicutes    | Clostridia   | Clostridiales | Lachnospiraceae |
| <b>seq343</b>  | Firmicutes    | Clostridia   | Clostridiales | Lachnospiraceae |
| <b>seq352</b>  | Firmicutes    | Clostridia   | Clostridiales | Lachnospiraceae |
| <b>seq445</b>  | Firmicutes    | Clostridia   | Clostridiales | Lachnospiraceae |
| <b>seq464</b>  | Firmicutes    | Clostridia   | Clostridiales | Lachnospiraceae |
| <b>seq528</b>  | Firmicutes    | Clostridia   | Clostridiales | Lachnospiraceae |
| <b>seq606</b>  | Firmicutes    | Clostridia   | Clostridiales | Lachnospiraceae |
| <b>seq626</b>  | Firmicutes    | Clostridia   | Clostridiales | Lachnospiraceae |
| <b>seq712</b>  | Firmicutes    | Clostridia   | Clostridiales | Lachnospiraceae |
| <b>seq774</b>  | Firmicutes    | Clostridia   | Clostridiales | Lachnospiraceae |
| <b>seq801</b>  | Firmicutes    | Clostridia   | Clostridiales | Lachnospiraceae |

Sequence Count Table

|                | <b>Phylum</b> | <b>Class</b> | <b>Genus</b>        | <b>Species</b> |
|----------------|---------------|--------------|---------------------|----------------|
| <b>seq1189</b> | Firmicutes    | Clostridia   | Fusicatenibacter    |                |
| <b>seq344</b>  | Firmicutes    | Clostridia   | GCA-900066575       |                |
| <b>seq810</b>  | Firmicutes    | Clostridia   | GCA-900066575       |                |
| <b>seq954</b>  | Firmicutes    | Clostridia   | GCA-900066575       |                |
| <b>seq1194</b> | Firmicutes    | Clostridia   | GCA-900066575       |                |
| <b>seq1739</b> | Firmicutes    | Clostridia   | GCA-900066575       |                |
| <b>seq1343</b> | Firmicutes    | Clostridia   | GCA-900066755       |                |
| <b>seq1492</b> | Firmicutes    | Clostridia   | GCA-900066755       |                |
| <b>seq452</b>  | Firmicutes    | Clostridia   | Howardella          | ureilytica     |
| <b>seq1348</b> | Firmicutes    | Clostridia   | Howardella          |                |
| <b>seq520</b>  | Firmicutes    | Clostridia   | Hungatella          | hathewayi      |
| <b>seq613</b>  | Firmicutes    | Clostridia   | Hungatella          |                |
| <b>seq1283</b> | Firmicutes    | Clostridia   | Hungatella          |                |
| <b>seq1886</b> | Firmicutes    | Clostridia   | Lachnoanaerobaculum |                |
| <b>seq66</b>   | Firmicutes    | Clostridia   | Lachnoclostridium   |                |
| <b>seq81</b>   | Firmicutes    | Clostridia   | Lachnoclostridium   |                |
| <b>seq139</b>  | Firmicutes    | Clostridia   | Lachnoclostridium   |                |
| <b>seq141</b>  | Firmicutes    | Clostridia   | Lachnoclostridium   |                |
| <b>seq162</b>  | Firmicutes    | Clostridia   | Lachnoclostridium   |                |
| <b>seq209</b>  | Firmicutes    | Clostridia   | Lachnoclostridium   |                |
| <b>seq274</b>  | Firmicutes    | Clostridia   | Lachnoclostridium   |                |
| <b>seq277</b>  | Firmicutes    | Clostridia   | Lachnoclostridium   |                |
| <b>seq343</b>  | Firmicutes    | Clostridia   | Lachnoclostridium   |                |
| <b>seq352</b>  | Firmicutes    | Clostridia   | Lachnoclostridium   |                |
| <b>seq445</b>  | Firmicutes    | Clostridia   | Lachnoclostridium   |                |
| <b>seq464</b>  | Firmicutes    | Clostridia   | Lachnoclostridium   |                |
| <b>seq528</b>  | Firmicutes    | Clostridia   | Lachnoclostridium   |                |
| <b>seq606</b>  | Firmicutes    | Clostridia   | Lachnoclostridium   |                |
| <b>seq626</b>  | Firmicutes    | Clostridia   | Lachnoclostridium   |                |
| <b>seq712</b>  | Firmicutes    | Clostridia   | Lachnoclostridium   |                |
| <b>seq774</b>  | Firmicutes    | Clostridia   | Lachnoclostridium   |                |
| <b>seq801</b>  | Firmicutes    | Clostridia   | Lachnoclostridium   |                |

Sequence Count Table

|                | <b>Phylum</b> | <b>Class</b> | <b>Subject34WK0</b> | <b>Subject34WK12</b> | <b>Subject16WK0</b> | <b>Subject16WK12</b> |
|----------------|---------------|--------------|---------------------|----------------------|---------------------|----------------------|
| <b>seq1189</b> | Firmicutes    | Clostridia   | 0                   | 0                    | 0                   | 0                    |
| <b>seq344</b>  | Firmicutes    | Clostridia   | 0                   | 15                   | 50                  | 48                   |
| <b>seq810</b>  | Firmicutes    | Clostridia   | 0                   | 0                    | 0                   | 0                    |
| <b>seq954</b>  | Firmicutes    | Clostridia   | 0                   | 0                    | 0                   | 0                    |
| <b>seq1194</b> | Firmicutes    | Clostridia   | 0                   | 0                    | 0                   | 0                    |
| <b>seq1739</b> | Firmicutes    | Clostridia   | 0                   | 0                    | 0                   | 0                    |
| <b>seq1343</b> | Firmicutes    | Clostridia   | 0                   | 0                    | 0                   | 0                    |
| <b>seq1492</b> | Firmicutes    | Clostridia   | 0                   | 0                    | 0                   | 0                    |
| <b>seq452</b>  | Firmicutes    | Clostridia   | 0                   | 0                    | 0                   | 0                    |
| <b>seq1348</b> | Firmicutes    | Clostridia   | 0                   | 0                    | 0                   | 0                    |
| <b>seq520</b>  | Firmicutes    | Clostridia   | 0                   | 0                    | 0                   | 0                    |
| <b>seq613</b>  | Firmicutes    | Clostridia   | 0                   | 0                    | 0                   | 0                    |
| <b>seq1283</b> | Firmicutes    | Clostridia   | 0                   | 0                    | 0                   | 0                    |
| <b>seq1886</b> | Firmicutes    | Clostridia   | 0                   | 0                    | 0                   | 0                    |
| <b>seq66</b>   | Firmicutes    | Clostridia   | 20                  | 728                  | 1097                | 312                  |
| <b>seq81</b>   | Firmicutes    | Clostridia   | 0                   | 58                   | 208                 | 309                  |
| <b>seq139</b>  | Firmicutes    | Clostridia   | 8                   | 135                  | 0                   | 0                    |
| <b>seq141</b>  | Firmicutes    | Clostridia   | 0                   | 250                  | 95                  | 116                  |
| <b>seq162</b>  | Firmicutes    | Clostridia   | 0                   | 0                    | 27                  | 0                    |
| <b>seq209</b>  | Firmicutes    | Clostridia   | 0                   | 21                   | 0                   | 0                    |
| <b>seq274</b>  | Firmicutes    | Clostridia   | 0                   | 15                   | 0                   | 0                    |
| <b>seq277</b>  | Firmicutes    | Clostridia   | 0                   | 12                   | 9                   | 12                   |
| <b>seq343</b>  | Firmicutes    | Clostridia   | 0                   | 0                    | 0                   | 0                    |
| <b>seq352</b>  | Firmicutes    | Clostridia   | 0                   | 44                   | 0                   | 0                    |
| <b>seq445</b>  | Firmicutes    | Clostridia   | 0                   | 61                   | 0                   | 0                    |
| <b>seq464</b>  | Firmicutes    | Clostridia   | 0                   | 0                    | 0                   | 0                    |
| <b>seq528</b>  | Firmicutes    | Clostridia   | 0                   | 0                    | 0                   | 0                    |
| <b>seq606</b>  | Firmicutes    | Clostridia   | 0                   | 0                    | 0                   | 0                    |
| <b>seq626</b>  | Firmicutes    | Clostridia   | 0                   | 0                    | 0                   | 0                    |
| <b>seq712</b>  | Firmicutes    | Clostridia   | 0                   | 0                    | 0                   | 0                    |
| <b>seq774</b>  | Firmicutes    | Clostridia   | 0                   | 0                    | 0                   | 0                    |
| <b>seq801</b>  | Firmicutes    | Clostridia   | 0                   | 0                    | 0                   | 0                    |



Sequence Count Table

|                | <b>Phylum</b> | <b>Class</b> | <b>Subject17WK0</b> | <b>Subject17WK12</b> | <b>Subject1WK0</b> | <b>Subject1WK12</b> |
|----------------|---------------|--------------|---------------------|----------------------|--------------------|---------------------|
| <b>seq1189</b> | Firmicutes    | Clostridia   | 0                   | 0                    | 0                  | 0                   |
| <b>seq344</b>  | Firmicutes    | Clostridia   | 13                  | 48                   | 0                  | 0                   |
| <b>seq810</b>  | Firmicutes    | Clostridia   | 0                   | 0                    | 0                  | 0                   |
| <b>seq954</b>  | Firmicutes    | Clostridia   | 0                   | 0                    | 0                  | 0                   |
| <b>seq1194</b> | Firmicutes    | Clostridia   | 0                   | 0                    | 0                  | 21                  |
| <b>seq1739</b> | Firmicutes    | Clostridia   | 0                   | 0                    | 0                  | 0                   |
| <b>seq1343</b> | Firmicutes    | Clostridia   | 0                   | 0                    | 0                  | 6                   |
| <b>seq1492</b> | Firmicutes    | Clostridia   | 0                   | 0                    | 0                  | 0                   |
| <b>seq452</b>  | Firmicutes    | Clostridia   | 61                  | 64                   | 0                  | 0                   |
| <b>seq1348</b> | Firmicutes    | Clostridia   | 48                  | 0                    | 0                  | 0                   |
| <b>seq520</b>  | Firmicutes    | Clostridia   | 0                   | 0                    | 15                 | 17                  |
| <b>seq613</b>  | Firmicutes    | Clostridia   | 0                   | 0                    | 0                  | 0                   |
| <b>seq1283</b> | Firmicutes    | Clostridia   | 0                   | 0                    | 0                  | 0                   |
| <b>seq1886</b> | Firmicutes    | Clostridia   | 0                   | 0                    | 0                  | 0                   |
| <b>seq66</b>   | Firmicutes    | Clostridia   | 49                  | 49                   | 1690               | 1566                |
| <b>seq81</b>   | Firmicutes    | Clostridia   | 68                  | 86                   | 476                | 404                 |
| <b>seq139</b>  | Firmicutes    | Clostridia   | 10                  | 0                    | 130                | 115                 |
| <b>seq141</b>  | Firmicutes    | Clostridia   | 25                  | 18                   | 627                | 483                 |
| <b>seq162</b>  | Firmicutes    | Clostridia   | 0                   | 0                    | 0                  | 0                   |
| <b>seq209</b>  | Firmicutes    | Clostridia   | 0                   | 0                    | 0                  | 27                  |
| <b>seq274</b>  | Firmicutes    | Clostridia   | 0                   | 0                    | 0                  | 0                   |
| <b>seq277</b>  | Firmicutes    | Clostridia   | 6                   | 0                    | 0                  | 0                   |
| <b>seq343</b>  | Firmicutes    | Clostridia   | 98                  | 86                   | 0                  | 0                   |
| <b>seq352</b>  | Firmicutes    | Clostridia   | 0                   | 0                    | 11                 | 14                  |
| <b>seq445</b>  | Firmicutes    | Clostridia   | 0                   | 0                    | 0                  | 0                   |
| <b>seq464</b>  | Firmicutes    | Clostridia   | 0                   | 0                    | 0                  | 0                   |
| <b>seq528</b>  | Firmicutes    | Clostridia   | 0                   | 0                    | 0                  | 0                   |
| <b>seq606</b>  | Firmicutes    | Clostridia   | 0                   | 0                    | 0                  | 0                   |
| <b>seq626</b>  | Firmicutes    | Clostridia   | 0                   | 0                    | 0                  | 0                   |
| <b>seq712</b>  | Firmicutes    | Clostridia   | 0                   | 0                    | 0                  | 0                   |
| <b>seq774</b>  | Firmicutes    | Clostridia   | 0                   | 0                    | 0                  | 0                   |
| <b>seq801</b>  | Firmicutes    | Clostridia   | 0                   | 0                    | 0                  | 0                   |

Sequence Count Table

|                | <b>Phylum</b> | <b>Class</b> | <b>Subject2WK0</b> | <b>Subject2WK12</b> | <b>Subject3WK0</b> | <b>Subject3WK12</b> |
|----------------|---------------|--------------|--------------------|---------------------|--------------------|---------------------|
| <b>seq1189</b> | Firmicutes    | Clostridia   | 0                  | 0                   | 0                  | 0                   |
| <b>seq344</b>  | Firmicutes    | Clostridia   | 49                 | 58                  | 0                  | 0                   |
| <b>seq810</b>  | Firmicutes    | Clostridia   | 0                  | 0                   | 0                  | 0                   |
| <b>seq954</b>  | Firmicutes    | Clostridia   | 33                 | 31                  | 0                  | 0                   |
| <b>seq1194</b> | Firmicutes    | Clostridia   | 0                  | 0                   | 0                  | 0                   |
| <b>seq1739</b> | Firmicutes    | Clostridia   | 0                  | 0                   | 0                  | 0                   |
| <b>seq1343</b> | Firmicutes    | Clostridia   | 0                  | 0                   | 0                  | 0                   |
| <b>seq1492</b> | Firmicutes    | Clostridia   | 0                  | 0                   | 0                  | 0                   |
| <b>seq452</b>  | Firmicutes    | Clostridia   | 0                  | 0                   | 0                  | 0                   |
| <b>seq1348</b> | Firmicutes    | Clostridia   | 0                  | 0                   | 0                  | 0                   |
| <b>seq520</b>  | Firmicutes    | Clostridia   | 0                  | 120                 | 42                 | 0                   |
| <b>seq613</b>  | Firmicutes    | Clostridia   | 0                  | 51                  | 0                  | 0                   |
| <b>seq1283</b> | Firmicutes    | Clostridia   | 0                  | 0                   | 0                  | 0                   |
| <b>seq1886</b> | Firmicutes    | Clostridia   | 0                  | 0                   | 0                  | 0                   |
| <b>seq66</b>   | Firmicutes    | Clostridia   | 390                | 703                 | 0                  | 0                   |
| <b>seq81</b>   | Firmicutes    | Clostridia   | 406                | 482                 | 0                  | 0                   |
| <b>seq139</b>  | Firmicutes    | Clostridia   | 59                 | 317                 | 86                 | 236                 |
| <b>seq141</b>  | Firmicutes    | Clostridia   | 86                 | 91                  | 0                  | 0                   |
| <b>seq162</b>  | Firmicutes    | Clostridia   | 0                  | 0                   | 0                  | 0                   |
| <b>seq209</b>  | Firmicutes    | Clostridia   | 0                  | 0                   | 0                  | 0                   |
| <b>seq274</b>  | Firmicutes    | Clostridia   | 14                 | 20                  | 0                  | 0                   |
| <b>seq277</b>  | Firmicutes    | Clostridia   | 0                  | 0                   | 0                  | 0                   |
| <b>seq343</b>  | Firmicutes    | Clostridia   | 0                  | 0                   | 0                  | 0                   |
| <b>seq352</b>  | Firmicutes    | Clostridia   | 61                 | 185                 | 79                 | 144                 |
| <b>seq445</b>  | Firmicutes    | Clostridia   | 0                  | 0                   | 0                  | 0                   |
| <b>seq464</b>  | Firmicutes    | Clostridia   | 0                  | 0                   | 0                  | 0                   |
| <b>seq528</b>  | Firmicutes    | Clostridia   | 0                  | 0                   | 0                  | 0                   |
| <b>seq606</b>  | Firmicutes    | Clostridia   | 0                  | 0                   | 0                  | 0                   |
| <b>seq626</b>  | Firmicutes    | Clostridia   | 0                  | 0                   | 0                  | 0                   |
| <b>seq712</b>  | Firmicutes    | Clostridia   | 0                  | 0                   | 0                  | 0                   |
| <b>seq774</b>  | Firmicutes    | Clostridia   | 0                  | 0                   | 174                | 38                  |
| <b>seq801</b>  | Firmicutes    | Clostridia   | 0                  | 0                   | 0                  | 0                   |

Sequence Count Table

|                | <b>Phylum</b> | <b>Class</b> | <b>Subject4WK0</b> | <b>Subject4WK12</b> | <b>Subject5WK0</b> | <b>Subject5WK12</b> |
|----------------|---------------|--------------|--------------------|---------------------|--------------------|---------------------|
| <b>seq1189</b> | Firmicutes    | Clostridia   | 0                  | 0                   | 0                  | 0                   |
| <b>seq344</b>  | Firmicutes    | Clostridia   | 56                 | 43                  | 31                 | 51                  |
| <b>seq810</b>  | Firmicutes    | Clostridia   | 0                  | 19                  | 0                  | 0                   |
| <b>seq954</b>  | Firmicutes    | Clostridia   | 0                  | 0                   | 0                  | 0                   |
| <b>seq1194</b> | Firmicutes    | Clostridia   | 0                  | 0                   | 0                  | 0                   |
| <b>seq1739</b> | Firmicutes    | Clostridia   | 0                  | 0                   | 0                  | 0                   |
| <b>seq1343</b> | Firmicutes    | Clostridia   | 0                  | 8                   | 0                  | 0                   |
| <b>seq1492</b> | Firmicutes    | Clostridia   | 0                  | 0                   | 0                  | 25                  |
| <b>seq452</b>  | Firmicutes    | Clostridia   | 0                  | 0                   | 0                  | 0                   |
| <b>seq1348</b> | Firmicutes    | Clostridia   | 0                  | 0                   | 0                  | 0                   |
| <b>seq520</b>  | Firmicutes    | Clostridia   | 0                  | 25                  | 13                 | 32                  |
| <b>seq613</b>  | Firmicutes    | Clostridia   | 0                  | 0                   | 0                  | 0                   |
| <b>seq1283</b> | Firmicutes    | Clostridia   | 0                  | 0                   | 0                  | 0                   |
| <b>seq1886</b> | Firmicutes    | Clostridia   | 0                  | 0                   | 0                  | 0                   |
| <b>seq66</b>   | Firmicutes    | Clostridia   | 97                 | 800                 | 226                | 80                  |
| <b>seq81</b>   | Firmicutes    | Clostridia   | 62                 | 1431                | 823                | 105                 |
| <b>seq139</b>  | Firmicutes    | Clostridia   | 14                 | 78                  | 36                 | 122                 |
| <b>seq141</b>  | Firmicutes    | Clostridia   | 58                 | 142                 | 56                 | 0                   |
| <b>seq162</b>  | Firmicutes    | Clostridia   | 0                  | 86                  | 33                 | 21                  |
| <b>seq209</b>  | Firmicutes    | Clostridia   | 27                 | 65                  | 0                  | 108                 |
| <b>seq274</b>  | Firmicutes    | Clostridia   | 0                  | 0                   | 131                | 174                 |
| <b>seq277</b>  | Firmicutes    | Clostridia   | 0                  | 109                 | 0                  | 0                   |
| <b>seq343</b>  | Firmicutes    | Clostridia   | 0                  | 0                   | 369                | 430                 |
| <b>seq352</b>  | Firmicutes    | Clostridia   | 0                  | 0                   | 36                 | 116                 |
| <b>seq445</b>  | Firmicutes    | Clostridia   | 0                  | 0                   | 0                  | 0                   |
| <b>seq464</b>  | Firmicutes    | Clostridia   | 0                  | 252                 | 0                  | 0                   |
| <b>seq528</b>  | Firmicutes    | Clostridia   | 0                  | 0                   | 0                  | 0                   |
| <b>seq606</b>  | Firmicutes    | Clostridia   | 0                  | 0                   | 0                  | 0                   |
| <b>seq626</b>  | Firmicutes    | Clostridia   | 0                  | 182                 | 0                  | 0                   |
| <b>seq712</b>  | Firmicutes    | Clostridia   | 0                  | 0                   | 0                  | 0                   |
| <b>seq774</b>  | Firmicutes    | Clostridia   | 0                  | 0                   | 0                  | 0                   |
| <b>seq801</b>  | Firmicutes    | Clostridia   | 0                  | 0                   | 0                  | 0                   |

Sequence Count Table

|                | <b>Phylum</b> | <b>Class</b> | <b>Subject6WK0</b> | <b>Subject6WK12</b> | <b>Subject18WK0</b> | <b>Subject18WK12</b> |
|----------------|---------------|--------------|--------------------|---------------------|---------------------|----------------------|
| <b>seq1189</b> | Firmicutes    | Clostridia   | 0                  | 0                   | 0                   | 0                    |
| <b>seq344</b>  | Firmicutes    | Clostridia   | 47                 | 48                  | 0                   | 0                    |
| <b>seq810</b>  | Firmicutes    | Clostridia   | 0                  | 0                   | 0                   | 0                    |
| <b>seq954</b>  | Firmicutes    | Clostridia   | 0                  | 0                   | 0                   | 0                    |
| <b>seq1194</b> | Firmicutes    | Clostridia   | 0                  | 0                   | 0                   | 0                    |
| <b>seq1739</b> | Firmicutes    | Clostridia   | 0                  | 0                   | 0                   | 0                    |
| <b>seq1343</b> | Firmicutes    | Clostridia   | 0                  | 0                   | 16                  | 0                    |
| <b>seq1492</b> | Firmicutes    | Clostridia   | 0                  | 0                   | 0                   | 0                    |
| <b>seq452</b>  | Firmicutes    | Clostridia   | 112                | 124                 | 0                   | 0                    |
| <b>seq1348</b> | Firmicutes    | Clostridia   | 0                  | 0                   | 0                   | 0                    |
| <b>seq520</b>  | Firmicutes    | Clostridia   | 0                  | 0                   | 0                   | 0                    |
| <b>seq613</b>  | Firmicutes    | Clostridia   | 0                  | 0                   | 0                   | 0                    |
| <b>seq1283</b> | Firmicutes    | Clostridia   | 0                  | 0                   | 0                   | 0                    |
| <b>seq1886</b> | Firmicutes    | Clostridia   | 0                  | 0                   | 0                   | 0                    |
| <b>seq66</b>   | Firmicutes    | Clostridia   | 236                | 384                 | 448                 | 108                  |
| <b>seq81</b>   | Firmicutes    | Clostridia   | 209                | 635                 | 590                 | 0                    |
| <b>seq139</b>  | Firmicutes    | Clostridia   | 0                  | 0                   | 63                  | 54                   |
| <b>seq141</b>  | Firmicutes    | Clostridia   | 67                 | 90                  | 0                   | 0                    |
| <b>seq162</b>  | Firmicutes    | Clostridia   | 0                  | 0                   | 156                 | 134                  |
| <b>seq209</b>  | Firmicutes    | Clostridia   | 0                  | 0                   | 0                   | 0                    |
| <b>seq274</b>  | Firmicutes    | Clostridia   | 0                  | 0                   | 0                   | 0                    |
| <b>seq277</b>  | Firmicutes    | Clostridia   | 0                  | 0                   | 158                 | 78                   |
| <b>seq343</b>  | Firmicutes    | Clostridia   | 0                  | 0                   | 0                   | 0                    |
| <b>seq352</b>  | Firmicutes    | Clostridia   | 0                  | 0                   | 10                  | 0                    |
| <b>seq445</b>  | Firmicutes    | Clostridia   | 0                  | 0                   | 0                   | 0                    |
| <b>seq464</b>  | Firmicutes    | Clostridia   | 0                  | 0                   | 0                   | 0                    |
| <b>seq528</b>  | Firmicutes    | Clostridia   | 0                  | 0                   | 0                   | 0                    |
| <b>seq606</b>  | Firmicutes    | Clostridia   | 0                  | 0                   | 0                   | 0                    |
| <b>seq626</b>  | Firmicutes    | Clostridia   | 0                  | 0                   | 0                   | 0                    |
| <b>seq712</b>  | Firmicutes    | Clostridia   | 0                  | 0                   | 0                   | 0                    |
| <b>seq774</b>  | Firmicutes    | Clostridia   | 0                  | 0                   | 43                  | 22                   |
| <b>seq801</b>  | Firmicutes    | Clostridia   | 0                  | 0                   | 0                   | 0                    |

Sequence Count Table

|                | <b>Phylum</b> | <b>Class</b> | <b>Subject19WK0</b> | <b>Subject19WK12</b> | <b>Subject20WK0</b> | <b>Subject20WK12</b> |
|----------------|---------------|--------------|---------------------|----------------------|---------------------|----------------------|
| <b>seq1189</b> | Firmicutes    | Clostridia   | 0                   | 0                    | 0                   | 0                    |
| <b>seq344</b>  | Firmicutes    | Clostridia   | 0                   | 0                    | 53                  | 65                   |
| <b>seq810</b>  | Firmicutes    | Clostridia   | 0                   | 17                   | 0                   | 0                    |
| <b>seq954</b>  | Firmicutes    | Clostridia   | 0                   | 0                    | 0                   | 0                    |
| <b>seq1194</b> | Firmicutes    | Clostridia   | 0                   | 0                    | 0                   | 0                    |
| <b>seq1739</b> | Firmicutes    | Clostridia   | 0                   | 0                    | 0                   | 0                    |
| <b>seq1343</b> | Firmicutes    | Clostridia   | 6                   | 7                    | 0                   | 0                    |
| <b>seq1492</b> | Firmicutes    | Clostridia   | 0                   | 0                    | 0                   | 0                    |
| <b>seq452</b>  | Firmicutes    | Clostridia   | 0                   | 0                    | 79                  | 67                   |
| <b>seq1348</b> | Firmicutes    | Clostridia   | 0                   | 0                    | 0                   | 0                    |
| <b>seq520</b>  | Firmicutes    | Clostridia   | 0                   | 0                    | 0                   | 0                    |
| <b>seq613</b>  | Firmicutes    | Clostridia   | 38                  | 68                   | 0                   | 0                    |
| <b>seq1283</b> | Firmicutes    | Clostridia   | 0                   | 0                    | 0                   | 0                    |
| <b>seq1886</b> | Firmicutes    | Clostridia   | 0                   | 0                    | 0                   | 0                    |
| <b>seq66</b>   | Firmicutes    | Clostridia   | 655                 | 901                  | 132                 | 172                  |
| <b>seq81</b>   | Firmicutes    | Clostridia   | 0                   | 0                    | 64                  | 21                   |
| <b>seq139</b>  | Firmicutes    | Clostridia   | 203                 | 186                  | 18                  | 0                    |
| <b>seq141</b>  | Firmicutes    | Clostridia   | 586                 | 1201                 | 22                  | 46                   |
| <b>seq162</b>  | Firmicutes    | Clostridia   | 905                 | 567                  | 0                   | 0                    |
| <b>seq209</b>  | Firmicutes    | Clostridia   | 0                   | 0                    | 0                   | 0                    |
| <b>seq274</b>  | Firmicutes    | Clostridia   | 88                  | 133                  | 0                   | 0                    |
| <b>seq277</b>  | Firmicutes    | Clostridia   | 0                   | 0                    | 0                   | 0                    |
| <b>seq343</b>  | Firmicutes    | Clostridia   | 0                   | 0                    | 0                   | 0                    |
| <b>seq352</b>  | Firmicutes    | Clostridia   | 26                  | 33                   | 0                   | 0                    |
| <b>seq445</b>  | Firmicutes    | Clostridia   | 0                   | 0                    | 0                   | 0                    |
| <b>seq464</b>  | Firmicutes    | Clostridia   | 0                   | 0                    | 0                   | 0                    |
| <b>seq528</b>  | Firmicutes    | Clostridia   | 0                   | 0                    | 0                   | 0                    |
| <b>seq606</b>  | Firmicutes    | Clostridia   | 114                 | 180                  | 0                   | 0                    |
| <b>seq626</b>  | Firmicutes    | Clostridia   | 0                   | 0                    | 0                   | 0                    |
| <b>seq712</b>  | Firmicutes    | Clostridia   | 0                   | 0                    | 0                   | 0                    |
| <b>seq774</b>  | Firmicutes    | Clostridia   | 0                   | 0                    | 0                   | 0                    |
| <b>seq801</b>  | Firmicutes    | Clostridia   | 112                 | 158                  | 0                   | 0                    |

Sequence Count Table

|                | <b>Phylum</b> | <b>Class</b> | <b>Subject7WK0</b> | <b>Subject7WK12</b> | <b>Subject21WK0</b> | <b>Subject21WK12</b> |
|----------------|---------------|--------------|--------------------|---------------------|---------------------|----------------------|
| <b>seq1189</b> | Firmicutes    | Clostridia   | 0                  | 0                   | 0                   | 0                    |
| <b>seq344</b>  | Firmicutes    | Clostridia   | 79                 | 69                  | 0                   | 0                    |
| <b>seq810</b>  | Firmicutes    | Clostridia   | 0                  | 0                   | 0                   | 0                    |
| <b>seq954</b>  | Firmicutes    | Clostridia   | 0                  | 0                   | 0                   | 0                    |
| <b>seq1194</b> | Firmicutes    | Clostridia   | 0                  | 0                   | 0                   | 0                    |
| <b>seq1739</b> | Firmicutes    | Clostridia   | 0                  | 0                   | 0                   | 0                    |
| <b>seq1343</b> | Firmicutes    | Clostridia   | 0                  | 6                   | 0                   | 0                    |
| <b>seq1492</b> | Firmicutes    | Clostridia   | 0                  | 0                   | 0                   | 0                    |
| <b>seq452</b>  | Firmicutes    | Clostridia   | 0                  | 0                   | 0                   | 0                    |
| <b>seq1348</b> | Firmicutes    | Clostridia   | 0                  | 0                   | 0                   | 0                    |
| <b>seq520</b>  | Firmicutes    | Clostridia   | 0                  | 0                   | 0                   | 0                    |
| <b>seq613</b>  | Firmicutes    | Clostridia   | 0                  | 0                   | 58                  | 106                  |
| <b>seq1283</b> | Firmicutes    | Clostridia   | 0                  | 0                   | 0                   | 0                    |
| <b>seq1886</b> | Firmicutes    | Clostridia   | 0                  | 0                   | 0                   | 0                    |
| <b>seq66</b>   | Firmicutes    | Clostridia   | 0                  | 0                   | 0                   | 0                    |
| <b>seq81</b>   | Firmicutes    | Clostridia   | 674                | 919                 | 0                   | 0                    |
| <b>seq139</b>  | Firmicutes    | Clostridia   | 51                 | 75                  | 599                 | 582                  |
| <b>seq141</b>  | Firmicutes    | Clostridia   | 0                  | 0                   | 130                 | 37                   |
| <b>seq162</b>  | Firmicutes    | Clostridia   | 0                  | 114                 | 0                   | 0                    |
| <b>seq209</b>  | Firmicutes    | Clostridia   | 0                  | 0                   | 0                   | 0                    |
| <b>seq274</b>  | Firmicutes    | Clostridia   | 0                  | 0                   | 531                 | 634                  |
| <b>seq277</b>  | Firmicutes    | Clostridia   | 0                  | 0                   | 0                   | 0                    |
| <b>seq343</b>  | Firmicutes    | Clostridia   | 0                  | 0                   | 0                   | 0                    |
| <b>seq352</b>  | Firmicutes    | Clostridia   | 9                  | 11                  | 10                  | 11                   |
| <b>seq445</b>  | Firmicutes    | Clostridia   | 0                  | 0                   | 0                   | 0                    |
| <b>seq464</b>  | Firmicutes    | Clostridia   | 0                  | 0                   | 0                   | 0                    |
| <b>seq528</b>  | Firmicutes    | Clostridia   | 0                  | 0                   | 0                   | 0                    |
| <b>seq606</b>  | Firmicutes    | Clostridia   | 0                  | 0                   | 0                   | 0                    |
| <b>seq626</b>  | Firmicutes    | Clostridia   | 0                  | 0                   | 0                   | 0                    |
| <b>seq712</b>  | Firmicutes    | Clostridia   | 0                  | 0                   | 0                   | 0                    |
| <b>seq774</b>  | Firmicutes    | Clostridia   | 0                  | 0                   | 0                   | 0                    |
| <b>seq801</b>  | Firmicutes    | Clostridia   | 0                  | 0                   | 0                   | 0                    |

Sequence Count Table

|                | <b>Phylum</b> | <b>Class</b> | <b>Subject8WK0</b> | <b>Subject8WK12</b> | <b>Subject9WK0</b> | <b>Subject9WK12</b> |
|----------------|---------------|--------------|--------------------|---------------------|--------------------|---------------------|
| <b>seq1189</b> | Firmicutes    | Clostridia   | 0                  | 0                   | 0                  | 0                   |
| <b>seq344</b>  | Firmicutes    | Clostridia   | 57                 | 96                  | 29                 | 0                   |
| <b>seq810</b>  | Firmicutes    | Clostridia   | 17                 | 17                  | 0                  | 0                   |
| <b>seq954</b>  | Firmicutes    | Clostridia   | 0                  | 0                   | 0                  | 0                   |
| <b>seq1194</b> | Firmicutes    | Clostridia   | 0                  | 0                   | 0                  | 0                   |
| <b>seq1739</b> | Firmicutes    | Clostridia   | 0                  | 0                   | 0                  | 0                   |
| <b>seq1343</b> | Firmicutes    | Clostridia   | 0                  | 0                   | 0                  | 0                   |
| <b>seq1492</b> | Firmicutes    | Clostridia   | 0                  | 0                   | 0                  | 0                   |
| <b>seq452</b>  | Firmicutes    | Clostridia   | 0                  | 0                   | 0                  | 0                   |
| <b>seq1348</b> | Firmicutes    | Clostridia   | 0                  | 0                   | 0                  | 0                   |
| <b>seq520</b>  | Firmicutes    | Clostridia   | 0                  | 0                   | 0                  | 0                   |
| <b>seq613</b>  | Firmicutes    | Clostridia   | 0                  | 0                   | 0                  | 0                   |
| <b>seq1283</b> | Firmicutes    | Clostridia   | 0                  | 0                   | 0                  | 0                   |
| <b>seq1886</b> | Firmicutes    | Clostridia   | 0                  | 0                   | 0                  | 3                   |
| <b>seq66</b>   | Firmicutes    | Clostridia   | 653                | 1329                | 0                  | 0                   |
| <b>seq81</b>   | Firmicutes    | Clostridia   | 530                | 2609                | 0                  | 0                   |
| <b>seq139</b>  | Firmicutes    | Clostridia   | 0                  | 0                   | 110                | 262                 |
| <b>seq141</b>  | Firmicutes    | Clostridia   | 105                | 111                 | 22                 | 1886                |
| <b>seq162</b>  | Firmicutes    | Clostridia   | 0                  | 0                   | 0                  | 0                   |
| <b>seq209</b>  | Firmicutes    | Clostridia   | 0                  | 0                   | 0                  | 27                  |
| <b>seq274</b>  | Firmicutes    | Clostridia   | 12                 | 0                   | 51                 | 0                   |
| <b>seq277</b>  | Firmicutes    | Clostridia   | 0                  | 0                   | 0                  | 0                   |
| <b>seq343</b>  | Firmicutes    | Clostridia   | 0                  | 0                   | 24                 | 0                   |
| <b>seq352</b>  | Firmicutes    | Clostridia   | 0                  | 0                   | 0                  | 0                   |
| <b>seq445</b>  | Firmicutes    | Clostridia   | 0                  | 0                   | 0                  | 0                   |
| <b>seq464</b>  | Firmicutes    | Clostridia   | 0                  | 0                   | 0                  | 0                   |
| <b>seq528</b>  | Firmicutes    | Clostridia   | 0                  | 0                   | 0                  | 0                   |
| <b>seq606</b>  | Firmicutes    | Clostridia   | 0                  | 0                   | 0                  | 0                   |
| <b>seq626</b>  | Firmicutes    | Clostridia   | 0                  | 0                   | 0                  | 0                   |
| <b>seq712</b>  | Firmicutes    | Clostridia   | 0                  | 0                   | 0                  | 0                   |
| <b>seq774</b>  | Firmicutes    | Clostridia   | 0                  | 0                   | 0                  | 0                   |
| <b>seq801</b>  | Firmicutes    | Clostridia   | 0                  | 0                   | 0                  | 0                   |

Sequence Count Table

|                | <b>Phylum</b> | <b>Class</b> | <b>Subject10WK0</b> | <b>Subject10WK12</b> | <b>Subject22WK0</b> | <b>Subject22WK12</b> |
|----------------|---------------|--------------|---------------------|----------------------|---------------------|----------------------|
| <b>seq1189</b> | Firmicutes    | Clostridia   | 84                  | 0                    | 0                   | 0                    |
| <b>seq344</b>  | Firmicutes    | Clostridia   | 17                  | 0                    | 0                   | 21                   |
| <b>seq810</b>  | Firmicutes    | Clostridia   | 116                 | 61                   | 0                   | 0                    |
| <b>seq954</b>  | Firmicutes    | Clostridia   | 0                   | 0                    | 0                   | 0                    |
| <b>seq1194</b> | Firmicutes    | Clostridia   | 0                   | 0                    | 26                  | 0                    |
| <b>seq1739</b> | Firmicutes    | Clostridia   | 0                   | 0                    | 0                   | 0                    |
| <b>seq1343</b> | Firmicutes    | Clostridia   | 0                   | 0                    | 0                   | 0                    |
| <b>seq1492</b> | Firmicutes    | Clostridia   | 0                   | 0                    | 0                   | 0                    |
| <b>seq452</b>  | Firmicutes    | Clostridia   | 0                   | 0                    | 103                 | 89                   |
| <b>seq1348</b> | Firmicutes    | Clostridia   | 0                   | 0                    | 0                   | 0                    |
| <b>seq520</b>  | Firmicutes    | Clostridia   | 0                   | 0                    | 0                   | 0                    |
| <b>seq613</b>  | Firmicutes    | Clostridia   | 20                  | 9                    | 0                   | 0                    |
| <b>seq1283</b> | Firmicutes    | Clostridia   | 0                   | 0                    | 0                   | 0                    |
| <b>seq1886</b> | Firmicutes    | Clostridia   | 0                   | 0                    | 0                   | 0                    |
| <b>seq66</b>   | Firmicutes    | Clostridia   | 0                   | 0                    | 399                 | 243                  |
| <b>seq81</b>   | Firmicutes    | Clostridia   | 0                   | 0                    | 45                  | 64                   |
| <b>seq139</b>  | Firmicutes    | Clostridia   | 682                 | 356                  | 0                   | 0                    |
| <b>seq141</b>  | Firmicutes    | Clostridia   | 0                   | 0                    | 46                  | 52                   |
| <b>seq162</b>  | Firmicutes    | Clostridia   | 2783                | 1807                 | 189                 | 68                   |
| <b>seq209</b>  | Firmicutes    | Clostridia   | 1234                | 552                  | 0                   | 0                    |
| <b>seq274</b>  | Firmicutes    | Clostridia   | 88                  | 32                   | 0                   | 0                    |
| <b>seq277</b>  | Firmicutes    | Clostridia   | 1308                | 821                  | 0                   | 0                    |
| <b>seq343</b>  | Firmicutes    | Clostridia   | 0                   | 0                    | 0                   | 0                    |
| <b>seq352</b>  | Firmicutes    | Clostridia   | 71                  | 34                   | 0                   | 0                    |
| <b>seq445</b>  | Firmicutes    | Clostridia   | 522                 | 281                  | 0                   | 0                    |
| <b>seq464</b>  | Firmicutes    | Clostridia   | 395                 | 205                  | 0                   | 0                    |
| <b>seq528</b>  | Firmicutes    | Clostridia   | 280                 | 157                  | 0                   | 0                    |
| <b>seq606</b>  | Firmicutes    | Clostridia   | 0                   | 0                    | 0                   | 0                    |
| <b>seq626</b>  | Firmicutes    | Clostridia   | 0                   | 0                    | 0                   | 0                    |
| <b>seq712</b>  | Firmicutes    | Clostridia   | 0                   | 0                    | 0                   | 0                    |
| <b>seq774</b>  | Firmicutes    | Clostridia   | 0                   | 0                    | 0                   | 0                    |
| <b>seq801</b>  | Firmicutes    | Clostridia   | 0                   | 0                    | 0                   | 0                    |



Sequence Count Table

|                | <b>Phylum</b> | <b>Class</b> | <b>Subject23WK0</b> | <b>Subject23WK12</b> | <b>Subject24WK0</b> | <b>Subject24WK12</b> |
|----------------|---------------|--------------|---------------------|----------------------|---------------------|----------------------|
| <b>seq1189</b> | Firmicutes    | Clostridia   | 0                   | 0                    | 0                   | 0                    |
| <b>seq344</b>  | Firmicutes    | Clostridia   | 32                  | 73                   | 80                  | 92                   |
| <b>seq810</b>  | Firmicutes    | Clostridia   | 0                   | 0                    | 0                   | 0                    |
| <b>seq954</b>  | Firmicutes    | Clostridia   | 0                   | 0                    | 45                  | 52                   |
| <b>seq1194</b> | Firmicutes    | Clostridia   | 0                   | 0                    | 0                   | 0                    |
| <b>seq1739</b> | Firmicutes    | Clostridia   | 0                   | 0                    | 0                   | 0                    |
| <b>seq1343</b> | Firmicutes    | Clostridia   | 0                   | 0                    | 0                   | 0                    |
| <b>seq1492</b> | Firmicutes    | Clostridia   | 0                   | 0                    | 0                   | 0                    |
| <b>seq452</b>  | Firmicutes    | Clostridia   | 28                  | 55                   | 0                   | 0                    |
| <b>seq1348</b> | Firmicutes    | Clostridia   | 0                   | 0                    | 0                   | 0                    |
| <b>seq520</b>  | Firmicutes    | Clostridia   | 0                   | 0                    | 0                   | 0                    |
| <b>seq613</b>  | Firmicutes    | Clostridia   | 0                   | 0                    | 0                   | 0                    |
| <b>seq1283</b> | Firmicutes    | Clostridia   | 0                   | 0                    | 0                   | 0                    |
| <b>seq1886</b> | Firmicutes    | Clostridia   | 0                   | 0                    | 0                   | 0                    |
| <b>seq66</b>   | Firmicutes    | Clostridia   | 690                 | 407                  | 496                 | 405                  |
| <b>seq81</b>   | Firmicutes    | Clostridia   | 235                 | 145                  | 142                 | 135                  |
| <b>seq139</b>  | Firmicutes    | Clostridia   | 0                   | 0                    | 9                   | 0                    |
| <b>seq141</b>  | Firmicutes    | Clostridia   | 64                  | 51                   | 113                 | 98                   |
| <b>seq162</b>  | Firmicutes    | Clostridia   | 47                  | 0                    | 0                   | 0                    |
| <b>seq209</b>  | Firmicutes    | Clostridia   | 0                   | 0                    | 0                   | 0                    |
| <b>seq274</b>  | Firmicutes    | Clostridia   | 0                   | 0                    | 0                   | 0                    |
| <b>seq277</b>  | Firmicutes    | Clostridia   | 0                   | 0                    | 0                   | 0                    |
| <b>seq343</b>  | Firmicutes    | Clostridia   | 0                   | 0                    | 0                   | 0                    |
| <b>seq352</b>  | Firmicutes    | Clostridia   | 0                   | 5                    | 0                   | 0                    |
| <b>seq445</b>  | Firmicutes    | Clostridia   | 0                   | 0                    | 0                   | 0                    |
| <b>seq464</b>  | Firmicutes    | Clostridia   | 0                   | 0                    | 0                   | 0                    |
| <b>seq528</b>  | Firmicutes    | Clostridia   | 0                   | 0                    | 0                   | 0                    |
| <b>seq606</b>  | Firmicutes    | Clostridia   | 0                   | 0                    | 0                   | 0                    |
| <b>seq626</b>  | Firmicutes    | Clostridia   | 0                   | 0                    | 0                   | 0                    |
| <b>seq712</b>  | Firmicutes    | Clostridia   | 0                   | 0                    | 0                   | 0                    |
| <b>seq774</b>  | Firmicutes    | Clostridia   | 0                   | 0                    | 0                   | 0                    |
| <b>seq801</b>  | Firmicutes    | Clostridia   | 0                   | 0                    | 0                   | 0                    |

Sequence Count Table

|                | <b>Phylum</b> | <b>Class</b> | <b>Subject11WK0</b> | <b>Subject11WK12</b> | <b>Subject12WK0</b> | <b>Subject12WK12</b> |
|----------------|---------------|--------------|---------------------|----------------------|---------------------|----------------------|
| <b>seq1189</b> | Firmicutes    | Clostridia   | 0                   | 0                    | 0                   | 0                    |
| <b>seq344</b>  | Firmicutes    | Clostridia   | 0                   | 0                    | 22                  | 49                   |
| <b>seq810</b>  | Firmicutes    | Clostridia   | 0                   | 0                    | 0                   | 0                    |
| <b>seq954</b>  | Firmicutes    | Clostridia   | 0                   | 0                    | 0                   | 0                    |
| <b>seq1194</b> | Firmicutes    | Clostridia   | 0                   | 0                    | 0                   | 0                    |
| <b>seq1739</b> | Firmicutes    | Clostridia   | 0                   | 0                    | 0                   | 0                    |
| <b>seq1343</b> | Firmicutes    | Clostridia   | 0                   | 0                    | 0                   | 0                    |
| <b>seq1492</b> | Firmicutes    | Clostridia   | 0                   | 0                    | 0                   | 0                    |
| <b>seq452</b>  | Firmicutes    | Clostridia   | 0                   | 0                    | 30                  | 47                   |
| <b>seq1348</b> | Firmicutes    | Clostridia   | 0                   | 0                    | 0                   | 0                    |
| <b>seq520</b>  | Firmicutes    | Clostridia   | 49                  | 0                    | 0                   | 0                    |
| <b>seq613</b>  | Firmicutes    | Clostridia   | 63                  | 13                   | 0                   | 0                    |
| <b>seq1283</b> | Firmicutes    | Clostridia   | 0                   | 0                    | 0                   | 0                    |
| <b>seq1886</b> | Firmicutes    | Clostridia   | 0                   | 0                    | 0                   | 0                    |
| <b>seq66</b>   | Firmicutes    | Clostridia   | 0                   | 0                    | 266                 | 837                  |
| <b>seq81</b>   | Firmicutes    | Clostridia   | 0                   | 0                    | 52                  | 556                  |
| <b>seq139</b>  | Firmicutes    | Clostridia   | 842                 | 1759                 | 0                   | 0                    |
| <b>seq141</b>  | Firmicutes    | Clostridia   | 0                   | 0                    | 101                 | 337                  |
| <b>seq162</b>  | Firmicutes    | Clostridia   | 0                   | 0                    | 0                   | 0                    |
| <b>seq209</b>  | Firmicutes    | Clostridia   | 846                 | 464                  | 0                   | 0                    |
| <b>seq274</b>  | Firmicutes    | Clostridia   | 153                 | 94                   | 0                   | 0                    |
| <b>seq277</b>  | Firmicutes    | Clostridia   | 0                   | 0                    | 0                   | 0                    |
| <b>seq343</b>  | Firmicutes    | Clostridia   | 0                   | 198                  | 0                   | 0                    |
| <b>seq352</b>  | Firmicutes    | Clostridia   | 249                 | 156                  | 0                   | 0                    |
| <b>seq445</b>  | Firmicutes    | Clostridia   | 0                   | 0                    | 0                   | 0                    |
| <b>seq464</b>  | Firmicutes    | Clostridia   | 0                   | 0                    | 0                   | 0                    |
| <b>seq528</b>  | Firmicutes    | Clostridia   | 0                   | 0                    | 0                   | 0                    |
| <b>seq606</b>  | Firmicutes    | Clostridia   | 0                   | 0                    | 0                   | 0                    |
| <b>seq626</b>  | Firmicutes    | Clostridia   | 0                   | 0                    | 0                   | 0                    |
| <b>seq712</b>  | Firmicutes    | Clostridia   | 0                   | 0                    | 0                   | 0                    |
| <b>seq774</b>  | Firmicutes    | Clostridia   | 0                   | 0                    | 0                   | 0                    |
| <b>seq801</b>  | Firmicutes    | Clostridia   | 0                   | 0                    | 0                   | 0                    |

Sequence Count Table

|                | <b>Phylum</b> | <b>Class</b> | <b>Subject25WK0</b> | <b>Subject25WK12</b> | <b>Subject38WK0</b> | <b>Subject38WK12</b> |
|----------------|---------------|--------------|---------------------|----------------------|---------------------|----------------------|
| <b>seq1189</b> | Firmicutes    | Clostridia   | 0                   | 0                    | 0                   | 0                    |
| <b>seq344</b>  | Firmicutes    | Clostridia   | 0                   | 0                    | 0                   | 0                    |
| <b>seq810</b>  | Firmicutes    | Clostridia   | 0                   | 0                    | 0                   | 0                    |
| <b>seq954</b>  | Firmicutes    | Clostridia   | 0                   | 0                    | 0                   | 0                    |
| <b>seq1194</b> | Firmicutes    | Clostridia   | 24                  | 0                    | 0                   | 0                    |
| <b>seq1739</b> | Firmicutes    | Clostridia   | 0                   | 0                    | 0                   | 0                    |
| <b>seq1343</b> | Firmicutes    | Clostridia   | 0                   | 0                    | 0                   | 0                    |
| <b>seq1492</b> | Firmicutes    | Clostridia   | 0                   | 0                    | 0                   | 0                    |
| <b>seq452</b>  | Firmicutes    | Clostridia   | 0                   | 0                    | 0                   | 0                    |
| <b>seq1348</b> | Firmicutes    | Clostridia   | 0                   | 0                    | 0                   | 0                    |
| <b>seq520</b>  | Firmicutes    | Clostridia   | 0                   | 0                    | 0                   | 0                    |
| <b>seq613</b>  | Firmicutes    | Clostridia   | 0                   | 0                    | 0                   | 0                    |
| <b>seq1283</b> | Firmicutes    | Clostridia   | 0                   | 0                    | 0                   | 0                    |
| <b>seq1886</b> | Firmicutes    | Clostridia   | 0                   | 0                    | 0                   | 0                    |
| <b>seq66</b>   | Firmicutes    | Clostridia   | 62                  | 0                    | 0                   | 0                    |
| <b>seq81</b>   | Firmicutes    | Clostridia   | 68                  | 0                    | 0                   | 0                    |
| <b>seq139</b>  | Firmicutes    | Clostridia   | 0                   | 0                    | 0                   | 0                    |
| <b>seq141</b>  | Firmicutes    | Clostridia   | 33                  | 0                    | 0                   | 0                    |
| <b>seq162</b>  | Firmicutes    | Clostridia   | 0                   | 0                    | 0                   | 0                    |
| <b>seq209</b>  | Firmicutes    | Clostridia   | 0                   | 0                    | 0                   | 0                    |
| <b>seq274</b>  | Firmicutes    | Clostridia   | 0                   | 0                    | 0                   | 0                    |
| <b>seq277</b>  | Firmicutes    | Clostridia   | 0                   | 0                    | 0                   | 0                    |
| <b>seq343</b>  | Firmicutes    | Clostridia   | 0                   | 0                    | 0                   | 0                    |
| <b>seq352</b>  | Firmicutes    | Clostridia   | 0                   | 0                    | 0                   | 0                    |
| <b>seq445</b>  | Firmicutes    | Clostridia   | 0                   | 0                    | 0                   | 0                    |
| <b>seq464</b>  | Firmicutes    | Clostridia   | 0                   | 0                    | 0                   | 0                    |
| <b>seq528</b>  | Firmicutes    | Clostridia   | 0                   | 0                    | 0                   | 0                    |
| <b>seq606</b>  | Firmicutes    | Clostridia   | 0                   | 0                    | 0                   | 0                    |
| <b>seq626</b>  | Firmicutes    | Clostridia   | 0                   | 0                    | 0                   | 0                    |
| <b>seq712</b>  | Firmicutes    | Clostridia   | 0                   | 0                    | 0                   | 0                    |
| <b>seq774</b>  | Firmicutes    | Clostridia   | 0                   | 0                    | 0                   | 0                    |
| <b>seq801</b>  | Firmicutes    | Clostridia   | 0                   | 0                    | 0                   | 0                    |

Sequence Count Table

|                | <b>Phylum</b> | <b>Class</b> | <b>Subject31WK0</b> | <b>Subject31WK12</b> | <b>Subject32WK0</b> | <b>Subject32WK12</b> |
|----------------|---------------|--------------|---------------------|----------------------|---------------------|----------------------|
| <b>seq1189</b> | Firmicutes    | Clostridia   | 0                   | 0                    | 0                   | 0                    |
| <b>seq344</b>  | Firmicutes    | Clostridia   | 0                   | 0                    | 0                   | 0                    |
| <b>seq810</b>  | Firmicutes    | Clostridia   | 0                   | 0                    | 0                   | 0                    |
| <b>seq954</b>  | Firmicutes    | Clostridia   | 0                   | 0                    | 0                   | 0                    |
| <b>seq1194</b> | Firmicutes    | Clostridia   | 0                   | 0                    | 0                   | 0                    |
| <b>seq1739</b> | Firmicutes    | Clostridia   | 0                   | 0                    | 0                   | 0                    |
| <b>seq1343</b> | Firmicutes    | Clostridia   | 0                   | 0                    | 0                   | 0                    |
| <b>seq1492</b> | Firmicutes    | Clostridia   | 0                   | 0                    | 0                   | 0                    |
| <b>seq452</b>  | Firmicutes    | Clostridia   | 0                   | 0                    | 0                   | 0                    |
| <b>seq1348</b> | Firmicutes    | Clostridia   | 0                   | 0                    | 0                   | 0                    |
| <b>seq520</b>  | Firmicutes    | Clostridia   | 0                   | 0                    | 0                   | 0                    |
| <b>seq613</b>  | Firmicutes    | Clostridia   | 0                   | 0                    | 0                   | 0                    |
| <b>seq1283</b> | Firmicutes    | Clostridia   | 0                   | 0                    | 0                   | 0                    |
| <b>seq1886</b> | Firmicutes    | Clostridia   | 0                   | 0                    | 0                   | 0                    |
| <b>seq66</b>   | Firmicutes    | Clostridia   | 0                   | 0                    | 0                   | 0                    |
| <b>seq81</b>   | Firmicutes    | Clostridia   | 0                   | 0                    | 770                 | 0                    |
| <b>seq139</b>  | Firmicutes    | Clostridia   | 0                   | 0                    | 299                 | 0                    |
| <b>seq141</b>  | Firmicutes    | Clostridia   | 0                   | 0                    | 54                  | 0                    |
| <b>seq162</b>  | Firmicutes    | Clostridia   | 0                   | 0                    | 0                   | 0                    |
| <b>seq209</b>  | Firmicutes    | Clostridia   | 0                   | 0                    | 364                 | 0                    |
| <b>seq274</b>  | Firmicutes    | Clostridia   | 0                   | 0                    | 16                  | 0                    |
| <b>seq277</b>  | Firmicutes    | Clostridia   | 0                   | 0                    | 0                   | 0                    |
| <b>seq343</b>  | Firmicutes    | Clostridia   | 0                   | 0                    | 0                   | 0                    |
| <b>seq352</b>  | Firmicutes    | Clostridia   | 0                   | 0                    | 0                   | 0                    |
| <b>seq445</b>  | Firmicutes    | Clostridia   | 0                   | 0                    | 0                   | 0                    |
| <b>seq464</b>  | Firmicutes    | Clostridia   | 0                   | 0                    | 76                  | 0                    |
| <b>seq528</b>  | Firmicutes    | Clostridia   | 0                   | 0                    | 0                   | 0                    |
| <b>seq606</b>  | Firmicutes    | Clostridia   | 0                   | 0                    | 0                   | 0                    |
| <b>seq626</b>  | Firmicutes    | Clostridia   | 0                   | 0                    | 0                   | 0                    |
| <b>seq712</b>  | Firmicutes    | Clostridia   | 0                   | 0                    | 0                   | 0                    |
| <b>seq774</b>  | Firmicutes    | Clostridia   | 0                   | 0                    | 15                  | 0                    |
| <b>seq801</b>  | Firmicutes    | Clostridia   | 0                   | 0                    | 0                   | 0                    |

Sequence Count Table

|                | <b>Phylum</b> | <b>Class</b> | <b>Subject13WK0</b> | <b>Subject13WK12</b> | <b>Subject39WK0</b> | <b>Subject39WK12</b> |
|----------------|---------------|--------------|---------------------|----------------------|---------------------|----------------------|
| <b>seq1189</b> | Firmicutes    | Clostridia   | 0                   | 0                    | 0                   | 0                    |
| <b>seq344</b>  | Firmicutes    | Clostridia   | 0                   | 0                    | 0                   | 0                    |
| <b>seq810</b>  | Firmicutes    | Clostridia   | 0                   | 0                    | 0                   | 0                    |
| <b>seq954</b>  | Firmicutes    | Clostridia   | 0                   | 0                    | 0                   | 0                    |
| <b>seq1194</b> | Firmicutes    | Clostridia   | 11                  | 0                    | 0                   | 0                    |
| <b>seq1739</b> | Firmicutes    | Clostridia   | 0                   | 0                    | 0                   | 0                    |
| <b>seq1343</b> | Firmicutes    | Clostridia   | 0                   | 0                    | 0                   | 0                    |
| <b>seq1492</b> | Firmicutes    | Clostridia   | 0                   | 0                    | 0                   | 0                    |
| <b>seq452</b>  | Firmicutes    | Clostridia   | 0                   | 0                    | 0                   | 25                   |
| <b>seq1348</b> | Firmicutes    | Clostridia   | 0                   | 0                    | 0                   | 0                    |
| <b>seq520</b>  | Firmicutes    | Clostridia   | 0                   | 0                    | 0                   | 0                    |
| <b>seq613</b>  | Firmicutes    | Clostridia   | 0                   | 0                    | 0                   | 0                    |
| <b>seq1283</b> | Firmicutes    | Clostridia   | 0                   | 0                    | 0                   | 0                    |
| <b>seq1886</b> | Firmicutes    | Clostridia   | 0                   | 0                    | 0                   | 0                    |
| <b>seq66</b>   | Firmicutes    | Clostridia   | 246                 | 234                  | 0                   | 946                  |
| <b>seq81</b>   | Firmicutes    | Clostridia   | 196                 | 73                   | 0                   | 1294                 |
| <b>seq139</b>  | Firmicutes    | Clostridia   | 0                   | 14                   | 0                   | 25                   |
| <b>seq141</b>  | Firmicutes    | Clostridia   | 49                  | 43                   | 0                   | 64                   |
| <b>seq162</b>  | Firmicutes    | Clostridia   | 0                   | 0                    | 0                   | 34                   |
| <b>seq209</b>  | Firmicutes    | Clostridia   | 0                   | 48                   | 0                   | 0                    |
| <b>seq274</b>  | Firmicutes    | Clostridia   | 0                   | 0                    | 0                   | 0                    |
| <b>seq277</b>  | Firmicutes    | Clostridia   | 0                   | 0                    | 0                   | 82                   |
| <b>seq343</b>  | Firmicutes    | Clostridia   | 72                  | 0                    | 0                   | 59                   |
| <b>seq352</b>  | Firmicutes    | Clostridia   | 0                   | 3                    | 0                   | 0                    |
| <b>seq445</b>  | Firmicutes    | Clostridia   | 0                   | 0                    | 0                   | 0                    |
| <b>seq464</b>  | Firmicutes    | Clostridia   | 0                   | 0                    | 0                   | 0                    |
| <b>seq528</b>  | Firmicutes    | Clostridia   | 0                   | 0                    | 0                   | 0                    |
| <b>seq606</b>  | Firmicutes    | Clostridia   | 0                   | 0                    | 0                   | 0                    |
| <b>seq626</b>  | Firmicutes    | Clostridia   | 0                   | 0                    | 0                   | 0                    |
| <b>seq712</b>  | Firmicutes    | Clostridia   | 0                   | 0                    | 0                   | 0                    |
| <b>seq774</b>  | Firmicutes    | Clostridia   | 0                   | 0                    | 0                   | 0                    |
| <b>seq801</b>  | Firmicutes    | Clostridia   | 0                   | 0                    | 0                   | 0                    |

Sequence Count Table

|                | <b>Phylum</b> | <b>Class</b> | <b>Subject26WK0</b> | <b>Subject26WK12</b> | <b>Subject14WK0</b> | <b>Subject14WK12</b> |
|----------------|---------------|--------------|---------------------|----------------------|---------------------|----------------------|
| <b>seq1189</b> | Firmicutes    | Clostridia   | 0                   | 0                    | 0                   | 0                    |
| <b>seq344</b>  | Firmicutes    | Clostridia   | 0                   | 0                    | 102                 | 41                   |
| <b>seq810</b>  | Firmicutes    | Clostridia   | 0                   | 0                    | 0                   | 0                    |
| <b>seq954</b>  | Firmicutes    | Clostridia   | 0                   | 0                    | 0                   | 0                    |
| <b>seq1194</b> | Firmicutes    | Clostridia   | 0                   | 0                    | 0                   | 0                    |
| <b>seq1739</b> | Firmicutes    | Clostridia   | 0                   | 0                    | 0                   | 0                    |
| <b>seq1343</b> | Firmicutes    | Clostridia   | 0                   | 0                    | 0                   | 0                    |
| <b>seq1492</b> | Firmicutes    | Clostridia   | 0                   | 4                    | 0                   | 0                    |
| <b>seq452</b>  | Firmicutes    | Clostridia   | 0                   | 0                    | 64                  | 39                   |
| <b>seq1348</b> | Firmicutes    | Clostridia   | 0                   | 0                    | 0                   | 0                    |
| <b>seq520</b>  | Firmicutes    | Clostridia   | 141                 | 229                  | 0                   | 42                   |
| <b>seq613</b>  | Firmicutes    | Clostridia   | 43                  | 37                   | 0                   | 0                    |
| <b>seq1283</b> | Firmicutes    | Clostridia   | 0                   | 61                   | 0                   | 0                    |
| <b>seq1886</b> | Firmicutes    | Clostridia   | 0                   | 0                    | 0                   | 0                    |
| <b>seq66</b>   | Firmicutes    | Clostridia   | 259                 | 315                  | 296                 | 186                  |
| <b>seq81</b>   | Firmicutes    | Clostridia   | 0                   | 0                    | 33                  | 37                   |
| <b>seq139</b>  | Firmicutes    | Clostridia   | 941                 | 692                  | 0                   | 0                    |
| <b>seq141</b>  | Firmicutes    | Clostridia   | 597                 | 827                  | 15                  | 22                   |
| <b>seq162</b>  | Firmicutes    | Clostridia   | 137                 | 158                  | 0                   | 0                    |
| <b>seq209</b>  | Firmicutes    | Clostridia   | 576                 | 270                  | 0                   | 13                   |
| <b>seq274</b>  | Firmicutes    | Clostridia   | 265                 | 229                  | 0                   | 0                    |
| <b>seq277</b>  | Firmicutes    | Clostridia   | 0                   | 0                    | 0                   | 0                    |
| <b>seq343</b>  | Firmicutes    | Clostridia   | 0                   | 0                    | 0                   | 0                    |
| <b>seq352</b>  | Firmicutes    | Clostridia   | 76                  | 71                   | 0                   | 0                    |
| <b>seq445</b>  | Firmicutes    | Clostridia   | 0                   | 0                    | 0                   | 0                    |
| <b>seq464</b>  | Firmicutes    | Clostridia   | 0                   | 0                    | 0                   | 0                    |
| <b>seq528</b>  | Firmicutes    | Clostridia   | 0                   | 0                    | 0                   | 0                    |
| <b>seq606</b>  | Firmicutes    | Clostridia   | 101                 | 127                  | 0                   | 0                    |
| <b>seq626</b>  | Firmicutes    | Clostridia   | 0                   | 0                    | 0                   | 0                    |
| <b>seq712</b>  | Firmicutes    | Clostridia   | 0                   | 0                    | 0                   | 0                    |
| <b>seq774</b>  | Firmicutes    | Clostridia   | 0                   | 0                    | 0                   | 0                    |
| <b>seq801</b>  | Firmicutes    | Clostridia   | 0                   | 0                    | 0                   | 0                    |

Sequence Count Table

|                | <b>Phylum</b> | <b>Class</b> | <b>Subject27WK0</b> | <b>Subject27WK12</b> | <b>Subject15WK0</b> | <b>Subject15WK12</b> |
|----------------|---------------|--------------|---------------------|----------------------|---------------------|----------------------|
| <b>seq1189</b> | Firmicutes    | Clostridia   | 0                   | 0                    | 0                   | 0                    |
| <b>seq344</b>  | Firmicutes    | Clostridia   | 20                  | 39                   | 14                  | 7                    |
| <b>seq810</b>  | Firmicutes    | Clostridia   | 17                  | 0                    | 0                   | 0                    |
| <b>seq954</b>  | Firmicutes    | Clostridia   | 0                   | 0                    | 0                   | 0                    |
| <b>seq1194</b> | Firmicutes    | Clostridia   | 0                   | 0                    | 0                   | 0                    |
| <b>seq1739</b> | Firmicutes    | Clostridia   | 0                   | 0                    | 11                  | 0                    |
| <b>seq1343</b> | Firmicutes    | Clostridia   | 0                   | 0                    | 0                   | 0                    |
| <b>seq1492</b> | Firmicutes    | Clostridia   | 0                   | 0                    | 0                   | 0                    |
| <b>seq452</b>  | Firmicutes    | Clostridia   | 0                   | 0                    | 0                   | 0                    |
| <b>seq1348</b> | Firmicutes    | Clostridia   | 0                   | 0                    | 0                   | 0                    |
| <b>seq520</b>  | Firmicutes    | Clostridia   | 0                   | 0                    | 0                   | 0                    |
| <b>seq613</b>  | Firmicutes    | Clostridia   | 0                   | 0                    | 0                   | 0                    |
| <b>seq1283</b> | Firmicutes    | Clostridia   | 0                   | 0                    | 0                   | 0                    |
| <b>seq1886</b> | Firmicutes    | Clostridia   | 0                   | 0                    | 0                   | 0                    |
| <b>seq66</b>   | Firmicutes    | Clostridia   | 729                 | 295                  | 832                 | 955                  |
| <b>seq81</b>   | Firmicutes    | Clostridia   | 130                 | 279                  | 869                 | 1953                 |
| <b>seq139</b>  | Firmicutes    | Clostridia   | 60                  | 33                   | 28                  | 45                   |
| <b>seq141</b>  | Firmicutes    | Clostridia   | 71                  | 87                   | 58                  | 46                   |
| <b>seq162</b>  | Firmicutes    | Clostridia   | 0                   | 0                    | 0                   | 115                  |
| <b>seq209</b>  | Firmicutes    | Clostridia   | 29                  | 29                   | 0                   | 0                    |
| <b>seq274</b>  | Firmicutes    | Clostridia   | 0                   | 0                    | 0                   | 0                    |
| <b>seq277</b>  | Firmicutes    | Clostridia   | 0                   | 0                    | 0                   | 0                    |
| <b>seq343</b>  | Firmicutes    | Clostridia   | 0                   | 0                    | 142                 | 205                  |
| <b>seq352</b>  | Firmicutes    | Clostridia   | 37                  | 14                   | 14                  | 28                   |
| <b>seq445</b>  | Firmicutes    | Clostridia   | 0                   | 18                   | 61                  | 63                   |
| <b>seq464</b>  | Firmicutes    | Clostridia   | 0                   | 0                    | 0                   | 0                    |
| <b>seq528</b>  | Firmicutes    | Clostridia   | 131                 | 136                  | 0                   | 0                    |
| <b>seq606</b>  | Firmicutes    | Clostridia   | 0                   | 0                    | 0                   | 0                    |
| <b>seq626</b>  | Firmicutes    | Clostridia   | 0                   | 0                    | 97                  | 217                  |
| <b>seq712</b>  | Firmicutes    | Clostridia   | 161                 | 202                  | 0                   | 0                    |
| <b>seq774</b>  | Firmicutes    | Clostridia   | 0                   | 0                    | 0                   | 0                    |
| <b>seq801</b>  | Firmicutes    | Clostridia   | 0                   | 0                    | 0                   | 0                    |

Sequence Count Table

|                | <b>Phylum</b> | <b>Class</b> | <b>Δ</b> |  |  |  |
|----------------|---------------|--------------|----------|--|--|--|
| <b>seq1189</b> | Firmicutes    | Clostridia   |          |  |  |  |
| <b>seq344</b>  | Firmicutes    | Clostridia   |          |  |  |  |
| <b>seq810</b>  | Firmicutes    | Clostridia   |          |  |  |  |
| <b>seq954</b>  | Firmicutes    | Clostridia   |          |  |  |  |
| <b>seq1194</b> | Firmicutes    | Clostridia   |          |  |  |  |
| <b>seq1739</b> | Firmicutes    | Clostridia   |          |  |  |  |
| <b>seq1343</b> | Firmicutes    | Clostridia   |          |  |  |  |
| <b>seq1492</b> | Firmicutes    | Clostridia   |          |  |  |  |
| <b>seq452</b>  | Firmicutes    | Clostridia   |          |  |  |  |
| <b>seq1348</b> | Firmicutes    | Clostridia   |          |  |  |  |
| <b>seq520</b>  | Firmicutes    | Clostridia   |          |  |  |  |
| <b>seq613</b>  | Firmicutes    | Clostridia   |          |  |  |  |
| <b>seq1283</b> | Firmicutes    | Clostridia   |          |  |  |  |
| <b>seq1886</b> | Firmicutes    | Clostridia   |          |  |  |  |
| <b>seq66</b>   | Firmicutes    | Clostridia   |          |  |  |  |
| <b>seq81</b>   | Firmicutes    | Clostridia   |          |  |  |  |
| <b>seq139</b>  | Firmicutes    | Clostridia   |          |  |  |  |
| <b>seq141</b>  | Firmicutes    | Clostridia   |          |  |  |  |
| <b>seq162</b>  | Firmicutes    | Clostridia   |          |  |  |  |
| <b>seq209</b>  | Firmicutes    | Clostridia   |          |  |  |  |
| <b>seq274</b>  | Firmicutes    | Clostridia   |          |  |  |  |
| <b>seq277</b>  | Firmicutes    | Clostridia   |          |  |  |  |
| <b>seq343</b>  | Firmicutes    | Clostridia   |          |  |  |  |
| <b>seq352</b>  | Firmicutes    | Clostridia   |          |  |  |  |
| <b>seq445</b>  | Firmicutes    | Clostridia   |          |  |  |  |
| <b>seq464</b>  | Firmicutes    | Clostridia   |          |  |  |  |
| <b>seq528</b>  | Firmicutes    | Clostridia   |          |  |  |  |
| <b>seq606</b>  | Firmicutes    | Clostridia   |          |  |  |  |
| <b>seq626</b>  | Firmicutes    | Clostridia   |          |  |  |  |
| <b>seq712</b>  | Firmicutes    | Clostridia   |          |  |  |  |
| <b>seq774</b>  | Firmicutes    | Clostridia   |          |  |  |  |
| <b>seq801</b>  | Firmicutes    | Clostridia   |          |  |  |  |



Sequence Count Table

|                | <b>Phylum</b> | <b>Class</b> | <b>Order</b>  | <b>Family</b>   |
|----------------|---------------|--------------|---------------|-----------------|
| <b>seq813</b>  | Firmicutes    | Clostridia   | Clostridiales | Lachnospiraceae |
| <b>seq870</b>  | Firmicutes    | Clostridia   | Clostridiales | Lachnospiraceae |
| <b>seq933</b>  | Firmicutes    | Clostridia   | Clostridiales | Lachnospiraceae |
| <b>seq953</b>  | Firmicutes    | Clostridia   | Clostridiales | Lachnospiraceae |
| <b>seq956</b>  | Firmicutes    | Clostridia   | Clostridiales | Lachnospiraceae |
| <b>seq997</b>  | Firmicutes    | Clostridia   | Clostridiales | Lachnospiraceae |
| <b>seq1057</b> | Firmicutes    | Clostridia   | Clostridiales | Lachnospiraceae |
| <b>seq1070</b> | Firmicutes    | Clostridia   | Clostridiales | Lachnospiraceae |
| <b>seq1108</b> | Firmicutes    | Clostridia   | Clostridiales | Lachnospiraceae |
| <b>seq1122</b> | Firmicutes    | Clostridia   | Clostridiales | Lachnospiraceae |
| <b>seq1164</b> | Firmicutes    | Clostridia   | Clostridiales | Lachnospiraceae |
| <b>seq1334</b> | Firmicutes    | Clostridia   | Clostridiales | Lachnospiraceae |
| <b>seq1369</b> | Firmicutes    | Clostridia   | Clostridiales | Lachnospiraceae |
| <b>seq1414</b> | Firmicutes    | Clostridia   | Clostridiales | Lachnospiraceae |
| <b>seq1494</b> | Firmicutes    | Clostridia   | Clostridiales | Lachnospiraceae |
| <b>seq1687</b> | Firmicutes    | Clostridia   | Clostridiales | Lachnospiraceae |
| <b>seq63</b>   | Firmicutes    | Clostridia   | Clostridiales | Lachnospiraceae |
| <b>seq78</b>   | Firmicutes    | Clostridia   | Clostridiales | Lachnospiraceae |
| <b>seq188</b>  | Firmicutes    | Clostridia   | Clostridiales | Lachnospiraceae |
| <b>seq545</b>  | Firmicutes    | Clostridia   | Clostridiales | Lachnospiraceae |
| <b>seq928</b>  | Firmicutes    | Clostridia   | Clostridiales | Lachnospiraceae |
| <b>seq1027</b> | Firmicutes    | Clostridia   | Clostridiales | Lachnospiraceae |
| <b>seq1029</b> | Firmicutes    | Clostridia   | Clostridiales | Lachnospiraceae |
| <b>seq1718</b> | Firmicutes    | Clostridia   | Clostridiales | Lachnospiraceae |
| <b>seq236</b>  | Firmicutes    | Clostridia   | Clostridiales | Lachnospiraceae |
| <b>seq238</b>  | Firmicutes    | Clostridia   | Clostridiales | Lachnospiraceae |
| <b>seq950</b>  | Firmicutes    | Clostridia   | Clostridiales | Lachnospiraceae |
| <b>seq48</b>   | Firmicutes    | Clostridia   | Clostridiales | Lachnospiraceae |
| <b>seq404</b>  | Firmicutes    | Clostridia   | Clostridiales | Lachnospiraceae |
| <b>seq898</b>  | Firmicutes    | Clostridia   | Clostridiales | Lachnospiraceae |
| <b>seq914</b>  | Firmicutes    | Clostridia   | Clostridiales | Lachnospiraceae |
| <b>seq1211</b> | Firmicutes    | Clostridia   | Clostridiales | Lachnospiraceae |

Sequence Count Table

|                | <b>Phylum</b> | <b>Class</b> | <b>Genus</b>                 | <b>Species</b> |
|----------------|---------------|--------------|------------------------------|----------------|
| <b>seq813</b>  | Firmicutes    | Clostridia   | Lachnoclostridium            |                |
| <b>seq870</b>  | Firmicutes    | Clostridia   | Lachnoclostridium            |                |
| <b>seq933</b>  | Firmicutes    | Clostridia   | Lachnoclostridium            |                |
| <b>seq953</b>  | Firmicutes    | Clostridia   | Lachnoclostridium            |                |
| <b>seq956</b>  | Firmicutes    | Clostridia   | Lachnoclostridium            |                |
| <b>seq997</b>  | Firmicutes    | Clostridia   | Lachnoclostridium            |                |
| <b>seq1057</b> | Firmicutes    | Clostridia   | Lachnoclostridium            |                |
| <b>seq1070</b> | Firmicutes    | Clostridia   | Lachnoclostridium            |                |
| <b>seq1108</b> | Firmicutes    | Clostridia   | Lachnoclostridium            |                |
| <b>seq1122</b> | Firmicutes    | Clostridia   | Lachnoclostridium            |                |
| <b>seq1164</b> | Firmicutes    | Clostridia   | Lachnoclostridium            |                |
| <b>seq1334</b> | Firmicutes    | Clostridia   | Lachnoclostridium            |                |
| <b>seq1369</b> | Firmicutes    | Clostridia   | Lachnoclostridium            |                |
| <b>seq1414</b> | Firmicutes    | Clostridia   | Lachnoclostridium            |                |
| <b>seq1494</b> | Firmicutes    | Clostridia   | Lachnoclostridium            |                |
| <b>seq1687</b> | Firmicutes    | Clostridia   | Lachnoclostridium            |                |
| <b>seq63</b>   | Firmicutes    | Clostridia   | Lachnospira                  | pectinoschiza  |
| <b>seq78</b>   | Firmicutes    | Clostridia   | Lachnospira                  | pectinoschiza  |
| <b>seq188</b>  | Firmicutes    | Clostridia   | Lachnospira                  |                |
| <b>seq545</b>  | Firmicutes    | Clostridia   | Lachnospira                  |                |
| <b>seq928</b>  | Firmicutes    | Clostridia   | Lachnospira                  |                |
| <b>seq1027</b> | Firmicutes    | Clostridia   | Lachnospira                  |                |
| <b>seq1029</b> | Firmicutes    | Clostridia   | Lachnospira                  |                |
| <b>seq1718</b> | Firmicutes    | Clostridia   | Lachnospira                  |                |
| <b>seq236</b>  | Firmicutes    | Clostridia   | Lachnospiraceae_FCS020_group |                |
| <b>seq238</b>  | Firmicutes    | Clostridia   | Lachnospiraceae_FCS020_group |                |
| <b>seq950</b>  | Firmicutes    | Clostridia   | Lachnospiraceae_FCS020_group |                |
| <b>seq48</b>   | Firmicutes    | Clostridia   | Lachnospiraceae_ND3007_group |                |
| <b>seq404</b>  | Firmicutes    | Clostridia   | Lachnospiraceae_ND3007_group |                |
| <b>seq898</b>  | Firmicutes    | Clostridia   | Lachnospiraceae_ND3007_group |                |
| <b>seq914</b>  | Firmicutes    | Clostridia   | Lachnospiraceae_ND3007_group |                |
| <b>seq1211</b> | Firmicutes    | Clostridia   | Lachnospiraceae_ND3007_group |                |

Sequence Count Table

|                | <b>Phylum</b> | <b>Class</b> | <b>Subject34WK0</b> | <b>Subject34WK12</b> | <b>Subject16WK0</b> | <b>Subject16WK12</b> |
|----------------|---------------|--------------|---------------------|----------------------|---------------------|----------------------|
| <b>seq813</b>  | Firmicutes    | Clostridia   | 0                   | 0                    | 0                   | 0                    |
| <b>seq870</b>  | Firmicutes    | Clostridia   | 0                   | 0                    | 0                   | 0                    |
| <b>seq933</b>  | Firmicutes    | Clostridia   | 0                   | 0                    | 0                   | 0                    |
| <b>seq953</b>  | Firmicutes    | Clostridia   | 0                   | 0                    | 0                   | 0                    |
| <b>seq956</b>  | Firmicutes    | Clostridia   | 0                   | 0                    | 0                   | 0                    |
| <b>seq997</b>  | Firmicutes    | Clostridia   | 0                   | 0                    | 0                   | 0                    |
| <b>seq1057</b> | Firmicutes    | Clostridia   | 0                   | 0                    | 0                   | 0                    |
| <b>seq1070</b> | Firmicutes    | Clostridia   | 0                   | 0                    | 0                   | 0                    |
| <b>seq1108</b> | Firmicutes    | Clostridia   | 0                   | 0                    | 0                   | 0                    |
| <b>seq1122</b> | Firmicutes    | Clostridia   | 0                   | 0                    | 0                   | 13                   |
| <b>seq1164</b> | Firmicutes    | Clostridia   | 0                   | 0                    | 0                   | 0                    |
| <b>seq1334</b> | Firmicutes    | Clostridia   | 0                   | 0                    | 0                   | 0                    |
| <b>seq1369</b> | Firmicutes    | Clostridia   | 0                   | 0                    | 0                   | 0                    |
| <b>seq1414</b> | Firmicutes    | Clostridia   | 0                   | 0                    | 0                   | 0                    |
| <b>seq1494</b> | Firmicutes    | Clostridia   | 0                   | 0                    | 0                   | 0                    |
| <b>seq1687</b> | Firmicutes    | Clostridia   | 0                   | 0                    | 0                   | 0                    |
| <b>seq63</b>   | Firmicutes    | Clostridia   | 10                  | 24                   | 0                   | 298                  |
| <b>seq78</b>   | Firmicutes    | Clostridia   | 0                   | 56                   | 1001                | 78                   |
| <b>seq188</b>  | Firmicutes    | Clostridia   | 0                   | 0                    | 22                  | 0                    |
| <b>seq545</b>  | Firmicutes    | Clostridia   | 0                   | 0                    | 0                   | 0                    |
| <b>seq928</b>  | Firmicutes    | Clostridia   | 0                   | 0                    | 0                   | 0                    |
| <b>seq1027</b> | Firmicutes    | Clostridia   | 0                   | 0                    | 0                   | 0                    |
| <b>seq1029</b> | Firmicutes    | Clostridia   | 0                   | 0                    | 0                   | 0                    |
| <b>seq1718</b> | Firmicutes    | Clostridia   | 0                   | 0                    | 0                   | 0                    |
| <b>seq236</b>  | Firmicutes    | Clostridia   | 0                   | 38                   | 51                  | 35                   |
| <b>seq238</b>  | Firmicutes    | Clostridia   | 0                   | 49                   | 35                  | 27                   |
| <b>seq950</b>  | Firmicutes    | Clostridia   | 0                   | 0                    | 0                   | 0                    |
| <b>seq48</b>   | Firmicutes    | Clostridia   | 72                  | 338                  | 809                 | 615                  |
| <b>seq404</b>  | Firmicutes    | Clostridia   | 0                   | 0                    | 0                   | 0                    |
| <b>seq898</b>  | Firmicutes    | Clostridia   | 0                   | 0                    | 0                   | 0                    |
| <b>seq914</b>  | Firmicutes    | Clostridia   | 0                   | 0                    | 0                   | 0                    |
| <b>seq1211</b> | Firmicutes    | Clostridia   | 0                   | 0                    | 0                   | 0                    |

Sequence Count Table

|                | <b>Phylum</b> | <b>Class</b> | <b>Subject17WK0</b> | <b>Subject17WK12</b> | <b>Subject1WK0</b> | <b>Subject1WK12</b> |
|----------------|---------------|--------------|---------------------|----------------------|--------------------|---------------------|
| <b>seq813</b>  | Firmicutes    | Clostridia   | 0                   | 0                    | 0                  | 0                   |
| <b>seq870</b>  | Firmicutes    | Clostridia   | 0                   | 0                    | 0                  | 0                   |
| <b>seq933</b>  | Firmicutes    | Clostridia   | 0                   | 0                    | 0                  | 0                   |
| <b>seq953</b>  | Firmicutes    | Clostridia   | 0                   | 0                    | 0                  | 0                   |
| <b>seq956</b>  | Firmicutes    | Clostridia   | 0                   | 0                    | 0                  | 0                   |
| <b>seq997</b>  | Firmicutes    | Clostridia   | 0                   | 0                    | 0                  | 0                   |
| <b>seq1057</b> | Firmicutes    | Clostridia   | 0                   | 0                    | 0                  | 0                   |
| <b>seq1070</b> | Firmicutes    | Clostridia   | 0                   | 0                    | 58                 | 56                  |
| <b>seq1108</b> | Firmicutes    | Clostridia   | 0                   | 0                    | 0                  | 0                   |
| <b>seq1122</b> | Firmicutes    | Clostridia   | 0                   | 0                    | 0                  | 0                   |
| <b>seq1164</b> | Firmicutes    | Clostridia   | 0                   | 0                    | 0                  | 0                   |
| <b>seq1334</b> | Firmicutes    | Clostridia   | 0                   | 0                    | 0                  | 0                   |
| <b>seq1369</b> | Firmicutes    | Clostridia   | 0                   | 0                    | 0                  | 0                   |
| <b>seq1414</b> | Firmicutes    | Clostridia   | 0                   | 0                    | 0                  | 0                   |
| <b>seq1494</b> | Firmicutes    | Clostridia   | 0                   | 0                    | 0                  | 0                   |
| <b>seq1687</b> | Firmicutes    | Clostridia   | 0                   | 0                    | 13                 | 0                   |
| <b>seq63</b>   | Firmicutes    | Clostridia   | 0                   | 0                    | 1969               | 1935                |
| <b>seq78</b>   | Firmicutes    | Clostridia   | 162                 | 63                   | 0                  | 0                   |
| <b>seq188</b>  | Firmicutes    | Clostridia   | 0                   | 0                    | 1206               | 1014                |
| <b>seq545</b>  | Firmicutes    | Clostridia   | 0                   | 0                    | 0                  | 0                   |
| <b>seq928</b>  | Firmicutes    | Clostridia   | 0                   | 0                    | 0                  | 0                   |
| <b>seq1027</b> | Firmicutes    | Clostridia   | 0                   | 0                    | 0                  | 0                   |
| <b>seq1029</b> | Firmicutes    | Clostridia   | 0                   | 0                    | 0                  | 0                   |
| <b>seq1718</b> | Firmicutes    | Clostridia   | 0                   | 0                    | 0                  | 0                   |
| <b>seq236</b>  | Firmicutes    | Clostridia   | 109                 | 424                  | 103                | 72                  |
| <b>seq238</b>  | Firmicutes    | Clostridia   | 0                   | 25                   | 66                 | 54                  |
| <b>seq950</b>  | Firmicutes    | Clostridia   | 0                   | 0                    | 106                | 58                  |
| <b>seq48</b>   | Firmicutes    | Clostridia   | 242                 | 73                   | 3415               | 2930                |
| <b>seq404</b>  | Firmicutes    | Clostridia   | 0                   | 0                    | 0                  | 0                   |
| <b>seq898</b>  | Firmicutes    | Clostridia   | 0                   | 0                    | 0                  | 0                   |
| <b>seq914</b>  | Firmicutes    | Clostridia   | 0                   | 0                    | 0                  | 0                   |
| <b>seq1211</b> | Firmicutes    | Clostridia   | 0                   | 0                    | 0                  | 0                   |

Sequence Count Table

|                | <b>Phylum</b> | <b>Class</b> | <b>Subject2WK0</b> | <b>Subject2WK12</b> | <b>Subject3WK0</b> | <b>Subject3WK12</b> |
|----------------|---------------|--------------|--------------------|---------------------|--------------------|---------------------|
| <b>seq813</b>  | Firmicutes    | Clostridia   | 92                 | 167                 | 0                  | 0                   |
| <b>seq870</b>  | Firmicutes    | Clostridia   | 0                  | 0                   | 0                  | 0                   |
| <b>seq933</b>  | Firmicutes    | Clostridia   | 0                  | 0                   | 0                  | 0                   |
| <b>seq953</b>  | Firmicutes    | Clostridia   | 0                  | 0                   | 0                  | 0                   |
| <b>seq956</b>  | Firmicutes    | Clostridia   | 0                  | 0                   | 0                  | 0                   |
| <b>seq997</b>  | Firmicutes    | Clostridia   | 0                  | 0                   | 0                  | 0                   |
| <b>seq1057</b> | Firmicutes    | Clostridia   | 0                  | 0                   | 0                  | 0                   |
| <b>seq1070</b> | Firmicutes    | Clostridia   | 0                  | 0                   | 0                  | 0                   |
| <b>seq1108</b> | Firmicutes    | Clostridia   | 0                  | 0                   | 0                  | 0                   |
| <b>seq1122</b> | Firmicutes    | Clostridia   | 0                  | 0                   | 0                  | 0                   |
| <b>seq1164</b> | Firmicutes    | Clostridia   | 0                  | 0                   | 0                  | 0                   |
| <b>seq1334</b> | Firmicutes    | Clostridia   | 0                  | 0                   | 0                  | 0                   |
| <b>seq1369</b> | Firmicutes    | Clostridia   | 0                  | 0                   | 0                  | 0                   |
| <b>seq1414</b> | Firmicutes    | Clostridia   | 0                  | 0                   | 0                  | 0                   |
| <b>seq1494</b> | Firmicutes    | Clostridia   | 0                  | 0                   | 0                  | 0                   |
| <b>seq1687</b> | Firmicutes    | Clostridia   | 0                  | 0                   | 0                  | 0                   |
| <b>seq63</b>   | Firmicutes    | Clostridia   | 0                  | 0                   | 0                  | 0                   |
| <b>seq78</b>   | Firmicutes    | Clostridia   | 1342               | 700                 | 190                | 365                 |
| <b>seq188</b>  | Firmicutes    | Clostridia   | 0                  | 0                   | 19                 | 31                  |
| <b>seq545</b>  | Firmicutes    | Clostridia   | 0                  | 0                   | 0                  | 0                   |
| <b>seq928</b>  | Firmicutes    | Clostridia   | 0                  | 0                   | 0                  | 0                   |
| <b>seq1027</b> | Firmicutes    | Clostridia   | 0                  | 0                   | 0                  | 0                   |
| <b>seq1029</b> | Firmicutes    | Clostridia   | 0                  | 0                   | 0                  | 0                   |
| <b>seq1718</b> | Firmicutes    | Clostridia   | 0                  | 0                   | 0                  | 0                   |
| <b>seq236</b>  | Firmicutes    | Clostridia   | 0                  | 0                   | 0                  | 0                   |
| <b>seq238</b>  | Firmicutes    | Clostridia   | 147                | 113                 | 0                  | 0                   |
| <b>seq950</b>  | Firmicutes    | Clostridia   | 0                  | 0                   | 0                  | 0                   |
| <b>seq48</b>   | Firmicutes    | Clostridia   | 1254               | 652                 | 439                | 1535                |
| <b>seq404</b>  | Firmicutes    | Clostridia   | 0                  | 0                   | 0                  | 0                   |
| <b>seq898</b>  | Firmicutes    | Clostridia   | 0                  | 0                   | 0                  | 0                   |
| <b>seq914</b>  | Firmicutes    | Clostridia   | 0                  | 0                   | 0                  | 0                   |
| <b>seq1211</b> | Firmicutes    | Clostridia   | 0                  | 0                   | 0                  | 0                   |

Sequence Count Table

|                | <b>Phylum</b> | <b>Class</b> | <b>Subject4WK0</b> | <b>Subject4WK12</b> | <b>Subject5WK0</b> | <b>Subject5WK12</b> |
|----------------|---------------|--------------|--------------------|---------------------|--------------------|---------------------|
| <b>seq813</b>  | Firmicutes    | Clostridia   | 0                  | 0                   | 0                  | 0                   |
| <b>seq870</b>  | Firmicutes    | Clostridia   | 0                  | 0                   | 0                  | 0                   |
| <b>seq933</b>  | Firmicutes    | Clostridia   | 0                  | 112                 | 0                  | 0                   |
| <b>seq953</b>  | Firmicutes    | Clostridia   | 0                  | 162                 | 0                  | 0                   |
| <b>seq956</b>  | Firmicutes    | Clostridia   | 0                  | 0                   | 0                  | 0                   |
| <b>seq997</b>  | Firmicutes    | Clostridia   | 0                  | 0                   | 0                  | 0                   |
| <b>seq1057</b> | Firmicutes    | Clostridia   | 0                  | 0                   | 0                  | 0                   |
| <b>seq1070</b> | Firmicutes    | Clostridia   | 0                  | 0                   | 0                  | 0                   |
| <b>seq1108</b> | Firmicutes    | Clostridia   | 0                  | 0                   | 0                  | 0                   |
| <b>seq1122</b> | Firmicutes    | Clostridia   | 0                  | 0                   | 0                  | 0                   |
| <b>seq1164</b> | Firmicutes    | Clostridia   | 0                  | 0                   | 0                  | 0                   |
| <b>seq1334</b> | Firmicutes    | Clostridia   | 0                  | 0                   | 0                  | 0                   |
| <b>seq1369</b> | Firmicutes    | Clostridia   | 0                  | 0                   | 0                  | 0                   |
| <b>seq1414</b> | Firmicutes    | Clostridia   | 7                  | 0                   | 0                  | 0                   |
| <b>seq1494</b> | Firmicutes    | Clostridia   | 0                  | 0                   | 0                  | 0                   |
| <b>seq1687</b> | Firmicutes    | Clostridia   | 0                  | 0                   | 0                  | 0                   |
| <b>seq63</b>   | Firmicutes    | Clostridia   | 93                 | 388                 | 611                | 0                   |
| <b>seq78</b>   | Firmicutes    | Clostridia   | 254                | 36                  | 0                  | 735                 |
| <b>seq188</b>  | Firmicutes    | Clostridia   | 0                  | 0                   | 0                  | 0                   |
| <b>seq545</b>  | Firmicutes    | Clostridia   | 0                  | 0                   | 0                  | 0                   |
| <b>seq928</b>  | Firmicutes    | Clostridia   | 0                  | 0                   | 0                  | 0                   |
| <b>seq1027</b> | Firmicutes    | Clostridia   | 0                  | 0                   | 0                  | 0                   |
| <b>seq1029</b> | Firmicutes    | Clostridia   | 0                  | 0                   | 0                  | 0                   |
| <b>seq1718</b> | Firmicutes    | Clostridia   | 0                  | 0                   | 0                  | 0                   |
| <b>seq236</b>  | Firmicutes    | Clostridia   | 272                | 163                 | 0                  | 0                   |
| <b>seq238</b>  | Firmicutes    | Clostridia   | 20                 | 0                   | 78                 | 44                  |
| <b>seq950</b>  | Firmicutes    | Clostridia   | 0                  | 0                   | 0                  | 0                   |
| <b>seq48</b>   | Firmicutes    | Clostridia   | 290                | 416                 | 438                | 606                 |
| <b>seq404</b>  | Firmicutes    | Clostridia   | 0                  | 0                   | 0                  | 0                   |
| <b>seq898</b>  | Firmicutes    | Clostridia   | 0                  | 0                   | 0                  | 127                 |
| <b>seq914</b>  | Firmicutes    | Clostridia   | 0                  | 0                   | 0                  | 0                   |
| <b>seq1211</b> | Firmicutes    | Clostridia   | 0                  | 0                   | 0                  | 0                   |

Sequence Count Table

|                | <b>Phylum</b> | <b>Class</b> | <b>Subject6WK0</b> | <b>Subject6WK12</b> | <b>Subject18WK0</b> | <b>Subject18WK12</b> |
|----------------|---------------|--------------|--------------------|---------------------|---------------------|----------------------|
| <b>seq813</b>  | Firmicutes    | Clostridia   | 0                  | 0                   | 0                   | 0                    |
| <b>seq870</b>  | Firmicutes    | Clostridia   | 41                 | 39                  | 0                   | 0                    |
| <b>seq933</b>  | Firmicutes    | Clostridia   | 0                  | 0                   | 0                   | 0                    |
| <b>seq953</b>  | Firmicutes    | Clostridia   | 0                  | 0                   | 0                   | 0                    |
| <b>seq956</b>  | Firmicutes    | Clostridia   | 0                  | 0                   | 0                   | 0                    |
| <b>seq997</b>  | Firmicutes    | Clostridia   | 0                  | 0                   | 0                   | 0                    |
| <b>seq1057</b> | Firmicutes    | Clostridia   | 0                  | 0                   | 0                   | 0                    |
| <b>seq1070</b> | Firmicutes    | Clostridia   | 0                  | 0                   | 0                   | 0                    |
| <b>seq1108</b> | Firmicutes    | Clostridia   | 0                  | 0                   | 0                   | 0                    |
| <b>seq1122</b> | Firmicutes    | Clostridia   | 0                  | 0                   | 0                   | 0                    |
| <b>seq1164</b> | Firmicutes    | Clostridia   | 0                  | 0                   | 0                   | 0                    |
| <b>seq1334</b> | Firmicutes    | Clostridia   | 0                  | 0                   | 0                   | 0                    |
| <b>seq1369</b> | Firmicutes    | Clostridia   | 0                  | 0                   | 0                   | 0                    |
| <b>seq1414</b> | Firmicutes    | Clostridia   | 0                  | 0                   | 0                   | 0                    |
| <b>seq1494</b> | Firmicutes    | Clostridia   | 0                  | 0                   | 0                   | 0                    |
| <b>seq1687</b> | Firmicutes    | Clostridia   | 0                  | 0                   | 0                   | 0                    |
| <b>seq63</b>   | Firmicutes    | Clostridia   | 21                 | 0                   | 1017                | 0                    |
| <b>seq78</b>   | Firmicutes    | Clostridia   | 28                 | 476                 | 589                 | 706                  |
| <b>seq188</b>  | Firmicutes    | Clostridia   | 18                 | 0                   | 0                   | 0                    |
| <b>seq545</b>  | Firmicutes    | Clostridia   | 0                  | 0                   | 0                   | 0                    |
| <b>seq928</b>  | Firmicutes    | Clostridia   | 0                  | 0                   | 0                   | 0                    |
| <b>seq1027</b> | Firmicutes    | Clostridia   | 0                  | 0                   | 0                   | 0                    |
| <b>seq1029</b> | Firmicutes    | Clostridia   | 0                  | 131                 | 0                   | 0                    |
| <b>seq1718</b> | Firmicutes    | Clostridia   | 0                  | 0                   | 0                   | 0                    |
| <b>seq236</b>  | Firmicutes    | Clostridia   | 188                | 170                 | 168                 | 112                  |
| <b>seq238</b>  | Firmicutes    | Clostridia   | 69                 | 69                  | 103                 | 64                   |
| <b>seq950</b>  | Firmicutes    | Clostridia   | 0                  | 0                   | 0                   | 0                    |
| <b>seq48</b>   | Firmicutes    | Clostridia   | 1256               | 1149                | 709                 | 434                  |
| <b>seq404</b>  | Firmicutes    | Clostridia   | 0                  | 92                  | 0                   | 0                    |
| <b>seq898</b>  | Firmicutes    | Clostridia   | 0                  | 72                  | 0                   | 0                    |
| <b>seq914</b>  | Firmicutes    | Clostridia   | 0                  | 0                   | 0                   | 0                    |
| <b>seq1211</b> | Firmicutes    | Clostridia   | 0                  | 0                   | 77                  | 0                    |

Sequence Count Table

|                | <b>Phylum</b> | <b>Class</b> | <b>Subject19WK0</b> | <b>Subject19WK12</b> | <b>Subject20WK0</b> | <b>Subject20WK12</b> |
|----------------|---------------|--------------|---------------------|----------------------|---------------------|----------------------|
| <b>seq813</b>  | Firmicutes    | Clostridia   | 0                   | 0                    | 0                   | 0                    |
| <b>seq870</b>  | Firmicutes    | Clostridia   | 0                   | 0                    | 0                   | 0                    |
| <b>seq933</b>  | Firmicutes    | Clostridia   | 0                   | 0                    | 0                   | 0                    |
| <b>seq953</b>  | Firmicutes    | Clostridia   | 0                   | 0                    | 0                   | 0                    |
| <b>seq956</b>  | Firmicutes    | Clostridia   | 0                   | 0                    | 0                   | 0                    |
| <b>seq997</b>  | Firmicutes    | Clostridia   | 0                   | 0                    | 0                   | 0                    |
| <b>seq1057</b> | Firmicutes    | Clostridia   | 0                   | 0                    | 0                   | 0                    |
| <b>seq1070</b> | Firmicutes    | Clostridia   | 0                   | 0                    | 0                   | 0                    |
| <b>seq1108</b> | Firmicutes    | Clostridia   | 0                   | 0                    | 0                   | 0                    |
| <b>seq1122</b> | Firmicutes    | Clostridia   | 0                   | 0                    | 0                   | 0                    |
| <b>seq1164</b> | Firmicutes    | Clostridia   | 0                   | 0                    | 0                   | 0                    |
| <b>seq1334</b> | Firmicutes    | Clostridia   | 0                   | 0                    | 0                   | 0                    |
| <b>seq1369</b> | Firmicutes    | Clostridia   | 0                   | 0                    | 0                   | 0                    |
| <b>seq1414</b> | Firmicutes    | Clostridia   | 0                   | 0                    | 0                   | 0                    |
| <b>seq1494</b> | Firmicutes    | Clostridia   | 0                   | 0                    | 0                   | 0                    |
| <b>seq1687</b> | Firmicutes    | Clostridia   | 0                   | 0                    | 0                   | 0                    |
| <b>seq63</b>   | Firmicutes    | Clostridia   | 0                   | 0                    | 65                  | 65                   |
| <b>seq78</b>   | Firmicutes    | Clostridia   | 333                 | 31                   | 236                 | 117                  |
| <b>seq188</b>  | Firmicutes    | Clostridia   | 0                   | 0                    | 99                  | 376                  |
| <b>seq545</b>  | Firmicutes    | Clostridia   | 0                   | 0                    | 0                   | 0                    |
| <b>seq928</b>  | Firmicutes    | Clostridia   | 0                   | 0                    | 0                   | 0                    |
| <b>seq1027</b> | Firmicutes    | Clostridia   | 0                   | 0                    | 0                   | 0                    |
| <b>seq1029</b> | Firmicutes    | Clostridia   | 0                   | 0                    | 0                   | 0                    |
| <b>seq1718</b> | Firmicutes    | Clostridia   | 0                   | 0                    | 0                   | 0                    |
| <b>seq236</b>  | Firmicutes    | Clostridia   | 142                 | 297                  | 91                  | 62                   |
| <b>seq238</b>  | Firmicutes    | Clostridia   | 106                 | 108                  | 51                  | 111                  |
| <b>seq950</b>  | Firmicutes    | Clostridia   | 0                   | 0                    | 0                   | 0                    |
| <b>seq48</b>   | Firmicutes    | Clostridia   | 0                   | 0                    | 316                 | 287                  |
| <b>seq404</b>  | Firmicutes    | Clostridia   | 0                   | 0                    | 0                   | 0                    |
| <b>seq898</b>  | Firmicutes    | Clostridia   | 0                   | 0                    | 0                   | 0                    |
| <b>seq914</b>  | Firmicutes    | Clostridia   | 0                   | 0                    | 0                   | 0                    |
| <b>seq1211</b> | Firmicutes    | Clostridia   | 0                   | 0                    | 0                   | 0                    |



Sequence Count Table

|                | <b>Phylum</b> | <b>Class</b> | <b>Subject7WK0</b> | <b>Subject7WK12</b> | <b>Subject21WK0</b> | <b>Subject21WK12</b> |
|----------------|---------------|--------------|--------------------|---------------------|---------------------|----------------------|
| <b>seq813</b>  | Firmicutes    | Clostridia   | 0                  | 0                   | 0                   | 0                    |
| <b>seq870</b>  | Firmicutes    | Clostridia   | 0                  | 0                   | 0                   | 0                    |
| <b>seq933</b>  | Firmicutes    | Clostridia   | 0                  | 0                   | 0                   | 0                    |
| <b>seq953</b>  | Firmicutes    | Clostridia   | 0                  | 0                   | 0                   | 0                    |
| <b>seq956</b>  | Firmicutes    | Clostridia   | 0                  | 0                   | 0                   | 0                    |
| <b>seq997</b>  | Firmicutes    | Clostridia   | 30                 | 15                  | 0                   | 0                    |
| <b>seq1057</b> | Firmicutes    | Clostridia   | 0                  | 0                   | 0                   | 0                    |
| <b>seq1070</b> | Firmicutes    | Clostridia   | 0                  | 0                   | 0                   | 0                    |
| <b>seq1108</b> | Firmicutes    | Clostridia   | 0                  | 0                   | 0                   | 0                    |
| <b>seq1122</b> | Firmicutes    | Clostridia   | 0                  | 0                   | 0                   | 0                    |
| <b>seq1164</b> | Firmicutes    | Clostridia   | 0                  | 0                   | 0                   | 0                    |
| <b>seq1334</b> | Firmicutes    | Clostridia   | 0                  | 0                   | 0                   | 0                    |
| <b>seq1369</b> | Firmicutes    | Clostridia   | 0                  | 0                   | 0                   | 0                    |
| <b>seq1414</b> | Firmicutes    | Clostridia   | 0                  | 0                   | 0                   | 0                    |
| <b>seq1494</b> | Firmicutes    | Clostridia   | 0                  | 0                   | 0                   | 0                    |
| <b>seq1687</b> | Firmicutes    | Clostridia   | 0                  | 0                   | 0                   | 0                    |
| <b>seq63</b>   | Firmicutes    | Clostridia   | 33                 | 696                 | 2551                | 683                  |
| <b>seq78</b>   | Firmicutes    | Clostridia   | 269                | 2691                | 0                   | 0                    |
| <b>seq188</b>  | Firmicutes    | Clostridia   | 0                  | 0                   | 0                   | 0                    |
| <b>seq545</b>  | Firmicutes    | Clostridia   | 0                  | 0                   | 504                 | 142                  |
| <b>seq928</b>  | Firmicutes    | Clostridia   | 0                  | 0                   | 0                   | 0                    |
| <b>seq1027</b> | Firmicutes    | Clostridia   | 0                  | 132                 | 0                   | 0                    |
| <b>seq1029</b> | Firmicutes    | Clostridia   | 0                  | 0                   | 0                   | 0                    |
| <b>seq1718</b> | Firmicutes    | Clostridia   | 0                  | 0                   | 0                   | 0                    |
| <b>seq236</b>  | Firmicutes    | Clostridia   | 0                  | 0                   | 0                   | 0                    |
| <b>seq238</b>  | Firmicutes    | Clostridia   | 213                | 302                 | 0                   | 0                    |
| <b>seq950</b>  | Firmicutes    | Clostridia   | 0                  | 0                   | 0                   | 0                    |
| <b>seq48</b>   | Firmicutes    | Clostridia   | 885                | 1104                | 0                   | 0                    |
| <b>seq404</b>  | Firmicutes    | Clostridia   | 114                | 165                 | 0                   | 0                    |
| <b>seq898</b>  | Firmicutes    | Clostridia   | 0                  | 0                   | 0                   | 0                    |
| <b>seq914</b>  | Firmicutes    | Clostridia   | 0                  | 0                   | 0                   | 0                    |
| <b>seq1211</b> | Firmicutes    | Clostridia   | 0                  | 0                   | 0                   | 0                    |

Sequence Count Table

|                | <b>Phylum</b> | <b>Class</b> | <b>Subject8WK0</b> | <b>Subject8WK12</b> | <b>Subject9WK0</b> | <b>Subject9WK12</b> |
|----------------|---------------|--------------|--------------------|---------------------|--------------------|---------------------|
| <b>seq813</b>  | Firmicutes    | Clostridia   | 0                  | 0                   | 0                  | 0                   |
| <b>seq870</b>  | Firmicutes    | Clostridia   | 0                  | 0                   | 0                  | 0                   |
| <b>seq933</b>  | Firmicutes    | Clostridia   | 0                  | 0                   | 0                  | 0                   |
| <b>seq953</b>  | Firmicutes    | Clostridia   | 0                  | 0                   | 0                  | 0                   |
| <b>seq956</b>  | Firmicutes    | Clostridia   | 0                  | 0                   | 0                  | 0                   |
| <b>seq997</b>  | Firmicutes    | Clostridia   | 0                  | 0                   | 60                 | 22                  |
| <b>seq1057</b> | Firmicutes    | Clostridia   | 0                  | 0                   | 0                  | 0                   |
| <b>seq1070</b> | Firmicutes    | Clostridia   | 0                  | 0                   | 0                  | 0                   |
| <b>seq1108</b> | Firmicutes    | Clostridia   | 0                  | 0                   | 0                  | 0                   |
| <b>seq1122</b> | Firmicutes    | Clostridia   | 48                 | 24                  | 0                  | 0                   |
| <b>seq1164</b> | Firmicutes    | Clostridia   | 0                  | 0                   | 0                  | 0                   |
| <b>seq1334</b> | Firmicutes    | Clostridia   | 0                  | 0                   | 0                  | 0                   |
| <b>seq1369</b> | Firmicutes    | Clostridia   | 0                  | 0                   | 0                  | 0                   |
| <b>seq1414</b> | Firmicutes    | Clostridia   | 0                  | 0                   | 0                  | 0                   |
| <b>seq1494</b> | Firmicutes    | Clostridia   | 0                  | 0                   | 0                  | 0                   |
| <b>seq1687</b> | Firmicutes    | Clostridia   | 0                  | 0                   | 0                  | 0                   |
| <b>seq63</b>   | Firmicutes    | Clostridia   | 1547               | 248                 | 44                 | 20                  |
| <b>seq78</b>   | Firmicutes    | Clostridia   | 0                  | 0                   | 213                | 59                  |
| <b>seq188</b>  | Firmicutes    | Clostridia   | 0                  | 0                   | 0                  | 0                   |
| <b>seq545</b>  | Firmicutes    | Clostridia   | 0                  | 0                   | 0                  | 0                   |
| <b>seq928</b>  | Firmicutes    | Clostridia   | 0                  | 0                   | 0                  | 0                   |
| <b>seq1027</b> | Firmicutes    | Clostridia   | 0                  | 0                   | 0                  | 0                   |
| <b>seq1029</b> | Firmicutes    | Clostridia   | 0                  | 0                   | 0                  | 0                   |
| <b>seq1718</b> | Firmicutes    | Clostridia   | 0                  | 0                   | 0                  | 0                   |
| <b>seq236</b>  | Firmicutes    | Clostridia   | 109                | 184                 | 0                  | 0                   |
| <b>seq238</b>  | Firmicutes    | Clostridia   | 68                 | 28                  | 0                  | 0                   |
| <b>seq950</b>  | Firmicutes    | Clostridia   | 0                  | 0                   | 0                  | 0                   |
| <b>seq48</b>   | Firmicutes    | Clostridia   | 635                | 471                 | 0                  | 0                   |
| <b>seq404</b>  | Firmicutes    | Clostridia   | 0                  | 0                   | 0                  | 0                   |
| <b>seq898</b>  | Firmicutes    | Clostridia   | 0                  | 0                   | 0                  | 0                   |
| <b>seq914</b>  | Firmicutes    | Clostridia   | 0                  | 0                   | 0                  | 0                   |
| <b>seq1211</b> | Firmicutes    | Clostridia   | 0                  | 0                   | 0                  | 0                   |

Sequence Count Table

|                | <b>Phylum</b> | <b>Class</b> | <b>Subject10WK0</b> | <b>Subject10WK12</b> | <b>Subject22WK0</b> | <b>Subject22WK12</b> |
|----------------|---------------|--------------|---------------------|----------------------|---------------------|----------------------|
| <b>seq813</b>  | Firmicutes    | Clostridia   | 0                   | 0                    | 0                   | 0                    |
| <b>seq870</b>  | Firmicutes    | Clostridia   | 0                   | 0                    | 81                  | 39                   |
| <b>seq933</b>  | Firmicutes    | Clostridia   | 0                   | 0                    | 0                   | 0                    |
| <b>seq953</b>  | Firmicutes    | Clostridia   | 0                   | 0                    | 0                   | 0                    |
| <b>seq956</b>  | Firmicutes    | Clostridia   | 0                   | 0                    | 101                 | 60                   |
| <b>seq997</b>  | Firmicutes    | Clostridia   | 0                   | 0                    | 0                   | 0                    |
| <b>seq1057</b> | Firmicutes    | Clostridia   | 0                   | 0                    | 0                   | 0                    |
| <b>seq1070</b> | Firmicutes    | Clostridia   | 0                   | 0                    | 0                   | 0                    |
| <b>seq1108</b> | Firmicutes    | Clostridia   | 0                   | 0                    | 0                   | 0                    |
| <b>seq1122</b> | Firmicutes    | Clostridia   | 0                   | 0                    | 0                   | 0                    |
| <b>seq1164</b> | Firmicutes    | Clostridia   | 0                   | 0                    | 0                   | 0                    |
| <b>seq1334</b> | Firmicutes    | Clostridia   | 0                   | 0                    | 0                   | 0                    |
| <b>seq1369</b> | Firmicutes    | Clostridia   | 0                   | 0                    | 0                   | 0                    |
| <b>seq1414</b> | Firmicutes    | Clostridia   | 0                   | 0                    | 21                  | 11                   |
| <b>seq1494</b> | Firmicutes    | Clostridia   | 0                   | 0                    | 0                   | 0                    |
| <b>seq1687</b> | Firmicutes    | Clostridia   | 0                   | 0                    | 0                   | 0                    |
| <b>seq63</b>   | Firmicutes    | Clostridia   | 247                 | 378                  | 58                  | 37                   |
| <b>seq78</b>   | Firmicutes    | Clostridia   | 0                   | 0                    | 487                 | 338                  |
| <b>seq188</b>  | Firmicutes    | Clostridia   | 0                   | 0                    | 0                   | 0                    |
| <b>seq545</b>  | Firmicutes    | Clostridia   | 0                   | 0                    | 0                   | 0                    |
| <b>seq928</b>  | Firmicutes    | Clostridia   | 0                   | 0                    | 0                   | 0                    |
| <b>seq1027</b> | Firmicutes    | Clostridia   | 0                   | 0                    | 0                   | 0                    |
| <b>seq1029</b> | Firmicutes    | Clostridia   | 0                   | 0                    | 0                   | 0                    |
| <b>seq1718</b> | Firmicutes    | Clostridia   | 0                   | 0                    | 0                   | 0                    |
| <b>seq236</b>  | Firmicutes    | Clostridia   | 0                   | 0                    | 191                 | 155                  |
| <b>seq238</b>  | Firmicutes    | Clostridia   | 0                   | 0                    | 172                 | 117                  |
| <b>seq950</b>  | Firmicutes    | Clostridia   | 0                   | 0                    | 0                   | 0                    |
| <b>seq48</b>   | Firmicutes    | Clostridia   | 0                   | 0                    | 427                 | 496                  |
| <b>seq404</b>  | Firmicutes    | Clostridia   | 0                   | 0                    | 0                   | 0                    |
| <b>seq898</b>  | Firmicutes    | Clostridia   | 0                   | 0                    | 0                   | 0                    |
| <b>seq914</b>  | Firmicutes    | Clostridia   | 0                   | 0                    | 0                   | 0                    |
| <b>seq1211</b> | Firmicutes    | Clostridia   | 0                   | 0                    | 0                   | 0                    |

Sequence Count Table

|                | <b>Phylum</b> | <b>Class</b> | <b>Subject23WK0</b> | <b>Subject23WK12</b> | <b>Subject24WK0</b> | <b>Subject24WK12</b> |
|----------------|---------------|--------------|---------------------|----------------------|---------------------|----------------------|
| <b>seq813</b>  | Firmicutes    | Clostridia   | 0                   | 0                    | 0                   | 0                    |
| <b>seq870</b>  | Firmicutes    | Clostridia   | 0                   | 0                    | 0                   | 0                    |
| <b>seq933</b>  | Firmicutes    | Clostridia   | 0                   | 0                    | 0                   | 0                    |
| <b>seq953</b>  | Firmicutes    | Clostridia   | 0                   | 0                    | 0                   | 0                    |
| <b>seq956</b>  | Firmicutes    | Clostridia   | 0                   | 0                    | 0                   | 0                    |
| <b>seq997</b>  | Firmicutes    | Clostridia   | 0                   | 0                    | 0                   | 0                    |
| <b>seq1057</b> | Firmicutes    | Clostridia   | 0                   | 0                    | 0                   | 0                    |
| <b>seq1070</b> | Firmicutes    | Clostridia   | 0                   | 0                    | 0                   | 0                    |
| <b>seq1108</b> | Firmicutes    | Clostridia   | 0                   | 0                    | 0                   | 0                    |
| <b>seq1122</b> | Firmicutes    | Clostridia   | 0                   | 0                    | 0                   | 0                    |
| <b>seq1164</b> | Firmicutes    | Clostridia   | 0                   | 0                    | 0                   | 0                    |
| <b>seq1334</b> | Firmicutes    | Clostridia   | 0                   | 0                    | 0                   | 0                    |
| <b>seq1369</b> | Firmicutes    | Clostridia   | 0                   | 0                    | 0                   | 0                    |
| <b>seq1414</b> | Firmicutes    | Clostridia   | 0                   | 0                    | 0                   | 0                    |
| <b>seq1494</b> | Firmicutes    | Clostridia   | 0                   | 0                    | 0                   | 0                    |
| <b>seq1687</b> | Firmicutes    | Clostridia   | 0                   | 0                    | 0                   | 0                    |
| <b>seq63</b>   | Firmicutes    | Clostridia   | 717                 | 1303                 | 1069                | 416                  |
| <b>seq78</b>   | Firmicutes    | Clostridia   | 12                  | 63                   | 912                 | 365                  |
| <b>seq188</b>  | Firmicutes    | Clostridia   | 82                  | 237                  | 740                 | 169                  |
| <b>seq545</b>  | Firmicutes    | Clostridia   | 0                   | 0                    | 0                   | 0                    |
| <b>seq928</b>  | Firmicutes    | Clostridia   | 0                   | 0                    | 0                   | 0                    |
| <b>seq1027</b> | Firmicutes    | Clostridia   | 0                   | 0                    | 0                   | 0                    |
| <b>seq1029</b> | Firmicutes    | Clostridia   | 0                   | 0                    | 0                   | 0                    |
| <b>seq1718</b> | Firmicutes    | Clostridia   | 0                   | 0                    | 0                   | 0                    |
| <b>seq236</b>  | Firmicutes    | Clostridia   | 78                  | 77                   | 0                   | 0                    |
| <b>seq238</b>  | Firmicutes    | Clostridia   | 60                  | 92                   | 268                 | 156                  |
| <b>seq950</b>  | Firmicutes    | Clostridia   | 0                   | 0                    | 0                   | 0                    |
| <b>seq48</b>   | Firmicutes    | Clostridia   | 1554                | 2093                 | 1211                | 1483                 |
| <b>seq404</b>  | Firmicutes    | Clostridia   | 0                   | 0                    | 0                   | 0                    |
| <b>seq898</b>  | Firmicutes    | Clostridia   | 0                   | 0                    | 0                   | 0                    |
| <b>seq914</b>  | Firmicutes    | Clostridia   | 0                   | 0                    | 0                   | 0                    |
| <b>seq1211</b> | Firmicutes    | Clostridia   | 0                   | 0                    | 0                   | 0                    |

Sequence Count Table

|                | <b>Phylum</b> | <b>Class</b> | <b>Subject11WK0</b> | <b>Subject11WK12</b> | <b>Subject12WK0</b> | <b>Subject12WK12</b> |
|----------------|---------------|--------------|---------------------|----------------------|---------------------|----------------------|
| <b>seq813</b>  | Firmicutes    | Clostridia   | 0                   | 0                    | 0                   | 0                    |
| <b>seq870</b>  | Firmicutes    | Clostridia   | 0                   | 0                    | 0                   | 0                    |
| <b>seq933</b>  | Firmicutes    | Clostridia   | 0                   | 0                    | 0                   | 0                    |
| <b>seq953</b>  | Firmicutes    | Clostridia   | 0                   | 0                    | 0                   | 0                    |
| <b>seq956</b>  | Firmicutes    | Clostridia   | 0                   | 0                    | 0                   | 0                    |
| <b>seq997</b>  | Firmicutes    | Clostridia   | 0                   | 0                    | 0                   | 0                    |
| <b>seq1057</b> | Firmicutes    | Clostridia   | 0                   | 0                    | 0                   | 0                    |
| <b>seq1070</b> | Firmicutes    | Clostridia   | 0                   | 0                    | 0                   | 0                    |
| <b>seq1108</b> | Firmicutes    | Clostridia   | 0                   | 0                    | 0                   | 0                    |
| <b>seq1122</b> | Firmicutes    | Clostridia   | 0                   | 0                    | 0                   | 14                   |
| <b>seq1164</b> | Firmicutes    | Clostridia   | 0                   | 0                    | 0                   | 0                    |
| <b>seq1334</b> | Firmicutes    | Clostridia   | 0                   | 51                   | 0                   | 0                    |
| <b>seq1369</b> | Firmicutes    | Clostridia   | 0                   | 0                    | 0                   | 0                    |
| <b>seq1414</b> | Firmicutes    | Clostridia   | 0                   | 0                    | 0                   | 0                    |
| <b>seq1494</b> | Firmicutes    | Clostridia   | 29                  | 0                    | 0                   | 0                    |
| <b>seq1687</b> | Firmicutes    | Clostridia   | 0                   | 0                    | 0                   | 0                    |
| <b>seq63</b>   | Firmicutes    | Clostridia   | 502                 | 821                  | 1706                | 1487                 |
| <b>seq78</b>   | Firmicutes    | Clostridia   | 0                   | 0                    | 610                 | 198                  |
| <b>seq188</b>  | Firmicutes    | Clostridia   | 0                   | 0                    | 334                 | 33                   |
| <b>seq545</b>  | Firmicutes    | Clostridia   | 0                   | 0                    | 0                   | 0                    |
| <b>seq928</b>  | Firmicutes    | Clostridia   | 0                   | 0                    | 0                   | 0                    |
| <b>seq1027</b> | Firmicutes    | Clostridia   | 0                   | 0                    | 0                   | 0                    |
| <b>seq1029</b> | Firmicutes    | Clostridia   | 0                   | 0                    | 0                   | 0                    |
| <b>seq1718</b> | Firmicutes    | Clostridia   | 0                   | 0                    | 0                   | 0                    |
| <b>seq236</b>  | Firmicutes    | Clostridia   | 0                   | 0                    | 51                  | 33                   |
| <b>seq238</b>  | Firmicutes    | Clostridia   | 0                   | 0                    | 128                 | 68                   |
| <b>seq950</b>  | Firmicutes    | Clostridia   | 0                   | 0                    | 0                   | 0                    |
| <b>seq48</b>   | Firmicutes    | Clostridia   | 0                   | 0                    | 495                 | 761                  |
| <b>seq404</b>  | Firmicutes    | Clostridia   | 0                   | 0                    | 0                   | 0                    |
| <b>seq898</b>  | Firmicutes    | Clostridia   | 0                   | 0                    | 0                   | 0                    |
| <b>seq914</b>  | Firmicutes    | Clostridia   | 0                   | 0                    | 0                   | 0                    |
| <b>seq1211</b> | Firmicutes    | Clostridia   | 0                   | 0                    | 0                   | 0                    |

Sequence Count Table

|                | <b>Phylum</b> | <b>Class</b> | <b>Subject25WK0</b> | <b>Subject25WK12</b> | <b>Subject38WK0</b> | <b>Subject38WK12</b> |
|----------------|---------------|--------------|---------------------|----------------------|---------------------|----------------------|
| <b>seq813</b>  | Firmicutes    | Clostridia   | 0                   | 0                    | 0                   | 0                    |
| <b>seq870</b>  | Firmicutes    | Clostridia   | 0                   | 0                    | 0                   | 0                    |
| <b>seq933</b>  | Firmicutes    | Clostridia   | 0                   | 0                    | 0                   | 0                    |
| <b>seq953</b>  | Firmicutes    | Clostridia   | 0                   | 0                    | 0                   | 0                    |
| <b>seq956</b>  | Firmicutes    | Clostridia   | 0                   | 0                    | 0                   | 0                    |
| <b>seq997</b>  | Firmicutes    | Clostridia   | 17                  | 0                    | 0                   | 0                    |
| <b>seq1057</b> | Firmicutes    | Clostridia   | 0                   | 0                    | 0                   | 0                    |
| <b>seq1070</b> | Firmicutes    | Clostridia   | 0                   | 0                    | 0                   | 0                    |
| <b>seq1108</b> | Firmicutes    | Clostridia   | 0                   | 0                    | 0                   | 0                    |
| <b>seq1122</b> | Firmicutes    | Clostridia   | 0                   | 0                    | 0                   | 0                    |
| <b>seq1164</b> | Firmicutes    | Clostridia   | 0                   | 0                    | 0                   | 0                    |
| <b>seq1334</b> | Firmicutes    | Clostridia   | 0                   | 0                    | 0                   | 0                    |
| <b>seq1369</b> | Firmicutes    | Clostridia   | 0                   | 0                    | 0                   | 0                    |
| <b>seq1414</b> | Firmicutes    | Clostridia   | 0                   | 0                    | 0                   | 0                    |
| <b>seq1494</b> | Firmicutes    | Clostridia   | 0                   | 0                    | 0                   | 0                    |
| <b>seq1687</b> | Firmicutes    | Clostridia   | 0                   | 0                    | 0                   | 0                    |
| <b>seq63</b>   | Firmicutes    | Clostridia   | 182                 | 10                   | 0                   | 0                    |
| <b>seq78</b>   | Firmicutes    | Clostridia   | 26                  | 0                    | 0                   | 0                    |
| <b>seq188</b>  | Firmicutes    | Clostridia   | 0                   | 0                    | 0                   | 0                    |
| <b>seq545</b>  | Firmicutes    | Clostridia   | 0                   | 0                    | 0                   | 0                    |
| <b>seq928</b>  | Firmicutes    | Clostridia   | 0                   | 0                    | 0                   | 0                    |
| <b>seq1027</b> | Firmicutes    | Clostridia   | 0                   | 0                    | 0                   | 0                    |
| <b>seq1029</b> | Firmicutes    | Clostridia   | 0                   | 0                    | 0                   | 0                    |
| <b>seq1718</b> | Firmicutes    | Clostridia   | 0                   | 12                   | 0                   | 0                    |
| <b>seq236</b>  | Firmicutes    | Clostridia   | 0                   | 0                    | 0                   | 0                    |
| <b>seq238</b>  | Firmicutes    | Clostridia   | 163                 | 26                   | 0                   | 0                    |
| <b>seq950</b>  | Firmicutes    | Clostridia   | 0                   | 0                    | 0                   | 0                    |
| <b>seq48</b>   | Firmicutes    | Clostridia   | 65                  | 0                    | 0                   | 0                    |
| <b>seq404</b>  | Firmicutes    | Clostridia   | 0                   | 0                    | 0                   | 0                    |
| <b>seq898</b>  | Firmicutes    | Clostridia   | 0                   | 0                    | 0                   | 0                    |
| <b>seq914</b>  | Firmicutes    | Clostridia   | 0                   | 0                    | 0                   | 0                    |
| <b>seq1211</b> | Firmicutes    | Clostridia   | 0                   | 0                    | 0                   | 0                    |

Sequence Count Table

|                | <b>Phylum</b> | <b>Class</b> | <b>Subject31WK0</b> | <b>Subject31WK12</b> | <b>Subject32WK0</b> | <b>Subject32WK12</b> |
|----------------|---------------|--------------|---------------------|----------------------|---------------------|----------------------|
| <b>seq813</b>  | Firmicutes    | Clostridia   | 0                   | 0                    | 0                   | 0                    |
| <b>seq870</b>  | Firmicutes    | Clostridia   | 0                   | 0                    | 0                   | 0                    |
| <b>seq933</b>  | Firmicutes    | Clostridia   | 0                   | 0                    | 0                   | 0                    |
| <b>seq953</b>  | Firmicutes    | Clostridia   | 0                   | 0                    | 0                   | 0                    |
| <b>seq956</b>  | Firmicutes    | Clostridia   | 0                   | 0                    | 0                   | 0                    |
| <b>seq997</b>  | Firmicutes    | Clostridia   | 0                   | 0                    | 0                   | 0                    |
| <b>seq1057</b> | Firmicutes    | Clostridia   | 0                   | 0                    | 122                 | 0                    |
| <b>seq1070</b> | Firmicutes    | Clostridia   | 0                   | 0                    | 0                   | 0                    |
| <b>seq1108</b> | Firmicutes    | Clostridia   | 0                   | 0                    | 0                   | 0                    |
| <b>seq1122</b> | Firmicutes    | Clostridia   | 0                   | 0                    | 0                   | 0                    |
| <b>seq1164</b> | Firmicutes    | Clostridia   | 0                   | 0                    | 0                   | 0                    |
| <b>seq1334</b> | Firmicutes    | Clostridia   | 0                   | 0                    | 0                   | 0                    |
| <b>seq1369</b> | Firmicutes    | Clostridia   | 0                   | 0                    | 0                   | 0                    |
| <b>seq1414</b> | Firmicutes    | Clostridia   | 0                   | 0                    | 0                   | 0                    |
| <b>seq1494</b> | Firmicutes    | Clostridia   | 0                   | 0                    | 0                   | 0                    |
| <b>seq1687</b> | Firmicutes    | Clostridia   | 0                   | 0                    | 0                   | 0                    |
| <b>seq63</b>   | Firmicutes    | Clostridia   | 0                   | 0                    | 0                   | 0                    |
| <b>seq78</b>   | Firmicutes    | Clostridia   | 0                   | 0                    | 812                 | 0                    |
| <b>seq188</b>  | Firmicutes    | Clostridia   | 0                   | 0                    | 24                  | 0                    |
| <b>seq545</b>  | Firmicutes    | Clostridia   | 0                   | 0                    | 0                   | 0                    |
| <b>seq928</b>  | Firmicutes    | Clostridia   | 0                   | 0                    | 0                   | 0                    |
| <b>seq1027</b> | Firmicutes    | Clostridia   | 0                   | 0                    | 0                   | 0                    |
| <b>seq1029</b> | Firmicutes    | Clostridia   | 0                   | 0                    | 0                   | 0                    |
| <b>seq1718</b> | Firmicutes    | Clostridia   | 0                   | 0                    | 0                   | 0                    |
| <b>seq236</b>  | Firmicutes    | Clostridia   | 0                   | 0                    | 89                  | 0                    |
| <b>seq238</b>  | Firmicutes    | Clostridia   | 0                   | 0                    | 0                   | 0                    |
| <b>seq950</b>  | Firmicutes    | Clostridia   | 0                   | 0                    | 0                   | 0                    |
| <b>seq48</b>   | Firmicutes    | Clostridia   | 0                   | 0                    | 219                 | 0                    |
| <b>seq404</b>  | Firmicutes    | Clostridia   | 0                   | 0                    | 0                   | 0                    |
| <b>seq898</b>  | Firmicutes    | Clostridia   | 0                   | 0                    | 0                   | 0                    |
| <b>seq914</b>  | Firmicutes    | Clostridia   | 0                   | 0                    | 0                   | 0                    |
| <b>seq1211</b> | Firmicutes    | Clostridia   | 0                   | 0                    | 0                   | 0                    |

Sequence Count Table

|                | <b>Phylum</b> | <b>Class</b> | <b>Subject13WK0</b> | <b>Subject13WK12</b> | <b>Subject39WK0</b> | <b>Subject39WK12</b> |
|----------------|---------------|--------------|---------------------|----------------------|---------------------|----------------------|
| <b>seq813</b>  | Firmicutes    | Clostridia   | 0                   | 0                    | 0                   | 0                    |
| <b>seq870</b>  | Firmicutes    | Clostridia   | 0                   | 14                   | 0                   | 0                    |
| <b>seq933</b>  | Firmicutes    | Clostridia   | 0                   | 0                    | 0                   | 0                    |
| <b>seq953</b>  | Firmicutes    | Clostridia   | 0                   | 0                    | 0                   | 0                    |
| <b>seq956</b>  | Firmicutes    | Clostridia   | 0                   | 0                    | 0                   | 0                    |
| <b>seq997</b>  | Firmicutes    | Clostridia   | 0                   | 0                    | 0                   | 0                    |
| <b>seq1057</b> | Firmicutes    | Clostridia   | 0                   | 0                    | 0                   | 0                    |
| <b>seq1070</b> | Firmicutes    | Clostridia   | 0                   | 0                    | 0                   | 0                    |
| <b>seq1108</b> | Firmicutes    | Clostridia   | 0                   | 0                    | 0                   | 0                    |
| <b>seq1122</b> | Firmicutes    | Clostridia   | 0                   | 0                    | 0                   | 0                    |
| <b>seq1164</b> | Firmicutes    | Clostridia   | 0                   | 0                    | 0                   | 90                   |
| <b>seq1334</b> | Firmicutes    | Clostridia   | 0                   | 0                    | 0                   | 0                    |
| <b>seq1369</b> | Firmicutes    | Clostridia   | 0                   | 0                    | 0                   | 0                    |
| <b>seq1414</b> | Firmicutes    | Clostridia   | 0                   | 0                    | 0                   | 0                    |
| <b>seq1494</b> | Firmicutes    | Clostridia   | 0                   | 0                    | 0                   | 0                    |
| <b>seq1687</b> | Firmicutes    | Clostridia   | 0                   | 0                    | 0                   | 0                    |
| <b>seq63</b>   | Firmicutes    | Clostridia   | 181                 | 0                    | 0                   | 0                    |
| <b>seq78</b>   | Firmicutes    | Clostridia   | 274                 | 0                    | 0                   | 267                  |
| <b>seq188</b>  | Firmicutes    | Clostridia   | 426                 | 908                  | 0                   | 0                    |
| <b>seq545</b>  | Firmicutes    | Clostridia   | 0                   | 0                    | 0                   | 0                    |
| <b>seq928</b>  | Firmicutes    | Clostridia   | 0                   | 0                    | 0                   | 0                    |
| <b>seq1027</b> | Firmicutes    | Clostridia   | 0                   | 0                    | 0                   | 0                    |
| <b>seq1029</b> | Firmicutes    | Clostridia   | 0                   | 0                    | 0                   | 0                    |
| <b>seq1718</b> | Firmicutes    | Clostridia   | 0                   | 0                    | 0                   | 0                    |
| <b>seq236</b>  | Firmicutes    | Clostridia   | 0                   | 0                    | 0                   | 21                   |
| <b>seq238</b>  | Firmicutes    | Clostridia   | 0                   | 0                    | 0                   | 47                   |
| <b>seq950</b>  | Firmicutes    | Clostridia   | 0                   | 0                    | 0                   | 0                    |
| <b>seq48</b>   | Firmicutes    | Clostridia   | 834                 | 563                  | 0                   | 438                  |
| <b>seq404</b>  | Firmicutes    | Clostridia   | 0                   | 0                    | 0                   | 0                    |
| <b>seq898</b>  | Firmicutes    | Clostridia   | 0                   | 0                    | 0                   | 0                    |
| <b>seq914</b>  | Firmicutes    | Clostridia   | 120                 | 67                   | 0                   | 0                    |
| <b>seq1211</b> | Firmicutes    | Clostridia   | 0                   | 0                    | 0                   | 0                    |



Sequence Count Table

|                | <b>Phylum</b> | <b>Class</b> | <b>Subject26WK0</b> | <b>Subject26WK12</b> | <b>Subject14WK0</b> | <b>Subject14WK12</b> |
|----------------|---------------|--------------|---------------------|----------------------|---------------------|----------------------|
| <b>seq813</b>  | Firmicutes    | Clostridia   | 0                   | 0                    | 0                   | 0                    |
| <b>seq870</b>  | Firmicutes    | Clostridia   | 0                   | 0                    | 0                   | 0                    |
| <b>seq933</b>  | Firmicutes    | Clostridia   | 0                   | 63                   | 0                   | 0                    |
| <b>seq953</b>  | Firmicutes    | Clostridia   | 0                   | 0                    | 0                   | 0                    |
| <b>seq956</b>  | Firmicutes    | Clostridia   | 0                   | 0                    | 0                   | 0                    |
| <b>seq997</b>  | Firmicutes    | Clostridia   | 0                   | 0                    | 0                   | 0                    |
| <b>seq1057</b> | Firmicutes    | Clostridia   | 0                   | 0                    | 0                   | 0                    |
| <b>seq1070</b> | Firmicutes    | Clostridia   | 0                   | 0                    | 0                   | 0                    |
| <b>seq1108</b> | Firmicutes    | Clostridia   | 0                   | 0                    | 0                   | 0                    |
| <b>seq1122</b> | Firmicutes    | Clostridia   | 0                   | 0                    | 0                   | 0                    |
| <b>seq1164</b> | Firmicutes    | Clostridia   | 0                   | 0                    | 0                   | 0                    |
| <b>seq1334</b> | Firmicutes    | Clostridia   | 0                   | 0                    | 0                   | 0                    |
| <b>seq1369</b> | Firmicutes    | Clostridia   | 0                   | 0                    | 0                   | 0                    |
| <b>seq1414</b> | Firmicutes    | Clostridia   | 0                   | 0                    | 0                   | 0                    |
| <b>seq1494</b> | Firmicutes    | Clostridia   | 0                   | 0                    | 0                   | 0                    |
| <b>seq1687</b> | Firmicutes    | Clostridia   | 0                   | 0                    | 0                   | 0                    |
| <b>seq63</b>   | Firmicutes    | Clostridia   | 90                  | 1083                 | 625                 | 115                  |
| <b>seq78</b>   | Firmicutes    | Clostridia   | 0                   | 0                    | 1222                | 484                  |
| <b>seq188</b>  | Firmicutes    | Clostridia   | 0                   | 0                    | 0                   | 0                    |
| <b>seq545</b>  | Firmicutes    | Clostridia   | 0                   | 0                    | 0                   | 0                    |
| <b>seq928</b>  | Firmicutes    | Clostridia   | 0                   | 178                  | 0                   | 0                    |
| <b>seq1027</b> | Firmicutes    | Clostridia   | 0                   | 0                    | 0                   | 0                    |
| <b>seq1029</b> | Firmicutes    | Clostridia   | 0                   | 0                    | 0                   | 0                    |
| <b>seq1718</b> | Firmicutes    | Clostridia   | 0                   | 0                    | 0                   | 0                    |
| <b>seq236</b>  | Firmicutes    | Clostridia   | 0                   | 0                    | 54                  | 37                   |
| <b>seq238</b>  | Firmicutes    | Clostridia   | 0                   | 0                    | 108                 | 103                  |
| <b>seq950</b>  | Firmicutes    | Clostridia   | 0                   | 0                    | 0                   | 0                    |
| <b>seq48</b>   | Firmicutes    | Clostridia   | 0                   | 0                    | 646                 | 728                  |
| <b>seq404</b>  | Firmicutes    | Clostridia   | 0                   | 0                    | 385                 | 475                  |
| <b>seq898</b>  | Firmicutes    | Clostridia   | 0                   | 0                    | 0                   | 0                    |
| <b>seq914</b>  | Firmicutes    | Clostridia   | 0                   | 0                    | 0                   | 0                    |
| <b>seq1211</b> | Firmicutes    | Clostridia   | 0                   | 0                    | 0                   | 0                    |

Sequence Count Table

|                | <b>Phylum</b> | <b>Class</b> | <b>Subject27WK0</b> | <b>Subject27WK12</b> | <b>Subject15WK0</b> | <b>Subject15WK12</b> |
|----------------|---------------|--------------|---------------------|----------------------|---------------------|----------------------|
| <b>seq813</b>  | Firmicutes    | Clostridia   | 0                   | 0                    | 0                   | 0                    |
| <b>seq870</b>  | Firmicutes    | Clostridia   | 0                   | 0                    | 0                   | 0                    |
| <b>seq933</b>  | Firmicutes    | Clostridia   | 0                   | 0                    | 0                   | 0                    |
| <b>seq953</b>  | Firmicutes    | Clostridia   | 0                   | 0                    | 0                   | 0                    |
| <b>seq956</b>  | Firmicutes    | Clostridia   | 0                   | 0                    | 0                   | 0                    |
| <b>seq997</b>  | Firmicutes    | Clostridia   | 0                   | 0                    | 0                   | 0                    |
| <b>seq1057</b> | Firmicutes    | Clostridia   | 0                   | 0                    | 0                   | 0                    |
| <b>seq1070</b> | Firmicutes    | Clostridia   | 0                   | 0                    | 0                   | 0                    |
| <b>seq1108</b> | Firmicutes    | Clostridia   | 104                 | 0                    | 0                   | 0                    |
| <b>seq1122</b> | Firmicutes    | Clostridia   | 0                   | 0                    | 0                   | 0                    |
| <b>seq1164</b> | Firmicutes    | Clostridia   | 0                   | 0                    | 0                   | 0                    |
| <b>seq1334</b> | Firmicutes    | Clostridia   | 0                   | 0                    | 0                   | 0                    |
| <b>seq1369</b> | Firmicutes    | Clostridia   | 0                   | 0                    | 46                  | 0                    |
| <b>seq1414</b> | Firmicutes    | Clostridia   | 0                   | 0                    | 0                   | 0                    |
| <b>seq1494</b> | Firmicutes    | Clostridia   | 0                   | 0                    | 0                   | 0                    |
| <b>seq1687</b> | Firmicutes    | Clostridia   | 0                   | 0                    | 0                   | 0                    |
| <b>seq63</b>   | Firmicutes    | Clostridia   | 0                   | 752                  | 283                 | 59                   |
| <b>seq78</b>   | Firmicutes    | Clostridia   | 442                 | 0                    | 664                 | 847                  |
| <b>seq188</b>  | Firmicutes    | Clostridia   | 0                   | 155                  | 0                   | 0                    |
| <b>seq545</b>  | Firmicutes    | Clostridia   | 0                   | 0                    | 0                   | 0                    |
| <b>seq928</b>  | Firmicutes    | Clostridia   | 0                   | 0                    | 0                   | 0                    |
| <b>seq1027</b> | Firmicutes    | Clostridia   | 0                   | 0                    | 0                   | 0                    |
| <b>seq1029</b> | Firmicutes    | Clostridia   | 0                   | 0                    | 0                   | 0                    |
| <b>seq1718</b> | Firmicutes    | Clostridia   | 0                   | 0                    | 0                   | 0                    |
| <b>seq236</b>  | Firmicutes    | Clostridia   | 47                  | 105                  | 0                   | 0                    |
| <b>seq238</b>  | Firmicutes    | Clostridia   | 45                  | 58                   | 69                  | 53                   |
| <b>seq950</b>  | Firmicutes    | Clostridia   | 0                   | 0                    | 0                   | 0                    |
| <b>seq48</b>   | Firmicutes    | Clostridia   | 73                  | 349                  | 97                  | 211                  |
| <b>seq404</b>  | Firmicutes    | Clostridia   | 0                   | 0                    | 0                   | 0                    |
| <b>seq898</b>  | Firmicutes    | Clostridia   | 0                   | 0                    | 0                   | 0                    |
| <b>seq914</b>  | Firmicutes    | Clostridia   | 0                   | 0                    | 0                   | 0                    |
| <b>seq1211</b> | Firmicutes    | Clostridia   | 0                   | 0                    | 0                   | 0                    |

Sequence Count Table

|                | <b>Phylum</b> | <b>Class</b> | <b>Δ</b> |  |  |  |
|----------------|---------------|--------------|----------|--|--|--|
| <b>seq813</b>  | Firmicutes    | Clostridia   |          |  |  |  |
| <b>seq870</b>  | Firmicutes    | Clostridia   |          |  |  |  |
| <b>seq933</b>  | Firmicutes    | Clostridia   |          |  |  |  |
| <b>seq953</b>  | Firmicutes    | Clostridia   |          |  |  |  |
| <b>seq956</b>  | Firmicutes    | Clostridia   |          |  |  |  |
| <b>seq997</b>  | Firmicutes    | Clostridia   |          |  |  |  |
| <b>seq1057</b> | Firmicutes    | Clostridia   |          |  |  |  |
| <b>seq1070</b> | Firmicutes    | Clostridia   |          |  |  |  |
| <b>seq1108</b> | Firmicutes    | Clostridia   |          |  |  |  |
| <b>seq1122</b> | Firmicutes    | Clostridia   |          |  |  |  |
| <b>seq1164</b> | Firmicutes    | Clostridia   |          |  |  |  |
| <b>seq1334</b> | Firmicutes    | Clostridia   |          |  |  |  |
| <b>seq1369</b> | Firmicutes    | Clostridia   |          |  |  |  |
| <b>seq1414</b> | Firmicutes    | Clostridia   |          |  |  |  |
| <b>seq1494</b> | Firmicutes    | Clostridia   |          |  |  |  |
| <b>seq1687</b> | Firmicutes    | Clostridia   |          |  |  |  |
| <b>seq63</b>   | Firmicutes    | Clostridia   |          |  |  |  |
| <b>seq78</b>   | Firmicutes    | Clostridia   |          |  |  |  |
| <b>seq188</b>  | Firmicutes    | Clostridia   |          |  |  |  |
| <b>seq545</b>  | Firmicutes    | Clostridia   |          |  |  |  |
| <b>seq928</b>  | Firmicutes    | Clostridia   |          |  |  |  |
| <b>seq1027</b> | Firmicutes    | Clostridia   |          |  |  |  |
| <b>seq1029</b> | Firmicutes    | Clostridia   |          |  |  |  |
| <b>seq1718</b> | Firmicutes    | Clostridia   |          |  |  |  |
| <b>seq236</b>  | Firmicutes    | Clostridia   |          |  |  |  |
| <b>seq238</b>  | Firmicutes    | Clostridia   |          |  |  |  |
| <b>seq950</b>  | Firmicutes    | Clostridia   |          |  |  |  |
| <b>seq48</b>   | Firmicutes    | Clostridia   |          |  |  |  |
| <b>seq404</b>  | Firmicutes    | Clostridia   |          |  |  |  |
| <b>seq898</b>  | Firmicutes    | Clostridia   |          |  |  |  |
| <b>seq914</b>  | Firmicutes    | Clostridia   |          |  |  |  |
| <b>seq1211</b> | Firmicutes    | Clostridia   |          |  |  |  |

Sequence Count Table

|                | <b>Phylum</b> | <b>Class</b> | <b>Order</b>  | <b>Family</b>   |
|----------------|---------------|--------------|---------------|-----------------|
| <b>seq1220</b> | Firmicutes    | Clostridia   | Clostridiales | Lachnospiraceae |
| <b>seq1222</b> | Firmicutes    | Clostridia   | Clostridiales | Lachnospiraceae |
| <b>seq1277</b> | Firmicutes    | Clostridia   | Clostridiales | Lachnospiraceae |
| <b>seq1305</b> | Firmicutes    | Clostridia   | Clostridiales | Lachnospiraceae |
| <b>seq77</b>   | Firmicutes    | Clostridia   | Clostridiales | Lachnospiraceae |
| <b>seq106</b>  | Firmicutes    | Clostridia   | Clostridiales | Lachnospiraceae |
| <b>seq297</b>  | Firmicutes    | Clostridia   | Clostridiales | Lachnospiraceae |
| <b>seq872</b>  | Firmicutes    | Clostridia   | Clostridiales | Lachnospiraceae |
| <b>seq908</b>  | Firmicutes    | Clostridia   | Clostridiales | Lachnospiraceae |
| <b>seq925</b>  | Firmicutes    | Clostridia   | Clostridiales | Lachnospiraceae |
| <b>seq1181</b> | Firmicutes    | Clostridia   | Clostridiales | Lachnospiraceae |
| <b>seq1333</b> | Firmicutes    | Clostridia   | Clostridiales | Lachnospiraceae |
| <b>seq603</b>  | Firmicutes    | Clostridia   | Clostridiales | Lachnospiraceae |
| <b>seq747</b>  | Firmicutes    | Clostridia   | Clostridiales | Lachnospiraceae |
| <b>seq1284</b> | Firmicutes    | Clostridia   | Clostridiales | Lachnospiraceae |
| <b>seq174</b>  | Firmicutes    | Clostridia   | Clostridiales | Lachnospiraceae |
| <b>seq270</b>  | Firmicutes    | Clostridia   | Clostridiales | Lachnospiraceae |
| <b>seq527</b>  | Firmicutes    | Clostridia   | Clostridiales | Lachnospiraceae |
| <b>seq837</b>  | Firmicutes    | Clostridia   | Clostridiales | Lachnospiraceae |
| <b>seq899</b>  | Firmicutes    | Clostridia   | Clostridiales | Lachnospiraceae |
| <b>seq920</b>  | Firmicutes    | Clostridia   | Clostridiales | Lachnospiraceae |
| <b>seq1090</b> | Firmicutes    | Clostridia   | Clostridiales | Lachnospiraceae |
| <b>seq1123</b> | Firmicutes    | Clostridia   | Clostridiales | Lachnospiraceae |
| <b>seq1397</b> | Firmicutes    | Clostridia   | Clostridiales | Lachnospiraceae |
| <b>seq1513</b> | Firmicutes    | Clostridia   | Clostridiales | Lachnospiraceae |
| <b>seq1553</b> | Firmicutes    | Clostridia   | Clostridiales | Lachnospiraceae |
| <b>seq1827</b> | Firmicutes    | Clostridia   | Clostridiales | Lachnospiraceae |
| <b>seq483</b>  | Firmicutes    | Clostridia   | Clostridiales | Lachnospiraceae |
| <b>seq1154</b> | Firmicutes    | Clostridia   | Clostridiales | Lachnospiraceae |
| <b>seq127</b>  | Firmicutes    | Clostridia   | Clostridiales | Lachnospiraceae |
| <b>seq179</b>  | Firmicutes    | Clostridia   | Clostridiales | Lachnospiraceae |
| <b>seq425</b>  | Firmicutes    | Clostridia   | Clostridiales | Lachnospiraceae |

Sequence Count Table

|                | <b>Phylum</b> | <b>Class</b> | <b>Genus</b>                  | <b>Species</b> |
|----------------|---------------|--------------|-------------------------------|----------------|
| <b>seq1220</b> | Firmicutes    | Clostridia   | Lachnospiraceae_ND3007_group  |                |
| <b>seq1222</b> | Firmicutes    | Clostridia   | Lachnospiraceae_ND3007_group  |                |
| <b>seq1277</b> | Firmicutes    | Clostridia   | Lachnospiraceae_ND3007_group  |                |
| <b>seq1305</b> | Firmicutes    | Clostridia   | Lachnospiraceae_ND3007_group  |                |
| <b>seq77</b>   | Firmicutes    | Clostridia   | Lachnospiraceae_NK4A136_group |                |
| <b>seq106</b>  | Firmicutes    | Clostridia   | Lachnospiraceae_NK4A136_group |                |
| <b>seq297</b>  | Firmicutes    | Clostridia   | Lachnospiraceae_NK4A136_group |                |
| <b>seq872</b>  | Firmicutes    | Clostridia   | Lachnospiraceae_NK4A136_group |                |
| <b>seq908</b>  | Firmicutes    | Clostridia   | Lachnospiraceae_NK4A136_group |                |
| <b>seq925</b>  | Firmicutes    | Clostridia   | Lachnospiraceae_NK4A136_group |                |
| <b>seq1181</b> | Firmicutes    | Clostridia   | Lachnospiraceae_NK4A136_group |                |
| <b>seq1333</b> | Firmicutes    | Clostridia   | Lachnospiraceae_NK4A136_group |                |
| <b>seq603</b>  | Firmicutes    | Clostridia   | Lachnospiraceae_NK4B4_group   |                |
| <b>seq747</b>  | Firmicutes    | Clostridia   | Lachnospiraceae_NK4B4_group   |                |
| <b>seq1284</b> | Firmicutes    | Clostridia   | Lachnospiraceae_NK4B4_group   |                |
| <b>seq174</b>  | Firmicutes    | Clostridia   | Lachnospiraceae_UCG-001       |                |
| <b>seq270</b>  | Firmicutes    | Clostridia   | Lachnospiraceae_UCG-001       | bacterium      |
| <b>seq527</b>  | Firmicutes    | Clostridia   | Lachnospiraceae_UCG-001       |                |
| <b>seq837</b>  | Firmicutes    | Clostridia   | Lachnospiraceae_UCG-001       |                |
| <b>seq899</b>  | Firmicutes    | Clostridia   | Lachnospiraceae_UCG-001       |                |
| <b>seq920</b>  | Firmicutes    | Clostridia   | Lachnospiraceae_UCG-001       |                |
| <b>seq1090</b> | Firmicutes    | Clostridia   | Lachnospiraceae_UCG-001       |                |
| <b>seq1123</b> | Firmicutes    | Clostridia   | Lachnospiraceae_UCG-001       |                |
| <b>seq1397</b> | Firmicutes    | Clostridia   | Lachnospiraceae_UCG-001       |                |
| <b>seq1513</b> | Firmicutes    | Clostridia   | Lachnospiraceae_UCG-001       |                |
| <b>seq1553</b> | Firmicutes    | Clostridia   | Lachnospiraceae_UCG-001       |                |
| <b>seq1827</b> | Firmicutes    | Clostridia   | Lachnospiraceae_UCG-002       |                |
| <b>seq483</b>  | Firmicutes    | Clostridia   | Lachnospiraceae_UCG-003       |                |
| <b>seq1154</b> | Firmicutes    | Clostridia   | Lachnospiraceae_UCG-003       |                |
| <b>seq127</b>  | Firmicutes    | Clostridia   | Lachnospiraceae_UCG-004       |                |
| <b>seq179</b>  | Firmicutes    | Clostridia   | Lachnospiraceae_UCG-004       |                |
| <b>seq425</b>  | Firmicutes    | Clostridia   | Lachnospiraceae_UCG-004       |                |

Sequence Count Table

|                | <b>Phylum</b> | <b>Class</b> | <b>Subject34WK0</b> | <b>Subject34WK12</b> | <b>Subject16WK0</b> | <b>Subject16WK12</b> |
|----------------|---------------|--------------|---------------------|----------------------|---------------------|----------------------|
| <b>seq1220</b> | Firmicutes    | Clostridia   | 0                   | 0                    | 0                   | 0                    |
| <b>seq1222</b> | Firmicutes    | Clostridia   | 0                   | 0                    | 0                   | 0                    |
| <b>seq1277</b> | Firmicutes    | Clostridia   | 0                   | 61                   | 0                   | 0                    |
| <b>seq1305</b> | Firmicutes    | Clostridia   | 0                   | 0                    | 0                   | 0                    |
| <b>seq77</b>   | Firmicutes    | Clostridia   | 0                   | 0                    | 0                   | 0                    |
| <b>seq106</b>  | Firmicutes    | Clostridia   | 0                   | 0                    | 726                 | 157                  |
| <b>seq297</b>  | Firmicutes    | Clostridia   | 0                   | 0                    | 0                   | 0                    |
| <b>seq872</b>  | Firmicutes    | Clostridia   | 0                   | 0                    | 0                   | 0                    |
| <b>seq908</b>  | Firmicutes    | Clostridia   | 0                   | 0                    | 0                   | 0                    |
| <b>seq925</b>  | Firmicutes    | Clostridia   | 0                   | 0                    | 0                   | 0                    |
| <b>seq1181</b> | Firmicutes    | Clostridia   | 0                   | 0                    | 0                   | 0                    |
| <b>seq1333</b> | Firmicutes    | Clostridia   | 0                   | 0                    | 0                   | 0                    |
| <b>seq603</b>  | Firmicutes    | Clostridia   | 0                   | 0                    | 0                   | 0                    |
| <b>seq747</b>  | Firmicutes    | Clostridia   | 0                   | 0                    | 0                   | 0                    |
| <b>seq1284</b> | Firmicutes    | Clostridia   | 0                   | 0                    | 0                   | 0                    |
| <b>seq174</b>  | Firmicutes    | Clostridia   | 24                  | 77                   | 60                  | 54                   |
| <b>seq270</b>  | Firmicutes    | Clostridia   | 0                   | 0                    | 637                 | 0                    |
| <b>seq527</b>  | Firmicutes    | Clostridia   | 0                   | 0                    | 0                   | 0                    |
| <b>seq837</b>  | Firmicutes    | Clostridia   | 0                   | 0                    | 0                   | 0                    |
| <b>seq899</b>  | Firmicutes    | Clostridia   | 0                   | 0                    | 0                   | 0                    |
| <b>seq920</b>  | Firmicutes    | Clostridia   | 0                   | 62                   | 0                   | 0                    |
| <b>seq1090</b> | Firmicutes    | Clostridia   | 0                   | 0                    | 0                   | 0                    |
| <b>seq1123</b> | Firmicutes    | Clostridia   | 0                   | 0                    | 0                   | 0                    |
| <b>seq1397</b> | Firmicutes    | Clostridia   | 0                   | 0                    | 0                   | 0                    |
| <b>seq1513</b> | Firmicutes    | Clostridia   | 0                   | 0                    | 0                   | 0                    |
| <b>seq1553</b> | Firmicutes    | Clostridia   | 0                   | 0                    | 0                   | 0                    |
| <b>seq1827</b> | Firmicutes    | Clostridia   | 0                   | 0                    | 0                   | 0                    |
| <b>seq483</b>  | Firmicutes    | Clostridia   | 0                   | 0                    | 0                   | 0                    |
| <b>seq1154</b> | Firmicutes    | Clostridia   | 0                   | 0                    | 0                   | 0                    |
| <b>seq127</b>  | Firmicutes    | Clostridia   | 56                  | 382                  | 261                 | 120                  |
| <b>seq179</b>  | Firmicutes    | Clostridia   | 0                   | 24                   | 56                  | 40                   |
| <b>seq425</b>  | Firmicutes    | Clostridia   | 0                   | 0                    | 0                   | 0                    |

Sequence Count Table

|                | <b>Phylum</b> | <b>Class</b> | <b>Subject17WK0</b> | <b>Subject17WK12</b> | <b>Subject1WK0</b> | <b>Subject1WK12</b> |
|----------------|---------------|--------------|---------------------|----------------------|--------------------|---------------------|
| <b>seq1220</b> | Firmicutes    | Clostridia   | 0                   | 0                    | 0                  | 0                   |
| <b>seq1222</b> | Firmicutes    | Clostridia   | 0                   | 0                    | 0                  | 0                   |
| <b>seq1277</b> | Firmicutes    | Clostridia   | 0                   | 0                    | 0                  | 0                   |
| <b>seq1305</b> | Firmicutes    | Clostridia   | 0                   | 0                    | 0                  | 0                   |
| <b>seq77</b>   | Firmicutes    | Clostridia   | 150                 | 216                  | 5364               | 5995                |
| <b>seq106</b>  | Firmicutes    | Clostridia   | 210                 | 417                  | 0                  | 0                   |
| <b>seq297</b>  | Firmicutes    | Clostridia   | 0                   | 0                    | 0                  | 0                   |
| <b>seq872</b>  | Firmicutes    | Clostridia   | 0                   | 0                    | 0                  | 0                   |
| <b>seq908</b>  | Firmicutes    | Clostridia   | 0                   | 0                    | 0                  | 0                   |
| <b>seq925</b>  | Firmicutes    | Clostridia   | 0                   | 0                    | 0                  | 0                   |
| <b>seq1181</b> | Firmicutes    | Clostridia   | 0                   | 0                    | 0                  | 0                   |
| <b>seq1333</b> | Firmicutes    | Clostridia   | 0                   | 0                    | 0                  | 0                   |
| <b>seq603</b>  | Firmicutes    | Clostridia   | 0                   | 0                    | 0                  | 0                   |
| <b>seq747</b>  | Firmicutes    | Clostridia   | 0                   | 0                    | 0                  | 0                   |
| <b>seq1284</b> | Firmicutes    | Clostridia   | 0                   | 0                    | 0                  | 0                   |
| <b>seq174</b>  | Firmicutes    | Clostridia   | 0                   | 0                    | 1205               | 1118                |
| <b>seq270</b>  | Firmicutes    | Clostridia   | 0                   | 0                    | 0                  | 0                   |
| <b>seq527</b>  | Firmicutes    | Clostridia   | 0                   | 0                    | 0                  | 0                   |
| <b>seq837</b>  | Firmicutes    | Clostridia   | 0                   | 0                    | 0                  | 0                   |
| <b>seq899</b>  | Firmicutes    | Clostridia   | 0                   | 0                    | 0                  | 0                   |
| <b>seq920</b>  | Firmicutes    | Clostridia   | 0                   | 0                    | 0                  | 0                   |
| <b>seq1090</b> | Firmicutes    | Clostridia   | 0                   | 0                    | 0                  | 0                   |
| <b>seq1123</b> | Firmicutes    | Clostridia   | 0                   | 0                    | 0                  | 0                   |
| <b>seq1397</b> | Firmicutes    | Clostridia   | 0                   | 0                    | 0                  | 0                   |
| <b>seq1513</b> | Firmicutes    | Clostridia   | 0                   | 0                    | 0                  | 0                   |
| <b>seq1553</b> | Firmicutes    | Clostridia   | 0                   | 0                    | 0                  | 0                   |
| <b>seq1827</b> | Firmicutes    | Clostridia   | 0                   | 0                    | 0                  | 0                   |
| <b>seq483</b>  | Firmicutes    | Clostridia   | 0                   | 0                    | 0                  | 0                   |
| <b>seq1154</b> | Firmicutes    | Clostridia   | 0                   | 0                    | 0                  | 0                   |
| <b>seq127</b>  | Firmicutes    | Clostridia   | 67                  | 23                   | 307                | 333                 |
| <b>seq179</b>  | Firmicutes    | Clostridia   | 0                   | 0                    | 0                  | 0                   |
| <b>seq425</b>  | Firmicutes    | Clostridia   | 0                   | 0                    | 0                  | 0                   |

Sequence Count Table

|                | <b>Phylum</b> | <b>Class</b> | <b>Subject2WK0</b> | <b>Subject2WK12</b> | <b>Subject3WK0</b> | <b>Subject3WK12</b> |
|----------------|---------------|--------------|--------------------|---------------------|--------------------|---------------------|
| <b>seq1220</b> | Firmicutes    | Clostridia   | 0                  | 0                   | 0                  | 0                   |
| <b>seq1222</b> | Firmicutes    | Clostridia   | 0                  | 0                   | 0                  | 0                   |
| <b>seq1277</b> | Firmicutes    | Clostridia   | 0                  | 0                   | 0                  | 0                   |
| <b>seq1305</b> | Firmicutes    | Clostridia   | 0                  | 0                   | 0                  | 0                   |
| <b>seq77</b>   | Firmicutes    | Clostridia   | 0                  | 0                   | 132                | 331                 |
| <b>seq106</b>  | Firmicutes    | Clostridia   | 319                | 233                 | 0                  | 0                   |
| <b>seq297</b>  | Firmicutes    | Clostridia   | 0                  | 0                   | 0                  | 0                   |
| <b>seq872</b>  | Firmicutes    | Clostridia   | 0                  | 0                   | 0                  | 0                   |
| <b>seq908</b>  | Firmicutes    | Clostridia   | 0                  | 0                   | 0                  | 0                   |
| <b>seq925</b>  | Firmicutes    | Clostridia   | 0                  | 0                   | 0                  | 0                   |
| <b>seq1181</b> | Firmicutes    | Clostridia   | 0                  | 0                   | 0                  | 0                   |
| <b>seq1333</b> | Firmicutes    | Clostridia   | 0                  | 0                   | 0                  | 0                   |
| <b>seq603</b>  | Firmicutes    | Clostridia   | 0                  | 0                   | 0                  | 0                   |
| <b>seq747</b>  | Firmicutes    | Clostridia   | 0                  | 0                   | 0                  | 0                   |
| <b>seq1284</b> | Firmicutes    | Clostridia   | 0                  | 0                   | 0                  | 0                   |
| <b>seq174</b>  | Firmicutes    | Clostridia   | 0                  | 0                   | 0                  | 0                   |
| <b>seq270</b>  | Firmicutes    | Clostridia   | 0                  | 0                   | 0                  | 0                   |
| <b>seq527</b>  | Firmicutes    | Clostridia   | 0                  | 0                   | 0                  | 0                   |
| <b>seq837</b>  | Firmicutes    | Clostridia   | 0                  | 0                   | 0                  | 0                   |
| <b>seq899</b>  | Firmicutes    | Clostridia   | 0                  | 0                   | 0                  | 0                   |
| <b>seq920</b>  | Firmicutes    | Clostridia   | 0                  | 0                   | 0                  | 0                   |
| <b>seq1090</b> | Firmicutes    | Clostridia   | 0                  | 0                   | 0                  | 0                   |
| <b>seq1123</b> | Firmicutes    | Clostridia   | 0                  | 0                   | 0                  | 0                   |
| <b>seq1397</b> | Firmicutes    | Clostridia   | 0                  | 0                   | 0                  | 0                   |
| <b>seq1513</b> | Firmicutes    | Clostridia   | 0                  | 0                   | 0                  | 0                   |
| <b>seq1553</b> | Firmicutes    | Clostridia   | 0                  | 0                   | 0                  | 0                   |
| <b>seq1827</b> | Firmicutes    | Clostridia   | 0                  | 0                   | 0                  | 0                   |
| <b>seq483</b>  | Firmicutes    | Clostridia   | 0                  | 0                   | 0                  | 0                   |
| <b>seq1154</b> | Firmicutes    | Clostridia   | 0                  | 0                   | 0                  | 0                   |
| <b>seq127</b>  | Firmicutes    | Clostridia   | 304                | 215                 | 150                | 1119                |
| <b>seq179</b>  | Firmicutes    | Clostridia   | 0                  | 0                   | 0                  | 0                   |
| <b>seq425</b>  | Firmicutes    | Clostridia   | 85                 | 66                  | 0                  | 272                 |



Sequence Count Table

|                | <b>Phylum</b> | <b>Class</b> | <b>Subject4WK0</b> | <b>Subject4WK12</b> | <b>Subject5WK0</b> | <b>Subject5WK12</b> |
|----------------|---------------|--------------|--------------------|---------------------|--------------------|---------------------|
| <b>seq1220</b> | Firmicutes    | Clostridia   | 0                  | 0                   | 0                  | 0                   |
| <b>seq1222</b> | Firmicutes    | Clostridia   | 0                  | 0                   | 0                  | 0                   |
| <b>seq1277</b> | Firmicutes    | Clostridia   | 0                  | 0                   | 0                  | 0                   |
| <b>seq1305</b> | Firmicutes    | Clostridia   | 0                  | 0                   | 0                  | 0                   |
| <b>seq77</b>   | Firmicutes    | Clostridia   | 81                 | 411                 | 30                 | 62                  |
| <b>seq106</b>  | Firmicutes    | Clostridia   | 163                | 0                   | 0                  | 0                   |
| <b>seq297</b>  | Firmicutes    | Clostridia   | 438                | 436                 | 0                  | 0                   |
| <b>seq872</b>  | Firmicutes    | Clostridia   | 0                  | 0                   | 0                  | 0                   |
| <b>seq908</b>  | Firmicutes    | Clostridia   | 0                  | 0                   | 0                  | 0                   |
| <b>seq925</b>  | Firmicutes    | Clostridia   | 0                  | 0                   | 0                  | 0                   |
| <b>seq1181</b> | Firmicutes    | Clostridia   | 0                  | 0                   | 0                  | 0                   |
| <b>seq1333</b> | Firmicutes    | Clostridia   | 0                  | 0                   | 0                  | 0                   |
| <b>seq603</b>  | Firmicutes    | Clostridia   | 149                | 111                 | 0                  | 0                   |
| <b>seq747</b>  | Firmicutes    | Clostridia   | 0                  | 0                   | 0                  | 0                   |
| <b>seq1284</b> | Firmicutes    | Clostridia   | 0                  | 0                   | 0                  | 0                   |
| <b>seq174</b>  | Firmicutes    | Clostridia   | 92                 | 11                  | 77                 | 50                  |
| <b>seq270</b>  | Firmicutes    | Clostridia   | 0                  | 0                   | 0                  | 0                   |
| <b>seq527</b>  | Firmicutes    | Clostridia   | 0                  | 20                  | 0                  | 0                   |
| <b>seq837</b>  | Firmicutes    | Clostridia   | 0                  | 0                   | 0                  | 0                   |
| <b>seq899</b>  | Firmicutes    | Clostridia   | 0                  | 0                   | 0                  | 0                   |
| <b>seq920</b>  | Firmicutes    | Clostridia   | 0                  | 0                   | 0                  | 0                   |
| <b>seq1090</b> | Firmicutes    | Clostridia   | 0                  | 0                   | 0                  | 0                   |
| <b>seq1123</b> | Firmicutes    | Clostridia   | 0                  | 0                   | 0                  | 0                   |
| <b>seq1397</b> | Firmicutes    | Clostridia   | 0                  | 0                   | 0                  | 0                   |
| <b>seq1513</b> | Firmicutes    | Clostridia   | 0                  | 0                   | 0                  | 0                   |
| <b>seq1553</b> | Firmicutes    | Clostridia   | 0                  | 0                   | 0                  | 0                   |
| <b>seq1827</b> | Firmicutes    | Clostridia   | 0                  | 0                   | 0                  | 0                   |
| <b>seq483</b>  | Firmicutes    | Clostridia   | 0                  | 0                   | 0                  | 0                   |
| <b>seq1154</b> | Firmicutes    | Clostridia   | 0                  | 0                   | 0                  | 0                   |
| <b>seq127</b>  | Firmicutes    | Clostridia   | 46                 | 334                 | 0                  | 0                   |
| <b>seq179</b>  | Firmicutes    | Clostridia   | 0                  | 0                   | 11                 | 0                   |
| <b>seq425</b>  | Firmicutes    | Clostridia   | 0                  | 0                   | 0                  | 0                   |

Sequence Count Table

|                | <b>Phylum</b> | <b>Class</b> | <b>Subject6WK0</b> | <b>Subject6WK12</b> | <b>Subject18WK0</b> | <b>Subject18WK12</b> |
|----------------|---------------|--------------|--------------------|---------------------|---------------------|----------------------|
| <b>seq1220</b> | Firmicutes    | Clostridia   | 0                  | 0                   | 0                   | 0                    |
| <b>seq1222</b> | Firmicutes    | Clostridia   | 0                  | 0                   | 0                   | 0                    |
| <b>seq1277</b> | Firmicutes    | Clostridia   | 0                  | 0                   | 0                   | 0                    |
| <b>seq1305</b> | Firmicutes    | Clostridia   | 0                  | 56                  | 0                   | 0                    |
| <b>seq77</b>   | Firmicutes    | Clostridia   | 0                  | 636                 | 265                 | 17                   |
| <b>seq106</b>  | Firmicutes    | Clostridia   | 1477               | 1292                | 75                  | 0                    |
| <b>seq297</b>  | Firmicutes    | Clostridia   | 178                | 0                   | 0                   | 0                    |
| <b>seq872</b>  | Firmicutes    | Clostridia   | 0                  | 0                   | 0                   | 0                    |
| <b>seq908</b>  | Firmicutes    | Clostridia   | 14                 | 0                   | 0                   | 0                    |
| <b>seq925</b>  | Firmicutes    | Clostridia   | 0                  | 0                   | 0                   | 0                    |
| <b>seq1181</b> | Firmicutes    | Clostridia   | 0                  | 0                   | 0                   | 0                    |
| <b>seq1333</b> | Firmicutes    | Clostridia   | 0                  | 0                   | 0                   | 0                    |
| <b>seq603</b>  | Firmicutes    | Clostridia   | 88                 | 16                  | 0                   | 0                    |
| <b>seq747</b>  | Firmicutes    | Clostridia   | 0                  | 0                   | 0                   | 0                    |
| <b>seq1284</b> | Firmicutes    | Clostridia   | 0                  | 0                   | 0                   | 0                    |
| <b>seq174</b>  | Firmicutes    | Clostridia   | 50                 | 17                  | 78                  | 0                    |
| <b>seq270</b>  | Firmicutes    | Clostridia   | 0                  | 0                   | 241                 | 0                    |
| <b>seq527</b>  | Firmicutes    | Clostridia   | 0                  | 0                   | 57                  | 0                    |
| <b>seq837</b>  | Firmicutes    | Clostridia   | 0                  | 0                   | 0                   | 0                    |
| <b>seq899</b>  | Firmicutes    | Clostridia   | 0                  | 0                   | 0                   | 0                    |
| <b>seq920</b>  | Firmicutes    | Clostridia   | 0                  | 0                   | 0                   | 0                    |
| <b>seq1090</b> | Firmicutes    | Clostridia   | 0                  | 0                   | 0                   | 0                    |
| <b>seq1123</b> | Firmicutes    | Clostridia   | 0                  | 0                   | 0                   | 0                    |
| <b>seq1397</b> | Firmicutes    | Clostridia   | 0                  | 0                   | 0                   | 0                    |
| <b>seq1513</b> | Firmicutes    | Clostridia   | 0                  | 0                   | 0                   | 0                    |
| <b>seq1553</b> | Firmicutes    | Clostridia   | 0                  | 23                  | 0                   | 0                    |
| <b>seq1827</b> | Firmicutes    | Clostridia   | 0                  | 0                   | 0                   | 0                    |
| <b>seq483</b>  | Firmicutes    | Clostridia   | 0                  | 0                   | 0                   | 0                    |
| <b>seq1154</b> | Firmicutes    | Clostridia   | 0                  | 0                   | 0                   | 0                    |
| <b>seq127</b>  | Firmicutes    | Clostridia   | 66                 | 124                 | 209                 | 99                   |
| <b>seq179</b>  | Firmicutes    | Clostridia   | 57                 | 87                  | 0                   | 0                    |
| <b>seq425</b>  | Firmicutes    | Clostridia   | 0                  | 0                   | 0                   | 0                    |

Sequence Count Table

|                | <b>Phylum</b> | <b>Class</b> | <b>Subject19WK0</b> | <b>Subject19WK12</b> | <b>Subject20WK0</b> | <b>Subject20WK12</b> |
|----------------|---------------|--------------|---------------------|----------------------|---------------------|----------------------|
| <b>seq1220</b> | Firmicutes    | Clostridia   | 0                   | 0                    | 0                   | 0                    |
| <b>seq1222</b> | Firmicutes    | Clostridia   | 0                   | 0                    | 0                   | 0                    |
| <b>seq1277</b> | Firmicutes    | Clostridia   | 0                   | 0                    | 0                   | 0                    |
| <b>seq1305</b> | Firmicutes    | Clostridia   | 0                   | 0                    | 0                   | 0                    |
| <b>seq77</b>   | Firmicutes    | Clostridia   | 0                   | 26                   | 0                   | 0                    |
| <b>seq106</b>  | Firmicutes    | Clostridia   | 25                  | 0                    | 423                 | 148                  |
| <b>seq297</b>  | Firmicutes    | Clostridia   | 0                   | 0                    | 18                  | 123                  |
| <b>seq872</b>  | Firmicutes    | Clostridia   | 0                   | 0                    | 0                   | 0                    |
| <b>seq908</b>  | Firmicutes    | Clostridia   | 0                   | 0                    | 126                 | 32                   |
| <b>seq925</b>  | Firmicutes    | Clostridia   | 0                   | 0                    | 0                   | 0                    |
| <b>seq1181</b> | Firmicutes    | Clostridia   | 0                   | 0                    | 0                   | 0                    |
| <b>seq1333</b> | Firmicutes    | Clostridia   | 0                   | 0                    | 0                   | 0                    |
| <b>seq603</b>  | Firmicutes    | Clostridia   | 0                   | 0                    | 0                   | 0                    |
| <b>seq747</b>  | Firmicutes    | Clostridia   | 0                   | 0                    | 20                  | 8                    |
| <b>seq1284</b> | Firmicutes    | Clostridia   | 0                   | 0                    | 0                   | 0                    |
| <b>seq174</b>  | Firmicutes    | Clostridia   | 0                   | 0                    | 13                  | 0                    |
| <b>seq270</b>  | Firmicutes    | Clostridia   | 0                   | 0                    | 0                   | 0                    |
| <b>seq527</b>  | Firmicutes    | Clostridia   | 0                   | 0                    | 61                  | 68                   |
| <b>seq837</b>  | Firmicutes    | Clostridia   | 0                   | 0                    | 0                   | 0                    |
| <b>seq899</b>  | Firmicutes    | Clostridia   | 0                   | 0                    | 0                   | 0                    |
| <b>seq920</b>  | Firmicutes    | Clostridia   | 0                   | 0                    | 0                   | 44                   |
| <b>seq1090</b> | Firmicutes    | Clostridia   | 0                   | 0                    | 0                   | 0                    |
| <b>seq1123</b> | Firmicutes    | Clostridia   | 0                   | 0                    | 0                   | 0                    |
| <b>seq1397</b> | Firmicutes    | Clostridia   | 0                   | 0                    | 0                   | 0                    |
| <b>seq1513</b> | Firmicutes    | Clostridia   | 0                   | 0                    | 0                   | 27                   |
| <b>seq1553</b> | Firmicutes    | Clostridia   | 0                   | 0                    | 0                   | 0                    |
| <b>seq1827</b> | Firmicutes    | Clostridia   | 0                   | 0                    | 6                   | 0                    |
| <b>seq483</b>  | Firmicutes    | Clostridia   | 0                   | 0                    | 0                   | 0                    |
| <b>seq1154</b> | Firmicutes    | Clostridia   | 0                   | 0                    | 0                   | 0                    |
| <b>seq127</b>  | Firmicutes    | Clostridia   | 0                   | 0                    | 106                 | 323                  |
| <b>seq179</b>  | Firmicutes    | Clostridia   | 829                 | 470                  | 0                   | 17                   |
| <b>seq425</b>  | Firmicutes    | Clostridia   | 0                   | 0                    | 0                   | 0                    |

Sequence Count Table

|                | <b>Phylum</b> | <b>Class</b> | <b>Subject7WK0</b> | <b>Subject7WK12</b> | <b>Subject21WK0</b> | <b>Subject21WK12</b> |
|----------------|---------------|--------------|--------------------|---------------------|---------------------|----------------------|
| <b>seq1220</b> | Firmicutes    | Clostridia   | 0                  | 0                   | 0                   | 0                    |
| <b>seq1222</b> | Firmicutes    | Clostridia   | 0                  | 0                   | 0                   | 0                    |
| <b>seq1277</b> | Firmicutes    | Clostridia   | 0                  | 0                   | 0                   | 0                    |
| <b>seq1305</b> | Firmicutes    | Clostridia   | 0                  | 0                   | 0                   | 0                    |
| <b>seq77</b>   | Firmicutes    | Clostridia   | 0                  | 0                   | 0                   | 0                    |
| <b>seq106</b>  | Firmicutes    | Clostridia   | 0                  | 0                   | 68                  | 0                    |
| <b>seq297</b>  | Firmicutes    | Clostridia   | 0                  | 0                   | 0                   | 0                    |
| <b>seq872</b>  | Firmicutes    | Clostridia   | 0                  | 0                   | 0                   | 0                    |
| <b>seq908</b>  | Firmicutes    | Clostridia   | 0                  | 0                   | 0                   | 0                    |
| <b>seq925</b>  | Firmicutes    | Clostridia   | 0                  | 0                   | 0                   | 0                    |
| <b>seq1181</b> | Firmicutes    | Clostridia   | 0                  | 0                   | 0                   | 0                    |
| <b>seq1333</b> | Firmicutes    | Clostridia   | 0                  | 0                   | 0                   | 0                    |
| <b>seq603</b>  | Firmicutes    | Clostridia   | 0                  | 0                   | 0                   | 0                    |
| <b>seq747</b>  | Firmicutes    | Clostridia   | 0                  | 0                   | 0                   | 0                    |
| <b>seq1284</b> | Firmicutes    | Clostridia   | 0                  | 60                  | 0                   | 0                    |
| <b>seq174</b>  | Firmicutes    | Clostridia   | 10                 | 85                  | 0                   | 0                    |
| <b>seq270</b>  | Firmicutes    | Clostridia   | 0                  | 0                   | 0                   | 0                    |
| <b>seq527</b>  | Firmicutes    | Clostridia   | 0                  | 0                   | 0                   | 0                    |
| <b>seq837</b>  | Firmicutes    | Clostridia   | 0                  | 0                   | 0                   | 0                    |
| <b>seq899</b>  | Firmicutes    | Clostridia   | 0                  | 0                   | 0                   | 0                    |
| <b>seq920</b>  | Firmicutes    | Clostridia   | 0                  | 0                   | 0                   | 0                    |
| <b>seq1090</b> | Firmicutes    | Clostridia   | 0                  | 0                   | 0                   | 0                    |
| <b>seq1123</b> | Firmicutes    | Clostridia   | 0                  | 0                   | 0                   | 0                    |
| <b>seq1397</b> | Firmicutes    | Clostridia   | 0                  | 0                   | 0                   | 0                    |
| <b>seq1513</b> | Firmicutes    | Clostridia   | 0                  | 0                   | 0                   | 0                    |
| <b>seq1553</b> | Firmicutes    | Clostridia   | 0                  | 0                   | 0                   | 0                    |
| <b>seq1827</b> | Firmicutes    | Clostridia   | 0                  | 0                   | 0                   | 0                    |
| <b>seq483</b>  | Firmicutes    | Clostridia   | 0                  | 0                   | 0                   | 0                    |
| <b>seq1154</b> | Firmicutes    | Clostridia   | 0                  | 0                   | 0                   | 0                    |
| <b>seq127</b>  | Firmicutes    | Clostridia   | 121                | 709                 | 0                   | 0                    |
| <b>seq179</b>  | Firmicutes    | Clostridia   | 56                 | 118                 | 1746                | 1247                 |
| <b>seq425</b>  | Firmicutes    | Clostridia   | 0                  | 225                 | 0                   | 0                    |

Sequence Count Table

|                | <b>Phylum</b> | <b>Class</b> | <b>Subject8WK0</b> | <b>Subject8WK12</b> | <b>Subject9WK0</b> | <b>Subject9WK12</b> |
|----------------|---------------|--------------|--------------------|---------------------|--------------------|---------------------|
| <b>seq1220</b> | Firmicutes    | Clostridia   | 34                 | 40                  | 0                  | 0                   |
| <b>seq1222</b> | Firmicutes    | Clostridia   | 0                  | 0                   | 0                  | 0                   |
| <b>seq1277</b> | Firmicutes    | Clostridia   | 0                  | 0                   | 0                  | 0                   |
| <b>seq1305</b> | Firmicutes    | Clostridia   | 0                  | 0                   | 0                  | 0                   |
| <b>seq77</b>   | Firmicutes    | Clostridia   | 424                | 63                  | 0                  | 0                   |
| <b>seq106</b>  | Firmicutes    | Clostridia   | 0                  | 0                   | 284                | 0                   |
| <b>seq297</b>  | Firmicutes    | Clostridia   | 0                  | 0                   | 0                  | 0                   |
| <b>seq872</b>  | Firmicutes    | Clostridia   | 0                  | 0                   | 0                  | 0                   |
| <b>seq908</b>  | Firmicutes    | Clostridia   | 0                  | 0                   | 0                  | 0                   |
| <b>seq925</b>  | Firmicutes    | Clostridia   | 0                  | 0                   | 0                  | 0                   |
| <b>seq1181</b> | Firmicutes    | Clostridia   | 0                  | 0                   | 0                  | 0                   |
| <b>seq1333</b> | Firmicutes    | Clostridia   | 0                  | 0                   | 0                  | 0                   |
| <b>seq603</b>  | Firmicutes    | Clostridia   | 0                  | 0                   | 0                  | 0                   |
| <b>seq747</b>  | Firmicutes    | Clostridia   | 0                  | 0                   | 0                  | 0                   |
| <b>seq1284</b> | Firmicutes    | Clostridia   | 0                  | 0                   | 0                  | 0                   |
| <b>seq174</b>  | Firmicutes    | Clostridia   | 437                | 17                  | 84                 | 0                   |
| <b>seq270</b>  | Firmicutes    | Clostridia   | 0                  | 0                   | 0                  | 0                   |
| <b>seq527</b>  | Firmicutes    | Clostridia   | 0                  | 0                   | 0                  | 0                   |
| <b>seq837</b>  | Firmicutes    | Clostridia   | 235                | 0                   | 0                  | 0                   |
| <b>seq899</b>  | Firmicutes    | Clostridia   | 197                | 0                   | 0                  | 0                   |
| <b>seq920</b>  | Firmicutes    | Clostridia   | 0                  | 0                   | 0                  | 0                   |
| <b>seq1090</b> | Firmicutes    | Clostridia   | 0                  | 0                   | 0                  | 0                   |
| <b>seq1123</b> | Firmicutes    | Clostridia   | 0                  | 0                   | 0                  | 0                   |
| <b>seq1397</b> | Firmicutes    | Clostridia   | 0                  | 0                   | 0                  | 0                   |
| <b>seq1513</b> | Firmicutes    | Clostridia   | 0                  | 0                   | 0                  | 0                   |
| <b>seq1553</b> | Firmicutes    | Clostridia   | 0                  | 0                   | 0                  | 0                   |
| <b>seq1827</b> | Firmicutes    | Clostridia   | 0                  | 0                   | 0                  | 0                   |
| <b>seq483</b>  | Firmicutes    | Clostridia   | 0                  | 0                   | 0                  | 0                   |
| <b>seq1154</b> | Firmicutes    | Clostridia   | 0                  | 0                   | 0                  | 0                   |
| <b>seq127</b>  | Firmicutes    | Clostridia   | 497                | 170                 | 0                  | 0                   |
| <b>seq179</b>  | Firmicutes    | Clostridia   | 43                 | 0                   | 56                 | 496                 |
| <b>seq425</b>  | Firmicutes    | Clostridia   | 0                  | 0                   | 0                  | 0                   |

Sequence Count Table

|                | <b>Phylum</b> | <b>Class</b> | <b>Subject10WK0</b> | <b>Subject10WK12</b> | <b>Subject22WK0</b> | <b>Subject22WK12</b> |
|----------------|---------------|--------------|---------------------|----------------------|---------------------|----------------------|
| <b>seq1220</b> | Firmicutes    | Clostridia   | 0                   | 0                    | 0                   | 0                    |
| <b>seq1222</b> | Firmicutes    | Clostridia   | 0                   | 0                    | 0                   | 0                    |
| <b>seq1277</b> | Firmicutes    | Clostridia   | 0                   | 0                    | 0                   | 0                    |
| <b>seq1305</b> | Firmicutes    | Clostridia   | 0                   | 0                    | 0                   | 0                    |
| <b>seq77</b>   | Firmicutes    | Clostridia   | 564                 | 244                  | 184                 | 435                  |
| <b>seq106</b>  | Firmicutes    | Clostridia   | 188                 | 71                   | 344                 | 100                  |
| <b>seq297</b>  | Firmicutes    | Clostridia   | 207                 | 104                  | 185                 | 101                  |
| <b>seq872</b>  | Firmicutes    | Clostridia   | 0                   | 0                    | 0                   | 0                    |
| <b>seq908</b>  | Firmicutes    | Clostridia   | 0                   | 0                    | 0                   | 18                   |
| <b>seq925</b>  | Firmicutes    | Clostridia   | 0                   | 0                    | 0                   | 0                    |
| <b>seq1181</b> | Firmicutes    | Clostridia   | 0                   | 0                    | 0                   | 86                   |
| <b>seq1333</b> | Firmicutes    | Clostridia   | 0                   | 0                    | 0                   | 51                   |
| <b>seq603</b>  | Firmicutes    | Clostridia   | 0                   | 0                    | 0                   | 0                    |
| <b>seq747</b>  | Firmicutes    | Clostridia   | 0                   | 0                    | 0                   | 0                    |
| <b>seq1284</b> | Firmicutes    | Clostridia   | 0                   | 0                    | 0                   | 0                    |
| <b>seq174</b>  | Firmicutes    | Clostridia   | 247                 | 123                  | 194                 | 162                  |
| <b>seq270</b>  | Firmicutes    | Clostridia   | 0                   | 0                    | 0                   | 0                    |
| <b>seq527</b>  | Firmicutes    | Clostridia   | 0                   | 0                    | 0                   | 0                    |
| <b>seq837</b>  | Firmicutes    | Clostridia   | 0                   | 0                    | 0                   | 0                    |
| <b>seq899</b>  | Firmicutes    | Clostridia   | 0                   | 0                    | 0                   | 0                    |
| <b>seq920</b>  | Firmicutes    | Clostridia   | 0                   | 0                    | 59                  | 19                   |
| <b>seq1090</b> | Firmicutes    | Clostridia   | 0                   | 0                    | 0                   | 0                    |
| <b>seq1123</b> | Firmicutes    | Clostridia   | 0                   | 0                    | 0                   | 0                    |
| <b>seq1397</b> | Firmicutes    | Clostridia   | 0                   | 42                   | 0                   | 0                    |
| <b>seq1513</b> | Firmicutes    | Clostridia   | 0                   | 0                    | 0                   | 0                    |
| <b>seq1553</b> | Firmicutes    | Clostridia   | 0                   | 0                    | 0                   | 0                    |
| <b>seq1827</b> | Firmicutes    | Clostridia   | 0                   | 0                    | 0                   | 0                    |
| <b>seq483</b>  | Firmicutes    | Clostridia   | 0                   | 0                    | 0                   | 0                    |
| <b>seq1154</b> | Firmicutes    | Clostridia   | 0                   | 0                    | 0                   | 0                    |
| <b>seq127</b>  | Firmicutes    | Clostridia   | 412                 | 295                  | 125                 | 0                    |
| <b>seq179</b>  | Firmicutes    | Clostridia   | 0                   | 0                    | 106                 | 32                   |
| <b>seq425</b>  | Firmicutes    | Clostridia   | 0                   | 0                    | 0                   | 69                   |

Sequence Count Table

|                | <b>Phylum</b> | <b>Class</b> | <b>Subject23WK0</b> | <b>Subject23WK12</b> | <b>Subject24WK0</b> | <b>Subject24WK12</b> |
|----------------|---------------|--------------|---------------------|----------------------|---------------------|----------------------|
| <b>seq1220</b> | Firmicutes    | Clostridia   | 0                   | 0                    | 0                   | 0                    |
| <b>seq1222</b> | Firmicutes    | Clostridia   | 0                   | 0                    | 0                   | 0                    |
| <b>seq1277</b> | Firmicutes    | Clostridia   | 0                   | 0                    | 0                   | 0                    |
| <b>seq1305</b> | Firmicutes    | Clostridia   | 0                   | 0                    | 0                   | 0                    |
| <b>seq77</b>   | Firmicutes    | Clostridia   | 289                 | 1140                 | 124                 | 114                  |
| <b>seq106</b>  | Firmicutes    | Clostridia   | 931                 | 2001                 | 222                 | 0                    |
| <b>seq297</b>  | Firmicutes    | Clostridia   | 0                   | 61                   | 0                   | 0                    |
| <b>seq872</b>  | Firmicutes    | Clostridia   | 0                   | 0                    | 0                   | 0                    |
| <b>seq908</b>  | Firmicutes    | Clostridia   | 0                   | 0                    | 0                   | 0                    |
| <b>seq925</b>  | Firmicutes    | Clostridia   | 0                   | 0                    | 0                   | 0                    |
| <b>seq1181</b> | Firmicutes    | Clostridia   | 0                   | 0                    | 0                   | 0                    |
| <b>seq1333</b> | Firmicutes    | Clostridia   | 0                   | 0                    | 0                   | 0                    |
| <b>seq603</b>  | Firmicutes    | Clostridia   | 0                   | 0                    | 0                   | 0                    |
| <b>seq747</b>  | Firmicutes    | Clostridia   | 0                   | 0                    | 0                   | 0                    |
| <b>seq1284</b> | Firmicutes    | Clostridia   | 0                   | 0                    | 0                   | 0                    |
| <b>seq174</b>  | Firmicutes    | Clostridia   | 217                 | 285                  | 307                 | 0                    |
| <b>seq270</b>  | Firmicutes    | Clostridia   | 144                 | 171                  | 285                 | 69                   |
| <b>seq527</b>  | Firmicutes    | Clostridia   | 0                   | 0                    | 0                   | 0                    |
| <b>seq837</b>  | Firmicutes    | Clostridia   | 0                   | 0                    | 0                   | 0                    |
| <b>seq899</b>  | Firmicutes    | Clostridia   | 0                   | 0                    | 0                   | 0                    |
| <b>seq920</b>  | Firmicutes    | Clostridia   | 0                   | 0                    | 0                   | 0                    |
| <b>seq1090</b> | Firmicutes    | Clostridia   | 0                   | 0                    | 109                 | 0                    |
| <b>seq1123</b> | Firmicutes    | Clostridia   | 0                   | 0                    | 99                  | 0                    |
| <b>seq1397</b> | Firmicutes    | Clostridia   | 0                   | 0                    | 0                   | 0                    |
| <b>seq1513</b> | Firmicutes    | Clostridia   | 0                   | 0                    | 0                   | 0                    |
| <b>seq1553</b> | Firmicutes    | Clostridia   | 0                   | 0                    | 0                   | 0                    |
| <b>seq1827</b> | Firmicutes    | Clostridia   | 0                   | 0                    | 0                   | 0                    |
| <b>seq483</b>  | Firmicutes    | Clostridia   | 130                 | 453                  | 0                   | 0                    |
| <b>seq1154</b> | Firmicutes    | Clostridia   | 0                   | 92                   | 0                   | 0                    |
| <b>seq127</b>  | Firmicutes    | Clostridia   | 199                 | 228                  | 179                 | 108                  |
| <b>seq179</b>  | Firmicutes    | Clostridia   | 48                  | 67                   | 258                 | 44                   |
| <b>seq425</b>  | Firmicutes    | Clostridia   | 0                   | 0                    | 0                   | 0                    |

Sequence Count Table

|                | <b>Phylum</b> | <b>Class</b> | <b>Subject11WK0</b> | <b>Subject11WK12</b> | <b>Subject12WK0</b> | <b>Subject12WK12</b> |
|----------------|---------------|--------------|---------------------|----------------------|---------------------|----------------------|
| <b>seq1220</b> | Firmicutes    | Clostridia   | 0                   | 0                    | 0                   | 0                    |
| <b>seq1222</b> | Firmicutes    | Clostridia   | 0                   | 0                    | 74                  | 0                    |
| <b>seq1277</b> | Firmicutes    | Clostridia   | 0                   | 0                    | 0                   | 0                    |
| <b>seq1305</b> | Firmicutes    | Clostridia   | 0                   | 0                    | 0                   | 0                    |
| <b>seq77</b>   | Firmicutes    | Clostridia   | 67                  | 0                    | 129                 | 71                   |
| <b>seq106</b>  | Firmicutes    | Clostridia   | 0                   | 0                    | 0                   | 66                   |
| <b>seq297</b>  | Firmicutes    | Clostridia   | 0                   | 0                    | 0                   | 0                    |
| <b>seq872</b>  | Firmicutes    | Clostridia   | 0                   | 0                    | 0                   | 0                    |
| <b>seq908</b>  | Firmicutes    | Clostridia   | 0                   | 0                    | 0                   | 0                    |
| <b>seq925</b>  | Firmicutes    | Clostridia   | 0                   | 0                    | 0                   | 0                    |
| <b>seq1181</b> | Firmicutes    | Clostridia   | 0                   | 0                    | 0                   | 0                    |
| <b>seq1333</b> | Firmicutes    | Clostridia   | 0                   | 0                    | 0                   | 0                    |
| <b>seq603</b>  | Firmicutes    | Clostridia   | 0                   | 0                    | 0                   | 0                    |
| <b>seq747</b>  | Firmicutes    | Clostridia   | 0                   | 0                    | 0                   | 0                    |
| <b>seq1284</b> | Firmicutes    | Clostridia   | 0                   | 0                    | 0                   | 0                    |
| <b>seq174</b>  | Firmicutes    | Clostridia   | 0                   | 0                    | 45                  | 39                   |
| <b>seq270</b>  | Firmicutes    | Clostridia   | 0                   | 0                    | 360                 | 126                  |
| <b>seq527</b>  | Firmicutes    | Clostridia   | 0                   | 0                    | 295                 | 86                   |
| <b>seq837</b>  | Firmicutes    | Clostridia   | 0                   | 0                    | 0                   | 0                    |
| <b>seq899</b>  | Firmicutes    | Clostridia   | 0                   | 0                    | 0                   | 0                    |
| <b>seq920</b>  | Firmicutes    | Clostridia   | 0                   | 0                    | 0                   | 0                    |
| <b>seq1090</b> | Firmicutes    | Clostridia   | 0                   | 0                    | 0                   | 0                    |
| <b>seq1123</b> | Firmicutes    | Clostridia   | 0                   | 0                    | 0                   | 0                    |
| <b>seq1397</b> | Firmicutes    | Clostridia   | 0                   | 0                    | 0                   | 0                    |
| <b>seq1513</b> | Firmicutes    | Clostridia   | 0                   | 0                    | 0                   | 0                    |
| <b>seq1553</b> | Firmicutes    | Clostridia   | 0                   | 0                    | 0                   | 0                    |
| <b>seq1827</b> | Firmicutes    | Clostridia   | 0                   | 0                    | 0                   | 0                    |
| <b>seq483</b>  | Firmicutes    | Clostridia   | 0                   | 0                    | 0                   | 0                    |
| <b>seq1154</b> | Firmicutes    | Clostridia   | 0                   | 0                    | 0                   | 0                    |
| <b>seq127</b>  | Firmicutes    | Clostridia   | 319                 | 1160                 | 155                 | 172                  |
| <b>seq179</b>  | Firmicutes    | Clostridia   | 0                   | 0                    | 35                  | 63                   |
| <b>seq425</b>  | Firmicutes    | Clostridia   | 0                   | 0                    | 0                   | 0                    |



Sequence Count Table

|                | <b>Phylum</b> | <b>Class</b> | <b>Subject25WK0</b> | <b>Subject25WK12</b> | <b>Subject38WK0</b> | <b>Subject38WK12</b> |
|----------------|---------------|--------------|---------------------|----------------------|---------------------|----------------------|
| <b>seq1220</b> | Firmicutes    | Clostridia   | 0                   | 0                    | 0                   | 0                    |
| <b>seq1222</b> | Firmicutes    | Clostridia   | 0                   | 0                    | 0                   | 0                    |
| <b>seq1277</b> | Firmicutes    | Clostridia   | 0                   | 0                    | 0                   | 0                    |
| <b>seq1305</b> | Firmicutes    | Clostridia   | 0                   | 0                    | 0                   | 0                    |
| <b>seq77</b>   | Firmicutes    | Clostridia   | 28                  | 0                    | 0                   | 0                    |
| <b>seq106</b>  | Firmicutes    | Clostridia   | 0                   | 0                    | 0                   | 0                    |
| <b>seq297</b>  | Firmicutes    | Clostridia   | 0                   | 0                    | 0                   | 0                    |
| <b>seq872</b>  | Firmicutes    | Clostridia   | 0                   | 0                    | 0                   | 0                    |
| <b>seq908</b>  | Firmicutes    | Clostridia   | 0                   | 0                    | 0                   | 0                    |
| <b>seq925</b>  | Firmicutes    | Clostridia   | 0                   | 0                    | 0                   | 0                    |
| <b>seq1181</b> | Firmicutes    | Clostridia   | 0                   | 0                    | 0                   | 0                    |
| <b>seq1333</b> | Firmicutes    | Clostridia   | 0                   | 0                    | 0                   | 0                    |
| <b>seq603</b>  | Firmicutes    | Clostridia   | 93                  | 0                    | 0                   | 0                    |
| <b>seq747</b>  | Firmicutes    | Clostridia   | 0                   | 0                    | 0                   | 0                    |
| <b>seq1284</b> | Firmicutes    | Clostridia   | 0                   | 0                    | 0                   | 0                    |
| <b>seq174</b>  | Firmicutes    | Clostridia   | 70                  | 0                    | 0                   | 0                    |
| <b>seq270</b>  | Firmicutes    | Clostridia   | 0                   | 0                    | 0                   | 0                    |
| <b>seq527</b>  | Firmicutes    | Clostridia   | 37                  | 0                    | 0                   | 0                    |
| <b>seq837</b>  | Firmicutes    | Clostridia   | 0                   | 0                    | 0                   | 0                    |
| <b>seq899</b>  | Firmicutes    | Clostridia   | 0                   | 0                    | 0                   | 0                    |
| <b>seq920</b>  | Firmicutes    | Clostridia   | 0                   | 0                    | 0                   | 0                    |
| <b>seq1090</b> | Firmicutes    | Clostridia   | 0                   | 0                    | 0                   | 0                    |
| <b>seq1123</b> | Firmicutes    | Clostridia   | 0                   | 0                    | 0                   | 0                    |
| <b>seq1397</b> | Firmicutes    | Clostridia   | 0                   | 0                    | 0                   | 0                    |
| <b>seq1513</b> | Firmicutes    | Clostridia   | 0                   | 0                    | 0                   | 0                    |
| <b>seq1553</b> | Firmicutes    | Clostridia   | 0                   | 0                    | 0                   | 0                    |
| <b>seq1827</b> | Firmicutes    | Clostridia   | 0                   | 0                    | 0                   | 0                    |
| <b>seq483</b>  | Firmicutes    | Clostridia   | 0                   | 0                    | 0                   | 0                    |
| <b>seq1154</b> | Firmicutes    | Clostridia   | 0                   | 0                    | 0                   | 0                    |
| <b>seq127</b>  | Firmicutes    | Clostridia   | 21                  | 0                    | 0                   | 0                    |
| <b>seq179</b>  | Firmicutes    | Clostridia   | 0                   | 0                    | 0                   | 0                    |
| <b>seq425</b>  | Firmicutes    | Clostridia   | 0                   | 0                    | 0                   | 0                    |

Sequence Count Table

|                | <b>Phylum</b> | <b>Class</b> | <b>Subject31WK0</b> | <b>Subject31WK12</b> | <b>Subject32WK0</b> | <b>Subject32WK12</b> |
|----------------|---------------|--------------|---------------------|----------------------|---------------------|----------------------|
| <b>seq1220</b> | Firmicutes    | Clostridia   | 0                   | 0                    | 0                   | 0                    |
| <b>seq1222</b> | Firmicutes    | Clostridia   | 0                   | 0                    | 0                   | 0                    |
| <b>seq1277</b> | Firmicutes    | Clostridia   | 0                   | 0                    | 0                   | 0                    |
| <b>seq1305</b> | Firmicutes    | Clostridia   | 0                   | 0                    | 0                   | 0                    |
| <b>seq77</b>   | Firmicutes    | Clostridia   | 0                   | 0                    | 0                   | 0                    |
| <b>seq106</b>  | Firmicutes    | Clostridia   | 0                   | 0                    | 23                  | 0                    |
| <b>seq297</b>  | Firmicutes    | Clostridia   | 0                   | 0                    | 0                   | 0                    |
| <b>seq872</b>  | Firmicutes    | Clostridia   | 0                   | 0                    | 0                   | 0                    |
| <b>seq908</b>  | Firmicutes    | Clostridia   | 0                   | 0                    | 0                   | 0                    |
| <b>seq925</b>  | Firmicutes    | Clostridia   | 0                   | 0                    | 0                   | 0                    |
| <b>seq1181</b> | Firmicutes    | Clostridia   | 0                   | 0                    | 0                   | 0                    |
| <b>seq1333</b> | Firmicutes    | Clostridia   | 0                   | 0                    | 0                   | 0                    |
| <b>seq603</b>  | Firmicutes    | Clostridia   | 0                   | 0                    | 0                   | 0                    |
| <b>seq747</b>  | Firmicutes    | Clostridia   | 0                   | 0                    | 0                   | 0                    |
| <b>seq1284</b> | Firmicutes    | Clostridia   | 0                   | 0                    | 0                   | 0                    |
| <b>seq174</b>  | Firmicutes    | Clostridia   | 0                   | 0                    | 0                   | 0                    |
| <b>seq270</b>  | Firmicutes    | Clostridia   | 0                   | 0                    | 0                   | 0                    |
| <b>seq527</b>  | Firmicutes    | Clostridia   | 0                   | 0                    | 0                   | 0                    |
| <b>seq837</b>  | Firmicutes    | Clostridia   | 0                   | 0                    | 0                   | 0                    |
| <b>seq899</b>  | Firmicutes    | Clostridia   | 0                   | 0                    | 0                   | 0                    |
| <b>seq920</b>  | Firmicutes    | Clostridia   | 0                   | 0                    | 0                   | 0                    |
| <b>seq1090</b> | Firmicutes    | Clostridia   | 0                   | 0                    | 0                   | 0                    |
| <b>seq1123</b> | Firmicutes    | Clostridia   | 0                   | 0                    | 0                   | 0                    |
| <b>seq1397</b> | Firmicutes    | Clostridia   | 0                   | 0                    | 0                   | 0                    |
| <b>seq1513</b> | Firmicutes    | Clostridia   | 0                   | 0                    | 0                   | 0                    |
| <b>seq1553</b> | Firmicutes    | Clostridia   | 0                   | 0                    | 0                   | 0                    |
| <b>seq1827</b> | Firmicutes    | Clostridia   | 0                   | 0                    | 0                   | 0                    |
| <b>seq483</b>  | Firmicutes    | Clostridia   | 0                   | 0                    | 0                   | 0                    |
| <b>seq1154</b> | Firmicutes    | Clostridia   | 0                   | 0                    | 0                   | 0                    |
| <b>seq127</b>  | Firmicutes    | Clostridia   | 0                   | 0                    | 0                   | 0                    |
| <b>seq179</b>  | Firmicutes    | Clostridia   | 0                   | 0                    | 0                   | 0                    |
| <b>seq425</b>  | Firmicutes    | Clostridia   | 0                   | 0                    | 0                   | 0                    |

Sequence Count Table

|                | <b>Phylum</b> | <b>Class</b> | <b>Subject13WK0</b> | <b>Subject13WK12</b> | <b>Subject39WK0</b> | <b>Subject39WK12</b> |
|----------------|---------------|--------------|---------------------|----------------------|---------------------|----------------------|
| <b>seq1220</b> | Firmicutes    | Clostridia   | 0                   | 0                    | 0                   | 0                    |
| <b>seq1222</b> | Firmicutes    | Clostridia   | 0                   | 0                    | 0                   | 0                    |
| <b>seq1277</b> | Firmicutes    | Clostridia   | 0                   | 0                    | 0                   | 0                    |
| <b>seq1305</b> | Firmicutes    | Clostridia   | 0                   | 0                    | 0                   | 0                    |
| <b>seq77</b>   | Firmicutes    | Clostridia   | 300                 | 181                  | 0                   | 0                    |
| <b>seq106</b>  | Firmicutes    | Clostridia   | 0                   | 1456                 | 0                   | 0                    |
| <b>seq297</b>  | Firmicutes    | Clostridia   | 169                 | 182                  | 0                   | 0                    |
| <b>seq872</b>  | Firmicutes    | Clostridia   | 126                 | 86                   | 0                   | 0                    |
| <b>seq908</b>  | Firmicutes    | Clostridia   | 0                   | 0                    | 0                   | 0                    |
| <b>seq925</b>  | Firmicutes    | Clostridia   | 109                 | 71                   | 0                   | 0                    |
| <b>seq1181</b> | Firmicutes    | Clostridia   | 0                   | 0                    | 0                   | 0                    |
| <b>seq1333</b> | Firmicutes    | Clostridia   | 0                   | 0                    | 0                   | 0                    |
| <b>seq603</b>  | Firmicutes    | Clostridia   | 54                  | 14                   | 0                   | 0                    |
| <b>seq747</b>  | Firmicutes    | Clostridia   | 0                   | 0                    | 0                   | 0                    |
| <b>seq1284</b> | Firmicutes    | Clostridia   | 0                   | 0                    | 0                   | 0                    |
| <b>seq174</b>  | Firmicutes    | Clostridia   | 0                   | 0                    | 0                   | 23                   |
| <b>seq270</b>  | Firmicutes    | Clostridia   | 0                   | 0                    | 0                   | 0                    |
| <b>seq527</b>  | Firmicutes    | Clostridia   | 0                   | 0                    | 0                   | 0                    |
| <b>seq837</b>  | Firmicutes    | Clostridia   | 0                   | 0                    | 0                   | 0                    |
| <b>seq899</b>  | Firmicutes    | Clostridia   | 0                   | 0                    | 0                   | 0                    |
| <b>seq920</b>  | Firmicutes    | Clostridia   | 0                   | 0                    | 0                   | 0                    |
| <b>seq1090</b> | Firmicutes    | Clostridia   | 0                   | 0                    | 0                   | 0                    |
| <b>seq1123</b> | Firmicutes    | Clostridia   | 0                   | 0                    | 0                   | 0                    |
| <b>seq1397</b> | Firmicutes    | Clostridia   | 0                   | 0                    | 0                   | 0                    |
| <b>seq1513</b> | Firmicutes    | Clostridia   | 0                   | 0                    | 0                   | 0                    |
| <b>seq1553</b> | Firmicutes    | Clostridia   | 0                   | 0                    | 0                   | 0                    |
| <b>seq1827</b> | Firmicutes    | Clostridia   | 0                   | 0                    | 0                   | 0                    |
| <b>seq483</b>  | Firmicutes    | Clostridia   | 0                   | 0                    | 0                   | 0                    |
| <b>seq1154</b> | Firmicutes    | Clostridia   | 0                   | 0                    | 0                   | 0                    |
| <b>seq127</b>  | Firmicutes    | Clostridia   | 98                  | 102                  | 0                   | 0                    |
| <b>seq179</b>  | Firmicutes    | Clostridia   | 0                   | 0                    | 0                   | 0                    |
| <b>seq425</b>  | Firmicutes    | Clostridia   | 171                 | 136                  | 0                   | 91                   |

Sequence Count Table

|                | <b>Phylum</b> | <b>Class</b> | <b>Subject26WK0</b> | <b>Subject26WK12</b> | <b>Subject14WK0</b> | <b>Subject14WK12</b> |
|----------------|---------------|--------------|---------------------|----------------------|---------------------|----------------------|
| <b>seq1220</b> | Firmicutes    | Clostridia   | 0                   | 0                    | 0                   | 0                    |
| <b>seq1222</b> | Firmicutes    | Clostridia   | 0                   | 0                    | 0                   | 0                    |
| <b>seq1277</b> | Firmicutes    | Clostridia   | 0                   | 0                    | 0                   | 0                    |
| <b>seq1305</b> | Firmicutes    | Clostridia   | 0                   | 0                    | 0                   | 0                    |
| <b>seq77</b>   | Firmicutes    | Clostridia   | 318                 | 243                  | 0                   | 150                  |
| <b>seq106</b>  | Firmicutes    | Clostridia   | 315                 | 271                  | 436                 | 200                  |
| <b>seq297</b>  | Firmicutes    | Clostridia   | 0                   | 0                    | 0                   | 0                    |
| <b>seq872</b>  | Firmicutes    | Clostridia   | 0                   | 0                    | 0                   | 0                    |
| <b>seq908</b>  | Firmicutes    | Clostridia   | 0                   | 0                    | 0                   | 0                    |
| <b>seq925</b>  | Firmicutes    | Clostridia   | 0                   | 0                    | 0                   | 0                    |
| <b>seq1181</b> | Firmicutes    | Clostridia   | 0                   | 0                    | 0                   | 0                    |
| <b>seq1333</b> | Firmicutes    | Clostridia   | 0                   | 0                    | 0                   | 0                    |
| <b>seq603</b>  | Firmicutes    | Clostridia   | 0                   | 0                    | 0                   | 0                    |
| <b>seq747</b>  | Firmicutes    | Clostridia   | 0                   | 0                    | 174                 | 105                  |
| <b>seq1284</b> | Firmicutes    | Clostridia   | 0                   | 0                    | 0                   | 0                    |
| <b>seq174</b>  | Firmicutes    | Clostridia   | 249                 | 0                    | 296                 | 132                  |
| <b>seq270</b>  | Firmicutes    | Clostridia   | 0                   | 0                    | 365                 | 63                   |
| <b>seq527</b>  | Firmicutes    | Clostridia   | 0                   | 0                    | 0                   | 0                    |
| <b>seq837</b>  | Firmicutes    | Clostridia   | 0                   | 0                    | 0                   | 0                    |
| <b>seq899</b>  | Firmicutes    | Clostridia   | 0                   | 0                    | 0                   | 0                    |
| <b>seq920</b>  | Firmicutes    | Clostridia   | 0                   | 0                    | 0                   | 0                    |
| <b>seq1090</b> | Firmicutes    | Clostridia   | 0                   | 0                    | 0                   | 0                    |
| <b>seq1123</b> | Firmicutes    | Clostridia   | 0                   | 0                    | 0                   | 0                    |
| <b>seq1397</b> | Firmicutes    | Clostridia   | 0                   | 0                    | 0                   | 0                    |
| <b>seq1513</b> | Firmicutes    | Clostridia   | 0                   | 0                    | 0                   | 0                    |
| <b>seq1553</b> | Firmicutes    | Clostridia   | 0                   | 0                    | 0                   | 0                    |
| <b>seq1827</b> | Firmicutes    | Clostridia   | 0                   | 0                    | 0                   | 0                    |
| <b>seq483</b>  | Firmicutes    | Clostridia   | 0                   | 0                    | 0                   | 0                    |
| <b>seq1154</b> | Firmicutes    | Clostridia   | 0                   | 0                    | 0                   | 0                    |
| <b>seq127</b>  | Firmicutes    | Clostridia   | 63                  | 212                  | 96                  | 82                   |
| <b>seq179</b>  | Firmicutes    | Clostridia   | 0                   | 0                    | 192                 | 27                   |
| <b>seq425</b>  | Firmicutes    | Clostridia   | 0                   | 0                    | 0                   | 0                    |

Sequence Count Table

|                | <b>Phylum</b> | <b>Class</b> | <b>Subject27WK0</b> | <b>Subject27WK12</b> | <b>Subject15WK0</b> | <b>Subject15WK12</b> |
|----------------|---------------|--------------|---------------------|----------------------|---------------------|----------------------|
| <b>seq1220</b> | Firmicutes    | Clostridia   | 0                   | 0                    | 0                   | 0                    |
| <b>seq1222</b> | Firmicutes    | Clostridia   | 0                   | 0                    | 0                   | 0                    |
| <b>seq1277</b> | Firmicutes    | Clostridia   | 0                   | 0                    | 0                   | 0                    |
| <b>seq1305</b> | Firmicutes    | Clostridia   | 0                   | 0                    | 0                   | 0                    |
| <b>seq77</b>   | Firmicutes    | Clostridia   | 43                  | 167                  | 61                  | 0                    |
| <b>seq106</b>  | Firmicutes    | Clostridia   | 0                   | 75                   | 0                   | 160                  |
| <b>seq297</b>  | Firmicutes    | Clostridia   | 0                   | 54                   | 0                   | 0                    |
| <b>seq872</b>  | Firmicutes    | Clostridia   | 0                   | 0                    | 0                   | 0                    |
| <b>seq908</b>  | Firmicutes    | Clostridia   | 0                   | 0                    | 0                   | 0                    |
| <b>seq925</b>  | Firmicutes    | Clostridia   | 0                   | 0                    | 0                   | 0                    |
| <b>seq1181</b> | Firmicutes    | Clostridia   | 0                   | 0                    | 0                   | 0                    |
| <b>seq1333</b> | Firmicutes    | Clostridia   | 0                   | 0                    | 0                   | 0                    |
| <b>seq603</b>  | Firmicutes    | Clostridia   | 0                   | 0                    | 0                   | 0                    |
| <b>seq747</b>  | Firmicutes    | Clostridia   | 10                  | 0                    | 0                   | 0                    |
| <b>seq1284</b> | Firmicutes    | Clostridia   | 0                   | 0                    | 0                   | 0                    |
| <b>seq174</b>  | Firmicutes    | Clostridia   | 41                  | 120                  | 354                 | 232                  |
| <b>seq270</b>  | Firmicutes    | Clostridia   | 0                   | 0                    | 315                 | 38                   |
| <b>seq527</b>  | Firmicutes    | Clostridia   | 0                   | 0                    | 82                  | 0                    |
| <b>seq837</b>  | Firmicutes    | Clostridia   | 0                   | 0                    | 0                   | 0                    |
| <b>seq899</b>  | Firmicutes    | Clostridia   | 0                   | 0                    | 0                   | 0                    |
| <b>seq920</b>  | Firmicutes    | Clostridia   | 0                   | 0                    | 0                   | 0                    |
| <b>seq1090</b> | Firmicutes    | Clostridia   | 0                   | 0                    | 0                   | 0                    |
| <b>seq1123</b> | Firmicutes    | Clostridia   | 0                   | 0                    | 0                   | 0                    |
| <b>seq1397</b> | Firmicutes    | Clostridia   | 0                   | 0                    | 0                   | 0                    |
| <b>seq1513</b> | Firmicutes    | Clostridia   | 0                   | 0                    | 0                   | 0                    |
| <b>seq1553</b> | Firmicutes    | Clostridia   | 0                   | 0                    | 0                   | 0                    |
| <b>seq1827</b> | Firmicutes    | Clostridia   | 0                   | 0                    | 0                   | 0                    |
| <b>seq483</b>  | Firmicutes    | Clostridia   | 0                   | 236                  | 0                   | 0                    |
| <b>seq1154</b> | Firmicutes    | Clostridia   | 0                   | 0                    | 0                   | 0                    |
| <b>seq127</b>  | Firmicutes    | Clostridia   | 100                 | 416                  | 0                   | 0                    |
| <b>seq179</b>  | Firmicutes    | Clostridia   | 79                  | 24                   | 42                  | 39                   |
| <b>seq425</b>  | Firmicutes    | Clostridia   | 0                   | 0                    | 0                   | 0                    |

Sequence Count Table

|                | <b>Phylum</b> | <b>Class</b> | <b>Δ</b> |  |  |  |
|----------------|---------------|--------------|----------|--|--|--|
| <b>seq1220</b> | Firmicutes    | Clostridia   |          |  |  |  |
| <b>seq1222</b> | Firmicutes    | Clostridia   |          |  |  |  |
| <b>seq1277</b> | Firmicutes    | Clostridia   |          |  |  |  |
| <b>seq1305</b> | Firmicutes    | Clostridia   |          |  |  |  |
| <b>seq77</b>   | Firmicutes    | Clostridia   |          |  |  |  |
| <b>seq106</b>  | Firmicutes    | Clostridia   |          |  |  |  |
| <b>seq297</b>  | Firmicutes    | Clostridia   |          |  |  |  |
| <b>seq872</b>  | Firmicutes    | Clostridia   |          |  |  |  |
| <b>seq908</b>  | Firmicutes    | Clostridia   |          |  |  |  |
| <b>seq925</b>  | Firmicutes    | Clostridia   |          |  |  |  |
| <b>seq1181</b> | Firmicutes    | Clostridia   |          |  |  |  |
| <b>seq1333</b> | Firmicutes    | Clostridia   |          |  |  |  |
| <b>seq603</b>  | Firmicutes    | Clostridia   |          |  |  |  |
| <b>seq747</b>  | Firmicutes    | Clostridia   |          |  |  |  |
| <b>seq1284</b> | Firmicutes    | Clostridia   |          |  |  |  |
| <b>seq174</b>  | Firmicutes    | Clostridia   |          |  |  |  |
| <b>seq270</b>  | Firmicutes    | Clostridia   |          |  |  |  |
| <b>seq527</b>  | Firmicutes    | Clostridia   |          |  |  |  |
| <b>seq837</b>  | Firmicutes    | Clostridia   |          |  |  |  |
| <b>seq899</b>  | Firmicutes    | Clostridia   |          |  |  |  |
| <b>seq920</b>  | Firmicutes    | Clostridia   |          |  |  |  |
| <b>seq1090</b> | Firmicutes    | Clostridia   |          |  |  |  |
| <b>seq1123</b> | Firmicutes    | Clostridia   |          |  |  |  |
| <b>seq1397</b> | Firmicutes    | Clostridia   |          |  |  |  |
| <b>seq1513</b> | Firmicutes    | Clostridia   |          |  |  |  |
| <b>seq1553</b> | Firmicutes    | Clostridia   |          |  |  |  |
| <b>seq1827</b> | Firmicutes    | Clostridia   |          |  |  |  |
| <b>seq483</b>  | Firmicutes    | Clostridia   |          |  |  |  |
| <b>seq1154</b> | Firmicutes    | Clostridia   |          |  |  |  |
| <b>seq127</b>  | Firmicutes    | Clostridia   |          |  |  |  |
| <b>seq179</b>  | Firmicutes    | Clostridia   |          |  |  |  |
| <b>seq425</b>  | Firmicutes    | Clostridia   |          |  |  |  |

Sequence Count Table

|                | <b>Phylum</b> | <b>Class</b> | <b>Order</b>  | <b>Family</b>   |
|----------------|---------------|--------------|---------------|-----------------|
| <b>seq660</b>  | Firmicutes    | Clostridia   | Clostridiales | Lachnospiraceae |
| <b>seq714</b>  | Firmicutes    | Clostridia   | Clostridiales | Lachnospiraceae |
| <b>seq779</b>  | Firmicutes    | Clostridia   | Clostridiales | Lachnospiraceae |
| <b>seq911</b>  | Firmicutes    | Clostridia   | Clostridiales | Lachnospiraceae |
| <b>seq1016</b> | Firmicutes    | Clostridia   | Clostridiales | Lachnospiraceae |
| <b>seq1131</b> | Firmicutes    | Clostridia   | Clostridiales | Lachnospiraceae |
| <b>seq1541</b> | Firmicutes    | Clostridia   | Clostridiales | Lachnospiraceae |
| <b>seq949</b>  | Firmicutes    | Clostridia   | Clostridiales | Lachnospiraceae |
| <b>seq233</b>  | Firmicutes    | Clostridia   | Clostridiales | Lachnospiraceae |
| <b>seq299</b>  | Firmicutes    | Clostridia   | Clostridiales | Lachnospiraceae |
| <b>seq577</b>  | Firmicutes    | Clostridia   | Clostridiales | Lachnospiraceae |
| <b>seq672</b>  | Firmicutes    | Clostridia   | Clostridiales | Lachnospiraceae |
| <b>seq740</b>  | Firmicutes    | Clostridia   | Clostridiales | Lachnospiraceae |
| <b>seq1699</b> | Firmicutes    | Clostridia   | Clostridiales | Lachnospiraceae |
| <b>seq1768</b> | Firmicutes    | Clostridia   | Clostridiales | Lachnospiraceae |
| <b>seq212</b>  | Firmicutes    | Clostridia   | Clostridiales | Lachnospiraceae |
| <b>seq372</b>  | Firmicutes    | Clostridia   | Clostridiales | Lachnospiraceae |
| <b>seq625</b>  | Firmicutes    | Clostridia   | Clostridiales | Lachnospiraceae |
| <b>seq1055</b> | Firmicutes    | Clostridia   | Clostridiales | Lachnospiraceae |
| <b>seq27</b>   | Firmicutes    | Clostridia   | Clostridiales | Lachnospiraceae |
| <b>seq69</b>   | Firmicutes    | Clostridia   | Clostridiales | Lachnospiraceae |
| <b>seq85</b>   | Firmicutes    | Clostridia   | Clostridiales | Lachnospiraceae |
| <b>seq198</b>  | Firmicutes    | Clostridia   | Clostridiales | Lachnospiraceae |
| <b>seq204</b>  | Firmicutes    | Clostridia   | Clostridiales | Lachnospiraceae |
| <b>seq230</b>  | Firmicutes    | Clostridia   | Clostridiales | Lachnospiraceae |
| <b>seq246</b>  | Firmicutes    | Clostridia   | Clostridiales | Lachnospiraceae |
| <b>seq644</b>  | Firmicutes    | Clostridia   | Clostridiales | Lachnospiraceae |
| <b>seq926</b>  | Firmicutes    | Clostridia   | Clostridiales | Lachnospiraceae |
| <b>seq951</b>  | Firmicutes    | Clostridia   | Clostridiales | Lachnospiraceae |
| <b>seq1040</b> | Firmicutes    | Clostridia   | Clostridiales | Lachnospiraceae |
| <b>seq1072</b> | Firmicutes    | Clostridia   | Clostridiales | Lachnospiraceae |
| <b>seq1105</b> | Firmicutes    | Clostridia   | Clostridiales | Lachnospiraceae |

Sequence Count Table

|                | <b>Phylum</b> | <b>Class</b> | <b>Genus</b>            | <b>Species</b> |
|----------------|---------------|--------------|-------------------------|----------------|
| <b>seq660</b>  | Firmicutes    | Clostridia   | Lachnospiraceae_UCG-004 |                |
| <b>seq714</b>  | Firmicutes    | Clostridia   | Lachnospiraceae_UCG-004 |                |
| <b>seq779</b>  | Firmicutes    | Clostridia   | Lachnospiraceae_UCG-004 |                |
| <b>seq911</b>  | Firmicutes    | Clostridia   | Lachnospiraceae_UCG-004 |                |
| <b>seq1016</b> | Firmicutes    | Clostridia   | Lachnospiraceae_UCG-004 |                |
| <b>seq1131</b> | Firmicutes    | Clostridia   | Lachnospiraceae_UCG-004 |                |
| <b>seq1541</b> | Firmicutes    | Clostridia   | Lachnospiraceae_UCG-004 |                |
| <b>seq949</b>  | Firmicutes    | Clostridia   | Lachnospiraceae_UCG-008 |                |
| <b>seq233</b>  | Firmicutes    | Clostridia   | Lachnospiraceae_UCG-010 |                |
| <b>seq299</b>  | Firmicutes    | Clostridia   | Lachnospiraceae_UCG-010 |                |
| <b>seq577</b>  | Firmicutes    | Clostridia   | Lachnospiraceae_UCG-010 |                |
| <b>seq672</b>  | Firmicutes    | Clostridia   | Lachnospiraceae_UCG-010 |                |
| <b>seq740</b>  | Firmicutes    | Clostridia   | Lachnospiraceae_UCG-010 |                |
| <b>seq1699</b> | Firmicutes    | Clostridia   | Lachnospiraceae_UCG-010 |                |
| <b>seq1768</b> | Firmicutes    | Clostridia   | Lachnospiraceae_UCG-010 |                |
| <b>seq212</b>  | Firmicutes    | Clostridia   | Marvinbryantia          |                |
| <b>seq372</b>  | Firmicutes    | Clostridia   | Marvinbryantia          |                |
| <b>seq625</b>  | Firmicutes    | Clostridia   | Marvinbryantia          |                |
| <b>seq1055</b> | Firmicutes    | Clostridia   | Marvinbryantia          |                |
| <b>seq27</b>   | Firmicutes    | Clostridia   | Roseburia               | intestinalis   |
| <b>seq69</b>   | Firmicutes    | Clostridia   | Roseburia               | inulinivorans  |
| <b>seq85</b>   | Firmicutes    | Clostridia   | Roseburia               |                |
| <b>seq198</b>  | Firmicutes    | Clostridia   | Roseburia               | hominis        |
| <b>seq204</b>  | Firmicutes    | Clostridia   | Roseburia               |                |
| <b>seq230</b>  | Firmicutes    | Clostridia   | Roseburia               |                |
| <b>seq246</b>  | Firmicutes    | Clostridia   | Roseburia               |                |
| <b>seq644</b>  | Firmicutes    | Clostridia   | Roseburia               |                |
| <b>seq926</b>  | Firmicutes    | Clostridia   | Roseburia               |                |
| <b>seq951</b>  | Firmicutes    | Clostridia   | Roseburia               |                |
| <b>seq1040</b> | Firmicutes    | Clostridia   | Roseburia               |                |
| <b>seq1072</b> | Firmicutes    | Clostridia   | Roseburia               |                |
| <b>seq1105</b> | Firmicutes    | Clostridia   | Roseburia               |                |



Sequence Count Table

|                | <b>Phylum</b> | <b>Class</b> | <b>Subject34WK0</b> | <b>Subject34WK12</b> | <b>Subject16WK0</b> | <b>Subject16WK12</b> |
|----------------|---------------|--------------|---------------------|----------------------|---------------------|----------------------|
| <b>seq660</b>  | Firmicutes    | Clostridia   | 0                   | 0                    | 0                   | 0                    |
| <b>seq714</b>  | Firmicutes    | Clostridia   | 0                   | 122                  | 0                   | 0                    |
| <b>seq779</b>  | Firmicutes    | Clostridia   | 0                   | 0                    | 0                   | 0                    |
| <b>seq911</b>  | Firmicutes    | Clostridia   | 0                   | 0                    | 0                   | 0                    |
| <b>seq1016</b> | Firmicutes    | Clostridia   | 0                   | 0                    | 0                   | 0                    |
| <b>seq1131</b> | Firmicutes    | Clostridia   | 0                   | 0                    | 0                   | 0                    |
| <b>seq1541</b> | Firmicutes    | Clostridia   | 0                   | 0                    | 0                   | 0                    |
| <b>seq949</b>  | Firmicutes    | Clostridia   | 0                   | 0                    | 0                   | 0                    |
| <b>seq233</b>  | Firmicutes    | Clostridia   | 13                  | 188                  | 0                   | 0                    |
| <b>seq299</b>  | Firmicutes    | Clostridia   | 0                   | 22                   | 0                   | 0                    |
| <b>seq577</b>  | Firmicutes    | Clostridia   | 0                   | 0                    | 0                   | 0                    |
| <b>seq672</b>  | Firmicutes    | Clostridia   | 0                   | 0                    | 0                   | 0                    |
| <b>seq740</b>  | Firmicutes    | Clostridia   | 0                   | 0                    | 16                  | 25                   |
| <b>seq1699</b> | Firmicutes    | Clostridia   | 0                   | 0                    | 0                   | 0                    |
| <b>seq1768</b> | Firmicutes    | Clostridia   | 0                   | 0                    | 0                   | 0                    |
| <b>seq212</b>  | Firmicutes    | Clostridia   | 0                   | 49                   | 26                  | 51                   |
| <b>seq372</b>  | Firmicutes    | Clostridia   | 0                   | 33                   | 34                  | 34                   |
| <b>seq625</b>  | Firmicutes    | Clostridia   | 0                   | 0                    | 0                   | 0                    |
| <b>seq1055</b> | Firmicutes    | Clostridia   | 0                   | 0                    | 0                   | 0                    |
| <b>seq27</b>   | Firmicutes    | Clostridia   | 139                 | 766                  | 118                 | 0                    |
| <b>seq69</b>   | Firmicutes    | Clostridia   | 17                  | 692                  | 39                  | 39                   |
| <b>seq85</b>   | Firmicutes    | Clostridia   | 75                  | 0                    | 0                   | 27                   |
| <b>seq198</b>  | Firmicutes    | Clostridia   | 0                   | 85                   | 0                   | 0                    |
| <b>seq204</b>  | Firmicutes    | Clostridia   | 0                   | 0                    | 0                   | 0                    |
| <b>seq230</b>  | Firmicutes    | Clostridia   | 0                   | 0                    | 0                   | 0                    |
| <b>seq246</b>  | Firmicutes    | Clostridia   | 0                   | 0                    | 0                   | 0                    |
| <b>seq644</b>  | Firmicutes    | Clostridia   | 0                   | 0                    | 0                   | 0                    |
| <b>seq926</b>  | Firmicutes    | Clostridia   | 0                   | 0                    | 0                   | 0                    |
| <b>seq951</b>  | Firmicutes    | Clostridia   | 0                   | 0                    | 0                   | 0                    |
| <b>seq1040</b> | Firmicutes    | Clostridia   | 0                   | 128                  | 0                   | 0                    |
| <b>seq1072</b> | Firmicutes    | Clostridia   | 0                   | 0                    | 0                   | 0                    |
| <b>seq1105</b> | Firmicutes    | Clostridia   | 0                   | 0                    | 0                   | 0                    |

Sequence Count Table

|                | <b>Phylum</b> | <b>Class</b> | <b>Subject17WK0</b> | <b>Subject17WK12</b> | <b>Subject1WK0</b> | <b>Subject1WK12</b> |
|----------------|---------------|--------------|---------------------|----------------------|--------------------|---------------------|
| <b>seq660</b>  | Firmicutes    | Clostridia   | 0                   | 0                    | 0                  | 0                   |
| <b>seq714</b>  | Firmicutes    | Clostridia   | 0                   | 0                    | 63                 | 0                   |
| <b>seq779</b>  | Firmicutes    | Clostridia   | 0                   | 0                    | 0                  | 0                   |
| <b>seq911</b>  | Firmicutes    | Clostridia   | 0                   | 0                    | 0                  | 0                   |
| <b>seq1016</b> | Firmicutes    | Clostridia   | 0                   | 0                    | 0                  | 0                   |
| <b>seq1131</b> | Firmicutes    | Clostridia   | 0                   | 0                    | 0                  | 0                   |
| <b>seq1541</b> | Firmicutes    | Clostridia   | 0                   | 0                    | 0                  | 0                   |
| <b>seq949</b>  | Firmicutes    | Clostridia   | 5                   | 0                    | 0                  | 0                   |
| <b>seq233</b>  | Firmicutes    | Clostridia   | 109                 | 104                  | 0                  | 0                   |
| <b>seq299</b>  | Firmicutes    | Clostridia   | 0                   | 0                    | 175                | 147                 |
| <b>seq577</b>  | Firmicutes    | Clostridia   | 18                  | 47                   | 23                 | 36                  |
| <b>seq672</b>  | Firmicutes    | Clostridia   | 0                   | 0                    | 0                  | 0                   |
| <b>seq740</b>  | Firmicutes    | Clostridia   | 0                   | 0                    | 0                  | 0                   |
| <b>seq1699</b> | Firmicutes    | Clostridia   | 0                   | 0                    | 0                  | 0                   |
| <b>seq1768</b> | Firmicutes    | Clostridia   | 0                   | 0                    | 0                  | 0                   |
| <b>seq212</b>  | Firmicutes    | Clostridia   | 67                  | 241                  | 75                 | 63                  |
| <b>seq372</b>  | Firmicutes    | Clostridia   | 23                  | 127                  | 0                  | 0                   |
| <b>seq625</b>  | Firmicutes    | Clostridia   | 0                   | 0                    | 0                  | 0                   |
| <b>seq1055</b> | Firmicutes    | Clostridia   | 80                  | 42                   | 0                  | 0                   |
| <b>seq27</b>   | Firmicutes    | Clostridia   | 371                 | 5859                 | 2154               | 1846                |
| <b>seq69</b>   | Firmicutes    | Clostridia   | 0                   | 27                   | 321                | 263                 |
| <b>seq85</b>   | Firmicutes    | Clostridia   | 0                   | 0                    | 0                  | 0                   |
| <b>seq198</b>  | Firmicutes    | Clostridia   | 114                 | 0                    | 0                  | 0                   |
| <b>seq204</b>  | Firmicutes    | Clostridia   | 0                   | 0                    | 519                | 445                 |
| <b>seq230</b>  | Firmicutes    | Clostridia   | 0                   | 0                    | 0                  | 0                   |
| <b>seq246</b>  | Firmicutes    | Clostridia   | 0                   | 0                    | 362                | 293                 |
| <b>seq644</b>  | Firmicutes    | Clostridia   | 0                   | 0                    | 0                  | 0                   |
| <b>seq926</b>  | Firmicutes    | Clostridia   | 0                   | 0                    | 0                  | 0                   |
| <b>seq951</b>  | Firmicutes    | Clostridia   | 0                   | 0                    | 0                  | 0                   |
| <b>seq1040</b> | Firmicutes    | Clostridia   | 0                   | 0                    | 0                  | 0                   |
| <b>seq1072</b> | Firmicutes    | Clostridia   | 0                   | 0                    | 0                  | 0                   |
| <b>seq1105</b> | Firmicutes    | Clostridia   | 0                   | 0                    | 0                  | 0                   |

Sequence Count Table

|                | <b>Phylum</b> | <b>Class</b> | <b>Subject2WK0</b> | <b>Subject2WK12</b> | <b>Subject3WK0</b> | <b>Subject3WK12</b> |
|----------------|---------------|--------------|--------------------|---------------------|--------------------|---------------------|
| <b>seq660</b>  | Firmicutes    | Clostridia   | 80                 | 68                  | 0                  | 0                   |
| <b>seq714</b>  | Firmicutes    | Clostridia   | 0                  | 0                   | 0                  | 0                   |
| <b>seq779</b>  | Firmicutes    | Clostridia   | 0                  | 0                   | 0                  | 0                   |
| <b>seq911</b>  | Firmicutes    | Clostridia   | 0                  | 0                   | 0                  | 188                 |
| <b>seq1016</b> | Firmicutes    | Clostridia   | 74                 | 63                  | 0                  | 0                   |
| <b>seq1131</b> | Firmicutes    | Clostridia   | 0                  | 0                   | 0                  | 0                   |
| <b>seq1541</b> | Firmicutes    | Clostridia   | 0                  | 0                   | 0                  | 0                   |
| <b>seq949</b>  | Firmicutes    | Clostridia   | 0                  | 0                   | 0                  | 0                   |
| <b>seq233</b>  | Firmicutes    | Clostridia   | 178                | 268                 | 0                  | 0                   |
| <b>seq299</b>  | Firmicutes    | Clostridia   | 0                  | 0                   | 97                 | 27                  |
| <b>seq577</b>  | Firmicutes    | Clostridia   | 0                  | 0                   | 0                  | 0                   |
| <b>seq672</b>  | Firmicutes    | Clostridia   | 0                  | 0                   | 0                  | 0                   |
| <b>seq740</b>  | Firmicutes    | Clostridia   | 0                  | 0                   | 0                  | 0                   |
| <b>seq1699</b> | Firmicutes    | Clostridia   | 0                  | 0                   | 0                  | 0                   |
| <b>seq1768</b> | Firmicutes    | Clostridia   | 0                  | 0                   | 0                  | 0                   |
| <b>seq212</b>  | Firmicutes    | Clostridia   | 31                 | 36                  | 506                | 140                 |
| <b>seq372</b>  | Firmicutes    | Clostridia   | 0                  | 0                   | 0                  | 0                   |
| <b>seq625</b>  | Firmicutes    | Clostridia   | 0                  | 0                   | 225                | 0                   |
| <b>seq1055</b> | Firmicutes    | Clostridia   | 0                  | 0                   | 0                  | 0                   |
| <b>seq27</b>   | Firmicutes    | Clostridia   | 341                | 190                 | 12104              | 1299                |
| <b>seq69</b>   | Firmicutes    | Clostridia   | 138                | 88                  | 247                | 648                 |
| <b>seq85</b>   | Firmicutes    | Clostridia   | 0                  | 0                   | 130                | 0                   |
| <b>seq198</b>  | Firmicutes    | Clostridia   | 403                | 0                   | 0                  | 86                  |
| <b>seq204</b>  | Firmicutes    | Clostridia   | 0                  | 0                   | 3492               | 389                 |
| <b>seq230</b>  | Firmicutes    | Clostridia   | 0                  | 0                   | 3541               | 417                 |
| <b>seq246</b>  | Firmicutes    | Clostridia   | 0                  | 0                   | 2463               | 350                 |
| <b>seq644</b>  | Firmicutes    | Clostridia   | 0                  | 0                   | 0                  | 0                   |
| <b>seq926</b>  | Firmicutes    | Clostridia   | 0                  | 0                   | 0                  | 0                   |
| <b>seq951</b>  | Firmicutes    | Clostridia   | 0                  | 0                   | 53                 | 111                 |
| <b>seq1040</b> | Firmicutes    | Clostridia   | 0                  | 0                   | 0                  | 0                   |
| <b>seq1072</b> | Firmicutes    | Clostridia   | 0                  | 0                   | 0                  | 0                   |
| <b>seq1105</b> | Firmicutes    | Clostridia   | 0                  | 0                   | 0                  | 0                   |

Sequence Count Table

|                | <b>Phylum</b> | <b>Class</b> | <b>Subject4WK0</b> | <b>Subject4WK12</b> | <b>Subject5WK0</b> | <b>Subject5WK12</b> |
|----------------|---------------|--------------|--------------------|---------------------|--------------------|---------------------|
| <b>seq660</b>  | Firmicutes    | Clostridia   | 0                  | 0                   | 0                  | 0                   |
| <b>seq714</b>  | Firmicutes    | Clostridia   | 0                  | 0                   | 0                  | 0                   |
| <b>seq779</b>  | Firmicutes    | Clostridia   | 0                  | 0                   | 0                  | 0                   |
| <b>seq911</b>  | Firmicutes    | Clostridia   | 0                  | 0                   | 0                  | 0                   |
| <b>seq1016</b> | Firmicutes    | Clostridia   | 0                  | 0                   | 0                  | 0                   |
| <b>seq1131</b> | Firmicutes    | Clostridia   | 0                  | 0                   | 0                  | 0                   |
| <b>seq1541</b> | Firmicutes    | Clostridia   | 0                  | 0                   | 0                  | 0                   |
| <b>seq949</b>  | Firmicutes    | Clostridia   | 0                  | 0                   | 0                  | 0                   |
| <b>seq233</b>  | Firmicutes    | Clostridia   | 0                  | 0                   | 0                  | 0                   |
| <b>seq299</b>  | Firmicutes    | Clostridia   | 0                  | 0                   | 70                 | 56                  |
| <b>seq577</b>  | Firmicutes    | Clostridia   | 0                  | 22                  | 23                 | 12                  |
| <b>seq672</b>  | Firmicutes    | Clostridia   | 0                  | 0                   | 0                  | 0                   |
| <b>seq740</b>  | Firmicutes    | Clostridia   | 0                  | 0                   | 0                  | 0                   |
| <b>seq1699</b> | Firmicutes    | Clostridia   | 0                  | 0                   | 0                  | 0                   |
| <b>seq1768</b> | Firmicutes    | Clostridia   | 0                  | 0                   | 0                  | 0                   |
| <b>seq212</b>  | Firmicutes    | Clostridia   | 214                | 75                  | 0                  | 0                   |
| <b>seq372</b>  | Firmicutes    | Clostridia   | 0                  | 0                   | 0                  | 0                   |
| <b>seq625</b>  | Firmicutes    | Clostridia   | 0                  | 0                   | 0                  | 0                   |
| <b>seq1055</b> | Firmicutes    | Clostridia   | 0                  | 0                   | 0                  | 0                   |
| <b>seq27</b>   | Firmicutes    | Clostridia   | 133                | 317                 | 830                | 735                 |
| <b>seq69</b>   | Firmicutes    | Clostridia   | 140                | 721                 | 1103               | 1647                |
| <b>seq85</b>   | Firmicutes    | Clostridia   | 0                  | 151                 | 0                  | 0                   |
| <b>seq198</b>  | Firmicutes    | Clostridia   | 65                 | 0                   | 0                  | 0                   |
| <b>seq204</b>  | Firmicutes    | Clostridia   | 0                  | 0                   | 0                  | 0                   |
| <b>seq230</b>  | Firmicutes    | Clostridia   | 0                  | 0                   | 0                  | 0                   |
| <b>seq246</b>  | Firmicutes    | Clostridia   | 0                  | 0                   | 0                  | 0                   |
| <b>seq644</b>  | Firmicutes    | Clostridia   | 0                  | 0                   | 0                  | 0                   |
| <b>seq926</b>  | Firmicutes    | Clostridia   | 0                  | 0                   | 0                  | 0                   |
| <b>seq951</b>  | Firmicutes    | Clostridia   | 0                  | 0                   | 0                  | 0                   |
| <b>seq1040</b> | Firmicutes    | Clostridia   | 0                  | 0                   | 0                  | 0                   |
| <b>seq1072</b> | Firmicutes    | Clostridia   | 0                  | 0                   | 0                  | 0                   |
| <b>seq1105</b> | Firmicutes    | Clostridia   | 0                  | 0                   | 0                  | 0                   |

Sequence Count Table

|                | <b>Phylum</b> | <b>Class</b> | <b>Subject6WK0</b> | <b>Subject6WK12</b> | <b>Subject18WK0</b> | <b>Subject18WK12</b> |
|----------------|---------------|--------------|--------------------|---------------------|---------------------|----------------------|
| <b>seq660</b>  | Firmicutes    | Clostridia   | 0                  | 0                   | 0                   | 0                    |
| <b>seq714</b>  | Firmicutes    | Clostridia   | 0                  | 0                   | 0                   | 0                    |
| <b>seq779</b>  | Firmicutes    | Clostridia   | 0                  | 0                   | 0                   | 0                    |
| <b>seq911</b>  | Firmicutes    | Clostridia   | 0                  | 0                   | 0                   | 0                    |
| <b>seq1016</b> | Firmicutes    | Clostridia   | 0                  | 0                   | 0                   | 0                    |
| <b>seq1131</b> | Firmicutes    | Clostridia   | 0                  | 0                   | 0                   | 0                    |
| <b>seq1541</b> | Firmicutes    | Clostridia   | 0                  | 0                   | 0                   | 0                    |
| <b>seq949</b>  | Firmicutes    | Clostridia   | 14                 | 26                  | 0                   | 0                    |
| <b>seq233</b>  | Firmicutes    | Clostridia   | 58                 | 137                 | 0                   | 0                    |
| <b>seq299</b>  | Firmicutes    | Clostridia   | 0                  | 0                   | 0                   | 0                    |
| <b>seq577</b>  | Firmicutes    | Clostridia   | 0                  | 0                   | 0                   | 17                   |
| <b>seq672</b>  | Firmicutes    | Clostridia   | 0                  | 0                   | 77                  | 0                    |
| <b>seq740</b>  | Firmicutes    | Clostridia   | 29                 | 27                  | 0                   | 0                    |
| <b>seq1699</b> | Firmicutes    | Clostridia   | 0                  | 0                   | 0                   | 0                    |
| <b>seq1768</b> | Firmicutes    | Clostridia   | 0                  | 0                   | 0                   | 0                    |
| <b>seq212</b>  | Firmicutes    | Clostridia   | 190                | 231                 | 0                   | 0                    |
| <b>seq372</b>  | Firmicutes    | Clostridia   | 84                 | 91                  | 0                   | 0                    |
| <b>seq625</b>  | Firmicutes    | Clostridia   | 0                  | 0                   | 0                   | 0                    |
| <b>seq1055</b> | Firmicutes    | Clostridia   | 0                  | 0                   | 0                   | 0                    |
| <b>seq27</b>   | Firmicutes    | Clostridia   | 0                  | 0                   | 2592                | 0                    |
| <b>seq69</b>   | Firmicutes    | Clostridia   | 762                | 205                 | 211                 | 0                    |
| <b>seq85</b>   | Firmicutes    | Clostridia   | 0                  | 0                   | 0                   | 0                    |
| <b>seq198</b>  | Firmicutes    | Clostridia   | 178                | 129                 | 0                   | 0                    |
| <b>seq204</b>  | Firmicutes    | Clostridia   | 0                  | 0                   | 0                   | 0                    |
| <b>seq230</b>  | Firmicutes    | Clostridia   | 0                  | 0                   | 0                   | 0                    |
| <b>seq246</b>  | Firmicutes    | Clostridia   | 0                  | 0                   | 0                   | 0                    |
| <b>seq644</b>  | Firmicutes    | Clostridia   | 0                  | 0                   | 0                   | 0                    |
| <b>seq926</b>  | Firmicutes    | Clostridia   | 0                  | 0                   | 0                   | 0                    |
| <b>seq951</b>  | Firmicutes    | Clostridia   | 0                  | 0                   | 0                   | 0                    |
| <b>seq1040</b> | Firmicutes    | Clostridia   | 0                  | 0                   | 0                   | 0                    |
| <b>seq1072</b> | Firmicutes    | Clostridia   | 0                  | 0                   | 0                   | 0                    |
| <b>seq1105</b> | Firmicutes    | Clostridia   | 0                  | 0                   | 0                   | 0                    |

Sequence Count Table

|                | <b>Phylum</b> | <b>Class</b> | <b>Subject19WK0</b> | <b>Subject19WK12</b> | <b>Subject20WK0</b> | <b>Subject20WK12</b> |
|----------------|---------------|--------------|---------------------|----------------------|---------------------|----------------------|
| <b>seq660</b>  | Firmicutes    | Clostridia   | 0                   | 0                    | 0                   | 0                    |
| <b>seq714</b>  | Firmicutes    | Clostridia   | 0                   | 0                    | 0                   | 0                    |
| <b>seq779</b>  | Firmicutes    | Clostridia   | 0                   | 0                    | 0                   | 0                    |
| <b>seq911</b>  | Firmicutes    | Clostridia   | 0                   | 0                    | 0                   | 0                    |
| <b>seq1016</b> | Firmicutes    | Clostridia   | 0                   | 0                    | 0                   | 0                    |
| <b>seq1131</b> | Firmicutes    | Clostridia   | 0                   | 0                    | 0                   | 0                    |
| <b>seq1541</b> | Firmicutes    | Clostridia   | 0                   | 0                    | 0                   | 0                    |
| <b>seq949</b>  | Firmicutes    | Clostridia   | 0                   | 0                    | 18                  | 15                   |
| <b>seq233</b>  | Firmicutes    | Clostridia   | 0                   | 0                    | 0                   | 199                  |
| <b>seq299</b>  | Firmicutes    | Clostridia   | 0                   | 0                    | 0                   | 0                    |
| <b>seq577</b>  | Firmicutes    | Clostridia   | 0                   | 0                    | 35                  | 26                   |
| <b>seq672</b>  | Firmicutes    | Clostridia   | 0                   | 0                    | 0                   | 0                    |
| <b>seq740</b>  | Firmicutes    | Clostridia   | 0                   | 0                    | 0                   | 0                    |
| <b>seq1699</b> | Firmicutes    | Clostridia   | 0                   | 0                    | 0                   | 0                    |
| <b>seq1768</b> | Firmicutes    | Clostridia   | 0                   | 0                    | 4                   | 0                    |
| <b>seq212</b>  | Firmicutes    | Clostridia   | 54                  | 104                  | 144                 | 71                   |
| <b>seq372</b>  | Firmicutes    | Clostridia   | 7                   | 10                   | 98                  | 144                  |
| <b>seq625</b>  | Firmicutes    | Clostridia   | 0                   | 59                   | 0                   | 0                    |
| <b>seq1055</b> | Firmicutes    | Clostridia   | 0                   | 0                    | 0                   | 0                    |
| <b>seq27</b>   | Firmicutes    | Clostridia   | 1286                | 909                  | 87                  | 0                    |
| <b>seq69</b>   | Firmicutes    | Clostridia   | 665                 | 443                  | 184                 | 1267                 |
| <b>seq85</b>   | Firmicutes    | Clostridia   | 0                   | 0                    | 1241                | 9349                 |
| <b>seq198</b>  | Firmicutes    | Clostridia   | 202                 | 79                   | 0                   | 0                    |
| <b>seq204</b>  | Firmicutes    | Clostridia   | 0                   | 0                    | 0                   | 0                    |
| <b>seq230</b>  | Firmicutes    | Clostridia   | 0                   | 0                    | 0                   | 0                    |
| <b>seq246</b>  | Firmicutes    | Clostridia   | 0                   | 0                    | 0                   | 0                    |
| <b>seq644</b>  | Firmicutes    | Clostridia   | 0                   | 0                    | 0                   | 0                    |
| <b>seq926</b>  | Firmicutes    | Clostridia   | 0                   | 0                    | 0                   | 0                    |
| <b>seq951</b>  | Firmicutes    | Clostridia   | 0                   | 0                    | 0                   | 0                    |
| <b>seq1040</b> | Firmicutes    | Clostridia   | 0                   | 0                    | 0                   | 0                    |
| <b>seq1072</b> | Firmicutes    | Clostridia   | 0                   | 0                    | 8                   | 106                  |
| <b>seq1105</b> | Firmicutes    | Clostridia   | 0                   | 0                    | 0                   | 0                    |

Sequence Count Table

|                | <b>Phylum</b> | <b>Class</b> | <b>Subject7WK0</b> | <b>Subject7WK12</b> | <b>Subject21WK0</b> | <b>Subject21WK12</b> |
|----------------|---------------|--------------|--------------------|---------------------|---------------------|----------------------|
| <b>seq660</b>  | Firmicutes    | Clostridia   | 0                  | 0                   | 0                   | 0                    |
| <b>seq714</b>  | Firmicutes    | Clostridia   | 0                  | 0                   | 0                   | 0                    |
| <b>seq779</b>  | Firmicutes    | Clostridia   | 0                  | 0                   | 0                   | 0                    |
| <b>seq911</b>  | Firmicutes    | Clostridia   | 0                  | 0                   | 0                   | 0                    |
| <b>seq1016</b> | Firmicutes    | Clostridia   | 0                  | 0                   | 0                   | 0                    |
| <b>seq1131</b> | Firmicutes    | Clostridia   | 0                  | 0                   | 0                   | 0                    |
| <b>seq1541</b> | Firmicutes    | Clostridia   | 0                  | 0                   | 0                   | 0                    |
| <b>seq949</b>  | Firmicutes    | Clostridia   | 0                  | 0                   | 0                   | 0                    |
| <b>seq233</b>  | Firmicutes    | Clostridia   | 0                  | 0                   | 0                   | 0                    |
| <b>seq299</b>  | Firmicutes    | Clostridia   | 0                  | 0                   | 0                   | 0                    |
| <b>seq577</b>  | Firmicutes    | Clostridia   | 19                 | 18                  | 0                   | 0                    |
| <b>seq672</b>  | Firmicutes    | Clostridia   | 87                 | 31                  | 0                   | 121                  |
| <b>seq740</b>  | Firmicutes    | Clostridia   | 0                  | 0                   | 0                   | 0                    |
| <b>seq1699</b> | Firmicutes    | Clostridia   | 0                  | 0                   | 0                   | 0                    |
| <b>seq1768</b> | Firmicutes    | Clostridia   | 0                  | 0                   | 0                   | 0                    |
| <b>seq212</b>  | Firmicutes    | Clostridia   | 0                  | 0                   | 458                 | 0                    |
| <b>seq372</b>  | Firmicutes    | Clostridia   | 0                  | 0                   | 0                   | 0                    |
| <b>seq625</b>  | Firmicutes    | Clostridia   | 0                  | 0                   | 0                   | 0                    |
| <b>seq1055</b> | Firmicutes    | Clostridia   | 0                  | 0                   | 0                   | 0                    |
| <b>seq27</b>   | Firmicutes    | Clostridia   | 221                | 0                   | 0                   | 0                    |
| <b>seq69</b>   | Firmicutes    | Clostridia   | 341                | 206                 | 0                   | 0                    |
| <b>seq85</b>   | Firmicutes    | Clostridia   | 21                 | 437                 | 0                   | 0                    |
| <b>seq198</b>  | Firmicutes    | Clostridia   | 0                  | 0                   | 269                 | 596                  |
| <b>seq204</b>  | Firmicutes    | Clostridia   | 0                  | 0                   | 0                   | 0                    |
| <b>seq230</b>  | Firmicutes    | Clostridia   | 0                  | 0                   | 0                   | 0                    |
| <b>seq246</b>  | Firmicutes    | Clostridia   | 0                  | 0                   | 0                   | 0                    |
| <b>seq644</b>  | Firmicutes    | Clostridia   | 0                  | 0                   | 0                   | 0                    |
| <b>seq926</b>  | Firmicutes    | Clostridia   | 0                  | 0                   | 0                   | 0                    |
| <b>seq951</b>  | Firmicutes    | Clostridia   | 0                  | 0                   | 0                   | 0                    |
| <b>seq1040</b> | Firmicutes    | Clostridia   | 0                  | 0                   | 0                   | 0                    |
| <b>seq1072</b> | Firmicutes    | Clostridia   | 0                  | 0                   | 0                   | 0                    |
| <b>seq1105</b> | Firmicutes    | Clostridia   | 0                  | 0                   | 0                   | 0                    |

Sequence Count Table

|                | <b>Phylum</b> | <b>Class</b> | <b>Subject8WK0</b> | <b>Subject8WK12</b> | <b>Subject9WK0</b> | <b>Subject9WK12</b> |
|----------------|---------------|--------------|--------------------|---------------------|--------------------|---------------------|
| <b>seq660</b>  | Firmicutes    | Clostridia   | 0                  | 0                   | 0                  | 0                   |
| <b>seq714</b>  | Firmicutes    | Clostridia   | 0                  | 0                   | 0                  | 0                   |
| <b>seq779</b>  | Firmicutes    | Clostridia   | 0                  | 0                   | 0                  | 0                   |
| <b>seq911</b>  | Firmicutes    | Clostridia   | 0                  | 0                   | 0                  | 0                   |
| <b>seq1016</b> | Firmicutes    | Clostridia   | 0                  | 0                   | 0                  | 0                   |
| <b>seq1131</b> | Firmicutes    | Clostridia   | 0                  | 0                   | 0                  | 98                  |
| <b>seq1541</b> | Firmicutes    | Clostridia   | 0                  | 0                   | 0                  | 0                   |
| <b>seq949</b>  | Firmicutes    | Clostridia   | 10                 | 22                  | 0                  | 0                   |
| <b>seq233</b>  | Firmicutes    | Clostridia   | 126                | 580                 | 182                | 216                 |
| <b>seq299</b>  | Firmicutes    | Clostridia   | 84                 | 146                 | 94                 | 164                 |
| <b>seq577</b>  | Firmicutes    | Clostridia   | 0                  | 0                   | 0                  | 18                  |
| <b>seq672</b>  | Firmicutes    | Clostridia   | 0                  | 0                   | 0                  | 0                   |
| <b>seq740</b>  | Firmicutes    | Clostridia   | 41                 | 38                  | 0                  | 0                   |
| <b>seq1699</b> | Firmicutes    | Clostridia   | 0                  | 0                   | 0                  | 0                   |
| <b>seq1768</b> | Firmicutes    | Clostridia   | 0                  | 0                   | 0                  | 0                   |
| <b>seq212</b>  | Firmicutes    | Clostridia   | 48                 | 0                   | 0                  | 0                   |
| <b>seq372</b>  | Firmicutes    | Clostridia   | 0                  | 0                   | 0                  | 0                   |
| <b>seq625</b>  | Firmicutes    | Clostridia   | 0                  | 67                  | 0                  | 0                   |
| <b>seq1055</b> | Firmicutes    | Clostridia   | 0                  | 0                   | 0                  | 0                   |
| <b>seq27</b>   | Firmicutes    | Clostridia   | 1075               | 381                 | 1208               | 265                 |
| <b>seq69</b>   | Firmicutes    | Clostridia   | 0                  | 0                   | 22                 | 176                 |
| <b>seq85</b>   | Firmicutes    | Clostridia   | 0                  | 0                   | 0                  | 0                   |
| <b>seq198</b>  | Firmicutes    | Clostridia   | 270                | 0                   | 0                  | 0                   |
| <b>seq204</b>  | Firmicutes    | Clostridia   | 0                  | 0                   | 0                  | 0                   |
| <b>seq230</b>  | Firmicutes    | Clostridia   | 0                  | 0                   | 0                  | 0                   |
| <b>seq246</b>  | Firmicutes    | Clostridia   | 0                  | 0                   | 0                  | 0                   |
| <b>seq644</b>  | Firmicutes    | Clostridia   | 0                  | 0                   | 0                  | 0                   |
| <b>seq926</b>  | Firmicutes    | Clostridia   | 0                  | 0                   | 0                  | 0                   |
| <b>seq951</b>  | Firmicutes    | Clostridia   | 0                  | 0                   | 0                  | 0                   |
| <b>seq1040</b> | Firmicutes    | Clostridia   | 0                  | 0                   | 0                  | 0                   |
| <b>seq1072</b> | Firmicutes    | Clostridia   | 0                  | 0                   | 0                  | 0                   |
| <b>seq1105</b> | Firmicutes    | Clostridia   | 104                | 0                   | 0                  | 0                   |



Sequence Count Table

|                | <b>Phylum</b> | <b>Class</b> | <b>Subject10WK0</b> | <b>Subject10WK12</b> | <b>Subject22WK0</b> | <b>Subject22WK12</b> |
|----------------|---------------|--------------|---------------------|----------------------|---------------------|----------------------|
| <b>seq660</b>  | Firmicutes    | Clostridia   | 188                 | 110                  | 0                   | 0                    |
| <b>seq714</b>  | Firmicutes    | Clostridia   | 0                   | 0                    | 0                   | 0                    |
| <b>seq779</b>  | Firmicutes    | Clostridia   | 0                   | 0                    | 0                   | 0                    |
| <b>seq911</b>  | Firmicutes    | Clostridia   | 0                   | 0                    | 0                   | 0                    |
| <b>seq1016</b> | Firmicutes    | Clostridia   | 0                   | 0                    | 0                   | 0                    |
| <b>seq1131</b> | Firmicutes    | Clostridia   | 0                   | 0                    | 0                   | 0                    |
| <b>seq1541</b> | Firmicutes    | Clostridia   | 0                   | 0                    | 0                   | 0                    |
| <b>seq949</b>  | Firmicutes    | Clostridia   | 0                   | 0                    | 0                   | 0                    |
| <b>seq233</b>  | Firmicutes    | Clostridia   | 0                   | 0                    | 0                   | 0                    |
| <b>seq299</b>  | Firmicutes    | Clostridia   | 113                 | 37                   | 0                   | 0                    |
| <b>seq577</b>  | Firmicutes    | Clostridia   | 53                  | 73                   | 22                  | 27                   |
| <b>seq672</b>  | Firmicutes    | Clostridia   | 0                   | 0                    | 55                  | 34                   |
| <b>seq740</b>  | Firmicutes    | Clostridia   | 0                   | 0                    | 0                   | 0                    |
| <b>seq1699</b> | Firmicutes    | Clostridia   | 0                   | 0                    | 0                   | 13                   |
| <b>seq1768</b> | Firmicutes    | Clostridia   | 0                   | 0                    | 5                   | 0                    |
| <b>seq212</b>  | Firmicutes    | Clostridia   | 0                   | 0                    | 184                 | 143                  |
| <b>seq372</b>  | Firmicutes    | Clostridia   | 0                   | 0                    | 0                   | 0                    |
| <b>seq625</b>  | Firmicutes    | Clostridia   | 0                   | 0                    | 0                   | 0                    |
| <b>seq1055</b> | Firmicutes    | Clostridia   | 0                   | 0                    | 0                   | 0                    |
| <b>seq27</b>   | Firmicutes    | Clostridia   | 3336                | 2608                 | 240                 | 153                  |
| <b>seq69</b>   | Firmicutes    | Clostridia   | 0                   | 0                    | 154                 | 149                  |
| <b>seq85</b>   | Firmicutes    | Clostridia   | 0                   | 0                    | 590                 | 558                  |
| <b>seq198</b>  | Firmicutes    | Clostridia   | 0                   | 0                    | 218                 | 151                  |
| <b>seq204</b>  | Firmicutes    | Clostridia   | 0                   | 0                    | 0                   | 0                    |
| <b>seq230</b>  | Firmicutes    | Clostridia   | 0                   | 0                    | 0                   | 0                    |
| <b>seq246</b>  | Firmicutes    | Clostridia   | 0                   | 0                    | 0                   | 0                    |
| <b>seq644</b>  | Firmicutes    | Clostridia   | 0                   | 0                    | 0                   | 0                    |
| <b>seq926</b>  | Firmicutes    | Clostridia   | 0                   | 0                    | 0                   | 0                    |
| <b>seq951</b>  | Firmicutes    | Clostridia   | 0                   | 0                    | 0                   | 0                    |
| <b>seq1040</b> | Firmicutes    | Clostridia   | 0                   | 0                    | 0                   | 0                    |
| <b>seq1072</b> | Firmicutes    | Clostridia   | 0                   | 0                    | 0                   | 0                    |
| <b>seq1105</b> | Firmicutes    | Clostridia   | 0                   | 0                    | 0                   | 0                    |

Sequence Count Table

|                | <b>Phylum</b> | <b>Class</b> | <b>Subject23WK0</b> | <b>Subject23WK12</b> | <b>Subject24WK0</b> | <b>Subject24WK12</b> |
|----------------|---------------|--------------|---------------------|----------------------|---------------------|----------------------|
| <b>seq660</b>  | Firmicutes    | Clostridia   | 0                   | 0                    | 0                   | 0                    |
| <b>seq714</b>  | Firmicutes    | Clostridia   | 0                   | 0                    | 0                   | 0                    |
| <b>seq779</b>  | Firmicutes    | Clostridia   | 0                   | 0                    | 0                   | 0                    |
| <b>seq911</b>  | Firmicutes    | Clostridia   | 0                   | 0                    | 0                   | 0                    |
| <b>seq1016</b> | Firmicutes    | Clostridia   | 0                   | 0                    | 0                   | 0                    |
| <b>seq1131</b> | Firmicutes    | Clostridia   | 0                   | 0                    | 0                   | 0                    |
| <b>seq1541</b> | Firmicutes    | Clostridia   | 0                   | 0                    | 25                  | 0                    |
| <b>seq949</b>  | Firmicutes    | Clostridia   | 0                   | 0                    | 24                  | 14                   |
| <b>seq233</b>  | Firmicutes    | Clostridia   | 0                   | 0                    | 0                   | 0                    |
| <b>seq299</b>  | Firmicutes    | Clostridia   | 0                   | 0                    | 0                   | 0                    |
| <b>seq577</b>  | Firmicutes    | Clostridia   | 0                   | 0                    | 21                  | 30                   |
| <b>seq672</b>  | Firmicutes    | Clostridia   | 0                   | 0                    | 0                   | 16                   |
| <b>seq740</b>  | Firmicutes    | Clostridia   | 25                  | 47                   | 0                   | 0                    |
| <b>seq1699</b> | Firmicutes    | Clostridia   | 0                   | 0                    | 0                   | 0                    |
| <b>seq1768</b> | Firmicutes    | Clostridia   | 0                   | 0                    | 0                   | 0                    |
| <b>seq212</b>  | Firmicutes    | Clostridia   | 54                  | 72                   | 82                  | 122                  |
| <b>seq372</b>  | Firmicutes    | Clostridia   | 138                 | 112                  | 59                  | 64                   |
| <b>seq625</b>  | Firmicutes    | Clostridia   | 0                   | 0                    | 0                   | 0                    |
| <b>seq1055</b> | Firmicutes    | Clostridia   | 0                   | 0                    | 0                   | 0                    |
| <b>seq27</b>   | Firmicutes    | Clostridia   | 831                 | 1097                 | 3119                | 494                  |
| <b>seq69</b>   | Firmicutes    | Clostridia   | 256                 | 154                  | 1514                | 245                  |
| <b>seq85</b>   | Firmicutes    | Clostridia   | 108                 | 80                   | 1707                | 1638                 |
| <b>seq198</b>  | Firmicutes    | Clostridia   | 102                 | 194                  | 78                  | 58                   |
| <b>seq204</b>  | Firmicutes    | Clostridia   | 0                   | 0                    | 0                   | 0                    |
| <b>seq230</b>  | Firmicutes    | Clostridia   | 0                   | 0                    | 0                   | 0                    |
| <b>seq246</b>  | Firmicutes    | Clostridia   | 0                   | 0                    | 0                   | 0                    |
| <b>seq644</b>  | Firmicutes    | Clostridia   | 0                   | 0                    | 0                   | 0                    |
| <b>seq926</b>  | Firmicutes    | Clostridia   | 0                   | 0                    | 179                 | 0                    |
| <b>seq951</b>  | Firmicutes    | Clostridia   | 0                   | 0                    | 0                   | 0                    |
| <b>seq1040</b> | Firmicutes    | Clostridia   | 0                   | 0                    | 0                   | 0                    |
| <b>seq1072</b> | Firmicutes    | Clostridia   | 0                   | 0                    | 0                   | 0                    |
| <b>seq1105</b> | Firmicutes    | Clostridia   | 0                   | 0                    | 0                   | 0                    |

Sequence Count Table

|                | <b>Phylum</b> | <b>Class</b> | <b>Subject11WK0</b> | <b>Subject11WK12</b> | <b>Subject12WK0</b> | <b>Subject12WK12</b> |
|----------------|---------------|--------------|---------------------|----------------------|---------------------|----------------------|
| <b>seq660</b>  | Firmicutes    | Clostridia   | 0                   | 0                    | 0                   | 0                    |
| <b>seq714</b>  | Firmicutes    | Clostridia   | 0                   | 0                    | 0                   | 0                    |
| <b>seq779</b>  | Firmicutes    | Clostridia   | 68                  | 219                  | 0                   | 0                    |
| <b>seq911</b>  | Firmicutes    | Clostridia   | 0                   | 0                    | 0                   | 0                    |
| <b>seq1016</b> | Firmicutes    | Clostridia   | 0                   | 0                    | 0                   | 0                    |
| <b>seq1131</b> | Firmicutes    | Clostridia   | 0                   | 0                    | 0                   | 0                    |
| <b>seq1541</b> | Firmicutes    | Clostridia   | 0                   | 0                    | 0                   | 0                    |
| <b>seq949</b>  | Firmicutes    | Clostridia   | 0                   | 0                    | 0                   | 0                    |
| <b>seq233</b>  | Firmicutes    | Clostridia   | 0                   | 0                    | 23                  | 152                  |
| <b>seq299</b>  | Firmicutes    | Clostridia   | 71                  | 11                   | 0                   | 0                    |
| <b>seq577</b>  | Firmicutes    | Clostridia   | 0                   | 0                    | 0                   | 0                    |
| <b>seq672</b>  | Firmicutes    | Clostridia   | 0                   | 0                    | 0                   | 0                    |
| <b>seq740</b>  | Firmicutes    | Clostridia   | 0                   | 0                    | 0                   | 56                   |
| <b>seq1699</b> | Firmicutes    | Clostridia   | 0                   | 0                    | 0                   | 0                    |
| <b>seq1768</b> | Firmicutes    | Clostridia   | 0                   | 0                    | 0                   | 0                    |
| <b>seq212</b>  | Firmicutes    | Clostridia   | 0                   | 0                    | 52                  | 79                   |
| <b>seq372</b>  | Firmicutes    | Clostridia   | 0                   | 0                    | 0                   | 5                    |
| <b>seq625</b>  | Firmicutes    | Clostridia   | 0                   | 0                    | 0                   | 0                    |
| <b>seq1055</b> | Firmicutes    | Clostridia   | 0                   | 0                    | 0                   | 0                    |
| <b>seq27</b>   | Firmicutes    | Clostridia   | 2182                | 2185                 | 482                 | 0                    |
| <b>seq69</b>   | Firmicutes    | Clostridia   | 235                 | 282                  | 412                 | 450                  |
| <b>seq85</b>   | Firmicutes    | Clostridia   | 0                   | 0                    | 0                   | 0                    |
| <b>seq198</b>  | Firmicutes    | Clostridia   | 0                   | 0                    | 105                 | 43                   |
| <b>seq204</b>  | Firmicutes    | Clostridia   | 0                   | 0                    | 102                 | 0                    |
| <b>seq230</b>  | Firmicutes    | Clostridia   | 0                   | 0                    | 0                   | 0                    |
| <b>seq246</b>  | Firmicutes    | Clostridia   | 0                   | 0                    | 0                   | 0                    |
| <b>seq644</b>  | Firmicutes    | Clostridia   | 0                   | 0                    | 0                   | 0                    |
| <b>seq926</b>  | Firmicutes    | Clostridia   | 0                   | 0                    | 0                   | 0                    |
| <b>seq951</b>  | Firmicutes    | Clostridia   | 0                   | 0                    | 0                   | 0                    |
| <b>seq1040</b> | Firmicutes    | Clostridia   | 0                   | 0                    | 0                   | 0                    |
| <b>seq1072</b> | Firmicutes    | Clostridia   | 0                   | 0                    | 0                   | 0                    |
| <b>seq1105</b> | Firmicutes    | Clostridia   | 0                   | 0                    | 0                   | 0                    |

Sequence Count Table

|                | <b>Phylum</b> | <b>Class</b> | <b>Subject25WK0</b> | <b>Subject25WK12</b> | <b>Subject38WK0</b> | <b>Subject38WK12</b> |
|----------------|---------------|--------------|---------------------|----------------------|---------------------|----------------------|
| <b>seq660</b>  | Firmicutes    | Clostridia   | 0                   | 0                    | 0                   | 0                    |
| <b>seq714</b>  | Firmicutes    | Clostridia   | 0                   | 0                    | 0                   | 0                    |
| <b>seq779</b>  | Firmicutes    | Clostridia   | 0                   | 0                    | 0                   | 0                    |
| <b>seq911</b>  | Firmicutes    | Clostridia   | 0                   | 0                    | 0                   | 0                    |
| <b>seq1016</b> | Firmicutes    | Clostridia   | 0                   | 0                    | 0                   | 0                    |
| <b>seq1131</b> | Firmicutes    | Clostridia   | 0                   | 0                    | 0                   | 0                    |
| <b>seq1541</b> | Firmicutes    | Clostridia   | 0                   | 0                    | 0                   | 0                    |
| <b>seq949</b>  | Firmicutes    | Clostridia   | 0                   | 0                    | 0                   | 0                    |
| <b>seq233</b>  | Firmicutes    | Clostridia   | 52                  | 0                    | 0                   | 0                    |
| <b>seq299</b>  | Firmicutes    | Clostridia   | 0                   | 0                    | 0                   | 0                    |
| <b>seq577</b>  | Firmicutes    | Clostridia   | 0                   | 0                    | 0                   | 0                    |
| <b>seq672</b>  | Firmicutes    | Clostridia   | 0                   | 0                    | 0                   | 0                    |
| <b>seq740</b>  | Firmicutes    | Clostridia   | 0                   | 0                    | 0                   | 0                    |
| <b>seq1699</b> | Firmicutes    | Clostridia   | 0                   | 0                    | 0                   | 0                    |
| <b>seq1768</b> | Firmicutes    | Clostridia   | 0                   | 0                    | 0                   | 0                    |
| <b>seq212</b>  | Firmicutes    | Clostridia   | 139                 | 22                   | 0                   | 0                    |
| <b>seq372</b>  | Firmicutes    | Clostridia   | 0                   | 0                    | 0                   | 0                    |
| <b>seq625</b>  | Firmicutes    | Clostridia   | 0                   | 0                    | 0                   | 0                    |
| <b>seq1055</b> | Firmicutes    | Clostridia   | 0                   | 0                    | 0                   | 0                    |
| <b>seq27</b>   | Firmicutes    | Clostridia   | 473                 | 0                    | 0                   | 0                    |
| <b>seq69</b>   | Firmicutes    | Clostridia   | 145                 | 0                    | 0                   | 0                    |
| <b>seq85</b>   | Firmicutes    | Clostridia   | 17                  | 0                    | 0                   | 0                    |
| <b>seq198</b>  | Firmicutes    | Clostridia   | 0                   | 0                    | 0                   | 0                    |
| <b>seq204</b>  | Firmicutes    | Clostridia   | 0                   | 0                    | 0                   | 0                    |
| <b>seq230</b>  | Firmicutes    | Clostridia   | 0                   | 0                    | 0                   | 0                    |
| <b>seq246</b>  | Firmicutes    | Clostridia   | 0                   | 0                    | 0                   | 0                    |
| <b>seq644</b>  | Firmicutes    | Clostridia   | 0                   | 0                    | 0                   | 0                    |
| <b>seq926</b>  | Firmicutes    | Clostridia   | 0                   | 0                    | 0                   | 0                    |
| <b>seq951</b>  | Firmicutes    | Clostridia   | 0                   | 0                    | 0                   | 0                    |
| <b>seq1040</b> | Firmicutes    | Clostridia   | 0                   | 0                    | 0                   | 0                    |
| <b>seq1072</b> | Firmicutes    | Clostridia   | 0                   | 0                    | 0                   | 0                    |
| <b>seq1105</b> | Firmicutes    | Clostridia   | 0                   | 0                    | 0                   | 0                    |

Sequence Count Table

|                | <b>Phylum</b> | <b>Class</b> | <b>Subject31WK0</b> | <b>Subject31WK12</b> | <b>Subject32WK0</b> | <b>Subject32WK12</b> |
|----------------|---------------|--------------|---------------------|----------------------|---------------------|----------------------|
| <b>seq660</b>  | Firmicutes    | Clostridia   | 0                   | 0                    | 0                   | 0                    |
| <b>seq714</b>  | Firmicutes    | Clostridia   | 0                   | 0                    | 0                   | 0                    |
| <b>seq779</b>  | Firmicutes    | Clostridia   | 0                   | 0                    | 0                   | 0                    |
| <b>seq911</b>  | Firmicutes    | Clostridia   | 0                   | 0                    | 0                   | 0                    |
| <b>seq1016</b> | Firmicutes    | Clostridia   | 0                   | 0                    | 0                   | 0                    |
| <b>seq1131</b> | Firmicutes    | Clostridia   | 0                   | 0                    | 0                   | 0                    |
| <b>seq1541</b> | Firmicutes    | Clostridia   | 0                   | 0                    | 0                   | 0                    |
| <b>seq949</b>  | Firmicutes    | Clostridia   | 0                   | 0                    | 0                   | 0                    |
| <b>seq233</b>  | Firmicutes    | Clostridia   | 0                   | 0                    | 0                   | 0                    |
| <b>seq299</b>  | Firmicutes    | Clostridia   | 0                   | 0                    | 0                   | 0                    |
| <b>seq577</b>  | Firmicutes    | Clostridia   | 0                   | 0                    | 0                   | 0                    |
| <b>seq672</b>  | Firmicutes    | Clostridia   | 0                   | 0                    | 0                   | 0                    |
| <b>seq740</b>  | Firmicutes    | Clostridia   | 0                   | 0                    | 0                   | 0                    |
| <b>seq1699</b> | Firmicutes    | Clostridia   | 0                   | 0                    | 0                   | 0                    |
| <b>seq1768</b> | Firmicutes    | Clostridia   | 0                   | 0                    | 0                   | 0                    |
| <b>seq212</b>  | Firmicutes    | Clostridia   | 0                   | 0                    | 0                   | 0                    |
| <b>seq372</b>  | Firmicutes    | Clostridia   | 0                   | 0                    | 0                   | 0                    |
| <b>seq625</b>  | Firmicutes    | Clostridia   | 0                   | 0                    | 0                   | 0                    |
| <b>seq1055</b> | Firmicutes    | Clostridia   | 0                   | 0                    | 0                   | 0                    |
| <b>seq27</b>   | Firmicutes    | Clostridia   | 0                   | 0                    | 0                   | 0                    |
| <b>seq69</b>   | Firmicutes    | Clostridia   | 0                   | 0                    | 44                  | 0                    |
| <b>seq85</b>   | Firmicutes    | Clostridia   | 0                   | 0                    | 65                  | 0                    |
| <b>seq198</b>  | Firmicutes    | Clostridia   | 0                   | 0                    | 0                   | 0                    |
| <b>seq204</b>  | Firmicutes    | Clostridia   | 0                   | 0                    | 0                   | 0                    |
| <b>seq230</b>  | Firmicutes    | Clostridia   | 0                   | 0                    | 0                   | 0                    |
| <b>seq246</b>  | Firmicutes    | Clostridia   | 0                   | 0                    | 0                   | 0                    |
| <b>seq644</b>  | Firmicutes    | Clostridia   | 0                   | 0                    | 0                   | 0                    |
| <b>seq926</b>  | Firmicutes    | Clostridia   | 0                   | 0                    | 0                   | 0                    |
| <b>seq951</b>  | Firmicutes    | Clostridia   | 0                   | 0                    | 0                   | 0                    |
| <b>seq1040</b> | Firmicutes    | Clostridia   | 0                   | 0                    | 0                   | 0                    |
| <b>seq1072</b> | Firmicutes    | Clostridia   | 0                   | 0                    | 0                   | 0                    |
| <b>seq1105</b> | Firmicutes    | Clostridia   | 0                   | 0                    | 0                   | 0                    |

Sequence Count Table

|                | <b>Phylum</b> | <b>Class</b> | <b>Subject13WK0</b> | <b>Subject13WK12</b> | <b>Subject39WK0</b> | <b>Subject39WK12</b> |
|----------------|---------------|--------------|---------------------|----------------------|---------------------|----------------------|
| <b>seq660</b>  | Firmicutes    | Clostridia   | 0                   | 0                    | 0                   | 0                    |
| <b>seq714</b>  | Firmicutes    | Clostridia   | 0                   | 0                    | 0                   | 0                    |
| <b>seq779</b>  | Firmicutes    | Clostridia   | 0                   | 0                    | 0                   | 0                    |
| <b>seq911</b>  | Firmicutes    | Clostridia   | 0                   | 0                    | 0                   | 0                    |
| <b>seq1016</b> | Firmicutes    | Clostridia   | 0                   | 0                    | 0                   | 0                    |
| <b>seq1131</b> | Firmicutes    | Clostridia   | 0                   | 0                    | 0                   | 0                    |
| <b>seq1541</b> | Firmicutes    | Clostridia   | 0                   | 0                    | 0                   | 0                    |
| <b>seq949</b>  | Firmicutes    | Clostridia   | 0                   | 0                    | 0                   | 0                    |
| <b>seq233</b>  | Firmicutes    | Clostridia   | 188                 | 118                  | 0                   | 110                  |
| <b>seq299</b>  | Firmicutes    | Clostridia   | 68                  | 37                   | 0                   | 28                   |
| <b>seq577</b>  | Firmicutes    | Clostridia   | 0                   | 23                   | 0                   | 0                    |
| <b>seq672</b>  | Firmicutes    | Clostridia   | 0                   | 0                    | 0                   | 0                    |
| <b>seq740</b>  | Firmicutes    | Clostridia   | 0                   | 0                    | 0                   | 0                    |
| <b>seq1699</b> | Firmicutes    | Clostridia   | 0                   | 0                    | 0                   | 0                    |
| <b>seq1768</b> | Firmicutes    | Clostridia   | 0                   | 0                    | 0                   | 0                    |
| <b>seq212</b>  | Firmicutes    | Clostridia   | 86                  | 50                   | 0                   | 45                   |
| <b>seq372</b>  | Firmicutes    | Clostridia   | 0                   | 0                    | 0                   | 22                   |
| <b>seq625</b>  | Firmicutes    | Clostridia   | 0                   | 0                    | 0                   | 0                    |
| <b>seq1055</b> | Firmicutes    | Clostridia   | 0                   | 0                    | 0                   | 0                    |
| <b>seq27</b>   | Firmicutes    | Clostridia   | 2396                | 76                   | 0                   | 246                  |
| <b>seq69</b>   | Firmicutes    | Clostridia   | 0                   | 28                   | 0                   | 33                   |
| <b>seq85</b>   | Firmicutes    | Clostridia   | 0                   | 0                    | 0                   | 0                    |
| <b>seq198</b>  | Firmicutes    | Clostridia   | 0                   | 189                  | 0                   | 0                    |
| <b>seq204</b>  | Firmicutes    | Clostridia   | 0                   | 0                    | 0                   | 0                    |
| <b>seq230</b>  | Firmicutes    | Clostridia   | 0                   | 0                    | 0                   | 0                    |
| <b>seq246</b>  | Firmicutes    | Clostridia   | 0                   | 0                    | 0                   | 0                    |
| <b>seq644</b>  | Firmicutes    | Clostridia   | 0                   | 0                    | 0                   | 0                    |
| <b>seq926</b>  | Firmicutes    | Clostridia   | 0                   | 0                    | 0                   | 0                    |
| <b>seq951</b>  | Firmicutes    | Clostridia   | 0                   | 0                    | 0                   | 0                    |
| <b>seq1040</b> | Firmicutes    | Clostridia   | 0                   | 0                    | 0                   | 0                    |
| <b>seq1072</b> | Firmicutes    | Clostridia   | 0                   | 0                    | 0                   | 0                    |
| <b>seq1105</b> | Firmicutes    | Clostridia   | 0                   | 0                    | 0                   | 0                    |

Sequence Count Table

|                | <b>Phylum</b> | <b>Class</b> | <b>Subject26WK0</b> | <b>Subject26WK12</b> | <b>Subject14WK0</b> | <b>Subject14WK12</b> |
|----------------|---------------|--------------|---------------------|----------------------|---------------------|----------------------|
| <b>seq660</b>  | Firmicutes    | Clostridia   | 0                   | 0                    | 0                   | 0                    |
| <b>seq714</b>  | Firmicutes    | Clostridia   | 0                   | 0                    | 0                   | 0                    |
| <b>seq779</b>  | Firmicutes    | Clostridia   | 0                   | 0                    | 0                   | 0                    |
| <b>seq911</b>  | Firmicutes    | Clostridia   | 0                   | 0                    | 0                   | 0                    |
| <b>seq1016</b> | Firmicutes    | Clostridia   | 0                   | 0                    | 0                   | 0                    |
| <b>seq1131</b> | Firmicutes    | Clostridia   | 0                   | 0                    | 0                   | 0                    |
| <b>seq1541</b> | Firmicutes    | Clostridia   | 0                   | 0                    | 0                   | 0                    |
| <b>seq949</b>  | Firmicutes    | Clostridia   | 0                   | 0                    | 0                   | 0                    |
| <b>seq233</b>  | Firmicutes    | Clostridia   | 0                   | 0                    | 0                   | 0                    |
| <b>seq299</b>  | Firmicutes    | Clostridia   | 154                 | 186                  | 0                   | 0                    |
| <b>seq577</b>  | Firmicutes    | Clostridia   | 0                   | 21                   | 0                   | 0                    |
| <b>seq672</b>  | Firmicutes    | Clostridia   | 0                   | 0                    | 0                   | 0                    |
| <b>seq740</b>  | Firmicutes    | Clostridia   | 0                   | 0                    | 0                   | 0                    |
| <b>seq1699</b> | Firmicutes    | Clostridia   | 0                   | 0                    | 0                   | 0                    |
| <b>seq1768</b> | Firmicutes    | Clostridia   | 0                   | 0                    | 0                   | 0                    |
| <b>seq212</b>  | Firmicutes    | Clostridia   | 0                   | 0                    | 57                  | 219                  |
| <b>seq372</b>  | Firmicutes    | Clostridia   | 0                   | 0                    | 92                  | 258                  |
| <b>seq625</b>  | Firmicutes    | Clostridia   | 0                   | 0                    | 0                   | 0                    |
| <b>seq1055</b> | Firmicutes    | Clostridia   | 0                   | 0                    | 0                   | 0                    |
| <b>seq27</b>   | Firmicutes    | Clostridia   | 215                 | 847                  | 249                 | 185                  |
| <b>seq69</b>   | Firmicutes    | Clostridia   | 723                 | 2243                 | 236                 | 0                    |
| <b>seq85</b>   | Firmicutes    | Clostridia   | 57                  | 440                  | 0                   | 0                    |
| <b>seq198</b>  | Firmicutes    | Clostridia   | 599                 | 73                   | 722                 | 320                  |
| <b>seq204</b>  | Firmicutes    | Clostridia   | 0                   | 0                    | 0                   | 0                    |
| <b>seq230</b>  | Firmicutes    | Clostridia   | 0                   | 0                    | 0                   | 0                    |
| <b>seq246</b>  | Firmicutes    | Clostridia   | 0                   | 0                    | 0                   | 0                    |
| <b>seq644</b>  | Firmicutes    | Clostridia   | 0                   | 0                    | 0                   | 0                    |
| <b>seq926</b>  | Firmicutes    | Clostridia   | 0                   | 0                    | 0                   | 0                    |
| <b>seq951</b>  | Firmicutes    | Clostridia   | 0                   | 0                    | 0                   | 0                    |
| <b>seq1040</b> | Firmicutes    | Clostridia   | 0                   | 0                    | 0                   | 0                    |
| <b>seq1072</b> | Firmicutes    | Clostridia   | 0                   | 0                    | 0                   | 0                    |
| <b>seq1105</b> | Firmicutes    | Clostridia   | 0                   | 0                    | 0                   | 0                    |

Sequence Count Table

|                | <b>Phylum</b> | <b>Class</b> | <b>Subject27WK0</b> | <b>Subject27WK12</b> | <b>Subject15WK0</b> | <b>Subject15WK12</b> |
|----------------|---------------|--------------|---------------------|----------------------|---------------------|----------------------|
| <b>seq660</b>  | Firmicutes    | Clostridia   | 0                   | 0                    | 0                   | 0                    |
| <b>seq714</b>  | Firmicutes    | Clostridia   | 0                   | 0                    | 72                  | 103                  |
| <b>seq779</b>  | Firmicutes    | Clostridia   | 0                   | 0                    | 0                   | 0                    |
| <b>seq911</b>  | Firmicutes    | Clostridia   | 0                   | 0                    | 0                   | 0                    |
| <b>seq1016</b> | Firmicutes    | Clostridia   | 0                   | 0                    | 0                   | 0                    |
| <b>seq1131</b> | Firmicutes    | Clostridia   | 0                   | 0                    | 0                   | 0                    |
| <b>seq1541</b> | Firmicutes    | Clostridia   | 0                   | 0                    | 0                   | 0                    |
| <b>seq949</b>  | Firmicutes    | Clostridia   | 0                   | 0                    | 18                  | 0                    |
| <b>seq233</b>  | Firmicutes    | Clostridia   | 308                 | 147                  | 24                  | 266                  |
| <b>seq299</b>  | Firmicutes    | Clostridia   | 142                 | 112                  | 84                  | 64                   |
| <b>seq577</b>  | Firmicutes    | Clostridia   | 0                   | 0                    | 0                   | 0                    |
| <b>seq672</b>  | Firmicutes    | Clostridia   | 0                   | 0                    | 0                   | 0                    |
| <b>seq740</b>  | Firmicutes    | Clostridia   | 0                   | 24                   | 0                   | 0                    |
| <b>seq1699</b> | Firmicutes    | Clostridia   | 0                   | 0                    | 0                   | 0                    |
| <b>seq1768</b> | Firmicutes    | Clostridia   | 0                   | 0                    | 0                   | 0                    |
| <b>seq212</b>  | Firmicutes    | Clostridia   | 98                  | 133                  | 0                   | 95                   |
| <b>seq372</b>  | Firmicutes    | Clostridia   | 0                   | 0                    | 0                   | 0                    |
| <b>seq625</b>  | Firmicutes    | Clostridia   | 0                   | 0                    | 51                  | 96                   |
| <b>seq1055</b> | Firmicutes    | Clostridia   | 0                   | 0                    | 0                   | 0                    |
| <b>seq27</b>   | Firmicutes    | Clostridia   | 59                  | 758                  | 775                 | 2205                 |
| <b>seq69</b>   | Firmicutes    | Clostridia   | 370                 | 781                  | 466                 | 1733                 |
| <b>seq85</b>   | Firmicutes    | Clostridia   | 21                  | 15                   | 0                   | 0                    |
| <b>seq198</b>  | Firmicutes    | Clostridia   | 0                   | 0                    | 0                   | 0                    |
| <b>seq204</b>  | Firmicutes    | Clostridia   | 0                   | 0                    | 0                   | 0                    |
| <b>seq230</b>  | Firmicutes    | Clostridia   | 0                   | 0                    | 0                   | 0                    |
| <b>seq246</b>  | Firmicutes    | Clostridia   | 0                   | 0                    | 0                   | 0                    |
| <b>seq644</b>  | Firmicutes    | Clostridia   | 0                   | 0                    | 112                 | 362                  |
| <b>seq926</b>  | Firmicutes    | Clostridia   | 0                   | 0                    | 0                   | 0                    |
| <b>seq951</b>  | Firmicutes    | Clostridia   | 0                   | 0                    | 0                   | 0                    |
| <b>seq1040</b> | Firmicutes    | Clostridia   | 0                   | 0                    | 0                   | 0                    |
| <b>seq1072</b> | Firmicutes    | Clostridia   | 0                   | 0                    | 0                   | 0                    |
| <b>seq1105</b> | Firmicutes    | Clostridia   | 0                   | 0                    | 0                   | 0                    |



Sequence Count Table

|                | <b>Phylum</b> | <b>Class</b> | <b>Δ</b> |  |  |  |
|----------------|---------------|--------------|----------|--|--|--|
| <b>seq660</b>  | Firmicutes    | Clostridia   |          |  |  |  |
| <b>seq714</b>  | Firmicutes    | Clostridia   |          |  |  |  |
| <b>seq779</b>  | Firmicutes    | Clostridia   |          |  |  |  |
| <b>seq911</b>  | Firmicutes    | Clostridia   |          |  |  |  |
| <b>seq1016</b> | Firmicutes    | Clostridia   |          |  |  |  |
| <b>seq1131</b> | Firmicutes    | Clostridia   |          |  |  |  |
| <b>seq1541</b> | Firmicutes    | Clostridia   |          |  |  |  |
| <b>seq949</b>  | Firmicutes    | Clostridia   |          |  |  |  |
| <b>seq233</b>  | Firmicutes    | Clostridia   |          |  |  |  |
| <b>seq299</b>  | Firmicutes    | Clostridia   |          |  |  |  |
| <b>seq577</b>  | Firmicutes    | Clostridia   |          |  |  |  |
| <b>seq672</b>  | Firmicutes    | Clostridia   |          |  |  |  |
| <b>seq740</b>  | Firmicutes    | Clostridia   |          |  |  |  |
| <b>seq1699</b> | Firmicutes    | Clostridia   |          |  |  |  |
| <b>seq1768</b> | Firmicutes    | Clostridia   |          |  |  |  |
| <b>seq212</b>  | Firmicutes    | Clostridia   |          |  |  |  |
| <b>seq372</b>  | Firmicutes    | Clostridia   |          |  |  |  |
| <b>seq625</b>  | Firmicutes    | Clostridia   |          |  |  |  |
| <b>seq1055</b> | Firmicutes    | Clostridia   |          |  |  |  |
| <b>seq27</b>   | Firmicutes    | Clostridia   |          |  |  |  |
| <b>seq69</b>   | Firmicutes    | Clostridia   |          |  |  |  |
| <b>seq85</b>   | Firmicutes    | Clostridia   |          |  |  |  |
| <b>seq198</b>  | Firmicutes    | Clostridia   |          |  |  |  |
| <b>seq204</b>  | Firmicutes    | Clostridia   |          |  |  |  |
| <b>seq230</b>  | Firmicutes    | Clostridia   |          |  |  |  |
| <b>seq246</b>  | Firmicutes    | Clostridia   |          |  |  |  |
| <b>seq644</b>  | Firmicutes    | Clostridia   |          |  |  |  |
| <b>seq926</b>  | Firmicutes    | Clostridia   |          |  |  |  |
| <b>seq951</b>  | Firmicutes    | Clostridia   |          |  |  |  |
| <b>seq1040</b> | Firmicutes    | Clostridia   |          |  |  |  |
| <b>seq1072</b> | Firmicutes    | Clostridia   |          |  |  |  |
| <b>seq1105</b> | Firmicutes    | Clostridia   |          |  |  |  |

Sequence Count Table

|                | <b>Phylum</b> | <b>Class</b> | <b>Order</b>  | <b>Family</b>   |
|----------------|---------------|--------------|---------------|-----------------|
| <b>seq1144</b> | Firmicutes    | Clostridia   | Clostridiales | Lachnospiraceae |
| <b>seq1173</b> | Firmicutes    | Clostridia   | Clostridiales | Lachnospiraceae |
| <b>seq1246</b> | Firmicutes    | Clostridia   | Clostridiales | Lachnospiraceae |
| <b>seq1316</b> | Firmicutes    | Clostridia   | Clostridiales | Lachnospiraceae |
| <b>seq190</b>  | Firmicutes    | Clostridia   | Clostridiales | Lachnospiraceae |
| <b>seq552</b>  | Firmicutes    | Clostridia   | Clostridiales | Lachnospiraceae |
| <b>seq781</b>  | Firmicutes    | Clostridia   | Clostridiales | Lachnospiraceae |
| <b>seq1085</b> | Firmicutes    | Clostridia   | Clostridiales | Lachnospiraceae |
| <b>seq1265</b> | Firmicutes    | Clostridia   | Clostridiales | Lachnospiraceae |
| <b>seq1598</b> | Firmicutes    | Clostridia   | Clostridiales | Lachnospiraceae |
| <b>seq1621</b> | Firmicutes    | Clostridia   | Clostridiales | Lachnospiraceae |
| <b>seq1076</b> | Firmicutes    | Clostridia   | Clostridiales | Lachnospiraceae |
| <b>seq283</b>  | Firmicutes    | Clostridia   | Clostridiales | Lachnospiraceae |
| <b>seq941</b>  | Firmicutes    | Clostridia   | Clostridiales | Lachnospiraceae |
| <b>seq1003</b> | Firmicutes    | Clostridia   | Clostridiales | Lachnospiraceae |
| <b>seq1209</b> | Firmicutes    | Clostridia   | Clostridiales | Lachnospiraceae |
| <b>seq1559</b> | Firmicutes    | Clostridia   | Clostridiales | Lachnospiraceae |
| <b>seq172</b>  | Firmicutes    | Clostridia   | Clostridiales | Lachnospiraceae |
| <b>seq737</b>  | Firmicutes    | Clostridia   | Clostridiales | Lachnospiraceae |
| <b>seq738</b>  | Firmicutes    | Clostridia   | Clostridiales | Lachnospiraceae |
| <b>seq225</b>  | Firmicutes    | Clostridia   | Clostridiales | Lachnospiraceae |
| <b>seq1032</b> | Firmicutes    | Clostridia   | Clostridiales | Lachnospiraceae |
| <b>seq1255</b> | Firmicutes    | Clostridia   | Clostridiales | Lachnospiraceae |
| <b>seq25</b>   | Firmicutes    | Clostridia   | Clostridiales | Lachnospiraceae |
| <b>seq29</b>   | Firmicutes    | Clostridia   | Clostridiales | Lachnospiraceae |
| <b>seq37</b>   | Firmicutes    | Clostridia   | Clostridiales | Lachnospiraceae |
| <b>seq44</b>   | Firmicutes    | Clostridia   | Clostridiales | Lachnospiraceae |
| <b>seq49</b>   | Firmicutes    | Clostridia   | Clostridiales | Lachnospiraceae |
| <b>seq52</b>   | Firmicutes    | Clostridia   | Clostridiales | Lachnospiraceae |
| <b>seq71</b>   | Firmicutes    | Clostridia   | Clostridiales | Lachnospiraceae |
| <b>seq82</b>   | Firmicutes    | Clostridia   | Clostridiales | Lachnospiraceae |
| <b>seq94</b>   | Firmicutes    | Clostridia   | Clostridiales | Lachnospiraceae |

Sequence Count Table

|                | <b>Phylum</b> | <b>Class</b> | <b>Genus</b>   | <b>Species</b> |
|----------------|---------------|--------------|----------------|----------------|
| <b>seq1144</b> | Firmicutes    | Clostridia   | Roseburia      |                |
| <b>seq1173</b> | Firmicutes    | Clostridia   | Roseburia      |                |
| <b>seq1246</b> | Firmicutes    | Clostridia   | Roseburia      |                |
| <b>seq1316</b> | Firmicutes    | Clostridia   | Roseburia      |                |
| <b>seq190</b>  | Firmicutes    | Clostridia   | Sellimonas     | intestinalis   |
| <b>seq552</b>  | Firmicutes    | Clostridia   | Sellimonas     |                |
| <b>seq781</b>  | Firmicutes    | Clostridia   | Sellimonas     |                |
| <b>seq1085</b> | Firmicutes    | Clostridia   | Sellimonas     |                |
| <b>seq1265</b> | Firmicutes    | Clostridia   | Sellimonas     |                |
| <b>seq1598</b> | Firmicutes    | Clostridia   | Sellimonas     |                |
| <b>seq1621</b> | Firmicutes    | Clostridia   | Sellimonas     |                |
| <b>seq1076</b> | Firmicutes    | Clostridia   | Shuttleworthia |                |
| <b>seq283</b>  | Firmicutes    | Clostridia   | Tyzzarella     |                |
| <b>seq941</b>  | Firmicutes    | Clostridia   | Tyzzarella     |                |
| <b>seq1003</b> | Firmicutes    | Clostridia   | Tyzzarella     |                |
| <b>seq1209</b> | Firmicutes    | Clostridia   | Tyzzarella     |                |
| <b>seq1559</b> | Firmicutes    | Clostridia   | Tyzzarella     |                |
| <b>seq172</b>  | Firmicutes    | Clostridia   | Tyzzarella_3   |                |
| <b>seq737</b>  | Firmicutes    | Clostridia   | Tyzzarella_3   |                |
| <b>seq738</b>  | Firmicutes    | Clostridia   | Tyzzarella_3   |                |
| <b>seq225</b>  | Firmicutes    | Clostridia   | Tyzzarella_4   | nexilis        |
| <b>seq1032</b> | Firmicutes    | Clostridia   | Tyzzarella_4   |                |
| <b>seq1255</b> | Firmicutes    | Clostridia   | UC5-1-2E3      |                |
| <b>seq25</b>   | Firmicutes    | Clostridia   |                |                |
| <b>seq29</b>   | Firmicutes    | Clostridia   |                |                |
| <b>seq37</b>   | Firmicutes    | Clostridia   |                |                |
| <b>seq44</b>   | Firmicutes    | Clostridia   |                |                |
| <b>seq49</b>   | Firmicutes    | Clostridia   |                |                |
| <b>seq52</b>   | Firmicutes    | Clostridia   |                |                |
| <b>seq71</b>   | Firmicutes    | Clostridia   |                |                |
| <b>seq82</b>   | Firmicutes    | Clostridia   |                |                |
| <b>seq94</b>   | Firmicutes    | Clostridia   |                |                |

Sequence Count Table

|                | <b>Phylum</b> | <b>Class</b> | <b>Subject34WK0</b> | <b>Subject34WK12</b> | <b>Subject16WK0</b> | <b>Subject16WK12</b> |
|----------------|---------------|--------------|---------------------|----------------------|---------------------|----------------------|
| <b>seq1144</b> | Firmicutes    | Clostridia   | 0                   | 0                    | 0                   | 0                    |
| <b>seq1173</b> | Firmicutes    | Clostridia   | 0                   | 0                    | 0                   | 0                    |
| <b>seq1246</b> | Firmicutes    | Clostridia   | 0                   | 0                    | 0                   | 0                    |
| <b>seq1316</b> | Firmicutes    | Clostridia   | 0                   | 0                    | 0                   | 0                    |
| <b>seq190</b>  | Firmicutes    | Clostridia   | 0                   | 0                    | 0                   | 0                    |
| <b>seq552</b>  | Firmicutes    | Clostridia   | 0                   | 0                    | 0                   | 0                    |
| <b>seq781</b>  | Firmicutes    | Clostridia   | 0                   | 0                    | 0                   | 0                    |
| <b>seq1085</b> | Firmicutes    | Clostridia   | 0                   | 0                    | 0                   | 0                    |
| <b>seq1265</b> | Firmicutes    | Clostridia   | 0                   | 0                    | 0                   | 0                    |
| <b>seq1598</b> | Firmicutes    | Clostridia   | 0                   | 0                    | 0                   | 0                    |
| <b>seq1621</b> | Firmicutes    | Clostridia   | 0                   | 0                    | 0                   | 0                    |
| <b>seq1076</b> | Firmicutes    | Clostridia   | 0                   | 0                    | 0                   | 0                    |
| <b>seq283</b>  | Firmicutes    | Clostridia   | 0                   | 0                    | 0                   | 0                    |
| <b>seq941</b>  | Firmicutes    | Clostridia   | 0                   | 0                    | 0                   | 0                    |
| <b>seq1003</b> | Firmicutes    | Clostridia   | 0                   | 0                    | 0                   | 0                    |
| <b>seq1209</b> | Firmicutes    | Clostridia   | 0                   | 0                    | 29                  | 0                    |
| <b>seq1559</b> | Firmicutes    | Clostridia   | 0                   | 0                    | 0                   | 0                    |
| <b>seq172</b>  | Firmicutes    | Clostridia   | 14                  | 27                   | 0                   | 0                    |
| <b>seq737</b>  | Firmicutes    | Clostridia   | 0                   | 0                    | 0                   | 0                    |
| <b>seq738</b>  | Firmicutes    | Clostridia   | 0                   | 0                    | 0                   | 0                    |
| <b>seq225</b>  | Firmicutes    | Clostridia   | 0                   | 0                    | 0                   | 0                    |
| <b>seq1032</b> | Firmicutes    | Clostridia   | 0                   | 0                    | 0                   | 0                    |
| <b>seq1255</b> | Firmicutes    | Clostridia   | 0                   | 0                    | 0                   | 0                    |
| <b>seq25</b>   | Firmicutes    | Clostridia   | 31                  | 713                  | 664                 | 770                  |
| <b>seq29</b>   | Firmicutes    | Clostridia   | 30                  | 716                  | 252                 | 748                  |
| <b>seq37</b>   | Firmicutes    | Clostridia   | 0                   | 71                   | 21                  | 58                   |
| <b>seq44</b>   | Firmicutes    | Clostridia   | 18                  | 193                  | 708                 | 278                  |
| <b>seq49</b>   | Firmicutes    | Clostridia   | 0                   | 0                    | 139                 | 325                  |
| <b>seq52</b>   | Firmicutes    | Clostridia   | 0                   | 0                    | 0                   | 0                    |
| <b>seq71</b>   | Firmicutes    | Clostridia   | 0                   | 163                  | 0                   | 0                    |
| <b>seq82</b>   | Firmicutes    | Clostridia   | 0                   | 0                    | 432                 | 300                  |
| <b>seq94</b>   | Firmicutes    | Clostridia   | 0                   | 0                    | 235                 | 416                  |

Sequence Count Table

|                | <b>Phylum</b> | <b>Class</b> | <b>Subject17WK0</b> | <b>Subject17WK12</b> | <b>Subject1WK0</b> | <b>Subject1WK12</b> |
|----------------|---------------|--------------|---------------------|----------------------|--------------------|---------------------|
| <b>seq1144</b> | Firmicutes    | Clostridia   | 0                   | 0                    | 0                  | 0                   |
| <b>seq1173</b> | Firmicutes    | Clostridia   | 0                   | 0                    | 0                  | 0                   |
| <b>seq1246</b> | Firmicutes    | Clostridia   | 0                   | 0                    | 0                  | 0                   |
| <b>seq1316</b> | Firmicutes    | Clostridia   | 0                   | 0                    | 0                  | 0                   |
| <b>seq190</b>  | Firmicutes    | Clostridia   | 0                   | 0                    | 25                 | 16                  |
| <b>seq552</b>  | Firmicutes    | Clostridia   | 0                   | 0                    | 0                  | 0                   |
| <b>seq781</b>  | Firmicutes    | Clostridia   | 0                   | 0                    | 0                  | 0                   |
| <b>seq1085</b> | Firmicutes    | Clostridia   | 0                   | 0                    | 0                  | 0                   |
| <b>seq1265</b> | Firmicutes    | Clostridia   | 0                   | 0                    | 0                  | 0                   |
| <b>seq1598</b> | Firmicutes    | Clostridia   | 0                   | 0                    | 0                  | 0                   |
| <b>seq1621</b> | Firmicutes    | Clostridia   | 0                   | 0                    | 0                  | 0                   |
| <b>seq1076</b> | Firmicutes    | Clostridia   | 0                   | 0                    | 0                  | 9                   |
| <b>seq283</b>  | Firmicutes    | Clostridia   | 0                   | 0                    | 227                | 202                 |
| <b>seq941</b>  | Firmicutes    | Clostridia   | 0                   | 0                    | 0                  | 0                   |
| <b>seq1003</b> | Firmicutes    | Clostridia   | 0                   | 0                    | 0                  | 0                   |
| <b>seq1209</b> | Firmicutes    | Clostridia   | 0                   | 15                   | 0                  | 0                   |
| <b>seq1559</b> | Firmicutes    | Clostridia   | 0                   | 0                    | 0                  | 0                   |
| <b>seq172</b>  | Firmicutes    | Clostridia   | 0                   | 77                   | 0                  | 0                   |
| <b>seq737</b>  | Firmicutes    | Clostridia   | 0                   | 0                    | 0                  | 0                   |
| <b>seq738</b>  | Firmicutes    | Clostridia   | 0                   | 0                    | 0                  | 0                   |
| <b>seq225</b>  | Firmicutes    | Clostridia   | 272                 | 12                   | 0                  | 0                   |
| <b>seq1032</b> | Firmicutes    | Clostridia   | 0                   | 0                    | 0                  | 0                   |
| <b>seq1255</b> | Firmicutes    | Clostridia   | 8                   | 0                    | 0                  | 0                   |
| <b>seq25</b>   | Firmicutes    | Clostridia   | 1313                | 2709                 | 760                | 708                 |
| <b>seq29</b>   | Firmicutes    | Clostridia   | 1658                | 3250                 | 1075               | 793                 |
| <b>seq37</b>   | Firmicutes    | Clostridia   | 428                 | 149                  | 645                | 579                 |
| <b>seq44</b>   | Firmicutes    | Clostridia   | 45                  | 1132                 | 0                  | 0                   |
| <b>seq49</b>   | Firmicutes    | Clostridia   | 703                 | 1521                 | 822                | 578                 |
| <b>seq52</b>   | Firmicutes    | Clostridia   | 0                   | 0                    | 49                 | 45                  |
| <b>seq71</b>   | Firmicutes    | Clostridia   | 0                   | 0                    | 145                | 112                 |
| <b>seq82</b>   | Firmicutes    | Clostridia   | 0                   | 0                    | 1252               | 1375                |
| <b>seq94</b>   | Firmicutes    | Clostridia   | 0                   | 0                    | 803                | 945                 |

Sequence Count Table

|                | <b>Phylum</b> | <b>Class</b> | <b>Subject2WK0</b> | <b>Subject2WK12</b> | <b>Subject3WK0</b> | <b>Subject3WK12</b> |
|----------------|---------------|--------------|--------------------|---------------------|--------------------|---------------------|
| <b>seq1144</b> | Firmicutes    | Clostridia   | 0                  | 0                   | 0                  | 0                   |
| <b>seq1173</b> | Firmicutes    | Clostridia   | 0                  | 0                   | 0                  | 0                   |
| <b>seq1246</b> | Firmicutes    | Clostridia   | 0                  | 0                   | 0                  | 0                   |
| <b>seq1316</b> | Firmicutes    | Clostridia   | 0                  | 0                   | 0                  | 0                   |
| <b>seq190</b>  | Firmicutes    | Clostridia   | 35                 | 20                  | 20                 | 0                   |
| <b>seq552</b>  | Firmicutes    | Clostridia   | 0                  | 0                   | 0                  | 0                   |
| <b>seq781</b>  | Firmicutes    | Clostridia   | 0                  | 0                   | 0                  | 0                   |
| <b>seq1085</b> | Firmicutes    | Clostridia   | 0                  | 0                   | 0                  | 0                   |
| <b>seq1265</b> | Firmicutes    | Clostridia   | 0                  | 0                   | 57                 | 7                   |
| <b>seq1598</b> | Firmicutes    | Clostridia   | 0                  | 0                   | 0                  | 0                   |
| <b>seq1621</b> | Firmicutes    | Clostridia   | 0                  | 0                   | 0                  | 0                   |
| <b>seq1076</b> | Firmicutes    | Clostridia   | 0                  | 0                   | 6                  | 0                   |
| <b>seq283</b>  | Firmicutes    | Clostridia   | 0                  | 0                   | 0                  | 0                   |
| <b>seq941</b>  | Firmicutes    | Clostridia   | 15                 | 17                  | 0                  | 0                   |
| <b>seq1003</b> | Firmicutes    | Clostridia   | 0                  | 0                   | 10                 | 7                   |
| <b>seq1209</b> | Firmicutes    | Clostridia   | 0                  | 0                   | 0                  | 0                   |
| <b>seq1559</b> | Firmicutes    | Clostridia   | 0                  | 0                   | 0                  | 0                   |
| <b>seq172</b>  | Firmicutes    | Clostridia   | 0                  | 392                 | 0                  | 0                   |
| <b>seq737</b>  | Firmicutes    | Clostridia   | 0                  | 0                   | 0                  | 0                   |
| <b>seq738</b>  | Firmicutes    | Clostridia   | 0                  | 0                   | 0                  | 0                   |
| <b>seq225</b>  | Firmicutes    | Clostridia   | 0                  | 0                   | 640                | 106                 |
| <b>seq1032</b> | Firmicutes    | Clostridia   | 0                  | 0                   | 0                  | 0                   |
| <b>seq1255</b> | Firmicutes    | Clostridia   | 0                  | 0                   | 0                  | 0                   |
| <b>seq25</b>   | Firmicutes    | Clostridia   | 288                | 421                 | 12044              | 2880                |
| <b>seq29</b>   | Firmicutes    | Clostridia   | 675                | 663                 | 2149               | 1375                |
| <b>seq37</b>   | Firmicutes    | Clostridia   | 0                  | 0                   | 480                | 76                  |
| <b>seq44</b>   | Firmicutes    | Clostridia   | 822                | 899                 | 0                  | 0                   |
| <b>seq49</b>   | Firmicutes    | Clostridia   | 433                | 406                 | 840                | 560                 |
| <b>seq52</b>   | Firmicutes    | Clostridia   | 0                  | 31                  | 1536               | 367                 |
| <b>seq71</b>   | Firmicutes    | Clostridia   | 0                  | 19                  | 286                | 375                 |
| <b>seq82</b>   | Firmicutes    | Clostridia   | 1212               | 119                 | 0                  | 0                   |
| <b>seq94</b>   | Firmicutes    | Clostridia   | 0                  | 0                   | 1901               | 1491                |

Sequence Count Table

|                | <b>Phylum</b> | <b>Class</b> | <b>Subject4WK0</b> | <b>Subject4WK12</b> | <b>Subject5WK0</b> | <b>Subject5WK12</b> |
|----------------|---------------|--------------|--------------------|---------------------|--------------------|---------------------|
| <b>seq1144</b> | Firmicutes    | Clostridia   | 0                  | 0                   | 0                  | 0                   |
| <b>seq1173</b> | Firmicutes    | Clostridia   | 0                  | 0                   | 0                  | 0                   |
| <b>seq1246</b> | Firmicutes    | Clostridia   | 0                  | 0                   | 0                  | 0                   |
| <b>seq1316</b> | Firmicutes    | Clostridia   | 0                  | 0                   | 0                  | 0                   |
| <b>seq190</b>  | Firmicutes    | Clostridia   | 0                  | 0                   | 222                | 126                 |
| <b>seq552</b>  | Firmicutes    | Clostridia   | 0                  | 0                   | 0                  | 0                   |
| <b>seq781</b>  | Firmicutes    | Clostridia   | 0                  | 0                   | 132                | 61                  |
| <b>seq1085</b> | Firmicutes    | Clostridia   | 0                  | 0                   | 78                 | 14                  |
| <b>seq1265</b> | Firmicutes    | Clostridia   | 0                  | 0                   | 0                  | 0                   |
| <b>seq1598</b> | Firmicutes    | Clostridia   | 0                  | 0                   | 0                  | 0                   |
| <b>seq1621</b> | Firmicutes    | Clostridia   | 0                  | 0                   | 0                  | 0                   |
| <b>seq1076</b> | Firmicutes    | Clostridia   | 0                  | 0                   | 26                 | 0                   |
| <b>seq283</b>  | Firmicutes    | Clostridia   | 0                  | 0                   | 0                  | 0                   |
| <b>seq941</b>  | Firmicutes    | Clostridia   | 0                  | 0                   | 0                  | 0                   |
| <b>seq1003</b> | Firmicutes    | Clostridia   | 0                  | 0                   | 0                  | 0                   |
| <b>seq1209</b> | Firmicutes    | Clostridia   | 0                  | 0                   | 0                  | 0                   |
| <b>seq1559</b> | Firmicutes    | Clostridia   | 0                  | 0                   | 0                  | 0                   |
| <b>seq172</b>  | Firmicutes    | Clostridia   | 0                  | 0                   | 0                  | 0                   |
| <b>seq737</b>  | Firmicutes    | Clostridia   | 0                  | 0                   | 0                  | 0                   |
| <b>seq738</b>  | Firmicutes    | Clostridia   | 0                  | 0                   | 0                  | 0                   |
| <b>seq225</b>  | Firmicutes    | Clostridia   | 115                | 234                 | 0                  | 0                   |
| <b>seq1032</b> | Firmicutes    | Clostridia   | 0                  | 0                   | 0                  | 0                   |
| <b>seq1255</b> | Firmicutes    | Clostridia   | 0                  | 0                   | 0                  | 9                   |
| <b>seq25</b>   | Firmicutes    | Clostridia   | 161                | 1059                | 164                | 156                 |
| <b>seq29</b>   | Firmicutes    | Clostridia   | 2913               | 1335                | 0                  | 0                   |
| <b>seq37</b>   | Firmicutes    | Clostridia   | 62                 | 1735                | 318                | 2152                |
| <b>seq44</b>   | Firmicutes    | Clostridia   | 0                  | 0                   | 0                  | 251                 |
| <b>seq49</b>   | Firmicutes    | Clostridia   | 911                | 405                 | 0                  | 0                   |
| <b>seq52</b>   | Firmicutes    | Clostridia   | 0                  | 0                   | 27                 | 81                  |
| <b>seq71</b>   | Firmicutes    | Clostridia   | 30                 | 289                 | 0                  | 0                   |
| <b>seq82</b>   | Firmicutes    | Clostridia   | 343                | 675                 | 0                  | 0                   |
| <b>seq94</b>   | Firmicutes    | Clostridia   | 0                  | 0                   | 321                | 1154                |

Sequence Count Table

|                | <b>Phylum</b> | <b>Class</b> | <b>Subject6WK0</b> | <b>Subject6WK12</b> | <b>Subject18WK0</b> | <b>Subject18WK12</b> |
|----------------|---------------|--------------|--------------------|---------------------|---------------------|----------------------|
| <b>seq1144</b> | Firmicutes    | Clostridia   | 0                  | 0                   | 0                   | 0                    |
| <b>seq1173</b> | Firmicutes    | Clostridia   | 0                  | 0                   | 0                   | 0                    |
| <b>seq1246</b> | Firmicutes    | Clostridia   | 0                  | 0                   | 0                   | 0                    |
| <b>seq1316</b> | Firmicutes    | Clostridia   | 0                  | 0                   | 0                   | 0                    |
| <b>seq190</b>  | Firmicutes    | Clostridia   | 0                  | 0                   | 19                  | 0                    |
| <b>seq552</b>  | Firmicutes    | Clostridia   | 0                  | 0                   | 0                   | 0                    |
| <b>seq781</b>  | Firmicutes    | Clostridia   | 0                  | 0                   | 0                   | 0                    |
| <b>seq1085</b> | Firmicutes    | Clostridia   | 0                  | 0                   | 0                   | 0                    |
| <b>seq1265</b> | Firmicutes    | Clostridia   | 0                  | 0                   | 0                   | 0                    |
| <b>seq1598</b> | Firmicutes    | Clostridia   | 0                  | 0                   | 0                   | 0                    |
| <b>seq1621</b> | Firmicutes    | Clostridia   | 0                  | 0                   | 0                   | 0                    |
| <b>seq1076</b> | Firmicutes    | Clostridia   | 0                  | 0                   | 0                   | 0                    |
| <b>seq283</b>  | Firmicutes    | Clostridia   | 0                  | 0                   | 0                   | 0                    |
| <b>seq941</b>  | Firmicutes    | Clostridia   | 0                  | 0                   | 0                   | 0                    |
| <b>seq1003</b> | Firmicutes    | Clostridia   | 0                  | 0                   | 0                   | 0                    |
| <b>seq1209</b> | Firmicutes    | Clostridia   | 0                  | 0                   | 0                   | 0                    |
| <b>seq1559</b> | Firmicutes    | Clostridia   | 0                  | 0                   | 0                   | 0                    |
| <b>seq172</b>  | Firmicutes    | Clostridia   | 0                  | 0                   | 0                   | 0                    |
| <b>seq737</b>  | Firmicutes    | Clostridia   | 0                  | 0                   | 0                   | 0                    |
| <b>seq738</b>  | Firmicutes    | Clostridia   | 0                  | 0                   | 0                   | 0                    |
| <b>seq225</b>  | Firmicutes    | Clostridia   | 0                  | 11                  | 0                   | 0                    |
| <b>seq1032</b> | Firmicutes    | Clostridia   | 0                  | 0                   | 0                   | 0                    |
| <b>seq1255</b> | Firmicutes    | Clostridia   | 0                  | 0                   | 0                   | 0                    |
| <b>seq25</b>   | Firmicutes    | Clostridia   | 2658               | 3612                | 0                   | 0                    |
| <b>seq29</b>   | Firmicutes    | Clostridia   | 559                | 992                 | 102                 | 87                   |
| <b>seq37</b>   | Firmicutes    | Clostridia   | 8                  | 48                  | 47                  | 1217                 |
| <b>seq44</b>   | Firmicutes    | Clostridia   | 314                | 636                 | 356                 | 0                    |
| <b>seq49</b>   | Firmicutes    | Clostridia   | 297                | 383                 | 341                 | 269                  |
| <b>seq52</b>   | Firmicutes    | Clostridia   | 0                  | 0                   | 867                 | 312                  |
| <b>seq71</b>   | Firmicutes    | Clostridia   | 0                  | 0                   | 928                 | 392                  |
| <b>seq82</b>   | Firmicutes    | Clostridia   | 501                | 331                 | 900                 | 0                    |
| <b>seq94</b>   | Firmicutes    | Clostridia   | 691                | 0                   | 1971                | 0                    |



Sequence Count Table

|                | <b>Phylum</b> | <b>Class</b> | <b>Subject19WK0</b> | <b>Subject19WK12</b> | <b>Subject20WK0</b> | <b>Subject20WK12</b> |
|----------------|---------------|--------------|---------------------|----------------------|---------------------|----------------------|
| <b>seq1144</b> | Firmicutes    | Clostridia   | 0                   | 0                    | 0                   | 0                    |
| <b>seq1173</b> | Firmicutes    | Clostridia   | 0                   | 0                    | 0                   | 0                    |
| <b>seq1246</b> | Firmicutes    | Clostridia   | 0                   | 0                    | 0                   | 68                   |
| <b>seq1316</b> | Firmicutes    | Clostridia   | 0                   | 54                   | 0                   | 0                    |
| <b>seq190</b>  | Firmicutes    | Clostridia   | 145                 | 184                  | 0                   | 0                    |
| <b>seq552</b>  | Firmicutes    | Clostridia   | 0                   | 0                    | 0                   | 0                    |
| <b>seq781</b>  | Firmicutes    | Clostridia   | 0                   | 0                    | 0                   | 0                    |
| <b>seq1085</b> | Firmicutes    | Clostridia   | 0                   | 0                    | 0                   | 0                    |
| <b>seq1265</b> | Firmicutes    | Clostridia   | 0                   | 0                    | 0                   | 0                    |
| <b>seq1598</b> | Firmicutes    | Clostridia   | 0                   | 0                    | 0                   | 0                    |
| <b>seq1621</b> | Firmicutes    | Clostridia   | 0                   | 0                    | 0                   | 0                    |
| <b>seq1076</b> | Firmicutes    | Clostridia   | 0                   | 0                    | 0                   | 0                    |
| <b>seq283</b>  | Firmicutes    | Clostridia   | 0                   | 0                    | 0                   | 0                    |
| <b>seq941</b>  | Firmicutes    | Clostridia   | 24                  | 24                   | 0                   | 0                    |
| <b>seq1003</b> | Firmicutes    | Clostridia   | 16                  | 51                   | 0                   | 0                    |
| <b>seq1209</b> | Firmicutes    | Clostridia   | 0                   | 0                    | 0                   | 0                    |
| <b>seq1559</b> | Firmicutes    | Clostridia   | 0                   | 0                    | 0                   | 0                    |
| <b>seq172</b>  | Firmicutes    | Clostridia   | 0                   | 0                    | 0                   | 0                    |
| <b>seq737</b>  | Firmicutes    | Clostridia   | 0                   | 192                  | 0                   | 0                    |
| <b>seq738</b>  | Firmicutes    | Clostridia   | 0                   | 0                    | 0                   | 0                    |
| <b>seq225</b>  | Firmicutes    | Clostridia   | 34                  | 511                  | 265                 | 61                   |
| <b>seq1032</b> | Firmicutes    | Clostridia   | 0                   | 0                    | 0                   | 0                    |
| <b>seq1255</b> | Firmicutes    | Clostridia   | 0                   | 0                    | 0                   | 0                    |
| <b>seq25</b>   | Firmicutes    | Clostridia   | 1112                | 310                  | 261                 | 471                  |
| <b>seq29</b>   | Firmicutes    | Clostridia   | 158                 | 1008                 | 305                 | 582                  |
| <b>seq37</b>   | Firmicutes    | Clostridia   | 2146                | 4001                 | 26                  | 197                  |
| <b>seq44</b>   | Firmicutes    | Clostridia   | 2816                | 2554                 | 124                 | 200                  |
| <b>seq49</b>   | Firmicutes    | Clostridia   | 1694                | 1486                 | 146                 | 222                  |
| <b>seq52</b>   | Firmicutes    | Clostridia   | 5416                | 4245                 | 0                   | 0                    |
| <b>seq71</b>   | Firmicutes    | Clostridia   | 884                 | 1395                 | 0                   | 0                    |
| <b>seq82</b>   | Firmicutes    | Clostridia   | 0                   | 0                    | 0                   | 215                  |
| <b>seq94</b>   | Firmicutes    | Clostridia   | 0                   | 0                    | 97                  | 324                  |

Sequence Count Table

|                | <b>Phylum</b> | <b>Class</b> | <b>Subject7WK0</b> | <b>Subject7WK12</b> | <b>Subject21WK0</b> | <b>Subject21WK12</b> |
|----------------|---------------|--------------|--------------------|---------------------|---------------------|----------------------|
| <b>seq1144</b> | Firmicutes    | Clostridia   | 0                  | 0                   | 0                   | 0                    |
| <b>seq1173</b> | Firmicutes    | Clostridia   | 0                  | 0                   | 0                   | 0                    |
| <b>seq1246</b> | Firmicutes    | Clostridia   | 0                  | 0                   | 0                   | 0                    |
| <b>seq1316</b> | Firmicutes    | Clostridia   | 0                  | 0                   | 0                   | 0                    |
| <b>seq190</b>  | Firmicutes    | Clostridia   | 64                 | 39                  | 1723                | 1844                 |
| <b>seq552</b>  | Firmicutes    | Clostridia   | 0                  | 0                   | 309                 | 323                  |
| <b>seq781</b>  | Firmicutes    | Clostridia   | 0                  | 0                   | 0                   | 0                    |
| <b>seq1085</b> | Firmicutes    | Clostridia   | 0                  | 0                   | 12                  | 6                    |
| <b>seq1265</b> | Firmicutes    | Clostridia   | 0                  | 0                   | 0                   | 0                    |
| <b>seq1598</b> | Firmicutes    | Clostridia   | 0                  | 0                   | 0                   | 0                    |
| <b>seq1621</b> | Firmicutes    | Clostridia   | 0                  | 0                   | 0                   | 0                    |
| <b>seq1076</b> | Firmicutes    | Clostridia   | 0                  | 5                   | 0                   | 0                    |
| <b>seq283</b>  | Firmicutes    | Clostridia   | 507                | 96                  | 0                   | 0                    |
| <b>seq941</b>  | Firmicutes    | Clostridia   | 0                  | 0                   | 48                  | 42                   |
| <b>seq1003</b> | Firmicutes    | Clostridia   | 0                  | 0                   | 5                   | 33                   |
| <b>seq1209</b> | Firmicutes    | Clostridia   | 0                  | 0                   | 0                   | 0                    |
| <b>seq1559</b> | Firmicutes    | Clostridia   | 0                  | 0                   | 0                   | 0                    |
| <b>seq172</b>  | Firmicutes    | Clostridia   | 14                 | 176                 | 595                 | 2548                 |
| <b>seq737</b>  | Firmicutes    | Clostridia   | 0                  | 0                   | 0                   | 0                    |
| <b>seq738</b>  | Firmicutes    | Clostridia   | 0                  | 0                   | 0                   | 0                    |
| <b>seq225</b>  | Firmicutes    | Clostridia   | 0                  | 0                   | 11                  | 25                   |
| <b>seq1032</b> | Firmicutes    | Clostridia   | 0                  | 0                   | 0                   | 0                    |
| <b>seq1255</b> | Firmicutes    | Clostridia   | 0                  | 0                   | 0                   | 0                    |
| <b>seq25</b>   | Firmicutes    | Clostridia   | 0                  | 0                   | 0                   | 0                    |
| <b>seq29</b>   | Firmicutes    | Clostridia   | 2971               | 1468                | 4102                | 3736                 |
| <b>seq37</b>   | Firmicutes    | Clostridia   | 1347               | 1360                | 1907                | 4529                 |
| <b>seq44</b>   | Firmicutes    | Clostridia   | 0                  | 0                   | 0                   | 0                    |
| <b>seq49</b>   | Firmicutes    | Clostridia   | 565                | 258                 | 2888                | 2704                 |
| <b>seq52</b>   | Firmicutes    | Clostridia   | 1332               | 1248                | 2248                | 3355                 |
| <b>seq71</b>   | Firmicutes    | Clostridia   | 82                 | 179                 | 1201                | 7178                 |
| <b>seq82</b>   | Firmicutes    | Clostridia   | 0                  | 0                   | 0                   | 0                    |
| <b>seq94</b>   | Firmicutes    | Clostridia   | 0                  | 0                   | 0                   | 0                    |

Sequence Count Table

|                | <b>Phylum</b> | <b>Class</b> | <b>Subject8WK0</b> | <b>Subject8WK12</b> | <b>Subject9WK0</b> | <b>Subject9WK12</b> |
|----------------|---------------|--------------|--------------------|---------------------|--------------------|---------------------|
| <b>seq1144</b> | Firmicutes    | Clostridia   | 0                  | 0                   | 0                  | 0                   |
| <b>seq1173</b> | Firmicutes    | Clostridia   | 0                  | 0                   | 0                  | 0                   |
| <b>seq1246</b> | Firmicutes    | Clostridia   | 0                  | 0                   | 0                  | 0                   |
| <b>seq1316</b> | Firmicutes    | Clostridia   | 0                  | 0                   | 0                  | 0                   |
| <b>seq190</b>  | Firmicutes    | Clostridia   | 0                  | 0                   | 0                  | 0                   |
| <b>seq552</b>  | Firmicutes    | Clostridia   | 0                  | 0                   | 0                  | 0                   |
| <b>seq781</b>  | Firmicutes    | Clostridia   | 0                  | 0                   | 0                  | 0                   |
| <b>seq1085</b> | Firmicutes    | Clostridia   | 0                  | 0                   | 0                  | 0                   |
| <b>seq1265</b> | Firmicutes    | Clostridia   | 0                  | 0                   | 0                  | 0                   |
| <b>seq1598</b> | Firmicutes    | Clostridia   | 0                  | 0                   | 0                  | 0                   |
| <b>seq1621</b> | Firmicutes    | Clostridia   | 0                  | 0                   | 18                 | 0                   |
| <b>seq1076</b> | Firmicutes    | Clostridia   | 0                  | 0                   | 0                  | 0                   |
| <b>seq283</b>  | Firmicutes    | Clostridia   | 0                  | 0                   | 0                  | 0                   |
| <b>seq941</b>  | Firmicutes    | Clostridia   | 0                  | 0                   | 0                  | 0                   |
| <b>seq1003</b> | Firmicutes    | Clostridia   | 0                  | 0                   | 0                  | 0                   |
| <b>seq1209</b> | Firmicutes    | Clostridia   | 0                  | 0                   | 0                  | 0                   |
| <b>seq1559</b> | Firmicutes    | Clostridia   | 0                  | 0                   | 0                  | 0                   |
| <b>seq172</b>  | Firmicutes    | Clostridia   | 352                | 1505                | 0                  | 0                   |
| <b>seq737</b>  | Firmicutes    | Clostridia   | 0                  | 0                   | 83                 | 54                  |
| <b>seq738</b>  | Firmicutes    | Clostridia   | 0                  | 0                   | 0                  | 0                   |
| <b>seq225</b>  | Firmicutes    | Clostridia   | 0                  | 0                   | 0                  | 0                   |
| <b>seq1032</b> | Firmicutes    | Clostridia   | 0                  | 0                   | 0                  | 0                   |
| <b>seq1255</b> | Firmicutes    | Clostridia   | 0                  | 0                   | 17                 | 0                   |
| <b>seq25</b>   | Firmicutes    | Clostridia   | 518                | 484                 | 3574               | 4993                |
| <b>seq29</b>   | Firmicutes    | Clostridia   | 1316               | 2702                | 154                | 822                 |
| <b>seq37</b>   | Firmicutes    | Clostridia   | 317                | 573                 | 2587               | 568                 |
| <b>seq44</b>   | Firmicutes    | Clostridia   | 550                | 731                 | 0                  | 0                   |
| <b>seq49</b>   | Firmicutes    | Clostridia   | 208                | 338                 | 142                | 253                 |
| <b>seq52</b>   | Firmicutes    | Clostridia   | 370                | 23                  | 916                | 2650                |
| <b>seq71</b>   | Firmicutes    | Clostridia   | 0                  | 0                   | 172                | 3089                |
| <b>seq82</b>   | Firmicutes    | Clostridia   | 0                  | 17                  | 0                  | 0                   |
| <b>seq94</b>   | Firmicutes    | Clostridia   | 0                  | 0                   | 0                  | 0                   |

Sequence Count Table

|                | <b>Phylum</b> | <b>Class</b> | <b>Subject10WK0</b> | <b>Subject10WK12</b> | <b>Subject22WK0</b> | <b>Subject22WK12</b> |
|----------------|---------------|--------------|---------------------|----------------------|---------------------|----------------------|
| <b>seq1144</b> | Firmicutes    | Clostridia   | 0                   | 0                    | 0                   | 0                    |
| <b>seq1173</b> | Firmicutes    | Clostridia   | 0                   | 0                    | 0                   | 0                    |
| <b>seq1246</b> | Firmicutes    | Clostridia   | 0                   | 0                    | 0                   | 0                    |
| <b>seq1316</b> | Firmicutes    | Clostridia   | 0                   | 0                    | 0                   | 0                    |
| <b>seq190</b>  | Firmicutes    | Clostridia   | 63                  | 16                   | 0                   | 0                    |
| <b>seq552</b>  | Firmicutes    | Clostridia   | 0                   | 0                    | 0                   | 0                    |
| <b>seq781</b>  | Firmicutes    | Clostridia   | 0                   | 0                    | 0                   | 0                    |
| <b>seq1085</b> | Firmicutes    | Clostridia   | 0                   | 0                    | 0                   | 0                    |
| <b>seq1265</b> | Firmicutes    | Clostridia   | 0                   | 0                    | 0                   | 0                    |
| <b>seq1598</b> | Firmicutes    | Clostridia   | 0                   | 0                    | 0                   | 0                    |
| <b>seq1621</b> | Firmicutes    | Clostridia   | 0                   | 0                    | 0                   | 0                    |
| <b>seq1076</b> | Firmicutes    | Clostridia   | 0                   | 0                    | 0                   | 0                    |
| <b>seq283</b>  | Firmicutes    | Clostridia   | 960                 | 195                  | 0                   | 0                    |
| <b>seq941</b>  | Firmicutes    | Clostridia   | 0                   | 0                    | 0                   | 0                    |
| <b>seq1003</b> | Firmicutes    | Clostridia   | 0                   | 0                    | 0                   | 0                    |
| <b>seq1209</b> | Firmicutes    | Clostridia   | 0                   | 0                    | 0                   | 0                    |
| <b>seq1559</b> | Firmicutes    | Clostridia   | 0                   | 0                    | 0                   | 0                    |
| <b>seq172</b>  | Firmicutes    | Clostridia   | 0                   | 0                    | 0                   | 0                    |
| <b>seq737</b>  | Firmicutes    | Clostridia   | 0                   | 0                    | 0                   | 0                    |
| <b>seq738</b>  | Firmicutes    | Clostridia   | 0                   | 329                  | 0                   | 0                    |
| <b>seq225</b>  | Firmicutes    | Clostridia   | 0                   | 0                    | 0                   | 37                   |
| <b>seq1032</b> | Firmicutes    | Clostridia   | 0                   | 0                    | 0                   | 0                    |
| <b>seq1255</b> | Firmicutes    | Clostridia   | 0                   | 0                    | 0                   | 0                    |
| <b>seq25</b>   | Firmicutes    | Clostridia   | 0                   | 0                    | 842                 | 649                  |
| <b>seq29</b>   | Firmicutes    | Clostridia   | 0                   | 0                    | 671                 | 635                  |
| <b>seq37</b>   | Firmicutes    | Clostridia   | 1230                | 668                  | 0                   | 0                    |
| <b>seq44</b>   | Firmicutes    | Clostridia   | 1991                | 1663                 | 324                 | 217                  |
| <b>seq49</b>   | Firmicutes    | Clostridia   | 0                   | 0                    | 386                 | 403                  |
| <b>seq52</b>   | Firmicutes    | Clostridia   | 164                 | 256                  | 20                  | 0                    |
| <b>seq71</b>   | Firmicutes    | Clostridia   | 1071                | 701                  | 0                   | 0                    |
| <b>seq82</b>   | Firmicutes    | Clostridia   | 1575                | 852                  | 176                 | 68                   |
| <b>seq94</b>   | Firmicutes    | Clostridia   | 0                   | 0                    | 0                   | 0                    |

Sequence Count Table

|                | <b>Phylum</b> | <b>Class</b> | <b>Subject23WK0</b> | <b>Subject23WK12</b> | <b>Subject24WK0</b> | <b>Subject24WK12</b> |
|----------------|---------------|--------------|---------------------|----------------------|---------------------|----------------------|
| <b>seq1144</b> | Firmicutes    | Clostridia   | 0                   | 0                    | 0                   | 0                    |
| <b>seq1173</b> | Firmicutes    | Clostridia   | 0                   | 0                    | 88                  | 0                    |
| <b>seq1246</b> | Firmicutes    | Clostridia   | 0                   | 0                    | 0                   | 0                    |
| <b>seq1316</b> | Firmicutes    | Clostridia   | 0                   | 0                    | 0                   | 0                    |
| <b>seq190</b>  | Firmicutes    | Clostridia   | 0                   | 0                    | 0                   | 0                    |
| <b>seq552</b>  | Firmicutes    | Clostridia   | 0                   | 0                    | 0                   | 0                    |
| <b>seq781</b>  | Firmicutes    | Clostridia   | 0                   | 0                    | 0                   | 0                    |
| <b>seq1085</b> | Firmicutes    | Clostridia   | 0                   | 0                    | 0                   | 0                    |
| <b>seq1265</b> | Firmicutes    | Clostridia   | 0                   | 0                    | 0                   | 0                    |
| <b>seq1598</b> | Firmicutes    | Clostridia   | 0                   | 0                    | 0                   | 0                    |
| <b>seq1621</b> | Firmicutes    | Clostridia   | 0                   | 0                    | 0                   | 0                    |
| <b>seq1076</b> | Firmicutes    | Clostridia   | 0                   | 0                    | 0                   | 0                    |
| <b>seq283</b>  | Firmicutes    | Clostridia   | 0                   | 0                    | 0                   | 0                    |
| <b>seq941</b>  | Firmicutes    | Clostridia   | 0                   | 0                    | 0                   | 0                    |
| <b>seq1003</b> | Firmicutes    | Clostridia   | 0                   | 0                    | 0                   | 0                    |
| <b>seq1209</b> | Firmicutes    | Clostridia   | 0                   | 0                    | 0                   | 0                    |
| <b>seq1559</b> | Firmicutes    | Clostridia   | 0                   | 0                    | 0                   | 0                    |
| <b>seq172</b>  | Firmicutes    | Clostridia   | 0                   | 0                    | 0                   | 0                    |
| <b>seq737</b>  | Firmicutes    | Clostridia   | 0                   | 0                    | 0                   | 0                    |
| <b>seq738</b>  | Firmicutes    | Clostridia   | 0                   | 0                    | 0                   | 0                    |
| <b>seq225</b>  | Firmicutes    | Clostridia   | 0                   | 0                    | 0                   | 0                    |
| <b>seq1032</b> | Firmicutes    | Clostridia   | 0                   | 0                    | 0                   | 0                    |
| <b>seq1255</b> | Firmicutes    | Clostridia   | 0                   | 0                    | 0                   | 0                    |
| <b>seq25</b>   | Firmicutes    | Clostridia   | 528                 | 794                  | 1196                | 2247                 |
| <b>seq29</b>   | Firmicutes    | Clostridia   | 246                 | 278                  | 496                 | 618                  |
| <b>seq37</b>   | Firmicutes    | Clostridia   | 236                 | 139                  | 27                  | 95                   |
| <b>seq44</b>   | Firmicutes    | Clostridia   | 477                 | 481                  | 1121                | 1808                 |
| <b>seq49</b>   | Firmicutes    | Clostridia   | 0                   | 0                    | 656                 | 797                  |
| <b>seq52</b>   | Firmicutes    | Clostridia   | 0                   | 0                    | 0                   | 0                    |
| <b>seq71</b>   | Firmicutes    | Clostridia   | 0                   | 0                    | 0                   | 0                    |
| <b>seq82</b>   | Firmicutes    | Clostridia   | 343                 | 404                  | 2139                | 721                  |
| <b>seq94</b>   | Firmicutes    | Clostridia   | 498                 | 330                  | 469                 | 0                    |

Sequence Count Table

|                | <b>Phylum</b> | <b>Class</b> | <b>Subject11WK0</b> | <b>Subject11WK12</b> | <b>Subject12WK0</b> | <b>Subject12WK12</b> |
|----------------|---------------|--------------|---------------------|----------------------|---------------------|----------------------|
| <b>seq1144</b> | Firmicutes    | Clostridia   | 0                   | 0                    | 0                   | 0                    |
| <b>seq1173</b> | Firmicutes    | Clostridia   | 0                   | 0                    | 0                   | 0                    |
| <b>seq1246</b> | Firmicutes    | Clostridia   | 0                   | 0                    | 0                   | 0                    |
| <b>seq1316</b> | Firmicutes    | Clostridia   | 0                   | 0                    | 0                   | 0                    |
| <b>seq190</b>  | Firmicutes    | Clostridia   | 319                 | 228                  | 0                   | 0                    |
| <b>seq552</b>  | Firmicutes    | Clostridia   | 0                   | 0                    | 0                   | 0                    |
| <b>seq781</b>  | Firmicutes    | Clostridia   | 0                   | 0                    | 0                   | 0                    |
| <b>seq1085</b> | Firmicutes    | Clostridia   | 0                   | 0                    | 0                   | 0                    |
| <b>seq1265</b> | Firmicutes    | Clostridia   | 0                   | 0                    | 0                   | 0                    |
| <b>seq1598</b> | Firmicutes    | Clostridia   | 0                   | 0                    | 0                   | 0                    |
| <b>seq1621</b> | Firmicutes    | Clostridia   | 0                   | 0                    | 0                   | 0                    |
| <b>seq1076</b> | Firmicutes    | Clostridia   | 0                   | 0                    | 0                   | 0                    |
| <b>seq283</b>  | Firmicutes    | Clostridia   | 0                   | 0                    | 0                   | 0                    |
| <b>seq941</b>  | Firmicutes    | Clostridia   | 0                   | 0                    | 0                   | 0                    |
| <b>seq1003</b> | Firmicutes    | Clostridia   | 9                   | 0                    | 0                   | 0                    |
| <b>seq1209</b> | Firmicutes    | Clostridia   | 0                   | 0                    | 0                   | 0                    |
| <b>seq1559</b> | Firmicutes    | Clostridia   | 0                   | 0                    | 0                   | 0                    |
| <b>seq172</b>  | Firmicutes    | Clostridia   | 0                   | 0                    | 0                   | 0                    |
| <b>seq737</b>  | Firmicutes    | Clostridia   | 0                   | 0                    | 0                   | 0                    |
| <b>seq738</b>  | Firmicutes    | Clostridia   | 0                   | 0                    | 0                   | 0                    |
| <b>seq225</b>  | Firmicutes    | Clostridia   | 244                 | 421                  | 0                   | 0                    |
| <b>seq1032</b> | Firmicutes    | Clostridia   | 59                  | 71                   | 0                   | 0                    |
| <b>seq1255</b> | Firmicutes    | Clostridia   | 0                   | 0                    | 0                   | 0                    |
| <b>seq25</b>   | Firmicutes    | Clostridia   | 0                   | 0                    | 369                 | 1104                 |
| <b>seq29</b>   | Firmicutes    | Clostridia   | 0                   | 0                    | 817                 | 1988                 |
| <b>seq37</b>   | Firmicutes    | Clostridia   | 191                 | 67                   | 41                  | 177                  |
| <b>seq44</b>   | Firmicutes    | Clostridia   | 3474                | 3473                 | 351                 | 504                  |
| <b>seq49</b>   | Firmicutes    | Clostridia   | 0                   | 0                    | 105                 | 182                  |
| <b>seq52</b>   | Firmicutes    | Clostridia   | 429                 | 617                  | 0                   | 60                   |
| <b>seq71</b>   | Firmicutes    | Clostridia   | 0                   | 0                    | 0                   | 0                    |
| <b>seq82</b>   | Firmicutes    | Clostridia   | 0                   | 0                    | 712                 | 627                  |
| <b>seq94</b>   | Firmicutes    | Clostridia   | 0                   | 0                    | 0                   | 0                    |

Sequence Count Table

|                | <b>Phylum</b> | <b>Class</b> | <b>Subject25WK0</b> | <b>Subject25WK12</b> | <b>Subject38WK0</b> | <b>Subject38WK12</b> |
|----------------|---------------|--------------|---------------------|----------------------|---------------------|----------------------|
| <b>seq1144</b> | Firmicutes    | Clostridia   | 0                   | 0                    | 0                   | 0                    |
| <b>seq1173</b> | Firmicutes    | Clostridia   | 0                   | 0                    | 0                   | 0                    |
| <b>seq1246</b> | Firmicutes    | Clostridia   | 0                   | 0                    | 0                   | 0                    |
| <b>seq1316</b> | Firmicutes    | Clostridia   | 0                   | 0                    | 0                   | 0                    |
| <b>seq190</b>  | Firmicutes    | Clostridia   | 0                   | 0                    | 0                   | 0                    |
| <b>seq552</b>  | Firmicutes    | Clostridia   | 0                   | 0                    | 0                   | 0                    |
| <b>seq781</b>  | Firmicutes    | Clostridia   | 0                   | 0                    | 0                   | 0                    |
| <b>seq1085</b> | Firmicutes    | Clostridia   | 0                   | 0                    | 0                   | 0                    |
| <b>seq1265</b> | Firmicutes    | Clostridia   | 0                   | 0                    | 0                   | 0                    |
| <b>seq1598</b> | Firmicutes    | Clostridia   | 20                  | 0                    | 0                   | 0                    |
| <b>seq1621</b> | Firmicutes    | Clostridia   | 0                   | 0                    | 0                   | 0                    |
| <b>seq1076</b> | Firmicutes    | Clostridia   | 17                  | 0                    | 0                   | 0                    |
| <b>seq283</b>  | Firmicutes    | Clostridia   | 0                   | 0                    | 0                   | 0                    |
| <b>seq941</b>  | Firmicutes    | Clostridia   | 0                   | 0                    | 0                   | 0                    |
| <b>seq1003</b> | Firmicutes    | Clostridia   | 0                   | 0                    | 0                   | 0                    |
| <b>seq1209</b> | Firmicutes    | Clostridia   | 0                   | 0                    | 0                   | 0                    |
| <b>seq1559</b> | Firmicutes    | Clostridia   | 0                   | 0                    | 0                   | 0                    |
| <b>seq172</b>  | Firmicutes    | Clostridia   | 0                   | 0                    | 0                   | 0                    |
| <b>seq737</b>  | Firmicutes    | Clostridia   | 0                   | 0                    | 0                   | 0                    |
| <b>seq738</b>  | Firmicutes    | Clostridia   | 0                   | 0                    | 0                   | 0                    |
| <b>seq225</b>  | Firmicutes    | Clostridia   | 0                   | 0                    | 0                   | 0                    |
| <b>seq1032</b> | Firmicutes    | Clostridia   | 0                   | 0                    | 0                   | 0                    |
| <b>seq1255</b> | Firmicutes    | Clostridia   | 0                   | 0                    | 0                   | 0                    |
| <b>seq25</b>   | Firmicutes    | Clostridia   | 1313                | 415                  | 0                   | 0                    |
| <b>seq29</b>   | Firmicutes    | Clostridia   | 661                 | 958                  | 0                   | 0                    |
| <b>seq37</b>   | Firmicutes    | Clostridia   | 272                 | 440                  | 0                   | 0                    |
| <b>seq44</b>   | Firmicutes    | Clostridia   | 1149                | 791                  | 0                   | 0                    |
| <b>seq49</b>   | Firmicutes    | Clostridia   | 753                 | 1192                 | 0                   | 0                    |
| <b>seq52</b>   | Firmicutes    | Clostridia   | 20                  | 63                   | 0                   | 0                    |
| <b>seq71</b>   | Firmicutes    | Clostridia   | 0                   | 0                    | 0                   | 0                    |
| <b>seq82</b>   | Firmicutes    | Clostridia   | 0                   | 0                    | 0                   | 0                    |
| <b>seq94</b>   | Firmicutes    | Clostridia   | 0                   | 0                    | 0                   | 0                    |

Sequence Count Table

|                | <b>Phylum</b> | <b>Class</b> | <b>Subject31WK0</b> | <b>Subject31WK12</b> | <b>Subject32WK0</b> | <b>Subject32WK12</b> |
|----------------|---------------|--------------|---------------------|----------------------|---------------------|----------------------|
| <b>seq1144</b> | Firmicutes    | Clostridia   | 0                   | 0                    | 0                   | 0                    |
| <b>seq1173</b> | Firmicutes    | Clostridia   | 0                   | 0                    | 0                   | 0                    |
| <b>seq1246</b> | Firmicutes    | Clostridia   | 0                   | 0                    | 0                   | 0                    |
| <b>seq1316</b> | Firmicutes    | Clostridia   | 0                   | 0                    | 0                   | 0                    |
| <b>seq190</b>  | Firmicutes    | Clostridia   | 0                   | 0                    | 372                 | 0                    |
| <b>seq552</b>  | Firmicutes    | Clostridia   | 0                   | 0                    | 0                   | 0                    |
| <b>seq781</b>  | Firmicutes    | Clostridia   | 0                   | 0                    | 92                  | 0                    |
| <b>seq1085</b> | Firmicutes    | Clostridia   | 0                   | 0                    | 0                   | 0                    |
| <b>seq1265</b> | Firmicutes    | Clostridia   | 0                   | 0                    | 0                   | 0                    |
| <b>seq1598</b> | Firmicutes    | Clostridia   | 0                   | 0                    | 0                   | 0                    |
| <b>seq1621</b> | Firmicutes    | Clostridia   | 0                   | 0                    | 0                   | 0                    |
| <b>seq1076</b> | Firmicutes    | Clostridia   | 0                   | 0                    | 0                   | 0                    |
| <b>seq283</b>  | Firmicutes    | Clostridia   | 0                   | 0                    | 0                   | 0                    |
| <b>seq941</b>  | Firmicutes    | Clostridia   | 0                   | 0                    | 0                   | 0                    |
| <b>seq1003</b> | Firmicutes    | Clostridia   | 0                   | 0                    | 0                   | 0                    |
| <b>seq1209</b> | Firmicutes    | Clostridia   | 0                   | 0                    | 0                   | 0                    |
| <b>seq1559</b> | Firmicutes    | Clostridia   | 0                   | 0                    | 0                   | 0                    |
| <b>seq172</b>  | Firmicutes    | Clostridia   | 0                   | 0                    | 633                 | 31                   |
| <b>seq737</b>  | Firmicutes    | Clostridia   | 0                   | 0                    | 0                   | 0                    |
| <b>seq738</b>  | Firmicutes    | Clostridia   | 0                   | 0                    | 0                   | 0                    |
| <b>seq225</b>  | Firmicutes    | Clostridia   | 0                   | 0                    | 0                   | 0                    |
| <b>seq1032</b> | Firmicutes    | Clostridia   | 0                   | 0                    | 0                   | 0                    |
| <b>seq1255</b> | Firmicutes    | Clostridia   | 0                   | 0                    | 0                   | 0                    |
| <b>seq25</b>   | Firmicutes    | Clostridia   | 0                   | 0                    | 1458                | 0                    |
| <b>seq29</b>   | Firmicutes    | Clostridia   | 0                   | 0                    | 931                 | 19                   |
| <b>seq37</b>   | Firmicutes    | Clostridia   | 0                   | 0                    | 193                 | 0                    |
| <b>seq44</b>   | Firmicutes    | Clostridia   | 0                   | 0                    | 828                 | 0                    |
| <b>seq49</b>   | Firmicutes    | Clostridia   | 0                   | 0                    | 0                   | 0                    |
| <b>seq52</b>   | Firmicutes    | Clostridia   | 0                   | 0                    | 89                  | 0                    |
| <b>seq71</b>   | Firmicutes    | Clostridia   | 0                   | 0                    | 0                   | 0                    |
| <b>seq82</b>   | Firmicutes    | Clostridia   | 0                   | 0                    | 0                   | 0                    |
| <b>seq94</b>   | Firmicutes    | Clostridia   | 0                   | 0                    | 851                 | 0                    |



Sequence Count Table

|                | <b>Phylum</b> | <b>Class</b> | <b>Subject13WK0</b> | <b>Subject13WK12</b> | <b>Subject39WK0</b> | <b>Subject39WK12</b> |
|----------------|---------------|--------------|---------------------|----------------------|---------------------|----------------------|
| <b>seq1144</b> | Firmicutes    | Clostridia   | 0                   | 0                    | 0                   | 0                    |
| <b>seq1173</b> | Firmicutes    | Clostridia   | 0                   | 0                    | 0                   | 0                    |
| <b>seq1246</b> | Firmicutes    | Clostridia   | 0                   | 0                    | 0                   | 0                    |
| <b>seq1316</b> | Firmicutes    | Clostridia   | 0                   | 0                    | 0                   | 0                    |
| <b>seq190</b>  | Firmicutes    | Clostridia   | 72                  | 34                   | 0                   | 0                    |
| <b>seq552</b>  | Firmicutes    | Clostridia   | 0                   | 0                    | 0                   | 0                    |
| <b>seq781</b>  | Firmicutes    | Clostridia   | 0                   | 0                    | 0                   | 0                    |
| <b>seq1085</b> | Firmicutes    | Clostridia   | 0                   | 0                    | 0                   | 0                    |
| <b>seq1265</b> | Firmicutes    | Clostridia   | 0                   | 0                    | 0                   | 0                    |
| <b>seq1598</b> | Firmicutes    | Clostridia   | 0                   | 0                    | 0                   | 0                    |
| <b>seq1621</b> | Firmicutes    | Clostridia   | 0                   | 0                    | 0                   | 0                    |
| <b>seq1076</b> | Firmicutes    | Clostridia   | 16                  | 0                    | 0                   | 0                    |
| <b>seq283</b>  | Firmicutes    | Clostridia   | 0                   | 0                    | 0                   | 0                    |
| <b>seq941</b>  | Firmicutes    | Clostridia   | 0                   | 0                    | 0                   | 0                    |
| <b>seq1003</b> | Firmicutes    | Clostridia   | 0                   | 0                    | 0                   | 0                    |
| <b>seq1209</b> | Firmicutes    | Clostridia   | 0                   | 0                    | 0                   | 0                    |
| <b>seq1559</b> | Firmicutes    | Clostridia   | 23                  | 0                    | 0                   | 0                    |
| <b>seq172</b>  | Firmicutes    | Clostridia   | 0                   | 0                    | 0                   | 0                    |
| <b>seq737</b>  | Firmicutes    | Clostridia   | 0                   | 0                    | 0                   | 0                    |
| <b>seq738</b>  | Firmicutes    | Clostridia   | 0                   | 0                    | 0                   | 0                    |
| <b>seq225</b>  | Firmicutes    | Clostridia   | 0                   | 0                    | 0                   | 0                    |
| <b>seq1032</b> | Firmicutes    | Clostridia   | 0                   | 0                    | 0                   | 0                    |
| <b>seq1255</b> | Firmicutes    | Clostridia   | 0                   | 0                    | 0                   | 0                    |
| <b>seq25</b>   | Firmicutes    | Clostridia   | 710                 | 610                  | 0                   | 571                  |
| <b>seq29</b>   | Firmicutes    | Clostridia   | 891                 | 702                  | 0                   | 465                  |
| <b>seq37</b>   | Firmicutes    | Clostridia   | 33                  | 217                  | 0                   | 945                  |
| <b>seq44</b>   | Firmicutes    | Clostridia   | 479                 | 171                  | 0                   | 468                  |
| <b>seq49</b>   | Firmicutes    | Clostridia   | 205                 | 129                  | 0                   | 108                  |
| <b>seq52</b>   | Firmicutes    | Clostridia   | 68                  | 0                    | 0                   | 94                   |
| <b>seq71</b>   | Firmicutes    | Clostridia   | 0                   | 0                    | 0                   | 156                  |
| <b>seq82</b>   | Firmicutes    | Clostridia   | 143                 | 484                  | 0                   | 0                    |
| <b>seq94</b>   | Firmicutes    | Clostridia   | 0                   | 0                    | 0                   | 0                    |

Sequence Count Table

|                | <b>Phylum</b> | <b>Class</b> | <b>Subject26WK0</b> | <b>Subject26WK12</b> | <b>Subject14WK0</b> | <b>Subject14WK12</b> |
|----------------|---------------|--------------|---------------------|----------------------|---------------------|----------------------|
| <b>seq1144</b> | Firmicutes    | Clostridia   | 0                   | 0                    | 0                   | 0                    |
| <b>seq1173</b> | Firmicutes    | Clostridia   | 0                   | 0                    | 0                   | 0                    |
| <b>seq1246</b> | Firmicutes    | Clostridia   | 0                   | 0                    | 0                   | 0                    |
| <b>seq1316</b> | Firmicutes    | Clostridia   | 0                   | 0                    | 0                   | 0                    |
| <b>seq190</b>  | Firmicutes    | Clostridia   | 27                  | 29                   | 0                   | 0                    |
| <b>seq552</b>  | Firmicutes    | Clostridia   | 0                   | 0                    | 0                   | 0                    |
| <b>seq781</b>  | Firmicutes    | Clostridia   | 0                   | 0                    | 0                   | 0                    |
| <b>seq1085</b> | Firmicutes    | Clostridia   | 0                   | 0                    | 0                   | 0                    |
| <b>seq1265</b> | Firmicutes    | Clostridia   | 0                   | 0                    | 0                   | 0                    |
| <b>seq1598</b> | Firmicutes    | Clostridia   | 0                   | 0                    | 0                   | 0                    |
| <b>seq1621</b> | Firmicutes    | Clostridia   | 0                   | 0                    | 0                   | 0                    |
| <b>seq1076</b> | Firmicutes    | Clostridia   | 0                   | 0                    | 13                  | 21                   |
| <b>seq283</b>  | Firmicutes    | Clostridia   | 10                  | 319                  | 0                   | 0                    |
| <b>seq941</b>  | Firmicutes    | Clostridia   | 0                   | 0                    | 0                   | 0                    |
| <b>seq1003</b> | Firmicutes    | Clostridia   | 0                   | 0                    | 0                   | 0                    |
| <b>seq1209</b> | Firmicutes    | Clostridia   | 0                   | 0                    | 0                   | 0                    |
| <b>seq1559</b> | Firmicutes    | Clostridia   | 0                   | 0                    | 0                   | 0                    |
| <b>seq172</b>  | Firmicutes    | Clostridia   | 0                   | 0                    | 0                   | 0                    |
| <b>seq737</b>  | Firmicutes    | Clostridia   | 0                   | 0                    | 0                   | 0                    |
| <b>seq738</b>  | Firmicutes    | Clostridia   | 0                   | 0                    | 0                   | 0                    |
| <b>seq225</b>  | Firmicutes    | Clostridia   | 0                   | 0                    | 0                   | 1030                 |
| <b>seq1032</b> | Firmicutes    | Clostridia   | 0                   | 0                    | 0                   | 0                    |
| <b>seq1255</b> | Firmicutes    | Clostridia   | 18                  | 14                   | 0                   | 0                    |
| <b>seq25</b>   | Firmicutes    | Clostridia   | 0                   | 0                    | 627                 | 436                  |
| <b>seq29</b>   | Firmicutes    | Clostridia   | 3017                | 1858                 | 380                 | 574                  |
| <b>seq37</b>   | Firmicutes    | Clostridia   | 1067                | 9226                 | 338                 | 1265                 |
| <b>seq44</b>   | Firmicutes    | Clostridia   | 3206                | 1651                 | 312                 | 1540                 |
| <b>seq49</b>   | Firmicutes    | Clostridia   | 3446                | 2020                 | 507                 | 1243                 |
| <b>seq52</b>   | Firmicutes    | Clostridia   | 284                 | 1009                 | 0                   | 0                    |
| <b>seq71</b>   | Firmicutes    | Clostridia   | 812                 | 772                  | 0                   | 0                    |
| <b>seq82</b>   | Firmicutes    | Clostridia   | 0                   | 0                    | 260                 | 469                  |
| <b>seq94</b>   | Firmicutes    | Clostridia   | 0                   | 0                    | 249                 | 404                  |

Sequence Count Table

|                | <b>Phylum</b> | <b>Class</b> | <b>Subject27WK0</b> | <b>Subject27WK12</b> | <b>Subject15WK0</b> | <b>Subject15WK12</b> |
|----------------|---------------|--------------|---------------------|----------------------|---------------------|----------------------|
| <b>seq1144</b> | Firmicutes    | Clostridia   | 0                   | 94                   | 0                   | 0                    |
| <b>seq1173</b> | Firmicutes    | Clostridia   | 0                   | 0                    | 0                   | 0                    |
| <b>seq1246</b> | Firmicutes    | Clostridia   | 0                   | 0                    | 0                   | 0                    |
| <b>seq1316</b> | Firmicutes    | Clostridia   | 0                   | 0                    | 0                   | 0                    |
| <b>seq190</b>  | Firmicutes    | Clostridia   | 0                   | 0                    | 0                   | 0                    |
| <b>seq552</b>  | Firmicutes    | Clostridia   | 0                   | 0                    | 0                   | 0                    |
| <b>seq781</b>  | Firmicutes    | Clostridia   | 0                   | 0                    | 0                   | 0                    |
| <b>seq1085</b> | Firmicutes    | Clostridia   | 0                   | 0                    | 0                   | 0                    |
| <b>seq1265</b> | Firmicutes    | Clostridia   | 0                   | 0                    | 0                   | 0                    |
| <b>seq1598</b> | Firmicutes    | Clostridia   | 0                   | 0                    | 0                   | 0                    |
| <b>seq1621</b> | Firmicutes    | Clostridia   | 0                   | 0                    | 0                   | 0                    |
| <b>seq1076</b> | Firmicutes    | Clostridia   | 0                   | 0                    | 0                   | 0                    |
| <b>seq283</b>  | Firmicutes    | Clostridia   | 0                   | 0                    | 0                   | 0                    |
| <b>seq941</b>  | Firmicutes    | Clostridia   | 0                   | 0                    | 0                   | 0                    |
| <b>seq1003</b> | Firmicutes    | Clostridia   | 11                  | 0                    | 0                   | 0                    |
| <b>seq1209</b> | Firmicutes    | Clostridia   | 0                   | 0                    | 0                   | 33                   |
| <b>seq1559</b> | Firmicutes    | Clostridia   | 0                   | 0                    | 0                   | 0                    |
| <b>seq172</b>  | Firmicutes    | Clostridia   | 0                   | 0                    | 194                 | 262                  |
| <b>seq737</b>  | Firmicutes    | Clostridia   | 0                   | 0                    | 0                   | 0                    |
| <b>seq738</b>  | Firmicutes    | Clostridia   | 0                   | 0                    | 0                   | 0                    |
| <b>seq225</b>  | Firmicutes    | Clostridia   | 28                  | 25                   | 0                   | 0                    |
| <b>seq1032</b> | Firmicutes    | Clostridia   | 0                   | 0                    | 0                   | 0                    |
| <b>seq1255</b> | Firmicutes    | Clostridia   | 0                   | 0                    | 0                   | 0                    |
| <b>seq25</b>   | Firmicutes    | Clostridia   | 713                 | 646                  | 610                 | 3406                 |
| <b>seq29</b>   | Firmicutes    | Clostridia   | 228                 | 241                  | 1009                | 975                  |
| <b>seq37</b>   | Firmicutes    | Clostridia   | 727                 | 421                  | 1165                | 2589                 |
| <b>seq44</b>   | Firmicutes    | Clostridia   | 988                 | 836                  | 772                 | 444                  |
| <b>seq49</b>   | Firmicutes    | Clostridia   | 291                 | 368                  | 192                 | 204                  |
| <b>seq52</b>   | Firmicutes    | Clostridia   | 205                 | 269                  | 168                 | 865                  |
| <b>seq71</b>   | Firmicutes    | Clostridia   | 48                  | 39                   | 42                  | 240                  |
| <b>seq82</b>   | Firmicutes    | Clostridia   | 254                 | 183                  | 83                  | 28                   |
| <b>seq94</b>   | Firmicutes    | Clostridia   | 0                   | 0                    | 499                 | 932                  |

Sequence Count Table

|                | <b>Phylum</b> | <b>Class</b> | <b>Δ</b> |  |   |  |
|----------------|---------------|--------------|----------|--|---|--|
| <b>seq1144</b> | Firmicutes    | Clostridia   |          |  |   |  |
| <b>seq1173</b> | Firmicutes    | Clostridia   |          |  |   |  |
| <b>seq1246</b> | Firmicutes    | Clostridia   |          |  |   |  |
| <b>seq1316</b> | Firmicutes    | Clostridia   |          |  |   |  |
| <b>seq190</b>  | Firmicutes    | Clostridia   |          |  |   |  |
| <b>seq552</b>  | Firmicutes    | Clostridia   |          |  |   |  |
| <b>seq781</b>  | Firmicutes    | Clostridia   |          |  |   |  |
| <b>seq1085</b> | Firmicutes    | Clostridia   |          |  |   |  |
| <b>seq1265</b> | Firmicutes    | Clostridia   |          |  |   |  |
| <b>seq1598</b> | Firmicutes    | Clostridia   |          |  |   |  |
| <b>seq1621</b> | Firmicutes    | Clostridia   |          |  |   |  |
| <b>seq1076</b> | Firmicutes    | Clostridia   |          |  |   |  |
| <b>seq283</b>  | Firmicutes    | Clostridia   |          |  |   |  |
| <b>seq941</b>  | Firmicutes    | Clostridia   |          |  |   |  |
| <b>seq1003</b> | Firmicutes    | Clostridia   |          |  |   |  |
| <b>seq1209</b> | Firmicutes    | Clostridia   |          |  |   |  |
| <b>seq1559</b> | Firmicutes    | Clostridia   |          |  |   |  |
| <b>seq172</b>  | Firmicutes    | Clostridia   |          |  |   |  |
| <b>seq737</b>  | Firmicutes    | Clostridia   |          |  |   |  |
| <b>seq738</b>  | Firmicutes    | Clostridia   |          |  |   |  |
| <b>seq225</b>  | Firmicutes    | Clostridia   |          |  |   |  |
| <b>seq1032</b> | Firmicutes    | Clostridia   |          |  |   |  |
| <b>seq1255</b> | Firmicutes    | Clostridia   |          |  |   |  |
| <b>seq25</b>   | Firmicutes    | Clostridia   |          |  | \ |  |
| <b>seq29</b>   | Firmicutes    | Clostridia   |          |  |   |  |
| <b>seq37</b>   | Firmicutes    | Clostridia   |          |  |   |  |
| <b>seq44</b>   | Firmicutes    | Clostridia   |          |  |   |  |
| <b>seq49</b>   | Firmicutes    | Clostridia   |          |  |   |  |
| <b>seq52</b>   | Firmicutes    | Clostridia   |          |  |   |  |
| <b>seq71</b>   | Firmicutes    | Clostridia   |          |  |   |  |
| <b>seq82</b>   | Firmicutes    | Clostridia   |          |  |   |  |
| <b>seq94</b>   | Firmicutes    | Clostridia   |          |  |   |  |

Sequence Count Table

|               | <b>Phylum</b> | <b>Class</b> | <b>Order</b>  | <b>Family</b>   |
|---------------|---------------|--------------|---------------|-----------------|
| <b>seq95</b>  | Firmicutes    | Clostridia   | Clostridiales | Lachnospiraceae |
| <b>seq99</b>  | Firmicutes    | Clostridia   | Clostridiales | Lachnospiraceae |
| <b>seq101</b> | Firmicutes    | Clostridia   | Clostridiales | Lachnospiraceae |
| <b>seq119</b> | Firmicutes    | Clostridia   | Clostridiales | Lachnospiraceae |
| <b>seq122</b> | Firmicutes    | Clostridia   | Clostridiales | Lachnospiraceae |
| <b>seq128</b> | Firmicutes    | Clostridia   | Clostridiales | Lachnospiraceae |
| <b>seq129</b> | Firmicutes    | Clostridia   | Clostridiales | Lachnospiraceae |
| <b>seq138</b> | Firmicutes    | Clostridia   | Clostridiales | Lachnospiraceae |
| <b>seq171</b> | Firmicutes    | Clostridia   | Clostridiales | Lachnospiraceae |
| <b>seq202</b> | Firmicutes    | Clostridia   | Clostridiales | Lachnospiraceae |
| <b>seq203</b> | Firmicutes    | Clostridia   | Clostridiales | Lachnospiraceae |
| <b>seq226</b> | Firmicutes    | Clostridia   | Clostridiales | Lachnospiraceae |
| <b>seq235</b> | Firmicutes    | Clostridia   | Clostridiales | Lachnospiraceae |
| <b>seq239</b> | Firmicutes    | Clostridia   | Clostridiales | Lachnospiraceae |
| <b>seq243</b> | Firmicutes    | Clostridia   | Clostridiales | Lachnospiraceae |
| <b>seq249</b> | Firmicutes    | Clostridia   | Clostridiales | Lachnospiraceae |
| <b>seq255</b> | Firmicutes    | Clostridia   | Clostridiales | Lachnospiraceae |
| <b>seq263</b> | Firmicutes    | Clostridia   | Clostridiales | Lachnospiraceae |
| <b>seq272</b> | Firmicutes    | Clostridia   | Clostridiales | Lachnospiraceae |
| <b>seq273</b> | Firmicutes    | Clostridia   | Clostridiales | Lachnospiraceae |
| <b>seq276</b> | Firmicutes    | Clostridia   | Clostridiales | Lachnospiraceae |
| <b>seq290</b> | Firmicutes    | Clostridia   | Clostridiales | Lachnospiraceae |
| <b>seq292</b> | Firmicutes    | Clostridia   | Clostridiales | Lachnospiraceae |
| <b>seq293</b> | Firmicutes    | Clostridia   | Clostridiales | Lachnospiraceae |
| <b>seq298</b> | Firmicutes    | Clostridia   | Clostridiales | Lachnospiraceae |
| <b>seq302</b> | Firmicutes    | Clostridia   | Clostridiales | Lachnospiraceae |
| <b>seq318</b> | Firmicutes    | Clostridia   | Clostridiales | Lachnospiraceae |
| <b>seq323</b> | Firmicutes    | Clostridia   | Clostridiales | Lachnospiraceae |
| <b>seq325</b> | Firmicutes    | Clostridia   | Clostridiales | Lachnospiraceae |
| <b>seq328</b> | Firmicutes    | Clostridia   | Clostridiales | Lachnospiraceae |
| <b>seq329</b> | Firmicutes    | Clostridia   | Clostridiales | Lachnospiraceae |
| <b>seq337</b> | Firmicutes    | Clostridia   | Clostridiales | Lachnospiraceae |

Sequence Count Table

|               | <b>Phylum</b> | <b>Class</b> | <b>Genus</b> | <b>Species</b> |
|---------------|---------------|--------------|--------------|----------------|
| <b>seq95</b>  | Firmicutes    | Clostridia   |              |                |
| <b>seq99</b>  | Firmicutes    | Clostridia   |              |                |
| <b>seq101</b> | Firmicutes    | Clostridia   |              |                |
| <b>seq119</b> | Firmicutes    | Clostridia   |              |                |
| <b>seq122</b> | Firmicutes    | Clostridia   |              |                |
| <b>seq128</b> | Firmicutes    | Clostridia   |              |                |
| <b>seq129</b> | Firmicutes    | Clostridia   |              |                |
| <b>seq138</b> | Firmicutes    | Clostridia   |              |                |
| <b>seq171</b> | Firmicutes    | Clostridia   |              |                |
| <b>seq202</b> | Firmicutes    | Clostridia   |              |                |
| <b>seq203</b> | Firmicutes    | Clostridia   |              |                |
| <b>seq226</b> | Firmicutes    | Clostridia   |              |                |
| <b>seq235</b> | Firmicutes    | Clostridia   |              |                |
| <b>seq239</b> | Firmicutes    | Clostridia   |              |                |
| <b>seq243</b> | Firmicutes    | Clostridia   |              |                |
| <b>seq249</b> | Firmicutes    | Clostridia   |              |                |
| <b>seq255</b> | Firmicutes    | Clostridia   |              |                |
| <b>seq263</b> | Firmicutes    | Clostridia   |              |                |
| <b>seq272</b> | Firmicutes    | Clostridia   |              |                |
| <b>seq273</b> | Firmicutes    | Clostridia   |              |                |
| <b>seq276</b> | Firmicutes    | Clostridia   |              |                |
| <b>seq290</b> | Firmicutes    | Clostridia   |              |                |
| <b>seq292</b> | Firmicutes    | Clostridia   |              |                |
| <b>seq293</b> | Firmicutes    | Clostridia   |              |                |
| <b>seq298</b> | Firmicutes    | Clostridia   |              |                |
| <b>seq302</b> | Firmicutes    | Clostridia   |              |                |
| <b>seq318</b> | Firmicutes    | Clostridia   |              |                |
| <b>seq323</b> | Firmicutes    | Clostridia   |              |                |
| <b>seq325</b> | Firmicutes    | Clostridia   |              |                |
| <b>seq328</b> | Firmicutes    | Clostridia   |              |                |
| <b>seq329</b> | Firmicutes    | Clostridia   |              |                |
| <b>seq337</b> | Firmicutes    | Clostridia   |              |                |

Sequence Count Table

|               | <b>Phylum</b> | <b>Class</b> | <b>Subject34WK0</b> | <b>Subject34WK12</b> | <b>Subject16WK0</b> | <b>Subject16WK12</b> |
|---------------|---------------|--------------|---------------------|----------------------|---------------------|----------------------|
| <b>seq95</b>  | Firmicutes    | Clostridia   | 0                   | 0                    | 130                 | 106                  |
| <b>seq99</b>  | Firmicutes    | Clostridia   | 0                   | 0                    | 0                   | 0                    |
| <b>seq101</b> | Firmicutes    | Clostridia   | 13                  | 70                   | 106                 | 0                    |
| <b>seq119</b> | Firmicutes    | Clostridia   | 0                   | 92                   | 579                 | 353                  |
| <b>seq122</b> | Firmicutes    | Clostridia   | 0                   | 7                    | 118                 | 120                  |
| <b>seq128</b> | Firmicutes    | Clostridia   | 52                  | 412                  | 285                 | 594                  |
| <b>seq129</b> | Firmicutes    | Clostridia   | 28                  | 455                  | 104                 | 177                  |
| <b>seq138</b> | Firmicutes    | Clostridia   | 0                   | 116                  | 291                 | 308                  |
| <b>seq171</b> | Firmicutes    | Clostridia   | 0                   | 49                   | 168                 | 235                  |
| <b>seq202</b> | Firmicutes    | Clostridia   | 0                   | 73                   | 64                  | 0                    |
| <b>seq203</b> | Firmicutes    | Clostridia   | 0                   | 0                    | 13                  | 0                    |
| <b>seq226</b> | Firmicutes    | Clostridia   | 15                  | 0                    | 21                  | 0                    |
| <b>seq235</b> | Firmicutes    | Clostridia   | 0                   | 187                  | 101                 | 74                   |
| <b>seq239</b> | Firmicutes    | Clostridia   | 46                  | 44                   | 0                   | 0                    |
| <b>seq243</b> | Firmicutes    | Clostridia   | 10                  | 57                   | 42                  | 51                   |
| <b>seq249</b> | Firmicutes    | Clostridia   | 0                   | 0                    | 0                   | 0                    |
| <b>seq255</b> | Firmicutes    | Clostridia   | 0                   | 0                    | 0                   | 0                    |
| <b>seq263</b> | Firmicutes    | Clostridia   | 0                   | 0                    | 0                   | 0                    |
| <b>seq272</b> | Firmicutes    | Clostridia   | 0                   | 44                   | 104                 | 92                   |
| <b>seq273</b> | Firmicutes    | Clostridia   | 0                   | 0                    | 0                   | 0                    |
| <b>seq276</b> | Firmicutes    | Clostridia   | 11                  | 144                  | 113                 | 19                   |
| <b>seq290</b> | Firmicutes    | Clostridia   | 0                   | 0                    | 0                   | 0                    |
| <b>seq292</b> | Firmicutes    | Clostridia   | 0                   | 0                    | 59                  | 0                    |
| <b>seq293</b> | Firmicutes    | Clostridia   | 0                   | 0                    | 0                   | 40                   |
| <b>seq298</b> | Firmicutes    | Clostridia   | 0                   | 0                    | 0                   | 0                    |
| <b>seq302</b> | Firmicutes    | Clostridia   | 0                   | 0                    | 0                   | 0                    |
| <b>seq318</b> | Firmicutes    | Clostridia   | 0                   | 33                   | 341                 | 242                  |
| <b>seq323</b> | Firmicutes    | Clostridia   | 0                   | 0                    | 0                   | 0                    |
| <b>seq325</b> | Firmicutes    | Clostridia   | 0                   | 83                   | 279                 | 128                  |
| <b>seq328</b> | Firmicutes    | Clostridia   | 0                   | 0                    | 0                   | 0                    |
| <b>seq329</b> | Firmicutes    | Clostridia   | 0                   | 0                    | 0                   | 0                    |
| <b>seq337</b> | Firmicutes    | Clostridia   | 0                   | 0                    | 0                   | 0                    |

Sequence Count Table

|               | <b>Phylum</b> | <b>Class</b> | <b>Subject17WK0</b> | <b>Subject17WK12</b> | <b>Subject1WK0</b> | <b>Subject1WK12</b> |
|---------------|---------------|--------------|---------------------|----------------------|--------------------|---------------------|
| <b>seq95</b>  | Firmicutes    | Clostridia   | 854                 | 1402                 | 593                | 555                 |
| <b>seq99</b>  | Firmicutes    | Clostridia   | 0                   | 0                    | 0                  | 0                   |
| <b>seq101</b> | Firmicutes    | Clostridia   | 0                   | 0                    | 0                  | 0                   |
| <b>seq119</b> | Firmicutes    | Clostridia   | 32                  | 571                  | 702                | 743                 |
| <b>seq122</b> | Firmicutes    | Clostridia   | 178                 | 319                  | 380                | 394                 |
| <b>seq128</b> | Firmicutes    | Clostridia   | 0                   | 0                    | 0                  | 0                   |
| <b>seq129</b> | Firmicutes    | Clostridia   | 317                 | 800                  | 0                  | 0                   |
| <b>seq138</b> | Firmicutes    | Clostridia   | 147                 | 267                  | 0                  | 0                   |
| <b>seq171</b> | Firmicutes    | Clostridia   | 23                  | 83                   | 524                | 435                 |
| <b>seq202</b> | Firmicutes    | Clostridia   | 0                   | 0                    | 170                | 162                 |
| <b>seq203</b> | Firmicutes    | Clostridia   | 0                   | 0                    | 0                  | 0                   |
| <b>seq226</b> | Firmicutes    | Clostridia   | 27                  | 294                  | 0                  | 0                   |
| <b>seq235</b> | Firmicutes    | Clostridia   | 30                  | 71                   | 141                | 122                 |
| <b>seq239</b> | Firmicutes    | Clostridia   | 0                   | 0                    | 61                 | 55                  |
| <b>seq243</b> | Firmicutes    | Clostridia   | 29                  | 153                  | 0                  | 0                   |
| <b>seq249</b> | Firmicutes    | Clostridia   | 0                   | 0                    | 394                | 363                 |
| <b>seq255</b> | Firmicutes    | Clostridia   | 0                   | 0                    | 0                  | 0                   |
| <b>seq263</b> | Firmicutes    | Clostridia   | 0                   | 0                    | 1286               | 1277                |
| <b>seq272</b> | Firmicutes    | Clostridia   | 12                  | 0                    | 121                | 126                 |
| <b>seq273</b> | Firmicutes    | Clostridia   | 0                   | 0                    | 0                  | 0                   |
| <b>seq276</b> | Firmicutes    | Clostridia   | 0                   | 0                    | 0                  | 0                   |
| <b>seq290</b> | Firmicutes    | Clostridia   | 9                   | 0                    | 19                 | 21                  |
| <b>seq292</b> | Firmicutes    | Clostridia   | 0                   | 0                    | 0                  | 0                   |
| <b>seq293</b> | Firmicutes    | Clostridia   | 0                   | 5                    | 0                  | 0                   |
| <b>seq298</b> | Firmicutes    | Clostridia   | 0                   | 0                    | 0                  | 0                   |
| <b>seq302</b> | Firmicutes    | Clostridia   | 0                   | 0                    | 0                  | 0                   |
| <b>seq318</b> | Firmicutes    | Clostridia   | 9                   | 0                    | 0                  | 0                   |
| <b>seq323</b> | Firmicutes    | Clostridia   | 0                   | 0                    | 382                | 360                 |
| <b>seq325</b> | Firmicutes    | Clostridia   | 0                   | 0                    | 0                  | 0                   |
| <b>seq328</b> | Firmicutes    | Clostridia   | 0                   | 0                    | 0                  | 0                   |
| <b>seq329</b> | Firmicutes    | Clostridia   | 0                   | 0                    | 0                  | 0                   |
| <b>seq337</b> | Firmicutes    | Clostridia   | 0                   | 0                    | 0                  | 0                   |



Sequence Count Table

|               | <b>Phylum</b> | <b>Class</b> | <b>Subject2WK0</b> | <b>Subject2WK12</b> | <b>Subject3WK0</b> | <b>Subject3WK12</b> |
|---------------|---------------|--------------|--------------------|---------------------|--------------------|---------------------|
| <b>seq95</b>  | Firmicutes    | Clostridia   | 0                  | 0                   | 0                  | 249                 |
| <b>seq99</b>  | Firmicutes    | Clostridia   | 0                  | 0                   | 2996               | 506                 |
| <b>seq101</b> | Firmicutes    | Clostridia   | 1979               | 192                 | 0                  | 0                   |
| <b>seq119</b> | Firmicutes    | Clostridia   | 0                  | 0                   | 722                | 205                 |
| <b>seq122</b> | Firmicutes    | Clostridia   | 1614               | 287                 | 0                  | 253                 |
| <b>seq128</b> | Firmicutes    | Clostridia   | 0                  | 0                   | 0                  | 0                   |
| <b>seq129</b> | Firmicutes    | Clostridia   | 115                | 132                 | 604                | 392                 |
| <b>seq138</b> | Firmicutes    | Clostridia   | 0                  | 0                   | 0                  | 0                   |
| <b>seq171</b> | Firmicutes    | Clostridia   | 326                | 126                 | 0                  | 0                   |
| <b>seq202</b> | Firmicutes    | Clostridia   | 123                | 697                 | 0                  | 0                   |
| <b>seq203</b> | Firmicutes    | Clostridia   | 154                | 161                 | 2387               | 552                 |
| <b>seq226</b> | Firmicutes    | Clostridia   | 0                  | 0                   | 0                  | 0                   |
| <b>seq235</b> | Firmicutes    | Clostridia   | 156                | 95                  | 0                  | 0                   |
| <b>seq239</b> | Firmicutes    | Clostridia   | 0                  | 0                   | 0                  | 0                   |
| <b>seq243</b> | Firmicutes    | Clostridia   | 67                 | 77                  | 0                  | 0                   |
| <b>seq249</b> | Firmicutes    | Clostridia   | 0                  | 0                   | 56                 | 237                 |
| <b>seq255</b> | Firmicutes    | Clostridia   | 0                  | 0                   | 0                  | 0                   |
| <b>seq263</b> | Firmicutes    | Clostridia   | 0                  | 0                   | 0                  | 0                   |
| <b>seq272</b> | Firmicutes    | Clostridia   | 104                | 159                 | 0                  | 0                   |
| <b>seq273</b> | Firmicutes    | Clostridia   | 0                  | 0                   | 2208               | 545                 |
| <b>seq276</b> | Firmicutes    | Clostridia   | 129                | 78                  | 0                  | 0                   |
| <b>seq290</b> | Firmicutes    | Clostridia   | 26                 | 17                  | 0                  | 0                   |
| <b>seq292</b> | Firmicutes    | Clostridia   | 0                  | 0                   | 0                  | 0                   |
| <b>seq293</b> | Firmicutes    | Clostridia   | 0                  | 0                   | 0                  | 0                   |
| <b>seq298</b> | Firmicutes    | Clostridia   | 0                  | 0                   | 0                  | 0                   |
| <b>seq302</b> | Firmicutes    | Clostridia   | 0                  | 0                   | 0                  | 0                   |
| <b>seq318</b> | Firmicutes    | Clostridia   | 0                  | 0                   | 0                  | 0                   |
| <b>seq323</b> | Firmicutes    | Clostridia   | 0                  | 0                   | 0                  | 0                   |
| <b>seq325</b> | Firmicutes    | Clostridia   | 0                  | 0                   | 0                  | 0                   |
| <b>seq328</b> | Firmicutes    | Clostridia   | 83                 | 475                 | 0                  | 0                   |
| <b>seq329</b> | Firmicutes    | Clostridia   | 0                  | 0                   | 0                  | 0                   |
| <b>seq337</b> | Firmicutes    | Clostridia   | 0                  | 0                   | 0                  | 0                   |

Sequence Count Table

|               | <b>Phylum</b> | <b>Class</b> | <b>Subject4WK0</b> | <b>Subject4WK12</b> | <b>Subject5WK0</b> | <b>Subject5WK12</b> |
|---------------|---------------|--------------|--------------------|---------------------|--------------------|---------------------|
| <b>seq95</b>  | Firmicutes    | Clostridia   | 706                | 352                 | 327                | 80                  |
| <b>seq99</b>  | Firmicutes    | Clostridia   | 0                  | 0                   | 0                  | 0                   |
| <b>seq101</b> | Firmicutes    | Clostridia   | 0                  | 0                   | 0                  | 0                   |
| <b>seq119</b> | Firmicutes    | Clostridia   | 226                | 113                 | 290                | 407                 |
| <b>seq122</b> | Firmicutes    | Clostridia   | 183                | 72                  | 215                | 0                   |
| <b>seq128</b> | Firmicutes    | Clostridia   | 0                  | 0                   | 0                  | 0                   |
| <b>seq129</b> | Firmicutes    | Clostridia   | 0                  | 0                   | 0                  | 0                   |
| <b>seq138</b> | Firmicutes    | Clostridia   | 1114               | 570                 | 709                | 541                 |
| <b>seq171</b> | Firmicutes    | Clostridia   | 31                 | 89                  | 95                 | 12                  |
| <b>seq202</b> | Firmicutes    | Clostridia   | 0                  | 78                  | 171                | 212                 |
| <b>seq203</b> | Firmicutes    | Clostridia   | 24                 | 15                  | 0                  | 0                   |
| <b>seq226</b> | Firmicutes    | Clostridia   | 716                | 364                 | 0                  | 0                   |
| <b>seq235</b> | Firmicutes    | Clostridia   | 63                 | 92                  | 0                  | 0                   |
| <b>seq239</b> | Firmicutes    | Clostridia   | 47                 | 15                  | 15                 | 79                  |
| <b>seq243</b> | Firmicutes    | Clostridia   | 41                 | 35                  | 0                  | 0                   |
| <b>seq249</b> | Firmicutes    | Clostridia   | 0                  | 0                   | 0                  | 0                   |
| <b>seq255</b> | Firmicutes    | Clostridia   | 215                | 205                 | 0                  | 0                   |
| <b>seq263</b> | Firmicutes    | Clostridia   | 0                  | 0                   | 0                  | 0                   |
| <b>seq272</b> | Firmicutes    | Clostridia   | 53                 | 135                 | 0                  | 0                   |
| <b>seq273</b> | Firmicutes    | Clostridia   | 0                  | 0                   | 0                  | 0                   |
| <b>seq276</b> | Firmicutes    | Clostridia   | 0                  | 0                   | 0                  | 0                   |
| <b>seq290</b> | Firmicutes    | Clostridia   | 9                  | 21                  | 14                 | 83                  |
| <b>seq292</b> | Firmicutes    | Clostridia   | 0                  | 0                   | 0                  | 0                   |
| <b>seq293</b> | Firmicutes    | Clostridia   | 0                  | 0                   | 0                  | 0                   |
| <b>seq298</b> | Firmicutes    | Clostridia   | 0                  | 0                   | 0                  | 0                   |
| <b>seq302</b> | Firmicutes    | Clostridia   | 0                  | 0                   | 0                  | 0                   |
| <b>seq318</b> | Firmicutes    | Clostridia   | 0                  | 30                  | 0                  | 0                   |
| <b>seq323</b> | Firmicutes    | Clostridia   | 0                  | 0                   | 0                  | 0                   |
| <b>seq325</b> | Firmicutes    | Clostridia   | 832                | 338                 | 0                  | 0                   |
| <b>seq328</b> | Firmicutes    | Clostridia   | 0                  | 0                   | 0                  | 0                   |
| <b>seq329</b> | Firmicutes    | Clostridia   | 0                  | 0                   | 0                  | 0                   |
| <b>seq337</b> | Firmicutes    | Clostridia   | 0                  | 0                   | 0                  | 0                   |

Sequence Count Table

|               | <b>Phylum</b> | <b>Class</b> | <b>Subject6WK0</b> | <b>Subject6WK12</b> | <b>Subject18WK0</b> | <b>Subject18WK12</b> |
|---------------|---------------|--------------|--------------------|---------------------|---------------------|----------------------|
| <b>seq95</b>  | Firmicutes    | Clostridia   | 300                | 250                 | 0                   | 74                   |
| <b>seq99</b>  | Firmicutes    | Clostridia   | 0                  | 0                   | 0                   | 0                    |
| <b>seq101</b> | Firmicutes    | Clostridia   | 0                  | 0                   | 1565                | 0                    |
| <b>seq119</b> | Firmicutes    | Clostridia   | 230                | 260                 | 1880                | 230                  |
| <b>seq122</b> | Firmicutes    | Clostridia   | 177                | 148                 | 124                 | 0                    |
| <b>seq128</b> | Firmicutes    | Clostridia   | 356                | 3863                | 0                   | 0                    |
| <b>seq129</b> | Firmicutes    | Clostridia   | 160                | 239                 | 324                 | 229                  |
| <b>seq138</b> | Firmicutes    | Clostridia   | 0                  | 0                   | 0                   | 0                    |
| <b>seq171</b> | Firmicutes    | Clostridia   | 162                | 277                 | 0                   | 0                    |
| <b>seq202</b> | Firmicutes    | Clostridia   | 0                  | 113                 | 0                   | 0                    |
| <b>seq203</b> | Firmicutes    | Clostridia   | 29                 | 97                  | 0                   | 0                    |
| <b>seq226</b> | Firmicutes    | Clostridia   | 59                 | 0                   | 0                   | 0                    |
| <b>seq235</b> | Firmicutes    | Clostridia   | 99                 | 117                 | 0                   | 0                    |
| <b>seq239</b> | Firmicutes    | Clostridia   | 108                | 29                  | 61                  | 0                    |
| <b>seq243</b> | Firmicutes    | Clostridia   | 48                 | 109                 | 124                 | 90                   |
| <b>seq249</b> | Firmicutes    | Clostridia   | 26                 | 49                  | 0                   | 0                    |
| <b>seq255</b> | Firmicutes    | Clostridia   | 67                 | 42                  | 0                   | 0                    |
| <b>seq263</b> | Firmicutes    | Clostridia   | 0                  | 0                   | 0                   | 0                    |
| <b>seq272</b> | Firmicutes    | Clostridia   | 86                 | 85                  | 0                   | 0                    |
| <b>seq273</b> | Firmicutes    | Clostridia   | 0                  | 0                   | 0                   | 0                    |
| <b>seq276</b> | Firmicutes    | Clostridia   | 140                | 166                 | 0                   | 0                    |
| <b>seq290</b> | Firmicutes    | Clostridia   | 0                  | 0                   | 0                   | 0                    |
| <b>seq292</b> | Firmicutes    | Clostridia   | 0                  | 0                   | 0                   | 0                    |
| <b>seq293</b> | Firmicutes    | Clostridia   | 134                | 36                  | 0                   | 0                    |
| <b>seq298</b> | Firmicutes    | Clostridia   | 0                  | 0                   | 36                  | 0                    |
| <b>seq302</b> | Firmicutes    | Clostridia   | 0                  | 0                   | 0                   | 0                    |
| <b>seq318</b> | Firmicutes    | Clostridia   | 57                 | 243                 | 0                   | 0                    |
| <b>seq323</b> | Firmicutes    | Clostridia   | 71                 | 102                 | 0                   | 0                    |
| <b>seq325</b> | Firmicutes    | Clostridia   | 0                  | 0                   | 0                   | 0                    |
| <b>seq328</b> | Firmicutes    | Clostridia   | 0                  | 0                   | 94                  | 0                    |
| <b>seq329</b> | Firmicutes    | Clostridia   | 0                  | 0                   | 0                   | 0                    |
| <b>seq337</b> | Firmicutes    | Clostridia   | 0                  | 0                   | 0                   | 0                    |

Sequence Count Table

|               | <b>Phylum</b> | <b>Class</b> | <b>Subject19WK0</b> | <b>Subject19WK12</b> | <b>Subject20WK0</b> | <b>Subject20WK12</b> |
|---------------|---------------|--------------|---------------------|----------------------|---------------------|----------------------|
| <b>seq95</b>  | Firmicutes    | Clostridia   | 0                   | 0                    | 162                 | 132                  |
| <b>seq99</b>  | Firmicutes    | Clostridia   | 266                 | 443                  | 0                   | 0                    |
| <b>seq101</b> | Firmicutes    | Clostridia   | 0                   | 0                    | 95                  | 387                  |
| <b>seq119</b> | Firmicutes    | Clostridia   | 0                   | 0                    | 0                   | 40                   |
| <b>seq122</b> | Firmicutes    | Clostridia   | 213                 | 170                  | 172                 | 213                  |
| <b>seq128</b> | Firmicutes    | Clostridia   | 0                   | 0                    | 85                  | 255                  |
| <b>seq129</b> | Firmicutes    | Clostridia   | 0                   | 78                   | 113                 | 0                    |
| <b>seq138</b> | Firmicutes    | Clostridia   | 0                   | 0                    | 0                   | 71                   |
| <b>seq171</b> | Firmicutes    | Clostridia   | 407                 | 263                  | 61                  | 60                   |
| <b>seq202</b> | Firmicutes    | Clostridia   | 0                   | 0                    | 0                   | 0                    |
| <b>seq203</b> | Firmicutes    | Clostridia   | 0                   | 0                    | 0                   | 63                   |
| <b>seq226</b> | Firmicutes    | Clostridia   | 0                   | 0                    | 143                 | 149                  |
| <b>seq235</b> | Firmicutes    | Clostridia   | 0                   | 0                    | 59                  | 70                   |
| <b>seq239</b> | Firmicutes    | Clostridia   | 0                   | 0                    | 203                 | 550                  |
| <b>seq243</b> | Firmicutes    | Clostridia   | 16                  | 269                  | 77                  | 78                   |
| <b>seq249</b> | Firmicutes    | Clostridia   | 0                   | 0                    | 0                   | 214                  |
| <b>seq255</b> | Firmicutes    | Clostridia   | 0                   | 0                    | 0                   | 0                    |
| <b>seq263</b> | Firmicutes    | Clostridia   | 0                   | 0                    | 0                   | 0                    |
| <b>seq272</b> | Firmicutes    | Clostridia   | 0                   | 0                    | 57                  | 75                   |
| <b>seq273</b> | Firmicutes    | Clostridia   | 0                   | 0                    | 0                   | 0                    |
| <b>seq276</b> | Firmicutes    | Clostridia   | 178                 | 422                  | 0                   | 0                    |
| <b>seq290</b> | Firmicutes    | Clostridia   | 0                   | 0                    | 0                   | 0                    |
| <b>seq292</b> | Firmicutes    | Clostridia   | 0                   | 0                    | 136                 | 38                   |
| <b>seq293</b> | Firmicutes    | Clostridia   | 0                   | 0                    | 766                 | 91                   |
| <b>seq298</b> | Firmicutes    | Clostridia   | 0                   | 0                    | 0                   | 0                    |
| <b>seq302</b> | Firmicutes    | Clostridia   | 0                   | 0                    | 0                   | 0                    |
| <b>seq318</b> | Firmicutes    | Clostridia   | 0                   | 0                    | 54                  | 61                   |
| <b>seq323</b> | Firmicutes    | Clostridia   | 0                   | 0                    | 178                 | 99                   |
| <b>seq325</b> | Firmicutes    | Clostridia   | 0                   | 0                    | 0                   | 173                  |
| <b>seq328</b> | Firmicutes    | Clostridia   | 0                   | 0                    | 0                   | 0                    |
| <b>seq329</b> | Firmicutes    | Clostridia   | 0                   | 0                    | 0                   | 0                    |
| <b>seq337</b> | Firmicutes    | Clostridia   | 644                 | 1100                 | 0                   | 0                    |

Sequence Count Table

|               | <b>Phylum</b> | <b>Class</b> | <b>Subject7WK0</b> | <b>Subject7WK12</b> | <b>Subject21WK0</b> | <b>Subject21WK12</b> |
|---------------|---------------|--------------|--------------------|---------------------|---------------------|----------------------|
| <b>seq95</b>  | Firmicutes    | Clostridia   | 743                | 549                 | 0                   | 0                    |
| <b>seq99</b>  | Firmicutes    | Clostridia   | 0                  | 0                   | 1483                | 2902                 |
| <b>seq101</b> | Firmicutes    | Clostridia   | 0                  | 0                   | 0                   | 0                    |
| <b>seq119</b> | Firmicutes    | Clostridia   | 308                | 0                   | 0                   | 0                    |
| <b>seq122</b> | Firmicutes    | Clostridia   | 78                 | 94                  | 0                   | 0                    |
| <b>seq128</b> | Firmicutes    | Clostridia   | 0                  | 0                   | 0                   | 0                    |
| <b>seq129</b> | Firmicutes    | Clostridia   | 340                | 154                 | 0                   | 0                    |
| <b>seq138</b> | Firmicutes    | Clostridia   | 0                  | 0                   | 0                   | 0                    |
| <b>seq171</b> | Firmicutes    | Clostridia   | 0                  | 0                   | 0                   | 0                    |
| <b>seq202</b> | Firmicutes    | Clostridia   | 0                  | 0                   | 0                   | 0                    |
| <b>seq203</b> | Firmicutes    | Clostridia   | 0                  | 0                   | 0                   | 0                    |
| <b>seq226</b> | Firmicutes    | Clostridia   | 0                  | 48                  | 0                   | 0                    |
| <b>seq235</b> | Firmicutes    | Clostridia   | 84                 | 199                 | 0                   | 0                    |
| <b>seq239</b> | Firmicutes    | Clostridia   | 27                 | 9                   | 0                   | 0                    |
| <b>seq243</b> | Firmicutes    | Clostridia   | 176                | 110                 | 0                   | 0                    |
| <b>seq249</b> | Firmicutes    | Clostridia   | 0                  | 0                   | 0                   | 0                    |
| <b>seq255</b> | Firmicutes    | Clostridia   | 454                | 404                 | 0                   | 0                    |
| <b>seq263</b> | Firmicutes    | Clostridia   | 0                  | 0                   | 0                   | 0                    |
| <b>seq272</b> | Firmicutes    | Clostridia   | 94                 | 158                 | 0                   | 0                    |
| <b>seq273</b> | Firmicutes    | Clostridia   | 0                  | 0                   | 0                   | 0                    |
| <b>seq276</b> | Firmicutes    | Clostridia   | 0                  | 0                   | 173                 | 165                  |
| <b>seq290</b> | Firmicutes    | Clostridia   | 148                | 22                  | 0                   | 0                    |
| <b>seq292</b> | Firmicutes    | Clostridia   | 0                  | 0                   | 0                   | 0                    |
| <b>seq293</b> | Firmicutes    | Clostridia   | 0                  | 0                   | 0                   | 0                    |
| <b>seq298</b> | Firmicutes    | Clostridia   | 44                 | 82                  | 0                   | 0                    |
| <b>seq302</b> | Firmicutes    | Clostridia   | 0                  | 0                   | 0                   | 0                    |
| <b>seq318</b> | Firmicutes    | Clostridia   | 0                  | 0                   | 0                   | 0                    |
| <b>seq323</b> | Firmicutes    | Clostridia   | 0                  | 0                   | 0                   | 0                    |
| <b>seq325</b> | Firmicutes    | Clostridia   | 0                  | 0                   | 0                   | 0                    |
| <b>seq328</b> | Firmicutes    | Clostridia   | 139                | 463                 | 0                   | 0                    |
| <b>seq329</b> | Firmicutes    | Clostridia   | 0                  | 0                   | 741                 | 1140                 |
| <b>seq337</b> | Firmicutes    | Clostridia   | 0                  | 0                   | 0                   | 0                    |

Sequence Count Table

|               | <b>Phylum</b> | <b>Class</b> | <b>Subject8WK0</b> | <b>Subject8WK12</b> | <b>Subject9WK0</b> | <b>Subject9WK12</b> |
|---------------|---------------|--------------|--------------------|---------------------|--------------------|---------------------|
| <b>seq95</b>  | Firmicutes    | Clostridia   | 115                | 1010                | 0                  | 0                   |
| <b>seq99</b>  | Firmicutes    | Clostridia   | 0                  | 0                   | 124                | 3812                |
| <b>seq101</b> | Firmicutes    | Clostridia   | 0                  | 0                   | 0                  | 0                   |
| <b>seq119</b> | Firmicutes    | Clostridia   | 427                | 364                 | 489                | 88                  |
| <b>seq122</b> | Firmicutes    | Clostridia   | 112                | 1001                | 0                  | 0                   |
| <b>seq128</b> | Firmicutes    | Clostridia   | 0                  | 0                   | 0                  | 0                   |
| <b>seq129</b> | Firmicutes    | Clostridia   | 0                  | 0                   | 483                | 596                 |
| <b>seq138</b> | Firmicutes    | Clostridia   | 0                  | 0                   | 1491               | 2264                |
| <b>seq171</b> | Firmicutes    | Clostridia   | 443                | 148                 | 0                  | 0                   |
| <b>seq202</b> | Firmicutes    | Clostridia   | 128                | 156                 | 180                | 315                 |
| <b>seq203</b> | Firmicutes    | Clostridia   | 40                 | 43                  | 0                  | 0                   |
| <b>seq226</b> | Firmicutes    | Clostridia   | 0                  | 0                   | 0                  | 0                   |
| <b>seq235</b> | Firmicutes    | Clostridia   | 163                | 219                 | 0                  | 0                   |
| <b>seq239</b> | Firmicutes    | Clostridia   | 342                | 37                  | 6                  | 0                   |
| <b>seq243</b> | Firmicutes    | Clostridia   | 48                 | 206                 | 96                 | 120                 |
| <b>seq249</b> | Firmicutes    | Clostridia   | 0                  | 0                   | 0                  | 0                   |
| <b>seq255</b> | Firmicutes    | Clostridia   | 0                  | 0                   | 0                  | 0                   |
| <b>seq263</b> | Firmicutes    | Clostridia   | 0                  | 0                   | 0                  | 0                   |
| <b>seq272</b> | Firmicutes    | Clostridia   | 121                | 138                 | 0                  | 0                   |
| <b>seq273</b> | Firmicutes    | Clostridia   | 0                  | 0                   | 0                  | 0                   |
| <b>seq276</b> | Firmicutes    | Clostridia   | 0                  | 0                   | 0                  | 0                   |
| <b>seq290</b> | Firmicutes    | Clostridia   | 0                  | 0                   | 160                | 51                  |
| <b>seq292</b> | Firmicutes    | Clostridia   | 0                  | 0                   | 0                  | 0                   |
| <b>seq293</b> | Firmicutes    | Clostridia   | 18                 | 36                  | 0                  | 0                   |
| <b>seq298</b> | Firmicutes    | Clostridia   | 0                  | 0                   | 0                  | 0                   |
| <b>seq302</b> | Firmicutes    | Clostridia   | 0                  | 0                   | 0                  | 0                   |
| <b>seq318</b> | Firmicutes    | Clostridia   | 0                  | 187                 | 0                  | 0                   |
| <b>seq323</b> | Firmicutes    | Clostridia   | 0                  | 0                   | 0                  | 0                   |
| <b>seq325</b> | Firmicutes    | Clostridia   | 0                  | 0                   | 0                  | 0                   |
| <b>seq328</b> | Firmicutes    | Clostridia   | 0                  | 0                   | 120                | 247                 |
| <b>seq329</b> | Firmicutes    | Clostridia   | 0                  | 0                   | 0                  | 0                   |
| <b>seq337</b> | Firmicutes    | Clostridia   | 0                  | 0                   | 0                  | 0                   |

Sequence Count Table

|               | <b>Phylum</b> | <b>Class</b> | <b>Subject10WK0</b> | <b>Subject10WK12</b> | <b>Subject22WK0</b> | <b>Subject22WK12</b> |
|---------------|---------------|--------------|---------------------|----------------------|---------------------|----------------------|
| <b>seq95</b>  | Firmicutes    | Clostridia   | 236                 | 239                  | 20                  | 0                    |
| <b>seq99</b>  | Firmicutes    | Clostridia   | 307                 | 240                  | 0                   | 0                    |
| <b>seq101</b> | Firmicutes    | Clostridia   | 1100                | 524                  | 119                 | 0                    |
| <b>seq119</b> | Firmicutes    | Clostridia   | 103                 | 126                  | 0                   | 14                   |
| <b>seq122</b> | Firmicutes    | Clostridia   | 153                 | 115                  | 0                   | 47                   |
| <b>seq128</b> | Firmicutes    | Clostridia   | 0                   | 0                    | 1382                | 523                  |
| <b>seq129</b> | Firmicutes    | Clostridia   | 0                   | 0                    | 0                   | 0                    |
| <b>seq138</b> | Firmicutes    | Clostridia   | 0                   | 0                    | 261                 | 194                  |
| <b>seq171</b> | Firmicutes    | Clostridia   | 0                   | 0                    | 119                 | 54                   |
| <b>seq202</b> | Firmicutes    | Clostridia   | 685                 | 191                  | 0                   | 0                    |
| <b>seq203</b> | Firmicutes    | Clostridia   | 0                   | 0                    | 0                   | 0                    |
| <b>seq226</b> | Firmicutes    | Clostridia   | 0                   | 0                    | 54                  | 68                   |
| <b>seq235</b> | Firmicutes    | Clostridia   | 0                   | 0                    | 118                 | 136                  |
| <b>seq239</b> | Firmicutes    | Clostridia   | 78                  | 46                   | 23                  | 78                   |
| <b>seq243</b> | Firmicutes    | Clostridia   | 0                   | 0                    | 46                  | 30                   |
| <b>seq249</b> | Firmicutes    | Clostridia   | 0                   | 0                    | 67                  | 146                  |
| <b>seq255</b> | Firmicutes    | Clostridia   | 0                   | 0                    | 0                   | 0                    |
| <b>seq263</b> | Firmicutes    | Clostridia   | 0                   | 0                    | 0                   | 0                    |
| <b>seq272</b> | Firmicutes    | Clostridia   | 0                   | 0                    | 0                   | 0                    |
| <b>seq273</b> | Firmicutes    | Clostridia   | 0                   | 0                    | 0                   | 0                    |
| <b>seq276</b> | Firmicutes    | Clostridia   | 0                   | 0                    | 0                   | 0                    |
| <b>seq290</b> | Firmicutes    | Clostridia   | 58                  | 0                    | 0                   | 0                    |
| <b>seq292</b> | Firmicutes    | Clostridia   | 0                   | 0                    | 776                 | 55                   |
| <b>seq293</b> | Firmicutes    | Clostridia   | 0                   | 0                    | 542                 | 448                  |
| <b>seq298</b> | Firmicutes    | Clostridia   | 0                   | 0                    | 0                   | 0                    |
| <b>seq302</b> | Firmicutes    | Clostridia   | 0                   | 0                    | 0                   | 0                    |
| <b>seq318</b> | Firmicutes    | Clostridia   | 0                   | 0                    | 0                   | 0                    |
| <b>seq323</b> | Firmicutes    | Clostridia   | 0                   | 0                    | 22                  | 66                   |
| <b>seq325</b> | Firmicutes    | Clostridia   | 0                   | 0                    | 112                 | 0                    |
| <b>seq328</b> | Firmicutes    | Clostridia   | 0                   | 0                    | 0                   | 0                    |
| <b>seq329</b> | Firmicutes    | Clostridia   | 0                   | 0                    | 0                   | 0                    |
| <b>seq337</b> | Firmicutes    | Clostridia   | 0                   | 0                    | 0                   | 0                    |

Sequence Count Table

|               | <b>Phylum</b> | <b>Class</b> | <b>Subject23WK0</b> | <b>Subject23WK12</b> | <b>Subject24WK0</b> | <b>Subject24WK12</b> |
|---------------|---------------|--------------|---------------------|----------------------|---------------------|----------------------|
| <b>seq95</b>  | Firmicutes    | Clostridia   | 127                 | 373                  | 782                 | 1366                 |
| <b>seq99</b>  | Firmicutes    | Clostridia   | 0                   | 0                    | 0                   | 0                    |
| <b>seq101</b> | Firmicutes    | Clostridia   | 1619                | 1698                 | 1277                | 458                  |
| <b>seq119</b> | Firmicutes    | Clostridia   | 185                 | 316                  | 447                 | 344                  |
| <b>seq122</b> | Firmicutes    | Clostridia   | 66                  | 307                  | 860                 | 1517                 |
| <b>seq128</b> | Firmicutes    | Clostridia   | 428                 | 981                  | 611                 | 0                    |
| <b>seq129</b> | Firmicutes    | Clostridia   | 164                 | 182                  | 0                   | 175                  |
| <b>seq138</b> | Firmicutes    | Clostridia   | 103                 | 123                  | 0                   | 0                    |
| <b>seq171</b> | Firmicutes    | Clostridia   | 625                 | 280                  | 216                 | 108                  |
| <b>seq202</b> | Firmicutes    | Clostridia   | 124                 | 184                  | 281                 | 217                  |
| <b>seq203</b> | Firmicutes    | Clostridia   | 0                   | 19                   | 0                   | 61                   |
| <b>seq226</b> | Firmicutes    | Clostridia   | 556                 | 394                  | 405                 | 155                  |
| <b>seq235</b> | Firmicutes    | Clostridia   | 108                 | 67                   | 159                 | 128                  |
| <b>seq239</b> | Firmicutes    | Clostridia   | 392                 | 258                  | 64                  | 107                  |
| <b>seq243</b> | Firmicutes    | Clostridia   | 70                  | 46                   | 58                  | 148                  |
| <b>seq249</b> | Firmicutes    | Clostridia   | 46                  | 118                  | 855                 | 354                  |
| <b>seq255</b> | Firmicutes    | Clostridia   | 59                  | 140                  | 0                   | 0                    |
| <b>seq263</b> | Firmicutes    | Clostridia   | 0                   | 0                    | 0                   | 63                   |
| <b>seq272</b> | Firmicutes    | Clostridia   | 66                  | 77                   | 152                 | 63                   |
| <b>seq273</b> | Firmicutes    | Clostridia   | 0                   | 0                    | 0                   | 0                    |
| <b>seq276</b> | Firmicutes    | Clostridia   | 56                  | 207                  | 119                 | 0                    |
| <b>seq290</b> | Firmicutes    | Clostridia   | 0                   | 0                    | 0                   | 0                    |
| <b>seq292</b> | Firmicutes    | Clostridia   | 69                  | 316                  | 28                  | 0                    |
| <b>seq293</b> | Firmicutes    | Clostridia   | 47                  | 97                   | 0                   | 0                    |
| <b>seq298</b> | Firmicutes    | Clostridia   | 155                 | 87                   | 397                 | 195                  |
| <b>seq302</b> | Firmicutes    | Clostridia   | 0                   | 0                    | 0                   | 0                    |
| <b>seq318</b> | Firmicutes    | Clostridia   | 0                   | 0                    | 88                  | 112                  |
| <b>seq323</b> | Firmicutes    | Clostridia   | 0                   | 0                    | 0                   | 0                    |
| <b>seq325</b> | Firmicutes    | Clostridia   | 0                   | 0                    | 0                   | 0                    |
| <b>seq328</b> | Firmicutes    | Clostridia   | 0                   | 0                    | 0                   | 0                    |
| <b>seq329</b> | Firmicutes    | Clostridia   | 0                   | 0                    | 0                   | 0                    |
| <b>seq337</b> | Firmicutes    | Clostridia   | 0                   | 0                    | 0                   | 0                    |



Sequence Count Table

|               | <b>Phylum</b> | <b>Class</b> | <b>Subject11WK0</b> | <b>Subject11WK12</b> | <b>Subject12WK0</b> | <b>Subject12WK12</b> |
|---------------|---------------|--------------|---------------------|----------------------|---------------------|----------------------|
| <b>seq95</b>  | Firmicutes    | Clostridia   | 765                 | 170                  | 156                 | 127                  |
| <b>seq99</b>  | Firmicutes    | Clostridia   | 0                   | 0                    | 0                   | 0                    |
| <b>seq101</b> | Firmicutes    | Clostridia   | 256                 | 480                  | 527                 | 0                    |
| <b>seq119</b> | Firmicutes    | Clostridia   | 0                   | 0                    | 165                 | 0                    |
| <b>seq122</b> | Firmicutes    | Clostridia   | 149                 | 45                   | 70                  | 69                   |
| <b>seq128</b> | Firmicutes    | Clostridia   | 0                   | 0                    | 0                   | 0                    |
| <b>seq129</b> | Firmicutes    | Clostridia   | 0                   | 0                    | 0                   | 0                    |
| <b>seq138</b> | Firmicutes    | Clostridia   | 0                   | 0                    | 0                   | 0                    |
| <b>seq171</b> | Firmicutes    | Clostridia   | 0                   | 0                    | 87                  | 268                  |
| <b>seq202</b> | Firmicutes    | Clostridia   | 0                   | 0                    | 0                   | 0                    |
| <b>seq203</b> | Firmicutes    | Clostridia   | 0                   | 0                    | 0                   | 0                    |
| <b>seq226</b> | Firmicutes    | Clostridia   | 0                   | 0                    | 235                 | 11                   |
| <b>seq235</b> | Firmicutes    | Clostridia   | 0                   | 0                    | 111                 | 77                   |
| <b>seq239</b> | Firmicutes    | Clostridia   | 201                 | 40                   | 0                   | 0                    |
| <b>seq243</b> | Firmicutes    | Clostridia   | 0                   | 0                    | 67                  | 98                   |
| <b>seq249</b> | Firmicutes    | Clostridia   | 90                  | 99                   | 0                   | 0                    |
| <b>seq255</b> | Firmicutes    | Clostridia   | 0                   | 0                    | 86                  | 204                  |
| <b>seq263</b> | Firmicutes    | Clostridia   | 0                   | 0                    | 0                   | 0                    |
| <b>seq272</b> | Firmicutes    | Clostridia   | 0                   | 0                    | 34                  | 58                   |
| <b>seq273</b> | Firmicutes    | Clostridia   | 0                   | 0                    | 0                   | 0                    |
| <b>seq276</b> | Firmicutes    | Clostridia   | 0                   | 0                    | 23                  | 114                  |
| <b>seq290</b> | Firmicutes    | Clostridia   | 0                   | 0                    | 0                   | 16                   |
| <b>seq292</b> | Firmicutes    | Clostridia   | 167                 | 31                   | 0                   | 0                    |
| <b>seq293</b> | Firmicutes    | Clostridia   | 0                   | 0                    | 0                   | 0                    |
| <b>seq298</b> | Firmicutes    | Clostridia   | 0                   | 0                    | 0                   | 0                    |
| <b>seq302</b> | Firmicutes    | Clostridia   | 1011                | 1170                 | 0                   | 0                    |
| <b>seq318</b> | Firmicutes    | Clostridia   | 0                   | 0                    | 59                  | 44                   |
| <b>seq323</b> | Firmicutes    | Clostridia   | 0                   | 0                    | 0                   | 0                    |
| <b>seq325</b> | Firmicutes    | Clostridia   | 0                   | 0                    | 0                   | 0                    |
| <b>seq328</b> | Firmicutes    | Clostridia   | 0                   | 0                    | 0                   | 221                  |
| <b>seq329</b> | Firmicutes    | Clostridia   | 0                   | 0                    | 0                   | 0                    |
| <b>seq337</b> | Firmicutes    | Clostridia   | 0                   | 0                    | 0                   | 0                    |

Sequence Count Table

|               | <b>Phylum</b> | <b>Class</b> | <b>Subject25WK0</b> | <b>Subject25WK12</b> | <b>Subject38WK0</b> | <b>Subject38WK12</b> |
|---------------|---------------|--------------|---------------------|----------------------|---------------------|----------------------|
| <b>seq95</b>  | Firmicutes    | Clostridia   | 115                 | 94                   | 0                   | 0                    |
| <b>seq99</b>  | Firmicutes    | Clostridia   | 0                   | 0                    | 0                   | 0                    |
| <b>seq101</b> | Firmicutes    | Clostridia   | 0                   | 0                    | 0                   | 0                    |
| <b>seq119</b> | Firmicutes    | Clostridia   | 86                  | 19                   | 0                   | 0                    |
| <b>seq122</b> | Firmicutes    | Clostridia   | 135                 | 145                  | 0                   | 0                    |
| <b>seq128</b> | Firmicutes    | Clostridia   | 0                   | 0                    | 0                   | 0                    |
| <b>seq129</b> | Firmicutes    | Clostridia   | 976                 | 1416                 | 0                   | 0                    |
| <b>seq138</b> | Firmicutes    | Clostridia   | 311                 | 531                  | 0                   | 0                    |
| <b>seq171</b> | Firmicutes    | Clostridia   | 0                   | 0                    | 0                   | 0                    |
| <b>seq202</b> | Firmicutes    | Clostridia   | 0                   | 0                    | 0                   | 0                    |
| <b>seq203</b> | Firmicutes    | Clostridia   | 0                   | 0                    | 0                   | 0                    |
| <b>seq226</b> | Firmicutes    | Clostridia   | 39                  | 5                    | 0                   | 0                    |
| <b>seq235</b> | Firmicutes    | Clostridia   | 0                   | 0                    | 0                   | 0                    |
| <b>seq239</b> | Firmicutes    | Clostridia   | 45                  | 0                    | 0                   | 0                    |
| <b>seq243</b> | Firmicutes    | Clostridia   | 111                 | 21                   | 0                   | 0                    |
| <b>seq249</b> | Firmicutes    | Clostridia   | 0                   | 0                    | 0                   | 0                    |
| <b>seq255</b> | Firmicutes    | Clostridia   | 71                  | 0                    | 0                   | 0                    |
| <b>seq263</b> | Firmicutes    | Clostridia   | 0                   | 0                    | 0                   | 0                    |
| <b>seq272</b> | Firmicutes    | Clostridia   | 27                  | 0                    | 0                   | 0                    |
| <b>seq273</b> | Firmicutes    | Clostridia   | 0                   | 0                    | 0                   | 0                    |
| <b>seq276</b> | Firmicutes    | Clostridia   | 36                  | 34                   | 0                   | 0                    |
| <b>seq290</b> | Firmicutes    | Clostridia   | 38                  | 54                   | 0                   | 0                    |
| <b>seq292</b> | Firmicutes    | Clostridia   | 657                 | 61                   | 0                   | 0                    |
| <b>seq293</b> | Firmicutes    | Clostridia   | 0                   | 0                    | 0                   | 0                    |
| <b>seq298</b> | Firmicutes    | Clostridia   | 0                   | 0                    | 0                   | 0                    |
| <b>seq302</b> | Firmicutes    | Clostridia   | 0                   | 0                    | 0                   | 0                    |
| <b>seq318</b> | Firmicutes    | Clostridia   | 27                  | 0                    | 0                   | 0                    |
| <b>seq323</b> | Firmicutes    | Clostridia   | 0                   | 0                    | 0                   | 0                    |
| <b>seq325</b> | Firmicutes    | Clostridia   | 0                   | 0                    | 0                   | 0                    |
| <b>seq328</b> | Firmicutes    | Clostridia   | 0                   | 0                    | 0                   | 0                    |
| <b>seq329</b> | Firmicutes    | Clostridia   | 0                   | 0                    | 0                   | 0                    |
| <b>seq337</b> | Firmicutes    | Clostridia   | 0                   | 0                    | 0                   | 0                    |

Sequence Count Table

|               | <b>Phylum</b> | <b>Class</b> | <b>Subject31WK0</b> | <b>Subject31WK12</b> | <b>Subject32WK0</b> | <b>Subject32WK12</b> |
|---------------|---------------|--------------|---------------------|----------------------|---------------------|----------------------|
| <b>seq95</b>  | Firmicutes    | Clostridia   | 0                   | 0                    | 69                  | 0                    |
| <b>seq99</b>  | Firmicutes    | Clostridia   | 0                   | 0                    | 101                 | 0                    |
| <b>seq101</b> | Firmicutes    | Clostridia   | 0                   | 0                    | 0                   | 0                    |
| <b>seq119</b> | Firmicutes    | Clostridia   | 0                   | 0                    | 67                  | 0                    |
| <b>seq122</b> | Firmicutes    | Clostridia   | 0                   | 0                    | 67                  | 0                    |
| <b>seq128</b> | Firmicutes    | Clostridia   | 0                   | 0                    | 0                   | 0                    |
| <b>seq129</b> | Firmicutes    | Clostridia   | 0                   | 0                    | 132                 | 0                    |
| <b>seq138</b> | Firmicutes    | Clostridia   | 0                   | 0                    | 0                   | 0                    |
| <b>seq171</b> | Firmicutes    | Clostridia   | 0                   | 0                    | 142                 | 0                    |
| <b>seq202</b> | Firmicutes    | Clostridia   | 0                   | 0                    | 0                   | 0                    |
| <b>seq203</b> | Firmicutes    | Clostridia   | 0                   | 0                    | 0                   | 0                    |
| <b>seq226</b> | Firmicutes    | Clostridia   | 0                   | 0                    | 0                   | 0                    |
| <b>seq235</b> | Firmicutes    | Clostridia   | 0                   | 0                    | 0                   | 0                    |
| <b>seq239</b> | Firmicutes    | Clostridia   | 0                   | 0                    | 0                   | 0                    |
| <b>seq243</b> | Firmicutes    | Clostridia   | 0                   | 0                    | 0                   | 0                    |
| <b>seq249</b> | Firmicutes    | Clostridia   | 0                   | 0                    | 0                   | 0                    |
| <b>seq255</b> | Firmicutes    | Clostridia   | 0                   | 0                    | 0                   | 0                    |
| <b>seq263</b> | Firmicutes    | Clostridia   | 0                   | 0                    | 0                   | 0                    |
| <b>seq272</b> | Firmicutes    | Clostridia   | 0                   | 0                    | 0                   | 0                    |
| <b>seq273</b> | Firmicutes    | Clostridia   | 0                   | 0                    | 0                   | 0                    |
| <b>seq276</b> | Firmicutes    | Clostridia   | 0                   | 0                    | 0                   | 0                    |
| <b>seq290</b> | Firmicutes    | Clostridia   | 0                   | 0                    | 0                   | 0                    |
| <b>seq292</b> | Firmicutes    | Clostridia   | 0                   | 0                    | 0                   | 0                    |
| <b>seq293</b> | Firmicutes    | Clostridia   | 0                   | 0                    | 0                   | 0                    |
| <b>seq298</b> | Firmicutes    | Clostridia   | 0                   | 0                    | 0                   | 0                    |
| <b>seq302</b> | Firmicutes    | Clostridia   | 0                   | 0                    | 0                   | 0                    |
| <b>seq318</b> | Firmicutes    | Clostridia   | 0                   | 0                    | 0                   | 0                    |
| <b>seq323</b> | Firmicutes    | Clostridia   | 0                   | 0                    | 0                   | 0                    |
| <b>seq325</b> | Firmicutes    | Clostridia   | 0                   | 0                    | 0                   | 0                    |
| <b>seq328</b> | Firmicutes    | Clostridia   | 0                   | 0                    | 0                   | 0                    |
| <b>seq329</b> | Firmicutes    | Clostridia   | 0                   | 0                    | 0                   | 0                    |
| <b>seq337</b> | Firmicutes    | Clostridia   | 0                   | 0                    | 0                   | 0                    |

Sequence Count Table

|               | <b>Phylum</b> | <b>Class</b> | <b>Subject13WK0</b> | <b>Subject13WK12</b> | <b>Subject39WK0</b> | <b>Subject39WK12</b> |
|---------------|---------------|--------------|---------------------|----------------------|---------------------|----------------------|
| <b>seq95</b>  | Firmicutes    | Clostridia   | 441                 | 0                    | 0                   | 17                   |
| <b>seq99</b>  | Firmicutes    | Clostridia   | 0                   | 0                    | 0                   | 0                    |
| <b>seq101</b> | Firmicutes    | Clostridia   | 105                 | 370                  | 0                   | 0                    |
| <b>seq119</b> | Firmicutes    | Clostridia   | 71                  | 60                   | 0                   | 0                    |
| <b>seq122</b> | Firmicutes    | Clostridia   | 373                 | 34                   | 0                   | 0                    |
| <b>seq128</b> | Firmicutes    | Clostridia   | 0                   | 0                    | 0                   | 0                    |
| <b>seq129</b> | Firmicutes    | Clostridia   | 192                 | 141                  | 0                   | 174                  |
| <b>seq138</b> | Firmicutes    | Clostridia   | 0                   | 0                    | 0                   | 0                    |
| <b>seq171</b> | Firmicutes    | Clostridia   | 132                 | 84                   | 0                   | 42                   |
| <b>seq202</b> | Firmicutes    | Clostridia   | 226                 | 188                  | 0                   | 0                    |
| <b>seq203</b> | Firmicutes    | Clostridia   | 309                 | 188                  | 0                   | 0                    |
| <b>seq226</b> | Firmicutes    | Clostridia   | 0                   | 147                  | 0                   | 30                   |
| <b>seq235</b> | Firmicutes    | Clostridia   | 97                  | 36                   | 0                   | 31                   |
| <b>seq239</b> | Firmicutes    | Clostridia   | 29                  | 68                   | 0                   | 0                    |
| <b>seq243</b> | Firmicutes    | Clostridia   | 38                  | 39                   | 0                   | 46                   |
| <b>seq249</b> | Firmicutes    | Clostridia   | 0                   | 0                    | 0                   | 0                    |
| <b>seq255</b> | Firmicutes    | Clostridia   | 318                 | 97                   | 0                   | 0                    |
| <b>seq263</b> | Firmicutes    | Clostridia   | 366                 | 0                    | 0                   | 0                    |
| <b>seq272</b> | Firmicutes    | Clostridia   | 40                  | 68                   | 0                   | 51                   |
| <b>seq273</b> | Firmicutes    | Clostridia   | 0                   | 0                    | 0                   | 0                    |
| <b>seq276</b> | Firmicutes    | Clostridia   | 0                   | 0                    | 0                   | 0                    |
| <b>seq290</b> | Firmicutes    | Clostridia   | 37                  | 0                    | 0                   | 91                   |
| <b>seq292</b> | Firmicutes    | Clostridia   | 0                   | 0                    | 0                   | 0                    |
| <b>seq293</b> | Firmicutes    | Clostridia   | 0                   | 0                    | 0                   | 0                    |
| <b>seq298</b> | Firmicutes    | Clostridia   | 248                 | 665                  | 0                   | 0                    |
| <b>seq302</b> | Firmicutes    | Clostridia   | 0                   | 0                    | 0                   | 0                    |
| <b>seq318</b> | Firmicutes    | Clostridia   | 41                  | 49                   | 0                   | 11                   |
| <b>seq323</b> | Firmicutes    | Clostridia   | 152                 | 0                    | 0                   | 0                    |
| <b>seq325</b> | Firmicutes    | Clostridia   | 0                   | 0                    | 0                   | 0                    |
| <b>seq328</b> | Firmicutes    | Clostridia   | 0                   | 0                    | 0                   | 77                   |
| <b>seq329</b> | Firmicutes    | Clostridia   | 0                   | 0                    | 0                   | 0                    |
| <b>seq337</b> | Firmicutes    | Clostridia   | 0                   | 0                    | 0                   | 0                    |

Sequence Count Table

|               | <b>Phylum</b> | <b>Class</b> | <b>Subject26WK0</b> | <b>Subject26WK12</b> | <b>Subject14WK0</b> | <b>Subject14WK12</b> |
|---------------|---------------|--------------|---------------------|----------------------|---------------------|----------------------|
| <b>seq95</b>  | Firmicutes    | Clostridia   | 0                   | 0                    | 243                 | 121                  |
| <b>seq99</b>  | Firmicutes    | Clostridia   | 195                 | 370                  | 0                   | 0                    |
| <b>seq101</b> | Firmicutes    | Clostridia   | 0                   | 0                    | 126                 | 247                  |
| <b>seq119</b> | Firmicutes    | Clostridia   | 0                   | 0                    | 22                  | 0                    |
| <b>seq122</b> | Firmicutes    | Clostridia   | 0                   | 0                    | 138                 | 0                    |
| <b>seq128</b> | Firmicutes    | Clostridia   | 0                   | 0                    | 0                   | 0                    |
| <b>seq129</b> | Firmicutes    | Clostridia   | 734                 | 497                  | 0                   | 0                    |
| <b>seq138</b> | Firmicutes    | Clostridia   | 0                   | 0                    | 0                   | 0                    |
| <b>seq171</b> | Firmicutes    | Clostridia   | 0                   | 0                    | 87                  | 90                   |
| <b>seq202</b> | Firmicutes    | Clostridia   | 0                   | 0                    | 27                  | 50                   |
| <b>seq203</b> | Firmicutes    | Clostridia   | 0                   | 0                    | 249                 | 141                  |
| <b>seq226</b> | Firmicutes    | Clostridia   | 0                   | 0                    | 115                 | 0                    |
| <b>seq235</b> | Firmicutes    | Clostridia   | 0                   | 0                    | 88                  | 72                   |
| <b>seq239</b> | Firmicutes    | Clostridia   | 0                   | 0                    | 19                  | 57                   |
| <b>seq243</b> | Firmicutes    | Clostridia   | 0                   | 0                    | 31                  | 85                   |
| <b>seq249</b> | Firmicutes    | Clostridia   | 0                   | 0                    | 0                   | 0                    |
| <b>seq255</b> | Firmicutes    | Clostridia   | 0                   | 0                    | 535                 | 59                   |
| <b>seq263</b> | Firmicutes    | Clostridia   | 0                   | 0                    | 0                   | 0                    |
| <b>seq272</b> | Firmicutes    | Clostridia   | 0                   | 0                    | 74                  | 34                   |
| <b>seq273</b> | Firmicutes    | Clostridia   | 0                   | 0                    | 0                   | 0                    |
| <b>seq276</b> | Firmicutes    | Clostridia   | 0                   | 0                    | 61                  | 59                   |
| <b>seq290</b> | Firmicutes    | Clostridia   | 649                 | 334                  | 0                   | 0                    |
| <b>seq292</b> | Firmicutes    | Clostridia   | 0                   | 0                    | 0                   | 0                    |
| <b>seq293</b> | Firmicutes    | Clostridia   | 0                   | 0                    | 0                   | 82                   |
| <b>seq298</b> | Firmicutes    | Clostridia   | 0                   | 0                    | 213                 | 83                   |
| <b>seq302</b> | Firmicutes    | Clostridia   | 0                   | 0                    | 0                   | 0                    |
| <b>seq318</b> | Firmicutes    | Clostridia   | 0                   | 0                    | 180                 | 107                  |
| <b>seq323</b> | Firmicutes    | Clostridia   | 0                   | 0                    | 184                 | 258                  |
| <b>seq325</b> | Firmicutes    | Clostridia   | 0                   | 0                    | 0                   | 0                    |
| <b>seq328</b> | Firmicutes    | Clostridia   | 0                   | 0                    | 0                   | 0                    |
| <b>seq329</b> | Firmicutes    | Clostridia   | 0                   | 0                    | 0                   | 0                    |
| <b>seq337</b> | Firmicutes    | Clostridia   | 0                   | 0                    | 0                   | 0                    |

Sequence Count Table

|               | <b>Phylum</b> | <b>Class</b> | <b>Subject27WK0</b> | <b>Subject27WK12</b> | <b>Subject15WK0</b> | <b>Subject15WK12</b> |
|---------------|---------------|--------------|---------------------|----------------------|---------------------|----------------------|
| <b>seq95</b>  | Firmicutes    | Clostridia   | 324                 | 0                    | 0                   | 0                    |
| <b>seq99</b>  | Firmicutes    | Clostridia   | 0                   | 22                   | 0                   | 0                    |
| <b>seq101</b> | Firmicutes    | Clostridia   | 0                   | 0                    | 0                   | 0                    |
| <b>seq119</b> | Firmicutes    | Clostridia   | 0                   | 0                    | 0                   | 0                    |
| <b>seq122</b> | Firmicutes    | Clostridia   | 102                 | 152                  | 0                   | 0                    |
| <b>seq128</b> | Firmicutes    | Clostridia   | 0                   | 145                  | 478                 | 231                  |
| <b>seq129</b> | Firmicutes    | Clostridia   | 0                   | 58                   | 0                   | 0                    |
| <b>seq138</b> | Firmicutes    | Clostridia   | 0                   | 0                    | 0                   | 0                    |
| <b>seq171</b> | Firmicutes    | Clostridia   | 111                 | 138                  | 125                 | 124                  |
| <b>seq202</b> | Firmicutes    | Clostridia   | 0                   | 0                    | 125                 | 124                  |
| <b>seq203</b> | Firmicutes    | Clostridia   | 16                  | 56                   | 131                 | 313                  |
| <b>seq226</b> | Firmicutes    | Clostridia   | 0                   | 0                    | 0                   | 0                    |
| <b>seq235</b> | Firmicutes    | Clostridia   | 61                  | 66                   | 79                  | 153                  |
| <b>seq239</b> | Firmicutes    | Clostridia   | 70                  | 352                  | 12                  | 0                    |
| <b>seq243</b> | Firmicutes    | Clostridia   | 57                  | 34                   | 186                 | 200                  |
| <b>seq249</b> | Firmicutes    | Clostridia   | 30                  | 159                  | 0                   | 0                    |
| <b>seq255</b> | Firmicutes    | Clostridia   | 100                 | 103                  | 0                   | 0                    |
| <b>seq263</b> | Firmicutes    | Clostridia   | 0                   | 0                    | 0                   | 0                    |
| <b>seq272</b> | Firmicutes    | Clostridia   | 0                   | 71                   | 60                  | 116                  |
| <b>seq273</b> | Firmicutes    | Clostridia   | 0                   | 0                    | 0                   | 0                    |
| <b>seq276</b> | Firmicutes    | Clostridia   | 0                   | 0                    | 83                  | 128                  |
| <b>seq290</b> | Firmicutes    | Clostridia   | 271                 | 295                  | 0                   | 0                    |
| <b>seq292</b> | Firmicutes    | Clostridia   | 0                   | 0                    | 0                   | 0                    |
| <b>seq293</b> | Firmicutes    | Clostridia   | 0                   | 0                    | 0                   | 0                    |
| <b>seq298</b> | Firmicutes    | Clostridia   | 0                   | 0                    | 0                   | 0                    |
| <b>seq302</b> | Firmicutes    | Clostridia   | 0                   | 0                    | 0                   | 0                    |
| <b>seq318</b> | Firmicutes    | Clostridia   | 0                   | 0                    | 0                   | 0                    |
| <b>seq323</b> | Firmicutes    | Clostridia   | 0                   | 0                    | 66                  | 11                   |
| <b>seq325</b> | Firmicutes    | Clostridia   | 0                   | 0                    | 0                   | 0                    |
| <b>seq328</b> | Firmicutes    | Clostridia   | 0                   | 0                    | 0                   | 0                    |
| <b>seq329</b> | Firmicutes    | Clostridia   | 0                   | 0                    | 0                   | 0                    |
| <b>seq337</b> | Firmicutes    | Clostridia   | 0                   | 0                    | 0                   | 0                    |

Sequence Count Table

|               | <b>Phylum</b> | <b>Class</b> | <b>Δ</b> |  |  |  |
|---------------|---------------|--------------|----------|--|--|--|
| <b>seq95</b>  | Firmicutes    | Clostridia   |          |  |  |  |
| <b>seq99</b>  | Firmicutes    | Clostridia   |          |  |  |  |
| <b>seq101</b> | Firmicutes    | Clostridia   |          |  |  |  |
| <b>seq119</b> | Firmicutes    | Clostridia   |          |  |  |  |
| <b>seq122</b> | Firmicutes    | Clostridia   |          |  |  |  |
| <b>seq128</b> | Firmicutes    | Clostridia   |          |  |  |  |
| <b>seq129</b> | Firmicutes    | Clostridia   |          |  |  |  |
| <b>seq138</b> | Firmicutes    | Clostridia   |          |  |  |  |
| <b>seq171</b> | Firmicutes    | Clostridia   |          |  |  |  |
| <b>seq202</b> | Firmicutes    | Clostridia   |          |  |  |  |
| <b>seq203</b> | Firmicutes    | Clostridia   |          |  |  |  |
| <b>seq226</b> | Firmicutes    | Clostridia   |          |  |  |  |
| <b>seq235</b> | Firmicutes    | Clostridia   |          |  |  |  |
| <b>seq239</b> | Firmicutes    | Clostridia   |          |  |  |  |
| <b>seq243</b> | Firmicutes    | Clostridia   |          |  |  |  |
| <b>seq249</b> | Firmicutes    | Clostridia   |          |  |  |  |
| <b>seq255</b> | Firmicutes    | Clostridia   |          |  |  |  |
| <b>seq263</b> | Firmicutes    | Clostridia   |          |  |  |  |
| <b>seq272</b> | Firmicutes    | Clostridia   |          |  |  |  |
| <b>seq273</b> | Firmicutes    | Clostridia   |          |  |  |  |
| <b>seq276</b> | Firmicutes    | Clostridia   |          |  |  |  |
| <b>seq290</b> | Firmicutes    | Clostridia   |          |  |  |  |
| <b>seq292</b> | Firmicutes    | Clostridia   |          |  |  |  |
| <b>seq293</b> | Firmicutes    | Clostridia   |          |  |  |  |
| <b>seq298</b> | Firmicutes    | Clostridia   |          |  |  |  |
| <b>seq302</b> | Firmicutes    | Clostridia   |          |  |  |  |
| <b>seq318</b> | Firmicutes    | Clostridia   |          |  |  |  |
| <b>seq323</b> | Firmicutes    | Clostridia   |          |  |  |  |
| <b>seq325</b> | Firmicutes    | Clostridia   |          |  |  |  |
| <b>seq328</b> | Firmicutes    | Clostridia   |          |  |  |  |
| <b>seq329</b> | Firmicutes    | Clostridia   |          |  |  |  |
| <b>seq337</b> | Firmicutes    | Clostridia   |          |  |  |  |

Sequence Count Table

|               | <b>Phylum</b> | <b>Class</b> | <b>Order</b>  | <b>Family</b>   |
|---------------|---------------|--------------|---------------|-----------------|
| <b>seq345</b> | Firmicutes    | Clostridia   | Clostridiales | Lachnospiraceae |
| <b>seq350</b> | Firmicutes    | Clostridia   | Clostridiales | Lachnospiraceae |
| <b>seq351</b> | Firmicutes    | Clostridia   | Clostridiales | Lachnospiraceae |
| <b>seq357</b> | Firmicutes    | Clostridia   | Clostridiales | Lachnospiraceae |
| <b>seq358</b> | Firmicutes    | Clostridia   | Clostridiales | Lachnospiraceae |
| <b>seq361</b> | Firmicutes    | Clostridia   | Clostridiales | Lachnospiraceae |
| <b>seq363</b> | Firmicutes    | Clostridia   | Clostridiales | Lachnospiraceae |
| <b>seq365</b> | Firmicutes    | Clostridia   | Clostridiales | Lachnospiraceae |
| <b>seq379</b> | Firmicutes    | Clostridia   | Clostridiales | Lachnospiraceae |
| <b>seq384</b> | Firmicutes    | Clostridia   | Clostridiales | Lachnospiraceae |
| <b>seq390</b> | Firmicutes    | Clostridia   | Clostridiales | Lachnospiraceae |
| <b>seq395</b> | Firmicutes    | Clostridia   | Clostridiales | Lachnospiraceae |
| <b>seq416</b> | Firmicutes    | Clostridia   | Clostridiales | Lachnospiraceae |
| <b>seq424</b> | Firmicutes    | Clostridia   | Clostridiales | Lachnospiraceae |
| <b>seq443</b> | Firmicutes    | Clostridia   | Clostridiales | Lachnospiraceae |
| <b>seq449</b> | Firmicutes    | Clostridia   | Clostridiales | Lachnospiraceae |
| <b>seq459</b> | Firmicutes    | Clostridia   | Clostridiales | Lachnospiraceae |
| <b>seq461</b> | Firmicutes    | Clostridia   | Clostridiales | Lachnospiraceae |
| <b>seq465</b> | Firmicutes    | Clostridia   | Clostridiales | Lachnospiraceae |
| <b>seq476</b> | Firmicutes    | Clostridia   | Clostridiales | Lachnospiraceae |
| <b>seq480</b> | Firmicutes    | Clostridia   | Clostridiales | Lachnospiraceae |
| <b>seq493</b> | Firmicutes    | Clostridia   | Clostridiales | Lachnospiraceae |
| <b>seq502</b> | Firmicutes    | Clostridia   | Clostridiales | Lachnospiraceae |
| <b>seq503</b> | Firmicutes    | Clostridia   | Clostridiales | Lachnospiraceae |
| <b>seq512</b> | Firmicutes    | Clostridia   | Clostridiales | Lachnospiraceae |
| <b>seq526</b> | Firmicutes    | Clostridia   | Clostridiales | Lachnospiraceae |
| <b>seq532</b> | Firmicutes    | Clostridia   | Clostridiales | Lachnospiraceae |
| <b>seq536</b> | Firmicutes    | Clostridia   | Clostridiales | Lachnospiraceae |
| <b>seq537</b> | Firmicutes    | Clostridia   | Clostridiales | Lachnospiraceae |
| <b>seq542</b> | Firmicutes    | Clostridia   | Clostridiales | Lachnospiraceae |
| <b>seq556</b> | Firmicutes    | Clostridia   | Clostridiales | Lachnospiraceae |
| <b>seq558</b> | Firmicutes    | Clostridia   | Clostridiales | Lachnospiraceae |



Sequence Count Table

|               | <b>Phylum</b> | <b>Class</b> | <b>Genus</b> | <b>Species</b> |
|---------------|---------------|--------------|--------------|----------------|
| <b>seq345</b> | Firmicutes    | Clostridia   |              |                |
| <b>seq350</b> | Firmicutes    | Clostridia   |              |                |
| <b>seq351</b> | Firmicutes    | Clostridia   |              |                |
| <b>seq357</b> | Firmicutes    | Clostridia   |              |                |
| <b>seq358</b> | Firmicutes    | Clostridia   |              |                |
| <b>seq361</b> | Firmicutes    | Clostridia   |              |                |
| <b>seq363</b> | Firmicutes    | Clostridia   |              |                |
| <b>seq365</b> | Firmicutes    | Clostridia   |              |                |
| <b>seq379</b> | Firmicutes    | Clostridia   |              |                |
| <b>seq384</b> | Firmicutes    | Clostridia   |              |                |
| <b>seq390</b> | Firmicutes    | Clostridia   |              |                |
| <b>seq395</b> | Firmicutes    | Clostridia   |              |                |
| <b>seq416</b> | Firmicutes    | Clostridia   |              |                |
| <b>seq424</b> | Firmicutes    | Clostridia   |              |                |
| <b>seq443</b> | Firmicutes    | Clostridia   |              |                |
| <b>seq449</b> | Firmicutes    | Clostridia   |              |                |
| <b>seq459</b> | Firmicutes    | Clostridia   |              |                |
| <b>seq461</b> | Firmicutes    | Clostridia   |              |                |
| <b>seq465</b> | Firmicutes    | Clostridia   |              |                |
| <b>seq476</b> | Firmicutes    | Clostridia   |              |                |
| <b>seq480</b> | Firmicutes    | Clostridia   |              |                |
| <b>seq493</b> | Firmicutes    | Clostridia   |              |                |
| <b>seq502</b> | Firmicutes    | Clostridia   |              |                |
| <b>seq503</b> | Firmicutes    | Clostridia   |              |                |
| <b>seq512</b> | Firmicutes    | Clostridia   |              |                |
| <b>seq526</b> | Firmicutes    | Clostridia   |              |                |
| <b>seq532</b> | Firmicutes    | Clostridia   |              |                |
| <b>seq536</b> | Firmicutes    | Clostridia   |              |                |
| <b>seq537</b> | Firmicutes    | Clostridia   |              |                |
| <b>seq542</b> | Firmicutes    | Clostridia   |              |                |
| <b>seq556</b> | Firmicutes    | Clostridia   |              |                |
| <b>seq558</b> | Firmicutes    | Clostridia   |              |                |

Sequence Count Table

|               | <b>Phylum</b> | <b>Class</b> | <b>Subject34WK0</b> | <b>Subject34WK12</b> | <b>Subject16WK0</b> | <b>Subject16WK12</b> |
|---------------|---------------|--------------|---------------------|----------------------|---------------------|----------------------|
| <b>seq345</b> | Firmicutes    | Clostridia   | 0                   | 0                    | 0                   | 0                    |
| <b>seq350</b> | Firmicutes    | Clostridia   | 0                   | 0                    | 25                  | 17                   |
| <b>seq351</b> | Firmicutes    | Clostridia   | 0                   | 173                  | 0                   | 0                    |
| <b>seq357</b> | Firmicutes    | Clostridia   | 0                   | 46                   | 0                   | 0                    |
| <b>seq358</b> | Firmicutes    | Clostridia   | 0                   | 0                    | 0                   | 0                    |
| <b>seq361</b> | Firmicutes    | Clostridia   | 0                   | 77                   | 84                  | 74                   |
| <b>seq363</b> | Firmicutes    | Clostridia   | 0                   | 0                    | 0                   | 0                    |
| <b>seq365</b> | Firmicutes    | Clostridia   | 0                   | 15                   | 0                   | 0                    |
| <b>seq379</b> | Firmicutes    | Clostridia   | 0                   | 16                   | 75                  | 55                   |
| <b>seq384</b> | Firmicutes    | Clostridia   | 0                   | 0                    | 16                  | 14                   |
| <b>seq390</b> | Firmicutes    | Clostridia   | 0                   | 29                   | 0                   | 0                    |
| <b>seq395</b> | Firmicutes    | Clostridia   | 0                   | 0                    | 0                   | 0                    |
| <b>seq416</b> | Firmicutes    | Clostridia   | 0                   | 0                    | 0                   | 0                    |
| <b>seq424</b> | Firmicutes    | Clostridia   | 0                   | 0                    | 0                   | 0                    |
| <b>seq443</b> | Firmicutes    | Clostridia   | 0                   | 0                    | 0                   | 0                    |
| <b>seq449</b> | Firmicutes    | Clostridia   | 0                   | 0                    | 425                 | 211                  |
| <b>seq459</b> | Firmicutes    | Clostridia   | 0                   | 0                    | 0                   | 25                   |
| <b>seq461</b> | Firmicutes    | Clostridia   | 0                   | 0                    | 0                   | 0                    |
| <b>seq465</b> | Firmicutes    | Clostridia   | 0                   | 0                    | 0                   | 0                    |
| <b>seq476</b> | Firmicutes    | Clostridia   | 0                   | 0                    | 0                   | 0                    |
| <b>seq480</b> | Firmicutes    | Clostridia   | 0                   | 48                   | 0                   | 0                    |
| <b>seq493</b> | Firmicutes    | Clostridia   | 0                   | 30                   | 0                   | 0                    |
| <b>seq502</b> | Firmicutes    | Clostridia   | 0                   | 0                    | 249                 | 61                   |
| <b>seq503</b> | Firmicutes    | Clostridia   | 0                   | 0                    | 0                   | 0                    |
| <b>seq512</b> | Firmicutes    | Clostridia   | 0                   | 0                    | 58                  | 75                   |
| <b>seq526</b> | Firmicutes    | Clostridia   | 0                   | 0                    | 0                   | 0                    |
| <b>seq532</b> | Firmicutes    | Clostridia   | 0                   | 14                   | 7                   | 23                   |
| <b>seq536</b> | Firmicutes    | Clostridia   | 0                   | 0                    | 0                   | 0                    |
| <b>seq537</b> | Firmicutes    | Clostridia   | 0                   | 0                    | 0                   | 0                    |
| <b>seq542</b> | Firmicutes    | Clostridia   | 0                   | 0                    | 0                   | 0                    |
| <b>seq556</b> | Firmicutes    | Clostridia   | 0                   | 0                    | 0                   | 0                    |
| <b>seq558</b> | Firmicutes    | Clostridia   | 0                   | 0                    | 11                  | 12                   |

Sequence Count Table

|               | <b>Phylum</b> | <b>Class</b> | <b>Subject17WK0</b> | <b>Subject17WK12</b> | <b>Subject1WK0</b> | <b>Subject1WK12</b> |
|---------------|---------------|--------------|---------------------|----------------------|--------------------|---------------------|
| <b>seq345</b> | Firmicutes    | Clostridia   | 0                   | 0                    | 0                  | 0                   |
| <b>seq350</b> | Firmicutes    | Clostridia   | 38                  | 56                   | 0                  | 0                   |
| <b>seq351</b> | Firmicutes    | Clostridia   | 0                   | 101                  | 192                | 246                 |
| <b>seq357</b> | Firmicutes    | Clostridia   | 0                   | 0                    | 37                 | 41                  |
| <b>seq358</b> | Firmicutes    | Clostridia   | 0                   | 0                    | 0                  | 0                   |
| <b>seq361</b> | Firmicutes    | Clostridia   | 0                   | 0                    | 128                | 124                 |
| <b>seq363</b> | Firmicutes    | Clostridia   | 0                   | 0                    | 48                 | 65                  |
| <b>seq365</b> | Firmicutes    | Clostridia   | 0                   | 0                    | 0                  | 0                   |
| <b>seq379</b> | Firmicutes    | Clostridia   | 31                  | 109                  | 0                  | 0                   |
| <b>seq384</b> | Firmicutes    | Clostridia   | 32                  | 30                   | 79                 | 102                 |
| <b>seq390</b> | Firmicutes    | Clostridia   | 0                   | 108                  | 0                  | 0                   |
| <b>seq395</b> | Firmicutes    | Clostridia   | 0                   | 0                    | 0                  | 0                   |
| <b>seq416</b> | Firmicutes    | Clostridia   | 0                   | 0                    | 0                  | 0                   |
| <b>seq424</b> | Firmicutes    | Clostridia   | 0                   | 0                    | 0                  | 0                   |
| <b>seq443</b> | Firmicutes    | Clostridia   | 0                   | 0                    | 0                  | 0                   |
| <b>seq449</b> | Firmicutes    | Clostridia   | 0                   | 0                    | 0                  | 0                   |
| <b>seq459</b> | Firmicutes    | Clostridia   | 11                  | 13                   | 216                | 223                 |
| <b>seq461</b> | Firmicutes    | Clostridia   | 0                   | 0                    | 0                  | 0                   |
| <b>seq465</b> | Firmicutes    | Clostridia   | 0                   | 0                    | 0                  | 0                   |
| <b>seq476</b> | Firmicutes    | Clostridia   | 0                   | 0                    | 0                  | 0                   |
| <b>seq480</b> | Firmicutes    | Clostridia   | 0                   | 0                    | 0                  | 20                  |
| <b>seq493</b> | Firmicutes    | Clostridia   | 0                   | 0                    | 40                 | 30                  |
| <b>seq502</b> | Firmicutes    | Clostridia   | 0                   | 0                    | 0                  | 0                   |
| <b>seq503</b> | Firmicutes    | Clostridia   | 0                   | 0                    | 0                  | 0                   |
| <b>seq512</b> | Firmicutes    | Clostridia   | 0                   | 35                   | 0                  | 0                   |
| <b>seq526</b> | Firmicutes    | Clostridia   | 0                   | 0                    | 0                  | 0                   |
| <b>seq532</b> | Firmicutes    | Clostridia   | 0                   | 32                   | 0                  | 0                   |
| <b>seq536</b> | Firmicutes    | Clostridia   | 221                 | 448                  | 0                  | 0                   |
| <b>seq537</b> | Firmicutes    | Clostridia   | 0                   | 101                  | 0                  | 0                   |
| <b>seq542</b> | Firmicutes    | Clostridia   | 0                   | 0                    | 0                  | 0                   |
| <b>seq556</b> | Firmicutes    | Clostridia   | 0                   | 83                   | 0                  | 0                   |
| <b>seq558</b> | Firmicutes    | Clostridia   | 36                  | 21                   | 12                 | 12                  |

Sequence Count Table

|               | <b>Phylum</b> | <b>Class</b> | <b>Subject2WK0</b> | <b>Subject2WK12</b> | <b>Subject3WK0</b> | <b>Subject3WK12</b> |
|---------------|---------------|--------------|--------------------|---------------------|--------------------|---------------------|
| <b>seq345</b> | Firmicutes    | Clostridia   | 0                  | 0                   | 0                  | 0                   |
| <b>seq350</b> | Firmicutes    | Clostridia   | 0                  | 0                   | 0                  | 0                   |
| <b>seq351</b> | Firmicutes    | Clostridia   | 0                  | 0                   | 0                  | 0                   |
| <b>seq357</b> | Firmicutes    | Clostridia   | 9                  | 24                  | 34                 | 54                  |
| <b>seq358</b> | Firmicutes    | Clostridia   | 0                  | 0                   | 0                  | 0                   |
| <b>seq361</b> | Firmicutes    | Clostridia   | 0                  | 0                   | 0                  | 0                   |
| <b>seq363</b> | Firmicutes    | Clostridia   | 0                  | 0                   | 235                | 0                   |
| <b>seq365</b> | Firmicutes    | Clostridia   | 0                  | 0                   | 0                  | 0                   |
| <b>seq379</b> | Firmicutes    | Clostridia   | 65                 | 59                  | 0                  | 0                   |
| <b>seq384</b> | Firmicutes    | Clostridia   | 41                 | 78                  | 0                  | 0                   |
| <b>seq390</b> | Firmicutes    | Clostridia   | 401                | 65                  | 0                  | 156                 |
| <b>seq395</b> | Firmicutes    | Clostridia   | 0                  | 0                   | 0                  | 0                   |
| <b>seq416</b> | Firmicutes    | Clostridia   | 0                  | 0                   | 0                  | 0                   |
| <b>seq424</b> | Firmicutes    | Clostridia   | 0                  | 0                   | 459                | 42                  |
| <b>seq443</b> | Firmicutes    | Clostridia   | 0                  | 0                   | 0                  | 0                   |
| <b>seq449</b> | Firmicutes    | Clostridia   | 0                  | 0                   | 0                  | 0                   |
| <b>seq459</b> | Firmicutes    | Clostridia   | 0                  | 0                   | 0                  | 0                   |
| <b>seq461</b> | Firmicutes    | Clostridia   | 0                  | 0                   | 0                  | 0                   |
| <b>seq465</b> | Firmicutes    | Clostridia   | 0                  | 0                   | 661                | 255                 |
| <b>seq476</b> | Firmicutes    | Clostridia   | 0                  | 0                   | 0                  | 0                   |
| <b>seq480</b> | Firmicutes    | Clostridia   | 15                 | 22                  | 0                  | 0                   |
| <b>seq493</b> | Firmicutes    | Clostridia   | 0                  | 0                   | 29                 | 131                 |
| <b>seq502</b> | Firmicutes    | Clostridia   | 0                  | 0                   | 0                  | 0                   |
| <b>seq503</b> | Firmicutes    | Clostridia   | 0                  | 0                   | 0                  | 0                   |
| <b>seq512</b> | Firmicutes    | Clostridia   | 0                  | 0                   | 0                  | 36                  |
| <b>seq526</b> | Firmicutes    | Clostridia   | 0                  | 0                   | 0                  | 0                   |
| <b>seq532</b> | Firmicutes    | Clostridia   | 0                  | 0                   | 0                  | 0                   |
| <b>seq536</b> | Firmicutes    | Clostridia   | 0                  | 0                   | 0                  | 0                   |
| <b>seq537</b> | Firmicutes    | Clostridia   | 0                  | 0                   | 0                  | 0                   |
| <b>seq542</b> | Firmicutes    | Clostridia   | 0                  | 0                   | 0                  | 0                   |
| <b>seq556</b> | Firmicutes    | Clostridia   | 0                  | 0                   | 0                  | 0                   |
| <b>seq558</b> | Firmicutes    | Clostridia   | 0                  | 0                   | 0                  | 0                   |

Sequence Count Table

|               | <b>Phylum</b> | <b>Class</b> | <b>Subject4WK0</b> | <b>Subject4WK12</b> | <b>Subject5WK0</b> | <b>Subject5WK12</b> |
|---------------|---------------|--------------|--------------------|---------------------|--------------------|---------------------|
| <b>seq345</b> | Firmicutes    | Clostridia   | 0                  | 0                   | 0                  | 0                   |
| <b>seq350</b> | Firmicutes    | Clostridia   | 283                | 39                  | 0                  | 0                   |
| <b>seq351</b> | Firmicutes    | Clostridia   | 0                  | 403                 | 0                  | 0                   |
| <b>seq357</b> | Firmicutes    | Clostridia   | 0                  | 17                  | 15                 | 11                  |
| <b>seq358</b> | Firmicutes    | Clostridia   | 123                | 73                  | 56                 | 292                 |
| <b>seq361</b> | Firmicutes    | Clostridia   | 16                 | 63                  | 0                  | 0                   |
| <b>seq363</b> | Firmicutes    | Clostridia   | 0                  | 0                   | 0                  | 0                   |
| <b>seq365</b> | Firmicutes    | Clostridia   | 0                  | 0                   | 0                  | 0                   |
| <b>seq379</b> | Firmicutes    | Clostridia   | 43                 | 0                   | 0                  | 0                   |
| <b>seq384</b> | Firmicutes    | Clostridia   | 0                  | 0                   | 0                  | 0                   |
| <b>seq390</b> | Firmicutes    | Clostridia   | 0                  | 0                   | 0                  | 0                   |
| <b>seq395</b> | Firmicutes    | Clostridia   | 0                  | 0                   | 0                  | 0                   |
| <b>seq416</b> | Firmicutes    | Clostridia   | 0                  | 0                   | 0                  | 0                   |
| <b>seq424</b> | Firmicutes    | Clostridia   | 0                  | 0                   | 0                  | 0                   |
| <b>seq443</b> | Firmicutes    | Clostridia   | 0                  | 0                   | 0                  | 0                   |
| <b>seq449</b> | Firmicutes    | Clostridia   | 0                  | 0                   | 0                  | 0                   |
| <b>seq459</b> | Firmicutes    | Clostridia   | 0                  | 0                   | 0                  | 0                   |
| <b>seq461</b> | Firmicutes    | Clostridia   | 0                  | 0                   | 0                  | 0                   |
| <b>seq465</b> | Firmicutes    | Clostridia   | 0                  | 0                   | 0                  | 0                   |
| <b>seq476</b> | Firmicutes    | Clostridia   | 0                  | 0                   | 0                  | 0                   |
| <b>seq480</b> | Firmicutes    | Clostridia   | 4                  | 0                   | 0                  | 0                   |
| <b>seq493</b> | Firmicutes    | Clostridia   | 0                  | 0                   | 16                 | 19                  |
| <b>seq502</b> | Firmicutes    | Clostridia   | 0                  | 99                  | 0                  | 0                   |
| <b>seq503</b> | Firmicutes    | Clostridia   | 0                  | 0                   | 0                  | 0                   |
| <b>seq512</b> | Firmicutes    | Clostridia   | 250                | 63                  | 0                  | 0                   |
| <b>seq526</b> | Firmicutes    | Clostridia   | 0                  | 0                   | 0                  | 0                   |
| <b>seq532</b> | Firmicutes    | Clostridia   | 38                 | 90                  | 0                  | 0                   |
| <b>seq536</b> | Firmicutes    | Clostridia   | 0                  | 0                   | 0                  | 0                   |
| <b>seq537</b> | Firmicutes    | Clostridia   | 0                  | 0                   | 0                  | 0                   |
| <b>seq542</b> | Firmicutes    | Clostridia   | 0                  | 0                   | 0                  | 0                   |
| <b>seq556</b> | Firmicutes    | Clostridia   | 0                  | 0                   | 0                  | 0                   |
| <b>seq558</b> | Firmicutes    | Clostridia   | 17                 | 13                  | 0                  | 0                   |

Sequence Count Table

|               | <b>Phylum</b> | <b>Class</b> | <b>Subject6WK0</b> | <b>Subject6WK12</b> | <b>Subject18WK0</b> | <b>Subject18WK12</b> |
|---------------|---------------|--------------|--------------------|---------------------|---------------------|----------------------|
| <b>seq345</b> | Firmicutes    | Clostridia   | 59                 | 63                  | 0                   | 0                    |
| <b>seq350</b> | Firmicutes    | Clostridia   | 0                  | 61                  | 0                   | 0                    |
| <b>seq351</b> | Firmicutes    | Clostridia   | 0                  | 0                   | 0                   | 0                    |
| <b>seq357</b> | Firmicutes    | Clostridia   | 0                  | 0                   | 35                  | 29                   |
| <b>seq358</b> | Firmicutes    | Clostridia   | 0                  | 0                   | 0                   | 0                    |
| <b>seq361</b> | Firmicutes    | Clostridia   | 28                 | 23                  | 0                   | 0                    |
| <b>seq363</b> | Firmicutes    | Clostridia   | 0                  | 0                   | 86                  | 69                   |
| <b>seq365</b> | Firmicutes    | Clostridia   | 0                  | 0                   | 0                   | 0                    |
| <b>seq379</b> | Firmicutes    | Clostridia   | 27                 | 43                  | 0                   | 0                    |
| <b>seq384</b> | Firmicutes    | Clostridia   | 25                 | 37                  | 0                   | 0                    |
| <b>seq390</b> | Firmicutes    | Clostridia   | 78                 | 39                  | 0                   | 0                    |
| <b>seq395</b> | Firmicutes    | Clostridia   | 0                  | 0                   | 0                   | 0                    |
| <b>seq416</b> | Firmicutes    | Clostridia   | 0                  | 0                   | 0                   | 0                    |
| <b>seq424</b> | Firmicutes    | Clostridia   | 0                  | 0                   | 0                   | 0                    |
| <b>seq443</b> | Firmicutes    | Clostridia   | 0                  | 0                   | 0                   | 0                    |
| <b>seq449</b> | Firmicutes    | Clostridia   | 0                  | 0                   | 0                   | 0                    |
| <b>seq459</b> | Firmicutes    | Clostridia   | 34                 | 34                  | 0                   | 0                    |
| <b>seq461</b> | Firmicutes    | Clostridia   | 0                  | 0                   | 0                   | 0                    |
| <b>seq465</b> | Firmicutes    | Clostridia   | 0                  | 0                   | 0                   | 0                    |
| <b>seq476</b> | Firmicutes    | Clostridia   | 0                  | 0                   | 0                   | 0                    |
| <b>seq480</b> | Firmicutes    | Clostridia   | 0                  | 0                   | 34                  | 0                    |
| <b>seq493</b> | Firmicutes    | Clostridia   | 0                  | 0                   | 0                   | 0                    |
| <b>seq502</b> | Firmicutes    | Clostridia   | 0                  | 0                   | 0                   | 0                    |
| <b>seq503</b> | Firmicutes    | Clostridia   | 0                  | 0                   | 0                   | 0                    |
| <b>seq512</b> | Firmicutes    | Clostridia   | 98                 | 39                  | 0                   | 0                    |
| <b>seq526</b> | Firmicutes    | Clostridia   | 0                  | 0                   | 0                   | 0                    |
| <b>seq532</b> | Firmicutes    | Clostridia   | 21                 | 38                  | 29                  | 23                   |
| <b>seq536</b> | Firmicutes    | Clostridia   | 0                  | 0                   | 0                   | 0                    |
| <b>seq537</b> | Firmicutes    | Clostridia   | 0                  | 0                   | 0                   | 0                    |
| <b>seq542</b> | Firmicutes    | Clostridia   | 0                  | 0                   | 0                   | 0                    |
| <b>seq556</b> | Firmicutes    | Clostridia   | 0                  | 0                   | 0                   | 0                    |
| <b>seq558</b> | Firmicutes    | Clostridia   | 33                 | 44                  | 0                   | 0                    |

Sequence Count Table

|               | <b>Phylum</b> | <b>Class</b> | <b>Subject19WK0</b> | <b>Subject19WK12</b> | <b>Subject20WK0</b> | <b>Subject20WK12</b> |
|---------------|---------------|--------------|---------------------|----------------------|---------------------|----------------------|
| <b>seq345</b> | Firmicutes    | Clostridia   | 0                   | 0                    | 0                   | 0                    |
| <b>seq350</b> | Firmicutes    | Clostridia   | 0                   | 0                    | 58                  | 27                   |
| <b>seq351</b> | Firmicutes    | Clostridia   | 0                   | 0                    | 0                   | 0                    |
| <b>seq357</b> | Firmicutes    | Clostridia   | 0                   | 0                    | 0                   | 0                    |
| <b>seq358</b> | Firmicutes    | Clostridia   | 0                   | 0                    | 0                   | 0                    |
| <b>seq361</b> | Firmicutes    | Clostridia   | 0                   | 0                    | 35                  | 57                   |
| <b>seq363</b> | Firmicutes    | Clostridia   | 63                  | 0                    | 0                   | 0                    |
| <b>seq365</b> | Firmicutes    | Clostridia   | 0                   | 0                    | 0                   | 0                    |
| <b>seq379</b> | Firmicutes    | Clostridia   | 30                  | 43                   | 48                  | 43                   |
| <b>seq384</b> | Firmicutes    | Clostridia   | 22                  | 82                   | 31                  | 45                   |
| <b>seq390</b> | Firmicutes    | Clostridia   | 0                   | 0                    | 128                 | 75                   |
| <b>seq395</b> | Firmicutes    | Clostridia   | 0                   | 0                    | 0                   | 0                    |
| <b>seq416</b> | Firmicutes    | Clostridia   | 0                   | 0                    | 1041                | 117                  |
| <b>seq424</b> | Firmicutes    | Clostridia   | 0                   | 0                    | 0                   | 0                    |
| <b>seq443</b> | Firmicutes    | Clostridia   | 0                   | 153                  | 0                   | 0                    |
| <b>seq449</b> | Firmicutes    | Clostridia   | 0                   | 0                    | 0                   | 0                    |
| <b>seq459</b> | Firmicutes    | Clostridia   | 0                   | 0                    | 235                 | 73                   |
| <b>seq461</b> | Firmicutes    | Clostridia   | 0                   | 0                    | 0                   | 0                    |
| <b>seq465</b> | Firmicutes    | Clostridia   | 0                   | 0                    | 0                   | 0                    |
| <b>seq476</b> | Firmicutes    | Clostridia   | 0                   | 0                    | 0                   | 0                    |
| <b>seq480</b> | Firmicutes    | Clostridia   | 61                  | 21                   | 0                   | 0                    |
| <b>seq493</b> | Firmicutes    | Clostridia   | 0                   | 0                    | 0                   | 0                    |
| <b>seq502</b> | Firmicutes    | Clostridia   | 0                   | 0                    | 0                   | 0                    |
| <b>seq503</b> | Firmicutes    | Clostridia   | 0                   | 0                    | 0                   | 0                    |
| <b>seq512</b> | Firmicutes    | Clostridia   | 0                   | 0                    | 12                  | 27                   |
| <b>seq526</b> | Firmicutes    | Clostridia   | 0                   | 0                    | 0                   | 0                    |
| <b>seq532</b> | Firmicutes    | Clostridia   | 12                  | 19                   | 13                  | 23                   |
| <b>seq536</b> | Firmicutes    | Clostridia   | 0                   | 0                    | 0                   | 0                    |
| <b>seq537</b> | Firmicutes    | Clostridia   | 369                 | 198                  | 0                   | 0                    |
| <b>seq542</b> | Firmicutes    | Clostridia   | 0                   | 0                    | 0                   | 0                    |
| <b>seq556</b> | Firmicutes    | Clostridia   | 338                 | 204                  | 0                   | 0                    |
| <b>seq558</b> | Firmicutes    | Clostridia   | 17                  | 0                    | 0                   | 0                    |

Sequence Count Table

|               | <b>Phylum</b> | <b>Class</b> | <b>Subject7WK0</b> | <b>Subject7WK12</b> | <b>Subject21WK0</b> | <b>Subject21WK12</b> |
|---------------|---------------|--------------|--------------------|---------------------|---------------------|----------------------|
| <b>seq345</b> | Firmicutes    | Clostridia   | 0                  | 0                   | 0                   | 0                    |
| <b>seq350</b> | Firmicutes    | Clostridia   | 0                  | 0                   | 0                   | 0                    |
| <b>seq351</b> | Firmicutes    | Clostridia   | 0                  | 0                   | 0                   | 0                    |
| <b>seq357</b> | Firmicutes    | Clostridia   | 45                 | 44                  | 119                 | 155                  |
| <b>seq358</b> | Firmicutes    | Clostridia   | 129                | 160                 | 0                   | 0                    |
| <b>seq361</b> | Firmicutes    | Clostridia   | 19                 | 19                  | 0                   | 0                    |
| <b>seq363</b> | Firmicutes    | Clostridia   | 23                 | 61                  | 0                   | 0                    |
| <b>seq365</b> | Firmicutes    | Clostridia   | 809                | 654                 | 0                   | 0                    |
| <b>seq379</b> | Firmicutes    | Clostridia   | 0                  | 0                   | 0                   | 0                    |
| <b>seq384</b> | Firmicutes    | Clostridia   | 0                  | 0                   | 0                   | 0                    |
| <b>seq390</b> | Firmicutes    | Clostridia   | 0                  | 0                   | 0                   | 0                    |
| <b>seq395</b> | Firmicutes    | Clostridia   | 0                  | 0                   | 0                   | 0                    |
| <b>seq416</b> | Firmicutes    | Clostridia   | 0                  | 0                   | 0                   | 0                    |
| <b>seq424</b> | Firmicutes    | Clostridia   | 0                  | 0                   | 0                   | 0                    |
| <b>seq443</b> | Firmicutes    | Clostridia   | 0                  | 0                   | 0                   | 0                    |
| <b>seq449</b> | Firmicutes    | Clostridia   | 0                  | 0                   | 0                   | 0                    |
| <b>seq459</b> | Firmicutes    | Clostridia   | 0                  | 0                   | 0                   | 0                    |
| <b>seq461</b> | Firmicutes    | Clostridia   | 0                  | 0                   | 0                   | 0                    |
| <b>seq465</b> | Firmicutes    | Clostridia   | 0                  | 0                   | 0                   | 0                    |
| <b>seq476</b> | Firmicutes    | Clostridia   | 0                  | 0                   | 0                   | 0                    |
| <b>seq480</b> | Firmicutes    | Clostridia   | 0                  | 0                   | 79                  | 122                  |
| <b>seq493</b> | Firmicutes    | Clostridia   | 0                  | 20                  | 0                   | 0                    |
| <b>seq502</b> | Firmicutes    | Clostridia   | 0                  | 0                   | 0                   | 0                    |
| <b>seq503</b> | Firmicutes    | Clostridia   | 0                  | 0                   | 0                   | 0                    |
| <b>seq512</b> | Firmicutes    | Clostridia   | 0                  | 0                   | 0                   | 0                    |
| <b>seq526</b> | Firmicutes    | Clostridia   | 0                  | 0                   | 0                   | 0                    |
| <b>seq532</b> | Firmicutes    | Clostridia   | 0                  | 0                   | 0                   | 0                    |
| <b>seq536</b> | Firmicutes    | Clostridia   | 0                  | 0                   | 0                   | 0                    |
| <b>seq537</b> | Firmicutes    | Clostridia   | 0                  | 0                   | 0                   | 0                    |
| <b>seq542</b> | Firmicutes    | Clostridia   | 20                 | 31                  | 0                   | 0                    |
| <b>seq556</b> | Firmicutes    | Clostridia   | 0                  | 0                   | 0                   | 0                    |
| <b>seq558</b> | Firmicutes    | Clostridia   | 0                  | 0                   | 0                   | 0                    |



Sequence Count Table

|               | <b>Phylum</b> | <b>Class</b> | <b>Subject8WK0</b> | <b>Subject8WK12</b> | <b>Subject9WK0</b> | <b>Subject9WK12</b> |
|---------------|---------------|--------------|--------------------|---------------------|--------------------|---------------------|
| <b>seq345</b> | Firmicutes    | Clostridia   | 0                  | 0                   | 0                  | 0                   |
| <b>seq350</b> | Firmicutes    | Clostridia   | 30                 | 45                  | 56                 | 0                   |
| <b>seq351</b> | Firmicutes    | Clostridia   | 0                  | 0                   | 0                  | 0                   |
| <b>seq357</b> | Firmicutes    | Clostridia   | 0                  | 0                   | 35                 | 27                  |
| <b>seq358</b> | Firmicutes    | Clostridia   | 0                  | 0                   | 105                | 0                   |
| <b>seq361</b> | Firmicutes    | Clostridia   | 70                 | 36                  | 0                  | 0                   |
| <b>seq363</b> | Firmicutes    | Clostridia   | 64                 | 0                   | 58                 | 202                 |
| <b>seq365</b> | Firmicutes    | Clostridia   | 0                  | 0                   | 0                  | 0                   |
| <b>seq379</b> | Firmicutes    | Clostridia   | 62                 | 46                  | 0                  | 0                   |
| <b>seq384</b> | Firmicutes    | Clostridia   | 28                 | 37                  | 0                  | 0                   |
| <b>seq390</b> | Firmicutes    | Clostridia   | 39                 | 34                  | 0                  | 0                   |
| <b>seq395</b> | Firmicutes    | Clostridia   | 0                  | 0                   | 0                  | 1287                |
| <b>seq416</b> | Firmicutes    | Clostridia   | 0                  | 0                   | 0                  | 0                   |
| <b>seq424</b> | Firmicutes    | Clostridia   | 0                  | 0                   | 269                | 284                 |
| <b>seq443</b> | Firmicutes    | Clostridia   | 0                  | 0                   | 0                  | 0                   |
| <b>seq449</b> | Firmicutes    | Clostridia   | 0                  | 0                   | 0                  | 0                   |
| <b>seq459</b> | Firmicutes    | Clostridia   | 0                  | 11                  | 0                  | 0                   |
| <b>seq461</b> | Firmicutes    | Clostridia   | 0                  | 0                   | 151                | 794                 |
| <b>seq465</b> | Firmicutes    | Clostridia   | 0                  | 0                   | 0                  | 0                   |
| <b>seq476</b> | Firmicutes    | Clostridia   | 0                  | 0                   | 0                  | 0                   |
| <b>seq480</b> | Firmicutes    | Clostridia   | 0                  | 0                   | 0                  | 63                  |
| <b>seq493</b> | Firmicutes    | Clostridia   | 0                  | 0                   | 0                  | 0                   |
| <b>seq502</b> | Firmicutes    | Clostridia   | 0                  | 0                   | 0                  | 0                   |
| <b>seq503</b> | Firmicutes    | Clostridia   | 0                  | 0                   | 311                | 227                 |
| <b>seq512</b> | Firmicutes    | Clostridia   | 0                  | 48                  | 0                  | 0                   |
| <b>seq526</b> | Firmicutes    | Clostridia   | 0                  | 0                   | 0                  | 0                   |
| <b>seq532</b> | Firmicutes    | Clostridia   | 15                 | 38                  | 0                  | 0                   |
| <b>seq536</b> | Firmicutes    | Clostridia   | 0                  | 0                   | 0                  | 0                   |
| <b>seq537</b> | Firmicutes    | Clostridia   | 0                  | 0                   | 0                  | 0                   |
| <b>seq542</b> | Firmicutes    | Clostridia   | 0                  | 0                   | 0                  | 0                   |
| <b>seq556</b> | Firmicutes    | Clostridia   | 0                  | 0                   | 0                  | 0                   |
| <b>seq558</b> | Firmicutes    | Clostridia   | 17                 | 71                  | 12                 | 0                   |

Sequence Count Table

|               | <b>Phylum</b> | <b>Class</b> | <b>Subject10WK0</b> | <b>Subject10WK12</b> | <b>Subject22WK0</b> | <b>Subject22WK12</b> |
|---------------|---------------|--------------|---------------------|----------------------|---------------------|----------------------|
| <b>seq345</b> | Firmicutes    | Clostridia   | 0                   | 0                    | 0                   | 0                    |
| <b>seq350</b> | Firmicutes    | Clostridia   | 0                   | 0                    | 0                   | 0                    |
| <b>seq351</b> | Firmicutes    | Clostridia   | 238                 | 146                  | 0                   | 0                    |
| <b>seq357</b> | Firmicutes    | Clostridia   | 97                  | 38                   | 0                   | 0                    |
| <b>seq358</b> | Firmicutes    | Clostridia   | 300                 | 139                  | 0                   | 0                    |
| <b>seq361</b> | Firmicutes    | Clostridia   | 0                   | 0                    | 0                   | 0                    |
| <b>seq363</b> | Firmicutes    | Clostridia   | 73                  | 38                   | 0                   | 0                    |
| <b>seq365</b> | Firmicutes    | Clostridia   | 0                   | 0                    | 0                   | 0                    |
| <b>seq379</b> | Firmicutes    | Clostridia   | 0                   | 0                    | 0                   | 0                    |
| <b>seq384</b> | Firmicutes    | Clostridia   | 0                   | 0                    | 106                 | 31                   |
| <b>seq390</b> | Firmicutes    | Clostridia   | 0                   | 0                    | 0                   | 17                   |
| <b>seq395</b> | Firmicutes    | Clostridia   | 0                   | 0                    | 0                   | 0                    |
| <b>seq416</b> | Firmicutes    | Clostridia   | 0                   | 0                    | 0                   | 0                    |
| <b>seq424</b> | Firmicutes    | Clostridia   | 0                   | 0                    | 0                   | 0                    |
| <b>seq443</b> | Firmicutes    | Clostridia   | 0                   | 0                    | 106                 | 88                   |
| <b>seq449</b> | Firmicutes    | Clostridia   | 0                   | 0                    | 0                   | 0                    |
| <b>seq459</b> | Firmicutes    | Clostridia   | 0                   | 0                    | 6                   | 14                   |
| <b>seq461</b> | Firmicutes    | Clostridia   | 0                   | 0                    | 0                   | 0                    |
| <b>seq465</b> | Firmicutes    | Clostridia   | 0                   | 0                    | 0                   | 0                    |
| <b>seq476</b> | Firmicutes    | Clostridia   | 0                   | 0                    | 0                   | 0                    |
| <b>seq480</b> | Firmicutes    | Clostridia   | 89                  | 51                   | 0                   | 0                    |
| <b>seq493</b> | Firmicutes    | Clostridia   | 0                   | 0                    | 0                   | 0                    |
| <b>seq502</b> | Firmicutes    | Clostridia   | 0                   | 0                    | 64                  | 0                    |
| <b>seq503</b> | Firmicutes    | Clostridia   | 0                   | 0                    | 0                   | 0                    |
| <b>seq512</b> | Firmicutes    | Clostridia   | 0                   | 0                    | 0                   | 0                    |
| <b>seq526</b> | Firmicutes    | Clostridia   | 395                 | 317                  | 0                   | 0                    |
| <b>seq532</b> | Firmicutes    | Clostridia   | 0                   | 0                    | 0                   | 0                    |
| <b>seq536</b> | Firmicutes    | Clostridia   | 0                   | 0                    | 0                   | 0                    |
| <b>seq537</b> | Firmicutes    | Clostridia   | 0                   | 0                    | 0                   | 0                    |
| <b>seq542</b> | Firmicutes    | Clostridia   | 169                 | 112                  | 0                   | 0                    |
| <b>seq556</b> | Firmicutes    | Clostridia   | 0                   | 0                    | 0                   | 0                    |
| <b>seq558</b> | Firmicutes    | Clostridia   | 77                  | 26                   | 0                   | 0                    |

Sequence Count Table

|               | <b>Phylum</b> | <b>Class</b> | <b>Subject23WK0</b> | <b>Subject23WK12</b> | <b>Subject24WK0</b> | <b>Subject24WK12</b> |
|---------------|---------------|--------------|---------------------|----------------------|---------------------|----------------------|
| <b>seq345</b> | Firmicutes    | Clostridia   | 83                  | 79                   | 0                   | 0                    |
| <b>seq350</b> | Firmicutes    | Clostridia   | 0                   | 0                    | 87                  | 20                   |
| <b>seq351</b> | Firmicutes    | Clostridia   | 0                   | 0                    | 0                   | 0                    |
| <b>seq357</b> | Firmicutes    | Clostridia   | 0                   | 0                    | 13                  | 27                   |
| <b>seq358</b> | Firmicutes    | Clostridia   | 0                   | 0                    | 0                   | 0                    |
| <b>seq361</b> | Firmicutes    | Clostridia   | 67                  | 77                   | 62                  | 24                   |
| <b>seq363</b> | Firmicutes    | Clostridia   | 0                   | 0                    | 0                   | 0                    |
| <b>seq365</b> | Firmicutes    | Clostridia   | 0                   | 0                    | 0                   | 0                    |
| <b>seq379</b> | Firmicutes    | Clostridia   | 0                   | 0                    | 83                  | 78                   |
| <b>seq384</b> | Firmicutes    | Clostridia   | 72                  | 101                  | 49                  | 82                   |
| <b>seq390</b> | Firmicutes    | Clostridia   | 46                  | 42                   | 27                  | 0                    |
| <b>seq395</b> | Firmicutes    | Clostridia   | 0                   | 0                    | 0                   | 0                    |
| <b>seq416</b> | Firmicutes    | Clostridia   | 0                   | 0                    | 0                   | 0                    |
| <b>seq424</b> | Firmicutes    | Clostridia   | 0                   | 0                    | 0                   | 0                    |
| <b>seq443</b> | Firmicutes    | Clostridia   | 80                  | 94                   | 168                 | 177                  |
| <b>seq449</b> | Firmicutes    | Clostridia   | 117                 | 124                  | 0                   | 0                    |
| <b>seq459</b> | Firmicutes    | Clostridia   | 0                   | 0                    | 0                   | 13                   |
| <b>seq461</b> | Firmicutes    | Clostridia   | 0                   | 0                    | 0                   | 0                    |
| <b>seq465</b> | Firmicutes    | Clostridia   | 0                   | 0                    | 0                   | 0                    |
| <b>seq476</b> | Firmicutes    | Clostridia   | 0                   | 0                    | 0                   | 0                    |
| <b>seq480</b> | Firmicutes    | Clostridia   | 0                   | 0                    | 0                   | 0                    |
| <b>seq493</b> | Firmicutes    | Clostridia   | 0                   | 0                    | 0                   | 0                    |
| <b>seq502</b> | Firmicutes    | Clostridia   | 0                   | 0                    | 0                   | 0                    |
| <b>seq503</b> | Firmicutes    | Clostridia   | 0                   | 0                    | 0                   | 0                    |
| <b>seq512</b> | Firmicutes    | Clostridia   | 0                   | 0                    | 0                   | 0                    |
| <b>seq526</b> | Firmicutes    | Clostridia   | 0                   | 0                    | 0                   | 0                    |
| <b>seq532</b> | Firmicutes    | Clostridia   | 35                  | 47                   | 9                   | 17                   |
| <b>seq536</b> | Firmicutes    | Clostridia   | 0                   | 0                    | 0                   | 0                    |
| <b>seq537</b> | Firmicutes    | Clostridia   | 0                   | 0                    | 0                   | 0                    |
| <b>seq542</b> | Firmicutes    | Clostridia   | 0                   | 0                    | 0                   | 0                    |
| <b>seq556</b> | Firmicutes    | Clostridia   | 0                   | 0                    | 0                   | 0                    |
| <b>seq558</b> | Firmicutes    | Clostridia   | 0                   | 0                    | 0                   | 43                   |

Sequence Count Table

|               | <b>Phylum</b> | <b>Class</b> | <b>Subject11WK0</b> | <b>Subject11WK12</b> | <b>Subject12WK0</b> | <b>Subject12WK12</b> |
|---------------|---------------|--------------|---------------------|----------------------|---------------------|----------------------|
| <b>seq345</b> | Firmicutes    | Clostridia   | 0                   | 0                    | 0                   | 0                    |
| <b>seq350</b> | Firmicutes    | Clostridia   | 0                   | 0                    | 0                   | 21                   |
| <b>seq351</b> | Firmicutes    | Clostridia   | 0                   | 0                    | 0                   | 0                    |
| <b>seq357</b> | Firmicutes    | Clostridia   | 143                 | 197                  | 0                   | 10                   |
| <b>seq358</b> | Firmicutes    | Clostridia   | 0                   | 0                    | 0                   | 0                    |
| <b>seq361</b> | Firmicutes    | Clostridia   | 0                   | 0                    | 19                  | 57                   |
| <b>seq363</b> | Firmicutes    | Clostridia   | 0                   | 0                    | 0                   | 0                    |
| <b>seq365</b> | Firmicutes    | Clostridia   | 0                   | 0                    | 0                   | 0                    |
| <b>seq379</b> | Firmicutes    | Clostridia   | 0                   | 0                    | 24                  | 70                   |
| <b>seq384</b> | Firmicutes    | Clostridia   | 0                   | 0                    | 0                   | 0                    |
| <b>seq390</b> | Firmicutes    | Clostridia   | 0                   | 0                    | 25                  | 0                    |
| <b>seq395</b> | Firmicutes    | Clostridia   | 0                   | 0                    | 0                   | 0                    |
| <b>seq416</b> | Firmicutes    | Clostridia   | 0                   | 0                    | 0                   | 0                    |
| <b>seq424</b> | Firmicutes    | Clostridia   | 0                   | 0                    | 0                   | 0                    |
| <b>seq443</b> | Firmicutes    | Clostridia   | 0                   | 0                    | 0                   | 0                    |
| <b>seq449</b> | Firmicutes    | Clostridia   | 0                   | 0                    | 0                   | 0                    |
| <b>seq459</b> | Firmicutes    | Clostridia   | 0                   | 0                    | 0                   | 0                    |
| <b>seq461</b> | Firmicutes    | Clostridia   | 0                   | 0                    | 0                   | 0                    |
| <b>seq465</b> | Firmicutes    | Clostridia   | 0                   | 0                    | 0                   | 0                    |
| <b>seq476</b> | Firmicutes    | Clostridia   | 0                   | 0                    | 0                   | 0                    |
| <b>seq480</b> | Firmicutes    | Clostridia   | 68                  | 52                   | 0                   | 0                    |
| <b>seq493</b> | Firmicutes    | Clostridia   | 0                   | 0                    | 0                   | 0                    |
| <b>seq502</b> | Firmicutes    | Clostridia   | 0                   | 0                    | 0                   | 0                    |
| <b>seq503</b> | Firmicutes    | Clostridia   | 0                   | 0                    | 0                   | 0                    |
| <b>seq512</b> | Firmicutes    | Clostridia   | 0                   | 0                    | 0                   | 0                    |
| <b>seq526</b> | Firmicutes    | Clostridia   | 0                   | 0                    | 0                   | 0                    |
| <b>seq532</b> | Firmicutes    | Clostridia   | 0                   | 0                    | 9                   | 40                   |
| <b>seq536</b> | Firmicutes    | Clostridia   | 0                   | 0                    | 0                   | 0                    |
| <b>seq537</b> | Firmicutes    | Clostridia   | 0                   | 0                    | 0                   | 0                    |
| <b>seq542</b> | Firmicutes    | Clostridia   | 0                   | 0                    | 0                   | 0                    |
| <b>seq556</b> | Firmicutes    | Clostridia   | 0                   | 0                    | 0                   | 0                    |
| <b>seq558</b> | Firmicutes    | Clostridia   | 0                   | 0                    | 19                  | 16                   |

Sequence Count Table

|               | <b>Phylum</b> | <b>Class</b> | <b>Subject25WK0</b> | <b>Subject25WK12</b> | <b>Subject38WK0</b> | <b>Subject38WK12</b> |
|---------------|---------------|--------------|---------------------|----------------------|---------------------|----------------------|
| <b>seq345</b> | Firmicutes    | Clostridia   | 205                 | 201                  | 0                   | 0                    |
| <b>seq350</b> | Firmicutes    | Clostridia   | 45                  | 0                    | 0                   | 0                    |
| <b>seq351</b> | Firmicutes    | Clostridia   | 0                   | 0                    | 0                   | 0                    |
| <b>seq357</b> | Firmicutes    | Clostridia   | 0                   | 0                    | 0                   | 0                    |
| <b>seq358</b> | Firmicutes    | Clostridia   | 0                   | 59                   | 0                   | 0                    |
| <b>seq361</b> | Firmicutes    | Clostridia   | 0                   | 0                    | 0                   | 0                    |
| <b>seq363</b> | Firmicutes    | Clostridia   | 0                   | 0                    | 0                   | 0                    |
| <b>seq365</b> | Firmicutes    | Clostridia   | 0                   | 0                    | 0                   | 0                    |
| <b>seq379</b> | Firmicutes    | Clostridia   | 23                  | 0                    | 0                   | 0                    |
| <b>seq384</b> | Firmicutes    | Clostridia   | 0                   | 0                    | 0                   | 0                    |
| <b>seq390</b> | Firmicutes    | Clostridia   | 0                   | 0                    | 0                   | 0                    |
| <b>seq395</b> | Firmicutes    | Clostridia   | 0                   | 0                    | 0                   | 0                    |
| <b>seq416</b> | Firmicutes    | Clostridia   | 0                   | 0                    | 0                   | 0                    |
| <b>seq424</b> | Firmicutes    | Clostridia   | 0                   | 0                    | 0                   | 0                    |
| <b>seq443</b> | Firmicutes    | Clostridia   | 0                   | 0                    | 0                   | 0                    |
| <b>seq449</b> | Firmicutes    | Clostridia   | 0                   | 0                    | 0                   | 0                    |
| <b>seq459</b> | Firmicutes    | Clostridia   | 0                   | 0                    | 0                   | 0                    |
| <b>seq461</b> | Firmicutes    | Clostridia   | 0                   | 0                    | 0                   | 0                    |
| <b>seq465</b> | Firmicutes    | Clostridia   | 0                   | 0                    | 0                   | 0                    |
| <b>seq476</b> | Firmicutes    | Clostridia   | 482                 | 355                  | 0                   | 0                    |
| <b>seq480</b> | Firmicutes    | Clostridia   | 0                   | 0                    | 0                   | 0                    |
| <b>seq493</b> | Firmicutes    | Clostridia   | 0                   | 0                    | 0                   | 0                    |
| <b>seq502</b> | Firmicutes    | Clostridia   | 0                   | 0                    | 0                   | 0                    |
| <b>seq503</b> | Firmicutes    | Clostridia   | 0                   | 0                    | 0                   | 0                    |
| <b>seq512</b> | Firmicutes    | Clostridia   | 0                   | 0                    | 0                   | 0                    |
| <b>seq526</b> | Firmicutes    | Clostridia   | 0                   | 0                    | 0                   | 0                    |
| <b>seq532</b> | Firmicutes    | Clostridia   | 21                  | 0                    | 0                   | 0                    |
| <b>seq536</b> | Firmicutes    | Clostridia   | 0                   | 0                    | 0                   | 0                    |
| <b>seq537</b> | Firmicutes    | Clostridia   | 0                   | 0                    | 0                   | 0                    |
| <b>seq542</b> | Firmicutes    | Clostridia   | 0                   | 0                    | 0                   | 0                    |
| <b>seq556</b> | Firmicutes    | Clostridia   | 0                   | 0                    | 0                   | 0                    |
| <b>seq558</b> | Firmicutes    | Clostridia   | 78                  | 0                    | 0                   | 0                    |

Sequence Count Table

|               | <b>Phylum</b> | <b>Class</b> | <b>Subject31WK0</b> | <b>Subject31WK12</b> | <b>Subject32WK0</b> | <b>Subject32WK12</b> |
|---------------|---------------|--------------|---------------------|----------------------|---------------------|----------------------|
| <b>seq345</b> | Firmicutes    | Clostridia   | 0                   | 0                    | 160                 | 0                    |
| <b>seq350</b> | Firmicutes    | Clostridia   | 0                   | 0                    | 0                   | 0                    |
| <b>seq351</b> | Firmicutes    | Clostridia   | 0                   | 0                    | 0                   | 0                    |
| <b>seq357</b> | Firmicutes    | Clostridia   | 0                   | 0                    | 9                   | 0                    |
| <b>seq358</b> | Firmicutes    | Clostridia   | 0                   | 0                    | 0                   | 0                    |
| <b>seq361</b> | Firmicutes    | Clostridia   | 0                   | 0                    | 0                   | 0                    |
| <b>seq363</b> | Firmicutes    | Clostridia   | 0                   | 0                    | 0                   | 0                    |
| <b>seq365</b> | Firmicutes    | Clostridia   | 0                   | 0                    | 0                   | 0                    |
| <b>seq379</b> | Firmicutes    | Clostridia   | 0                   | 0                    | 0                   | 0                    |
| <b>seq384</b> | Firmicutes    | Clostridia   | 0                   | 0                    | 0                   | 0                    |
| <b>seq390</b> | Firmicutes    | Clostridia   | 0                   | 0                    | 0                   | 0                    |
| <b>seq395</b> | Firmicutes    | Clostridia   | 0                   | 0                    | 0                   | 0                    |
| <b>seq416</b> | Firmicutes    | Clostridia   | 0                   | 0                    | 0                   | 0                    |
| <b>seq424</b> | Firmicutes    | Clostridia   | 0                   | 0                    | 0                   | 0                    |
| <b>seq443</b> | Firmicutes    | Clostridia   | 0                   | 0                    | 0                   | 0                    |
| <b>seq449</b> | Firmicutes    | Clostridia   | 0                   | 0                    | 0                   | 0                    |
| <b>seq459</b> | Firmicutes    | Clostridia   | 0                   | 0                    | 0                   | 0                    |
| <b>seq461</b> | Firmicutes    | Clostridia   | 0                   | 0                    | 0                   | 0                    |
| <b>seq465</b> | Firmicutes    | Clostridia   | 0                   | 0                    | 0                   | 0                    |
| <b>seq476</b> | Firmicutes    | Clostridia   | 0                   | 0                    | 0                   | 0                    |
| <b>seq480</b> | Firmicutes    | Clostridia   | 0                   | 0                    | 0                   | 0                    |
| <b>seq493</b> | Firmicutes    | Clostridia   | 0                   | 0                    | 0                   | 0                    |
| <b>seq502</b> | Firmicutes    | Clostridia   | 0                   | 0                    | 0                   | 0                    |
| <b>seq503</b> | Firmicutes    | Clostridia   | 0                   | 0                    | 0                   | 0                    |
| <b>seq512</b> | Firmicutes    | Clostridia   | 0                   | 0                    | 0                   | 0                    |
| <b>seq526</b> | Firmicutes    | Clostridia   | 0                   | 0                    | 0                   | 0                    |
| <b>seq532</b> | Firmicutes    | Clostridia   | 0                   | 0                    | 13                  | 0                    |
| <b>seq536</b> | Firmicutes    | Clostridia   | 0                   | 0                    | 0                   | 0                    |
| <b>seq537</b> | Firmicutes    | Clostridia   | 0                   | 0                    | 0                   | 0                    |
| <b>seq542</b> | Firmicutes    | Clostridia   | 0                   | 0                    | 0                   | 0                    |
| <b>seq556</b> | Firmicutes    | Clostridia   | 0                   | 0                    | 0                   | 0                    |
| <b>seq558</b> | Firmicutes    | Clostridia   | 0                   | 0                    | 0                   | 0                    |

Sequence Count Table

|               | <b>Phylum</b> | <b>Class</b> | <b>Subject13WK0</b> | <b>Subject13WK12</b> | <b>Subject39WK0</b> | <b>Subject39WK12</b> |
|---------------|---------------|--------------|---------------------|----------------------|---------------------|----------------------|
| <b>seq345</b> | Firmicutes    | Clostridia   | 70                  | 0                    | 0                   | 0                    |
| <b>seq350</b> | Firmicutes    | Clostridia   | 0                   | 0                    | 0                   | 30                   |
| <b>seq351</b> | Firmicutes    | Clostridia   | 10                  | 50                   | 0                   | 0                    |
| <b>seq357</b> | Firmicutes    | Clostridia   | 11                  | 25                   | 0                   | 0                    |
| <b>seq358</b> | Firmicutes    | Clostridia   | 56                  | 38                   | 0                   | 0                    |
| <b>seq361</b> | Firmicutes    | Clostridia   | 26                  | 0                    | 0                   | 37                   |
| <b>seq363</b> | Firmicutes    | Clostridia   | 0                   | 0                    | 0                   | 56                   |
| <b>seq365</b> | Firmicutes    | Clostridia   | 0                   | 0                    | 0                   | 0                    |
| <b>seq379</b> | Firmicutes    | Clostridia   | 0                   | 0                    | 0                   | 17                   |
| <b>seq384</b> | Firmicutes    | Clostridia   | 0                   | 0                    | 0                   | 71                   |
| <b>seq390</b> | Firmicutes    | Clostridia   | 0                   | 0                    | 0                   | 15                   |
| <b>seq395</b> | Firmicutes    | Clostridia   | 0                   | 0                    | 0                   | 0                    |
| <b>seq416</b> | Firmicutes    | Clostridia   | 0                   | 0                    | 0                   | 0                    |
| <b>seq424</b> | Firmicutes    | Clostridia   | 0                   | 0                    | 0                   | 0                    |
| <b>seq443</b> | Firmicutes    | Clostridia   | 0                   | 0                    | 0                   | 0                    |
| <b>seq449</b> | Firmicutes    | Clostridia   | 0                   | 0                    | 0                   | 122                  |
| <b>seq459</b> | Firmicutes    | Clostridia   | 0                   | 29                   | 0                   | 0                    |
| <b>seq461</b> | Firmicutes    | Clostridia   | 0                   | 0                    | 0                   | 0                    |
| <b>seq465</b> | Firmicutes    | Clostridia   | 0                   | 0                    | 0                   | 0                    |
| <b>seq476</b> | Firmicutes    | Clostridia   | 0                   | 0                    | 0                   | 0                    |
| <b>seq480</b> | Firmicutes    | Clostridia   | 0                   | 0                    | 0                   | 0                    |
| <b>seq493</b> | Firmicutes    | Clostridia   | 0                   | 0                    | 0                   | 0                    |
| <b>seq502</b> | Firmicutes    | Clostridia   | 0                   | 0                    | 0                   | 0                    |
| <b>seq503</b> | Firmicutes    | Clostridia   | 0                   | 0                    | 0                   | 0                    |
| <b>seq512</b> | Firmicutes    | Clostridia   | 0                   | 0                    | 0                   | 0                    |
| <b>seq526</b> | Firmicutes    | Clostridia   | 0                   | 0                    | 0                   | 0                    |
| <b>seq532</b> | Firmicutes    | Clostridia   | 10                  | 5                    | 0                   | 15                   |
| <b>seq536</b> | Firmicutes    | Clostridia   | 0                   | 0                    | 0                   | 0                    |
| <b>seq537</b> | Firmicutes    | Clostridia   | 0                   | 0                    | 0                   | 0                    |
| <b>seq542</b> | Firmicutes    | Clostridia   | 19                  | 0                    | 0                   | 0                    |
| <b>seq556</b> | Firmicutes    | Clostridia   | 0                   | 0                    | 0                   | 0                    |
| <b>seq558</b> | Firmicutes    | Clostridia   | 12                  | 7                    | 0                   | 0                    |

Sequence Count Table

|               | <b>Phylum</b> | <b>Class</b> | <b>Subject26WK0</b> | <b>Subject26WK12</b> | <b>Subject14WK0</b> | <b>Subject14WK12</b> |
|---------------|---------------|--------------|---------------------|----------------------|---------------------|----------------------|
| <b>seq345</b> | Firmicutes    | Clostridia   | 421                 | 266                  | 0                   | 0                    |
| <b>seq350</b> | Firmicutes    | Clostridia   | 441                 | 121                  | 8                   | 0                    |
| <b>seq351</b> | Firmicutes    | Clostridia   | 0                   | 0                    | 0                   | 0                    |
| <b>seq357</b> | Firmicutes    | Clostridia   | 94                  | 38                   | 0                   | 0                    |
| <b>seq358</b> | Firmicutes    | Clostridia   | 0                   | 0                    | 0                   | 0                    |
| <b>seq361</b> | Firmicutes    | Clostridia   | 0                   | 0                    | 90                  | 19                   |
| <b>seq363</b> | Firmicutes    | Clostridia   | 23                  | 135                  | 0                   | 0                    |
| <b>seq365</b> | Firmicutes    | Clostridia   | 0                   | 0                    | 0                   | 0                    |
| <b>seq379</b> | Firmicutes    | Clostridia   | 0                   | 0                    | 97                  | 61                   |
| <b>seq384</b> | Firmicutes    | Clostridia   | 0                   | 0                    | 58                  | 27                   |
| <b>seq390</b> | Firmicutes    | Clostridia   | 0                   | 0                    | 0                   | 0                    |
| <b>seq395</b> | Firmicutes    | Clostridia   | 0                   | 0                    | 0                   | 0                    |
| <b>seq416</b> | Firmicutes    | Clostridia   | 0                   | 0                    | 0                   | 0                    |
| <b>seq424</b> | Firmicutes    | Clostridia   | 0                   | 0                    | 0                   | 0                    |
| <b>seq443</b> | Firmicutes    | Clostridia   | 0                   | 0                    | 0                   | 156                  |
| <b>seq449</b> | Firmicutes    | Clostridia   | 0                   | 0                    | 0                   | 0                    |
| <b>seq459</b> | Firmicutes    | Clostridia   | 0                   | 0                    | 0                   | 9                    |
| <b>seq461</b> | Firmicutes    | Clostridia   | 0                   | 0                    | 0                   | 0                    |
| <b>seq465</b> | Firmicutes    | Clostridia   | 0                   | 0                    | 0                   | 0                    |
| <b>seq476</b> | Firmicutes    | Clostridia   | 0                   | 0                    | 0                   | 0                    |
| <b>seq480</b> | Firmicutes    | Clostridia   | 27                  | 17                   | 0                   | 0                    |
| <b>seq493</b> | Firmicutes    | Clostridia   | 301                 | 188                  | 0                   | 0                    |
| <b>seq502</b> | Firmicutes    | Clostridia   | 0                   | 0                    | 0                   | 0                    |
| <b>seq503</b> | Firmicutes    | Clostridia   | 0                   | 0                    | 0                   | 0                    |
| <b>seq512</b> | Firmicutes    | Clostridia   | 0                   | 0                    | 0                   | 0                    |
| <b>seq526</b> | Firmicutes    | Clostridia   | 0                   | 0                    | 0                   | 0                    |
| <b>seq532</b> | Firmicutes    | Clostridia   | 0                   | 0                    | 10                  | 22                   |
| <b>seq536</b> | Firmicutes    | Clostridia   | 0                   | 0                    | 0                   | 0                    |
| <b>seq537</b> | Firmicutes    | Clostridia   | 0                   | 0                    | 0                   | 0                    |
| <b>seq542</b> | Firmicutes    | Clostridia   | 0                   | 0                    | 0                   | 0                    |
| <b>seq556</b> | Firmicutes    | Clostridia   | 0                   | 0                    | 0                   | 0                    |
| <b>seq558</b> | Firmicutes    | Clostridia   | 0                   | 0                    | 18                  | 0                    |



Sequence Count Table

|               | <b>Phylum</b> | <b>Class</b> | <b>Subject27WK0</b> | <b>Subject27WK12</b> | <b>Subject15WK0</b> | <b>Subject15WK12</b> |
|---------------|---------------|--------------|---------------------|----------------------|---------------------|----------------------|
| <b>seq345</b> | Firmicutes    | Clostridia   | 0                   | 0                    | 0                   | 0                    |
| <b>seq350</b> | Firmicutes    | Clostridia   | 0                   | 54                   | 0                   | 0                    |
| <b>seq351</b> | Firmicutes    | Clostridia   | 0                   | 0                    | 0                   | 0                    |
| <b>seq357</b> | Firmicutes    | Clostridia   | 32                  | 0                    | 13                  | 10                   |
| <b>seq358</b> | Firmicutes    | Clostridia   | 0                   | 0                    | 0                   | 0                    |
| <b>seq361</b> | Firmicutes    | Clostridia   | 22                  | 27                   | 44                  | 68                   |
| <b>seq363</b> | Firmicutes    | Clostridia   | 28                  | 0                    | 57                  | 103                  |
| <b>seq365</b> | Firmicutes    | Clostridia   | 0                   | 0                    | 0                   | 0                    |
| <b>seq379</b> | Firmicutes    | Clostridia   | 0                   | 0                    | 38                  | 98                   |
| <b>seq384</b> | Firmicutes    | Clostridia   | 21                  | 29                   | 0                   | 0                    |
| <b>seq390</b> | Firmicutes    | Clostridia   | 0                   | 0                    | 0                   | 0                    |
| <b>seq395</b> | Firmicutes    | Clostridia   | 0                   | 0                    | 0                   | 0                    |
| <b>seq416</b> | Firmicutes    | Clostridia   | 0                   | 0                    | 0                   | 0                    |
| <b>seq424</b> | Firmicutes    | Clostridia   | 66                  | 0                    | 0                   | 0                    |
| <b>seq443</b> | Firmicutes    | Clostridia   | 0                   | 0                    | 0                   | 0                    |
| <b>seq449</b> | Firmicutes    | Clostridia   | 0                   | 0                    | 0                   | 0                    |
| <b>seq459</b> | Firmicutes    | Clostridia   | 0                   | 0                    | 0                   | 0                    |
| <b>seq461</b> | Firmicutes    | Clostridia   | 0                   | 0                    | 0                   | 0                    |
| <b>seq465</b> | Firmicutes    | Clostridia   | 0                   | 0                    | 0                   | 0                    |
| <b>seq476</b> | Firmicutes    | Clostridia   | 0                   | 0                    | 0                   | 0                    |
| <b>seq480</b> | Firmicutes    | Clostridia   | 37                  | 0                    | 0                   | 0                    |
| <b>seq493</b> | Firmicutes    | Clostridia   | 0                   | 0                    | 0                   | 0                    |
| <b>seq502</b> | Firmicutes    | Clostridia   | 203                 | 112                  | 0                   | 0                    |
| <b>seq503</b> | Firmicutes    | Clostridia   | 0                   | 20                   | 55                  | 167                  |
| <b>seq512</b> | Firmicutes    | Clostridia   | 0                   | 0                    | 0                   | 0                    |
| <b>seq526</b> | Firmicutes    | Clostridia   | 0                   | 0                    | 0                   | 0                    |
| <b>seq532</b> | Firmicutes    | Clostridia   | 0                   | 0                    | 0                   | 0                    |
| <b>seq536</b> | Firmicutes    | Clostridia   | 0                   | 0                    | 0                   | 0                    |
| <b>seq537</b> | Firmicutes    | Clostridia   | 0                   | 0                    | 0                   | 0                    |
| <b>seq542</b> | Firmicutes    | Clostridia   | 75                  | 120                  | 65                  | 45                   |
| <b>seq556</b> | Firmicutes    | Clostridia   | 0                   | 0                    | 0                   | 0                    |
| <b>seq558</b> | Firmicutes    | Clostridia   | 0                   | 0                    | 0                   | 0                    |

Sequence Count Table

|               | <b>Phylum</b> | <b>Class</b> | <b>Δ</b> |  |  |  |
|---------------|---------------|--------------|----------|--|--|--|
| <b>seq345</b> | Firmicutes    | Clostridia   |          |  |  |  |
| <b>seq350</b> | Firmicutes    | Clostridia   |          |  |  |  |
| <b>seq351</b> | Firmicutes    | Clostridia   |          |  |  |  |
| <b>seq357</b> | Firmicutes    | Clostridia   |          |  |  |  |
| <b>seq358</b> | Firmicutes    | Clostridia   |          |  |  |  |
| <b>seq361</b> | Firmicutes    | Clostridia   |          |  |  |  |
| <b>seq363</b> | Firmicutes    | Clostridia   |          |  |  |  |
| <b>seq365</b> | Firmicutes    | Clostridia   |          |  |  |  |
| <b>seq379</b> | Firmicutes    | Clostridia   |          |  |  |  |
| <b>seq384</b> | Firmicutes    | Clostridia   |          |  |  |  |
| <b>seq390</b> | Firmicutes    | Clostridia   |          |  |  |  |
| <b>seq395</b> | Firmicutes    | Clostridia   |          |  |  |  |
| <b>seq416</b> | Firmicutes    | Clostridia   |          |  |  |  |
| <b>seq424</b> | Firmicutes    | Clostridia   |          |  |  |  |
| <b>seq443</b> | Firmicutes    | Clostridia   |          |  |  |  |
| <b>seq449</b> | Firmicutes    | Clostridia   |          |  |  |  |
| <b>seq459</b> | Firmicutes    | Clostridia   |          |  |  |  |
| <b>seq461</b> | Firmicutes    | Clostridia   |          |  |  |  |
| <b>seq465</b> | Firmicutes    | Clostridia   |          |  |  |  |
| <b>seq476</b> | Firmicutes    | Clostridia   |          |  |  |  |
| <b>seq480</b> | Firmicutes    | Clostridia   |          |  |  |  |
| <b>seq493</b> | Firmicutes    | Clostridia   |          |  |  |  |
| <b>seq502</b> | Firmicutes    | Clostridia   |          |  |  |  |
| <b>seq503</b> | Firmicutes    | Clostridia   |          |  |  |  |
| <b>seq512</b> | Firmicutes    | Clostridia   |          |  |  |  |
| <b>seq526</b> | Firmicutes    | Clostridia   |          |  |  |  |
| <b>seq532</b> | Firmicutes    | Clostridia   |          |  |  |  |
| <b>seq536</b> | Firmicutes    | Clostridia   |          |  |  |  |
| <b>seq537</b> | Firmicutes    | Clostridia   |          |  |  |  |
| <b>seq542</b> | Firmicutes    | Clostridia   |          |  |  |  |
| <b>seq556</b> | Firmicutes    | Clostridia   |          |  |  |  |
| <b>seq558</b> | Firmicutes    | Clostridia   |          |  |  |  |

Sequence Count Table

|               | <b>Phylum</b> | <b>Class</b> | <b>Order</b>  | <b>Family</b>   |
|---------------|---------------|--------------|---------------|-----------------|
| <b>seq559</b> | Firmicutes    | Clostridia   | Clostridiales | Lachnospiraceae |
| <b>seq566</b> | Firmicutes    | Clostridia   | Clostridiales | Lachnospiraceae |
| <b>seq568</b> | Firmicutes    | Clostridia   | Clostridiales | Lachnospiraceae |
| <b>seq569</b> | Firmicutes    | Clostridia   | Clostridiales | Lachnospiraceae |
| <b>seq574</b> | Firmicutes    | Clostridia   | Clostridiales | Lachnospiraceae |
| <b>seq610</b> | Firmicutes    | Clostridia   | Clostridiales | Lachnospiraceae |
| <b>seq615</b> | Firmicutes    | Clostridia   | Clostridiales | Lachnospiraceae |
| <b>seq624</b> | Firmicutes    | Clostridia   | Clostridiales | Lachnospiraceae |
| <b>seq627</b> | Firmicutes    | Clostridia   | Clostridiales | Lachnospiraceae |
| <b>seq635</b> | Firmicutes    | Clostridia   | Clostridiales | Lachnospiraceae |
| <b>seq640</b> | Firmicutes    | Clostridia   | Clostridiales | Lachnospiraceae |
| <b>seq643</b> | Firmicutes    | Clostridia   | Clostridiales | Lachnospiraceae |
| <b>seq654</b> | Firmicutes    | Clostridia   | Clostridiales | Lachnospiraceae |
| <b>seq655</b> | Firmicutes    | Clostridia   | Clostridiales | Lachnospiraceae |
| <b>seq656</b> | Firmicutes    | Clostridia   | Clostridiales | Lachnospiraceae |
| <b>seq659</b> | Firmicutes    | Clostridia   | Clostridiales | Lachnospiraceae |
| <b>seq662</b> | Firmicutes    | Clostridia   | Clostridiales | Lachnospiraceae |
| <b>seq665</b> | Firmicutes    | Clostridia   | Clostridiales | Lachnospiraceae |
| <b>seq678</b> | Firmicutes    | Clostridia   | Clostridiales | Lachnospiraceae |
| <b>seq681</b> | Firmicutes    | Clostridia   | Clostridiales | Lachnospiraceae |
| <b>seq682</b> | Firmicutes    | Clostridia   | Clostridiales | Lachnospiraceae |
| <b>seq684</b> | Firmicutes    | Clostridia   | Clostridiales | Lachnospiraceae |
| <b>seq689</b> | Firmicutes    | Clostridia   | Clostridiales | Lachnospiraceae |
| <b>seq695</b> | Firmicutes    | Clostridia   | Clostridiales | Lachnospiraceae |
| <b>seq696</b> | Firmicutes    | Clostridia   | Clostridiales | Lachnospiraceae |
| <b>seq704</b> | Firmicutes    | Clostridia   | Clostridiales | Lachnospiraceae |
| <b>seq707</b> | Firmicutes    | Clostridia   | Clostridiales | Lachnospiraceae |
| <b>seq715</b> | Firmicutes    | Clostridia   | Clostridiales | Lachnospiraceae |
| <b>seq733</b> | Firmicutes    | Clostridia   | Clostridiales | Lachnospiraceae |
| <b>seq746</b> | Firmicutes    | Clostridia   | Clostridiales | Lachnospiraceae |
| <b>seq750</b> | Firmicutes    | Clostridia   | Clostridiales | Lachnospiraceae |
| <b>seq759</b> | Firmicutes    | Clostridia   | Clostridiales | Lachnospiraceae |

Sequence Count Table

|        | <b>Phylum</b> | <b>Class</b> | <b>Genus</b> | <b>Species</b> |
|--------|---------------|--------------|--------------|----------------|
| seq559 | Firmicutes    | Clostridia   |              |                |
| seq566 | Firmicutes    | Clostridia   |              |                |
| seq568 | Firmicutes    | Clostridia   |              |                |
| seq569 | Firmicutes    | Clostridia   |              |                |
| seq574 | Firmicutes    | Clostridia   |              |                |
| seq610 | Firmicutes    | Clostridia   |              |                |
| seq615 | Firmicutes    | Clostridia   |              |                |
| seq624 | Firmicutes    | Clostridia   |              |                |
| seq627 | Firmicutes    | Clostridia   |              |                |
| seq635 | Firmicutes    | Clostridia   |              |                |
| seq640 | Firmicutes    | Clostridia   |              |                |
| seq643 | Firmicutes    | Clostridia   |              |                |
| seq654 | Firmicutes    | Clostridia   |              |                |
| seq655 | Firmicutes    | Clostridia   |              |                |
| seq656 | Firmicutes    | Clostridia   |              |                |
| seq659 | Firmicutes    | Clostridia   |              |                |
| seq662 | Firmicutes    | Clostridia   |              |                |
| seq665 | Firmicutes    | Clostridia   |              |                |
| seq678 | Firmicutes    | Clostridia   |              |                |
| seq681 | Firmicutes    | Clostridia   |              |                |
| seq682 | Firmicutes    | Clostridia   |              |                |
| seq684 | Firmicutes    | Clostridia   |              |                |
| seq689 | Firmicutes    | Clostridia   |              |                |
| seq695 | Firmicutes    | Clostridia   |              |                |
| seq696 | Firmicutes    | Clostridia   |              |                |
| seq704 | Firmicutes    | Clostridia   |              |                |
| seq707 | Firmicutes    | Clostridia   |              |                |
| seq715 | Firmicutes    | Clostridia   |              |                |
| seq733 | Firmicutes    | Clostridia   |              |                |
| seq746 | Firmicutes    | Clostridia   |              |                |
| seq750 | Firmicutes    | Clostridia   |              |                |
| seq759 | Firmicutes    | Clostridia   |              |                |

Sequence Count Table

|        | <b>Phylum</b> | <b>Class</b> | <b>Subject34WK0</b> | <b>Subject34WK12</b> | <b>Subject16WK0</b> | <b>Subject16WK12</b> |
|--------|---------------|--------------|---------------------|----------------------|---------------------|----------------------|
| seq559 | Firmicutes    | Clostridia   | 0                   | 0                    | 0                   | 0                    |
| seq566 | Firmicutes    | Clostridia   | 0                   | 0                    | 0                   | 0                    |
| seq568 | Firmicutes    | Clostridia   | 0                   | 0                    | 27                  | 0                    |
| seq569 | Firmicutes    | Clostridia   | 0                   | 0                    | 0                   | 0                    |
| seq574 | Firmicutes    | Clostridia   | 0                   | 0                    | 0                   | 0                    |
| seq610 | Firmicutes    | Clostridia   | 0                   | 0                    | 0                   | 0                    |
| seq615 | Firmicutes    | Clostridia   | 0                   | 0                    | 0                   | 4                    |
| seq624 | Firmicutes    | Clostridia   | 0                   | 0                    | 0                   | 0                    |
| seq627 | Firmicutes    | Clostridia   | 0                   | 0                    | 0                   | 0                    |
| seq635 | Firmicutes    | Clostridia   | 0                   | 0                    | 0                   | 0                    |
| seq640 | Firmicutes    | Clostridia   | 0                   | 0                    | 18                  | 17                   |
| seq643 | Firmicutes    | Clostridia   | 0                   | 0                    | 0                   | 0                    |
| seq654 | Firmicutes    | Clostridia   | 0                   | 0                    | 0                   | 0                    |
| seq655 | Firmicutes    | Clostridia   | 0                   | 0                    | 0                   | 0                    |
| seq656 | Firmicutes    | Clostridia   | 0                   | 0                    | 0                   | 0                    |
| seq659 | Firmicutes    | Clostridia   | 0                   | 0                    | 0                   | 0                    |
| seq662 | Firmicutes    | Clostridia   | 0                   | 136                  | 31                  | 0                    |
| seq665 | Firmicutes    | Clostridia   | 0                   | 0                    | 0                   | 0                    |
| seq678 | Firmicutes    | Clostridia   | 0                   | 0                    | 0                   | 0                    |
| seq681 | Firmicutes    | Clostridia   | 0                   | 0                    | 0                   | 0                    |
| seq682 | Firmicutes    | Clostridia   | 0                   | 0                    | 0                   | 0                    |
| seq684 | Firmicutes    | Clostridia   | 0                   | 0                    | 0                   | 0                    |
| seq689 | Firmicutes    | Clostridia   | 0                   | 0                    | 0                   | 0                    |
| seq695 | Firmicutes    | Clostridia   | 0                   | 0                    | 0                   | 0                    |
| seq696 | Firmicutes    | Clostridia   | 0                   | 0                    | 0                   | 0                    |
| seq704 | Firmicutes    | Clostridia   | 0                   | 0                    | 0                   | 0                    |
| seq707 | Firmicutes    | Clostridia   | 0                   | 0                    | 146                 | 224                  |
| seq715 | Firmicutes    | Clostridia   | 0                   | 0                    | 0                   | 0                    |
| seq733 | Firmicutes    | Clostridia   | 0                   | 0                    | 0                   | 0                    |
| seq746 | Firmicutes    | Clostridia   | 0                   | 0                    | 0                   | 0                    |
| seq750 | Firmicutes    | Clostridia   | 0                   | 0                    | 0                   | 0                    |
| seq759 | Firmicutes    | Clostridia   | 0                   | 0                    | 0                   | 0                    |

Sequence Count Table

|        | <b>Phylum</b> | <b>Class</b> | <b>Subject17WK0</b> | <b>Subject17WK12</b> | <b>Subject1WK0</b> | <b>Subject1WK12</b> |
|--------|---------------|--------------|---------------------|----------------------|--------------------|---------------------|
| seq559 | Firmicutes    | Clostridia   | 0                   | 0                    | 0                  | 0                   |
| seq566 | Firmicutes    | Clostridia   | 0                   | 0                    | 0                  | 0                   |
| seq568 | Firmicutes    | Clostridia   | 0                   | 0                    | 43                 | 44                  |
| seq569 | Firmicutes    | Clostridia   | 0                   | 0                    | 0                  | 0                   |
| seq574 | Firmicutes    | Clostridia   | 0                   | 0                    | 0                  | 0                   |
| seq610 | Firmicutes    | Clostridia   | 0                   | 0                    | 0                  | 0                   |
| seq615 | Firmicutes    | Clostridia   | 5                   | 0                    | 11                 | 11                  |
| seq624 | Firmicutes    | Clostridia   | 0                   | 0                    | 0                  | 0                   |
| seq627 | Firmicutes    | Clostridia   | 0                   | 0                    | 0                  | 0                   |
| seq635 | Firmicutes    | Clostridia   | 0                   | 0                    | 0                  | 0                   |
| seq640 | Firmicutes    | Clostridia   | 58                  | 42                   | 0                  | 0                   |
| seq643 | Firmicutes    | Clostridia   | 0                   | 0                    | 0                  | 0                   |
| seq654 | Firmicutes    | Clostridia   | 0                   | 0                    | 0                  | 0                   |
| seq655 | Firmicutes    | Clostridia   | 0                   | 0                    | 0                  | 0                   |
| seq656 | Firmicutes    | Clostridia   | 0                   | 0                    | 0                  | 0                   |
| seq659 | Firmicutes    | Clostridia   | 0                   | 0                    | 0                  | 0                   |
| seq662 | Firmicutes    | Clostridia   | 0                   | 0                    | 0                  | 0                   |
| seq665 | Firmicutes    | Clostridia   | 7                   | 13                   | 0                  | 0                   |
| seq678 | Firmicutes    | Clostridia   | 0                   | 0                    | 0                  | 0                   |
| seq681 | Firmicutes    | Clostridia   | 0                   | 0                    | 0                  | 0                   |
| seq682 | Firmicutes    | Clostridia   | 0                   | 0                    | 165                | 160                 |
| seq684 | Firmicutes    | Clostridia   | 0                   | 0                    | 0                  | 0                   |
| seq689 | Firmicutes    | Clostridia   | 0                   | 0                    | 0                  | 0                   |
| seq695 | Firmicutes    | Clostridia   | 0                   | 0                    | 223                | 163                 |
| seq696 | Firmicutes    | Clostridia   | 0                   | 0                    | 0                  | 0                   |
| seq704 | Firmicutes    | Clostridia   | 0                   | 0                    | 0                  | 0                   |
| seq707 | Firmicutes    | Clostridia   | 0                   | 0                    | 0                  | 0                   |
| seq715 | Firmicutes    | Clostridia   | 0                   | 0                    | 0                  | 0                   |
| seq733 | Firmicutes    | Clostridia   | 0                   | 0                    | 0                  | 0                   |
| seq746 | Firmicutes    | Clostridia   | 0                   | 0                    | 184                | 135                 |
| seq750 | Firmicutes    | Clostridia   | 0                   | 0                    | 0                  | 0                   |
| seq759 | Firmicutes    | Clostridia   | 0                   | 0                    | 0                  | 0                   |

Sequence Count Table

|        | <b>Phylum</b> | <b>Class</b> | <b>Subject2WK0</b> | <b>Subject2WK12</b> | <b>Subject3WK0</b> | <b>Subject3WK12</b> |
|--------|---------------|--------------|--------------------|---------------------|--------------------|---------------------|
| seq559 | Firmicutes    | Clostridia   | 0                  | 0                   | 0                  | 0                   |
| seq566 | Firmicutes    | Clostridia   | 0                  | 0                   | 0                  | 0                   |
| seq568 | Firmicutes    | Clostridia   | 0                  | 0                   | 0                  | 0                   |
| seq569 | Firmicutes    | Clostridia   | 0                  | 0                   | 0                  | 0                   |
| seq574 | Firmicutes    | Clostridia   | 0                  | 0                   | 0                  | 0                   |
| seq610 | Firmicutes    | Clostridia   | 0                  | 0                   | 0                  | 0                   |
| seq615 | Firmicutes    | Clostridia   | 0                  | 0                   | 33                 | 0                   |
| seq624 | Firmicutes    | Clostridia   | 0                  | 0                   | 0                  | 0                   |
| seq627 | Firmicutes    | Clostridia   | 0                  | 0                   | 0                  | 0                   |
| seq635 | Firmicutes    | Clostridia   | 0                  | 0                   | 0                  | 0                   |
| seq640 | Firmicutes    | Clostridia   | 0                  | 0                   | 0                  | 0                   |
| seq643 | Firmicutes    | Clostridia   | 0                  | 0                   | 0                  | 0                   |
| seq654 | Firmicutes    | Clostridia   | 0                  | 0                   | 0                  | 0                   |
| seq655 | Firmicutes    | Clostridia   | 0                  | 0                   | 0                  | 0                   |
| seq656 | Firmicutes    | Clostridia   | 146                | 167                 | 0                  | 0                   |
| seq659 | Firmicutes    | Clostridia   | 0                  | 0                   | 0                  | 0                   |
| seq662 | Firmicutes    | Clostridia   | 0                  | 0                   | 0                  | 28                  |
| seq665 | Firmicutes    | Clostridia   | 0                  | 0                   | 0                  | 0                   |
| seq678 | Firmicutes    | Clostridia   | 0                  | 0                   | 0                  | 0                   |
| seq681 | Firmicutes    | Clostridia   | 0                  | 0                   | 0                  | 0                   |
| seq682 | Firmicutes    | Clostridia   | 0                  | 0                   | 0                  | 0                   |
| seq684 | Firmicutes    | Clostridia   | 0                  | 0                   | 0                  | 0                   |
| seq689 | Firmicutes    | Clostridia   | 0                  | 0                   | 0                  | 0                   |
| seq695 | Firmicutes    | Clostridia   | 0                  | 0                   | 0                  | 0                   |
| seq696 | Firmicutes    | Clostridia   | 0                  | 0                   | 0                  | 0                   |
| seq704 | Firmicutes    | Clostridia   | 0                  | 0                   | 0                  | 0                   |
| seq707 | Firmicutes    | Clostridia   | 0                  | 0                   | 0                  | 0                   |
| seq715 | Firmicutes    | Clostridia   | 0                  | 0                   | 0                  | 0                   |
| seq733 | Firmicutes    | Clostridia   | 0                  | 0                   | 0                  | 0                   |
| seq746 | Firmicutes    | Clostridia   | 0                  | 0                   | 0                  | 0                   |
| seq750 | Firmicutes    | Clostridia   | 0                  | 0                   | 0                  | 0                   |
| seq759 | Firmicutes    | Clostridia   | 0                  | 0                   | 0                  | 0                   |

Sequence Count Table

|        | <b>Phylum</b> | <b>Class</b> | <b>Subject4WK0</b> | <b>Subject4WK12</b> | <b>Subject5WK0</b> | <b>Subject5WK12</b> |
|--------|---------------|--------------|--------------------|---------------------|--------------------|---------------------|
| seq559 | Firmicutes    | Clostridia   | 0                  | 0                   | 0                  | 0                   |
| seq566 | Firmicutes    | Clostridia   | 0                  | 0                   | 0                  | 0                   |
| seq568 | Firmicutes    | Clostridia   | 0                  | 0                   | 0                  | 0                   |
| seq569 | Firmicutes    | Clostridia   | 0                  | 0                   | 0                  | 0                   |
| seq574 | Firmicutes    | Clostridia   | 0                  | 0                   | 0                  | 0                   |
| seq610 | Firmicutes    | Clostridia   | 0                  | 0                   | 0                  | 26                  |
| seq615 | Firmicutes    | Clostridia   | 31                 | 10                  | 12                 | 19                  |
| seq624 | Firmicutes    | Clostridia   | 0                  | 0                   | 0                  | 0                   |
| seq627 | Firmicutes    | Clostridia   | 0                  | 0                   | 0                  | 0                   |
| seq635 | Firmicutes    | Clostridia   | 0                  | 0                   | 0                  | 0                   |
| seq640 | Firmicutes    | Clostridia   | 44                 | 60                  | 0                  | 0                   |
| seq643 | Firmicutes    | Clostridia   | 0                  | 0                   | 0                  | 0                   |
| seq654 | Firmicutes    | Clostridia   | 0                  | 72                  | 0                  | 0                   |
| seq655 | Firmicutes    | Clostridia   | 19                 | 0                   | 0                  | 0                   |
| seq656 | Firmicutes    | Clostridia   | 0                  | 0                   | 0                  | 0                   |
| seq659 | Firmicutes    | Clostridia   | 0                  | 0                   | 0                  | 0                   |
| seq662 | Firmicutes    | Clostridia   | 0                  | 0                   | 0                  | 0                   |
| seq665 | Firmicutes    | Clostridia   | 0                  | 0                   | 0                  | 0                   |
| seq678 | Firmicutes    | Clostridia   | 0                  | 0                   | 0                  | 0                   |
| seq681 | Firmicutes    | Clostridia   | 0                  | 0                   | 0                  | 0                   |
| seq682 | Firmicutes    | Clostridia   | 0                  | 0                   | 0                  | 0                   |
| seq684 | Firmicutes    | Clostridia   | 0                  | 0                   | 65                 | 22                  |
| seq689 | Firmicutes    | Clostridia   | 0                  | 0                   | 0                  | 0                   |
| seq695 | Firmicutes    | Clostridia   | 0                  | 0                   | 0                  | 0                   |
| seq696 | Firmicutes    | Clostridia   | 0                  | 0                   | 0                  | 0                   |
| seq704 | Firmicutes    | Clostridia   | 0                  | 0                   | 0                  | 0                   |
| seq707 | Firmicutes    | Clostridia   | 0                  | 0                   | 0                  | 0                   |
| seq715 | Firmicutes    | Clostridia   | 0                  | 0                   | 0                  | 0                   |
| seq733 | Firmicutes    | Clostridia   | 208                | 123                 | 0                  | 0                   |
| seq746 | Firmicutes    | Clostridia   | 0                  | 0                   | 0                  | 0                   |
| seq750 | Firmicutes    | Clostridia   | 0                  | 0                   | 171                | 145                 |
| seq759 | Firmicutes    | Clostridia   | 0                  | 0                   | 0                  | 0                   |



Sequence Count Table

|        | <b>Phylum</b> | <b>Class</b> | <b>Subject6WK0</b> | <b>Subject6WK12</b> | <b>Subject18WK0</b> | <b>Subject18WK12</b> |
|--------|---------------|--------------|--------------------|---------------------|---------------------|----------------------|
| seq559 | Firmicutes    | Clostridia   | 0                  | 0                   | 0                   | 0                    |
| seq566 | Firmicutes    | Clostridia   | 0                  | 0                   | 0                   | 0                    |
| seq568 | Firmicutes    | Clostridia   | 0                  | 51                  | 0                   | 0                    |
| seq569 | Firmicutes    | Clostridia   | 0                  | 0                   | 92                  | 69                   |
| seq574 | Firmicutes    | Clostridia   | 0                  | 0                   | 0                   | 0                    |
| seq610 | Firmicutes    | Clostridia   | 0                  | 0                   | 0                   | 0                    |
| seq615 | Firmicutes    | Clostridia   | 9                  | 0                   | 0                   | 0                    |
| seq624 | Firmicutes    | Clostridia   | 0                  | 0                   | 0                   | 0                    |
| seq627 | Firmicutes    | Clostridia   | 0                  | 0                   | 0                   | 0                    |
| seq635 | Firmicutes    | Clostridia   | 0                  | 0                   | 0                   | 0                    |
| seq640 | Firmicutes    | Clostridia   | 9                  | 26                  | 0                   | 0                    |
| seq643 | Firmicutes    | Clostridia   | 0                  | 0                   | 0                   | 0                    |
| seq654 | Firmicutes    | Clostridia   | 0                  | 0                   | 0                   | 0                    |
| seq655 | Firmicutes    | Clostridia   | 0                  | 0                   | 0                   | 0                    |
| seq656 | Firmicutes    | Clostridia   | 0                  | 0                   | 0                   | 0                    |
| seq659 | Firmicutes    | Clostridia   | 0                  | 0                   | 448                 | 0                    |
| seq662 | Firmicutes    | Clostridia   | 9                  | 83                  | 0                   | 0                    |
| seq665 | Firmicutes    | Clostridia   | 0                  | 0                   | 85                  | 55                   |
| seq678 | Firmicutes    | Clostridia   | 0                  | 0                   | 0                   | 0                    |
| seq681 | Firmicutes    | Clostridia   | 0                  | 0                   | 307                 | 99                   |
| seq682 | Firmicutes    | Clostridia   | 0                  | 0                   | 0                   | 0                    |
| seq684 | Firmicutes    | Clostridia   | 0                  | 0                   | 0                   | 0                    |
| seq689 | Firmicutes    | Clostridia   | 0                  | 0                   | 0                   | 0                    |
| seq695 | Firmicutes    | Clostridia   | 0                  | 0                   | 0                   | 0                    |
| seq696 | Firmicutes    | Clostridia   | 0                  | 0                   | 0                   | 0                    |
| seq704 | Firmicutes    | Clostridia   | 0                  | 0                   | 0                   | 0                    |
| seq707 | Firmicutes    | Clostridia   | 0                  | 0                   | 0                   | 0                    |
| seq715 | Firmicutes    | Clostridia   | 0                  | 0                   | 0                   | 0                    |
| seq733 | Firmicutes    | Clostridia   | 0                  | 0                   | 0                   | 0                    |
| seq746 | Firmicutes    | Clostridia   | 0                  | 0                   | 0                   | 0                    |
| seq750 | Firmicutes    | Clostridia   | 0                  | 0                   | 0                   | 0                    |
| seq759 | Firmicutes    | Clostridia   | 27                 | 83                  | 0                   | 0                    |

Sequence Count Table

|               | <b>Phylum</b> | <b>Class</b> | <b>Subject19WK0</b> | <b>Subject19WK12</b> | <b>Subject20WK0</b> | <b>Subject20WK12</b> |
|---------------|---------------|--------------|---------------------|----------------------|---------------------|----------------------|
| <b>seq559</b> | Firmicutes    | Clostridia   | 0                   | 0                    | 0                   | 0                    |
| <b>seq566</b> | Firmicutes    | Clostridia   | 0                   | 0                    | 0                   | 0                    |
| <b>seq568</b> | Firmicutes    | Clostridia   | 0                   | 0                    | 45                  | 36                   |
| <b>seq569</b> | Firmicutes    | Clostridia   | 0                   | 0                    | 0                   | 0                    |
| <b>seq574</b> | Firmicutes    | Clostridia   | 333                 | 261                  | 0                   | 0                    |
| <b>seq610</b> | Firmicutes    | Clostridia   | 0                   | 0                    | 0                   | 0                    |
| <b>seq615</b> | Firmicutes    | Clostridia   | 0                   | 0                    | 0                   | 0                    |
| <b>seq624</b> | Firmicutes    | Clostridia   | 0                   | 0                    | 0                   | 0                    |
| <b>seq627</b> | Firmicutes    | Clostridia   | 0                   | 0                    | 0                   | 0                    |
| <b>seq635</b> | Firmicutes    | Clostridia   | 0                   | 0                    | 0                   | 0                    |
| <b>seq640</b> | Firmicutes    | Clostridia   | 0                   | 0                    | 11                  | 81                   |
| <b>seq643</b> | Firmicutes    | Clostridia   | 0                   | 0                    | 0                   | 0                    |
| <b>seq654</b> | Firmicutes    | Clostridia   | 0                   | 0                    | 0                   | 0                    |
| <b>seq655</b> | Firmicutes    | Clostridia   | 0                   | 0                    | 0                   | 0                    |
| <b>seq656</b> | Firmicutes    | Clostridia   | 0                   | 0                    | 0                   | 0                    |
| <b>seq659</b> | Firmicutes    | Clostridia   | 0                   | 0                    | 0                   | 0                    |
| <b>seq662</b> | Firmicutes    | Clostridia   | 0                   | 0                    | 14                  | 113                  |
| <b>seq665</b> | Firmicutes    | Clostridia   | 0                   | 0                    | 0                   | 0                    |
| <b>seq678</b> | Firmicutes    | Clostridia   | 243                 | 164                  | 0                   | 0                    |
| <b>seq681</b> | Firmicutes    | Clostridia   | 0                   | 0                    | 0                   | 0                    |
| <b>seq682</b> | Firmicutes    | Clostridia   | 0                   | 0                    | 0                   | 0                    |
| <b>seq684</b> | Firmicutes    | Clostridia   | 0                   | 0                    | 0                   | 0                    |
| <b>seq689</b> | Firmicutes    | Clostridia   | 0                   | 0                    | 0                   | 0                    |
| <b>seq695</b> | Firmicutes    | Clostridia   | 0                   | 0                    | 0                   | 0                    |
| <b>seq696</b> | Firmicutes    | Clostridia   | 0                   | 0                    | 0                   | 0                    |
| <b>seq704</b> | Firmicutes    | Clostridia   | 0                   | 189                  | 0                   | 0                    |
| <b>seq707</b> | Firmicutes    | Clostridia   | 0                   | 0                    | 0                   | 0                    |
| <b>seq715</b> | Firmicutes    | Clostridia   | 0                   | 0                    | 0                   | 0                    |
| <b>seq733</b> | Firmicutes    | Clostridia   | 0                   | 0                    | 0                   | 0                    |
| <b>seq746</b> | Firmicutes    | Clostridia   | 0                   | 0                    | 0                   | 0                    |
| <b>seq750</b> | Firmicutes    | Clostridia   | 0                   | 0                    | 0                   | 0                    |
| <b>seq759</b> | Firmicutes    | Clostridia   | 0                   | 0                    | 0                   | 0                    |

Sequence Count Table

|        | <b>Phylum</b> | <b>Class</b> | <b>Subject7WK0</b> | <b>Subject7WK12</b> | <b>Subject21WK0</b> | <b>Subject21WK12</b> |
|--------|---------------|--------------|--------------------|---------------------|---------------------|----------------------|
| seq559 | Firmicutes    | Clostridia   | 0                  | 0                   | 0                   | 0                    |
| seq566 | Firmicutes    | Clostridia   | 0                  | 0                   | 0                   | 0                    |
| seq568 | Firmicutes    | Clostridia   | 28                 | 0                   | 0                   | 0                    |
| seq569 | Firmicutes    | Clostridia   | 0                  | 0                   | 0                   | 0                    |
| seq574 | Firmicutes    | Clostridia   | 0                  | 0                   | 0                   | 0                    |
| seq610 | Firmicutes    | Clostridia   | 0                  | 0                   | 0                   | 0                    |
| seq615 | Firmicutes    | Clostridia   | 22                 | 15                  | 20                  | 46                   |
| seq624 | Firmicutes    | Clostridia   | 0                  | 0                   | 0                   | 0                    |
| seq627 | Firmicutes    | Clostridia   | 0                  | 0                   | 0                   | 0                    |
| seq635 | Firmicutes    | Clostridia   | 0                  | 0                   | 0                   | 0                    |
| seq640 | Firmicutes    | Clostridia   | 0                  | 0                   | 0                   | 0                    |
| seq643 | Firmicutes    | Clostridia   | 0                  | 0                   | 0                   | 0                    |
| seq654 | Firmicutes    | Clostridia   | 0                  | 70                  | 0                   | 0                    |
| seq655 | Firmicutes    | Clostridia   | 8                  | 0                   | 0                   | 0                    |
| seq656 | Firmicutes    | Clostridia   | 0                  | 0                   | 0                   | 0                    |
| seq659 | Firmicutes    | Clostridia   | 0                  | 0                   | 0                   | 0                    |
| seq662 | Firmicutes    | Clostridia   | 0                  | 0                   | 0                   | 0                    |
| seq665 | Firmicutes    | Clostridia   | 0                  | 0                   | 0                   | 0                    |
| seq678 | Firmicutes    | Clostridia   | 0                  | 0                   | 0                   | 0                    |
| seq681 | Firmicutes    | Clostridia   | 0                  | 0                   | 0                   | 0                    |
| seq682 | Firmicutes    | Clostridia   | 0                  | 0                   | 0                   | 0                    |
| seq684 | Firmicutes    | Clostridia   | 30                 | 0                   | 0                   | 0                    |
| seq689 | Firmicutes    | Clostridia   | 0                  | 0                   | 0                   | 0                    |
| seq695 | Firmicutes    | Clostridia   | 0                  | 0                   | 0                   | 0                    |
| seq696 | Firmicutes    | Clostridia   | 0                  | 0                   | 0                   | 0                    |
| seq704 | Firmicutes    | Clostridia   | 0                  | 0                   | 0                   | 0                    |
| seq707 | Firmicutes    | Clostridia   | 0                  | 0                   | 0                   | 0                    |
| seq715 | Firmicutes    | Clostridia   | 0                  | 0                   | 0                   | 0                    |
| seq733 | Firmicutes    | Clostridia   | 0                  | 0                   | 0                   | 0                    |
| seq746 | Firmicutes    | Clostridia   | 0                  | 0                   | 0                   | 0                    |
| seq750 | Firmicutes    | Clostridia   | 0                  | 0                   | 0                   | 0                    |
| seq759 | Firmicutes    | Clostridia   | 0                  | 0                   | 0                   | 0                    |

Sequence Count Table

|               | <b>Phylum</b> | <b>Class</b> | <b>Subject8WK0</b> | <b>Subject8WK12</b> | <b>Subject9WK0</b> | <b>Subject9WK12</b> |
|---------------|---------------|--------------|--------------------|---------------------|--------------------|---------------------|
| <b>seq559</b> | Firmicutes    | Clostridia   | 498                | 0                   | 0                  | 0                   |
| <b>seq566</b> | Firmicutes    | Clostridia   | 0                  | 0                   | 0                  | 0                   |
| <b>seq568</b> | Firmicutes    | Clostridia   | 56                 | 83                  | 0                  | 0                   |
| <b>seq569</b> | Firmicutes    | Clostridia   | 0                  | 0                   | 65                 | 71                  |
| <b>seq574</b> | Firmicutes    | Clostridia   | 0                  | 0                   | 0                  | 0                   |
| <b>seq610</b> | Firmicutes    | Clostridia   | 0                  | 0                   | 0                  | 0                   |
| <b>seq615</b> | Firmicutes    | Clostridia   | 25                 | 21                  | 9                  | 0                   |
| <b>seq624</b> | Firmicutes    | Clostridia   | 0                  | 0                   | 0                  | 0                   |
| <b>seq627</b> | Firmicutes    | Clostridia   | 0                  | 0                   | 0                  | 0                   |
| <b>seq635</b> | Firmicutes    | Clostridia   | 0                  | 0                   | 0                  | 0                   |
| <b>seq640</b> | Firmicutes    | Clostridia   | 0                  | 0                   | 0                  | 0                   |
| <b>seq643</b> | Firmicutes    | Clostridia   | 0                  | 0                   | 0                  | 0                   |
| <b>seq654</b> | Firmicutes    | Clostridia   | 0                  | 0                   | 0                  | 0                   |
| <b>seq655</b> | Firmicutes    | Clostridia   | 0                  | 0                   | 0                  | 0                   |
| <b>seq656</b> | Firmicutes    | Clostridia   | 0                  | 0                   | 0                  | 0                   |
| <b>seq659</b> | Firmicutes    | Clostridia   | 0                  | 0                   | 0                  | 0                   |
| <b>seq662</b> | Firmicutes    | Clostridia   | 0                  | 0                   | 0                  | 0                   |
| <b>seq665</b> | Firmicutes    | Clostridia   | 0                  | 14                  | 0                  | 0                   |
| <b>seq678</b> | Firmicutes    | Clostridia   | 0                  | 0                   | 0                  | 0                   |
| <b>seq681</b> | Firmicutes    | Clostridia   | 0                  | 0                   | 0                  | 0                   |
| <b>seq682</b> | Firmicutes    | Clostridia   | 0                  | 0                   | 80                 | 0                   |
| <b>seq684</b> | Firmicutes    | Clostridia   | 0                  | 0                   | 0                  | 0                   |
| <b>seq689</b> | Firmicutes    | Clostridia   | 0                  | 0                   | 0                  | 0                   |
| <b>seq695</b> | Firmicutes    | Clostridia   | 0                  | 0                   | 0                  | 0                   |
| <b>seq696</b> | Firmicutes    | Clostridia   | 0                  | 0                   | 0                  | 0                   |
| <b>seq704</b> | Firmicutes    | Clostridia   | 0                  | 0                   | 0                  | 0                   |
| <b>seq707</b> | Firmicutes    | Clostridia   | 0                  | 0                   | 0                  | 0                   |
| <b>seq715</b> | Firmicutes    | Clostridia   | 0                  | 0                   | 349                | 6                   |
| <b>seq733</b> | Firmicutes    | Clostridia   | 0                  | 0                   | 0                  | 0                   |
| <b>seq746</b> | Firmicutes    | Clostridia   | 0                  | 0                   | 0                  | 0                   |
| <b>seq750</b> | Firmicutes    | Clostridia   | 0                  | 0                   | 0                  | 0                   |
| <b>seq759</b> | Firmicutes    | Clostridia   | 0                  | 0                   | 0                  | 0                   |

Sequence Count Table

|        | <b>Phylum</b> | <b>Class</b> | <b>Subject10WK0</b> | <b>Subject10WK12</b> | <b>Subject22WK0</b> | <b>Subject22WK12</b> |
|--------|---------------|--------------|---------------------|----------------------|---------------------|----------------------|
| seq559 | Firmicutes    | Clostridia   | 0                   | 0                    | 0                   | 0                    |
| seq566 | Firmicutes    | Clostridia   | 0                   | 0                    | 0                   | 0                    |
| seq568 | Firmicutes    | Clostridia   | 0                   | 0                    | 0                   | 0                    |
| seq569 | Firmicutes    | Clostridia   | 0                   | 0                    | 0                   | 0                    |
| seq574 | Firmicutes    | Clostridia   | 0                   | 0                    | 0                   | 0                    |
| seq610 | Firmicutes    | Clostridia   | 306                 | 186                  | 0                   | 0                    |
| seq615 | Firmicutes    | Clostridia   | 27                  | 0                    | 16                  | 15                   |
| seq624 | Firmicutes    | Clostridia   | 0                   | 0                    | 0                   | 0                    |
| seq627 | Firmicutes    | Clostridia   | 0                   | 0                    | 0                   | 0                    |
| seq635 | Firmicutes    | Clostridia   | 0                   | 0                    | 0                   | 0                    |
| seq640 | Firmicutes    | Clostridia   | 0                   | 0                    | 0                   | 0                    |
| seq643 | Firmicutes    | Clostridia   | 0                   | 0                    | 0                   | 0                    |
| seq654 | Firmicutes    | Clostridia   | 0                   | 0                    | 0                   | 0                    |
| seq655 | Firmicutes    | Clostridia   | 0                   | 0                    | 0                   | 0                    |
| seq656 | Firmicutes    | Clostridia   | 0                   | 0                    | 0                   | 0                    |
| seq659 | Firmicutes    | Clostridia   | 0                   | 0                    | 0                   | 0                    |
| seq662 | Firmicutes    | Clostridia   | 0                   | 0                    | 0                   | 0                    |
| seq665 | Firmicutes    | Clostridia   | 0                   | 0                    | 0                   | 0                    |
| seq678 | Firmicutes    | Clostridia   | 0                   | 0                    | 0                   | 0                    |
| seq681 | Firmicutes    | Clostridia   | 0                   | 0                    | 0                   | 0                    |
| seq682 | Firmicutes    | Clostridia   | 0                   | 0                    | 0                   | 0                    |
| seq684 | Firmicutes    | Clostridia   | 0                   | 0                    | 0                   | 0                    |
| seq689 | Firmicutes    | Clostridia   | 0                   | 0                    | 0                   | 0                    |
| seq695 | Firmicutes    | Clostridia   | 0                   | 0                    | 0                   | 0                    |
| seq696 | Firmicutes    | Clostridia   | 0                   | 0                    | 0                   | 0                    |
| seq704 | Firmicutes    | Clostridia   | 0                   | 0                    | 0                   | 0                    |
| seq707 | Firmicutes    | Clostridia   | 0                   | 0                    | 0                   | 0                    |
| seq715 | Firmicutes    | Clostridia   | 0                   | 0                    | 0                   | 0                    |
| seq733 | Firmicutes    | Clostridia   | 0                   | 0                    | 0                   | 0                    |
| seq746 | Firmicutes    | Clostridia   | 0                   | 0                    | 0                   | 0                    |
| seq750 | Firmicutes    | Clostridia   | 0                   | 0                    | 0                   | 0                    |
| seq759 | Firmicutes    | Clostridia   | 0                   | 0                    | 0                   | 0                    |

Sequence Count Table

|               | <b>Phylum</b> | <b>Class</b> | <b>Subject23WK0</b> | <b>Subject23WK12</b> | <b>Subject24WK0</b> | <b>Subject24WK12</b> |
|---------------|---------------|--------------|---------------------|----------------------|---------------------|----------------------|
| <b>seq559</b> | Firmicutes    | Clostridia   | 0                   | 0                    | 48                  | 45                   |
| <b>seq566</b> | Firmicutes    | Clostridia   | 0                   | 0                    | 250                 | 363                  |
| <b>seq568</b> | Firmicutes    | Clostridia   | 0                   | 0                    | 42                  | 26                   |
| <b>seq569</b> | Firmicutes    | Clostridia   | 116                 | 98                   | 0                   | 0                    |
| <b>seq574</b> | Firmicutes    | Clostridia   | 0                   | 0                    | 0                   | 0                    |
| <b>seq610</b> | Firmicutes    | Clostridia   | 0                   | 0                    | 0                   | 0                    |
| <b>seq615</b> | Firmicutes    | Clostridia   | 0                   | 14                   | 8                   | 8                    |
| <b>seq624</b> | Firmicutes    | Clostridia   | 314                 | 185                  | 0                   | 0                    |
| <b>seq627</b> | Firmicutes    | Clostridia   | 0                   | 0                    | 0                   | 0                    |
| <b>seq635</b> | Firmicutes    | Clostridia   | 0                   | 0                    | 0                   | 0                    |
| <b>seq640</b> | Firmicutes    | Clostridia   | 11                  | 23                   | 0                   | 0                    |
| <b>seq643</b> | Firmicutes    | Clostridia   | 0                   | 0                    | 0                   | 0                    |
| <b>seq654</b> | Firmicutes    | Clostridia   | 0                   | 0                    | 78                  | 0                    |
| <b>seq655</b> | Firmicutes    | Clostridia   | 0                   | 0                    | 0                   | 0                    |
| <b>seq656</b> | Firmicutes    | Clostridia   | 0                   | 0                    | 0                   | 0                    |
| <b>seq659</b> | Firmicutes    | Clostridia   | 0                   | 0                    | 0                   | 0                    |
| <b>seq662</b> | Firmicutes    | Clostridia   | 0                   | 0                    | 0                   | 0                    |
| <b>seq665</b> | Firmicutes    | Clostridia   | 0                   | 0                    | 0                   | 0                    |
| <b>seq678</b> | Firmicutes    | Clostridia   | 0                   | 0                    | 0                   | 0                    |
| <b>seq681</b> | Firmicutes    | Clostridia   | 0                   | 0                    | 0                   | 0                    |
| <b>seq682</b> | Firmicutes    | Clostridia   | 0                   | 0                    | 0                   | 0                    |
| <b>seq684</b> | Firmicutes    | Clostridia   | 0                   | 0                    | 0                   | 0                    |
| <b>seq689</b> | Firmicutes    | Clostridia   | 0                   | 0                    | 141                 | 255                  |
| <b>seq695</b> | Firmicutes    | Clostridia   | 0                   | 0                    | 0                   | 0                    |
| <b>seq696</b> | Firmicutes    | Clostridia   | 165                 | 221                  | 0                   | 0                    |
| <b>seq704</b> | Firmicutes    | Clostridia   | 0                   | 0                    | 0                   | 0                    |
| <b>seq707</b> | Firmicutes    | Clostridia   | 0                   | 0                    | 0                   | 0                    |
| <b>seq715</b> | Firmicutes    | Clostridia   | 0                   | 0                    | 0                   | 0                    |
| <b>seq733</b> | Firmicutes    | Clostridia   | 0                   | 0                    | 0                   | 0                    |
| <b>seq746</b> | Firmicutes    | Clostridia   | 0                   | 0                    | 0                   | 0                    |
| <b>seq750</b> | Firmicutes    | Clostridia   | 0                   | 0                    | 0                   | 0                    |
| <b>seq759</b> | Firmicutes    | Clostridia   | 64                  | 65                   | 0                   | 0                    |

Sequence Count Table

|        | <b>Phylum</b> | <b>Class</b> | <b>Subject11WK0</b> | <b>Subject11WK12</b> | <b>Subject12WK0</b> | <b>Subject12WK12</b> |
|--------|---------------|--------------|---------------------|----------------------|---------------------|----------------------|
| seq559 | Firmicutes    | Clostridia   | 0                   | 0                    | 0                   | 0                    |
| seq566 | Firmicutes    | Clostridia   | 0                   | 0                    | 0                   | 0                    |
| seq568 | Firmicutes    | Clostridia   | 0                   | 0                    | 26                  | 0                    |
| seq569 | Firmicutes    | Clostridia   | 0                   | 0                    | 0                   | 0                    |
| seq574 | Firmicutes    | Clostridia   | 0                   | 0                    | 0                   | 0                    |
| seq610 | Firmicutes    | Clostridia   | 0                   | 0                    | 0                   | 0                    |
| seq615 | Firmicutes    | Clostridia   | 24                  | 0                    | 0                   | 0                    |
| seq624 | Firmicutes    | Clostridia   | 0                   | 0                    | 0                   | 0                    |
| seq627 | Firmicutes    | Clostridia   | 0                   | 0                    | 0                   | 0                    |
| seq635 | Firmicutes    | Clostridia   | 0                   | 0                    | 0                   | 0                    |
| seq640 | Firmicutes    | Clostridia   | 0                   | 0                    | 31                  | 0                    |
| seq643 | Firmicutes    | Clostridia   | 0                   | 0                    | 0                   | 0                    |
| seq654 | Firmicutes    | Clostridia   | 0                   | 0                    | 0                   | 0                    |
| seq655 | Firmicutes    | Clostridia   | 0                   | 0                    | 0                   | 0                    |
| seq656 | Firmicutes    | Clostridia   | 0                   | 0                    | 0                   | 0                    |
| seq659 | Firmicutes    | Clostridia   | 0                   | 0                    | 0                   | 0                    |
| seq662 | Firmicutes    | Clostridia   | 0                   | 0                    | 0                   | 0                    |
| seq665 | Firmicutes    | Clostridia   | 0                   | 0                    | 0                   | 0                    |
| seq678 | Firmicutes    | Clostridia   | 0                   | 0                    | 0                   | 0                    |
| seq681 | Firmicutes    | Clostridia   | 0                   | 0                    | 0                   | 0                    |
| seq682 | Firmicutes    | Clostridia   | 0                   | 0                    | 0                   | 0                    |
| seq684 | Firmicutes    | Clostridia   | 0                   | 0                    | 0                   | 0                    |
| seq689 | Firmicutes    | Clostridia   | 0                   | 0                    | 0                   | 0                    |
| seq695 | Firmicutes    | Clostridia   | 0                   | 0                    | 0                   | 0                    |
| seq696 | Firmicutes    | Clostridia   | 0                   | 0                    | 0                   | 0                    |
| seq704 | Firmicutes    | Clostridia   | 0                   | 0                    | 0                   | 0                    |
| seq707 | Firmicutes    | Clostridia   | 0                   | 0                    | 0                   | 0                    |
| seq715 | Firmicutes    | Clostridia   | 0                   | 0                    | 0                   | 0                    |
| seq733 | Firmicutes    | Clostridia   | 0                   | 0                    | 0                   | 0                    |
| seq746 | Firmicutes    | Clostridia   | 0                   | 0                    | 0                   | 0                    |
| seq750 | Firmicutes    | Clostridia   | 0                   | 0                    | 0                   | 0                    |
| seq759 | Firmicutes    | Clostridia   | 0                   | 0                    | 0                   | 0                    |

Sequence Count Table

|        | <b>Phylum</b> | <b>Class</b> | <b>Subject25WK0</b> | <b>Subject25WK12</b> | <b>Subject38WK0</b> | <b>Subject38WK12</b> |
|--------|---------------|--------------|---------------------|----------------------|---------------------|----------------------|
| seq559 | Firmicutes    | Clostridia   | 0                   | 0                    | 0                   | 0                    |
| seq566 | Firmicutes    | Clostridia   | 0                   | 0                    | 0                   | 0                    |
| seq568 | Firmicutes    | Clostridia   | 39                  | 0                    | 0                   | 0                    |
| seq569 | Firmicutes    | Clostridia   | 0                   | 0                    | 0                   | 0                    |
| seq574 | Firmicutes    | Clostridia   | 0                   | 0                    | 0                   | 0                    |
| seq610 | Firmicutes    | Clostridia   | 0                   | 0                    | 0                   | 0                    |
| seq615 | Firmicutes    | Clostridia   | 10                  | 0                    | 0                   | 0                    |
| seq624 | Firmicutes    | Clostridia   | 0                   | 0                    | 0                   | 0                    |
| seq627 | Firmicutes    | Clostridia   | 0                   | 0                    | 0                   | 0                    |
| seq635 | Firmicutes    | Clostridia   | 0                   | 0                    | 0                   | 0                    |
| seq640 | Firmicutes    | Clostridia   | 18                  | 0                    | 0                   | 0                    |
| seq643 | Firmicutes    | Clostridia   | 0                   | 0                    | 0                   | 0                    |
| seq654 | Firmicutes    | Clostridia   | 0                   | 0                    | 0                   | 0                    |
| seq655 | Firmicutes    | Clostridia   | 0                   | 0                    | 0                   | 0                    |
| seq656 | Firmicutes    | Clostridia   | 0                   | 0                    | 0                   | 0                    |
| seq659 | Firmicutes    | Clostridia   | 0                   | 0                    | 0                   | 0                    |
| seq662 | Firmicutes    | Clostridia   | 0                   | 0                    | 0                   | 0                    |
| seq665 | Firmicutes    | Clostridia   | 0                   | 0                    | 0                   | 0                    |
| seq678 | Firmicutes    | Clostridia   | 0                   | 0                    | 0                   | 0                    |
| seq681 | Firmicutes    | Clostridia   | 0                   | 0                    | 0                   | 0                    |
| seq682 | Firmicutes    | Clostridia   | 0                   | 0                    | 0                   | 0                    |
| seq684 | Firmicutes    | Clostridia   | 209                 | 0                    | 0                   | 0                    |
| seq689 | Firmicutes    | Clostridia   | 0                   | 0                    | 0                   | 0                    |
| seq695 | Firmicutes    | Clostridia   | 0                   | 0                    | 0                   | 0                    |
| seq696 | Firmicutes    | Clostridia   | 0                   | 0                    | 0                   | 0                    |
| seq704 | Firmicutes    | Clostridia   | 0                   | 0                    | 0                   | 0                    |
| seq707 | Firmicutes    | Clostridia   | 0                   | 0                    | 0                   | 0                    |
| seq715 | Firmicutes    | Clostridia   | 0                   | 0                    | 0                   | 0                    |
| seq733 | Firmicutes    | Clostridia   | 0                   | 0                    | 0                   | 0                    |
| seq746 | Firmicutes    | Clostridia   | 0                   | 0                    | 0                   | 0                    |
| seq750 | Firmicutes    | Clostridia   | 0                   | 0                    | 0                   | 0                    |
| seq759 | Firmicutes    | Clostridia   | 0                   | 0                    | 0                   | 0                    |



Sequence Count Table

|        | <b>Phylum</b> | <b>Class</b> | <b>Subject31WK0</b> | <b>Subject31WK12</b> | <b>Subject32WK0</b> | <b>Subject32WK12</b> |
|--------|---------------|--------------|---------------------|----------------------|---------------------|----------------------|
| seq559 | Firmicutes    | Clostridia   | 0                   | 0                    | 0                   | 0                    |
| seq566 | Firmicutes    | Clostridia   | 0                   | 0                    | 0                   | 0                    |
| seq568 | Firmicutes    | Clostridia   | 0                   | 0                    | 0                   | 0                    |
| seq569 | Firmicutes    | Clostridia   | 0                   | 0                    | 0                   | 0                    |
| seq574 | Firmicutes    | Clostridia   | 0                   | 0                    | 0                   | 0                    |
| seq610 | Firmicutes    | Clostridia   | 0                   | 0                    | 0                   | 0                    |
| seq615 | Firmicutes    | Clostridia   | 0                   | 0                    | 0                   | 0                    |
| seq624 | Firmicutes    | Clostridia   | 0                   | 0                    | 0                   | 0                    |
| seq627 | Firmicutes    | Clostridia   | 0                   | 0                    | 0                   | 0                    |
| seq635 | Firmicutes    | Clostridia   | 0                   | 0                    | 0                   | 0                    |
| seq640 | Firmicutes    | Clostridia   | 0                   | 0                    | 0                   | 0                    |
| seq643 | Firmicutes    | Clostridia   | 0                   | 0                    | 0                   | 0                    |
| seq654 | Firmicutes    | Clostridia   | 0                   | 0                    | 0                   | 0                    |
| seq655 | Firmicutes    | Clostridia   | 0                   | 0                    | 0                   | 0                    |
| seq656 | Firmicutes    | Clostridia   | 0                   | 0                    | 137                 | 0                    |
| seq659 | Firmicutes    | Clostridia   | 0                   | 0                    | 0                   | 0                    |
| seq662 | Firmicutes    | Clostridia   | 0                   | 0                    | 0                   | 0                    |
| seq665 | Firmicutes    | Clostridia   | 0                   | 0                    | 0                   | 0                    |
| seq678 | Firmicutes    | Clostridia   | 0                   | 0                    | 0                   | 0                    |
| seq681 | Firmicutes    | Clostridia   | 0                   | 0                    | 0                   | 0                    |
| seq682 | Firmicutes    | Clostridia   | 0                   | 0                    | 0                   | 0                    |
| seq684 | Firmicutes    | Clostridia   | 0                   | 0                    | 0                   | 0                    |
| seq689 | Firmicutes    | Clostridia   | 0                   | 0                    | 0                   | 0                    |
| seq695 | Firmicutes    | Clostridia   | 0                   | 0                    | 0                   | 0                    |
| seq696 | Firmicutes    | Clostridia   | 0                   | 0                    | 0                   | 0                    |
| seq704 | Firmicutes    | Clostridia   | 0                   | 0                    | 113                 | 0                    |
| seq707 | Firmicutes    | Clostridia   | 0                   | 0                    | 0                   | 0                    |
| seq715 | Firmicutes    | Clostridia   | 0                   | 0                    | 0                   | 0                    |
| seq733 | Firmicutes    | Clostridia   | 0                   | 0                    | 0                   | 0                    |
| seq746 | Firmicutes    | Clostridia   | 0                   | 0                    | 0                   | 0                    |
| seq750 | Firmicutes    | Clostridia   | 0                   | 0                    | 0                   | 0                    |
| seq759 | Firmicutes    | Clostridia   | 0                   | 0                    | 0                   | 0                    |

Sequence Count Table

|        | <b>Phylum</b> | <b>Class</b> | <b>Subject13WK0</b> | <b>Subject13WK12</b> | <b>Subject39WK0</b> | <b>Subject39WK12</b> |
|--------|---------------|--------------|---------------------|----------------------|---------------------|----------------------|
| seq559 | Firmicutes    | Clostridia   | 0                   | 0                    | 0                   | 0                    |
| seq566 | Firmicutes    | Clostridia   | 0                   | 0                    | 0                   | 0                    |
| seq568 | Firmicutes    | Clostridia   | 0                   | 0                    | 0                   | 29                   |
| seq569 | Firmicutes    | Clostridia   | 0                   | 0                    | 0                   | 0                    |
| seq574 | Firmicutes    | Clostridia   | 0                   | 0                    | 0                   | 0                    |
| seq610 | Firmicutes    | Clostridia   | 0                   | 0                    | 0                   | 0                    |
| seq615 | Firmicutes    | Clostridia   | 0                   | 11                   | 0                   | 0                    |
| seq624 | Firmicutes    | Clostridia   | 0                   | 0                    | 0                   | 0                    |
| seq627 | Firmicutes    | Clostridia   | 0                   | 0                    | 0                   | 496                  |
| seq635 | Firmicutes    | Clostridia   | 0                   | 0                    | 0                   | 0                    |
| seq640 | Firmicutes    | Clostridia   | 0                   | 0                    | 0                   | 0                    |
| seq643 | Firmicutes    | Clostridia   | 452                 | 23                   | 0                   | 0                    |
| seq654 | Firmicutes    | Clostridia   | 0                   | 0                    | 0                   | 0                    |
| seq655 | Firmicutes    | Clostridia   | 29                  | 30                   | 0                   | 0                    |
| seq656 | Firmicutes    | Clostridia   | 0                   | 0                    | 0                   | 0                    |
| seq659 | Firmicutes    | Clostridia   | 0                   | 0                    | 0                   | 0                    |
| seq662 | Firmicutes    | Clostridia   | 0                   | 0                    | 0                   | 0                    |
| seq665 | Firmicutes    | Clostridia   | 59                  | 28                   | 0                   | 0                    |
| seq678 | Firmicutes    | Clostridia   | 0                   | 0                    | 0                   | 0                    |
| seq681 | Firmicutes    | Clostridia   | 0                   | 0                    | 0                   | 0                    |
| seq682 | Firmicutes    | Clostridia   | 0                   | 0                    | 0                   | 0                    |
| seq684 | Firmicutes    | Clostridia   | 74                  | 0                    | 0                   | 0                    |
| seq689 | Firmicutes    | Clostridia   | 0                   | 0                    | 0                   | 0                    |
| seq695 | Firmicutes    | Clostridia   | 0                   | 0                    | 0                   | 0                    |
| seq696 | Firmicutes    | Clostridia   | 0                   | 0                    | 0                   | 0                    |
| seq704 | Firmicutes    | Clostridia   | 0                   | 0                    | 0                   | 73                   |
| seq707 | Firmicutes    | Clostridia   | 0                   | 0                    | 0                   | 0                    |
| seq715 | Firmicutes    | Clostridia   | 0                   | 0                    | 0                   | 0                    |
| seq733 | Firmicutes    | Clostridia   | 0                   | 0                    | 0                   | 0                    |
| seq746 | Firmicutes    | Clostridia   | 0                   | 0                    | 0                   | 0                    |
| seq750 | Firmicutes    | Clostridia   | 0                   | 0                    | 0                   | 0                    |
| seq759 | Firmicutes    | Clostridia   | 0                   | 0                    | 0                   | 0                    |

Sequence Count Table

|        | <b>Phylum</b> | <b>Class</b> | <b>Subject26WK0</b> | <b>Subject26WK12</b> | <b>Subject14WK0</b> | <b>Subject14WK12</b> |
|--------|---------------|--------------|---------------------|----------------------|---------------------|----------------------|
| seq559 | Firmicutes    | Clostridia   | 0                   | 0                    | 0                   | 0                    |
| seq566 | Firmicutes    | Clostridia   | 0                   | 0                    | 0                   | 0                    |
| seq568 | Firmicutes    | Clostridia   | 0                   | 0                    | 0                   | 0                    |
| seq569 | Firmicutes    | Clostridia   | 0                   | 0                    | 93                  | 0                    |
| seq574 | Firmicutes    | Clostridia   | 0                   | 0                    | 0                   | 0                    |
| seq610 | Firmicutes    | Clostridia   | 0                   | 0                    | 0                   | 0                    |
| seq615 | Firmicutes    | Clostridia   | 43                  | 15                   | 0                   | 11                   |
| seq624 | Firmicutes    | Clostridia   | 0                   | 0                    | 0                   | 0                    |
| seq627 | Firmicutes    | Clostridia   | 0                   | 0                    | 0                   | 0                    |
| seq635 | Firmicutes    | Clostridia   | 380                 | 111                  | 0                   | 0                    |
| seq640 | Firmicutes    | Clostridia   | 0                   | 0                    | 16                  | 15                   |
| seq643 | Firmicutes    | Clostridia   | 0                   | 0                    | 0                   | 0                    |
| seq654 | Firmicutes    | Clostridia   | 63                  | 99                   | 70                  | 0                    |
| seq655 | Firmicutes    | Clostridia   | 213                 | 68                   | 0                   | 0                    |
| seq656 | Firmicutes    | Clostridia   | 0                   | 0                    | 0                   | 0                    |
| seq659 | Firmicutes    | Clostridia   | 0                   | 0                    | 0                   | 0                    |
| seq662 | Firmicutes    | Clostridia   | 0                   | 0                    | 0                   | 0                    |
| seq665 | Firmicutes    | Clostridia   | 0                   | 0                    | 0                   | 0                    |
| seq678 | Firmicutes    | Clostridia   | 0                   | 0                    | 0                   | 0                    |
| seq681 | Firmicutes    | Clostridia   | 0                   | 0                    | 0                   | 0                    |
| seq682 | Firmicutes    | Clostridia   | 0                   | 0                    | 0                   | 0                    |
| seq684 | Firmicutes    | Clostridia   | 0                   | 0                    | 0                   | 0                    |
| seq689 | Firmicutes    | Clostridia   | 0                   | 0                    | 0                   | 0                    |
| seq695 | Firmicutes    | Clostridia   | 0                   | 0                    | 0                   | 0                    |
| seq696 | Firmicutes    | Clostridia   | 0                   | 0                    | 0                   | 0                    |
| seq704 | Firmicutes    | Clostridia   | 0                   | 0                    | 0                   | 0                    |
| seq707 | Firmicutes    | Clostridia   | 0                   | 0                    | 0                   | 0                    |
| seq715 | Firmicutes    | Clostridia   | 0                   | 0                    | 0                   | 0                    |
| seq733 | Firmicutes    | Clostridia   | 0                   | 0                    | 0                   | 0                    |
| seq746 | Firmicutes    | Clostridia   | 0                   | 0                    | 0                   | 0                    |
| seq750 | Firmicutes    | Clostridia   | 0                   | 0                    | 0                   | 0                    |
| seq759 | Firmicutes    | Clostridia   | 0                   | 0                    | 0                   | 0                    |

Sequence Count Table

|               | <b>Phylum</b> | <b>Class</b> | <b>Subject27WK0</b> | <b>Subject27WK12</b> | <b>Subject15WK0</b> | <b>Subject15WK12</b> |
|---------------|---------------|--------------|---------------------|----------------------|---------------------|----------------------|
| <b>seq559</b> | Firmicutes    | Clostridia   | 31                  | 0                    | 0                   | 0                    |
| <b>seq566</b> | Firmicutes    | Clostridia   | 0                   | 0                    | 0                   | 0                    |
| <b>seq568</b> | Firmicutes    | Clostridia   | 0                   | 32                   | 0                   | 0                    |
| <b>seq569</b> | Firmicutes    | Clostridia   | 0                   | 0                    | 0                   | 0                    |
| <b>seq574</b> | Firmicutes    | Clostridia   | 0                   | 0                    | 0                   | 0                    |
| <b>seq610</b> | Firmicutes    | Clostridia   | 0                   | 0                    | 0                   | 0                    |
| <b>seq615</b> | Firmicutes    | Clostridia   | 0                   | 0                    | 0                   | 0                    |
| <b>seq624</b> | Firmicutes    | Clostridia   | 0                   | 0                    | 0                   | 0                    |
| <b>seq627</b> | Firmicutes    | Clostridia   | 0                   | 0                    | 0                   | 0                    |
| <b>seq635</b> | Firmicutes    | Clostridia   | 0                   | 0                    | 0                   | 0                    |
| <b>seq640</b> | Firmicutes    | Clostridia   | 0                   | 0                    | 0                   | 0                    |
| <b>seq643</b> | Firmicutes    | Clostridia   | 0                   | 0                    | 0                   | 0                    |
| <b>seq654</b> | Firmicutes    | Clostridia   | 0                   | 0                    | 0                   | 0                    |
| <b>seq655</b> | Firmicutes    | Clostridia   | 0                   | 0                    | 34                  | 50                   |
| <b>seq656</b> | Firmicutes    | Clostridia   | 0                   | 0                    | 0                   | 0                    |
| <b>seq659</b> | Firmicutes    | Clostridia   | 0                   | 0                    | 0                   | 0                    |
| <b>seq662</b> | Firmicutes    | Clostridia   | 23                  | 8                    | 0                   | 0                    |
| <b>seq665</b> | Firmicutes    | Clostridia   | 93                  | 81                   | 0                   | 0                    |
| <b>seq678</b> | Firmicutes    | Clostridia   | 0                   | 0                    | 0                   | 0                    |
| <b>seq681</b> | Firmicutes    | Clostridia   | 0                   | 0                    | 0                   | 0                    |
| <b>seq682</b> | Firmicutes    | Clostridia   | 0                   | 0                    | 0                   | 0                    |
| <b>seq684</b> | Firmicutes    | Clostridia   | 0                   | 0                    | 0                   | 0                    |
| <b>seq689</b> | Firmicutes    | Clostridia   | 0                   | 0                    | 0                   | 0                    |
| <b>seq695</b> | Firmicutes    | Clostridia   | 0                   | 0                    | 0                   | 0                    |
| <b>seq696</b> | Firmicutes    | Clostridia   | 0                   | 0                    | 0                   | 0                    |
| <b>seq704</b> | Firmicutes    | Clostridia   | 0                   | 0                    | 0                   | 0                    |
| <b>seq707</b> | Firmicutes    | Clostridia   | 0                   | 0                    | 0                   | 0                    |
| <b>seq715</b> | Firmicutes    | Clostridia   | 0                   | 0                    | 0                   | 0                    |
| <b>seq733</b> | Firmicutes    | Clostridia   | 0                   | 0                    | 0                   | 0                    |
| <b>seq746</b> | Firmicutes    | Clostridia   | 0                   | 0                    | 0                   | 0                    |
| <b>seq750</b> | Firmicutes    | Clostridia   | 0                   | 0                    | 0                   | 0                    |
| <b>seq759</b> | Firmicutes    | Clostridia   | 0                   | 0                    | 30                  | 38                   |

Sequence Count Table

|               | <b>Phylum</b> | <b>Class</b> | <b>Δ</b> |  |  |  |
|---------------|---------------|--------------|----------|--|--|--|
| <b>seq559</b> | Firmicutes    | Clostridia   |          |  |  |  |
| <b>seq566</b> | Firmicutes    | Clostridia   |          |  |  |  |
| <b>seq568</b> | Firmicutes    | Clostridia   |          |  |  |  |
| <b>seq569</b> | Firmicutes    | Clostridia   |          |  |  |  |
| <b>seq574</b> | Firmicutes    | Clostridia   |          |  |  |  |
| <b>seq610</b> | Firmicutes    | Clostridia   |          |  |  |  |
| <b>seq615</b> | Firmicutes    | Clostridia   |          |  |  |  |
| <b>seq624</b> | Firmicutes    | Clostridia   |          |  |  |  |
| <b>seq627</b> | Firmicutes    | Clostridia   |          |  |  |  |
| <b>seq635</b> | Firmicutes    | Clostridia   |          |  |  |  |
| <b>seq640</b> | Firmicutes    | Clostridia   |          |  |  |  |
| <b>seq643</b> | Firmicutes    | Clostridia   |          |  |  |  |
| <b>seq654</b> | Firmicutes    | Clostridia   |          |  |  |  |
| <b>seq655</b> | Firmicutes    | Clostridia   |          |  |  |  |
| <b>seq656</b> | Firmicutes    | Clostridia   |          |  |  |  |
| <b>seq659</b> | Firmicutes    | Clostridia   |          |  |  |  |
| <b>seq662</b> | Firmicutes    | Clostridia   |          |  |  |  |
| <b>seq665</b> | Firmicutes    | Clostridia   |          |  |  |  |
| <b>seq678</b> | Firmicutes    | Clostridia   |          |  |  |  |
| <b>seq681</b> | Firmicutes    | Clostridia   |          |  |  |  |
| <b>seq682</b> | Firmicutes    | Clostridia   |          |  |  |  |
| <b>seq684</b> | Firmicutes    | Clostridia   |          |  |  |  |
| <b>seq689</b> | Firmicutes    | Clostridia   |          |  |  |  |
| <b>seq695</b> | Firmicutes    | Clostridia   |          |  |  |  |
| <b>seq696</b> | Firmicutes    | Clostridia   |          |  |  |  |
| <b>seq704</b> | Firmicutes    | Clostridia   |          |  |  |  |
| <b>seq707</b> | Firmicutes    | Clostridia   |          |  |  |  |
| <b>seq715</b> | Firmicutes    | Clostridia   |          |  |  |  |
| <b>seq733</b> | Firmicutes    | Clostridia   |          |  |  |  |
| <b>seq746</b> | Firmicutes    | Clostridia   |          |  |  |  |
| <b>seq750</b> | Firmicutes    | Clostridia   |          |  |  |  |
| <b>seq759</b> | Firmicutes    | Clostridia   |          |  |  |  |

Sequence Count Table

|               | <b>Phylum</b> | <b>Class</b> | <b>Order</b>  | <b>Family</b>   |
|---------------|---------------|--------------|---------------|-----------------|
| <b>seq763</b> | Firmicutes    | Clostridia   | Clostridiales | Lachnospiraceae |
| <b>seq772</b> | Firmicutes    | Clostridia   | Clostridiales | Lachnospiraceae |
| <b>seq778</b> | Firmicutes    | Clostridia   | Clostridiales | Lachnospiraceae |
| <b>seq782</b> | Firmicutes    | Clostridia   | Clostridiales | Lachnospiraceae |
| <b>seq784</b> | Firmicutes    | Clostridia   | Clostridiales | Lachnospiraceae |
| <b>seq785</b> | Firmicutes    | Clostridia   | Clostridiales | Lachnospiraceae |
| <b>seq786</b> | Firmicutes    | Clostridia   | Clostridiales | Lachnospiraceae |
| <b>seq787</b> | Firmicutes    | Clostridia   | Clostridiales | Lachnospiraceae |
| <b>seq790</b> | Firmicutes    | Clostridia   | Clostridiales | Lachnospiraceae |
| <b>seq796</b> | Firmicutes    | Clostridia   | Clostridiales | Lachnospiraceae |
| <b>seq797</b> | Firmicutes    | Clostridia   | Clostridiales | Lachnospiraceae |
| <b>seq804</b> | Firmicutes    | Clostridia   | Clostridiales | Lachnospiraceae |
| <b>seq811</b> | Firmicutes    | Clostridia   | Clostridiales | Lachnospiraceae |
| <b>seq818</b> | Firmicutes    | Clostridia   | Clostridiales | Lachnospiraceae |
| <b>seq824</b> | Firmicutes    | Clostridia   | Clostridiales | Lachnospiraceae |
| <b>seq825</b> | Firmicutes    | Clostridia   | Clostridiales | Lachnospiraceae |
| <b>seq834</b> | Firmicutes    | Clostridia   | Clostridiales | Lachnospiraceae |
| <b>seq840</b> | Firmicutes    | Clostridia   | Clostridiales | Lachnospiraceae |
| <b>seq844</b> | Firmicutes    | Clostridia   | Clostridiales | Lachnospiraceae |
| <b>seq848</b> | Firmicutes    | Clostridia   | Clostridiales | Lachnospiraceae |
| <b>seq854</b> | Firmicutes    | Clostridia   | Clostridiales | Lachnospiraceae |
| <b>seq855</b> | Firmicutes    | Clostridia   | Clostridiales | Lachnospiraceae |
| <b>seq856</b> | Firmicutes    | Clostridia   | Clostridiales | Lachnospiraceae |
| <b>seq860</b> | Firmicutes    | Clostridia   | Clostridiales | Lachnospiraceae |
| <b>seq864</b> | Firmicutes    | Clostridia   | Clostridiales | Lachnospiraceae |
| <b>seq867</b> | Firmicutes    | Clostridia   | Clostridiales | Lachnospiraceae |
| <b>seq875</b> | Firmicutes    | Clostridia   | Clostridiales | Lachnospiraceae |
| <b>seq876</b> | Firmicutes    | Clostridia   | Clostridiales | Lachnospiraceae |
| <b>seq878</b> | Firmicutes    | Clostridia   | Clostridiales | Lachnospiraceae |
| <b>seq879</b> | Firmicutes    | Clostridia   | Clostridiales | Lachnospiraceae |
| <b>seq883</b> | Firmicutes    | Clostridia   | Clostridiales | Lachnospiraceae |
| <b>seq886</b> | Firmicutes    | Clostridia   | Clostridiales | Lachnospiraceae |

Sequence Count Table

|               | <b>Phylum</b> | <b>Class</b> | <b>Genus</b> | <b>Species</b> |
|---------------|---------------|--------------|--------------|----------------|
| <b>seq763</b> | Firmicutes    | Clostridia   |              |                |
| <b>seq772</b> | Firmicutes    | Clostridia   |              |                |
| <b>seq778</b> | Firmicutes    | Clostridia   |              |                |
| <b>seq782</b> | Firmicutes    | Clostridia   |              |                |
| <b>seq784</b> | Firmicutes    | Clostridia   |              |                |
| <b>seq785</b> | Firmicutes    | Clostridia   |              |                |
| <b>seq786</b> | Firmicutes    | Clostridia   |              |                |
| <b>seq787</b> | Firmicutes    | Clostridia   |              |                |
| <b>seq790</b> | Firmicutes    | Clostridia   |              |                |
| <b>seq796</b> | Firmicutes    | Clostridia   |              |                |
| <b>seq797</b> | Firmicutes    | Clostridia   |              |                |
| <b>seq804</b> | Firmicutes    | Clostridia   |              |                |
| <b>seq811</b> | Firmicutes    | Clostridia   |              |                |
| <b>seq818</b> | Firmicutes    | Clostridia   |              |                |
| <b>seq824</b> | Firmicutes    | Clostridia   |              |                |
| <b>seq825</b> | Firmicutes    | Clostridia   |              |                |
| <b>seq834</b> | Firmicutes    | Clostridia   |              |                |
| <b>seq840</b> | Firmicutes    | Clostridia   |              |                |
| <b>seq844</b> | Firmicutes    | Clostridia   |              |                |
| <b>seq848</b> | Firmicutes    | Clostridia   |              |                |
| <b>seq854</b> | Firmicutes    | Clostridia   |              |                |
| <b>seq855</b> | Firmicutes    | Clostridia   |              |                |
| <b>seq856</b> | Firmicutes    | Clostridia   |              |                |
| <b>seq860</b> | Firmicutes    | Clostridia   |              |                |
| <b>seq864</b> | Firmicutes    | Clostridia   |              |                |
| <b>seq867</b> | Firmicutes    | Clostridia   |              |                |
| <b>seq875</b> | Firmicutes    | Clostridia   |              |                |
| <b>seq876</b> | Firmicutes    | Clostridia   |              |                |
| <b>seq878</b> | Firmicutes    | Clostridia   |              |                |
| <b>seq879</b> | Firmicutes    | Clostridia   |              |                |
| <b>seq883</b> | Firmicutes    | Clostridia   |              |                |
| <b>seq886</b> | Firmicutes    | Clostridia   |              |                |

Sequence Count Table

|        | <b>Phylum</b> | <b>Class</b> | <b>Subject34WK0</b> | <b>Subject34WK12</b> | <b>Subject16WK0</b> | <b>Subject16WK12</b> |
|--------|---------------|--------------|---------------------|----------------------|---------------------|----------------------|
| seq763 | Firmicutes    | Clostridia   | 0                   | 0                    | 0                   | 0                    |
| seq772 | Firmicutes    | Clostridia   | 0                   | 0                    | 0                   | 0                    |
| seq778 | Firmicutes    | Clostridia   | 0                   | 0                    | 0                   | 0                    |
| seq782 | Firmicutes    | Clostridia   | 0                   | 0                    | 0                   | 0                    |
| seq784 | Firmicutes    | Clostridia   | 0                   | 0                    | 0                   | 0                    |
| seq785 | Firmicutes    | Clostridia   | 0                   | 0                    | 0                   | 0                    |
| seq786 | Firmicutes    | Clostridia   | 0                   | 0                    | 0                   | 0                    |
| seq787 | Firmicutes    | Clostridia   | 0                   | 0                    | 0                   | 0                    |
| seq790 | Firmicutes    | Clostridia   | 0                   | 0                    | 0                   | 0                    |
| seq796 | Firmicutes    | Clostridia   | 0                   | 0                    | 0                   | 0                    |
| seq797 | Firmicutes    | Clostridia   | 0                   | 0                    | 0                   | 0                    |
| seq804 | Firmicutes    | Clostridia   | 0                   | 0                    | 0                   | 0                    |
| seq811 | Firmicutes    | Clostridia   | 0                   | 0                    | 0                   | 0                    |
| seq818 | Firmicutes    | Clostridia   | 0                   | 0                    | 0                   | 0                    |
| seq824 | Firmicutes    | Clostridia   | 0                   | 0                    | 0                   | 0                    |
| seq825 | Firmicutes    | Clostridia   | 0                   | 0                    | 0                   | 10                   |
| seq834 | Firmicutes    | Clostridia   | 0                   | 0                    | 0                   | 0                    |
| seq840 | Firmicutes    | Clostridia   | 0                   | 0                    | 0                   | 0                    |
| seq844 | Firmicutes    | Clostridia   | 0                   | 6                    | 0                   | 0                    |
| seq848 | Firmicutes    | Clostridia   | 0                   | 0                    | 0                   | 0                    |
| seq854 | Firmicutes    | Clostridia   | 0                   | 0                    | 12                  | 8                    |
| seq855 | Firmicutes    | Clostridia   | 0                   | 0                    | 0                   | 0                    |
| seq856 | Firmicutes    | Clostridia   | 0                   | 0                    | 0                   | 0                    |
| seq860 | Firmicutes    | Clostridia   | 0                   | 0                    | 0                   | 0                    |
| seq864 | Firmicutes    | Clostridia   | 0                   | 0                    | 0                   | 0                    |
| seq867 | Firmicutes    | Clostridia   | 0                   | 0                    | 7                   | 24                   |
| seq875 | Firmicutes    | Clostridia   | 0                   | 0                    | 0                   | 0                    |
| seq876 | Firmicutes    | Clostridia   | 0                   | 0                    | 0                   | 0                    |
| seq878 | Firmicutes    | Clostridia   | 0                   | 0                    | 0                   | 0                    |
| seq879 | Firmicutes    | Clostridia   | 0                   | 0                    | 0                   | 0                    |
| seq883 | Firmicutes    | Clostridia   | 0                   | 0                    | 0                   | 0                    |
| seq886 | Firmicutes    | Clostridia   | 0                   | 0                    | 0                   | 0                    |



Sequence Count Table

|        | <b>Phylum</b> | <b>Class</b> | <b>Subject17WK0</b> | <b>Subject17WK12</b> | <b>Subject1WK0</b> | <b>Subject1WK12</b> |
|--------|---------------|--------------|---------------------|----------------------|--------------------|---------------------|
| seq763 | Firmicutes    | Clostridia   | 0                   | 0                    | 0                  | 0                   |
| seq772 | Firmicutes    | Clostridia   | 0                   | 0                    | 0                  | 0                   |
| seq778 | Firmicutes    | Clostridia   | 0                   | 0                    | 0                  | 0                   |
| seq782 | Firmicutes    | Clostridia   | 0                   | 0                    | 0                  | 79                  |
| seq784 | Firmicutes    | Clostridia   | 0                   | 0                    | 0                  | 0                   |
| seq785 | Firmicutes    | Clostridia   | 0                   | 0                    | 0                  | 0                   |
| seq786 | Firmicutes    | Clostridia   | 0                   | 0                    | 0                  | 0                   |
| seq787 | Firmicutes    | Clostridia   | 0                   | 0                    | 0                  | 0                   |
| seq790 | Firmicutes    | Clostridia   | 0                   | 0                    | 0                  | 0                   |
| seq796 | Firmicutes    | Clostridia   | 0                   | 0                    | 0                  | 0                   |
| seq797 | Firmicutes    | Clostridia   | 0                   | 0                    | 0                  | 0                   |
| seq804 | Firmicutes    | Clostridia   | 0                   | 0                    | 0                  | 0                   |
| seq811 | Firmicutes    | Clostridia   | 0                   | 0                    | 0                  | 0                   |
| seq818 | Firmicutes    | Clostridia   | 0                   | 0                    | 0                  | 0                   |
| seq824 | Firmicutes    | Clostridia   | 0                   | 0                    | 0                  | 0                   |
| seq825 | Firmicutes    | Clostridia   | 0                   | 0                    | 0                  | 0                   |
| seq834 | Firmicutes    | Clostridia   | 0                   | 0                    | 0                  | 0                   |
| seq840 | Firmicutes    | Clostridia   | 0                   | 0                    | 0                  | 0                   |
| seq844 | Firmicutes    | Clostridia   | 0                   | 0                    | 14                 | 8                   |
| seq848 | Firmicutes    | Clostridia   | 0                   | 0                    | 0                  | 0                   |
| seq854 | Firmicutes    | Clostridia   | 29                  | 12                   | 0                  | 0                   |
| seq855 | Firmicutes    | Clostridia   | 0                   | 0                    | 0                  | 11                  |
| seq856 | Firmicutes    | Clostridia   | 0                   | 0                    | 0                  | 0                   |
| seq860 | Firmicutes    | Clostridia   | 0                   | 0                    | 0                  | 0                   |
| seq864 | Firmicutes    | Clostridia   | 0                   | 0                    | 0                  | 0                   |
| seq867 | Firmicutes    | Clostridia   | 0                   | 0                    | 0                  | 0                   |
| seq875 | Firmicutes    | Clostridia   | 0                   | 0                    | 0                  | 0                   |
| seq876 | Firmicutes    | Clostridia   | 0                   | 0                    | 89                 | 76                  |
| seq878 | Firmicutes    | Clostridia   | 0                   | 0                    | 0                  | 0                   |
| seq879 | Firmicutes    | Clostridia   | 0                   | 0                    | 0                  | 0                   |
| seq883 | Firmicutes    | Clostridia   | 0                   | 0                    | 0                  | 0                   |
| seq886 | Firmicutes    | Clostridia   | 0                   | 0                    | 0                  | 0                   |

Sequence Count Table

|        | <b>Phylum</b> | <b>Class</b> | <b>Subject2WK0</b> | <b>Subject2WK12</b> | <b>Subject3WK0</b> | <b>Subject3WK12</b> |
|--------|---------------|--------------|--------------------|---------------------|--------------------|---------------------|
| seq763 | Firmicutes    | Clostridia   | 0                  | 0                   | 0                  | 0                   |
| seq772 | Firmicutes    | Clostridia   | 0                  | 0                   | 0                  | 0                   |
| seq778 | Firmicutes    | Clostridia   | 0                  | 0                   | 0                  | 0                   |
| seq782 | Firmicutes    | Clostridia   | 0                  | 0                   | 0                  | 0                   |
| seq784 | Firmicutes    | Clostridia   | 0                  | 0                   | 0                  | 0                   |
| seq785 | Firmicutes    | Clostridia   | 164                | 119                 | 0                  | 0                   |
| seq786 | Firmicutes    | Clostridia   | 0                  | 0                   | 0                  | 0                   |
| seq787 | Firmicutes    | Clostridia   | 0                  | 0                   | 0                  | 0                   |
| seq790 | Firmicutes    | Clostridia   | 0                  | 0                   | 0                  | 0                   |
| seq796 | Firmicutes    | Clostridia   | 0                  | 0                   | 0                  | 0                   |
| seq797 | Firmicutes    | Clostridia   | 0                  | 0                   | 0                  | 0                   |
| seq804 | Firmicutes    | Clostridia   | 0                  | 0                   | 0                  | 0                   |
| seq811 | Firmicutes    | Clostridia   | 0                  | 0                   | 0                  | 0                   |
| seq818 | Firmicutes    | Clostridia   | 0                  | 0                   | 0                  | 0                   |
| seq824 | Firmicutes    | Clostridia   | 0                  | 0                   | 0                  | 0                   |
| seq825 | Firmicutes    | Clostridia   | 0                  | 0                   | 0                  | 0                   |
| seq834 | Firmicutes    | Clostridia   | 0                  | 0                   | 0                  | 0                   |
| seq840 | Firmicutes    | Clostridia   | 0                  | 0                   | 0                  | 0                   |
| seq844 | Firmicutes    | Clostridia   | 8                  | 0                   | 0                  | 0                   |
| seq848 | Firmicutes    | Clostridia   | 0                  | 0                   | 0                  | 0                   |
| seq854 | Firmicutes    | Clostridia   | 0                  | 0                   | 0                  | 0                   |
| seq855 | Firmicutes    | Clostridia   | 0                  | 0                   | 42                 | 0                   |
| seq856 | Firmicutes    | Clostridia   | 0                  | 0                   | 0                  | 0                   |
| seq860 | Firmicutes    | Clostridia   | 0                  | 0                   | 0                  | 0                   |
| seq864 | Firmicutes    | Clostridia   | 0                  | 0                   | 0                  | 0                   |
| seq867 | Firmicutes    | Clostridia   | 0                  | 0                   | 0                  | 0                   |
| seq875 | Firmicutes    | Clostridia   | 0                  | 0                   | 0                  | 0                   |
| seq876 | Firmicutes    | Clostridia   | 0                  | 0                   | 0                  | 0                   |
| seq878 | Firmicutes    | Clostridia   | 0                  | 0                   | 0                  | 0                   |
| seq879 | Firmicutes    | Clostridia   | 0                  | 0                   | 0                  | 0                   |
| seq883 | Firmicutes    | Clostridia   | 0                  | 0                   | 0                  | 0                   |
| seq886 | Firmicutes    | Clostridia   | 22                 | 35                  | 0                  | 0                   |

Sequence Count Table

|               | <b>Phylum</b> | <b>Class</b> | <b>Subject4WK0</b> | <b>Subject4WK12</b> | <b>Subject5WK0</b> | <b>Subject5WK12</b> |
|---------------|---------------|--------------|--------------------|---------------------|--------------------|---------------------|
| <b>seq763</b> | Firmicutes    | Clostridia   | 0                  | 0                   | 0                  | 0                   |
| <b>seq772</b> | Firmicutes    | Clostridia   | 0                  | 0                   | 0                  | 0                   |
| <b>seq778</b> | Firmicutes    | Clostridia   | 0                  | 0                   | 117                | 171                 |
| <b>seq782</b> | Firmicutes    | Clostridia   | 0                  | 0                   | 0                  | 0                   |
| <b>seq784</b> | Firmicutes    | Clostridia   | 0                  | 0                   | 27                 | 21                  |
| <b>seq785</b> | Firmicutes    | Clostridia   | 0                  | 0                   | 0                  | 0                   |
| <b>seq786</b> | Firmicutes    | Clostridia   | 0                  | 0                   | 0                  | 0                   |
| <b>seq787</b> | Firmicutes    | Clostridia   | 0                  | 0                   | 0                  | 0                   |
| <b>seq790</b> | Firmicutes    | Clostridia   | 0                  | 0                   | 0                  | 0                   |
| <b>seq796</b> | Firmicutes    | Clostridia   | 0                  | 0                   | 0                  | 0                   |
| <b>seq797</b> | Firmicutes    | Clostridia   | 0                  | 0                   | 145                | 128                 |
| <b>seq804</b> | Firmicutes    | Clostridia   | 0                  | 268                 | 0                  | 0                   |
| <b>seq811</b> | Firmicutes    | Clostridia   | 0                  | 0                   | 0                  | 0                   |
| <b>seq818</b> | Firmicutes    | Clostridia   | 0                  | 0                   | 0                  | 0                   |
| <b>seq824</b> | Firmicutes    | Clostridia   | 0                  | 0                   | 0                  | 0                   |
| <b>seq825</b> | Firmicutes    | Clostridia   | 0                  | 27                  | 0                  | 5                   |
| <b>seq834</b> | Firmicutes    | Clostridia   | 0                  | 0                   | 0                  | 0                   |
| <b>seq840</b> | Firmicutes    | Clostridia   | 15                 | 11                  | 0                  | 0                   |
| <b>seq844</b> | Firmicutes    | Clostridia   | 0                  | 0                   | 0                  | 0                   |
| <b>seq848</b> | Firmicutes    | Clostridia   | 0                  | 0                   | 0                  | 0                   |
| <b>seq854</b> | Firmicutes    | Clostridia   | 17                 | 24                  | 0                  | 0                   |
| <b>seq855</b> | Firmicutes    | Clostridia   | 26                 | 0                   | 0                  | 15                  |
| <b>seq856</b> | Firmicutes    | Clostridia   | 0                  | 0                   | 0                  | 0                   |
| <b>seq860</b> | Firmicutes    | Clostridia   | 109                | 0                   | 0                  | 0                   |
| <b>seq864</b> | Firmicutes    | Clostridia   | 0                  | 0                   | 0                  | 0                   |
| <b>seq867</b> | Firmicutes    | Clostridia   | 0                  | 13                  | 0                  | 0                   |
| <b>seq875</b> | Firmicutes    | Clostridia   | 0                  | 0                   | 0                  | 0                   |
| <b>seq876</b> | Firmicutes    | Clostridia   | 0                  | 45                  | 0                  | 0                   |
| <b>seq878</b> | Firmicutes    | Clostridia   | 0                  | 0                   | 0                  | 0                   |
| <b>seq879</b> | Firmicutes    | Clostridia   | 0                  | 0                   | 0                  | 0                   |
| <b>seq883</b> | Firmicutes    | Clostridia   | 0                  | 0                   | 0                  | 0                   |
| <b>seq886</b> | Firmicutes    | Clostridia   | 0                  | 0                   | 63                 | 57                  |

Sequence Count Table

|        | <b>Phylum</b> | <b>Class</b> | <b>Subject6WK0</b> | <b>Subject6WK12</b> | <b>Subject18WK0</b> | <b>Subject18WK12</b> |
|--------|---------------|--------------|--------------------|---------------------|---------------------|----------------------|
| seq763 | Firmicutes    | Clostridia   | 0                  | 0                   | 0                   | 0                    |
| seq772 | Firmicutes    | Clostridia   | 0                  | 0                   | 0                   | 0                    |
| seq778 | Firmicutes    | Clostridia   | 0                  | 0                   | 0                   | 0                    |
| seq782 | Firmicutes    | Clostridia   | 0                  | 0                   | 0                   | 0                    |
| seq784 | Firmicutes    | Clostridia   | 0                  | 0                   | 0                   | 0                    |
| seq785 | Firmicutes    | Clostridia   | 0                  | 0                   | 0                   | 0                    |
| seq786 | Firmicutes    | Clostridia   | 0                  | 0                   | 0                   | 0                    |
| seq787 | Firmicutes    | Clostridia   | 0                  | 0                   | 0                   | 0                    |
| seq790 | Firmicutes    | Clostridia   | 0                  | 0                   | 0                   | 0                    |
| seq796 | Firmicutes    | Clostridia   | 0                  | 0                   | 0                   | 0                    |
| seq797 | Firmicutes    | Clostridia   | 0                  | 0                   | 0                   | 0                    |
| seq804 | Firmicutes    | Clostridia   | 0                  | 0                   | 0                   | 0                    |
| seq811 | Firmicutes    | Clostridia   | 0                  | 0                   | 0                   | 0                    |
| seq818 | Firmicutes    | Clostridia   | 0                  | 0                   | 0                   | 0                    |
| seq824 | Firmicutes    | Clostridia   | 0                  | 0                   | 0                   | 0                    |
| seq825 | Firmicutes    | Clostridia   | 0                  | 0                   | 0                   | 0                    |
| seq834 | Firmicutes    | Clostridia   | 130                | 109                 | 0                   | 0                    |
| seq840 | Firmicutes    | Clostridia   | 0                  | 0                   | 0                   | 0                    |
| seq844 | Firmicutes    | Clostridia   | 0                  | 0                   | 21                  | 25                   |
| seq848 | Firmicutes    | Clostridia   | 0                  | 0                   | 0                   | 0                    |
| seq854 | Firmicutes    | Clostridia   | 0                  | 0                   | 0                   | 0                    |
| seq855 | Firmicutes    | Clostridia   | 0                  | 0                   | 12                  | 0                    |
| seq856 | Firmicutes    | Clostridia   | 0                  | 0                   | 0                   | 0                    |
| seq860 | Firmicutes    | Clostridia   | 0                  | 0                   | 0                   | 0                    |
| seq864 | Firmicutes    | Clostridia   | 0                  | 0                   | 0                   | 0                    |
| seq867 | Firmicutes    | Clostridia   | 16                 | 25                  | 0                   | 0                    |
| seq875 | Firmicutes    | Clostridia   | 0                  | 0                   | 0                   | 0                    |
| seq876 | Firmicutes    | Clostridia   | 0                  | 0                   | 0                   | 0                    |
| seq878 | Firmicutes    | Clostridia   | 0                  | 0                   | 0                   | 0                    |
| seq879 | Firmicutes    | Clostridia   | 0                  | 0                   | 0                   | 0                    |
| seq883 | Firmicutes    | Clostridia   | 0                  | 0                   | 0                   | 0                    |
| seq886 | Firmicutes    | Clostridia   | 0                  | 0                   | 0                   | 0                    |

Sequence Count Table

|               | <b>Phylum</b> | <b>Class</b> | <b>Subject19WK0</b> | <b>Subject19WK12</b> | <b>Subject20WK0</b> | <b>Subject20WK12</b> |
|---------------|---------------|--------------|---------------------|----------------------|---------------------|----------------------|
| <b>seq763</b> | Firmicutes    | Clostridia   | 0                   | 0                    | 0                   | 0                    |
| <b>seq772</b> | Firmicutes    | Clostridia   | 0                   | 0                    | 0                   | 0                    |
| <b>seq778</b> | Firmicutes    | Clostridia   | 0                   | 0                    | 0                   | 0                    |
| <b>seq782</b> | Firmicutes    | Clostridia   | 0                   | 0                    | 0                   | 0                    |
| <b>seq784</b> | Firmicutes    | Clostridia   | 0                   | 0                    | 0                   | 0                    |
| <b>seq785</b> | Firmicutes    | Clostridia   | 0                   | 0                    | 0                   | 0                    |
| <b>seq786</b> | Firmicutes    | Clostridia   | 0                   | 0                    | 30                  | 0                    |
| <b>seq787</b> | Firmicutes    | Clostridia   | 0                   | 0                    | 0                   | 0                    |
| <b>seq790</b> | Firmicutes    | Clostridia   | 0                   | 0                    | 0                   | 0                    |
| <b>seq796</b> | Firmicutes    | Clostridia   | 0                   | 0                    | 0                   | 0                    |
| <b>seq797</b> | Firmicutes    | Clostridia   | 0                   | 0                    | 0                   | 0                    |
| <b>seq804</b> | Firmicutes    | Clostridia   | 0                   | 0                    | 0                   | 0                    |
| <b>seq811</b> | Firmicutes    | Clostridia   | 0                   | 0                    | 0                   | 0                    |
| <b>seq818</b> | Firmicutes    | Clostridia   | 0                   | 0                    | 0                   | 0                    |
| <b>seq824</b> | Firmicutes    | Clostridia   | 0                   | 0                    | 0                   | 0                    |
| <b>seq825</b> | Firmicutes    | Clostridia   | 8                   | 14                   | 0                   | 0                    |
| <b>seq834</b> | Firmicutes    | Clostridia   | 0                   | 0                    | 0                   | 0                    |
| <b>seq840</b> | Firmicutes    | Clostridia   | 0                   | 0                    | 0                   | 0                    |
| <b>seq844</b> | Firmicutes    | Clostridia   | 0                   | 0                    | 0                   | 0                    |
| <b>seq848</b> | Firmicutes    | Clostridia   | 0                   | 0                    | 30                  | 197                  |
| <b>seq854</b> | Firmicutes    | Clostridia   | 0                   | 0                    | 0                   | 11                   |
| <b>seq855</b> | Firmicutes    | Clostridia   | 11                  | 0                    | 0                   | 0                    |
| <b>seq856</b> | Firmicutes    | Clostridia   | 0                   | 0                    | 0                   | 0                    |
| <b>seq860</b> | Firmicutes    | Clostridia   | 0                   | 0                    | 0                   | 0                    |
| <b>seq864</b> | Firmicutes    | Clostridia   | 0                   | 0                    | 0                   | 0                    |
| <b>seq867</b> | Firmicutes    | Clostridia   | 10                  | 0                    | 18                  | 0                    |
| <b>seq875</b> | Firmicutes    | Clostridia   | 0                   | 0                    | 0                   | 0                    |
| <b>seq876</b> | Firmicutes    | Clostridia   | 0                   | 0                    | 0                   | 0                    |
| <b>seq878</b> | Firmicutes    | Clostridia   | 0                   | 0                    | 0                   | 0                    |
| <b>seq879</b> | Firmicutes    | Clostridia   | 0                   | 0                    | 0                   | 0                    |
| <b>seq883</b> | Firmicutes    | Clostridia   | 0                   | 0                    | 0                   | 0                    |
| <b>seq886</b> | Firmicutes    | Clostridia   | 0                   | 0                    | 0                   | 0                    |

Sequence Count Table

|               | <b>Phylum</b> | <b>Class</b> | <b>Subject7WK0</b> | <b>Subject7WK12</b> | <b>Subject21WK0</b> | <b>Subject21WK12</b> |
|---------------|---------------|--------------|--------------------|---------------------|---------------------|----------------------|
| <b>seq763</b> | Firmicutes    | Clostridia   | 0                  | 0                   | 0                   | 0                    |
| <b>seq772</b> | Firmicutes    | Clostridia   | 0                  | 0                   | 0                   | 0                    |
| <b>seq778</b> | Firmicutes    | Clostridia   | 0                  | 0                   | 0                   | 0                    |
| <b>seq782</b> | Firmicutes    | Clostridia   | 0                  | 0                   | 0                   | 0                    |
| <b>seq784</b> | Firmicutes    | Clostridia   | 20                 | 62                  | 0                   | 0                    |
| <b>seq785</b> | Firmicutes    | Clostridia   | 0                  | 0                   | 0                   | 0                    |
| <b>seq786</b> | Firmicutes    | Clostridia   | 0                  | 0                   | 0                   | 0                    |
| <b>seq787</b> | Firmicutes    | Clostridia   | 185                | 98                  | 0                   | 0                    |
| <b>seq790</b> | Firmicutes    | Clostridia   | 0                  | 0                   | 0                   | 0                    |
| <b>seq796</b> | Firmicutes    | Clostridia   | 0                  | 0                   | 0                   | 0                    |
| <b>seq797</b> | Firmicutes    | Clostridia   | 0                  | 0                   | 0                   | 0                    |
| <b>seq804</b> | Firmicutes    | Clostridia   | 0                  | 0                   | 0                   | 0                    |
| <b>seq811</b> | Firmicutes    | Clostridia   | 0                  | 0                   | 261                 | 0                    |
| <b>seq818</b> | Firmicutes    | Clostridia   | 0                  | 0                   | 0                   | 0                    |
| <b>seq824</b> | Firmicutes    | Clostridia   | 0                  | 0                   | 0                   | 0                    |
| <b>seq825</b> | Firmicutes    | Clostridia   | 0                  | 0                   | 0                   | 0                    |
| <b>seq834</b> | Firmicutes    | Clostridia   | 0                  | 0                   | 0                   | 0                    |
| <b>seq840</b> | Firmicutes    | Clostridia   | 19                 | 13                  | 0                   | 0                    |
| <b>seq844</b> | Firmicutes    | Clostridia   | 28                 | 41                  | 0                   | 0                    |
| <b>seq848</b> | Firmicutes    | Clostridia   | 0                  | 0                   | 0                   | 0                    |
| <b>seq854</b> | Firmicutes    | Clostridia   | 0                  | 0                   | 0                   | 0                    |
| <b>seq855</b> | Firmicutes    | Clostridia   | 0                  | 0                   | 0                   | 44                   |
| <b>seq856</b> | Firmicutes    | Clostridia   | 0                  | 0                   | 0                   | 0                    |
| <b>seq860</b> | Firmicutes    | Clostridia   | 0                  | 0                   | 0                   | 0                    |
| <b>seq864</b> | Firmicutes    | Clostridia   | 0                  | 0                   | 0                   | 0                    |
| <b>seq867</b> | Firmicutes    | Clostridia   | 0                  | 0                   | 0                   | 0                    |
| <b>seq875</b> | Firmicutes    | Clostridia   | 0                  | 81                  | 0                   | 0                    |
| <b>seq876</b> | Firmicutes    | Clostridia   | 0                  | 0                   | 0                   | 0                    |
| <b>seq878</b> | Firmicutes    | Clostridia   | 0                  | 0                   | 0                   | 0                    |
| <b>seq879</b> | Firmicutes    | Clostridia   | 0                  | 0                   | 0                   | 0                    |
| <b>seq883</b> | Firmicutes    | Clostridia   | 0                  | 0                   | 0                   | 0                    |
| <b>seq886</b> | Firmicutes    | Clostridia   | 0                  | 0                   | 0                   | 0                    |

Sequence Count Table

|               | <b>Phylum</b> | <b>Class</b> | <b>Subject8WK0</b> | <b>Subject8WK12</b> | <b>Subject9WK0</b> | <b>Subject9WK12</b> |
|---------------|---------------|--------------|--------------------|---------------------|--------------------|---------------------|
| <b>seq763</b> | Firmicutes    | Clostridia   | 0                  | 0                   | 0                  | 0                   |
| <b>seq772</b> | Firmicutes    | Clostridia   | 0                  | 0                   | 0                  | 0                   |
| <b>seq778</b> | Firmicutes    | Clostridia   | 0                  | 0                   | 0                  | 0                   |
| <b>seq782</b> | Firmicutes    | Clostridia   | 0                  | 0                   | 0                  | 0                   |
| <b>seq784</b> | Firmicutes    | Clostridia   | 0                  | 0                   | 25                 | 0                   |
| <b>seq785</b> | Firmicutes    | Clostridia   | 0                  | 0                   | 0                  | 0                   |
| <b>seq786</b> | Firmicutes    | Clostridia   | 0                  | 0                   | 0                  | 0                   |
| <b>seq787</b> | Firmicutes    | Clostridia   | 0                  | 0                   | 0                  | 0                   |
| <b>seq790</b> | Firmicutes    | Clostridia   | 0                  | 0                   | 123                | 159                 |
| <b>seq796</b> | Firmicutes    | Clostridia   | 0                  | 0                   | 0                  | 0                   |
| <b>seq797</b> | Firmicutes    | Clostridia   | 0                  | 0                   | 0                  | 0                   |
| <b>seq804</b> | Firmicutes    | Clostridia   | 0                  | 0                   | 0                  | 0                   |
| <b>seq811</b> | Firmicutes    | Clostridia   | 0                  | 0                   | 0                  | 0                   |
| <b>seq818</b> | Firmicutes    | Clostridia   | 0                  | 0                   | 0                  | 0                   |
| <b>seq824</b> | Firmicutes    | Clostridia   | 0                  | 0                   | 0                  | 0                   |
| <b>seq825</b> | Firmicutes    | Clostridia   | 0                  | 0                   | 0                  | 0                   |
| <b>seq834</b> | Firmicutes    | Clostridia   | 0                  | 0                   | 0                  | 0                   |
| <b>seq840</b> | Firmicutes    | Clostridia   | 0                  | 0                   | 0                  | 0                   |
| <b>seq844</b> | Firmicutes    | Clostridia   | 10                 | 21                  | 0                  | 0                   |
| <b>seq848</b> | Firmicutes    | Clostridia   | 0                  | 0                   | 0                  | 0                   |
| <b>seq854</b> | Firmicutes    | Clostridia   | 0                  | 0                   | 0                  | 0                   |
| <b>seq855</b> | Firmicutes    | Clostridia   | 13                 | 8                   | 0                  | 0                   |
| <b>seq856</b> | Firmicutes    | Clostridia   | 0                  | 0                   | 0                  | 0                   |
| <b>seq860</b> | Firmicutes    | Clostridia   | 0                  | 0                   | 0                  | 0                   |
| <b>seq864</b> | Firmicutes    | Clostridia   | 0                  | 0                   | 0                  | 0                   |
| <b>seq867</b> | Firmicutes    | Clostridia   | 13                 | 0                   | 0                  | 0                   |
| <b>seq875</b> | Firmicutes    | Clostridia   | 0                  | 0                   | 0                  | 0                   |
| <b>seq876</b> | Firmicutes    | Clostridia   | 0                  | 0                   | 0                  | 0                   |
| <b>seq878</b> | Firmicutes    | Clostridia   | 0                  | 0                   | 0                  | 0                   |
| <b>seq879</b> | Firmicutes    | Clostridia   | 83                 | 126                 | 0                  | 0                   |
| <b>seq883</b> | Firmicutes    | Clostridia   | 0                  | 0                   | 0                  | 0                   |
| <b>seq886</b> | Firmicutes    | Clostridia   | 0                  | 0                   | 0                  | 0                   |

Sequence Count Table

|        | <b>Phylum</b> | <b>Class</b> | <b>Subject10WK0</b> | <b>Subject10WK12</b> | <b>Subject22WK0</b> | <b>Subject22WK12</b> |
|--------|---------------|--------------|---------------------|----------------------|---------------------|----------------------|
| seq763 | Firmicutes    | Clostridia   | 0                   | 0                    | 0                   | 0                    |
| seq772 | Firmicutes    | Clostridia   | 0                   | 0                    | 0                   | 0                    |
| seq778 | Firmicutes    | Clostridia   | 0                   | 0                    | 0                   | 0                    |
| seq782 | Firmicutes    | Clostridia   | 0                   | 0                    | 0                   | 68                   |
| seq784 | Firmicutes    | Clostridia   | 0                   | 0                    | 0                   | 0                    |
| seq785 | Firmicutes    | Clostridia   | 0                   | 0                    | 0                   | 0                    |
| seq786 | Firmicutes    | Clostridia   | 0                   | 0                    | 0                   | 0                    |
| seq787 | Firmicutes    | Clostridia   | 0                   | 0                    | 0                   | 0                    |
| seq790 | Firmicutes    | Clostridia   | 0                   | 0                    | 0                   | 0                    |
| seq796 | Firmicutes    | Clostridia   | 0                   | 0                    | 0                   | 0                    |
| seq797 | Firmicutes    | Clostridia   | 0                   | 0                    | 0                   | 0                    |
| seq804 | Firmicutes    | Clostridia   | 0                   | 0                    | 0                   | 0                    |
| seq811 | Firmicutes    | Clostridia   | 0                   | 0                    | 0                   | 0                    |
| seq818 | Firmicutes    | Clostridia   | 0                   | 0                    | 0                   | 0                    |
| seq824 | Firmicutes    | Clostridia   | 0                   | 0                    | 0                   | 0                    |
| seq825 | Firmicutes    | Clostridia   | 22                  | 0                    | 7                   | 0                    |
| seq834 | Firmicutes    | Clostridia   | 0                   | 0                    | 0                   | 0                    |
| seq840 | Firmicutes    | Clostridia   | 0                   | 0                    | 0                   | 0                    |
| seq844 | Firmicutes    | Clostridia   | 0                   | 0                    | 0                   | 0                    |
| seq848 | Firmicutes    | Clostridia   | 0                   | 0                    | 0                   | 0                    |
| seq854 | Firmicutes    | Clostridia   | 0                   | 0                    | 0                   | 0                    |
| seq855 | Firmicutes    | Clostridia   | 16                  | 5                    | 0                   | 0                    |
| seq856 | Firmicutes    | Clostridia   | 0                   | 0                    | 0                   | 0                    |
| seq860 | Firmicutes    | Clostridia   | 0                   | 0                    | 0                   | 0                    |
| seq864 | Firmicutes    | Clostridia   | 0                   | 0                    | 0                   | 0                    |
| seq867 | Firmicutes    | Clostridia   | 0                   | 0                    | 0                   | 0                    |
| seq875 | Firmicutes    | Clostridia   | 0                   | 0                    | 46                  | 84                   |
| seq876 | Firmicutes    | Clostridia   | 0                   | 0                    | 0                   | 0                    |
| seq878 | Firmicutes    | Clostridia   | 0                   | 0                    | 0                   | 0                    |
| seq879 | Firmicutes    | Clostridia   | 0                   | 0                    | 0                   | 0                    |
| seq883 | Firmicutes    | Clostridia   | 206                 | 0                    | 0                   | 0                    |
| seq886 | Firmicutes    | Clostridia   | 0                   | 0                    | 0                   | 0                    |



Sequence Count Table

|               | <b>Phylum</b> | <b>Class</b> | <b>Subject23WK0</b> | <b>Subject23WK12</b> | <b>Subject24WK0</b> | <b>Subject24WK12</b> |
|---------------|---------------|--------------|---------------------|----------------------|---------------------|----------------------|
| <b>seq763</b> | Firmicutes    | Clostridia   | 137                 | 122                  | 0                   | 0                    |
| <b>seq772</b> | Firmicutes    | Clostridia   | 0                   | 0                    | 133                 | 162                  |
| <b>seq778</b> | Firmicutes    | Clostridia   | 0                   | 0                    | 0                   | 0                    |
| <b>seq782</b> | Firmicutes    | Clostridia   | 0                   | 0                    | 130                 | 0                    |
| <b>seq784</b> | Firmicutes    | Clostridia   | 0                   | 0                    | 0                   | 0                    |
| <b>seq785</b> | Firmicutes    | Clostridia   | 0                   | 0                    | 0                   | 0                    |
| <b>seq786</b> | Firmicutes    | Clostridia   | 22                  | 46                   | 155                 | 30                   |
| <b>seq787</b> | Firmicutes    | Clostridia   | 0                   | 0                    | 0                   | 0                    |
| <b>seq790</b> | Firmicutes    | Clostridia   | 0                   | 0                    | 0                   | 0                    |
| <b>seq796</b> | Firmicutes    | Clostridia   | 0                   | 0                    | 0                   | 0                    |
| <b>seq797</b> | Firmicutes    | Clostridia   | 0                   | 0                    | 0                   | 0                    |
| <b>seq804</b> | Firmicutes    | Clostridia   | 0                   | 0                    | 0                   | 0                    |
| <b>seq811</b> | Firmicutes    | Clostridia   | 0                   | 0                    | 0                   | 0                    |
| <b>seq818</b> | Firmicutes    | Clostridia   | 0                   | 0                    | 0                   | 0                    |
| <b>seq824</b> | Firmicutes    | Clostridia   | 0                   | 0                    | 0                   | 0                    |
| <b>seq825</b> | Firmicutes    | Clostridia   | 0                   | 4                    | 0                   | 8                    |
| <b>seq834</b> | Firmicutes    | Clostridia   | 0                   | 0                    | 0                   | 0                    |
| <b>seq840</b> | Firmicutes    | Clostridia   | 0                   | 0                    | 0                   | 0                    |
| <b>seq844</b> | Firmicutes    | Clostridia   | 0                   | 0                    | 0                   | 11                   |
| <b>seq848</b> | Firmicutes    | Clostridia   | 0                   | 0                    | 0                   | 0                    |
| <b>seq854</b> | Firmicutes    | Clostridia   | 13                  | 22                   | 10                  | 17                   |
| <b>seq855</b> | Firmicutes    | Clostridia   | 0                   | 0                    | 0                   | 8                    |
| <b>seq856</b> | Firmicutes    | Clostridia   | 0                   | 0                    | 76                  | 146                  |
| <b>seq860</b> | Firmicutes    | Clostridia   | 0                   | 0                    | 0                   | 0                    |
| <b>seq864</b> | Firmicutes    | Clostridia   | 0                   | 0                    | 0                   | 0                    |
| <b>seq867</b> | Firmicutes    | Clostridia   | 0                   | 0                    | 23                  | 24                   |
| <b>seq875</b> | Firmicutes    | Clostridia   | 0                   | 0                    | 0                   | 0                    |
| <b>seq876</b> | Firmicutes    | Clostridia   | 0                   | 0                    | 0                   | 0                    |
| <b>seq878</b> | Firmicutes    | Clostridia   | 0                   | 0                    | 0                   | 0                    |
| <b>seq879</b> | Firmicutes    | Clostridia   | 0                   | 0                    | 0                   | 0                    |
| <b>seq883</b> | Firmicutes    | Clostridia   | 0                   | 0                    | 0                   | 0                    |
| <b>seq886</b> | Firmicutes    | Clostridia   | 0                   | 0                    | 0                   | 0                    |

Sequence Count Table

|        | <b>Phylum</b> | <b>Class</b> | <b>Subject11WK0</b> | <b>Subject11WK12</b> | <b>Subject12WK0</b> | <b>Subject12WK12</b> |
|--------|---------------|--------------|---------------------|----------------------|---------------------|----------------------|
| seq763 | Firmicutes    | Clostridia   | 0                   | 0                    | 0                   | 0                    |
| seq772 | Firmicutes    | Clostridia   | 0                   | 0                    | 0                   | 0                    |
| seq778 | Firmicutes    | Clostridia   | 0                   | 0                    | 0                   | 0                    |
| seq782 | Firmicutes    | Clostridia   | 0                   | 0                    | 0                   | 0                    |
| seq784 | Firmicutes    | Clostridia   | 34                  | 0                    | 0                   | 0                    |
| seq785 | Firmicutes    | Clostridia   | 0                   | 0                    | 0                   | 0                    |
| seq786 | Firmicutes    | Clostridia   | 0                   | 0                    | 0                   | 0                    |
| seq787 | Firmicutes    | Clostridia   | 0                   | 0                    | 0                   | 0                    |
| seq790 | Firmicutes    | Clostridia   | 0                   | 0                    | 0                   | 0                    |
| seq796 | Firmicutes    | Clostridia   | 0                   | 0                    | 0                   | 0                    |
| seq797 | Firmicutes    | Clostridia   | 0                   | 0                    | 0                   | 0                    |
| seq804 | Firmicutes    | Clostridia   | 0                   | 0                    | 0                   | 0                    |
| seq811 | Firmicutes    | Clostridia   | 0                   | 0                    | 0                   | 0                    |
| seq818 | Firmicutes    | Clostridia   | 0                   | 0                    | 0                   | 0                    |
| seq824 | Firmicutes    | Clostridia   | 0                   | 0                    | 0                   | 0                    |
| seq825 | Firmicutes    | Clostridia   | 111                 | 11                   | 0                   | 0                    |
| seq834 | Firmicutes    | Clostridia   | 0                   | 0                    | 0                   | 0                    |
| seq840 | Firmicutes    | Clostridia   | 0                   | 0                    | 0                   | 0                    |
| seq844 | Firmicutes    | Clostridia   | 0                   | 0                    | 0                   | 14                   |
| seq848 | Firmicutes    | Clostridia   | 0                   | 0                    | 0                   | 0                    |
| seq854 | Firmicutes    | Clostridia   | 0                   | 0                    | 0                   | 0                    |
| seq855 | Firmicutes    | Clostridia   | 11                  | 0                    | 0                   | 0                    |
| seq856 | Firmicutes    | Clostridia   | 0                   | 0                    | 0                   | 0                    |
| seq860 | Firmicutes    | Clostridia   | 0                   | 0                    | 0                   | 0                    |
| seq864 | Firmicutes    | Clostridia   | 0                   | 0                    | 95                  | 123                  |
| seq867 | Firmicutes    | Clostridia   | 0                   | 0                    | 0                   | 19                   |
| seq875 | Firmicutes    | Clostridia   | 0                   | 0                    | 0                   | 0                    |
| seq876 | Firmicutes    | Clostridia   | 0                   | 0                    | 0                   | 0                    |
| seq878 | Firmicutes    | Clostridia   | 0                   | 0                    | 0                   | 0                    |
| seq879 | Firmicutes    | Clostridia   | 0                   | 0                    | 0                   | 0                    |
| seq883 | Firmicutes    | Clostridia   | 0                   | 0                    | 0                   | 0                    |
| seq886 | Firmicutes    | Clostridia   | 0                   | 0                    | 4                   | 23                   |

Sequence Count Table

|               | <b>Phylum</b> | <b>Class</b> | <b>Subject25WK0</b> | <b>Subject25WK12</b> | <b>Subject38WK0</b> | <b>Subject38WK12</b> |
|---------------|---------------|--------------|---------------------|----------------------|---------------------|----------------------|
| <b>seq763</b> | Firmicutes    | Clostridia   | 0                   | 0                    | 0                   | 0                    |
| <b>seq772</b> | Firmicutes    | Clostridia   | 0                   | 0                    | 0                   | 0                    |
| <b>seq778</b> | Firmicutes    | Clostridia   | 0                   | 0                    | 0                   | 0                    |
| <b>seq782</b> | Firmicutes    | Clostridia   | 0                   | 0                    | 0                   | 0                    |
| <b>seq784</b> | Firmicutes    | Clostridia   | 16                  | 0                    | 0                   | 0                    |
| <b>seq785</b> | Firmicutes    | Clostridia   | 0                   | 0                    | 0                   | 0                    |
| <b>seq786</b> | Firmicutes    | Clostridia   | 0                   | 0                    | 0                   | 0                    |
| <b>seq787</b> | Firmicutes    | Clostridia   | 0                   | 0                    | 0                   | 0                    |
| <b>seq790</b> | Firmicutes    | Clostridia   | 0                   | 0                    | 0                   | 0                    |
| <b>seq796</b> | Firmicutes    | Clostridia   | 0                   | 0                    | 0                   | 0                    |
| <b>seq797</b> | Firmicutes    | Clostridia   | 0                   | 0                    | 0                   | 0                    |
| <b>seq804</b> | Firmicutes    | Clostridia   | 0                   | 0                    | 0                   | 0                    |
| <b>seq811</b> | Firmicutes    | Clostridia   | 0                   | 0                    | 0                   | 0                    |
| <b>seq818</b> | Firmicutes    | Clostridia   | 0                   | 0                    | 0                   | 0                    |
| <b>seq824</b> | Firmicutes    | Clostridia   | 0                   | 0                    | 0                   | 0                    |
| <b>seq825</b> | Firmicutes    | Clostridia   | 0                   | 0                    | 0                   | 0                    |
| <b>seq834</b> | Firmicutes    | Clostridia   | 0                   | 0                    | 0                   | 0                    |
| <b>seq840</b> | Firmicutes    | Clostridia   | 0                   | 0                    | 0                   | 0                    |
| <b>seq844</b> | Firmicutes    | Clostridia   | 0                   | 0                    | 0                   | 0                    |
| <b>seq848</b> | Firmicutes    | Clostridia   | 0                   | 0                    | 0                   | 0                    |
| <b>seq854</b> | Firmicutes    | Clostridia   | 0                   | 0                    | 0                   | 0                    |
| <b>seq855</b> | Firmicutes    | Clostridia   | 0                   | 0                    | 0                   | 0                    |
| <b>seq856</b> | Firmicutes    | Clostridia   | 0                   | 0                    | 0                   | 0                    |
| <b>seq860</b> | Firmicutes    | Clostridia   | 0                   | 0                    | 0                   | 0                    |
| <b>seq864</b> | Firmicutes    | Clostridia   | 0                   | 0                    | 0                   | 0                    |
| <b>seq867</b> | Firmicutes    | Clostridia   | 0                   | 0                    | 0                   | 0                    |
| <b>seq875</b> | Firmicutes    | Clostridia   | 0                   | 0                    | 0                   | 0                    |
| <b>seq876</b> | Firmicutes    | Clostridia   | 0                   | 0                    | 0                   | 0                    |
| <b>seq878</b> | Firmicutes    | Clostridia   | 0                   | 0                    | 0                   | 0                    |
| <b>seq879</b> | Firmicutes    | Clostridia   | 0                   | 0                    | 0                   | 0                    |
| <b>seq883</b> | Firmicutes    | Clostridia   | 0                   | 0                    | 0                   | 0                    |
| <b>seq886</b> | Firmicutes    | Clostridia   | 0                   | 0                    | 0                   | 0                    |

Sequence Count Table

|               | <b>Phylum</b> | <b>Class</b> | <b>Subject31WK0</b> | <b>Subject31WK12</b> | <b>Subject32WK0</b> | <b>Subject32WK12</b> |
|---------------|---------------|--------------|---------------------|----------------------|---------------------|----------------------|
| <b>seq763</b> | Firmicutes    | Clostridia   | 0                   | 0                    | 0                   | 0                    |
| <b>seq772</b> | Firmicutes    | Clostridia   | 0                   | 0                    | 0                   | 0                    |
| <b>seq778</b> | Firmicutes    | Clostridia   | 0                   | 0                    | 0                   | 0                    |
| <b>seq782</b> | Firmicutes    | Clostridia   | 0                   | 0                    | 0                   | 0                    |
| <b>seq784</b> | Firmicutes    | Clostridia   | 0                   | 0                    | 0                   | 0                    |
| <b>seq785</b> | Firmicutes    | Clostridia   | 0                   | 0                    | 0                   | 0                    |
| <b>seq786</b> | Firmicutes    | Clostridia   | 0                   | 0                    | 0                   | 0                    |
| <b>seq787</b> | Firmicutes    | Clostridia   | 0                   | 0                    | 0                   | 0                    |
| <b>seq790</b> | Firmicutes    | Clostridia   | 0                   | 0                    | 0                   | 0                    |
| <b>seq796</b> | Firmicutes    | Clostridia   | 0                   | 0                    | 0                   | 0                    |
| <b>seq797</b> | Firmicutes    | Clostridia   | 0                   | 0                    | 0                   | 0                    |
| <b>seq804</b> | Firmicutes    | Clostridia   | 0                   | 0                    | 0                   | 0                    |
| <b>seq811</b> | Firmicutes    | Clostridia   | 0                   | 0                    | 0                   | 0                    |
| <b>seq818</b> | Firmicutes    | Clostridia   | 0                   | 0                    | 0                   | 0                    |
| <b>seq824</b> | Firmicutes    | Clostridia   | 0                   | 0                    | 0                   | 0                    |
| <b>seq825</b> | Firmicutes    | Clostridia   | 0                   | 0                    | 0                   | 0                    |
| <b>seq834</b> | Firmicutes    | Clostridia   | 0                   | 0                    | 0                   | 0                    |
| <b>seq840</b> | Firmicutes    | Clostridia   | 0                   | 0                    | 133                 | 0                    |
| <b>seq844</b> | Firmicutes    | Clostridia   | 0                   | 0                    | 0                   | 0                    |
| <b>seq848</b> | Firmicutes    | Clostridia   | 0                   | 0                    | 0                   | 0                    |
| <b>seq854</b> | Firmicutes    | Clostridia   | 0                   | 0                    | 0                   | 0                    |
| <b>seq855</b> | Firmicutes    | Clostridia   | 0                   | 0                    | 0                   | 0                    |
| <b>seq856</b> | Firmicutes    | Clostridia   | 0                   | 0                    | 0                   | 0                    |
| <b>seq860</b> | Firmicutes    | Clostridia   | 0                   | 0                    | 0                   | 0                    |
| <b>seq864</b> | Firmicutes    | Clostridia   | 0                   | 0                    | 0                   | 0                    |
| <b>seq867</b> | Firmicutes    | Clostridia   | 0                   | 0                    | 0                   | 0                    |
| <b>seq875</b> | Firmicutes    | Clostridia   | 0                   | 0                    | 0                   | 0                    |
| <b>seq876</b> | Firmicutes    | Clostridia   | 0                   | 0                    | 0                   | 0                    |
| <b>seq878</b> | Firmicutes    | Clostridia   | 0                   | 0                    | 0                   | 0                    |
| <b>seq879</b> | Firmicutes    | Clostridia   | 0                   | 0                    | 0                   | 0                    |
| <b>seq883</b> | Firmicutes    | Clostridia   | 0                   | 0                    | 0                   | 0                    |
| <b>seq886</b> | Firmicutes    | Clostridia   | 0                   | 0                    | 0                   | 0                    |

Sequence Count Table

|               | <b>Phylum</b> | <b>Class</b> | <b>Subject13WK0</b> | <b>Subject13WK12</b> | <b>Subject39WK0</b> | <b>Subject39WK12</b> |
|---------------|---------------|--------------|---------------------|----------------------|---------------------|----------------------|
| <b>seq763</b> | Firmicutes    | Clostridia   | 0                   | 0                    | 0                   | 0                    |
| <b>seq772</b> | Firmicutes    | Clostridia   | 0                   | 0                    | 0                   | 0                    |
| <b>seq778</b> | Firmicutes    | Clostridia   | 0                   | 0                    | 0                   | 0                    |
| <b>seq782</b> | Firmicutes    | Clostridia   | 7                   | 0                    | 0                   | 0                    |
| <b>seq784</b> | Firmicutes    | Clostridia   | 0                   | 0                    | 0                   | 0                    |
| <b>seq785</b> | Firmicutes    | Clostridia   | 0                   | 0                    | 0                   | 0                    |
| <b>seq786</b> | Firmicutes    | Clostridia   | 0                   | 0                    | 0                   | 0                    |
| <b>seq787</b> | Firmicutes    | Clostridia   | 0                   | 0                    | 0                   | 0                    |
| <b>seq790</b> | Firmicutes    | Clostridia   | 0                   | 0                    | 0                   | 0                    |
| <b>seq796</b> | Firmicutes    | Clostridia   | 0                   | 0                    | 0                   | 0                    |
| <b>seq797</b> | Firmicutes    | Clostridia   | 0                   | 0                    | 0                   | 0                    |
| <b>seq804</b> | Firmicutes    | Clostridia   | 0                   | 0                    | 0                   | 0                    |
| <b>seq811</b> | Firmicutes    | Clostridia   | 0                   | 0                    | 0                   | 0                    |
| <b>seq818</b> | Firmicutes    | Clostridia   | 0                   | 0                    | 0                   | 255                  |
| <b>seq824</b> | Firmicutes    | Clostridia   | 0                   | 0                    | 0                   | 0                    |
| <b>seq825</b> | Firmicutes    | Clostridia   | 0                   | 0                    | 0                   | 2                    |
| <b>seq834</b> | Firmicutes    | Clostridia   | 0                   | 0                    | 0                   | 0                    |
| <b>seq840</b> | Firmicutes    | Clostridia   | 0                   | 0                    | 0                   | 0                    |
| <b>seq844</b> | Firmicutes    | Clostridia   | 0                   | 0                    | 0                   | 0                    |
| <b>seq848</b> | Firmicutes    | Clostridia   | 0                   | 0                    | 0                   | 0                    |
| <b>seq854</b> | Firmicutes    | Clostridia   | 9                   | 28                   | 0                   | 0                    |
| <b>seq855</b> | Firmicutes    | Clostridia   | 0                   | 0                    | 0                   | 0                    |
| <b>seq856</b> | Firmicutes    | Clostridia   | 0                   | 0                    | 0                   | 0                    |
| <b>seq860</b> | Firmicutes    | Clostridia   | 0                   | 111                  | 0                   | 0                    |
| <b>seq864</b> | Firmicutes    | Clostridia   | 0                   | 0                    | 0                   | 0                    |
| <b>seq867</b> | Firmicutes    | Clostridia   | 0                   | 0                    | 0                   | 0                    |
| <b>seq875</b> | Firmicutes    | Clostridia   | 0                   | 0                    | 0                   | 0                    |
| <b>seq876</b> | Firmicutes    | Clostridia   | 0                   | 0                    | 0                   | 0                    |
| <b>seq878</b> | Firmicutes    | Clostridia   | 0                   | 0                    | 0                   | 0                    |
| <b>seq879</b> | Firmicutes    | Clostridia   | 0                   | 0                    | 0                   | 0                    |
| <b>seq883</b> | Firmicutes    | Clostridia   | 0                   | 0                    | 0                   | 0                    |
| <b>seq886</b> | Firmicutes    | Clostridia   | 0                   | 0                    | 0                   | 0                    |

Sequence Count Table

|        | <b>Phylum</b> | <b>Class</b> | <b>Subject26WK0</b> | <b>Subject26WK12</b> | <b>Subject14WK0</b> | <b>Subject14WK12</b> |
|--------|---------------|--------------|---------------------|----------------------|---------------------|----------------------|
| seq763 | Firmicutes    | Clostridia   | 0                   | 0                    | 0                   | 0                    |
| seq772 | Firmicutes    | Clostridia   | 0                   | 0                    | 0                   | 0                    |
| seq778 | Firmicutes    | Clostridia   | 0                   | 0                    | 0                   | 0                    |
| seq782 | Firmicutes    | Clostridia   | 0                   | 0                    | 0                   | 0                    |
| seq784 | Firmicutes    | Clostridia   | 37                  | 42                   | 0                   | 0                    |
| seq785 | Firmicutes    | Clostridia   | 0                   | 0                    | 0                   | 0                    |
| seq786 | Firmicutes    | Clostridia   | 0                   | 0                    | 0                   | 0                    |
| seq787 | Firmicutes    | Clostridia   | 0                   | 0                    | 0                   | 0                    |
| seq790 | Firmicutes    | Clostridia   | 0                   | 0                    | 0                   | 0                    |
| seq796 | Firmicutes    | Clostridia   | 0                   | 0                    | 0                   | 0                    |
| seq797 | Firmicutes    | Clostridia   | 0                   | 0                    | 0                   | 0                    |
| seq804 | Firmicutes    | Clostridia   | 0                   | 0                    | 0                   | 0                    |
| seq811 | Firmicutes    | Clostridia   | 0                   | 0                    | 0                   | 0                    |
| seq818 | Firmicutes    | Clostridia   | 0                   | 0                    | 0                   | 0                    |
| seq824 | Firmicutes    | Clostridia   | 147                 | 104                  | 0                   | 0                    |
| seq825 | Firmicutes    | Clostridia   | 9                   | 12                   | 0                   | 0                    |
| seq834 | Firmicutes    | Clostridia   | 0                   | 0                    | 0                   | 0                    |
| seq840 | Firmicutes    | Clostridia   | 0                   | 0                    | 0                   | 0                    |
| seq844 | Firmicutes    | Clostridia   | 0                   | 0                    | 0                   | 0                    |
| seq848 | Firmicutes    | Clostridia   | 0                   | 0                    | 0                   | 0                    |
| seq854 | Firmicutes    | Clostridia   | 0                   | 0                    | 0                   | 10                   |
| seq855 | Firmicutes    | Clostridia   | 0                   | 0                    | 0                   | 0                    |
| seq856 | Firmicutes    | Clostridia   | 0                   | 0                    | 0                   | 0                    |
| seq860 | Firmicutes    | Clostridia   | 0                   | 0                    | 0                   | 0                    |
| seq864 | Firmicutes    | Clostridia   | 0                   | 0                    | 0                   | 0                    |
| seq867 | Firmicutes    | Clostridia   | 0                   | 0                    | 15                  | 9                    |
| seq875 | Firmicutes    | Clostridia   | 0                   | 0                    | 0                   | 0                    |
| seq876 | Firmicutes    | Clostridia   | 0                   | 0                    | 0                   | 0                    |
| seq878 | Firmicutes    | Clostridia   | 0                   | 0                    | 0                   | 0                    |
| seq879 | Firmicutes    | Clostridia   | 0                   | 0                    | 0                   | 0                    |
| seq883 | Firmicutes    | Clostridia   | 0                   | 0                    | 0                   | 0                    |
| seq886 | Firmicutes    | Clostridia   | 0                   | 0                    | 0                   | 0                    |

Sequence Count Table

|               | <b>Phylum</b> | <b>Class</b> | <b>Subject27WK0</b> | <b>Subject27WK12</b> | <b>Subject15WK0</b> | <b>Subject15WK12</b> |
|---------------|---------------|--------------|---------------------|----------------------|---------------------|----------------------|
| <b>seq763</b> | Firmicutes    | Clostridia   | 0                   | 0                    | 22                  | 21                   |
| <b>seq772</b> | Firmicutes    | Clostridia   | 0                   | 0                    | 0                   | 0                    |
| <b>seq778</b> | Firmicutes    | Clostridia   | 0                   | 0                    | 0                   | 0                    |
| <b>seq782</b> | Firmicutes    | Clostridia   | 0                   | 0                    | 0                   | 0                    |
| <b>seq784</b> | Firmicutes    | Clostridia   | 0                   | 0                    | 0                   | 0                    |
| <b>seq785</b> | Firmicutes    | Clostridia   | 0                   | 0                    | 0                   | 0                    |
| <b>seq786</b> | Firmicutes    | Clostridia   | 0                   | 0                    | 0                   | 0                    |
| <b>seq787</b> | Firmicutes    | Clostridia   | 0                   | 0                    | 0                   | 0                    |
| <b>seq790</b> | Firmicutes    | Clostridia   | 0                   | 0                    | 0                   | 0                    |
| <b>seq796</b> | Firmicutes    | Clostridia   | 0                   | 0                    | 137                 | 138                  |
| <b>seq797</b> | Firmicutes    | Clostridia   | 0                   | 0                    | 0                   | 0                    |
| <b>seq804</b> | Firmicutes    | Clostridia   | 0                   | 0                    | 0                   | 0                    |
| <b>seq811</b> | Firmicutes    | Clostridia   | 0                   | 0                    | 0                   | 0                    |
| <b>seq818</b> | Firmicutes    | Clostridia   | 0                   | 0                    | 0                   | 0                    |
| <b>seq824</b> | Firmicutes    | Clostridia   | 0                   | 0                    | 0                   | 0                    |
| <b>seq825</b> | Firmicutes    | Clostridia   | 0                   | 0                    | 0                   | 0                    |
| <b>seq834</b> | Firmicutes    | Clostridia   | 0                   | 0                    | 0                   | 0                    |
| <b>seq840</b> | Firmicutes    | Clostridia   | 0                   | 0                    | 18                  | 22                   |
| <b>seq844</b> | Firmicutes    | Clostridia   | 0                   | 0                    | 21                  | 0                    |
| <b>seq848</b> | Firmicutes    | Clostridia   | 0                   | 0                    | 0                   | 0                    |
| <b>seq854</b> | Firmicutes    | Clostridia   | 0                   | 0                    | 0                   | 0                    |
| <b>seq855</b> | Firmicutes    | Clostridia   | 0                   | 0                    | 0                   | 0                    |
| <b>seq856</b> | Firmicutes    | Clostridia   | 0                   | 0                    | 0                   | 0                    |
| <b>seq860</b> | Firmicutes    | Clostridia   | 0                   | 0                    | 0                   | 0                    |
| <b>seq864</b> | Firmicutes    | Clostridia   | 0                   | 0                    | 0                   | 0                    |
| <b>seq867</b> | Firmicutes    | Clostridia   | 0                   | 0                    | 0                   | 0                    |
| <b>seq875</b> | Firmicutes    | Clostridia   | 0                   | 0                    | 0                   | 0                    |
| <b>seq876</b> | Firmicutes    | Clostridia   | 0                   | 0                    | 0                   | 0                    |
| <b>seq878</b> | Firmicutes    | Clostridia   | 0                   | 0                    | 0                   | 210                  |
| <b>seq879</b> | Firmicutes    | Clostridia   | 0                   | 0                    | 0                   | 0                    |
| <b>seq883</b> | Firmicutes    | Clostridia   | 0                   | 0                    | 0                   | 0                    |
| <b>seq886</b> | Firmicutes    | Clostridia   | 0                   | 0                    | 0                   | 0                    |

Sequence Count Table

|               | <b>Phylum</b> | <b>Class</b> | <b>Δ</b> |  |  |  |
|---------------|---------------|--------------|----------|--|--|--|
| <b>seq763</b> | Firmicutes    | Clostridia   |          |  |  |  |
| <b>seq772</b> | Firmicutes    | Clostridia   |          |  |  |  |
| <b>seq778</b> | Firmicutes    | Clostridia   |          |  |  |  |
| <b>seq782</b> | Firmicutes    | Clostridia   |          |  |  |  |
| <b>seq784</b> | Firmicutes    | Clostridia   |          |  |  |  |
| <b>seq785</b> | Firmicutes    | Clostridia   |          |  |  |  |
| <b>seq786</b> | Firmicutes    | Clostridia   |          |  |  |  |
| <b>seq787</b> | Firmicutes    | Clostridia   |          |  |  |  |
| <b>seq790</b> | Firmicutes    | Clostridia   |          |  |  |  |
| <b>seq796</b> | Firmicutes    | Clostridia   |          |  |  |  |
| <b>seq797</b> | Firmicutes    | Clostridia   |          |  |  |  |
| <b>seq804</b> | Firmicutes    | Clostridia   |          |  |  |  |
| <b>seq811</b> | Firmicutes    | Clostridia   |          |  |  |  |
| <b>seq818</b> | Firmicutes    | Clostridia   |          |  |  |  |
| <b>seq824</b> | Firmicutes    | Clostridia   |          |  |  |  |
| <b>seq825</b> | Firmicutes    | Clostridia   |          |  |  |  |
| <b>seq834</b> | Firmicutes    | Clostridia   |          |  |  |  |
| <b>seq840</b> | Firmicutes    | Clostridia   |          |  |  |  |
| <b>seq844</b> | Firmicutes    | Clostridia   |          |  |  |  |
| <b>seq848</b> | Firmicutes    | Clostridia   |          |  |  |  |
| <b>seq854</b> | Firmicutes    | Clostridia   |          |  |  |  |
| <b>seq855</b> | Firmicutes    | Clostridia   |          |  |  |  |
| <b>seq856</b> | Firmicutes    | Clostridia   |          |  |  |  |
| <b>seq860</b> | Firmicutes    | Clostridia   |          |  |  |  |
| <b>seq864</b> | Firmicutes    | Clostridia   |          |  |  |  |
| <b>seq867</b> | Firmicutes    | Clostridia   |          |  |  |  |
| <b>seq875</b> | Firmicutes    | Clostridia   |          |  |  |  |
| <b>seq876</b> | Firmicutes    | Clostridia   |          |  |  |  |
| <b>seq878</b> | Firmicutes    | Clostridia   |          |  |  |  |
| <b>seq879</b> | Firmicutes    | Clostridia   |          |  |  |  |
| <b>seq883</b> | Firmicutes    | Clostridia   |          |  |  |  |
| <b>seq886</b> | Firmicutes    | Clostridia   |          |  |  |  |



Sequence Count Table

|                | <b>Phylum</b> | <b>Class</b> | <b>Order</b>  | <b>Family</b>   |
|----------------|---------------|--------------|---------------|-----------------|
| <b>seq891</b>  | Firmicutes    | Clostridia   | Clostridiales | Lachnospiraceae |
| <b>seq892</b>  | Firmicutes    | Clostridia   | Clostridiales | Lachnospiraceae |
| <b>seq907</b>  | Firmicutes    | Clostridia   | Clostridiales | Lachnospiraceae |
| <b>seq936</b>  | Firmicutes    | Clostridia   | Clostridiales | Lachnospiraceae |
| <b>seq943</b>  | Firmicutes    | Clostridia   | Clostridiales | Lachnospiraceae |
| <b>seq947</b>  | Firmicutes    | Clostridia   | Clostridiales | Lachnospiraceae |
| <b>seq952</b>  | Firmicutes    | Clostridia   | Clostridiales | Lachnospiraceae |
| <b>seq958</b>  | Firmicutes    | Clostridia   | Clostridiales | Lachnospiraceae |
| <b>seq959</b>  | Firmicutes    | Clostridia   | Clostridiales | Lachnospiraceae |
| <b>seq960</b>  | Firmicutes    | Clostridia   | Clostridiales | Lachnospiraceae |
| <b>seq961</b>  | Firmicutes    | Clostridia   | Clostridiales | Lachnospiraceae |
| <b>seq964</b>  | Firmicutes    | Clostridia   | Clostridiales | Lachnospiraceae |
| <b>seq970</b>  | Firmicutes    | Clostridia   | Clostridiales | Lachnospiraceae |
| <b>seq981</b>  | Firmicutes    | Clostridia   | Clostridiales | Lachnospiraceae |
| <b>seq982</b>  | Firmicutes    | Clostridia   | Clostridiales | Lachnospiraceae |
| <b>seq983</b>  | Firmicutes    | Clostridia   | Clostridiales | Lachnospiraceae |
| <b>seq990</b>  | Firmicutes    | Clostridia   | Clostridiales | Lachnospiraceae |
| <b>seq1001</b> | Firmicutes    | Clostridia   | Clostridiales | Lachnospiraceae |
| <b>seq1010</b> | Firmicutes    | Clostridia   | Clostridiales | Lachnospiraceae |
| <b>seq1011</b> | Firmicutes    | Clostridia   | Clostridiales | Lachnospiraceae |
| <b>seq1014</b> | Firmicutes    | Clostridia   | Clostridiales | Lachnospiraceae |
| <b>seq1022</b> | Firmicutes    | Clostridia   | Clostridiales | Lachnospiraceae |
| <b>seq1028</b> | Firmicutes    | Clostridia   | Clostridiales | Lachnospiraceae |
| <b>seq1036</b> | Firmicutes    | Clostridia   | Clostridiales | Lachnospiraceae |
| <b>seq1037</b> | Firmicutes    | Clostridia   | Clostridiales | Lachnospiraceae |
| <b>seq1042</b> | Firmicutes    | Clostridia   | Clostridiales | Lachnospiraceae |
| <b>seq1052</b> | Firmicutes    | Clostridia   | Clostridiales | Lachnospiraceae |
| <b>seq1053</b> | Firmicutes    | Clostridia   | Clostridiales | Lachnospiraceae |
| <b>seq1056</b> | Firmicutes    | Clostridia   | Clostridiales | Lachnospiraceae |
| <b>seq1058</b> | Firmicutes    | Clostridia   | Clostridiales | Lachnospiraceae |
| <b>seq1062</b> | Firmicutes    | Clostridia   | Clostridiales | Lachnospiraceae |
| <b>seq1073</b> | Firmicutes    | Clostridia   | Clostridiales | Lachnospiraceae |

Sequence Count Table

|                | <b>Phylum</b> | <b>Class</b> | <b>Genus</b> | <b>Species</b> |
|----------------|---------------|--------------|--------------|----------------|
| <b>seq891</b>  | Firmicutes    | Clostridia   |              |                |
| <b>seq892</b>  | Firmicutes    | Clostridia   |              |                |
| <b>seq907</b>  | Firmicutes    | Clostridia   |              |                |
| <b>seq936</b>  | Firmicutes    | Clostridia   |              |                |
| <b>seq943</b>  | Firmicutes    | Clostridia   |              |                |
| <b>seq947</b>  | Firmicutes    | Clostridia   |              |                |
| <b>seq952</b>  | Firmicutes    | Clostridia   |              |                |
| <b>seq958</b>  | Firmicutes    | Clostridia   |              |                |
| <b>seq959</b>  | Firmicutes    | Clostridia   |              |                |
| <b>seq960</b>  | Firmicutes    | Clostridia   |              |                |
| <b>seq961</b>  | Firmicutes    | Clostridia   |              |                |
| <b>seq964</b>  | Firmicutes    | Clostridia   |              |                |
| <b>seq970</b>  | Firmicutes    | Clostridia   |              |                |
| <b>seq981</b>  | Firmicutes    | Clostridia   |              |                |
| <b>seq982</b>  | Firmicutes    | Clostridia   |              |                |
| <b>seq983</b>  | Firmicutes    | Clostridia   |              |                |
| <b>seq990</b>  | Firmicutes    | Clostridia   |              |                |
| <b>seq1001</b> | Firmicutes    | Clostridia   |              |                |
| <b>seq1010</b> | Firmicutes    | Clostridia   |              |                |
| <b>seq1011</b> | Firmicutes    | Clostridia   |              |                |
| <b>seq1014</b> | Firmicutes    | Clostridia   |              |                |
| <b>seq1022</b> | Firmicutes    | Clostridia   |              |                |
| <b>seq1028</b> | Firmicutes    | Clostridia   |              |                |
| <b>seq1036</b> | Firmicutes    | Clostridia   |              |                |
| <b>seq1037</b> | Firmicutes    | Clostridia   |              |                |
| <b>seq1042</b> | Firmicutes    | Clostridia   |              |                |
| <b>seq1052</b> | Firmicutes    | Clostridia   |              |                |
| <b>seq1053</b> | Firmicutes    | Clostridia   |              |                |
| <b>seq1056</b> | Firmicutes    | Clostridia   |              |                |
| <b>seq1058</b> | Firmicutes    | Clostridia   |              |                |
| <b>seq1062</b> | Firmicutes    | Clostridia   |              |                |
| <b>seq1073</b> | Firmicutes    | Clostridia   |              |                |

Sequence Count Table

|                | <b>Phylum</b> | <b>Class</b> | <b>Subject34WK0</b> | <b>Subject34WK12</b> | <b>Subject16WK0</b> | <b>Subject16WK12</b> |
|----------------|---------------|--------------|---------------------|----------------------|---------------------|----------------------|
| <b>seq891</b>  | Firmicutes    | Clostridia   | 0                   | 0                    | 0                   | 0                    |
| <b>seq892</b>  | Firmicutes    | Clostridia   | 0                   | 0                    | 0                   | 0                    |
| <b>seq907</b>  | Firmicutes    | Clostridia   | 0                   | 0                    | 0                   | 0                    |
| <b>seq936</b>  | Firmicutes    | Clostridia   | 0                   | 0                    | 0                   | 0                    |
| <b>seq943</b>  | Firmicutes    | Clostridia   | 0                   | 0                    | 0                   | 0                    |
| <b>seq947</b>  | Firmicutes    | Clostridia   | 0                   | 0                    | 0                   | 0                    |
| <b>seq952</b>  | Firmicutes    | Clostridia   | 0                   | 0                    | 0                   | 0                    |
| <b>seq958</b>  | Firmicutes    | Clostridia   | 0                   | 0                    | 0                   | 0                    |
| <b>seq959</b>  | Firmicutes    | Clostridia   | 0                   | 0                    | 0                   | 0                    |
| <b>seq960</b>  | Firmicutes    | Clostridia   | 0                   | 0                    | 0                   | 0                    |
| <b>seq961</b>  | Firmicutes    | Clostridia   | 0                   | 0                    | 0                   | 0                    |
| <b>seq964</b>  | Firmicutes    | Clostridia   | 0                   | 0                    | 0                   | 0                    |
| <b>seq970</b>  | Firmicutes    | Clostridia   | 0                   | 0                    | 0                   | 0                    |
| <b>seq981</b>  | Firmicutes    | Clostridia   | 0                   | 0                    | 131                 | 19                   |
| <b>seq982</b>  | Firmicutes    | Clostridia   | 0                   | 0                    | 0                   | 0                    |
| <b>seq983</b>  | Firmicutes    | Clostridia   | 0                   | 0                    | 0                   | 0                    |
| <b>seq990</b>  | Firmicutes    | Clostridia   | 0                   | 0                    | 0                   | 0                    |
| <b>seq1001</b> | Firmicutes    | Clostridia   | 0                   | 0                    | 0                   | 0                    |
| <b>seq1010</b> | Firmicutes    | Clostridia   | 0                   | 0                    | 0                   | 0                    |
| <b>seq1011</b> | Firmicutes    | Clostridia   | 0                   | 0                    | 0                   | 0                    |
| <b>seq1014</b> | Firmicutes    | Clostridia   | 0                   | 0                    | 0                   | 0                    |
| <b>seq1022</b> | Firmicutes    | Clostridia   | 0                   | 0                    | 0                   | 0                    |
| <b>seq1028</b> | Firmicutes    | Clostridia   | 0                   | 0                    | 0                   | 0                    |
| <b>seq1036</b> | Firmicutes    | Clostridia   | 0                   | 0                    | 0                   | 0                    |
| <b>seq1037</b> | Firmicutes    | Clostridia   | 0                   | 0                    | 0                   | 0                    |
| <b>seq1042</b> | Firmicutes    | Clostridia   | 0                   | 0                    | 0                   | 0                    |
| <b>seq1052</b> | Firmicutes    | Clostridia   | 0                   | 0                    | 0                   | 0                    |
| <b>seq1053</b> | Firmicutes    | Clostridia   | 0                   | 0                    | 0                   | 0                    |
| <b>seq1056</b> | Firmicutes    | Clostridia   | 0                   | 0                    | 0                   | 0                    |
| <b>seq1058</b> | Firmicutes    | Clostridia   | 0                   | 0                    | 0                   | 0                    |
| <b>seq1062</b> | Firmicutes    | Clostridia   | 0                   | 0                    | 0                   | 0                    |
| <b>seq1073</b> | Firmicutes    | Clostridia   | 0                   | 0                    | 0                   | 0                    |

Sequence Count Table

|                | <b>Phylum</b> | <b>Class</b> | <b>Subject17WK0</b> | <b>Subject17WK12</b> | <b>Subject1WK0</b> | <b>Subject1WK12</b> |
|----------------|---------------|--------------|---------------------|----------------------|--------------------|---------------------|
| <b>seq891</b>  | Firmicutes    | Clostridia   | 0                   | 0                    | 0                  | 0                   |
| <b>seq892</b>  | Firmicutes    | Clostridia   | 0                   | 0                    | 0                  | 0                   |
| <b>seq907</b>  | Firmicutes    | Clostridia   | 0                   | 0                    | 0                  | 0                   |
| <b>seq936</b>  | Firmicutes    | Clostridia   | 0                   | 0                    | 0                  | 0                   |
| <b>seq943</b>  | Firmicutes    | Clostridia   | 0                   | 0                    | 0                  | 0                   |
| <b>seq947</b>  | Firmicutes    | Clostridia   | 0                   | 0                    | 0                  | 0                   |
| <b>seq952</b>  | Firmicutes    | Clostridia   | 0                   | 0                    | 0                  | 0                   |
| <b>seq958</b>  | Firmicutes    | Clostridia   | 0                   | 0                    | 71                 | 89                  |
| <b>seq959</b>  | Firmicutes    | Clostridia   | 0                   | 0                    | 0                  | 0                   |
| <b>seq960</b>  | Firmicutes    | Clostridia   | 0                   | 0                    | 0                  | 0                   |
| <b>seq961</b>  | Firmicutes    | Clostridia   | 0                   | 0                    | 0                  | 0                   |
| <b>seq964</b>  | Firmicutes    | Clostridia   | 0                   | 8                    | 0                  | 0                   |
| <b>seq970</b>  | Firmicutes    | Clostridia   | 0                   | 0                    | 0                  | 0                   |
| <b>seq981</b>  | Firmicutes    | Clostridia   | 0                   | 0                    | 0                  | 0                   |
| <b>seq982</b>  | Firmicutes    | Clostridia   | 0                   | 0                    | 0                  | 0                   |
| <b>seq983</b>  | Firmicutes    | Clostridia   | 0                   | 0                    | 0                  | 0                   |
| <b>seq990</b>  | Firmicutes    | Clostridia   | 0                   | 0                    | 0                  | 0                   |
| <b>seq1001</b> | Firmicutes    | Clostridia   | 0                   | 0                    | 0                  | 0                   |
| <b>seq1010</b> | Firmicutes    | Clostridia   | 0                   | 0                    | 0                  | 0                   |
| <b>seq1011</b> | Firmicutes    | Clostridia   | 0                   | 0                    | 0                  | 0                   |
| <b>seq1014</b> | Firmicutes    | Clostridia   | 0                   | 0                    | 0                  | 0                   |
| <b>seq1022</b> | Firmicutes    | Clostridia   | 0                   | 0                    | 0                  | 0                   |
| <b>seq1028</b> | Firmicutes    | Clostridia   | 0                   | 0                    | 0                  | 0                   |
| <b>seq1036</b> | Firmicutes    | Clostridia   | 0                   | 0                    | 0                  | 0                   |
| <b>seq1037</b> | Firmicutes    | Clostridia   | 0                   | 0                    | 0                  | 0                   |
| <b>seq1042</b> | Firmicutes    | Clostridia   | 0                   | 0                    | 0                  | 0                   |
| <b>seq1052</b> | Firmicutes    | Clostridia   | 0                   | 0                    | 0                  | 0                   |
| <b>seq1053</b> | Firmicutes    | Clostridia   | 0                   | 0                    | 0                  | 0                   |
| <b>seq1056</b> | Firmicutes    | Clostridia   | 0                   | 0                    | 0                  | 0                   |
| <b>seq1058</b> | Firmicutes    | Clostridia   | 0                   | 0                    | 0                  | 0                   |
| <b>seq1062</b> | Firmicutes    | Clostridia   | 0                   | 0                    | 0                  | 0                   |
| <b>seq1073</b> | Firmicutes    | Clostridia   | 0                   | 0                    | 0                  | 0                   |

Sequence Count Table

|                | <b>Phylum</b> | <b>Class</b> | <b>Subject2WK0</b> | <b>Subject2WK12</b> | <b>Subject3WK0</b> | <b>Subject3WK12</b> |
|----------------|---------------|--------------|--------------------|---------------------|--------------------|---------------------|
| <b>seq891</b>  | Firmicutes    | Clostridia   | 0                  | 0                   | 0                  | 0                   |
| <b>seq892</b>  | Firmicutes    | Clostridia   | 0                  | 0                   | 0                  | 0                   |
| <b>seq907</b>  | Firmicutes    | Clostridia   | 0                  | 0                   | 0                  | 0                   |
| <b>seq936</b>  | Firmicutes    | Clostridia   | 0                  | 0                   | 0                  | 0                   |
| <b>seq943</b>  | Firmicutes    | Clostridia   | 0                  | 0                   | 0                  | 0                   |
| <b>seq947</b>  | Firmicutes    | Clostridia   | 0                  | 0                   | 0                  | 0                   |
| <b>seq952</b>  | Firmicutes    | Clostridia   | 0                  | 0                   | 0                  | 0                   |
| <b>seq958</b>  | Firmicutes    | Clostridia   | 0                  | 0                   | 0                  | 0                   |
| <b>seq959</b>  | Firmicutes    | Clostridia   | 0                  | 0                   | 0                  | 0                   |
| <b>seq960</b>  | Firmicutes    | Clostridia   | 0                  | 0                   | 0                  | 0                   |
| <b>seq961</b>  | Firmicutes    | Clostridia   | 0                  | 0                   | 0                  | 0                   |
| <b>seq964</b>  | Firmicutes    | Clostridia   | 13                 | 0                   | 0                  | 0                   |
| <b>seq970</b>  | Firmicutes    | Clostridia   | 0                  | 0                   | 0                  | 0                   |
| <b>seq981</b>  | Firmicutes    | Clostridia   | 0                  | 0                   | 0                  | 0                   |
| <b>seq982</b>  | Firmicutes    | Clostridia   | 0                  | 0                   | 0                  | 0                   |
| <b>seq983</b>  | Firmicutes    | Clostridia   | 0                  | 0                   | 0                  | 0                   |
| <b>seq990</b>  | Firmicutes    | Clostridia   | 0                  | 0                   | 0                  | 0                   |
| <b>seq1001</b> | Firmicutes    | Clostridia   | 0                  | 0                   | 0                  | 0                   |
| <b>seq1010</b> | Firmicutes    | Clostridia   | 0                  | 0                   | 0                  | 0                   |
| <b>seq1011</b> | Firmicutes    | Clostridia   | 0                  | 0                   | 0                  | 0                   |
| <b>seq1014</b> | Firmicutes    | Clostridia   | 0                  | 0                   | 0                  | 0                   |
| <b>seq1022</b> | Firmicutes    | Clostridia   | 0                  | 0                   | 0                  | 0                   |
| <b>seq1028</b> | Firmicutes    | Clostridia   | 0                  | 0                   | 0                  | 0                   |
| <b>seq1036</b> | Firmicutes    | Clostridia   | 0                  | 0                   | 0                  | 0                   |
| <b>seq1037</b> | Firmicutes    | Clostridia   | 0                  | 0                   | 0                  | 0                   |
| <b>seq1042</b> | Firmicutes    | Clostridia   | 0                  | 0                   | 32                 | 0                   |
| <b>seq1052</b> | Firmicutes    | Clostridia   | 0                  | 0                   | 0                  | 0                   |
| <b>seq1053</b> | Firmicutes    | Clostridia   | 0                  | 0                   | 0                  | 0                   |
| <b>seq1056</b> | Firmicutes    | Clostridia   | 0                  | 0                   | 75                 | 0                   |
| <b>seq1058</b> | Firmicutes    | Clostridia   | 0                  | 0                   | 0                  | 0                   |
| <b>seq1062</b> | Firmicutes    | Clostridia   | 0                  | 0                   | 0                  | 0                   |
| <b>seq1073</b> | Firmicutes    | Clostridia   | 0                  | 0                   | 0                  | 0                   |

Sequence Count Table

|                | <b>Phylum</b> | <b>Class</b> | <b>Subject4WK0</b> | <b>Subject4WK12</b> | <b>Subject5WK0</b> | <b>Subject5WK12</b> |
|----------------|---------------|--------------|--------------------|---------------------|--------------------|---------------------|
| <b>seq891</b>  | Firmicutes    | Clostridia   | 0                  | 202                 | 0                  | 0                   |
| <b>seq892</b>  | Firmicutes    | Clostridia   | 0                  | 0                   | 94                 | 0                   |
| <b>seq907</b>  | Firmicutes    | Clostridia   | 0                  | 0                   | 0                  | 0                   |
| <b>seq936</b>  | Firmicutes    | Clostridia   | 0                  | 0                   | 0                  | 0                   |
| <b>seq943</b>  | Firmicutes    | Clostridia   | 73                 | 0                   | 0                  | 0                   |
| <b>seq947</b>  | Firmicutes    | Clostridia   | 0                  | 0                   | 0                  | 0                   |
| <b>seq952</b>  | Firmicutes    | Clostridia   | 0                  | 0                   | 15                 | 0                   |
| <b>seq958</b>  | Firmicutes    | Clostridia   | 0                  | 0                   | 0                  | 0                   |
| <b>seq959</b>  | Firmicutes    | Clostridia   | 0                  | 0                   | 0                  | 0                   |
| <b>seq960</b>  | Firmicutes    | Clostridia   | 0                  | 0                   | 0                  | 0                   |
| <b>seq961</b>  | Firmicutes    | Clostridia   | 0                  | 0                   | 0                  | 0                   |
| <b>seq964</b>  | Firmicutes    | Clostridia   | 15                 | 0                   | 18                 | 35                  |
| <b>seq970</b>  | Firmicutes    | Clostridia   | 0                  | 0                   | 0                  | 0                   |
| <b>seq981</b>  | Firmicutes    | Clostridia   | 0                  | 0                   | 0                  | 0                   |
| <b>seq982</b>  | Firmicutes    | Clostridia   | 0                  | 0                   | 0                  | 18                  |
| <b>seq983</b>  | Firmicutes    | Clostridia   | 0                  | 0                   | 0                  | 0                   |
| <b>seq990</b>  | Firmicutes    | Clostridia   | 0                  | 0                   | 0                  | 0                   |
| <b>seq1001</b> | Firmicutes    | Clostridia   | 0                  | 0                   | 0                  | 0                   |
| <b>seq1010</b> | Firmicutes    | Clostridia   | 0                  | 0                   | 0                  | 0                   |
| <b>seq1011</b> | Firmicutes    | Clostridia   | 0                  | 0                   | 0                  | 0                   |
| <b>seq1014</b> | Firmicutes    | Clostridia   | 0                  | 0                   | 0                  | 0                   |
| <b>seq1022</b> | Firmicutes    | Clostridia   | 20                 | 98                  | 0                  | 0                   |
| <b>seq1028</b> | Firmicutes    | Clostridia   | 0                  | 0                   | 0                  | 0                   |
| <b>seq1036</b> | Firmicutes    | Clostridia   | 0                  | 0                   | 0                  | 0                   |
| <b>seq1037</b> | Firmicutes    | Clostridia   | 0                  | 0                   | 0                  | 0                   |
| <b>seq1042</b> | Firmicutes    | Clostridia   | 0                  | 0                   | 0                  | 0                   |
| <b>seq1052</b> | Firmicutes    | Clostridia   | 0                  | 0                   | 0                  | 0                   |
| <b>seq1053</b> | Firmicutes    | Clostridia   | 0                  | 0                   | 0                  | 0                   |
| <b>seq1056</b> | Firmicutes    | Clostridia   | 0                  | 0                   | 0                  | 16                  |
| <b>seq1058</b> | Firmicutes    | Clostridia   | 0                  | 0                   | 0                  | 0                   |
| <b>seq1062</b> | Firmicutes    | Clostridia   | 0                  | 0                   | 0                  | 0                   |
| <b>seq1073</b> | Firmicutes    | Clostridia   | 0                  | 0                   | 0                  | 0                   |

Sequence Count Table

|                | <b>Phylum</b> | <b>Class</b> | <b>Subject6WK0</b> | <b>Subject6WK12</b> | <b>Subject18WK0</b> | <b>Subject18WK12</b> |
|----------------|---------------|--------------|--------------------|---------------------|---------------------|----------------------|
| <b>seq891</b>  | Firmicutes    | Clostridia   | 0                  | 0                   | 0                   | 0                    |
| <b>seq892</b>  | Firmicutes    | Clostridia   | 0                  | 0                   | 0                   | 0                    |
| <b>seq907</b>  | Firmicutes    | Clostridia   | 0                  | 0                   | 0                   | 0                    |
| <b>seq936</b>  | Firmicutes    | Clostridia   | 0                  | 0                   | 0                   | 0                    |
| <b>seq943</b>  | Firmicutes    | Clostridia   | 0                  | 0                   | 0                   | 0                    |
| <b>seq947</b>  | Firmicutes    | Clostridia   | 0                  | 0                   | 0                   | 0                    |
| <b>seq952</b>  | Firmicutes    | Clostridia   | 0                  | 0                   | 46                  | 35                   |
| <b>seq958</b>  | Firmicutes    | Clostridia   | 0                  | 0                   | 0                   | 0                    |
| <b>seq959</b>  | Firmicutes    | Clostridia   | 0                  | 0                   | 76                  | 84                   |
| <b>seq960</b>  | Firmicutes    | Clostridia   | 0                  | 0                   | 0                   | 0                    |
| <b>seq961</b>  | Firmicutes    | Clostridia   | 0                  | 0                   | 0                   | 0                    |
| <b>seq964</b>  | Firmicutes    | Clostridia   | 0                  | 0                   | 0                   | 0                    |
| <b>seq970</b>  | Firmicutes    | Clostridia   | 0                  | 0                   | 0                   | 0                    |
| <b>seq981</b>  | Firmicutes    | Clostridia   | 0                  | 0                   | 0                   | 0                    |
| <b>seq982</b>  | Firmicutes    | Clostridia   | 0                  | 0                   | 0                   | 18                   |
| <b>seq983</b>  | Firmicutes    | Clostridia   | 0                  | 0                   | 0                   | 0                    |
| <b>seq990</b>  | Firmicutes    | Clostridia   | 0                  | 0                   | 0                   | 0                    |
| <b>seq1001</b> | Firmicutes    | Clostridia   | 62                 | 81                  | 0                   | 0                    |
| <b>seq1010</b> | Firmicutes    | Clostridia   | 0                  | 0                   | 0                   | 0                    |
| <b>seq1011</b> | Firmicutes    | Clostridia   | 0                  | 0                   | 0                   | 0                    |
| <b>seq1014</b> | Firmicutes    | Clostridia   | 0                  | 0                   | 0                   | 0                    |
| <b>seq1022</b> | Firmicutes    | Clostridia   | 17                 | 0                   | 0                   | 0                    |
| <b>seq1028</b> | Firmicutes    | Clostridia   | 0                  | 0                   | 0                   | 0                    |
| <b>seq1036</b> | Firmicutes    | Clostridia   | 0                  | 0                   | 0                   | 0                    |
| <b>seq1037</b> | Firmicutes    | Clostridia   | 0                  | 0                   | 0                   | 0                    |
| <b>seq1042</b> | Firmicutes    | Clostridia   | 0                  | 0                   | 0                   | 0                    |
| <b>seq1052</b> | Firmicutes    | Clostridia   | 0                  | 0                   | 0                   | 0                    |
| <b>seq1053</b> | Firmicutes    | Clostridia   | 0                  | 0                   | 0                   | 0                    |
| <b>seq1056</b> | Firmicutes    | Clostridia   | 0                  | 0                   | 0                   | 0                    |
| <b>seq1058</b> | Firmicutes    | Clostridia   | 0                  | 0                   | 0                   | 0                    |
| <b>seq1062</b> | Firmicutes    | Clostridia   | 0                  | 0                   | 0                   | 0                    |
| <b>seq1073</b> | Firmicutes    | Clostridia   | 0                  | 0                   | 0                   | 0                    |

Sequence Count Table

|                | <b>Phylum</b> | <b>Class</b> | <b>Subject19WK0</b> | <b>Subject19WK12</b> | <b>Subject20WK0</b> | <b>Subject20WK12</b> |
|----------------|---------------|--------------|---------------------|----------------------|---------------------|----------------------|
| <b>seq891</b>  | Firmicutes    | Clostridia   | 0                   | 0                    | 0                   | 0                    |
| <b>seq892</b>  | Firmicutes    | Clostridia   | 0                   | 0                    | 0                   | 0                    |
| <b>seq907</b>  | Firmicutes    | Clostridia   | 0                   | 0                    | 0                   | 0                    |
| <b>seq936</b>  | Firmicutes    | Clostridia   | 0                   | 0                    | 46                  | 59                   |
| <b>seq943</b>  | Firmicutes    | Clostridia   | 0                   | 0                    | 0                   | 0                    |
| <b>seq947</b>  | Firmicutes    | Clostridia   | 0                   | 0                    | 0                   | 0                    |
| <b>seq952</b>  | Firmicutes    | Clostridia   | 0                   | 0                    | 0                   | 0                    |
| <b>seq958</b>  | Firmicutes    | Clostridia   | 0                   | 0                    | 0                   | 0                    |
| <b>seq959</b>  | Firmicutes    | Clostridia   | 0                   | 0                    | 0                   | 0                    |
| <b>seq960</b>  | Firmicutes    | Clostridia   | 0                   | 0                    | 0                   | 0                    |
| <b>seq961</b>  | Firmicutes    | Clostridia   | 0                   | 0                    | 0                   | 159                  |
| <b>seq964</b>  | Firmicutes    | Clostridia   | 0                   | 0                    | 0                   | 0                    |
| <b>seq970</b>  | Firmicutes    | Clostridia   | 0                   | 0                    | 0                   | 0                    |
| <b>seq981</b>  | Firmicutes    | Clostridia   | 0                   | 0                    | 0                   | 0                    |
| <b>seq982</b>  | Firmicutes    | Clostridia   | 0                   | 0                    | 0                   | 0                    |
| <b>seq983</b>  | Firmicutes    | Clostridia   | 0                   | 0                    | 0                   | 0                    |
| <b>seq990</b>  | Firmicutes    | Clostridia   | 0                   | 146                  | 0                   | 0                    |
| <b>seq1001</b> | Firmicutes    | Clostridia   | 0                   | 0                    | 0                   | 0                    |
| <b>seq1010</b> | Firmicutes    | Clostridia   | 0                   | 0                    | 0                   | 0                    |
| <b>seq1011</b> | Firmicutes    | Clostridia   | 0                   | 0                    | 0                   | 0                    |
| <b>seq1014</b> | Firmicutes    | Clostridia   | 0                   | 0                    | 0                   | 0                    |
| <b>seq1022</b> | Firmicutes    | Clostridia   | 0                   | 0                    | 0                   | 0                    |
| <b>seq1028</b> | Firmicutes    | Clostridia   | 0                   | 0                    | 0                   | 0                    |
| <b>seq1036</b> | Firmicutes    | Clostridia   | 0                   | 0                    | 46                  | 83                   |
| <b>seq1037</b> | Firmicutes    | Clostridia   | 0                   | 0                    | 0                   | 0                    |
| <b>seq1042</b> | Firmicutes    | Clostridia   | 0                   | 0                    | 0                   | 0                    |
| <b>seq1052</b> | Firmicutes    | Clostridia   | 0                   | 0                    | 0                   | 0                    |
| <b>seq1053</b> | Firmicutes    | Clostridia   | 0                   | 0                    | 0                   | 0                    |
| <b>seq1056</b> | Firmicutes    | Clostridia   | 0                   | 0                    | 0                   | 0                    |
| <b>seq1058</b> | Firmicutes    | Clostridia   | 0                   | 0                    | 0                   | 0                    |
| <b>seq1062</b> | Firmicutes    | Clostridia   | 119                 | 0                    | 0                   | 0                    |
| <b>seq1073</b> | Firmicutes    | Clostridia   | 0                   | 0                    | 0                   | 0                    |



Sequence Count Table

|                | <b>Phylum</b> | <b>Class</b> | <b>Subject7WK0</b> | <b>Subject7WK12</b> | <b>Subject21WK0</b> | <b>Subject21WK12</b> |
|----------------|---------------|--------------|--------------------|---------------------|---------------------|----------------------|
| <b>seq891</b>  | Firmicutes    | Clostridia   | 0                  | 0                   | 0                   | 0                    |
| <b>seq892</b>  | Firmicutes    | Clostridia   | 0                  | 0                   | 0                   | 0                    |
| <b>seq907</b>  | Firmicutes    | Clostridia   | 0                  | 0                   | 0                   | 0                    |
| <b>seq936</b>  | Firmicutes    | Clostridia   | 0                  | 0                   | 0                   | 0                    |
| <b>seq943</b>  | Firmicutes    | Clostridia   | 0                  | 0                   | 0                   | 0                    |
| <b>seq947</b>  | Firmicutes    | Clostridia   | 0                  | 0                   | 0                   | 0                    |
| <b>seq952</b>  | Firmicutes    | Clostridia   | 0                  | 0                   | 0                   | 0                    |
| <b>seq958</b>  | Firmicutes    | Clostridia   | 0                  | 0                   | 0                   | 0                    |
| <b>seq959</b>  | Firmicutes    | Clostridia   | 0                  | 0                   | 0                   | 0                    |
| <b>seq960</b>  | Firmicutes    | Clostridia   | 0                  | 0                   | 0                   | 0                    |
| <b>seq961</b>  | Firmicutes    | Clostridia   | 0                  | 0                   | 0                   | 0                    |
| <b>seq964</b>  | Firmicutes    | Clostridia   | 0                  | 0                   | 0                   | 0                    |
| <b>seq970</b>  | Firmicutes    | Clostridia   | 0                  | 0                   | 0                   | 0                    |
| <b>seq981</b>  | Firmicutes    | Clostridia   | 0                  | 0                   | 0                   | 0                    |
| <b>seq982</b>  | Firmicutes    | Clostridia   | 0                  | 0                   | 0                   | 72                   |
| <b>seq983</b>  | Firmicutes    | Clostridia   | 0                  | 0                   | 65                  | 84                   |
| <b>seq990</b>  | Firmicutes    | Clostridia   | 0                  | 0                   | 0                   | 0                    |
| <b>seq1001</b> | Firmicutes    | Clostridia   | 0                  | 0                   | 0                   | 0                    |
| <b>seq1010</b> | Firmicutes    | Clostridia   | 0                  | 0                   | 0                   | 0                    |
| <b>seq1011</b> | Firmicutes    | Clostridia   | 0                  | 0                   | 0                   | 0                    |
| <b>seq1014</b> | Firmicutes    | Clostridia   | 0                  | 0                   | 0                   | 0                    |
| <b>seq1022</b> | Firmicutes    | Clostridia   | 0                  | 0                   | 0                   | 0                    |
| <b>seq1028</b> | Firmicutes    | Clostridia   | 0                  | 0                   | 0                   | 0                    |
| <b>seq1036</b> | Firmicutes    | Clostridia   | 0                  | 0                   | 0                   | 0                    |
| <b>seq1037</b> | Firmicutes    | Clostridia   | 0                  | 0                   | 0                   | 0                    |
| <b>seq1042</b> | Firmicutes    | Clostridia   | 0                  | 0                   | 0                   | 0                    |
| <b>seq1052</b> | Firmicutes    | Clostridia   | 0                  | 0                   | 0                   | 0                    |
| <b>seq1053</b> | Firmicutes    | Clostridia   | 0                  | 0                   | 0                   | 0                    |
| <b>seq1056</b> | Firmicutes    | Clostridia   | 0                  | 0                   | 0                   | 0                    |
| <b>seq1058</b> | Firmicutes    | Clostridia   | 0                  | 0                   | 0                   | 0                    |
| <b>seq1062</b> | Firmicutes    | Clostridia   | 0                  | 0                   | 0                   | 0                    |
| <b>seq1073</b> | Firmicutes    | Clostridia   | 0                  | 0                   | 114                 | 0                    |

Sequence Count Table

|                | <b>Phylum</b> | <b>Class</b> | <b>Subject8WK0</b> | <b>Subject8WK12</b> | <b>Subject9WK0</b> | <b>Subject9WK12</b> |
|----------------|---------------|--------------|--------------------|---------------------|--------------------|---------------------|
| <b>seq891</b>  | Firmicutes    | Clostridia   | 0                  | 0                   | 0                  | 0                   |
| <b>seq892</b>  | Firmicutes    | Clostridia   | 0                  | 0                   | 0                  | 0                   |
| <b>seq907</b>  | Firmicutes    | Clostridia   | 0                  | 0                   | 0                  | 0                   |
| <b>seq936</b>  | Firmicutes    | Clostridia   | 0                  | 0                   | 0                  | 0                   |
| <b>seq943</b>  | Firmicutes    | Clostridia   | 0                  | 0                   | 0                  | 0                   |
| <b>seq947</b>  | Firmicutes    | Clostridia   | 0                  | 0                   | 0                  | 0                   |
| <b>seq952</b>  | Firmicutes    | Clostridia   | 0                  | 0                   | 0                  | 20                  |
| <b>seq958</b>  | Firmicutes    | Clostridia   | 0                  | 0                   | 0                  | 0                   |
| <b>seq959</b>  | Firmicutes    | Clostridia   | 0                  | 0                   | 0                  | 0                   |
| <b>seq960</b>  | Firmicutes    | Clostridia   | 0                  | 0                   | 0                  | 0                   |
| <b>seq961</b>  | Firmicutes    | Clostridia   | 0                  | 0                   | 0                  | 0                   |
| <b>seq964</b>  | Firmicutes    | Clostridia   | 18                 | 8                   | 26                 | 0                   |
| <b>seq970</b>  | Firmicutes    | Clostridia   | 0                  | 0                   | 0                  | 0                   |
| <b>seq981</b>  | Firmicutes    | Clostridia   | 0                  | 0                   | 0                  | 0                   |
| <b>seq982</b>  | Firmicutes    | Clostridia   | 0                  | 0                   | 0                  | 0                   |
| <b>seq983</b>  | Firmicutes    | Clostridia   | 0                  | 0                   | 0                  | 0                   |
| <b>seq990</b>  | Firmicutes    | Clostridia   | 0                  | 0                   | 0                  | 0                   |
| <b>seq1001</b> | Firmicutes    | Clostridia   | 0                  | 0                   | 0                  | 0                   |
| <b>seq1010</b> | Firmicutes    | Clostridia   | 0                  | 0                   | 0                  | 0                   |
| <b>seq1011</b> | Firmicutes    | Clostridia   | 0                  | 0                   | 0                  | 0                   |
| <b>seq1014</b> | Firmicutes    | Clostridia   | 0                  | 0                   | 0                  | 0                   |
| <b>seq1022</b> | Firmicutes    | Clostridia   | 0                  | 0                   | 0                  | 0                   |
| <b>seq1028</b> | Firmicutes    | Clostridia   | 0                  | 0                   | 0                  | 0                   |
| <b>seq1036</b> | Firmicutes    | Clostridia   | 0                  | 0                   | 0                  | 0                   |
| <b>seq1037</b> | Firmicutes    | Clostridia   | 0                  | 0                   | 0                  | 0                   |
| <b>seq1042</b> | Firmicutes    | Clostridia   | 0                  | 0                   | 0                  | 0                   |
| <b>seq1052</b> | Firmicutes    | Clostridia   | 0                  | 0                   | 0                  | 0                   |
| <b>seq1053</b> | Firmicutes    | Clostridia   | 0                  | 0                   | 0                  | 0                   |
| <b>seq1056</b> | Firmicutes    | Clostridia   | 0                  | 0                   | 0                  | 0                   |
| <b>seq1058</b> | Firmicutes    | Clostridia   | 0                  | 0                   | 0                  | 0                   |
| <b>seq1062</b> | Firmicutes    | Clostridia   | 0                  | 0                   | 0                  | 0                   |
| <b>seq1073</b> | Firmicutes    | Clostridia   | 0                  | 0                   | 0                  | 0                   |

Sequence Count Table

|                | <b>Phylum</b> | <b>Class</b> | <b>Subject10WK0</b> | <b>Subject10WK12</b> | <b>Subject22WK0</b> | <b>Subject22WK12</b> |
|----------------|---------------|--------------|---------------------|----------------------|---------------------|----------------------|
| <b>seq891</b>  | Firmicutes    | Clostridia   | 0                   | 0                    | 0                   | 0                    |
| <b>seq892</b>  | Firmicutes    | Clostridia   | 0                   | 0                    | 0                   | 0                    |
| <b>seq907</b>  | Firmicutes    | Clostridia   | 0                   | 0                    | 0                   | 0                    |
| <b>seq936</b>  | Firmicutes    | Clostridia   | 0                   | 0                    | 0                   | 0                    |
| <b>seq943</b>  | Firmicutes    | Clostridia   | 0                   | 0                    | 0                   | 0                    |
| <b>seq947</b>  | Firmicutes    | Clostridia   | 86                  | 82                   | 0                   | 0                    |
| <b>seq952</b>  | Firmicutes    | Clostridia   | 23                  | 25                   | 0                   | 0                    |
| <b>seq958</b>  | Firmicutes    | Clostridia   | 0                   | 0                    | 0                   | 0                    |
| <b>seq959</b>  | Firmicutes    | Clostridia   | 0                   | 0                    | 0                   | 0                    |
| <b>seq960</b>  | Firmicutes    | Clostridia   | 0                   | 0                    | 0                   | 0                    |
| <b>seq961</b>  | Firmicutes    | Clostridia   | 0                   | 0                    | 0                   | 0                    |
| <b>seq964</b>  | Firmicutes    | Clostridia   | 0                   | 0                    | 0                   | 0                    |
| <b>seq970</b>  | Firmicutes    | Clostridia   | 83                  | 46                   | 0                   | 0                    |
| <b>seq981</b>  | Firmicutes    | Clostridia   | 0                   | 0                    | 0                   | 0                    |
| <b>seq982</b>  | Firmicutes    | Clostridia   | 0                   | 0                    | 0                   | 0                    |
| <b>seq983</b>  | Firmicutes    | Clostridia   | 0                   | 0                    | 0                   | 0                    |
| <b>seq990</b>  | Firmicutes    | Clostridia   | 0                   | 0                    | 0                   | 0                    |
| <b>seq1001</b> | Firmicutes    | Clostridia   | 0                   | 0                    | 0                   | 0                    |
| <b>seq1010</b> | Firmicutes    | Clostridia   | 118                 | 21                   | 0                   | 0                    |
| <b>seq1011</b> | Firmicutes    | Clostridia   | 0                   | 0                    | 0                   | 0                    |
| <b>seq1014</b> | Firmicutes    | Clostridia   | 0                   | 0                    | 89                  | 49                   |
| <b>seq1022</b> | Firmicutes    | Clostridia   | 0                   | 0                    | 0                   | 0                    |
| <b>seq1028</b> | Firmicutes    | Clostridia   | 0                   | 0                    | 81                  | 51                   |
| <b>seq1036</b> | Firmicutes    | Clostridia   | 0                   | 0                    | 0                   | 0                    |
| <b>seq1037</b> | Firmicutes    | Clostridia   | 95                  | 34                   | 0                   | 0                    |
| <b>seq1042</b> | Firmicutes    | Clostridia   | 0                   | 0                    | 0                   | 0                    |
| <b>seq1052</b> | Firmicutes    | Clostridia   | 0                   | 0                    | 49                  | 75                   |
| <b>seq1053</b> | Firmicutes    | Clostridia   | 0                   | 0                    | 0                   | 0                    |
| <b>seq1056</b> | Firmicutes    | Clostridia   | 0                   | 0                    | 0                   | 0                    |
| <b>seq1058</b> | Firmicutes    | Clostridia   | 0                   | 0                    | 0                   | 0                    |
| <b>seq1062</b> | Firmicutes    | Clostridia   | 0                   | 0                    | 0                   | 0                    |
| <b>seq1073</b> | Firmicutes    | Clostridia   | 0                   | 0                    | 0                   | 0                    |

Sequence Count Table

|                | <b>Phylum</b> | <b>Class</b> | <b>Subject23WK0</b> | <b>Subject23WK12</b> | <b>Subject24WK0</b> | <b>Subject24WK12</b> |
|----------------|---------------|--------------|---------------------|----------------------|---------------------|----------------------|
| <b>seq891</b>  | Firmicutes    | Clostridia   | 0                   | 0                    | 0                   | 0                    |
| <b>seq892</b>  | Firmicutes    | Clostridia   | 0                   | 108                  | 0                   | 0                    |
| <b>seq907</b>  | Firmicutes    | Clostridia   | 0                   | 0                    | 0                   | 0                    |
| <b>seq936</b>  | Firmicutes    | Clostridia   | 0                   | 0                    | 0                   | 0                    |
| <b>seq943</b>  | Firmicutes    | Clostridia   | 0                   | 0                    | 0                   | 0                    |
| <b>seq947</b>  | Firmicutes    | Clostridia   | 0                   | 0                    | 0                   | 0                    |
| <b>seq952</b>  | Firmicutes    | Clostridia   | 0                   | 0                    | 0                   | 0                    |
| <b>seq958</b>  | Firmicutes    | Clostridia   | 0                   | 0                    | 0                   | 0                    |
| <b>seq959</b>  | Firmicutes    | Clostridia   | 0                   | 0                    | 0                   | 0                    |
| <b>seq960</b>  | Firmicutes    | Clostridia   | 0                   | 0                    | 0                   | 0                    |
| <b>seq961</b>  | Firmicutes    | Clostridia   | 0                   | 0                    | 0                   | 0                    |
| <b>seq964</b>  | Firmicutes    | Clostridia   | 0                   | 0                    | 5                   | 5                    |
| <b>seq970</b>  | Firmicutes    | Clostridia   | 0                   | 0                    | 0                   | 0                    |
| <b>seq981</b>  | Firmicutes    | Clostridia   | 0                   | 0                    | 0                   | 0                    |
| <b>seq982</b>  | Firmicutes    | Clostridia   | 0                   | 0                    | 0                   | 0                    |
| <b>seq983</b>  | Firmicutes    | Clostridia   | 0                   | 0                    | 0                   | 0                    |
| <b>seq990</b>  | Firmicutes    | Clostridia   | 0                   | 0                    | 0                   | 0                    |
| <b>seq1001</b> | Firmicutes    | Clostridia   | 0                   | 0                    | 0                   | 0                    |
| <b>seq1010</b> | Firmicutes    | Clostridia   | 0                   | 0                    | 0                   | 0                    |
| <b>seq1011</b> | Firmicutes    | Clostridia   | 0                   | 0                    | 0                   | 0                    |
| <b>seq1014</b> | Firmicutes    | Clostridia   | 0                   | 0                    | 0                   | 0                    |
| <b>seq1022</b> | Firmicutes    | Clostridia   | 0                   | 0                    | 0                   | 0                    |
| <b>seq1028</b> | Firmicutes    | Clostridia   | 0                   | 0                    | 0                   | 0                    |
| <b>seq1036</b> | Firmicutes    | Clostridia   | 0                   | 0                    | 0                   | 0                    |
| <b>seq1037</b> | Firmicutes    | Clostridia   | 0                   | 0                    | 0                   | 0                    |
| <b>seq1042</b> | Firmicutes    | Clostridia   | 0                   | 0                    | 0                   | 0                    |
| <b>seq1052</b> | Firmicutes    | Clostridia   | 0                   | 0                    | 0                   | 0                    |
| <b>seq1053</b> | Firmicutes    | Clostridia   | 0                   | 0                    | 0                   | 0                    |
| <b>seq1056</b> | Firmicutes    | Clostridia   | 0                   | 0                    | 0                   | 0                    |
| <b>seq1058</b> | Firmicutes    | Clostridia   | 0                   | 0                    | 0                   | 0                    |
| <b>seq1062</b> | Firmicutes    | Clostridia   | 0                   | 0                    | 0                   | 0                    |
| <b>seq1073</b> | Firmicutes    | Clostridia   | 0                   | 0                    | 0                   | 0                    |

Sequence Count Table

|                | <b>Phylum</b> | <b>Class</b> | <b>Subject11WK0</b> | <b>Subject11WK12</b> | <b>Subject12WK0</b> | <b>Subject12WK12</b> |
|----------------|---------------|--------------|---------------------|----------------------|---------------------|----------------------|
| <b>seq891</b>  | Firmicutes    | Clostridia   | 0                   | 0                    | 0                   | 0                    |
| <b>seq892</b>  | Firmicutes    | Clostridia   | 0                   | 0                    | 0                   | 0                    |
| <b>seq907</b>  | Firmicutes    | Clostridia   | 0                   | 0                    | 66                  | 125                  |
| <b>seq936</b>  | Firmicutes    | Clostridia   | 0                   | 0                    | 0                   | 0                    |
| <b>seq943</b>  | Firmicutes    | Clostridia   | 0                   | 0                    | 0                   | 0                    |
| <b>seq947</b>  | Firmicutes    | Clostridia   | 0                   | 0                    | 0                   | 0                    |
| <b>seq952</b>  | Firmicutes    | Clostridia   | 0                   | 0                    | 0                   | 0                    |
| <b>seq958</b>  | Firmicutes    | Clostridia   | 0                   | 0                    | 0                   | 0                    |
| <b>seq959</b>  | Firmicutes    | Clostridia   | 0                   | 0                    | 0                   | 0                    |
| <b>seq960</b>  | Firmicutes    | Clostridia   | 0                   | 0                    | 0                   | 160                  |
| <b>seq961</b>  | Firmicutes    | Clostridia   | 0                   | 0                    | 0                   | 0                    |
| <b>seq964</b>  | Firmicutes    | Clostridia   | 0                   | 0                    | 0                   | 0                    |
| <b>seq970</b>  | Firmicutes    | Clostridia   | 26                  | 0                    | 0                   | 0                    |
| <b>seq981</b>  | Firmicutes    | Clostridia   | 0                   | 0                    | 0                   | 0                    |
| <b>seq982</b>  | Firmicutes    | Clostridia   | 0                   | 0                    | 0                   | 0                    |
| <b>seq983</b>  | Firmicutes    | Clostridia   | 0                   | 0                    | 0                   | 0                    |
| <b>seq990</b>  | Firmicutes    | Clostridia   | 0                   | 0                    | 0                   | 0                    |
| <b>seq1001</b> | Firmicutes    | Clostridia   | 0                   | 0                    | 0                   | 0                    |
| <b>seq1010</b> | Firmicutes    | Clostridia   | 0                   | 0                    | 0                   | 0                    |
| <b>seq1011</b> | Firmicutes    | Clostridia   | 0                   | 0                    | 0                   | 0                    |
| <b>seq1014</b> | Firmicutes    | Clostridia   | 0                   | 0                    | 0                   | 0                    |
| <b>seq1022</b> | Firmicutes    | Clostridia   | 0                   | 0                    | 0                   | 0                    |
| <b>seq1028</b> | Firmicutes    | Clostridia   | 0                   | 0                    | 0                   | 0                    |
| <b>seq1036</b> | Firmicutes    | Clostridia   | 0                   | 0                    | 0                   | 0                    |
| <b>seq1037</b> | Firmicutes    | Clostridia   | 0                   | 0                    | 0                   | 0                    |
| <b>seq1042</b> | Firmicutes    | Clostridia   | 0                   | 0                    | 0                   | 0                    |
| <b>seq1052</b> | Firmicutes    | Clostridia   | 0                   | 0                    | 0                   | 0                    |
| <b>seq1053</b> | Firmicutes    | Clostridia   | 0                   | 124                  | 0                   | 0                    |
| <b>seq1056</b> | Firmicutes    | Clostridia   | 0                   | 0                    | 0                   | 0                    |
| <b>seq1058</b> | Firmicutes    | Clostridia   | 0                   | 0                    | 0                   | 0                    |
| <b>seq1062</b> | Firmicutes    | Clostridia   | 0                   | 0                    | 0                   | 0                    |
| <b>seq1073</b> | Firmicutes    | Clostridia   | 0                   | 0                    | 0                   | 0                    |

Sequence Count Table

|                | <b>Phylum</b> | <b>Class</b> | <b>Subject25WK0</b> | <b>Subject25WK12</b> | <b>Subject38WK0</b> | <b>Subject38WK12</b> |
|----------------|---------------|--------------|---------------------|----------------------|---------------------|----------------------|
| <b>seq891</b>  | Firmicutes    | Clostridia   | 0                   | 0                    | 0                   | 0                    |
| <b>seq892</b>  | Firmicutes    | Clostridia   | 0                   | 0                    | 0                   | 0                    |
| <b>seq907</b>  | Firmicutes    | Clostridia   | 0                   | 0                    | 0                   | 0                    |
| <b>seq936</b>  | Firmicutes    | Clostridia   | 0                   | 0                    | 0                   | 0                    |
| <b>seq943</b>  | Firmicutes    | Clostridia   | 0                   | 0                    | 0                   | 0                    |
| <b>seq947</b>  | Firmicutes    | Clostridia   | 0                   | 0                    | 0                   | 0                    |
| <b>seq952</b>  | Firmicutes    | Clostridia   | 0                   | 0                    | 0                   | 0                    |
| <b>seq958</b>  | Firmicutes    | Clostridia   | 0                   | 0                    | 0                   | 0                    |
| <b>seq959</b>  | Firmicutes    | Clostridia   | 0                   | 0                    | 0                   | 0                    |
| <b>seq960</b>  | Firmicutes    | Clostridia   | 0                   | 0                    | 0                   | 0                    |
| <b>seq961</b>  | Firmicutes    | Clostridia   | 0                   | 0                    | 0                   | 0                    |
| <b>seq964</b>  | Firmicutes    | Clostridia   | 0                   | 0                    | 0                   | 0                    |
| <b>seq970</b>  | Firmicutes    | Clostridia   | 0                   | 0                    | 0                   | 0                    |
| <b>seq981</b>  | Firmicutes    | Clostridia   | 0                   | 0                    | 0                   | 0                    |
| <b>seq982</b>  | Firmicutes    | Clostridia   | 0                   | 0                    | 0                   | 0                    |
| <b>seq983</b>  | Firmicutes    | Clostridia   | 0                   | 0                    | 0                   | 0                    |
| <b>seq990</b>  | Firmicutes    | Clostridia   | 0                   | 0                    | 0                   | 0                    |
| <b>seq1001</b> | Firmicutes    | Clostridia   | 0                   | 0                    | 0                   | 0                    |
| <b>seq1010</b> | Firmicutes    | Clostridia   | 0                   | 0                    | 0                   | 0                    |
| <b>seq1011</b> | Firmicutes    | Clostridia   | 0                   | 0                    | 0                   | 0                    |
| <b>seq1014</b> | Firmicutes    | Clostridia   | 0                   | 0                    | 0                   | 0                    |
| <b>seq1022</b> | Firmicutes    | Clostridia   | 0                   | 0                    | 0                   | 0                    |
| <b>seq1028</b> | Firmicutes    | Clostridia   | 0                   | 0                    | 0                   | 0                    |
| <b>seq1036</b> | Firmicutes    | Clostridia   | 0                   | 0                    | 0                   | 0                    |
| <b>seq1037</b> | Firmicutes    | Clostridia   | 0                   | 0                    | 0                   | 0                    |
| <b>seq1042</b> | Firmicutes    | Clostridia   | 0                   | 0                    | 0                   | 0                    |
| <b>seq1052</b> | Firmicutes    | Clostridia   | 0                   | 0                    | 0                   | 0                    |
| <b>seq1053</b> | Firmicutes    | Clostridia   | 0                   | 0                    | 0                   | 0                    |
| <b>seq1056</b> | Firmicutes    | Clostridia   | 0                   | 0                    | 0                   | 0                    |
| <b>seq1058</b> | Firmicutes    | Clostridia   | 0                   | 0                    | 0                   | 0                    |
| <b>seq1062</b> | Firmicutes    | Clostridia   | 0                   | 0                    | 0                   | 0                    |
| <b>seq1073</b> | Firmicutes    | Clostridia   | 0                   | 0                    | 0                   | 0                    |

Sequence Count Table

|                | <b>Phylum</b> | <b>Class</b> | <b>Subject31WK0</b> | <b>Subject31WK12</b> | <b>Subject32WK0</b> | <b>Subject32WK12</b> |
|----------------|---------------|--------------|---------------------|----------------------|---------------------|----------------------|
| <b>seq891</b>  | Firmicutes    | Clostridia   | 0                   | 0                    | 0                   | 0                    |
| <b>seq892</b>  | Firmicutes    | Clostridia   | 0                   | 0                    | 0                   | 0                    |
| <b>seq907</b>  | Firmicutes    | Clostridia   | 0                   | 0                    | 0                   | 0                    |
| <b>seq936</b>  | Firmicutes    | Clostridia   | 0                   | 0                    | 0                   | 0                    |
| <b>seq943</b>  | Firmicutes    | Clostridia   | 0                   | 0                    | 0                   | 0                    |
| <b>seq947</b>  | Firmicutes    | Clostridia   | 0                   | 0                    | 0                   | 0                    |
| <b>seq952</b>  | Firmicutes    | Clostridia   | 0                   | 0                    | 0                   | 0                    |
| <b>seq958</b>  | Firmicutes    | Clostridia   | 0                   | 0                    | 0                   | 0                    |
| <b>seq959</b>  | Firmicutes    | Clostridia   | 0                   | 0                    | 0                   | 0                    |
| <b>seq960</b>  | Firmicutes    | Clostridia   | 0                   | 0                    | 0                   | 0                    |
| <b>seq961</b>  | Firmicutes    | Clostridia   | 0                   | 0                    | 0                   | 0                    |
| <b>seq964</b>  | Firmicutes    | Clostridia   | 0                   | 0                    | 0                   | 0                    |
| <b>seq970</b>  | Firmicutes    | Clostridia   | 0                   | 0                    | 0                   | 0                    |
| <b>seq981</b>  | Firmicutes    | Clostridia   | 0                   | 0                    | 0                   | 0                    |
| <b>seq982</b>  | Firmicutes    | Clostridia   | 0                   | 0                    | 0                   | 0                    |
| <b>seq983</b>  | Firmicutes    | Clostridia   | 0                   | 0                    | 0                   | 0                    |
| <b>seq990</b>  | Firmicutes    | Clostridia   | 0                   | 0                    | 0                   | 0                    |
| <b>seq1001</b> | Firmicutes    | Clostridia   | 0                   | 0                    | 0                   | 0                    |
| <b>seq1010</b> | Firmicutes    | Clostridia   | 0                   | 0                    | 0                   | 0                    |
| <b>seq1011</b> | Firmicutes    | Clostridia   | 0                   | 0                    | 13                  | 0                    |
| <b>seq1014</b> | Firmicutes    | Clostridia   | 0                   | 0                    | 0                   | 0                    |
| <b>seq1022</b> | Firmicutes    | Clostridia   | 0                   | 0                    | 0                   | 0                    |
| <b>seq1028</b> | Firmicutes    | Clostridia   | 0                   | 0                    | 0                   | 0                    |
| <b>seq1036</b> | Firmicutes    | Clostridia   | 0                   | 0                    | 0                   | 0                    |
| <b>seq1037</b> | Firmicutes    | Clostridia   | 0                   | 0                    | 0                   | 0                    |
| <b>seq1042</b> | Firmicutes    | Clostridia   | 0                   | 0                    | 0                   | 0                    |
| <b>seq1052</b> | Firmicutes    | Clostridia   | 0                   | 0                    | 0                   | 0                    |
| <b>seq1053</b> | Firmicutes    | Clostridia   | 0                   | 0                    | 0                   | 0                    |
| <b>seq1056</b> | Firmicutes    | Clostridia   | 0                   | 0                    | 0                   | 0                    |
| <b>seq1058</b> | Firmicutes    | Clostridia   | 0                   | 0                    | 0                   | 0                    |
| <b>seq1062</b> | Firmicutes    | Clostridia   | 0                   | 0                    | 0                   | 0                    |
| <b>seq1073</b> | Firmicutes    | Clostridia   | 0                   | 0                    | 0                   | 0                    |

Sequence Count Table

|                | <b>Phylum</b> | <b>Class</b> | <b>Subject13WK0</b> | <b>Subject13WK12</b> | <b>Subject39WK0</b> | <b>Subject39WK12</b> |
|----------------|---------------|--------------|---------------------|----------------------|---------------------|----------------------|
| <b>seq891</b>  | Firmicutes    | Clostridia   | 0                   | 0                    | 0                   | 0                    |
| <b>seq892</b>  | Firmicutes    | Clostridia   | 0                   | 0                    | 0                   | 0                    |
| <b>seq907</b>  | Firmicutes    | Clostridia   | 0                   | 0                    | 0                   | 0                    |
| <b>seq936</b>  | Firmicutes    | Clostridia   | 0                   | 0                    | 0                   | 0                    |
| <b>seq943</b>  | Firmicutes    | Clostridia   | 0                   | 96                   | 0                   | 0                    |
| <b>seq947</b>  | Firmicutes    | Clostridia   | 0                   | 0                    | 0                   | 0                    |
| <b>seq952</b>  | Firmicutes    | Clostridia   | 0                   | 0                    | 0                   | 0                    |
| <b>seq958</b>  | Firmicutes    | Clostridia   | 0                   | 0                    | 0                   | 0                    |
| <b>seq959</b>  | Firmicutes    | Clostridia   | 0                   | 0                    | 0                   | 0                    |
| <b>seq960</b>  | Firmicutes    | Clostridia   | 0                   | 0                    | 0                   | 0                    |
| <b>seq961</b>  | Firmicutes    | Clostridia   | 0                   | 0                    | 0                   | 0                    |
| <b>seq964</b>  | Firmicutes    | Clostridia   | 0                   | 7                    | 0                   | 0                    |
| <b>seq970</b>  | Firmicutes    | Clostridia   | 0                   | 0                    | 0                   | 0                    |
| <b>seq981</b>  | Firmicutes    | Clostridia   | 0                   | 0                    | 0                   | 0                    |
| <b>seq982</b>  | Firmicutes    | Clostridia   | 0                   | 0                    | 0                   | 0                    |
| <b>seq983</b>  | Firmicutes    | Clostridia   | 0                   | 0                    | 0                   | 0                    |
| <b>seq990</b>  | Firmicutes    | Clostridia   | 0                   | 0                    | 0                   | 0                    |
| <b>seq1001</b> | Firmicutes    | Clostridia   | 0                   | 0                    | 0                   | 0                    |
| <b>seq1010</b> | Firmicutes    | Clostridia   | 0                   | 0                    | 0                   | 0                    |
| <b>seq1011</b> | Firmicutes    | Clostridia   | 30                  | 96                   | 0                   | 0                    |
| <b>seq1014</b> | Firmicutes    | Clostridia   | 0                   | 0                    | 0                   | 0                    |
| <b>seq1022</b> | Firmicutes    | Clostridia   | 0                   | 0                    | 0                   | 0                    |
| <b>seq1028</b> | Firmicutes    | Clostridia   | 0                   | 0                    | 0                   | 0                    |
| <b>seq1036</b> | Firmicutes    | Clostridia   | 0                   | 0                    | 0                   | 0                    |
| <b>seq1037</b> | Firmicutes    | Clostridia   | 0                   | 0                    | 0                   | 0                    |
| <b>seq1042</b> | Firmicutes    | Clostridia   | 95                  | 0                    | 0                   | 0                    |
| <b>seq1052</b> | Firmicutes    | Clostridia   | 0                   | 0                    | 0                   | 0                    |
| <b>seq1053</b> | Firmicutes    | Clostridia   | 0                   | 0                    | 0                   | 0                    |
| <b>seq1056</b> | Firmicutes    | Clostridia   | 0                   | 0                    | 0                   | 0                    |
| <b>seq1058</b> | Firmicutes    | Clostridia   | 0                   | 0                    | 0                   | 0                    |
| <b>seq1062</b> | Firmicutes    | Clostridia   | 0                   | 0                    | 0                   | 0                    |
| <b>seq1073</b> | Firmicutes    | Clostridia   | 0                   | 0                    | 0                   | 0                    |



Sequence Count Table

|                | <b>Phylum</b> | <b>Class</b> | <b>Subject26WK0</b> | <b>Subject26WK12</b> | <b>Subject14WK0</b> | <b>Subject14WK12</b> |
|----------------|---------------|--------------|---------------------|----------------------|---------------------|----------------------|
| <b>seq891</b>  | Firmicutes    | Clostridia   | 0                   | 0                    | 0                   | 0                    |
| <b>seq892</b>  | Firmicutes    | Clostridia   | 0                   | 0                    | 0                   | 0                    |
| <b>seq907</b>  | Firmicutes    | Clostridia   | 0                   | 0                    | 0                   | 0                    |
| <b>seq936</b>  | Firmicutes    | Clostridia   | 0                   | 0                    | 40                  | 28                   |
| <b>seq943</b>  | Firmicutes    | Clostridia   | 0                   | 0                    | 0                   | 0                    |
| <b>seq947</b>  | Firmicutes    | Clostridia   | 0                   | 0                    | 0                   | 0                    |
| <b>seq952</b>  | Firmicutes    | Clostridia   | 0                   | 0                    | 0                   | 0                    |
| <b>seq958</b>  | Firmicutes    | Clostridia   | 0                   | 0                    | 0                   | 0                    |
| <b>seq959</b>  | Firmicutes    | Clostridia   | 0                   | 0                    | 0                   | 0                    |
| <b>seq960</b>  | Firmicutes    | Clostridia   | 0                   | 0                    | 0                   | 0                    |
| <b>seq961</b>  | Firmicutes    | Clostridia   | 0                   | 0                    | 0                   | 0                    |
| <b>seq964</b>  | Firmicutes    | Clostridia   | 0                   | 0                    | 0                   | 0                    |
| <b>seq970</b>  | Firmicutes    | Clostridia   | 0                   | 0                    | 0                   | 0                    |
| <b>seq981</b>  | Firmicutes    | Clostridia   | 0                   | 0                    | 0                   | 0                    |
| <b>seq982</b>  | Firmicutes    | Clostridia   | 25                  | 17                   | 0                   | 0                    |
| <b>seq983</b>  | Firmicutes    | Clostridia   | 0                   | 0                    | 0                   | 0                    |
| <b>seq990</b>  | Firmicutes    | Clostridia   | 0                   | 0                    | 0                   | 0                    |
| <b>seq1001</b> | Firmicutes    | Clostridia   | 0                   | 0                    | 0                   | 0                    |
| <b>seq1010</b> | Firmicutes    | Clostridia   | 0                   | 0                    | 0                   | 0                    |
| <b>seq1011</b> | Firmicutes    | Clostridia   | 0                   | 0                    | 0                   | 0                    |
| <b>seq1014</b> | Firmicutes    | Clostridia   | 0                   | 0                    | 0                   | 0                    |
| <b>seq1022</b> | Firmicutes    | Clostridia   | 0                   | 0                    | 0                   | 0                    |
| <b>seq1028</b> | Firmicutes    | Clostridia   | 0                   | 0                    | 0                   | 0                    |
| <b>seq1036</b> | Firmicutes    | Clostridia   | 0                   | 0                    | 0                   | 0                    |
| <b>seq1037</b> | Firmicutes    | Clostridia   | 0                   | 0                    | 0                   | 0                    |
| <b>seq1042</b> | Firmicutes    | Clostridia   | 0                   | 0                    | 0                   | 0                    |
| <b>seq1052</b> | Firmicutes    | Clostridia   | 0                   | 0                    | 0                   | 0                    |
| <b>seq1053</b> | Firmicutes    | Clostridia   | 0                   | 0                    | 0                   | 0                    |
| <b>seq1056</b> | Firmicutes    | Clostridia   | 0                   | 0                    | 0                   | 0                    |
| <b>seq1058</b> | Firmicutes    | Clostridia   | 0                   | 0                    | 0                   | 0                    |
| <b>seq1062</b> | Firmicutes    | Clostridia   | 0                   | 0                    | 0                   | 0                    |
| <b>seq1073</b> | Firmicutes    | Clostridia   | 0                   | 0                    | 0                   | 0                    |

Sequence Count Table

|                | <b>Phylum</b> | <b>Class</b> | <b>Subject27WK0</b> | <b>Subject27WK12</b> | <b>Subject15WK0</b> | <b>Subject15WK12</b> |
|----------------|---------------|--------------|---------------------|----------------------|---------------------|----------------------|
| <b>seq891</b>  | Firmicutes    | Clostridia   | 0                   | 0                    | 0                   | 0                    |
| <b>seq892</b>  | Firmicutes    | Clostridia   | 0                   | 0                    | 0                   | 0                    |
| <b>seq907</b>  | Firmicutes    | Clostridia   | 0                   | 0                    | 0                   | 0                    |
| <b>seq936</b>  | Firmicutes    | Clostridia   | 0                   | 0                    | 0                   | 0                    |
| <b>seq943</b>  | Firmicutes    | Clostridia   | 0                   | 0                    | 0                   | 0                    |
| <b>seq947</b>  | Firmicutes    | Clostridia   | 0                   | 0                    | 0                   | 0                    |
| <b>seq952</b>  | Firmicutes    | Clostridia   | 0                   | 0                    | 0                   | 0                    |
| <b>seq958</b>  | Firmicutes    | Clostridia   | 0                   | 0                    | 0                   | 0                    |
| <b>seq959</b>  | Firmicutes    | Clostridia   | 0                   | 0                    | 0                   | 0                    |
| <b>seq960</b>  | Firmicutes    | Clostridia   | 0                   | 0                    | 0                   | 0                    |
| <b>seq961</b>  | Firmicutes    | Clostridia   | 0                   | 0                    | 0                   | 0                    |
| <b>seq964</b>  | Firmicutes    | Clostridia   | 0                   | 0                    | 0                   | 0                    |
| <b>seq970</b>  | Firmicutes    | Clostridia   | 0                   | 0                    | 0                   | 0                    |
| <b>seq981</b>  | Firmicutes    | Clostridia   | 0                   | 0                    | 0                   | 0                    |
| <b>seq982</b>  | Firmicutes    | Clostridia   | 0                   | 0                    | 0                   | 0                    |
| <b>seq983</b>  | Firmicutes    | Clostridia   | 0                   | 0                    | 0                   | 0                    |
| <b>seq990</b>  | Firmicutes    | Clostridia   | 0                   | 0                    | 0                   | 0                    |
| <b>seq1001</b> | Firmicutes    | Clostridia   | 0                   | 0                    | 0                   | 0                    |
| <b>seq1010</b> | Firmicutes    | Clostridia   | 0                   | 0                    | 0                   | 0                    |
| <b>seq1011</b> | Firmicutes    | Clostridia   | 0                   | 0                    | 0                   | 0                    |
| <b>seq1014</b> | Firmicutes    | Clostridia   | 0                   | 0                    | 0                   | 0                    |
| <b>seq1022</b> | Firmicutes    | Clostridia   | 0                   | 0                    | 0                   | 0                    |
| <b>seq1028</b> | Firmicutes    | Clostridia   | 0                   | 0                    | 0                   | 0                    |
| <b>seq1036</b> | Firmicutes    | Clostridia   | 0                   | 0                    | 0                   | 0                    |
| <b>seq1037</b> | Firmicutes    | Clostridia   | 0                   | 0                    | 0                   | 0                    |
| <b>seq1042</b> | Firmicutes    | Clostridia   | 0                   | 0                    | 0                   | 0                    |
| <b>seq1052</b> | Firmicutes    | Clostridia   | 0                   | 0                    | 0                   | 0                    |
| <b>seq1053</b> | Firmicutes    | Clostridia   | 0                   | 0                    | 0                   | 0                    |
| <b>seq1056</b> | Firmicutes    | Clostridia   | 31                  | 0                    | 0                   | 0                    |
| <b>seq1058</b> | Firmicutes    | Clostridia   | 75                  | 47                   | 0                   | 0                    |
| <b>seq1062</b> | Firmicutes    | Clostridia   | 0                   | 0                    | 0                   | 0                    |
| <b>seq1073</b> | Firmicutes    | Clostridia   | 0                   | 0                    | 0                   | 0                    |

Sequence Count Table

|                | <b>Phylum</b> | <b>Class</b> | <b>Δ</b> |  |  |  |
|----------------|---------------|--------------|----------|--|--|--|
| <b>seq891</b>  | Firmicutes    | Clostridia   |          |  |  |  |
| <b>seq892</b>  | Firmicutes    | Clostridia   |          |  |  |  |
| <b>seq907</b>  | Firmicutes    | Clostridia   |          |  |  |  |
| <b>seq936</b>  | Firmicutes    | Clostridia   |          |  |  |  |
| <b>seq943</b>  | Firmicutes    | Clostridia   |          |  |  |  |
| <b>seq947</b>  | Firmicutes    | Clostridia   |          |  |  |  |
| <b>seq952</b>  | Firmicutes    | Clostridia   |          |  |  |  |
| <b>seq958</b>  | Firmicutes    | Clostridia   |          |  |  |  |
| <b>seq959</b>  | Firmicutes    | Clostridia   |          |  |  |  |
| <b>seq960</b>  | Firmicutes    | Clostridia   |          |  |  |  |
| <b>seq961</b>  | Firmicutes    | Clostridia   |          |  |  |  |
| <b>seq964</b>  | Firmicutes    | Clostridia   |          |  |  |  |
| <b>seq970</b>  | Firmicutes    | Clostridia   |          |  |  |  |
| <b>seq981</b>  | Firmicutes    | Clostridia   |          |  |  |  |
| <b>seq982</b>  | Firmicutes    | Clostridia   |          |  |  |  |
| <b>seq983</b>  | Firmicutes    | Clostridia   |          |  |  |  |
| <b>seq990</b>  | Firmicutes    | Clostridia   |          |  |  |  |
| <b>seq1001</b> | Firmicutes    | Clostridia   |          |  |  |  |
| <b>seq1010</b> | Firmicutes    | Clostridia   |          |  |  |  |
| <b>seq1011</b> | Firmicutes    | Clostridia   |          |  |  |  |
| <b>seq1014</b> | Firmicutes    | Clostridia   |          |  |  |  |
| <b>seq1022</b> | Firmicutes    | Clostridia   |          |  |  |  |
| <b>seq1028</b> | Firmicutes    | Clostridia   |          |  |  |  |
| <b>seq1036</b> | Firmicutes    | Clostridia   |          |  |  |  |
| <b>seq1037</b> | Firmicutes    | Clostridia   |          |  |  |  |
| <b>seq1042</b> | Firmicutes    | Clostridia   |          |  |  |  |
| <b>seq1052</b> | Firmicutes    | Clostridia   |          |  |  |  |
| <b>seq1053</b> | Firmicutes    | Clostridia   |          |  |  |  |
| <b>seq1056</b> | Firmicutes    | Clostridia   |          |  |  |  |
| <b>seq1058</b> | Firmicutes    | Clostridia   |          |  |  |  |
| <b>seq1062</b> | Firmicutes    | Clostridia   |          |  |  |  |
| <b>seq1073</b> | Firmicutes    | Clostridia   |          |  |  |  |

Sequence Count Table

|                | <b>Phylum</b> | <b>Class</b> | <b>Order</b>  | <b>Family</b>   |
|----------------|---------------|--------------|---------------|-----------------|
| <b>seq1075</b> | Firmicutes    | Clostridia   | Clostridiales | Lachnospiraceae |
| <b>seq1080</b> | Firmicutes    | Clostridia   | Clostridiales | Lachnospiraceae |
| <b>seq1084</b> | Firmicutes    | Clostridia   | Clostridiales | Lachnospiraceae |
| <b>seq1088</b> | Firmicutes    | Clostridia   | Clostridiales | Lachnospiraceae |
| <b>seq1091</b> | Firmicutes    | Clostridia   | Clostridiales | Lachnospiraceae |
| <b>seq1096</b> | Firmicutes    | Clostridia   | Clostridiales | Lachnospiraceae |
| <b>seq1098</b> | Firmicutes    | Clostridia   | Clostridiales | Lachnospiraceae |
| <b>seq1103</b> | Firmicutes    | Clostridia   | Clostridiales | Lachnospiraceae |
| <b>seq1110</b> | Firmicutes    | Clostridia   | Clostridiales | Lachnospiraceae |
| <b>seq1113</b> | Firmicutes    | Clostridia   | Clostridiales | Lachnospiraceae |
| <b>seq1119</b> | Firmicutes    | Clostridia   | Clostridiales | Lachnospiraceae |
| <b>seq1120</b> | Firmicutes    | Clostridia   | Clostridiales | Lachnospiraceae |
| <b>seq1121</b> | Firmicutes    | Clostridia   | Clostridiales | Lachnospiraceae |
| <b>seq1135</b> | Firmicutes    | Clostridia   | Clostridiales | Lachnospiraceae |
| <b>seq1139</b> | Firmicutes    | Clostridia   | Clostridiales | Lachnospiraceae |
| <b>seq1159</b> | Firmicutes    | Clostridia   | Clostridiales | Lachnospiraceae |
| <b>seq1163</b> | Firmicutes    | Clostridia   | Clostridiales | Lachnospiraceae |
| <b>seq1172</b> | Firmicutes    | Clostridia   | Clostridiales | Lachnospiraceae |
| <b>seq1177</b> | Firmicutes    | Clostridia   | Clostridiales | Lachnospiraceae |
| <b>seq1193</b> | Firmicutes    | Clostridia   | Clostridiales | Lachnospiraceae |
| <b>seq1196</b> | Firmicutes    | Clostridia   | Clostridiales | Lachnospiraceae |
| <b>seq1198</b> | Firmicutes    | Clostridia   | Clostridiales | Lachnospiraceae |
| <b>seq1210</b> | Firmicutes    | Clostridia   | Clostridiales | Lachnospiraceae |
| <b>seq1212</b> | Firmicutes    | Clostridia   | Clostridiales | Lachnospiraceae |
| <b>seq1231</b> | Firmicutes    | Clostridia   | Clostridiales | Lachnospiraceae |
| <b>seq1234</b> | Firmicutes    | Clostridia   | Clostridiales | Lachnospiraceae |
| <b>seq1235</b> | Firmicutes    | Clostridia   | Clostridiales | Lachnospiraceae |
| <b>seq1241</b> | Firmicutes    | Clostridia   | Clostridiales | Lachnospiraceae |
| <b>seq1248</b> | Firmicutes    | Clostridia   | Clostridiales | Lachnospiraceae |
| <b>seq1249</b> | Firmicutes    | Clostridia   | Clostridiales | Lachnospiraceae |
| <b>seq1250</b> | Firmicutes    | Clostridia   | Clostridiales | Lachnospiraceae |
| <b>seq1259</b> | Firmicutes    | Clostridia   | Clostridiales | Lachnospiraceae |

Sequence Count Table

|                | <b>Phylum</b> | <b>Class</b> | <b>Genus</b> | <b>Species</b> |
|----------------|---------------|--------------|--------------|----------------|
| <b>seq1075</b> | Firmicutes    | Clostridia   |              |                |
| <b>seq1080</b> | Firmicutes    | Clostridia   |              |                |
| <b>seq1084</b> | Firmicutes    | Clostridia   |              |                |
| <b>seq1088</b> | Firmicutes    | Clostridia   |              |                |
| <b>seq1091</b> | Firmicutes    | Clostridia   |              |                |
| <b>seq1096</b> | Firmicutes    | Clostridia   |              |                |
| <b>seq1098</b> | Firmicutes    | Clostridia   |              |                |
| <b>seq1103</b> | Firmicutes    | Clostridia   |              |                |
| <b>seq1110</b> | Firmicutes    | Clostridia   |              |                |
| <b>seq1113</b> | Firmicutes    | Clostridia   |              |                |
| <b>seq1119</b> | Firmicutes    | Clostridia   |              |                |
| <b>seq1120</b> | Firmicutes    | Clostridia   |              |                |
| <b>seq1121</b> | Firmicutes    | Clostridia   |              |                |
| <b>seq1135</b> | Firmicutes    | Clostridia   |              |                |
| <b>seq1139</b> | Firmicutes    | Clostridia   |              |                |
| <b>seq1159</b> | Firmicutes    | Clostridia   |              |                |
| <b>seq1163</b> | Firmicutes    | Clostridia   |              |                |
| <b>seq1172</b> | Firmicutes    | Clostridia   |              |                |
| <b>seq1177</b> | Firmicutes    | Clostridia   |              |                |
| <b>seq1193</b> | Firmicutes    | Clostridia   |              |                |
| <b>seq1196</b> | Firmicutes    | Clostridia   |              |                |
| <b>seq1198</b> | Firmicutes    | Clostridia   |              |                |
| <b>seq1210</b> | Firmicutes    | Clostridia   |              |                |
| <b>seq1212</b> | Firmicutes    | Clostridia   |              |                |
| <b>seq1231</b> | Firmicutes    | Clostridia   |              |                |
| <b>seq1234</b> | Firmicutes    | Clostridia   |              |                |
| <b>seq1235</b> | Firmicutes    | Clostridia   |              |                |
| <b>seq1241</b> | Firmicutes    | Clostridia   |              |                |
| <b>seq1248</b> | Firmicutes    | Clostridia   |              |                |
| <b>seq1249</b> | Firmicutes    | Clostridia   |              |                |
| <b>seq1250</b> | Firmicutes    | Clostridia   |              |                |
| <b>seq1259</b> | Firmicutes    | Clostridia   |              |                |

Sequence Count Table

|                | <b>Phylum</b> | <b>Class</b> | <b>Subject34WK0</b> | <b>Subject34WK12</b> | <b>Subject16WK0</b> | <b>Subject16WK12</b> |
|----------------|---------------|--------------|---------------------|----------------------|---------------------|----------------------|
| <b>seq1075</b> | Firmicutes    | Clostridia   | 0                   | 0                    | 0                   | 0                    |
| <b>seq1080</b> | Firmicutes    | Clostridia   | 0                   | 0                    | 0                   | 0                    |
| <b>seq1084</b> | Firmicutes    | Clostridia   | 0                   | 110                  | 0                   | 0                    |
| <b>seq1088</b> | Firmicutes    | Clostridia   | 0                   | 0                    | 0                   | 0                    |
| <b>seq1091</b> | Firmicutes    | Clostridia   | 0                   | 108                  | 0                   | 0                    |
| <b>seq1096</b> | Firmicutes    | Clostridia   | 0                   | 0                    | 0                   | 0                    |
| <b>seq1098</b> | Firmicutes    | Clostridia   | 0                   | 0                    | 0                   | 0                    |
| <b>seq1103</b> | Firmicutes    | Clostridia   | 0                   | 0                    | 0                   | 0                    |
| <b>seq1110</b> | Firmicutes    | Clostridia   | 0                   | 0                    | 0                   | 0                    |
| <b>seq1113</b> | Firmicutes    | Clostridia   | 0                   | 0                    | 0                   | 0                    |
| <b>seq1119</b> | Firmicutes    | Clostridia   | 0                   | 0                    | 0                   | 0                    |
| <b>seq1120</b> | Firmicutes    | Clostridia   | 0                   | 0                    | 0                   | 0                    |
| <b>seq1121</b> | Firmicutes    | Clostridia   | 0                   | 0                    | 0                   | 0                    |
| <b>seq1135</b> | Firmicutes    | Clostridia   | 0                   | 0                    | 0                   | 0                    |
| <b>seq1139</b> | Firmicutes    | Clostridia   | 0                   | 0                    | 0                   | 0                    |
| <b>seq1159</b> | Firmicutes    | Clostridia   | 0                   | 0                    | 0                   | 0                    |
| <b>seq1163</b> | Firmicutes    | Clostridia   | 0                   | 0                    | 0                   | 0                    |
| <b>seq1172</b> | Firmicutes    | Clostridia   | 0                   | 0                    | 0                   | 0                    |
| <b>seq1177</b> | Firmicutes    | Clostridia   | 0                   | 0                    | 0                   | 0                    |
| <b>seq1193</b> | Firmicutes    | Clostridia   | 0                   | 0                    | 0                   | 0                    |
| <b>seq1196</b> | Firmicutes    | Clostridia   | 0                   | 0                    | 0                   | 0                    |
| <b>seq1198</b> | Firmicutes    | Clostridia   | 0                   | 0                    | 0                   | 0                    |
| <b>seq1210</b> | Firmicutes    | Clostridia   | 0                   | 0                    | 0                   | 0                    |
| <b>seq1212</b> | Firmicutes    | Clostridia   | 0                   | 0                    | 0                   | 0                    |
| <b>seq1231</b> | Firmicutes    | Clostridia   | 0                   | 0                    | 36                  | 35                   |
| <b>seq1234</b> | Firmicutes    | Clostridia   | 0                   | 0                    | 0                   | 0                    |
| <b>seq1235</b> | Firmicutes    | Clostridia   | 0                   | 0                    | 0                   | 0                    |
| <b>seq1241</b> | Firmicutes    | Clostridia   | 0                   | 0                    | 0                   | 0                    |
| <b>seq1248</b> | Firmicutes    | Clostridia   | 0                   | 0                    | 0                   | 0                    |
| <b>seq1249</b> | Firmicutes    | Clostridia   | 0                   | 67                   | 0                   | 0                    |
| <b>seq1250</b> | Firmicutes    | Clostridia   | 0                   | 7                    | 0                   | 0                    |
| <b>seq1259</b> | Firmicutes    | Clostridia   | 0                   | 0                    | 0                   | 0                    |

Sequence Count Table

|                | <b>Phylum</b> | <b>Class</b> | <b>Subject17WK0</b> | <b>Subject17WK12</b> | <b>Subject1WK0</b> | <b>Subject1WK12</b> |
|----------------|---------------|--------------|---------------------|----------------------|--------------------|---------------------|
| <b>seq1075</b> | Firmicutes    | Clostridia   | 0                   | 0                    | 0                  | 0                   |
| <b>seq1080</b> | Firmicutes    | Clostridia   | 0                   | 0                    | 0                  | 0                   |
| <b>seq1084</b> | Firmicutes    | Clostridia   | 0                   | 0                    | 0                  | 0                   |
| <b>seq1088</b> | Firmicutes    | Clostridia   | 0                   | 0                    | 0                  | 0                   |
| <b>seq1091</b> | Firmicutes    | Clostridia   | 0                   | 0                    | 0                  | 0                   |
| <b>seq1096</b> | Firmicutes    | Clostridia   | 0                   | 0                    | 0                  | 0                   |
| <b>seq1098</b> | Firmicutes    | Clostridia   | 0                   | 0                    | 0                  | 0                   |
| <b>seq1103</b> | Firmicutes    | Clostridia   | 0                   | 0                    | 0                  | 0                   |
| <b>seq1110</b> | Firmicutes    | Clostridia   | 0                   | 0                    | 0                  | 0                   |
| <b>seq1113</b> | Firmicutes    | Clostridia   | 0                   | 0                    | 0                  | 0                   |
| <b>seq1119</b> | Firmicutes    | Clostridia   | 0                   | 0                    | 0                  | 0                   |
| <b>seq1120</b> | Firmicutes    | Clostridia   | 0                   | 0                    | 0                  | 0                   |
| <b>seq1121</b> | Firmicutes    | Clostridia   | 0                   | 0                    | 0                  | 0                   |
| <b>seq1135</b> | Firmicutes    | Clostridia   | 0                   | 0                    | 0                  | 0                   |
| <b>seq1139</b> | Firmicutes    | Clostridia   | 0                   | 0                    | 0                  | 0                   |
| <b>seq1159</b> | Firmicutes    | Clostridia   | 0                   | 0                    | 0                  | 0                   |
| <b>seq1163</b> | Firmicutes    | Clostridia   | 0                   | 0                    | 0                  | 0                   |
| <b>seq1172</b> | Firmicutes    | Clostridia   | 0                   | 0                    | 0                  | 0                   |
| <b>seq1177</b> | Firmicutes    | Clostridia   | 7                   | 18                   | 0                  | 0                   |
| <b>seq1193</b> | Firmicutes    | Clostridia   | 0                   | 0                    | 0                  | 0                   |
| <b>seq1196</b> | Firmicutes    | Clostridia   | 0                   | 0                    | 0                  | 0                   |
| <b>seq1198</b> | Firmicutes    | Clostridia   | 0                   | 0                    | 0                  | 0                   |
| <b>seq1210</b> | Firmicutes    | Clostridia   | 0                   | 77                   | 0                  | 0                   |
| <b>seq1212</b> | Firmicutes    | Clostridia   | 0                   | 0                    | 0                  | 0                   |
| <b>seq1231</b> | Firmicutes    | Clostridia   | 0                   | 0                    | 0                  | 0                   |
| <b>seq1234</b> | Firmicutes    | Clostridia   | 0                   | 0                    | 0                  | 0                   |
| <b>seq1235</b> | Firmicutes    | Clostridia   | 0                   | 0                    | 0                  | 0                   |
| <b>seq1241</b> | Firmicutes    | Clostridia   | 0                   | 0                    | 0                  | 0                   |
| <b>seq1248</b> | Firmicutes    | Clostridia   | 0                   | 0                    | 0                  | 0                   |
| <b>seq1249</b> | Firmicutes    | Clostridia   | 0                   | 0                    | 0                  | 0                   |
| <b>seq1250</b> | Firmicutes    | Clostridia   | 0                   | 0                    | 0                  | 0                   |
| <b>seq1259</b> | Firmicutes    | Clostridia   | 0                   | 0                    | 0                  | 0                   |

Sequence Count Table

|                | <b>Phylum</b> | <b>Class</b> | <b>Subject2WK0</b> | <b>Subject2WK12</b> | <b>Subject3WK0</b> | <b>Subject3WK12</b> |
|----------------|---------------|--------------|--------------------|---------------------|--------------------|---------------------|
| <b>seq1075</b> | Firmicutes    | Clostridia   | 0                  | 0                   | 0                  | 0                   |
| <b>seq1080</b> | Firmicutes    | Clostridia   | 0                  | 0                   | 0                  | 0                   |
| <b>seq1084</b> | Firmicutes    | Clostridia   | 0                  | 0                   | 0                  | 0                   |
| <b>seq1088</b> | Firmicutes    | Clostridia   | 0                  | 0                   | 0                  | 0                   |
| <b>seq1091</b> | Firmicutes    | Clostridia   | 0                  | 0                   | 0                  | 0                   |
| <b>seq1096</b> | Firmicutes    | Clostridia   | 0                  | 0                   | 0                  | 0                   |
| <b>seq1098</b> | Firmicutes    | Clostridia   | 0                  | 0                   | 0                  | 0                   |
| <b>seq1103</b> | Firmicutes    | Clostridia   | 0                  | 0                   | 0                  | 0                   |
| <b>seq1110</b> | Firmicutes    | Clostridia   | 0                  | 0                   | 86                 | 17                  |
| <b>seq1113</b> | Firmicutes    | Clostridia   | 0                  | 0                   | 0                  | 0                   |
| <b>seq1119</b> | Firmicutes    | Clostridia   | 0                  | 0                   | 0                  | 0                   |
| <b>seq1120</b> | Firmicutes    | Clostridia   | 37                 | 63                  | 0                  | 0                   |
| <b>seq1121</b> | Firmicutes    | Clostridia   | 0                  | 0                   | 0                  | 0                   |
| <b>seq1135</b> | Firmicutes    | Clostridia   | 0                  | 0                   | 0                  | 0                   |
| <b>seq1139</b> | Firmicutes    | Clostridia   | 0                  | 0                   | 0                  | 0                   |
| <b>seq1159</b> | Firmicutes    | Clostridia   | 0                  | 0                   | 44                 | 0                   |
| <b>seq1163</b> | Firmicutes    | Clostridia   | 0                  | 0                   | 0                  | 0                   |
| <b>seq1172</b> | Firmicutes    | Clostridia   | 0                  | 0                   | 0                  | 0                   |
| <b>seq1177</b> | Firmicutes    | Clostridia   | 0                  | 0                   | 0                  | 0                   |
| <b>seq1193</b> | Firmicutes    | Clostridia   | 0                  | 0                   | 0                  | 0                   |
| <b>seq1196</b> | Firmicutes    | Clostridia   | 0                  | 0                   | 0                  | 0                   |
| <b>seq1198</b> | Firmicutes    | Clostridia   | 0                  | 0                   | 0                  | 0                   |
| <b>seq1210</b> | Firmicutes    | Clostridia   | 0                  | 0                   | 0                  | 0                   |
| <b>seq1212</b> | Firmicutes    | Clostridia   | 0                  | 0                   | 0                  | 0                   |
| <b>seq1231</b> | Firmicutes    | Clostridia   | 0                  | 0                   | 0                  | 0                   |
| <b>seq1234</b> | Firmicutes    | Clostridia   | 0                  | 0                   | 0                  | 0                   |
| <b>seq1235</b> | Firmicutes    | Clostridia   | 0                  | 0                   | 0                  | 0                   |
| <b>seq1241</b> | Firmicutes    | Clostridia   | 0                  | 0                   | 0                  | 0                   |
| <b>seq1248</b> | Firmicutes    | Clostridia   | 0                  | 0                   | 0                  | 0                   |
| <b>seq1249</b> | Firmicutes    | Clostridia   | 0                  | 0                   | 0                  | 0                   |
| <b>seq1250</b> | Firmicutes    | Clostridia   | 0                  | 0                   | 0                  | 0                   |
| <b>seq1259</b> | Firmicutes    | Clostridia   | 0                  | 0                   | 0                  | 0                   |



Sequence Count Table

|                | <b>Phylum</b> | <b>Class</b> | <b>Subject4WK0</b> | <b>Subject4WK12</b> | <b>Subject5WK0</b> | <b>Subject5WK12</b> |
|----------------|---------------|--------------|--------------------|---------------------|--------------------|---------------------|
| <b>seq1075</b> | Firmicutes    | Clostridia   | 0                  | 0                   | 0                  | 0                   |
| <b>seq1080</b> | Firmicutes    | Clostridia   | 32                 | 47                  | 0                  | 0                   |
| <b>seq1084</b> | Firmicutes    | Clostridia   | 0                  | 0                   | 0                  | 0                   |
| <b>seq1088</b> | Firmicutes    | Clostridia   | 0                  | 0                   | 0                  | 0                   |
| <b>seq1091</b> | Firmicutes    | Clostridia   | 0                  | 0                   | 0                  | 0                   |
| <b>seq1096</b> | Firmicutes    | Clostridia   | 0                  | 0                   | 0                  | 0                   |
| <b>seq1098</b> | Firmicutes    | Clostridia   | 0                  | 0                   | 0                  | 0                   |
| <b>seq1103</b> | Firmicutes    | Clostridia   | 0                  | 0                   | 0                  | 0                   |
| <b>seq1110</b> | Firmicutes    | Clostridia   | 0                  | 0                   | 0                  | 0                   |
| <b>seq1113</b> | Firmicutes    | Clostridia   | 0                  | 0                   | 0                  | 0                   |
| <b>seq1119</b> | Firmicutes    | Clostridia   | 0                  | 0                   | 0                  | 0                   |
| <b>seq1120</b> | Firmicutes    | Clostridia   | 0                  | 0                   | 0                  | 0                   |
| <b>seq1121</b> | Firmicutes    | Clostridia   | 0                  | 0                   | 0                  | 0                   |
| <b>seq1135</b> | Firmicutes    | Clostridia   | 0                  | 0                   | 0                  | 0                   |
| <b>seq1139</b> | Firmicutes    | Clostridia   | 0                  | 0                   | 0                  | 0                   |
| <b>seq1159</b> | Firmicutes    | Clostridia   | 0                  | 0                   | 0                  | 0                   |
| <b>seq1163</b> | Firmicutes    | Clostridia   | 0                  | 0                   | 0                  | 0                   |
| <b>seq1172</b> | Firmicutes    | Clostridia   | 0                  | 0                   | 0                  | 0                   |
| <b>seq1177</b> | Firmicutes    | Clostridia   | 13                 | 0                   | 0                  | 0                   |
| <b>seq1193</b> | Firmicutes    | Clostridia   | 0                  | 0                   | 0                  | 0                   |
| <b>seq1196</b> | Firmicutes    | Clostridia   | 0                  | 0                   | 0                  | 0                   |
| <b>seq1198</b> | Firmicutes    | Clostridia   | 0                  | 0                   | 0                  | 0                   |
| <b>seq1210</b> | Firmicutes    | Clostridia   | 0                  | 0                   | 0                  | 0                   |
| <b>seq1212</b> | Firmicutes    | Clostridia   | 0                  | 0                   | 0                  | 0                   |
| <b>seq1231</b> | Firmicutes    | Clostridia   | 0                  | 0                   | 0                  | 0                   |
| <b>seq1234</b> | Firmicutes    | Clostridia   | 0                  | 0                   | 0                  | 0                   |
| <b>seq1235</b> | Firmicutes    | Clostridia   | 0                  | 0                   | 0                  | 0                   |
| <b>seq1241</b> | Firmicutes    | Clostridia   | 0                  | 0                   | 0                  | 0                   |
| <b>seq1248</b> | Firmicutes    | Clostridia   | 0                  | 0                   | 0                  | 0                   |
| <b>seq1249</b> | Firmicutes    | Clostridia   | 0                  | 0                   | 0                  | 0                   |
| <b>seq1250</b> | Firmicutes    | Clostridia   | 0                  | 0                   | 0                  | 26                  |
| <b>seq1259</b> | Firmicutes    | Clostridia   | 0                  | 0                   | 0                  | 0                   |

Sequence Count Table

|                | <b>Phylum</b> | <b>Class</b> | <b>Subject6WK0</b> | <b>Subject6WK12</b> | <b>Subject18WK0</b> | <b>Subject18WK12</b> |
|----------------|---------------|--------------|--------------------|---------------------|---------------------|----------------------|
| <b>seq1075</b> | Firmicutes    | Clostridia   | 0                  | 0                   | 0                   | 0                    |
| <b>seq1080</b> | Firmicutes    | Clostridia   | 0                  | 0                   | 0                   | 0                    |
| <b>seq1084</b> | Firmicutes    | Clostridia   | 0                  | 0                   | 0                   | 0                    |
| <b>seq1088</b> | Firmicutes    | Clostridia   | 0                  | 0                   | 0                   | 0                    |
| <b>seq1091</b> | Firmicutes    | Clostridia   | 0                  | 0                   | 0                   | 0                    |
| <b>seq1096</b> | Firmicutes    | Clostridia   | 0                  | 0                   | 0                   | 0                    |
| <b>seq1098</b> | Firmicutes    | Clostridia   | 0                  | 0                   | 0                   | 0                    |
| <b>seq1103</b> | Firmicutes    | Clostridia   | 0                  | 0                   | 0                   | 0                    |
| <b>seq1110</b> | Firmicutes    | Clostridia   | 0                  | 0                   | 0                   | 0                    |
| <b>seq1113</b> | Firmicutes    | Clostridia   | 0                  | 0                   | 0                   | 0                    |
| <b>seq1119</b> | Firmicutes    | Clostridia   | 0                  | 0                   | 0                   | 0                    |
| <b>seq1120</b> | Firmicutes    | Clostridia   | 0                  | 0                   | 0                   | 0                    |
| <b>seq1121</b> | Firmicutes    | Clostridia   | 32                 | 28                  | 0                   | 0                    |
| <b>seq1135</b> | Firmicutes    | Clostridia   | 0                  | 0                   | 0                   | 0                    |
| <b>seq1139</b> | Firmicutes    | Clostridia   | 0                  | 0                   | 0                   | 0                    |
| <b>seq1159</b> | Firmicutes    | Clostridia   | 0                  | 0                   | 13                  | 0                    |
| <b>seq1163</b> | Firmicutes    | Clostridia   | 0                  | 0                   | 0                   | 0                    |
| <b>seq1172</b> | Firmicutes    | Clostridia   | 0                  | 0                   | 0                   | 0                    |
| <b>seq1177</b> | Firmicutes    | Clostridia   | 0                  | 11                  | 0                   | 0                    |
| <b>seq1193</b> | Firmicutes    | Clostridia   | 0                  | 0                   | 0                   | 0                    |
| <b>seq1196</b> | Firmicutes    | Clostridia   | 0                  | 0                   | 0                   | 0                    |
| <b>seq1198</b> | Firmicutes    | Clostridia   | 0                  | 0                   | 0                   | 0                    |
| <b>seq1210</b> | Firmicutes    | Clostridia   | 0                  | 0                   | 0                   | 0                    |
| <b>seq1212</b> | Firmicutes    | Clostridia   | 0                  | 0                   | 0                   | 0                    |
| <b>seq1231</b> | Firmicutes    | Clostridia   | 0                  | 0                   | 0                   | 0                    |
| <b>seq1234</b> | Firmicutes    | Clostridia   | 0                  | 0                   | 0                   | 18                   |
| <b>seq1235</b> | Firmicutes    | Clostridia   | 0                  | 0                   | 0                   | 0                    |
| <b>seq1241</b> | Firmicutes    | Clostridia   | 0                  | 0                   | 0                   | 0                    |
| <b>seq1248</b> | Firmicutes    | Clostridia   | 0                  | 0                   | 0                   | 0                    |
| <b>seq1249</b> | Firmicutes    | Clostridia   | 0                  | 0                   | 0                   | 0                    |
| <b>seq1250</b> | Firmicutes    | Clostridia   | 0                  | 0                   | 0                   | 0                    |
| <b>seq1259</b> | Firmicutes    | Clostridia   | 0                  | 0                   | 0                   | 0                    |

Sequence Count Table

|                | <b>Phylum</b> | <b>Class</b> | <b>Subject19WK0</b> | <b>Subject19WK12</b> | <b>Subject20WK0</b> | <b>Subject20WK12</b> |
|----------------|---------------|--------------|---------------------|----------------------|---------------------|----------------------|
| <b>seq1075</b> | Firmicutes    | Clostridia   | 0                   | 0                    | 0                   | 0                    |
| <b>seq1080</b> | Firmicutes    | Clostridia   | 0                   | 0                    | 0                   | 0                    |
| <b>seq1084</b> | Firmicutes    | Clostridia   | 0                   | 0                    | 0                   | 0                    |
| <b>seq1088</b> | Firmicutes    | Clostridia   | 0                   | 0                    | 0                   | 0                    |
| <b>seq1091</b> | Firmicutes    | Clostridia   | 0                   | 0                    | 0                   | 0                    |
| <b>seq1096</b> | Firmicutes    | Clostridia   | 72                  | 35                   | 0                   | 0                    |
| <b>seq1098</b> | Firmicutes    | Clostridia   | 0                   | 0                    | 0                   | 0                    |
| <b>seq1103</b> | Firmicutes    | Clostridia   | 0                   | 0                    | 40                  | 64                   |
| <b>seq1110</b> | Firmicutes    | Clostridia   | 0                   | 0                    | 0                   | 0                    |
| <b>seq1113</b> | Firmicutes    | Clostridia   | 0                   | 0                    | 0                   | 0                    |
| <b>seq1119</b> | Firmicutes    | Clostridia   | 0                   | 0                    | 0                   | 0                    |
| <b>seq1120</b> | Firmicutes    | Clostridia   | 0                   | 0                    | 0                   | 0                    |
| <b>seq1121</b> | Firmicutes    | Clostridia   | 0                   | 0                    | 19                  | 0                    |
| <b>seq1135</b> | Firmicutes    | Clostridia   | 0                   | 0                    | 0                   | 0                    |
| <b>seq1139</b> | Firmicutes    | Clostridia   | 0                   | 0                    | 0                   | 0                    |
| <b>seq1159</b> | Firmicutes    | Clostridia   | 8                   | 0                    | 0                   | 0                    |
| <b>seq1163</b> | Firmicutes    | Clostridia   | 0                   | 0                    | 0                   | 0                    |
| <b>seq1172</b> | Firmicutes    | Clostridia   | 0                   | 0                    | 0                   | 0                    |
| <b>seq1177</b> | Firmicutes    | Clostridia   | 0                   | 0                    | 0                   | 0                    |
| <b>seq1193</b> | Firmicutes    | Clostridia   | 0                   | 0                    | 0                   | 0                    |
| <b>seq1196</b> | Firmicutes    | Clostridia   | 0                   | 81                   | 0                   | 0                    |
| <b>seq1198</b> | Firmicutes    | Clostridia   | 0                   | 0                    | 0                   | 0                    |
| <b>seq1210</b> | Firmicutes    | Clostridia   | 0                   | 0                    | 0                   | 0                    |
| <b>seq1212</b> | Firmicutes    | Clostridia   | 0                   | 0                    | 0                   | 0                    |
| <b>seq1231</b> | Firmicutes    | Clostridia   | 0                   | 0                    | 0                   | 0                    |
| <b>seq1234</b> | Firmicutes    | Clostridia   | 0                   | 0                    | 0                   | 0                    |
| <b>seq1235</b> | Firmicutes    | Clostridia   | 0                   | 71                   | 0                   | 0                    |
| <b>seq1241</b> | Firmicutes    | Clostridia   | 0                   | 0                    | 0                   | 0                    |
| <b>seq1248</b> | Firmicutes    | Clostridia   | 0                   | 0                    | 0                   | 0                    |
| <b>seq1249</b> | Firmicutes    | Clostridia   | 0                   | 0                    | 0                   | 0                    |
| <b>seq1250</b> | Firmicutes    | Clostridia   | 0                   | 0                    | 0                   | 0                    |
| <b>seq1259</b> | Firmicutes    | Clostridia   | 0                   | 0                    | 0                   | 0                    |

Sequence Count Table

|                | <b>Phylum</b> | <b>Class</b> | <b>Subject7WK0</b> | <b>Subject7WK12</b> | <b>Subject21WK0</b> | <b>Subject21WK12</b> |
|----------------|---------------|--------------|--------------------|---------------------|---------------------|----------------------|
| <b>seq1075</b> | Firmicutes    | Clostridia   | 0                  | 0                   | 0                   | 0                    |
| <b>seq1080</b> | Firmicutes    | Clostridia   | 0                  | 0                   | 0                   | 0                    |
| <b>seq1084</b> | Firmicutes    | Clostridia   | 0                  | 0                   | 0                   | 0                    |
| <b>seq1088</b> | Firmicutes    | Clostridia   | 0                  | 0                   | 0                   | 0                    |
| <b>seq1091</b> | Firmicutes    | Clostridia   | 0                  | 0                   | 0                   | 0                    |
| <b>seq1096</b> | Firmicutes    | Clostridia   | 0                  | 0                   | 0                   | 0                    |
| <b>seq1098</b> | Firmicutes    | Clostridia   | 0                  | 0                   | 0                   | 0                    |
| <b>seq1103</b> | Firmicutes    | Clostridia   | 0                  | 0                   | 0                   | 0                    |
| <b>seq1110</b> | Firmicutes    | Clostridia   | 0                  | 0                   | 0                   | 0                    |
| <b>seq1113</b> | Firmicutes    | Clostridia   | 0                  | 0                   | 0                   | 0                    |
| <b>seq1119</b> | Firmicutes    | Clostridia   | 0                  | 0                   | 0                   | 0                    |
| <b>seq1120</b> | Firmicutes    | Clostridia   | 0                  | 0                   | 0                   | 0                    |
| <b>seq1121</b> | Firmicutes    | Clostridia   | 0                  | 0                   | 0                   | 0                    |
| <b>seq1135</b> | Firmicutes    | Clostridia   | 43                 | 54                  | 0                   | 0                    |
| <b>seq1139</b> | Firmicutes    | Clostridia   | 0                  | 0                   | 0                   | 0                    |
| <b>seq1159</b> | Firmicutes    | Clostridia   | 0                  | 0                   | 0                   | 0                    |
| <b>seq1163</b> | Firmicutes    | Clostridia   | 0                  | 0                   | 0                   | 0                    |
| <b>seq1172</b> | Firmicutes    | Clostridia   | 0                  | 0                   | 0                   | 0                    |
| <b>seq1177</b> | Firmicutes    | Clostridia   | 0                  | 0                   | 0                   | 0                    |
| <b>seq1193</b> | Firmicutes    | Clostridia   | 0                  | 0                   | 0                   | 0                    |
| <b>seq1196</b> | Firmicutes    | Clostridia   | 0                  | 0                   | 0                   | 0                    |
| <b>seq1198</b> | Firmicutes    | Clostridia   | 0                  | 0                   | 0                   | 0                    |
| <b>seq1210</b> | Firmicutes    | Clostridia   | 0                  | 0                   | 0                   | 0                    |
| <b>seq1212</b> | Firmicutes    | Clostridia   | 0                  | 0                   | 0                   | 0                    |
| <b>seq1231</b> | Firmicutes    | Clostridia   | 0                  | 0                   | 0                   | 0                    |
| <b>seq1234</b> | Firmicutes    | Clostridia   | 0                  | 0                   | 53                  | 0                    |
| <b>seq1235</b> | Firmicutes    | Clostridia   | 0                  | 0                   | 0                   | 0                    |
| <b>seq1241</b> | Firmicutes    | Clostridia   | 12                 | 0                   | 0                   | 0                    |
| <b>seq1248</b> | Firmicutes    | Clostridia   | 0                  | 0                   | 0                   | 0                    |
| <b>seq1249</b> | Firmicutes    | Clostridia   | 0                  | 0                   | 0                   | 0                    |
| <b>seq1250</b> | Firmicutes    | Clostridia   | 0                  | 0                   | 0                   | 0                    |
| <b>seq1259</b> | Firmicutes    | Clostridia   | 0                  | 0                   | 0                   | 0                    |

Sequence Count Table

|                | <b>Phylum</b> | <b>Class</b> | <b>Subject8WK0</b> | <b>Subject8WK12</b> | <b>Subject9WK0</b> | <b>Subject9WK12</b> |
|----------------|---------------|--------------|--------------------|---------------------|--------------------|---------------------|
| <b>seq1075</b> | Firmicutes    | Clostridia   | 0                  | 0                   | 0                  | 0                   |
| <b>seq1080</b> | Firmicutes    | Clostridia   | 0                  | 0                   | 0                  | 0                   |
| <b>seq1084</b> | Firmicutes    | Clostridia   | 0                  | 0                   | 0                  | 0                   |
| <b>seq1088</b> | Firmicutes    | Clostridia   | 0                  | 0                   | 0                  | 0                   |
| <b>seq1091</b> | Firmicutes    | Clostridia   | 0                  | 0                   | 0                  | 0                   |
| <b>seq1096</b> | Firmicutes    | Clostridia   | 0                  | 0                   | 0                  | 0                   |
| <b>seq1098</b> | Firmicutes    | Clostridia   | 0                  | 0                   | 0                  | 0                   |
| <b>seq1103</b> | Firmicutes    | Clostridia   | 0                  | 0                   | 0                  | 0                   |
| <b>seq1110</b> | Firmicutes    | Clostridia   | 0                  | 0                   | 0                  | 0                   |
| <b>seq1113</b> | Firmicutes    | Clostridia   | 0                  | 0                   | 0                  | 0                   |
| <b>seq1119</b> | Firmicutes    | Clostridia   | 0                  | 0                   | 0                  | 0                   |
| <b>seq1120</b> | Firmicutes    | Clostridia   | 0                  | 0                   | 0                  | 0                   |
| <b>seq1121</b> | Firmicutes    | Clostridia   | 0                  | 0                   | 0                  | 0                   |
| <b>seq1135</b> | Firmicutes    | Clostridia   | 0                  | 0                   | 0                  | 0                   |
| <b>seq1139</b> | Firmicutes    | Clostridia   | 19                 | 0                   | 0                  | 0                   |
| <b>seq1159</b> | Firmicutes    | Clostridia   | 0                  | 0                   | 0                  | 0                   |
| <b>seq1163</b> | Firmicutes    | Clostridia   | 0                  | 0                   | 0                  | 0                   |
| <b>seq1172</b> | Firmicutes    | Clostridia   | 0                  | 0                   | 0                  | 0                   |
| <b>seq1177</b> | Firmicutes    | Clostridia   | 9                  | 28                  | 0                  | 0                   |
| <b>seq1193</b> | Firmicutes    | Clostridia   | 83                 | 0                   | 0                  | 0                   |
| <b>seq1196</b> | Firmicutes    | Clostridia   | 0                  | 0                   | 0                  | 0                   |
| <b>seq1198</b> | Firmicutes    | Clostridia   | 0                  | 0                   | 0                  | 0                   |
| <b>seq1210</b> | Firmicutes    | Clostridia   | 0                  | 0                   | 0                  | 0                   |
| <b>seq1212</b> | Firmicutes    | Clostridia   | 0                  | 0                   | 0                  | 0                   |
| <b>seq1231</b> | Firmicutes    | Clostridia   | 0                  | 0                   | 0                  | 0                   |
| <b>seq1234</b> | Firmicutes    | Clostridia   | 0                  | 0                   | 0                  | 0                   |
| <b>seq1235</b> | Firmicutes    | Clostridia   | 0                  | 0                   | 0                  | 0                   |
| <b>seq1241</b> | Firmicutes    | Clostridia   | 0                  | 0                   | 0                  | 0                   |
| <b>seq1248</b> | Firmicutes    | Clostridia   | 0                  | 0                   | 0                  | 0                   |
| <b>seq1249</b> | Firmicutes    | Clostridia   | 0                  | 0                   | 0                  | 0                   |
| <b>seq1250</b> | Firmicutes    | Clostridia   | 0                  | 0                   | 0                  | 0                   |
| <b>seq1259</b> | Firmicutes    | Clostridia   | 0                  | 0                   | 0                  | 0                   |

Sequence Count Table

|                | <b>Phylum</b> | <b>Class</b> | <b>Subject10WK0</b> | <b>Subject10WK12</b> | <b>Subject22WK0</b> | <b>Subject22WK12</b> |
|----------------|---------------|--------------|---------------------|----------------------|---------------------|----------------------|
| <b>seq1075</b> | Firmicutes    | Clostridia   | 0                   | 0                    | 0                   | 0                    |
| <b>seq1080</b> | Firmicutes    | Clostridia   | 0                   | 0                    | 19                  | 13                   |
| <b>seq1084</b> | Firmicutes    | Clostridia   | 0                   | 0                    | 0                   | 0                    |
| <b>seq1088</b> | Firmicutes    | Clostridia   | 0                   | 0                    | 75                  | 34                   |
| <b>seq1091</b> | Firmicutes    | Clostridia   | 0                   | 0                    | 0                   | 0                    |
| <b>seq1096</b> | Firmicutes    | Clostridia   | 0                   | 0                    | 0                   | 0                    |
| <b>seq1098</b> | Firmicutes    | Clostridia   | 0                   | 0                    | 0                   | 0                    |
| <b>seq1103</b> | Firmicutes    | Clostridia   | 0                   | 0                    | 0                   | 0                    |
| <b>seq1110</b> | Firmicutes    | Clostridia   | 0                   | 0                    | 0                   | 0                    |
| <b>seq1113</b> | Firmicutes    | Clostridia   | 0                   | 0                    | 0                   | 0                    |
| <b>seq1119</b> | Firmicutes    | Clostridia   | 0                   | 0                    | 0                   | 0                    |
| <b>seq1120</b> | Firmicutes    | Clostridia   | 0                   | 0                    | 0                   | 0                    |
| <b>seq1121</b> | Firmicutes    | Clostridia   | 0                   | 0                    | 0                   | 0                    |
| <b>seq1135</b> | Firmicutes    | Clostridia   | 0                   | 0                    | 0                   | 0                    |
| <b>seq1139</b> | Firmicutes    | Clostridia   | 0                   | 0                    | 0                   | 0                    |
| <b>seq1159</b> | Firmicutes    | Clostridia   | 12                  | 0                    | 0                   | 0                    |
| <b>seq1163</b> | Firmicutes    | Clostridia   | 0                   | 0                    | 0                   | 0                    |
| <b>seq1172</b> | Firmicutes    | Clostridia   | 0                   | 0                    | 25                  | 18                   |
| <b>seq1177</b> | Firmicutes    | Clostridia   | 0                   | 0                    | 0                   | 0                    |
| <b>seq1193</b> | Firmicutes    | Clostridia   | 0                   | 0                    | 0                   | 0                    |
| <b>seq1196</b> | Firmicutes    | Clostridia   | 0                   | 0                    | 0                   | 0                    |
| <b>seq1198</b> | Firmicutes    | Clostridia   | 0                   | 0                    | 0                   | 81                   |
| <b>seq1210</b> | Firmicutes    | Clostridia   | 0                   | 0                    | 0                   | 0                    |
| <b>seq1212</b> | Firmicutes    | Clostridia   | 0                   | 0                    | 0                   | 0                    |
| <b>seq1231</b> | Firmicutes    | Clostridia   | 0                   | 0                    | 0                   | 0                    |
| <b>seq1234</b> | Firmicutes    | Clostridia   | 0                   | 0                    | 0                   | 0                    |
| <b>seq1235</b> | Firmicutes    | Clostridia   | 0                   | 0                    | 0                   | 0                    |
| <b>seq1241</b> | Firmicutes    | Clostridia   | 0                   | 0                    | 0                   | 0                    |
| <b>seq1248</b> | Firmicutes    | Clostridia   | 0                   | 0                    | 0                   | 0                    |
| <b>seq1249</b> | Firmicutes    | Clostridia   | 0                   | 0                    | 0                   | 0                    |
| <b>seq1250</b> | Firmicutes    | Clostridia   | 0                   | 11                   | 0                   | 0                    |
| <b>seq1259</b> | Firmicutes    | Clostridia   | 0                   | 0                    | 0                   | 0                    |

Sequence Count Table

|                | <b>Phylum</b> | <b>Class</b> | <b>Subject23WK0</b> | <b>Subject23WK12</b> | <b>Subject24WK0</b> | <b>Subject24WK12</b> |
|----------------|---------------|--------------|---------------------|----------------------|---------------------|----------------------|
| <b>seq1075</b> | Firmicutes    | Clostridia   | 0                   | 0                    | 0                   | 0                    |
| <b>seq1080</b> | Firmicutes    | Clostridia   | 0                   | 0                    | 0                   | 0                    |
| <b>seq1084</b> | Firmicutes    | Clostridia   | 0                   | 0                    | 0                   | 0                    |
| <b>seq1088</b> | Firmicutes    | Clostridia   | 0                   | 0                    | 0                   | 0                    |
| <b>seq1091</b> | Firmicutes    | Clostridia   | 0                   | 0                    | 0                   | 0                    |
| <b>seq1096</b> | Firmicutes    | Clostridia   | 0                   | 0                    | 0                   | 0                    |
| <b>seq1098</b> | Firmicutes    | Clostridia   | 22                  | 84                   | 0                   | 0                    |
| <b>seq1103</b> | Firmicutes    | Clostridia   | 0                   | 0                    | 0                   | 0                    |
| <b>seq1110</b> | Firmicutes    | Clostridia   | 0                   | 0                    | 0                   | 0                    |
| <b>seq1113</b> | Firmicutes    | Clostridia   | 0                   | 0                    | 103                 | 0                    |
| <b>seq1119</b> | Firmicutes    | Clostridia   | 0                   | 0                    | 0                   | 0                    |
| <b>seq1120</b> | Firmicutes    | Clostridia   | 0                   | 0                    | 0                   | 0                    |
| <b>seq1121</b> | Firmicutes    | Clostridia   | 0                   | 0                    | 0                   | 0                    |
| <b>seq1135</b> | Firmicutes    | Clostridia   | 0                   | 0                    | 0                   | 0                    |
| <b>seq1139</b> | Firmicutes    | Clostridia   | 0                   | 0                    | 0                   | 0                    |
| <b>seq1159</b> | Firmicutes    | Clostridia   | 0                   | 0                    | 0                   | 0                    |
| <b>seq1163</b> | Firmicutes    | Clostridia   | 0                   | 0                    | 0                   | 0                    |
| <b>seq1172</b> | Firmicutes    | Clostridia   | 14                  | 0                    | 0                   | 0                    |
| <b>seq1177</b> | Firmicutes    | Clostridia   | 0                   | 0                    | 0                   | 0                    |
| <b>seq1193</b> | Firmicutes    | Clostridia   | 0                   | 0                    | 0                   | 0                    |
| <b>seq1196</b> | Firmicutes    | Clostridia   | 0                   | 0                    | 0                   | 0                    |
| <b>seq1198</b> | Firmicutes    | Clostridia   | 0                   | 0                    | 0                   | 0                    |
| <b>seq1210</b> | Firmicutes    | Clostridia   | 0                   | 0                    | 0                   | 0                    |
| <b>seq1212</b> | Firmicutes    | Clostridia   | 0                   | 0                    | 77                  | 0                    |
| <b>seq1231</b> | Firmicutes    | Clostridia   | 0                   | 0                    | 0                   | 0                    |
| <b>seq1234</b> | Firmicutes    | Clostridia   | 0                   | 0                    | 0                   | 0                    |
| <b>seq1235</b> | Firmicutes    | Clostridia   | 0                   | 0                    | 0                   | 0                    |
| <b>seq1241</b> | Firmicutes    | Clostridia   | 0                   | 0                    | 0                   | 0                    |
| <b>seq1248</b> | Firmicutes    | Clostridia   | 0                   | 0                    | 0                   | 0                    |
| <b>seq1249</b> | Firmicutes    | Clostridia   | 0                   | 0                    | 0                   | 0                    |
| <b>seq1250</b> | Firmicutes    | Clostridia   | 0                   | 0                    | 0                   | 0                    |
| <b>seq1259</b> | Firmicutes    | Clostridia   | 0                   | 0                    | 0                   | 0                    |

Sequence Count Table

|                | <b>Phylum</b> | <b>Class</b> | <b>Subject11WK0</b> | <b>Subject11WK12</b> | <b>Subject12WK0</b> | <b>Subject12WK12</b> |
|----------------|---------------|--------------|---------------------|----------------------|---------------------|----------------------|
| <b>seq1075</b> | Firmicutes    | Clostridia   | 0                   | 0                    | 0                   | 0                    |
| <b>seq1080</b> | Firmicutes    | Clostridia   | 0                   | 0                    | 0                   | 0                    |
| <b>seq1084</b> | Firmicutes    | Clostridia   | 0                   | 0                    | 0                   | 0                    |
| <b>seq1088</b> | Firmicutes    | Clostridia   | 0                   | 0                    | 0                   | 0                    |
| <b>seq1091</b> | Firmicutes    | Clostridia   | 0                   | 0                    | 0                   | 0                    |
| <b>seq1096</b> | Firmicutes    | Clostridia   | 0                   | 0                    | 0                   | 0                    |
| <b>seq1098</b> | Firmicutes    | Clostridia   | 0                   | 0                    | 0                   | 0                    |
| <b>seq1103</b> | Firmicutes    | Clostridia   | 0                   | 0                    | 0                   | 0                    |
| <b>seq1110</b> | Firmicutes    | Clostridia   | 0                   | 0                    | 0                   | 0                    |
| <b>seq1113</b> | Firmicutes    | Clostridia   | 0                   | 0                    | 0                   | 0                    |
| <b>seq1119</b> | Firmicutes    | Clostridia   | 0                   | 0                    | 0                   | 0                    |
| <b>seq1120</b> | Firmicutes    | Clostridia   | 0                   | 0                    | 0                   | 0                    |
| <b>seq1121</b> | Firmicutes    | Clostridia   | 0                   | 0                    | 0                   | 0                    |
| <b>seq1135</b> | Firmicutes    | Clostridia   | 0                   | 0                    | 0                   | 0                    |
| <b>seq1139</b> | Firmicutes    | Clostridia   | 0                   | 0                    | 0                   | 0                    |
| <b>seq1159</b> | Firmicutes    | Clostridia   | 13                  | 0                    | 0                   | 0                    |
| <b>seq1163</b> | Firmicutes    | Clostridia   | 0                   | 0                    | 0                   | 0                    |
| <b>seq1172</b> | Firmicutes    | Clostridia   | 0                   | 0                    | 0                   | 0                    |
| <b>seq1177</b> | Firmicutes    | Clostridia   | 0                   | 0                    | 0                   | 0                    |
| <b>seq1193</b> | Firmicutes    | Clostridia   | 0                   | 0                    | 0                   | 0                    |
| <b>seq1196</b> | Firmicutes    | Clostridia   | 0                   | 0                    | 0                   | 0                    |
| <b>seq1198</b> | Firmicutes    | Clostridia   | 0                   | 0                    | 0                   | 0                    |
| <b>seq1210</b> | Firmicutes    | Clostridia   | 0                   | 0                    | 0                   | 0                    |
| <b>seq1212</b> | Firmicutes    | Clostridia   | 0                   | 0                    | 0                   | 0                    |
| <b>seq1231</b> | Firmicutes    | Clostridia   | 0                   | 0                    | 0                   | 0                    |
| <b>seq1234</b> | Firmicutes    | Clostridia   | 0                   | 0                    | 0                   | 0                    |
| <b>seq1235</b> | Firmicutes    | Clostridia   | 0                   | 0                    | 0                   | 0                    |
| <b>seq1241</b> | Firmicutes    | Clostridia   | 0                   | 0                    | 0                   | 0                    |
| <b>seq1248</b> | Firmicutes    | Clostridia   | 0                   | 0                    | 0                   | 0                    |
| <b>seq1249</b> | Firmicutes    | Clostridia   | 0                   | 0                    | 0                   | 0                    |
| <b>seq1250</b> | Firmicutes    | Clostridia   | 0                   | 0                    | 0                   | 0                    |
| <b>seq1259</b> | Firmicutes    | Clostridia   | 0                   | 66                   | 0                   | 0                    |



Sequence Count Table

|                | <b>Phylum</b> | <b>Class</b> | <b>Subject25WK0</b> | <b>Subject25WK12</b> | <b>Subject38WK0</b> | <b>Subject38WK12</b> |
|----------------|---------------|--------------|---------------------|----------------------|---------------------|----------------------|
| <b>seq1075</b> | Firmicutes    | Clostridia   | 0                   | 0                    | 0                   | 0                    |
| <b>seq1080</b> | Firmicutes    | Clostridia   | 0                   | 0                    | 0                   | 0                    |
| <b>seq1084</b> | Firmicutes    | Clostridia   | 0                   | 0                    | 0                   | 0                    |
| <b>seq1088</b> | Firmicutes    | Clostridia   | 0                   | 0                    | 0                   | 0                    |
| <b>seq1091</b> | Firmicutes    | Clostridia   | 0                   | 0                    | 0                   | 0                    |
| <b>seq1096</b> | Firmicutes    | Clostridia   | 0                   | 0                    | 0                   | 0                    |
| <b>seq1098</b> | Firmicutes    | Clostridia   | 0                   | 0                    | 0                   | 0                    |
| <b>seq1103</b> | Firmicutes    | Clostridia   | 0                   | 0                    | 0                   | 0                    |
| <b>seq1110</b> | Firmicutes    | Clostridia   | 0                   | 0                    | 0                   | 0                    |
| <b>seq1113</b> | Firmicutes    | Clostridia   | 0                   | 0                    | 0                   | 0                    |
| <b>seq1119</b> | Firmicutes    | Clostridia   | 0                   | 0                    | 0                   | 0                    |
| <b>seq1120</b> | Firmicutes    | Clostridia   | 0                   | 0                    | 0                   | 0                    |
| <b>seq1121</b> | Firmicutes    | Clostridia   | 0                   | 0                    | 0                   | 0                    |
| <b>seq1135</b> | Firmicutes    | Clostridia   | 0                   | 0                    | 0                   | 0                    |
| <b>seq1139</b> | Firmicutes    | Clostridia   | 0                   | 0                    | 0                   | 0                    |
| <b>seq1159</b> | Firmicutes    | Clostridia   | 0                   | 0                    | 0                   | 0                    |
| <b>seq1163</b> | Firmicutes    | Clostridia   | 0                   | 0                    | 0                   | 0                    |
| <b>seq1172</b> | Firmicutes    | Clostridia   | 0                   | 0                    | 0                   | 0                    |
| <b>seq1177</b> | Firmicutes    | Clostridia   | 0                   | 0                    | 0                   | 0                    |
| <b>seq1193</b> | Firmicutes    | Clostridia   | 0                   | 0                    | 0                   | 0                    |
| <b>seq1196</b> | Firmicutes    | Clostridia   | 0                   | 0                    | 0                   | 0                    |
| <b>seq1198</b> | Firmicutes    | Clostridia   | 0                   | 0                    | 0                   | 0                    |
| <b>seq1210</b> | Firmicutes    | Clostridia   | 0                   | 0                    | 0                   | 0                    |
| <b>seq1212</b> | Firmicutes    | Clostridia   | 0                   | 0                    | 0                   | 0                    |
| <b>seq1231</b> | Firmicutes    | Clostridia   | 0                   | 0                    | 0                   | 0                    |
| <b>seq1234</b> | Firmicutes    | Clostridia   | 0                   | 0                    | 0                   | 0                    |
| <b>seq1235</b> | Firmicutes    | Clostridia   | 0                   | 0                    | 0                   | 0                    |
| <b>seq1241</b> | Firmicutes    | Clostridia   | 35                  | 0                    | 0                   | 0                    |
| <b>seq1248</b> | Firmicutes    | Clostridia   | 0                   | 0                    | 0                   | 0                    |
| <b>seq1249</b> | Firmicutes    | Clostridia   | 0                   | 0                    | 0                   | 0                    |
| <b>seq1250</b> | Firmicutes    | Clostridia   | 7                   | 0                    | 0                   | 0                    |
| <b>seq1259</b> | Firmicutes    | Clostridia   | 0                   | 0                    | 0                   | 0                    |

Sequence Count Table

|                | <b>Phylum</b> | <b>Class</b> | <b>Subject31WK0</b> | <b>Subject31WK12</b> | <b>Subject32WK0</b> | <b>Subject32WK12</b> |
|----------------|---------------|--------------|---------------------|----------------------|---------------------|----------------------|
| <b>seq1075</b> | Firmicutes    | Clostridia   | 0                   | 0                    | 114                 | 0                    |
| <b>seq1080</b> | Firmicutes    | Clostridia   | 0                   | 0                    | 0                   | 0                    |
| <b>seq1084</b> | Firmicutes    | Clostridia   | 0                   | 0                    | 0                   | 0                    |
| <b>seq1088</b> | Firmicutes    | Clostridia   | 0                   | 0                    | 0                   | 0                    |
| <b>seq1091</b> | Firmicutes    | Clostridia   | 0                   | 0                    | 0                   | 0                    |
| <b>seq1096</b> | Firmicutes    | Clostridia   | 0                   | 0                    | 0                   | 0                    |
| <b>seq1098</b> | Firmicutes    | Clostridia   | 0                   | 0                    | 0                   | 0                    |
| <b>seq1103</b> | Firmicutes    | Clostridia   | 0                   | 0                    | 0                   | 0                    |
| <b>seq1110</b> | Firmicutes    | Clostridia   | 0                   | 0                    | 0                   | 0                    |
| <b>seq1113</b> | Firmicutes    | Clostridia   | 0                   | 0                    | 0                   | 0                    |
| <b>seq1119</b> | Firmicutes    | Clostridia   | 0                   | 0                    | 0                   | 0                    |
| <b>seq1120</b> | Firmicutes    | Clostridia   | 0                   | 0                    | 0                   | 0                    |
| <b>seq1121</b> | Firmicutes    | Clostridia   | 0                   | 0                    | 0                   | 0                    |
| <b>seq1135</b> | Firmicutes    | Clostridia   | 0                   | 0                    | 0                   | 0                    |
| <b>seq1139</b> | Firmicutes    | Clostridia   | 0                   | 0                    | 0                   | 0                    |
| <b>seq1159</b> | Firmicutes    | Clostridia   | 0                   | 0                    | 0                   | 0                    |
| <b>seq1163</b> | Firmicutes    | Clostridia   | 0                   | 0                    | 0                   | 0                    |
| <b>seq1172</b> | Firmicutes    | Clostridia   | 0                   | 0                    | 0                   | 0                    |
| <b>seq1177</b> | Firmicutes    | Clostridia   | 0                   | 0                    | 0                   | 0                    |
| <b>seq1193</b> | Firmicutes    | Clostridia   | 0                   | 0                    | 0                   | 0                    |
| <b>seq1196</b> | Firmicutes    | Clostridia   | 0                   | 0                    | 0                   | 0                    |
| <b>seq1198</b> | Firmicutes    | Clostridia   | 0                   | 0                    | 0                   | 0                    |
| <b>seq1210</b> | Firmicutes    | Clostridia   | 0                   | 0                    | 0                   | 0                    |
| <b>seq1212</b> | Firmicutes    | Clostridia   | 0                   | 0                    | 0                   | 0                    |
| <b>seq1231</b> | Firmicutes    | Clostridia   | 0                   | 0                    | 0                   | 0                    |
| <b>seq1234</b> | Firmicutes    | Clostridia   | 0                   | 0                    | 0                   | 0                    |
| <b>seq1235</b> | Firmicutes    | Clostridia   | 0                   | 0                    | 0                   | 0                    |
| <b>seq1241</b> | Firmicutes    | Clostridia   | 0                   | 0                    | 0                   | 0                    |
| <b>seq1248</b> | Firmicutes    | Clostridia   | 0                   | 0                    | 0                   | 0                    |
| <b>seq1249</b> | Firmicutes    | Clostridia   | 0                   | 0                    | 0                   | 0                    |
| <b>seq1250</b> | Firmicutes    | Clostridia   | 0                   | 0                    | 0                   | 0                    |
| <b>seq1259</b> | Firmicutes    | Clostridia   | 0                   | 0                    | 0                   | 0                    |

Sequence Count Table

|                | <b>Phylum</b> | <b>Class</b> | <b>Subject13WK0</b> | <b>Subject13WK12</b> | <b>Subject39WK0</b> | <b>Subject39WK12</b> |
|----------------|---------------|--------------|---------------------|----------------------|---------------------|----------------------|
| <b>seq1075</b> | Firmicutes    | Clostridia   | 0                   | 0                    | 0                   | 0                    |
| <b>seq1080</b> | Firmicutes    | Clostridia   | 0                   | 0                    | 0                   | 0                    |
| <b>seq1084</b> | Firmicutes    | Clostridia   | 0                   | 0                    | 0                   | 0                    |
| <b>seq1088</b> | Firmicutes    | Clostridia   | 0                   | 0                    | 0                   | 0                    |
| <b>seq1091</b> | Firmicutes    | Clostridia   | 0                   | 0                    | 0                   | 0                    |
| <b>seq1096</b> | Firmicutes    | Clostridia   | 0                   | 0                    | 0                   | 0                    |
| <b>seq1098</b> | Firmicutes    | Clostridia   | 0                   | 0                    | 0                   | 0                    |
| <b>seq1103</b> | Firmicutes    | Clostridia   | 0                   | 0                    | 0                   | 0                    |
| <b>seq1110</b> | Firmicutes    | Clostridia   | 0                   | 0                    | 0                   | 0                    |
| <b>seq1113</b> | Firmicutes    | Clostridia   | 0                   | 0                    | 0                   | 0                    |
| <b>seq1119</b> | Firmicutes    | Clostridia   | 0                   | 0                    | 0                   | 101                  |
| <b>seq1120</b> | Firmicutes    | Clostridia   | 0                   | 0                    | 0                   | 0                    |
| <b>seq1121</b> | Firmicutes    | Clostridia   | 0                   | 0                    | 0                   | 0                    |
| <b>seq1135</b> | Firmicutes    | Clostridia   | 0                   | 0                    | 0                   | 0                    |
| <b>seq1139</b> | Firmicutes    | Clostridia   | 0                   | 0                    | 0                   | 0                    |
| <b>seq1159</b> | Firmicutes    | Clostridia   | 0                   | 0                    | 0                   | 0                    |
| <b>seq1163</b> | Firmicutes    | Clostridia   | 0                   | 90                   | 0                   | 0                    |
| <b>seq1172</b> | Firmicutes    | Clostridia   | 0                   | 0                    | 0                   | 0                    |
| <b>seq1177</b> | Firmicutes    | Clostridia   | 0                   | 0                    | 0                   | 0                    |
| <b>seq1193</b> | Firmicutes    | Clostridia   | 0                   | 0                    | 0                   | 0                    |
| <b>seq1196</b> | Firmicutes    | Clostridia   | 0                   | 0                    | 0                   | 0                    |
| <b>seq1198</b> | Firmicutes    | Clostridia   | 0                   | 0                    | 0                   | 0                    |
| <b>seq1210</b> | Firmicutes    | Clostridia   | 0                   | 0                    | 0                   | 0                    |
| <b>seq1212</b> | Firmicutes    | Clostridia   | 0                   | 0                    | 0                   | 0                    |
| <b>seq1231</b> | Firmicutes    | Clostridia   | 0                   | 0                    | 0                   | 0                    |
| <b>seq1234</b> | Firmicutes    | Clostridia   | 0                   | 0                    | 0                   | 0                    |
| <b>seq1235</b> | Firmicutes    | Clostridia   | 0                   | 0                    | 0                   | 0                    |
| <b>seq1241</b> | Firmicutes    | Clostridia   | 11                  | 0                    | 0                   | 11                   |
| <b>seq1248</b> | Firmicutes    | Clostridia   | 0                   | 0                    | 0                   | 0                    |
| <b>seq1249</b> | Firmicutes    | Clostridia   | 0                   | 0                    | 0                   | 0                    |
| <b>seq1250</b> | Firmicutes    | Clostridia   | 0                   | 0                    | 0                   | 0                    |
| <b>seq1259</b> | Firmicutes    | Clostridia   | 0                   | 0                    | 0                   | 0                    |

Sequence Count Table

|                | <b>Phylum</b> | <b>Class</b> | <b>Subject26WK0</b> | <b>Subject26WK12</b> | <b>Subject14WK0</b> | <b>Subject14WK12</b> |
|----------------|---------------|--------------|---------------------|----------------------|---------------------|----------------------|
| <b>seq1075</b> | Firmicutes    | Clostridia   | 0                   | 0                    | 0                   | 0                    |
| <b>seq1080</b> | Firmicutes    | Clostridia   | 0                   | 0                    | 0                   | 0                    |
| <b>seq1084</b> | Firmicutes    | Clostridia   | 0                   | 0                    | 0                   | 0                    |
| <b>seq1088</b> | Firmicutes    | Clostridia   | 0                   | 0                    | 0                   | 0                    |
| <b>seq1091</b> | Firmicutes    | Clostridia   | 0                   | 0                    | 0                   | 0                    |
| <b>seq1096</b> | Firmicutes    | Clostridia   | 0                   | 0                    | 0                   | 0                    |
| <b>seq1098</b> | Firmicutes    | Clostridia   | 0                   | 0                    | 0                   | 0                    |
| <b>seq1103</b> | Firmicutes    | Clostridia   | 0                   | 0                    | 0                   | 0                    |
| <b>seq1110</b> | Firmicutes    | Clostridia   | 0                   | 0                    | 0                   | 0                    |
| <b>seq1113</b> | Firmicutes    | Clostridia   | 0                   | 0                    | 0                   | 0                    |
| <b>seq1119</b> | Firmicutes    | Clostridia   | 0                   | 0                    | 0                   | 0                    |
| <b>seq1120</b> | Firmicutes    | Clostridia   | 0                   | 0                    | 0                   | 0                    |
| <b>seq1121</b> | Firmicutes    | Clostridia   | 0                   | 0                    | 0                   | 8                    |
| <b>seq1135</b> | Firmicutes    | Clostridia   | 0                   | 0                    | 0                   | 0                    |
| <b>seq1139</b> | Firmicutes    | Clostridia   | 0                   | 0                    | 0                   | 0                    |
| <b>seq1159</b> | Firmicutes    | Clostridia   | 0                   | 0                    | 0                   | 0                    |
| <b>seq1163</b> | Firmicutes    | Clostridia   | 0                   | 0                    | 0                   | 0                    |
| <b>seq1172</b> | Firmicutes    | Clostridia   | 0                   | 0                    | 5                   | 15                   |
| <b>seq1177</b> | Firmicutes    | Clostridia   | 0                   | 0                    | 0                   | 0                    |
| <b>seq1193</b> | Firmicutes    | Clostridia   | 0                   | 0                    | 0                   | 0                    |
| <b>seq1196</b> | Firmicutes    | Clostridia   | 0                   | 0                    | 0                   | 0                    |
| <b>seq1198</b> | Firmicutes    | Clostridia   | 0                   | 0                    | 0                   | 0                    |
| <b>seq1210</b> | Firmicutes    | Clostridia   | 0                   | 0                    | 0                   | 0                    |
| <b>seq1212</b> | Firmicutes    | Clostridia   | 0                   | 0                    | 0                   | 0                    |
| <b>seq1231</b> | Firmicutes    | Clostridia   | 0                   | 0                    | 0                   | 0                    |
| <b>seq1234</b> | Firmicutes    | Clostridia   | 0                   | 0                    | 0                   | 0                    |
| <b>seq1235</b> | Firmicutes    | Clostridia   | 0                   | 0                    | 0                   | 0                    |
| <b>seq1241</b> | Firmicutes    | Clostridia   | 0                   | 0                    | 0                   | 0                    |
| <b>seq1248</b> | Firmicutes    | Clostridia   | 0                   | 0                    | 0                   | 0                    |
| <b>seq1249</b> | Firmicutes    | Clostridia   | 0                   | 0                    | 0                   | 0                    |
| <b>seq1250</b> | Firmicutes    | Clostridia   | 16                  | 0                    | 0                   | 0                    |
| <b>seq1259</b> | Firmicutes    | Clostridia   | 0                   | 0                    | 0                   | 0                    |

Sequence Count Table

|                | <b>Phylum</b> | <b>Class</b> | <b>Subject27WK0</b> | <b>Subject27WK12</b> | <b>Subject15WK0</b> | <b>Subject15WK12</b> |
|----------------|---------------|--------------|---------------------|----------------------|---------------------|----------------------|
| <b>seq1075</b> | Firmicutes    | Clostridia   | 0                   | 0                    | 0                   | 0                    |
| <b>seq1080</b> | Firmicutes    | Clostridia   | 0                   | 0                    | 0                   | 0                    |
| <b>seq1084</b> | Firmicutes    | Clostridia   | 0                   | 0                    | 0                   | 0                    |
| <b>seq1088</b> | Firmicutes    | Clostridia   | 0                   | 0                    | 0                   | 0                    |
| <b>seq1091</b> | Firmicutes    | Clostridia   | 0                   | 0                    | 0                   | 0                    |
| <b>seq1096</b> | Firmicutes    | Clostridia   | 0                   | 0                    | 0                   | 0                    |
| <b>seq1098</b> | Firmicutes    | Clostridia   | 0                   | 0                    | 0                   | 0                    |
| <b>seq1103</b> | Firmicutes    | Clostridia   | 0                   | 0                    | 0                   | 0                    |
| <b>seq1110</b> | Firmicutes    | Clostridia   | 0                   | 0                    | 0                   | 0                    |
| <b>seq1113</b> | Firmicutes    | Clostridia   | 0                   | 0                    | 0                   | 0                    |
| <b>seq1119</b> | Firmicutes    | Clostridia   | 0                   | 0                    | 0                   | 0                    |
| <b>seq1120</b> | Firmicutes    | Clostridia   | 0                   | 0                    | 0                   | 0                    |
| <b>seq1121</b> | Firmicutes    | Clostridia   | 13                  | 0                    | 0                   | 0                    |
| <b>seq1135</b> | Firmicutes    | Clostridia   | 0                   | 0                    | 0                   | 0                    |
| <b>seq1139</b> | Firmicutes    | Clostridia   | 0                   | 0                    | 15                  | 62                   |
| <b>seq1159</b> | Firmicutes    | Clostridia   | 0                   | 0                    | 0                   | 0                    |
| <b>seq1163</b> | Firmicutes    | Clostridia   | 0                   | 0                    | 0                   | 0                    |
| <b>seq1172</b> | Firmicutes    | Clostridia   | 0                   | 11                   | 0                   | 0                    |
| <b>seq1177</b> | Firmicutes    | Clostridia   | 0                   | 0                    | 0                   | 0                    |
| <b>seq1193</b> | Firmicutes    | Clostridia   | 0                   | 0                    | 0                   | 0                    |
| <b>seq1196</b> | Firmicutes    | Clostridia   | 0                   | 0                    | 0                   | 0                    |
| <b>seq1198</b> | Firmicutes    | Clostridia   | 0                   | 0                    | 0                   | 0                    |
| <b>seq1210</b> | Firmicutes    | Clostridia   | 0                   | 0                    | 0                   | 0                    |
| <b>seq1212</b> | Firmicutes    | Clostridia   | 0                   | 0                    | 0                   | 0                    |
| <b>seq1231</b> | Firmicutes    | Clostridia   | 0                   | 0                    | 0                   | 0                    |
| <b>seq1234</b> | Firmicutes    | Clostridia   | 0                   | 0                    | 0                   | 0                    |
| <b>seq1235</b> | Firmicutes    | Clostridia   | 0                   | 0                    | 0                   | 0                    |
| <b>seq1241</b> | Firmicutes    | Clostridia   | 0                   | 0                    | 0                   | 0                    |
| <b>seq1248</b> | Firmicutes    | Clostridia   | 68                  | 0                    | 0                   | 0                    |
| <b>seq1249</b> | Firmicutes    | Clostridia   | 0                   | 0                    | 0                   | 0                    |
| <b>seq1250</b> | Firmicutes    | Clostridia   | 0                   | 0                    | 0                   | 0                    |
| <b>seq1259</b> | Firmicutes    | Clostridia   | 0                   | 0                    | 0                   | 0                    |

Sequence Count Table

|                | <b>Phylum</b> | <b>Class</b> | <b>Δ</b> |  |  |  |
|----------------|---------------|--------------|----------|--|--|--|
| <b>seq1075</b> | Firmicutes    | Clostridia   |          |  |  |  |
| <b>seq1080</b> | Firmicutes    | Clostridia   |          |  |  |  |
| <b>seq1084</b> | Firmicutes    | Clostridia   |          |  |  |  |
| <b>seq1088</b> | Firmicutes    | Clostridia   |          |  |  |  |
| <b>seq1091</b> | Firmicutes    | Clostridia   |          |  |  |  |
| <b>seq1096</b> | Firmicutes    | Clostridia   |          |  |  |  |
| <b>seq1098</b> | Firmicutes    | Clostridia   |          |  |  |  |
| <b>seq1103</b> | Firmicutes    | Clostridia   |          |  |  |  |
| <b>seq1110</b> | Firmicutes    | Clostridia   |          |  |  |  |
| <b>seq1113</b> | Firmicutes    | Clostridia   |          |  |  |  |
| <b>seq1119</b> | Firmicutes    | Clostridia   |          |  |  |  |
| <b>seq1120</b> | Firmicutes    | Clostridia   |          |  |  |  |
| <b>seq1121</b> | Firmicutes    | Clostridia   |          |  |  |  |
| <b>seq1135</b> | Firmicutes    | Clostridia   |          |  |  |  |
| <b>seq1139</b> | Firmicutes    | Clostridia   |          |  |  |  |
| <b>seq1159</b> | Firmicutes    | Clostridia   |          |  |  |  |
| <b>seq1163</b> | Firmicutes    | Clostridia   |          |  |  |  |
| <b>seq1172</b> | Firmicutes    | Clostridia   |          |  |  |  |
| <b>seq1177</b> | Firmicutes    | Clostridia   |          |  |  |  |
| <b>seq1193</b> | Firmicutes    | Clostridia   |          |  |  |  |
| <b>seq1196</b> | Firmicutes    | Clostridia   |          |  |  |  |
| <b>seq1198</b> | Firmicutes    | Clostridia   |          |  |  |  |
| <b>seq1210</b> | Firmicutes    | Clostridia   |          |  |  |  |
| <b>seq1212</b> | Firmicutes    | Clostridia   |          |  |  |  |
| <b>seq1231</b> | Firmicutes    | Clostridia   |          |  |  |  |
| <b>seq1234</b> | Firmicutes    | Clostridia   |          |  |  |  |
| <b>seq1235</b> | Firmicutes    | Clostridia   |          |  |  |  |
| <b>seq1241</b> | Firmicutes    | Clostridia   |          |  |  |  |
| <b>seq1248</b> | Firmicutes    | Clostridia   |          |  |  |  |
| <b>seq1249</b> | Firmicutes    | Clostridia   |          |  |  |  |
| <b>seq1250</b> | Firmicutes    | Clostridia   |          |  |  |  |
| <b>seq1259</b> | Firmicutes    | Clostridia   |          |  |  |  |

Sequence Count Table

|                | <b>Phylum</b> | <b>Class</b> | <b>Order</b>  | <b>Family</b>   |
|----------------|---------------|--------------|---------------|-----------------|
| <b>seq1261</b> | Firmicutes    | Clostridia   | Clostridiales | Lachnospiraceae |
| <b>seq1262</b> | Firmicutes    | Clostridia   | Clostridiales | Lachnospiraceae |
| <b>seq1266</b> | Firmicutes    | Clostridia   | Clostridiales | Lachnospiraceae |
| <b>seq1267</b> | Firmicutes    | Clostridia   | Clostridiales | Lachnospiraceae |
| <b>seq1271</b> | Firmicutes    | Clostridia   | Clostridiales | Lachnospiraceae |
| <b>seq1273</b> | Firmicutes    | Clostridia   | Clostridiales | Lachnospiraceae |
| <b>seq1276</b> | Firmicutes    | Clostridia   | Clostridiales | Lachnospiraceae |
| <b>seq1279</b> | Firmicutes    | Clostridia   | Clostridiales | Lachnospiraceae |
| <b>seq1286</b> | Firmicutes    | Clostridia   | Clostridiales | Lachnospiraceae |
| <b>seq1292</b> | Firmicutes    | Clostridia   | Clostridiales | Lachnospiraceae |
| <b>seq1295</b> | Firmicutes    | Clostridia   | Clostridiales | Lachnospiraceae |
| <b>seq1304</b> | Firmicutes    | Clostridia   | Clostridiales | Lachnospiraceae |
| <b>seq1309</b> | Firmicutes    | Clostridia   | Clostridiales | Lachnospiraceae |
| <b>seq1322</b> | Firmicutes    | Clostridia   | Clostridiales | Lachnospiraceae |
| <b>seq1328</b> | Firmicutes    | Clostridia   | Clostridiales | Lachnospiraceae |
| <b>seq1350</b> | Firmicutes    | Clostridia   | Clostridiales | Lachnospiraceae |
| <b>seq1351</b> | Firmicutes    | Clostridia   | Clostridiales | Lachnospiraceae |
| <b>seq1358</b> | Firmicutes    | Clostridia   | Clostridiales | Lachnospiraceae |
| <b>seq1359</b> | Firmicutes    | Clostridia   | Clostridiales | Lachnospiraceae |
| <b>seq1360</b> | Firmicutes    | Clostridia   | Clostridiales | Lachnospiraceae |
| <b>seq1374</b> | Firmicutes    | Clostridia   | Clostridiales | Lachnospiraceae |
| <b>seq1380</b> | Firmicutes    | Clostridia   | Clostridiales | Lachnospiraceae |
| <b>seq1402</b> | Firmicutes    | Clostridia   | Clostridiales | Lachnospiraceae |
| <b>seq1413</b> | Firmicutes    | Clostridia   | Clostridiales | Lachnospiraceae |
| <b>seq1418</b> | Firmicutes    | Clostridia   | Clostridiales | Lachnospiraceae |
| <b>seq1447</b> | Firmicutes    | Clostridia   | Clostridiales | Lachnospiraceae |
| <b>seq1451</b> | Firmicutes    | Clostridia   | Clostridiales | Lachnospiraceae |
| <b>seq1456</b> | Firmicutes    | Clostridia   | Clostridiales | Lachnospiraceae |
| <b>seq1458</b> | Firmicutes    | Clostridia   | Clostridiales | Lachnospiraceae |
| <b>seq1465</b> | Firmicutes    | Clostridia   | Clostridiales | Lachnospiraceae |
| <b>seq1466</b> | Firmicutes    | Clostridia   | Clostridiales | Lachnospiraceae |
| <b>seq1470</b> | Firmicutes    | Clostridia   | Clostridiales | Lachnospiraceae |

Sequence Count Table

|                | <b>Phylum</b> | <b>Class</b> | <b>Genus</b> | <b>Species</b> |
|----------------|---------------|--------------|--------------|----------------|
| <b>seq1261</b> | Firmicutes    | Clostridia   |              |                |
| <b>seq1262</b> | Firmicutes    | Clostridia   |              |                |
| <b>seq1266</b> | Firmicutes    | Clostridia   |              |                |
| <b>seq1267</b> | Firmicutes    | Clostridia   |              |                |
| <b>seq1271</b> | Firmicutes    | Clostridia   |              |                |
| <b>seq1273</b> | Firmicutes    | Clostridia   |              |                |
| <b>seq1276</b> | Firmicutes    | Clostridia   |              |                |
| <b>seq1279</b> | Firmicutes    | Clostridia   |              |                |
| <b>seq1286</b> | Firmicutes    | Clostridia   |              |                |
| <b>seq1292</b> | Firmicutes    | Clostridia   |              |                |
| <b>seq1295</b> | Firmicutes    | Clostridia   |              |                |
| <b>seq1304</b> | Firmicutes    | Clostridia   |              |                |
| <b>seq1309</b> | Firmicutes    | Clostridia   |              |                |
| <b>seq1322</b> | Firmicutes    | Clostridia   |              |                |
| <b>seq1328</b> | Firmicutes    | Clostridia   |              |                |
| <b>seq1350</b> | Firmicutes    | Clostridia   |              |                |
| <b>seq1351</b> | Firmicutes    | Clostridia   |              |                |
| <b>seq1358</b> | Firmicutes    | Clostridia   |              |                |
| <b>seq1359</b> | Firmicutes    | Clostridia   |              |                |
| <b>seq1360</b> | Firmicutes    | Clostridia   |              |                |
| <b>seq1374</b> | Firmicutes    | Clostridia   |              |                |
| <b>seq1380</b> | Firmicutes    | Clostridia   |              |                |
| <b>seq1402</b> | Firmicutes    | Clostridia   |              |                |
| <b>seq1413</b> | Firmicutes    | Clostridia   |              |                |
| <b>seq1418</b> | Firmicutes    | Clostridia   |              |                |
| <b>seq1447</b> | Firmicutes    | Clostridia   |              |                |
| <b>seq1451</b> | Firmicutes    | Clostridia   |              |                |
| <b>seq1456</b> | Firmicutes    | Clostridia   |              |                |
| <b>seq1458</b> | Firmicutes    | Clostridia   |              |                |
| <b>seq1465</b> | Firmicutes    | Clostridia   |              |                |
| <b>seq1466</b> | Firmicutes    | Clostridia   |              |                |
| <b>seq1470</b> | Firmicutes    | Clostridia   |              |                |



Sequence Count Table

|                | <b>Phylum</b> | <b>Class</b> | <b>Subject34WK0</b> | <b>Subject34WK12</b> | <b>Subject16WK0</b> | <b>Subject16WK12</b> |
|----------------|---------------|--------------|---------------------|----------------------|---------------------|----------------------|
| <b>seq1261</b> | Firmicutes    | Clostridia   | 0                   | 0                    | 0                   | 0                    |
| <b>seq1262</b> | Firmicutes    | Clostridia   | 0                   | 0                    | 0                   | 0                    |
| <b>seq1266</b> | Firmicutes    | Clostridia   | 0                   | 0                    | 0                   | 0                    |
| <b>seq1267</b> | Firmicutes    | Clostridia   | 0                   | 0                    | 0                   | 0                    |
| <b>seq1271</b> | Firmicutes    | Clostridia   | 0                   | 0                    | 0                   | 0                    |
| <b>seq1273</b> | Firmicutes    | Clostridia   | 0                   | 0                    | 0                   | 0                    |
| <b>seq1276</b> | Firmicutes    | Clostridia   | 0                   | 0                    | 0                   | 0                    |
| <b>seq1279</b> | Firmicutes    | Clostridia   | 0                   | 0                    | 0                   | 0                    |
| <b>seq1286</b> | Firmicutes    | Clostridia   | 0                   | 0                    | 39                  | 20                   |
| <b>seq1292</b> | Firmicutes    | Clostridia   | 0                   | 0                    | 0                   | 0                    |
| <b>seq1295</b> | Firmicutes    | Clostridia   | 0                   | 0                    | 0                   | 0                    |
| <b>seq1304</b> | Firmicutes    | Clostridia   | 0                   | 0                    | 0                   | 0                    |
| <b>seq1309</b> | Firmicutes    | Clostridia   | 0                   | 0                    | 0                   | 0                    |
| <b>seq1322</b> | Firmicutes    | Clostridia   | 0                   | 0                    | 0                   | 0                    |
| <b>seq1328</b> | Firmicutes    | Clostridia   | 0                   | 0                    | 0                   | 0                    |
| <b>seq1350</b> | Firmicutes    | Clostridia   | 0                   | 0                    | 0                   | 0                    |
| <b>seq1351</b> | Firmicutes    | Clostridia   | 0                   | 0                    | 0                   | 0                    |
| <b>seq1358</b> | Firmicutes    | Clostridia   | 0                   | 0                    | 0                   | 0                    |
| <b>seq1359</b> | Firmicutes    | Clostridia   | 0                   | 0                    | 0                   | 0                    |
| <b>seq1360</b> | Firmicutes    | Clostridia   | 0                   | 0                    | 0                   | 0                    |
| <b>seq1374</b> | Firmicutes    | Clostridia   | 0                   | 0                    | 0                   | 0                    |
| <b>seq1380</b> | Firmicutes    | Clostridia   | 0                   | 0                    | 0                   | 0                    |
| <b>seq1402</b> | Firmicutes    | Clostridia   | 0                   | 0                    | 0                   | 0                    |
| <b>seq1413</b> | Firmicutes    | Clostridia   | 0                   | 0                    | 0                   | 0                    |
| <b>seq1418</b> | Firmicutes    | Clostridia   | 0                   | 0                    | 0                   | 0                    |
| <b>seq1447</b> | Firmicutes    | Clostridia   | 0                   | 0                    | 0                   | 0                    |
| <b>seq1451</b> | Firmicutes    | Clostridia   | 0                   | 0                    | 0                   | 0                    |
| <b>seq1456</b> | Firmicutes    | Clostridia   | 0                   | 0                    | 0                   | 0                    |
| <b>seq1458</b> | Firmicutes    | Clostridia   | 0                   | 0                    | 0                   | 0                    |
| <b>seq1465</b> | Firmicutes    | Clostridia   | 0                   | 0                    | 0                   | 0                    |
| <b>seq1466</b> | Firmicutes    | Clostridia   | 0                   | 0                    | 0                   | 0                    |
| <b>seq1470</b> | Firmicutes    | Clostridia   | 0                   | 0                    | 0                   | 0                    |

Sequence Count Table

|                | <b>Phylum</b> | <b>Class</b> | <b>Subject17WK0</b> | <b>Subject17WK12</b> | <b>Subject1WK0</b> | <b>Subject1WK12</b> |
|----------------|---------------|--------------|---------------------|----------------------|--------------------|---------------------|
| <b>seq1261</b> | Firmicutes    | Clostridia   | 0                   | 0                    | 0                  | 0                   |
| <b>seq1262</b> | Firmicutes    | Clostridia   | 0                   | 0                    | 0                  | 0                   |
| <b>seq1266</b> | Firmicutes    | Clostridia   | 0                   | 0                    | 0                  | 0                   |
| <b>seq1267</b> | Firmicutes    | Clostridia   | 0                   | 0                    | 0                  | 0                   |
| <b>seq1271</b> | Firmicutes    | Clostridia   | 0                   | 0                    | 0                  | 63                  |
| <b>seq1273</b> | Firmicutes    | Clostridia   | 0                   | 0                    | 0                  | 0                   |
| <b>seq1276</b> | Firmicutes    | Clostridia   | 62                  | 0                    | 0                  | 0                   |
| <b>seq1279</b> | Firmicutes    | Clostridia   | 0                   | 0                    | 0                  | 0                   |
| <b>seq1286</b> | Firmicutes    | Clostridia   | 0                   | 0                    | 0                  | 0                   |
| <b>seq1292</b> | Firmicutes    | Clostridia   | 0                   | 0                    | 0                  | 0                   |
| <b>seq1295</b> | Firmicutes    | Clostridia   | 0                   | 57                   | 0                  | 0                   |
| <b>seq1304</b> | Firmicutes    | Clostridia   | 0                   | 0                    | 0                  | 0                   |
| <b>seq1309</b> | Firmicutes    | Clostridia   | 0                   | 0                    | 28                 | 26                  |
| <b>seq1322</b> | Firmicutes    | Clostridia   | 0                   | 0                    | 26                 | 0                   |
| <b>seq1328</b> | Firmicutes    | Clostridia   | 0                   | 31                   | 0                  | 0                   |
| <b>seq1350</b> | Firmicutes    | Clostridia   | 0                   | 0                    | 0                  | 0                   |
| <b>seq1351</b> | Firmicutes    | Clostridia   | 0                   | 0                    | 0                  | 0                   |
| <b>seq1358</b> | Firmicutes    | Clostridia   | 0                   | 0                    | 0                  | 0                   |
| <b>seq1359</b> | Firmicutes    | Clostridia   | 0                   | 0                    | 0                  | 0                   |
| <b>seq1360</b> | Firmicutes    | Clostridia   | 0                   | 0                    | 0                  | 0                   |
| <b>seq1374</b> | Firmicutes    | Clostridia   | 0                   | 0                    | 0                  | 0                   |
| <b>seq1380</b> | Firmicutes    | Clostridia   | 0                   | 0                    | 0                  | 0                   |
| <b>seq1402</b> | Firmicutes    | Clostridia   | 0                   | 0                    | 0                  | 0                   |
| <b>seq1413</b> | Firmicutes    | Clostridia   | 0                   | 0                    | 0                  | 0                   |
| <b>seq1418</b> | Firmicutes    | Clostridia   | 0                   | 0                    | 0                  | 0                   |
| <b>seq1447</b> | Firmicutes    | Clostridia   | 0                   | 0                    | 0                  | 0                   |
| <b>seq1451</b> | Firmicutes    | Clostridia   | 0                   | 0                    | 0                  | 0                   |
| <b>seq1456</b> | Firmicutes    | Clostridia   | 0                   | 0                    | 0                  | 15                  |
| <b>seq1458</b> | Firmicutes    | Clostridia   | 0                   | 0                    | 0                  | 0                   |
| <b>seq1465</b> | Firmicutes    | Clostridia   | 0                   | 0                    | 32                 | 0                   |
| <b>seq1466</b> | Firmicutes    | Clostridia   | 0                   | 0                    | 0                  | 0                   |
| <b>seq1470</b> | Firmicutes    | Clostridia   | 0                   | 0                    | 0                  | 0                   |

Sequence Count Table

|                | <b>Phylum</b> | <b>Class</b> | <b>Subject2WK0</b> | <b>Subject2WK12</b> | <b>Subject3WK0</b> | <b>Subject3WK12</b> |
|----------------|---------------|--------------|--------------------|---------------------|--------------------|---------------------|
| <b>seq1261</b> | Firmicutes    | Clostridia   | 0                  | 0                   | 0                  | 0                   |
| <b>seq1262</b> | Firmicutes    | Clostridia   | 0                  | 0                   | 0                  | 0                   |
| <b>seq1266</b> | Firmicutes    | Clostridia   | 0                  | 0                   | 0                  | 0                   |
| <b>seq1267</b> | Firmicutes    | Clostridia   | 0                  | 0                   | 0                  | 0                   |
| <b>seq1271</b> | Firmicutes    | Clostridia   | 0                  | 0                   | 0                  | 0                   |
| <b>seq1273</b> | Firmicutes    | Clostridia   | 0                  | 0                   | 0                  | 0                   |
| <b>seq1276</b> | Firmicutes    | Clostridia   | 0                  | 0                   | 0                  | 0                   |
| <b>seq1279</b> | Firmicutes    | Clostridia   | 0                  | 0                   | 0                  | 0                   |
| <b>seq1286</b> | Firmicutes    | Clostridia   | 0                  | 0                   | 0                  | 0                   |
| <b>seq1292</b> | Firmicutes    | Clostridia   | 0                  | 0                   | 0                  | 0                   |
| <b>seq1295</b> | Firmicutes    | Clostridia   | 0                  | 0                   | 0                  | 0                   |
| <b>seq1304</b> | Firmicutes    | Clostridia   | 0                  | 0                   | 12                 | 44                  |
| <b>seq1309</b> | Firmicutes    | Clostridia   | 0                  | 0                   | 0                  | 0                   |
| <b>seq1322</b> | Firmicutes    | Clostridia   | 0                  | 0                   | 0                  | 0                   |
| <b>seq1328</b> | Firmicutes    | Clostridia   | 0                  | 0                   | 0                  | 0                   |
| <b>seq1350</b> | Firmicutes    | Clostridia   | 0                  | 0                   | 0                  | 0                   |
| <b>seq1351</b> | Firmicutes    | Clostridia   | 0                  | 0                   | 0                  | 0                   |
| <b>seq1358</b> | Firmicutes    | Clostridia   | 0                  | 0                   | 0                  | 0                   |
| <b>seq1359</b> | Firmicutes    | Clostridia   | 0                  | 0                   | 0                  | 0                   |
| <b>seq1360</b> | Firmicutes    | Clostridia   | 0                  | 0                   | 0                  | 0                   |
| <b>seq1374</b> | Firmicutes    | Clostridia   | 0                  | 0                   | 0                  | 0                   |
| <b>seq1380</b> | Firmicutes    | Clostridia   | 0                  | 0                   | 0                  | 0                   |
| <b>seq1402</b> | Firmicutes    | Clostridia   | 0                  | 0                   | 0                  | 0                   |
| <b>seq1413</b> | Firmicutes    | Clostridia   | 16                 | 23                  | 0                  | 0                   |
| <b>seq1418</b> | Firmicutes    | Clostridia   | 0                  | 0                   | 0                  | 0                   |
| <b>seq1447</b> | Firmicutes    | Clostridia   | 0                  | 34                  | 0                  | 0                   |
| <b>seq1451</b> | Firmicutes    | Clostridia   | 0                  | 0                   | 0                  | 0                   |
| <b>seq1456</b> | Firmicutes    | Clostridia   | 0                  | 0                   | 0                  | 0                   |
| <b>seq1458</b> | Firmicutes    | Clostridia   | 33                 | 0                   | 0                  | 0                   |
| <b>seq1465</b> | Firmicutes    | Clostridia   | 0                  | 0                   | 0                  | 0                   |
| <b>seq1466</b> | Firmicutes    | Clostridia   | 0                  | 0                   | 0                  | 0                   |
| <b>seq1470</b> | Firmicutes    | Clostridia   | 0                  | 0                   | 0                  | 0                   |

Sequence Count Table

|                | <b>Phylum</b> | <b>Class</b> | <b>Subject4WK0</b> | <b>Subject4WK12</b> | <b>Subject5WK0</b> | <b>Subject5WK12</b> |
|----------------|---------------|--------------|--------------------|---------------------|--------------------|---------------------|
| <b>seq1261</b> | Firmicutes    | Clostridia   | 0                  | 0                   | 0                  | 0                   |
| <b>seq1262</b> | Firmicutes    | Clostridia   | 0                  | 0                   | 0                  | 0                   |
| <b>seq1266</b> | Firmicutes    | Clostridia   | 0                  | 0                   | 0                  | 0                   |
| <b>seq1267</b> | Firmicutes    | Clostridia   | 0                  | 0                   | 0                  | 0                   |
| <b>seq1271</b> | Firmicutes    | Clostridia   | 0                  | 0                   | 0                  | 0                   |
| <b>seq1273</b> | Firmicutes    | Clostridia   | 0                  | 0                   | 0                  | 63                  |
| <b>seq1276</b> | Firmicutes    | Clostridia   | 0                  | 0                   | 0                  | 0                   |
| <b>seq1279</b> | Firmicutes    | Clostridia   | 0                  | 0                   | 19                 | 0                   |
| <b>seq1286</b> | Firmicutes    | Clostridia   | 0                  | 0                   | 0                  | 0                   |
| <b>seq1292</b> | Firmicutes    | Clostridia   | 0                  | 0                   | 0                  | 0                   |
| <b>seq1295</b> | Firmicutes    | Clostridia   | 0                  | 0                   | 0                  | 0                   |
| <b>seq1304</b> | Firmicutes    | Clostridia   | 0                  | 0                   | 0                  | 0                   |
| <b>seq1309</b> | Firmicutes    | Clostridia   | 0                  | 0                   | 0                  | 0                   |
| <b>seq1322</b> | Firmicutes    | Clostridia   | 0                  | 0                   | 0                  | 0                   |
| <b>seq1328</b> | Firmicutes    | Clostridia   | 0                  | 0                   | 0                  | 0                   |
| <b>seq1350</b> | Firmicutes    | Clostridia   | 0                  | 0                   | 0                  | 0                   |
| <b>seq1351</b> | Firmicutes    | Clostridia   | 0                  | 0                   | 0                  | 0                   |
| <b>seq1358</b> | Firmicutes    | Clostridia   | 0                  | 0                   | 0                  | 0                   |
| <b>seq1359</b> | Firmicutes    | Clostridia   | 0                  | 0                   | 0                  | 0                   |
| <b>seq1360</b> | Firmicutes    | Clostridia   | 0                  | 0                   | 0                  | 0                   |
| <b>seq1374</b> | Firmicutes    | Clostridia   | 0                  | 0                   | 0                  | 0                   |
| <b>seq1380</b> | Firmicutes    | Clostridia   | 0                  | 0                   | 0                  | 0                   |
| <b>seq1402</b> | Firmicutes    | Clostridia   | 0                  | 0                   | 0                  | 0                   |
| <b>seq1413</b> | Firmicutes    | Clostridia   | 0                  | 0                   | 0                  | 0                   |
| <b>seq1418</b> | Firmicutes    | Clostridia   | 0                  | 0                   | 0                  | 0                   |
| <b>seq1447</b> | Firmicutes    | Clostridia   | 0                  | 0                   | 0                  | 0                   |
| <b>seq1451</b> | Firmicutes    | Clostridia   | 0                  | 0                   | 0                  | 0                   |
| <b>seq1456</b> | Firmicutes    | Clostridia   | 0                  | 0                   | 0                  | 0                   |
| <b>seq1458</b> | Firmicutes    | Clostridia   | 0                  | 0                   | 0                  | 0                   |
| <b>seq1465</b> | Firmicutes    | Clostridia   | 0                  | 0                   | 0                  | 0                   |
| <b>seq1466</b> | Firmicutes    | Clostridia   | 0                  | 32                  | 0                  | 0                   |
| <b>seq1470</b> | Firmicutes    | Clostridia   | 0                  | 0                   | 0                  | 0                   |

Sequence Count Table

|                | <b>Phylum</b> | <b>Class</b> | <b>Subject6WK0</b> | <b>Subject6WK12</b> | <b>Subject18WK0</b> | <b>Subject18WK12</b> |
|----------------|---------------|--------------|--------------------|---------------------|---------------------|----------------------|
| <b>seq1261</b> | Firmicutes    | Clostridia   | 0                  | 0                   | 0                   | 0                    |
| <b>seq1262</b> | Firmicutes    | Clostridia   | 0                  | 0                   | 0                   | 0                    |
| <b>seq1266</b> | Firmicutes    | Clostridia   | 0                  | 0                   | 0                   | 0                    |
| <b>seq1267</b> | Firmicutes    | Clostridia   | 0                  | 0                   | 0                   | 0                    |
| <b>seq1271</b> | Firmicutes    | Clostridia   | 0                  | 0                   | 0                   | 0                    |
| <b>seq1273</b> | Firmicutes    | Clostridia   | 0                  | 0                   | 0                   | 0                    |
| <b>seq1276</b> | Firmicutes    | Clostridia   | 0                  | 0                   | 0                   | 0                    |
| <b>seq1279</b> | Firmicutes    | Clostridia   | 0                  | 0                   | 0                   | 0                    |
| <b>seq1286</b> | Firmicutes    | Clostridia   | 0                  | 0                   | 0                   | 0                    |
| <b>seq1292</b> | Firmicutes    | Clostridia   | 0                  | 0                   | 0                   | 0                    |
| <b>seq1295</b> | Firmicutes    | Clostridia   | 0                  | 0                   | 0                   | 0                    |
| <b>seq1304</b> | Firmicutes    | Clostridia   | 0                  | 0                   | 0                   | 0                    |
| <b>seq1309</b> | Firmicutes    | Clostridia   | 0                  | 0                   | 0                   | 0                    |
| <b>seq1322</b> | Firmicutes    | Clostridia   | 0                  | 0                   | 0                   | 0                    |
| <b>seq1328</b> | Firmicutes    | Clostridia   | 0                  | 0                   | 0                   | 0                    |
| <b>seq1350</b> | Firmicutes    | Clostridia   | 0                  | 0                   | 0                   | 8                    |
| <b>seq1351</b> | Firmicutes    | Clostridia   | 0                  | 0                   | 0                   | 0                    |
| <b>seq1358</b> | Firmicutes    | Clostridia   | 0                  | 0                   | 0                   | 0                    |
| <b>seq1359</b> | Firmicutes    | Clostridia   | 0                  | 0                   | 0                   | 0                    |
| <b>seq1360</b> | Firmicutes    | Clostridia   | 0                  | 0                   | 0                   | 0                    |
| <b>seq1374</b> | Firmicutes    | Clostridia   | 0                  | 0                   | 0                   | 0                    |
| <b>seq1380</b> | Firmicutes    | Clostridia   | 0                  | 0                   | 0                   | 0                    |
| <b>seq1402</b> | Firmicutes    | Clostridia   | 0                  | 0                   | 0                   | 0                    |
| <b>seq1413</b> | Firmicutes    | Clostridia   | 0                  | 0                   | 0                   | 0                    |
| <b>seq1418</b> | Firmicutes    | Clostridia   | 0                  | 0                   | 0                   | 0                    |
| <b>seq1447</b> | Firmicutes    | Clostridia   | 0                  | 0                   | 0                   | 0                    |
| <b>seq1451</b> | Firmicutes    | Clostridia   | 0                  | 0                   | 0                   | 0                    |
| <b>seq1456</b> | Firmicutes    | Clostridia   | 0                  | 0                   | 0                   | 0                    |
| <b>seq1458</b> | Firmicutes    | Clostridia   | 0                  | 0                   | 0                   | 0                    |
| <b>seq1465</b> | Firmicutes    | Clostridia   | 0                  | 0                   | 0                   | 0                    |
| <b>seq1466</b> | Firmicutes    | Clostridia   | 0                  | 0                   | 0                   | 0                    |
| <b>seq1470</b> | Firmicutes    | Clostridia   | 0                  | 0                   | 0                   | 0                    |

Sequence Count Table

|                | <b>Phylum</b> | <b>Class</b> | <b>Subject19WK0</b> | <b>Subject19WK12</b> | <b>Subject20WK0</b> | <b>Subject20WK12</b> |
|----------------|---------------|--------------|---------------------|----------------------|---------------------|----------------------|
| <b>seq1261</b> | Firmicutes    | Clostridia   | 0                   | 0                    | 0                   | 0                    |
| <b>seq1262</b> | Firmicutes    | Clostridia   | 0                   | 0                    | 0                   | 0                    |
| <b>seq1266</b> | Firmicutes    | Clostridia   | 0                   | 64                   | 0                   | 0                    |
| <b>seq1267</b> | Firmicutes    | Clostridia   | 0                   | 0                    | 0                   | 0                    |
| <b>seq1271</b> | Firmicutes    | Clostridia   | 0                   | 0                    | 0                   | 0                    |
| <b>seq1273</b> | Firmicutes    | Clostridia   | 0                   | 0                    | 0                   | 0                    |
| <b>seq1276</b> | Firmicutes    | Clostridia   | 0                   | 0                    | 0                   | 0                    |
| <b>seq1279</b> | Firmicutes    | Clostridia   | 0                   | 0                    | 0                   | 0                    |
| <b>seq1286</b> | Firmicutes    | Clostridia   | 0                   | 0                    | 0                   | 0                    |
| <b>seq1292</b> | Firmicutes    | Clostridia   | 0                   | 0                    | 0                   | 0                    |
| <b>seq1295</b> | Firmicutes    | Clostridia   | 0                   | 0                    | 0                   | 0                    |
| <b>seq1304</b> | Firmicutes    | Clostridia   | 0                   | 0                    | 0                   | 0                    |
| <b>seq1309</b> | Firmicutes    | Clostridia   | 0                   | 0                    | 0                   | 0                    |
| <b>seq1322</b> | Firmicutes    | Clostridia   | 0                   | 0                    | 0                   | 0                    |
| <b>seq1328</b> | Firmicutes    | Clostridia   | 0                   | 0                    | 0                   | 20                   |
| <b>seq1350</b> | Firmicutes    | Clostridia   | 0                   | 0                    | 0                   | 0                    |
| <b>seq1351</b> | Firmicutes    | Clostridia   | 0                   | 0                    | 0                   | 48                   |
| <b>seq1358</b> | Firmicutes    | Clostridia   | 0                   | 0                    | 0                   | 0                    |
| <b>seq1359</b> | Firmicutes    | Clostridia   | 0                   | 0                    | 0                   | 0                    |
| <b>seq1360</b> | Firmicutes    | Clostridia   | 0                   | 0                    | 0                   | 0                    |
| <b>seq1374</b> | Firmicutes    | Clostridia   | 0                   | 0                    | 0                   | 0                    |
| <b>seq1380</b> | Firmicutes    | Clostridia   | 0                   | 0                    | 0                   | 0                    |
| <b>seq1402</b> | Firmicutes    | Clostridia   | 0                   | 0                    | 0                   | 0                    |
| <b>seq1413</b> | Firmicutes    | Clostridia   | 0                   | 0                    | 0                   | 0                    |
| <b>seq1418</b> | Firmicutes    | Clostridia   | 0                   | 39                   | 0                   | 0                    |
| <b>seq1447</b> | Firmicutes    | Clostridia   | 0                   | 0                    | 0                   | 0                    |
| <b>seq1451</b> | Firmicutes    | Clostridia   | 0                   | 0                    | 0                   | 0                    |
| <b>seq1456</b> | Firmicutes    | Clostridia   | 0                   | 0                    | 0                   | 0                    |
| <b>seq1458</b> | Firmicutes    | Clostridia   | 0                   | 0                    | 0                   | 0                    |
| <b>seq1465</b> | Firmicutes    | Clostridia   | 0                   | 0                    | 0                   | 0                    |
| <b>seq1466</b> | Firmicutes    | Clostridia   | 0                   | 0                    | 0                   | 0                    |
| <b>seq1470</b> | Firmicutes    | Clostridia   | 0                   | 0                    | 0                   | 0                    |

Sequence Count Table

|                | <b>Phylum</b> | <b>Class</b> | <b>Subject7WK0</b> | <b>Subject7WK12</b> | <b>Subject21WK0</b> | <b>Subject21WK12</b> |
|----------------|---------------|--------------|--------------------|---------------------|---------------------|----------------------|
| <b>seq1261</b> | Firmicutes    | Clostridia   | 0                  | 0                   | 0                   | 0                    |
| <b>seq1262</b> | Firmicutes    | Clostridia   | 0                  | 0                   | 0                   | 0                    |
| <b>seq1266</b> | Firmicutes    | Clostridia   | 0                  | 0                   | 0                   | 0                    |
| <b>seq1267</b> | Firmicutes    | Clostridia   | 0                  | 0                   | 0                   | 0                    |
| <b>seq1271</b> | Firmicutes    | Clostridia   | 0                  | 0                   | 0                   | 0                    |
| <b>seq1273</b> | Firmicutes    | Clostridia   | 0                  | 0                   | 0                   | 0                    |
| <b>seq1276</b> | Firmicutes    | Clostridia   | 0                  | 0                   | 0                   | 0                    |
| <b>seq1279</b> | Firmicutes    | Clostridia   | 0                  | 0                   | 0                   | 0                    |
| <b>seq1286</b> | Firmicutes    | Clostridia   | 0                  | 0                   | 0                   | 0                    |
| <b>seq1292</b> | Firmicutes    | Clostridia   | 0                  | 0                   | 0                   | 0                    |
| <b>seq1295</b> | Firmicutes    | Clostridia   | 0                  | 0                   | 0                   | 0                    |
| <b>seq1304</b> | Firmicutes    | Clostridia   | 0                  | 0                   | 0                   | 0                    |
| <b>seq1309</b> | Firmicutes    | Clostridia   | 0                  | 0                   | 0                   | 0                    |
| <b>seq1322</b> | Firmicutes    | Clostridia   | 0                  | 0                   | 0                   | 0                    |
| <b>seq1328</b> | Firmicutes    | Clostridia   | 0                  | 0                   | 0                   | 0                    |
| <b>seq1350</b> | Firmicutes    | Clostridia   | 0                  | 0                   | 0                   | 0                    |
| <b>seq1351</b> | Firmicutes    | Clostridia   | 0                  | 0                   | 0                   | 0                    |
| <b>seq1358</b> | Firmicutes    | Clostridia   | 16                 | 31                  | 0                   | 0                    |
| <b>seq1359</b> | Firmicutes    | Clostridia   | 0                  | 0                   | 0                   | 0                    |
| <b>seq1360</b> | Firmicutes    | Clostridia   | 0                  | 0                   | 0                   | 0                    |
| <b>seq1374</b> | Firmicutes    | Clostridia   | 0                  | 0                   | 0                   | 0                    |
| <b>seq1380</b> | Firmicutes    | Clostridia   | 0                  | 0                   | 0                   | 0                    |
| <b>seq1402</b> | Firmicutes    | Clostridia   | 0                  | 0                   | 41                  | 0                    |
| <b>seq1413</b> | Firmicutes    | Clostridia   | 0                  | 0                   | 0                   | 0                    |
| <b>seq1418</b> | Firmicutes    | Clostridia   | 0                  | 0                   | 0                   | 0                    |
| <b>seq1447</b> | Firmicutes    | Clostridia   | 0                  | 0                   | 0                   | 0                    |
| <b>seq1451</b> | Firmicutes    | Clostridia   | 0                  | 0                   | 0                   | 0                    |
| <b>seq1456</b> | Firmicutes    | Clostridia   | 0                  | 0                   | 0                   | 0                    |
| <b>seq1458</b> | Firmicutes    | Clostridia   | 0                  | 0                   | 0                   | 0                    |
| <b>seq1465</b> | Firmicutes    | Clostridia   | 0                  | 0                   | 0                   | 0                    |
| <b>seq1466</b> | Firmicutes    | Clostridia   | 0                  | 0                   | 0                   | 0                    |
| <b>seq1470</b> | Firmicutes    | Clostridia   | 0                  | 0                   | 0                   | 0                    |

Sequence Count Table

|                | <b>Phylum</b> | <b>Class</b> | <b>Subject8WK0</b> | <b>Subject8WK12</b> | <b>Subject9WK0</b> | <b>Subject9WK12</b> |
|----------------|---------------|--------------|--------------------|---------------------|--------------------|---------------------|
| <b>seq1261</b> | Firmicutes    | Clostridia   | 28                 | 37                  | 0                  | 0                   |
| <b>seq1262</b> | Firmicutes    | Clostridia   | 0                  | 0                   | 17                 | 0                   |
| <b>seq1266</b> | Firmicutes    | Clostridia   | 0                  | 0                   | 0                  | 0                   |
| <b>seq1267</b> | Firmicutes    | Clostridia   | 0                  | 0                   | 41                 | 23                  |
| <b>seq1271</b> | Firmicutes    | Clostridia   | 0                  | 0                   | 0                  | 0                   |
| <b>seq1273</b> | Firmicutes    | Clostridia   | 0                  | 0                   | 0                  | 0                   |
| <b>seq1276</b> | Firmicutes    | Clostridia   | 0                  | 0                   | 0                  | 0                   |
| <b>seq1279</b> | Firmicutes    | Clostridia   | 0                  | 0                   | 0                  | 0                   |
| <b>seq1286</b> | Firmicutes    | Clostridia   | 0                  | 0                   | 0                  | 0                   |
| <b>seq1292</b> | Firmicutes    | Clostridia   | 0                  | 0                   | 0                  | 0                   |
| <b>seq1295</b> | Firmicutes    | Clostridia   | 0                  | 0                   | 0                  | 0                   |
| <b>seq1304</b> | Firmicutes    | Clostridia   | 0                  | 0                   | 0                  | 0                   |
| <b>seq1309</b> | Firmicutes    | Clostridia   | 0                  | 0                   | 0                  | 0                   |
| <b>seq1322</b> | Firmicutes    | Clostridia   | 0                  | 0                   | 0                  | 0                   |
| <b>seq1328</b> | Firmicutes    | Clostridia   | 0                  | 0                   | 0                  | 0                   |
| <b>seq1350</b> | Firmicutes    | Clostridia   | 10                 | 0                   | 0                  | 0                   |
| <b>seq1351</b> | Firmicutes    | Clostridia   | 0                  | 0                   | 0                  | 0                   |
| <b>seq1358</b> | Firmicutes    | Clostridia   | 0                  | 0                   | 0                  | 0                   |
| <b>seq1359</b> | Firmicutes    | Clostridia   | 0                  | 0                   | 0                  | 0                   |
| <b>seq1360</b> | Firmicutes    | Clostridia   | 0                  | 0                   | 0                  | 0                   |
| <b>seq1374</b> | Firmicutes    | Clostridia   | 0                  | 0                   | 0                  | 0                   |
| <b>seq1380</b> | Firmicutes    | Clostridia   | 0                  | 0                   | 0                  | 0                   |
| <b>seq1402</b> | Firmicutes    | Clostridia   | 0                  | 0                   | 0                  | 0                   |
| <b>seq1413</b> | Firmicutes    | Clostridia   | 0                  | 0                   | 0                  | 0                   |
| <b>seq1418</b> | Firmicutes    | Clostridia   | 0                  | 0                   | 0                  | 0                   |
| <b>seq1447</b> | Firmicutes    | Clostridia   | 0                  | 0                   | 0                  | 0                   |
| <b>seq1451</b> | Firmicutes    | Clostridia   | 0                  | 0                   | 0                  | 0                   |
| <b>seq1456</b> | Firmicutes    | Clostridia   | 0                  | 0                   | 0                  | 0                   |
| <b>seq1458</b> | Firmicutes    | Clostridia   | 0                  | 0                   | 0                  | 0                   |
| <b>seq1465</b> | Firmicutes    | Clostridia   | 0                  | 0                   | 0                  | 0                   |
| <b>seq1466</b> | Firmicutes    | Clostridia   | 0                  | 0                   | 0                  | 0                   |
| <b>seq1470</b> | Firmicutes    | Clostridia   | 0                  | 0                   | 0                  | 0                   |



Sequence Count Table

|                | <b>Phylum</b> | <b>Class</b> | <b>Subject10WK0</b> | <b>Subject10WK12</b> | <b>Subject22WK0</b> | <b>Subject22WK12</b> |
|----------------|---------------|--------------|---------------------|----------------------|---------------------|----------------------|
| <b>seq1261</b> | Firmicutes    | Clostridia   | 0                   | 0                    | 0                   | 0                    |
| <b>seq1262</b> | Firmicutes    | Clostridia   | 28                  | 20                   | 0                   | 0                    |
| <b>seq1266</b> | Firmicutes    | Clostridia   | 0                   | 0                    | 0                   | 0                    |
| <b>seq1267</b> | Firmicutes    | Clostridia   | 0                   | 0                    | 0                   | 0                    |
| <b>seq1271</b> | Firmicutes    | Clostridia   | 0                   | 0                    | 0                   | 0                    |
| <b>seq1273</b> | Firmicutes    | Clostridia   | 0                   | 0                    | 0                   | 0                    |
| <b>seq1276</b> | Firmicutes    | Clostridia   | 0                   | 0                    | 0                   | 0                    |
| <b>seq1279</b> | Firmicutes    | Clostridia   | 26                  | 16                   | 0                   | 0                    |
| <b>seq1286</b> | Firmicutes    | Clostridia   | 0                   | 0                    | 0                   | 0                    |
| <b>seq1292</b> | Firmicutes    | Clostridia   | 0                   | 0                    | 0                   | 0                    |
| <b>seq1295</b> | Firmicutes    | Clostridia   | 0                   | 0                    | 0                   | 0                    |
| <b>seq1304</b> | Firmicutes    | Clostridia   | 0                   | 0                    | 0                   | 0                    |
| <b>seq1309</b> | Firmicutes    | Clostridia   | 0                   | 0                    | 0                   | 0                    |
| <b>seq1322</b> | Firmicutes    | Clostridia   | 0                   | 0                    | 0                   | 0                    |
| <b>seq1328</b> | Firmicutes    | Clostridia   | 0                   | 0                    | 0                   | 0                    |
| <b>seq1350</b> | Firmicutes    | Clostridia   | 0                   | 0                    | 0                   | 0                    |
| <b>seq1351</b> | Firmicutes    | Clostridia   | 0                   | 0                    | 0                   | 0                    |
| <b>seq1358</b> | Firmicutes    | Clostridia   | 0                   | 0                    | 0                   | 0                    |
| <b>seq1359</b> | Firmicutes    | Clostridia   | 22                  | 25                   | 0                   | 0                    |
| <b>seq1360</b> | Firmicutes    | Clostridia   | 0                   | 0                    | 0                   | 0                    |
| <b>seq1374</b> | Firmicutes    | Clostridia   | 0                   | 0                    | 0                   | 0                    |
| <b>seq1380</b> | Firmicutes    | Clostridia   | 0                   | 0                    | 0                   | 0                    |
| <b>seq1402</b> | Firmicutes    | Clostridia   | 0                   | 0                    | 0                   | 0                    |
| <b>seq1413</b> | Firmicutes    | Clostridia   | 0                   | 0                    | 0                   | 0                    |
| <b>seq1418</b> | Firmicutes    | Clostridia   | 0                   | 0                    | 0                   | 0                    |
| <b>seq1447</b> | Firmicutes    | Clostridia   | 0                   | 0                    | 0                   | 0                    |
| <b>seq1451</b> | Firmicutes    | Clostridia   | 0                   | 0                    | 17                  | 17                   |
| <b>seq1456</b> | Firmicutes    | Clostridia   | 0                   | 0                    | 0                   | 0                    |
| <b>seq1458</b> | Firmicutes    | Clostridia   | 0                   | 0                    | 0                   | 0                    |
| <b>seq1465</b> | Firmicutes    | Clostridia   | 0                   | 0                    | 0                   | 0                    |
| <b>seq1466</b> | Firmicutes    | Clostridia   | 0                   | 0                    | 0                   | 0                    |
| <b>seq1470</b> | Firmicutes    | Clostridia   | 0                   | 0                    | 0                   | 0                    |

Sequence Count Table

|                | <b>Phylum</b> | <b>Class</b> | <b>Subject23WK0</b> | <b>Subject23WK12</b> | <b>Subject24WK0</b> | <b>Subject24WK12</b> |
|----------------|---------------|--------------|---------------------|----------------------|---------------------|----------------------|
| <b>seq1261</b> | Firmicutes    | Clostridia   | 0                   | 0                    | 0                   | 0                    |
| <b>seq1262</b> | Firmicutes    | Clostridia   | 0                   | 0                    | 0                   | 0                    |
| <b>seq1266</b> | Firmicutes    | Clostridia   | 0                   | 0                    | 0                   | 0                    |
| <b>seq1267</b> | Firmicutes    | Clostridia   | 0                   | 0                    | 0                   | 0                    |
| <b>seq1271</b> | Firmicutes    | Clostridia   | 0                   | 0                    | 0                   | 0                    |
| <b>seq1273</b> | Firmicutes    | Clostridia   | 0                   | 0                    | 0                   | 0                    |
| <b>seq1276</b> | Firmicutes    | Clostridia   | 0                   | 0                    | 0                   | 0                    |
| <b>seq1279</b> | Firmicutes    | Clostridia   | 0                   | 0                    | 0                   | 0                    |
| <b>seq1286</b> | Firmicutes    | Clostridia   | 0                   | 0                    | 0                   | 0                    |
| <b>seq1292</b> | Firmicutes    | Clostridia   | 0                   | 0                    | 0                   | 0                    |
| <b>seq1295</b> | Firmicutes    | Clostridia   | 0                   | 0                    | 0                   | 0                    |
| <b>seq1304</b> | Firmicutes    | Clostridia   | 0                   | 0                    | 0                   | 0                    |
| <b>seq1309</b> | Firmicutes    | Clostridia   | 0                   | 0                    | 0                   | 0                    |
| <b>seq1322</b> | Firmicutes    | Clostridia   | 0                   | 0                    | 0                   | 0                    |
| <b>seq1328</b> | Firmicutes    | Clostridia   | 0                   | 0                    | 0                   | 0                    |
| <b>seq1350</b> | Firmicutes    | Clostridia   | 0                   | 0                    | 0                   | 0                    |
| <b>seq1351</b> | Firmicutes    | Clostridia   | 0                   | 0                    | 0                   | 0                    |
| <b>seq1358</b> | Firmicutes    | Clostridia   | 0                   | 0                    | 0                   | 0                    |
| <b>seq1359</b> | Firmicutes    | Clostridia   | 0                   | 0                    | 0                   | 0                    |
| <b>seq1360</b> | Firmicutes    | Clostridia   | 0                   | 0                    | 0                   | 0                    |
| <b>seq1374</b> | Firmicutes    | Clostridia   | 0                   | 0                    | 17                  | 12                   |
| <b>seq1380</b> | Firmicutes    | Clostridia   | 0                   | 0                    | 0                   | 0                    |
| <b>seq1402</b> | Firmicutes    | Clostridia   | 0                   | 0                    | 0                   | 0                    |
| <b>seq1413</b> | Firmicutes    | Clostridia   | 0                   | 0                    | 0                   | 0                    |
| <b>seq1418</b> | Firmicutes    | Clostridia   | 0                   | 0                    | 0                   | 0                    |
| <b>seq1447</b> | Firmicutes    | Clostridia   | 0                   | 0                    | 0                   | 0                    |
| <b>seq1451</b> | Firmicutes    | Clostridia   | 0                   | 0                    | 0                   | 0                    |
| <b>seq1456</b> | Firmicutes    | Clostridia   | 0                   | 0                    | 0                   | 0                    |
| <b>seq1458</b> | Firmicutes    | Clostridia   | 0                   | 0                    | 0                   | 0                    |
| <b>seq1465</b> | Firmicutes    | Clostridia   | 0                   | 0                    | 0                   | 0                    |
| <b>seq1466</b> | Firmicutes    | Clostridia   | 0                   | 0                    | 0                   | 0                    |
| <b>seq1470</b> | Firmicutes    | Clostridia   | 0                   | 0                    | 32                  | 0                    |

Sequence Count Table

|                | <b>Phylum</b> | <b>Class</b> | <b>Subject11WK0</b> | <b>Subject11WK12</b> | <b>Subject12WK0</b> | <b>Subject12WK12</b> |
|----------------|---------------|--------------|---------------------|----------------------|---------------------|----------------------|
| <b>seq1261</b> | Firmicutes    | Clostridia   | 0                   | 0                    | 0                   | 0                    |
| <b>seq1262</b> | Firmicutes    | Clostridia   | 0                   | 0                    | 0                   | 0                    |
| <b>seq1266</b> | Firmicutes    | Clostridia   | 0                   | 0                    | 0                   | 0                    |
| <b>seq1267</b> | Firmicutes    | Clostridia   | 0                   | 0                    | 0                   | 0                    |
| <b>seq1271</b> | Firmicutes    | Clostridia   | 0                   | 0                    | 0                   | 0                    |
| <b>seq1273</b> | Firmicutes    | Clostridia   | 0                   | 0                    | 0                   | 0                    |
| <b>seq1276</b> | Firmicutes    | Clostridia   | 0                   | 0                    | 0                   | 0                    |
| <b>seq1279</b> | Firmicutes    | Clostridia   | 0                   | 0                    | 0                   | 0                    |
| <b>seq1286</b> | Firmicutes    | Clostridia   | 0                   | 0                    | 0                   | 0                    |
| <b>seq1292</b> | Firmicutes    | Clostridia   | 0                   | 0                    | 0                   | 0                    |
| <b>seq1295</b> | Firmicutes    | Clostridia   | 0                   | 0                    | 0                   | 0                    |
| <b>seq1304</b> | Firmicutes    | Clostridia   | 0                   | 0                    | 0                   | 0                    |
| <b>seq1309</b> | Firmicutes    | Clostridia   | 0                   | 0                    | 0                   | 0                    |
| <b>seq1322</b> | Firmicutes    | Clostridia   | 0                   | 0                    | 0                   | 0                    |
| <b>seq1328</b> | Firmicutes    | Clostridia   | 0                   | 0                    | 0                   | 0                    |
| <b>seq1350</b> | Firmicutes    | Clostridia   | 0                   | 0                    | 0                   | 0                    |
| <b>seq1351</b> | Firmicutes    | Clostridia   | 0                   | 0                    | 0                   | 0                    |
| <b>seq1358</b> | Firmicutes    | Clostridia   | 0                   | 0                    | 0                   | 0                    |
| <b>seq1359</b> | Firmicutes    | Clostridia   | 0                   | 0                    | 0                   | 0                    |
| <b>seq1360</b> | Firmicutes    | Clostridia   | 0                   | 0                    | 0                   | 0                    |
| <b>seq1374</b> | Firmicutes    | Clostridia   | 16                  | 0                    | 0                   | 0                    |
| <b>seq1380</b> | Firmicutes    | Clostridia   | 0                   | 0                    | 0                   | 0                    |
| <b>seq1402</b> | Firmicutes    | Clostridia   | 0                   | 0                    | 0                   | 0                    |
| <b>seq1413</b> | Firmicutes    | Clostridia   | 0                   | 0                    | 0                   | 0                    |
| <b>seq1418</b> | Firmicutes    | Clostridia   | 0                   | 0                    | 0                   | 0                    |
| <b>seq1447</b> | Firmicutes    | Clostridia   | 0                   | 0                    | 0                   | 0                    |
| <b>seq1451</b> | Firmicutes    | Clostridia   | 0                   | 0                    | 0                   | 0                    |
| <b>seq1456</b> | Firmicutes    | Clostridia   | 0                   | 0                    | 0                   | 0                    |
| <b>seq1458</b> | Firmicutes    | Clostridia   | 0                   | 0                    | 0                   | 0                    |
| <b>seq1465</b> | Firmicutes    | Clostridia   | 0                   | 0                    | 0                   | 0                    |
| <b>seq1466</b> | Firmicutes    | Clostridia   | 0                   | 0                    | 0                   | 0                    |
| <b>seq1470</b> | Firmicutes    | Clostridia   | 0                   | 0                    | 0                   | 0                    |

Sequence Count Table

|                | <b>Phylum</b> | <b>Class</b> | <b>Subject25WK0</b> | <b>Subject25WK12</b> | <b>Subject38WK0</b> | <b>Subject38WK12</b> |
|----------------|---------------|--------------|---------------------|----------------------|---------------------|----------------------|
| <b>seq1261</b> | Firmicutes    | Clostridia   | 0                   | 0                    | 0                   | 0                    |
| <b>seq1262</b> | Firmicutes    | Clostridia   | 0                   | 0                    | 0                   | 0                    |
| <b>seq1266</b> | Firmicutes    | Clostridia   | 0                   | 0                    | 0                   | 0                    |
| <b>seq1267</b> | Firmicutes    | Clostridia   | 0                   | 0                    | 0                   | 0                    |
| <b>seq1271</b> | Firmicutes    | Clostridia   | 0                   | 0                    | 0                   | 0                    |
| <b>seq1273</b> | Firmicutes    | Clostridia   | 0                   | 0                    | 0                   | 0                    |
| <b>seq1276</b> | Firmicutes    | Clostridia   | 0                   | 0                    | 0                   | 0                    |
| <b>seq1279</b> | Firmicutes    | Clostridia   | 0                   | 0                    | 0                   | 0                    |
| <b>seq1286</b> | Firmicutes    | Clostridia   | 0                   | 0                    | 0                   | 0                    |
| <b>seq1292</b> | Firmicutes    | Clostridia   | 0                   | 0                    | 0                   | 0                    |
| <b>seq1295</b> | Firmicutes    | Clostridia   | 0                   | 0                    | 0                   | 0                    |
| <b>seq1304</b> | Firmicutes    | Clostridia   | 0                   | 0                    | 0                   | 0                    |
| <b>seq1309</b> | Firmicutes    | Clostridia   | 0                   | 0                    | 0                   | 0                    |
| <b>seq1322</b> | Firmicutes    | Clostridia   | 0                   | 0                    | 0                   | 0                    |
| <b>seq1328</b> | Firmicutes    | Clostridia   | 0                   | 0                    | 0                   | 0                    |
| <b>seq1350</b> | Firmicutes    | Clostridia   | 15                  | 0                    | 0                   | 0                    |
| <b>seq1351</b> | Firmicutes    | Clostridia   | 0                   | 0                    | 0                   | 0                    |
| <b>seq1358</b> | Firmicutes    | Clostridia   | 0                   | 0                    | 0                   | 0                    |
| <b>seq1359</b> | Firmicutes    | Clostridia   | 0                   | 0                    | 0                   | 0                    |
| <b>seq1360</b> | Firmicutes    | Clostridia   | 0                   | 0                    | 0                   | 0                    |
| <b>seq1374</b> | Firmicutes    | Clostridia   | 0                   | 0                    | 0                   | 0                    |
| <b>seq1380</b> | Firmicutes    | Clostridia   | 20                  | 0                    | 0                   | 0                    |
| <b>seq1402</b> | Firmicutes    | Clostridia   | 0                   | 0                    | 0                   | 0                    |
| <b>seq1413</b> | Firmicutes    | Clostridia   | 0                   | 0                    | 0                   | 0                    |
| <b>seq1418</b> | Firmicutes    | Clostridia   | 0                   | 0                    | 0                   | 0                    |
| <b>seq1447</b> | Firmicutes    | Clostridia   | 0                   | 0                    | 0                   | 0                    |
| <b>seq1451</b> | Firmicutes    | Clostridia   | 0                   | 0                    | 0                   | 0                    |
| <b>seq1456</b> | Firmicutes    | Clostridia   | 0                   | 0                    | 0                   | 0                    |
| <b>seq1458</b> | Firmicutes    | Clostridia   | 0                   | 0                    | 0                   | 0                    |
| <b>seq1465</b> | Firmicutes    | Clostridia   | 0                   | 0                    | 0                   | 0                    |
| <b>seq1466</b> | Firmicutes    | Clostridia   | 0                   | 0                    | 0                   | 0                    |
| <b>seq1470</b> | Firmicutes    | Clostridia   | 0                   | 0                    | 0                   | 0                    |

Sequence Count Table

|                | <b>Phylum</b> | <b>Class</b> | <b>Subject31WK0</b> | <b>Subject31WK12</b> | <b>Subject32WK0</b> | <b>Subject32WK12</b> |
|----------------|---------------|--------------|---------------------|----------------------|---------------------|----------------------|
| <b>seq1261</b> | Firmicutes    | Clostridia   | 0                   | 0                    | 0                   | 0                    |
| <b>seq1262</b> | Firmicutes    | Clostridia   | 0                   | 0                    | 0                   | 0                    |
| <b>seq1266</b> | Firmicutes    | Clostridia   | 0                   | 0                    | 0                   | 0                    |
| <b>seq1267</b> | Firmicutes    | Clostridia   | 0                   | 0                    | 0                   | 0                    |
| <b>seq1271</b> | Firmicutes    | Clostridia   | 0                   | 0                    | 0                   | 0                    |
| <b>seq1273</b> | Firmicutes    | Clostridia   | 0                   | 0                    | 0                   | 0                    |
| <b>seq1276</b> | Firmicutes    | Clostridia   | 0                   | 0                    | 0                   | 0                    |
| <b>seq1279</b> | Firmicutes    | Clostridia   | 0                   | 0                    | 0                   | 0                    |
| <b>seq1286</b> | Firmicutes    | Clostridia   | 0                   | 0                    | 0                   | 0                    |
| <b>seq1292</b> | Firmicutes    | Clostridia   | 0                   | 0                    | 0                   | 0                    |
| <b>seq1295</b> | Firmicutes    | Clostridia   | 0                   | 0                    | 0                   | 0                    |
| <b>seq1304</b> | Firmicutes    | Clostridia   | 0                   | 0                    | 0                   | 0                    |
| <b>seq1309</b> | Firmicutes    | Clostridia   | 0                   | 0                    | 0                   | 0                    |
| <b>seq1322</b> | Firmicutes    | Clostridia   | 0                   | 0                    | 0                   | 0                    |
| <b>seq1328</b> | Firmicutes    | Clostridia   | 0                   | 0                    | 0                   | 0                    |
| <b>seq1350</b> | Firmicutes    | Clostridia   | 0                   | 0                    | 0                   | 0                    |
| <b>seq1351</b> | Firmicutes    | Clostridia   | 0                   | 0                    | 0                   | 0                    |
| <b>seq1358</b> | Firmicutes    | Clostridia   | 0                   | 0                    | 0                   | 0                    |
| <b>seq1359</b> | Firmicutes    | Clostridia   | 0                   | 0                    | 0                   | 0                    |
| <b>seq1360</b> | Firmicutes    | Clostridia   | 0                   | 0                    | 0                   | 0                    |
| <b>seq1374</b> | Firmicutes    | Clostridia   | 0                   | 0                    | 0                   | 0                    |
| <b>seq1380</b> | Firmicutes    | Clostridia   | 0                   | 0                    | 0                   | 0                    |
| <b>seq1402</b> | Firmicutes    | Clostridia   | 0                   | 0                    | 0                   | 0                    |
| <b>seq1413</b> | Firmicutes    | Clostridia   | 0                   | 0                    | 0                   | 0                    |
| <b>seq1418</b> | Firmicutes    | Clostridia   | 0                   | 0                    | 0                   | 0                    |
| <b>seq1447</b> | Firmicutes    | Clostridia   | 0                   | 0                    | 0                   | 0                    |
| <b>seq1451</b> | Firmicutes    | Clostridia   | 0                   | 0                    | 0                   | 0                    |
| <b>seq1456</b> | Firmicutes    | Clostridia   | 0                   | 0                    | 0                   | 0                    |
| <b>seq1458</b> | Firmicutes    | Clostridia   | 0                   | 0                    | 0                   | 0                    |
| <b>seq1465</b> | Firmicutes    | Clostridia   | 0                   | 0                    | 0                   | 0                    |
| <b>seq1466</b> | Firmicutes    | Clostridia   | 0                   | 0                    | 0                   | 0                    |
| <b>seq1470</b> | Firmicutes    | Clostridia   | 0                   | 0                    | 0                   | 0                    |

Sequence Count Table

|                | <b>Phylum</b> | <b>Class</b> | <b>Subject13WK0</b> | <b>Subject13WK12</b> | <b>Subject39WK0</b> | <b>Subject39WK12</b> |
|----------------|---------------|--------------|---------------------|----------------------|---------------------|----------------------|
| <b>seq1261</b> | Firmicutes    | Clostridia   | 0                   | 0                    | 0                   | 0                    |
| <b>seq1262</b> | Firmicutes    | Clostridia   | 0                   | 0                    | 0                   | 0                    |
| <b>seq1266</b> | Firmicutes    | Clostridia   | 0                   | 0                    | 0                   | 0                    |
| <b>seq1267</b> | Firmicutes    | Clostridia   | 0                   | 0                    | 0                   | 0                    |
| <b>seq1271</b> | Firmicutes    | Clostridia   | 0                   | 0                    | 0                   | 0                    |
| <b>seq1273</b> | Firmicutes    | Clostridia   | 0                   | 0                    | 0                   | 0                    |
| <b>seq1276</b> | Firmicutes    | Clostridia   | 0                   | 0                    | 0                   | 0                    |
| <b>seq1279</b> | Firmicutes    | Clostridia   | 0                   | 0                    | 0                   | 0                    |
| <b>seq1286</b> | Firmicutes    | Clostridia   | 0                   | 0                    | 0                   | 0                    |
| <b>seq1292</b> | Firmicutes    | Clostridia   | 0                   | 0                    | 0                   | 0                    |
| <b>seq1295</b> | Firmicutes    | Clostridia   | 0                   | 0                    | 0                   | 0                    |
| <b>seq1304</b> | Firmicutes    | Clostridia   | 0                   | 0                    | 0                   | 0                    |
| <b>seq1309</b> | Firmicutes    | Clostridia   | 0                   | 0                    | 0                   | 0                    |
| <b>seq1322</b> | Firmicutes    | Clostridia   | 0                   | 0                    | 0                   | 0                    |
| <b>seq1328</b> | Firmicutes    | Clostridia   | 0                   | 0                    | 0                   | 0                    |
| <b>seq1350</b> | Firmicutes    | Clostridia   | 15                  | 0                    | 0                   | 0                    |
| <b>seq1351</b> | Firmicutes    | Clostridia   | 0                   | 0                    | 0                   | 0                    |
| <b>seq1358</b> | Firmicutes    | Clostridia   | 0                   | 0                    | 0                   | 0                    |
| <b>seq1359</b> | Firmicutes    | Clostridia   | 0                   | 0                    | 0                   | 0                    |
| <b>seq1360</b> | Firmicutes    | Clostridia   | 0                   | 47                   | 0                   | 0                    |
| <b>seq1374</b> | Firmicutes    | Clostridia   | 0                   | 0                    | 0                   | 0                    |
| <b>seq1380</b> | Firmicutes    | Clostridia   | 9                   | 15                   | 0                   | 0                    |
| <b>seq1402</b> | Firmicutes    | Clostridia   | 0                   | 0                    | 0                   | 0                    |
| <b>seq1413</b> | Firmicutes    | Clostridia   | 0                   | 0                    | 0                   | 0                    |
| <b>seq1418</b> | Firmicutes    | Clostridia   | 0                   | 0                    | 0                   | 0                    |
| <b>seq1447</b> | Firmicutes    | Clostridia   | 0                   | 0                    | 0                   | 0                    |
| <b>seq1451</b> | Firmicutes    | Clostridia   | 0                   | 0                    | 0                   | 0                    |
| <b>seq1456</b> | Firmicutes    | Clostridia   | 0                   | 0                    | 0                   | 0                    |
| <b>seq1458</b> | Firmicutes    | Clostridia   | 0                   | 0                    | 0                   | 0                    |
| <b>seq1465</b> | Firmicutes    | Clostridia   | 0                   | 0                    | 0                   | 0                    |
| <b>seq1466</b> | Firmicutes    | Clostridia   | 0                   | 0                    | 0                   | 0                    |
| <b>seq1470</b> | Firmicutes    | Clostridia   | 0                   | 0                    | 0                   | 0                    |

Sequence Count Table

|                | <b>Phylum</b> | <b>Class</b> | <b>Subject26WK0</b> | <b>Subject26WK12</b> | <b>Subject14WK0</b> | <b>Subject14WK12</b> |
|----------------|---------------|--------------|---------------------|----------------------|---------------------|----------------------|
| <b>seq1261</b> | Firmicutes    | Clostridia   | 0                   | 0                    | 0                   | 0                    |
| <b>seq1262</b> | Firmicutes    | Clostridia   | 0                   | 0                    | 0                   | 0                    |
| <b>seq1266</b> | Firmicutes    | Clostridia   | 0                   | 0                    | 0                   | 0                    |
| <b>seq1267</b> | Firmicutes    | Clostridia   | 0                   | 0                    | 0                   | 0                    |
| <b>seq1271</b> | Firmicutes    | Clostridia   | 0                   | 0                    | 0                   | 0                    |
| <b>seq1273</b> | Firmicutes    | Clostridia   | 0                   | 0                    | 0                   | 0                    |
| <b>seq1276</b> | Firmicutes    | Clostridia   | 0                   | 0                    | 0                   | 0                    |
| <b>seq1279</b> | Firmicutes    | Clostridia   | 0                   | 0                    | 0                   | 0                    |
| <b>seq1286</b> | Firmicutes    | Clostridia   | 0                   | 0                    | 0                   | 0                    |
| <b>seq1292</b> | Firmicutes    | Clostridia   | 30                  | 28                   | 0                   | 0                    |
| <b>seq1295</b> | Firmicutes    | Clostridia   | 0                   | 0                    | 0                   | 0                    |
| <b>seq1304</b> | Firmicutes    | Clostridia   | 0                   | 0                    | 0                   | 0                    |
| <b>seq1309</b> | Firmicutes    | Clostridia   | 0                   | 0                    | 0                   | 0                    |
| <b>seq1322</b> | Firmicutes    | Clostridia   | 7                   | 19                   | 0                   | 0                    |
| <b>seq1328</b> | Firmicutes    | Clostridia   | 0                   | 0                    | 0                   | 0                    |
| <b>seq1350</b> | Firmicutes    | Clostridia   | 0                   | 0                    | 0                   | 0                    |
| <b>seq1351</b> | Firmicutes    | Clostridia   | 0                   | 0                    | 0                   | 0                    |
| <b>seq1358</b> | Firmicutes    | Clostridia   | 0                   | 0                    | 0                   | 0                    |
| <b>seq1359</b> | Firmicutes    | Clostridia   | 0                   | 0                    | 0                   | 0                    |
| <b>seq1360</b> | Firmicutes    | Clostridia   | 0                   | 0                    | 0                   | 0                    |
| <b>seq1374</b> | Firmicutes    | Clostridia   | 0                   | 0                    | 0                   | 0                    |
| <b>seq1380</b> | Firmicutes    | Clostridia   | 0                   | 0                    | 0                   | 0                    |
| <b>seq1402</b> | Firmicutes    | Clostridia   | 0                   | 0                    | 0                   | 0                    |
| <b>seq1413</b> | Firmicutes    | Clostridia   | 0                   | 0                    | 0                   | 0                    |
| <b>seq1418</b> | Firmicutes    | Clostridia   | 0                   | 0                    | 0                   | 0                    |
| <b>seq1447</b> | Firmicutes    | Clostridia   | 0                   | 0                    | 0                   | 0                    |
| <b>seq1451</b> | Firmicutes    | Clostridia   | 0                   | 0                    | 0                   | 0                    |
| <b>seq1456</b> | Firmicutes    | Clostridia   | 14                  | 4                    | 0                   | 0                    |
| <b>seq1458</b> | Firmicutes    | Clostridia   | 0                   | 0                    | 0                   | 0                    |
| <b>seq1465</b> | Firmicutes    | Clostridia   | 0                   | 0                    | 0                   | 0                    |
| <b>seq1466</b> | Firmicutes    | Clostridia   | 0                   | 0                    | 0                   | 0                    |
| <b>seq1470</b> | Firmicutes    | Clostridia   | 0                   | 0                    | 0                   | 0                    |

Sequence Count Table

|                | <b>Phylum</b> | <b>Class</b> | <b>Subject27WK0</b> | <b>Subject27WK12</b> | <b>Subject15WK0</b> | <b>Subject15WK12</b> |
|----------------|---------------|--------------|---------------------|----------------------|---------------------|----------------------|
| <b>seq1261</b> | Firmicutes    | Clostridia   | 0                   | 0                    | 0                   | 0                    |
| <b>seq1262</b> | Firmicutes    | Clostridia   | 0                   | 0                    | 0                   | 0                    |
| <b>seq1266</b> | Firmicutes    | Clostridia   | 0                   | 0                    | 0                   | 0                    |
| <b>seq1267</b> | Firmicutes    | Clostridia   | 0                   | 0                    | 0                   | 0                    |
| <b>seq1271</b> | Firmicutes    | Clostridia   | 0                   | 0                    | 0                   | 0                    |
| <b>seq1273</b> | Firmicutes    | Clostridia   | 0                   | 0                    | 0                   | 0                    |
| <b>seq1276</b> | Firmicutes    | Clostridia   | 0                   | 0                    | 0                   | 0                    |
| <b>seq1279</b> | Firmicutes    | Clostridia   | 0                   | 0                    | 0                   | 0                    |
| <b>seq1286</b> | Firmicutes    | Clostridia   | 0                   | 0                    | 0                   | 0                    |
| <b>seq1292</b> | Firmicutes    | Clostridia   | 0                   | 0                    | 0                   | 0                    |
| <b>seq1295</b> | Firmicutes    | Clostridia   | 0                   | 0                    | 0                   | 0                    |
| <b>seq1304</b> | Firmicutes    | Clostridia   | 0                   | 0                    | 0                   | 0                    |
| <b>seq1309</b> | Firmicutes    | Clostridia   | 0                   | 0                    | 0                   | 0                    |
| <b>seq1322</b> | Firmicutes    | Clostridia   | 0                   | 0                    | 0                   | 0                    |
| <b>seq1328</b> | Firmicutes    | Clostridia   | 0                   | 0                    | 0                   | 0                    |
| <b>seq1350</b> | Firmicutes    | Clostridia   | 0                   | 0                    | 0                   | 0                    |
| <b>seq1351</b> | Firmicutes    | Clostridia   | 0                   | 0                    | 0                   | 0                    |
| <b>seq1358</b> | Firmicutes    | Clostridia   | 0                   | 0                    | 0                   | 0                    |
| <b>seq1359</b> | Firmicutes    | Clostridia   | 0                   | 0                    | 0                   | 0                    |
| <b>seq1360</b> | Firmicutes    | Clostridia   | 0                   | 0                    | 0                   | 0                    |
| <b>seq1374</b> | Firmicutes    | Clostridia   | 0                   | 0                    | 0                   | 0                    |
| <b>seq1380</b> | Firmicutes    | Clostridia   | 0                   | 0                    | 0                   | 0                    |
| <b>seq1402</b> | Firmicutes    | Clostridia   | 0                   | 0                    | 0                   | 0                    |
| <b>seq1413</b> | Firmicutes    | Clostridia   | 0                   | 0                    | 0                   | 0                    |
| <b>seq1418</b> | Firmicutes    | Clostridia   | 0                   | 0                    | 0                   | 0                    |
| <b>seq1447</b> | Firmicutes    | Clostridia   | 0                   | 0                    | 0                   | 0                    |
| <b>seq1451</b> | Firmicutes    | Clostridia   | 0                   | 0                    | 0                   | 0                    |
| <b>seq1456</b> | Firmicutes    | Clostridia   | 0                   | 0                    | 0                   | 0                    |
| <b>seq1458</b> | Firmicutes    | Clostridia   | 0                   | 0                    | 0                   | 0                    |
| <b>seq1465</b> | Firmicutes    | Clostridia   | 0                   | 0                    | 0                   | 0                    |
| <b>seq1466</b> | Firmicutes    | Clostridia   | 0                   | 0                    | 0                   | 0                    |
| <b>seq1470</b> | Firmicutes    | Clostridia   | 0                   | 0                    | 0                   | 0                    |



Sequence Count Table

|                | <b>Phylum</b> | <b>Class</b> | <b>Δ</b> |  |  |  |
|----------------|---------------|--------------|----------|--|--|--|
| <b>seq1261</b> | Firmicutes    | Clostridia   |          |  |  |  |
| <b>seq1262</b> | Firmicutes    | Clostridia   |          |  |  |  |
| <b>seq1266</b> | Firmicutes    | Clostridia   |          |  |  |  |
| <b>seq1267</b> | Firmicutes    | Clostridia   |          |  |  |  |
| <b>seq1271</b> | Firmicutes    | Clostridia   |          |  |  |  |
| <b>seq1273</b> | Firmicutes    | Clostridia   |          |  |  |  |
| <b>seq1276</b> | Firmicutes    | Clostridia   |          |  |  |  |
| <b>seq1279</b> | Firmicutes    | Clostridia   |          |  |  |  |
| <b>seq1286</b> | Firmicutes    | Clostridia   |          |  |  |  |
| <b>seq1292</b> | Firmicutes    | Clostridia   |          |  |  |  |
| <b>seq1295</b> | Firmicutes    | Clostridia   |          |  |  |  |
| <b>seq1304</b> | Firmicutes    | Clostridia   |          |  |  |  |
| <b>seq1309</b> | Firmicutes    | Clostridia   |          |  |  |  |
| <b>seq1322</b> | Firmicutes    | Clostridia   |          |  |  |  |
| <b>seq1328</b> | Firmicutes    | Clostridia   |          |  |  |  |
| <b>seq1350</b> | Firmicutes    | Clostridia   |          |  |  |  |
| <b>seq1351</b> | Firmicutes    | Clostridia   |          |  |  |  |
| <b>seq1358</b> | Firmicutes    | Clostridia   |          |  |  |  |
| <b>seq1359</b> | Firmicutes    | Clostridia   |          |  |  |  |
| <b>seq1360</b> | Firmicutes    | Clostridia   |          |  |  |  |
| <b>seq1374</b> | Firmicutes    | Clostridia   |          |  |  |  |
| <b>seq1380</b> | Firmicutes    | Clostridia   |          |  |  |  |
| <b>seq1402</b> | Firmicutes    | Clostridia   |          |  |  |  |
| <b>seq1413</b> | Firmicutes    | Clostridia   |          |  |  |  |
| <b>seq1418</b> | Firmicutes    | Clostridia   |          |  |  |  |
| <b>seq1447</b> | Firmicutes    | Clostridia   |          |  |  |  |
| <b>seq1451</b> | Firmicutes    | Clostridia   |          |  |  |  |
| <b>seq1456</b> | Firmicutes    | Clostridia   |          |  |  |  |
| <b>seq1458</b> | Firmicutes    | Clostridia   |          |  |  |  |
| <b>seq1465</b> | Firmicutes    | Clostridia   |          |  |  |  |
| <b>seq1466</b> | Firmicutes    | Clostridia   |          |  |  |  |
| <b>seq1470</b> | Firmicutes    | Clostridia   |          |  |  |  |

Sequence Count Table

|                | <b>Phylum</b> | <b>Class</b> | <b>Order</b>  | <b>Family</b>   |
|----------------|---------------|--------------|---------------|-----------------|
| <b>seq1473</b> | Firmicutes    | Clostridia   | Clostridiales | Lachnospiraceae |
| <b>seq1485</b> | Firmicutes    | Clostridia   | Clostridiales | Lachnospiraceae |
| <b>seq1489</b> | Firmicutes    | Clostridia   | Clostridiales | Lachnospiraceae |
| <b>seq1502</b> | Firmicutes    | Clostridia   | Clostridiales | Lachnospiraceae |
| <b>seq1505</b> | Firmicutes    | Clostridia   | Clostridiales | Lachnospiraceae |
| <b>seq1530</b> | Firmicutes    | Clostridia   | Clostridiales | Lachnospiraceae |
| <b>seq1531</b> | Firmicutes    | Clostridia   | Clostridiales | Lachnospiraceae |
| <b>seq1537</b> | Firmicutes    | Clostridia   | Clostridiales | Lachnospiraceae |
| <b>seq1540</b> | Firmicutes    | Clostridia   | Clostridiales | Lachnospiraceae |
| <b>seq1544</b> | Firmicutes    | Clostridia   | Clostridiales | Lachnospiraceae |
| <b>seq1563</b> | Firmicutes    | Clostridia   | Clostridiales | Lachnospiraceae |
| <b>seq1565</b> | Firmicutes    | Clostridia   | Clostridiales | Lachnospiraceae |
| <b>seq1571</b> | Firmicutes    | Clostridia   | Clostridiales | Lachnospiraceae |
| <b>seq1580</b> | Firmicutes    | Clostridia   | Clostridiales | Lachnospiraceae |
| <b>seq1591</b> | Firmicutes    | Clostridia   | Clostridiales | Lachnospiraceae |
| <b>seq1602</b> | Firmicutes    | Clostridia   | Clostridiales | Lachnospiraceae |
| <b>seq1610</b> | Firmicutes    | Clostridia   | Clostridiales | Lachnospiraceae |
| <b>seq1620</b> | Firmicutes    | Clostridia   | Clostridiales | Lachnospiraceae |
| <b>seq1627</b> | Firmicutes    | Clostridia   | Clostridiales | Lachnospiraceae |
| <b>seq1634</b> | Firmicutes    | Clostridia   | Clostridiales | Lachnospiraceae |
| <b>seq1637</b> | Firmicutes    | Clostridia   | Clostridiales | Lachnospiraceae |
| <b>seq1642</b> | Firmicutes    | Clostridia   | Clostridiales | Lachnospiraceae |
| <b>seq1646</b> | Firmicutes    | Clostridia   | Clostridiales | Lachnospiraceae |
| <b>seq1656</b> | Firmicutes    | Clostridia   | Clostridiales | Lachnospiraceae |
| <b>seq1667</b> | Firmicutes    | Clostridia   | Clostridiales | Lachnospiraceae |
| <b>seq1677</b> | Firmicutes    | Clostridia   | Clostridiales | Lachnospiraceae |
| <b>seq1678</b> | Firmicutes    | Clostridia   | Clostridiales | Lachnospiraceae |
| <b>seq1705</b> | Firmicutes    | Clostridia   | Clostridiales | Lachnospiraceae |
| <b>seq1706</b> | Firmicutes    | Clostridia   | Clostridiales | Lachnospiraceae |
| <b>seq1714</b> | Firmicutes    | Clostridia   | Clostridiales | Lachnospiraceae |
| <b>seq1720</b> | Firmicutes    | Clostridia   | Clostridiales | Lachnospiraceae |
| <b>seq1731</b> | Firmicutes    | Clostridia   | Clostridiales | Lachnospiraceae |

Sequence Count Table

|                | <b>Phylum</b> | <b>Class</b> | <b>Genus</b> | <b>Species</b> |
|----------------|---------------|--------------|--------------|----------------|
| <b>seq1473</b> | Firmicutes    | Clostridia   |              |                |
| <b>seq1485</b> | Firmicutes    | Clostridia   |              |                |
| <b>seq1489</b> | Firmicutes    | Clostridia   |              |                |
| <b>seq1502</b> | Firmicutes    | Clostridia   |              |                |
| <b>seq1505</b> | Firmicutes    | Clostridia   |              |                |
| <b>seq1530</b> | Firmicutes    | Clostridia   |              |                |
| <b>seq1531</b> | Firmicutes    | Clostridia   |              |                |
| <b>seq1537</b> | Firmicutes    | Clostridia   |              |                |
| <b>seq1540</b> | Firmicutes    | Clostridia   |              |                |
| <b>seq1544</b> | Firmicutes    | Clostridia   |              |                |
| <b>seq1563</b> | Firmicutes    | Clostridia   |              |                |
| <b>seq1565</b> | Firmicutes    | Clostridia   |              |                |
| <b>seq1571</b> | Firmicutes    | Clostridia   |              |                |
| <b>seq1580</b> | Firmicutes    | Clostridia   |              |                |
| <b>seq1591</b> | Firmicutes    | Clostridia   |              |                |
| <b>seq1602</b> | Firmicutes    | Clostridia   |              |                |
| <b>seq1610</b> | Firmicutes    | Clostridia   |              |                |
| <b>seq1620</b> | Firmicutes    | Clostridia   |              |                |
| <b>seq1627</b> | Firmicutes    | Clostridia   |              |                |
| <b>seq1634</b> | Firmicutes    | Clostridia   |              |                |
| <b>seq1637</b> | Firmicutes    | Clostridia   |              |                |
| <b>seq1642</b> | Firmicutes    | Clostridia   |              |                |
| <b>seq1646</b> | Firmicutes    | Clostridia   |              |                |
| <b>seq1656</b> | Firmicutes    | Clostridia   |              |                |
| <b>seq1667</b> | Firmicutes    | Clostridia   |              |                |
| <b>seq1677</b> | Firmicutes    | Clostridia   |              |                |
| <b>seq1678</b> | Firmicutes    | Clostridia   |              |                |
| <b>seq1705</b> | Firmicutes    | Clostridia   |              |                |
| <b>seq1706</b> | Firmicutes    | Clostridia   |              |                |
| <b>seq1714</b> | Firmicutes    | Clostridia   |              |                |
| <b>seq1720</b> | Firmicutes    | Clostridia   |              |                |
| <b>seq1731</b> | Firmicutes    | Clostridia   |              |                |

Sequence Count Table

|                | <b>Phylum</b> | <b>Class</b> | <b>Subject34WK0</b> | <b>Subject34WK12</b> | <b>Subject16WK0</b> | <b>Subject16WK12</b> |
|----------------|---------------|--------------|---------------------|----------------------|---------------------|----------------------|
| <b>seq1473</b> | Firmicutes    | Clostridia   | 0                   | 0                    | 0                   | 0                    |
| <b>seq1485</b> | Firmicutes    | Clostridia   | 0                   | 0                    | 0                   | 0                    |
| <b>seq1489</b> | Firmicutes    | Clostridia   | 0                   | 0                    | 0                   | 0                    |
| <b>seq1502</b> | Firmicutes    | Clostridia   | 0                   | 0                    | 0                   | 0                    |
| <b>seq1505</b> | Firmicutes    | Clostridia   | 0                   | 0                    | 0                   | 0                    |
| <b>seq1530</b> | Firmicutes    | Clostridia   | 0                   | 0                    | 0                   | 0                    |
| <b>seq1531</b> | Firmicutes    | Clostridia   | 0                   | 0                    | 0                   | 0                    |
| <b>seq1537</b> | Firmicutes    | Clostridia   | 0                   | 0                    | 0                   | 0                    |
| <b>seq1540</b> | Firmicutes    | Clostridia   | 0                   | 0                    | 0                   | 0                    |
| <b>seq1544</b> | Firmicutes    | Clostridia   | 0                   | 0                    | 0                   | 0                    |
| <b>seq1563</b> | Firmicutes    | Clostridia   | 0                   | 0                    | 0                   | 0                    |
| <b>seq1565</b> | Firmicutes    | Clostridia   | 0                   | 0                    | 0                   | 0                    |
| <b>seq1571</b> | Firmicutes    | Clostridia   | 0                   | 0                    | 0                   | 0                    |
| <b>seq1580</b> | Firmicutes    | Clostridia   | 0                   | 0                    | 0                   | 0                    |
| <b>seq1591</b> | Firmicutes    | Clostridia   | 0                   | 0                    | 0                   | 0                    |
| <b>seq1602</b> | Firmicutes    | Clostridia   | 0                   | 0                    | 0                   | 0                    |
| <b>seq1610</b> | Firmicutes    | Clostridia   | 0                   | 0                    | 0                   | 0                    |
| <b>seq1620</b> | Firmicutes    | Clostridia   | 0                   | 0                    | 0                   | 0                    |
| <b>seq1627</b> | Firmicutes    | Clostridia   | 0                   | 0                    | 0                   | 0                    |
| <b>seq1634</b> | Firmicutes    | Clostridia   | 0                   | 0                    | 0                   | 0                    |
| <b>seq1637</b> | Firmicutes    | Clostridia   | 0                   | 0                    | 0                   | 0                    |
| <b>seq1642</b> | Firmicutes    | Clostridia   | 0                   | 0                    | 0                   | 0                    |
| <b>seq1646</b> | Firmicutes    | Clostridia   | 0                   | 0                    | 0                   | 0                    |
| <b>seq1656</b> | Firmicutes    | Clostridia   | 0                   | 0                    | 0                   | 15                   |
| <b>seq1667</b> | Firmicutes    | Clostridia   | 0                   | 0                    | 0                   | 0                    |
| <b>seq1677</b> | Firmicutes    | Clostridia   | 0                   | 0                    | 0                   | 0                    |
| <b>seq1678</b> | Firmicutes    | Clostridia   | 0                   | 0                    | 0                   | 0                    |
| <b>seq1705</b> | Firmicutes    | Clostridia   | 0                   | 0                    | 0                   | 0                    |
| <b>seq1706</b> | Firmicutes    | Clostridia   | 0                   | 0                    | 0                   | 0                    |
| <b>seq1714</b> | Firmicutes    | Clostridia   | 0                   | 0                    | 0                   | 0                    |
| <b>seq1720</b> | Firmicutes    | Clostridia   | 0                   | 0                    | 0                   | 0                    |
| <b>seq1731</b> | Firmicutes    | Clostridia   | 0                   | 0                    | 0                   | 0                    |

Sequence Count Table

|                | <b>Phylum</b> | <b>Class</b> | <b>Subject17WK0</b> | <b>Subject17WK12</b> | <b>Subject1WK0</b> | <b>Subject1WK12</b> |
|----------------|---------------|--------------|---------------------|----------------------|--------------------|---------------------|
| <b>seq1473</b> | Firmicutes    | Clostridia   | 0                   | 0                    | 20                 | 11                  |
| <b>seq1485</b> | Firmicutes    | Clostridia   | 0                   | 0                    | 0                  | 0                   |
| <b>seq1489</b> | Firmicutes    | Clostridia   | 0                   | 0                    | 0                  | 0                   |
| <b>seq1502</b> | Firmicutes    | Clostridia   | 0                   | 0                    | 0                  | 0                   |
| <b>seq1505</b> | Firmicutes    | Clostridia   | 0                   | 0                    | 0                  | 0                   |
| <b>seq1530</b> | Firmicutes    | Clostridia   | 0                   | 0                    | 0                  | 0                   |
| <b>seq1531</b> | Firmicutes    | Clostridia   | 0                   | 0                    | 0                  | 0                   |
| <b>seq1537</b> | Firmicutes    | Clostridia   | 0                   | 0                    | 0                  | 0                   |
| <b>seq1540</b> | Firmicutes    | Clostridia   | 0                   | 0                    | 0                  | 0                   |
| <b>seq1544</b> | Firmicutes    | Clostridia   | 0                   | 0                    | 0                  | 0                   |
| <b>seq1563</b> | Firmicutes    | Clostridia   | 0                   | 0                    | 0                  | 0                   |
| <b>seq1565</b> | Firmicutes    | Clostridia   | 0                   | 0                    | 0                  | 0                   |
| <b>seq1571</b> | Firmicutes    | Clostridia   | 0                   | 0                    | 0                  | 0                   |
| <b>seq1580</b> | Firmicutes    | Clostridia   | 0                   | 0                    | 0                  | 0                   |
| <b>seq1591</b> | Firmicutes    | Clostridia   | 0                   | 0                    | 0                  | 0                   |
| <b>seq1602</b> | Firmicutes    | Clostridia   | 0                   | 0                    | 0                  | 0                   |
| <b>seq1610</b> | Firmicutes    | Clostridia   | 0                   | 0                    | 0                  | 0                   |
| <b>seq1620</b> | Firmicutes    | Clostridia   | 0                   | 0                    | 0                  | 0                   |
| <b>seq1627</b> | Firmicutes    | Clostridia   | 0                   | 0                    | 0                  | 0                   |
| <b>seq1634</b> | Firmicutes    | Clostridia   | 0                   | 0                    | 0                  | 0                   |
| <b>seq1637</b> | Firmicutes    | Clostridia   | 0                   | 0                    | 0                  | 0                   |
| <b>seq1642</b> | Firmicutes    | Clostridia   | 0                   | 0                    | 0                  | 16                  |
| <b>seq1646</b> | Firmicutes    | Clostridia   | 0                   | 0                    | 0                  | 0                   |
| <b>seq1656</b> | Firmicutes    | Clostridia   | 0                   | 0                    | 0                  | 0                   |
| <b>seq1667</b> | Firmicutes    | Clostridia   | 0                   | 0                    | 0                  | 0                   |
| <b>seq1677</b> | Firmicutes    | Clostridia   | 0                   | 0                    | 0                  | 0                   |
| <b>seq1678</b> | Firmicutes    | Clostridia   | 0                   | 0                    | 0                  | 0                   |
| <b>seq1705</b> | Firmicutes    | Clostridia   | 0                   | 0                    | 12                 | 0                   |
| <b>seq1706</b> | Firmicutes    | Clostridia   | 0                   | 0                    | 0                  | 0                   |
| <b>seq1714</b> | Firmicutes    | Clostridia   | 0                   | 0                    | 0                  | 0                   |
| <b>seq1720</b> | Firmicutes    | Clostridia   | 0                   | 0                    | 0                  | 0                   |
| <b>seq1731</b> | Firmicutes    | Clostridia   | 0                   | 0                    | 0                  | 0                   |

Sequence Count Table

|                | <b>Phylum</b> | <b>Class</b> | <b>Subject2WK0</b> | <b>Subject2WK12</b> | <b>Subject3WK0</b> | <b>Subject3WK12</b> |
|----------------|---------------|--------------|--------------------|---------------------|--------------------|---------------------|
| <b>seq1473</b> | Firmicutes    | Clostridia   | 0                  | 0                   | 0                  | 0                   |
| <b>seq1485</b> | Firmicutes    | Clostridia   | 0                  | 0                   | 0                  | 0                   |
| <b>seq1489</b> | Firmicutes    | Clostridia   | 0                  | 0                   | 0                  | 0                   |
| <b>seq1502</b> | Firmicutes    | Clostridia   | 0                  | 0                   | 0                  | 0                   |
| <b>seq1505</b> | Firmicutes    | Clostridia   | 0                  | 0                   | 0                  | 0                   |
| <b>seq1530</b> | Firmicutes    | Clostridia   | 0                  | 0                   | 0                  | 0                   |
| <b>seq1531</b> | Firmicutes    | Clostridia   | 0                  | 0                   | 0                  | 0                   |
| <b>seq1537</b> | Firmicutes    | Clostridia   | 0                  | 0                   | 0                  | 0                   |
| <b>seq1540</b> | Firmicutes    | Clostridia   | 0                  | 0                   | 0                  | 0                   |
| <b>seq1544</b> | Firmicutes    | Clostridia   | 0                  | 0                   | 0                  | 0                   |
| <b>seq1563</b> | Firmicutes    | Clostridia   | 0                  | 0                   | 0                  | 0                   |
| <b>seq1565</b> | Firmicutes    | Clostridia   | 0                  | 0                   | 0                  | 0                   |
| <b>seq1571</b> | Firmicutes    | Clostridia   | 0                  | 0                   | 0                  | 0                   |
| <b>seq1580</b> | Firmicutes    | Clostridia   | 0                  | 0                   | 0                  | 0                   |
| <b>seq1591</b> | Firmicutes    | Clostridia   | 0                  | 0                   | 0                  | 0                   |
| <b>seq1602</b> | Firmicutes    | Clostridia   | 0                  | 0                   | 0                  | 0                   |
| <b>seq1610</b> | Firmicutes    | Clostridia   | 0                  | 0                   | 0                  | 0                   |
| <b>seq1620</b> | Firmicutes    | Clostridia   | 0                  | 0                   | 0                  | 0                   |
| <b>seq1627</b> | Firmicutes    | Clostridia   | 0                  | 0                   | 0                  | 0                   |
| <b>seq1634</b> | Firmicutes    | Clostridia   | 0                  | 0                   | 0                  | 0                   |
| <b>seq1637</b> | Firmicutes    | Clostridia   | 0                  | 0                   | 0                  | 0                   |
| <b>seq1642</b> | Firmicutes    | Clostridia   | 0                  | 0                   | 0                  | 0                   |
| <b>seq1646</b> | Firmicutes    | Clostridia   | 0                  | 0                   | 0                  | 0                   |
| <b>seq1656</b> | Firmicutes    | Clostridia   | 0                  | 0                   | 0                  | 0                   |
| <b>seq1667</b> | Firmicutes    | Clostridia   | 0                  | 0                   | 0                  | 0                   |
| <b>seq1677</b> | Firmicutes    | Clostridia   | 0                  | 0                   | 0                  | 0                   |
| <b>seq1678</b> | Firmicutes    | Clostridia   | 0                  | 0                   | 0                  | 0                   |
| <b>seq1705</b> | Firmicutes    | Clostridia   | 0                  | 0                   | 0                  | 0                   |
| <b>seq1706</b> | Firmicutes    | Clostridia   | 0                  | 0                   | 0                  | 0                   |
| <b>seq1714</b> | Firmicutes    | Clostridia   | 0                  | 0                   | 0                  | 0                   |
| <b>seq1720</b> | Firmicutes    | Clostridia   | 0                  | 0                   | 0                  | 0                   |
| <b>seq1731</b> | Firmicutes    | Clostridia   | 0                  | 0                   | 0                  | 0                   |

Sequence Count Table

|                | <b>Phylum</b> | <b>Class</b> | <b>Subject4WK0</b> | <b>Subject4WK12</b> | <b>Subject5WK0</b> | <b>Subject5WK12</b> |
|----------------|---------------|--------------|--------------------|---------------------|--------------------|---------------------|
| <b>seq1473</b> | Firmicutes    | Clostridia   | 0                  | 0                   | 0                  | 0                   |
| <b>seq1485</b> | Firmicutes    | Clostridia   | 0                  | 0                   | 0                  | 0                   |
| <b>seq1489</b> | Firmicutes    | Clostridia   | 0                  | 0                   | 0                  | 0                   |
| <b>seq1502</b> | Firmicutes    | Clostridia   | 0                  | 0                   | 0                  | 0                   |
| <b>seq1505</b> | Firmicutes    | Clostridia   | 0                  | 0                   | 0                  | 0                   |
| <b>seq1530</b> | Firmicutes    | Clostridia   | 0                  | 0                   | 0                  | 0                   |
| <b>seq1531</b> | Firmicutes    | Clostridia   | 0                  | 0                   | 0                  | 0                   |
| <b>seq1537</b> | Firmicutes    | Clostridia   | 0                  | 0                   | 0                  | 0                   |
| <b>seq1540</b> | Firmicutes    | Clostridia   | 0                  | 0                   | 0                  | 0                   |
| <b>seq1544</b> | Firmicutes    | Clostridia   | 0                  | 0                   | 0                  | 24                  |
| <b>seq1563</b> | Firmicutes    | Clostridia   | 0                  | 0                   | 0                  | 22                  |
| <b>seq1565</b> | Firmicutes    | Clostridia   | 0                  | 0                   | 0                  | 0                   |
| <b>seq1571</b> | Firmicutes    | Clostridia   | 0                  | 0                   | 0                  | 0                   |
| <b>seq1580</b> | Firmicutes    | Clostridia   | 0                  | 0                   | 0                  | 0                   |
| <b>seq1591</b> | Firmicutes    | Clostridia   | 0                  | 0                   | 0                  | 0                   |
| <b>seq1602</b> | Firmicutes    | Clostridia   | 0                  | 0                   | 19                 | 0                   |
| <b>seq1610</b> | Firmicutes    | Clostridia   | 0                  | 0                   | 0                  | 0                   |
| <b>seq1620</b> | Firmicutes    | Clostridia   | 0                  | 0                   | 0                  | 0                   |
| <b>seq1627</b> | Firmicutes    | Clostridia   | 0                  | 0                   | 0                  | 0                   |
| <b>seq1634</b> | Firmicutes    | Clostridia   | 0                  | 0                   | 0                  | 0                   |
| <b>seq1637</b> | Firmicutes    | Clostridia   | 0                  | 0                   | 0                  | 0                   |
| <b>seq1642</b> | Firmicutes    | Clostridia   | 0                  | 0                   | 0                  | 0                   |
| <b>seq1646</b> | Firmicutes    | Clostridia   | 0                  | 0                   | 0                  | 0                   |
| <b>seq1656</b> | Firmicutes    | Clostridia   | 0                  | 0                   | 0                  | 0                   |
| <b>seq1667</b> | Firmicutes    | Clostridia   | 0                  | 0                   | 0                  | 0                   |
| <b>seq1677</b> | Firmicutes    | Clostridia   | 0                  | 0                   | 0                  | 0                   |
| <b>seq1678</b> | Firmicutes    | Clostridia   | 0                  | 0                   | 0                  | 0                   |
| <b>seq1705</b> | Firmicutes    | Clostridia   | 0                  | 0                   | 0                  | 0                   |
| <b>seq1706</b> | Firmicutes    | Clostridia   | 12                 | 0                   | 0                  | 0                   |
| <b>seq1714</b> | Firmicutes    | Clostridia   | 0                  | 0                   | 0                  | 0                   |
| <b>seq1720</b> | Firmicutes    | Clostridia   | 0                  | 0                   | 0                  | 0                   |
| <b>seq1731</b> | Firmicutes    | Clostridia   | 0                  | 0                   | 0                  | 0                   |

Sequence Count Table

|                | <b>Phylum</b> | <b>Class</b> | <b>Subject6WK0</b> | <b>Subject6WK12</b> | <b>Subject18WK0</b> | <b>Subject18WK12</b> |
|----------------|---------------|--------------|--------------------|---------------------|---------------------|----------------------|
| <b>seq1473</b> | Firmicutes    | Clostridia   | 0                  | 0                   | 0                   | 0                    |
| <b>seq1485</b> | Firmicutes    | Clostridia   | 0                  | 0                   | 30                  | 0                    |
| <b>seq1489</b> | Firmicutes    | Clostridia   | 0                  | 0                   | 0                   | 0                    |
| <b>seq1502</b> | Firmicutes    | Clostridia   | 0                  | 0                   | 0                   | 0                    |
| <b>seq1505</b> | Firmicutes    | Clostridia   | 0                  | 0                   | 0                   | 0                    |
| <b>seq1530</b> | Firmicutes    | Clostridia   | 0                  | 0                   | 0                   | 0                    |
| <b>seq1531</b> | Firmicutes    | Clostridia   | 0                  | 0                   | 0                   | 0                    |
| <b>seq1537</b> | Firmicutes    | Clostridia   | 0                  | 0                   | 0                   | 0                    |
| <b>seq1540</b> | Firmicutes    | Clostridia   | 0                  | 0                   | 0                   | 0                    |
| <b>seq1544</b> | Firmicutes    | Clostridia   | 0                  | 0                   | 0                   | 0                    |
| <b>seq1563</b> | Firmicutes    | Clostridia   | 0                  | 0                   | 0                   | 0                    |
| <b>seq1565</b> | Firmicutes    | Clostridia   | 0                  | 0                   | 0                   | 0                    |
| <b>seq1571</b> | Firmicutes    | Clostridia   | 0                  | 0                   | 0                   | 0                    |
| <b>seq1580</b> | Firmicutes    | Clostridia   | 0                  | 21                  | 0                   | 0                    |
| <b>seq1591</b> | Firmicutes    | Clostridia   | 0                  | 0                   | 20                  | 0                    |
| <b>seq1602</b> | Firmicutes    | Clostridia   | 0                  | 0                   | 0                   | 0                    |
| <b>seq1610</b> | Firmicutes    | Clostridia   | 0                  | 0                   | 0                   | 0                    |
| <b>seq1620</b> | Firmicutes    | Clostridia   | 0                  | 0                   | 0                   | 0                    |
| <b>seq1627</b> | Firmicutes    | Clostridia   | 0                  | 0                   | 0                   | 0                    |
| <b>seq1634</b> | Firmicutes    | Clostridia   | 0                  | 0                   | 0                   | 0                    |
| <b>seq1637</b> | Firmicutes    | Clostridia   | 0                  | 0                   | 0                   | 0                    |
| <b>seq1642</b> | Firmicutes    | Clostridia   | 0                  | 0                   | 0                   | 0                    |
| <b>seq1646</b> | Firmicutes    | Clostridia   | 0                  | 0                   | 16                  | 0                    |
| <b>seq1656</b> | Firmicutes    | Clostridia   | 0                  | 0                   | 0                   | 0                    |
| <b>seq1667</b> | Firmicutes    | Clostridia   | 0                  | 0                   | 0                   | 0                    |
| <b>seq1677</b> | Firmicutes    | Clostridia   | 0                  | 0                   | 0                   | 0                    |
| <b>seq1678</b> | Firmicutes    | Clostridia   | 0                  | 0                   | 0                   | 0                    |
| <b>seq1705</b> | Firmicutes    | Clostridia   | 0                  | 0                   | 0                   | 0                    |
| <b>seq1706</b> | Firmicutes    | Clostridia   | 0                  | 0                   | 0                   | 0                    |
| <b>seq1714</b> | Firmicutes    | Clostridia   | 0                  | 0                   | 0                   | 0                    |
| <b>seq1720</b> | Firmicutes    | Clostridia   | 0                  | 0                   | 0                   | 0                    |
| <b>seq1731</b> | Firmicutes    | Clostridia   | 0                  | 0                   | 0                   | 0                    |



Sequence Count Table

|                | <b>Phylum</b> | <b>Class</b> | <b>Subject19WK0</b> | <b>Subject19WK12</b> | <b>Subject20WK0</b> | <b>Subject20WK12</b> |
|----------------|---------------|--------------|---------------------|----------------------|---------------------|----------------------|
| <b>seq1473</b> | Firmicutes    | Clostridia   | 0                   | 0                    | 0                   | 0                    |
| <b>seq1485</b> | Firmicutes    | Clostridia   | 0                   | 0                    | 0                   | 0                    |
| <b>seq1489</b> | Firmicutes    | Clostridia   | 0                   | 0                    | 0                   | 0                    |
| <b>seq1502</b> | Firmicutes    | Clostridia   | 0                   | 0                    | 0                   | 0                    |
| <b>seq1505</b> | Firmicutes    | Clostridia   | 0                   | 0                    | 0                   | 0                    |
| <b>seq1530</b> | Firmicutes    | Clostridia   | 0                   | 0                    | 0                   | 0                    |
| <b>seq1531</b> | Firmicutes    | Clostridia   | 0                   | 0                    | 0                   | 0                    |
| <b>seq1537</b> | Firmicutes    | Clostridia   | 0                   | 0                    | 0                   | 0                    |
| <b>seq1540</b> | Firmicutes    | Clostridia   | 0                   | 0                    | 0                   | 0                    |
| <b>seq1544</b> | Firmicutes    | Clostridia   | 0                   | 0                    | 0                   | 0                    |
| <b>seq1563</b> | Firmicutes    | Clostridia   | 0                   | 0                    | 0                   | 0                    |
| <b>seq1565</b> | Firmicutes    | Clostridia   | 7                   | 15                   | 0                   | 0                    |
| <b>seq1571</b> | Firmicutes    | Clostridia   | 0                   | 0                    | 0                   | 0                    |
| <b>seq1580</b> | Firmicutes    | Clostridia   | 0                   | 0                    | 0                   | 0                    |
| <b>seq1591</b> | Firmicutes    | Clostridia   | 0                   | 0                    | 0                   | 0                    |
| <b>seq1602</b> | Firmicutes    | Clostridia   | 0                   | 0                    | 0                   | 0                    |
| <b>seq1610</b> | Firmicutes    | Clostridia   | 0                   | 0                    | 0                   | 0                    |
| <b>seq1620</b> | Firmicutes    | Clostridia   | 0                   | 0                    | 0                   | 0                    |
| <b>seq1627</b> | Firmicutes    | Clostridia   | 0                   | 0                    | 0                   | 0                    |
| <b>seq1634</b> | Firmicutes    | Clostridia   | 0                   | 0                    | 0                   | 0                    |
| <b>seq1637</b> | Firmicutes    | Clostridia   | 0                   | 0                    | 0                   | 0                    |
| <b>seq1642</b> | Firmicutes    | Clostridia   | 0                   | 0                    | 0                   | 0                    |
| <b>seq1646</b> | Firmicutes    | Clostridia   | 0                   | 0                    | 0                   | 0                    |
| <b>seq1656</b> | Firmicutes    | Clostridia   | 0                   | 0                    | 0                   | 0                    |
| <b>seq1667</b> | Firmicutes    | Clostridia   | 0                   | 0                    | 0                   | 0                    |
| <b>seq1677</b> | Firmicutes    | Clostridia   | 0                   | 0                    | 0                   | 14                   |
| <b>seq1678</b> | Firmicutes    | Clostridia   | 0                   | 0                    | 0                   | 0                    |
| <b>seq1705</b> | Firmicutes    | Clostridia   | 0                   | 0                    | 0                   | 0                    |
| <b>seq1706</b> | Firmicutes    | Clostridia   | 0                   | 0                    | 0                   | 0                    |
| <b>seq1714</b> | Firmicutes    | Clostridia   | 0                   | 0                    | 0                   | 0                    |
| <b>seq1720</b> | Firmicutes    | Clostridia   | 0                   | 0                    | 0                   | 0                    |
| <b>seq1731</b> | Firmicutes    | Clostridia   | 0                   | 0                    | 0                   | 0                    |

Sequence Count Table

|                | <b>Phylum</b> | <b>Class</b> | <b>Subject7WK0</b> | <b>Subject7WK12</b> | <b>Subject21WK0</b> | <b>Subject21WK12</b> |
|----------------|---------------|--------------|--------------------|---------------------|---------------------|----------------------|
| <b>seq1473</b> | Firmicutes    | Clostridia   | 0                  | 0                   | 0                   | 0                    |
| <b>seq1485</b> | Firmicutes    | Clostridia   | 0                  | 0                   | 0                   | 0                    |
| <b>seq1489</b> | Firmicutes    | Clostridia   | 0                  | 0                   | 0                   | 0                    |
| <b>seq1502</b> | Firmicutes    | Clostridia   | 0                  | 0                   | 0                   | 0                    |
| <b>seq1505</b> | Firmicutes    | Clostridia   | 0                  | 0                   | 0                   | 0                    |
| <b>seq1530</b> | Firmicutes    | Clostridia   | 0                  | 0                   | 0                   | 0                    |
| <b>seq1531</b> | Firmicutes    | Clostridia   | 0                  | 0                   | 0                   | 0                    |
| <b>seq1537</b> | Firmicutes    | Clostridia   | 0                  | 0                   | 0                   | 0                    |
| <b>seq1540</b> | Firmicutes    | Clostridia   | 0                  | 0                   | 0                   | 0                    |
| <b>seq1544</b> | Firmicutes    | Clostridia   | 0                  | 0                   | 0                   | 0                    |
| <b>seq1563</b> | Firmicutes    | Clostridia   | 0                  | 0                   | 0                   | 0                    |
| <b>seq1565</b> | Firmicutes    | Clostridia   | 0                  | 0                   | 0                   | 0                    |
| <b>seq1571</b> | Firmicutes    | Clostridia   | 0                  | 0                   | 0                   | 0                    |
| <b>seq1580</b> | Firmicutes    | Clostridia   | 0                  | 0                   | 0                   | 0                    |
| <b>seq1591</b> | Firmicutes    | Clostridia   | 0                  | 0                   | 0                   | 0                    |
| <b>seq1602</b> | Firmicutes    | Clostridia   | 0                  | 0                   | 0                   | 0                    |
| <b>seq1610</b> | Firmicutes    | Clostridia   | 0                  | 0                   | 0                   | 0                    |
| <b>seq1620</b> | Firmicutes    | Clostridia   | 18                 | 0                   | 0                   | 0                    |
| <b>seq1627</b> | Firmicutes    | Clostridia   | 0                  | 0                   | 0                   | 0                    |
| <b>seq1634</b> | Firmicutes    | Clostridia   | 0                  | 0                   | 0                   | 0                    |
| <b>seq1637</b> | Firmicutes    | Clostridia   | 0                  | 0                   | 0                   | 0                    |
| <b>seq1642</b> | Firmicutes    | Clostridia   | 0                  | 0                   | 0                   | 0                    |
| <b>seq1646</b> | Firmicutes    | Clostridia   | 0                  | 0                   | 0                   | 0                    |
| <b>seq1656</b> | Firmicutes    | Clostridia   | 0                  | 0                   | 0                   | 0                    |
| <b>seq1667</b> | Firmicutes    | Clostridia   | 0                  | 0                   | 0                   | 0                    |
| <b>seq1677</b> | Firmicutes    | Clostridia   | 0                  | 0                   | 0                   | 0                    |
| <b>seq1678</b> | Firmicutes    | Clostridia   | 0                  | 0                   | 0                   | 0                    |
| <b>seq1705</b> | Firmicutes    | Clostridia   | 0                  | 0                   | 0                   | 0                    |
| <b>seq1706</b> | Firmicutes    | Clostridia   | 0                  | 0                   | 0                   | 0                    |
| <b>seq1714</b> | Firmicutes    | Clostridia   | 0                  | 0                   | 0                   | 12                   |
| <b>seq1720</b> | Firmicutes    | Clostridia   | 0                  | 0                   | 0                   | 0                    |
| <b>seq1731</b> | Firmicutes    | Clostridia   | 0                  | 0                   | 0                   | 0                    |

Sequence Count Table

|                | <b>Phylum</b> | <b>Class</b> | <b>Subject8WK0</b> | <b>Subject8WK12</b> | <b>Subject9WK0</b> | <b>Subject9WK12</b> |
|----------------|---------------|--------------|--------------------|---------------------|--------------------|---------------------|
| <b>seq1473</b> | Firmicutes    | Clostridia   | 0                  | 0                   | 0                  | 0                   |
| <b>seq1485</b> | Firmicutes    | Clostridia   | 0                  | 0                   | 0                  | 0                   |
| <b>seq1489</b> | Firmicutes    | Clostridia   | 0                  | 0                   | 0                  | 0                   |
| <b>seq1502</b> | Firmicutes    | Clostridia   | 0                  | 0                   | 0                  | 0                   |
| <b>seq1505</b> | Firmicutes    | Clostridia   | 0                  | 0                   | 0                  | 0                   |
| <b>seq1530</b> | Firmicutes    | Clostridia   | 0                  | 0                   | 0                  | 0                   |
| <b>seq1531</b> | Firmicutes    | Clostridia   | 0                  | 0                   | 0                  | 0                   |
| <b>seq1537</b> | Firmicutes    | Clostridia   | 0                  | 0                   | 0                  | 0                   |
| <b>seq1540</b> | Firmicutes    | Clostridia   | 0                  | 0                   | 0                  | 0                   |
| <b>seq1544</b> | Firmicutes    | Clostridia   | 0                  | 0                   | 0                  | 0                   |
| <b>seq1563</b> | Firmicutes    | Clostridia   | 0                  | 0                   | 0                  | 0                   |
| <b>seq1565</b> | Firmicutes    | Clostridia   | 0                  | 0                   | 0                  | 0                   |
| <b>seq1571</b> | Firmicutes    | Clostridia   | 0                  | 0                   | 0                  | 0                   |
| <b>seq1580</b> | Firmicutes    | Clostridia   | 0                  | 0                   | 0                  | 0                   |
| <b>seq1591</b> | Firmicutes    | Clostridia   | 0                  | 0                   | 0                  | 0                   |
| <b>seq1602</b> | Firmicutes    | Clostridia   | 0                  | 0                   | 0                  | 0                   |
| <b>seq1610</b> | Firmicutes    | Clostridia   | 0                  | 0                   | 0                  | 0                   |
| <b>seq1620</b> | Firmicutes    | Clostridia   | 0                  | 0                   | 0                  | 0                   |
| <b>seq1627</b> | Firmicutes    | Clostridia   | 0                  | 0                   | 0                  | 0                   |
| <b>seq1634</b> | Firmicutes    | Clostridia   | 7                  | 0                   | 0                  | 0                   |
| <b>seq1637</b> | Firmicutes    | Clostridia   | 0                  | 0                   | 0                  | 0                   |
| <b>seq1642</b> | Firmicutes    | Clostridia   | 0                  | 0                   | 0                  | 0                   |
| <b>seq1646</b> | Firmicutes    | Clostridia   | 0                  | 0                   | 0                  | 0                   |
| <b>seq1656</b> | Firmicutes    | Clostridia   | 0                  | 0                   | 0                  | 0                   |
| <b>seq1667</b> | Firmicutes    | Clostridia   | 0                  | 0                   | 0                  | 0                   |
| <b>seq1677</b> | Firmicutes    | Clostridia   | 0                  | 0                   | 0                  | 0                   |
| <b>seq1678</b> | Firmicutes    | Clostridia   | 0                  | 0                   | 0                  | 0                   |
| <b>seq1705</b> | Firmicutes    | Clostridia   | 0                  | 0                   | 0                  | 0                   |
| <b>seq1706</b> | Firmicutes    | Clostridia   | 0                  | 0                   | 0                  | 0                   |
| <b>seq1714</b> | Firmicutes    | Clostridia   | 0                  | 0                   | 0                  | 0                   |
| <b>seq1720</b> | Firmicutes    | Clostridia   | 0                  | 0                   | 0                  | 0                   |
| <b>seq1731</b> | Firmicutes    | Clostridia   | 0                  | 0                   | 0                  | 0                   |

Sequence Count Table

|                | <b>Phylum</b> | <b>Class</b> | <b>Subject10WK0</b> | <b>Subject10WK12</b> | <b>Subject22WK0</b> | <b>Subject22WK12</b> |
|----------------|---------------|--------------|---------------------|----------------------|---------------------|----------------------|
| <b>seq1473</b> | Firmicutes    | Clostridia   | 0                   | 0                    | 0                   | 0                    |
| <b>seq1485</b> | Firmicutes    | Clostridia   | 0                   | 0                    | 0                   | 0                    |
| <b>seq1489</b> | Firmicutes    | Clostridia   | 0                   | 0                    | 0                   | 0                    |
| <b>seq1502</b> | Firmicutes    | Clostridia   | 13                  | 15                   | 0                   | 0                    |
| <b>seq1505</b> | Firmicutes    | Clostridia   | 0                   | 0                    | 10                  | 10                   |
| <b>seq1530</b> | Firmicutes    | Clostridia   | 0                   | 0                    | 0                   | 0                    |
| <b>seq1531</b> | Firmicutes    | Clostridia   | 0                   | 0                    | 0                   | 0                    |
| <b>seq1537</b> | Firmicutes    | Clostridia   | 0                   | 25                   | 0                   | 0                    |
| <b>seq1540</b> | Firmicutes    | Clostridia   | 0                   | 0                    | 9                   | 16                   |
| <b>seq1544</b> | Firmicutes    | Clostridia   | 0                   | 0                    | 0                   | 0                    |
| <b>seq1563</b> | Firmicutes    | Clostridia   | 0                   | 0                    | 0                   | 0                    |
| <b>seq1565</b> | Firmicutes    | Clostridia   | 0                   | 0                    | 0                   | 0                    |
| <b>seq1571</b> | Firmicutes    | Clostridia   | 0                   | 0                    | 0                   | 0                    |
| <b>seq1580</b> | Firmicutes    | Clostridia   | 0                   | 0                    | 0                   | 0                    |
| <b>seq1591</b> | Firmicutes    | Clostridia   | 0                   | 0                    | 0                   | 0                    |
| <b>seq1602</b> | Firmicutes    | Clostridia   | 0                   | 0                    | 0                   | 0                    |
| <b>seq1610</b> | Firmicutes    | Clostridia   | 0                   | 0                    | 0                   | 0                    |
| <b>seq1620</b> | Firmicutes    | Clostridia   | 0                   | 0                    | 0                   | 0                    |
| <b>seq1627</b> | Firmicutes    | Clostridia   | 0                   | 0                    | 0                   | 0                    |
| <b>seq1634</b> | Firmicutes    | Clostridia   | 6                   | 0                    | 0                   | 0                    |
| <b>seq1637</b> | Firmicutes    | Clostridia   | 0                   | 0                    | 0                   | 0                    |
| <b>seq1642</b> | Firmicutes    | Clostridia   | 0                   | 0                    | 0                   | 0                    |
| <b>seq1646</b> | Firmicutes    | Clostridia   | 0                   | 0                    | 0                   | 0                    |
| <b>seq1656</b> | Firmicutes    | Clostridia   | 0                   | 0                    | 0                   | 0                    |
| <b>seq1667</b> | Firmicutes    | Clostridia   | 0                   | 0                    | 0                   | 0                    |
| <b>seq1677</b> | Firmicutes    | Clostridia   | 0                   | 0                    | 0                   | 0                    |
| <b>seq1678</b> | Firmicutes    | Clostridia   | 0                   | 0                    | 7                   | 7                    |
| <b>seq1705</b> | Firmicutes    | Clostridia   | 0                   | 0                    | 0                   | 0                    |
| <b>seq1706</b> | Firmicutes    | Clostridia   | 0                   | 0                    | 0                   | 0                    |
| <b>seq1714</b> | Firmicutes    | Clostridia   | 0                   | 0                    | 0                   | 0                    |
| <b>seq1720</b> | Firmicutes    | Clostridia   | 0                   | 0                    | 0                   | 0                    |
| <b>seq1731</b> | Firmicutes    | Clostridia   | 0                   | 0                    | 0                   | 0                    |

Sequence Count Table

|                | <b>Phylum</b> | <b>Class</b> | <b>Subject23WK0</b> | <b>Subject23WK12</b> | <b>Subject24WK0</b> | <b>Subject24WK12</b> |
|----------------|---------------|--------------|---------------------|----------------------|---------------------|----------------------|
| <b>seq1473</b> | Firmicutes    | Clostridia   | 0                   | 0                    | 0                   | 0                    |
| <b>seq1485</b> | Firmicutes    | Clostridia   | 0                   | 0                    | 0                   | 0                    |
| <b>seq1489</b> | Firmicutes    | Clostridia   | 0                   | 0                    | 0                   | 0                    |
| <b>seq1502</b> | Firmicutes    | Clostridia   | 0                   | 0                    | 0                   | 0                    |
| <b>seq1505</b> | Firmicutes    | Clostridia   | 0                   | 0                    | 0                   | 0                    |
| <b>seq1530</b> | Firmicutes    | Clostridia   | 0                   | 0                    | 0                   | 0                    |
| <b>seq1531</b> | Firmicutes    | Clostridia   | 0                   | 0                    | 0                   | 0                    |
| <b>seq1537</b> | Firmicutes    | Clostridia   | 0                   | 0                    | 0                   | 0                    |
| <b>seq1540</b> | Firmicutes    | Clostridia   | 0                   | 0                    | 0                   | 0                    |
| <b>seq1544</b> | Firmicutes    | Clostridia   | 0                   | 0                    | 0                   | 0                    |
| <b>seq1563</b> | Firmicutes    | Clostridia   | 0                   | 0                    | 0                   | 0                    |
| <b>seq1565</b> | Firmicutes    | Clostridia   | 0                   | 0                    | 0                   | 0                    |
| <b>seq1571</b> | Firmicutes    | Clostridia   | 0                   | 0                    | 0                   | 22                   |
| <b>seq1580</b> | Firmicutes    | Clostridia   | 0                   | 0                    | 0                   | 0                    |
| <b>seq1591</b> | Firmicutes    | Clostridia   | 0                   | 0                    | 0                   | 0                    |
| <b>seq1602</b> | Firmicutes    | Clostridia   | 0                   | 0                    | 0                   | 0                    |
| <b>seq1610</b> | Firmicutes    | Clostridia   | 0                   | 0                    | 0                   | 0                    |
| <b>seq1620</b> | Firmicutes    | Clostridia   | 0                   | 0                    | 0                   | 0                    |
| <b>seq1627</b> | Firmicutes    | Clostridia   | 0                   | 0                    | 0                   | 0                    |
| <b>seq1634</b> | Firmicutes    | Clostridia   | 0                   | 0                    | 0                   | 0                    |
| <b>seq1637</b> | Firmicutes    | Clostridia   | 0                   | 17                   | 0                   | 0                    |
| <b>seq1642</b> | Firmicutes    | Clostridia   | 0                   | 0                    | 0                   | 0                    |
| <b>seq1646</b> | Firmicutes    | Clostridia   | 0                   | 0                    | 0                   | 0                    |
| <b>seq1656</b> | Firmicutes    | Clostridia   | 0                   | 0                    | 0                   | 0                    |
| <b>seq1667</b> | Firmicutes    | Clostridia   | 0                   | 0                    | 0                   | 0                    |
| <b>seq1677</b> | Firmicutes    | Clostridia   | 0                   | 0                    | 0                   | 0                    |
| <b>seq1678</b> | Firmicutes    | Clostridia   | 0                   | 0                    | 0                   | 0                    |
| <b>seq1705</b> | Firmicutes    | Clostridia   | 0                   | 0                    | 0                   | 0                    |
| <b>seq1706</b> | Firmicutes    | Clostridia   | 0                   | 0                    | 0                   | 0                    |
| <b>seq1714</b> | Firmicutes    | Clostridia   | 0                   | 0                    | 0                   | 0                    |
| <b>seq1720</b> | Firmicutes    | Clostridia   | 0                   | 0                    | 0                   | 0                    |
| <b>seq1731</b> | Firmicutes    | Clostridia   | 0                   | 0                    | 0                   | 0                    |

Sequence Count Table

|                | <b>Phylum</b> | <b>Class</b> | <b>Subject11WK0</b> | <b>Subject11WK12</b> | <b>Subject12WK0</b> | <b>Subject12WK12</b> |
|----------------|---------------|--------------|---------------------|----------------------|---------------------|----------------------|
| <b>seq1473</b> | Firmicutes    | Clostridia   | 0                   | 0                    | 0                   | 0                    |
| <b>seq1485</b> | Firmicutes    | Clostridia   | 0                   | 0                    | 0                   | 0                    |
| <b>seq1489</b> | Firmicutes    | Clostridia   | 0                   | 0                    | 0                   | 0                    |
| <b>seq1502</b> | Firmicutes    | Clostridia   | 0                   | 0                    | 0                   | 0                    |
| <b>seq1505</b> | Firmicutes    | Clostridia   | 0                   | 0                    | 0                   | 0                    |
| <b>seq1530</b> | Firmicutes    | Clostridia   | 26                  | 0                    | 0                   | 0                    |
| <b>seq1531</b> | Firmicutes    | Clostridia   | 0                   | 0                    | 0                   | 0                    |
| <b>seq1537</b> | Firmicutes    | Clostridia   | 0                   | 0                    | 0                   | 0                    |
| <b>seq1540</b> | Firmicutes    | Clostridia   | 0                   | 0                    | 0                   | 0                    |
| <b>seq1544</b> | Firmicutes    | Clostridia   | 0                   | 0                    | 0                   | 0                    |
| <b>seq1563</b> | Firmicutes    | Clostridia   | 0                   | 0                    | 0                   | 0                    |
| <b>seq1565</b> | Firmicutes    | Clostridia   | 0                   | 0                    | 0                   | 0                    |
| <b>seq1571</b> | Firmicutes    | Clostridia   | 0                   | 0                    | 0                   | 0                    |
| <b>seq1580</b> | Firmicutes    | Clostridia   | 0                   | 0                    | 0                   | 0                    |
| <b>seq1591</b> | Firmicutes    | Clostridia   | 0                   | 0                    | 0                   | 0                    |
| <b>seq1602</b> | Firmicutes    | Clostridia   | 0                   | 0                    | 0                   | 0                    |
| <b>seq1610</b> | Firmicutes    | Clostridia   | 0                   | 0                    | 0                   | 0                    |
| <b>seq1620</b> | Firmicutes    | Clostridia   | 0                   | 0                    | 0                   | 0                    |
| <b>seq1627</b> | Firmicutes    | Clostridia   | 0                   | 0                    | 0                   | 0                    |
| <b>seq1634</b> | Firmicutes    | Clostridia   | 0                   | 0                    | 0                   | 0                    |
| <b>seq1637</b> | Firmicutes    | Clostridia   | 0                   | 0                    | 0                   | 0                    |
| <b>seq1642</b> | Firmicutes    | Clostridia   | 0                   | 0                    | 0                   | 0                    |
| <b>seq1646</b> | Firmicutes    | Clostridia   | 0                   | 0                    | 0                   | 0                    |
| <b>seq1656</b> | Firmicutes    | Clostridia   | 0                   | 0                    | 0                   | 0                    |
| <b>seq1667</b> | Firmicutes    | Clostridia   | 15                  | 0                    | 0                   | 0                    |
| <b>seq1677</b> | Firmicutes    | Clostridia   | 0                   | 0                    | 0                   | 0                    |
| <b>seq1678</b> | Firmicutes    | Clostridia   | 0                   | 0                    | 0                   | 0                    |
| <b>seq1705</b> | Firmicutes    | Clostridia   | 0                   | 0                    | 0                   | 0                    |
| <b>seq1706</b> | Firmicutes    | Clostridia   | 0                   | 0                    | 0                   | 0                    |
| <b>seq1714</b> | Firmicutes    | Clostridia   | 0                   | 0                    | 0                   | 0                    |
| <b>seq1720</b> | Firmicutes    | Clostridia   | 0                   | 0                    | 0                   | 0                    |
| <b>seq1731</b> | Firmicutes    | Clostridia   | 11                  | 0                    | 0                   | 0                    |

Sequence Count Table

|                | <b>Phylum</b> | <b>Class</b> | <b>Subject25WK0</b> | <b>Subject25WK12</b> | <b>Subject38WK0</b> | <b>Subject38WK12</b> |
|----------------|---------------|--------------|---------------------|----------------------|---------------------|----------------------|
| <b>seq1473</b> | Firmicutes    | Clostridia   | 0                   | 0                    | 0                   | 0                    |
| <b>seq1485</b> | Firmicutes    | Clostridia   | 0                   | 0                    | 0                   | 0                    |
| <b>seq1489</b> | Firmicutes    | Clostridia   | 0                   | 0                    | 0                   | 0                    |
| <b>seq1502</b> | Firmicutes    | Clostridia   | 0                   | 0                    | 0                   | 0                    |
| <b>seq1505</b> | Firmicutes    | Clostridia   | 0                   | 0                    | 0                   | 0                    |
| <b>seq1530</b> | Firmicutes    | Clostridia   | 0                   | 0                    | 0                   | 0                    |
| <b>seq1531</b> | Firmicutes    | Clostridia   | 0                   | 0                    | 0                   | 0                    |
| <b>seq1537</b> | Firmicutes    | Clostridia   | 0                   | 0                    | 0                   | 0                    |
| <b>seq1540</b> | Firmicutes    | Clostridia   | 0                   | 0                    | 0                   | 0                    |
| <b>seq1544</b> | Firmicutes    | Clostridia   | 0                   | 0                    | 0                   | 0                    |
| <b>seq1563</b> | Firmicutes    | Clostridia   | 0                   | 0                    | 0                   | 0                    |
| <b>seq1565</b> | Firmicutes    | Clostridia   | 0                   | 0                    | 0                   | 0                    |
| <b>seq1571</b> | Firmicutes    | Clostridia   | 0                   | 0                    | 0                   | 0                    |
| <b>seq1580</b> | Firmicutes    | Clostridia   | 0                   | 0                    | 0                   | 0                    |
| <b>seq1591</b> | Firmicutes    | Clostridia   | 0                   | 0                    | 0                   | 0                    |
| <b>seq1602</b> | Firmicutes    | Clostridia   | 0                   | 0                    | 0                   | 0                    |
| <b>seq1610</b> | Firmicutes    | Clostridia   | 0                   | 0                    | 0                   | 0                    |
| <b>seq1620</b> | Firmicutes    | Clostridia   | 0                   | 0                    | 0                   | 0                    |
| <b>seq1627</b> | Firmicutes    | Clostridia   | 0                   | 0                    | 0                   | 0                    |
| <b>seq1634</b> | Firmicutes    | Clostridia   | 0                   | 0                    | 0                   | 0                    |
| <b>seq1637</b> | Firmicutes    | Clostridia   | 0                   | 0                    | 0                   | 0                    |
| <b>seq1642</b> | Firmicutes    | Clostridia   | 0                   | 0                    | 0                   | 0                    |
| <b>seq1646</b> | Firmicutes    | Clostridia   | 0                   | 0                    | 0                   | 0                    |
| <b>seq1656</b> | Firmicutes    | Clostridia   | 0                   | 0                    | 0                   | 0                    |
| <b>seq1667</b> | Firmicutes    | Clostridia   | 0                   | 0                    | 0                   | 0                    |
| <b>seq1677</b> | Firmicutes    | Clostridia   | 0                   | 0                    | 0                   | 0                    |
| <b>seq1678</b> | Firmicutes    | Clostridia   | 0                   | 0                    | 0                   | 0                    |
| <b>seq1705</b> | Firmicutes    | Clostridia   | 0                   | 0                    | 0                   | 0                    |
| <b>seq1706</b> | Firmicutes    | Clostridia   | 0                   | 0                    | 0                   | 0                    |
| <b>seq1714</b> | Firmicutes    | Clostridia   | 0                   | 0                    | 0                   | 0                    |
| <b>seq1720</b> | Firmicutes    | Clostridia   | 0                   | 0                    | 0                   | 0                    |
| <b>seq1731</b> | Firmicutes    | Clostridia   | 0                   | 0                    | 0                   | 0                    |

Sequence Count Table

|                | <b>Phylum</b> | <b>Class</b> | <b>Subject31WK0</b> | <b>Subject31WK12</b> | <b>Subject32WK0</b> | <b>Subject32WK12</b> |
|----------------|---------------|--------------|---------------------|----------------------|---------------------|----------------------|
| <b>seq1473</b> | Firmicutes    | Clostridia   | 0                   | 0                    | 0                   | 0                    |
| <b>seq1485</b> | Firmicutes    | Clostridia   | 0                   | 0                    | 0                   | 0                    |
| <b>seq1489</b> | Firmicutes    | Clostridia   | 0                   | 0                    | 0                   | 0                    |
| <b>seq1502</b> | Firmicutes    | Clostridia   | 0                   | 0                    | 0                   | 0                    |
| <b>seq1505</b> | Firmicutes    | Clostridia   | 0                   | 0                    | 0                   | 0                    |
| <b>seq1530</b> | Firmicutes    | Clostridia   | 0                   | 0                    | 0                   | 0                    |
| <b>seq1531</b> | Firmicutes    | Clostridia   | 0                   | 0                    | 0                   | 0                    |
| <b>seq1537</b> | Firmicutes    | Clostridia   | 0                   | 0                    | 0                   | 0                    |
| <b>seq1540</b> | Firmicutes    | Clostridia   | 0                   | 0                    | 0                   | 0                    |
| <b>seq1544</b> | Firmicutes    | Clostridia   | 0                   | 0                    | 0                   | 0                    |
| <b>seq1563</b> | Firmicutes    | Clostridia   | 0                   | 0                    | 0                   | 0                    |
| <b>seq1565</b> | Firmicutes    | Clostridia   | 0                   | 0                    | 0                   | 0                    |
| <b>seq1571</b> | Firmicutes    | Clostridia   | 0                   | 0                    | 0                   | 0                    |
| <b>seq1580</b> | Firmicutes    | Clostridia   | 0                   | 0                    | 0                   | 0                    |
| <b>seq1591</b> | Firmicutes    | Clostridia   | 0                   | 0                    | 0                   | 0                    |
| <b>seq1602</b> | Firmicutes    | Clostridia   | 0                   | 0                    | 0                   | 0                    |
| <b>seq1610</b> | Firmicutes    | Clostridia   | 0                   | 0                    | 0                   | 0                    |
| <b>seq1620</b> | Firmicutes    | Clostridia   | 0                   | 0                    | 0                   | 0                    |
| <b>seq1627</b> | Firmicutes    | Clostridia   | 0                   | 0                    | 0                   | 0                    |
| <b>seq1634</b> | Firmicutes    | Clostridia   | 0                   | 0                    | 0                   | 0                    |
| <b>seq1637</b> | Firmicutes    | Clostridia   | 0                   | 0                    | 0                   | 0                    |
| <b>seq1642</b> | Firmicutes    | Clostridia   | 0                   | 0                    | 0                   | 0                    |
| <b>seq1646</b> | Firmicutes    | Clostridia   | 0                   | 0                    | 0                   | 0                    |
| <b>seq1656</b> | Firmicutes    | Clostridia   | 0                   | 0                    | 0                   | 0                    |
| <b>seq1667</b> | Firmicutes    | Clostridia   | 0                   | 0                    | 0                   | 0                    |
| <b>seq1677</b> | Firmicutes    | Clostridia   | 0                   | 0                    | 0                   | 0                    |
| <b>seq1678</b> | Firmicutes    | Clostridia   | 0                   | 0                    | 0                   | 0                    |
| <b>seq1705</b> | Firmicutes    | Clostridia   | 0                   | 0                    | 0                   | 0                    |
| <b>seq1706</b> | Firmicutes    | Clostridia   | 0                   | 0                    | 0                   | 0                    |
| <b>seq1714</b> | Firmicutes    | Clostridia   | 0                   | 0                    | 0                   | 0                    |
| <b>seq1720</b> | Firmicutes    | Clostridia   | 0                   | 0                    | 0                   | 0                    |
| <b>seq1731</b> | Firmicutes    | Clostridia   | 0                   | 0                    | 0                   | 0                    |



Sequence Count Table

|                | <b>Phylum</b> | <b>Class</b> | <b>Subject13WK0</b> | <b>Subject13WK12</b> | <b>Subject39WK0</b> | <b>Subject39WK12</b> |
|----------------|---------------|--------------|---------------------|----------------------|---------------------|----------------------|
| <b>seq1473</b> | Firmicutes    | Clostridia   | 0                   | 0                    | 0                   | 0                    |
| <b>seq1485</b> | Firmicutes    | Clostridia   | 0                   | 0                    | 0                   | 0                    |
| <b>seq1489</b> | Firmicutes    | Clostridia   | 0                   | 0                    | 0                   | 0                    |
| <b>seq1502</b> | Firmicutes    | Clostridia   | 0                   | 0                    | 0                   | 0                    |
| <b>seq1505</b> | Firmicutes    | Clostridia   | 0                   | 0                    | 0                   | 0                    |
| <b>seq1530</b> | Firmicutes    | Clostridia   | 0                   | 0                    | 0                   | 0                    |
| <b>seq1531</b> | Firmicutes    | Clostridia   | 0                   | 0                    | 0                   | 0                    |
| <b>seq1537</b> | Firmicutes    | Clostridia   | 0                   | 0                    | 0                   | 0                    |
| <b>seq1540</b> | Firmicutes    | Clostridia   | 0                   | 0                    | 0                   | 0                    |
| <b>seq1544</b> | Firmicutes    | Clostridia   | 0                   | 0                    | 0                   | 0                    |
| <b>seq1563</b> | Firmicutes    | Clostridia   | 0                   | 0                    | 0                   | 0                    |
| <b>seq1565</b> | Firmicutes    | Clostridia   | 0                   | 0                    | 0                   | 0                    |
| <b>seq1571</b> | Firmicutes    | Clostridia   | 0                   | 0                    | 0                   | 0                    |
| <b>seq1580</b> | Firmicutes    | Clostridia   | 0                   | 0                    | 0                   | 0                    |
| <b>seq1591</b> | Firmicutes    | Clostridia   | 0                   | 0                    | 0                   | 0                    |
| <b>seq1602</b> | Firmicutes    | Clostridia   | 0                   | 0                    | 0                   | 0                    |
| <b>seq1610</b> | Firmicutes    | Clostridia   | 0                   | 19                   | 0                   | 0                    |
| <b>seq1620</b> | Firmicutes    | Clostridia   | 0                   | 0                    | 0                   | 0                    |
| <b>seq1627</b> | Firmicutes    | Clostridia   | 0                   | 0                    | 0                   | 0                    |
| <b>seq1634</b> | Firmicutes    | Clostridia   | 0                   | 0                    | 0                   | 0                    |
| <b>seq1637</b> | Firmicutes    | Clostridia   | 0                   | 0                    | 0                   | 0                    |
| <b>seq1642</b> | Firmicutes    | Clostridia   | 0                   | 0                    | 0                   | 0                    |
| <b>seq1646</b> | Firmicutes    | Clostridia   | 0                   | 0                    | 0                   | 0                    |
| <b>seq1656</b> | Firmicutes    | Clostridia   | 0                   | 0                    | 0                   | 0                    |
| <b>seq1667</b> | Firmicutes    | Clostridia   | 0                   | 0                    | 0                   | 0                    |
| <b>seq1677</b> | Firmicutes    | Clostridia   | 0                   | 0                    | 0                   | 0                    |
| <b>seq1678</b> | Firmicutes    | Clostridia   | 0                   | 0                    | 0                   | 0                    |
| <b>seq1705</b> | Firmicutes    | Clostridia   | 0                   | 0                    | 0                   | 0                    |
| <b>seq1706</b> | Firmicutes    | Clostridia   | 0                   | 0                    | 0                   | 0                    |
| <b>seq1714</b> | Firmicutes    | Clostridia   | 0                   | 0                    | 0                   | 0                    |
| <b>seq1720</b> | Firmicutes    | Clostridia   | 0                   | 0                    | 0                   | 0                    |
| <b>seq1731</b> | Firmicutes    | Clostridia   | 0                   | 0                    | 0                   | 0                    |

Sequence Count Table

|                | <b>Phylum</b> | <b>Class</b> | <b>Subject26WK0</b> | <b>Subject26WK12</b> | <b>Subject14WK0</b> | <b>Subject14WK12</b> |
|----------------|---------------|--------------|---------------------|----------------------|---------------------|----------------------|
| <b>seq1473</b> | Firmicutes    | Clostridia   | 0                   | 0                    | 0                   | 0                    |
| <b>seq1485</b> | Firmicutes    | Clostridia   | 0                   | 0                    | 0                   | 0                    |
| <b>seq1489</b> | Firmicutes    | Clostridia   | 16                  | 14                   | 0                   | 0                    |
| <b>seq1502</b> | Firmicutes    | Clostridia   | 0                   | 0                    | 0                   | 0                    |
| <b>seq1505</b> | Firmicutes    | Clostridia   | 8                   | 0                    | 0                   | 0                    |
| <b>seq1530</b> | Firmicutes    | Clostridia   | 0                   | 0                    | 0                   | 0                    |
| <b>seq1531</b> | Firmicutes    | Clostridia   | 0                   | 0                    | 0                   | 0                    |
| <b>seq1537</b> | Firmicutes    | Clostridia   | 0                   | 0                    | 0                   | 0                    |
| <b>seq1540</b> | Firmicutes    | Clostridia   | 0                   | 0                    | 0                   | 0                    |
| <b>seq1544</b> | Firmicutes    | Clostridia   | 0                   | 0                    | 0                   | 0                    |
| <b>seq1563</b> | Firmicutes    | Clostridia   | 0                   | 0                    | 0                   | 0                    |
| <b>seq1565</b> | Firmicutes    | Clostridia   | 0                   | 0                    | 0                   | 0                    |
| <b>seq1571</b> | Firmicutes    | Clostridia   | 0                   | 0                    | 0                   | 0                    |
| <b>seq1580</b> | Firmicutes    | Clostridia   | 0                   | 0                    | 0                   | 0                    |
| <b>seq1591</b> | Firmicutes    | Clostridia   | 0                   | 0                    | 0                   | 0                    |
| <b>seq1602</b> | Firmicutes    | Clostridia   | 0                   | 0                    | 0                   | 0                    |
| <b>seq1610</b> | Firmicutes    | Clostridia   | 0                   | 0                    | 0                   | 0                    |
| <b>seq1620</b> | Firmicutes    | Clostridia   | 0                   | 0                    | 0                   | 0                    |
| <b>seq1627</b> | Firmicutes    | Clostridia   | 0                   | 0                    | 0                   | 0                    |
| <b>seq1634</b> | Firmicutes    | Clostridia   | 0                   | 0                    | 0                   | 0                    |
| <b>seq1637</b> | Firmicutes    | Clostridia   | 0                   | 0                    | 0                   | 0                    |
| <b>seq1642</b> | Firmicutes    | Clostridia   | 0                   | 0                    | 0                   | 0                    |
| <b>seq1646</b> | Firmicutes    | Clostridia   | 0                   | 0                    | 0                   | 0                    |
| <b>seq1656</b> | Firmicutes    | Clostridia   | 0                   | 0                    | 0                   | 0                    |
| <b>seq1667</b> | Firmicutes    | Clostridia   | 0                   | 0                    | 0                   | 0                    |
| <b>seq1677</b> | Firmicutes    | Clostridia   | 0                   | 0                    | 0                   | 0                    |
| <b>seq1678</b> | Firmicutes    | Clostridia   | 0                   | 0                    | 0                   | 0                    |
| <b>seq1705</b> | Firmicutes    | Clostridia   | 0                   | 0                    | 0                   | 0                    |
| <b>seq1706</b> | Firmicutes    | Clostridia   | 0                   | 0                    | 0                   | 0                    |
| <b>seq1714</b> | Firmicutes    | Clostridia   | 0                   | 0                    | 0                   | 0                    |
| <b>seq1720</b> | Firmicutes    | Clostridia   | 0                   | 0                    | 0                   | 0                    |
| <b>seq1731</b> | Firmicutes    | Clostridia   | 0                   | 0                    | 0                   | 0                    |

Sequence Count Table

|                | <b>Phylum</b> | <b>Class</b> | <b>Subject27WK0</b> | <b>Subject27WK12</b> | <b>Subject15WK0</b> | <b>Subject15WK12</b> |
|----------------|---------------|--------------|---------------------|----------------------|---------------------|----------------------|
| <b>seq1473</b> | Firmicutes    | Clostridia   | 0                   | 0                    | 0                   | 0                    |
| <b>seq1485</b> | Firmicutes    | Clostridia   | 0                   | 0                    | 0                   | 0                    |
| <b>seq1489</b> | Firmicutes    | Clostridia   | 0                   | 0                    | 0                   | 0                    |
| <b>seq1502</b> | Firmicutes    | Clostridia   | 0                   | 0                    | 0                   | 0                    |
| <b>seq1505</b> | Firmicutes    | Clostridia   | 0                   | 0                    | 0                   | 0                    |
| <b>seq1530</b> | Firmicutes    | Clostridia   | 0                   | 0                    | 0                   | 0                    |
| <b>seq1531</b> | Firmicutes    | Clostridia   | 26                  | 0                    | 0                   | 0                    |
| <b>seq1537</b> | Firmicutes    | Clostridia   | 0                   | 0                    | 0                   | 0                    |
| <b>seq1540</b> | Firmicutes    | Clostridia   | 0                   | 0                    | 0                   | 0                    |
| <b>seq1544</b> | Firmicutes    | Clostridia   | 0                   | 0                    | 0                   | 0                    |
| <b>seq1563</b> | Firmicutes    | Clostridia   | 0                   | 0                    | 0                   | 0                    |
| <b>seq1565</b> | Firmicutes    | Clostridia   | 0                   | 0                    | 0                   | 0                    |
| <b>seq1571</b> | Firmicutes    | Clostridia   | 0                   | 0                    | 0                   | 0                    |
| <b>seq1580</b> | Firmicutes    | Clostridia   | 0                   | 0                    | 0                   | 0                    |
| <b>seq1591</b> | Firmicutes    | Clostridia   | 0                   | 0                    | 0                   | 0                    |
| <b>seq1602</b> | Firmicutes    | Clostridia   | 0                   | 0                    | 0                   | 0                    |
| <b>seq1610</b> | Firmicutes    | Clostridia   | 0                   | 0                    | 0                   | 0                    |
| <b>seq1620</b> | Firmicutes    | Clostridia   | 0                   | 0                    | 0                   | 0                    |
| <b>seq1627</b> | Firmicutes    | Clostridia   | 0                   | 0                    | 0                   | 18                   |
| <b>seq1634</b> | Firmicutes    | Clostridia   | 0                   | 0                    | 4                   | 0                    |
| <b>seq1637</b> | Firmicutes    | Clostridia   | 0                   | 0                    | 0                   | 0                    |
| <b>seq1642</b> | Firmicutes    | Clostridia   | 0                   | 0                    | 0                   | 0                    |
| <b>seq1646</b> | Firmicutes    | Clostridia   | 0                   | 0                    | 0                   | 0                    |
| <b>seq1656</b> | Firmicutes    | Clostridia   | 0                   | 0                    | 0                   | 0                    |
| <b>seq1667</b> | Firmicutes    | Clostridia   | 0                   | 0                    | 0                   | 0                    |
| <b>seq1677</b> | Firmicutes    | Clostridia   | 0                   | 0                    | 0                   | 0                    |
| <b>seq1678</b> | Firmicutes    | Clostridia   | 0                   | 0                    | 0                   | 0                    |
| <b>seq1705</b> | Firmicutes    | Clostridia   | 0                   | 0                    | 0                   | 0                    |
| <b>seq1706</b> | Firmicutes    | Clostridia   | 0                   | 0                    | 0                   | 0                    |
| <b>seq1714</b> | Firmicutes    | Clostridia   | 0                   | 0                    | 0                   | 0                    |
| <b>seq1720</b> | Firmicutes    | Clostridia   | 0                   | 0                    | 0                   | 12                   |
| <b>seq1731</b> | Firmicutes    | Clostridia   | 0                   | 0                    | 0                   | 0                    |

Sequence Count Table

|                | <b>Phylum</b> | <b>Class</b> | <b>Δ</b> |  |  |  |
|----------------|---------------|--------------|----------|--|--|--|
| <b>seq1473</b> | Firmicutes    | Clostridia   |          |  |  |  |
| <b>seq1485</b> | Firmicutes    | Clostridia   |          |  |  |  |
| <b>seq1489</b> | Firmicutes    | Clostridia   |          |  |  |  |
| <b>seq1502</b> | Firmicutes    | Clostridia   |          |  |  |  |
| <b>seq1505</b> | Firmicutes    | Clostridia   |          |  |  |  |
| <b>seq1530</b> | Firmicutes    | Clostridia   |          |  |  |  |
| <b>seq1531</b> | Firmicutes    | Clostridia   |          |  |  |  |
| <b>seq1537</b> | Firmicutes    | Clostridia   |          |  |  |  |
| <b>seq1540</b> | Firmicutes    | Clostridia   |          |  |  |  |
| <b>seq1544</b> | Firmicutes    | Clostridia   |          |  |  |  |
| <b>seq1563</b> | Firmicutes    | Clostridia   |          |  |  |  |
| <b>seq1565</b> | Firmicutes    | Clostridia   |          |  |  |  |
| <b>seq1571</b> | Firmicutes    | Clostridia   |          |  |  |  |
| <b>seq1580</b> | Firmicutes    | Clostridia   |          |  |  |  |
| <b>seq1591</b> | Firmicutes    | Clostridia   |          |  |  |  |
| <b>seq1602</b> | Firmicutes    | Clostridia   |          |  |  |  |
| <b>seq1610</b> | Firmicutes    | Clostridia   |          |  |  |  |
| <b>seq1620</b> | Firmicutes    | Clostridia   |          |  |  |  |
| <b>seq1627</b> | Firmicutes    | Clostridia   |          |  |  |  |
| <b>seq1634</b> | Firmicutes    | Clostridia   |          |  |  |  |
| <b>seq1637</b> | Firmicutes    | Clostridia   |          |  |  |  |
| <b>seq1642</b> | Firmicutes    | Clostridia   |          |  |  |  |
| <b>seq1646</b> | Firmicutes    | Clostridia   |          |  |  |  |
| <b>seq1656</b> | Firmicutes    | Clostridia   |          |  |  |  |
| <b>seq1667</b> | Firmicutes    | Clostridia   |          |  |  |  |
| <b>seq1677</b> | Firmicutes    | Clostridia   |          |  |  |  |
| <b>seq1678</b> | Firmicutes    | Clostridia   |          |  |  |  |
| <b>seq1705</b> | Firmicutes    | Clostridia   |          |  |  |  |
| <b>seq1706</b> | Firmicutes    | Clostridia   |          |  |  |  |
| <b>seq1714</b> | Firmicutes    | Clostridia   |          |  |  |  |
| <b>seq1720</b> | Firmicutes    | Clostridia   |          |  |  |  |
| <b>seq1731</b> | Firmicutes    | Clostridia   |          |  |  |  |

Sequence Count Table

|                | <b>Phylum</b> | <b>Class</b> | <b>Order</b>    | <b>Family</b>    |
|----------------|---------------|--------------|-----------------|------------------|
| <b>seq1748</b> | Firmicutes    | Clostridia   | Clostridiales   | Lachnospiraceae  |
| <b>seq1772</b> | Firmicutes    | Clostridia   | Clostridiales   | Lachnospiraceae  |
| <b>seq1786</b> | Firmicutes    | Clostridia   | Clostridiales   | Lachnospiraceae  |
| <b>seq1790</b> | Firmicutes    | Clostridia   | Clostridiales   | Lachnospiraceae  |
| <b>seq1792</b> | Firmicutes    | Clostridia   | Clostridiales   | Lachnospiraceae  |
| <b>seq1802</b> | Firmicutes    | Clostridia   | Clostridiales   | Lachnospiraceae  |
| <b>seq1803</b> | Firmicutes    | Clostridia   | Clostridiales   | Lachnospiraceae  |
| <b>seq1847</b> | Firmicutes    | Clostridia   | Clostridiales   | Lachnospiraceae  |
| <b>seq1900</b> | Firmicutes    | Clostridia   | Clostridiales   | Lachnospiraceae  |
| <b>seq1901</b> | Firmicutes    | Clostridia   | Clostridiales   | Lachnospiraceae  |
| <b>seq1903</b> | Firmicutes    | Clostridia   | Clostridiales   | Lachnospiraceae  |
| <b>seq24</b>   | Firmicutes    | Bacilli      | Lactobacillales | Lactobacillaceae |
| <b>seq268</b>  | Firmicutes    | Bacilli      | Lactobacillales | Lactobacillaceae |
| <b>seq330</b>  | Firmicutes    | Bacilli      | Lactobacillales | Lactobacillaceae |
| <b>seq517</b>  | Firmicutes    | Bacilli      | Lactobacillales | Lactobacillaceae |
| <b>seq685</b>  | Firmicutes    | Bacilli      | Lactobacillales | Lactobacillaceae |
| <b>seq791</b>  | Firmicutes    | Bacilli      | Lactobacillales | Lactobacillaceae |
| <b>seq896</b>  | Firmicutes    | Bacilli      | Lactobacillales | Lactobacillaceae |
| <b>seq1046</b> | Firmicutes    | Bacilli      | Lactobacillales | Lactobacillaceae |
| <b>seq1132</b> | Firmicutes    | Bacilli      | Lactobacillales | Lactobacillaceae |
| <b>seq1197</b> | Firmicutes    | Bacilli      | Lactobacillales | Lactobacillaceae |
| <b>seq1232</b> | Firmicutes    | Bacilli      | Lactobacillales | Lactobacillaceae |
| <b>seq1240</b> | Firmicutes    | Bacilli      | Lactobacillales | Lactobacillaceae |
| <b>seq1308</b> | Firmicutes    | Bacilli      | Lactobacillales | Lactobacillaceae |
| <b>seq1479</b> | Firmicutes    | Bacilli      | Lactobacillales | Lactobacillaceae |
| <b>seq1569</b> | Firmicutes    | Bacilli      | Lactobacillales | Lactobacillaceae |
| <b>seq1576</b> | Firmicutes    | Bacilli      | Lactobacillales | Lactobacillaceae |
| <b>seq1682</b> | Firmicutes    | Bacilli      | Lactobacillales | Lactobacillaceae |
| <b>seq1783</b> | Firmicutes    | Bacilli      | Lactobacillales | Lactobacillaceae |
| <b>seq1808</b> | Firmicutes    | Bacilli      | Lactobacillales | Lactobacillaceae |
| <b>seq1467</b> | Firmicutes    | Bacilli      | Lactobacillales | Lactobacillaceae |
| <b>seq1645</b> | Firmicutes    | Bacilli      | Lactobacillales | Lactobacillaceae |

Sequence Count Table

|                | <b>Phylum</b> | <b>Class</b> | <b>Genus</b>  | <b>Species</b> |
|----------------|---------------|--------------|---------------|----------------|
| <b>seq1748</b> | Firmicutes    | Clostridia   |               |                |
| <b>seq1772</b> | Firmicutes    | Clostridia   |               |                |
| <b>seq1786</b> | Firmicutes    | Clostridia   |               |                |
| <b>seq1790</b> | Firmicutes    | Clostridia   |               |                |
| <b>seq1792</b> | Firmicutes    | Clostridia   |               |                |
| <b>seq1802</b> | Firmicutes    | Clostridia   |               |                |
| <b>seq1803</b> | Firmicutes    | Clostridia   |               |                |
| <b>seq1847</b> | Firmicutes    | Clostridia   |               |                |
| <b>seq1900</b> | Firmicutes    | Clostridia   |               |                |
| <b>seq1901</b> | Firmicutes    | Clostridia   |               |                |
| <b>seq1903</b> | Firmicutes    | Clostridia   |               |                |
| <b>seq24</b>   | Firmicutes    | Bacilli      | Lactobacillus |                |
| <b>seq268</b>  | Firmicutes    | Bacilli      | Lactobacillus | ruminis        |
| <b>seq330</b>  | Firmicutes    | Bacilli      | Lactobacillus |                |
| <b>seq517</b>  | Firmicutes    | Bacilli      | Lactobacillus | intestinalis   |
| <b>seq685</b>  | Firmicutes    | Bacilli      | Lactobacillus |                |
| <b>seq791</b>  | Firmicutes    | Bacilli      | Lactobacillus |                |
| <b>seq896</b>  | Firmicutes    | Bacilli      | Lactobacillus |                |
| <b>seq1046</b> | Firmicutes    | Bacilli      | Lactobacillus | iners          |
| <b>seq1132</b> | Firmicutes    | Bacilli      | Lactobacillus |                |
| <b>seq1197</b> | Firmicutes    | Bacilli      | Lactobacillus |                |
| <b>seq1232</b> | Firmicutes    | Bacilli      | Lactobacillus |                |
| <b>seq1240</b> | Firmicutes    | Bacilli      | Lactobacillus |                |
| <b>seq1308</b> | Firmicutes    | Bacilli      | Lactobacillus |                |
| <b>seq1479</b> | Firmicutes    | Bacilli      | Lactobacillus | delbrueckii    |
| <b>seq1569</b> | Firmicutes    | Bacilli      | Lactobacillus |                |
| <b>seq1576</b> | Firmicutes    | Bacilli      | Lactobacillus |                |
| <b>seq1682</b> | Firmicutes    | Bacilli      | Lactobacillus | vaginalis      |
| <b>seq1783</b> | Firmicutes    | Bacilli      | Lactobacillus |                |
| <b>seq1808</b> | Firmicutes    | Bacilli      | Lactobacillus | algidus        |
| <b>seq1467</b> | Firmicutes    | Bacilli      | Pediococcus   |                |
| <b>seq1645</b> | Firmicutes    | Bacilli      | Pediococcus   | inopinatus     |

Sequence Count Table

|                | <b>Phylum</b> | <b>Class</b> | <b>Subject34WK0</b> | <b>Subject34WK12</b> | <b>Subject16WK0</b> | <b>Subject16WK12</b> |
|----------------|---------------|--------------|---------------------|----------------------|---------------------|----------------------|
| <b>seq1748</b> | Firmicutes    | Clostridia   | 0                   | 0                    | 0                   | 0                    |
| <b>seq1772</b> | Firmicutes    | Clostridia   | 0                   | 0                    | 0                   | 0                    |
| <b>seq1786</b> | Firmicutes    | Clostridia   | 0                   | 0                    | 0                   | 0                    |
| <b>seq1790</b> | Firmicutes    | Clostridia   | 0                   | 0                    | 0                   | 0                    |
| <b>seq1792</b> | Firmicutes    | Clostridia   | 0                   | 0                    | 0                   | 0                    |
| <b>seq1802</b> | Firmicutes    | Clostridia   | 0                   | 0                    | 0                   | 0                    |
| <b>seq1803</b> | Firmicutes    | Clostridia   | 0                   | 0                    | 0                   | 0                    |
| <b>seq1847</b> | Firmicutes    | Clostridia   | 0                   | 0                    | 0                   | 0                    |
| <b>seq1900</b> | Firmicutes    | Clostridia   | 0                   | 0                    | 0                   | 0                    |
| <b>seq1901</b> | Firmicutes    | Clostridia   | 0                   | 0                    | 0                   | 0                    |
| <b>seq1903</b> | Firmicutes    | Clostridia   | 0                   | 0                    | 0                   | 0                    |
| <b>seq24</b>   | Firmicutes    | Bacilli      | 0                   | 0                    | 0                   | 0                    |
| <b>seq268</b>  | Firmicutes    | Bacilli      | 0                   | 0                    | 0                   | 0                    |
| <b>seq330</b>  | Firmicutes    | Bacilli      | 51                  | 72                   | 38                  | 0                    |
| <b>seq517</b>  | Firmicutes    | Bacilli      | 0                   | 0                    | 0                   | 25                   |
| <b>seq685</b>  | Firmicutes    | Bacilli      | 0                   | 0                    | 20                  | 0                    |
| <b>seq791</b>  | Firmicutes    | Bacilli      | 0                   | 0                    | 0                   | 0                    |
| <b>seq896</b>  | Firmicutes    | Bacilli      | 0                   | 0                    | 0                   | 0                    |
| <b>seq1046</b> | Firmicutes    | Bacilli      | 0                   | 0                    | 0                   | 0                    |
| <b>seq1132</b> | Firmicutes    | Bacilli      | 0                   | 0                    | 0                   | 0                    |
| <b>seq1197</b> | Firmicutes    | Bacilli      | 0                   | 0                    | 0                   | 0                    |
| <b>seq1232</b> | Firmicutes    | Bacilli      | 0                   | 0                    | 0                   | 0                    |
| <b>seq1240</b> | Firmicutes    | Bacilli      | 0                   | 0                    | 0                   | 0                    |
| <b>seq1308</b> | Firmicutes    | Bacilli      | 0                   | 0                    | 0                   | 0                    |
| <b>seq1479</b> | Firmicutes    | Bacilli      | 0                   | 0                    | 0                   | 0                    |
| <b>seq1569</b> | Firmicutes    | Bacilli      | 0                   | 0                    | 0                   | 0                    |
| <b>seq1576</b> | Firmicutes    | Bacilli      | 0                   | 0                    | 0                   | 0                    |
| <b>seq1682</b> | Firmicutes    | Bacilli      | 0                   | 0                    | 0                   | 0                    |
| <b>seq1783</b> | Firmicutes    | Bacilli      | 0                   | 0                    | 0                   | 0                    |
| <b>seq1808</b> | Firmicutes    | Bacilli      | 0                   | 0                    | 0                   | 0                    |
| <b>seq1467</b> | Firmicutes    | Bacilli      | 0                   | 0                    | 0                   | 0                    |
| <b>seq1645</b> | Firmicutes    | Bacilli      | 0                   | 0                    | 0                   | 0                    |

Sequence Count Table

|                | <b>Phylum</b> | <b>Class</b> | <b>Subject17WK0</b> | <b>Subject17WK12</b> | <b>Subject1WK0</b> | <b>Subject1WK12</b> |
|----------------|---------------|--------------|---------------------|----------------------|--------------------|---------------------|
| <b>seq1748</b> | Firmicutes    | Clostridia   | 0                   | 0                    | 0                  | 0                   |
| <b>seq1772</b> | Firmicutes    | Clostridia   | 0                   | 0                    | 0                  | 0                   |
| <b>seq1786</b> | Firmicutes    | Clostridia   | 0                   | 0                    | 0                  | 0                   |
| <b>seq1790</b> | Firmicutes    | Clostridia   | 0                   | 0                    | 0                  | 0                   |
| <b>seq1792</b> | Firmicutes    | Clostridia   | 0                   | 0                    | 0                  | 0                   |
| <b>seq1802</b> | Firmicutes    | Clostridia   | 0                   | 0                    | 0                  | 0                   |
| <b>seq1803</b> | Firmicutes    | Clostridia   | 0                   | 0                    | 0                  | 0                   |
| <b>seq1847</b> | Firmicutes    | Clostridia   | 0                   | 0                    | 0                  | 0                   |
| <b>seq1900</b> | Firmicutes    | Clostridia   | 0                   | 0                    | 0                  | 0                   |
| <b>seq1901</b> | Firmicutes    | Clostridia   | 0                   | 0                    | 0                  | 0                   |
| <b>seq1903</b> | Firmicutes    | Clostridia   | 0                   | 0                    | 0                  | 0                   |
| <b>seq24</b>   | Firmicutes    | Bacilli      | 0                   | 0                    | 0                  | 0                   |
| <b>seq268</b>  | Firmicutes    | Bacilli      | 0                   | 0                    | 0                  | 0                   |
| <b>seq330</b>  | Firmicutes    | Bacilli      | 34                  | 25                   | 0                  | 31                  |
| <b>seq517</b>  | Firmicutes    | Bacilli      | 0                   | 0                    | 32                 | 0                   |
| <b>seq685</b>  | Firmicutes    | Bacilli      | 0                   | 20                   | 0                  | 0                   |
| <b>seq791</b>  | Firmicutes    | Bacilli      | 0                   | 0                    | 0                  | 0                   |
| <b>seq896</b>  | Firmicutes    | Bacilli      | 0                   | 0                    | 0                  | 0                   |
| <b>seq1046</b> | Firmicutes    | Bacilli      | 0                   | 0                    | 0                  | 0                   |
| <b>seq1132</b> | Firmicutes    | Bacilli      | 0                   | 0                    | 0                  | 0                   |
| <b>seq1197</b> | Firmicutes    | Bacilli      | 0                   | 0                    | 0                  | 0                   |
| <b>seq1232</b> | Firmicutes    | Bacilli      | 0                   | 0                    | 0                  | 0                   |
| <b>seq1240</b> | Firmicutes    | Bacilli      | 0                   | 0                    | 0                  | 0                   |
| <b>seq1308</b> | Firmicutes    | Bacilli      | 0                   | 0                    | 0                  | 0                   |
| <b>seq1479</b> | Firmicutes    | Bacilli      | 0                   | 0                    | 0                  | 0                   |
| <b>seq1569</b> | Firmicutes    | Bacilli      | 0                   | 0                    | 0                  | 0                   |
| <b>seq1576</b> | Firmicutes    | Bacilli      | 0                   | 0                    | 0                  | 0                   |
| <b>seq1682</b> | Firmicutes    | Bacilli      | 0                   | 0                    | 0                  | 0                   |
| <b>seq1783</b> | Firmicutes    | Bacilli      | 0                   | 0                    | 0                  | 0                   |
| <b>seq1808</b> | Firmicutes    | Bacilli      | 0                   | 0                    | 0                  | 0                   |
| <b>seq1467</b> | Firmicutes    | Bacilli      | 0                   | 0                    | 0                  | 0                   |
| <b>seq1645</b> | Firmicutes    | Bacilli      | 0                   | 0                    | 0                  | 0                   |



Sequence Count Table

|                | <b>Phylum</b> | <b>Class</b> | <b>Subject2WK0</b> | <b>Subject2WK12</b> | <b>Subject3WK0</b> | <b>Subject3WK12</b> |
|----------------|---------------|--------------|--------------------|---------------------|--------------------|---------------------|
| <b>seq1748</b> | Firmicutes    | Clostridia   | 0                  | 0                   | 0                  | 0                   |
| <b>seq1772</b> | Firmicutes    | Clostridia   | 0                  | 0                   | 0                  | 0                   |
| <b>seq1786</b> | Firmicutes    | Clostridia   | 0                  | 8                   | 0                  | 0                   |
| <b>seq1790</b> | Firmicutes    | Clostridia   | 0                  | 0                   | 0                  | 0                   |
| <b>seq1792</b> | Firmicutes    | Clostridia   | 0                  | 0                   | 0                  | 0                   |
| <b>seq1802</b> | Firmicutes    | Clostridia   | 0                  | 0                   | 0                  | 0                   |
| <b>seq1803</b> | Firmicutes    | Clostridia   | 0                  | 0                   | 0                  | 0                   |
| <b>seq1847</b> | Firmicutes    | Clostridia   | 0                  | 0                   | 0                  | 0                   |
| <b>seq1900</b> | Firmicutes    | Clostridia   | 0                  | 0                   | 0                  | 0                   |
| <b>seq1901</b> | Firmicutes    | Clostridia   | 0                  | 0                   | 0                  | 0                   |
| <b>seq1903</b> | Firmicutes    | Clostridia   | 0                  | 0                   | 0                  | 0                   |
| <b>seq24</b>   | Firmicutes    | Bacilli      | 667                | 0                   | 0                  | 0                   |
| <b>seq268</b>  | Firmicutes    | Bacilli      | 0                  | 0                   | 0                  | 0                   |
| <b>seq330</b>  | Firmicutes    | Bacilli      | 165                | 0                   | 35                 | 30                  |
| <b>seq517</b>  | Firmicutes    | Bacilli      | 0                  | 0                   | 36                 | 0                   |
| <b>seq685</b>  | Firmicutes    | Bacilli      | 0                  | 0                   | 0                  | 0                   |
| <b>seq791</b>  | Firmicutes    | Bacilli      | 0                  | 0                   | 0                  | 0                   |
| <b>seq896</b>  | Firmicutes    | Bacilli      | 0                  | 0                   | 0                  | 0                   |
| <b>seq1046</b> | Firmicutes    | Bacilli      | 0                  | 0                   | 0                  | 0                   |
| <b>seq1132</b> | Firmicutes    | Bacilli      | 0                  | 0                   | 0                  | 0                   |
| <b>seq1197</b> | Firmicutes    | Bacilli      | 0                  | 0                   | 0                  | 0                   |
| <b>seq1232</b> | Firmicutes    | Bacilli      | 46                 | 0                   | 0                  | 0                   |
| <b>seq1240</b> | Firmicutes    | Bacilli      | 6                  | 0                   | 0                  | 0                   |
| <b>seq1308</b> | Firmicutes    | Bacilli      | 0                  | 0                   | 0                  | 0                   |
| <b>seq1479</b> | Firmicutes    | Bacilli      | 0                  | 0                   | 0                  | 0                   |
| <b>seq1569</b> | Firmicutes    | Bacilli      | 0                  | 0                   | 0                  | 0                   |
| <b>seq1576</b> | Firmicutes    | Bacilli      | 0                  | 0                   | 0                  | 0                   |
| <b>seq1682</b> | Firmicutes    | Bacilli      | 0                  | 0                   | 0                  | 0                   |
| <b>seq1783</b> | Firmicutes    | Bacilli      | 0                  | 0                   | 0                  | 0                   |
| <b>seq1808</b> | Firmicutes    | Bacilli      | 0                  | 0                   | 0                  | 0                   |
| <b>seq1467</b> | Firmicutes    | Bacilli      | 0                  | 0                   | 0                  | 0                   |
| <b>seq1645</b> | Firmicutes    | Bacilli      | 0                  | 0                   | 0                  | 0                   |

Sequence Count Table

|                | <b>Phylum</b> | <b>Class</b> | <b>Subject4WK0</b> | <b>Subject4WK12</b> | <b>Subject5WK0</b> | <b>Subject5WK12</b> |
|----------------|---------------|--------------|--------------------|---------------------|--------------------|---------------------|
| <b>seq1748</b> | Firmicutes    | Clostridia   | 0                  | 0                   | 0                  | 0                   |
| <b>seq1772</b> | Firmicutes    | Clostridia   | 0                  | 0                   | 0                  | 0                   |
| <b>seq1786</b> | Firmicutes    | Clostridia   | 0                  | 0                   | 0                  | 0                   |
| <b>seq1790</b> | Firmicutes    | Clostridia   | 0                  | 0                   | 0                  | 0                   |
| <b>seq1792</b> | Firmicutes    | Clostridia   | 0                  | 0                   | 0                  | 0                   |
| <b>seq1802</b> | Firmicutes    | Clostridia   | 0                  | 0                   | 0                  | 0                   |
| <b>seq1803</b> | Firmicutes    | Clostridia   | 0                  | 0                   | 0                  | 0                   |
| <b>seq1847</b> | Firmicutes    | Clostridia   | 0                  | 5                   | 0                  | 0                   |
| <b>seq1900</b> | Firmicutes    | Clostridia   | 0                  | 0                   | 0                  | 0                   |
| <b>seq1901</b> | Firmicutes    | Clostridia   | 0                  | 0                   | 0                  | 0                   |
| <b>seq1903</b> | Firmicutes    | Clostridia   | 0                  | 0                   | 0                  | 0                   |
| <b>seq24</b>   | Firmicutes    | Bacilli      | 0                  | 0                   | 0                  | 0                   |
| <b>seq268</b>  | Firmicutes    | Bacilli      | 0                  | 0                   | 0                  | 0                   |
| <b>seq330</b>  | Firmicutes    | Bacilli      | 42                 | 0                   | 0                  | 46                  |
| <b>seq517</b>  | Firmicutes    | Bacilli      | 53                 | 47                  | 41                 | 0                   |
| <b>seq685</b>  | Firmicutes    | Bacilli      | 0                  | 33                  | 0                  | 35                  |
| <b>seq791</b>  | Firmicutes    | Bacilli      | 0                  | 0                   | 0                  | 0                   |
| <b>seq896</b>  | Firmicutes    | Bacilli      | 0                  | 0                   | 0                  | 0                   |
| <b>seq1046</b> | Firmicutes    | Bacilli      | 0                  | 0                   | 0                  | 0                   |
| <b>seq1132</b> | Firmicutes    | Bacilli      | 0                  | 0                   | 0                  | 0                   |
| <b>seq1197</b> | Firmicutes    | Bacilli      | 0                  | 0                   | 0                  | 0                   |
| <b>seq1232</b> | Firmicutes    | Bacilli      | 0                  | 0                   | 0                  | 0                   |
| <b>seq1240</b> | Firmicutes    | Bacilli      | 0                  | 0                   | 0                  | 0                   |
| <b>seq1308</b> | Firmicutes    | Bacilli      | 0                  | 0                   | 0                  | 0                   |
| <b>seq1479</b> | Firmicutes    | Bacilli      | 0                  | 0                   | 0                  | 0                   |
| <b>seq1569</b> | Firmicutes    | Bacilli      | 0                  | 0                   | 0                  | 0                   |
| <b>seq1576</b> | Firmicutes    | Bacilli      | 0                  | 0                   | 0                  | 0                   |
| <b>seq1682</b> | Firmicutes    | Bacilli      | 0                  | 0                   | 0                  | 0                   |
| <b>seq1783</b> | Firmicutes    | Bacilli      | 0                  | 0                   | 0                  | 0                   |
| <b>seq1808</b> | Firmicutes    | Bacilli      | 0                  | 0                   | 0                  | 7                   |
| <b>seq1467</b> | Firmicutes    | Bacilli      | 0                  | 8                   | 0                  | 0                   |
| <b>seq1645</b> | Firmicutes    | Bacilli      | 0                  | 0                   | 0                  | 0                   |

Sequence Count Table

|                | <b>Phylum</b> | <b>Class</b> | <b>Subject6WK0</b> | <b>Subject6WK12</b> | <b>Subject18WK0</b> | <b>Subject18WK12</b> |
|----------------|---------------|--------------|--------------------|---------------------|---------------------|----------------------|
| <b>seq1748</b> | Firmicutes    | Clostridia   | 0                  | 0                   | 0                   | 0                    |
| <b>seq1772</b> | Firmicutes    | Clostridia   | 0                  | 0                   | 0                   | 0                    |
| <b>seq1786</b> | Firmicutes    | Clostridia   | 0                  | 0                   | 0                   | 0                    |
| <b>seq1790</b> | Firmicutes    | Clostridia   | 0                  | 8                   | 0                   | 0                    |
| <b>seq1792</b> | Firmicutes    | Clostridia   | 0                  | 0                   | 8                   | 0                    |
| <b>seq1802</b> | Firmicutes    | Clostridia   | 0                  | 0                   | 0                   | 0                    |
| <b>seq1803</b> | Firmicutes    | Clostridia   | 0                  | 0                   | 0                   | 0                    |
| <b>seq1847</b> | Firmicutes    | Clostridia   | 0                  | 0                   | 0                   | 0                    |
| <b>seq1900</b> | Firmicutes    | Clostridia   | 0                  | 0                   | 0                   | 0                    |
| <b>seq1901</b> | Firmicutes    | Clostridia   | 0                  | 0                   | 0                   | 0                    |
| <b>seq1903</b> | Firmicutes    | Clostridia   | 0                  | 0                   | 0                   | 0                    |
| <b>seq24</b>   | Firmicutes    | Bacilli      | 0                  | 0                   | 0                   | 0                    |
| <b>seq268</b>  | Firmicutes    | Bacilli      | 0                  | 0                   | 0                   | 0                    |
| <b>seq330</b>  | Firmicutes    | Bacilli      | 99                 | 53                  | 63                  | 37                   |
| <b>seq517</b>  | Firmicutes    | Bacilli      | 0                  | 0                   | 70                  | 46                   |
| <b>seq685</b>  | Firmicutes    | Bacilli      | 41                 | 0                   | 0                   | 0                    |
| <b>seq791</b>  | Firmicutes    | Bacilli      | 0                  | 0                   | 0                   | 0                    |
| <b>seq896</b>  | Firmicutes    | Bacilli      | 0                  | 0                   | 0                   | 0                    |
| <b>seq1046</b> | Firmicutes    | Bacilli      | 0                  | 0                   | 0                   | 0                    |
| <b>seq1132</b> | Firmicutes    | Bacilli      | 0                  | 0                   | 0                   | 0                    |
| <b>seq1197</b> | Firmicutes    | Bacilli      | 0                  | 0                   | 0                   | 0                    |
| <b>seq1232</b> | Firmicutes    | Bacilli      | 0                  | 0                   | 0                   | 0                    |
| <b>seq1240</b> | Firmicutes    | Bacilli      | 4                  | 0                   | 0                   | 0                    |
| <b>seq1308</b> | Firmicutes    | Bacilli      | 0                  | 0                   | 0                   | 0                    |
| <b>seq1479</b> | Firmicutes    | Bacilli      | 0                  | 0                   | 0                   | 0                    |
| <b>seq1569</b> | Firmicutes    | Bacilli      | 0                  | 0                   | 0                   | 0                    |
| <b>seq1576</b> | Firmicutes    | Bacilli      | 0                  | 0                   | 0                   | 0                    |
| <b>seq1682</b> | Firmicutes    | Bacilli      | 0                  | 0                   | 0                   | 0                    |
| <b>seq1783</b> | Firmicutes    | Bacilli      | 0                  | 0                   | 0                   | 0                    |
| <b>seq1808</b> | Firmicutes    | Bacilli      | 0                  | 0                   | 0                   | 0                    |
| <b>seq1467</b> | Firmicutes    | Bacilli      | 0                  | 0                   | 0                   | 0                    |
| <b>seq1645</b> | Firmicutes    | Bacilli      | 0                  | 16                  | 0                   | 0                    |

Sequence Count Table

|                | <b>Phylum</b> | <b>Class</b> | <b>Subject19WK0</b> | <b>Subject19WK12</b> | <b>Subject20WK0</b> | <b>Subject20WK12</b> |
|----------------|---------------|--------------|---------------------|----------------------|---------------------|----------------------|
| <b>seq1748</b> | Firmicutes    | Clostridia   | 0                   | 0                    | 10                  | 0                    |
| <b>seq1772</b> | Firmicutes    | Clostridia   | 0                   | 0                    | 0                   | 0                    |
| <b>seq1786</b> | Firmicutes    | Clostridia   | 0                   | 0                    | 0                   | 0                    |
| <b>seq1790</b> | Firmicutes    | Clostridia   | 0                   | 0                    | 0                   | 0                    |
| <b>seq1792</b> | Firmicutes    | Clostridia   | 0                   | 0                    | 0                   | 0                    |
| <b>seq1802</b> | Firmicutes    | Clostridia   | 0                   | 0                    | 0                   | 0                    |
| <b>seq1803</b> | Firmicutes    | Clostridia   | 0                   | 0                    | 0                   | 0                    |
| <b>seq1847</b> | Firmicutes    | Clostridia   | 0                   | 0                    | 0                   | 0                    |
| <b>seq1900</b> | Firmicutes    | Clostridia   | 0                   | 0                    | 0                   | 0                    |
| <b>seq1901</b> | Firmicutes    | Clostridia   | 0                   | 0                    | 0                   | 0                    |
| <b>seq1903</b> | Firmicutes    | Clostridia   | 0                   | 0                    | 0                   | 0                    |
| <b>seq24</b>   | Firmicutes    | Bacilli      | 0                   | 0                    | 0                   | 0                    |
| <b>seq268</b>  | Firmicutes    | Bacilli      | 0                   | 0                    | 120                 | 131                  |
| <b>seq330</b>  | Firmicutes    | Bacilli      | 0                   | 0                    | 0                   | 0                    |
| <b>seq517</b>  | Firmicutes    | Bacilli      | 0                   | 0                    | 0                   | 0                    |
| <b>seq685</b>  | Firmicutes    | Bacilli      | 0                   | 0                    | 0                   | 0                    |
| <b>seq791</b>  | Firmicutes    | Bacilli      | 0                   | 0                    | 0                   | 0                    |
| <b>seq896</b>  | Firmicutes    | Bacilli      | 0                   | 0                    | 0                   | 0                    |
| <b>seq1046</b> | Firmicutes    | Bacilli      | 0                   | 0                    | 40                  | 0                    |
| <b>seq1132</b> | Firmicutes    | Bacilli      | 0                   | 0                    | 0                   | 0                    |
| <b>seq1197</b> | Firmicutes    | Bacilli      | 0                   | 0                    | 0                   | 0                    |
| <b>seq1232</b> | Firmicutes    | Bacilli      | 0                   | 0                    | 0                   | 0                    |
| <b>seq1240</b> | Firmicutes    | Bacilli      | 0                   | 0                    | 0                   | 0                    |
| <b>seq1308</b> | Firmicutes    | Bacilli      | 0                   | 0                    | 0                   | 0                    |
| <b>seq1479</b> | Firmicutes    | Bacilli      | 0                   | 0                    | 0                   | 0                    |
| <b>seq1569</b> | Firmicutes    | Bacilli      | 0                   | 0                    | 0                   | 0                    |
| <b>seq1576</b> | Firmicutes    | Bacilli      | 0                   | 0                    | 0                   | 0                    |
| <b>seq1682</b> | Firmicutes    | Bacilli      | 0                   | 0                    | 0                   | 0                    |
| <b>seq1783</b> | Firmicutes    | Bacilli      | 0                   | 0                    | 0                   | 0                    |
| <b>seq1808</b> | Firmicutes    | Bacilli      | 0                   | 0                    | 0                   | 0                    |
| <b>seq1467</b> | Firmicutes    | Bacilli      | 0                   | 0                    | 0                   | 0                    |
| <b>seq1645</b> | Firmicutes    | Bacilli      | 0                   | 0                    | 0                   | 0                    |

Sequence Count Table

|                | <b>Phylum</b> | <b>Class</b> | <b>Subject7WK0</b> | <b>Subject7WK12</b> | <b>Subject21WK0</b> | <b>Subject21WK12</b> |
|----------------|---------------|--------------|--------------------|---------------------|---------------------|----------------------|
| <b>seq1748</b> | Firmicutes    | Clostridia   | 0                  | 0                   | 0                   | 0                    |
| <b>seq1772</b> | Firmicutes    | Clostridia   | 0                  | 0                   | 0                   | 0                    |
| <b>seq1786</b> | Firmicutes    | Clostridia   | 0                  | 0                   | 0                   | 0                    |
| <b>seq1790</b> | Firmicutes    | Clostridia   | 0                  | 0                   | 0                   | 0                    |
| <b>seq1792</b> | Firmicutes    | Clostridia   | 0                  | 0                   | 0                   | 0                    |
| <b>seq1802</b> | Firmicutes    | Clostridia   | 0                  | 0                   | 0                   | 0                    |
| <b>seq1803</b> | Firmicutes    | Clostridia   | 0                  | 0                   | 0                   | 0                    |
| <b>seq1847</b> | Firmicutes    | Clostridia   | 0                  | 0                   | 0                   | 0                    |
| <b>seq1900</b> | Firmicutes    | Clostridia   | 0                  | 0                   | 0                   | 0                    |
| <b>seq1901</b> | Firmicutes    | Clostridia   | 0                  | 0                   | 0                   | 0                    |
| <b>seq1903</b> | Firmicutes    | Clostridia   | 0                  | 0                   | 0                   | 0                    |
| <b>seq24</b>   | Firmicutes    | Bacilli      | 0                  | 0                   | 0                   | 0                    |
| <b>seq268</b>  | Firmicutes    | Bacilli      | 0                  | 0                   | 0                   | 0                    |
| <b>seq330</b>  | Firmicutes    | Bacilli      | 0                  | 0                   | 0                   | 0                    |
| <b>seq517</b>  | Firmicutes    | Bacilli      | 0                  | 0                   | 0                   | 0                    |
| <b>seq685</b>  | Firmicutes    | Bacilli      | 0                  | 0                   | 0                   | 0                    |
| <b>seq791</b>  | Firmicutes    | Bacilli      | 0                  | 0                   | 0                   | 0                    |
| <b>seq896</b>  | Firmicutes    | Bacilli      | 0                  | 0                   | 0                   | 0                    |
| <b>seq1046</b> | Firmicutes    | Bacilli      | 0                  | 0                   | 0                   | 0                    |
| <b>seq1132</b> | Firmicutes    | Bacilli      | 0                  | 0                   | 0                   | 0                    |
| <b>seq1197</b> | Firmicutes    | Bacilli      | 0                  | 0                   | 0                   | 81                   |
| <b>seq1232</b> | Firmicutes    | Bacilli      | 0                  | 0                   | 0                   | 0                    |
| <b>seq1240</b> | Firmicutes    | Bacilli      | 0                  | 0                   | 0                   | 0                    |
| <b>seq1308</b> | Firmicutes    | Bacilli      | 0                  | 0                   | 0                   | 0                    |
| <b>seq1479</b> | Firmicutes    | Bacilli      | 0                  | 0                   | 0                   | 0                    |
| <b>seq1569</b> | Firmicutes    | Bacilli      | 0                  | 0                   | 0                   | 0                    |
| <b>seq1576</b> | Firmicutes    | Bacilli      | 0                  | 0                   | 0                   | 0                    |
| <b>seq1682</b> | Firmicutes    | Bacilli      | 0                  | 0                   | 0                   | 0                    |
| <b>seq1783</b> | Firmicutes    | Bacilli      | 0                  | 0                   | 0                   | 0                    |
| <b>seq1808</b> | Firmicutes    | Bacilli      | 0                  | 0                   | 0                   | 0                    |
| <b>seq1467</b> | Firmicutes    | Bacilli      | 0                  | 0                   | 0                   | 0                    |
| <b>seq1645</b> | Firmicutes    | Bacilli      | 0                  | 0                   | 0                   | 0                    |

Sequence Count Table

|                | <b>Phylum</b> | <b>Class</b> | <b>Subject8WK0</b> | <b>Subject8WK12</b> | <b>Subject9WK0</b> | <b>Subject9WK12</b> |
|----------------|---------------|--------------|--------------------|---------------------|--------------------|---------------------|
| <b>seq1748</b> | Firmicutes    | Clostridia   | 0                  | 0                   | 0                  | 0                   |
| <b>seq1772</b> | Firmicutes    | Clostridia   | 0                  | 0                   | 9                  | 0                   |
| <b>seq1786</b> | Firmicutes    | Clostridia   | 0                  | 0                   | 0                  | 0                   |
| <b>seq1790</b> | Firmicutes    | Clostridia   | 0                  | 0                   | 0                  | 0                   |
| <b>seq1792</b> | Firmicutes    | Clostridia   | 0                  | 0                   | 0                  | 0                   |
| <b>seq1802</b> | Firmicutes    | Clostridia   | 0                  | 0                   | 0                  | 0                   |
| <b>seq1803</b> | Firmicutes    | Clostridia   | 0                  | 0                   | 0                  | 0                   |
| <b>seq1847</b> | Firmicutes    | Clostridia   | 0                  | 0                   | 0                  | 0                   |
| <b>seq1900</b> | Firmicutes    | Clostridia   | 0                  | 0                   | 0                  | 0                   |
| <b>seq1901</b> | Firmicutes    | Clostridia   | 0                  | 0                   | 0                  | 0                   |
| <b>seq1903</b> | Firmicutes    | Clostridia   | 0                  | 0                   | 0                  | 0                   |
| <b>seq24</b>   | Firmicutes    | Bacilli      | 0                  | 0                   | 0                  | 0                   |
| <b>seq268</b>  | Firmicutes    | Bacilli      | 0                  | 0                   | 0                  | 0                   |
| <b>seq330</b>  | Firmicutes    | Bacilli      | 235                | 0                   | 0                  | 0                   |
| <b>seq517</b>  | Firmicutes    | Bacilli      | 167                | 0                   | 0                  | 0                   |
| <b>seq685</b>  | Firmicutes    | Bacilli      | 178                | 0                   | 0                  | 0                   |
| <b>seq791</b>  | Firmicutes    | Bacilli      | 0                  | 0                   | 0                  | 0                   |
| <b>seq896</b>  | Firmicutes    | Bacilli      | 0                  | 0                   | 0                  | 0                   |
| <b>seq1046</b> | Firmicutes    | Bacilli      | 0                  | 0                   | 0                  | 0                   |
| <b>seq1132</b> | Firmicutes    | Bacilli      | 0                  | 0                   | 0                  | 0                   |
| <b>seq1197</b> | Firmicutes    | Bacilli      | 0                  | 0                   | 0                  | 0                   |
| <b>seq1232</b> | Firmicutes    | Bacilli      | 0                  | 0                   | 0                  | 0                   |
| <b>seq1240</b> | Firmicutes    | Bacilli      | 0                  | 0                   | 0                  | 0                   |
| <b>seq1308</b> | Firmicutes    | Bacilli      | 0                  | 55                  | 0                  | 0                   |
| <b>seq1479</b> | Firmicutes    | Bacilli      | 0                  | 0                   | 0                  | 0                   |
| <b>seq1569</b> | Firmicutes    | Bacilli      | 0                  | 0                   | 0                  | 0                   |
| <b>seq1576</b> | Firmicutes    | Bacilli      | 0                  | 0                   | 0                  | 0                   |
| <b>seq1682</b> | Firmicutes    | Bacilli      | 0                  | 0                   | 0                  | 0                   |
| <b>seq1783</b> | Firmicutes    | Bacilli      | 0                  | 0                   | 0                  | 0                   |
| <b>seq1808</b> | Firmicutes    | Bacilli      | 0                  | 0                   | 0                  | 0                   |
| <b>seq1467</b> | Firmicutes    | Bacilli      | 0                  | 0                   | 0                  | 0                   |
| <b>seq1645</b> | Firmicutes    | Bacilli      | 0                  | 0                   | 0                  | 0                   |

Sequence Count Table

|                | <b>Phylum</b> | <b>Class</b> | <b>Subject10WK0</b> | <b>Subject10WK12</b> | <b>Subject22WK0</b> | <b>Subject22WK12</b> |
|----------------|---------------|--------------|---------------------|----------------------|---------------------|----------------------|
| <b>seq1748</b> | Firmicutes    | Clostridia   | 0                   | 0                    | 0                   | 0                    |
| <b>seq1772</b> | Firmicutes    | Clostridia   | 0                   | 0                    | 0                   | 0                    |
| <b>seq1786</b> | Firmicutes    | Clostridia   | 0                   | 0                    | 0                   | 0                    |
| <b>seq1790</b> | Firmicutes    | Clostridia   | 0                   | 0                    | 0                   | 0                    |
| <b>seq1792</b> | Firmicutes    | Clostridia   | 0                   | 0                    | 0                   | 0                    |
| <b>seq1802</b> | Firmicutes    | Clostridia   | 0                   | 0                    | 0                   | 0                    |
| <b>seq1803</b> | Firmicutes    | Clostridia   | 0                   | 0                    | 0                   | 0                    |
| <b>seq1847</b> | Firmicutes    | Clostridia   | 0                   | 0                    | 0                   | 0                    |
| <b>seq1900</b> | Firmicutes    | Clostridia   | 0                   | 0                    | 0                   | 0                    |
| <b>seq1901</b> | Firmicutes    | Clostridia   | 0                   | 0                    | 0                   | 0                    |
| <b>seq1903</b> | Firmicutes    | Clostridia   | 0                   | 0                    | 0                   | 0                    |
| <b>seq24</b>   | Firmicutes    | Bacilli      | 0                   | 0                    | 0                   | 0                    |
| <b>seq268</b>  | Firmicutes    | Bacilli      | 0                   | 0                    | 1653                | 959                  |
| <b>seq330</b>  | Firmicutes    | Bacilli      | 165                 | 0                    | 0                   | 0                    |
| <b>seq517</b>  | Firmicutes    | Bacilli      | 107                 | 0                    | 0                   | 0                    |
| <b>seq685</b>  | Firmicutes    | Bacilli      | 0                   | 20                   | 0                   | 0                    |
| <b>seq791</b>  | Firmicutes    | Bacilli      | 0                   | 0                    | 0                   | 0                    |
| <b>seq896</b>  | Firmicutes    | Bacilli      | 0                   | 0                    | 0                   | 0                    |
| <b>seq1046</b> | Firmicutes    | Bacilli      | 0                   | 0                    | 52                  | 0                    |
| <b>seq1132</b> | Firmicutes    | Bacilli      | 0                   | 0                    | 0                   | 0                    |
| <b>seq1197</b> | Firmicutes    | Bacilli      | 0                   | 0                    | 0                   | 0                    |
| <b>seq1232</b> | Firmicutes    | Bacilli      | 0                   | 0                    | 0                   | 0                    |
| <b>seq1240</b> | Firmicutes    | Bacilli      | 0                   | 20                   | 0                   | 0                    |
| <b>seq1308</b> | Firmicutes    | Bacilli      | 0                   | 0                    | 0                   | 0                    |
| <b>seq1479</b> | Firmicutes    | Bacilli      | 0                   | 0                    | 0                   | 0                    |
| <b>seq1569</b> | Firmicutes    | Bacilli      | 0                   | 22                   | 0                   | 0                    |
| <b>seq1576</b> | Firmicutes    | Bacilli      | 0                   | 0                    | 0                   | 0                    |
| <b>seq1682</b> | Firmicutes    | Bacilli      | 0                   | 0                    | 0                   | 0                    |
| <b>seq1783</b> | Firmicutes    | Bacilli      | 0                   | 0                    | 0                   | 0                    |
| <b>seq1808</b> | Firmicutes    | Bacilli      | 0                   | 0                    | 0                   | 0                    |
| <b>seq1467</b> | Firmicutes    | Bacilli      | 0                   | 0                    | 0                   | 0                    |
| <b>seq1645</b> | Firmicutes    | Bacilli      | 0                   | 0                    | 0                   | 0                    |

Sequence Count Table

|                | <b>Phylum</b> | <b>Class</b> | <b>Subject23WK0</b> | <b>Subject23WK12</b> | <b>Subject24WK0</b> | <b>Subject24WK12</b> |
|----------------|---------------|--------------|---------------------|----------------------|---------------------|----------------------|
| <b>seq1748</b> | Firmicutes    | Clostridia   | 0                   | 0                    | 0                   | 0                    |
| <b>seq1772</b> | Firmicutes    | Clostridia   | 0                   | 0                    | 0                   | 0                    |
| <b>seq1786</b> | Firmicutes    | Clostridia   | 0                   | 0                    | 0                   | 0                    |
| <b>seq1790</b> | Firmicutes    | Clostridia   | 0                   | 0                    | 0                   | 0                    |
| <b>seq1792</b> | Firmicutes    | Clostridia   | 0                   | 0                    | 0                   | 0                    |
| <b>seq1802</b> | Firmicutes    | Clostridia   | 0                   | 0                    | 0                   | 0                    |
| <b>seq1803</b> | Firmicutes    | Clostridia   | 0                   | 0                    | 0                   | 0                    |
| <b>seq1847</b> | Firmicutes    | Clostridia   | 0                   | 0                    | 0                   | 0                    |
| <b>seq1900</b> | Firmicutes    | Clostridia   | 2                   | 0                    | 0                   | 0                    |
| <b>seq1901</b> | Firmicutes    | Clostridia   | 0                   | 2                    | 0                   | 0                    |
| <b>seq1903</b> | Firmicutes    | Clostridia   | 0                   | 0                    | 0                   | 0                    |
| <b>seq24</b>   | Firmicutes    | Bacilli      | 12                  | 13                   | 0                   | 0                    |
| <b>seq268</b>  | Firmicutes    | Bacilli      | 0                   | 0                    | 0                   | 0                    |
| <b>seq330</b>  | Firmicutes    | Bacilli      | 78                  | 29                   | 32                  | 0                    |
| <b>seq517</b>  | Firmicutes    | Bacilli      | 0                   | 0                    | 0                   | 0                    |
| <b>seq685</b>  | Firmicutes    | Bacilli      | 0                   | 0                    | 0                   | 0                    |
| <b>seq791</b>  | Firmicutes    | Bacilli      | 0                   | 0                    | 0                   | 123                  |
| <b>seq896</b>  | Firmicutes    | Bacilli      | 0                   | 0                    | 0                   | 0                    |
| <b>seq1046</b> | Firmicutes    | Bacilli      | 0                   | 0                    | 0                   | 0                    |
| <b>seq1132</b> | Firmicutes    | Bacilli      | 0                   | 0                    | 0                   | 0                    |
| <b>seq1197</b> | Firmicutes    | Bacilli      | 0                   | 0                    | 0                   | 0                    |
| <b>seq1232</b> | Firmicutes    | Bacilli      | 0                   | 0                    | 0                   | 0                    |
| <b>seq1240</b> | Firmicutes    | Bacilli      | 0                   | 0                    | 0                   | 0                    |
| <b>seq1308</b> | Firmicutes    | Bacilli      | 0                   | 0                    | 0                   | 0                    |
| <b>seq1479</b> | Firmicutes    | Bacilli      | 0                   | 0                    | 0                   | 0                    |
| <b>seq1569</b> | Firmicutes    | Bacilli      | 0                   | 0                    | 0                   | 0                    |
| <b>seq1576</b> | Firmicutes    | Bacilli      | 0                   | 0                    | 0                   | 0                    |
| <b>seq1682</b> | Firmicutes    | Bacilli      | 0                   | 14                   | 0                   | 0                    |
| <b>seq1783</b> | Firmicutes    | Bacilli      | 0                   | 0                    | 0                   | 0                    |
| <b>seq1808</b> | Firmicutes    | Bacilli      | 0                   | 0                    | 0                   | 0                    |
| <b>seq1467</b> | Firmicutes    | Bacilli      | 0                   | 0                    | 0                   | 0                    |
| <b>seq1645</b> | Firmicutes    | Bacilli      | 0                   | 0                    | 0                   | 0                    |



Sequence Count Table

|                | <b>Phylum</b> | <b>Class</b> | <b>Subject11WK0</b> | <b>Subject11WK12</b> | <b>Subject12WK0</b> | <b>Subject12WK12</b> |
|----------------|---------------|--------------|---------------------|----------------------|---------------------|----------------------|
| <b>seq1748</b> | Firmicutes    | Clostridia   | 0                   | 0                    | 0                   | 0                    |
| <b>seq1772</b> | Firmicutes    | Clostridia   | 0                   | 0                    | 0                   | 0                    |
| <b>seq1786</b> | Firmicutes    | Clostridia   | 0                   | 0                    | 0                   | 0                    |
| <b>seq1790</b> | Firmicutes    | Clostridia   | 0                   | 0                    | 0                   | 0                    |
| <b>seq1792</b> | Firmicutes    | Clostridia   | 0                   | 0                    | 0                   | 0                    |
| <b>seq1802</b> | Firmicutes    | Clostridia   | 0                   | 0                    | 0                   | 0                    |
| <b>seq1803</b> | Firmicutes    | Clostridia   | 0                   | 0                    | 0                   | 0                    |
| <b>seq1847</b> | Firmicutes    | Clostridia   | 0                   | 0                    | 0                   | 0                    |
| <b>seq1900</b> | Firmicutes    | Clostridia   | 0                   | 0                    | 0                   | 0                    |
| <b>seq1901</b> | Firmicutes    | Clostridia   | 0                   | 0                    | 0                   | 0                    |
| <b>seq1903</b> | Firmicutes    | Clostridia   | 0                   | 0                    | 0                   | 0                    |
| <b>seq24</b>   | Firmicutes    | Bacilli      | 0                   | 0                    | 0                   | 0                    |
| <b>seq268</b>  | Firmicutes    | Bacilli      | 0                   | 0                    | 0                   | 0                    |
| <b>seq330</b>  | Firmicutes    | Bacilli      | 45                  | 26                   | 0                   | 0                    |
| <b>seq517</b>  | Firmicutes    | Bacilli      | 0                   | 0                    | 0                   | 0                    |
| <b>seq685</b>  | Firmicutes    | Bacilli      | 0                   | 0                    | 6                   | 0                    |
| <b>seq791</b>  | Firmicutes    | Bacilli      | 0                   | 0                    | 0                   | 0                    |
| <b>seq896</b>  | Firmicutes    | Bacilli      | 0                   | 0                    | 0                   | 48                   |
| <b>seq1046</b> | Firmicutes    | Bacilli      | 0                   | 0                    | 0                   | 0                    |
| <b>seq1132</b> | Firmicutes    | Bacilli      | 0                   | 0                    | 0                   | 0                    |
| <b>seq1197</b> | Firmicutes    | Bacilli      | 0                   | 0                    | 0                   | 0                    |
| <b>seq1232</b> | Firmicutes    | Bacilli      | 0                   | 0                    | 0                   | 0                    |
| <b>seq1240</b> | Firmicutes    | Bacilli      | 26                  | 0                    | 0                   | 0                    |
| <b>seq1308</b> | Firmicutes    | Bacilli      | 0                   | 0                    | 0                   | 0                    |
| <b>seq1479</b> | Firmicutes    | Bacilli      | 31                  | 0                    | 0                   | 0                    |
| <b>seq1569</b> | Firmicutes    | Bacilli      | 0                   | 0                    | 0                   | 0                    |
| <b>seq1576</b> | Firmicutes    | Bacilli      | 0                   | 0                    | 0                   | 0                    |
| <b>seq1682</b> | Firmicutes    | Bacilli      | 0                   | 0                    | 0                   | 0                    |
| <b>seq1783</b> | Firmicutes    | Bacilli      | 0                   | 0                    | 0                   | 0                    |
| <b>seq1808</b> | Firmicutes    | Bacilli      | 0                   | 0                    | 0                   | 0                    |
| <b>seq1467</b> | Firmicutes    | Bacilli      | 0                   | 0                    | 0                   | 0                    |
| <b>seq1645</b> | Firmicutes    | Bacilli      | 0                   | 0                    | 0                   | 0                    |

Sequence Count Table

|                | <b>Phylum</b> | <b>Class</b> | <b>Subject25WK0</b> | <b>Subject25WK12</b> | <b>Subject38WK0</b> | <b>Subject38WK12</b> |
|----------------|---------------|--------------|---------------------|----------------------|---------------------|----------------------|
| <b>seq1748</b> | Firmicutes    | Clostridia   | 0                   | 0                    | 0                   | 0                    |
| <b>seq1772</b> | Firmicutes    | Clostridia   | 0                   | 0                    | 0                   | 0                    |
| <b>seq1786</b> | Firmicutes    | Clostridia   | 0                   | 0                    | 0                   | 0                    |
| <b>seq1790</b> | Firmicutes    | Clostridia   | 0                   | 0                    | 0                   | 0                    |
| <b>seq1792</b> | Firmicutes    | Clostridia   | 0                   | 0                    | 0                   | 0                    |
| <b>seq1802</b> | Firmicutes    | Clostridia   | 0                   | 0                    | 0                   | 0                    |
| <b>seq1803</b> | Firmicutes    | Clostridia   | 0                   | 0                    | 0                   | 0                    |
| <b>seq1847</b> | Firmicutes    | Clostridia   | 0                   | 0                    | 0                   | 0                    |
| <b>seq1900</b> | Firmicutes    | Clostridia   | 0                   | 0                    | 0                   | 0                    |
| <b>seq1901</b> | Firmicutes    | Clostridia   | 0                   | 0                    | 0                   | 0                    |
| <b>seq1903</b> | Firmicutes    | Clostridia   | 2                   | 0                    | 0                   | 0                    |
| <b>seq24</b>   | Firmicutes    | Bacilli      | 16                  | 0                    | 0                   | 0                    |
| <b>seq268</b>  | Firmicutes    | Bacilli      | 0                   | 0                    | 0                   | 0                    |
| <b>seq330</b>  | Firmicutes    | Bacilli      | 49                  | 50                   | 0                   | 6                    |
| <b>seq517</b>  | Firmicutes    | Bacilli      | 0                   | 0                    | 0                   | 0                    |
| <b>seq685</b>  | Firmicutes    | Bacilli      | 0                   | 0                    | 0                   | 0                    |
| <b>seq791</b>  | Firmicutes    | Bacilli      | 0                   | 0                    | 0                   | 0                    |
| <b>seq896</b>  | Firmicutes    | Bacilli      | 0                   | 0                    | 0                   | 0                    |
| <b>seq1046</b> | Firmicutes    | Bacilli      | 0                   | 0                    | 0                   | 0                    |
| <b>seq1132</b> | Firmicutes    | Bacilli      | 0                   | 0                    | 0                   | 0                    |
| <b>seq1197</b> | Firmicutes    | Bacilli      | 0                   | 0                    | 0                   | 0                    |
| <b>seq1232</b> | Firmicutes    | Bacilli      | 0                   | 0                    | 0                   | 0                    |
| <b>seq1240</b> | Firmicutes    | Bacilli      | 0                   | 0                    | 0                   | 0                    |
| <b>seq1308</b> | Firmicutes    | Bacilli      | 0                   | 0                    | 0                   | 0                    |
| <b>seq1479</b> | Firmicutes    | Bacilli      | 0                   | 0                    | 0                   | 0                    |
| <b>seq1569</b> | Firmicutes    | Bacilli      | 0                   | 0                    | 0                   | 0                    |
| <b>seq1576</b> | Firmicutes    | Bacilli      | 0                   | 0                    | 0                   | 0                    |
| <b>seq1682</b> | Firmicutes    | Bacilli      | 0                   | 0                    | 0                   | 0                    |
| <b>seq1783</b> | Firmicutes    | Bacilli      | 0                   | 0                    | 0                   | 0                    |
| <b>seq1808</b> | Firmicutes    | Bacilli      | 0                   | 0                    | 0                   | 0                    |
| <b>seq1467</b> | Firmicutes    | Bacilli      | 0                   | 0                    | 0                   | 0                    |
| <b>seq1645</b> | Firmicutes    | Bacilli      | 0                   | 0                    | 0                   | 0                    |

Sequence Count Table

|                | <b>Phylum</b> | <b>Class</b> | <b>Subject31WK0</b> | <b>Subject31WK12</b> | <b>Subject32WK0</b> | <b>Subject32WK12</b> |
|----------------|---------------|--------------|---------------------|----------------------|---------------------|----------------------|
| <b>seq1748</b> | Firmicutes    | Clostridia   | 0                   | 0                    | 0                   | 0                    |
| <b>seq1772</b> | Firmicutes    | Clostridia   | 0                   | 0                    | 0                   | 0                    |
| <b>seq1786</b> | Firmicutes    | Clostridia   | 0                   | 0                    | 0                   | 0                    |
| <b>seq1790</b> | Firmicutes    | Clostridia   | 0                   | 0                    | 0                   | 0                    |
| <b>seq1792</b> | Firmicutes    | Clostridia   | 0                   | 0                    | 0                   | 0                    |
| <b>seq1802</b> | Firmicutes    | Clostridia   | 0                   | 0                    | 0                   | 0                    |
| <b>seq1803</b> | Firmicutes    | Clostridia   | 0                   | 0                    | 0                   | 0                    |
| <b>seq1847</b> | Firmicutes    | Clostridia   | 0                   | 0                    | 0                   | 0                    |
| <b>seq1900</b> | Firmicutes    | Clostridia   | 0                   | 0                    | 0                   | 0                    |
| <b>seq1901</b> | Firmicutes    | Clostridia   | 0                   | 0                    | 0                   | 0                    |
| <b>seq1903</b> | Firmicutes    | Clostridia   | 0                   | 0                    | 0                   | 0                    |
| <b>seq24</b>   | Firmicutes    | Bacilli      | 0                   | 0                    | 0                   | 0                    |
| <b>seq268</b>  | Firmicutes    | Bacilli      | 0                   | 0                    | 0                   | 0                    |
| <b>seq330</b>  | Firmicutes    | Bacilli      | 0                   | 0                    | 0                   | 0                    |
| <b>seq517</b>  | Firmicutes    | Bacilli      | 0                   | 0                    | 0                   | 0                    |
| <b>seq685</b>  | Firmicutes    | Bacilli      | 0                   | 0                    | 0                   | 0                    |
| <b>seq791</b>  | Firmicutes    | Bacilli      | 0                   | 0                    | 0                   | 0                    |
| <b>seq896</b>  | Firmicutes    | Bacilli      | 0                   | 0                    | 0                   | 0                    |
| <b>seq1046</b> | Firmicutes    | Bacilli      | 0                   | 0                    | 0                   | 0                    |
| <b>seq1132</b> | Firmicutes    | Bacilli      | 0                   | 0                    | 0                   | 0                    |
| <b>seq1197</b> | Firmicutes    | Bacilli      | 0                   | 0                    | 0                   | 0                    |
| <b>seq1232</b> | Firmicutes    | Bacilli      | 0                   | 0                    | 0                   | 0                    |
| <b>seq1240</b> | Firmicutes    | Bacilli      | 0                   | 0                    | 0                   | 0                    |
| <b>seq1308</b> | Firmicutes    | Bacilli      | 0                   | 0                    | 0                   | 0                    |
| <b>seq1479</b> | Firmicutes    | Bacilli      | 0                   | 0                    | 0                   | 0                    |
| <b>seq1569</b> | Firmicutes    | Bacilli      | 0                   | 0                    | 0                   | 0                    |
| <b>seq1576</b> | Firmicutes    | Bacilli      | 0                   | 0                    | 0                   | 0                    |
| <b>seq1682</b> | Firmicutes    | Bacilli      | 0                   | 0                    | 0                   | 0                    |
| <b>seq1783</b> | Firmicutes    | Bacilli      | 0                   | 0                    | 0                   | 0                    |
| <b>seq1808</b> | Firmicutes    | Bacilli      | 0                   | 0                    | 0                   | 0                    |
| <b>seq1467</b> | Firmicutes    | Bacilli      | 0                   | 0                    | 0                   | 0                    |
| <b>seq1645</b> | Firmicutes    | Bacilli      | 0                   | 0                    | 0                   | 0                    |

Sequence Count Table

|                | <b>Phylum</b> | <b>Class</b> | <b>Subject13WK0</b> | <b>Subject13WK12</b> | <b>Subject39WK0</b> | <b>Subject39WK12</b> |
|----------------|---------------|--------------|---------------------|----------------------|---------------------|----------------------|
| <b>seq1748</b> | Firmicutes    | Clostridia   | 0                   | 0                    | 0                   | 0                    |
| <b>seq1772</b> | Firmicutes    | Clostridia   | 0                   | 0                    | 0                   | 0                    |
| <b>seq1786</b> | Firmicutes    | Clostridia   | 0                   | 0                    | 0                   | 0                    |
| <b>seq1790</b> | Firmicutes    | Clostridia   | 0                   | 0                    | 0                   | 0                    |
| <b>seq1792</b> | Firmicutes    | Clostridia   | 0                   | 0                    | 0                   | 0                    |
| <b>seq1802</b> | Firmicutes    | Clostridia   | 0                   | 8                    | 0                   | 0                    |
| <b>seq1803</b> | Firmicutes    | Clostridia   | 0                   | 0                    | 0                   | 0                    |
| <b>seq1847</b> | Firmicutes    | Clostridia   | 0                   | 0                    | 0                   | 0                    |
| <b>seq1900</b> | Firmicutes    | Clostridia   | 0                   | 0                    | 0                   | 0                    |
| <b>seq1901</b> | Firmicutes    | Clostridia   | 0                   | 0                    | 0                   | 0                    |
| <b>seq1903</b> | Firmicutes    | Clostridia   | 0                   | 0                    | 0                   | 0                    |
| <b>seq24</b>   | Firmicutes    | Bacilli      | 0                   | 0                    | 0                   | 0                    |
| <b>seq268</b>  | Firmicutes    | Bacilli      | 0                   | 0                    | 0                   | 0                    |
| <b>seq330</b>  | Firmicutes    | Bacilli      | 0                   | 0                    | 5                   | 15                   |
| <b>seq517</b>  | Firmicutes    | Bacilli      | 0                   | 0                    | 0                   | 0                    |
| <b>seq685</b>  | Firmicutes    | Bacilli      | 0                   | 0                    | 0                   | 0                    |
| <b>seq791</b>  | Firmicutes    | Bacilli      | 0                   | 0                    | 0                   | 9                    |
| <b>seq896</b>  | Firmicutes    | Bacilli      | 0                   | 0                    | 0                   | 0                    |
| <b>seq1046</b> | Firmicutes    | Bacilli      | 0                   | 0                    | 0                   | 0                    |
| <b>seq1132</b> | Firmicutes    | Bacilli      | 0                   | 0                    | 0                   | 0                    |
| <b>seq1197</b> | Firmicutes    | Bacilli      | 0                   | 0                    | 0                   | 0                    |
| <b>seq1232</b> | Firmicutes    | Bacilli      | 0                   | 0                    | 0                   | 0                    |
| <b>seq1240</b> | Firmicutes    | Bacilli      | 0                   | 0                    | 0                   | 0                    |
| <b>seq1308</b> | Firmicutes    | Bacilli      | 0                   | 0                    | 0                   | 0                    |
| <b>seq1479</b> | Firmicutes    | Bacilli      | 0                   | 0                    | 0                   | 0                    |
| <b>seq1569</b> | Firmicutes    | Bacilli      | 0                   | 0                    | 0                   | 0                    |
| <b>seq1576</b> | Firmicutes    | Bacilli      | 0                   | 0                    | 0                   | 0                    |
| <b>seq1682</b> | Firmicutes    | Bacilli      | 0                   | 0                    | 0                   | 0                    |
| <b>seq1783</b> | Firmicutes    | Bacilli      | 0                   | 0                    | 0                   | 0                    |
| <b>seq1808</b> | Firmicutes    | Bacilli      | 0                   | 0                    | 0                   | 0                    |
| <b>seq1467</b> | Firmicutes    | Bacilli      | 24                  | 0                    | 0                   | 0                    |
| <b>seq1645</b> | Firmicutes    | Bacilli      | 0                   | 0                    | 0                   | 0                    |

Sequence Count Table

|                | <b>Phylum</b> | <b>Class</b> | <b>Subject26WK0</b> | <b>Subject26WK12</b> | <b>Subject14WK0</b> | <b>Subject14WK12</b> |
|----------------|---------------|--------------|---------------------|----------------------|---------------------|----------------------|
| <b>seq1748</b> | Firmicutes    | Clostridia   | 0                   | 0                    | 0                   | 0                    |
| <b>seq1772</b> | Firmicutes    | Clostridia   | 0                   | 0                    | 0                   | 0                    |
| <b>seq1786</b> | Firmicutes    | Clostridia   | 0                   | 0                    | 0                   | 0                    |
| <b>seq1790</b> | Firmicutes    | Clostridia   | 0                   | 0                    | 0                   | 0                    |
| <b>seq1792</b> | Firmicutes    | Clostridia   | 0                   | 0                    | 0                   | 0                    |
| <b>seq1802</b> | Firmicutes    | Clostridia   | 0                   | 0                    | 0                   | 0                    |
| <b>seq1803</b> | Firmicutes    | Clostridia   | 8                   | 0                    | 0                   | 0                    |
| <b>seq1847</b> | Firmicutes    | Clostridia   | 0                   | 0                    | 0                   | 0                    |
| <b>seq1900</b> | Firmicutes    | Clostridia   | 0                   | 0                    | 0                   | 0                    |
| <b>seq1901</b> | Firmicutes    | Clostridia   | 0                   | 0                    | 0                   | 0                    |
| <b>seq1903</b> | Firmicutes    | Clostridia   | 0                   | 0                    | 0                   | 0                    |
| <b>seq24</b>   | Firmicutes    | Bacilli      | 71                  | 0                    | 0                   | 0                    |
| <b>seq268</b>  | Firmicutes    | Bacilli      | 0                   | 0                    | 0                   | 0                    |
| <b>seq330</b>  | Firmicutes    | Bacilli      | 77                  | 17                   | 30                  | 36                   |
| <b>seq517</b>  | Firmicutes    | Bacilli      | 0                   | 0                    | 35                  | 28                   |
| <b>seq685</b>  | Firmicutes    | Bacilli      | 14                  | 10                   | 0                   | 0                    |
| <b>seq791</b>  | Firmicutes    | Bacilli      | 0                   | 0                    | 0                   | 0                    |
| <b>seq896</b>  | Firmicutes    | Bacilli      | 24                  | 0                    | 0                   | 0                    |
| <b>seq1046</b> | Firmicutes    | Bacilli      | 34                  | 0                    | 0                   | 0                    |
| <b>seq1132</b> | Firmicutes    | Bacilli      | 0                   | 0                    | 0                   | 0                    |
| <b>seq1197</b> | Firmicutes    | Bacilli      | 0                   | 0                    | 0                   | 0                    |
| <b>seq1232</b> | Firmicutes    | Bacilli      | 0                   | 0                    | 0                   | 0                    |
| <b>seq1240</b> | Firmicutes    | Bacilli      | 0                   | 0                    | 0                   | 0                    |
| <b>seq1308</b> | Firmicutes    | Bacilli      | 0                   | 0                    | 0                   | 0                    |
| <b>seq1479</b> | Firmicutes    | Bacilli      | 0                   | 0                    | 0                   | 0                    |
| <b>seq1569</b> | Firmicutes    | Bacilli      | 0                   | 0                    | 0                   | 0                    |
| <b>seq1576</b> | Firmicutes    | Bacilli      | 0                   | 0                    | 0                   | 0                    |
| <b>seq1682</b> | Firmicutes    | Bacilli      | 0                   | 0                    | 0                   | 0                    |
| <b>seq1783</b> | Firmicutes    | Bacilli      | 0                   | 0                    | 0                   | 0                    |
| <b>seq1808</b> | Firmicutes    | Bacilli      | 0                   | 0                    | 0                   | 0                    |
| <b>seq1467</b> | Firmicutes    | Bacilli      | 0                   | 0                    | 0                   | 0                    |
| <b>seq1645</b> | Firmicutes    | Bacilli      | 0                   | 0                    | 0                   | 0                    |

Sequence Count Table

|                | <b>Phylum</b> | <b>Class</b> | <b>Subject27WK0</b> | <b>Subject27WK12</b> | <b>Subject15WK0</b> | <b>Subject15WK12</b> |
|----------------|---------------|--------------|---------------------|----------------------|---------------------|----------------------|
| <b>seq1748</b> | Firmicutes    | Clostridia   | 0                   | 0                    | 0                   | 0                    |
| <b>seq1772</b> | Firmicutes    | Clostridia   | 0                   | 0                    | 0                   | 0                    |
| <b>seq1786</b> | Firmicutes    | Clostridia   | 0                   | 0                    | 0                   | 0                    |
| <b>seq1790</b> | Firmicutes    | Clostridia   | 0                   | 0                    | 0                   | 0                    |
| <b>seq1792</b> | Firmicutes    | Clostridia   | 0                   | 0                    | 0                   | 0                    |
| <b>seq1802</b> | Firmicutes    | Clostridia   | 0                   | 0                    | 0                   | 0                    |
| <b>seq1803</b> | Firmicutes    | Clostridia   | 0                   | 0                    | 0                   | 0                    |
| <b>seq1847</b> | Firmicutes    | Clostridia   | 0                   | 0                    | 0                   | 0                    |
| <b>seq1900</b> | Firmicutes    | Clostridia   | 0                   | 0                    | 0                   | 0                    |
| <b>seq1901</b> | Firmicutes    | Clostridia   | 0                   | 0                    | 0                   | 0                    |
| <b>seq1903</b> | Firmicutes    | Clostridia   | 0                   | 0                    | 0                   | 0                    |
| <b>seq24</b>   | Firmicutes    | Bacilli      | 32694               | 34097                | 0                   | 0                    |
| <b>seq268</b>  | Firmicutes    | Bacilli      | 0                   | 0                    | 0                   | 0                    |
| <b>seq330</b>  | Firmicutes    | Bacilli      | 0                   | 74                   | 39                  | 22                   |
| <b>seq517</b>  | Firmicutes    | Bacilli      | 0                   | 0                    | 0                   | 39                   |
| <b>seq685</b>  | Firmicutes    | Bacilli      | 0                   | 0                    | 0                   | 20                   |
| <b>seq791</b>  | Firmicutes    | Bacilli      | 0                   | 0                    | 149                 | 0                    |
| <b>seq896</b>  | Firmicutes    | Bacilli      | 22                  | 106                  | 0                   | 0                    |
| <b>seq1046</b> | Firmicutes    | Bacilli      | 0                   | 0                    | 0                   | 0                    |
| <b>seq1132</b> | Firmicutes    | Bacilli      | 0                   | 0                    | 98                  | 0                    |
| <b>seq1197</b> | Firmicutes    | Bacilli      | 0                   | 0                    | 0                   | 0                    |
| <b>seq1232</b> | Firmicutes    | Bacilli      | 0                   | 0                    | 25                  | 0                    |
| <b>seq1240</b> | Firmicutes    | Bacilli      | 0                   | 13                   | 0                   | 0                    |
| <b>seq1308</b> | Firmicutes    | Bacilli      | 0                   | 0                    | 0                   | 0                    |
| <b>seq1479</b> | Firmicutes    | Bacilli      | 0                   | 0                    | 0                   | 0                    |
| <b>seq1569</b> | Firmicutes    | Bacilli      | 0                   | 0                    | 0                   | 0                    |
| <b>seq1576</b> | Firmicutes    | Bacilli      | 0                   | 0                    | 0                   | 22                   |
| <b>seq1682</b> | Firmicutes    | Bacilli      | 0                   | 0                    | 0                   | 0                    |
| <b>seq1783</b> | Firmicutes    | Bacilli      | 0                   | 9                    | 0                   | 0                    |
| <b>seq1808</b> | Firmicutes    | Bacilli      | 0                   | 0                    | 0                   | 0                    |
| <b>seq1467</b> | Firmicutes    | Bacilli      | 0                   | 0                    | 0                   | 0                    |
| <b>seq1645</b> | Firmicutes    | Bacilli      | 0                   | 0                    | 0                   | 0                    |

Sequence Count Table

|                | <b>Phylum</b> | <b>Class</b> | <b>Δ</b> |  |  |  |
|----------------|---------------|--------------|----------|--|--|--|
| <b>seq1748</b> | Firmicutes    | Clostridia   |          |  |  |  |
| <b>seq1772</b> | Firmicutes    | Clostridia   |          |  |  |  |
| <b>seq1786</b> | Firmicutes    | Clostridia   |          |  |  |  |
| <b>seq1790</b> | Firmicutes    | Clostridia   |          |  |  |  |
| <b>seq1792</b> | Firmicutes    | Clostridia   |          |  |  |  |
| <b>seq1802</b> | Firmicutes    | Clostridia   |          |  |  |  |
| <b>seq1803</b> | Firmicutes    | Clostridia   |          |  |  |  |
| <b>seq1847</b> | Firmicutes    | Clostridia   |          |  |  |  |
| <b>seq1900</b> | Firmicutes    | Clostridia   |          |  |  |  |
| <b>seq1901</b> | Firmicutes    | Clostridia   |          |  |  |  |
| <b>seq1903</b> | Firmicutes    | Clostridia   |          |  |  |  |
| <b>seq24</b>   | Firmicutes    | Bacilli      |          |  |  |  |
| <b>seq268</b>  | Firmicutes    | Bacilli      |          |  |  |  |
| <b>seq330</b>  | Firmicutes    | Bacilli      |          |  |  |  |
| <b>seq517</b>  | Firmicutes    | Bacilli      |          |  |  |  |
| <b>seq685</b>  | Firmicutes    | Bacilli      |          |  |  |  |
| <b>seq791</b>  | Firmicutes    | Bacilli      |          |  |  |  |
| <b>seq896</b>  | Firmicutes    | Bacilli      |          |  |  |  |
| <b>seq1046</b> | Firmicutes    | Bacilli      |          |  |  |  |
| <b>seq1132</b> | Firmicutes    | Bacilli      |          |  |  |  |
| <b>seq1197</b> | Firmicutes    | Bacilli      |          |  |  |  |
| <b>seq1232</b> | Firmicutes    | Bacilli      |          |  |  |  |
| <b>seq1240</b> | Firmicutes    | Bacilli      |          |  |  |  |
| <b>seq1308</b> | Firmicutes    | Bacilli      |          |  |  |  |
| <b>seq1479</b> | Firmicutes    | Bacilli      |          |  |  |  |
| <b>seq1569</b> | Firmicutes    | Bacilli      |          |  |  |  |
| <b>seq1576</b> | Firmicutes    | Bacilli      |          |  |  |  |
| <b>seq1682</b> | Firmicutes    | Bacilli      |          |  |  |  |
| <b>seq1783</b> | Firmicutes    | Bacilli      |          |  |  |  |
| <b>seq1808</b> | Firmicutes    | Bacilli      |          |  |  |  |
| <b>seq1467</b> | Firmicutes    | Bacilli      |          |  |  |  |
| <b>seq1645</b> | Firmicutes    | Bacilli      |          |  |  |  |

Sequence Count Table

|                | <b>Phylum</b> | <b>Class</b> | <b>Order</b>    | <b>Family</b>         |
|----------------|---------------|--------------|-----------------|-----------------------|
| <b>seq1453</b> | Firmicutes    | Bacilli      | Lactobacillales | Leuconostocaceae      |
| <b>seq1574</b> | Firmicutes    | Bacilli      | Lactobacillales | Leuconostocaceae      |
| <b>seq1638</b> | Firmicutes    | Bacilli      | Lactobacillales | Leuconostocaceae      |
| <b>seq1640</b> | Firmicutes    | Bacilli      | Lactobacillales | Leuconostocaceae      |
| <b>seq1887</b> | Firmicutes    | Bacilli      | Lactobacillales | Leuconostocaceae      |
| <b>seq1342</b> | Firmicutes    | Bacilli      | Lactobacillales | Leuconostocaceae      |
| <b>seq1757</b> | Firmicutes    | Bacilli      | Lactobacillales | Leuconostocaceae      |
| <b>seq1817</b> | Firmicutes    | Bacilli      | Lactobacillales | Leuconostocaceae      |
| <b>seq304</b>  | Firmicutes    | Clostridia   | Clostridiales   | Peptococcaceae        |
| <b>seq632</b>  | Firmicutes    | Clostridia   | Clostridiales   | Peptococcaceae        |
| <b>seq1759</b> | Firmicutes    | Clostridia   | Clostridiales   | Peptococcaceae        |
| <b>seq514</b>  | Firmicutes    | Clostridia   | Clostridiales   | Peptococcaceae        |
| <b>seq658</b>  | Firmicutes    | Clostridia   | Clostridiales   | Peptococcaceae        |
| <b>seq955</b>  | Firmicutes    | Clostridia   | Clostridiales   | Peptococcaceae        |
| <b>seq1337</b> | Firmicutes    | Clostridia   | Clostridiales   | Peptococcaceae        |
| <b>seq1352</b> | Firmicutes    | Clostridia   | Clostridiales   | Peptococcaceae        |
| <b>seq1372</b> | Firmicutes    | Clostridia   | Clostridiales   | Peptococcaceae        |
| <b>seq1377</b> | Firmicutes    | Clostridia   | Clostridiales   | Peptococcaceae        |
| <b>seq1446</b> | Firmicutes    | Clostridia   | Clostridiales   | Peptococcaceae        |
| <b>seq1605</b> | Firmicutes    | Clostridia   | Clostridiales   | Peptococcaceae        |
| <b>seq1663</b> | Firmicutes    | Clostridia   | Clostridiales   | Peptococcaceae        |
| <b>seq1664</b> | Firmicutes    | Clostridia   | Clostridiales   | Peptococcaceae        |
| <b>seq1725</b> | Firmicutes    | Clostridia   | Clostridiales   | Peptococcaceae        |
| <b>seq1742</b> | Firmicutes    | Clostridia   | Clostridiales   | Peptococcaceae        |
| <b>seq1776</b> | Firmicutes    | Clostridia   | Clostridiales   | Peptococcaceae        |
| <b>seq1777</b> | Firmicutes    | Clostridia   | Clostridiales   | Peptococcaceae        |
| <b>seq1821</b> | Firmicutes    | Clostridia   | Clostridiales   | Peptococcaceae        |
| <b>seq1822</b> | Firmicutes    | Clostridia   | Clostridiales   | Peptococcaceae        |
| <b>seq1850</b> | Firmicutes    | Clostridia   | Clostridiales   | Peptococcaceae        |
| <b>seq836</b>  | Firmicutes    | Clostridia   | Clostridiales   | Peptostreptococcaceae |
| <b>seq62</b>   | Firmicutes    | Clostridia   | Clostridiales   | Peptostreptococcaceae |
| <b>seq175</b>  | Firmicutes    | Clostridia   | Clostridiales   | Peptostreptococcaceae |



Sequence Count Table

|                | <b>Phylum</b> | <b>Class</b> | <b>Genus</b>     | <b>Species</b> |
|----------------|---------------|--------------|------------------|----------------|
| <b>seq1453</b> | Firmicutes    | Bacilli      | Leuconostoc      |                |
| <b>seq1574</b> | Firmicutes    | Bacilli      | Leuconostoc      |                |
| <b>seq1638</b> | Firmicutes    | Bacilli      | Leuconostoc      |                |
| <b>seq1640</b> | Firmicutes    | Bacilli      | Leuconostoc      |                |
| <b>seq1887</b> | Firmicutes    | Bacilli      | Leuconostoc      |                |
| <b>seq1342</b> | Firmicutes    | Bacilli      | Weissella        |                |
| <b>seq1757</b> | Firmicutes    | Bacilli      | Weissella        |                |
| <b>seq1817</b> | Firmicutes    | Bacilli      | Weissella        | halotolerans   |
| <b>seq304</b>  | Firmicutes    | Clostridia   | Peptococcus      |                |
| <b>seq632</b>  | Firmicutes    | Clostridia   | Peptococcus      |                |
| <b>seq1759</b> | Firmicutes    | Clostridia   | Peptococcus      | niger          |
| <b>seq514</b>  | Firmicutes    | Clostridia   |                  |                |
| <b>seq658</b>  | Firmicutes    | Clostridia   |                  |                |
| <b>seq955</b>  | Firmicutes    | Clostridia   |                  |                |
| <b>seq1337</b> | Firmicutes    | Clostridia   |                  |                |
| <b>seq1352</b> | Firmicutes    | Clostridia   |                  |                |
| <b>seq1372</b> | Firmicutes    | Clostridia   |                  |                |
| <b>seq1377</b> | Firmicutes    | Clostridia   |                  |                |
| <b>seq1446</b> | Firmicutes    | Clostridia   |                  |                |
| <b>seq1605</b> | Firmicutes    | Clostridia   |                  |                |
| <b>seq1663</b> | Firmicutes    | Clostridia   |                  |                |
| <b>seq1664</b> | Firmicutes    | Clostridia   |                  |                |
| <b>seq1725</b> | Firmicutes    | Clostridia   |                  |                |
| <b>seq1742</b> | Firmicutes    | Clostridia   |                  |                |
| <b>seq1776</b> | Firmicutes    | Clostridia   |                  |                |
| <b>seq1777</b> | Firmicutes    | Clostridia   |                  |                |
| <b>seq1821</b> | Firmicutes    | Clostridia   |                  |                |
| <b>seq1822</b> | Firmicutes    | Clostridia   |                  |                |
| <b>seq1850</b> | Firmicutes    | Clostridia   |                  |                |
| <b>seq836</b>  | Firmicutes    | Clostridia   | Clostridioides   | difficile      |
| <b>seq62</b>   | Firmicutes    | Clostridia   | Intestinibacter  | bartlettii     |
| <b>seq175</b>  | Firmicutes    | Clostridia   | Peptoclostridium |                |

Sequence Count Table

|                | <b>Phylum</b> | <b>Class</b> | <b>Subject34WK0</b> | <b>Subject34WK12</b> | <b>Subject16WK0</b> | <b>Subject16WK12</b> |
|----------------|---------------|--------------|---------------------|----------------------|---------------------|----------------------|
| <b>seq1453</b> | Firmicutes    | Bacilli      | 0                   | 0                    | 0                   | 0                    |
| <b>seq1574</b> | Firmicutes    | Bacilli      | 0                   | 0                    | 0                   | 0                    |
| <b>seq1638</b> | Firmicutes    | Bacilli      | 0                   | 0                    | 0                   | 0                    |
| <b>seq1640</b> | Firmicutes    | Bacilli      | 0                   | 0                    | 0                   | 0                    |
| <b>seq1887</b> | Firmicutes    | Bacilli      | 0                   | 0                    | 0                   | 0                    |
| <b>seq1342</b> | Firmicutes    | Bacilli      | 0                   | 0                    | 0                   | 0                    |
| <b>seq1757</b> | Firmicutes    | Bacilli      | 0                   | 0                    | 0                   | 0                    |
| <b>seq1817</b> | Firmicutes    | Bacilli      | 0                   | 0                    | 0                   | 0                    |
| <b>seq304</b>  | Firmicutes    | Clostridia   | 0                   | 0                    | 0                   | 0                    |
| <b>seq632</b>  | Firmicutes    | Clostridia   | 0                   | 0                    | 0                   | 0                    |
| <b>seq1759</b> | Firmicutes    | Clostridia   | 0                   | 0                    | 0                   | 0                    |
| <b>seq514</b>  | Firmicutes    | Clostridia   | 0                   | 0                    | 0                   | 0                    |
| <b>seq658</b>  | Firmicutes    | Clostridia   | 0                   | 4                    | 0                   | 0                    |
| <b>seq955</b>  | Firmicutes    | Clostridia   | 0                   | 0                    | 0                   | 0                    |
| <b>seq1337</b> | Firmicutes    | Clostridia   | 0                   | 0                    | 0                   | 0                    |
| <b>seq1352</b> | Firmicutes    | Clostridia   | 0                   | 0                    | 0                   | 0                    |
| <b>seq1372</b> | Firmicutes    | Clostridia   | 0                   | 0                    | 0                   | 0                    |
| <b>seq1377</b> | Firmicutes    | Clostridia   | 0                   | 0                    | 0                   | 0                    |
| <b>seq1446</b> | Firmicutes    | Clostridia   | 0                   | 0                    | 0                   | 0                    |
| <b>seq1605</b> | Firmicutes    | Clostridia   | 0                   | 0                    | 0                   | 0                    |
| <b>seq1663</b> | Firmicutes    | Clostridia   | 0                   | 0                    | 0                   | 0                    |
| <b>seq1664</b> | Firmicutes    | Clostridia   | 0                   | 0                    | 0                   | 0                    |
| <b>seq1725</b> | Firmicutes    | Clostridia   | 0                   | 0                    | 0                   | 0                    |
| <b>seq1742</b> | Firmicutes    | Clostridia   | 0                   | 0                    | 0                   | 0                    |
| <b>seq1776</b> | Firmicutes    | Clostridia   | 0                   | 0                    | 0                   | 0                    |
| <b>seq1777</b> | Firmicutes    | Clostridia   | 0                   | 0                    | 0                   | 0                    |
| <b>seq1821</b> | Firmicutes    | Clostridia   | 0                   | 0                    | 0                   | 0                    |
| <b>seq1822</b> | Firmicutes    | Clostridia   | 0                   | 0                    | 0                   | 0                    |
| <b>seq1850</b> | Firmicutes    | Clostridia   | 0                   | 0                    | 0                   | 0                    |
| <b>seq836</b>  | Firmicutes    | Clostridia   | 0                   | 0                    | 0                   | 0                    |
| <b>seq62</b>   | Firmicutes    | Clostridia   | 17                  | 44                   | 228                 | 156                  |
| <b>seq175</b>  | Firmicutes    | Clostridia   | 0                   | 0                    | 0                   | 0                    |

Sequence Count Table

|                | <b>Phylum</b> | <b>Class</b> | <b>Subject17WK0</b> | <b>Subject17WK12</b> | <b>Subject1WK0</b> | <b>Subject1WK12</b> |
|----------------|---------------|--------------|---------------------|----------------------|--------------------|---------------------|
| <b>seq1453</b> | Firmicutes    | Bacilli      | 0                   | 0                    | 0                  | 0                   |
| <b>seq1574</b> | Firmicutes    | Bacilli      | 0                   | 0                    | 0                  | 0                   |
| <b>seq1638</b> | Firmicutes    | Bacilli      | 0                   | 0                    | 0                  | 0                   |
| <b>seq1640</b> | Firmicutes    | Bacilli      | 0                   | 0                    | 0                  | 0                   |
| <b>seq1887</b> | Firmicutes    | Bacilli      | 0                   | 0                    | 0                  | 0                   |
| <b>seq1342</b> | Firmicutes    | Bacilli      | 0                   | 0                    | 0                  | 0                   |
| <b>seq1757</b> | Firmicutes    | Bacilli      | 0                   | 0                    | 0                  | 0                   |
| <b>seq1817</b> | Firmicutes    | Bacilli      | 0                   | 0                    | 0                  | 0                   |
| <b>seq304</b>  | Firmicutes    | Clostridia   | 0                   | 0                    | 0                  | 0                   |
| <b>seq632</b>  | Firmicutes    | Clostridia   | 0                   | 0                    | 0                  | 0                   |
| <b>seq1759</b> | Firmicutes    | Clostridia   | 0                   | 0                    | 0                  | 0                   |
| <b>seq514</b>  | Firmicutes    | Clostridia   | 29                  | 147                  | 62                 | 75                  |
| <b>seq658</b>  | Firmicutes    | Clostridia   | 0                   | 0                    | 0                  | 0                   |
| <b>seq955</b>  | Firmicutes    | Clostridia   | 0                   | 0                    | 0                  | 0                   |
| <b>seq1337</b> | Firmicutes    | Clostridia   | 0                   | 8                    | 0                  | 0                   |
| <b>seq1352</b> | Firmicutes    | Clostridia   | 0                   | 0                    | 0                  | 0                   |
| <b>seq1372</b> | Firmicutes    | Clostridia   | 0                   | 0                    | 0                  | 0                   |
| <b>seq1377</b> | Firmicutes    | Clostridia   | 10                  | 11                   | 0                  | 0                   |
| <b>seq1446</b> | Firmicutes    | Clostridia   | 0                   | 0                    | 0                  | 7                   |
| <b>seq1605</b> | Firmicutes    | Clostridia   | 0                   | 0                    | 0                  | 0                   |
| <b>seq1663</b> | Firmicutes    | Clostridia   | 0                   | 0                    | 0                  | 0                   |
| <b>seq1664</b> | Firmicutes    | Clostridia   | 0                   | 0                    | 0                  | 0                   |
| <b>seq1725</b> | Firmicutes    | Clostridia   | 0                   | 0                    | 0                  | 0                   |
| <b>seq1742</b> | Firmicutes    | Clostridia   | 0                   | 7                    | 3                  | 0                   |
| <b>seq1776</b> | Firmicutes    | Clostridia   | 0                   | 0                    | 0                  | 0                   |
| <b>seq1777</b> | Firmicutes    | Clostridia   | 0                   | 0                    | 0                  | 0                   |
| <b>seq1821</b> | Firmicutes    | Clostridia   | 0                   | 0                    | 0                  | 0                   |
| <b>seq1822</b> | Firmicutes    | Clostridia   | 0                   | 0                    | 0                  | 0                   |
| <b>seq1850</b> | Firmicutes    | Clostridia   | 0                   | 0                    | 0                  | 0                   |
| <b>seq836</b>  | Firmicutes    | Clostridia   | 0                   | 0                    | 0                  | 0                   |
| <b>seq62</b>   | Firmicutes    | Clostridia   | 23                  | 1018                 | 0                  | 11                  |
| <b>seq175</b>  | Firmicutes    | Clostridia   | 0                   | 0                    | 0                  | 0                   |

Sequence Count Table

|                | <b>Phylum</b> | <b>Class</b> | <b>Subject2WK0</b> | <b>Subject2WK12</b> | <b>Subject3WK0</b> | <b>Subject3WK12</b> |
|----------------|---------------|--------------|--------------------|---------------------|--------------------|---------------------|
| <b>seq1453</b> | Firmicutes    | Bacilli      | 0                  | 0                   | 0                  | 0                   |
| <b>seq1574</b> | Firmicutes    | Bacilli      | 0                  | 0                   | 0                  | 0                   |
| <b>seq1638</b> | Firmicutes    | Bacilli      | 0                  | 0                   | 0                  | 0                   |
| <b>seq1640</b> | Firmicutes    | Bacilli      | 0                  | 0                   | 0                  | 0                   |
| <b>seq1887</b> | Firmicutes    | Bacilli      | 0                  | 0                   | 0                  | 0                   |
| <b>seq1342</b> | Firmicutes    | Bacilli      | 0                  | 0                   | 0                  | 0                   |
| <b>seq1757</b> | Firmicutes    | Bacilli      | 0                  | 0                   | 0                  | 0                   |
| <b>seq1817</b> | Firmicutes    | Bacilli      | 0                  | 0                   | 0                  | 0                   |
| <b>seq304</b>  | Firmicutes    | Clostridia   | 0                  | 0                   | 0                  | 0                   |
| <b>seq632</b>  | Firmicutes    | Clostridia   | 0                  | 0                   | 0                  | 0                   |
| <b>seq1759</b> | Firmicutes    | Clostridia   | 0                  | 0                   | 0                  | 0                   |
| <b>seq514</b>  | Firmicutes    | Clostridia   | 0                  | 0                   | 0                  | 0                   |
| <b>seq658</b>  | Firmicutes    | Clostridia   | 0                  | 0                   | 0                  | 0                   |
| <b>seq955</b>  | Firmicutes    | Clostridia   | 0                  | 0                   | 0                  | 0                   |
| <b>seq1337</b> | Firmicutes    | Clostridia   | 0                  | 0                   | 0                  | 0                   |
| <b>seq1352</b> | Firmicutes    | Clostridia   | 0                  | 0                   | 0                  | 0                   |
| <b>seq1372</b> | Firmicutes    | Clostridia   | 0                  | 0                   | 0                  | 0                   |
| <b>seq1377</b> | Firmicutes    | Clostridia   | 0                  | 0                   | 0                  | 0                   |
| <b>seq1446</b> | Firmicutes    | Clostridia   | 0                  | 0                   | 0                  | 0                   |
| <b>seq1605</b> | Firmicutes    | Clostridia   | 0                  | 0                   | 0                  | 0                   |
| <b>seq1663</b> | Firmicutes    | Clostridia   | 0                  | 0                   | 0                  | 0                   |
| <b>seq1664</b> | Firmicutes    | Clostridia   | 0                  | 0                   | 0                  | 0                   |
| <b>seq1725</b> | Firmicutes    | Clostridia   | 0                  | 0                   | 0                  | 0                   |
| <b>seq1742</b> | Firmicutes    | Clostridia   | 0                  | 0                   | 0                  | 0                   |
| <b>seq1776</b> | Firmicutes    | Clostridia   | 0                  | 0                   | 0                  | 0                   |
| <b>seq1777</b> | Firmicutes    | Clostridia   | 0                  | 0                   | 0                  | 0                   |
| <b>seq1821</b> | Firmicutes    | Clostridia   | 0                  | 0                   | 0                  | 0                   |
| <b>seq1822</b> | Firmicutes    | Clostridia   | 0                  | 0                   | 0                  | 0                   |
| <b>seq1850</b> | Firmicutes    | Clostridia   | 0                  | 0                   | 0                  | 0                   |
| <b>seq836</b>  | Firmicutes    | Clostridia   | 0                  | 0                   | 0                  | 0                   |
| <b>seq62</b>   | Firmicutes    | Clostridia   | 29                 | 853                 | 915                | 268                 |
| <b>seq175</b>  | Firmicutes    | Clostridia   | 0                  | 0                   | 0                  | 0                   |

Sequence Count Table

|                | <b>Phylum</b> | <b>Class</b> | <b>Subject4WK0</b> | <b>Subject4WK12</b> | <b>Subject5WK0</b> | <b>Subject5WK12</b> |
|----------------|---------------|--------------|--------------------|---------------------|--------------------|---------------------|
| <b>seq1453</b> | Firmicutes    | Bacilli      | 0                  | 0                   | 0                  | 0                   |
| <b>seq1574</b> | Firmicutes    | Bacilli      | 0                  | 0                   | 0                  | 0                   |
| <b>seq1638</b> | Firmicutes    | Bacilli      | 0                  | 0                   | 0                  | 0                   |
| <b>seq1640</b> | Firmicutes    | Bacilli      | 0                  | 0                   | 0                  | 0                   |
| <b>seq1887</b> | Firmicutes    | Bacilli      | 0                  | 0                   | 0                  | 0                   |
| <b>seq1342</b> | Firmicutes    | Bacilli      | 0                  | 0                   | 0                  | 0                   |
| <b>seq1757</b> | Firmicutes    | Bacilli      | 0                  | 0                   | 0                  | 0                   |
| <b>seq1817</b> | Firmicutes    | Bacilli      | 0                  | 0                   | 0                  | 0                   |
| <b>seq304</b>  | Firmicutes    | Clostridia   | 874                | 706                 | 0                  | 0                   |
| <b>seq632</b>  | Firmicutes    | Clostridia   | 0                  | 0                   | 0                  | 0                   |
| <b>seq1759</b> | Firmicutes    | Clostridia   | 0                  | 0                   | 0                  | 0                   |
| <b>seq514</b>  | Firmicutes    | Clostridia   | 33                 | 79                  | 0                  | 0                   |
| <b>seq658</b>  | Firmicutes    | Clostridia   | 3                  | 9                   | 0                  | 0                   |
| <b>seq955</b>  | Firmicutes    | Clostridia   | 0                  | 0                   | 0                  | 0                   |
| <b>seq1337</b> | Firmicutes    | Clostridia   | 9                  | 0                   | 0                  | 0                   |
| <b>seq1352</b> | Firmicutes    | Clostridia   | 0                  | 0                   | 0                  | 0                   |
| <b>seq1372</b> | Firmicutes    | Clostridia   | 9                  | 10                  | 0                  | 0                   |
| <b>seq1377</b> | Firmicutes    | Clostridia   | 0                  | 0                   | 0                  | 0                   |
| <b>seq1446</b> | Firmicutes    | Clostridia   | 18                 | 3                   | 0                  | 0                   |
| <b>seq1605</b> | Firmicutes    | Clostridia   | 0                  | 0                   | 0                  | 0                   |
| <b>seq1663</b> | Firmicutes    | Clostridia   | 0                  | 0                   | 0                  | 0                   |
| <b>seq1664</b> | Firmicutes    | Clostridia   | 0                  | 0                   | 0                  | 0                   |
| <b>seq1725</b> | Firmicutes    | Clostridia   | 0                  | 0                   | 0                  | 0                   |
| <b>seq1742</b> | Firmicutes    | Clostridia   | 0                  | 0                   | 0                  | 0                   |
| <b>seq1776</b> | Firmicutes    | Clostridia   | 0                  | 0                   | 0                  | 0                   |
| <b>seq1777</b> | Firmicutes    | Clostridia   | 0                  | 0                   | 0                  | 0                   |
| <b>seq1821</b> | Firmicutes    | Clostridia   | 0                  | 0                   | 0                  | 0                   |
| <b>seq1822</b> | Firmicutes    | Clostridia   | 0                  | 0                   | 0                  | 0                   |
| <b>seq1850</b> | Firmicutes    | Clostridia   | 0                  | 0                   | 0                  | 0                   |
| <b>seq836</b>  | Firmicutes    | Clostridia   | 0                  | 0                   | 0                  | 0                   |
| <b>seq62</b>   | Firmicutes    | Clostridia   | 154                | 223                 | 602                | 274                 |
| <b>seq175</b>  | Firmicutes    | Clostridia   | 0                  | 0                   | 0                  | 0                   |

Sequence Count Table

|                | <b>Phylum</b> | <b>Class</b> | <b>Subject6WK0</b> | <b>Subject6WK12</b> | <b>Subject18WK0</b> | <b>Subject18WK12</b> |
|----------------|---------------|--------------|--------------------|---------------------|---------------------|----------------------|
| <b>seq1453</b> | Firmicutes    | Bacilli      | 0                  | 0                   | 0                   | 0                    |
| <b>seq1574</b> | Firmicutes    | Bacilli      | 0                  | 0                   | 0                   | 0                    |
| <b>seq1638</b> | Firmicutes    | Bacilli      | 0                  | 0                   | 0                   | 0                    |
| <b>seq1640</b> | Firmicutes    | Bacilli      | 0                  | 0                   | 0                   | 0                    |
| <b>seq1887</b> | Firmicutes    | Bacilli      | 0                  | 0                   | 0                   | 0                    |
| <b>seq1342</b> | Firmicutes    | Bacilli      | 0                  | 0                   | 0                   | 0                    |
| <b>seq1757</b> | Firmicutes    | Bacilli      | 0                  | 0                   | 0                   | 0                    |
| <b>seq1817</b> | Firmicutes    | Bacilli      | 0                  | 0                   | 0                   | 0                    |
| <b>seq304</b>  | Firmicutes    | Clostridia   | 0                  | 0                   | 0                   | 0                    |
| <b>seq632</b>  | Firmicutes    | Clostridia   | 0                  | 0                   | 0                   | 0                    |
| <b>seq1759</b> | Firmicutes    | Clostridia   | 0                  | 0                   | 0                   | 0                    |
| <b>seq514</b>  | Firmicutes    | Clostridia   | 0                  | 0                   | 0                   | 0                    |
| <b>seq658</b>  | Firmicutes    | Clostridia   | 46                 | 0                   | 0                   | 0                    |
| <b>seq955</b>  | Firmicutes    | Clostridia   | 0                  | 0                   | 0                   | 0                    |
| <b>seq1337</b> | Firmicutes    | Clostridia   | 0                  | 0                   | 0                   | 0                    |
| <b>seq1352</b> | Firmicutes    | Clostridia   | 0                  | 0                   | 0                   | 0                    |
| <b>seq1372</b> | Firmicutes    | Clostridia   | 9                  | 17                  | 0                   | 0                    |
| <b>seq1377</b> | Firmicutes    | Clostridia   | 0                  | 0                   | 0                   | 0                    |
| <b>seq1446</b> | Firmicutes    | Clostridia   | 0                  | 0                   | 0                   | 0                    |
| <b>seq1605</b> | Firmicutes    | Clostridia   | 7                  | 12                  | 0                   | 0                    |
| <b>seq1663</b> | Firmicutes    | Clostridia   | 0                  | 0                   | 0                   | 0                    |
| <b>seq1664</b> | Firmicutes    | Clostridia   | 0                  | 0                   | 0                   | 0                    |
| <b>seq1725</b> | Firmicutes    | Clostridia   | 0                  | 4                   | 0                   | 0                    |
| <b>seq1742</b> | Firmicutes    | Clostridia   | 0                  | 0                   | 0                   | 0                    |
| <b>seq1776</b> | Firmicutes    | Clostridia   | 0                  | 0                   | 0                   | 0                    |
| <b>seq1777</b> | Firmicutes    | Clostridia   | 0                  | 0                   | 0                   | 0                    |
| <b>seq1821</b> | Firmicutes    | Clostridia   | 0                  | 0                   | 0                   | 0                    |
| <b>seq1822</b> | Firmicutes    | Clostridia   | 0                  | 0                   | 0                   | 0                    |
| <b>seq1850</b> | Firmicutes    | Clostridia   | 0                  | 0                   | 0                   | 0                    |
| <b>seq836</b>  | Firmicutes    | Clostridia   | 0                  | 0                   | 0                   | 0                    |
| <b>seq62</b>   | Firmicutes    | Clostridia   | 38                 | 100                 | 917                 | 629                  |
| <b>seq175</b>  | Firmicutes    | Clostridia   | 0                  | 0                   | 0                   | 0                    |

Sequence Count Table

|                | <b>Phylum</b> | <b>Class</b> | <b>Subject19WK0</b> | <b>Subject19WK12</b> | <b>Subject20WK0</b> | <b>Subject20WK12</b> |
|----------------|---------------|--------------|---------------------|----------------------|---------------------|----------------------|
| <b>seq1453</b> | Firmicutes    | Bacilli      | 0                   | 0                    | 0                   | 0                    |
| <b>seq1574</b> | Firmicutes    | Bacilli      | 0                   | 0                    | 0                   | 0                    |
| <b>seq1638</b> | Firmicutes    | Bacilli      | 0                   | 0                    | 0                   | 0                    |
| <b>seq1640</b> | Firmicutes    | Bacilli      | 0                   | 0                    | 0                   | 0                    |
| <b>seq1887</b> | Firmicutes    | Bacilli      | 0                   | 0                    | 0                   | 0                    |
| <b>seq1342</b> | Firmicutes    | Bacilli      | 0                   | 0                    | 0                   | 0                    |
| <b>seq1757</b> | Firmicutes    | Bacilli      | 0                   | 0                    | 0                   | 0                    |
| <b>seq1817</b> | Firmicutes    | Bacilli      | 0                   | 0                    | 0                   | 0                    |
| <b>seq304</b>  | Firmicutes    | Clostridia   | 0                   | 0                    | 0                   | 0                    |
| <b>seq632</b>  | Firmicutes    | Clostridia   | 0                   | 0                    | 231                 | 262                  |
| <b>seq1759</b> | Firmicutes    | Clostridia   | 0                   | 0                    | 0                   | 0                    |
| <b>seq514</b>  | Firmicutes    | Clostridia   | 0                   | 0                    | 0                   | 0                    |
| <b>seq658</b>  | Firmicutes    | Clostridia   | 0                   | 0                    | 0                   | 0                    |
| <b>seq955</b>  | Firmicutes    | Clostridia   | 92                  | 69                   | 0                   | 0                    |
| <b>seq1337</b> | Firmicutes    | Clostridia   | 0                   | 0                    | 0                   | 0                    |
| <b>seq1352</b> | Firmicutes    | Clostridia   | 0                   | 0                    | 0                   | 0                    |
| <b>seq1372</b> | Firmicutes    | Clostridia   | 0                   | 0                    | 0                   | 0                    |
| <b>seq1377</b> | Firmicutes    | Clostridia   | 0                   | 0                    | 0                   | 0                    |
| <b>seq1446</b> | Firmicutes    | Clostridia   | 0                   | 0                    | 0                   | 0                    |
| <b>seq1605</b> | Firmicutes    | Clostridia   | 0                   | 0                    | 0                   | 0                    |
| <b>seq1663</b> | Firmicutes    | Clostridia   | 0                   | 0                    | 0                   | 0                    |
| <b>seq1664</b> | Firmicutes    | Clostridia   | 0                   | 0                    | 0                   | 0                    |
| <b>seq1725</b> | Firmicutes    | Clostridia   | 0                   | 0                    | 0                   | 0                    |
| <b>seq1742</b> | Firmicutes    | Clostridia   | 0                   | 0                    | 0                   | 0                    |
| <b>seq1776</b> | Firmicutes    | Clostridia   | 0                   | 0                    | 0                   | 0                    |
| <b>seq1777</b> | Firmicutes    | Clostridia   | 0                   | 0                    | 0                   | 0                    |
| <b>seq1821</b> | Firmicutes    | Clostridia   | 0                   | 0                    | 0                   | 0                    |
| <b>seq1822</b> | Firmicutes    | Clostridia   | 0                   | 0                    | 0                   | 0                    |
| <b>seq1850</b> | Firmicutes    | Clostridia   | 0                   | 0                    | 5                   | 0                    |
| <b>seq836</b>  | Firmicutes    | Clostridia   | 0                   | 0                    | 0                   | 0                    |
| <b>seq62</b>   | Firmicutes    | Clostridia   | 203                 | 657                  | 129                 | 95                   |
| <b>seq175</b>  | Firmicutes    | Clostridia   | 0                   | 0                    | 0                   | 0                    |

Sequence Count Table

|                | <b>Phylum</b> | <b>Class</b> | <b>Subject7WK0</b> | <b>Subject7WK12</b> | <b>Subject21WK0</b> | <b>Subject21WK12</b> |
|----------------|---------------|--------------|--------------------|---------------------|---------------------|----------------------|
| <b>seq1453</b> | Firmicutes    | Bacilli      | 0                  | 0                   | 0                   | 0                    |
| <b>seq1574</b> | Firmicutes    | Bacilli      | 0                  | 0                   | 0                   | 0                    |
| <b>seq1638</b> | Firmicutes    | Bacilli      | 0                  | 0                   | 0                   | 0                    |
| <b>seq1640</b> | Firmicutes    | Bacilli      | 0                  | 0                   | 0                   | 0                    |
| <b>seq1887</b> | Firmicutes    | Bacilli      | 0                  | 0                   | 0                   | 0                    |
| <b>seq1342</b> | Firmicutes    | Bacilli      | 0                  | 0                   | 0                   | 0                    |
| <b>seq1757</b> | Firmicutes    | Bacilli      | 0                  | 0                   | 0                   | 0                    |
| <b>seq1817</b> | Firmicutes    | Bacilli      | 0                  | 0                   | 0                   | 0                    |
| <b>seq304</b>  | Firmicutes    | Clostridia   | 0                  | 0                   | 0                   | 0                    |
| <b>seq632</b>  | Firmicutes    | Clostridia   | 0                  | 0                   | 0                   | 0                    |
| <b>seq1759</b> | Firmicutes    | Clostridia   | 0                  | 0                   | 0                   | 0                    |
| <b>seq514</b>  | Firmicutes    | Clostridia   | 0                  | 0                   | 0                   | 0                    |
| <b>seq658</b>  | Firmicutes    | Clostridia   | 0                  | 0                   | 0                   | 0                    |
| <b>seq955</b>  | Firmicutes    | Clostridia   | 0                  | 0                   | 0                   | 0                    |
| <b>seq1337</b> | Firmicutes    | Clostridia   | 0                  | 0                   | 0                   | 0                    |
| <b>seq1352</b> | Firmicutes    | Clostridia   | 0                  | 0                   | 0                   | 0                    |
| <b>seq1372</b> | Firmicutes    | Clostridia   | 0                  | 0                   | 0                   | 0                    |
| <b>seq1377</b> | Firmicutes    | Clostridia   | 0                  | 0                   | 0                   | 0                    |
| <b>seq1446</b> | Firmicutes    | Clostridia   | 0                  | 0                   | 0                   | 0                    |
| <b>seq1605</b> | Firmicutes    | Clostridia   | 0                  | 0                   | 0                   | 0                    |
| <b>seq1663</b> | Firmicutes    | Clostridia   | 0                  | 0                   | 0                   | 0                    |
| <b>seq1664</b> | Firmicutes    | Clostridia   | 0                  | 0                   | 0                   | 0                    |
| <b>seq1725</b> | Firmicutes    | Clostridia   | 0                  | 0                   | 0                   | 0                    |
| <b>seq1742</b> | Firmicutes    | Clostridia   | 0                  | 0                   | 0                   | 0                    |
| <b>seq1776</b> | Firmicutes    | Clostridia   | 0                  | 0                   | 0                   | 0                    |
| <b>seq1777</b> | Firmicutes    | Clostridia   | 0                  | 0                   | 0                   | 0                    |
| <b>seq1821</b> | Firmicutes    | Clostridia   | 0                  | 0                   | 0                   | 0                    |
| <b>seq1822</b> | Firmicutes    | Clostridia   | 0                  | 0                   | 0                   | 0                    |
| <b>seq1850</b> | Firmicutes    | Clostridia   | 0                  | 0                   | 0                   | 0                    |
| <b>seq836</b>  | Firmicutes    | Clostridia   | 0                  | 0                   | 35                  | 200                  |
| <b>seq62</b>   | Firmicutes    | Clostridia   | 110                | 1370                | 867                 | 1337                 |
| <b>seq175</b>  | Firmicutes    | Clostridia   | 0                  | 0                   | 0                   | 0                    |



Sequence Count Table

|                | <b>Phylum</b> | <b>Class</b> | <b>Subject8WK0</b> | <b>Subject8WK12</b> | <b>Subject9WK0</b> | <b>Subject9WK12</b> |
|----------------|---------------|--------------|--------------------|---------------------|--------------------|---------------------|
| <b>seq1453</b> | Firmicutes    | Bacilli      | 0                  | 0                   | 0                  | 0                   |
| <b>seq1574</b> | Firmicutes    | Bacilli      | 0                  | 0                   | 0                  | 0                   |
| <b>seq1638</b> | Firmicutes    | Bacilli      | 0                  | 0                   | 0                  | 0                   |
| <b>seq1640</b> | Firmicutes    | Bacilli      | 0                  | 0                   | 0                  | 0                   |
| <b>seq1887</b> | Firmicutes    | Bacilli      | 0                  | 0                   | 0                  | 0                   |
| <b>seq1342</b> | Firmicutes    | Bacilli      | 0                  | 0                   | 0                  | 0                   |
| <b>seq1757</b> | Firmicutes    | Bacilli      | 0                  | 0                   | 0                  | 0                   |
| <b>seq1817</b> | Firmicutes    | Bacilli      | 0                  | 0                   | 0                  | 0                   |
| <b>seq304</b>  | Firmicutes    | Clostridia   | 0                  | 0                   | 0                  | 0                   |
| <b>seq632</b>  | Firmicutes    | Clostridia   | 0                  | 0                   | 0                  | 0                   |
| <b>seq1759</b> | Firmicutes    | Clostridia   | 0                  | 0                   | 0                  | 0                   |
| <b>seq514</b>  | Firmicutes    | Clostridia   | 62                 | 21                  | 0                  | 0                   |
| <b>seq658</b>  | Firmicutes    | Clostridia   | 0                  | 0                   | 0                  | 0                   |
| <b>seq955</b>  | Firmicutes    | Clostridia   | 0                  | 0                   | 0                  | 0                   |
| <b>seq1337</b> | Firmicutes    | Clostridia   | 0                  | 0                   | 0                  | 0                   |
| <b>seq1352</b> | Firmicutes    | Clostridia   | 0                  | 0                   | 0                  | 0                   |
| <b>seq1372</b> | Firmicutes    | Clostridia   | 0                  | 0                   | 0                  | 0                   |
| <b>seq1377</b> | Firmicutes    | Clostridia   | 0                  | 0                   | 0                  | 0                   |
| <b>seq1446</b> | Firmicutes    | Clostridia   | 0                  | 0                   | 0                  | 0                   |
| <b>seq1605</b> | Firmicutes    | Clostridia   | 0                  | 0                   | 0                  | 0                   |
| <b>seq1663</b> | Firmicutes    | Clostridia   | 0                  | 0                   | 0                  | 0                   |
| <b>seq1664</b> | Firmicutes    | Clostridia   | 0                  | 0                   | 0                  | 0                   |
| <b>seq1725</b> | Firmicutes    | Clostridia   | 0                  | 0                   | 0                  | 0                   |
| <b>seq1742</b> | Firmicutes    | Clostridia   | 0                  | 0                   | 0                  | 0                   |
| <b>seq1776</b> | Firmicutes    | Clostridia   | 0                  | 0                   | 0                  | 0                   |
| <b>seq1777</b> | Firmicutes    | Clostridia   | 0                  | 0                   | 0                  | 0                   |
| <b>seq1821</b> | Firmicutes    | Clostridia   | 0                  | 0                   | 0                  | 0                   |
| <b>seq1822</b> | Firmicutes    | Clostridia   | 0                  | 0                   | 0                  | 0                   |
| <b>seq1850</b> | Firmicutes    | Clostridia   | 0                  | 0                   | 0                  | 0                   |
| <b>seq836</b>  | Firmicutes    | Clostridia   | 0                  | 0                   | 0                  | 0                   |
| <b>seq62</b>   | Firmicutes    | Clostridia   | 408                | 34                  | 5                  | 24                  |
| <b>seq175</b>  | Firmicutes    | Clostridia   | 0                  | 0                   | 0                  | 0                   |

Sequence Count Table

|                | <b>Phylum</b> | <b>Class</b> | <b>Subject10WK0</b> | <b>Subject10WK12</b> | <b>Subject22WK0</b> | <b>Subject22WK12</b> |
|----------------|---------------|--------------|---------------------|----------------------|---------------------|----------------------|
| <b>seq1453</b> | Firmicutes    | Bacilli      | 0                   | 0                    | 0                   | 0                    |
| <b>seq1574</b> | Firmicutes    | Bacilli      | 0                   | 0                    | 0                   | 0                    |
| <b>seq1638</b> | Firmicutes    | Bacilli      | 0                   | 0                    | 0                   | 0                    |
| <b>seq1640</b> | Firmicutes    | Bacilli      | 0                   | 0                    | 0                   | 0                    |
| <b>seq1887</b> | Firmicutes    | Bacilli      | 3                   | 0                    | 0                   | 0                    |
| <b>seq1342</b> | Firmicutes    | Bacilli      | 0                   | 0                    | 0                   | 0                    |
| <b>seq1757</b> | Firmicutes    | Bacilli      | 0                   | 0                    | 0                   | 0                    |
| <b>seq1817</b> | Firmicutes    | Bacilli      | 0                   | 0                    | 0                   | 0                    |
| <b>seq304</b>  | Firmicutes    | Clostridia   | 0                   | 0                    | 0                   | 0                    |
| <b>seq632</b>  | Firmicutes    | Clostridia   | 0                   | 0                    | 0                   | 0                    |
| <b>seq1759</b> | Firmicutes    | Clostridia   | 0                   | 0                    | 0                   | 0                    |
| <b>seq514</b>  | Firmicutes    | Clostridia   | 0                   | 0                    | 0                   | 0                    |
| <b>seq658</b>  | Firmicutes    | Clostridia   | 0                   | 0                    | 0                   | 0                    |
| <b>seq955</b>  | Firmicutes    | Clostridia   | 0                   | 0                    | 0                   | 0                    |
| <b>seq1337</b> | Firmicutes    | Clostridia   | 0                   | 0                    | 13                  | 0                    |
| <b>seq1352</b> | Firmicutes    | Clostridia   | 0                   | 0                    | 0                   | 0                    |
| <b>seq1372</b> | Firmicutes    | Clostridia   | 0                   | 0                    | 0                   | 0                    |
| <b>seq1377</b> | Firmicutes    | Clostridia   | 0                   | 0                    | 0                   | 0                    |
| <b>seq1446</b> | Firmicutes    | Clostridia   | 0                   | 0                    | 0                   | 0                    |
| <b>seq1605</b> | Firmicutes    | Clostridia   | 0                   | 0                    | 0                   | 0                    |
| <b>seq1663</b> | Firmicutes    | Clostridia   | 0                   | 0                    | 15                  | 0                    |
| <b>seq1664</b> | Firmicutes    | Clostridia   | 0                   | 0                    | 8                   | 7                    |
| <b>seq1725</b> | Firmicutes    | Clostridia   | 0                   | 0                    | 7                   | 0                    |
| <b>seq1742</b> | Firmicutes    | Clostridia   | 0                   | 0                    | 0                   | 0                    |
| <b>seq1776</b> | Firmicutes    | Clostridia   | 0                   | 0                    | 0                   | 9                    |
| <b>seq1777</b> | Firmicutes    | Clostridia   | 0                   | 0                    | 0                   | 5                    |
| <b>seq1821</b> | Firmicutes    | Clostridia   | 0                   | 0                    | 0                   | 0                    |
| <b>seq1822</b> | Firmicutes    | Clostridia   | 0                   | 0                    | 0                   | 0                    |
| <b>seq1850</b> | Firmicutes    | Clostridia   | 0                   | 0                    | 0                   | 0                    |
| <b>seq836</b>  | Firmicutes    | Clostridia   | 0                   | 0                    | 0                   | 0                    |
| <b>seq62</b>   | Firmicutes    | Clostridia   | 0                   | 0                    | 139                 | 106                  |
| <b>seq175</b>  | Firmicutes    | Clostridia   | 0                   | 0                    | 0                   | 0                    |

Sequence Count Table

|                | <b>Phylum</b> | <b>Class</b> | <b>Subject23WK0</b> | <b>Subject23WK12</b> | <b>Subject24WK0</b> | <b>Subject24WK12</b> |
|----------------|---------------|--------------|---------------------|----------------------|---------------------|----------------------|
| <b>seq1453</b> | Firmicutes    | Bacilli      | 0                   | 0                    | 0                   | 0                    |
| <b>seq1574</b> | Firmicutes    | Bacilli      | 0                   | 0                    | 0                   | 0                    |
| <b>seq1638</b> | Firmicutes    | Bacilli      | 0                   | 17                   | 0                   | 0                    |
| <b>seq1640</b> | Firmicutes    | Bacilli      | 0                   | 0                    | 0                   | 0                    |
| <b>seq1887</b> | Firmicutes    | Bacilli      | 0                   | 0                    | 0                   | 0                    |
| <b>seq1342</b> | Firmicutes    | Bacilli      | 0                   | 0                    | 0                   | 0                    |
| <b>seq1757</b> | Firmicutes    | Bacilli      | 0                   | 10                   | 0                   | 0                    |
| <b>seq1817</b> | Firmicutes    | Bacilli      | 7                   | 0                    | 0                   | 0                    |
| <b>seq304</b>  | Firmicutes    | Clostridia   | 0                   | 0                    | 0                   | 0                    |
| <b>seq632</b>  | Firmicutes    | Clostridia   | 0                   | 0                    | 0                   | 0                    |
| <b>seq1759</b> | Firmicutes    | Clostridia   | 0                   | 0                    | 0                   | 0                    |
| <b>seq514</b>  | Firmicutes    | Clostridia   | 0                   | 0                    | 0                   | 0                    |
| <b>seq658</b>  | Firmicutes    | Clostridia   | 0                   | 0                    | 196                 | 181                  |
| <b>seq955</b>  | Firmicutes    | Clostridia   | 0                   | 0                    | 0                   | 0                    |
| <b>seq1337</b> | Firmicutes    | Clostridia   | 0                   | 10                   | 0                   | 0                    |
| <b>seq1352</b> | Firmicutes    | Clostridia   | 17                  | 23                   | 0                   | 0                    |
| <b>seq1372</b> | Firmicutes    | Clostridia   | 0                   | 0                    | 0                   | 0                    |
| <b>seq1377</b> | Firmicutes    | Clostridia   | 0                   | 0                    | 0                   | 15                   |
| <b>seq1446</b> | Firmicutes    | Clostridia   | 0                   | 0                    | 0                   | 0                    |
| <b>seq1605</b> | Firmicutes    | Clostridia   | 0                   | 0                    | 0                   | 0                    |
| <b>seq1663</b> | Firmicutes    | Clostridia   | 0                   | 0                    | 0                   | 0                    |
| <b>seq1664</b> | Firmicutes    | Clostridia   | 0                   | 0                    | 0                   | 0                    |
| <b>seq1725</b> | Firmicutes    | Clostridia   | 0                   | 0                    | 0                   | 0                    |
| <b>seq1742</b> | Firmicutes    | Clostridia   | 0                   | 0                    | 0                   | 0                    |
| <b>seq1776</b> | Firmicutes    | Clostridia   | 0                   | 0                    | 0                   | 0                    |
| <b>seq1777</b> | Firmicutes    | Clostridia   | 0                   | 0                    | 0                   | 0                    |
| <b>seq1821</b> | Firmicutes    | Clostridia   | 0                   | 0                    | 0                   | 0                    |
| <b>seq1822</b> | Firmicutes    | Clostridia   | 0                   | 0                    | 0                   | 0                    |
| <b>seq1850</b> | Firmicutes    | Clostridia   | 0                   | 0                    | 0                   | 0                    |
| <b>seq836</b>  | Firmicutes    | Clostridia   | 0                   | 0                    | 0                   | 0                    |
| <b>seq62</b>   | Firmicutes    | Clostridia   | 917                 | 1372                 | 1767                | 1016                 |
| <b>seq175</b>  | Firmicutes    | Clostridia   | 0                   | 0                    | 0                   | 0                    |

Sequence Count Table

|                | <b>Phylum</b> | <b>Class</b> | <b>Subject11WK0</b> | <b>Subject11WK12</b> | <b>Subject12WK0</b> | <b>Subject12WK12</b> |
|----------------|---------------|--------------|---------------------|----------------------|---------------------|----------------------|
| <b>seq1453</b> | Firmicutes    | Bacilli      | 0                   | 0                    | 0                   | 0                    |
| <b>seq1574</b> | Firmicutes    | Bacilli      | 0                   | 0                    | 0                   | 0                    |
| <b>seq1638</b> | Firmicutes    | Bacilli      | 0                   | 0                    | 0                   | 0                    |
| <b>seq1640</b> | Firmicutes    | Bacilli      | 0                   | 0                    | 0                   | 0                    |
| <b>seq1887</b> | Firmicutes    | Bacilli      | 0                   | 0                    | 0                   | 0                    |
| <b>seq1342</b> | Firmicutes    | Bacilli      | 0                   | 0                    | 0                   | 0                    |
| <b>seq1757</b> | Firmicutes    | Bacilli      | 0                   | 0                    | 0                   | 0                    |
| <b>seq1817</b> | Firmicutes    | Bacilli      | 0                   | 0                    | 0                   | 0                    |
| <b>seq304</b>  | Firmicutes    | Clostridia   | 0                   | 0                    | 0                   | 0                    |
| <b>seq632</b>  | Firmicutes    | Clostridia   | 0                   | 0                    | 0                   | 0                    |
| <b>seq1759</b> | Firmicutes    | Clostridia   | 0                   | 0                    | 0                   | 0                    |
| <b>seq514</b>  | Firmicutes    | Clostridia   | 0                   | 0                    | 0                   | 0                    |
| <b>seq658</b>  | Firmicutes    | Clostridia   | 0                   | 0                    | 0                   | 0                    |
| <b>seq955</b>  | Firmicutes    | Clostridia   | 0                   | 0                    | 0                   | 0                    |
| <b>seq1337</b> | Firmicutes    | Clostridia   | 0                   | 0                    | 0                   | 0                    |
| <b>seq1352</b> | Firmicutes    | Clostridia   | 0                   | 0                    | 0                   | 0                    |
| <b>seq1372</b> | Firmicutes    | Clostridia   | 0                   | 0                    | 0                   | 0                    |
| <b>seq1377</b> | Firmicutes    | Clostridia   | 0                   | 0                    | 0                   | 0                    |
| <b>seq1446</b> | Firmicutes    | Clostridia   | 0                   | 0                    | 0                   | 0                    |
| <b>seq1605</b> | Firmicutes    | Clostridia   | 0                   | 0                    | 0                   | 0                    |
| <b>seq1663</b> | Firmicutes    | Clostridia   | 0                   | 0                    | 0                   | 0                    |
| <b>seq1664</b> | Firmicutes    | Clostridia   | 0                   | 0                    | 0                   | 0                    |
| <b>seq1725</b> | Firmicutes    | Clostridia   | 0                   | 0                    | 0                   | 0                    |
| <b>seq1742</b> | Firmicutes    | Clostridia   | 0                   | 0                    | 0                   | 0                    |
| <b>seq1776</b> | Firmicutes    | Clostridia   | 0                   | 0                    | 0                   | 0                    |
| <b>seq1777</b> | Firmicutes    | Clostridia   | 0                   | 0                    | 0                   | 0                    |
| <b>seq1821</b> | Firmicutes    | Clostridia   | 0                   | 0                    | 0                   | 0                    |
| <b>seq1822</b> | Firmicutes    | Clostridia   | 0                   | 0                    | 0                   | 0                    |
| <b>seq1850</b> | Firmicutes    | Clostridia   | 0                   | 0                    | 0                   | 0                    |
| <b>seq836</b>  | Firmicutes    | Clostridia   | 0                   | 0                    | 0                   | 0                    |
| <b>seq62</b>   | Firmicutes    | Clostridia   | 33                  | 0                    | 0                   | 108                  |
| <b>seq175</b>  | Firmicutes    | Clostridia   | 0                   | 0                    | 0                   | 0                    |

Sequence Count Table

|                | <b>Phylum</b> | <b>Class</b> | <b>Subject25WK0</b> | <b>Subject25WK12</b> | <b>Subject38WK0</b> | <b>Subject38WK12</b> |
|----------------|---------------|--------------|---------------------|----------------------|---------------------|----------------------|
| <b>seq1453</b> | Firmicutes    | Bacilli      | 0                   | 0                    | 0                   | 0                    |
| <b>seq1574</b> | Firmicutes    | Bacilli      | 0                   | 0                    | 0                   | 0                    |
| <b>seq1638</b> | Firmicutes    | Bacilli      | 0                   | 0                    | 0                   | 0                    |
| <b>seq1640</b> | Firmicutes    | Bacilli      | 0                   | 0                    | 0                   | 0                    |
| <b>seq1887</b> | Firmicutes    | Bacilli      | 0                   | 0                    | 0                   | 0                    |
| <b>seq1342</b> | Firmicutes    | Bacilli      | 0                   | 0                    | 0                   | 0                    |
| <b>seq1757</b> | Firmicutes    | Bacilli      | 0                   | 0                    | 0                   | 0                    |
| <b>seq1817</b> | Firmicutes    | Bacilli      | 0                   | 0                    | 0                   | 0                    |
| <b>seq304</b>  | Firmicutes    | Clostridia   | 0                   | 0                    | 0                   | 0                    |
| <b>seq632</b>  | Firmicutes    | Clostridia   | 0                   | 0                    | 0                   | 0                    |
| <b>seq1759</b> | Firmicutes    | Clostridia   | 0                   | 10                   | 0                   | 0                    |
| <b>seq514</b>  | Firmicutes    | Clostridia   | 83                  | 0                    | 0                   | 0                    |
| <b>seq658</b>  | Firmicutes    | Clostridia   | 0                   | 0                    | 0                   | 0                    |
| <b>seq955</b>  | Firmicutes    | Clostridia   | 0                   | 0                    | 0                   | 0                    |
| <b>seq1337</b> | Firmicutes    | Clostridia   | 10                  | 0                    | 0                   | 0                    |
| <b>seq1352</b> | Firmicutes    | Clostridia   | 0                   | 0                    | 0                   | 0                    |
| <b>seq1372</b> | Firmicutes    | Clostridia   | 0                   | 0                    | 0                   | 0                    |
| <b>seq1377</b> | Firmicutes    | Clostridia   | 0                   | 0                    | 0                   | 0                    |
| <b>seq1446</b> | Firmicutes    | Clostridia   | 0                   | 0                    | 0                   | 0                    |
| <b>seq1605</b> | Firmicutes    | Clostridia   | 0                   | 0                    | 0                   | 0                    |
| <b>seq1663</b> | Firmicutes    | Clostridia   | 0                   | 0                    | 0                   | 0                    |
| <b>seq1664</b> | Firmicutes    | Clostridia   | 0                   | 0                    | 0                   | 0                    |
| <b>seq1725</b> | Firmicutes    | Clostridia   | 0                   | 0                    | 0                   | 0                    |
| <b>seq1742</b> | Firmicutes    | Clostridia   | 0                   | 0                    | 0                   | 0                    |
| <b>seq1776</b> | Firmicutes    | Clostridia   | 0                   | 0                    | 0                   | 0                    |
| <b>seq1777</b> | Firmicutes    | Clostridia   | 0                   | 0                    | 0                   | 0                    |
| <b>seq1821</b> | Firmicutes    | Clostridia   | 0                   | 0                    | 0                   | 0                    |
| <b>seq1822</b> | Firmicutes    | Clostridia   | 0                   | 0                    | 0                   | 0                    |
| <b>seq1850</b> | Firmicutes    | Clostridia   | 0                   | 0                    | 0                   | 0                    |
| <b>seq836</b>  | Firmicutes    | Clostridia   | 0                   | 0                    | 0                   | 0                    |
| <b>seq62</b>   | Firmicutes    | Clostridia   | 31                  | 15                   | 0                   | 0                    |
| <b>seq175</b>  | Firmicutes    | Clostridia   | 0                   | 0                    | 0                   | 0                    |

Sequence Count Table

|                | <b>Phylum</b> | <b>Class</b> | <b>Subject31WK0</b> | <b>Subject31WK12</b> | <b>Subject32WK0</b> | <b>Subject32WK12</b> |
|----------------|---------------|--------------|---------------------|----------------------|---------------------|----------------------|
| <b>seq1453</b> | Firmicutes    | Bacilli      | 0                   | 0                    | 0                   | 0                    |
| <b>seq1574</b> | Firmicutes    | Bacilli      | 0                   | 0                    | 0                   | 0                    |
| <b>seq1638</b> | Firmicutes    | Bacilli      | 0                   | 0                    | 0                   | 0                    |
| <b>seq1640</b> | Firmicutes    | Bacilli      | 0                   | 0                    | 0                   | 0                    |
| <b>seq1887</b> | Firmicutes    | Bacilli      | 0                   | 0                    | 0                   | 0                    |
| <b>seq1342</b> | Firmicutes    | Bacilli      | 0                   | 0                    | 0                   | 0                    |
| <b>seq1757</b> | Firmicutes    | Bacilli      | 0                   | 0                    | 0                   | 0                    |
| <b>seq1817</b> | Firmicutes    | Bacilli      | 0                   | 0                    | 0                   | 0                    |
| <b>seq304</b>  | Firmicutes    | Clostridia   | 0                   | 0                    | 0                   | 0                    |
| <b>seq632</b>  | Firmicutes    | Clostridia   | 0                   | 0                    | 0                   | 0                    |
| <b>seq1759</b> | Firmicutes    | Clostridia   | 0                   | 0                    | 0                   | 0                    |
| <b>seq514</b>  | Firmicutes    | Clostridia   | 0                   | 0                    | 0                   | 0                    |
| <b>seq658</b>  | Firmicutes    | Clostridia   | 0                   | 0                    | 0                   | 0                    |
| <b>seq955</b>  | Firmicutes    | Clostridia   | 0                   | 0                    | 0                   | 0                    |
| <b>seq1337</b> | Firmicutes    | Clostridia   | 0                   | 0                    | 0                   | 0                    |
| <b>seq1352</b> | Firmicutes    | Clostridia   | 0                   | 0                    | 0                   | 0                    |
| <b>seq1372</b> | Firmicutes    | Clostridia   | 0                   | 0                    | 0                   | 0                    |
| <b>seq1377</b> | Firmicutes    | Clostridia   | 0                   | 0                    | 0                   | 0                    |
| <b>seq1446</b> | Firmicutes    | Clostridia   | 0                   | 0                    | 0                   | 0                    |
| <b>seq1605</b> | Firmicutes    | Clostridia   | 0                   | 0                    | 0                   | 0                    |
| <b>seq1663</b> | Firmicutes    | Clostridia   | 0                   | 0                    | 0                   | 0                    |
| <b>seq1664</b> | Firmicutes    | Clostridia   | 0                   | 0                    | 0                   | 0                    |
| <b>seq1725</b> | Firmicutes    | Clostridia   | 0                   | 0                    | 0                   | 0                    |
| <b>seq1742</b> | Firmicutes    | Clostridia   | 0                   | 0                    | 0                   | 0                    |
| <b>seq1776</b> | Firmicutes    | Clostridia   | 0                   | 0                    | 0                   | 0                    |
| <b>seq1777</b> | Firmicutes    | Clostridia   | 0                   | 0                    | 0                   | 0                    |
| <b>seq1821</b> | Firmicutes    | Clostridia   | 0                   | 0                    | 0                   | 0                    |
| <b>seq1822</b> | Firmicutes    | Clostridia   | 0                   | 0                    | 0                   | 0                    |
| <b>seq1850</b> | Firmicutes    | Clostridia   | 0                   | 0                    | 0                   | 0                    |
| <b>seq836</b>  | Firmicutes    | Clostridia   | 0                   | 0                    | 0                   | 0                    |
| <b>seq62</b>   | Firmicutes    | Clostridia   | 0                   | 0                    | 0                   | 0                    |
| <b>seq175</b>  | Firmicutes    | Clostridia   | 0                   | 0                    | 0                   | 0                    |

Sequence Count Table

|                | <b>Phylum</b> | <b>Class</b> | <b>Subject13WK0</b> | <b>Subject13WK12</b> | <b>Subject39WK0</b> | <b>Subject39WK12</b> |
|----------------|---------------|--------------|---------------------|----------------------|---------------------|----------------------|
| <b>seq1453</b> | Firmicutes    | Bacilli      | 0                   | 0                    | 0                   | 0                    |
| <b>seq1574</b> | Firmicutes    | Bacilli      | 0                   | 0                    | 0                   | 0                    |
| <b>seq1638</b> | Firmicutes    | Bacilli      | 0                   | 0                    | 0                   | 0                    |
| <b>seq1640</b> | Firmicutes    | Bacilli      | 0                   | 0                    | 0                   | 0                    |
| <b>seq1887</b> | Firmicutes    | Bacilli      | 0                   | 0                    | 0                   | 0                    |
| <b>seq1342</b> | Firmicutes    | Bacilli      | 0                   | 0                    | 0                   | 0                    |
| <b>seq1757</b> | Firmicutes    | Bacilli      | 0                   | 0                    | 0                   | 0                    |
| <b>seq1817</b> | Firmicutes    | Bacilli      | 0                   | 0                    | 0                   | 0                    |
| <b>seq304</b>  | Firmicutes    | Clostridia   | 0                   | 0                    | 0                   | 0                    |
| <b>seq632</b>  | Firmicutes    | Clostridia   | 0                   | 0                    | 0                   | 0                    |
| <b>seq1759</b> | Firmicutes    | Clostridia   | 0                   | 0                    | 0                   | 0                    |
| <b>seq514</b>  | Firmicutes    | Clostridia   | 119                 | 27                   | 0                   | 0                    |
| <b>seq658</b>  | Firmicutes    | Clostridia   | 0                   | 9                    | 0                   | 0                    |
| <b>seq955</b>  | Firmicutes    | Clostridia   | 0                   | 0                    | 0                   | 0                    |
| <b>seq1337</b> | Firmicutes    | Clostridia   | 0                   | 0                    | 0                   | 0                    |
| <b>seq1352</b> | Firmicutes    | Clostridia   | 8                   | 0                    | 0                   | 0                    |
| <b>seq1372</b> | Firmicutes    | Clostridia   | 0                   | 0                    | 0                   | 0                    |
| <b>seq1377</b> | Firmicutes    | Clostridia   | 0                   | 8                    | 0                   | 0                    |
| <b>seq1446</b> | Firmicutes    | Clostridia   | 0                   | 6                    | 0                   | 0                    |
| <b>seq1605</b> | Firmicutes    | Clostridia   | 0                   | 0                    | 0                   | 0                    |
| <b>seq1663</b> | Firmicutes    | Clostridia   | 0                   | 0                    | 0                   | 0                    |
| <b>seq1664</b> | Firmicutes    | Clostridia   | 0                   | 0                    | 0                   | 0                    |
| <b>seq1725</b> | Firmicutes    | Clostridia   | 0                   | 0                    | 0                   | 0                    |
| <b>seq1742</b> | Firmicutes    | Clostridia   | 0                   | 0                    | 0                   | 0                    |
| <b>seq1776</b> | Firmicutes    | Clostridia   | 0                   | 0                    | 0                   | 0                    |
| <b>seq1777</b> | Firmicutes    | Clostridia   | 4                   | 0                    | 0                   | 0                    |
| <b>seq1821</b> | Firmicutes    | Clostridia   | 7                   | 0                    | 0                   | 0                    |
| <b>seq1822</b> | Firmicutes    | Clostridia   | 7                   | 0                    | 0                   | 0                    |
| <b>seq1850</b> | Firmicutes    | Clostridia   | 0                   | 0                    | 0                   | 0                    |
| <b>seq836</b>  | Firmicutes    | Clostridia   | 0                   | 0                    | 0                   | 0                    |
| <b>seq62</b>   | Firmicutes    | Clostridia   | 63                  | 0                    | 0                   | 36                   |
| <b>seq175</b>  | Firmicutes    | Clostridia   | 0                   | 0                    | 0                   | 0                    |

Sequence Count Table

|                | <b>Phylum</b> | <b>Class</b> | <b>Subject26WK0</b> | <b>Subject26WK12</b> | <b>Subject14WK0</b> | <b>Subject14WK12</b> |
|----------------|---------------|--------------|---------------------|----------------------|---------------------|----------------------|
| <b>seq1453</b> | Firmicutes    | Bacilli      | 0                   | 0                    | 0                   | 0                    |
| <b>seq1574</b> | Firmicutes    | Bacilli      | 22                  | 0                    | 0                   | 0                    |
| <b>seq1638</b> | Firmicutes    | Bacilli      | 0                   | 0                    | 0                   | 0                    |
| <b>seq1640</b> | Firmicutes    | Bacilli      | 0                   | 0                    | 0                   | 0                    |
| <b>seq1887</b> | Firmicutes    | Bacilli      | 0                   | 0                    | 0                   | 0                    |
| <b>seq1342</b> | Firmicutes    | Bacilli      | 0                   | 0                    | 0                   | 0                    |
| <b>seq1757</b> | Firmicutes    | Bacilli      | 0                   | 0                    | 0                   | 0                    |
| <b>seq1817</b> | Firmicutes    | Bacilli      | 0                   | 0                    | 0                   | 0                    |
| <b>seq304</b>  | Firmicutes    | Clostridia   | 0                   | 0                    | 189                 | 403                  |
| <b>seq632</b>  | Firmicutes    | Clostridia   | 0                   | 0                    | 0                   | 0                    |
| <b>seq1759</b> | Firmicutes    | Clostridia   | 0                   | 0                    | 0                   | 0                    |
| <b>seq514</b>  | Firmicutes    | Clostridia   | 0                   | 0                    | 0                   | 0                    |
| <b>seq658</b>  | Firmicutes    | Clostridia   | 0                   | 0                    | 0                   | 0                    |
| <b>seq955</b>  | Firmicutes    | Clostridia   | 0                   | 0                    | 0                   | 0                    |
| <b>seq1337</b> | Firmicutes    | Clostridia   | 0                   | 0                    | 0                   | 0                    |
| <b>seq1352</b> | Firmicutes    | Clostridia   | 0                   | 0                    | 0                   | 0                    |
| <b>seq1372</b> | Firmicutes    | Clostridia   | 0                   | 0                    | 0                   | 0                    |
| <b>seq1377</b> | Firmicutes    | Clostridia   | 0                   | 0                    | 0                   | 0                    |
| <b>seq1446</b> | Firmicutes    | Clostridia   | 0                   | 0                    | 0                   | 0                    |
| <b>seq1605</b> | Firmicutes    | Clostridia   | 0                   | 0                    | 0                   | 0                    |
| <b>seq1663</b> | Firmicutes    | Clostridia   | 0                   | 0                    | 0                   | 0                    |
| <b>seq1664</b> | Firmicutes    | Clostridia   | 0                   | 0                    | 0                   | 0                    |
| <b>seq1725</b> | Firmicutes    | Clostridia   | 0                   | 0                    | 0                   | 0                    |
| <b>seq1742</b> | Firmicutes    | Clostridia   | 0                   | 0                    | 0                   | 0                    |
| <b>seq1776</b> | Firmicutes    | Clostridia   | 0                   | 0                    | 0                   | 0                    |
| <b>seq1777</b> | Firmicutes    | Clostridia   | 0                   | 0                    | 0                   | 0                    |
| <b>seq1821</b> | Firmicutes    | Clostridia   | 0                   | 0                    | 0                   | 0                    |
| <b>seq1822</b> | Firmicutes    | Clostridia   | 0                   | 0                    | 0                   | 0                    |
| <b>seq1850</b> | Firmicutes    | Clostridia   | 0                   | 0                    | 0                   | 0                    |
| <b>seq836</b>  | Firmicutes    | Clostridia   | 0                   | 0                    | 0                   | 0                    |
| <b>seq62</b>   | Firmicutes    | Clostridia   | 500                 | 312                  | 1406                | 3817                 |
| <b>seq175</b>  | Firmicutes    | Clostridia   | 0                   | 0                    | 0                   | 0                    |



Sequence Count Table

|                | <b>Phylum</b> | <b>Class</b> | <b>Subject27WK0</b> | <b>Subject27WK12</b> | <b>Subject15WK0</b> | <b>Subject15WK12</b> |
|----------------|---------------|--------------|---------------------|----------------------|---------------------|----------------------|
| <b>seq1453</b> | Firmicutes    | Bacilli      | 34                  | 0                    | 0                   | 0                    |
| <b>seq1574</b> | Firmicutes    | Bacilli      | 0                   | 0                    | 0                   | 0                    |
| <b>seq1638</b> | Firmicutes    | Bacilli      | 0                   | 0                    | 0                   | 0                    |
| <b>seq1640</b> | Firmicutes    | Bacilli      | 0                   | 17                   | 0                   | 0                    |
| <b>seq1887</b> | Firmicutes    | Bacilli      | 0                   | 0                    | 0                   | 0                    |
| <b>seq1342</b> | Firmicutes    | Bacilli      | 8                   | 42                   | 0                   | 0                    |
| <b>seq1757</b> | Firmicutes    | Bacilli      | 0                   | 0                    | 0                   | 0                    |
| <b>seq1817</b> | Firmicutes    | Bacilli      | 0                   | 0                    | 0                   | 0                    |
| <b>seq304</b>  | Firmicutes    | Clostridia   | 0                   | 0                    | 0                   | 0                    |
| <b>seq632</b>  | Firmicutes    | Clostridia   | 0                   | 0                    | 0                   | 0                    |
| <b>seq1759</b> | Firmicutes    | Clostridia   | 0                   | 0                    | 0                   | 0                    |
| <b>seq514</b>  | Firmicutes    | Clostridia   | 0                   | 0                    | 0                   | 0                    |
| <b>seq658</b>  | Firmicutes    | Clostridia   | 0                   | 0                    | 0                   | 0                    |
| <b>seq955</b>  | Firmicutes    | Clostridia   | 0                   | 0                    | 0                   | 0                    |
| <b>seq1337</b> | Firmicutes    | Clostridia   | 0                   | 0                    | 0                   | 0                    |
| <b>seq1352</b> | Firmicutes    | Clostridia   | 0                   | 0                    | 0                   | 0                    |
| <b>seq1372</b> | Firmicutes    | Clostridia   | 0                   | 0                    | 0                   | 0                    |
| <b>seq1377</b> | Firmicutes    | Clostridia   | 0                   | 0                    | 0                   | 0                    |
| <b>seq1446</b> | Firmicutes    | Clostridia   | 0                   | 0                    | 0                   | 0                    |
| <b>seq1605</b> | Firmicutes    | Clostridia   | 0                   | 0                    | 0                   | 0                    |
| <b>seq1663</b> | Firmicutes    | Clostridia   | 0                   | 0                    | 0                   | 0                    |
| <b>seq1664</b> | Firmicutes    | Clostridia   | 0                   | 0                    | 0                   | 0                    |
| <b>seq1725</b> | Firmicutes    | Clostridia   | 0                   | 0                    | 0                   | 0                    |
| <b>seq1742</b> | Firmicutes    | Clostridia   | 0                   | 0                    | 0                   | 0                    |
| <b>seq1776</b> | Firmicutes    | Clostridia   | 0                   | 0                    | 0                   | 0                    |
| <b>seq1777</b> | Firmicutes    | Clostridia   | 0                   | 0                    | 0                   | 0                    |
| <b>seq1821</b> | Firmicutes    | Clostridia   | 0                   | 0                    | 0                   | 0                    |
| <b>seq1822</b> | Firmicutes    | Clostridia   | 0                   | 0                    | 0                   | 0                    |
| <b>seq1850</b> | Firmicutes    | Clostridia   | 0                   | 0                    | 0                   | 0                    |
| <b>seq836</b>  | Firmicutes    | Clostridia   | 0                   | 0                    | 0                   | 0                    |
| <b>seq62</b>   | Firmicutes    | Clostridia   | 25                  | 169                  | 445                 | 463                  |
| <b>seq175</b>  | Firmicutes    | Clostridia   | 2124                | 2191                 | 476                 | 1820                 |

Sequence Count Table

|                | <b>Phylum</b> | <b>Class</b> | <b>Δ</b> |  |  |  |
|----------------|---------------|--------------|----------|--|--|--|
| <b>seq1453</b> | Firmicutes    | Bacilli      |          |  |  |  |
| <b>seq1574</b> | Firmicutes    | Bacilli      |          |  |  |  |
| <b>seq1638</b> | Firmicutes    | Bacilli      |          |  |  |  |
| <b>seq1640</b> | Firmicutes    | Bacilli      |          |  |  |  |
| <b>seq1887</b> | Firmicutes    | Bacilli      |          |  |  |  |
| <b>seq1342</b> | Firmicutes    | Bacilli      |          |  |  |  |
| <b>seq1757</b> | Firmicutes    | Bacilli      |          |  |  |  |
| <b>seq1817</b> | Firmicutes    | Bacilli      |          |  |  |  |
| <b>seq304</b>  | Firmicutes    | Clostridia   |          |  |  |  |
| <b>seq632</b>  | Firmicutes    | Clostridia   |          |  |  |  |
| <b>seq1759</b> | Firmicutes    | Clostridia   |          |  |  |  |
| <b>seq514</b>  | Firmicutes    | Clostridia   |          |  |  |  |
| <b>seq658</b>  | Firmicutes    | Clostridia   |          |  |  |  |
| <b>seq955</b>  | Firmicutes    | Clostridia   |          |  |  |  |
| <b>seq1337</b> | Firmicutes    | Clostridia   |          |  |  |  |
| <b>seq1352</b> | Firmicutes    | Clostridia   |          |  |  |  |
| <b>seq1372</b> | Firmicutes    | Clostridia   |          |  |  |  |
| <b>seq1377</b> | Firmicutes    | Clostridia   |          |  |  |  |
| <b>seq1446</b> | Firmicutes    | Clostridia   |          |  |  |  |
| <b>seq1605</b> | Firmicutes    | Clostridia   |          |  |  |  |
| <b>seq1663</b> | Firmicutes    | Clostridia   |          |  |  |  |
| <b>seq1664</b> | Firmicutes    | Clostridia   |          |  |  |  |
| <b>seq1725</b> | Firmicutes    | Clostridia   |          |  |  |  |
| <b>seq1742</b> | Firmicutes    | Clostridia   |          |  |  |  |
| <b>seq1776</b> | Firmicutes    | Clostridia   |          |  |  |  |
| <b>seq1777</b> | Firmicutes    | Clostridia   |          |  |  |  |
| <b>seq1821</b> | Firmicutes    | Clostridia   |          |  |  |  |
| <b>seq1822</b> | Firmicutes    | Clostridia   |          |  |  |  |
| <b>seq1850</b> | Firmicutes    | Clostridia   |          |  |  |  |
| <b>seq836</b>  | Firmicutes    | Clostridia   |          |  |  |  |
| <b>seq62</b>   | Firmicutes    | Clostridia   |          |  |  |  |
| <b>seq175</b>  | Firmicutes    | Clostridia   |          |  |  |  |

Sequence Count Table

|                | <b>Phylum</b> | <b>Class</b> | <b>Order</b>  | <b>Family</b>         |
|----------------|---------------|--------------|---------------|-----------------------|
| <b>seq745</b>  | Firmicutes    | Clostridia   | Clostridiales | Peptostreptococcaceae |
| <b>seq803</b>  | Firmicutes    | Clostridia   | Clostridiales | Peptostreptococcaceae |
| <b>seq1526</b> | Firmicutes    | Clostridia   | Clostridiales | Peptostreptococcaceae |
| <b>seq158</b>  | Firmicutes    | Clostridia   | Clostridiales | Peptostreptococcaceae |
| <b>seq405</b>  | Firmicutes    | Clostridia   | Clostridiales | Peptostreptococcaceae |
| <b>seq173</b>  | Firmicutes    | Clostridia   | Clostridiales | Peptostreptococcaceae |
| <b>seq758</b>  | Firmicutes    | Clostridia   | Clostridiales | Peptostreptococcaceae |
| <b>seq1296</b> | Firmicutes    | Clostridia   | Clostridiales | Ruminococcaceae       |
| <b>seq1581</b> | Firmicutes    | Clostridia   | Clostridiales | Ruminococcaceae       |
| <b>seq1071</b> | Firmicutes    | Clostridia   | Clostridiales | Ruminococcaceae       |
| <b>seq1811</b> | Firmicutes    | Clostridia   | Clostridiales | Ruminococcaceae       |
| <b>seq749</b>  | Firmicutes    | Clostridia   | Clostridiales | Ruminococcaceae       |
| <b>seq798</b>  | Firmicutes    | Clostridia   | Clostridiales | Ruminococcaceae       |
| <b>seq1503</b> | Firmicutes    | Clostridia   | Clostridiales | Ruminococcaceae       |
| <b>seq1654</b> | Firmicutes    | Clostridia   | Clostridiales | Ruminococcaceae       |
| <b>seq1695</b> | Firmicutes    | Clostridia   | Clostridiales | Ruminococcaceae       |
| <b>seq639</b>  | Firmicutes    | Clostridia   | Clostridiales | Ruminococcaceae       |
| <b>seq650</b>  | Firmicutes    | Clostridia   | Clostridiales | Ruminococcaceae       |
| <b>seq1118</b> | Firmicutes    | Clostridia   | Clostridiales | Ruminococcaceae       |
| <b>seq1127</b> | Firmicutes    | Clostridia   | Clostridiales | Ruminococcaceae       |
| <b>seq89</b>   | Firmicutes    | Clostridia   | Clostridiales | Ruminococcaceae       |
| <b>seq164</b>  | Firmicutes    | Clostridia   | Clostridiales | Ruminococcaceae       |
| <b>seq213</b>  | Firmicutes    | Clostridia   | Clostridiales | Ruminococcaceae       |
| <b>seq498</b>  | Firmicutes    | Clostridia   | Clostridiales | Ruminococcaceae       |
| <b>seq504</b>  | Firmicutes    | Clostridia   | Clostridiales | Ruminococcaceae       |
| <b>seq580</b>  | Firmicutes    | Clostridia   | Clostridiales | Ruminococcaceae       |
| <b>seq752</b>  | Firmicutes    | Clostridia   | Clostridiales | Ruminococcaceae       |
| <b>seq827</b>  | Firmicutes    | Clostridia   | Clostridiales | Ruminococcaceae       |
| <b>seq847</b>  | Firmicutes    | Clostridia   | Clostridiales | Ruminococcaceae       |
| <b>seq865</b>  | Firmicutes    | Clostridia   | Clostridiales | Ruminococcaceae       |
| <b>seq992</b>  | Firmicutes    | Clostridia   | Clostridiales | Ruminococcaceae       |
| <b>seq1050</b> | Firmicutes    | Clostridia   | Clostridiales | Ruminococcaceae       |

Sequence Count Table

|                | <b>Phylum</b> | <b>Class</b> | <b>Genus</b>        | <b>Species</b> |
|----------------|---------------|--------------|---------------------|----------------|
| <b>seq745</b>  | Firmicutes    | Clostridia   | Peptoclostridium    |                |
| <b>seq803</b>  | Firmicutes    | Clostridia   | Peptostreptococcus  | anaerobius     |
| <b>seq1526</b> | Firmicutes    | Clostridia   | Peptostreptococcus  | stomatis       |
| <b>seq158</b>  | Firmicutes    | Clostridia   | Romboutsia          |                |
| <b>seq405</b>  | Firmicutes    | Clostridia   | Romboutsia          | sedimentorum   |
| <b>seq173</b>  | Firmicutes    | Clostridia   | Terrisporobacter    |                |
| <b>seq758</b>  | Firmicutes    | Clostridia   |                     |                |
| <b>seq1296</b> | Firmicutes    | Clostridia   | Acetanaerobacterium |                |
| <b>seq1581</b> | Firmicutes    | Clostridia   | Acetanaerobacterium |                |
| <b>seq1071</b> | Firmicutes    | Clostridia   | Anaerofilum         |                |
| <b>seq1811</b> | Firmicutes    | Clostridia   | Anaerofilum         |                |
| <b>seq749</b>  | Firmicutes    | Clostridia   | Anaerotruncus       |                |
| <b>seq798</b>  | Firmicutes    | Clostridia   | Anaerotruncus       | colihominis    |
| <b>seq1503</b> | Firmicutes    | Clostridia   | Anaerotruncus       |                |
| <b>seq1654</b> | Firmicutes    | Clostridia   | Anaerotruncus       |                |
| <b>seq1695</b> | Firmicutes    | Clostridia   | Anaerotruncus       | rubiinfantis   |
| <b>seq639</b>  | Firmicutes    | Clostridia   | Angelakisella       |                |
| <b>seq650</b>  | Firmicutes    | Clostridia   | Angelakisella       |                |
| <b>seq1118</b> | Firmicutes    | Clostridia   | Angelakisella       |                |
| <b>seq1127</b> | Firmicutes    | Clostridia   | Angelakisella       |                |
| <b>seq89</b>   | Firmicutes    | Clostridia   | Butyricoccus        |                |
| <b>seq164</b>  | Firmicutes    | Clostridia   | Butyricoccus        | faecihominis   |
| <b>seq213</b>  | Firmicutes    | Clostridia   | Butyricoccus        |                |
| <b>seq498</b>  | Firmicutes    | Clostridia   | Butyricoccus        |                |
| <b>seq504</b>  | Firmicutes    | Clostridia   | Butyricoccus        |                |
| <b>seq580</b>  | Firmicutes    | Clostridia   | Butyricoccus        | desmolans      |
| <b>seq752</b>  | Firmicutes    | Clostridia   | Butyricoccus        |                |
| <b>seq827</b>  | Firmicutes    | Clostridia   | Butyricoccus        |                |
| <b>seq847</b>  | Firmicutes    | Clostridia   | Butyricoccus        |                |
| <b>seq865</b>  | Firmicutes    | Clostridia   | Butyricoccus        |                |
| <b>seq992</b>  | Firmicutes    | Clostridia   | Butyricoccus        |                |
| <b>seq1050</b> | Firmicutes    | Clostridia   | Butyricoccus        |                |

Sequence Count Table

|                | <b>Phylum</b> | <b>Class</b> | <b>Subject34WK0</b> | <b>Subject34WK12</b> | <b>Subject16WK0</b> | <b>Subject16WK12</b> |
|----------------|---------------|--------------|---------------------|----------------------|---------------------|----------------------|
| <b>seq745</b>  | Firmicutes    | Clostridia   | 0                   | 0                    | 0                   | 0                    |
| <b>seq803</b>  | Firmicutes    | Clostridia   | 0                   | 0                    | 0                   | 0                    |
| <b>seq1526</b> | Firmicutes    | Clostridia   | 0                   | 0                    | 0                   | 0                    |
| <b>seq158</b>  | Firmicutes    | Clostridia   | 0                   | 0                    | 115                 | 0                    |
| <b>seq405</b>  | Firmicutes    | Clostridia   | 0                   | 0                    | 0                   | 0                    |
| <b>seq173</b>  | Firmicutes    | Clostridia   | 0                   | 6                    | 161                 | 147                  |
| <b>seq758</b>  | Firmicutes    | Clostridia   | 0                   | 0                    | 0                   | 0                    |
| <b>seq1296</b> | Firmicutes    | Clostridia   | 0                   | 0                    | 0                   | 0                    |
| <b>seq1581</b> | Firmicutes    | Clostridia   | 0                   | 0                    | 0                   | 0                    |
| <b>seq1071</b> | Firmicutes    | Clostridia   | 0                   | 0                    | 0                   | 0                    |
| <b>seq1811</b> | Firmicutes    | Clostridia   | 0                   | 0                    | 0                   | 0                    |
| <b>seq749</b>  | Firmicutes    | Clostridia   | 12                  | 87                   | 0                   | 0                    |
| <b>seq798</b>  | Firmicutes    | Clostridia   | 0                   | 0                    | 0                   | 0                    |
| <b>seq1503</b> | Firmicutes    | Clostridia   | 0                   | 0                    | 0                   | 0                    |
| <b>seq1654</b> | Firmicutes    | Clostridia   | 0                   | 0                    | 0                   | 0                    |
| <b>seq1695</b> | Firmicutes    | Clostridia   | 0                   | 0                    | 0                   | 0                    |
| <b>seq639</b>  | Firmicutes    | Clostridia   | 0                   | 4                    | 0                   | 0                    |
| <b>seq650</b>  | Firmicutes    | Clostridia   | 0                   | 0                    | 0                   | 28                   |
| <b>seq1118</b> | Firmicutes    | Clostridia   | 0                   | 0                    | 0                   | 0                    |
| <b>seq1127</b> | Firmicutes    | Clostridia   | 0                   | 0                    | 0                   | 0                    |
| <b>seq89</b>   | Firmicutes    | Clostridia   | 17                  | 327                  | 73                  | 81                   |
| <b>seq164</b>  | Firmicutes    | Clostridia   | 0                   | 0                    | 0                   | 0                    |
| <b>seq213</b>  | Firmicutes    | Clostridia   | 0                   | 0                    | 371                 | 446                  |
| <b>seq498</b>  | Firmicutes    | Clostridia   | 0                   | 0                    | 0                   | 0                    |
| <b>seq504</b>  | Firmicutes    | Clostridia   | 0                   | 0                    | 29                  | 93                   |
| <b>seq580</b>  | Firmicutes    | Clostridia   | 0                   | 0                    | 0                   | 0                    |
| <b>seq752</b>  | Firmicutes    | Clostridia   | 0                   | 0                    | 0                   | 0                    |
| <b>seq827</b>  | Firmicutes    | Clostridia   | 0                   | 0                    | 0                   | 0                    |
| <b>seq847</b>  | Firmicutes    | Clostridia   | 0                   | 0                    | 0                   | 0                    |
| <b>seq865</b>  | Firmicutes    | Clostridia   | 0                   | 0                    | 0                   | 0                    |
| <b>seq992</b>  | Firmicutes    | Clostridia   | 0                   | 0                    | 0                   | 0                    |
| <b>seq1050</b> | Firmicutes    | Clostridia   | 0                   | 0                    | 0                   | 0                    |

Sequence Count Table

|                | <b>Phylum</b> | <b>Class</b> | <b>Subject17WK0</b> | <b>Subject17WK12</b> | <b>Subject1WK0</b> | <b>Subject1WK12</b> |
|----------------|---------------|--------------|---------------------|----------------------|--------------------|---------------------|
| <b>seq745</b>  | Firmicutes    | Clostridia   | 0                   | 0                    | 0                  | 0                   |
| <b>seq803</b>  | Firmicutes    | Clostridia   | 0                   | 0                    | 0                  | 0                   |
| <b>seq1526</b> | Firmicutes    | Clostridia   | 0                   | 0                    | 0                  | 0                   |
| <b>seq158</b>  | Firmicutes    | Clostridia   | 132                 | 31                   | 13                 | 15                  |
| <b>seq405</b>  | Firmicutes    | Clostridia   | 0                   | 0                    | 0                  | 0                   |
| <b>seq173</b>  | Firmicutes    | Clostridia   | 52                  | 240                  | 0                  | 0                   |
| <b>seq758</b>  | Firmicutes    | Clostridia   | 0                   | 0                    | 0                  | 0                   |
| <b>seq1296</b> | Firmicutes    | Clostridia   | 0                   | 0                    | 0                  | 4                   |
| <b>seq1581</b> | Firmicutes    | Clostridia   | 0                   | 0                    | 0                  | 0                   |
| <b>seq1071</b> | Firmicutes    | Clostridia   | 0                   | 0                    | 0                  | 0                   |
| <b>seq1811</b> | Firmicutes    | Clostridia   | 0                   | 0                    | 0                  | 0                   |
| <b>seq749</b>  | Firmicutes    | Clostridia   | 31                  | 8                    | 0                  | 0                   |
| <b>seq798</b>  | Firmicutes    | Clostridia   | 0                   | 0                    | 11                 | 12                  |
| <b>seq1503</b> | Firmicutes    | Clostridia   | 0                   | 0                    | 0                  | 0                   |
| <b>seq1654</b> | Firmicutes    | Clostridia   | 0                   | 0                    | 0                  | 0                   |
| <b>seq1695</b> | Firmicutes    | Clostridia   | 0                   | 0                    | 0                  | 0                   |
| <b>seq639</b>  | Firmicutes    | Clostridia   | 0                   | 0                    | 0                  | 0                   |
| <b>seq650</b>  | Firmicutes    | Clostridia   | 36                  | 16                   | 0                  | 0                   |
| <b>seq1118</b> | Firmicutes    | Clostridia   | 0                   | 0                    | 0                  | 0                   |
| <b>seq1127</b> | Firmicutes    | Clostridia   | 0                   | 0                    | 52                 | 46                  |
| <b>seq89</b>   | Firmicutes    | Clostridia   | 127                 | 1795                 | 165                | 179                 |
| <b>seq164</b>  | Firmicutes    | Clostridia   | 0                   | 0                    | 412                | 360                 |
| <b>seq213</b>  | Firmicutes    | Clostridia   | 0                   | 0                    | 0                  | 0                   |
| <b>seq498</b>  | Firmicutes    | Clostridia   | 0                   | 0                    | 0                  | 0                   |
| <b>seq504</b>  | Firmicutes    | Clostridia   | 0                   | 271                  | 0                  | 0                   |
| <b>seq580</b>  | Firmicutes    | Clostridia   | 25                  | 48                   | 0                  | 0                   |
| <b>seq752</b>  | Firmicutes    | Clostridia   | 29                  | 284                  | 0                  | 0                   |
| <b>seq827</b>  | Firmicutes    | Clostridia   | 0                   | 0                    | 0                  | 0                   |
| <b>seq847</b>  | Firmicutes    | Clostridia   | 0                   | 0                    | 23                 | 16                  |
| <b>seq865</b>  | Firmicutes    | Clostridia   | 0                   | 0                    | 0                  | 0                   |
| <b>seq992</b>  | Firmicutes    | Clostridia   | 0                   | 0                    | 0                  | 0                   |
| <b>seq1050</b> | Firmicutes    | Clostridia   | 0                   | 0                    | 0                  | 0                   |

Sequence Count Table

|                | <b>Phylum</b> | <b>Class</b> | <b>Subject2WK0</b> | <b>Subject2WK12</b> | <b>Subject3WK0</b> | <b>Subject3WK12</b> |
|----------------|---------------|--------------|--------------------|---------------------|--------------------|---------------------|
| <b>seq745</b>  | Firmicutes    | Clostridia   | 0                  | 0                   | 0                  | 0                   |
| <b>seq803</b>  | Firmicutes    | Clostridia   | 0                  | 10                  | 0                  | 0                   |
| <b>seq1526</b> | Firmicutes    | Clostridia   | 0                  | 0                   | 0                  | 0                   |
| <b>seq158</b>  | Firmicutes    | Clostridia   | 80                 | 406                 | 1463               | 0                   |
| <b>seq405</b>  | Firmicutes    | Clostridia   | 0                  | 0                   | 0                  | 0                   |
| <b>seq173</b>  | Firmicutes    | Clostridia   | 241                | 59                  | 0                  | 0                   |
| <b>seq758</b>  | Firmicutes    | Clostridia   | 0                  | 0                   | 0                  | 0                   |
| <b>seq1296</b> | Firmicutes    | Clostridia   | 0                  | 0                   | 0                  | 0                   |
| <b>seq1581</b> | Firmicutes    | Clostridia   | 0                  | 0                   | 0                  | 0                   |
| <b>seq1071</b> | Firmicutes    | Clostridia   | 0                  | 0                   | 0                  | 0                   |
| <b>seq1811</b> | Firmicutes    | Clostridia   | 0                  | 0                   | 0                  | 0                   |
| <b>seq749</b>  | Firmicutes    | Clostridia   | 0                  | 0                   | 0                  | 0                   |
| <b>seq798</b>  | Firmicutes    | Clostridia   | 0                  | 0                   | 0                  | 0                   |
| <b>seq1503</b> | Firmicutes    | Clostridia   | 0                  | 0                   | 0                  | 0                   |
| <b>seq1654</b> | Firmicutes    | Clostridia   | 0                  | 0                   | 0                  | 0                   |
| <b>seq1695</b> | Firmicutes    | Clostridia   | 0                  | 0                   | 0                  | 0                   |
| <b>seq639</b>  | Firmicutes    | Clostridia   | 0                  | 0                   | 0                  | 0                   |
| <b>seq650</b>  | Firmicutes    | Clostridia   | 0                  | 0                   | 0                  | 0                   |
| <b>seq1118</b> | Firmicutes    | Clostridia   | 0                  | 0                   | 0                  | 0                   |
| <b>seq1127</b> | Firmicutes    | Clostridia   | 0                  | 0                   | 0                  | 0                   |
| <b>seq89</b>   | Firmicutes    | Clostridia   | 463                | 108                 | 253                | 139                 |
| <b>seq164</b>  | Firmicutes    | Clostridia   | 743                | 171                 | 300                | 188                 |
| <b>seq213</b>  | Firmicutes    | Clostridia   | 0                  | 0                   | 0                  | 0                   |
| <b>seq498</b>  | Firmicutes    | Clostridia   | 0                  | 0                   | 0                  | 0                   |
| <b>seq504</b>  | Firmicutes    | Clostridia   | 0                  | 0                   | 112                | 0                   |
| <b>seq580</b>  | Firmicutes    | Clostridia   | 0                  | 0                   | 0                  | 0                   |
| <b>seq752</b>  | Firmicutes    | Clostridia   | 0                  | 0                   | 0                  | 0                   |
| <b>seq827</b>  | Firmicutes    | Clostridia   | 0                  | 0                   | 0                  | 0                   |
| <b>seq847</b>  | Firmicutes    | Clostridia   | 79                 | 8                   | 0                  | 0                   |
| <b>seq865</b>  | Firmicutes    | Clostridia   | 0                  | 0                   | 155                | 37                  |
| <b>seq992</b>  | Firmicutes    | Clostridia   | 0                  | 0                   | 0                  | 0                   |
| <b>seq1050</b> | Firmicutes    | Clostridia   | 0                  | 0                   | 0                  | 0                   |

Sequence Count Table

|                | <b>Phylum</b> | <b>Class</b> | <b>Subject4WK0</b> | <b>Subject4WK12</b> | <b>Subject5WK0</b> | <b>Subject5WK12</b> |
|----------------|---------------|--------------|--------------------|---------------------|--------------------|---------------------|
| <b>seq745</b>  | Firmicutes    | Clostridia   | 0                  | 0                   | 0                  | 0                   |
| <b>seq803</b>  | Firmicutes    | Clostridia   | 0                  | 0                   | 59                 | 199                 |
| <b>seq1526</b> | Firmicutes    | Clostridia   | 0                  | 0                   | 0                  | 0                   |
| <b>seq158</b>  | Firmicutes    | Clostridia   | 37                 | 39                  | 241                | 183                 |
| <b>seq405</b>  | Firmicutes    | Clostridia   | 0                  | 0                   | 0                  | 0                   |
| <b>seq173</b>  | Firmicutes    | Clostridia   | 262                | 50                  | 220                | 0                   |
| <b>seq758</b>  | Firmicutes    | Clostridia   | 0                  | 0                   | 0                  | 0                   |
| <b>seq1296</b> | Firmicutes    | Clostridia   | 3                  | 6                   | 7                  | 9                   |
| <b>seq1581</b> | Firmicutes    | Clostridia   | 0                  | 0                   | 0                  | 0                   |
| <b>seq1071</b> | Firmicutes    | Clostridia   | 10                 | 19                  | 12                 | 12                  |
| <b>seq1811</b> | Firmicutes    | Clostridia   | 0                  | 0                   | 0                  | 0                   |
| <b>seq749</b>  | Firmicutes    | Clostridia   | 0                  | 0                   | 0                  | 0                   |
| <b>seq798</b>  | Firmicutes    | Clostridia   | 0                  | 33                  | 11                 | 32                  |
| <b>seq1503</b> | Firmicutes    | Clostridia   | 0                  | 0                   | 0                  | 0                   |
| <b>seq1654</b> | Firmicutes    | Clostridia   | 0                  | 0                   | 0                  | 0                   |
| <b>seq1695</b> | Firmicutes    | Clostridia   | 0                  | 0                   | 0                  | 0                   |
| <b>seq639</b>  | Firmicutes    | Clostridia   | 81                 | 72                  | 0                  | 0                   |
| <b>seq650</b>  | Firmicutes    | Clostridia   | 0                  | 0                   | 0                  | 0                   |
| <b>seq1118</b> | Firmicutes    | Clostridia   | 0                  | 0                   | 0                  | 0                   |
| <b>seq1127</b> | Firmicutes    | Clostridia   | 0                  | 0                   | 0                  | 0                   |
| <b>seq89</b>   | Firmicutes    | Clostridia   | 117                | 162                 | 150                | 111                 |
| <b>seq164</b>  | Firmicutes    | Clostridia   | 0                  | 0                   | 0                  | 70                  |
| <b>seq213</b>  | Firmicutes    | Clostridia   | 194                | 255                 | 0                  | 0                   |
| <b>seq498</b>  | Firmicutes    | Clostridia   | 0                  | 0                   | 0                  | 0                   |
| <b>seq504</b>  | Firmicutes    | Clostridia   | 0                  | 0                   | 0                  | 0                   |
| <b>seq580</b>  | Firmicutes    | Clostridia   | 0                  | 0                   | 31                 | 0                   |
| <b>seq752</b>  | Firmicutes    | Clostridia   | 0                  | 0                   | 0                  | 0                   |
| <b>seq827</b>  | Firmicutes    | Clostridia   | 0                  | 0                   | 0                  | 0                   |
| <b>seq847</b>  | Firmicutes    | Clostridia   | 0                  | 0                   | 0                  | 0                   |
| <b>seq865</b>  | Firmicutes    | Clostridia   | 0                  | 0                   | 0                  | 0                   |
| <b>seq992</b>  | Firmicutes    | Clostridia   | 0                  | 0                   | 0                  | 0                   |
| <b>seq1050</b> | Firmicutes    | Clostridia   | 0                  | 0                   | 0                  | 0                   |



Sequence Count Table

|                | <b>Phylum</b> | <b>Class</b> | <b>Subject6WK0</b> | <b>Subject6WK12</b> | <b>Subject18WK0</b> | <b>Subject18WK12</b> |
|----------------|---------------|--------------|--------------------|---------------------|---------------------|----------------------|
| <b>seq745</b>  | Firmicutes    | Clostridia   | 0                  | 0                   | 0                   | 0                    |
| <b>seq803</b>  | Firmicutes    | Clostridia   | 0                  | 0                   | 0                   | 0                    |
| <b>seq1526</b> | Firmicutes    | Clostridia   | 0                  | 0                   | 0                   | 0                    |
| <b>seq158</b>  | Firmicutes    | Clostridia   | 94                 | 0                   | 54                  | 0                    |
| <b>seq405</b>  | Firmicutes    | Clostridia   | 0                  | 0                   | 0                   | 0                    |
| <b>seq173</b>  | Firmicutes    | Clostridia   | 50                 | 45                  | 383                 | 0                    |
| <b>seq758</b>  | Firmicutes    | Clostridia   | 0                  | 0                   | 0                   | 0                    |
| <b>seq1296</b> | Firmicutes    | Clostridia   | 0                  | 0                   | 0                   | 0                    |
| <b>seq1581</b> | Firmicutes    | Clostridia   | 0                  | 0                   | 15                  | 6                    |
| <b>seq1071</b> | Firmicutes    | Clostridia   | 0                  | 10                  | 0                   | 0                    |
| <b>seq1811</b> | Firmicutes    | Clostridia   | 0                  | 0                   | 0                   | 0                    |
| <b>seq749</b>  | Firmicutes    | Clostridia   | 0                  | 0                   | 0                   | 0                    |
| <b>seq798</b>  | Firmicutes    | Clostridia   | 0                  | 0                   | 7                   | 0                    |
| <b>seq1503</b> | Firmicutes    | Clostridia   | 0                  | 0                   | 0                   | 0                    |
| <b>seq1654</b> | Firmicutes    | Clostridia   | 0                  | 0                   | 0                   | 0                    |
| <b>seq1695</b> | Firmicutes    | Clostridia   | 0                  | 0                   | 0                   | 0                    |
| <b>seq639</b>  | Firmicutes    | Clostridia   | 0                  | 0                   | 0                   | 0                    |
| <b>seq650</b>  | Firmicutes    | Clostridia   | 25                 | 17                  | 0                   | 0                    |
| <b>seq1118</b> | Firmicutes    | Clostridia   | 0                  | 0                   | 0                   | 0                    |
| <b>seq1127</b> | Firmicutes    | Clostridia   | 0                  | 0                   | 0                   | 0                    |
| <b>seq89</b>   | Firmicutes    | Clostridia   | 145                | 175                 | 706                 | 686                  |
| <b>seq164</b>  | Firmicutes    | Clostridia   | 0                  | 0                   | 127                 | 101                  |
| <b>seq213</b>  | Firmicutes    | Clostridia   | 134                | 236                 | 416                 | 422                  |
| <b>seq498</b>  | Firmicutes    | Clostridia   | 0                  | 0                   | 0                   | 0                    |
| <b>seq504</b>  | Firmicutes    | Clostridia   | 0                  | 0                   | 0                   | 0                    |
| <b>seq580</b>  | Firmicutes    | Clostridia   | 0                  | 0                   | 34                  | 27                   |
| <b>seq752</b>  | Firmicutes    | Clostridia   | 0                  | 0                   | 0                   | 0                    |
| <b>seq827</b>  | Firmicutes    | Clostridia   | 0                  | 0                   | 0                   | 0                    |
| <b>seq847</b>  | Firmicutes    | Clostridia   | 0                  | 0                   | 0                   | 0                    |
| <b>seq865</b>  | Firmicutes    | Clostridia   | 0                  | 0                   | 0                   | 0                    |
| <b>seq992</b>  | Firmicutes    | Clostridia   | 0                  | 0                   | 0                   | 0                    |
| <b>seq1050</b> | Firmicutes    | Clostridia   | 5                  | 0                   | 0                   | 0                    |

Sequence Count Table

|                | <b>Phylum</b> | <b>Class</b> | <b>Subject19WK0</b> | <b>Subject19WK12</b> | <b>Subject20WK0</b> | <b>Subject20WK12</b> |
|----------------|---------------|--------------|---------------------|----------------------|---------------------|----------------------|
| <b>seq745</b>  | Firmicutes    | Clostridia   | 0                   | 0                    | 0                   | 0                    |
| <b>seq803</b>  | Firmicutes    | Clostridia   | 0                   | 0                    | 0                   | 0                    |
| <b>seq1526</b> | Firmicutes    | Clostridia   | 0                   | 0                    | 0                   | 18                   |
| <b>seq158</b>  | Firmicutes    | Clostridia   | 0                   | 100                  | 0                   | 21                   |
| <b>seq405</b>  | Firmicutes    | Clostridia   | 0                   | 0                    | 55                  | 0                    |
| <b>seq173</b>  | Firmicutes    | Clostridia   | 0                   | 0                    | 0                   | 0                    |
| <b>seq758</b>  | Firmicutes    | Clostridia   | 0                   | 0                    | 0                   | 0                    |
| <b>seq1296</b> | Firmicutes    | Clostridia   | 0                   | 5                    | 0                   | 0                    |
| <b>seq1581</b> | Firmicutes    | Clostridia   | 0                   | 0                    | 0                   | 0                    |
| <b>seq1071</b> | Firmicutes    | Clostridia   | 0                   | 0                    | 0                   | 0                    |
| <b>seq1811</b> | Firmicutes    | Clostridia   | 0                   | 0                    | 7                   | 0                    |
| <b>seq749</b>  | Firmicutes    | Clostridia   | 0                   | 0                    | 0                   | 0                    |
| <b>seq798</b>  | Firmicutes    | Clostridia   | 0                   | 0                    | 0                   | 0                    |
| <b>seq1503</b> | Firmicutes    | Clostridia   | 0                   | 0                    | 0                   | 0                    |
| <b>seq1654</b> | Firmicutes    | Clostridia   | 0                   | 0                    | 0                   | 0                    |
| <b>seq1695</b> | Firmicutes    | Clostridia   | 0                   | 0                    | 0                   | 0                    |
| <b>seq639</b>  | Firmicutes    | Clostridia   | 0                   | 0                    | 0                   | 0                    |
| <b>seq650</b>  | Firmicutes    | Clostridia   | 0                   | 0                    | 31                  | 12                   |
| <b>seq1118</b> | Firmicutes    | Clostridia   | 0                   | 0                    | 0                   | 0                    |
| <b>seq1127</b> | Firmicutes    | Clostridia   | 0                   | 0                    | 0                   | 0                    |
| <b>seq89</b>   | Firmicutes    | Clostridia   | 381                 | 858                  | 107                 | 163                  |
| <b>seq164</b>  | Firmicutes    | Clostridia   | 0                   | 0                    | 0                   | 112                  |
| <b>seq213</b>  | Firmicutes    | Clostridia   | 0                   | 0                    | 0                   | 0                    |
| <b>seq498</b>  | Firmicutes    | Clostridia   | 0                   | 0                    | 0                   | 0                    |
| <b>seq504</b>  | Firmicutes    | Clostridia   | 0                   | 0                    | 0                   | 0                    |
| <b>seq580</b>  | Firmicutes    | Clostridia   | 10                  | 6                    | 0                   | 0                    |
| <b>seq752</b>  | Firmicutes    | Clostridia   | 0                   | 0                    | 0                   | 0                    |
| <b>seq827</b>  | Firmicutes    | Clostridia   | 0                   | 0                    | 0                   | 0                    |
| <b>seq847</b>  | Firmicutes    | Clostridia   | 0                   | 0                    | 0                   | 0                    |
| <b>seq865</b>  | Firmicutes    | Clostridia   | 0                   | 25                   | 0                   | 0                    |
| <b>seq992</b>  | Firmicutes    | Clostridia   | 0                   | 0                    | 0                   | 0                    |
| <b>seq1050</b> | Firmicutes    | Clostridia   | 0                   | 0                    | 0                   | 0                    |

Sequence Count Table

|                | <b>Phylum</b> | <b>Class</b> | <b>Subject7WK0</b> | <b>Subject7WK12</b> | <b>Subject21WK0</b> | <b>Subject21WK12</b> |
|----------------|---------------|--------------|--------------------|---------------------|---------------------|----------------------|
| <b>seq745</b>  | Firmicutes    | Clostridia   | 0                  | 0                   | 0                   | 0                    |
| <b>seq803</b>  | Firmicutes    | Clostridia   | 0                  | 0                   | 0                   | 0                    |
| <b>seq1526</b> | Firmicutes    | Clostridia   | 0                  | 0                   | 0                   | 0                    |
| <b>seq158</b>  | Firmicutes    | Clostridia   | 29                 | 104                 | 0                   | 0                    |
| <b>seq405</b>  | Firmicutes    | Clostridia   | 0                  | 0                   | 0                   | 0                    |
| <b>seq173</b>  | Firmicutes    | Clostridia   | 0                  | 0                   | 0                   | 0                    |
| <b>seq758</b>  | Firmicutes    | Clostridia   | 0                  | 0                   | 0                   | 0                    |
| <b>seq1296</b> | Firmicutes    | Clostridia   | 0                  | 0                   | 0                   | 0                    |
| <b>seq1581</b> | Firmicutes    | Clostridia   | 0                  | 0                   | 0                   | 0                    |
| <b>seq1071</b> | Firmicutes    | Clostridia   | 0                  | 0                   | 0                   | 0                    |
| <b>seq1811</b> | Firmicutes    | Clostridia   | 0                  | 0                   | 0                   | 0                    |
| <b>seq749</b>  | Firmicutes    | Clostridia   | 0                  | 0                   | 0                   | 0                    |
| <b>seq798</b>  | Firmicutes    | Clostridia   | 21                 | 0                   | 0                   | 19                   |
| <b>seq1503</b> | Firmicutes    | Clostridia   | 0                  | 0                   | 0                   | 0                    |
| <b>seq1654</b> | Firmicutes    | Clostridia   | 0                  | 0                   | 0                   | 0                    |
| <b>seq1695</b> | Firmicutes    | Clostridia   | 0                  | 0                   | 0                   | 0                    |
| <b>seq639</b>  | Firmicutes    | Clostridia   | 0                  | 0                   | 0                   | 0                    |
| <b>seq650</b>  | Firmicutes    | Clostridia   | 72                 | 66                  | 0                   | 0                    |
| <b>seq1118</b> | Firmicutes    | Clostridia   | 0                  | 0                   | 0                   | 0                    |
| <b>seq1127</b> | Firmicutes    | Clostridia   | 0                  | 0                   | 0                   | 0                    |
| <b>seq89</b>   | Firmicutes    | Clostridia   | 100                | 200                 | 1767                | 568                  |
| <b>seq164</b>  | Firmicutes    | Clostridia   | 0                  | 112                 | 0                   | 0                    |
| <b>seq213</b>  | Firmicutes    | Clostridia   | 0                  | 0                   | 0                   | 0                    |
| <b>seq498</b>  | Firmicutes    | Clostridia   | 195                | 385                 | 0                   | 0                    |
| <b>seq504</b>  | Firmicutes    | Clostridia   | 0                  | 0                   | 0                   | 0                    |
| <b>seq580</b>  | Firmicutes    | Clostridia   | 0                  | 0                   | 44                  | 106                  |
| <b>seq752</b>  | Firmicutes    | Clostridia   | 0                  | 0                   | 0                   | 0                    |
| <b>seq827</b>  | Firmicutes    | Clostridia   | 0                  | 0                   | 0                   | 0                    |
| <b>seq847</b>  | Firmicutes    | Clostridia   | 0                  | 6                   | 0                   | 0                    |
| <b>seq865</b>  | Firmicutes    | Clostridia   | 0                  | 0                   | 0                   | 0                    |
| <b>seq992</b>  | Firmicutes    | Clostridia   | 38                 | 107                 | 0                   | 0                    |
| <b>seq1050</b> | Firmicutes    | Clostridia   | 0                  | 0                   | 0                   | 0                    |

Sequence Count Table

|                | <b>Phylum</b> | <b>Class</b> | <b>Subject8WK0</b> | <b>Subject8WK12</b> | <b>Subject9WK0</b> | <b>Subject9WK12</b> |
|----------------|---------------|--------------|--------------------|---------------------|--------------------|---------------------|
| <b>seq745</b>  | Firmicutes    | Clostridia   | 0                  | 0                   | 0                  | 0                   |
| <b>seq803</b>  | Firmicutes    | Clostridia   | 0                  | 0                   | 0                  | 0                   |
| <b>seq1526</b> | Firmicutes    | Clostridia   | 0                  | 0                   | 0                  | 0                   |
| <b>seq158</b>  | Firmicutes    | Clostridia   | 288                | 121                 | 0                  | 0                   |
| <b>seq405</b>  | Firmicutes    | Clostridia   | 0                  | 0                   | 0                  | 0                   |
| <b>seq173</b>  | Firmicutes    | Clostridia   | 74                 | 65                  | 0                  | 0                   |
| <b>seq758</b>  | Firmicutes    | Clostridia   | 0                  | 0                   | 0                  | 0                   |
| <b>seq1296</b> | Firmicutes    | Clostridia   | 0                  | 0                   | 9                  | 0                   |
| <b>seq1581</b> | Firmicutes    | Clostridia   | 0                  | 0                   | 0                  | 0                   |
| <b>seq1071</b> | Firmicutes    | Clostridia   | 0                  | 0                   | 0                  | 0                   |
| <b>seq1811</b> | Firmicutes    | Clostridia   | 0                  | 0                   | 0                  | 0                   |
| <b>seq749</b>  | Firmicutes    | Clostridia   | 0                  | 0                   | 0                  | 0                   |
| <b>seq798</b>  | Firmicutes    | Clostridia   | 0                  | 0                   | 30                 | 0                   |
| <b>seq1503</b> | Firmicutes    | Clostridia   | 0                  | 0                   | 0                  | 0                   |
| <b>seq1654</b> | Firmicutes    | Clostridia   | 0                  | 0                   | 0                  | 0                   |
| <b>seq1695</b> | Firmicutes    | Clostridia   | 0                  | 0                   | 0                  | 0                   |
| <b>seq639</b>  | Firmicutes    | Clostridia   | 0                  | 0                   | 72                 | 0                   |
| <b>seq650</b>  | Firmicutes    | Clostridia   | 0                  | 0                   | 0                  | 0                   |
| <b>seq1118</b> | Firmicutes    | Clostridia   | 0                  | 0                   | 0                  | 0                   |
| <b>seq1127</b> | Firmicutes    | Clostridia   | 0                  | 0                   | 0                  | 0                   |
| <b>seq89</b>   | Firmicutes    | Clostridia   | 456                | 452                 | 92                 | 359                 |
| <b>seq164</b>  | Firmicutes    | Clostridia   | 91                 | 93                  | 0                  | 116                 |
| <b>seq213</b>  | Firmicutes    | Clostridia   | 0                  | 0                   | 0                  | 0                   |
| <b>seq498</b>  | Firmicutes    | Clostridia   | 0                  | 0                   | 0                  | 0                   |
| <b>seq504</b>  | Firmicutes    | Clostridia   | 70                 | 106                 | 0                  | 0                   |
| <b>seq580</b>  | Firmicutes    | Clostridia   | 0                  | 0                   | 57                 | 0                   |
| <b>seq752</b>  | Firmicutes    | Clostridia   | 0                  | 0                   | 0                  | 0                   |
| <b>seq827</b>  | Firmicutes    | Clostridia   | 99                 | 88                  | 0                  | 0                   |
| <b>seq847</b>  | Firmicutes    | Clostridia   | 0                  | 0                   | 0                  | 0                   |
| <b>seq865</b>  | Firmicutes    | Clostridia   | 0                  | 0                   | 0                  | 0                   |
| <b>seq992</b>  | Firmicutes    | Clostridia   | 0                  | 0                   | 0                  | 0                   |
| <b>seq1050</b> | Firmicutes    | Clostridia   | 0                  | 0                   | 0                  | 0                   |

Sequence Count Table

|                | <b>Phylum</b> | <b>Class</b> | <b>Subject10WK0</b> | <b>Subject10WK12</b> | <b>Subject22WK0</b> | <b>Subject22WK12</b> |
|----------------|---------------|--------------|---------------------|----------------------|---------------------|----------------------|
| <b>seq745</b>  | Firmicutes    | Clostridia   | 0                   | 0                    | 0                   | 0                    |
| <b>seq803</b>  | Firmicutes    | Clostridia   | 0                   | 0                    | 0                   | 0                    |
| <b>seq1526</b> | Firmicutes    | Clostridia   | 0                   | 0                    | 0                   | 0                    |
| <b>seq158</b>  | Firmicutes    | Clostridia   | 0                   | 0                    | 243                 | 54                   |
| <b>seq405</b>  | Firmicutes    | Clostridia   | 0                   | 0                    | 0                   | 0                    |
| <b>seq173</b>  | Firmicutes    | Clostridia   | 0                   | 0                    | 63                  | 0                    |
| <b>seq758</b>  | Firmicutes    | Clostridia   | 0                   | 0                    | 0                   | 0                    |
| <b>seq1296</b> | Firmicutes    | Clostridia   | 0                   | 0                    | 0                   | 0                    |
| <b>seq1581</b> | Firmicutes    | Clostridia   | 0                   | 0                    | 0                   | 0                    |
| <b>seq1071</b> | Firmicutes    | Clostridia   | 0                   | 0                    | 0                   | 0                    |
| <b>seq1811</b> | Firmicutes    | Clostridia   | 0                   | 0                    | 0                   | 0                    |
| <b>seq749</b>  | Firmicutes    | Clostridia   | 0                   | 0                    | 0                   | 0                    |
| <b>seq798</b>  | Firmicutes    | Clostridia   | 13                  | 0                    | 0                   | 0                    |
| <b>seq1503</b> | Firmicutes    | Clostridia   | 0                   | 0                    | 20                  | 8                    |
| <b>seq1654</b> | Firmicutes    | Clostridia   | 0                   | 0                    | 0                   | 0                    |
| <b>seq1695</b> | Firmicutes    | Clostridia   | 0                   | 6                    | 0                   | 0                    |
| <b>seq639</b>  | Firmicutes    | Clostridia   | 29                  | 0                    | 0                   | 0                    |
| <b>seq650</b>  | Firmicutes    | Clostridia   | 0                   | 0                    | 54                  | 33                   |
| <b>seq1118</b> | Firmicutes    | Clostridia   | 0                   | 0                    | 0                   | 0                    |
| <b>seq1127</b> | Firmicutes    | Clostridia   | 0                   | 0                    | 0                   | 0                    |
| <b>seq89</b>   | Firmicutes    | Clostridia   | 188                 | 211                  | 150                 | 219                  |
| <b>seq164</b>  | Firmicutes    | Clostridia   | 521                 | 633                  | 164                 | 153                  |
| <b>seq213</b>  | Firmicutes    | Clostridia   | 0                   | 0                    | 0                   | 0                    |
| <b>seq498</b>  | Firmicutes    | Clostridia   | 0                   | 0                    | 0                   | 0                    |
| <b>seq504</b>  | Firmicutes    | Clostridia   | 0                   | 0                    | 0                   | 0                    |
| <b>seq580</b>  | Firmicutes    | Clostridia   | 18                  | 0                    | 0                   | 0                    |
| <b>seq752</b>  | Firmicutes    | Clostridia   | 0                   | 0                    | 0                   | 0                    |
| <b>seq827</b>  | Firmicutes    | Clostridia   | 0                   | 0                    | 0                   | 0                    |
| <b>seq847</b>  | Firmicutes    | Clostridia   | 0                   | 0                    | 0                   | 0                    |
| <b>seq865</b>  | Firmicutes    | Clostridia   | 0                   | 0                    | 0                   | 0                    |
| <b>seq992</b>  | Firmicutes    | Clostridia   | 0                   | 0                    | 0                   | 0                    |
| <b>seq1050</b> | Firmicutes    | Clostridia   | 69                  | 33                   | 0                   | 0                    |

Sequence Count Table

|                | <b>Phylum</b> | <b>Class</b> | <b>Subject23WK0</b> | <b>Subject23WK12</b> | <b>Subject24WK0</b> | <b>Subject24WK12</b> |
|----------------|---------------|--------------|---------------------|----------------------|---------------------|----------------------|
| <b>seq745</b>  | Firmicutes    | Clostridia   | 0                   | 0                    | 0                   | 0                    |
| <b>seq803</b>  | Firmicutes    | Clostridia   | 0                   | 0                    | 0                   | 0                    |
| <b>seq1526</b> | Firmicutes    | Clostridia   | 0                   | 0                    | 0                   | 0                    |
| <b>seq158</b>  | Firmicutes    | Clostridia   | 118                 | 107                  | 760                 | 0                    |
| <b>seq405</b>  | Firmicutes    | Clostridia   | 0                   | 0                    | 352                 | 50                   |
| <b>seq173</b>  | Firmicutes    | Clostridia   | 45                  | 908                  | 2257                | 144                  |
| <b>seq758</b>  | Firmicutes    | Clostridia   | 0                   | 0                    | 0                   | 0                    |
| <b>seq1296</b> | Firmicutes    | Clostridia   | 0                   | 0                    | 3                   | 0                    |
| <b>seq1581</b> | Firmicutes    | Clostridia   | 0                   | 0                    | 0                   | 0                    |
| <b>seq1071</b> | Firmicutes    | Clostridia   | 0                   | 0                    | 0                   | 0                    |
| <b>seq1811</b> | Firmicutes    | Clostridia   | 0                   | 0                    | 0                   | 0                    |
| <b>seq749</b>  | Firmicutes    | Clostridia   | 0                   | 0                    | 0                   | 0                    |
| <b>seq798</b>  | Firmicutes    | Clostridia   | 0                   | 0                    | 0                   | 0                    |
| <b>seq1503</b> | Firmicutes    | Clostridia   | 0                   | 0                    | 0                   | 0                    |
| <b>seq1654</b> | Firmicutes    | Clostridia   | 0                   | 0                    | 0                   | 0                    |
| <b>seq1695</b> | Firmicutes    | Clostridia   | 0                   | 7                    | 0                   | 0                    |
| <b>seq639</b>  | Firmicutes    | Clostridia   | 0                   | 27                   | 55                  | 126                  |
| <b>seq650</b>  | Firmicutes    | Clostridia   | 0                   | 0                    | 0                   | 0                    |
| <b>seq1118</b> | Firmicutes    | Clostridia   | 0                   | 0                    | 0                   | 0                    |
| <b>seq1127</b> | Firmicutes    | Clostridia   | 0                   | 0                    | 0                   | 0                    |
| <b>seq89</b>   | Firmicutes    | Clostridia   | 0                   | 104                  | 418                 | 380                  |
| <b>seq164</b>  | Firmicutes    | Clostridia   | 281                 | 441                  | 96                  | 0                    |
| <b>seq213</b>  | Firmicutes    | Clostridia   | 0                   | 0                    | 0                   | 0                    |
| <b>seq498</b>  | Firmicutes    | Clostridia   | 0                   | 0                    | 0                   | 0                    |
| <b>seq504</b>  | Firmicutes    | Clostridia   | 0                   | 0                    | 40                  | 55                   |
| <b>seq580</b>  | Firmicutes    | Clostridia   | 0                   | 0                    | 0                   | 0                    |
| <b>seq752</b>  | Firmicutes    | Clostridia   | 0                   | 0                    | 0                   | 0                    |
| <b>seq827</b>  | Firmicutes    | Clostridia   | 0                   | 63                   | 0                   | 0                    |
| <b>seq847</b>  | Firmicutes    | Clostridia   | 0                   | 0                    | 0                   | 0                    |
| <b>seq865</b>  | Firmicutes    | Clostridia   | 0                   | 0                    | 0                   | 0                    |
| <b>seq992</b>  | Firmicutes    | Clostridia   | 0                   | 0                    | 0                   | 0                    |
| <b>seq1050</b> | Firmicutes    | Clostridia   | 0                   | 0                    | 0                   | 18                   |

Sequence Count Table

|                | <b>Phylum</b> | <b>Class</b> | <b>Subject11WK0</b> | <b>Subject11WK12</b> | <b>Subject12WK0</b> | <b>Subject12WK12</b> |
|----------------|---------------|--------------|---------------------|----------------------|---------------------|----------------------|
| <b>seq745</b>  | Firmicutes    | Clostridia   | 0                   | 0                    | 0                   | 0                    |
| <b>seq803</b>  | Firmicutes    | Clostridia   | 0                   | 0                    | 0                   | 0                    |
| <b>seq1526</b> | Firmicutes    | Clostridia   | 0                   | 0                    | 0                   | 8                    |
| <b>seq158</b>  | Firmicutes    | Clostridia   | 0                   | 0                    | 0                   | 143                  |
| <b>seq405</b>  | Firmicutes    | Clostridia   | 0                   | 0                    | 0                   | 0                    |
| <b>seq173</b>  | Firmicutes    | Clostridia   | 0                   | 0                    | 0                   | 0                    |
| <b>seq758</b>  | Firmicutes    | Clostridia   | 0                   | 0                    | 0                   | 0                    |
| <b>seq1296</b> | Firmicutes    | Clostridia   | 0                   | 0                    | 0                   | 0                    |
| <b>seq1581</b> | Firmicutes    | Clostridia   | 0                   | 0                    | 0                   | 0                    |
| <b>seq1071</b> | Firmicutes    | Clostridia   | 0                   | 0                    | 0                   | 3                    |
| <b>seq1811</b> | Firmicutes    | Clostridia   | 0                   | 0                    | 0                   | 0                    |
| <b>seq749</b>  | Firmicutes    | Clostridia   | 0                   | 0                    | 0                   | 0                    |
| <b>seq798</b>  | Firmicutes    | Clostridia   | 13                  | 0                    | 0                   | 13                   |
| <b>seq1503</b> | Firmicutes    | Clostridia   | 0                   | 0                    | 0                   | 0                    |
| <b>seq1654</b> | Firmicutes    | Clostridia   | 0                   | 0                    | 0                   | 0                    |
| <b>seq1695</b> | Firmicutes    | Clostridia   | 0                   | 0                    | 0                   | 0                    |
| <b>seq639</b>  | Firmicutes    | Clostridia   | 0                   | 0                    | 0                   | 0                    |
| <b>seq650</b>  | Firmicutes    | Clostridia   | 0                   | 0                    | 0                   | 0                    |
| <b>seq1118</b> | Firmicutes    | Clostridia   | 0                   | 0                    | 0                   | 0                    |
| <b>seq1127</b> | Firmicutes    | Clostridia   | 0                   | 0                    | 0                   | 0                    |
| <b>seq89</b>   | Firmicutes    | Clostridia   | 0                   | 0                    | 0                   | 144                  |
| <b>seq164</b>  | Firmicutes    | Clostridia   | 0                   | 0                    | 78                  | 145                  |
| <b>seq213</b>  | Firmicutes    | Clostridia   | 0                   | 0                    | 195                 | 922                  |
| <b>seq498</b>  | Firmicutes    | Clostridia   | 0                   | 0                    | 0                   | 0                    |
| <b>seq504</b>  | Firmicutes    | Clostridia   | 0                   | 0                    | 0                   | 0                    |
| <b>seq580</b>  | Firmicutes    | Clostridia   | 57                  | 20                   | 0                   | 0                    |
| <b>seq752</b>  | Firmicutes    | Clostridia   | 0                   | 0                    | 0                   | 0                    |
| <b>seq827</b>  | Firmicutes    | Clostridia   | 0                   | 0                    | 0                   | 0                    |
| <b>seq847</b>  | Firmicutes    | Clostridia   | 21                  | 42                   | 0                   | 0                    |
| <b>seq865</b>  | Firmicutes    | Clostridia   | 0                   | 0                    | 0                   | 0                    |
| <b>seq992</b>  | Firmicutes    | Clostridia   | 0                   | 0                    | 0                   | 0                    |
| <b>seq1050</b> | Firmicutes    | Clostridia   | 0                   | 0                    | 0                   | 0                    |

Sequence Count Table

|                | <b>Phylum</b> | <b>Class</b> | <b>Subject25WK0</b> | <b>Subject25WK12</b> | <b>Subject38WK0</b> | <b>Subject38WK12</b> |
|----------------|---------------|--------------|---------------------|----------------------|---------------------|----------------------|
| <b>seq745</b>  | Firmicutes    | Clostridia   | 0                   | 0                    | 0                   | 0                    |
| <b>seq803</b>  | Firmicutes    | Clostridia   | 0                   | 0                    | 0                   | 0                    |
| <b>seq1526</b> | Firmicutes    | Clostridia   | 0                   | 0                    | 0                   | 0                    |
| <b>seq158</b>  | Firmicutes    | Clostridia   | 38                  | 623                  | 0                   | 0                    |
| <b>seq405</b>  | Firmicutes    | Clostridia   | 0                   | 0                    | 0                   | 0                    |
| <b>seq173</b>  | Firmicutes    | Clostridia   | 0                   | 0                    | 0                   | 0                    |
| <b>seq758</b>  | Firmicutes    | Clostridia   | 0                   | 0                    | 0                   | 0                    |
| <b>seq1296</b> | Firmicutes    | Clostridia   | 0                   | 0                    | 0                   | 0                    |
| <b>seq1581</b> | Firmicutes    | Clostridia   | 0                   | 0                    | 0                   | 0                    |
| <b>seq1071</b> | Firmicutes    | Clostridia   | 8                   | 0                    | 0                   | 0                    |
| <b>seq1811</b> | Firmicutes    | Clostridia   | 0                   | 0                    | 0                   | 0                    |
| <b>seq749</b>  | Firmicutes    | Clostridia   | 98                  | 0                    | 0                   | 0                    |
| <b>seq798</b>  | Firmicutes    | Clostridia   | 0                   | 0                    | 0                   | 0                    |
| <b>seq1503</b> | Firmicutes    | Clostridia   | 0                   | 0                    | 0                   | 0                    |
| <b>seq1654</b> | Firmicutes    | Clostridia   | 0                   | 0                    | 0                   | 0                    |
| <b>seq1695</b> | Firmicutes    | Clostridia   | 0                   | 0                    | 0                   | 0                    |
| <b>seq639</b>  | Firmicutes    | Clostridia   | 0                   | 0                    | 0                   | 0                    |
| <b>seq650</b>  | Firmicutes    | Clostridia   | 0                   | 0                    | 0                   | 0                    |
| <b>seq1118</b> | Firmicutes    | Clostridia   | 69                  | 0                    | 0                   | 0                    |
| <b>seq1127</b> | Firmicutes    | Clostridia   | 0                   | 0                    | 0                   | 0                    |
| <b>seq89</b>   | Firmicutes    | Clostridia   | 44                  | 0                    | 0                   | 0                    |
| <b>seq164</b>  | Firmicutes    | Clostridia   | 0                   | 0                    | 0                   | 0                    |
| <b>seq213</b>  | Firmicutes    | Clostridia   | 110                 | 16                   | 0                   | 0                    |
| <b>seq498</b>  | Firmicutes    | Clostridia   | 0                   | 0                    | 0                   | 0                    |
| <b>seq504</b>  | Firmicutes    | Clostridia   | 0                   | 0                    | 0                   | 0                    |
| <b>seq580</b>  | Firmicutes    | Clostridia   | 0                   | 0                    | 0                   | 0                    |
| <b>seq752</b>  | Firmicutes    | Clostridia   | 0                   | 0                    | 0                   | 0                    |
| <b>seq827</b>  | Firmicutes    | Clostridia   | 0                   | 0                    | 0                   | 0                    |
| <b>seq847</b>  | Firmicutes    | Clostridia   | 0                   | 0                    | 0                   | 0                    |
| <b>seq865</b>  | Firmicutes    | Clostridia   | 0                   | 0                    | 0                   | 0                    |
| <b>seq992</b>  | Firmicutes    | Clostridia   | 0                   | 0                    | 0                   | 0                    |
| <b>seq1050</b> | Firmicutes    | Clostridia   | 0                   | 0                    | 0                   | 0                    |



Sequence Count Table

|                | <b>Phylum</b> | <b>Class</b> | <b>Subject31WK0</b> | <b>Subject31WK12</b> | <b>Subject32WK0</b> | <b>Subject32WK12</b> |
|----------------|---------------|--------------|---------------------|----------------------|---------------------|----------------------|
| <b>seq745</b>  | Firmicutes    | Clostridia   | 0                   | 0                    | 0                   | 0                    |
| <b>seq803</b>  | Firmicutes    | Clostridia   | 0                   | 0                    | 0                   | 0                    |
| <b>seq1526</b> | Firmicutes    | Clostridia   | 0                   | 0                    | 0                   | 0                    |
| <b>seq158</b>  | Firmicutes    | Clostridia   | 0                   | 0                    | 0                   | 0                    |
| <b>seq405</b>  | Firmicutes    | Clostridia   | 0                   | 0                    | 0                   | 0                    |
| <b>seq173</b>  | Firmicutes    | Clostridia   | 0                   | 0                    | 0                   | 0                    |
| <b>seq758</b>  | Firmicutes    | Clostridia   | 0                   | 0                    | 0                   | 0                    |
| <b>seq1296</b> | Firmicutes    | Clostridia   | 0                   | 0                    | 0                   | 0                    |
| <b>seq1581</b> | Firmicutes    | Clostridia   | 0                   | 0                    | 0                   | 0                    |
| <b>seq1071</b> | Firmicutes    | Clostridia   | 0                   | 0                    | 0                   | 0                    |
| <b>seq1811</b> | Firmicutes    | Clostridia   | 0                   | 0                    | 0                   | 0                    |
| <b>seq749</b>  | Firmicutes    | Clostridia   | 0                   | 0                    | 0                   | 0                    |
| <b>seq798</b>  | Firmicutes    | Clostridia   | 0                   | 0                    | 0                   | 0                    |
| <b>seq1503</b> | Firmicutes    | Clostridia   | 0                   | 0                    | 0                   | 0                    |
| <b>seq1654</b> | Firmicutes    | Clostridia   | 0                   | 0                    | 0                   | 0                    |
| <b>seq1695</b> | Firmicutes    | Clostridia   | 0                   | 0                    | 0                   | 0                    |
| <b>seq639</b>  | Firmicutes    | Clostridia   | 0                   | 0                    | 0                   | 0                    |
| <b>seq650</b>  | Firmicutes    | Clostridia   | 0                   | 0                    | 0                   | 0                    |
| <b>seq1118</b> | Firmicutes    | Clostridia   | 0                   | 0                    | 0                   | 0                    |
| <b>seq1127</b> | Firmicutes    | Clostridia   | 0                   | 0                    | 0                   | 0                    |
| <b>seq89</b>   | Firmicutes    | Clostridia   | 0                   | 0                    | 177                 | 0                    |
| <b>seq164</b>  | Firmicutes    | Clostridia   | 0                   | 0                    | 0                   | 0                    |
| <b>seq213</b>  | Firmicutes    | Clostridia   | 0                   | 0                    | 0                   | 0                    |
| <b>seq498</b>  | Firmicutes    | Clostridia   | 0                   | 0                    | 0                   | 0                    |
| <b>seq504</b>  | Firmicutes    | Clostridia   | 0                   | 0                    | 0                   | 0                    |
| <b>seq580</b>  | Firmicutes    | Clostridia   | 0                   | 0                    | 0                   | 0                    |
| <b>seq752</b>  | Firmicutes    | Clostridia   | 0                   | 0                    | 0                   | 0                    |
| <b>seq827</b>  | Firmicutes    | Clostridia   | 0                   | 0                    | 0                   | 0                    |
| <b>seq847</b>  | Firmicutes    | Clostridia   | 0                   | 0                    | 0                   | 0                    |
| <b>seq865</b>  | Firmicutes    | Clostridia   | 0                   | 0                    | 0                   | 0                    |
| <b>seq992</b>  | Firmicutes    | Clostridia   | 0                   | 0                    | 0                   | 0                    |
| <b>seq1050</b> | Firmicutes    | Clostridia   | 0                   | 0                    | 0                   | 0                    |

Sequence Count Table

|                | <b>Phylum</b> | <b>Class</b> | <b>Subject13WK0</b> | <b>Subject13WK12</b> | <b>Subject39WK0</b> | <b>Subject39WK12</b> |
|----------------|---------------|--------------|---------------------|----------------------|---------------------|----------------------|
| <b>seq745</b>  | Firmicutes    | Clostridia   | 0                   | 0                    | 0                   | 0                    |
| <b>seq803</b>  | Firmicutes    | Clostridia   | 0                   | 0                    | 0                   | 0                    |
| <b>seq1526</b> | Firmicutes    | Clostridia   | 0                   | 0                    | 0                   | 0                    |
| <b>seq158</b>  | Firmicutes    | Clostridia   | 733                 | 183                  | 0                   | 35                   |
| <b>seq405</b>  | Firmicutes    | Clostridia   | 451                 | 0                    | 0                   | 0                    |
| <b>seq173</b>  | Firmicutes    | Clostridia   | 0                   | 0                    | 0                   | 15                   |
| <b>seq758</b>  | Firmicutes    | Clostridia   | 0                   | 0                    | 0                   | 0                    |
| <b>seq1296</b> | Firmicutes    | Clostridia   | 0                   | 0                    | 0                   | 0                    |
| <b>seq1581</b> | Firmicutes    | Clostridia   | 0                   | 0                    | 0                   | 0                    |
| <b>seq1071</b> | Firmicutes    | Clostridia   | 6                   | 0                    | 0                   | 0                    |
| <b>seq1811</b> | Firmicutes    | Clostridia   | 0                   | 0                    | 0                   | 0                    |
| <b>seq749</b>  | Firmicutes    | Clostridia   | 11                  | 62                   | 0                   | 0                    |
| <b>seq798</b>  | Firmicutes    | Clostridia   | 0                   | 0                    | 0                   | 0                    |
| <b>seq1503</b> | Firmicutes    | Clostridia   | 0                   | 0                    | 0                   | 0                    |
| <b>seq1654</b> | Firmicutes    | Clostridia   | 0                   | 16                   | 0                   | 0                    |
| <b>seq1695</b> | Firmicutes    | Clostridia   | 0                   | 0                    | 0                   | 0                    |
| <b>seq639</b>  | Firmicutes    | Clostridia   | 0                   | 0                    | 0                   | 0                    |
| <b>seq650</b>  | Firmicutes    | Clostridia   | 0                   | 0                    | 0                   | 0                    |
| <b>seq1118</b> | Firmicutes    | Clostridia   | 32                  | 0                    | 0                   | 0                    |
| <b>seq1127</b> | Firmicutes    | Clostridia   | 0                   | 0                    | 0                   | 0                    |
| <b>seq89</b>   | Firmicutes    | Clostridia   | 115                 | 84                   | 0                   | 0                    |
| <b>seq164</b>  | Firmicutes    | Clostridia   | 127                 | 219                  | 0                   | 347                  |
| <b>seq213</b>  | Firmicutes    | Clostridia   | 0                   | 0                    | 0                   | 0                    |
| <b>seq498</b>  | Firmicutes    | Clostridia   | 0                   | 0                    | 0                   | 0                    |
| <b>seq504</b>  | Firmicutes    | Clostridia   | 0                   | 0                    | 0                   | 0                    |
| <b>seq580</b>  | Firmicutes    | Clostridia   | 0                   | 0                    | 0                   | 0                    |
| <b>seq752</b>  | Firmicutes    | Clostridia   | 0                   | 0                    | 0                   | 0                    |
| <b>seq827</b>  | Firmicutes    | Clostridia   | 0                   | 0                    | 0                   | 0                    |
| <b>seq847</b>  | Firmicutes    | Clostridia   | 0                   | 0                    | 0                   | 0                    |
| <b>seq865</b>  | Firmicutes    | Clostridia   | 0                   | 0                    | 0                   | 0                    |
| <b>seq992</b>  | Firmicutes    | Clostridia   | 0                   | 0                    | 0                   | 0                    |
| <b>seq1050</b> | Firmicutes    | Clostridia   | 0                   | 0                    | 0                   | 0                    |

Sequence Count Table

|                | <b>Phylum</b> | <b>Class</b> | <b>Subject26WK0</b> | <b>Subject26WK12</b> | <b>Subject14WK0</b> | <b>Subject14WK12</b> |
|----------------|---------------|--------------|---------------------|----------------------|---------------------|----------------------|
| <b>seq745</b>  | Firmicutes    | Clostridia   | 0                   | 0                    | 0                   | 0                    |
| <b>seq803</b>  | Firmicutes    | Clostridia   | 0                   | 0                    | 0                   | 0                    |
| <b>seq1526</b> | Firmicutes    | Clostridia   | 0                   | 0                    | 0                   | 0                    |
| <b>seq158</b>  | Firmicutes    | Clostridia   | 0                   | 21                   | 85                  | 22                   |
| <b>seq405</b>  | Firmicutes    | Clostridia   | 0                   | 0                    | 0                   | 0                    |
| <b>seq173</b>  | Firmicutes    | Clostridia   | 0                   | 0                    | 446                 | 97                   |
| <b>seq758</b>  | Firmicutes    | Clostridia   | 0                   | 0                    | 0                   | 0                    |
| <b>seq1296</b> | Firmicutes    | Clostridia   | 6                   | 5                    | 0                   | 0                    |
| <b>seq1581</b> | Firmicutes    | Clostridia   | 0                   | 0                    | 0                   | 0                    |
| <b>seq1071</b> | Firmicutes    | Clostridia   | 14                  | 20                   | 0                   | 0                    |
| <b>seq1811</b> | Firmicutes    | Clostridia   | 0                   | 0                    | 0                   | 0                    |
| <b>seq749</b>  | Firmicutes    | Clostridia   | 0                   | 0                    | 0                   | 7                    |
| <b>seq798</b>  | Firmicutes    | Clostridia   | 51                  | 0                    | 0                   | 0                    |
| <b>seq1503</b> | Firmicutes    | Clostridia   | 0                   | 0                    | 0                   | 0                    |
| <b>seq1654</b> | Firmicutes    | Clostridia   | 0                   | 0                    | 0                   | 0                    |
| <b>seq1695</b> | Firmicutes    | Clostridia   | 0                   | 0                    | 0                   | 0                    |
| <b>seq639</b>  | Firmicutes    | Clostridia   | 0                   | 0                    | 0                   | 0                    |
| <b>seq650</b>  | Firmicutes    | Clostridia   | 30                  | 16                   | 0                   | 23                   |
| <b>seq1118</b> | Firmicutes    | Clostridia   | 0                   | 0                    | 0                   | 0                    |
| <b>seq1127</b> | Firmicutes    | Clostridia   | 0                   | 0                    | 0                   | 0                    |
| <b>seq89</b>   | Firmicutes    | Clostridia   | 0                   | 320                  | 152                 | 155                  |
| <b>seq164</b>  | Firmicutes    | Clostridia   | 132                 | 877                  | 0                   | 0                    |
| <b>seq213</b>  | Firmicutes    | Clostridia   | 0                   | 0                    | 0                   | 0                    |
| <b>seq498</b>  | Firmicutes    | Clostridia   | 0                   | 211                  | 0                   | 0                    |
| <b>seq504</b>  | Firmicutes    | Clostridia   | 0                   | 0                    | 0                   | 0                    |
| <b>seq580</b>  | Firmicutes    | Clostridia   | 26                  | 72                   | 0                   | 0                    |
| <b>seq752</b>  | Firmicutes    | Clostridia   | 0                   | 0                    | 0                   | 0                    |
| <b>seq827</b>  | Firmicutes    | Clostridia   | 0                   | 0                    | 0                   | 0                    |
| <b>seq847</b>  | Firmicutes    | Clostridia   | 0                   | 21                   | 0                   | 0                    |
| <b>seq865</b>  | Firmicutes    | Clostridia   | 0                   | 0                    | 0                   | 0                    |
| <b>seq992</b>  | Firmicutes    | Clostridia   | 0                   | 0                    | 0                   | 0                    |
| <b>seq1050</b> | Firmicutes    | Clostridia   | 0                   | 0                    | 0                   | 0                    |

Sequence Count Table

|                | <b>Phylum</b> | <b>Class</b> | <b>Subject27WK0</b> | <b>Subject27WK12</b> | <b>Subject15WK0</b> | <b>Subject15WK12</b> |
|----------------|---------------|--------------|---------------------|----------------------|---------------------|----------------------|
| <b>seq745</b>  | Firmicutes    | Clostridia   | 0                   | 0                    | 0                   | 320                  |
| <b>seq803</b>  | Firmicutes    | Clostridia   | 0                   | 0                    | 0                   | 0                    |
| <b>seq1526</b> | Firmicutes    | Clostridia   | 0                   | 0                    | 0                   | 0                    |
| <b>seq158</b>  | Firmicutes    | Clostridia   | 192                 | 176                  | 37                  | 529                  |
| <b>seq405</b>  | Firmicutes    | Clostridia   | 0                   | 0                    | 0                   | 318                  |
| <b>seq173</b>  | Firmicutes    | Clostridia   | 0                   | 0                    | 384                 | 322                  |
| <b>seq758</b>  | Firmicutes    | Clostridia   | 0                   | 0                    | 0                   | 309                  |
| <b>seq1296</b> | Firmicutes    | Clostridia   | 0                   | 0                    | 0                   | 0                    |
| <b>seq1581</b> | Firmicutes    | Clostridia   | 0                   | 0                    | 0                   | 0                    |
| <b>seq1071</b> | Firmicutes    | Clostridia   | 0                   | 0                    | 0                   | 0                    |
| <b>seq1811</b> | Firmicutes    | Clostridia   | 0                   | 0                    | 0                   | 0                    |
| <b>seq749</b>  | Firmicutes    | Clostridia   | 0                   | 0                    | 0                   | 0                    |
| <b>seq798</b>  | Firmicutes    | Clostridia   | 0                   | 5                    | 0                   | 0                    |
| <b>seq1503</b> | Firmicutes    | Clostridia   | 0                   | 0                    | 0                   | 0                    |
| <b>seq1654</b> | Firmicutes    | Clostridia   | 0                   | 0                    | 0                   | 0                    |
| <b>seq1695</b> | Firmicutes    | Clostridia   | 0                   | 0                    | 0                   | 0                    |
| <b>seq639</b>  | Firmicutes    | Clostridia   | 0                   | 0                    | 15                  | 0                    |
| <b>seq650</b>  | Firmicutes    | Clostridia   | 0                   | 0                    | 0                   | 0                    |
| <b>seq1118</b> | Firmicutes    | Clostridia   | 0                   | 0                    | 0                   | 0                    |
| <b>seq1127</b> | Firmicutes    | Clostridia   | 0                   | 0                    | 0                   | 0                    |
| <b>seq89</b>   | Firmicutes    | Clostridia   | 0                   | 0                    | 251                 | 428                  |
| <b>seq164</b>  | Firmicutes    | Clostridia   | 0                   | 0                    | 0                   | 0                    |
| <b>seq213</b>  | Firmicutes    | Clostridia   | 379                 | 463                  | 0                   | 0                    |
| <b>seq498</b>  | Firmicutes    | Clostridia   | 0                   | 0                    | 0                   | 0                    |
| <b>seq504</b>  | Firmicutes    | Clostridia   | 0                   | 0                    | 0                   | 0                    |
| <b>seq580</b>  | Firmicutes    | Clostridia   | 0                   | 0                    | 0                   | 0                    |
| <b>seq752</b>  | Firmicutes    | Clostridia   | 0                   | 0                    | 0                   | 0                    |
| <b>seq827</b>  | Firmicutes    | Clostridia   | 0                   | 0                    | 0                   | 0                    |
| <b>seq847</b>  | Firmicutes    | Clostridia   | 11                  | 0                    | 0                   | 0                    |
| <b>seq865</b>  | Firmicutes    | Clostridia   | 0                   | 0                    | 0                   | 0                    |
| <b>seq992</b>  | Firmicutes    | Clostridia   | 0                   | 0                    | 0                   | 0                    |
| <b>seq1050</b> | Firmicutes    | Clostridia   | 0                   | 0                    | 0                   | 0                    |

Sequence Count Table

|                | <b>Phylum</b> | <b>Class</b> | <b>Δ</b> |  |  |  |
|----------------|---------------|--------------|----------|--|--|--|
| <b>seq745</b>  | Firmicutes    | Clostridia   |          |  |  |  |
| <b>seq803</b>  | Firmicutes    | Clostridia   |          |  |  |  |
| <b>seq1526</b> | Firmicutes    | Clostridia   |          |  |  |  |
| <b>seq158</b>  | Firmicutes    | Clostridia   |          |  |  |  |
| <b>seq405</b>  | Firmicutes    | Clostridia   |          |  |  |  |
| <b>seq173</b>  | Firmicutes    | Clostridia   |          |  |  |  |
| <b>seq758</b>  | Firmicutes    | Clostridia   |          |  |  |  |
| <b>seq1296</b> | Firmicutes    | Clostridia   |          |  |  |  |
| <b>seq1581</b> | Firmicutes    | Clostridia   |          |  |  |  |
| <b>seq1071</b> | Firmicutes    | Clostridia   |          |  |  |  |
| <b>seq1811</b> | Firmicutes    | Clostridia   |          |  |  |  |
| <b>seq749</b>  | Firmicutes    | Clostridia   |          |  |  |  |
| <b>seq798</b>  | Firmicutes    | Clostridia   |          |  |  |  |
| <b>seq1503</b> | Firmicutes    | Clostridia   |          |  |  |  |
| <b>seq1654</b> | Firmicutes    | Clostridia   |          |  |  |  |
| <b>seq1695</b> | Firmicutes    | Clostridia   |          |  |  |  |
| <b>seq639</b>  | Firmicutes    | Clostridia   |          |  |  |  |
| <b>seq650</b>  | Firmicutes    | Clostridia   |          |  |  |  |
| <b>seq1118</b> | Firmicutes    | Clostridia   |          |  |  |  |
| <b>seq1127</b> | Firmicutes    | Clostridia   |          |  |  |  |
| <b>seq89</b>   | Firmicutes    | Clostridia   |          |  |  |  |
| <b>seq164</b>  | Firmicutes    | Clostridia   |          |  |  |  |
| <b>seq213</b>  | Firmicutes    | Clostridia   |          |  |  |  |
| <b>seq498</b>  | Firmicutes    | Clostridia   |          |  |  |  |
| <b>seq504</b>  | Firmicutes    | Clostridia   |          |  |  |  |
| <b>seq580</b>  | Firmicutes    | Clostridia   |          |  |  |  |
| <b>seq752</b>  | Firmicutes    | Clostridia   |          |  |  |  |
| <b>seq827</b>  | Firmicutes    | Clostridia   |          |  |  |  |
| <b>seq847</b>  | Firmicutes    | Clostridia   |          |  |  |  |
| <b>seq865</b>  | Firmicutes    | Clostridia   |          |  |  |  |
| <b>seq992</b>  | Firmicutes    | Clostridia   |          |  |  |  |
| <b>seq1050</b> | Firmicutes    | Clostridia   |          |  |  |  |

Sequence Count Table

|                | <b>Phylum</b> | <b>Class</b> | <b>Order</b>  | <b>Family</b>   |
|----------------|---------------|--------------|---------------|-----------------|
| <b>seq1093</b> | Firmicutes    | Clostridia   | Clostridiales | Ruminococcaceae |
| <b>seq1314</b> | Firmicutes    | Clostridia   | Clostridiales | Ruminococcaceae |
| <b>seq1327</b> | Firmicutes    | Clostridia   | Clostridiales | Ruminococcaceae |
| <b>seq1329</b> | Firmicutes    | Clostridia   | Clostridiales | Ruminococcaceae |
| <b>seq1376</b> | Firmicutes    | Clostridia   | Clostridiales | Ruminococcaceae |
| <b>seq1558</b> | Firmicutes    | Clostridia   | Clostridiales | Ruminococcaceae |
| <b>seq1614</b> | Firmicutes    | Clostridia   | Clostridiales | Ruminococcaceae |
| <b>seq74</b>   | Firmicutes    | Clostridia   | Clostridiales | Ruminococcaceae |
| <b>seq602</b>  | Firmicutes    | Clostridia   | Clostridiales | Ruminococcaceae |
| <b>seq974</b>  | Firmicutes    | Clostridia   | Clostridiales | Ruminococcaceae |
| <b>seq1160</b> | Firmicutes    | Clostridia   | Clostridiales | Ruminococcaceae |
| <b>seq1613</b> | Firmicutes    | Clostridia   | Clostridiales | Ruminococcaceae |
| <b>seq1785</b> | Firmicutes    | Clostridia   | Clostridiales | Ruminococcaceae |
| <b>seq1102</b> | Firmicutes    | Clostridia   | Clostridiales | Ruminococcaceae |
| <b>seq1319</b> | Firmicutes    | Clostridia   | Clostridiales | Ruminococcaceae |
| <b>seq1619</b> | Firmicutes    | Clostridia   | Clostridiales | Ruminococcaceae |
| <b>seq550</b>  | Firmicutes    | Clostridia   | Clostridiales | Ruminococcaceae |
| <b>seq664</b>  | Firmicutes    | Clostridia   | Clostridiales | Ruminococcaceae |
| <b>seq5</b>    | Firmicutes    | Clostridia   | Clostridiales | Ruminococcaceae |
| <b>seq7</b>    | Firmicutes    | Clostridia   | Clostridiales | Ruminococcaceae |
| <b>seq42</b>   | Firmicutes    | Clostridia   | Clostridiales | Ruminococcaceae |
| <b>seq91</b>   | Firmicutes    | Clostridia   | Clostridiales | Ruminococcaceae |
| <b>seq96</b>   | Firmicutes    | Clostridia   | Clostridiales | Ruminococcaceae |
| <b>seq133</b>  | Firmicutes    | Clostridia   | Clostridiales | Ruminococcaceae |
| <b>seq275</b>  | Firmicutes    | Clostridia   | Clostridiales | Ruminococcaceae |
| <b>seq326</b>  | Firmicutes    | Clostridia   | Clostridiales | Ruminococcaceae |
| <b>seq458</b>  | Firmicutes    | Clostridia   | Clostridiales | Ruminococcaceae |
| <b>seq511</b>  | Firmicutes    | Clostridia   | Clostridiales | Ruminococcaceae |
| <b>seq521</b>  | Firmicutes    | Clostridia   | Clostridiales | Ruminococcaceae |
| <b>seq645</b>  | Firmicutes    | Clostridia   | Clostridiales | Ruminococcaceae |
| <b>seq675</b>  | Firmicutes    | Clostridia   | Clostridiales | Ruminococcaceae |
| <b>seq720</b>  | Firmicutes    | Clostridia   | Clostridiales | Ruminococcaceae |

Sequence Count Table

|                | <b>Phylum</b> | <b>Class</b> | <b>Genus</b>           | <b>Species</b> |
|----------------|---------------|--------------|------------------------|----------------|
| <b>seq1093</b> | Firmicutes    | Clostridia   | Butyricoccus           |                |
| <b>seq1314</b> | Firmicutes    | Clostridia   | Butyricoccus           |                |
| <b>seq1327</b> | Firmicutes    | Clostridia   | Butyricoccus           |                |
| <b>seq1329</b> | Firmicutes    | Clostridia   | Butyricoccus           | pullicaecorum  |
| <b>seq1376</b> | Firmicutes    | Clostridia   | Butyricoccus           |                |
| <b>seq1558</b> | Firmicutes    | Clostridia   | Butyricoccus           |                |
| <b>seq1614</b> | Firmicutes    | Clostridia   | Butyricoccus           |                |
| <b>seq74</b>   | Firmicutes    | Clostridia   | CAG-352                |                |
| <b>seq602</b>  | Firmicutes    | Clostridia   | Candidatus_Soleaferrea |                |
| <b>seq974</b>  | Firmicutes    | Clostridia   | Candidatus_Soleaferrea |                |
| <b>seq1160</b> | Firmicutes    | Clostridia   | Candidatus_Soleaferrea |                |
| <b>seq1613</b> | Firmicutes    | Clostridia   | Candidatus_Soleaferrea |                |
| <b>seq1785</b> | Firmicutes    | Clostridia   | Candidatus_Soleaferrea |                |
| <b>seq1102</b> | Firmicutes    | Clostridia   | Caproiciproducens      |                |
| <b>seq1319</b> | Firmicutes    | Clostridia   | Caproiciproducens      |                |
| <b>seq1619</b> | Firmicutes    | Clostridia   | Caproiciproducens      |                |
| <b>seq550</b>  | Firmicutes    | Clostridia   | DTU089                 |                |
| <b>seq664</b>  | Firmicutes    | Clostridia   | DTU089                 |                |
| <b>seq5</b>    | Firmicutes    | Clostridia   | Faecalibacterium       |                |
| <b>seq7</b>    | Firmicutes    | Clostridia   | Faecalibacterium       | prausnitzii    |
| <b>seq42</b>   | Firmicutes    | Clostridia   | Faecalibacterium       | CM04-06        |
| <b>seq91</b>   | Firmicutes    | Clostridia   | Faecalibacterium       |                |
| <b>seq96</b>   | Firmicutes    | Clostridia   | Faecalibacterium       | prausnitzii    |
| <b>seq133</b>  | Firmicutes    | Clostridia   | Faecalibacterium       | prausnitzii    |
| <b>seq275</b>  | Firmicutes    | Clostridia   | Faecalibacterium       |                |
| <b>seq326</b>  | Firmicutes    | Clostridia   | Faecalibacterium       |                |
| <b>seq458</b>  | Firmicutes    | Clostridia   | Faecalibacterium       |                |
| <b>seq511</b>  | Firmicutes    | Clostridia   | Faecalibacterium       |                |
| <b>seq521</b>  | Firmicutes    | Clostridia   | Faecalibacterium       |                |
| <b>seq645</b>  | Firmicutes    | Clostridia   | Faecalibacterium       |                |
| <b>seq675</b>  | Firmicutes    | Clostridia   | Faecalibacterium       |                |
| <b>seq720</b>  | Firmicutes    | Clostridia   | Faecalibacterium       |                |

Sequence Count Table

|                | <b>Phylum</b> | <b>Class</b> | <b>Subject34WK0</b> | <b>Subject34WK12</b> | <b>Subject16WK0</b> | <b>Subject16WK12</b> |
|----------------|---------------|--------------|---------------------|----------------------|---------------------|----------------------|
| <b>seq1093</b> | Firmicutes    | Clostridia   | 0                   | 0                    | 0                   | 0                    |
| <b>seq1314</b> | Firmicutes    | Clostridia   | 0                   | 0                    | 0                   | 0                    |
| <b>seq1327</b> | Firmicutes    | Clostridia   | 0                   | 0                    | 0                   | 0                    |
| <b>seq1329</b> | Firmicutes    | Clostridia   | 0                   | 0                    | 0                   | 0                    |
| <b>seq1376</b> | Firmicutes    | Clostridia   | 0                   | 0                    | 0                   | 0                    |
| <b>seq1558</b> | Firmicutes    | Clostridia   | 0                   | 0                    | 0                   | 0                    |
| <b>seq1614</b> | Firmicutes    | Clostridia   | 0                   | 0                    | 0                   | 0                    |
| <b>seq74</b>   | Firmicutes    | Clostridia   | 0                   | 0                    | 0                   | 0                    |
| <b>seq602</b>  | Firmicutes    | Clostridia   | 0                   | 0                    | 0                   | 9                    |
| <b>seq974</b>  | Firmicutes    | Clostridia   | 0                   | 0                    | 0                   | 0                    |
| <b>seq1160</b> | Firmicutes    | Clostridia   | 0                   | 0                    | 0                   | 0                    |
| <b>seq1613</b> | Firmicutes    | Clostridia   | 0                   | 0                    | 0                   | 0                    |
| <b>seq1785</b> | Firmicutes    | Clostridia   | 0                   | 0                    | 0                   | 0                    |
| <b>seq1102</b> | Firmicutes    | Clostridia   | 0                   | 0                    | 7                   | 0                    |
| <b>seq1319</b> | Firmicutes    | Clostridia   | 0                   | 0                    | 0                   | 0                    |
| <b>seq1619</b> | Firmicutes    | Clostridia   | 0                   | 0                    | 0                   | 0                    |
| <b>seq550</b>  | Firmicutes    | Clostridia   | 0                   | 0                    | 0                   | 0                    |
| <b>seq664</b>  | Firmicutes    | Clostridia   | 0                   | 0                    | 0                   | 0                    |
| <b>seq5</b>    | Firmicutes    | Clostridia   | 169                 | 2960                 | 2891                | 2274                 |
| <b>seq7</b>    | Firmicutes    | Clostridia   | 67                  | 83                   | 2414                | 3259                 |
| <b>seq42</b>   | Firmicutes    | Clostridia   | 86                  | 246                  | 473                 | 477                  |
| <b>seq91</b>   | Firmicutes    | Clostridia   | 15                  | 74                   | 624                 | 882                  |
| <b>seq96</b>   | Firmicutes    | Clostridia   | 0                   | 0                    | 1353                | 2265                 |
| <b>seq133</b>  | Firmicutes    | Clostridia   | 64                  | 68                   | 264                 | 310                  |
| <b>seq275</b>  | Firmicutes    | Clostridia   | 0                   | 0                    | 0                   | 0                    |
| <b>seq326</b>  | Firmicutes    | Clostridia   | 0                   | 0                    | 0                   | 0                    |
| <b>seq458</b>  | Firmicutes    | Clostridia   | 0                   | 0                    | 0                   | 0                    |
| <b>seq511</b>  | Firmicutes    | Clostridia   | 0                   | 0                    | 0                   | 0                    |
| <b>seq521</b>  | Firmicutes    | Clostridia   | 0                   | 0                    | 87                  | 430                  |
| <b>seq645</b>  | Firmicutes    | Clostridia   | 0                   | 0                    | 0                   | 0                    |
| <b>seq675</b>  | Firmicutes    | Clostridia   | 0                   | 0                    | 198                 | 215                  |
| <b>seq720</b>  | Firmicutes    | Clostridia   | 0                   | 0                    | 0                   | 0                    |



Sequence Count Table

|                | <b>Phylum</b> | <b>Class</b> | <b>Subject17WK0</b> | <b>Subject17WK12</b> | <b>Subject1WK0</b> | <b>Subject1WK12</b> |
|----------------|---------------|--------------|---------------------|----------------------|--------------------|---------------------|
| <b>seq1093</b> | Firmicutes    | Clostridia   | 0                   | 0                    | 0                  | 0                   |
| <b>seq1314</b> | Firmicutes    | Clostridia   | 0                   | 0                    | 0                  | 0                   |
| <b>seq1327</b> | Firmicutes    | Clostridia   | 0                   | 0                    | 0                  | 0                   |
| <b>seq1329</b> | Firmicutes    | Clostridia   | 0                   | 0                    | 0                  | 0                   |
| <b>seq1376</b> | Firmicutes    | Clostridia   | 0                   | 0                    | 0                  | 0                   |
| <b>seq1558</b> | Firmicutes    | Clostridia   | 0                   | 0                    | 0                  | 0                   |
| <b>seq1614</b> | Firmicutes    | Clostridia   | 0                   | 18                   | 0                  | 0                   |
| <b>seq74</b>   | Firmicutes    | Clostridia   | 0                   | 0                    | 0                  | 0                   |
| <b>seq602</b>  | Firmicutes    | Clostridia   | 0                   | 0                    | 17                 | 8                   |
| <b>seq974</b>  | Firmicutes    | Clostridia   | 0                   | 0                    | 0                  | 0                   |
| <b>seq1160</b> | Firmicutes    | Clostridia   | 0                   | 0                    | 0                  | 0                   |
| <b>seq1613</b> | Firmicutes    | Clostridia   | 18                  | 0                    | 0                  | 0                   |
| <b>seq1785</b> | Firmicutes    | Clostridia   | 0                   | 6                    | 0                  | 0                   |
| <b>seq1102</b> | Firmicutes    | Clostridia   | 18                  | 6                    | 0                  | 0                   |
| <b>seq1319</b> | Firmicutes    | Clostridia   | 24                  | 9                    | 0                  | 0                   |
| <b>seq1619</b> | Firmicutes    | Clostridia   | 0                   | 0                    | 0                  | 0                   |
| <b>seq550</b>  | Firmicutes    | Clostridia   | 37                  | 67                   | 0                  | 0                   |
| <b>seq664</b>  | Firmicutes    | Clostridia   | 0                   | 0                    | 73                 | 74                  |
| <b>seq5</b>    | Firmicutes    | Clostridia   | 3237                | 7846                 | 1486               | 1352                |
| <b>seq7</b>    | Firmicutes    | Clostridia   | 2840                | 10436                | 2177               | 1889                |
| <b>seq42</b>   | Firmicutes    | Clostridia   | 33                  | 162                  | 143                | 175                 |
| <b>seq91</b>   | Firmicutes    | Clostridia   | 102                 | 914                  | 0                  | 0                   |
| <b>seq96</b>   | Firmicutes    | Clostridia   | 101                 | 1925                 | 0                  | 0                   |
| <b>seq133</b>  | Firmicutes    | Clostridia   | 368                 | 987                  | 260                | 248                 |
| <b>seq275</b>  | Firmicutes    | Clostridia   | 1125                | 1542                 | 0                  | 0                   |
| <b>seq326</b>  | Firmicutes    | Clostridia   | 0                   | 0                    | 0                  | 0                   |
| <b>seq458</b>  | Firmicutes    | Clostridia   | 0                   | 0                    | 0                  | 0                   |
| <b>seq511</b>  | Firmicutes    | Clostridia   | 0                   | 0                    | 0                  | 0                   |
| <b>seq521</b>  | Firmicutes    | Clostridia   | 0                   | 0                    | 0                  | 0                   |
| <b>seq645</b>  | Firmicutes    | Clostridia   | 147                 | 326                  | 0                  | 0                   |
| <b>seq675</b>  | Firmicutes    | Clostridia   | 0                   | 0                    | 0                  | 0                   |
| <b>seq720</b>  | Firmicutes    | Clostridia   | 0                   | 0                    | 0                  | 0                   |

Sequence Count Table

|                | <b>Phylum</b> | <b>Class</b> | <b>Subject2WK0</b> | <b>Subject2WK12</b> | <b>Subject3WK0</b> | <b>Subject3WK12</b> |
|----------------|---------------|--------------|--------------------|---------------------|--------------------|---------------------|
| <b>seq1093</b> | Firmicutes    | Clostridia   | 0                  | 0                   | 0                  | 0                   |
| <b>seq1314</b> | Firmicutes    | Clostridia   | 0                  | 0                   | 0                  | 0                   |
| <b>seq1327</b> | Firmicutes    | Clostridia   | 0                  | 0                   | 0                  | 0                   |
| <b>seq1329</b> | Firmicutes    | Clostridia   | 0                  | 0                   | 51                 | 0                   |
| <b>seq1376</b> | Firmicutes    | Clostridia   | 0                  | 0                   | 0                  | 0                   |
| <b>seq1558</b> | Firmicutes    | Clostridia   | 0                  | 0                   | 0                  | 0                   |
| <b>seq1614</b> | Firmicutes    | Clostridia   | 0                  | 0                   | 0                  | 0                   |
| <b>seq74</b>   | Firmicutes    | Clostridia   | 0                  | 0                   | 0                  | 0                   |
| <b>seq602</b>  | Firmicutes    | Clostridia   | 11                 | 12                  | 0                  | 0                   |
| <b>seq974</b>  | Firmicutes    | Clostridia   | 11                 | 0                   | 36                 | 21                  |
| <b>seq1160</b> | Firmicutes    | Clostridia   | 0                  | 0                   | 0                  | 0                   |
| <b>seq1613</b> | Firmicutes    | Clostridia   | 0                  | 0                   | 0                  | 0                   |
| <b>seq1785</b> | Firmicutes    | Clostridia   | 0                  | 0                   | 0                  | 0                   |
| <b>seq1102</b> | Firmicutes    | Clostridia   | 0                  | 0                   | 0                  | 0                   |
| <b>seq1319</b> | Firmicutes    | Clostridia   | 0                  | 0                   | 0                  | 0                   |
| <b>seq1619</b> | Firmicutes    | Clostridia   | 0                  | 0                   | 0                  | 0                   |
| <b>seq550</b>  | Firmicutes    | Clostridia   | 15                 | 0                   | 0                  | 0                   |
| <b>seq664</b>  | Firmicutes    | Clostridia   | 0                  | 0                   | 0                  | 0                   |
| <b>seq5</b>    | Firmicutes    | Clostridia   | 8641               | 12234               | 0                  | 7924                |
| <b>seq7</b>    | Firmicutes    | Clostridia   | 2709               | 4915                | 0                  | 0                   |
| <b>seq42</b>   | Firmicutes    | Clostridia   | 779                | 517                 | 0                  | 0                   |
| <b>seq91</b>   | Firmicutes    | Clostridia   | 435                | 680                 | 0                  | 0                   |
| <b>seq96</b>   | Firmicutes    | Clostridia   | 0                  | 0                   | 0                  | 0                   |
| <b>seq133</b>  | Firmicutes    | Clostridia   | 0                  | 0                   | 0                  | 0                   |
| <b>seq275</b>  | Firmicutes    | Clostridia   | 0                  | 0                   | 0                  | 0                   |
| <b>seq326</b>  | Firmicutes    | Clostridia   | 519                | 950                 | 0                  | 0                   |
| <b>seq458</b>  | Firmicutes    | Clostridia   | 0                  | 0                   | 0                  | 0                   |
| <b>seq511</b>  | Firmicutes    | Clostridia   | 0                  | 0                   | 0                  | 0                   |
| <b>seq521</b>  | Firmicutes    | Clostridia   | 0                  | 0                   | 0                  | 0                   |
| <b>seq645</b>  | Firmicutes    | Clostridia   | 0                  | 0                   | 0                  | 0                   |
| <b>seq675</b>  | Firmicutes    | Clostridia   | 0                  | 0                   | 0                  | 0                   |
| <b>seq720</b>  | Firmicutes    | Clostridia   | 0                  | 0                   | 0                  | 0                   |

Sequence Count Table

|                | <b>Phylum</b> | <b>Class</b> | <b>Subject4WK0</b> | <b>Subject4WK12</b> | <b>Subject5WK0</b> | <b>Subject5WK12</b> |
|----------------|---------------|--------------|--------------------|---------------------|--------------------|---------------------|
| <b>seq1093</b> | Firmicutes    | Clostridia   | 0                  | 108                 | 0                  | 0                   |
| <b>seq1314</b> | Firmicutes    | Clostridia   | 0                  | 0                   | 54                 | 0                   |
| <b>seq1327</b> | Firmicutes    | Clostridia   | 0                  | 0                   | 0                  | 0                   |
| <b>seq1329</b> | Firmicutes    | Clostridia   | 0                  | 0                   | 0                  | 0                   |
| <b>seq1376</b> | Firmicutes    | Clostridia   | 0                  | 0                   | 0                  | 0                   |
| <b>seq1558</b> | Firmicutes    | Clostridia   | 0                  | 0                   | 0                  | 0                   |
| <b>seq1614</b> | Firmicutes    | Clostridia   | 0                  | 0                   | 0                  | 0                   |
| <b>seq74</b>   | Firmicutes    | Clostridia   | 0                  | 0                   | 0                  | 0                   |
| <b>seq602</b>  | Firmicutes    | Clostridia   | 12                 | 18                  | 0                  | 18                  |
| <b>seq974</b>  | Firmicutes    | Clostridia   | 0                  | 0                   | 0                  | 0                   |
| <b>seq1160</b> | Firmicutes    | Clostridia   | 0                  | 0                   | 0                  | 0                   |
| <b>seq1613</b> | Firmicutes    | Clostridia   | 0                  | 0                   | 0                  | 0                   |
| <b>seq1785</b> | Firmicutes    | Clostridia   | 0                  | 0                   | 0                  | 0                   |
| <b>seq1102</b> | Firmicutes    | Clostridia   | 0                  | 0                   | 9                  | 37                  |
| <b>seq1319</b> | Firmicutes    | Clostridia   | 0                  | 0                   | 0                  | 0                   |
| <b>seq1619</b> | Firmicutes    | Clostridia   | 0                  | 0                   | 0                  | 0                   |
| <b>seq550</b>  | Firmicutes    | Clostridia   | 15                 | 97                  | 14                 | 31                  |
| <b>seq664</b>  | Firmicutes    | Clostridia   | 0                  | 0                   | 0                  | 0                   |
| <b>seq5</b>    | Firmicutes    | Clostridia   | 6918               | 3621                | 11070              | 4100                |
| <b>seq7</b>    | Firmicutes    | Clostridia   | 1492               | 2498                | 0                  | 0                   |
| <b>seq42</b>   | Firmicutes    | Clostridia   | 3331               | 1489                | 842                | 211                 |
| <b>seq91</b>   | Firmicutes    | Clostridia   | 359                | 131                 | 0                  | 0                   |
| <b>seq96</b>   | Firmicutes    | Clostridia   | 0                  | 0                   | 0                  | 0                   |
| <b>seq133</b>  | Firmicutes    | Clostridia   | 118                | 255                 | 0                  | 0                   |
| <b>seq275</b>  | Firmicutes    | Clostridia   | 0                  | 0                   | 0                  | 0                   |
| <b>seq326</b>  | Firmicutes    | Clostridia   | 0                  | 0                   | 0                  | 0                   |
| <b>seq458</b>  | Firmicutes    | Clostridia   | 0                  | 0                   | 0                  | 0                   |
| <b>seq511</b>  | Firmicutes    | Clostridia   | 0                  | 0                   | 0                  | 0                   |
| <b>seq521</b>  | Firmicutes    | Clostridia   | 0                  | 0                   | 0                  | 0                   |
| <b>seq645</b>  | Firmicutes    | Clostridia   | 0                  | 0                   | 0                  | 0                   |
| <b>seq675</b>  | Firmicutes    | Clostridia   | 0                  | 0                   | 0                  | 0                   |
| <b>seq720</b>  | Firmicutes    | Clostridia   | 0                  | 0                   | 0                  | 0                   |

Sequence Count Table

|                | <b>Phylum</b> | <b>Class</b> | <b>Subject6WK0</b> | <b>Subject6WK12</b> | <b>Subject18WK0</b> | <b>Subject18WK12</b> |
|----------------|---------------|--------------|--------------------|---------------------|---------------------|----------------------|
| <b>seq1093</b> | Firmicutes    | Clostridia   | 0                  | 0                   | 0                   | 0                    |
| <b>seq1314</b> | Firmicutes    | Clostridia   | 0                  | 0                   | 0                   | 0                    |
| <b>seq1327</b> | Firmicutes    | Clostridia   | 0                  | 0                   | 0                   | 0                    |
| <b>seq1329</b> | Firmicutes    | Clostridia   | 0                  | 0                   | 0                   | 0                    |
| <b>seq1376</b> | Firmicutes    | Clostridia   | 0                  | 0                   | 0                   | 0                    |
| <b>seq1558</b> | Firmicutes    | Clostridia   | 0                  | 0                   | 0                   | 0                    |
| <b>seq1614</b> | Firmicutes    | Clostridia   | 0                  | 0                   | 0                   | 0                    |
| <b>seq74</b>   | Firmicutes    | Clostridia   | 0                  | 0                   | 0                   | 0                    |
| <b>seq602</b>  | Firmicutes    | Clostridia   | 5                  | 0                   | 54                  | 24                   |
| <b>seq974</b>  | Firmicutes    | Clostridia   | 0                  | 0                   | 0                   | 0                    |
| <b>seq1160</b> | Firmicutes    | Clostridia   | 0                  | 0                   | 0                   | 0                    |
| <b>seq1613</b> | Firmicutes    | Clostridia   | 0                  | 0                   | 0                   | 0                    |
| <b>seq1785</b> | Firmicutes    | Clostridia   | 0                  | 0                   | 0                   | 0                    |
| <b>seq1102</b> | Firmicutes    | Clostridia   | 0                  | 0                   | 0                   | 0                    |
| <b>seq1319</b> | Firmicutes    | Clostridia   | 0                  | 0                   | 0                   | 0                    |
| <b>seq1619</b> | Firmicutes    | Clostridia   | 0                  | 0                   | 0                   | 0                    |
| <b>seq550</b>  | Firmicutes    | Clostridia   | 26                 | 14                  | 38                  | 8                    |
| <b>seq664</b>  | Firmicutes    | Clostridia   | 0                  | 0                   | 0                   | 0                    |
| <b>seq5</b>    | Firmicutes    | Clostridia   | 2737               | 3094                | 7569                | 6123                 |
| <b>seq7</b>    | Firmicutes    | Clostridia   | 3953               | 2691                | 2826                | 3038                 |
| <b>seq42</b>   | Firmicutes    | Clostridia   | 296                | 339                 | 0                   | 0                    |
| <b>seq91</b>   | Firmicutes    | Clostridia   | 554                | 612                 | 0                   | 0                    |
| <b>seq96</b>   | Firmicutes    | Clostridia   | 1793               | 4116                | 0                   | 0                    |
| <b>seq133</b>  | Firmicutes    | Clostridia   | 0                  | 0                   | 571                 | 582                  |
| <b>seq275</b>  | Firmicutes    | Clostridia   | 0                  | 0                   | 0                   | 0                    |
| <b>seq326</b>  | Firmicutes    | Clostridia   | 0                  | 0                   | 0                   | 0                    |
| <b>seq458</b>  | Firmicutes    | Clostridia   | 0                  | 0                   | 0                   | 0                    |
| <b>seq511</b>  | Firmicutes    | Clostridia   | 0                  | 0                   | 0                   | 0                    |
| <b>seq521</b>  | Firmicutes    | Clostridia   | 0                  | 0                   | 0                   | 0                    |
| <b>seq645</b>  | Firmicutes    | Clostridia   | 0                  | 0                   | 0                   | 0                    |
| <b>seq675</b>  | Firmicutes    | Clostridia   | 0                  | 0                   | 0                   | 0                    |
| <b>seq720</b>  | Firmicutes    | Clostridia   | 0                  | 0                   | 0                   | 0                    |

Sequence Count Table

|                | <b>Phylum</b> | <b>Class</b> | <b>Subject19WK0</b> | <b>Subject19WK12</b> | <b>Subject20WK0</b> | <b>Subject20WK12</b> |
|----------------|---------------|--------------|---------------------|----------------------|---------------------|----------------------|
| <b>seq1093</b> | Firmicutes    | Clostridia   | 0                   | 0                    | 0                   | 0                    |
| <b>seq1314</b> | Firmicutes    | Clostridia   | 0                   | 0                    | 0                   | 0                    |
| <b>seq1327</b> | Firmicutes    | Clostridia   | 0                   | 0                    | 0                   | 0                    |
| <b>seq1329</b> | Firmicutes    | Clostridia   | 0                   | 0                    | 0                   | 0                    |
| <b>seq1376</b> | Firmicutes    | Clostridia   | 0                   | 0                    | 0                   | 0                    |
| <b>seq1558</b> | Firmicutes    | Clostridia   | 0                   | 0                    | 0                   | 0                    |
| <b>seq1614</b> | Firmicutes    | Clostridia   | 0                   | 0                    | 0                   | 0                    |
| <b>seq74</b>   | Firmicutes    | Clostridia   | 0                   | 0                    | 0                   | 0                    |
| <b>seq602</b>  | Firmicutes    | Clostridia   | 6                   | 6                    | 0                   | 0                    |
| <b>seq974</b>  | Firmicutes    | Clostridia   | 31                  | 25                   | 0                   | 0                    |
| <b>seq1160</b> | Firmicutes    | Clostridia   | 0                   | 0                    | 65                  | 25                   |
| <b>seq1613</b> | Firmicutes    | Clostridia   | 0                   | 0                    | 0                   | 0                    |
| <b>seq1785</b> | Firmicutes    | Clostridia   | 0                   | 0                    | 0                   | 0                    |
| <b>seq1102</b> | Firmicutes    | Clostridia   | 0                   | 0                    | 0                   | 0                    |
| <b>seq1319</b> | Firmicutes    | Clostridia   | 0                   | 0                    | 0                   | 0                    |
| <b>seq1619</b> | Firmicutes    | Clostridia   | 0                   | 0                    | 0                   | 18                   |
| <b>seq550</b>  | Firmicutes    | Clostridia   | 0                   | 0                    | 13                  | 0                    |
| <b>seq664</b>  | Firmicutes    | Clostridia   | 0                   | 0                    | 0                   | 0                    |
| <b>seq5</b>    | Firmicutes    | Clostridia   | 1097                | 1795                 | 573                 | 1042                 |
| <b>seq7</b>    | Firmicutes    | Clostridia   | 1830                | 795                  | 2580                | 2517                 |
| <b>seq42</b>   | Firmicutes    | Clostridia   | 1356                | 303                  | 1692                | 911                  |
| <b>seq91</b>   | Firmicutes    | Clostridia   | 0                   | 0                    | 402                 | 561                  |
| <b>seq96</b>   | Firmicutes    | Clostridia   | 0                   | 0                    | 847                 | 785                  |
| <b>seq133</b>  | Firmicutes    | Clostridia   | 0                   | 0                    | 0                   | 0                    |
| <b>seq275</b>  | Firmicutes    | Clostridia   | 0                   | 0                    | 0                   | 0                    |
| <b>seq326</b>  | Firmicutes    | Clostridia   | 0                   | 0                    | 0                   | 0                    |
| <b>seq458</b>  | Firmicutes    | Clostridia   | 0                   | 0                    | 0                   | 0                    |
| <b>seq511</b>  | Firmicutes    | Clostridia   | 0                   | 0                    | 0                   | 0                    |
| <b>seq521</b>  | Firmicutes    | Clostridia   | 0                   | 0                    | 0                   | 0                    |
| <b>seq645</b>  | Firmicutes    | Clostridia   | 0                   | 0                    | 0                   | 0                    |
| <b>seq675</b>  | Firmicutes    | Clostridia   | 0                   | 0                    | 0                   | 0                    |
| <b>seq720</b>  | Firmicutes    | Clostridia   | 0                   | 0                    | 0                   | 0                    |

Sequence Count Table

|                | <b>Phylum</b> | <b>Class</b> | <b>Subject7WK0</b> | <b>Subject7WK12</b> | <b>Subject21WK0</b> | <b>Subject21WK12</b> |
|----------------|---------------|--------------|--------------------|---------------------|---------------------|----------------------|
| <b>seq1093</b> | Firmicutes    | Clostridia   | 0                  | 0                   | 0                   | 0                    |
| <b>seq1314</b> | Firmicutes    | Clostridia   | 0                  | 0                   | 0                   | 0                    |
| <b>seq1327</b> | Firmicutes    | Clostridia   | 0                  | 0                   | 0                   | 0                    |
| <b>seq1329</b> | Firmicutes    | Clostridia   | 0                  | 0                   | 0                   | 0                    |
| <b>seq1376</b> | Firmicutes    | Clostridia   | 0                  | 0                   | 0                   | 0                    |
| <b>seq1558</b> | Firmicutes    | Clostridia   | 0                  | 0                   | 0                   | 0                    |
| <b>seq1614</b> | Firmicutes    | Clostridia   | 0                  | 0                   | 0                   | 0                    |
| <b>seq74</b>   | Firmicutes    | Clostridia   | 0                  | 0                   | 0                   | 0                    |
| <b>seq602</b>  | Firmicutes    | Clostridia   | 57                 | 25                  | 10                  | 43                   |
| <b>seq974</b>  | Firmicutes    | Clostridia   | 0                  | 9                   | 0                   | 0                    |
| <b>seq1160</b> | Firmicutes    | Clostridia   | 0                  | 0                   | 0                   | 0                    |
| <b>seq1613</b> | Firmicutes    | Clostridia   | 0                  | 0                   | 0                   | 0                    |
| <b>seq1785</b> | Firmicutes    | Clostridia   | 0                  | 0                   | 0                   | 0                    |
| <b>seq1102</b> | Firmicutes    | Clostridia   | 0                  | 0                   | 0                   | 0                    |
| <b>seq1319</b> | Firmicutes    | Clostridia   | 0                  | 6                   | 0                   | 0                    |
| <b>seq1619</b> | Firmicutes    | Clostridia   | 0                  | 0                   | 0                   | 0                    |
| <b>seq550</b>  | Firmicutes    | Clostridia   | 27                 | 16                  | 0                   | 0                    |
| <b>seq664</b>  | Firmicutes    | Clostridia   | 0                  | 0                   | 0                   | 0                    |
| <b>seq5</b>    | Firmicutes    | Clostridia   | 1805               | 1747                | 13965               | 180                  |
| <b>seq7</b>    | Firmicutes    | Clostridia   | 7409               | 4869                | 0                   | 0                    |
| <b>seq42</b>   | Firmicutes    | Clostridia   | 893                | 6088                | 0                   | 0                    |
| <b>seq91</b>   | Firmicutes    | Clostridia   | 661                | 108                 | 0                   | 0                    |
| <b>seq96</b>   | Firmicutes    | Clostridia   | 0                  | 0                   | 0                   | 0                    |
| <b>seq133</b>  | Firmicutes    | Clostridia   | 0                  | 0                   | 0                   | 0                    |
| <b>seq275</b>  | Firmicutes    | Clostridia   | 0                  | 0                   | 0                   | 0                    |
| <b>seq326</b>  | Firmicutes    | Clostridia   | 166                | 128                 | 0                   | 0                    |
| <b>seq458</b>  | Firmicutes    | Clostridia   | 0                  | 0                   | 0                   | 0                    |
| <b>seq511</b>  | Firmicutes    | Clostridia   | 0                  | 0                   | 0                   | 0                    |
| <b>seq521</b>  | Firmicutes    | Clostridia   | 0                  | 0                   | 0                   | 0                    |
| <b>seq645</b>  | Firmicutes    | Clostridia   | 0                  | 0                   | 0                   | 0                    |
| <b>seq675</b>  | Firmicutes    | Clostridia   | 0                  | 0                   | 0                   | 0                    |
| <b>seq720</b>  | Firmicutes    | Clostridia   | 0                  | 0                   | 0                   | 0                    |

Sequence Count Table

|                | <b>Phylum</b> | <b>Class</b> | <b>Subject8WK0</b> | <b>Subject8WK12</b> | <b>Subject9WK0</b> | <b>Subject9WK12</b> |
|----------------|---------------|--------------|--------------------|---------------------|--------------------|---------------------|
| <b>seq1093</b> | Firmicutes    | Clostridia   | 0                  | 0                   | 0                  | 0                   |
| <b>seq1314</b> | Firmicutes    | Clostridia   | 0                  | 0                   | 0                  | 0                   |
| <b>seq1327</b> | Firmicutes    | Clostridia   | 0                  | 0                   | 0                  | 0                   |
| <b>seq1329</b> | Firmicutes    | Clostridia   | 0                  | 0                   | 0                  | 0                   |
| <b>seq1376</b> | Firmicutes    | Clostridia   | 0                  | 0                   | 0                  | 0                   |
| <b>seq1558</b> | Firmicutes    | Clostridia   | 0                  | 0                   | 0                  | 0                   |
| <b>seq1614</b> | Firmicutes    | Clostridia   | 0                  | 0                   | 0                  | 0                   |
| <b>seq74</b>   | Firmicutes    | Clostridia   | 0                  | 0                   | 0                  | 0                   |
| <b>seq602</b>  | Firmicutes    | Clostridia   | 14                 | 9                   | 12                 | 0                   |
| <b>seq974</b>  | Firmicutes    | Clostridia   | 0                  | 8                   | 0                  | 3                   |
| <b>seq1160</b> | Firmicutes    | Clostridia   | 0                  | 0                   | 0                  | 0                   |
| <b>seq1613</b> | Firmicutes    | Clostridia   | 0                  | 0                   | 0                  | 0                   |
| <b>seq1785</b> | Firmicutes    | Clostridia   | 0                  | 0                   | 0                  | 0                   |
| <b>seq1102</b> | Firmicutes    | Clostridia   | 0                  | 0                   | 0                  | 0                   |
| <b>seq1319</b> | Firmicutes    | Clostridia   | 0                  | 0                   | 0                  | 0                   |
| <b>seq1619</b> | Firmicutes    | Clostridia   | 0                  | 0                   | 0                  | 0                   |
| <b>seq550</b>  | Firmicutes    | Clostridia   | 0                  | 0                   | 0                  | 0                   |
| <b>seq664</b>  | Firmicutes    | Clostridia   | 0                  | 0                   | 27                 | 0                   |
| <b>seq5</b>    | Firmicutes    | Clostridia   | 4285               | 5123                | 2632               | 220                 |
| <b>seq7</b>    | Firmicutes    | Clostridia   | 2525               | 4182                | 0                  | 0                   |
| <b>seq42</b>   | Firmicutes    | Clostridia   | 1880               | 2046                | 250                | 36                  |
| <b>seq91</b>   | Firmicutes    | Clostridia   | 216                | 228                 | 0                  | 0                   |
| <b>seq96</b>   | Firmicutes    | Clostridia   | 0                  | 0                   | 0                  | 0                   |
| <b>seq133</b>  | Firmicutes    | Clostridia   | 0                  | 0                   | 0                  | 0                   |
| <b>seq275</b>  | Firmicutes    | Clostridia   | 0                  | 0                   | 0                  | 0                   |
| <b>seq326</b>  | Firmicutes    | Clostridia   | 0                  | 0                   | 0                  | 0                   |
| <b>seq458</b>  | Firmicutes    | Clostridia   | 0                  | 0                   | 0                  | 0                   |
| <b>seq511</b>  | Firmicutes    | Clostridia   | 0                  | 0                   | 0                  | 0                   |
| <b>seq521</b>  | Firmicutes    | Clostridia   | 0                  | 0                   | 0                  | 0                   |
| <b>seq645</b>  | Firmicutes    | Clostridia   | 0                  | 0                   | 0                  | 0                   |
| <b>seq675</b>  | Firmicutes    | Clostridia   | 0                  | 0                   | 0                  | 0                   |
| <b>seq720</b>  | Firmicutes    | Clostridia   | 0                  | 0                   | 0                  | 0                   |

Sequence Count Table

|                | <b>Phylum</b> | <b>Class</b> | <b>Subject10WK0</b> | <b>Subject10WK12</b> | <b>Subject22WK0</b> | <b>Subject22WK12</b> |
|----------------|---------------|--------------|---------------------|----------------------|---------------------|----------------------|
| <b>seq1093</b> | Firmicutes    | Clostridia   | 0                   | 0                    | 0                   | 0                    |
| <b>seq1314</b> | Firmicutes    | Clostridia   | 0                   | 0                    | 0                   | 0                    |
| <b>seq1327</b> | Firmicutes    | Clostridia   | 0                   | 0                    | 0                   | 0                    |
| <b>seq1329</b> | Firmicutes    | Clostridia   | 0                   | 0                    | 0                   | 0                    |
| <b>seq1376</b> | Firmicutes    | Clostridia   | 0                   | 0                    | 0                   | 0                    |
| <b>seq1558</b> | Firmicutes    | Clostridia   | 0                   | 0                    | 0                   | 0                    |
| <b>seq1614</b> | Firmicutes    | Clostridia   | 0                   | 0                    | 0                   | 0                    |
| <b>seq74</b>   | Firmicutes    | Clostridia   | 0                   | 0                    | 3448                | 5783                 |
| <b>seq602</b>  | Firmicutes    | Clostridia   | 4                   | 0                    | 6                   | 0                    |
| <b>seq974</b>  | Firmicutes    | Clostridia   | 5                   | 0                    | 0                   | 0                    |
| <b>seq1160</b> | Firmicutes    | Clostridia   | 0                   | 0                    | 0                   | 0                    |
| <b>seq1613</b> | Firmicutes    | Clostridia   | 0                   | 0                    | 0                   | 0                    |
| <b>seq1785</b> | Firmicutes    | Clostridia   | 0                   | 0                    | 0                   | 2                    |
| <b>seq1102</b> | Firmicutes    | Clostridia   | 0                   | 0                    | 0                   | 0                    |
| <b>seq1319</b> | Firmicutes    | Clostridia   | 0                   | 0                    | 0                   | 0                    |
| <b>seq1619</b> | Firmicutes    | Clostridia   | 0                   | 0                    | 0                   | 0                    |
| <b>seq550</b>  | Firmicutes    | Clostridia   | 0                   | 0                    | 16                  | 25                   |
| <b>seq664</b>  | Firmicutes    | Clostridia   | 68                  | 28                   | 0                   | 0                    |
| <b>seq5</b>    | Firmicutes    | Clostridia   | 0                   | 0                    | 2952                | 2449                 |
| <b>seq7</b>    | Firmicutes    | Clostridia   | 0                   | 0                    | 2266                | 3362                 |
| <b>seq42</b>   | Firmicutes    | Clostridia   | 0                   | 0                    | 929                 | 519                  |
| <b>seq91</b>   | Firmicutes    | Clostridia   | 0                   | 0                    | 1090                | 1100                 |
| <b>seq96</b>   | Firmicutes    | Clostridia   | 0                   | 0                    | 0                   | 0                    |
| <b>seq133</b>  | Firmicutes    | Clostridia   | 0                   | 0                    | 0                   | 0                    |
| <b>seq275</b>  | Firmicutes    | Clostridia   | 0                   | 0                    | 0                   | 0                    |
| <b>seq326</b>  | Firmicutes    | Clostridia   | 0                   | 0                    | 0                   | 0                    |
| <b>seq458</b>  | Firmicutes    | Clostridia   | 0                   | 0                    | 0                   | 0                    |
| <b>seq511</b>  | Firmicutes    | Clostridia   | 0                   | 0                    | 0                   | 0                    |
| <b>seq521</b>  | Firmicutes    | Clostridia   | 0                   | 0                    | 0                   | 0                    |
| <b>seq645</b>  | Firmicutes    | Clostridia   | 0                   | 0                    | 0                   | 0                    |
| <b>seq675</b>  | Firmicutes    | Clostridia   | 0                   | 0                    | 0                   | 0                    |
| <b>seq720</b>  | Firmicutes    | Clostridia   | 0                   | 0                    | 0                   | 0                    |



Sequence Count Table

|                | <b>Phylum</b> | <b>Class</b> | <b>Subject23WK0</b> | <b>Subject23WK12</b> | <b>Subject24WK0</b> | <b>Subject24WK12</b> |
|----------------|---------------|--------------|---------------------|----------------------|---------------------|----------------------|
| <b>seq1093</b> | Firmicutes    | Clostridia   | 0                   | 0                    | 0                   | 0                    |
| <b>seq1314</b> | Firmicutes    | Clostridia   | 0                   | 0                    | 0                   | 0                    |
| <b>seq1327</b> | Firmicutes    | Clostridia   | 0                   | 0                    | 0                   | 0                    |
| <b>seq1329</b> | Firmicutes    | Clostridia   | 0                   | 0                    | 0                   | 0                    |
| <b>seq1376</b> | Firmicutes    | Clostridia   | 0                   | 0                    | 0                   | 0                    |
| <b>seq1558</b> | Firmicutes    | Clostridia   | 0                   | 0                    | 0                   | 0                    |
| <b>seq1614</b> | Firmicutes    | Clostridia   | 0                   | 0                    | 0                   | 0                    |
| <b>seq74</b>   | Firmicutes    | Clostridia   | 877                 | 6041                 | 0                   | 0                    |
| <b>seq602</b>  | Firmicutes    | Clostridia   | 4                   | 7                    | 6                   | 15                   |
| <b>seq974</b>  | Firmicutes    | Clostridia   | 0                   | 0                    | 0                   | 0                    |
| <b>seq1160</b> | Firmicutes    | Clostridia   | 0                   | 0                    | 0                   | 0                    |
| <b>seq1613</b> | Firmicutes    | Clostridia   | 0                   | 0                    | 0                   | 0                    |
| <b>seq1785</b> | Firmicutes    | Clostridia   | 0                   | 0                    | 0                   | 0                    |
| <b>seq1102</b> | Firmicutes    | Clostridia   | 0                   | 0                    | 0                   | 0                    |
| <b>seq1319</b> | Firmicutes    | Clostridia   | 0                   | 0                    | 0                   | 0                    |
| <b>seq1619</b> | Firmicutes    | Clostridia   | 0                   | 0                    | 0                   | 0                    |
| <b>seq550</b>  | Firmicutes    | Clostridia   | 0                   | 12                   | 49                  | 67                   |
| <b>seq664</b>  | Firmicutes    | Clostridia   | 11                  | 0                    | 0                   | 0                    |
| <b>seq5</b>    | Firmicutes    | Clostridia   | 505                 | 1292                 | 3424                | 3115                 |
| <b>seq7</b>    | Firmicutes    | Clostridia   | 876                 | 1107                 | 7301                | 8301                 |
| <b>seq42</b>   | Firmicutes    | Clostridia   | 1921                | 1352                 | 1924                | 819                  |
| <b>seq91</b>   | Firmicutes    | Clostridia   | 0                   | 0                    | 1336                | 901                  |
| <b>seq96</b>   | Firmicutes    | Clostridia   | 0                   | 0                    | 0                   | 0                    |
| <b>seq133</b>  | Firmicutes    | Clostridia   | 1267                | 2066                 | 0                   | 0                    |
| <b>seq275</b>  | Firmicutes    | Clostridia   | 0                   | 0                    | 0                   | 0                    |
| <b>seq326</b>  | Firmicutes    | Clostridia   | 0                   | 0                    | 0                   | 0                    |
| <b>seq458</b>  | Firmicutes    | Clostridia   | 0                   | 0                    | 0                   | 0                    |
| <b>seq511</b>  | Firmicutes    | Clostridia   | 0                   | 0                    | 0                   | 0                    |
| <b>seq521</b>  | Firmicutes    | Clostridia   | 0                   | 0                    | 0                   | 0                    |
| <b>seq645</b>  | Firmicutes    | Clostridia   | 0                   | 0                    | 0                   | 0                    |
| <b>seq675</b>  | Firmicutes    | Clostridia   | 0                   | 0                    | 0                   | 0                    |
| <b>seq720</b>  | Firmicutes    | Clostridia   | 174                 | 177                  | 0                   | 0                    |

Sequence Count Table

|                | <b>Phylum</b> | <b>Class</b> | <b>Subject11WK0</b> | <b>Subject11WK12</b> | <b>Subject12WK0</b> | <b>Subject12WK12</b> |
|----------------|---------------|--------------|---------------------|----------------------|---------------------|----------------------|
| <b>seq1093</b> | Firmicutes    | Clostridia   | 0                   | 0                    | 0                   | 0                    |
| <b>seq1314</b> | Firmicutes    | Clostridia   | 0                   | 0                    | 0                   | 0                    |
| <b>seq1327</b> | Firmicutes    | Clostridia   | 0                   | 0                    | 0                   | 0                    |
| <b>seq1329</b> | Firmicutes    | Clostridia   | 0                   | 0                    | 0                   | 0                    |
| <b>seq1376</b> | Firmicutes    | Clostridia   | 0                   | 0                    | 0                   | 0                    |
| <b>seq1558</b> | Firmicutes    | Clostridia   | 0                   | 0                    | 0                   | 0                    |
| <b>seq1614</b> | Firmicutes    | Clostridia   | 0                   | 0                    | 0                   | 0                    |
| <b>seq74</b>   | Firmicutes    | Clostridia   | 1423                | 0                    | 0                   | 0                    |
| <b>seq602</b>  | Firmicutes    | Clostridia   | 15                  | 0                    | 4                   | 11                   |
| <b>seq974</b>  | Firmicutes    | Clostridia   | 0                   | 0                    | 0                   | 0                    |
| <b>seq1160</b> | Firmicutes    | Clostridia   | 0                   | 0                    | 0                   | 0                    |
| <b>seq1613</b> | Firmicutes    | Clostridia   | 0                   | 0                    | 0                   | 0                    |
| <b>seq1785</b> | Firmicutes    | Clostridia   | 0                   | 0                    | 0                   | 0                    |
| <b>seq1102</b> | Firmicutes    | Clostridia   | 18                  | 0                    | 0                   | 0                    |
| <b>seq1319</b> | Firmicutes    | Clostridia   | 0                   | 0                    | 0                   | 0                    |
| <b>seq1619</b> | Firmicutes    | Clostridia   | 0                   | 0                    | 0                   | 0                    |
| <b>seq550</b>  | Firmicutes    | Clostridia   | 0                   | 0                    | 0                   | 0                    |
| <b>seq664</b>  | Firmicutes    | Clostridia   | 0                   | 0                    | 0                   | 0                    |
| <b>seq5</b>    | Firmicutes    | Clostridia   | 4281                | 2283                 | 2616                | 2429                 |
| <b>seq7</b>    | Firmicutes    | Clostridia   | 0                   | 0                    | 3862                | 3831                 |
| <b>seq42</b>   | Firmicutes    | Clostridia   | 0                   | 0                    | 1124                | 478                  |
| <b>seq91</b>   | Firmicutes    | Clostridia   | 0                   | 0                    | 1123                | 541                  |
| <b>seq96</b>   | Firmicutes    | Clostridia   | 0                   | 0                    | 0                   | 0                    |
| <b>seq133</b>  | Firmicutes    | Clostridia   | 0                   | 0                    | 184                 | 94                   |
| <b>seq275</b>  | Firmicutes    | Clostridia   | 0                   | 0                    | 0                   | 0                    |
| <b>seq326</b>  | Firmicutes    | Clostridia   | 0                   | 0                    | 0                   | 0                    |
| <b>seq458</b>  | Firmicutes    | Clostridia   | 0                   | 0                    | 680                 | 270                  |
| <b>seq511</b>  | Firmicutes    | Clostridia   | 0                   | 0                    | 153                 | 606                  |
| <b>seq521</b>  | Firmicutes    | Clostridia   | 0                   | 0                    | 0                   | 0                    |
| <b>seq645</b>  | Firmicutes    | Clostridia   | 0                   | 0                    | 0                   | 0                    |
| <b>seq675</b>  | Firmicutes    | Clostridia   | 0                   | 0                    | 0                   | 0                    |
| <b>seq720</b>  | Firmicutes    | Clostridia   | 0                   | 0                    | 0                   | 0                    |

Sequence Count Table

|                | <b>Phylum</b> | <b>Class</b> | <b>Subject25WK0</b> | <b>Subject25WK12</b> | <b>Subject38WK0</b> | <b>Subject38WK12</b> |
|----------------|---------------|--------------|---------------------|----------------------|---------------------|----------------------|
| <b>seq1093</b> | Firmicutes    | Clostridia   | 0                   | 0                    | 0                   | 0                    |
| <b>seq1314</b> | Firmicutes    | Clostridia   | 0                   | 0                    | 0                   | 0                    |
| <b>seq1327</b> | Firmicutes    | Clostridia   | 0                   | 0                    | 0                   | 0                    |
| <b>seq1329</b> | Firmicutes    | Clostridia   | 0                   | 0                    | 0                   | 0                    |
| <b>seq1376</b> | Firmicutes    | Clostridia   | 0                   | 0                    | 0                   | 0                    |
| <b>seq1558</b> | Firmicutes    | Clostridia   | 0                   | 0                    | 0                   | 0                    |
| <b>seq1614</b> | Firmicutes    | Clostridia   | 0                   | 0                    | 0                   | 0                    |
| <b>seq74</b>   | Firmicutes    | Clostridia   | 0                   | 0                    | 0                   | 0                    |
| <b>seq602</b>  | Firmicutes    | Clostridia   | 8                   | 0                    | 0                   | 0                    |
| <b>seq974</b>  | Firmicutes    | Clostridia   | 0                   | 0                    | 0                   | 0                    |
| <b>seq1160</b> | Firmicutes    | Clostridia   | 0                   | 0                    | 0                   | 0                    |
| <b>seq1613</b> | Firmicutes    | Clostridia   | 0                   | 0                    | 0                   | 0                    |
| <b>seq1785</b> | Firmicutes    | Clostridia   | 0                   | 0                    | 0                   | 0                    |
| <b>seq1102</b> | Firmicutes    | Clostridia   | 0                   | 0                    | 0                   | 0                    |
| <b>seq1319</b> | Firmicutes    | Clostridia   | 0                   | 2                    | 0                   | 0                    |
| <b>seq1619</b> | Firmicutes    | Clostridia   | 0                   | 0                    | 0                   | 0                    |
| <b>seq550</b>  | Firmicutes    | Clostridia   | 18                  | 0                    | 0                   | 0                    |
| <b>seq664</b>  | Firmicutes    | Clostridia   | 0                   | 0                    | 0                   | 0                    |
| <b>seq5</b>    | Firmicutes    | Clostridia   | 2559                | 40                   | 0                   | 0                    |
| <b>seq7</b>    | Firmicutes    | Clostridia   | 289                 | 54                   | 0                   | 0                    |
| <b>seq42</b>   | Firmicutes    | Clostridia   | 430                 | 31                   | 0                   | 0                    |
| <b>seq91</b>   | Firmicutes    | Clostridia   | 81                  | 0                    | 0                   | 0                    |
| <b>seq96</b>   | Firmicutes    | Clostridia   | 0                   | 0                    | 0                   | 0                    |
| <b>seq133</b>  | Firmicutes    | Clostridia   | 0                   | 0                    | 0                   | 0                    |
| <b>seq275</b>  | Firmicutes    | Clostridia   | 0                   | 0                    | 0                   | 0                    |
| <b>seq326</b>  | Firmicutes    | Clostridia   | 0                   | 0                    | 0                   | 0                    |
| <b>seq458</b>  | Firmicutes    | Clostridia   | 0                   | 0                    | 0                   | 0                    |
| <b>seq511</b>  | Firmicutes    | Clostridia   | 0                   | 0                    | 0                   | 0                    |
| <b>seq521</b>  | Firmicutes    | Clostridia   | 0                   | 0                    | 0                   | 0                    |
| <b>seq645</b>  | Firmicutes    | Clostridia   | 0                   | 0                    | 0                   | 0                    |
| <b>seq675</b>  | Firmicutes    | Clostridia   | 0                   | 0                    | 0                   | 0                    |
| <b>seq720</b>  | Firmicutes    | Clostridia   | 0                   | 0                    | 0                   | 0                    |

Sequence Count Table

|                | <b>Phylum</b> | <b>Class</b> | <b>Subject31WK0</b> | <b>Subject31WK12</b> | <b>Subject32WK0</b> | <b>Subject32WK12</b> |
|----------------|---------------|--------------|---------------------|----------------------|---------------------|----------------------|
| <b>seq1093</b> | Firmicutes    | Clostridia   | 0                   | 0                    | 0                   | 0                    |
| <b>seq1314</b> | Firmicutes    | Clostridia   | 0                   | 0                    | 0                   | 0                    |
| <b>seq1327</b> | Firmicutes    | Clostridia   | 0                   | 0                    | 0                   | 0                    |
| <b>seq1329</b> | Firmicutes    | Clostridia   | 0                   | 0                    | 0                   | 0                    |
| <b>seq1376</b> | Firmicutes    | Clostridia   | 0                   | 0                    | 0                   | 0                    |
| <b>seq1558</b> | Firmicutes    | Clostridia   | 0                   | 0                    | 23                  | 0                    |
| <b>seq1614</b> | Firmicutes    | Clostridia   | 0                   | 0                    | 0                   | 0                    |
| <b>seq74</b>   | Firmicutes    | Clostridia   | 0                   | 0                    | 0                   | 0                    |
| <b>seq602</b>  | Firmicutes    | Clostridia   | 0                   | 0                    | 6                   | 0                    |
| <b>seq974</b>  | Firmicutes    | Clostridia   | 0                   | 0                    | 0                   | 0                    |
| <b>seq1160</b> | Firmicutes    | Clostridia   | 0                   | 0                    | 0                   | 0                    |
| <b>seq1613</b> | Firmicutes    | Clostridia   | 0                   | 0                    | 0                   | 0                    |
| <b>seq1785</b> | Firmicutes    | Clostridia   | 0                   | 0                    | 0                   | 0                    |
| <b>seq1102</b> | Firmicutes    | Clostridia   | 0                   | 0                    | 0                   | 0                    |
| <b>seq1319</b> | Firmicutes    | Clostridia   | 0                   | 0                    | 0                   | 0                    |
| <b>seq1619</b> | Firmicutes    | Clostridia   | 0                   | 0                    | 0                   | 0                    |
| <b>seq550</b>  | Firmicutes    | Clostridia   | 0                   | 0                    | 6                   | 0                    |
| <b>seq664</b>  | Firmicutes    | Clostridia   | 0                   | 0                    | 0                   | 0                    |
| <b>seq5</b>    | Firmicutes    | Clostridia   | 0                   | 0                    | 722                 | 0                    |
| <b>seq7</b>    | Firmicutes    | Clostridia   | 0                   | 0                    | 0                   | 0                    |
| <b>seq42</b>   | Firmicutes    | Clostridia   | 0                   | 0                    | 1988                | 34                   |
| <b>seq91</b>   | Firmicutes    | Clostridia   | 0                   | 0                    | 0                   | 0                    |
| <b>seq96</b>   | Firmicutes    | Clostridia   | 0                   | 0                    | 0                   | 0                    |
| <b>seq133</b>  | Firmicutes    | Clostridia   | 0                   | 0                    | 0                   | 0                    |
| <b>seq275</b>  | Firmicutes    | Clostridia   | 0                   | 0                    | 0                   | 0                    |
| <b>seq326</b>  | Firmicutes    | Clostridia   | 0                   | 0                    | 182                 | 0                    |
| <b>seq458</b>  | Firmicutes    | Clostridia   | 0                   | 0                    | 0                   | 0                    |
| <b>seq511</b>  | Firmicutes    | Clostridia   | 0                   | 0                    | 0                   | 0                    |
| <b>seq521</b>  | Firmicutes    | Clostridia   | 0                   | 0                    | 0                   | 0                    |
| <b>seq645</b>  | Firmicutes    | Clostridia   | 0                   | 0                    | 0                   | 0                    |
| <b>seq675</b>  | Firmicutes    | Clostridia   | 0                   | 0                    | 0                   | 0                    |
| <b>seq720</b>  | Firmicutes    | Clostridia   | 0                   | 0                    | 0                   | 0                    |

Sequence Count Table

|                | <b>Phylum</b> | <b>Class</b> | <b>Subject13WK0</b> | <b>Subject13WK12</b> | <b>Subject39WK0</b> | <b>Subject39WK12</b> |
|----------------|---------------|--------------|---------------------|----------------------|---------------------|----------------------|
| <b>seq1093</b> | Firmicutes    | Clostridia   | 0                   | 0                    | 0                   | 0                    |
| <b>seq1314</b> | Firmicutes    | Clostridia   | 0                   | 0                    | 0                   | 0                    |
| <b>seq1327</b> | Firmicutes    | Clostridia   | 0                   | 0                    | 0                   | 0                    |
| <b>seq1329</b> | Firmicutes    | Clostridia   | 0                   | 0                    | 0                   | 0                    |
| <b>seq1376</b> | Firmicutes    | Clostridia   | 0                   | 0                    | 0                   | 45                   |
| <b>seq1558</b> | Firmicutes    | Clostridia   | 0                   | 0                    | 0                   | 0                    |
| <b>seq1614</b> | Firmicutes    | Clostridia   | 0                   | 0                    | 0                   | 0                    |
| <b>seq74</b>   | Firmicutes    | Clostridia   | 353                 | 2184                 | 0                   | 0                    |
| <b>seq602</b>  | Firmicutes    | Clostridia   | 18                  | 11                   | 0                   | 3                    |
| <b>seq974</b>  | Firmicutes    | Clostridia   | 0                   | 0                    | 0                   | 0                    |
| <b>seq1160</b> | Firmicutes    | Clostridia   | 0                   | 0                    | 0                   | 0                    |
| <b>seq1613</b> | Firmicutes    | Clostridia   | 0                   | 0                    | 0                   | 0                    |
| <b>seq1785</b> | Firmicutes    | Clostridia   | 0                   | 0                    | 0                   | 0                    |
| <b>seq1102</b> | Firmicutes    | Clostridia   | 0                   | 0                    | 0                   | 9                    |
| <b>seq1319</b> | Firmicutes    | Clostridia   | 4                   | 0                    | 0                   | 0                    |
| <b>seq1619</b> | Firmicutes    | Clostridia   | 0                   | 0                    | 0                   | 0                    |
| <b>seq550</b>  | Firmicutes    | Clostridia   | 0                   | 10                   | 0                   | 0                    |
| <b>seq664</b>  | Firmicutes    | Clostridia   | 0                   | 0                    | 0                   | 0                    |
| <b>seq5</b>    | Firmicutes    | Clostridia   | 1459                | 5414                 | 0                   | 558                  |
| <b>seq7</b>    | Firmicutes    | Clostridia   | 3594                | 1296                 | 0                   | 56                   |
| <b>seq42</b>   | Firmicutes    | Clostridia   | 436                 | 1790                 | 0                   | 0                    |
| <b>seq91</b>   | Firmicutes    | Clostridia   | 126                 | 157                  | 0                   | 0                    |
| <b>seq96</b>   | Firmicutes    | Clostridia   | 0                   | 0                    | 0                   | 0                    |
| <b>seq133</b>  | Firmicutes    | Clostridia   | 0                   | 0                    | 0                   | 0                    |
| <b>seq275</b>  | Firmicutes    | Clostridia   | 0                   | 0                    | 0                   | 0                    |
| <b>seq326</b>  | Firmicutes    | Clostridia   | 0                   | 0                    | 0                   | 0                    |
| <b>seq458</b>  | Firmicutes    | Clostridia   | 0                   | 0                    | 0                   | 0                    |
| <b>seq511</b>  | Firmicutes    | Clostridia   | 0                   | 0                    | 0                   | 0                    |
| <b>seq521</b>  | Firmicutes    | Clostridia   | 0                   | 0                    | 0                   | 0                    |
| <b>seq645</b>  | Firmicutes    | Clostridia   | 0                   | 0                    | 0                   | 0                    |
| <b>seq675</b>  | Firmicutes    | Clostridia   | 0                   | 0                    | 0                   | 0                    |
| <b>seq720</b>  | Firmicutes    | Clostridia   | 0                   | 0                    | 0                   | 0                    |

Sequence Count Table

|                | <b>Phylum</b> | <b>Class</b> | <b>Subject26WK0</b> | <b>Subject26WK12</b> | <b>Subject14WK0</b> | <b>Subject14WK12</b> |
|----------------|---------------|--------------|---------------------|----------------------|---------------------|----------------------|
| <b>seq1093</b> | Firmicutes    | Clostridia   | 0                   | 0                    | 0                   | 0                    |
| <b>seq1314</b> | Firmicutes    | Clostridia   | 0                   | 0                    | 0                   | 0                    |
| <b>seq1327</b> | Firmicutes    | Clostridia   | 0                   | 0                    | 0                   | 0                    |
| <b>seq1329</b> | Firmicutes    | Clostridia   | 0                   | 0                    | 0                   | 0                    |
| <b>seq1376</b> | Firmicutes    | Clostridia   | 0                   | 0                    | 0                   | 0                    |
| <b>seq1558</b> | Firmicutes    | Clostridia   | 0                   | 0                    | 0                   | 0                    |
| <b>seq1614</b> | Firmicutes    | Clostridia   | 0                   | 0                    | 0                   | 0                    |
| <b>seq74</b>   | Firmicutes    | Clostridia   | 0                   | 0                    | 0                   | 0                    |
| <b>seq602</b>  | Firmicutes    | Clostridia   | 10                  | 15                   | 0                   | 0                    |
| <b>seq974</b>  | Firmicutes    | Clostridia   | 0                   | 0                    | 0                   | 0                    |
| <b>seq1160</b> | Firmicutes    | Clostridia   | 0                   | 0                    | 0                   | 0                    |
| <b>seq1613</b> | Firmicutes    | Clostridia   | 0                   | 0                    | 0                   | 0                    |
| <b>seq1785</b> | Firmicutes    | Clostridia   | 0                   | 0                    | 0                   | 0                    |
| <b>seq1102</b> | Firmicutes    | Clostridia   | 0                   | 0                    | 0                   | 0                    |
| <b>seq1319</b> | Firmicutes    | Clostridia   | 0                   | 0                    | 0                   | 8                    |
| <b>seq1619</b> | Firmicutes    | Clostridia   | 0                   | 0                    | 0                   | 0                    |
| <b>seq550</b>  | Firmicutes    | Clostridia   | 0                   | 0                    | 17                  | 0                    |
| <b>seq664</b>  | Firmicutes    | Clostridia   | 98                  | 57                   | 0                   | 0                    |
| <b>seq5</b>    | Firmicutes    | Clostridia   | 0                   | 0                    | 7145                | 4834                 |
| <b>seq7</b>    | Firmicutes    | Clostridia   | 0                   | 0                    | 2359                | 2657                 |
| <b>seq42</b>   | Firmicutes    | Clostridia   | 0                   | 0                    | 1242                | 1956                 |
| <b>seq91</b>   | Firmicutes    | Clostridia   | 0                   | 0                    | 262                 | 310                  |
| <b>seq96</b>   | Firmicutes    | Clostridia   | 0                   | 0                    | 0                   | 0                    |
| <b>seq133</b>  | Firmicutes    | Clostridia   | 0                   | 0                    | 0                   | 0                    |
| <b>seq275</b>  | Firmicutes    | Clostridia   | 0                   | 0                    | 0                   | 0                    |
| <b>seq326</b>  | Firmicutes    | Clostridia   | 0                   | 0                    | 0                   | 0                    |
| <b>seq458</b>  | Firmicutes    | Clostridia   | 0                   | 0                    | 0                   | 0                    |
| <b>seq511</b>  | Firmicutes    | Clostridia   | 0                   | 0                    | 0                   | 0                    |
| <b>seq521</b>  | Firmicutes    | Clostridia   | 0                   | 0                    | 0                   | 0                    |
| <b>seq645</b>  | Firmicutes    | Clostridia   | 0                   | 0                    | 0                   | 0                    |
| <b>seq675</b>  | Firmicutes    | Clostridia   | 0                   | 0                    | 0                   | 0                    |
| <b>seq720</b>  | Firmicutes    | Clostridia   | 0                   | 0                    | 0                   | 0                    |

Sequence Count Table

|                | <b>Phylum</b> | <b>Class</b> | <b>Subject27WK0</b> | <b>Subject27WK12</b> | <b>Subject15WK0</b> | <b>Subject15WK12</b> |
|----------------|---------------|--------------|---------------------|----------------------|---------------------|----------------------|
| <b>seq1093</b> | Firmicutes    | Clostridia   | 0                   | 0                    | 0                   | 0                    |
| <b>seq1314</b> | Firmicutes    | Clostridia   | 0                   | 0                    | 0                   | 0                    |
| <b>seq1327</b> | Firmicutes    | Clostridia   | 0                   | 52                   | 0                   | 0                    |
| <b>seq1329</b> | Firmicutes    | Clostridia   | 0                   | 0                    | 0                   | 0                    |
| <b>seq1376</b> | Firmicutes    | Clostridia   | 0                   | 0                    | 0                   | 0                    |
| <b>seq1558</b> | Firmicutes    | Clostridia   | 0                   | 0                    | 0                   | 0                    |
| <b>seq1614</b> | Firmicutes    | Clostridia   | 0                   | 0                    | 0                   | 0                    |
| <b>seq74</b>   | Firmicutes    | Clostridia   | 0                   | 0                    | 0                   | 0                    |
| <b>seq602</b>  | Firmicutes    | Clostridia   | 13                  | 0                    | 0                   | 0                    |
| <b>seq974</b>  | Firmicutes    | Clostridia   | 5                   | 0                    | 0                   | 0                    |
| <b>seq1160</b> | Firmicutes    | Clostridia   | 0                   | 0                    | 0                   | 0                    |
| <b>seq1613</b> | Firmicutes    | Clostridia   | 0                   | 0                    | 0                   | 0                    |
| <b>seq1785</b> | Firmicutes    | Clostridia   | 0                   | 0                    | 0                   | 0                    |
| <b>seq1102</b> | Firmicutes    | Clostridia   | 0                   | 0                    | 0                   | 0                    |
| <b>seq1319</b> | Firmicutes    | Clostridia   | 0                   | 0                    | 0                   | 0                    |
| <b>seq1619</b> | Firmicutes    | Clostridia   | 0                   | 0                    | 0                   | 0                    |
| <b>seq550</b>  | Firmicutes    | Clostridia   | 0                   | 0                    | 0                   | 0                    |
| <b>seq664</b>  | Firmicutes    | Clostridia   | 0                   | 0                    | 0                   | 0                    |
| <b>seq5</b>    | Firmicutes    | Clostridia   | 2656                | 1528                 | 2360                | 4187                 |
| <b>seq7</b>    | Firmicutes    | Clostridia   | 3185                | 489                  | 4521                | 3507                 |
| <b>seq42</b>   | Firmicutes    | Clostridia   | 0                   | 313                  | 123                 | 186                  |
| <b>seq91</b>   | Firmicutes    | Clostridia   | 0                   | 120                  | 71                  | 66                   |
| <b>seq96</b>   | Firmicutes    | Clostridia   | 0                   | 1058                 | 0                   | 0                    |
| <b>seq133</b>  | Firmicutes    | Clostridia   | 1017                | 113                  | 1115                | 344                  |
| <b>seq275</b>  | Firmicutes    | Clostridia   | 0                   | 0                    | 0                   | 0                    |
| <b>seq326</b>  | Firmicutes    | Clostridia   | 0                   | 0                    | 0                   | 0                    |
| <b>seq458</b>  | Firmicutes    | Clostridia   | 0                   | 0                    | 0                   | 0                    |
| <b>seq511</b>  | Firmicutes    | Clostridia   | 0                   | 0                    | 0                   | 0                    |
| <b>seq521</b>  | Firmicutes    | Clostridia   | 0                   | 206                  | 0                   | 0                    |
| <b>seq645</b>  | Firmicutes    | Clostridia   | 0                   | 0                    | 0                   | 0                    |
| <b>seq675</b>  | Firmicutes    | Clostridia   | 0                   | 0                    | 0                   | 0                    |
| <b>seq720</b>  | Firmicutes    | Clostridia   | 0                   | 0                    | 0                   | 0                    |

Sequence Count Table

|                | <b>Phylum</b> | <b>Class</b> | <b>Δ</b> |  |  |  |
|----------------|---------------|--------------|----------|--|--|--|
| <b>seq1093</b> | Firmicutes    | Clostridia   |          |  |  |  |
| <b>seq1314</b> | Firmicutes    | Clostridia   |          |  |  |  |
| <b>seq1327</b> | Firmicutes    | Clostridia   |          |  |  |  |
| <b>seq1329</b> | Firmicutes    | Clostridia   |          |  |  |  |
| <b>seq1376</b> | Firmicutes    | Clostridia   |          |  |  |  |
| <b>seq1558</b> | Firmicutes    | Clostridia   |          |  |  |  |
| <b>seq1614</b> | Firmicutes    | Clostridia   |          |  |  |  |
| <b>seq74</b>   | Firmicutes    | Clostridia   |          |  |  |  |
| <b>seq602</b>  | Firmicutes    | Clostridia   |          |  |  |  |
| <b>seq974</b>  | Firmicutes    | Clostridia   |          |  |  |  |
| <b>seq1160</b> | Firmicutes    | Clostridia   |          |  |  |  |
| <b>seq1613</b> | Firmicutes    | Clostridia   |          |  |  |  |
| <b>seq1785</b> | Firmicutes    | Clostridia   |          |  |  |  |
| <b>seq1102</b> | Firmicutes    | Clostridia   |          |  |  |  |
| <b>seq1319</b> | Firmicutes    | Clostridia   |          |  |  |  |
| <b>seq1619</b> | Firmicutes    | Clostridia   |          |  |  |  |
| <b>seq550</b>  | Firmicutes    | Clostridia   |          |  |  |  |
| <b>seq664</b>  | Firmicutes    | Clostridia   |          |  |  |  |
| <b>seq5</b>    | Firmicutes    | Clostridia   |          |  |  |  |
| <b>seq7</b>    | Firmicutes    | Clostridia   |          |  |  |  |
| <b>seq42</b>   | Firmicutes    | Clostridia   |          |  |  |  |
| <b>seq91</b>   | Firmicutes    | Clostridia   |          |  |  |  |
| <b>seq96</b>   | Firmicutes    | Clostridia   |          |  |  |  |
| <b>seq133</b>  | Firmicutes    | Clostridia   |          |  |  |  |
| <b>seq275</b>  | Firmicutes    | Clostridia   |          |  |  |  |
| <b>seq326</b>  | Firmicutes    | Clostridia   |          |  |  |  |
| <b>seq458</b>  | Firmicutes    | Clostridia   |          |  |  |  |
| <b>seq511</b>  | Firmicutes    | Clostridia   |          |  |  |  |
| <b>seq521</b>  | Firmicutes    | Clostridia   |          |  |  |  |
| <b>seq645</b>  | Firmicutes    | Clostridia   |          |  |  |  |
| <b>seq675</b>  | Firmicutes    | Clostridia   |          |  |  |  |
| <b>seq720</b>  | Firmicutes    | Clostridia   |          |  |  |  |



Sequence Count Table

|                | <b>Phylum</b> | <b>Class</b> | <b>Order</b>  | <b>Family</b>   |
|----------------|---------------|--------------|---------------|-----------------|
| <b>seq734</b>  | Firmicutes    | Clostridia   | Clostridiales | Ruminococcaceae |
| <b>seq739</b>  | Firmicutes    | Clostridia   | Clostridiales | Ruminococcaceae |
| <b>seq755</b>  | Firmicutes    | Clostridia   | Clostridiales | Ruminococcaceae |
| <b>seq771</b>  | Firmicutes    | Clostridia   | Clostridiales | Ruminococcaceae |
| <b>seq776</b>  | Firmicutes    | Clostridia   | Clostridiales | Ruminococcaceae |
| <b>seq807</b>  | Firmicutes    | Clostridia   | Clostridiales | Ruminococcaceae |
| <b>seq817</b>  | Firmicutes    | Clostridia   | Clostridiales | Ruminococcaceae |
| <b>seq962</b>  | Firmicutes    | Clostridia   | Clostridiales | Ruminococcaceae |
| <b>seq1038</b> | Firmicutes    | Clostridia   | Clostridiales | Ruminococcaceae |
| <b>seq1044</b> | Firmicutes    | Clostridia   | Clostridiales | Ruminococcaceae |
| <b>seq1079</b> | Firmicutes    | Clostridia   | Clostridiales | Ruminococcaceae |
| <b>seq1117</b> | Firmicutes    | Clostridia   | Clostridiales | Ruminococcaceae |
| <b>seq1133</b> | Firmicutes    | Clostridia   | Clostridiales | Ruminococcaceae |
| <b>seq1136</b> | Firmicutes    | Clostridia   | Clostridiales | Ruminococcaceae |
| <b>seq1170</b> | Firmicutes    | Clostridia   | Clostridiales | Ruminococcaceae |
| <b>seq1217</b> | Firmicutes    | Clostridia   | Clostridiales | Ruminococcaceae |
| <b>seq161</b>  | Firmicutes    | Clostridia   | Clostridiales | Ruminococcaceae |
| <b>seq495</b>  | Firmicutes    | Clostridia   | Clostridiales | Ruminococcaceae |
| <b>seq826</b>  | Firmicutes    | Clostridia   | Clostridiales | Ruminococcaceae |
| <b>seq1486</b> | Firmicutes    | Clostridia   | Clostridiales | Ruminococcaceae |
| <b>seq553</b>  | Firmicutes    | Clostridia   | Clostridiales | Ruminococcaceae |
| <b>seq963</b>  | Firmicutes    | Clostridia   | Clostridiales | Ruminococcaceae |
| <b>seq1389</b> | Firmicutes    | Clostridia   | Clostridiales | Ruminococcaceae |
| <b>seq1393</b> | Firmicutes    | Clostridia   | Clostridiales | Ruminococcaceae |
| <b>seq735</b>  | Firmicutes    | Clostridia   | Clostridiales | Ruminococcaceae |
| <b>seq944</b>  | Firmicutes    | Clostridia   | Clostridiales | Ruminococcaceae |
| <b>seq1365</b> | Firmicutes    | Clostridia   | Clostridiales | Ruminococcaceae |
| <b>seq1425</b> | Firmicutes    | Clostridia   | Clostridiales | Ruminococcaceae |
| <b>seq1612</b> | Firmicutes    | Clostridia   | Clostridiales | Ruminococcaceae |
| <b>seq1165</b> | Firmicutes    | Clostridia   | Clostridiales | Ruminococcaceae |
| <b>seq1690</b> | Firmicutes    | Clostridia   | Clostridiales | Ruminococcaceae |
| <b>seq1302</b> | Firmicutes    | Clostridia   | Clostridiales | Ruminococcaceae |

Sequence Count Table

|                | <b>Phylum</b> | <b>Class</b> | <b>Genus</b>             | <b>Species</b> |
|----------------|---------------|--------------|--------------------------|----------------|
| <b>seq734</b>  | Firmicutes    | Clostridia   | Faecalibacterium         |                |
| <b>seq739</b>  | Firmicutes    | Clostridia   | Faecalibacterium         |                |
| <b>seq755</b>  | Firmicutes    | Clostridia   | Faecalibacterium         |                |
| <b>seq771</b>  | Firmicutes    | Clostridia   | Faecalibacterium         |                |
| <b>seq776</b>  | Firmicutes    | Clostridia   | Faecalibacterium         |                |
| <b>seq807</b>  | Firmicutes    | Clostridia   | Faecalibacterium         |                |
| <b>seq817</b>  | Firmicutes    | Clostridia   | Faecalibacterium         |                |
| <b>seq962</b>  | Firmicutes    | Clostridia   | Faecalibacterium         |                |
| <b>seq1038</b> | Firmicutes    | Clostridia   | Faecalibacterium         |                |
| <b>seq1044</b> | Firmicutes    | Clostridia   | Faecalibacterium         |                |
| <b>seq1079</b> | Firmicutes    | Clostridia   | Faecalibacterium         |                |
| <b>seq1117</b> | Firmicutes    | Clostridia   | Faecalibacterium         |                |
| <b>seq1133</b> | Firmicutes    | Clostridia   | Faecalibacterium         |                |
| <b>seq1136</b> | Firmicutes    | Clostridia   | Faecalibacterium         |                |
| <b>seq1170</b> | Firmicutes    | Clostridia   | Faecalibacterium         |                |
| <b>seq1217</b> | Firmicutes    | Clostridia   | Faecalibacterium         |                |
| <b>seq161</b>  | Firmicutes    | Clostridia   | Flavonifractor           | plautii        |
| <b>seq495</b>  | Firmicutes    | Clostridia   | Flavonifractor           |                |
| <b>seq826</b>  | Firmicutes    | Clostridia   | Flavonifractor           |                |
| <b>seq1486</b> | Firmicutes    | Clostridia   | Flavonifractor           |                |
| <b>seq553</b>  | Firmicutes    | Clostridia   | Fournierella             |                |
| <b>seq963</b>  | Firmicutes    | Clostridia   | Fournierella             |                |
| <b>seq1389</b> | Firmicutes    | Clostridia   | Fournierella             |                |
| <b>seq1393</b> | Firmicutes    | Clostridia   | Fournierella             |                |
| <b>seq735</b>  | Firmicutes    | Clostridia   | GCA-900066225            |                |
| <b>seq944</b>  | Firmicutes    | Clostridia   | GCA-900066225            |                |
| <b>seq1365</b> | Firmicutes    | Clostridia   | GCA-900066225            |                |
| <b>seq1425</b> | Firmicutes    | Clostridia   | GCA-900066225            |                |
| <b>seq1612</b> | Firmicutes    | Clostridia   | GCA-900066225            |                |
| <b>seq1165</b> | Firmicutes    | Clostridia   | Harryflintia             |                |
| <b>seq1690</b> | Firmicutes    | Clostridia   | Harryflintia             | acetispora     |
| <b>seq1302</b> | Firmicutes    | Clostridia   | Hydrogenoanaerobacterium |                |

Sequence Count Table

|                | <b>Phylum</b> | <b>Class</b> | <b>Subject34WK0</b> | <b>Subject34WK12</b> | <b>Subject16WK0</b> | <b>Subject16WK12</b> |
|----------------|---------------|--------------|---------------------|----------------------|---------------------|----------------------|
| <b>seq734</b>  | Firmicutes    | Clostridia   | 0                   | 0                    | 0                   | 0                    |
| <b>seq739</b>  | Firmicutes    | Clostridia   | 0                   | 0                    | 0                   | 0                    |
| <b>seq755</b>  | Firmicutes    | Clostridia   | 0                   | 0                    | 0                   | 0                    |
| <b>seq771</b>  | Firmicutes    | Clostridia   | 0                   | 0                    | 0                   | 0                    |
| <b>seq776</b>  | Firmicutes    | Clostridia   | 0                   | 0                    | 0                   | 0                    |
| <b>seq807</b>  | Firmicutes    | Clostridia   | 0                   | 0                    | 0                   | 104                  |
| <b>seq817</b>  | Firmicutes    | Clostridia   | 0                   | 0                    | 0                   | 0                    |
| <b>seq962</b>  | Firmicutes    | Clostridia   | 0                   | 0                    | 0                   | 158                  |
| <b>seq1038</b> | Firmicutes    | Clostridia   | 0                   | 0                    | 0                   | 0                    |
| <b>seq1044</b> | Firmicutes    | Clostridia   | 0                   | 0                    | 0                   | 0                    |
| <b>seq1079</b> | Firmicutes    | Clostridia   | 0                   | 0                    | 0                   | 0                    |
| <b>seq1117</b> | Firmicutes    | Clostridia   | 0                   | 0                    | 0                   | 0                    |
| <b>seq1133</b> | Firmicutes    | Clostridia   | 0                   | 0                    | 0                   | 97                   |
| <b>seq1136</b> | Firmicutes    | Clostridia   | 0                   | 0                    | 0                   | 0                    |
| <b>seq1170</b> | Firmicutes    | Clostridia   | 0                   | 0                    | 0                   | 0                    |
| <b>seq1217</b> | Firmicutes    | Clostridia   | 0                   | 0                    | 74                  | 0                    |
| <b>seq161</b>  | Firmicutes    | Clostridia   | 0                   | 12                   | 0                   | 9                    |
| <b>seq495</b>  | Firmicutes    | Clostridia   | 0                   | 0                    | 0                   | 0                    |
| <b>seq826</b>  | Firmicutes    | Clostridia   | 0                   | 0                    | 0                   | 0                    |
| <b>seq1486</b> | Firmicutes    | Clostridia   | 0                   | 0                    | 0                   | 0                    |
| <b>seq553</b>  | Firmicutes    | Clostridia   | 0                   | 0                    | 186                 | 91                   |
| <b>seq963</b>  | Firmicutes    | Clostridia   | 0                   | 0                    | 0                   | 0                    |
| <b>seq1389</b> | Firmicutes    | Clostridia   | 0                   | 0                    | 0                   | 0                    |
| <b>seq1393</b> | Firmicutes    | Clostridia   | 0                   | 0                    | 0                   | 0                    |
| <b>seq735</b>  | Firmicutes    | Clostridia   | 0                   | 0                    | 0                   | 0                    |
| <b>seq944</b>  | Firmicutes    | Clostridia   | 0                   | 0                    | 0                   | 0                    |
| <b>seq1365</b> | Firmicutes    | Clostridia   | 0                   | 0                    | 0                   | 0                    |
| <b>seq1425</b> | Firmicutes    | Clostridia   | 0                   | 0                    | 0                   | 0                    |
| <b>seq1612</b> | Firmicutes    | Clostridia   | 0                   | 0                    | 4                   | 5                    |
| <b>seq1165</b> | Firmicutes    | Clostridia   | 0                   | 0                    | 0                   | 0                    |
| <b>seq1690</b> | Firmicutes    | Clostridia   | 0                   | 0                    | 0                   | 0                    |
| <b>seq1302</b> | Firmicutes    | Clostridia   | 0                   | 0                    | 0                   | 0                    |

Sequence Count Table

|                | <b>Phylum</b> | <b>Class</b> | <b>Subject17WK0</b> | <b>Subject17WK12</b> | <b>Subject1WK0</b> | <b>Subject1WK12</b> |
|----------------|---------------|--------------|---------------------|----------------------|--------------------|---------------------|
| <b>seq734</b>  | Firmicutes    | Clostridia   | 0                   | 0                    | 0                  | 0                   |
| <b>seq739</b>  | Firmicutes    | Clostridia   | 0                   | 0                    | 0                  | 0                   |
| <b>seq755</b>  | Firmicutes    | Clostridia   | 0                   | 0                    | 0                  | 0                   |
| <b>seq771</b>  | Firmicutes    | Clostridia   | 0                   | 0                    | 0                  | 0                   |
| <b>seq776</b>  | Firmicutes    | Clostridia   | 0                   | 0                    | 0                  | 0                   |
| <b>seq807</b>  | Firmicutes    | Clostridia   | 0                   | 0                    | 0                  | 0                   |
| <b>seq817</b>  | Firmicutes    | Clostridia   | 0                   | 0                    | 0                  | 0                   |
| <b>seq962</b>  | Firmicutes    | Clostridia   | 0                   | 0                    | 0                  | 0                   |
| <b>seq1038</b> | Firmicutes    | Clostridia   | 0                   | 0                    | 0                  | 0                   |
| <b>seq1044</b> | Firmicutes    | Clostridia   | 0                   | 0                    | 0                  | 0                   |
| <b>seq1079</b> | Firmicutes    | Clostridia   | 0                   | 0                    | 0                  | 0                   |
| <b>seq1117</b> | Firmicutes    | Clostridia   | 0                   | 0                    | 0                  | 0                   |
| <b>seq1133</b> | Firmicutes    | Clostridia   | 0                   | 0                    | 0                  | 0                   |
| <b>seq1136</b> | Firmicutes    | Clostridia   | 0                   | 0                    | 0                  | 0                   |
| <b>seq1170</b> | Firmicutes    | Clostridia   | 0                   | 0                    | 0                  | 0                   |
| <b>seq1217</b> | Firmicutes    | Clostridia   | 0                   | 0                    | 0                  | 0                   |
| <b>seq161</b>  | Firmicutes    | Clostridia   | 0                   | 28                   | 128                | 111                 |
| <b>seq495</b>  | Firmicutes    | Clostridia   | 0                   | 0                    | 136                | 150                 |
| <b>seq826</b>  | Firmicutes    | Clostridia   | 0                   | 0                    | 0                  | 0                   |
| <b>seq1486</b> | Firmicutes    | Clostridia   | 0                   | 0                    | 0                  | 0                   |
| <b>seq553</b>  | Firmicutes    | Clostridia   | 108                 | 246                  | 0                  | 0                   |
| <b>seq963</b>  | Firmicutes    | Clostridia   | 0                   | 151                  | 0                  | 0                   |
| <b>seq1389</b> | Firmicutes    | Clostridia   | 0                   | 0                    | 0                  | 0                   |
| <b>seq1393</b> | Firmicutes    | Clostridia   | 0                   | 0                    | 0                  | 0                   |
| <b>seq735</b>  | Firmicutes    | Clostridia   | 0                   | 0                    | 0                  | 0                   |
| <b>seq944</b>  | Firmicutes    | Clostridia   | 16                  | 0                    | 14                 | 0                   |
| <b>seq1365</b> | Firmicutes    | Clostridia   | 7                   | 0                    | 0                  | 0                   |
| <b>seq1425</b> | Firmicutes    | Clostridia   | 0                   | 0                    | 0                  | 0                   |
| <b>seq1612</b> | Firmicutes    | Clostridia   | 0                   | 0                    | 0                  | 0                   |
| <b>seq1165</b> | Firmicutes    | Clostridia   | 0                   | 0                    | 53                 | 36                  |
| <b>seq1690</b> | Firmicutes    | Clostridia   | 0                   | 0                    | 0                  | 0                   |
| <b>seq1302</b> | Firmicutes    | Clostridia   | 15                  | 0                    | 6                  | 0                   |

Sequence Count Table

|                | <b>Phylum</b> | <b>Class</b> | <b>Subject2WK0</b> | <b>Subject2WK12</b> | <b>Subject3WK0</b> | <b>Subject3WK12</b> |
|----------------|---------------|--------------|--------------------|---------------------|--------------------|---------------------|
| <b>seq734</b>  | Firmicutes    | Clostridia   | 0                  | 0                   | 0                  | 0                   |
| <b>seq739</b>  | Firmicutes    | Clostridia   | 0                  | 0                   | 0                  | 0                   |
| <b>seq755</b>  | Firmicutes    | Clostridia   | 0                  | 0                   | 0                  | 0                   |
| <b>seq771</b>  | Firmicutes    | Clostridia   | 0                  | 0                   | 0                  | 0                   |
| <b>seq776</b>  | Firmicutes    | Clostridia   | 0                  | 0                   | 0                  | 0                   |
| <b>seq807</b>  | Firmicutes    | Clostridia   | 0                  | 0                   | 0                  | 0                   |
| <b>seq817</b>  | Firmicutes    | Clostridia   | 0                  | 0                   | 0                  | 0                   |
| <b>seq962</b>  | Firmicutes    | Clostridia   | 0                  | 0                   | 0                  | 0                   |
| <b>seq1038</b> | Firmicutes    | Clostridia   | 0                  | 0                   | 0                  | 0                   |
| <b>seq1044</b> | Firmicutes    | Clostridia   | 0                  | 0                   | 0                  | 0                   |
| <b>seq1079</b> | Firmicutes    | Clostridia   | 112                | 0                   | 0                  | 0                   |
| <b>seq1117</b> | Firmicutes    | Clostridia   | 0                  | 0                   | 0                  | 0                   |
| <b>seq1133</b> | Firmicutes    | Clostridia   | 0                  | 0                   | 0                  | 0                   |
| <b>seq1136</b> | Firmicutes    | Clostridia   | 0                  | 0                   | 0                  | 0                   |
| <b>seq1170</b> | Firmicutes    | Clostridia   | 0                  | 0                   | 0                  | 0                   |
| <b>seq1217</b> | Firmicutes    | Clostridia   | 0                  | 0                   | 0                  | 0                   |
| <b>seq161</b>  | Firmicutes    | Clostridia   | 30                 | 84                  | 198                | 83                  |
| <b>seq495</b>  | Firmicutes    | Clostridia   | 0                  | 0                   | 0                  | 0                   |
| <b>seq826</b>  | Firmicutes    | Clostridia   | 10                 | 11                  | 14                 | 0                   |
| <b>seq1486</b> | Firmicutes    | Clostridia   | 0                  | 0                   | 0                  | 0                   |
| <b>seq553</b>  | Firmicutes    | Clostridia   | 0                  | 0                   | 0                  | 0                   |
| <b>seq963</b>  | Firmicutes    | Clostridia   | 0                  | 0                   | 0                  | 0                   |
| <b>seq1389</b> | Firmicutes    | Clostridia   | 0                  | 0                   | 0                  | 0                   |
| <b>seq1393</b> | Firmicutes    | Clostridia   | 0                  | 23                  | 0                  | 0                   |
| <b>seq735</b>  | Firmicutes    | Clostridia   | 0                  | 0                   | 0                  | 0                   |
| <b>seq944</b>  | Firmicutes    | Clostridia   | 0                  | 0                   | 0                  | 0                   |
| <b>seq1365</b> | Firmicutes    | Clostridia   | 0                  | 0                   | 0                  | 0                   |
| <b>seq1425</b> | Firmicutes    | Clostridia   | 0                  | 0                   | 0                  | 0                   |
| <b>seq1612</b> | Firmicutes    | Clostridia   | 0                  | 0                   | 0                  | 0                   |
| <b>seq1165</b> | Firmicutes    | Clostridia   | 0                  | 0                   | 0                  | 0                   |
| <b>seq1690</b> | Firmicutes    | Clostridia   | 0                  | 0                   | 0                  | 0                   |
| <b>seq1302</b> | Firmicutes    | Clostridia   | 0                  | 0                   | 0                  | 0                   |

Sequence Count Table

|                | <b>Phylum</b> | <b>Class</b> | <b>Subject4WK0</b> | <b>Subject4WK12</b> | <b>Subject5WK0</b> | <b>Subject5WK12</b> |
|----------------|---------------|--------------|--------------------|---------------------|--------------------|---------------------|
| <b>seq734</b>  | Firmicutes    | Clostridia   | 0                  | 0                   | 0                  | 0                   |
| <b>seq739</b>  | Firmicutes    | Clostridia   | 0                  | 0                   | 0                  | 0                   |
| <b>seq755</b>  | Firmicutes    | Clostridia   | 0                  | 0                   | 0                  | 0                   |
| <b>seq771</b>  | Firmicutes    | Clostridia   | 0                  | 0                   | 0                  | 0                   |
| <b>seq776</b>  | Firmicutes    | Clostridia   | 0                  | 0                   | 0                  | 0                   |
| <b>seq807</b>  | Firmicutes    | Clostridia   | 0                  | 0                   | 0                  | 0                   |
| <b>seq817</b>  | Firmicutes    | Clostridia   | 0                  | 0                   | 0                  | 0                   |
| <b>seq962</b>  | Firmicutes    | Clostridia   | 0                  | 0                   | 0                  | 0                   |
| <b>seq1038</b> | Firmicutes    | Clostridia   | 0                  | 0                   | 0                  | 0                   |
| <b>seq1044</b> | Firmicutes    | Clostridia   | 0                  | 0                   | 0                  | 0                   |
| <b>seq1079</b> | Firmicutes    | Clostridia   | 0                  | 0                   | 0                  | 0                   |
| <b>seq1117</b> | Firmicutes    | Clostridia   | 0                  | 0                   | 0                  | 0                   |
| <b>seq1133</b> | Firmicutes    | Clostridia   | 0                  | 0                   | 0                  | 0                   |
| <b>seq1136</b> | Firmicutes    | Clostridia   | 0                  | 0                   | 0                  | 0                   |
| <b>seq1170</b> | Firmicutes    | Clostridia   | 0                  | 0                   | 0                  | 0                   |
| <b>seq1217</b> | Firmicutes    | Clostridia   | 0                  | 0                   | 0                  | 0                   |
| <b>seq161</b>  | Firmicutes    | Clostridia   | 50                 | 124                 | 187                | 189                 |
| <b>seq495</b>  | Firmicutes    | Clostridia   | 46                 | 24                  | 0                  | 0                   |
| <b>seq826</b>  | Firmicutes    | Clostridia   | 0                  | 0                   | 0                  | 17                  |
| <b>seq1486</b> | Firmicutes    | Clostridia   | 0                  | 0                   | 0                  | 0                   |
| <b>seq553</b>  | Firmicutes    | Clostridia   | 0                  | 0                   | 0                  | 0                   |
| <b>seq963</b>  | Firmicutes    | Clostridia   | 0                  | 0                   | 0                  | 0                   |
| <b>seq1389</b> | Firmicutes    | Clostridia   | 0                  | 0                   | 0                  | 0                   |
| <b>seq1393</b> | Firmicutes    | Clostridia   | 0                  | 0                   | 0                  | 0                   |
| <b>seq735</b>  | Firmicutes    | Clostridia   | 22                 | 13                  | 0                  | 0                   |
| <b>seq944</b>  | Firmicutes    | Clostridia   | 17                 | 19                  | 0                  | 0                   |
| <b>seq1365</b> | Firmicutes    | Clostridia   | 0                  | 0                   | 0                  | 0                   |
| <b>seq1425</b> | Firmicutes    | Clostridia   | 0                  | 0                   | 0                  | 0                   |
| <b>seq1612</b> | Firmicutes    | Clostridia   | 0                  | 0                   | 0                  | 0                   |
| <b>seq1165</b> | Firmicutes    | Clostridia   | 0                  | 0                   | 0                  | 0                   |
| <b>seq1690</b> | Firmicutes    | Clostridia   | 0                  | 13                  | 0                  | 0                   |
| <b>seq1302</b> | Firmicutes    | Clostridia   | 0                  | 0                   | 0                  | 0                   |

Sequence Count Table

|                | <b>Phylum</b> | <b>Class</b> | <b>Subject6WK0</b> | <b>Subject6WK12</b> | <b>Subject18WK0</b> | <b>Subject18WK12</b> |
|----------------|---------------|--------------|--------------------|---------------------|---------------------|----------------------|
| <b>seq734</b>  | Firmicutes    | Clostridia   | 0                  | 0                   | 0                   | 0                    |
| <b>seq739</b>  | Firmicutes    | Clostridia   | 0                  | 0                   | 0                   | 0                    |
| <b>seq755</b>  | Firmicutes    | Clostridia   | 0                  | 0                   | 0                   | 0                    |
| <b>seq771</b>  | Firmicutes    | Clostridia   | 0                  | 0                   | 0                   | 0                    |
| <b>seq776</b>  | Firmicutes    | Clostridia   | 0                  | 0                   | 0                   | 0                    |
| <b>seq807</b>  | Firmicutes    | Clostridia   | 0                  | 0                   | 0                   | 0                    |
| <b>seq817</b>  | Firmicutes    | Clostridia   | 0                  | 0                   | 0                   | 0                    |
| <b>seq962</b>  | Firmicutes    | Clostridia   | 0                  | 0                   | 0                   | 0                    |
| <b>seq1038</b> | Firmicutes    | Clostridia   | 0                  | 0                   | 0                   | 0                    |
| <b>seq1044</b> | Firmicutes    | Clostridia   | 0                  | 0                   | 0                   | 0                    |
| <b>seq1079</b> | Firmicutes    | Clostridia   | 0                  | 0                   | 0                   | 0                    |
| <b>seq1117</b> | Firmicutes    | Clostridia   | 0                  | 0                   | 0                   | 0                    |
| <b>seq1133</b> | Firmicutes    | Clostridia   | 0                  | 0                   | 0                   | 0                    |
| <b>seq1136</b> | Firmicutes    | Clostridia   | 0                  | 0                   | 0                   | 0                    |
| <b>seq1170</b> | Firmicutes    | Clostridia   | 0                  | 88                  | 0                   | 0                    |
| <b>seq1217</b> | Firmicutes    | Clostridia   | 0                  | 0                   | 0                   | 0                    |
| <b>seq161</b>  | Firmicutes    | Clostridia   | 26                 | 0                   | 138                 | 74                   |
| <b>seq495</b>  | Firmicutes    | Clostridia   | 0                  | 0                   | 0                   | 0                    |
| <b>seq826</b>  | Firmicutes    | Clostridia   | 0                  | 0                   | 48                  | 9                    |
| <b>seq1486</b> | Firmicutes    | Clostridia   | 0                  | 0                   | 0                   | 0                    |
| <b>seq553</b>  | Firmicutes    | Clostridia   | 0                  | 0                   | 0                   | 0                    |
| <b>seq963</b>  | Firmicutes    | Clostridia   | 0                  | 0                   | 0                   | 0                    |
| <b>seq1389</b> | Firmicutes    | Clostridia   | 0                  | 0                   | 0                   | 0                    |
| <b>seq1393</b> | Firmicutes    | Clostridia   | 0                  | 0                   | 0                   | 0                    |
| <b>seq735</b>  | Firmicutes    | Clostridia   | 0                  | 15                  | 0                   | 0                    |
| <b>seq944</b>  | Firmicutes    | Clostridia   | 8                  | 8                   | 0                   | 0                    |
| <b>seq1365</b> | Firmicutes    | Clostridia   | 0                  | 0                   | 0                   | 0                    |
| <b>seq1425</b> | Firmicutes    | Clostridia   | 0                  | 0                   | 20                  | 0                    |
| <b>seq1612</b> | Firmicutes    | Clostridia   | 0                  | 0                   | 0                   | 0                    |
| <b>seq1165</b> | Firmicutes    | Clostridia   | 0                  | 0                   | 0                   | 0                    |
| <b>seq1690</b> | Firmicutes    | Clostridia   | 0                  | 0                   | 0                   | 0                    |
| <b>seq1302</b> | Firmicutes    | Clostridia   | 6                  | 0                   | 0                   | 0                    |

Sequence Count Table

|                | <b>Phylum</b> | <b>Class</b> | <b>Subject19WK0</b> | <b>Subject19WK12</b> | <b>Subject20WK0</b> | <b>Subject20WK12</b> |
|----------------|---------------|--------------|---------------------|----------------------|---------------------|----------------------|
| <b>seq734</b>  | Firmicutes    | Clostridia   | 0                   | 0                    | 0                   | 0                    |
| <b>seq739</b>  | Firmicutes    | Clostridia   | 0                   | 0                    | 0                   | 0                    |
| <b>seq755</b>  | Firmicutes    | Clostridia   | 0                   | 0                    | 0                   | 0                    |
| <b>seq771</b>  | Firmicutes    | Clostridia   | 0                   | 0                    | 0                   | 0                    |
| <b>seq776</b>  | Firmicutes    | Clostridia   | 0                   | 0                    | 0                   | 0                    |
| <b>seq807</b>  | Firmicutes    | Clostridia   | 0                   | 0                    | 0                   | 0                    |
| <b>seq817</b>  | Firmicutes    | Clostridia   | 0                   | 0                    | 0                   | 0                    |
| <b>seq962</b>  | Firmicutes    | Clostridia   | 0                   | 0                    | 0                   | 0                    |
| <b>seq1038</b> | Firmicutes    | Clostridia   | 0                   | 0                    | 0                   | 0                    |
| <b>seq1044</b> | Firmicutes    | Clostridia   | 0                   | 0                    | 0                   | 0                    |
| <b>seq1079</b> | Firmicutes    | Clostridia   | 0                   | 0                    | 0                   | 0                    |
| <b>seq1117</b> | Firmicutes    | Clostridia   | 0                   | 0                    | 0                   | 101                  |
| <b>seq1133</b> | Firmicutes    | Clostridia   | 0                   | 0                    | 0                   | 0                    |
| <b>seq1136</b> | Firmicutes    | Clostridia   | 0                   | 0                    | 0                   | 0                    |
| <b>seq1170</b> | Firmicutes    | Clostridia   | 0                   | 0                    | 0                   | 0                    |
| <b>seq1217</b> | Firmicutes    | Clostridia   | 0                   | 0                    | 0                   | 0                    |
| <b>seq161</b>  | Firmicutes    | Clostridia   | 252                 | 479                  | 0                   | 155                  |
| <b>seq495</b>  | Firmicutes    | Clostridia   | 0                   | 0                    | 6                   | 0                    |
| <b>seq826</b>  | Firmicutes    | Clostridia   | 21                  | 18                   | 0                   | 0                    |
| <b>seq1486</b> | Firmicutes    | Clostridia   | 0                   | 0                    | 0                   | 0                    |
| <b>seq553</b>  | Firmicutes    | Clostridia   | 0                   | 0                    | 0                   | 0                    |
| <b>seq963</b>  | Firmicutes    | Clostridia   | 0                   | 0                    | 0                   | 0                    |
| <b>seq1389</b> | Firmicutes    | Clostridia   | 0                   | 0                    | 0                   | 0                    |
| <b>seq1393</b> | Firmicutes    | Clostridia   | 0                   | 0                    | 0                   | 0                    |
| <b>seq735</b>  | Firmicutes    | Clostridia   | 0                   | 0                    | 49                  | 0                    |
| <b>seq944</b>  | Firmicutes    | Clostridia   | 0                   | 0                    | 0                   | 4                    |
| <b>seq1365</b> | Firmicutes    | Clostridia   | 0                   | 0                    | 0                   | 0                    |
| <b>seq1425</b> | Firmicutes    | Clostridia   | 0                   | 0                    | 0                   | 0                    |
| <b>seq1612</b> | Firmicutes    | Clostridia   | 0                   | 0                    | 0                   | 0                    |
| <b>seq1165</b> | Firmicutes    | Clostridia   | 0                   | 0                    | 0                   | 0                    |
| <b>seq1690</b> | Firmicutes    | Clostridia   | 0                   | 0                    | 0                   | 0                    |
| <b>seq1302</b> | Firmicutes    | Clostridia   | 0                   | 0                    | 0                   | 0                    |



Sequence Count Table

|                | <b>Phylum</b> | <b>Class</b> | <b>Subject7WK0</b> | <b>Subject7WK12</b> | <b>Subject21WK0</b> | <b>Subject21WK12</b> |
|----------------|---------------|--------------|--------------------|---------------------|---------------------|----------------------|
| <b>seq734</b>  | Firmicutes    | Clostridia   | 0                  | 0                   | 0                   | 0                    |
| <b>seq739</b>  | Firmicutes    | Clostridia   | 0                  | 0                   | 0                   | 0                    |
| <b>seq755</b>  | Firmicutes    | Clostridia   | 0                  | 0                   | 0                   | 0                    |
| <b>seq771</b>  | Firmicutes    | Clostridia   | 0                  | 0                   | 0                   | 0                    |
| <b>seq776</b>  | Firmicutes    | Clostridia   | 0                  | 0                   | 0                   | 0                    |
| <b>seq807</b>  | Firmicutes    | Clostridia   | 0                  | 0                   | 0                   | 0                    |
| <b>seq817</b>  | Firmicutes    | Clostridia   | 0                  | 0                   | 0                   | 0                    |
| <b>seq962</b>  | Firmicutes    | Clostridia   | 0                  | 0                   | 0                   | 0                    |
| <b>seq1038</b> | Firmicutes    | Clostridia   | 0                  | 0                   | 0                   | 0                    |
| <b>seq1044</b> | Firmicutes    | Clostridia   | 0                  | 127                 | 0                   | 0                    |
| <b>seq1079</b> | Firmicutes    | Clostridia   | 0                  | 0                   | 0                   | 0                    |
| <b>seq1117</b> | Firmicutes    | Clostridia   | 0                  | 0                   | 0                   | 0                    |
| <b>seq1133</b> | Firmicutes    | Clostridia   | 0                  | 0                   | 0                   | 0                    |
| <b>seq1136</b> | Firmicutes    | Clostridia   | 0                  | 0                   | 0                   | 0                    |
| <b>seq1170</b> | Firmicutes    | Clostridia   | 0                  | 0                   | 0                   | 0                    |
| <b>seq1217</b> | Firmicutes    | Clostridia   | 0                  | 0                   | 0                   | 0                    |
| <b>seq161</b>  | Firmicutes    | Clostridia   | 261                | 202                 | 368                 | 1355                 |
| <b>seq495</b>  | Firmicutes    | Clostridia   | 0                  | 0                   | 0                   | 0                    |
| <b>seq826</b>  | Firmicutes    | Clostridia   | 0                  | 41                  | 0                   | 0                    |
| <b>seq1486</b> | Firmicutes    | Clostridia   | 30                 | 0                   | 0                   | 0                    |
| <b>seq553</b>  | Firmicutes    | Clostridia   | 0                  | 0                   | 0                   | 0                    |
| <b>seq963</b>  | Firmicutes    | Clostridia   | 0                  | 0                   | 0                   | 0                    |
| <b>seq1389</b> | Firmicutes    | Clostridia   | 0                  | 0                   | 0                   | 0                    |
| <b>seq1393</b> | Firmicutes    | Clostridia   | 0                  | 0                   | 0                   | 0                    |
| <b>seq735</b>  | Firmicutes    | Clostridia   | 0                  | 0                   | 0                   | 0                    |
| <b>seq944</b>  | Firmicutes    | Clostridia   | 0                  | 0                   | 0                   | 0                    |
| <b>seq1365</b> | Firmicutes    | Clostridia   | 0                  | 0                   | 0                   | 0                    |
| <b>seq1425</b> | Firmicutes    | Clostridia   | 0                  | 0                   | 0                   | 0                    |
| <b>seq1612</b> | Firmicutes    | Clostridia   | 0                  | 0                   | 0                   | 0                    |
| <b>seq1165</b> | Firmicutes    | Clostridia   | 0                  | 0                   | 0                   | 0                    |
| <b>seq1690</b> | Firmicutes    | Clostridia   | 0                  | 0                   | 0                   | 0                    |
| <b>seq1302</b> | Firmicutes    | Clostridia   | 0                  | 0                   | 0                   | 0                    |

Sequence Count Table

|                | <b>Phylum</b> | <b>Class</b> | <b>Subject8WK0</b> | <b>Subject8WK12</b> | <b>Subject9WK0</b> | <b>Subject9WK12</b> |
|----------------|---------------|--------------|--------------------|---------------------|--------------------|---------------------|
| <b>seq734</b>  | Firmicutes    | Clostridia   | 0                  | 0                   | 0                  | 0                   |
| <b>seq739</b>  | Firmicutes    | Clostridia   | 0                  | 0                   | 0                  | 0                   |
| <b>seq755</b>  | Firmicutes    | Clostridia   | 0                  | 0                   | 0                  | 0                   |
| <b>seq771</b>  | Firmicutes    | Clostridia   | 0                  | 0                   | 0                  | 0                   |
| <b>seq776</b>  | Firmicutes    | Clostridia   | 0                  | 0                   | 0                  | 0                   |
| <b>seq807</b>  | Firmicutes    | Clostridia   | 0                  | 0                   | 0                  | 0                   |
| <b>seq817</b>  | Firmicutes    | Clostridia   | 0                  | 0                   | 0                  | 0                   |
| <b>seq962</b>  | Firmicutes    | Clostridia   | 0                  | 0                   | 0                  | 0                   |
| <b>seq1038</b> | Firmicutes    | Clostridia   | 0                  | 0                   | 0                  | 0                   |
| <b>seq1044</b> | Firmicutes    | Clostridia   | 0                  | 0                   | 0                  | 0                   |
| <b>seq1079</b> | Firmicutes    | Clostridia   | 0                  | 0                   | 0                  | 0                   |
| <b>seq1117</b> | Firmicutes    | Clostridia   | 0                  | 0                   | 0                  | 0                   |
| <b>seq1133</b> | Firmicutes    | Clostridia   | 0                  | 0                   | 0                  | 0                   |
| <b>seq1136</b> | Firmicutes    | Clostridia   | 0                  | 0                   | 0                  | 0                   |
| <b>seq1170</b> | Firmicutes    | Clostridia   | 0                  | 0                   | 0                  | 0                   |
| <b>seq1217</b> | Firmicutes    | Clostridia   | 0                  | 0                   | 0                  | 0                   |
| <b>seq161</b>  | Firmicutes    | Clostridia   | 67                 | 170                 | 246                | 37                  |
| <b>seq495</b>  | Firmicutes    | Clostridia   | 0                  | 0                   | 45                 | 0                   |
| <b>seq826</b>  | Firmicutes    | Clostridia   | 0                  | 0                   | 0                  | 0                   |
| <b>seq1486</b> | Firmicutes    | Clostridia   | 0                  | 0                   | 0                  | 0                   |
| <b>seq553</b>  | Firmicutes    | Clostridia   | 0                  | 0                   | 0                  | 0                   |
| <b>seq963</b>  | Firmicutes    | Clostridia   | 0                  | 0                   | 0                  | 0                   |
| <b>seq1389</b> | Firmicutes    | Clostridia   | 0                  | 0                   | 0                  | 0                   |
| <b>seq1393</b> | Firmicutes    | Clostridia   | 0                  | 0                   | 0                  | 0                   |
| <b>seq735</b>  | Firmicutes    | Clostridia   | 0                  | 0                   | 0                  | 0                   |
| <b>seq944</b>  | Firmicutes    | Clostridia   | 0                  | 0                   | 0                  | 0                   |
| <b>seq1365</b> | Firmicutes    | Clostridia   | 0                  | 0                   | 0                  | 0                   |
| <b>seq1425</b> | Firmicutes    | Clostridia   | 0                  | 0                   | 0                  | 0                   |
| <b>seq1612</b> | Firmicutes    | Clostridia   | 0                  | 0                   | 0                  | 0                   |
| <b>seq1165</b> | Firmicutes    | Clostridia   | 0                  | 0                   | 0                  | 0                   |
| <b>seq1690</b> | Firmicutes    | Clostridia   | 0                  | 0                   | 0                  | 0                   |
| <b>seq1302</b> | Firmicutes    | Clostridia   | 0                  | 0                   | 0                  | 0                   |

Sequence Count Table

|                | <b>Phylum</b> | <b>Class</b> | <b>Subject10WK0</b> | <b>Subject10WK12</b> | <b>Subject22WK0</b> | <b>Subject22WK12</b> |
|----------------|---------------|--------------|---------------------|----------------------|---------------------|----------------------|
| <b>seq734</b>  | Firmicutes    | Clostridia   | 0                   | 0                    | 0                   | 0                    |
| <b>seq739</b>  | Firmicutes    | Clostridia   | 0                   | 0                    | 0                   | 0                    |
| <b>seq755</b>  | Firmicutes    | Clostridia   | 0                   | 0                    | 0                   | 0                    |
| <b>seq771</b>  | Firmicutes    | Clostridia   | 0                   | 0                    | 143                 | 152                  |
| <b>seq776</b>  | Firmicutes    | Clostridia   | 0                   | 0                    | 0                   | 0                    |
| <b>seq807</b>  | Firmicutes    | Clostridia   | 0                   | 0                    | 0                   | 0                    |
| <b>seq817</b>  | Firmicutes    | Clostridia   | 0                   | 0                    | 0                   | 0                    |
| <b>seq962</b>  | Firmicutes    | Clostridia   | 0                   | 0                    | 0                   | 0                    |
| <b>seq1038</b> | Firmicutes    | Clostridia   | 0                   | 0                    | 0                   | 0                    |
| <b>seq1044</b> | Firmicutes    | Clostridia   | 0                   | 0                    | 0                   | 0                    |
| <b>seq1079</b> | Firmicutes    | Clostridia   | 0                   | 0                    | 0                   | 0                    |
| <b>seq1117</b> | Firmicutes    | Clostridia   | 0                   | 0                    | 0                   | 0                    |
| <b>seq1133</b> | Firmicutes    | Clostridia   | 0                   | 0                    | 0                   | 0                    |
| <b>seq1136</b> | Firmicutes    | Clostridia   | 0                   | 0                    | 0                   | 0                    |
| <b>seq1170</b> | Firmicutes    | Clostridia   | 0                   | 0                    | 0                   | 0                    |
| <b>seq1217</b> | Firmicutes    | Clostridia   | 0                   | 0                    | 0                   | 0                    |
| <b>seq161</b>  | Firmicutes    | Clostridia   | 458                 | 123                  | 0                   | 0                    |
| <b>seq495</b>  | Firmicutes    | Clostridia   | 0                   | 0                    | 8                   | 24                   |
| <b>seq826</b>  | Firmicutes    | Clostridia   | 0                   | 14                   | 0                   | 0                    |
| <b>seq1486</b> | Firmicutes    | Clostridia   | 0                   | 0                    | 0                   | 0                    |
| <b>seq553</b>  | Firmicutes    | Clostridia   | 0                   | 0                    | 0                   | 0                    |
| <b>seq963</b>  | Firmicutes    | Clostridia   | 0                   | 0                    | 0                   | 0                    |
| <b>seq1389</b> | Firmicutes    | Clostridia   | 0                   | 0                    | 43                  | 0                    |
| <b>seq1393</b> | Firmicutes    | Clostridia   | 0                   | 0                    | 0                   | 0                    |
| <b>seq735</b>  | Firmicutes    | Clostridia   | 0                   | 0                    | 31                  | 0                    |
| <b>seq944</b>  | Firmicutes    | Clostridia   | 36                  | 0                    | 5                   | 0                    |
| <b>seq1365</b> | Firmicutes    | Clostridia   | 10                  | 0                    | 0                   | 0                    |
| <b>seq1425</b> | Firmicutes    | Clostridia   | 0                   | 0                    | 0                   | 0                    |
| <b>seq1612</b> | Firmicutes    | Clostridia   | 0                   | 0                    | 0                   | 0                    |
| <b>seq1165</b> | Firmicutes    | Clostridia   | 0                   | 0                    | 0                   | 0                    |
| <b>seq1690</b> | Firmicutes    | Clostridia   | 0                   | 0                    | 0                   | 0                    |
| <b>seq1302</b> | Firmicutes    | Clostridia   | 0                   | 0                    | 0                   | 0                    |

Sequence Count Table

|                | <b>Phylum</b> | <b>Class</b> | <b>Subject23WK0</b> | <b>Subject23WK12</b> | <b>Subject24WK0</b> | <b>Subject24WK12</b> |
|----------------|---------------|--------------|---------------------|----------------------|---------------------|----------------------|
| <b>seq734</b>  | Firmicutes    | Clostridia   | 0                   | 0                    | 0                   | 0                    |
| <b>seq739</b>  | Firmicutes    | Clostridia   | 0                   | 0                    | 0                   | 0                    |
| <b>seq755</b>  | Firmicutes    | Clostridia   | 0                   | 0                    | 0                   | 0                    |
| <b>seq771</b>  | Firmicutes    | Clostridia   | 0                   | 0                    | 0                   | 0                    |
| <b>seq776</b>  | Firmicutes    | Clostridia   | 0                   | 0                    | 0                   | 0                    |
| <b>seq807</b>  | Firmicutes    | Clostridia   | 0                   | 0                    | 0                   | 0                    |
| <b>seq817</b>  | Firmicutes    | Clostridia   | 0                   | 0                    | 0                   | 0                    |
| <b>seq962</b>  | Firmicutes    | Clostridia   | 0                   | 0                    | 0                   | 0                    |
| <b>seq1038</b> | Firmicutes    | Clostridia   | 0                   | 0                    | 0                   | 0                    |
| <b>seq1044</b> | Firmicutes    | Clostridia   | 0                   | 0                    | 0                   | 0                    |
| <b>seq1079</b> | Firmicutes    | Clostridia   | 0                   | 0                    | 0                   | 0                    |
| <b>seq1117</b> | Firmicutes    | Clostridia   | 0                   | 0                    | 0                   | 0                    |
| <b>seq1133</b> | Firmicutes    | Clostridia   | 0                   | 0                    | 0                   | 0                    |
| <b>seq1136</b> | Firmicutes    | Clostridia   | 0                   | 0                    | 0                   | 0                    |
| <b>seq1170</b> | Firmicutes    | Clostridia   | 0                   | 0                    | 0                   | 0                    |
| <b>seq1217</b> | Firmicutes    | Clostridia   | 0                   | 0                    | 0                   | 0                    |
| <b>seq161</b>  | Firmicutes    | Clostridia   | 0                   | 0                    | 29                  | 69                   |
| <b>seq495</b>  | Firmicutes    | Clostridia   | 0                   | 0                    | 37                  | 49                   |
| <b>seq826</b>  | Firmicutes    | Clostridia   | 0                   | 0                    | 0                   | 0                    |
| <b>seq1486</b> | Firmicutes    | Clostridia   | 0                   | 0                    | 0                   | 0                    |
| <b>seq553</b>  | Firmicutes    | Clostridia   | 0                   | 0                    | 0                   | 0                    |
| <b>seq963</b>  | Firmicutes    | Clostridia   | 0                   | 0                    | 0                   | 0                    |
| <b>seq1389</b> | Firmicutes    | Clostridia   | 0                   | 0                    | 0                   | 0                    |
| <b>seq1393</b> | Firmicutes    | Clostridia   | 0                   | 0                    | 0                   | 0                    |
| <b>seq735</b>  | Firmicutes    | Clostridia   | 0                   | 0                    | 0                   | 0                    |
| <b>seq944</b>  | Firmicutes    | Clostridia   | 0                   | 0                    | 16                  | 13                   |
| <b>seq1365</b> | Firmicutes    | Clostridia   | 0                   | 0                    | 0                   | 0                    |
| <b>seq1425</b> | Firmicutes    | Clostridia   | 0                   | 0                    | 0                   | 0                    |
| <b>seq1612</b> | Firmicutes    | Clostridia   | 0                   | 0                    | 0                   | 0                    |
| <b>seq1165</b> | Firmicutes    | Clostridia   | 0                   | 0                    | 0                   | 0                    |
| <b>seq1690</b> | Firmicutes    | Clostridia   | 0                   | 0                    | 0                   | 0                    |
| <b>seq1302</b> | Firmicutes    | Clostridia   | 0                   | 0                    | 0                   | 0                    |

Sequence Count Table

|                | <b>Phylum</b> | <b>Class</b> | <b>Subject11WK0</b> | <b>Subject11WK12</b> | <b>Subject12WK0</b> | <b>Subject12WK12</b> |
|----------------|---------------|--------------|---------------------|----------------------|---------------------|----------------------|
| <b>seq734</b>  | Firmicutes    | Clostridia   | 0                   | 0                    | 227                 | 103                  |
| <b>seq739</b>  | Firmicutes    | Clostridia   | 0                   | 0                    | 0                   | 0                    |
| <b>seq755</b>  | Firmicutes    | Clostridia   | 0                   | 0                    | 0                   | 0                    |
| <b>seq771</b>  | Firmicutes    | Clostridia   | 0                   | 0                    | 0                   | 0                    |
| <b>seq776</b>  | Firmicutes    | Clostridia   | 0                   | 0                    | 0                   | 0                    |
| <b>seq807</b>  | Firmicutes    | Clostridia   | 0                   | 0                    | 0                   | 0                    |
| <b>seq817</b>  | Firmicutes    | Clostridia   | 0                   | 0                    | 0                   | 0                    |
| <b>seq962</b>  | Firmicutes    | Clostridia   | 0                   | 0                    | 0                   | 0                    |
| <b>seq1038</b> | Firmicutes    | Clostridia   | 0                   | 0                    | 129                 | 0                    |
| <b>seq1044</b> | Firmicutes    | Clostridia   | 0                   | 0                    | 0                   | 0                    |
| <b>seq1079</b> | Firmicutes    | Clostridia   | 0                   | 0                    | 0                   | 0                    |
| <b>seq1117</b> | Firmicutes    | Clostridia   | 0                   | 0                    | 0                   | 0                    |
| <b>seq1133</b> | Firmicutes    | Clostridia   | 0                   | 0                    | 0                   | 0                    |
| <b>seq1136</b> | Firmicutes    | Clostridia   | 0                   | 0                    | 0                   | 0                    |
| <b>seq1170</b> | Firmicutes    | Clostridia   | 0                   | 0                    | 0                   | 0                    |
| <b>seq1217</b> | Firmicutes    | Clostridia   | 0                   | 0                    | 0                   | 0                    |
| <b>seq161</b>  | Firmicutes    | Clostridia   | 427                 | 107                  | 10                  | 79                   |
| <b>seq495</b>  | Firmicutes    | Clostridia   | 0                   | 0                    | 0                   | 0                    |
| <b>seq826</b>  | Firmicutes    | Clostridia   | 0                   | 0                    | 0                   | 0                    |
| <b>seq1486</b> | Firmicutes    | Clostridia   | 0                   | 0                    | 0                   | 0                    |
| <b>seq553</b>  | Firmicutes    | Clostridia   | 0                   | 0                    | 0                   | 0                    |
| <b>seq963</b>  | Firmicutes    | Clostridia   | 0                   | 0                    | 7                   | 0                    |
| <b>seq1389</b> | Firmicutes    | Clostridia   | 0                   | 0                    | 0                   | 0                    |
| <b>seq1393</b> | Firmicutes    | Clostridia   | 0                   | 0                    | 0                   | 0                    |
| <b>seq735</b>  | Firmicutes    | Clostridia   | 0                   | 0                    | 0                   | 0                    |
| <b>seq944</b>  | Firmicutes    | Clostridia   | 0                   | 0                    | 0                   | 0                    |
| <b>seq1365</b> | Firmicutes    | Clostridia   | 0                   | 0                    | 0                   | 0                    |
| <b>seq1425</b> | Firmicutes    | Clostridia   | 0                   | 0                    | 0                   | 0                    |
| <b>seq1612</b> | Firmicutes    | Clostridia   | 0                   | 0                    | 0                   | 0                    |
| <b>seq1165</b> | Firmicutes    | Clostridia   | 0                   | 0                    | 0                   | 0                    |
| <b>seq1690</b> | Firmicutes    | Clostridia   | 0                   | 0                    | 0                   | 0                    |
| <b>seq1302</b> | Firmicutes    | Clostridia   | 0                   | 0                    | 0                   | 0                    |

Sequence Count Table

|                | <b>Phylum</b> | <b>Class</b> | <b>Subject25WK0</b> | <b>Subject25WK12</b> | <b>Subject38WK0</b> | <b>Subject38WK12</b> |
|----------------|---------------|--------------|---------------------|----------------------|---------------------|----------------------|
| <b>seq734</b>  | Firmicutes    | Clostridia   | 0                   | 0                    | 0                   | 0                    |
| <b>seq739</b>  | Firmicutes    | Clostridia   | 0                   | 0                    | 0                   | 0                    |
| <b>seq755</b>  | Firmicutes    | Clostridia   | 0                   | 0                    | 0                   | 0                    |
| <b>seq771</b>  | Firmicutes    | Clostridia   | 0                   | 0                    | 0                   | 0                    |
| <b>seq776</b>  | Firmicutes    | Clostridia   | 0                   | 0                    | 0                   | 0                    |
| <b>seq807</b>  | Firmicutes    | Clostridia   | 0                   | 0                    | 0                   | 0                    |
| <b>seq817</b>  | Firmicutes    | Clostridia   | 0                   | 0                    | 0                   | 0                    |
| <b>seq962</b>  | Firmicutes    | Clostridia   | 0                   | 0                    | 0                   | 0                    |
| <b>seq1038</b> | Firmicutes    | Clostridia   | 0                   | 0                    | 0                   | 0                    |
| <b>seq1044</b> | Firmicutes    | Clostridia   | 0                   | 0                    | 0                   | 0                    |
| <b>seq1079</b> | Firmicutes    | Clostridia   | 0                   | 0                    | 0                   | 0                    |
| <b>seq1117</b> | Firmicutes    | Clostridia   | 0                   | 0                    | 0                   | 0                    |
| <b>seq1133</b> | Firmicutes    | Clostridia   | 0                   | 0                    | 0                   | 0                    |
| <b>seq1136</b> | Firmicutes    | Clostridia   | 0                   | 0                    | 0                   | 0                    |
| <b>seq1170</b> | Firmicutes    | Clostridia   | 0                   | 0                    | 0                   | 0                    |
| <b>seq1217</b> | Firmicutes    | Clostridia   | 0                   | 0                    | 0                   | 0                    |
| <b>seq161</b>  | Firmicutes    | Clostridia   | 17                  | 0                    | 0                   | 0                    |
| <b>seq495</b>  | Firmicutes    | Clostridia   | 17                  | 0                    | 0                   | 0                    |
| <b>seq826</b>  | Firmicutes    | Clostridia   | 0                   | 0                    | 0                   | 0                    |
| <b>seq1486</b> | Firmicutes    | Clostridia   | 0                   | 0                    | 0                   | 0                    |
| <b>seq553</b>  | Firmicutes    | Clostridia   | 0                   | 0                    | 0                   | 0                    |
| <b>seq963</b>  | Firmicutes    | Clostridia   | 0                   | 0                    | 0                   | 0                    |
| <b>seq1389</b> | Firmicutes    | Clostridia   | 0                   | 0                    | 0                   | 0                    |
| <b>seq1393</b> | Firmicutes    | Clostridia   | 0                   | 0                    | 0                   | 0                    |
| <b>seq735</b>  | Firmicutes    | Clostridia   | 0                   | 0                    | 0                   | 0                    |
| <b>seq944</b>  | Firmicutes    | Clostridia   | 0                   | 0                    | 0                   | 0                    |
| <b>seq1365</b> | Firmicutes    | Clostridia   | 0                   | 0                    | 0                   | 0                    |
| <b>seq1425</b> | Firmicutes    | Clostridia   | 0                   | 18                   | 0                   | 0                    |
| <b>seq1612</b> | Firmicutes    | Clostridia   | 0                   | 0                    | 0                   | 0                    |
| <b>seq1165</b> | Firmicutes    | Clostridia   | 0                   | 0                    | 0                   | 0                    |
| <b>seq1690</b> | Firmicutes    | Clostridia   | 0                   | 0                    | 0                   | 0                    |
| <b>seq1302</b> | Firmicutes    | Clostridia   | 0                   | 0                    | 0                   | 0                    |

Sequence Count Table

|                | <b>Phylum</b> | <b>Class</b> | <b>Subject31WK0</b> | <b>Subject31WK12</b> | <b>Subject32WK0</b> | <b>Subject32WK12</b> |
|----------------|---------------|--------------|---------------------|----------------------|---------------------|----------------------|
| <b>seq734</b>  | Firmicutes    | Clostridia   | 0                   | 0                    | 0                   | 0                    |
| <b>seq739</b>  | Firmicutes    | Clostridia   | 0                   | 0                    | 0                   | 0                    |
| <b>seq755</b>  | Firmicutes    | Clostridia   | 0                   | 0                    | 0                   | 0                    |
| <b>seq771</b>  | Firmicutes    | Clostridia   | 0                   | 0                    | 0                   | 0                    |
| <b>seq776</b>  | Firmicutes    | Clostridia   | 0                   | 0                    | 292                 | 0                    |
| <b>seq807</b>  | Firmicutes    | Clostridia   | 0                   | 0                    | 0                   | 0                    |
| <b>seq817</b>  | Firmicutes    | Clostridia   | 0                   | 0                    | 0                   | 0                    |
| <b>seq962</b>  | Firmicutes    | Clostridia   | 0                   | 0                    | 0                   | 0                    |
| <b>seq1038</b> | Firmicutes    | Clostridia   | 0                   | 0                    | 0                   | 0                    |
| <b>seq1044</b> | Firmicutes    | Clostridia   | 0                   | 0                    | 0                   | 0                    |
| <b>seq1079</b> | Firmicutes    | Clostridia   | 0                   | 0                    | 0                   | 0                    |
| <b>seq1117</b> | Firmicutes    | Clostridia   | 0                   | 0                    | 0                   | 0                    |
| <b>seq1133</b> | Firmicutes    | Clostridia   | 0                   | 0                    | 0                   | 0                    |
| <b>seq1136</b> | Firmicutes    | Clostridia   | 0                   | 0                    | 0                   | 0                    |
| <b>seq1170</b> | Firmicutes    | Clostridia   | 0                   | 0                    | 0                   | 0                    |
| <b>seq1217</b> | Firmicutes    | Clostridia   | 0                   | 0                    | 0                   | 0                    |
| <b>seq161</b>  | Firmicutes    | Clostridia   | 0                   | 0                    | 41                  | 0                    |
| <b>seq495</b>  | Firmicutes    | Clostridia   | 0                   | 0                    | 0                   | 0                    |
| <b>seq826</b>  | Firmicutes    | Clostridia   | 0                   | 0                    | 0                   | 0                    |
| <b>seq1486</b> | Firmicutes    | Clostridia   | 0                   | 0                    | 0                   | 0                    |
| <b>seq553</b>  | Firmicutes    | Clostridia   | 0                   | 0                    | 0                   | 0                    |
| <b>seq963</b>  | Firmicutes    | Clostridia   | 0                   | 0                    | 0                   | 0                    |
| <b>seq1389</b> | Firmicutes    | Clostridia   | 0                   | 0                    | 0                   | 0                    |
| <b>seq1393</b> | Firmicutes    | Clostridia   | 0                   | 0                    | 0                   | 0                    |
| <b>seq735</b>  | Firmicutes    | Clostridia   | 0                   | 0                    | 0                   | 0                    |
| <b>seq944</b>  | Firmicutes    | Clostridia   | 0                   | 0                    | 0                   | 0                    |
| <b>seq1365</b> | Firmicutes    | Clostridia   | 0                   | 0                    | 0                   | 0                    |
| <b>seq1425</b> | Firmicutes    | Clostridia   | 0                   | 0                    | 0                   | 0                    |
| <b>seq1612</b> | Firmicutes    | Clostridia   | 0                   | 0                    | 0                   | 0                    |
| <b>seq1165</b> | Firmicutes    | Clostridia   | 0                   | 0                    | 0                   | 0                    |
| <b>seq1690</b> | Firmicutes    | Clostridia   | 0                   | 0                    | 0                   | 0                    |
| <b>seq1302</b> | Firmicutes    | Clostridia   | 0                   | 0                    | 0                   | 0                    |

Sequence Count Table

|                | <b>Phylum</b> | <b>Class</b> | <b>Subject13WK0</b> | <b>Subject13WK12</b> | <b>Subject39WK0</b> | <b>Subject39WK12</b> |
|----------------|---------------|--------------|---------------------|----------------------|---------------------|----------------------|
| <b>seq734</b>  | Firmicutes    | Clostridia   | 0                   | 0                    | 0                   | 0                    |
| <b>seq739</b>  | Firmicutes    | Clostridia   | 0                   | 0                    | 0                   | 0                    |
| <b>seq755</b>  | Firmicutes    | Clostridia   | 0                   | 0                    | 0                   | 0                    |
| <b>seq771</b>  | Firmicutes    | Clostridia   | 0                   | 0                    | 0                   | 0                    |
| <b>seq776</b>  | Firmicutes    | Clostridia   | 0                   | 0                    | 0                   | 0                    |
| <b>seq807</b>  | Firmicutes    | Clostridia   | 62                  | 99                   | 0                   | 0                    |
| <b>seq817</b>  | Firmicutes    | Clostridia   | 0                   | 255                  | 0                   | 0                    |
| <b>seq962</b>  | Firmicutes    | Clostridia   | 0                   | 0                    | 0                   | 0                    |
| <b>seq1038</b> | Firmicutes    | Clostridia   | 0                   | 0                    | 0                   | 0                    |
| <b>seq1044</b> | Firmicutes    | Clostridia   | 0                   | 0                    | 0                   | 0                    |
| <b>seq1079</b> | Firmicutes    | Clostridia   | 0                   | 0                    | 0                   | 0                    |
| <b>seq1117</b> | Firmicutes    | Clostridia   | 0                   | 0                    | 0                   | 0                    |
| <b>seq1133</b> | Firmicutes    | Clostridia   | 0                   | 0                    | 0                   | 0                    |
| <b>seq1136</b> | Firmicutes    | Clostridia   | 0                   | 0                    | 0                   | 0                    |
| <b>seq1170</b> | Firmicutes    | Clostridia   | 0                   | 0                    | 0                   | 0                    |
| <b>seq1217</b> | Firmicutes    | Clostridia   | 0                   | 0                    | 0                   | 0                    |
| <b>seq161</b>  | Firmicutes    | Clostridia   | 23                  | 0                    | 0                   | 50                   |
| <b>seq495</b>  | Firmicutes    | Clostridia   | 0                   | 0                    | 0                   | 0                    |
| <b>seq826</b>  | Firmicutes    | Clostridia   | 0                   | 0                    | 0                   | 0                    |
| <b>seq1486</b> | Firmicutes    | Clostridia   | 0                   | 0                    | 0                   | 0                    |
| <b>seq553</b>  | Firmicutes    | Clostridia   | 0                   | 0                    | 0                   | 0                    |
| <b>seq963</b>  | Firmicutes    | Clostridia   | 0                   | 0                    | 0                   | 0                    |
| <b>seq1389</b> | Firmicutes    | Clostridia   | 0                   | 0                    | 0                   | 0                    |
| <b>seq1393</b> | Firmicutes    | Clostridia   | 0                   | 19                   | 0                   | 0                    |
| <b>seq735</b>  | Firmicutes    | Clostridia   | 127                 | 42                   | 0                   | 0                    |
| <b>seq944</b>  | Firmicutes    | Clostridia   | 0                   | 12                   | 0                   | 0                    |
| <b>seq1365</b> | Firmicutes    | Clostridia   | 0                   | 0                    | 0                   | 0                    |
| <b>seq1425</b> | Firmicutes    | Clostridia   | 0                   | 0                    | 0                   | 0                    |
| <b>seq1612</b> | Firmicutes    | Clostridia   | 0                   | 0                    | 0                   | 0                    |
| <b>seq1165</b> | Firmicutes    | Clostridia   | 0                   | 0                    | 0                   | 0                    |
| <b>seq1690</b> | Firmicutes    | Clostridia   | 0                   | 0                    | 0                   | 0                    |
| <b>seq1302</b> | Firmicutes    | Clostridia   | 0                   | 29                   | 0                   | 0                    |



Sequence Count Table

|                | <b>Phylum</b> | <b>Class</b> | <b>Subject26WK0</b> | <b>Subject26WK12</b> | <b>Subject14WK0</b> | <b>Subject14WK12</b> |
|----------------|---------------|--------------|---------------------|----------------------|---------------------|----------------------|
| <b>seq734</b>  | Firmicutes    | Clostridia   | 0                   | 0                    | 0                   | 0                    |
| <b>seq739</b>  | Firmicutes    | Clostridia   | 0                   | 0                    | 0                   | 0                    |
| <b>seq755</b>  | Firmicutes    | Clostridia   | 0                   | 0                    | 0                   | 0                    |
| <b>seq771</b>  | Firmicutes    | Clostridia   | 0                   | 0                    | 0                   | 0                    |
| <b>seq776</b>  | Firmicutes    | Clostridia   | 0                   | 0                    | 0                   | 0                    |
| <b>seq807</b>  | Firmicutes    | Clostridia   | 0                   | 0                    | 0                   | 0                    |
| <b>seq817</b>  | Firmicutes    | Clostridia   | 0                   | 0                    | 0                   | 0                    |
| <b>seq962</b>  | Firmicutes    | Clostridia   | 0                   | 0                    | 0                   | 0                    |
| <b>seq1038</b> | Firmicutes    | Clostridia   | 0                   | 0                    | 0                   | 0                    |
| <b>seq1044</b> | Firmicutes    | Clostridia   | 0                   | 0                    | 0                   | 0                    |
| <b>seq1079</b> | Firmicutes    | Clostridia   | 0                   | 0                    | 0                   | 0                    |
| <b>seq1117</b> | Firmicutes    | Clostridia   | 0                   | 0                    | 0                   | 0                    |
| <b>seq1133</b> | Firmicutes    | Clostridia   | 0                   | 0                    | 0                   | 0                    |
| <b>seq1136</b> | Firmicutes    | Clostridia   | 0                   | 0                    | 0                   | 0                    |
| <b>seq1170</b> | Firmicutes    | Clostridia   | 0                   | 0                    | 0                   | 0                    |
| <b>seq1217</b> | Firmicutes    | Clostridia   | 0                   | 0                    | 0                   | 0                    |
| <b>seq161</b>  | Firmicutes    | Clostridia   | 159                 | 459                  | 19                  | 32                   |
| <b>seq495</b>  | Firmicutes    | Clostridia   | 103                 | 152                  | 0                   | 0                    |
| <b>seq826</b>  | Firmicutes    | Clostridia   | 0                   | 0                    | 0                   | 0                    |
| <b>seq1486</b> | Firmicutes    | Clostridia   | 0                   | 0                    | 0                   | 0                    |
| <b>seq553</b>  | Firmicutes    | Clostridia   | 0                   | 0                    | 0                   | 0                    |
| <b>seq963</b>  | Firmicutes    | Clostridia   | 0                   | 0                    | 0                   | 0                    |
| <b>seq1389</b> | Firmicutes    | Clostridia   | 0                   | 0                    | 0                   | 0                    |
| <b>seq1393</b> | Firmicutes    | Clostridia   | 0                   | 0                    | 0                   | 0                    |
| <b>seq735</b>  | Firmicutes    | Clostridia   | 0                   | 0                    | 0                   | 30                   |
| <b>seq944</b>  | Firmicutes    | Clostridia   | 0                   | 0                    | 0                   | 0                    |
| <b>seq1365</b> | Firmicutes    | Clostridia   | 15                  | 14                   | 0                   | 0                    |
| <b>seq1425</b> | Firmicutes    | Clostridia   | 0                   | 0                    | 0                   | 0                    |
| <b>seq1612</b> | Firmicutes    | Clostridia   | 9                   | 0                    | 0                   | 0                    |
| <b>seq1165</b> | Firmicutes    | Clostridia   | 0                   | 0                    | 0                   | 0                    |
| <b>seq1690</b> | Firmicutes    | Clostridia   | 0                   | 0                    | 0                   | 0                    |
| <b>seq1302</b> | Firmicutes    | Clostridia   | 0                   | 0                    | 0                   | 0                    |

Sequence Count Table

|                | <b>Phylum</b> | <b>Class</b> | <b>Subject27WK0</b> | <b>Subject27WK12</b> | <b>Subject15WK0</b> | <b>Subject15WK12</b> |
|----------------|---------------|--------------|---------------------|----------------------|---------------------|----------------------|
| <b>seq734</b>  | Firmicutes    | Clostridia   | 0                   | 0                    | 0                   | 0                    |
| <b>seq739</b>  | Firmicutes    | Clostridia   | 235                 | 94                   | 0                   | 0                    |
| <b>seq755</b>  | Firmicutes    | Clostridia   | 0                   | 0                    | 0                   | 311                  |
| <b>seq771</b>  | Firmicutes    | Clostridia   | 0                   | 0                    | 0                   | 0                    |
| <b>seq776</b>  | Firmicutes    | Clostridia   | 0                   | 0                    | 0                   | 0                    |
| <b>seq807</b>  | Firmicutes    | Clostridia   | 0                   | 0                    | 0                   | 0                    |
| <b>seq817</b>  | Firmicutes    | Clostridia   | 0                   | 0                    | 0                   | 0                    |
| <b>seq962</b>  | Firmicutes    | Clostridia   | 0                   | 0                    | 0                   | 0                    |
| <b>seq1038</b> | Firmicutes    | Clostridia   | 0                   | 0                    | 0                   | 0                    |
| <b>seq1044</b> | Firmicutes    | Clostridia   | 0                   | 0                    | 0                   | 0                    |
| <b>seq1079</b> | Firmicutes    | Clostridia   | 0                   | 0                    | 0                   | 0                    |
| <b>seq1117</b> | Firmicutes    | Clostridia   | 0                   | 0                    | 0                   | 0                    |
| <b>seq1133</b> | Firmicutes    | Clostridia   | 0                   | 0                    | 0                   | 0                    |
| <b>seq1136</b> | Firmicutes    | Clostridia   | 0                   | 97                   | 0                   | 0                    |
| <b>seq1170</b> | Firmicutes    | Clostridia   | 0                   | 0                    | 0                   | 0                    |
| <b>seq1217</b> | Firmicutes    | Clostridia   | 0                   | 0                    | 0                   | 0                    |
| <b>seq161</b>  | Firmicutes    | Clostridia   | 95                  | 79                   | 49                  | 46                   |
| <b>seq495</b>  | Firmicutes    | Clostridia   | 0                   | 0                    | 0                   | 0                    |
| <b>seq826</b>  | Firmicutes    | Clostridia   | 23                  | 24                   | 0                   | 0                    |
| <b>seq1486</b> | Firmicutes    | Clostridia   | 0                   | 0                    | 0                   | 0                    |
| <b>seq553</b>  | Firmicutes    | Clostridia   | 0                   | 0                    | 0                   | 0                    |
| <b>seq963</b>  | Firmicutes    | Clostridia   | 0                   | 0                    | 0                   | 0                    |
| <b>seq1389</b> | Firmicutes    | Clostridia   | 0                   | 0                    | 0                   | 0                    |
| <b>seq1393</b> | Firmicutes    | Clostridia   | 0                   | 0                    | 0                   | 0                    |
| <b>seq735</b>  | Firmicutes    | Clostridia   | 0                   | 0                    | 0                   | 0                    |
| <b>seq944</b>  | Firmicutes    | Clostridia   | 0                   | 0                    | 0                   | 0                    |
| <b>seq1365</b> | Firmicutes    | Clostridia   | 0                   | 0                    | 0                   | 0                    |
| <b>seq1425</b> | Firmicutes    | Clostridia   | 0                   | 0                    | 0                   | 0                    |
| <b>seq1612</b> | Firmicutes    | Clostridia   | 0                   | 0                    | 0                   | 0                    |
| <b>seq1165</b> | Firmicutes    | Clostridia   | 0                   | 0                    | 0                   | 0                    |
| <b>seq1690</b> | Firmicutes    | Clostridia   | 0                   | 0                    | 0                   | 0                    |
| <b>seq1302</b> | Firmicutes    | Clostridia   | 0                   | 0                    | 0                   | 0                    |

Sequence Count Table

|                | <b>Phylum</b> | <b>Class</b> | <b>Δ</b> |  |  |  |
|----------------|---------------|--------------|----------|--|--|--|
| <b>seq734</b>  | Firmicutes    | Clostridia   |          |  |  |  |
| <b>seq739</b>  | Firmicutes    | Clostridia   |          |  |  |  |
| <b>seq755</b>  | Firmicutes    | Clostridia   |          |  |  |  |
| <b>seq771</b>  | Firmicutes    | Clostridia   |          |  |  |  |
| <b>seq776</b>  | Firmicutes    | Clostridia   |          |  |  |  |
| <b>seq807</b>  | Firmicutes    | Clostridia   |          |  |  |  |
| <b>seq817</b>  | Firmicutes    | Clostridia   |          |  |  |  |
| <b>seq962</b>  | Firmicutes    | Clostridia   |          |  |  |  |
| <b>seq1038</b> | Firmicutes    | Clostridia   |          |  |  |  |
| <b>seq1044</b> | Firmicutes    | Clostridia   |          |  |  |  |
| <b>seq1079</b> | Firmicutes    | Clostridia   |          |  |  |  |
| <b>seq1117</b> | Firmicutes    | Clostridia   |          |  |  |  |
| <b>seq1133</b> | Firmicutes    | Clostridia   |          |  |  |  |
| <b>seq1136</b> | Firmicutes    | Clostridia   |          |  |  |  |
| <b>seq1170</b> | Firmicutes    | Clostridia   |          |  |  |  |
| <b>seq1217</b> | Firmicutes    | Clostridia   |          |  |  |  |
| <b>seq161</b>  | Firmicutes    | Clostridia   |          |  |  |  |
| <b>seq495</b>  | Firmicutes    | Clostridia   |          |  |  |  |
| <b>seq826</b>  | Firmicutes    | Clostridia   |          |  |  |  |
| <b>seq1486</b> | Firmicutes    | Clostridia   |          |  |  |  |
| <b>seq553</b>  | Firmicutes    | Clostridia   |          |  |  |  |
| <b>seq963</b>  | Firmicutes    | Clostridia   |          |  |  |  |
| <b>seq1389</b> | Firmicutes    | Clostridia   |          |  |  |  |
| <b>seq1393</b> | Firmicutes    | Clostridia   |          |  |  |  |
| <b>seq735</b>  | Firmicutes    | Clostridia   |          |  |  |  |
| <b>seq944</b>  | Firmicutes    | Clostridia   |          |  |  |  |
| <b>seq1365</b> | Firmicutes    | Clostridia   |          |  |  |  |
| <b>seq1425</b> | Firmicutes    | Clostridia   |          |  |  |  |
| <b>seq1612</b> | Firmicutes    | Clostridia   |          |  |  |  |
| <b>seq1165</b> | Firmicutes    | Clostridia   |          |  |  |  |
| <b>seq1690</b> | Firmicutes    | Clostridia   |          |  |  |  |
| <b>seq1302</b> | Firmicutes    | Clostridia   |          |  |  |  |

Sequence Count Table

|                | <b>Phylum</b> | <b>Class</b> | <b>Order</b>  | <b>Family</b>   |
|----------------|---------------|--------------|---------------|-----------------|
| <b>seq1829</b> | Firmicutes    | Clostridia   | Clostridiales | Ruminococcaceae |
| <b>seq311</b>  | Firmicutes    | Clostridia   | Clostridiales | Ruminococcaceae |
| <b>seq410</b>  | Firmicutes    | Clostridia   | Clostridiales | Ruminococcaceae |
| <b>seq783</b>  | Firmicutes    | Clostridia   | Clostridiales | Ruminococcaceae |
| <b>seq792</b>  | Firmicutes    | Clostridia   | Clostridiales | Ruminococcaceae |
| <b>seq913</b>  | Firmicutes    | Clostridia   | Clostridiales | Ruminococcaceae |
| <b>seq984</b>  | Firmicutes    | Clostridia   | Clostridiales | Ruminococcaceae |
| <b>seq1078</b> | Firmicutes    | Clostridia   | Clostridiales | Ruminococcaceae |
| <b>seq1650</b> | Firmicutes    | Clostridia   | Clostridiales | Ruminococcaceae |
| <b>seq1771</b> | Firmicutes    | Clostridia   | Clostridiales | Ruminococcaceae |
| <b>seq113</b>  | Firmicutes    | Clostridia   | Clostridiales | Ruminococcaceae |
| <b>seq303</b>  | Firmicutes    | Clostridia   | Clostridiales | Ruminococcaceae |
| <b>seq422</b>  | Firmicutes    | Clostridia   | Clostridiales | Ruminococcaceae |
| <b>seq565</b>  | Firmicutes    | Clostridia   | Clostridiales | Ruminococcaceae |
| <b>seq880</b>  | Firmicutes    | Clostridia   | Clostridiales | Ruminococcaceae |
| <b>seq166</b>  | Firmicutes    | Clostridia   | Clostridiales | Ruminococcaceae |
| <b>seq418</b>  | Firmicutes    | Clostridia   | Clostridiales | Ruminococcaceae |
| <b>seq1006</b> | Firmicutes    | Clostridia   | Clostridiales | Ruminococcaceae |
| <b>seq1401</b> | Firmicutes    | Clostridia   | Clostridiales | Ruminococcaceae |
| <b>seq1459</b> | Firmicutes    | Clostridia   | Clostridiales | Ruminococcaceae |
| <b>seq1599</b> | Firmicutes    | Clostridia   | Clostridiales | Ruminococcaceae |
| <b>seq1707</b> | Firmicutes    | Clostridia   | Clostridiales | Ruminococcaceae |
| <b>seq1749</b> | Firmicutes    | Clostridia   | Clostridiales | Ruminococcaceae |
| <b>seq477</b>  | Firmicutes    | Clostridia   | Clostridiales | Ruminococcaceae |
| <b>seq620</b>  | Firmicutes    | Clostridia   | Clostridiales | Ruminococcaceae |
| <b>seq1603</b> | Firmicutes    | Clostridia   | Clostridiales | Ruminococcaceae |
| <b>seq1709</b> | Firmicutes    | Clostridia   | Clostridiales | Ruminococcaceae |
| <b>seq471</b>  | Firmicutes    | Clostridia   | Clostridiales | Ruminococcaceae |
| <b>seq1515</b> | Firmicutes    | Clostridia   | Clostridiales | Ruminococcaceae |
| <b>seq1773</b> | Firmicutes    | Clostridia   | Clostridiales | Ruminococcaceae |
| <b>seq1708</b> | Firmicutes    | Clostridia   | Clostridiales | Ruminococcaceae |
| <b>seq56</b>   | Firmicutes    | Clostridia   | Clostridiales | Ruminococcaceae |

Sequence Count Table

|                | <b>Phylum</b> | <b>Class</b> | <b>Genus</b>             | <b>Species</b>    |
|----------------|---------------|--------------|--------------------------|-------------------|
| <b>seq1829</b> | Firmicutes    | Clostridia   | Hydrogenoanaerobacterium |                   |
| <b>seq311</b>  | Firmicutes    | Clostridia   | Intestinimonas           |                   |
| <b>seq410</b>  | Firmicutes    | Clostridia   | Intestinimonas           |                   |
| <b>seq783</b>  | Firmicutes    | Clostridia   | Intestinimonas           | massiliensis      |
| <b>seq792</b>  | Firmicutes    | Clostridia   | Intestinimonas           | butyriciproducens |
| <b>seq913</b>  | Firmicutes    | Clostridia   | Intestinimonas           |                   |
| <b>seq984</b>  | Firmicutes    | Clostridia   | Intestinimonas           |                   |
| <b>seq1078</b> | Firmicutes    | Clostridia   | Intestinimonas           |                   |
| <b>seq1650</b> | Firmicutes    | Clostridia   | Intestinimonas           |                   |
| <b>seq1771</b> | Firmicutes    | Clostridia   | Intestinimonas           |                   |
| <b>seq113</b>  | Firmicutes    | Clostridia   | Negativibacillus         |                   |
| <b>seq303</b>  | Firmicutes    | Clostridia   | Negativibacillus         | massiliensis      |
| <b>seq422</b>  | Firmicutes    | Clostridia   | Negativibacillus         |                   |
| <b>seq565</b>  | Firmicutes    | Clostridia   | Negativibacillus         |                   |
| <b>seq880</b>  | Firmicutes    | Clostridia   | Negativibacillus         |                   |
| <b>seq166</b>  | Firmicutes    | Clostridia   | Oscilibacter             |                   |
| <b>seq418</b>  | Firmicutes    | Clostridia   | Oscilibacter             |                   |
| <b>seq1006</b> | Firmicutes    | Clostridia   | Oscilibacter             |                   |
| <b>seq1401</b> | Firmicutes    | Clostridia   | Oscilibacter             |                   |
| <b>seq1459</b> | Firmicutes    | Clostridia   | Oscilibacter             |                   |
| <b>seq1599</b> | Firmicutes    | Clostridia   | Oscilibacter             |                   |
| <b>seq1707</b> | Firmicutes    | Clostridia   | Oscilibacter             |                   |
| <b>seq1749</b> | Firmicutes    | Clostridia   | Oscilibacter             |                   |
| <b>seq477</b>  | Firmicutes    | Clostridia   | Oscillospira             |                   |
| <b>seq620</b>  | Firmicutes    | Clostridia   | Oscillospira             |                   |
| <b>seq1603</b> | Firmicutes    | Clostridia   | Oscillospira             |                   |
| <b>seq1709</b> | Firmicutes    | Clostridia   | Oscillospira             |                   |
| <b>seq471</b>  | Firmicutes    | Clostridia   | Phoceia                  | massiliensis      |
| <b>seq1515</b> | Firmicutes    | Clostridia   | Phoceia                  |                   |
| <b>seq1773</b> | Firmicutes    | Clostridia   | Ruminiclostridium        |                   |
| <b>seq1708</b> | Firmicutes    | Clostridia   | Ruminiclostridium_1      |                   |
| <b>seq56</b>   | Firmicutes    | Clostridia   | Ruminiclostridium_5      |                   |

Sequence Count Table

|                | <b>Phylum</b> | <b>Class</b> | <b>Subject34WK0</b> | <b>Subject34WK12</b> | <b>Subject16WK0</b> | <b>Subject16WK12</b> |
|----------------|---------------|--------------|---------------------|----------------------|---------------------|----------------------|
| <b>seq1829</b> | Firmicutes    | Clostridia   | 0                   | 0                    | 0                   | 0                    |
| <b>seq311</b>  | Firmicutes    | Clostridia   | 0                   | 0                    | 13                  | 29                   |
| <b>seq410</b>  | Firmicutes    | Clostridia   | 0                   | 0                    | 0                   | 0                    |
| <b>seq783</b>  | Firmicutes    | Clostridia   | 0                   | 0                    | 0                   | 0                    |
| <b>seq792</b>  | Firmicutes    | Clostridia   | 19                  | 66                   | 0                   | 0                    |
| <b>seq913</b>  | Firmicutes    | Clostridia   | 0                   | 0                    | 0                   | 0                    |
| <b>seq984</b>  | Firmicutes    | Clostridia   | 0                   | 0                    | 0                   | 0                    |
| <b>seq1078</b> | Firmicutes    | Clostridia   | 0                   | 0                    | 0                   | 0                    |
| <b>seq1650</b> | Firmicutes    | Clostridia   | 0                   | 0                    | 0                   | 0                    |
| <b>seq1771</b> | Firmicutes    | Clostridia   | 0                   | 0                    | 0                   | 0                    |
| <b>seq113</b>  | Firmicutes    | Clostridia   | 94                  | 133                  | 267                 | 129                  |
| <b>seq303</b>  | Firmicutes    | Clostridia   | 0                   | 0                    | 0                   | 0                    |
| <b>seq422</b>  | Firmicutes    | Clostridia   | 0                   | 0                    | 0                   | 0                    |
| <b>seq565</b>  | Firmicutes    | Clostridia   | 0                   | 0                    | 0                   | 0                    |
| <b>seq880</b>  | Firmicutes    | Clostridia   | 0                   | 0                    | 0                   | 0                    |
| <b>seq166</b>  | Firmicutes    | Clostridia   | 0                   | 21                   | 0                   | 0                    |
| <b>seq418</b>  | Firmicutes    | Clostridia   | 0                   | 0                    | 0                   | 0                    |
| <b>seq1006</b> | Firmicutes    | Clostridia   | 0                   | 0                    | 0                   | 15                   |
| <b>seq1401</b> | Firmicutes    | Clostridia   | 0                   | 0                    | 0                   | 0                    |
| <b>seq1459</b> | Firmicutes    | Clostridia   | 0                   | 0                    | 0                   | 0                    |
| <b>seq1599</b> | Firmicutes    | Clostridia   | 0                   | 0                    | 0                   | 0                    |
| <b>seq1707</b> | Firmicutes    | Clostridia   | 0                   | 0                    | 0                   | 0                    |
| <b>seq1749</b> | Firmicutes    | Clostridia   | 0                   | 0                    | 0                   | 0                    |
| <b>seq477</b>  | Firmicutes    | Clostridia   | 0                   | 0                    | 0                   | 0                    |
| <b>seq620</b>  | Firmicutes    | Clostridia   | 0                   | 0                    | 0                   | 0                    |
| <b>seq1603</b> | Firmicutes    | Clostridia   | 0                   | 0                    | 0                   | 0                    |
| <b>seq1709</b> | Firmicutes    | Clostridia   | 0                   | 0                    | 0                   | 0                    |
| <b>seq471</b>  | Firmicutes    | Clostridia   | 0                   | 0                    | 10                  | 0                    |
| <b>seq1515</b> | Firmicutes    | Clostridia   | 0                   | 0                    | 0                   | 0                    |
| <b>seq1773</b> | Firmicutes    | Clostridia   | 0                   | 0                    | 0                   | 0                    |
| <b>seq1708</b> | Firmicutes    | Clostridia   | 0                   | 0                    | 0                   | 0                    |
| <b>seq56</b>   | Firmicutes    | Clostridia   | 21                  | 305                  | 268                 | 210                  |

Sequence Count Table

|                | <b>Phylum</b> | <b>Class</b> | <b>Subject17WK0</b> | <b>Subject17WK12</b> | <b>Subject1WK0</b> | <b>Subject1WK12</b> |
|----------------|---------------|--------------|---------------------|----------------------|--------------------|---------------------|
| <b>seq1829</b> | Firmicutes    | Clostridia   | 0                   | 0                    | 0                  | 0                   |
| <b>seq311</b>  | Firmicutes    | Clostridia   | 0                   | 24                   | 40                 | 31                  |
| <b>seq410</b>  | Firmicutes    | Clostridia   | 0                   | 0                    | 0                  | 0                   |
| <b>seq783</b>  | Firmicutes    | Clostridia   | 0                   | 0                    | 0                  | 0                   |
| <b>seq792</b>  | Firmicutes    | Clostridia   | 0                   | 0                    | 0                  | 10                  |
| <b>seq913</b>  | Firmicutes    | Clostridia   | 0                   | 0                    | 0                  | 0                   |
| <b>seq984</b>  | Firmicutes    | Clostridia   | 0                   | 0                    | 20                 | 40                  |
| <b>seq1078</b> | Firmicutes    | Clostridia   | 0                   | 0                    | 0                  | 0                   |
| <b>seq1650</b> | Firmicutes    | Clostridia   | 0                   | 0                    | 0                  | 0                   |
| <b>seq1771</b> | Firmicutes    | Clostridia   | 0                   | 0                    | 0                  | 0                   |
| <b>seq113</b>  | Firmicutes    | Clostridia   | 324                 | 651                  | 0                  | 0                   |
| <b>seq303</b>  | Firmicutes    | Clostridia   | 0                   | 0                    | 71                 | 93                  |
| <b>seq422</b>  | Firmicutes    | Clostridia   | 0                   | 0                    | 0                  | 0                   |
| <b>seq565</b>  | Firmicutes    | Clostridia   | 0                   | 0                    | 0                  | 0                   |
| <b>seq880</b>  | Firmicutes    | Clostridia   | 0                   | 0                    | 0                  | 0                   |
| <b>seq166</b>  | Firmicutes    | Clostridia   | 85                  | 122                  | 104                | 98                  |
| <b>seq418</b>  | Firmicutes    | Clostridia   | 32                  | 25                   | 15                 | 24                  |
| <b>seq1006</b> | Firmicutes    | Clostridia   | 0                   | 0                    | 0                  | 0                   |
| <b>seq1401</b> | Firmicutes    | Clostridia   | 0                   | 0                    | 0                  | 0                   |
| <b>seq1459</b> | Firmicutes    | Clostridia   | 0                   | 0                    | 0                  | 0                   |
| <b>seq1599</b> | Firmicutes    | Clostridia   | 0                   | 0                    | 0                  | 0                   |
| <b>seq1707</b> | Firmicutes    | Clostridia   | 0                   | 0                    | 0                  | 0                   |
| <b>seq1749</b> | Firmicutes    | Clostridia   | 0                   | 0                    | 0                  | 0                   |
| <b>seq477</b>  | Firmicutes    | Clostridia   | 0                   | 0                    | 0                  | 0                   |
| <b>seq620</b>  | Firmicutes    | Clostridia   | 0                   | 0                    | 0                  | 0                   |
| <b>seq1603</b> | Firmicutes    | Clostridia   | 0                   | 0                    | 0                  | 0                   |
| <b>seq1709</b> | Firmicutes    | Clostridia   | 0                   | 0                    | 0                  | 0                   |
| <b>seq471</b>  | Firmicutes    | Clostridia   | 0                   | 12                   | 13                 | 0                   |
| <b>seq1515</b> | Firmicutes    | Clostridia   | 0                   | 0                    | 0                  | 0                   |
| <b>seq1773</b> | Firmicutes    | Clostridia   | 0                   | 0                    | 0                  | 0                   |
| <b>seq1708</b> | Firmicutes    | Clostridia   | 0                   | 0                    | 0                  | 0                   |
| <b>seq56</b>   | Firmicutes    | Clostridia   | 859                 | 1330                 | 950                | 976                 |

Sequence Count Table

|                | <b>Phylum</b> | <b>Class</b> | <b>Subject2WK0</b> | <b>Subject2WK12</b> | <b>Subject3WK0</b> | <b>Subject3WK12</b> |
|----------------|---------------|--------------|--------------------|---------------------|--------------------|---------------------|
| <b>seq1829</b> | Firmicutes    | Clostridia   | 0                  | 0                   | 0                  | 0                   |
| <b>seq311</b>  | Firmicutes    | Clostridia   | 25                 | 66                  | 89                 | 0                   |
| <b>seq410</b>  | Firmicutes    | Clostridia   | 0                  | 0                   | 0                  | 0                   |
| <b>seq783</b>  | Firmicutes    | Clostridia   | 0                  | 0                   | 0                  | 0                   |
| <b>seq792</b>  | Firmicutes    | Clostridia   | 0                  | 0                   | 0                  | 0                   |
| <b>seq913</b>  | Firmicutes    | Clostridia   | 0                  | 0                   | 0                  | 0                   |
| <b>seq984</b>  | Firmicutes    | Clostridia   | 0                  | 0                   | 0                  | 0                   |
| <b>seq1078</b> | Firmicutes    | Clostridia   | 0                  | 0                   | 0                  | 0                   |
| <b>seq1650</b> | Firmicutes    | Clostridia   | 0                  | 0                   | 0                  | 0                   |
| <b>seq1771</b> | Firmicutes    | Clostridia   | 0                  | 0                   | 0                  | 0                   |
| <b>seq113</b>  | Firmicutes    | Clostridia   | 0                  | 0                   | 0                  | 0                   |
| <b>seq303</b>  | Firmicutes    | Clostridia   | 0                  | 0                   | 0                  | 0                   |
| <b>seq422</b>  | Firmicutes    | Clostridia   | 0                  | 0                   | 0                  | 0                   |
| <b>seq565</b>  | Firmicutes    | Clostridia   | 0                  | 0                   | 0                  | 0                   |
| <b>seq880</b>  | Firmicutes    | Clostridia   | 0                  | 0                   | 0                  | 0                   |
| <b>seq166</b>  | Firmicutes    | Clostridia   | 196                | 379                 | 120                | 73                  |
| <b>seq418</b>  | Firmicutes    | Clostridia   | 40                 | 69                  | 0                  | 0                   |
| <b>seq1006</b> | Firmicutes    | Clostridia   | 0                  | 0                   | 0                  | 0                   |
| <b>seq1401</b> | Firmicutes    | Clostridia   | 0                  | 0                   | 0                  | 0                   |
| <b>seq1459</b> | Firmicutes    | Clostridia   | 0                  | 0                   | 0                  | 0                   |
| <b>seq1599</b> | Firmicutes    | Clostridia   | 0                  | 0                   | 0                  | 0                   |
| <b>seq1707</b> | Firmicutes    | Clostridia   | 0                  | 0                   | 0                  | 0                   |
| <b>seq1749</b> | Firmicutes    | Clostridia   | 0                  | 0                   | 0                  | 0                   |
| <b>seq477</b>  | Firmicutes    | Clostridia   | 23                 | 23                  | 0                  | 0                   |
| <b>seq620</b>  | Firmicutes    | Clostridia   | 0                  | 0                   | 0                  | 0                   |
| <b>seq1603</b> | Firmicutes    | Clostridia   | 0                  | 0                   | 0                  | 0                   |
| <b>seq1709</b> | Firmicutes    | Clostridia   | 0                  | 0                   | 0                  | 0                   |
| <b>seq471</b>  | Firmicutes    | Clostridia   | 0                  | 0                   | 22                 | 24                  |
| <b>seq1515</b> | Firmicutes    | Clostridia   | 0                  | 0                   | 0                  | 0                   |
| <b>seq1773</b> | Firmicutes    | Clostridia   | 0                  | 0                   | 0                  | 0                   |
| <b>seq1708</b> | Firmicutes    | Clostridia   | 0                  | 0                   | 0                  | 0                   |
| <b>seq56</b>   | Firmicutes    | Clostridia   | 545                | 139                 | 0                  | 0                   |



Sequence Count Table

|                | <b>Phylum</b> | <b>Class</b> | <b>Subject4WK0</b> | <b>Subject4WK12</b> | <b>Subject5WK0</b> | <b>Subject5WK12</b> |
|----------------|---------------|--------------|--------------------|---------------------|--------------------|---------------------|
| <b>seq1829</b> | Firmicutes    | Clostridia   | 0                  | 0                   | 0                  | 0                   |
| <b>seq311</b>  | Firmicutes    | Clostridia   | 56                 | 241                 | 32                 | 39                  |
| <b>seq410</b>  | Firmicutes    | Clostridia   | 0                  | 0                   | 0                  | 0                   |
| <b>seq783</b>  | Firmicutes    | Clostridia   | 18                 | 0                   | 0                  | 0                   |
| <b>seq792</b>  | Firmicutes    | Clostridia   | 23                 | 27                  | 25                 | 14                  |
| <b>seq913</b>  | Firmicutes    | Clostridia   | 0                  | 0                   | 0                  | 19                  |
| <b>seq984</b>  | Firmicutes    | Clostridia   | 0                  | 0                   | 0                  | 0                   |
| <b>seq1078</b> | Firmicutes    | Clostridia   | 0                  | 0                   | 0                  | 0                   |
| <b>seq1650</b> | Firmicutes    | Clostridia   | 0                  | 0                   | 0                  | 0                   |
| <b>seq1771</b> | Firmicutes    | Clostridia   | 0                  | 0                   | 0                  | 0                   |
| <b>seq113</b>  | Firmicutes    | Clostridia   | 84                 | 904                 | 0                  | 0                   |
| <b>seq303</b>  | Firmicutes    | Clostridia   | 0                  | 0                   | 43                 | 397                 |
| <b>seq422</b>  | Firmicutes    | Clostridia   | 0                  | 0                   | 0                  | 0                   |
| <b>seq565</b>  | Firmicutes    | Clostridia   | 0                  | 0                   | 0                  | 0                   |
| <b>seq880</b>  | Firmicutes    | Clostridia   | 0                  | 0                   | 0                  | 0                   |
| <b>seq166</b>  | Firmicutes    | Clostridia   | 169                | 233                 | 170                | 181                 |
| <b>seq418</b>  | Firmicutes    | Clostridia   | 32                 | 40                  | 16                 | 29                  |
| <b>seq1006</b> | Firmicutes    | Clostridia   | 0                  | 0                   | 0                  | 0                   |
| <b>seq1401</b> | Firmicutes    | Clostridia   | 0                  | 0                   | 0                  | 0                   |
| <b>seq1459</b> | Firmicutes    | Clostridia   | 0                  | 20                  | 0                  | 0                   |
| <b>seq1599</b> | Firmicutes    | Clostridia   | 0                  | 0                   | 0                  | 0                   |
| <b>seq1707</b> | Firmicutes    | Clostridia   | 0                  | 0                   | 0                  | 0                   |
| <b>seq1749</b> | Firmicutes    | Clostridia   | 0                  | 0                   | 0                  | 0                   |
| <b>seq477</b>  | Firmicutes    | Clostridia   | 50                 | 200                 | 0                  | 0                   |
| <b>seq620</b>  | Firmicutes    | Clostridia   | 0                  | 0                   | 0                  | 0                   |
| <b>seq1603</b> | Firmicutes    | Clostridia   | 0                  | 0                   | 0                  | 0                   |
| <b>seq1709</b> | Firmicutes    | Clostridia   | 0                  | 0                   | 0                  | 0                   |
| <b>seq471</b>  | Firmicutes    | Clostridia   | 0                  | 44                  | 22                 | 18                  |
| <b>seq1515</b> | Firmicutes    | Clostridia   | 0                  | 0                   | 0                  | 0                   |
| <b>seq1773</b> | Firmicutes    | Clostridia   | 0                  | 0                   | 0                  | 0                   |
| <b>seq1708</b> | Firmicutes    | Clostridia   | 0                  | 0                   | 0                  | 0                   |
| <b>seq56</b>   | Firmicutes    | Clostridia   | 461                | 440                 | 0                  | 0                   |

Sequence Count Table

|                | <b>Phylum</b> | <b>Class</b> | <b>Subject6WK0</b> | <b>Subject6WK12</b> | <b>Subject18WK0</b> | <b>Subject18WK12</b> |
|----------------|---------------|--------------|--------------------|---------------------|---------------------|----------------------|
| <b>seq1829</b> | Firmicutes    | Clostridia   | 0                  | 0                   | 0                   | 0                    |
| <b>seq311</b>  | Firmicutes    | Clostridia   | 22                 | 63                  | 40                  | 17                   |
| <b>seq410</b>  | Firmicutes    | Clostridia   | 276                | 228                 | 0                   | 0                    |
| <b>seq783</b>  | Firmicutes    | Clostridia   | 0                  | 8                   | 0                   | 0                    |
| <b>seq792</b>  | Firmicutes    | Clostridia   | 0                  | 7                   | 17                  | 0                    |
| <b>seq913</b>  | Firmicutes    | Clostridia   | 0                  | 0                   | 0                   | 0                    |
| <b>seq984</b>  | Firmicutes    | Clostridia   | 0                  | 0                   | 0                   | 0                    |
| <b>seq1078</b> | Firmicutes    | Clostridia   | 0                  | 0                   | 0                   | 0                    |
| <b>seq1650</b> | Firmicutes    | Clostridia   | 0                  | 0                   | 0                   | 0                    |
| <b>seq1771</b> | Firmicutes    | Clostridia   | 0                  | 0                   | 0                   | 0                    |
| <b>seq113</b>  | Firmicutes    | Clostridia   | 136                | 179                 | 474                 | 117                  |
| <b>seq303</b>  | Firmicutes    | Clostridia   | 0                  | 0                   | 0                   | 0                    |
| <b>seq422</b>  | Firmicutes    | Clostridia   | 0                  | 0                   | 0                   | 0                    |
| <b>seq565</b>  | Firmicutes    | Clostridia   | 0                  | 0                   | 0                   | 0                    |
| <b>seq880</b>  | Firmicutes    | Clostridia   | 0                  | 0                   | 0                   | 0                    |
| <b>seq166</b>  | Firmicutes    | Clostridia   | 47                 | 86                  | 218                 | 87                   |
| <b>seq418</b>  | Firmicutes    | Clostridia   | 8                  | 16                  | 108                 | 43                   |
| <b>seq1006</b> | Firmicutes    | Clostridia   | 0                  | 0                   | 0                   | 0                    |
| <b>seq1401</b> | Firmicutes    | Clostridia   | 0                  | 0                   | 0                   | 0                    |
| <b>seq1459</b> | Firmicutes    | Clostridia   | 0                  | 0                   | 0                   | 0                    |
| <b>seq1599</b> | Firmicutes    | Clostridia   | 0                  | 0                   | 0                   | 0                    |
| <b>seq1707</b> | Firmicutes    | Clostridia   | 12                 | 0                   | 0                   | 0                    |
| <b>seq1749</b> | Firmicutes    | Clostridia   | 0                  | 0                   | 0                   | 0                    |
| <b>seq477</b>  | Firmicutes    | Clostridia   | 0                  | 22                  | 0                   | 0                    |
| <b>seq620</b>  | Firmicutes    | Clostridia   | 0                  | 0                   | 0                   | 0                    |
| <b>seq1603</b> | Firmicutes    | Clostridia   | 12                 | 7                   | 0                   | 0                    |
| <b>seq1709</b> | Firmicutes    | Clostridia   | 12                 | 0                   | 0                   | 0                    |
| <b>seq471</b>  | Firmicutes    | Clostridia   | 0                  | 0                   | 18                  | 23                   |
| <b>seq1515</b> | Firmicutes    | Clostridia   | 0                  | 0                   | 0                   | 0                    |
| <b>seq1773</b> | Firmicutes    | Clostridia   | 0                  | 0                   | 0                   | 0                    |
| <b>seq1708</b> | Firmicutes    | Clostridia   | 12                 | 0                   | 0                   | 0                    |
| <b>seq56</b>   | Firmicutes    | Clostridia   | 399                | 506                 | 0                   | 0                    |

Sequence Count Table

|                | <b>Phylum</b> | <b>Class</b> | <b>Subject19WK0</b> | <b>Subject19WK12</b> | <b>Subject20WK0</b> | <b>Subject20WK12</b> |
|----------------|---------------|--------------|---------------------|----------------------|---------------------|----------------------|
| <b>seq1829</b> | Firmicutes    | Clostridia   | 0                   | 0                    | 0                   | 0                    |
| <b>seq311</b>  | Firmicutes    | Clostridia   | 99                  | 148                  | 22                  | 25                   |
| <b>seq410</b>  | Firmicutes    | Clostridia   | 0                   | 0                    | 255                 | 446                  |
| <b>seq783</b>  | Firmicutes    | Clostridia   | 0                   | 0                    | 0                   | 0                    |
| <b>seq792</b>  | Firmicutes    | Clostridia   | 0                   | 0                    | 0                   | 0                    |
| <b>seq913</b>  | Firmicutes    | Clostridia   | 0                   | 0                    | 0                   | 0                    |
| <b>seq984</b>  | Firmicutes    | Clostridia   | 0                   | 0                    | 0                   | 0                    |
| <b>seq1078</b> | Firmicutes    | Clostridia   | 0                   | 0                    | 0                   | 0                    |
| <b>seq1650</b> | Firmicutes    | Clostridia   | 0                   | 0                    | 0                   | 0                    |
| <b>seq1771</b> | Firmicutes    | Clostridia   | 0                   | 0                    | 0                   | 0                    |
| <b>seq113</b>  | Firmicutes    | Clostridia   | 0                   | 0                    | 0                   | 0                    |
| <b>seq303</b>  | Firmicutes    | Clostridia   | 0                   | 0                    | 0                   | 0                    |
| <b>seq422</b>  | Firmicutes    | Clostridia   | 0                   | 0                    | 0                   | 0                    |
| <b>seq565</b>  | Firmicutes    | Clostridia   | 0                   | 0                    | 0                   | 0                    |
| <b>seq880</b>  | Firmicutes    | Clostridia   | 0                   | 0                    | 38                  | 170                  |
| <b>seq166</b>  | Firmicutes    | Clostridia   | 214                 | 610                  | 13                  | 73                   |
| <b>seq418</b>  | Firmicutes    | Clostridia   | 0                   | 0                    | 0                   | 14                   |
| <b>seq1006</b> | Firmicutes    | Clostridia   | 0                   | 0                    | 0                   | 22                   |
| <b>seq1401</b> | Firmicutes    | Clostridia   | 0                   | 0                    | 24                  | 17                   |
| <b>seq1459</b> | Firmicutes    | Clostridia   | 0                   | 0                    | 0                   | 0                    |
| <b>seq1599</b> | Firmicutes    | Clostridia   | 0                   | 0                    | 0                   | 0                    |
| <b>seq1707</b> | Firmicutes    | Clostridia   | 0                   | 0                    | 0                   | 0                    |
| <b>seq1749</b> | Firmicutes    | Clostridia   | 0                   | 0                    | 0                   | 0                    |
| <b>seq477</b>  | Firmicutes    | Clostridia   | 0                   | 0                    | 0                   | 0                    |
| <b>seq620</b>  | Firmicutes    | Clostridia   | 0                   | 0                    | 0                   | 0                    |
| <b>seq1603</b> | Firmicutes    | Clostridia   | 0                   | 0                    | 0                   | 0                    |
| <b>seq1709</b> | Firmicutes    | Clostridia   | 0                   | 0                    | 0                   | 0                    |
| <b>seq471</b>  | Firmicutes    | Clostridia   | 33                  | 114                  | 0                   | 7                    |
| <b>seq1515</b> | Firmicutes    | Clostridia   | 0                   | 0                    | 0                   | 0                    |
| <b>seq1773</b> | Firmicutes    | Clostridia   | 0                   | 0                    | 0                   | 0                    |
| <b>seq1708</b> | Firmicutes    | Clostridia   | 0                   | 0                    | 0                   | 0                    |
| <b>seq56</b>   | Firmicutes    | Clostridia   | 0                   | 0                    | 1238                | 683                  |

Sequence Count Table

|                | <b>Phylum</b> | <b>Class</b> | <b>Subject7WK0</b> | <b>Subject7WK12</b> | <b>Subject21WK0</b> | <b>Subject21WK12</b> |
|----------------|---------------|--------------|--------------------|---------------------|---------------------|----------------------|
| <b>seq1829</b> | Firmicutes    | Clostridia   | 0                  | 0                   | 0                   | 0                    |
| <b>seq311</b>  | Firmicutes    | Clostridia   | 0                  | 16                  | 15                  | 12                   |
| <b>seq410</b>  | Firmicutes    | Clostridia   | 0                  | 0                   | 0                   | 0                    |
| <b>seq783</b>  | Firmicutes    | Clostridia   | 9                  | 17                  | 0                   | 0                    |
| <b>seq792</b>  | Firmicutes    | Clostridia   | 0                  | 0                   | 0                   | 0                    |
| <b>seq913</b>  | Firmicutes    | Clostridia   | 0                  | 0                   | 0                   | 0                    |
| <b>seq984</b>  | Firmicutes    | Clostridia   | 0                  | 0                   | 0                   | 0                    |
| <b>seq1078</b> | Firmicutes    | Clostridia   | 0                  | 0                   | 0                   | 0                    |
| <b>seq1650</b> | Firmicutes    | Clostridia   | 0                  | 0                   | 0                   | 0                    |
| <b>seq1771</b> | Firmicutes    | Clostridia   | 0                  | 0                   | 0                   | 0                    |
| <b>seq113</b>  | Firmicutes    | Clostridia   | 0                  | 0                   | 1525                | 2666                 |
| <b>seq303</b>  | Firmicutes    | Clostridia   | 57                 | 71                  | 0                   | 0                    |
| <b>seq422</b>  | Firmicutes    | Clostridia   | 0                  | 0                   | 0                   | 0                    |
| <b>seq565</b>  | Firmicutes    | Clostridia   | 0                  | 0                   | 0                   | 0                    |
| <b>seq880</b>  | Firmicutes    | Clostridia   | 0                  | 0                   | 0                   | 0                    |
| <b>seq166</b>  | Firmicutes    | Clostridia   | 228                | 122                 | 114                 | 414                  |
| <b>seq418</b>  | Firmicutes    | Clostridia   | 48                 | 44                  | 0                   | 36                   |
| <b>seq1006</b> | Firmicutes    | Clostridia   | 0                  | 0                   | 0                   | 0                    |
| <b>seq1401</b> | Firmicutes    | Clostridia   | 0                  | 0                   | 0                   | 0                    |
| <b>seq1459</b> | Firmicutes    | Clostridia   | 0                  | 0                   | 0                   | 0                    |
| <b>seq1599</b> | Firmicutes    | Clostridia   | 0                  | 0                   | 0                   | 0                    |
| <b>seq1707</b> | Firmicutes    | Clostridia   | 0                  | 0                   | 0                   | 0                    |
| <b>seq1749</b> | Firmicutes    | Clostridia   | 6                  | 0                   | 0                   | 0                    |
| <b>seq477</b>  | Firmicutes    | Clostridia   | 36                 | 29                  | 0                   | 0                    |
| <b>seq620</b>  | Firmicutes    | Clostridia   | 158                | 326                 | 0                   | 0                    |
| <b>seq1603</b> | Firmicutes    | Clostridia   | 0                  | 0                   | 0                   | 0                    |
| <b>seq1709</b> | Firmicutes    | Clostridia   | 0                  | 0                   | 0                   | 0                    |
| <b>seq471</b>  | Firmicutes    | Clostridia   | 25                 | 45                  | 42                  | 173                  |
| <b>seq1515</b> | Firmicutes    | Clostridia   | 0                  | 0                   | 0                   | 0                    |
| <b>seq1773</b> | Firmicutes    | Clostridia   | 0                  | 0                   | 0                   | 0                    |
| <b>seq1708</b> | Firmicutes    | Clostridia   | 0                  | 0                   | 0                   | 0                    |
| <b>seq56</b>   | Firmicutes    | Clostridia   | 2065               | 1262                | 980                 | 7                    |

Sequence Count Table

|                | <b>Phylum</b> | <b>Class</b> | <b>Subject8WK0</b> | <b>Subject8WK12</b> | <b>Subject9WK0</b> | <b>Subject9WK12</b> |
|----------------|---------------|--------------|--------------------|---------------------|--------------------|---------------------|
| <b>seq1829</b> | Firmicutes    | Clostridia   | 0                  | 0                   | 0                  | 0                   |
| <b>seq311</b>  | Firmicutes    | Clostridia   | 0                  | 0                   | 68                 | 0                   |
| <b>seq410</b>  | Firmicutes    | Clostridia   | 0                  | 0                   | 0                  | 0                   |
| <b>seq783</b>  | Firmicutes    | Clostridia   | 0                  | 0                   | 0                  | 0                   |
| <b>seq792</b>  | Firmicutes    | Clostridia   | 0                  | 0                   | 0                  | 0                   |
| <b>seq913</b>  | Firmicutes    | Clostridia   | 0                  | 12                  | 0                  | 0                   |
| <b>seq984</b>  | Firmicutes    | Clostridia   | 0                  | 0                   | 0                  | 0                   |
| <b>seq1078</b> | Firmicutes    | Clostridia   | 0                  | 0                   | 0                  | 0                   |
| <b>seq1650</b> | Firmicutes    | Clostridia   | 0                  | 0                   | 0                  | 0                   |
| <b>seq1771</b> | Firmicutes    | Clostridia   | 0                  | 9                   | 0                  | 0                   |
| <b>seq113</b>  | Firmicutes    | Clostridia   | 191                | 116                 | 0                  | 0                   |
| <b>seq303</b>  | Firmicutes    | Clostridia   | 0                  | 0                   | 0                  | 0                   |
| <b>seq422</b>  | Firmicutes    | Clostridia   | 0                  | 0                   | 60                 | 0                   |
| <b>seq565</b>  | Firmicutes    | Clostridia   | 0                  | 0                   | 0                  | 0                   |
| <b>seq880</b>  | Firmicutes    | Clostridia   | 0                  | 0                   | 0                  | 0                   |
| <b>seq166</b>  | Firmicutes    | Clostridia   | 202                | 86                  | 223                | 37                  |
| <b>seq418</b>  | Firmicutes    | Clostridia   | 33                 | 29                  | 21                 | 0                   |
| <b>seq1006</b> | Firmicutes    | Clostridia   | 0                  | 0                   | 0                  | 0                   |
| <b>seq1401</b> | Firmicutes    | Clostridia   | 0                  | 0                   | 0                  | 0                   |
| <b>seq1459</b> | Firmicutes    | Clostridia   | 0                  | 0                   | 0                  | 0                   |
| <b>seq1599</b> | Firmicutes    | Clostridia   | 0                  | 0                   | 0                  | 0                   |
| <b>seq1707</b> | Firmicutes    | Clostridia   | 0                  | 0                   | 0                  | 0                   |
| <b>seq1749</b> | Firmicutes    | Clostridia   | 0                  | 0                   | 0                  | 0                   |
| <b>seq477</b>  | Firmicutes    | Clostridia   | 14                 | 10                  | 25                 | 0                   |
| <b>seq620</b>  | Firmicutes    | Clostridia   | 0                  | 0                   | 0                  | 0                   |
| <b>seq1603</b> | Firmicutes    | Clostridia   | 0                  | 0                   | 0                  | 0                   |
| <b>seq1709</b> | Firmicutes    | Clostridia   | 0                  | 0                   | 0                  | 0                   |
| <b>seq471</b>  | Firmicutes    | Clostridia   | 23                 | 29                  | 0                  | 0                   |
| <b>seq1515</b> | Firmicutes    | Clostridia   | 0                  | 0                   | 0                  | 0                   |
| <b>seq1773</b> | Firmicutes    | Clostridia   | 0                  | 0                   | 0                  | 0                   |
| <b>seq1708</b> | Firmicutes    | Clostridia   | 0                  | 0                   | 0                  | 0                   |
| <b>seq56</b>   | Firmicutes    | Clostridia   | 153                | 2236                | 165                | 104                 |

Sequence Count Table

|                | <b>Phylum</b> | <b>Class</b> | <b>Subject10WK0</b> | <b>Subject10WK12</b> | <b>Subject22WK0</b> | <b>Subject22WK12</b> |
|----------------|---------------|--------------|---------------------|----------------------|---------------------|----------------------|
| <b>seq1829</b> | Firmicutes    | Clostridia   | 0                   | 0                    | 6                   | 0                    |
| <b>seq311</b>  | Firmicutes    | Clostridia   | 57                  | 22                   | 80                  | 89                   |
| <b>seq410</b>  | Firmicutes    | Clostridia   | 0                   | 0                    | 0                   | 0                    |
| <b>seq783</b>  | Firmicutes    | Clostridia   | 4                   | 0                    | 0                   | 0                    |
| <b>seq792</b>  | Firmicutes    | Clostridia   | 40                  | 5                    | 0                   | 0                    |
| <b>seq913</b>  | Firmicutes    | Clostridia   | 0                   | 0                    | 0                   | 0                    |
| <b>seq984</b>  | Firmicutes    | Clostridia   | 0                   | 0                    | 12                  | 21                   |
| <b>seq1078</b> | Firmicutes    | Clostridia   | 0                   | 0                    | 0                   | 0                    |
| <b>seq1650</b> | Firmicutes    | Clostridia   | 0                   | 0                    | 0                   | 0                    |
| <b>seq1771</b> | Firmicutes    | Clostridia   | 0                   | 0                    | 0                   | 0                    |
| <b>seq113</b>  | Firmicutes    | Clostridia   | 0                   | 0                    | 0                   | 0                    |
| <b>seq303</b>  | Firmicutes    | Clostridia   | 738                 | 240                  | 107                 | 49                   |
| <b>seq422</b>  | Firmicutes    | Clostridia   | 0                   | 0                    | 212                 | 59                   |
| <b>seq565</b>  | Firmicutes    | Clostridia   | 0                   | 0                    | 0                   | 0                    |
| <b>seq880</b>  | Firmicutes    | Clostridia   | 0                   | 0                    | 0                   | 0                    |
| <b>seq166</b>  | Firmicutes    | Clostridia   | 245                 | 138                  | 21                  | 23                   |
| <b>seq418</b>  | Firmicutes    | Clostridia   | 60                  | 11                   | 29                  | 13                   |
| <b>seq1006</b> | Firmicutes    | Clostridia   | 0                   | 0                    | 0                   | 0                    |
| <b>seq1401</b> | Firmicutes    | Clostridia   | 0                   | 0                    | 0                   | 0                    |
| <b>seq1459</b> | Firmicutes    | Clostridia   | 0                   | 0                    | 0                   | 5                    |
| <b>seq1599</b> | Firmicutes    | Clostridia   | 0                   | 0                    | 0                   | 0                    |
| <b>seq1707</b> | Firmicutes    | Clostridia   | 0                   | 0                    | 0                   | 0                    |
| <b>seq1749</b> | Firmicutes    | Clostridia   | 0                   | 0                    | 0                   | 0                    |
| <b>seq477</b>  | Firmicutes    | Clostridia   | 52                  | 40                   | 17                  | 27                   |
| <b>seq620</b>  | Firmicutes    | Clostridia   | 0                   | 0                    | 0                   | 0                    |
| <b>seq1603</b> | Firmicutes    | Clostridia   | 0                   | 0                    | 0                   | 0                    |
| <b>seq1709</b> | Firmicutes    | Clostridia   | 0                   | 0                    | 0                   | 0                    |
| <b>seq471</b>  | Firmicutes    | Clostridia   | 0                   | 0                    | 0                   | 0                    |
| <b>seq1515</b> | Firmicutes    | Clostridia   | 17                  | 0                    | 0                   | 0                    |
| <b>seq1773</b> | Firmicutes    | Clostridia   | 0                   | 0                    | 9                   | 0                    |
| <b>seq1708</b> | Firmicutes    | Clostridia   | 0                   | 0                    | 0                   | 0                    |
| <b>seq56</b>   | Firmicutes    | Clostridia   | 0                   | 0                    | 114                 | 156                  |

Sequence Count Table

|                | <b>Phylum</b> | <b>Class</b> | <b>Subject23WK0</b> | <b>Subject23WK12</b> | <b>Subject24WK0</b> | <b>Subject24WK12</b> |
|----------------|---------------|--------------|---------------------|----------------------|---------------------|----------------------|
| <b>seq1829</b> | Firmicutes    | Clostridia   | 0                   | 0                    | 0                   | 0                    |
| <b>seq311</b>  | Firmicutes    | Clostridia   | 64                  | 78                   | 0                   | 0                    |
| <b>seq410</b>  | Firmicutes    | Clostridia   | 0                   | 0                    | 0                   | 0                    |
| <b>seq783</b>  | Firmicutes    | Clostridia   | 10                  | 20                   | 0                   | 0                    |
| <b>seq792</b>  | Firmicutes    | Clostridia   | 0                   | 0                    | 0                   | 0                    |
| <b>seq913</b>  | Firmicutes    | Clostridia   | 0                   | 0                    | 0                   | 0                    |
| <b>seq984</b>  | Firmicutes    | Clostridia   | 19                  | 25                   | 11                  | 0                    |
| <b>seq1078</b> | Firmicutes    | Clostridia   | 0                   | 0                    | 0                   | 0                    |
| <b>seq1650</b> | Firmicutes    | Clostridia   | 0                   | 0                    | 0                   | 16                   |
| <b>seq1771</b> | Firmicutes    | Clostridia   | 0                   | 0                    | 0                   | 0                    |
| <b>seq113</b>  | Firmicutes    | Clostridia   | 153                 | 315                  | 0                   | 0                    |
| <b>seq303</b>  | Firmicutes    | Clostridia   | 0                   | 0                    | 0                   | 0                    |
| <b>seq422</b>  | Firmicutes    | Clostridia   | 0                   | 0                    | 155                 | 127                  |
| <b>seq565</b>  | Firmicutes    | Clostridia   | 0                   | 0                    | 0                   | 0                    |
| <b>seq880</b>  | Firmicutes    | Clostridia   | 0                   | 0                    | 0                   | 0                    |
| <b>seq166</b>  | Firmicutes    | Clostridia   | 59                  | 91                   | 14                  | 25                   |
| <b>seq418</b>  | Firmicutes    | Clostridia   | 0                   | 27                   | 7                   | 57                   |
| <b>seq1006</b> | Firmicutes    | Clostridia   | 0                   | 0                    | 0                   | 0                    |
| <b>seq1401</b> | Firmicutes    | Clostridia   | 0                   | 0                    | 0                   | 0                    |
| <b>seq1459</b> | Firmicutes    | Clostridia   | 0                   | 0                    | 0                   | 0                    |
| <b>seq1599</b> | Firmicutes    | Clostridia   | 0                   | 0                    | 0                   | 0                    |
| <b>seq1707</b> | Firmicutes    | Clostridia   | 0                   | 0                    | 0                   | 0                    |
| <b>seq1749</b> | Firmicutes    | Clostridia   | 0                   | 0                    | 0                   | 0                    |
| <b>seq477</b>  | Firmicutes    | Clostridia   | 46                  | 63                   | 0                   | 16                   |
| <b>seq620</b>  | Firmicutes    | Clostridia   | 0                   | 0                    | 0                   | 0                    |
| <b>seq1603</b> | Firmicutes    | Clostridia   | 0                   | 0                    | 0                   | 0                    |
| <b>seq1709</b> | Firmicutes    | Clostridia   | 0                   | 0                    | 0                   | 0                    |
| <b>seq471</b>  | Firmicutes    | Clostridia   | 10                  | 10                   | 16                  | 25                   |
| <b>seq1515</b> | Firmicutes    | Clostridia   | 0                   | 0                    | 0                   | 0                    |
| <b>seq1773</b> | Firmicutes    | Clostridia   | 0                   | 0                    | 0                   | 0                    |
| <b>seq1708</b> | Firmicutes    | Clostridia   | 0                   | 0                    | 0                   | 0                    |
| <b>seq56</b>   | Firmicutes    | Clostridia   | 0                   | 177                  | 2245                | 1779                 |

Sequence Count Table

|                | <b>Phylum</b> | <b>Class</b> | <b>Subject11WK0</b> | <b>Subject11WK12</b> | <b>Subject12WK0</b> | <b>Subject12WK12</b> |
|----------------|---------------|--------------|---------------------|----------------------|---------------------|----------------------|
| <b>seq1829</b> | Firmicutes    | Clostridia   | 0                   | 0                    | 0                   | 0                    |
| <b>seq311</b>  | Firmicutes    | Clostridia   | 0                   | 0                    | 0                   | 18                   |
| <b>seq410</b>  | Firmicutes    | Clostridia   | 0                   | 0                    | 0                   | 0                    |
| <b>seq783</b>  | Firmicutes    | Clostridia   | 9                   | 0                    | 0                   | 0                    |
| <b>seq792</b>  | Firmicutes    | Clostridia   | 0                   | 0                    | 0                   | 0                    |
| <b>seq913</b>  | Firmicutes    | Clostridia   | 0                   | 0                    | 0                   | 0                    |
| <b>seq984</b>  | Firmicutes    | Clostridia   | 0                   | 0                    | 0                   | 0                    |
| <b>seq1078</b> | Firmicutes    | Clostridia   | 0                   | 0                    | 0                   | 0                    |
| <b>seq1650</b> | Firmicutes    | Clostridia   | 0                   | 0                    | 0                   | 0                    |
| <b>seq1771</b> | Firmicutes    | Clostridia   | 0                   | 0                    | 0                   | 0                    |
| <b>seq113</b>  | Firmicutes    | Clostridia   | 575                 | 321                  | 0                   | 0                    |
| <b>seq303</b>  | Firmicutes    | Clostridia   | 0                   | 0                    | 0                   | 0                    |
| <b>seq422</b>  | Firmicutes    | Clostridia   | 0                   | 0                    | 0                   | 0                    |
| <b>seq565</b>  | Firmicutes    | Clostridia   | 429                 | 186                  | 0                   | 0                    |
| <b>seq880</b>  | Firmicutes    | Clostridia   | 0                   | 0                    | 0                   | 0                    |
| <b>seq166</b>  | Firmicutes    | Clostridia   | 350                 | 148                  | 21                  | 44                   |
| <b>seq418</b>  | Firmicutes    | Clostridia   | 30                  | 7                    | 0                   | 11                   |
| <b>seq1006</b> | Firmicutes    | Clostridia   | 0                   | 0                    | 0                   | 0                    |
| <b>seq1401</b> | Firmicutes    | Clostridia   | 0                   | 0                    | 0                   | 0                    |
| <b>seq1459</b> | Firmicutes    | Clostridia   | 0                   | 0                    | 0                   | 0                    |
| <b>seq1599</b> | Firmicutes    | Clostridia   | 0                   | 0                    | 0                   | 0                    |
| <b>seq1707</b> | Firmicutes    | Clostridia   | 0                   | 0                    | 0                   | 0                    |
| <b>seq1749</b> | Firmicutes    | Clostridia   | 0                   | 0                    | 0                   | 0                    |
| <b>seq477</b>  | Firmicutes    | Clostridia   | 0                   | 0                    | 0                   | 0                    |
| <b>seq620</b>  | Firmicutes    | Clostridia   | 0                   | 0                    | 0                   | 0                    |
| <b>seq1603</b> | Firmicutes    | Clostridia   | 0                   | 0                    | 0                   | 0                    |
| <b>seq1709</b> | Firmicutes    | Clostridia   | 0                   | 0                    | 0                   | 0                    |
| <b>seq471</b>  | Firmicutes    | Clostridia   | 29                  | 6                    | 0                   | 19                   |
| <b>seq1515</b> | Firmicutes    | Clostridia   | 0                   | 0                    | 0                   | 0                    |
| <b>seq1773</b> | Firmicutes    | Clostridia   | 0                   | 0                    | 0                   | 0                    |
| <b>seq1708</b> | Firmicutes    | Clostridia   | 0                   | 0                    | 0                   | 0                    |
| <b>seq56</b>   | Firmicutes    | Clostridia   | 0                   | 0                    | 335                 | 336                  |



Sequence Count Table

|                | <b>Phylum</b> | <b>Class</b> | <b>Subject25WK0</b> | <b>Subject25WK12</b> | <b>Subject38WK0</b> | <b>Subject38WK12</b> |
|----------------|---------------|--------------|---------------------|----------------------|---------------------|----------------------|
| <b>seq1829</b> | Firmicutes    | Clostridia   | 0                   | 0                    | 0                   | 0                    |
| <b>seq311</b>  | Firmicutes    | Clostridia   | 0                   | 0                    | 0                   | 0                    |
| <b>seq410</b>  | Firmicutes    | Clostridia   | 0                   | 0                    | 0                   | 0                    |
| <b>seq783</b>  | Firmicutes    | Clostridia   | 0                   | 0                    | 0                   | 0                    |
| <b>seq792</b>  | Firmicutes    | Clostridia   | 0                   | 0                    | 0                   | 0                    |
| <b>seq913</b>  | Firmicutes    | Clostridia   | 0                   | 0                    | 0                   | 0                    |
| <b>seq984</b>  | Firmicutes    | Clostridia   | 0                   | 0                    | 0                   | 0                    |
| <b>seq1078</b> | Firmicutes    | Clostridia   | 0                   | 0                    | 0                   | 0                    |
| <b>seq1650</b> | Firmicutes    | Clostridia   | 0                   | 0                    | 0                   | 0                    |
| <b>seq1771</b> | Firmicutes    | Clostridia   | 0                   | 0                    | 0                   | 0                    |
| <b>seq113</b>  | Firmicutes    | Clostridia   | 0                   | 0                    | 0                   | 0                    |
| <b>seq303</b>  | Firmicutes    | Clostridia   | 0                   | 0                    | 0                   | 0                    |
| <b>seq422</b>  | Firmicutes    | Clostridia   | 47                  | 0                    | 0                   | 0                    |
| <b>seq565</b>  | Firmicutes    | Clostridia   | 0                   | 0                    | 0                   | 0                    |
| <b>seq880</b>  | Firmicutes    | Clostridia   | 0                   | 0                    | 0                   | 0                    |
| <b>seq166</b>  | Firmicutes    | Clostridia   | 58                  | 19                   | 0                   | 0                    |
| <b>seq418</b>  | Firmicutes    | Clostridia   | 15                  | 0                    | 0                   | 0                    |
| <b>seq1006</b> | Firmicutes    | Clostridia   | 0                   | 0                    | 0                   | 0                    |
| <b>seq1401</b> | Firmicutes    | Clostridia   | 0                   | 0                    | 0                   | 0                    |
| <b>seq1459</b> | Firmicutes    | Clostridia   | 0                   | 0                    | 0                   | 0                    |
| <b>seq1599</b> | Firmicutes    | Clostridia   | 0                   | 0                    | 0                   | 0                    |
| <b>seq1707</b> | Firmicutes    | Clostridia   | 0                   | 0                    | 0                   | 0                    |
| <b>seq1749</b> | Firmicutes    | Clostridia   | 0                   | 0                    | 0                   | 0                    |
| <b>seq477</b>  | Firmicutes    | Clostridia   | 0                   | 0                    | 0                   | 0                    |
| <b>seq620</b>  | Firmicutes    | Clostridia   | 0                   | 0                    | 0                   | 0                    |
| <b>seq1603</b> | Firmicutes    | Clostridia   | 0                   | 0                    | 0                   | 0                    |
| <b>seq1709</b> | Firmicutes    | Clostridia   | 0                   | 0                    | 0                   | 0                    |
| <b>seq471</b>  | Firmicutes    | Clostridia   | 0                   | 0                    | 0                   | 0                    |
| <b>seq1515</b> | Firmicutes    | Clostridia   | 0                   | 0                    | 0                   | 0                    |
| <b>seq1773</b> | Firmicutes    | Clostridia   | 0                   | 0                    | 0                   | 0                    |
| <b>seq1708</b> | Firmicutes    | Clostridia   | 0                   | 0                    | 0                   | 0                    |
| <b>seq56</b>   | Firmicutes    | Clostridia   | 1268                | 1445                 | 0                   | 0                    |

Sequence Count Table

|                | <b>Phylum</b> | <b>Class</b> | <b>Subject31WK0</b> | <b>Subject31WK12</b> | <b>Subject32WK0</b> | <b>Subject32WK12</b> |
|----------------|---------------|--------------|---------------------|----------------------|---------------------|----------------------|
| <b>seq1829</b> | Firmicutes    | Clostridia   | 0                   | 0                    | 0                   | 0                    |
| <b>seq311</b>  | Firmicutes    | Clostridia   | 0                   | 0                    | 50                  | 0                    |
| <b>seq410</b>  | Firmicutes    | Clostridia   | 0                   | 0                    | 0                   | 0                    |
| <b>seq783</b>  | Firmicutes    | Clostridia   | 0                   | 0                    | 0                   | 0                    |
| <b>seq792</b>  | Firmicutes    | Clostridia   | 0                   | 0                    | 0                   | 0                    |
| <b>seq913</b>  | Firmicutes    | Clostridia   | 0                   | 0                    | 0                   | 0                    |
| <b>seq984</b>  | Firmicutes    | Clostridia   | 0                   | 0                    | 0                   | 0                    |
| <b>seq1078</b> | Firmicutes    | Clostridia   | 0                   | 0                    | 0                   | 0                    |
| <b>seq1650</b> | Firmicutes    | Clostridia   | 0                   | 0                    | 0                   | 0                    |
| <b>seq1771</b> | Firmicutes    | Clostridia   | 0                   | 0                    | 0                   | 0                    |
| <b>seq113</b>  | Firmicutes    | Clostridia   | 0                   | 0                    | 0                   | 0                    |
| <b>seq303</b>  | Firmicutes    | Clostridia   | 0                   | 0                    | 0                   | 0                    |
| <b>seq422</b>  | Firmicutes    | Clostridia   | 0                   | 0                    | 105                 | 0                    |
| <b>seq565</b>  | Firmicutes    | Clostridia   | 0                   | 0                    | 0                   | 0                    |
| <b>seq880</b>  | Firmicutes    | Clostridia   | 0                   | 0                    | 0                   | 0                    |
| <b>seq166</b>  | Firmicutes    | Clostridia   | 0                   | 0                    | 111                 | 0                    |
| <b>seq418</b>  | Firmicutes    | Clostridia   | 0                   | 0                    | 0                   | 0                    |
| <b>seq1006</b> | Firmicutes    | Clostridia   | 0                   | 0                    | 0                   | 0                    |
| <b>seq1401</b> | Firmicutes    | Clostridia   | 0                   | 0                    | 0                   | 0                    |
| <b>seq1459</b> | Firmicutes    | Clostridia   | 0                   | 0                    | 0                   | 0                    |
| <b>seq1599</b> | Firmicutes    | Clostridia   | 0                   | 0                    | 0                   | 0                    |
| <b>seq1707</b> | Firmicutes    | Clostridia   | 0                   | 0                    | 0                   | 0                    |
| <b>seq1749</b> | Firmicutes    | Clostridia   | 0                   | 0                    | 0                   | 0                    |
| <b>seq477</b>  | Firmicutes    | Clostridia   | 0                   | 0                    | 0                   | 0                    |
| <b>seq620</b>  | Firmicutes    | Clostridia   | 0                   | 0                    | 0                   | 0                    |
| <b>seq1603</b> | Firmicutes    | Clostridia   | 0                   | 0                    | 0                   | 0                    |
| <b>seq1709</b> | Firmicutes    | Clostridia   | 0                   | 0                    | 0                   | 0                    |
| <b>seq471</b>  | Firmicutes    | Clostridia   | 0                   | 0                    | 8                   | 0                    |
| <b>seq1515</b> | Firmicutes    | Clostridia   | 0                   | 0                    | 0                   | 0                    |
| <b>seq1773</b> | Firmicutes    | Clostridia   | 0                   | 0                    | 0                   | 0                    |
| <b>seq1708</b> | Firmicutes    | Clostridia   | 0                   | 0                    | 0                   | 0                    |
| <b>seq56</b>   | Firmicutes    | Clostridia   | 0                   | 0                    | 0                   | 0                    |

Sequence Count Table

|                | <b>Phylum</b> | <b>Class</b> | <b>Subject13WK0</b> | <b>Subject13WK12</b> | <b>Subject39WK0</b> | <b>Subject39WK12</b> |
|----------------|---------------|--------------|---------------------|----------------------|---------------------|----------------------|
| <b>seq1829</b> | Firmicutes    | Clostridia   | 0                   | 0                    | 0                   | 0                    |
| <b>seq311</b>  | Firmicutes    | Clostridia   | 25                  | 17                   | 0                   | 8                    |
| <b>seq410</b>  | Firmicutes    | Clostridia   | 0                   | 0                    | 0                   | 0                    |
| <b>seq783</b>  | Firmicutes    | Clostridia   | 107                 | 82                   | 0                   | 0                    |
| <b>seq792</b>  | Firmicutes    | Clostridia   | 0                   | 11                   | 0                   | 0                    |
| <b>seq913</b>  | Firmicutes    | Clostridia   | 0                   | 0                    | 0                   | 0                    |
| <b>seq984</b>  | Firmicutes    | Clostridia   | 0                   | 0                    | 0                   | 0                    |
| <b>seq1078</b> | Firmicutes    | Clostridia   | 0                   | 0                    | 0                   | 0                    |
| <b>seq1650</b> | Firmicutes    | Clostridia   | 0                   | 0                    | 0                   | 0                    |
| <b>seq1771</b> | Firmicutes    | Clostridia   | 0                   | 0                    | 0                   | 0                    |
| <b>seq113</b>  | Firmicutes    | Clostridia   | 0                   | 0                    | 0                   | 0                    |
| <b>seq303</b>  | Firmicutes    | Clostridia   | 194                 | 113                  | 0                   | 0                    |
| <b>seq422</b>  | Firmicutes    | Clostridia   | 83                  | 0                    | 0                   | 40                   |
| <b>seq565</b>  | Firmicutes    | Clostridia   | 0                   | 0                    | 0                   | 0                    |
| <b>seq880</b>  | Firmicutes    | Clostridia   | 0                   | 0                    | 0                   | 0                    |
| <b>seq166</b>  | Firmicutes    | Clostridia   | 95                  | 25                   | 0                   | 158                  |
| <b>seq418</b>  | Firmicutes    | Clostridia   | 0                   | 21                   | 0                   | 13                   |
| <b>seq1006</b> | Firmicutes    | Clostridia   | 0                   | 0                    | 0                   | 0                    |
| <b>seq1401</b> | Firmicutes    | Clostridia   | 0                   | 0                    | 0                   | 0                    |
| <b>seq1459</b> | Firmicutes    | Clostridia   | 0                   | 0                    | 0                   | 0                    |
| <b>seq1599</b> | Firmicutes    | Clostridia   | 20                  | 0                    | 0                   | 0                    |
| <b>seq1707</b> | Firmicutes    | Clostridia   | 0                   | 0                    | 0                   | 0                    |
| <b>seq1749</b> | Firmicutes    | Clostridia   | 0                   | 0                    | 0                   | 0                    |
| <b>seq477</b>  | Firmicutes    | Clostridia   | 43                  | 33                   | 0                   | 0                    |
| <b>seq620</b>  | Firmicutes    | Clostridia   | 16                  | 0                    | 0                   | 0                    |
| <b>seq1603</b> | Firmicutes    | Clostridia   | 0                   | 0                    | 0                   | 0                    |
| <b>seq1709</b> | Firmicutes    | Clostridia   | 0                   | 0                    | 0                   | 0                    |
| <b>seq471</b>  | Firmicutes    | Clostridia   | 0                   | 0                    | 0                   | 12                   |
| <b>seq1515</b> | Firmicutes    | Clostridia   | 0                   | 0                    | 0                   | 0                    |
| <b>seq1773</b> | Firmicutes    | Clostridia   | 0                   | 0                    | 0                   | 0                    |
| <b>seq1708</b> | Firmicutes    | Clostridia   | 0                   | 0                    | 0                   | 0                    |
| <b>seq56</b>   | Firmicutes    | Clostridia   | 697                 | 164                  | 0                   | 37                   |

Sequence Count Table

|                | <b>Phylum</b> | <b>Class</b> | <b>Subject26WK0</b> | <b>Subject26WK12</b> | <b>Subject14WK0</b> | <b>Subject14WK12</b> |
|----------------|---------------|--------------|---------------------|----------------------|---------------------|----------------------|
| <b>seq1829</b> | Firmicutes    | Clostridia   | 0                   | 0                    | 0                   | 0                    |
| <b>seq311</b>  | Firmicutes    | Clostridia   | 24                  | 97                   | 49                  | 118                  |
| <b>seq410</b>  | Firmicutes    | Clostridia   | 0                   | 0                    | 0                   | 0                    |
| <b>seq783</b>  | Firmicutes    | Clostridia   | 0                   | 0                    | 0                   | 0                    |
| <b>seq792</b>  | Firmicutes    | Clostridia   | 0                   | 16                   | 0                   | 0                    |
| <b>seq913</b>  | Firmicutes    | Clostridia   | 0                   | 156                  | 0                   | 0                    |
| <b>seq984</b>  | Firmicutes    | Clostridia   | 0                   | 0                    | 0                   | 0                    |
| <b>seq1078</b> | Firmicutes    | Clostridia   | 20                  | 93                   | 0                   | 0                    |
| <b>seq1650</b> | Firmicutes    | Clostridia   | 0                   | 0                    | 0                   | 0                    |
| <b>seq1771</b> | Firmicutes    | Clostridia   | 0                   | 0                    | 0                   | 0                    |
| <b>seq113</b>  | Firmicutes    | Clostridia   | 677                 | 1005                 | 0                   | 0                    |
| <b>seq303</b>  | Firmicutes    | Clostridia   | 0                   | 0                    | 0                   | 0                    |
| <b>seq422</b>  | Firmicutes    | Clostridia   | 0                   | 0                    | 179                 | 62                   |
| <b>seq565</b>  | Firmicutes    | Clostridia   | 0                   | 0                    | 0                   | 0                    |
| <b>seq880</b>  | Firmicutes    | Clostridia   | 0                   | 0                    | 0                   | 0                    |
| <b>seq166</b>  | Firmicutes    | Clostridia   | 36                  | 384                  | 81                  | 107                  |
| <b>seq418</b>  | Firmicutes    | Clostridia   | 0                   | 52                   | 18                  | 40                   |
| <b>seq1006</b> | Firmicutes    | Clostridia   | 0                   | 0                    | 0                   | 0                    |
| <b>seq1401</b> | Firmicutes    | Clostridia   | 0                   | 0                    | 0                   | 0                    |
| <b>seq1459</b> | Firmicutes    | Clostridia   | 0                   | 0                    | 0                   | 8                    |
| <b>seq1599</b> | Firmicutes    | Clostridia   | 0                   | 0                    | 0                   | 0                    |
| <b>seq1707</b> | Firmicutes    | Clostridia   | 0                   | 0                    | 0                   | 0                    |
| <b>seq1749</b> | Firmicutes    | Clostridia   | 0                   | 0                    | 0                   | 4                    |
| <b>seq477</b>  | Firmicutes    | Clostridia   | 0                   | 0                    | 29                  | 37                   |
| <b>seq620</b>  | Firmicutes    | Clostridia   | 0                   | 0                    | 0                   | 0                    |
| <b>seq1603</b> | Firmicutes    | Clostridia   | 0                   | 0                    | 0                   | 0                    |
| <b>seq1709</b> | Firmicutes    | Clostridia   | 0                   | 0                    | 0                   | 0                    |
| <b>seq471</b>  | Firmicutes    | Clostridia   | 0                   | 39                   | 0                   | 0                    |
| <b>seq1515</b> | Firmicutes    | Clostridia   | 0                   | 0                    | 6                   | 4                    |
| <b>seq1773</b> | Firmicutes    | Clostridia   | 0                   | 0                    | 0                   | 0                    |
| <b>seq1708</b> | Firmicutes    | Clostridia   | 0                   | 0                    | 0                   | 0                    |
| <b>seq56</b>   | Firmicutes    | Clostridia   | 560                 | 1270                 | 432                 | 455                  |

Sequence Count Table

|                | <b>Phylum</b> | <b>Class</b> | <b>Subject27WK0</b> | <b>Subject27WK12</b> | <b>Subject15WK0</b> | <b>Subject15WK12</b> |
|----------------|---------------|--------------|---------------------|----------------------|---------------------|----------------------|
| <b>seq1829</b> | Firmicutes    | Clostridia   | 0                   | 0                    | 0                   | 0                    |
| <b>seq311</b>  | Firmicutes    | Clostridia   | 18                  | 22                   | 11                  | 23                   |
| <b>seq410</b>  | Firmicutes    | Clostridia   | 0                   | 0                    | 0                   | 0                    |
| <b>seq783</b>  | Firmicutes    | Clostridia   | 0                   | 0                    | 0                   | 0                    |
| <b>seq792</b>  | Firmicutes    | Clostridia   | 0                   | 0                    | 0                   | 0                    |
| <b>seq913</b>  | Firmicutes    | Clostridia   | 0                   | 0                    | 0                   | 0                    |
| <b>seq984</b>  | Firmicutes    | Clostridia   | 0                   | 0                    | 0                   | 0                    |
| <b>seq1078</b> | Firmicutes    | Clostridia   | 0                   | 0                    | 0                   | 0                    |
| <b>seq1650</b> | Firmicutes    | Clostridia   | 0                   | 0                    | 0                   | 0                    |
| <b>seq1771</b> | Firmicutes    | Clostridia   | 0                   | 0                    | 0                   | 0                    |
| <b>seq113</b>  | Firmicutes    | Clostridia   | 471                 | 438                  | 97                  | 88                   |
| <b>seq303</b>  | Firmicutes    | Clostridia   | 0                   | 0                    | 0                   | 0                    |
| <b>seq422</b>  | Firmicutes    | Clostridia   | 0                   | 0                    | 0                   | 0                    |
| <b>seq565</b>  | Firmicutes    | Clostridia   | 0                   | 0                    | 0                   | 0                    |
| <b>seq880</b>  | Firmicutes    | Clostridia   | 0                   | 0                    | 0                   | 0                    |
| <b>seq166</b>  | Firmicutes    | Clostridia   | 0                   | 0                    | 88                  | 70                   |
| <b>seq418</b>  | Firmicutes    | Clostridia   | 0                   | 0                    | 5                   | 0                    |
| <b>seq1006</b> | Firmicutes    | Clostridia   | 0                   | 103                  | 0                   | 0                    |
| <b>seq1401</b> | Firmicutes    | Clostridia   | 0                   | 0                    | 0                   | 0                    |
| <b>seq1459</b> | Firmicutes    | Clostridia   | 0                   | 0                    | 0                   | 0                    |
| <b>seq1599</b> | Firmicutes    | Clostridia   | 0                   | 0                    | 0                   | 0                    |
| <b>seq1707</b> | Firmicutes    | Clostridia   | 0                   | 0                    | 0                   | 0                    |
| <b>seq1749</b> | Firmicutes    | Clostridia   | 0                   | 0                    | 0                   | 0                    |
| <b>seq477</b>  | Firmicutes    | Clostridia   | 0                   | 0                    | 0                   | 0                    |
| <b>seq620</b>  | Firmicutes    | Clostridia   | 0                   | 0                    | 0                   | 0                    |
| <b>seq1603</b> | Firmicutes    | Clostridia   | 0                   | 0                    | 0                   | 0                    |
| <b>seq1709</b> | Firmicutes    | Clostridia   | 0                   | 0                    | 0                   | 0                    |
| <b>seq471</b>  | Firmicutes    | Clostridia   | 14                  | 0                    | 0                   | 0                    |
| <b>seq1515</b> | Firmicutes    | Clostridia   | 0                   | 0                    | 0                   | 0                    |
| <b>seq1773</b> | Firmicutes    | Clostridia   | 0                   | 0                    | 0                   | 0                    |
| <b>seq1708</b> | Firmicutes    | Clostridia   | 0                   | 0                    | 0                   | 0                    |
| <b>seq56</b>   | Firmicutes    | Clostridia   | 0                   | 0                    | 0                   | 0                    |

Sequence Count Table

|                | <b>Phylum</b> | <b>Class</b> | <b>Δ</b> |  |  |  |
|----------------|---------------|--------------|----------|--|--|--|
| <b>seq1829</b> | Firmicutes    | Clostridia   |          |  |  |  |
| <b>seq311</b>  | Firmicutes    | Clostridia   |          |  |  |  |
| <b>seq410</b>  | Firmicutes    | Clostridia   |          |  |  |  |
| <b>seq783</b>  | Firmicutes    | Clostridia   |          |  |  |  |
| <b>seq792</b>  | Firmicutes    | Clostridia   |          |  |  |  |
| <b>seq913</b>  | Firmicutes    | Clostridia   |          |  |  |  |
| <b>seq984</b>  | Firmicutes    | Clostridia   |          |  |  |  |
| <b>seq1078</b> | Firmicutes    | Clostridia   |          |  |  |  |
| <b>seq1650</b> | Firmicutes    | Clostridia   |          |  |  |  |
| <b>seq1771</b> | Firmicutes    | Clostridia   |          |  |  |  |
| <b>seq113</b>  | Firmicutes    | Clostridia   |          |  |  |  |
| <b>seq303</b>  | Firmicutes    | Clostridia   |          |  |  |  |
| <b>seq422</b>  | Firmicutes    | Clostridia   |          |  |  |  |
| <b>seq565</b>  | Firmicutes    | Clostridia   |          |  |  |  |
| <b>seq880</b>  | Firmicutes    | Clostridia   |          |  |  |  |
| <b>seq166</b>  | Firmicutes    | Clostridia   |          |  |  |  |
| <b>seq418</b>  | Firmicutes    | Clostridia   |          |  |  |  |
| <b>seq1006</b> | Firmicutes    | Clostridia   |          |  |  |  |
| <b>seq1401</b> | Firmicutes    | Clostridia   |          |  |  |  |
| <b>seq1459</b> | Firmicutes    | Clostridia   |          |  |  |  |
| <b>seq1599</b> | Firmicutes    | Clostridia   |          |  |  |  |
| <b>seq1707</b> | Firmicutes    | Clostridia   |          |  |  |  |
| <b>seq1749</b> | Firmicutes    | Clostridia   |          |  |  |  |
| <b>seq477</b>  | Firmicutes    | Clostridia   |          |  |  |  |
| <b>seq620</b>  | Firmicutes    | Clostridia   |          |  |  |  |
| <b>seq1603</b> | Firmicutes    | Clostridia   |          |  |  |  |
| <b>seq1709</b> | Firmicutes    | Clostridia   |          |  |  |  |
| <b>seq471</b>  | Firmicutes    | Clostridia   |          |  |  |  |
| <b>seq1515</b> | Firmicutes    | Clostridia   |          |  |  |  |
| <b>seq1773</b> | Firmicutes    | Clostridia   |          |  |  |  |
| <b>seq1708</b> | Firmicutes    | Clostridia   |          |  |  |  |
| <b>seq56</b>   | Firmicutes    | Clostridia   |          |  |  |  |

Sequence Count Table

|                | <b>Phylum</b> | <b>Class</b> | <b>Order</b>  | <b>Family</b>   |
|----------------|---------------|--------------|---------------|-----------------|
| <b>seq109</b>  | Firmicutes    | Clostridia   | Clostridiales | Ruminococcaceae |
| <b>seq253</b>  | Firmicutes    | Clostridia   | Clostridiales | Ruminococcaceae |
| <b>seq340</b>  | Firmicutes    | Clostridia   | Clostridiales | Ruminococcaceae |
| <b>seq447</b>  | Firmicutes    | Clostridia   | Clostridiales | Ruminococcaceae |
| <b>seq560</b>  | Firmicutes    | Clostridia   | Clostridiales | Ruminococcaceae |
| <b>seq671</b>  | Firmicutes    | Clostridia   | Clostridiales | Ruminococcaceae |
| <b>seq677</b>  | Firmicutes    | Clostridia   | Clostridiales | Ruminococcaceae |
| <b>seq821</b>  | Firmicutes    | Clostridia   | Clostridiales | Ruminococcaceae |
| <b>seq851</b>  | Firmicutes    | Clostridia   | Clostridiales | Ruminococcaceae |
| <b>seq1000</b> | Firmicutes    | Clostridia   | Clostridiales | Ruminococcaceae |
| <b>seq1183</b> | Firmicutes    | Clostridia   | Clostridiales | Ruminococcaceae |
| <b>seq1263</b> | Firmicutes    | Clostridia   | Clostridiales | Ruminococcaceae |
| <b>seq1318</b> | Firmicutes    | Clostridia   | Clostridiales | Ruminococcaceae |
| <b>seq1323</b> | Firmicutes    | Clostridia   | Clostridiales | Ruminococcaceae |
| <b>seq1388</b> | Firmicutes    | Clostridia   | Clostridiales | Ruminococcaceae |
| <b>seq1668</b> | Firmicutes    | Clostridia   | Clostridiales | Ruminococcaceae |
| <b>seq70</b>   | Firmicutes    | Clostridia   | Clostridiales | Ruminococcaceae |
| <b>seq207</b>  | Firmicutes    | Clostridia   | Clostridiales | Ruminococcaceae |
| <b>seq216</b>  | Firmicutes    | Clostridia   | Clostridiales | Ruminococcaceae |
| <b>seq170</b>  | Firmicutes    | Clostridia   | Clostridiales | Ruminococcaceae |
| <b>seq266</b>  | Firmicutes    | Clostridia   | Clostridiales | Ruminococcaceae |
| <b>seq470</b>  | Firmicutes    | Clostridia   | Clostridiales | Ruminococcaceae |
| <b>seq529</b>  | Firmicutes    | Clostridia   | Clostridiales | Ruminococcaceae |
| <b>seq646</b>  | Firmicutes    | Clostridia   | Clostridiales | Ruminococcaceae |
| <b>seq686</b>  | Firmicutes    | Clostridia   | Clostridiales | Ruminococcaceae |
| <b>seq873</b>  | Firmicutes    | Clostridia   | Clostridiales | Ruminococcaceae |
| <b>seq976</b>  | Firmicutes    | Clostridia   | Clostridiales | Ruminococcaceae |
| <b>seq985</b>  | Firmicutes    | Clostridia   | Clostridiales | Ruminococcaceae |
| <b>seq1089</b> | Firmicutes    | Clostridia   | Clostridiales | Ruminococcaceae |
| <b>seq1238</b> | Firmicutes    | Clostridia   | Clostridiales | Ruminococcaceae |
| <b>seq1320</b> | Firmicutes    | Clostridia   | Clostridiales | Ruminococcaceae |
| <b>seq1378</b> | Firmicutes    | Clostridia   | Clostridiales | Ruminococcaceae |

Sequence Count Table

|                | <b>Phylum</b> | <b>Class</b> | <b>Genus</b>        | <b>Species</b> |
|----------------|---------------|--------------|---------------------|----------------|
| <b>seq109</b>  | Firmicutes    | Clostridia   | Ruminiclostridium_5 |                |
| <b>seq253</b>  | Firmicutes    | Clostridia   | Ruminiclostridium_5 |                |
| <b>seq340</b>  | Firmicutes    | Clostridia   | Ruminiclostridium_5 |                |
| <b>seq447</b>  | Firmicutes    | Clostridia   | Ruminiclostridium_5 |                |
| <b>seq560</b>  | Firmicutes    | Clostridia   | Ruminiclostridium_5 |                |
| <b>seq671</b>  | Firmicutes    | Clostridia   | Ruminiclostridium_5 |                |
| <b>seq677</b>  | Firmicutes    | Clostridia   | Ruminiclostridium_5 |                |
| <b>seq821</b>  | Firmicutes    | Clostridia   | Ruminiclostridium_5 |                |
| <b>seq851</b>  | Firmicutes    | Clostridia   | Ruminiclostridium_5 |                |
| <b>seq1000</b> | Firmicutes    | Clostridia   | Ruminiclostridium_5 |                |
| <b>seq1183</b> | Firmicutes    | Clostridia   | Ruminiclostridium_5 |                |
| <b>seq1263</b> | Firmicutes    | Clostridia   | Ruminiclostridium_5 |                |
| <b>seq1318</b> | Firmicutes    | Clostridia   | Ruminiclostridium_5 |                |
| <b>seq1323</b> | Firmicutes    | Clostridia   | Ruminiclostridium_5 |                |
| <b>seq1388</b> | Firmicutes    | Clostridia   | Ruminiclostridium_5 |                |
| <b>seq1668</b> | Firmicutes    | Clostridia   | Ruminiclostridium_5 |                |
| <b>seq70</b>   | Firmicutes    | Clostridia   | Ruminiclostridium_6 |                |
| <b>seq207</b>  | Firmicutes    | Clostridia   | Ruminiclostridium_6 |                |
| <b>seq216</b>  | Firmicutes    | Clostridia   | Ruminiclostridium_6 |                |
| <b>seq170</b>  | Firmicutes    | Clostridia   | Ruminiclostridium_9 |                |
| <b>seq266</b>  | Firmicutes    | Clostridia   | Ruminiclostridium_9 |                |
| <b>seq470</b>  | Firmicutes    | Clostridia   | Ruminiclostridium_9 |                |
| <b>seq529</b>  | Firmicutes    | Clostridia   | Ruminiclostridium_9 |                |
| <b>seq646</b>  | Firmicutes    | Clostridia   | Ruminiclostridium_9 |                |
| <b>seq686</b>  | Firmicutes    | Clostridia   | Ruminiclostridium_9 |                |
| <b>seq873</b>  | Firmicutes    | Clostridia   | Ruminiclostridium_9 |                |
| <b>seq976</b>  | Firmicutes    | Clostridia   | Ruminiclostridium_9 |                |
| <b>seq985</b>  | Firmicutes    | Clostridia   | Ruminiclostridium_9 |                |
| <b>seq1089</b> | Firmicutes    | Clostridia   | Ruminiclostridium_9 |                |
| <b>seq1238</b> | Firmicutes    | Clostridia   | Ruminiclostridium_9 |                |
| <b>seq1320</b> | Firmicutes    | Clostridia   | Ruminiclostridium_9 |                |
| <b>seq1378</b> | Firmicutes    | Clostridia   | Ruminiclostridium_9 |                |



Sequence Count Table

|                | <b>Phylum</b> | <b>Class</b> | <b>Subject34WK0</b> | <b>Subject34WK12</b> | <b>Subject16WK0</b> | <b>Subject16WK12</b> |
|----------------|---------------|--------------|---------------------|----------------------|---------------------|----------------------|
| <b>seq109</b>  | Firmicutes    | Clostridia   | 0                   | 20                   | 24                  | 29                   |
| <b>seq253</b>  | Firmicutes    | Clostridia   | 0                   | 12                   | 0                   | 0                    |
| <b>seq340</b>  | Firmicutes    | Clostridia   | 0                   | 6                    | 0                   | 0                    |
| <b>seq447</b>  | Firmicutes    | Clostridia   | 0                   | 0                    | 0                   | 0                    |
| <b>seq560</b>  | Firmicutes    | Clostridia   | 0                   | 0                    | 0                   | 0                    |
| <b>seq671</b>  | Firmicutes    | Clostridia   | 0                   | 0                    | 0                   | 0                    |
| <b>seq677</b>  | Firmicutes    | Clostridia   | 0                   | 14                   | 8                   | 18                   |
| <b>seq821</b>  | Firmicutes    | Clostridia   | 0                   | 0                    | 0                   | 0                    |
| <b>seq851</b>  | Firmicutes    | Clostridia   | 0                   | 0                    | 0                   | 0                    |
| <b>seq1000</b> | Firmicutes    | Clostridia   | 0                   | 0                    | 0                   | 0                    |
| <b>seq1183</b> | Firmicutes    | Clostridia   | 0                   | 0                    | 0                   | 0                    |
| <b>seq1263</b> | Firmicutes    | Clostridia   | 0                   | 0                    | 0                   | 0                    |
| <b>seq1318</b> | Firmicutes    | Clostridia   | 0                   | 0                    | 18                  | 35                   |
| <b>seq1323</b> | Firmicutes    | Clostridia   | 0                   | 0                    | 0                   | 0                    |
| <b>seq1388</b> | Firmicutes    | Clostridia   | 0                   | 0                    | 0                   | 0                    |
| <b>seq1668</b> | Firmicutes    | Clostridia   | 0                   | 0                    | 0                   | 0                    |
| <b>seq70</b>   | Firmicutes    | Clostridia   | 0                   | 0                    | 0                   | 22                   |
| <b>seq207</b>  | Firmicutes    | Clostridia   | 0                   | 0                    | 0                   | 0                    |
| <b>seq216</b>  | Firmicutes    | Clostridia   | 0                   | 0                    | 0                   | 0                    |
| <b>seq170</b>  | Firmicutes    | Clostridia   | 8                   | 46                   | 0                   | 0                    |
| <b>seq266</b>  | Firmicutes    | Clostridia   | 50                  | 109                  | 189                 | 192                  |
| <b>seq470</b>  | Firmicutes    | Clostridia   | 0                   | 0                    | 0                   | 0                    |
| <b>seq529</b>  | Firmicutes    | Clostridia   | 0                   | 10                   | 0                   | 0                    |
| <b>seq646</b>  | Firmicutes    | Clostridia   | 0                   | 0                    | 0                   | 0                    |
| <b>seq686</b>  | Firmicutes    | Clostridia   | 0                   | 0                    | 0                   | 0                    |
| <b>seq873</b>  | Firmicutes    | Clostridia   | 0                   | 0                    | 0                   | 0                    |
| <b>seq976</b>  | Firmicutes    | Clostridia   | 0                   | 0                    | 16                  | 5                    |
| <b>seq985</b>  | Firmicutes    | Clostridia   | 0                   | 0                    | 0                   | 0                    |
| <b>seq1089</b> | Firmicutes    | Clostridia   | 0                   | 0                    | 0                   | 0                    |
| <b>seq1238</b> | Firmicutes    | Clostridia   | 0                   | 0                    | 0                   | 0                    |
| <b>seq1320</b> | Firmicutes    | Clostridia   | 0                   | 0                    | 0                   | 0                    |
| <b>seq1378</b> | Firmicutes    | Clostridia   | 0                   | 0                    | 0                   | 0                    |

Sequence Count Table

|                | <b>Phylum</b> | <b>Class</b> | <b>Subject17WK0</b> | <b>Subject17WK12</b> | <b>Subject1WK0</b> | <b>Subject1WK12</b> |
|----------------|---------------|--------------|---------------------|----------------------|--------------------|---------------------|
| <b>seq109</b>  | Firmicutes    | Clostridia   | 427                 | 190                  | 246                | 242                 |
| <b>seq253</b>  | Firmicutes    | Clostridia   | 0                   | 0                    | 89                 | 101                 |
| <b>seq340</b>  | Firmicutes    | Clostridia   | 260                 | 204                  | 48                 | 44                  |
| <b>seq447</b>  | Firmicutes    | Clostridia   | 0                   | 0                    | 0                  | 0                   |
| <b>seq560</b>  | Firmicutes    | Clostridia   | 0                   | 0                    | 0                  | 0                   |
| <b>seq671</b>  | Firmicutes    | Clostridia   | 0                   | 0                    | 0                  | 0                   |
| <b>seq677</b>  | Firmicutes    | Clostridia   | 24                  | 0                    | 18                 | 20                  |
| <b>seq821</b>  | Firmicutes    | Clostridia   | 0                   | 22                   | 0                  | 0                   |
| <b>seq851</b>  | Firmicutes    | Clostridia   | 0                   | 0                    | 0                  | 0                   |
| <b>seq1000</b> | Firmicutes    | Clostridia   | 0                   | 0                    | 0                  | 0                   |
| <b>seq1183</b> | Firmicutes    | Clostridia   | 85                  | 0                    | 0                  | 0                   |
| <b>seq1263</b> | Firmicutes    | Clostridia   | 0                   | 0                    | 0                  | 0                   |
| <b>seq1318</b> | Firmicutes    | Clostridia   | 0                   | 0                    | 0                  | 0                   |
| <b>seq1323</b> | Firmicutes    | Clostridia   | 0                   | 0                    | 0                  | 0                   |
| <b>seq1388</b> | Firmicutes    | Clostridia   | 0                   | 0                    | 0                  | 0                   |
| <b>seq1668</b> | Firmicutes    | Clostridia   | 0                   | 0                    | 0                  | 0                   |
| <b>seq70</b>   | Firmicutes    | Clostridia   | 1065                | 6084                 | 145                | 159                 |
| <b>seq207</b>  | Firmicutes    | Clostridia   | 0                   | 0                    | 0                  | 0                   |
| <b>seq216</b>  | Firmicutes    | Clostridia   | 0                   | 0                    | 0                  | 0                   |
| <b>seq170</b>  | Firmicutes    | Clostridia   | 14                  | 10                   | 0                  | 0                   |
| <b>seq266</b>  | Firmicutes    | Clostridia   | 15                  | 65                   | 12                 | 13                  |
| <b>seq470</b>  | Firmicutes    | Clostridia   | 0                   | 0                    | 0                  | 0                   |
| <b>seq529</b>  | Firmicutes    | Clostridia   | 10                  | 15                   | 53                 | 61                  |
| <b>seq646</b>  | Firmicutes    | Clostridia   | 0                   | 0                    | 0                  | 0                   |
| <b>seq686</b>  | Firmicutes    | Clostridia   | 0                   | 0                    | 16                 | 15                  |
| <b>seq873</b>  | Firmicutes    | Clostridia   | 0                   | 0                    | 0                  | 0                   |
| <b>seq976</b>  | Firmicutes    | Clostridia   | 16                  | 8                    | 0                  | 0                   |
| <b>seq985</b>  | Firmicutes    | Clostridia   | 0                   | 0                    | 0                  | 0                   |
| <b>seq1089</b> | Firmicutes    | Clostridia   | 0                   | 0                    | 0                  | 0                   |
| <b>seq1238</b> | Firmicutes    | Clostridia   | 0                   | 0                    | 0                  | 0                   |
| <b>seq1320</b> | Firmicutes    | Clostridia   | 0                   | 0                    | 0                  | 0                   |
| <b>seq1378</b> | Firmicutes    | Clostridia   | 0                   | 0                    | 0                  | 0                   |

Sequence Count Table

|                | <b>Phylum</b> | <b>Class</b> | <b>Subject2WK0</b> | <b>Subject2WK12</b> | <b>Subject3WK0</b> | <b>Subject3WK12</b> |
|----------------|---------------|--------------|--------------------|---------------------|--------------------|---------------------|
| <b>seq109</b>  | Firmicutes    | Clostridia   | 630                | 172                 | 0                  | 16                  |
| <b>seq253</b>  | Firmicutes    | Clostridia   | 86                 | 60                  | 222                | 69                  |
| <b>seq340</b>  | Firmicutes    | Clostridia   | 0                  | 0                   | 0                  | 0                   |
| <b>seq447</b>  | Firmicutes    | Clostridia   | 0                  | 0                   | 26                 | 0                   |
| <b>seq560</b>  | Firmicutes    | Clostridia   | 0                  | 0                   | 0                  | 0                   |
| <b>seq671</b>  | Firmicutes    | Clostridia   | 0                  | 0                   | 0                  | 0                   |
| <b>seq677</b>  | Firmicutes    | Clostridia   | 0                  | 0                   | 0                  | 0                   |
| <b>seq821</b>  | Firmicutes    | Clostridia   | 0                  | 0                   | 0                  | 0                   |
| <b>seq851</b>  | Firmicutes    | Clostridia   | 0                  | 0                   | 0                  | 0                   |
| <b>seq1000</b> | Firmicutes    | Clostridia   | 0                  | 0                   | 0                  | 0                   |
| <b>seq1183</b> | Firmicutes    | Clostridia   | 0                  | 0                   | 0                  | 0                   |
| <b>seq1263</b> | Firmicutes    | Clostridia   | 0                  | 0                   | 0                  | 0                   |
| <b>seq1318</b> | Firmicutes    | Clostridia   | 0                  | 0                   | 0                  | 0                   |
| <b>seq1323</b> | Firmicutes    | Clostridia   | 0                  | 0                   | 0                  | 0                   |
| <b>seq1388</b> | Firmicutes    | Clostridia   | 0                  | 0                   | 0                  | 0                   |
| <b>seq1668</b> | Firmicutes    | Clostridia   | 0                  | 0                   | 0                  | 0                   |
| <b>seq70</b>   | Firmicutes    | Clostridia   | 19                 | 17                  | 0                  | 0                   |
| <b>seq207</b>  | Firmicutes    | Clostridia   | 0                  | 0                   | 0                  | 0                   |
| <b>seq216</b>  | Firmicutes    | Clostridia   | 0                  | 0                   | 0                  | 0                   |
| <b>seq170</b>  | Firmicutes    | Clostridia   | 0                  | 0                   | 0                  | 207                 |
| <b>seq266</b>  | Firmicutes    | Clostridia   | 0                  | 0                   | 0                  | 0                   |
| <b>seq470</b>  | Firmicutes    | Clostridia   | 0                  | 0                   | 0                  | 0                   |
| <b>seq529</b>  | Firmicutes    | Clostridia   | 22                 | 39                  | 0                  | 0                   |
| <b>seq646</b>  | Firmicutes    | Clostridia   | 0                  | 0                   | 0                  | 0                   |
| <b>seq686</b>  | Firmicutes    | Clostridia   | 0                  | 0                   | 0                  | 0                   |
| <b>seq873</b>  | Firmicutes    | Clostridia   | 0                  | 0                   | 0                  | 0                   |
| <b>seq976</b>  | Firmicutes    | Clostridia   | 0                  | 0                   | 0                  | 0                   |
| <b>seq985</b>  | Firmicutes    | Clostridia   | 0                  | 0                   | 0                  | 0                   |
| <b>seq1089</b> | Firmicutes    | Clostridia   | 0                  | 0                   | 0                  | 0                   |
| <b>seq1238</b> | Firmicutes    | Clostridia   | 0                  | 0                   | 0                  | 0                   |
| <b>seq1320</b> | Firmicutes    | Clostridia   | 0                  | 0                   | 0                  | 0                   |
| <b>seq1378</b> | Firmicutes    | Clostridia   | 0                  | 0                   | 0                  | 0                   |

Sequence Count Table

|                | <b>Phylum</b> | <b>Class</b> | <b>Subject4WK0</b> | <b>Subject4WK12</b> | <b>Subject5WK0</b> | <b>Subject5WK12</b> |
|----------------|---------------|--------------|--------------------|---------------------|--------------------|---------------------|
| <b>seq109</b>  | Firmicutes    | Clostridia   | 202                | 200                 | 1121               | 41                  |
| <b>seq253</b>  | Firmicutes    | Clostridia   | 199                | 98                  | 57                 | 175                 |
| <b>seq340</b>  | Firmicutes    | Clostridia   | 121                | 140                 | 0                  | 0                   |
| <b>seq447</b>  | Firmicutes    | Clostridia   | 36                 | 39                  | 0                  | 0                   |
| <b>seq560</b>  | Firmicutes    | Clostridia   | 0                  | 0                   | 0                  | 0                   |
| <b>seq671</b>  | Firmicutes    | Clostridia   | 0                  | 0                   | 0                  | 0                   |
| <b>seq677</b>  | Firmicutes    | Clostridia   | 14                 | 34                  | 0                  | 0                   |
| <b>seq821</b>  | Firmicutes    | Clostridia   | 0                  | 0                   | 0                  | 0                   |
| <b>seq851</b>  | Firmicutes    | Clostridia   | 0                  | 0                   | 0                  | 0                   |
| <b>seq1000</b> | Firmicutes    | Clostridia   | 0                  | 0                   | 8                  | 49                  |
| <b>seq1183</b> | Firmicutes    | Clostridia   | 0                  | 0                   | 0                  | 0                   |
| <b>seq1263</b> | Firmicutes    | Clostridia   | 0                  | 0                   | 0                  | 0                   |
| <b>seq1318</b> | Firmicutes    | Clostridia   | 0                  | 0                   | 0                  | 0                   |
| <b>seq1323</b> | Firmicutes    | Clostridia   | 0                  | 0                   | 24                 | 23                  |
| <b>seq1388</b> | Firmicutes    | Clostridia   | 0                  | 0                   | 0                  | 0                   |
| <b>seq1668</b> | Firmicutes    | Clostridia   | 0                  | 0                   | 0                  | 0                   |
| <b>seq70</b>   | Firmicutes    | Clostridia   | 1791               | 6                   | 0                  | 0                   |
| <b>seq207</b>  | Firmicutes    | Clostridia   | 0                  | 0                   | 0                  | 0                   |
| <b>seq216</b>  | Firmicutes    | Clostridia   | 0                  | 0                   | 0                  | 0                   |
| <b>seq170</b>  | Firmicutes    | Clostridia   | 0                  | 0                   | 52                 | 82                  |
| <b>seq266</b>  | Firmicutes    | Clostridia   | 15                 | 34                  | 0                  | 0                   |
| <b>seq470</b>  | Firmicutes    | Clostridia   | 31                 | 34                  | 0                  | 0                   |
| <b>seq529</b>  | Firmicutes    | Clostridia   | 0                  | 50                  | 30                 | 16                  |
| <b>seq646</b>  | Firmicutes    | Clostridia   | 0                  | 0                   | 0                  | 0                   |
| <b>seq686</b>  | Firmicutes    | Clostridia   | 31                 | 0                   | 0                  | 0                   |
| <b>seq873</b>  | Firmicutes    | Clostridia   | 0                  | 0                   | 0                  | 0                   |
| <b>seq976</b>  | Firmicutes    | Clostridia   | 0                  | 0                   | 0                  | 0                   |
| <b>seq985</b>  | Firmicutes    | Clostridia   | 0                  | 0                   | 0                  | 0                   |
| <b>seq1089</b> | Firmicutes    | Clostridia   | 0                  | 0                   | 0                  | 0                   |
| <b>seq1238</b> | Firmicutes    | Clostridia   | 0                  | 0                   | 0                  | 0                   |
| <b>seq1320</b> | Firmicutes    | Clostridia   | 0                  | 0                   | 0                  | 0                   |
| <b>seq1378</b> | Firmicutes    | Clostridia   | 0                  | 0                   | 0                  | 0                   |

Sequence Count Table

|                | <b>Phylum</b> | <b>Class</b> | <b>Subject6WK0</b> | <b>Subject6WK12</b> | <b>Subject18WK0</b> | <b>Subject18WK12</b> |
|----------------|---------------|--------------|--------------------|---------------------|---------------------|----------------------|
| <b>seq109</b>  | Firmicutes    | Clostridia   | 47                 | 50                  | 3882                | 453                  |
| <b>seq253</b>  | Firmicutes    | Clostridia   | 0                  | 0                   | 203                 | 54                   |
| <b>seq340</b>  | Firmicutes    | Clostridia   | 37                 | 21                  | 0                   | 0                    |
| <b>seq447</b>  | Firmicutes    | Clostridia   | 0                  | 0                   | 374                 | 62                   |
| <b>seq560</b>  | Firmicutes    | Clostridia   | 0                  | 0                   | 0                   | 0                    |
| <b>seq671</b>  | Firmicutes    | Clostridia   | 0                  | 0                   | 0                   | 0                    |
| <b>seq677</b>  | Firmicutes    | Clostridia   | 0                  | 16                  | 24                  | 0                    |
| <b>seq821</b>  | Firmicutes    | Clostridia   | 19                 | 30                  | 0                   | 0                    |
| <b>seq851</b>  | Firmicutes    | Clostridia   | 0                  | 0                   | 0                   | 0                    |
| <b>seq1000</b> | Firmicutes    | Clostridia   | 0                  | 0                   | 0                   | 0                    |
| <b>seq1183</b> | Firmicutes    | Clostridia   | 0                  | 0                   | 0                   | 0                    |
| <b>seq1263</b> | Firmicutes    | Clostridia   | 0                  | 0                   | 0                   | 0                    |
| <b>seq1318</b> | Firmicutes    | Clostridia   | 0                  | 0                   | 0                   | 0                    |
| <b>seq1323</b> | Firmicutes    | Clostridia   | 0                  | 0                   | 0                   | 0                    |
| <b>seq1388</b> | Firmicutes    | Clostridia   | 0                  | 0                   | 0                   | 0                    |
| <b>seq1668</b> | Firmicutes    | Clostridia   | 0                  | 0                   | 0                   | 0                    |
| <b>seq70</b>   | Firmicutes    | Clostridia   | 256                | 13                  | 0                   | 0                    |
| <b>seq207</b>  | Firmicutes    | Clostridia   | 557                | 1187                | 0                   | 0                    |
| <b>seq216</b>  | Firmicutes    | Clostridia   | 0                  | 0                   | 0                   | 0                    |
| <b>seq170</b>  | Firmicutes    | Clostridia   | 0                  | 10                  | 121                 | 47                   |
| <b>seq266</b>  | Firmicutes    | Clostridia   | 96                 | 55                  | 0                   | 0                    |
| <b>seq470</b>  | Firmicutes    | Clostridia   | 0                  | 0                   | 238                 | 108                  |
| <b>seq529</b>  | Firmicutes    | Clostridia   | 0                  | 0                   | 0                   | 0                    |
| <b>seq646</b>  | Firmicutes    | Clostridia   | 0                  | 0                   | 0                   | 0                    |
| <b>seq686</b>  | Firmicutes    | Clostridia   | 26                 | 9                   | 0                   | 0                    |
| <b>seq873</b>  | Firmicutes    | Clostridia   | 0                  | 0                   | 0                   | 0                    |
| <b>seq976</b>  | Firmicutes    | Clostridia   | 0                  | 0                   | 0                   | 0                    |
| <b>seq985</b>  | Firmicutes    | Clostridia   | 0                  | 0                   | 0                   | 0                    |
| <b>seq1089</b> | Firmicutes    | Clostridia   | 0                  | 0                   | 0                   | 0                    |
| <b>seq1238</b> | Firmicutes    | Clostridia   | 0                  | 0                   | 0                   | 0                    |
| <b>seq1320</b> | Firmicutes    | Clostridia   | 0                  | 0                   | 0                   | 0                    |
| <b>seq1378</b> | Firmicutes    | Clostridia   | 0                  | 0                   | 0                   | 0                    |

Sequence Count Table

|                | <b>Phylum</b> | <b>Class</b> | <b>Subject19WK0</b> | <b>Subject19WK12</b> | <b>Subject20WK0</b> | <b>Subject20WK12</b> |
|----------------|---------------|--------------|---------------------|----------------------|---------------------|----------------------|
| <b>seq109</b>  | Firmicutes    | Clostridia   | 0                   | 0                    | 65                  | 30                   |
| <b>seq253</b>  | Firmicutes    | Clostridia   | 124                 | 112                  | 0                   | 0                    |
| <b>seq340</b>  | Firmicutes    | Clostridia   | 0                   | 0                    | 0                   | 0                    |
| <b>seq447</b>  | Firmicutes    | Clostridia   | 0                   | 0                    | 0                   | 0                    |
| <b>seq560</b>  | Firmicutes    | Clostridia   | 0                   | 0                    | 0                   | 0                    |
| <b>seq671</b>  | Firmicutes    | Clostridia   | 113                 | 255                  | 0                   | 0                    |
| <b>seq677</b>  | Firmicutes    | Clostridia   | 0                   | 20                   | 0                   | 0                    |
| <b>seq821</b>  | Firmicutes    | Clostridia   | 0                   | 0                    | 0                   | 0                    |
| <b>seq851</b>  | Firmicutes    | Clostridia   | 25                  | 122                  | 0                   | 0                    |
| <b>seq1000</b> | Firmicutes    | Clostridia   | 0                   | 0                    | 0                   | 0                    |
| <b>seq1183</b> | Firmicutes    | Clostridia   | 0                   | 0                    | 0                   | 0                    |
| <b>seq1263</b> | Firmicutes    | Clostridia   | 0                   | 0                    | 0                   | 0                    |
| <b>seq1318</b> | Firmicutes    | Clostridia   | 0                   | 0                    | 0                   | 0                    |
| <b>seq1323</b> | Firmicutes    | Clostridia   | 0                   | 0                    | 0                   | 0                    |
| <b>seq1388</b> | Firmicutes    | Clostridia   | 0                   | 0                    | 0                   | 0                    |
| <b>seq1668</b> | Firmicutes    | Clostridia   | 0                   | 0                    | 0                   | 0                    |
| <b>seq70</b>   | Firmicutes    | Clostridia   | 0                   | 0                    | 1457                | 346                  |
| <b>seq207</b>  | Firmicutes    | Clostridia   | 0                   | 0                    | 375                 | 50                   |
| <b>seq216</b>  | Firmicutes    | Clostridia   | 0                   | 0                    | 672                 | 167                  |
| <b>seq170</b>  | Firmicutes    | Clostridia   | 580                 | 890                  | 0                   | 0                    |
| <b>seq266</b>  | Firmicutes    | Clostridia   | 0                   | 0                    | 36                  | 92                   |
| <b>seq470</b>  | Firmicutes    | Clostridia   | 0                   | 0                    | 0                   | 0                    |
| <b>seq529</b>  | Firmicutes    | Clostridia   | 0                   | 0                    | 9                   | 0                    |
| <b>seq646</b>  | Firmicutes    | Clostridia   | 0                   | 0                    | 0                   | 0                    |
| <b>seq686</b>  | Firmicutes    | Clostridia   | 0                   | 0                    | 0                   | 0                    |
| <b>seq873</b>  | Firmicutes    | Clostridia   | 0                   | 0                    | 0                   | 0                    |
| <b>seq976</b>  | Firmicutes    | Clostridia   | 0                   | 0                    | 0                   | 0                    |
| <b>seq985</b>  | Firmicutes    | Clostridia   | 0                   | 0                    | 0                   | 0                    |
| <b>seq1089</b> | Firmicutes    | Clostridia   | 0                   | 0                    | 0                   | 0                    |
| <b>seq1238</b> | Firmicutes    | Clostridia   | 0                   | 0                    | 0                   | 0                    |
| <b>seq1320</b> | Firmicutes    | Clostridia   | 0                   | 0                    | 0                   | 0                    |
| <b>seq1378</b> | Firmicutes    | Clostridia   | 0                   | 0                    | 0                   | 0                    |

Sequence Count Table

|                | <b>Phylum</b> | <b>Class</b> | <b>Subject7WK0</b> | <b>Subject7WK12</b> | <b>Subject21WK0</b> | <b>Subject21WK12</b> |
|----------------|---------------|--------------|--------------------|---------------------|---------------------|----------------------|
| <b>seq109</b>  | Firmicutes    | Clostridia   | 308                | 151                 | 16                  | 12                   |
| <b>seq253</b>  | Firmicutes    | Clostridia   | 80                 | 78                  | 39                  | 72                   |
| <b>seq340</b>  | Firmicutes    | Clostridia   | 0                  | 33                  | 0                   | 0                    |
| <b>seq447</b>  | Firmicutes    | Clostridia   | 66                 | 68                  | 0                   | 0                    |
| <b>seq560</b>  | Firmicutes    | Clostridia   | 0                  | 0                   | 0                   | 0                    |
| <b>seq671</b>  | Firmicutes    | Clostridia   | 0                  | 0                   | 0                   | 0                    |
| <b>seq677</b>  | Firmicutes    | Clostridia   | 34                 | 21                  | 0                   | 0                    |
| <b>seq821</b>  | Firmicutes    | Clostridia   | 40                 | 0                   | 0                   | 0                    |
| <b>seq851</b>  | Firmicutes    | Clostridia   | 0                  | 0                   | 0                   | 0                    |
| <b>seq1000</b> | Firmicutes    | Clostridia   | 0                  | 0                   | 0                   | 0                    |
| <b>seq1183</b> | Firmicutes    | Clostridia   | 0                  | 0                   | 0                   | 0                    |
| <b>seq1263</b> | Firmicutes    | Clostridia   | 0                  | 0                   | 0                   | 0                    |
| <b>seq1318</b> | Firmicutes    | Clostridia   | 0                  | 0                   | 0                   | 0                    |
| <b>seq1323</b> | Firmicutes    | Clostridia   | 0                  | 5                   | 0                   | 0                    |
| <b>seq1388</b> | Firmicutes    | Clostridia   | 0                  | 0                   | 0                   | 0                    |
| <b>seq1668</b> | Firmicutes    | Clostridia   | 0                  | 0                   | 0                   | 0                    |
| <b>seq70</b>   | Firmicutes    | Clostridia   | 8                  | 0                   | 0                   | 0                    |
| <b>seq207</b>  | Firmicutes    | Clostridia   | 0                  | 0                   | 0                   | 0                    |
| <b>seq216</b>  | Firmicutes    | Clostridia   | 0                  | 0                   | 0                   | 0                    |
| <b>seq170</b>  | Firmicutes    | Clostridia   | 406                | 285                 | 295                 | 749                  |
| <b>seq266</b>  | Firmicutes    | Clostridia   | 189                | 208                 | 0                   | 0                    |
| <b>seq470</b>  | Firmicutes    | Clostridia   | 46                 | 0                   | 0                   | 0                    |
| <b>seq529</b>  | Firmicutes    | Clostridia   | 36                 | 25                  | 12                  | 41                   |
| <b>seq646</b>  | Firmicutes    | Clostridia   | 0                  | 0                   | 0                   | 0                    |
| <b>seq686</b>  | Firmicutes    | Clostridia   | 0                  | 0                   | 0                   | 0                    |
| <b>seq873</b>  | Firmicutes    | Clostridia   | 0                  | 0                   | 0                   | 0                    |
| <b>seq976</b>  | Firmicutes    | Clostridia   | 0                  | 0                   | 0                   | 0                    |
| <b>seq985</b>  | Firmicutes    | Clostridia   | 0                  | 0                   | 0                   | 0                    |
| <b>seq1089</b> | Firmicutes    | Clostridia   | 0                  | 0                   | 0                   | 0                    |
| <b>seq1238</b> | Firmicutes    | Clostridia   | 0                  | 0                   | 0                   | 0                    |
| <b>seq1320</b> | Firmicutes    | Clostridia   | 0                  | 0                   | 0                   | 0                    |
| <b>seq1378</b> | Firmicutes    | Clostridia   | 0                  | 0                   | 0                   | 0                    |

Sequence Count Table

|                | <b>Phylum</b> | <b>Class</b> | <b>Subject8WK0</b> | <b>Subject8WK12</b> | <b>Subject9WK0</b> | <b>Subject9WK12</b> |
|----------------|---------------|--------------|--------------------|---------------------|--------------------|---------------------|
| <b>seq109</b>  | Firmicutes    | Clostridia   | 92                 | 581                 | 44                 | 0                   |
| <b>seq253</b>  | Firmicutes    | Clostridia   | 62                 | 67                  | 49                 | 39                  |
| <b>seq340</b>  | Firmicutes    | Clostridia   | 0                  | 0                   | 0                  | 0                   |
| <b>seq447</b>  | Firmicutes    | Clostridia   | 0                  | 0                   | 0                  | 0                   |
| <b>seq560</b>  | Firmicutes    | Clostridia   | 0                  | 0                   | 0                  | 0                   |
| <b>seq671</b>  | Firmicutes    | Clostridia   | 0                  | 0                   | 0                  | 0                   |
| <b>seq677</b>  | Firmicutes    | Clostridia   | 22                 | 23                  | 0                  | 0                   |
| <b>seq821</b>  | Firmicutes    | Clostridia   | 8                  | 12                  | 0                  | 0                   |
| <b>seq851</b>  | Firmicutes    | Clostridia   | 0                  | 0                   | 0                  | 0                   |
| <b>seq1000</b> | Firmicutes    | Clostridia   | 0                  | 0                   | 59                 | 0                   |
| <b>seq1183</b> | Firmicutes    | Clostridia   | 0                  | 0                   | 0                  | 0                   |
| <b>seq1263</b> | Firmicutes    | Clostridia   | 0                  | 0                   | 0                  | 0                   |
| <b>seq1318</b> | Firmicutes    | Clostridia   | 0                  | 0                   | 0                  | 0                   |
| <b>seq1323</b> | Firmicutes    | Clostridia   | 0                  | 0                   | 0                  | 0                   |
| <b>seq1388</b> | Firmicutes    | Clostridia   | 0                  | 13                  | 0                  | 0                   |
| <b>seq1668</b> | Firmicutes    | Clostridia   | 0                  | 0                   | 0                  | 0                   |
| <b>seq70</b>   | Firmicutes    | Clostridia   | 0                  | 0                   | 731                | 0                   |
| <b>seq207</b>  | Firmicutes    | Clostridia   | 9                  | 70                  | 0                  | 0                   |
| <b>seq216</b>  | Firmicutes    | Clostridia   | 0                  | 0                   | 0                  | 0                   |
| <b>seq170</b>  | Firmicutes    | Clostridia   | 0                  | 27                  | 423                | 151                 |
| <b>seq266</b>  | Firmicutes    | Clostridia   | 150                | 157                 | 0                  | 0                   |
| <b>seq470</b>  | Firmicutes    | Clostridia   | 0                  | 141                 | 0                  | 0                   |
| <b>seq529</b>  | Firmicutes    | Clostridia   | 31                 | 0                   | 0                  | 0                   |
| <b>seq646</b>  | Firmicutes    | Clostridia   | 0                  | 0                   | 0                  | 0                   |
| <b>seq686</b>  | Firmicutes    | Clostridia   | 0                  | 0                   | 0                  | 0                   |
| <b>seq873</b>  | Firmicutes    | Clostridia   | 0                  | 0                   | 0                  | 0                   |
| <b>seq976</b>  | Firmicutes    | Clostridia   | 0                  | 0                   | 0                  | 0                   |
| <b>seq985</b>  | Firmicutes    | Clostridia   | 0                  | 0                   | 0                  | 0                   |
| <b>seq1089</b> | Firmicutes    | Clostridia   | 0                  | 0                   | 0                  | 0                   |
| <b>seq1238</b> | Firmicutes    | Clostridia   | 0                  | 0                   | 0                  | 0                   |
| <b>seq1320</b> | Firmicutes    | Clostridia   | 0                  | 0                   | 21                 | 0                   |
| <b>seq1378</b> | Firmicutes    | Clostridia   | 0                  | 0                   | 30                 | 0                   |



Sequence Count Table

|                | <b>Phylum</b> | <b>Class</b> | <b>Subject10WK0</b> | <b>Subject10WK12</b> | <b>Subject22WK0</b> | <b>Subject22WK12</b> |
|----------------|---------------|--------------|---------------------|----------------------|---------------------|----------------------|
| <b>seq109</b>  | Firmicutes    | Clostridia   | 21                  | 63                   | 18                  | 19                   |
| <b>seq253</b>  | Firmicutes    | Clostridia   | 78                  | 44                   | 0                   | 0                    |
| <b>seq340</b>  | Firmicutes    | Clostridia   | 0                   | 0                    | 0                   | 0                    |
| <b>seq447</b>  | Firmicutes    | Clostridia   | 0                   | 0                    | 30                  | 28                   |
| <b>seq560</b>  | Firmicutes    | Clostridia   | 0                   | 0                    | 0                   | 0                    |
| <b>seq671</b>  | Firmicutes    | Clostridia   | 0                   | 0                    | 0                   | 0                    |
| <b>seq677</b>  | Firmicutes    | Clostridia   | 0                   | 0                    | 0                   | 0                    |
| <b>seq821</b>  | Firmicutes    | Clostridia   | 0                   | 0                    | 0                   | 0                    |
| <b>seq851</b>  | Firmicutes    | Clostridia   | 0                   | 0                    | 0                   | 0                    |
| <b>seq1000</b> | Firmicutes    | Clostridia   | 0                   | 0                    | 0                   | 0                    |
| <b>seq1183</b> | Firmicutes    | Clostridia   | 0                   | 0                    | 0                   | 0                    |
| <b>seq1263</b> | Firmicutes    | Clostridia   | 0                   | 0                    | 0                   | 0                    |
| <b>seq1318</b> | Firmicutes    | Clostridia   | 0                   | 0                    | 0                   | 0                    |
| <b>seq1323</b> | Firmicutes    | Clostridia   | 0                   | 0                    | 0                   | 0                    |
| <b>seq1388</b> | Firmicutes    | Clostridia   | 0                   | 0                    | 10                  | 0                    |
| <b>seq1668</b> | Firmicutes    | Clostridia   | 0                   | 0                    | 0                   | 0                    |
| <b>seq70</b>   | Firmicutes    | Clostridia   | 0                   | 0                    | 767                 | 583                  |
| <b>seq207</b>  | Firmicutes    | Clostridia   | 0                   | 0                    | 0                   | 0                    |
| <b>seq216</b>  | Firmicutes    | Clostridia   | 0                   | 0                    | 0                   | 0                    |
| <b>seq170</b>  | Firmicutes    | Clostridia   | 690                 | 104                  | 0                   | 0                    |
| <b>seq266</b>  | Firmicutes    | Clostridia   | 0                   | 0                    | 87                  | 69                   |
| <b>seq470</b>  | Firmicutes    | Clostridia   | 0                   | 0                    | 0                   | 0                    |
| <b>seq529</b>  | Firmicutes    | Clostridia   | 33                  | 22                   | 0                   | 0                    |
| <b>seq646</b>  | Firmicutes    | Clostridia   | 0                   | 0                    | 0                   | 0                    |
| <b>seq686</b>  | Firmicutes    | Clostridia   | 0                   | 0                    | 33                  | 30                   |
| <b>seq873</b>  | Firmicutes    | Clostridia   | 0                   | 0                    | 0                   | 0                    |
| <b>seq976</b>  | Firmicutes    | Clostridia   | 0                   | 0                    | 0                   | 0                    |
| <b>seq985</b>  | Firmicutes    | Clostridia   | 0                   | 0                    | 0                   | 0                    |
| <b>seq1089</b> | Firmicutes    | Clostridia   | 0                   | 0                    | 66                  | 43                   |
| <b>seq1238</b> | Firmicutes    | Clostridia   | 0                   | 0                    | 0                   | 0                    |
| <b>seq1320</b> | Firmicutes    | Clostridia   | 0                   | 0                    | 0                   | 0                    |
| <b>seq1378</b> | Firmicutes    | Clostridia   | 0                   | 0                    | 0                   | 0                    |

Sequence Count Table

|                | <b>Phylum</b> | <b>Class</b> | <b>Subject23WK0</b> | <b>Subject23WK12</b> | <b>Subject24WK0</b> | <b>Subject24WK12</b> |
|----------------|---------------|--------------|---------------------|----------------------|---------------------|----------------------|
| <b>seq109</b>  | Firmicutes    | Clostridia   | 12                  | 24                   | 35                  | 140                  |
| <b>seq253</b>  | Firmicutes    | Clostridia   | 0                   | 0                    | 52                  | 49                   |
| <b>seq340</b>  | Firmicutes    | Clostridia   | 0                   | 0                    | 0                   | 0                    |
| <b>seq447</b>  | Firmicutes    | Clostridia   | 27                  | 39                   | 0                   | 0                    |
| <b>seq560</b>  | Firmicutes    | Clostridia   | 0                   | 0                    | 0                   | 0                    |
| <b>seq671</b>  | Firmicutes    | Clostridia   | 0                   | 0                    | 0                   | 0                    |
| <b>seq677</b>  | Firmicutes    | Clostridia   | 0                   | 16                   | 21                  | 0                    |
| <b>seq821</b>  | Firmicutes    | Clostridia   | 0                   | 0                    | 0                   | 0                    |
| <b>seq851</b>  | Firmicutes    | Clostridia   | 0                   | 0                    | 0                   | 0                    |
| <b>seq1000</b> | Firmicutes    | Clostridia   | 0                   | 0                    | 0                   | 0                    |
| <b>seq1183</b> | Firmicutes    | Clostridia   | 0                   | 0                    | 0                   | 0                    |
| <b>seq1263</b> | Firmicutes    | Clostridia   | 0                   | 0                    | 0                   | 0                    |
| <b>seq1318</b> | Firmicutes    | Clostridia   | 0                   | 0                    | 0                   | 0                    |
| <b>seq1323</b> | Firmicutes    | Clostridia   | 0                   | 0                    | 0                   | 0                    |
| <b>seq1388</b> | Firmicutes    | Clostridia   | 0                   | 0                    | 0                   | 0                    |
| <b>seq1668</b> | Firmicutes    | Clostridia   | 0                   | 0                    | 0                   | 0                    |
| <b>seq70</b>   | Firmicutes    | Clostridia   | 0                   | 0                    | 435                 | 898                  |
| <b>seq207</b>  | Firmicutes    | Clostridia   | 804                 | 1314                 | 0                   | 0                    |
| <b>seq216</b>  | Firmicutes    | Clostridia   | 72                  | 0                    | 1132                | 2212                 |
| <b>seq170</b>  | Firmicutes    | Clostridia   | 0                   | 0                    | 0                   | 0                    |
| <b>seq266</b>  | Firmicutes    | Clostridia   | 34                  | 27                   | 68                  | 94                   |
| <b>seq470</b>  | Firmicutes    | Clostridia   | 0                   | 0                    | 0                   | 0                    |
| <b>seq529</b>  | Firmicutes    | Clostridia   | 0                   | 18                   | 0                   | 13                   |
| <b>seq646</b>  | Firmicutes    | Clostridia   | 0                   | 0                    | 0                   | 0                    |
| <b>seq686</b>  | Firmicutes    | Clostridia   | 0                   | 0                    | 0                   | 0                    |
| <b>seq873</b>  | Firmicutes    | Clostridia   | 0                   | 0                    | 0                   | 0                    |
| <b>seq976</b>  | Firmicutes    | Clostridia   | 0                   | 29                   | 0                   | 0                    |
| <b>seq985</b>  | Firmicutes    | Clostridia   | 84                  | 0                    | 0                   | 57                   |
| <b>seq1089</b> | Firmicutes    | Clostridia   | 0                   | 0                    | 0                   | 0                    |
| <b>seq1238</b> | Firmicutes    | Clostridia   | 0                   | 0                    | 0                   | 0                    |
| <b>seq1320</b> | Firmicutes    | Clostridia   | 0                   | 0                    | 0                   | 0                    |
| <b>seq1378</b> | Firmicutes    | Clostridia   | 0                   | 0                    | 0                   | 0                    |

Sequence Count Table

|                | <b>Phylum</b> | <b>Class</b> | <b>Subject11WK0</b> | <b>Subject11WK12</b> | <b>Subject12WK0</b> | <b>Subject12WK12</b> |
|----------------|---------------|--------------|---------------------|----------------------|---------------------|----------------------|
| <b>seq109</b>  | Firmicutes    | Clostridia   | 574                 | 71                   | 28                  | 105                  |
| <b>seq253</b>  | Firmicutes    | Clostridia   | 66                  | 0                    | 0                   | 0                    |
| <b>seq340</b>  | Firmicutes    | Clostridia   | 31                  | 0                    | 0                   | 0                    |
| <b>seq447</b>  | Firmicutes    | Clostridia   | 48                  | 0                    | 0                   | 0                    |
| <b>seq560</b>  | Firmicutes    | Clostridia   | 0                   | 0                    | 0                   | 0                    |
| <b>seq671</b>  | Firmicutes    | Clostridia   | 22                  | 0                    | 0                   | 0                    |
| <b>seq677</b>  | Firmicutes    | Clostridia   | 0                   | 0                    | 0                   | 0                    |
| <b>seq821</b>  | Firmicutes    | Clostridia   | 90                  | 21                   | 0                   | 0                    |
| <b>seq851</b>  | Firmicutes    | Clostridia   | 0                   | 0                    | 0                   | 0                    |
| <b>seq1000</b> | Firmicutes    | Clostridia   | 0                   | 0                    | 11                  | 16                   |
| <b>seq1183</b> | Firmicutes    | Clostridia   | 0                   | 0                    | 0                   | 0                    |
| <b>seq1263</b> | Firmicutes    | Clostridia   | 0                   | 0                    | 0                   | 0                    |
| <b>seq1318</b> | Firmicutes    | Clostridia   | 0                   | 0                    | 0                   | 0                    |
| <b>seq1323</b> | Firmicutes    | Clostridia   | 0                   | 0                    | 0                   | 0                    |
| <b>seq1388</b> | Firmicutes    | Clostridia   | 0                   | 0                    | 0                   | 0                    |
| <b>seq1668</b> | Firmicutes    | Clostridia   | 9                   | 0                    | 0                   | 0                    |
| <b>seq70</b>   | Firmicutes    | Clostridia   | 0                   | 0                    | 0                   | 0                    |
| <b>seq207</b>  | Firmicutes    | Clostridia   | 0                   | 0                    | 0                   | 0                    |
| <b>seq216</b>  | Firmicutes    | Clostridia   | 0                   | 0                    | 0                   | 0                    |
| <b>seq170</b>  | Firmicutes    | Clostridia   | 0                   | 0                    | 0                   | 10                   |
| <b>seq266</b>  | Firmicutes    | Clostridia   | 0                   | 0                    | 68                  | 121                  |
| <b>seq470</b>  | Firmicutes    | Clostridia   | 0                   | 0                    | 0                   | 0                    |
| <b>seq529</b>  | Firmicutes    | Clostridia   | 0                   | 0                    | 0                   | 0                    |
| <b>seq646</b>  | Firmicutes    | Clostridia   | 450                 | 6                    | 0                   | 0                    |
| <b>seq686</b>  | Firmicutes    | Clostridia   | 0                   | 0                    | 0                   | 0                    |
| <b>seq873</b>  | Firmicutes    | Clostridia   | 0                   | 0                    | 0                   | 0                    |
| <b>seq976</b>  | Firmicutes    | Clostridia   | 0                   | 0                    | 0                   | 0                    |
| <b>seq985</b>  | Firmicutes    | Clostridia   | 0                   | 0                    | 7                   | 0                    |
| <b>seq1089</b> | Firmicutes    | Clostridia   | 0                   | 0                    | 0                   | 0                    |
| <b>seq1238</b> | Firmicutes    | Clostridia   | 0                   | 0                    | 0                   | 0                    |
| <b>seq1320</b> | Firmicutes    | Clostridia   | 0                   | 0                    | 0                   | 0                    |
| <b>seq1378</b> | Firmicutes    | Clostridia   | 0                   | 0                    | 0                   | 14                   |

Sequence Count Table

|                | <b>Phylum</b> | <b>Class</b> | <b>Subject25WK0</b> | <b>Subject25WK12</b> | <b>Subject38WK0</b> | <b>Subject38WK12</b> |
|----------------|---------------|--------------|---------------------|----------------------|---------------------|----------------------|
| <b>seq109</b>  | Firmicutes    | Clostridia   | 173                 | 174                  | 0                   | 0                    |
| <b>seq253</b>  | Firmicutes    | Clostridia   | 52                  | 48                   | 0                   | 0                    |
| <b>seq340</b>  | Firmicutes    | Clostridia   | 300                 | 341                  | 0                   | 0                    |
| <b>seq447</b>  | Firmicutes    | Clostridia   | 52                  | 0                    | 0                   | 0                    |
| <b>seq560</b>  | Firmicutes    | Clostridia   | 0                   | 0                    | 0                   | 0                    |
| <b>seq671</b>  | Firmicutes    | Clostridia   | 0                   | 0                    | 0                   | 0                    |
| <b>seq677</b>  | Firmicutes    | Clostridia   | 0                   | 15                   | 0                   | 0                    |
| <b>seq821</b>  | Firmicutes    | Clostridia   | 0                   | 0                    | 0                   | 0                    |
| <b>seq851</b>  | Firmicutes    | Clostridia   | 0                   | 0                    | 0                   | 0                    |
| <b>seq1000</b> | Firmicutes    | Clostridia   | 0                   | 0                    | 0                   | 0                    |
| <b>seq1183</b> | Firmicutes    | Clostridia   | 0                   | 0                    | 0                   | 0                    |
| <b>seq1263</b> | Firmicutes    | Clostridia   | 0                   | 0                    | 0                   | 0                    |
| <b>seq1318</b> | Firmicutes    | Clostridia   | 0                   | 0                    | 0                   | 0                    |
| <b>seq1323</b> | Firmicutes    | Clostridia   | 0                   | 0                    | 0                   | 0                    |
| <b>seq1388</b> | Firmicutes    | Clostridia   | 11                  | 0                    | 0                   | 0                    |
| <b>seq1668</b> | Firmicutes    | Clostridia   | 0                   | 0                    | 0                   | 0                    |
| <b>seq70</b>   | Firmicutes    | Clostridia   | 514                 | 104                  | 0                   | 0                    |
| <b>seq207</b>  | Firmicutes    | Clostridia   | 0                   | 0                    | 0                   | 0                    |
| <b>seq216</b>  | Firmicutes    | Clostridia   | 233                 | 0                    | 0                   | 0                    |
| <b>seq170</b>  | Firmicutes    | Clostridia   | 0                   | 0                    | 0                   | 0                    |
| <b>seq266</b>  | Firmicutes    | Clostridia   | 0                   | 0                    | 0                   | 0                    |
| <b>seq470</b>  | Firmicutes    | Clostridia   | 0                   | 0                    | 0                   | 0                    |
| <b>seq529</b>  | Firmicutes    | Clostridia   | 0                   | 0                    | 0                   | 0                    |
| <b>seq646</b>  | Firmicutes    | Clostridia   | 15                  | 0                    | 0                   | 0                    |
| <b>seq686</b>  | Firmicutes    | Clostridia   | 75                  | 12                   | 0                   | 0                    |
| <b>seq873</b>  | Firmicutes    | Clostridia   | 0                   | 0                    | 0                   | 0                    |
| <b>seq976</b>  | Firmicutes    | Clostridia   | 0                   | 0                    | 0                   | 0                    |
| <b>seq985</b>  | Firmicutes    | Clostridia   | 0                   | 0                    | 0                   | 0                    |
| <b>seq1089</b> | Firmicutes    | Clostridia   | 0                   | 0                    | 0                   | 0                    |
| <b>seq1238</b> | Firmicutes    | Clostridia   | 19                  | 0                    | 0                   | 0                    |
| <b>seq1320</b> | Firmicutes    | Clostridia   | 32                  | 0                    | 0                   | 0                    |
| <b>seq1378</b> | Firmicutes    | Clostridia   | 0                   | 0                    | 0                   | 0                    |

Sequence Count Table

|                | <b>Phylum</b> | <b>Class</b> | <b>Subject31WK0</b> | <b>Subject31WK12</b> | <b>Subject32WK0</b> | <b>Subject32WK12</b> |
|----------------|---------------|--------------|---------------------|----------------------|---------------------|----------------------|
| <b>seq109</b>  | Firmicutes    | Clostridia   | 0                   | 0                    | 151                 | 0                    |
| <b>seq253</b>  | Firmicutes    | Clostridia   | 0                   | 0                    | 29                  | 0                    |
| <b>seq340</b>  | Firmicutes    | Clostridia   | 0                   | 0                    | 19                  | 0                    |
| <b>seq447</b>  | Firmicutes    | Clostridia   | 0                   | 0                    | 0                   | 0                    |
| <b>seq560</b>  | Firmicutes    | Clostridia   | 0                   | 0                    | 0                   | 0                    |
| <b>seq671</b>  | Firmicutes    | Clostridia   | 0                   | 0                    | 0                   | 0                    |
| <b>seq677</b>  | Firmicutes    | Clostridia   | 0                   | 0                    | 0                   | 0                    |
| <b>seq821</b>  | Firmicutes    | Clostridia   | 0                   | 0                    | 0                   | 0                    |
| <b>seq851</b>  | Firmicutes    | Clostridia   | 0                   | 0                    | 76                  | 0                    |
| <b>seq1000</b> | Firmicutes    | Clostridia   | 0                   | 0                    | 0                   | 0                    |
| <b>seq1183</b> | Firmicutes    | Clostridia   | 0                   | 0                    | 0                   | 0                    |
| <b>seq1263</b> | Firmicutes    | Clostridia   | 0                   | 0                    | 0                   | 0                    |
| <b>seq1318</b> | Firmicutes    | Clostridia   | 0                   | 0                    | 0                   | 0                    |
| <b>seq1323</b> | Firmicutes    | Clostridia   | 0                   | 0                    | 0                   | 0                    |
| <b>seq1388</b> | Firmicutes    | Clostridia   | 0                   | 0                    | 0                   | 0                    |
| <b>seq1668</b> | Firmicutes    | Clostridia   | 0                   | 0                    | 0                   | 0                    |
| <b>seq70</b>   | Firmicutes    | Clostridia   | 0                   | 0                    | 0                   | 0                    |
| <b>seq207</b>  | Firmicutes    | Clostridia   | 0                   | 0                    | 0                   | 0                    |
| <b>seq216</b>  | Firmicutes    | Clostridia   | 0                   | 0                    | 0                   | 0                    |
| <b>seq170</b>  | Firmicutes    | Clostridia   | 0                   | 0                    | 0                   | 0                    |
| <b>seq266</b>  | Firmicutes    | Clostridia   | 0                   | 0                    | 0                   | 0                    |
| <b>seq470</b>  | Firmicutes    | Clostridia   | 0                   | 0                    | 0                   | 0                    |
| <b>seq529</b>  | Firmicutes    | Clostridia   | 0                   | 0                    | 0                   | 0                    |
| <b>seq646</b>  | Firmicutes    | Clostridia   | 0                   | 0                    | 0                   | 0                    |
| <b>seq686</b>  | Firmicutes    | Clostridia   | 0                   | 0                    | 0                   | 0                    |
| <b>seq873</b>  | Firmicutes    | Clostridia   | 0                   | 0                    | 0                   | 0                    |
| <b>seq976</b>  | Firmicutes    | Clostridia   | 0                   | 0                    | 0                   | 0                    |
| <b>seq985</b>  | Firmicutes    | Clostridia   | 0                   | 0                    | 0                   | 0                    |
| <b>seq1089</b> | Firmicutes    | Clostridia   | 0                   | 0                    | 0                   | 0                    |
| <b>seq1238</b> | Firmicutes    | Clostridia   | 0                   | 0                    | 0                   | 0                    |
| <b>seq1320</b> | Firmicutes    | Clostridia   | 0                   | 0                    | 0                   | 0                    |
| <b>seq1378</b> | Firmicutes    | Clostridia   | 0                   | 0                    | 0                   | 0                    |

Sequence Count Table

|                | <b>Phylum</b> | <b>Class</b> | <b>Subject13WK0</b> | <b>Subject13WK12</b> | <b>Subject39WK0</b> | <b>Subject39WK12</b> |
|----------------|---------------|--------------|---------------------|----------------------|---------------------|----------------------|
| <b>seq109</b>  | Firmicutes    | Clostridia   | 178                 | 21                   | 0                   | 0                    |
| <b>seq253</b>  | Firmicutes    | Clostridia   | 44                  | 32                   | 0                   | 0                    |
| <b>seq340</b>  | Firmicutes    | Clostridia   | 35                  | 0                    | 0                   | 0                    |
| <b>seq447</b>  | Firmicutes    | Clostridia   | 28                  | 16                   | 0                   | 0                    |
| <b>seq560</b>  | Firmicutes    | Clostridia   | 0                   | 0                    | 0                   | 0                    |
| <b>seq671</b>  | Firmicutes    | Clostridia   | 0                   | 0                    | 0                   | 0                    |
| <b>seq677</b>  | Firmicutes    | Clostridia   | 21                  | 11                   | 0                   | 0                    |
| <b>seq821</b>  | Firmicutes    | Clostridia   | 0                   | 0                    | 0                   | 0                    |
| <b>seq851</b>  | Firmicutes    | Clostridia   | 0                   | 0                    | 0                   | 0                    |
| <b>seq1000</b> | Firmicutes    | Clostridia   | 0                   | 0                    | 0                   | 0                    |
| <b>seq1183</b> | Firmicutes    | Clostridia   | 0                   | 0                    | 0                   | 0                    |
| <b>seq1263</b> | Firmicutes    | Clostridia   | 0                   | 0                    | 0                   | 0                    |
| <b>seq1318</b> | Firmicutes    | Clostridia   | 0                   | 0                    | 0                   | 0                    |
| <b>seq1323</b> | Firmicutes    | Clostridia   | 0                   | 0                    | 0                   | 0                    |
| <b>seq1388</b> | Firmicutes    | Clostridia   | 0                   | 0                    | 0                   | 0                    |
| <b>seq1668</b> | Firmicutes    | Clostridia   | 0                   | 0                    | 0                   | 0                    |
| <b>seq70</b>   | Firmicutes    | Clostridia   | 3946                | 1672                 | 0                   | 0                    |
| <b>seq207</b>  | Firmicutes    | Clostridia   | 0                   | 0                    | 0                   | 0                    |
| <b>seq216</b>  | Firmicutes    | Clostridia   | 0                   | 0                    | 0                   | 0                    |
| <b>seq170</b>  | Firmicutes    | Clostridia   | 57                  | 31                   | 0                   | 258                  |
| <b>seq266</b>  | Firmicutes    | Clostridia   | 0                   | 0                    | 0                   | 195                  |
| <b>seq470</b>  | Firmicutes    | Clostridia   | 201                 | 98                   | 0                   | 0                    |
| <b>seq529</b>  | Firmicutes    | Clostridia   | 0                   | 0                    | 0                   | 11                   |
| <b>seq646</b>  | Firmicutes    | Clostridia   | 0                   | 0                    | 0                   | 0                    |
| <b>seq686</b>  | Firmicutes    | Clostridia   | 18                  | 26                   | 0                   | 0                    |
| <b>seq873</b>  | Firmicutes    | Clostridia   | 0                   | 0                    | 0                   | 0                    |
| <b>seq976</b>  | Firmicutes    | Clostridia   | 0                   | 0                    | 0                   | 0                    |
| <b>seq985</b>  | Firmicutes    | Clostridia   | 0                   | 0                    | 0                   | 0                    |
| <b>seq1089</b> | Firmicutes    | Clostridia   | 0                   | 0                    | 0                   | 0                    |
| <b>seq1238</b> | Firmicutes    | Clostridia   | 29                  | 22                   | 0                   | 0                    |
| <b>seq1320</b> | Firmicutes    | Clostridia   | 0                   | 0                    | 0                   | 0                    |
| <b>seq1378</b> | Firmicutes    | Clostridia   | 0                   | 0                    | 0                   | 0                    |

Sequence Count Table

|                | <b>Phylum</b> | <b>Class</b> | <b>Subject26WK0</b> | <b>Subject26WK12</b> | <b>Subject14WK0</b> | <b>Subject14WK12</b> |
|----------------|---------------|--------------|---------------------|----------------------|---------------------|----------------------|
| <b>seq109</b>  | Firmicutes    | Clostridia   | 65                  | 266                  | 56                  | 68                   |
| <b>seq253</b>  | Firmicutes    | Clostridia   | 19                  | 206                  | 0                   | 0                    |
| <b>seq340</b>  | Firmicutes    | Clostridia   | 0                   | 0                    | 0                   | 0                    |
| <b>seq447</b>  | Firmicutes    | Clostridia   | 0                   | 0                    | 13                  | 52                   |
| <b>seq560</b>  | Firmicutes    | Clostridia   | 182                 | 440                  | 0                   | 0                    |
| <b>seq671</b>  | Firmicutes    | Clostridia   | 0                   | 0                    | 0                   | 0                    |
| <b>seq677</b>  | Firmicutes    | Clostridia   | 0                   | 15                   | 0                   | 0                    |
| <b>seq821</b>  | Firmicutes    | Clostridia   | 0                   | 0                    | 0                   | 0                    |
| <b>seq851</b>  | Firmicutes    | Clostridia   | 0                   | 0                    | 0                   | 0                    |
| <b>seq1000</b> | Firmicutes    | Clostridia   | 0                   | 0                    | 0                   | 0                    |
| <b>seq1183</b> | Firmicutes    | Clostridia   | 0                   | 0                    | 0                   | 0                    |
| <b>seq1263</b> | Firmicutes    | Clostridia   | 23                  | 42                   | 0                   | 0                    |
| <b>seq1318</b> | Firmicutes    | Clostridia   | 0                   | 0                    | 0                   | 0                    |
| <b>seq1323</b> | Firmicutes    | Clostridia   | 0                   | 0                    | 0                   | 0                    |
| <b>seq1388</b> | Firmicutes    | Clostridia   | 0                   | 9                    | 0                   | 0                    |
| <b>seq1668</b> | Firmicutes    | Clostridia   | 0                   | 0                    | 0                   | 0                    |
| <b>seq70</b>   | Firmicutes    | Clostridia   | 0                   | 0                    | 0                   | 0                    |
| <b>seq207</b>  | Firmicutes    | Clostridia   | 0                   | 0                    | 284                 | 158                  |
| <b>seq216</b>  | Firmicutes    | Clostridia   | 0                   | 0                    | 0                   | 0                    |
| <b>seq170</b>  | Firmicutes    | Clostridia   | 314                 | 428                  | 0                   | 0                    |
| <b>seq266</b>  | Firmicutes    | Clostridia   | 0                   | 0                    | 60                  | 36                   |
| <b>seq470</b>  | Firmicutes    | Clostridia   | 0                   | 0                    | 0                   | 0                    |
| <b>seq529</b>  | Firmicutes    | Clostridia   | 22                  | 60                   | 13                  | 22                   |
| <b>seq646</b>  | Firmicutes    | Clostridia   | 0                   | 0                    | 0                   | 0                    |
| <b>seq686</b>  | Firmicutes    | Clostridia   | 0                   | 0                    | 33                  | 73                   |
| <b>seq873</b>  | Firmicutes    | Clostridia   | 0                   | 0                    | 0                   | 0                    |
| <b>seq976</b>  | Firmicutes    | Clostridia   | 0                   | 0                    | 42                  | 36                   |
| <b>seq985</b>  | Firmicutes    | Clostridia   | 0                   | 0                    | 0                   | 0                    |
| <b>seq1089</b> | Firmicutes    | Clostridia   | 0                   | 0                    | 0                   | 0                    |
| <b>seq1238</b> | Firmicutes    | Clostridia   | 0                   | 0                    | 0                   | 0                    |
| <b>seq1320</b> | Firmicutes    | Clostridia   | 0                   | 0                    | 0                   | 0                    |
| <b>seq1378</b> | Firmicutes    | Clostridia   | 0                   | 0                    | 0                   | 0                    |

Sequence Count Table

|                | <b>Phylum</b> | <b>Class</b> | <b>Subject27WK0</b> | <b>Subject27WK12</b> | <b>Subject15WK0</b> | <b>Subject15WK12</b> |
|----------------|---------------|--------------|---------------------|----------------------|---------------------|----------------------|
| <b>seq109</b>  | Firmicutes    | Clostridia   | 0                   | 0                    | 860                 | 0                    |
| <b>seq253</b>  | Firmicutes    | Clostridia   | 91                  | 63                   | 90                  | 83                   |
| <b>seq340</b>  | Firmicutes    | Clostridia   | 0                   | 0                    | 57                  | 0                    |
| <b>seq447</b>  | Firmicutes    | Clostridia   | 0                   | 0                    | 0                   | 0                    |
| <b>seq560</b>  | Firmicutes    | Clostridia   | 0                   | 0                    | 0                   | 0                    |
| <b>seq671</b>  | Firmicutes    | Clostridia   | 0                   | 24                   | 15                  | 0                    |
| <b>seq677</b>  | Firmicutes    | Clostridia   | 0                   | 0                    | 0                   | 0                    |
| <b>seq821</b>  | Firmicutes    | Clostridia   | 0                   | 0                    | 11                  | 0                    |
| <b>seq851</b>  | Firmicutes    | Clostridia   | 0                   | 0                    | 0                   | 0                    |
| <b>seq1000</b> | Firmicutes    | Clostridia   | 0                   | 0                    | 0                   | 0                    |
| <b>seq1183</b> | Firmicutes    | Clostridia   | 0                   | 0                    | 0                   | 0                    |
| <b>seq1263</b> | Firmicutes    | Clostridia   | 0                   | 0                    | 0                   | 0                    |
| <b>seq1318</b> | Firmicutes    | Clostridia   | 0                   | 0                    | 0                   | 0                    |
| <b>seq1323</b> | Firmicutes    | Clostridia   | 0                   | 0                    | 0                   | 0                    |
| <b>seq1388</b> | Firmicutes    | Clostridia   | 0                   | 0                    | 0                   | 0                    |
| <b>seq1668</b> | Firmicutes    | Clostridia   | 0                   | 6                    | 0                   | 0                    |
| <b>seq70</b>   | Firmicutes    | Clostridia   | 87                  | 60                   | 0                   | 0                    |
| <b>seq207</b>  | Firmicutes    | Clostridia   | 0                   | 0                    | 0                   | 0                    |
| <b>seq216</b>  | Firmicutes    | Clostridia   | 0                   | 0                    | 0                   | 0                    |
| <b>seq170</b>  | Firmicutes    | Clostridia   | 254                 | 243                  | 38                  | 43                   |
| <b>seq266</b>  | Firmicutes    | Clostridia   | 165                 | 198                  | 0                   | 0                    |
| <b>seq470</b>  | Firmicutes    | Clostridia   | 0                   | 0                    | 0                   | 0                    |
| <b>seq529</b>  | Firmicutes    | Clostridia   | 0                   | 0                    | 17                  | 7                    |
| <b>seq646</b>  | Firmicutes    | Clostridia   | 0                   | 0                    | 0                   | 0                    |
| <b>seq686</b>  | Firmicutes    | Clostridia   | 0                   | 0                    | 0                   | 0                    |
| <b>seq873</b>  | Firmicutes    | Clostridia   | 112                 | 100                  | 0                   | 0                    |
| <b>seq976</b>  | Firmicutes    | Clostridia   | 0                   | 0                    | 0                   | 0                    |
| <b>seq985</b>  | Firmicutes    | Clostridia   | 0                   | 0                    | 0                   | 0                    |
| <b>seq1089</b> | Firmicutes    | Clostridia   | 0                   | 0                    | 0                   | 0                    |
| <b>seq1238</b> | Firmicutes    | Clostridia   | 0                   | 0                    | 0                   | 0                    |
| <b>seq1320</b> | Firmicutes    | Clostridia   | 0                   | 0                    | 0                   | 0                    |
| <b>seq1378</b> | Firmicutes    | Clostridia   | 0                   | 0                    | 0                   | 0                    |



Sequence Count Table

|                | <b>Phylum</b> | <b>Class</b> | <b>Δ</b> |  |  |  |
|----------------|---------------|--------------|----------|--|--|--|
| <b>seq109</b>  | Firmicutes    | Clostridia   |          |  |  |  |
| <b>seq253</b>  | Firmicutes    | Clostridia   |          |  |  |  |
| <b>seq340</b>  | Firmicutes    | Clostridia   |          |  |  |  |
| <b>seq447</b>  | Firmicutes    | Clostridia   |          |  |  |  |
| <b>seq560</b>  | Firmicutes    | Clostridia   |          |  |  |  |
| <b>seq671</b>  | Firmicutes    | Clostridia   |          |  |  |  |
| <b>seq677</b>  | Firmicutes    | Clostridia   |          |  |  |  |
| <b>seq821</b>  | Firmicutes    | Clostridia   |          |  |  |  |
| <b>seq851</b>  | Firmicutes    | Clostridia   |          |  |  |  |
| <b>seq1000</b> | Firmicutes    | Clostridia   |          |  |  |  |
| <b>seq1183</b> | Firmicutes    | Clostridia   |          |  |  |  |
| <b>seq1263</b> | Firmicutes    | Clostridia   |          |  |  |  |
| <b>seq1318</b> | Firmicutes    | Clostridia   |          |  |  |  |
| <b>seq1323</b> | Firmicutes    | Clostridia   |          |  |  |  |
| <b>seq1388</b> | Firmicutes    | Clostridia   |          |  |  |  |
| <b>seq1668</b> | Firmicutes    | Clostridia   |          |  |  |  |
| <b>seq70</b>   | Firmicutes    | Clostridia   |          |  |  |  |
| <b>seq207</b>  | Firmicutes    | Clostridia   |          |  |  |  |
| <b>seq216</b>  | Firmicutes    | Clostridia   |          |  |  |  |
| <b>seq170</b>  | Firmicutes    | Clostridia   |          |  |  |  |
| <b>seq266</b>  | Firmicutes    | Clostridia   |          |  |  |  |
| <b>seq470</b>  | Firmicutes    | Clostridia   |          |  |  |  |
| <b>seq529</b>  | Firmicutes    | Clostridia   |          |  |  |  |
| <b>seq646</b>  | Firmicutes    | Clostridia   |          |  |  |  |
| <b>seq686</b>  | Firmicutes    | Clostridia   |          |  |  |  |
| <b>seq873</b>  | Firmicutes    | Clostridia   |          |  |  |  |
| <b>seq976</b>  | Firmicutes    | Clostridia   |          |  |  |  |
| <b>seq985</b>  | Firmicutes    | Clostridia   |          |  |  |  |
| <b>seq1089</b> | Firmicutes    | Clostridia   |          |  |  |  |
| <b>seq1238</b> | Firmicutes    | Clostridia   |          |  |  |  |
| <b>seq1320</b> | Firmicutes    | Clostridia   |          |  |  |  |
| <b>seq1378</b> | Firmicutes    | Clostridia   |          |  |  |  |

Sequence Count Table

|                | <b>Phylum</b> | <b>Class</b> | <b>Order</b>  | <b>Family</b>   |
|----------------|---------------|--------------|---------------|-----------------|
| <b>seq1422</b> | Firmicutes    | Clostridia   | Clostridiales | Ruminococcaceae |
| <b>seq1550</b> | Firmicutes    | Clostridia   | Clostridiales | Ruminococcaceae |
| <b>seq1597</b> | Firmicutes    | Clostridia   | Clostridiales | Ruminococcaceae |
| <b>seq1653</b> | Firmicutes    | Clostridia   | Clostridiales | Ruminococcaceae |
| <b>seq1736</b> | Firmicutes    | Clostridia   | Clostridiales | Ruminococcaceae |
| <b>seq183</b>  | Firmicutes    | Clostridia   | Clostridiales | Ruminococcaceae |
| <b>seq215</b>  | Firmicutes    | Clostridia   | Clostridiales | Ruminococcaceae |
| <b>seq533</b>  | Firmicutes    | Clostridia   | Clostridiales | Ruminococcaceae |
| <b>seq578</b>  | Firmicutes    | Clostridia   | Clostridiales | Ruminococcaceae |
| <b>seq614</b>  | Firmicutes    | Clostridia   | Clostridiales | Ruminococcaceae |
| <b>seq631</b>  | Firmicutes    | Clostridia   | Clostridiales | Ruminococcaceae |
| <b>seq1095</b> | Firmicutes    | Clostridia   | Clostridiales | Ruminococcaceae |
| <b>seq1227</b> | Firmicutes    | Clostridia   | Clostridiales | Ruminococcaceae |
| <b>seq1575</b> | Firmicutes    | Clostridia   | Clostridiales | Ruminococcaceae |
| <b>seq1738</b> | Firmicutes    | Clostridia   | Clostridiales | Ruminococcaceae |
| <b>seq65</b>   | Firmicutes    | Clostridia   | Clostridiales | Ruminococcaceae |
| <b>seq120</b>  | Firmicutes    | Clostridia   | Clostridiales | Ruminococcaceae |
| <b>seq143</b>  | Firmicutes    | Clostridia   | Clostridiales | Ruminococcaceae |
| <b>seq149</b>  | Firmicutes    | Clostridia   | Clostridiales | Ruminococcaceae |
| <b>seq176</b>  | Firmicutes    | Clostridia   | Clostridiales | Ruminococcaceae |
| <b>seq354</b>  | Firmicutes    | Clostridia   | Clostridiales | Ruminococcaceae |
| <b>seq377</b>  | Firmicutes    | Clostridia   | Clostridiales | Ruminococcaceae |
| <b>seq592</b>  | Firmicutes    | Clostridia   | Clostridiales | Ruminococcaceae |
| <b>seq648</b>  | Firmicutes    | Clostridia   | Clostridiales | Ruminococcaceae |
| <b>seq687</b>  | Firmicutes    | Clostridia   | Clostridiales | Ruminococcaceae |
| <b>seq1257</b> | Firmicutes    | Clostridia   | Clostridiales | Ruminococcaceae |
| <b>seq1317</b> | Firmicutes    | Clostridia   | Clostridiales | Ruminococcaceae |
| <b>seq144</b>  | Firmicutes    | Clostridia   | Clostridiales | Ruminococcaceae |
| <b>seq423</b>  | Firmicutes    | Clostridia   | Clostridiales | Ruminococcaceae |
| <b>seq104</b>  | Firmicutes    | Clostridia   | Clostridiales | Ruminococcaceae |
| <b>seq312</b>  | Firmicutes    | Clostridia   | Clostridiales | Ruminococcaceae |
| <b>seq136</b>  | Firmicutes    | Clostridia   | Clostridiales | Ruminococcaceae |

Sequence Count Table

|                | <b>Phylum</b> | <b>Class</b> | <b>Genus</b>                  | <b>Species</b> |
|----------------|---------------|--------------|-------------------------------|----------------|
| <b>seq1422</b> | Firmicutes    | Clostridia   | Ruminiclostridium_9           |                |
| <b>seq1550</b> | Firmicutes    | Clostridia   | Ruminiclostridium_9           |                |
| <b>seq1597</b> | Firmicutes    | Clostridia   | Ruminiclostridium_9           |                |
| <b>seq1653</b> | Firmicutes    | Clostridia   | Ruminiclostridium_9           |                |
| <b>seq1736</b> | Firmicutes    | Clostridia   | Ruminiclostridium_9           |                |
| <b>seq183</b>  | Firmicutes    | Clostridia   | Ruminococcaceae_NK4A214_group |                |
| <b>seq215</b>  | Firmicutes    | Clostridia   | Ruminococcaceae_NK4A214_group |                |
| <b>seq533</b>  | Firmicutes    | Clostridia   | Ruminococcaceae_NK4A214_group |                |
| <b>seq578</b>  | Firmicutes    | Clostridia   | Ruminococcaceae_NK4A214_group |                |
| <b>seq614</b>  | Firmicutes    | Clostridia   | Ruminococcaceae_NK4A214_group |                |
| <b>seq631</b>  | Firmicutes    | Clostridia   | Ruminococcaceae_NK4A214_group |                |
| <b>seq1095</b> | Firmicutes    | Clostridia   | Ruminococcaceae_NK4A214_group |                |
| <b>seq1227</b> | Firmicutes    | Clostridia   | Ruminococcaceae_NK4A214_group |                |
| <b>seq1575</b> | Firmicutes    | Clostridia   | Ruminococcaceae_NK4A214_group |                |
| <b>seq1738</b> | Firmicutes    | Clostridia   | Ruminococcaceae_NK4A214_group |                |
| <b>seq65</b>   | Firmicutes    | Clostridia   | Ruminococcaceae_UCG-002       | bacterium      |
| <b>seq120</b>  | Firmicutes    | Clostridia   | Ruminococcaceae_UCG-002       |                |
| <b>seq143</b>  | Firmicutes    | Clostridia   | Ruminococcaceae_UCG-002       |                |
| <b>seq149</b>  | Firmicutes    | Clostridia   | Ruminococcaceae_UCG-002       |                |
| <b>seq176</b>  | Firmicutes    | Clostridia   | Ruminococcaceae_UCG-002       |                |
| <b>seq354</b>  | Firmicutes    | Clostridia   | Ruminococcaceae_UCG-002       |                |
| <b>seq377</b>  | Firmicutes    | Clostridia   | Ruminococcaceae_UCG-002       |                |
| <b>seq592</b>  | Firmicutes    | Clostridia   | Ruminococcaceae_UCG-002       |                |
| <b>seq648</b>  | Firmicutes    | Clostridia   | Ruminococcaceae_UCG-002       |                |
| <b>seq687</b>  | Firmicutes    | Clostridia   | Ruminococcaceae_UCG-002       |                |
| <b>seq1257</b> | Firmicutes    | Clostridia   | Ruminococcaceae_UCG-002       |                |
| <b>seq1317</b> | Firmicutes    | Clostridia   | Ruminococcaceae_UCG-002       |                |
| <b>seq144</b>  | Firmicutes    | Clostridia   | Ruminococcaceae_UCG-003       |                |
| <b>seq423</b>  | Firmicutes    | Clostridia   | Ruminococcaceae_UCG-003       |                |
| <b>seq104</b>  | Firmicutes    | Clostridia   | Ruminococcaceae_UCG-004       |                |
| <b>seq312</b>  | Firmicutes    | Clostridia   | Ruminococcaceae_UCG-004       |                |
| <b>seq136</b>  | Firmicutes    | Clostridia   | Ruminococcaceae_UCG-005       |                |

Sequence Count Table

|                | <b>Phylum</b> | <b>Class</b> | <b>Subject34WK0</b> | <b>Subject34WK12</b> | <b>Subject16WK0</b> | <b>Subject16WK12</b> |
|----------------|---------------|--------------|---------------------|----------------------|---------------------|----------------------|
| <b>seq1422</b> | Firmicutes    | Clostridia   | 0                   | 38                   | 0                   | 0                    |
| <b>seq1550</b> | Firmicutes    | Clostridia   | 0                   | 0                    | 0                   | 0                    |
| <b>seq1597</b> | Firmicutes    | Clostridia   | 0                   | 0                    | 0                   | 0                    |
| <b>seq1653</b> | Firmicutes    | Clostridia   | 0                   | 0                    | 0                   | 0                    |
| <b>seq1736</b> | Firmicutes    | Clostridia   | 0                   | 0                    | 0                   | 0                    |
| <b>seq183</b>  | Firmicutes    | Clostridia   | 142                 | 991                  | 0                   | 110                  |
| <b>seq215</b>  | Firmicutes    | Clostridia   | 0                   | 0                    | 388                 | 191                  |
| <b>seq533</b>  | Firmicutes    | Clostridia   | 0                   | 0                    | 0                   | 0                    |
| <b>seq578</b>  | Firmicutes    | Clostridia   | 0                   | 0                    | 0                   | 0                    |
| <b>seq614</b>  | Firmicutes    | Clostridia   | 0                   | 0                    | 0                   | 0                    |
| <b>seq631</b>  | Firmicutes    | Clostridia   | 0                   | 0                    | 0                   | 22                   |
| <b>seq1095</b> | Firmicutes    | Clostridia   | 0                   | 0                    | 0                   | 0                    |
| <b>seq1227</b> | Firmicutes    | Clostridia   | 0                   | 0                    | 0                   | 0                    |
| <b>seq1575</b> | Firmicutes    | Clostridia   | 0                   | 0                    | 0                   | 0                    |
| <b>seq1738</b> | Firmicutes    | Clostridia   | 0                   | 0                    | 0                   | 0                    |
| <b>seq65</b>   | Firmicutes    | Clostridia   | 317                 | 769                  | 555                 | 834                  |
| <b>seq120</b>  | Firmicutes    | Clostridia   | 0                   | 0                    | 0                   | 195                  |
| <b>seq143</b>  | Firmicutes    | Clostridia   | 0                   | 261                  | 61                  | 0                    |
| <b>seq149</b>  | Firmicutes    | Clostridia   | 0                   | 0                    | 37                  | 60                   |
| <b>seq176</b>  | Firmicutes    | Clostridia   | 0                   | 0                    | 0                   | 29                   |
| <b>seq354</b>  | Firmicutes    | Clostridia   | 0                   | 0                    | 237                 | 571                  |
| <b>seq377</b>  | Firmicutes    | Clostridia   | 17                  | 0                    | 0                   | 0                    |
| <b>seq592</b>  | Firmicutes    | Clostridia   | 0                   | 0                    | 0                   | 0                    |
| <b>seq648</b>  | Firmicutes    | Clostridia   | 98                  | 368                  | 0                   | 0                    |
| <b>seq687</b>  | Firmicutes    | Clostridia   | 0                   | 0                    | 0                   | 0                    |
| <b>seq1257</b> | Firmicutes    | Clostridia   | 0                   | 0                    | 0                   | 0                    |
| <b>seq1317</b> | Firmicutes    | Clostridia   | 0                   | 0                    | 0                   | 0                    |
| <b>seq144</b>  | Firmicutes    | Clostridia   | 239                 | 483                  | 135                 | 160                  |
| <b>seq423</b>  | Firmicutes    | Clostridia   | 0                   | 0                    | 32                  | 35                   |
| <b>seq104</b>  | Firmicutes    | Clostridia   | 34                  | 346                  | 114                 | 200                  |
| <b>seq312</b>  | Firmicutes    | Clostridia   | 0                   | 0                    | 0                   | 0                    |
| <b>seq136</b>  | Firmicutes    | Clostridia   | 10                  | 0                    | 15                  | 91                   |

Sequence Count Table

|                | <b>Phylum</b> | <b>Class</b> | <b>Subject17WK0</b> | <b>Subject17WK12</b> | <b>Subject1WK0</b> | <b>Subject1WK12</b> |
|----------------|---------------|--------------|---------------------|----------------------|--------------------|---------------------|
| <b>seq1422</b> | Firmicutes    | Clostridia   | 0                   | 0                    | 0                  | 0                   |
| <b>seq1550</b> | Firmicutes    | Clostridia   | 0                   | 0                    | 0                  | 0                   |
| <b>seq1597</b> | Firmicutes    | Clostridia   | 0                   | 0                    | 0                  | 0                   |
| <b>seq1653</b> | Firmicutes    | Clostridia   | 0                   | 0                    | 0                  | 0                   |
| <b>seq1736</b> | Firmicutes    | Clostridia   | 0                   | 0                    | 0                  | 0                   |
| <b>seq183</b>  | Firmicutes    | Clostridia   | 303                 | 964                  | 0                  | 0                   |
| <b>seq215</b>  | Firmicutes    | Clostridia   | 76                  | 481                  | 0                  | 0                   |
| <b>seq533</b>  | Firmicutes    | Clostridia   | 0                   | 0                    | 0                  | 0                   |
| <b>seq578</b>  | Firmicutes    | Clostridia   | 0                   | 0                    | 0                  | 0                   |
| <b>seq614</b>  | Firmicutes    | Clostridia   | 0                   | 0                    | 0                  | 0                   |
| <b>seq631</b>  | Firmicutes    | Clostridia   | 0                   | 0                    | 0                  | 0                   |
| <b>seq1095</b> | Firmicutes    | Clostridia   | 0                   | 0                    | 0                  | 0                   |
| <b>seq1227</b> | Firmicutes    | Clostridia   | 0                   | 0                    | 0                  | 0                   |
| <b>seq1575</b> | Firmicutes    | Clostridia   | 0                   | 0                    | 0                  | 0                   |
| <b>seq1738</b> | Firmicutes    | Clostridia   | 0                   | 0                    | 0                  | 0                   |
| <b>seq65</b>   | Firmicutes    | Clostridia   | 1038                | 1307                 | 495                | 648                 |
| <b>seq120</b>  | Firmicutes    | Clostridia   | 1578                | 436                  | 0                  | 0                   |
| <b>seq143</b>  | Firmicutes    | Clostridia   | 0                   | 0                    | 324                | 395                 |
| <b>seq149</b>  | Firmicutes    | Clostridia   | 0                   | 0                    | 0                  | 0                   |
| <b>seq176</b>  | Firmicutes    | Clostridia   | 802                 | 44                   | 0                  | 0                   |
| <b>seq354</b>  | Firmicutes    | Clostridia   | 0                   | 0                    | 0                  | 0                   |
| <b>seq377</b>  | Firmicutes    | Clostridia   | 116                 | 0                    | 0                  | 0                   |
| <b>seq592</b>  | Firmicutes    | Clostridia   | 0                   | 0                    | 0                  | 0                   |
| <b>seq648</b>  | Firmicutes    | Clostridia   | 0                   | 0                    | 0                  | 0                   |
| <b>seq687</b>  | Firmicutes    | Clostridia   | 0                   | 0                    | 0                  | 0                   |
| <b>seq1257</b> | Firmicutes    | Clostridia   | 0                   | 0                    | 0                  | 0                   |
| <b>seq1317</b> | Firmicutes    | Clostridia   | 0                   | 0                    | 0                  | 0                   |
| <b>seq144</b>  | Firmicutes    | Clostridia   | 321                 | 289                  | 134                | 141                 |
| <b>seq423</b>  | Firmicutes    | Clostridia   | 0                   | 41                   | 0                  | 0                   |
| <b>seq104</b>  | Firmicutes    | Clostridia   | 560                 | 992                  | 59                 | 83                  |
| <b>seq312</b>  | Firmicutes    | Clostridia   | 0                   | 0                    | 0                  | 0                   |
| <b>seq136</b>  | Firmicutes    | Clostridia   | 276                 | 147                  | 21                 | 28                  |

Sequence Count Table

|                | <b>Phylum</b> | <b>Class</b> | <b>Subject2WK0</b> | <b>Subject2WK12</b> | <b>Subject3WK0</b> | <b>Subject3WK12</b> |
|----------------|---------------|--------------|--------------------|---------------------|--------------------|---------------------|
| <b>seq1422</b> | Firmicutes    | Clostridia   | 0                  | 0                   | 0                  | 0                   |
| <b>seq1550</b> | Firmicutes    | Clostridia   | 0                  | 0                   | 0                  | 0                   |
| <b>seq1597</b> | Firmicutes    | Clostridia   | 0                  | 0                   | 0                  | 0                   |
| <b>seq1653</b> | Firmicutes    | Clostridia   | 0                  | 0                   | 0                  | 0                   |
| <b>seq1736</b> | Firmicutes    | Clostridia   | 0                  | 0                   | 0                  | 0                   |
| <b>seq183</b>  | Firmicutes    | Clostridia   | 0                  | 0                   | 0                  | 0                   |
| <b>seq215</b>  | Firmicutes    | Clostridia   | 405                | 382                 | 0                  | 0                   |
| <b>seq533</b>  | Firmicutes    | Clostridia   | 0                  | 0                   | 0                  | 0                   |
| <b>seq578</b>  | Firmicutes    | Clostridia   | 0                  | 0                   | 0                  | 0                   |
| <b>seq614</b>  | Firmicutes    | Clostridia   | 0                  | 0                   | 0                  | 0                   |
| <b>seq631</b>  | Firmicutes    | Clostridia   | 0                  | 0                   | 0                  | 0                   |
| <b>seq1095</b> | Firmicutes    | Clostridia   | 0                  | 0                   | 0                  | 0                   |
| <b>seq1227</b> | Firmicutes    | Clostridia   | 0                  | 0                   | 0                  | 0                   |
| <b>seq1575</b> | Firmicutes    | Clostridia   | 0                  | 0                   | 0                  | 0                   |
| <b>seq1738</b> | Firmicutes    | Clostridia   | 0                  | 0                   | 0                  | 0                   |
| <b>seq65</b>   | Firmicutes    | Clostridia   | 0                  | 0                   | 0                  | 0                   |
| <b>seq120</b>  | Firmicutes    | Clostridia   | 0                  | 0                   | 0                  | 0                   |
| <b>seq143</b>  | Firmicutes    | Clostridia   | 298                | 952                 | 0                  | 0                   |
| <b>seq149</b>  | Firmicutes    | Clostridia   | 0                  | 0                   | 0                  | 0                   |
| <b>seq176</b>  | Firmicutes    | Clostridia   | 0                  | 0                   | 0                  | 0                   |
| <b>seq354</b>  | Firmicutes    | Clostridia   | 0                  | 0                   | 0                  | 0                   |
| <b>seq377</b>  | Firmicutes    | Clostridia   | 0                  | 0                   | 0                  | 0                   |
| <b>seq592</b>  | Firmicutes    | Clostridia   | 0                  | 0                   | 0                  | 0                   |
| <b>seq648</b>  | Firmicutes    | Clostridia   | 0                  | 0                   | 0                  | 0                   |
| <b>seq687</b>  | Firmicutes    | Clostridia   | 0                  | 0                   | 0                  | 0                   |
| <b>seq1257</b> | Firmicutes    | Clostridia   | 0                  | 0                   | 0                  | 0                   |
| <b>seq1317</b> | Firmicutes    | Clostridia   | 0                  | 0                   | 0                  | 0                   |
| <b>seq144</b>  | Firmicutes    | Clostridia   | 0                  | 0                   | 0                  | 0                   |
| <b>seq423</b>  | Firmicutes    | Clostridia   | 0                  | 0                   | 0                  | 0                   |
| <b>seq104</b>  | Firmicutes    | Clostridia   | 0                  | 0                   | 1008               | 229                 |
| <b>seq312</b>  | Firmicutes    | Clostridia   | 184                | 350                 | 0                  | 0                   |
| <b>seq136</b>  | Firmicutes    | Clostridia   | 0                  | 0                   | 0                  | 0                   |

Sequence Count Table

|                | <b>Phylum</b> | <b>Class</b> | <b>Subject4WK0</b> | <b>Subject4WK12</b> | <b>Subject5WK0</b> | <b>Subject5WK12</b> |
|----------------|---------------|--------------|--------------------|---------------------|--------------------|---------------------|
| <b>seq1422</b> | Firmicutes    | Clostridia   | 0                  | 0                   | 0                  | 0                   |
| <b>seq1550</b> | Firmicutes    | Clostridia   | 0                  | 0                   | 0                  | 0                   |
| <b>seq1597</b> | Firmicutes    | Clostridia   | 0                  | 0                   | 0                  | 0                   |
| <b>seq1653</b> | Firmicutes    | Clostridia   | 0                  | 0                   | 0                  | 0                   |
| <b>seq1736</b> | Firmicutes    | Clostridia   | 0                  | 0                   | 0                  | 0                   |
| <b>seq183</b>  | Firmicutes    | Clostridia   | 489                | 465                 | 0                  | 0                   |
| <b>seq215</b>  | Firmicutes    | Clostridia   | 0                  | 0                   | 0                  | 0                   |
| <b>seq533</b>  | Firmicutes    | Clostridia   | 333                | 345                 | 0                  | 0                   |
| <b>seq578</b>  | Firmicutes    | Clostridia   | 0                  | 0                   | 0                  | 0                   |
| <b>seq614</b>  | Firmicutes    | Clostridia   | 0                  | 0                   | 0                  | 0                   |
| <b>seq631</b>  | Firmicutes    | Clostridia   | 0                  | 0                   | 0                  | 0                   |
| <b>seq1095</b> | Firmicutes    | Clostridia   | 0                  | 0                   | 0                  | 0                   |
| <b>seq1227</b> | Firmicutes    | Clostridia   | 0                  | 0                   | 0                  | 0                   |
| <b>seq1575</b> | Firmicutes    | Clostridia   | 0                  | 0                   | 0                  | 0                   |
| <b>seq1738</b> | Firmicutes    | Clostridia   | 0                  | 0                   | 0                  | 0                   |
| <b>seq65</b>   | Firmicutes    | Clostridia   | 792                | 1607                | 688                | 528                 |
| <b>seq120</b>  | Firmicutes    | Clostridia   | 0                  | 0                   | 0                  | 0                   |
| <b>seq143</b>  | Firmicutes    | Clostridia   | 734                | 622                 | 182                | 808                 |
| <b>seq149</b>  | Firmicutes    | Clostridia   | 0                  | 0                   | 0                  | 0                   |
| <b>seq176</b>  | Firmicutes    | Clostridia   | 0                  | 0                   | 0                  | 0                   |
| <b>seq354</b>  | Firmicutes    | Clostridia   | 0                  | 0                   | 0                  | 0                   |
| <b>seq377</b>  | Firmicutes    | Clostridia   | 0                  | 0                   | 0                  | 0                   |
| <b>seq592</b>  | Firmicutes    | Clostridia   | 73                 | 135                 | 0                  | 0                   |
| <b>seq648</b>  | Firmicutes    | Clostridia   | 0                  | 0                   | 0                  | 0                   |
| <b>seq687</b>  | Firmicutes    | Clostridia   | 0                  | 0                   | 212                | 185                 |
| <b>seq1257</b> | Firmicutes    | Clostridia   | 0                  | 0                   | 0                  | 0                   |
| <b>seq1317</b> | Firmicutes    | Clostridia   | 0                  | 0                   | 0                  | 0                   |
| <b>seq144</b>  | Firmicutes    | Clostridia   | 144                | 385                 | 46                 | 35                  |
| <b>seq423</b>  | Firmicutes    | Clostridia   | 35                 | 42                  | 0                  | 0                   |
| <b>seq104</b>  | Firmicutes    | Clostridia   | 359                | 277                 | 285                | 617                 |
| <b>seq312</b>  | Firmicutes    | Clostridia   | 0                  | 0                   | 0                  | 0                   |
| <b>seq136</b>  | Firmicutes    | Clostridia   | 59                 | 9                   | 0                  | 0                   |

Sequence Count Table

|                | <b>Phylum</b> | <b>Class</b> | <b>Subject6WK0</b> | <b>Subject6WK12</b> | <b>Subject18WK0</b> | <b>Subject18WK12</b> |
|----------------|---------------|--------------|--------------------|---------------------|---------------------|----------------------|
| <b>seq1422</b> | Firmicutes    | Clostridia   | 0                  | 0                   | 0                   | 0                    |
| <b>seq1550</b> | Firmicutes    | Clostridia   | 0                  | 0                   | 0                   | 0                    |
| <b>seq1597</b> | Firmicutes    | Clostridia   | 0                  | 0                   | 0                   | 0                    |
| <b>seq1653</b> | Firmicutes    | Clostridia   | 0                  | 0                   | 0                   | 0                    |
| <b>seq1736</b> | Firmicutes    | Clostridia   | 0                  | 0                   | 0                   | 0                    |
| <b>seq183</b>  | Firmicutes    | Clostridia   | 456                | 320                 | 0                   | 0                    |
| <b>seq215</b>  | Firmicutes    | Clostridia   | 75                 | 58                  | 0                   | 0                    |
| <b>seq533</b>  | Firmicutes    | Clostridia   | 0                  | 0                   | 0                   | 0                    |
| <b>seq578</b>  | Firmicutes    | Clostridia   | 0                  | 0                   | 0                   | 0                    |
| <b>seq614</b>  | Firmicutes    | Clostridia   | 0                  | 0                   | 0                   | 0                    |
| <b>seq631</b>  | Firmicutes    | Clostridia   | 0                  | 0                   | 0                   | 0                    |
| <b>seq1095</b> | Firmicutes    | Clostridia   | 51                 | 56                  | 0                   | 0                    |
| <b>seq1227</b> | Firmicutes    | Clostridia   | 0                  | 0                   | 0                   | 0                    |
| <b>seq1575</b> | Firmicutes    | Clostridia   | 0                  | 0                   | 0                   | 0                    |
| <b>seq1738</b> | Firmicutes    | Clostridia   | 0                  | 0                   | 0                   | 0                    |
| <b>seq65</b>   | Firmicutes    | Clostridia   | 1220               | 1302                | 0                   | 0                    |
| <b>seq120</b>  | Firmicutes    | Clostridia   | 140                | 275                 | 0                   | 0                    |
| <b>seq143</b>  | Firmicutes    | Clostridia   | 0                  | 90                  | 0                   | 0                    |
| <b>seq149</b>  | Firmicutes    | Clostridia   | 575                | 944                 | 0                   | 0                    |
| <b>seq176</b>  | Firmicutes    | Clostridia   | 188                | 347                 | 0                   | 0                    |
| <b>seq354</b>  | Firmicutes    | Clostridia   | 0                  | 0                   | 0                   | 0                    |
| <b>seq377</b>  | Firmicutes    | Clostridia   | 0                  | 0                   | 0                   | 0                    |
| <b>seq592</b>  | Firmicutes    | Clostridia   | 0                  | 0                   | 0                   | 0                    |
| <b>seq648</b>  | Firmicutes    | Clostridia   | 0                  | 0                   | 0                   | 0                    |
| <b>seq687</b>  | Firmicutes    | Clostridia   | 0                  | 0                   | 0                   | 0                    |
| <b>seq1257</b> | Firmicutes    | Clostridia   | 0                  | 0                   | 0                   | 0                    |
| <b>seq1317</b> | Firmicutes    | Clostridia   | 0                  | 0                   | 0                   | 0                    |
| <b>seq144</b>  | Firmicutes    | Clostridia   | 296                | 503                 | 0                   | 0                    |
| <b>seq423</b>  | Firmicutes    | Clostridia   | 14                 | 11                  | 0                   | 0                    |
| <b>seq104</b>  | Firmicutes    | Clostridia   | 0                  | 0                   | 234                 | 132                  |
| <b>seq312</b>  | Firmicutes    | Clostridia   | 0                  | 0                   | 0                   | 0                    |
| <b>seq136</b>  | Firmicutes    | Clostridia   | 279                | 530                 | 87                  | 7                    |



Sequence Count Table

|                | <b>Phylum</b> | <b>Class</b> | <b>Subject19WK0</b> | <b>Subject19WK12</b> | <b>Subject20WK0</b> | <b>Subject20WK12</b> |
|----------------|---------------|--------------|---------------------|----------------------|---------------------|----------------------|
| <b>seq1422</b> | Firmicutes    | Clostridia   | 0                   | 0                    | 0                   | 0                    |
| <b>seq1550</b> | Firmicutes    | Clostridia   | 0                   | 0                    | 0                   | 0                    |
| <b>seq1597</b> | Firmicutes    | Clostridia   | 0                   | 0                    | 0                   | 0                    |
| <b>seq1653</b> | Firmicutes    | Clostridia   | 0                   | 0                    | 0                   | 0                    |
| <b>seq1736</b> | Firmicutes    | Clostridia   | 0                   | 0                    | 0                   | 0                    |
| <b>seq183</b>  | Firmicutes    | Clostridia   | 0                   | 0                    | 0                   | 0                    |
| <b>seq215</b>  | Firmicutes    | Clostridia   | 0                   | 0                    | 0                   | 114                  |
| <b>seq533</b>  | Firmicutes    | Clostridia   | 0                   | 0                    | 0                   | 0                    |
| <b>seq578</b>  | Firmicutes    | Clostridia   | 0                   | 0                    | 192                 | 172                  |
| <b>seq614</b>  | Firmicutes    | Clostridia   | 0                   | 0                    | 392                 | 114                  |
| <b>seq631</b>  | Firmicutes    | Clostridia   | 0                   | 0                    | 31                  | 36                   |
| <b>seq1095</b> | Firmicutes    | Clostridia   | 0                   | 0                    | 0                   | 0                    |
| <b>seq1227</b> | Firmicutes    | Clostridia   | 0                   | 0                    | 46                  | 26                   |
| <b>seq1575</b> | Firmicutes    | Clostridia   | 0                   | 0                    | 0                   | 0                    |
| <b>seq1738</b> | Firmicutes    | Clostridia   | 0                   | 0                    | 0                   | 0                    |
| <b>seq65</b>   | Firmicutes    | Clostridia   | 0                   | 0                    | 508                 | 969                  |
| <b>seq120</b>  | Firmicutes    | Clostridia   | 0                   | 0                    | 0                   | 0                    |
| <b>seq143</b>  | Firmicutes    | Clostridia   | 44                  | 59                   | 0                   | 48                   |
| <b>seq149</b>  | Firmicutes    | Clostridia   | 0                   | 0                    | 1619                | 1262                 |
| <b>seq176</b>  | Firmicutes    | Clostridia   | 0                   | 0                    | 279                 | 159                  |
| <b>seq354</b>  | Firmicutes    | Clostridia   | 0                   | 0                    | 46                  | 130                  |
| <b>seq377</b>  | Firmicutes    | Clostridia   | 0                   | 0                    | 109                 | 209                  |
| <b>seq592</b>  | Firmicutes    | Clostridia   | 0                   | 0                    | 0                   | 0                    |
| <b>seq648</b>  | Firmicutes    | Clostridia   | 0                   | 0                    | 0                   | 0                    |
| <b>seq687</b>  | Firmicutes    | Clostridia   | 0                   | 0                    | 0                   | 0                    |
| <b>seq1257</b> | Firmicutes    | Clostridia   | 0                   | 0                    | 0                   | 0                    |
| <b>seq1317</b> | Firmicutes    | Clostridia   | 0                   | 0                    | 0                   | 0                    |
| <b>seq144</b>  | Firmicutes    | Clostridia   | 0                   | 0                    | 512                 | 305                  |
| <b>seq423</b>  | Firmicutes    | Clostridia   | 0                   | 0                    | 17                  | 33                   |
| <b>seq104</b>  | Firmicutes    | Clostridia   | 348                 | 680                  | 0                   | 0                    |
| <b>seq312</b>  | Firmicutes    | Clostridia   | 0                   | 0                    | 0                   | 0                    |
| <b>seq136</b>  | Firmicutes    | Clostridia   | 0                   | 0                    | 305                 | 143                  |

Sequence Count Table

|                | <b>Phylum</b> | <b>Class</b> | <b>Subject7WK0</b> | <b>Subject7WK12</b> | <b>Subject21WK0</b> | <b>Subject21WK12</b> |
|----------------|---------------|--------------|--------------------|---------------------|---------------------|----------------------|
| <b>seq1422</b> | Firmicutes    | Clostridia   | 0                  | 0                   | 0                   | 0                    |
| <b>seq1550</b> | Firmicutes    | Clostridia   | 0                  | 0                   | 0                   | 0                    |
| <b>seq1597</b> | Firmicutes    | Clostridia   | 0                  | 0                   | 0                   | 0                    |
| <b>seq1653</b> | Firmicutes    | Clostridia   | 0                  | 0                   | 0                   | 0                    |
| <b>seq1736</b> | Firmicutes    | Clostridia   | 0                  | 0                   | 0                   | 0                    |
| <b>seq183</b>  | Firmicutes    | Clostridia   | 0                  | 0                   | 0                   | 0                    |
| <b>seq215</b>  | Firmicutes    | Clostridia   | 0                  | 0                   | 0                   | 0                    |
| <b>seq533</b>  | Firmicutes    | Clostridia   | 0                  | 0                   | 0                   | 0                    |
| <b>seq578</b>  | Firmicutes    | Clostridia   | 0                  | 0                   | 0                   | 0                    |
| <b>seq614</b>  | Firmicutes    | Clostridia   | 0                  | 0                   | 0                   | 0                    |
| <b>seq631</b>  | Firmicutes    | Clostridia   | 0                  | 0                   | 0                   | 0                    |
| <b>seq1095</b> | Firmicutes    | Clostridia   | 0                  | 0                   | 0                   | 0                    |
| <b>seq1227</b> | Firmicutes    | Clostridia   | 0                  | 0                   | 0                   | 0                    |
| <b>seq1575</b> | Firmicutes    | Clostridia   | 0                  | 0                   | 0                   | 0                    |
| <b>seq1738</b> | Firmicutes    | Clostridia   | 0                  | 0                   | 0                   | 0                    |
| <b>seq65</b>   | Firmicutes    | Clostridia   | 0                  | 0                   | 0                   | 0                    |
| <b>seq120</b>  | Firmicutes    | Clostridia   | 0                  | 0                   | 0                   | 0                    |
| <b>seq143</b>  | Firmicutes    | Clostridia   | 0                  | 0                   | 0                   | 0                    |
| <b>seq149</b>  | Firmicutes    | Clostridia   | 0                  | 0                   | 0                   | 0                    |
| <b>seq176</b>  | Firmicutes    | Clostridia   | 0                  | 0                   | 0                   | 0                    |
| <b>seq354</b>  | Firmicutes    | Clostridia   | 0                  | 0                   | 0                   | 0                    |
| <b>seq377</b>  | Firmicutes    | Clostridia   | 539                | 165                 | 0                   | 0                    |
| <b>seq592</b>  | Firmicutes    | Clostridia   | 0                  | 0                   | 0                   | 0                    |
| <b>seq648</b>  | Firmicutes    | Clostridia   | 0                  | 0                   | 0                   | 0                    |
| <b>seq687</b>  | Firmicutes    | Clostridia   | 0                  | 0                   | 0                   | 0                    |
| <b>seq1257</b> | Firmicutes    | Clostridia   | 0                  | 0                   | 0                   | 0                    |
| <b>seq1317</b> | Firmicutes    | Clostridia   | 0                  | 0                   | 0                   | 0                    |
| <b>seq144</b>  | Firmicutes    | Clostridia   | 0                  | 0                   | 0                   | 0                    |
| <b>seq423</b>  | Firmicutes    | Clostridia   | 0                  | 0                   | 0                   | 0                    |
| <b>seq104</b>  | Firmicutes    | Clostridia   | 352                | 227                 | 297                 | 646                  |
| <b>seq312</b>  | Firmicutes    | Clostridia   | 0                  | 0                   | 0                   | 0                    |
| <b>seq136</b>  | Firmicutes    | Clostridia   | 0                  | 0                   | 0                   | 0                    |

Sequence Count Table

|                | <b>Phylum</b> | <b>Class</b> | <b>Subject8WK0</b> | <b>Subject8WK12</b> | <b>Subject9WK0</b> | <b>Subject9WK12</b> |
|----------------|---------------|--------------|--------------------|---------------------|--------------------|---------------------|
| <b>seq1422</b> | Firmicutes    | Clostridia   | 0                  | 0                   | 0                  | 0                   |
| <b>seq1550</b> | Firmicutes    | Clostridia   | 0                  | 0                   | 0                  | 0                   |
| <b>seq1597</b> | Firmicutes    | Clostridia   | 0                  | 0                   | 0                  | 0                   |
| <b>seq1653</b> | Firmicutes    | Clostridia   | 0                  | 0                   | 0                  | 0                   |
| <b>seq1736</b> | Firmicutes    | Clostridia   | 0                  | 0                   | 0                  | 0                   |
| <b>seq183</b>  | Firmicutes    | Clostridia   | 0                  | 0                   | 0                  | 0                   |
| <b>seq215</b>  | Firmicutes    | Clostridia   | 0                  | 0                   | 0                  | 0                   |
| <b>seq533</b>  | Firmicutes    | Clostridia   | 0                  | 0                   | 0                  | 0                   |
| <b>seq578</b>  | Firmicutes    | Clostridia   | 0                  | 0                   | 0                  | 0                   |
| <b>seq614</b>  | Firmicutes    | Clostridia   | 0                  | 0                   | 0                  | 0                   |
| <b>seq631</b>  | Firmicutes    | Clostridia   | 0                  | 0                   | 0                  | 0                   |
| <b>seq1095</b> | Firmicutes    | Clostridia   | 0                  | 0                   | 0                  | 0                   |
| <b>seq1227</b> | Firmicutes    | Clostridia   | 0                  | 0                   | 0                  | 0                   |
| <b>seq1575</b> | Firmicutes    | Clostridia   | 0                  | 0                   | 0                  | 0                   |
| <b>seq1738</b> | Firmicutes    | Clostridia   | 0                  | 0                   | 0                  | 0                   |
| <b>seq65</b>   | Firmicutes    | Clostridia   | 918                | 567                 | 0                  | 0                   |
| <b>seq120</b>  | Firmicutes    | Clostridia   | 0                  | 0                   | 319                | 0                   |
| <b>seq143</b>  | Firmicutes    | Clostridia   | 481                | 259                 | 114                | 0                   |
| <b>seq149</b>  | Firmicutes    | Clostridia   | 0                  | 0                   | 0                  | 0                   |
| <b>seq176</b>  | Firmicutes    | Clostridia   | 104                | 57                  | 0                  | 0                   |
| <b>seq354</b>  | Firmicutes    | Clostridia   | 0                  | 0                   | 0                  | 0                   |
| <b>seq377</b>  | Firmicutes    | Clostridia   | 0                  | 0                   | 0                  | 0                   |
| <b>seq592</b>  | Firmicutes    | Clostridia   | 0                  | 0                   | 0                  | 0                   |
| <b>seq648</b>  | Firmicutes    | Clostridia   | 0                  | 0                   | 0                  | 0                   |
| <b>seq687</b>  | Firmicutes    | Clostridia   | 0                  | 0                   | 0                  | 0                   |
| <b>seq1257</b> | Firmicutes    | Clostridia   | 0                  | 0                   | 0                  | 0                   |
| <b>seq1317</b> | Firmicutes    | Clostridia   | 0                  | 0                   | 0                  | 0                   |
| <b>seq144</b>  | Firmicutes    | Clostridia   | 269                | 174                 | 0                  | 0                   |
| <b>seq423</b>  | Firmicutes    | Clostridia   | 78                 | 96                  | 0                  | 0                   |
| <b>seq104</b>  | Firmicutes    | Clostridia   | 233                | 385                 | 249                | 52                  |
| <b>seq312</b>  | Firmicutes    | Clostridia   | 0                  | 0                   | 0                  | 0                   |
| <b>seq136</b>  | Firmicutes    | Clostridia   | 0                  | 0                   | 0                  | 0                   |

Sequence Count Table

|                | <b>Phylum</b> | <b>Class</b> | <b>Subject10WK0</b> | <b>Subject10WK12</b> | <b>Subject22WK0</b> | <b>Subject22WK12</b> |
|----------------|---------------|--------------|---------------------|----------------------|---------------------|----------------------|
| <b>seq1422</b> | Firmicutes    | Clostridia   | 0                   | 0                    | 0                   | 0                    |
| <b>seq1550</b> | Firmicutes    | Clostridia   | 0                   | 0                    | 0                   | 24                   |
| <b>seq1597</b> | Firmicutes    | Clostridia   | 0                   | 0                    | 0                   | 0                    |
| <b>seq1653</b> | Firmicutes    | Clostridia   | 0                   | 0                    | 0                   | 0                    |
| <b>seq1736</b> | Firmicutes    | Clostridia   | 0                   | 0                    | 0                   | 0                    |
| <b>seq183</b>  | Firmicutes    | Clostridia   | 20                  | 29                   | 0                   | 0                    |
| <b>seq215</b>  | Firmicutes    | Clostridia   | 0                   | 0                    | 150                 | 93                   |
| <b>seq533</b>  | Firmicutes    | Clostridia   | 0                   | 0                    | 0                   | 0                    |
| <b>seq578</b>  | Firmicutes    | Clostridia   | 0                   | 0                    | 130                 | 90                   |
| <b>seq614</b>  | Firmicutes    | Clostridia   | 0                   | 0                    | 0                   | 0                    |
| <b>seq631</b>  | Firmicutes    | Clostridia   | 0                   | 0                    | 251                 | 153                  |
| <b>seq1095</b> | Firmicutes    | Clostridia   | 0                   | 0                    | 0                   | 0                    |
| <b>seq1227</b> | Firmicutes    | Clostridia   | 0                   | 0                    | 0                   | 0                    |
| <b>seq1575</b> | Firmicutes    | Clostridia   | 0                   | 0                    | 0                   | 0                    |
| <b>seq1738</b> | Firmicutes    | Clostridia   | 0                   | 0                    | 0                   | 0                    |
| <b>seq65</b>   | Firmicutes    | Clostridia   | 0                   | 0                    | 690                 | 481                  |
| <b>seq120</b>  | Firmicutes    | Clostridia   | 0                   | 0                    | 236                 | 527                  |
| <b>seq143</b>  | Firmicutes    | Clostridia   | 151                 | 27                   | 0                   | 0                    |
| <b>seq149</b>  | Firmicutes    | Clostridia   | 0                   | 0                    | 848                 | 607                  |
| <b>seq176</b>  | Firmicutes    | Clostridia   | 0                   | 0                    | 1348                | 539                  |
| <b>seq354</b>  | Firmicutes    | Clostridia   | 0                   | 0                    | 0                   | 0                    |
| <b>seq377</b>  | Firmicutes    | Clostridia   | 0                   | 0                    | 162                 | 35                   |
| <b>seq592</b>  | Firmicutes    | Clostridia   | 0                   | 0                    | 0                   | 0                    |
| <b>seq648</b>  | Firmicutes    | Clostridia   | 0                   | 0                    | 0                   | 0                    |
| <b>seq687</b>  | Firmicutes    | Clostridia   | 0                   | 0                    | 0                   | 0                    |
| <b>seq1257</b> | Firmicutes    | Clostridia   | 0                   | 0                    | 0                   | 0                    |
| <b>seq1317</b> | Firmicutes    | Clostridia   | 0                   | 0                    | 0                   | 0                    |
| <b>seq144</b>  | Firmicutes    | Clostridia   | 0                   | 0                    | 216                 | 79                   |
| <b>seq423</b>  | Firmicutes    | Clostridia   | 231                 | 139                  | 0                   | 16                   |
| <b>seq104</b>  | Firmicutes    | Clostridia   | 266                 | 64                   | 111                 | 47                   |
| <b>seq312</b>  | Firmicutes    | Clostridia   | 0                   | 0                    | 533                 | 296                  |
| <b>seq136</b>  | Firmicutes    | Clostridia   | 0                   | 0                    | 1677                | 1715                 |

Sequence Count Table

|                | <b>Phylum</b> | <b>Class</b> | <b>Subject23WK0</b> | <b>Subject23WK12</b> | <b>Subject24WK0</b> | <b>Subject24WK12</b> |
|----------------|---------------|--------------|---------------------|----------------------|---------------------|----------------------|
| <b>seq1422</b> | Firmicutes    | Clostridia   | 0                   | 0                    | 0                   | 0                    |
| <b>seq1550</b> | Firmicutes    | Clostridia   | 0                   | 0                    | 0                   | 0                    |
| <b>seq1597</b> | Firmicutes    | Clostridia   | 0                   | 0                    | 0                   | 0                    |
| <b>seq1653</b> | Firmicutes    | Clostridia   | 0                   | 0                    | 0                   | 0                    |
| <b>seq1736</b> | Firmicutes    | Clostridia   | 0                   | 0                    | 0                   | 0                    |
| <b>seq183</b>  | Firmicutes    | Clostridia   | 193                 | 146                  | 385                 | 231                  |
| <b>seq215</b>  | Firmicutes    | Clostridia   | 486                 | 810                  | 0                   | 62                   |
| <b>seq533</b>  | Firmicutes    | Clostridia   | 0                   | 0                    | 0                   | 0                    |
| <b>seq578</b>  | Firmicutes    | Clostridia   | 0                   | 0                    | 0                   | 0                    |
| <b>seq614</b>  | Firmicutes    | Clostridia   | 0                   | 0                    | 0                   | 0                    |
| <b>seq631</b>  | Firmicutes    | Clostridia   | 0                   | 0                    | 0                   | 0                    |
| <b>seq1095</b> | Firmicutes    | Clostridia   | 0                   | 0                    | 0                   | 0                    |
| <b>seq1227</b> | Firmicutes    | Clostridia   | 0                   | 0                    | 0                   | 0                    |
| <b>seq1575</b> | Firmicutes    | Clostridia   | 0                   | 0                    | 0                   | 0                    |
| <b>seq1738</b> | Firmicutes    | Clostridia   | 0                   | 0                    | 0                   | 0                    |
| <b>seq65</b>   | Firmicutes    | Clostridia   | 379                 | 789                  | 1123                | 1097                 |
| <b>seq120</b>  | Firmicutes    | Clostridia   | 329                 | 912                  | 464                 | 584                  |
| <b>seq143</b>  | Firmicutes    | Clostridia   | 0                   | 0                    | 0                   | 0                    |
| <b>seq149</b>  | Firmicutes    | Clostridia   | 0                   | 24                   | 91                  | 182                  |
| <b>seq176</b>  | Firmicutes    | Clostridia   | 157                 | 481                  | 88                  | 207                  |
| <b>seq354</b>  | Firmicutes    | Clostridia   | 0                   | 0                    | 0                   | 0                    |
| <b>seq377</b>  | Firmicutes    | Clostridia   | 0                   | 38                   | 0                   | 0                    |
| <b>seq592</b>  | Firmicutes    | Clostridia   | 0                   | 0                    | 0                   | 0                    |
| <b>seq648</b>  | Firmicutes    | Clostridia   | 0                   | 0                    | 0                   | 0                    |
| <b>seq687</b>  | Firmicutes    | Clostridia   | 0                   | 0                    | 0                   | 0                    |
| <b>seq1257</b> | Firmicutes    | Clostridia   | 0                   | 0                    | 0                   | 66                   |
| <b>seq1317</b> | Firmicutes    | Clostridia   | 0                   | 0                    | 0                   | 0                    |
| <b>seq144</b>  | Firmicutes    | Clostridia   | 452                 | 487                  | 258                 | 294                  |
| <b>seq423</b>  | Firmicutes    | Clostridia   | 0                   | 0                    | 46                  | 59                   |
| <b>seq104</b>  | Firmicutes    | Clostridia   | 0                   | 0                    | 350                 | 0                    |
| <b>seq312</b>  | Firmicutes    | Clostridia   | 88                  | 248                  | 0                   | 0                    |
| <b>seq136</b>  | Firmicutes    | Clostridia   | 224                 | 783                  | 180                 | 157                  |

Sequence Count Table

|                | <b>Phylum</b> | <b>Class</b> | <b>Subject11WK0</b> | <b>Subject11WK12</b> | <b>Subject12WK0</b> | <b>Subject12WK12</b> |
|----------------|---------------|--------------|---------------------|----------------------|---------------------|----------------------|
| <b>seq1422</b> | Firmicutes    | Clostridia   | 0                   | 0                    | 0                   | 0                    |
| <b>seq1550</b> | Firmicutes    | Clostridia   | 0                   | 0                    | 0                   | 0                    |
| <b>seq1597</b> | Firmicutes    | Clostridia   | 0                   | 0                    | 0                   | 0                    |
| <b>seq1653</b> | Firmicutes    | Clostridia   | 0                   | 0                    | 0                   | 0                    |
| <b>seq1736</b> | Firmicutes    | Clostridia   | 0                   | 0                    | 0                   | 0                    |
| <b>seq183</b>  | Firmicutes    | Clostridia   | 0                   | 0                    | 0                   | 0                    |
| <b>seq215</b>  | Firmicutes    | Clostridia   | 0                   | 0                    | 133                 | 93                   |
| <b>seq533</b>  | Firmicutes    | Clostridia   | 0                   | 0                    | 0                   | 0                    |
| <b>seq578</b>  | Firmicutes    | Clostridia   | 0                   | 0                    | 0                   | 0                    |
| <b>seq614</b>  | Firmicutes    | Clostridia   | 0                   | 0                    | 0                   | 0                    |
| <b>seq631</b>  | Firmicutes    | Clostridia   | 0                   | 0                    | 0                   | 0                    |
| <b>seq1095</b> | Firmicutes    | Clostridia   | 0                   | 0                    | 0                   | 0                    |
| <b>seq1227</b> | Firmicutes    | Clostridia   | 0                   | 0                    | 0                   | 0                    |
| <b>seq1575</b> | Firmicutes    | Clostridia   | 0                   | 0                    | 0                   | 0                    |
| <b>seq1738</b> | Firmicutes    | Clostridia   | 0                   | 0                    | 0                   | 0                    |
| <b>seq65</b>   | Firmicutes    | Clostridia   | 0                   | 0                    | 465                 | 645                  |
| <b>seq120</b>  | Firmicutes    | Clostridia   | 0                   | 0                    | 0                   | 0                    |
| <b>seq143</b>  | Firmicutes    | Clostridia   | 0                   | 0                    | 38                  | 74                   |
| <b>seq149</b>  | Firmicutes    | Clostridia   | 0                   | 0                    | 0                   | 0                    |
| <b>seq176</b>  | Firmicutes    | Clostridia   | 0                   | 0                    | 9                   | 15                   |
| <b>seq354</b>  | Firmicutes    | Clostridia   | 0                   | 0                    | 195                 | 181                  |
| <b>seq377</b>  | Firmicutes    | Clostridia   | 0                   | 0                    | 0                   | 0                    |
| <b>seq592</b>  | Firmicutes    | Clostridia   | 0                   | 0                    | 67                  | 112                  |
| <b>seq648</b>  | Firmicutes    | Clostridia   | 0                   | 0                    | 0                   | 0                    |
| <b>seq687</b>  | Firmicutes    | Clostridia   | 0                   | 0                    | 0                   | 0                    |
| <b>seq1257</b> | Firmicutes    | Clostridia   | 0                   | 0                    | 0                   | 0                    |
| <b>seq1317</b> | Firmicutes    | Clostridia   | 0                   | 0                    | 0                   | 54                   |
| <b>seq144</b>  | Firmicutes    | Clostridia   | 0                   | 0                    | 192                 | 151                  |
| <b>seq423</b>  | Firmicutes    | Clostridia   | 0                   | 0                    | 31                  | 60                   |
| <b>seq104</b>  | Firmicutes    | Clostridia   | 276                 | 97                   | 106                 | 193                  |
| <b>seq312</b>  | Firmicutes    | Clostridia   | 0                   | 0                    | 0                   | 0                    |
| <b>seq136</b>  | Firmicutes    | Clostridia   | 0                   | 0                    | 0                   | 0                    |

Sequence Count Table

|                | <b>Phylum</b> | <b>Class</b> | <b>Subject25WK0</b> | <b>Subject25WK12</b> | <b>Subject38WK0</b> | <b>Subject38WK12</b> |
|----------------|---------------|--------------|---------------------|----------------------|---------------------|----------------------|
| <b>seq1422</b> | Firmicutes    | Clostridia   | 0                   | 0                    | 0                   | 0                    |
| <b>seq1550</b> | Firmicutes    | Clostridia   | 0                   | 0                    | 0                   | 0                    |
| <b>seq1597</b> | Firmicutes    | Clostridia   | 20                  | 0                    | 0                   | 0                    |
| <b>seq1653</b> | Firmicutes    | Clostridia   | 0                   | 0                    | 0                   | 0                    |
| <b>seq1736</b> | Firmicutes    | Clostridia   | 0                   | 0                    | 0                   | 0                    |
| <b>seq183</b>  | Firmicutes    | Clostridia   | 279                 | 246                  | 0                   | 0                    |
| <b>seq215</b>  | Firmicutes    | Clostridia   | 0                   | 0                    | 0                   | 0                    |
| <b>seq533</b>  | Firmicutes    | Clostridia   | 0                   | 0                    | 0                   | 0                    |
| <b>seq578</b>  | Firmicutes    | Clostridia   | 0                   | 0                    | 0                   | 0                    |
| <b>seq614</b>  | Firmicutes    | Clostridia   | 0                   | 0                    | 0                   | 0                    |
| <b>seq631</b>  | Firmicutes    | Clostridia   | 0                   | 0                    | 0                   | 0                    |
| <b>seq1095</b> | Firmicutes    | Clostridia   | 0                   | 0                    | 0                   | 0                    |
| <b>seq1227</b> | Firmicutes    | Clostridia   | 0                   | 0                    | 0                   | 0                    |
| <b>seq1575</b> | Firmicutes    | Clostridia   | 0                   | 0                    | 0                   | 0                    |
| <b>seq1738</b> | Firmicutes    | Clostridia   | 0                   | 0                    | 0                   | 0                    |
| <b>seq65</b>   | Firmicutes    | Clostridia   | 388                 | 103                  | 0                   | 0                    |
| <b>seq120</b>  | Firmicutes    | Clostridia   | 1688                | 822                  | 0                   | 0                    |
| <b>seq143</b>  | Firmicutes    | Clostridia   | 106                 | 273                  | 0                   | 0                    |
| <b>seq149</b>  | Firmicutes    | Clostridia   | 0                   | 0                    | 0                   | 0                    |
| <b>seq176</b>  | Firmicutes    | Clostridia   | 394                 | 15                   | 0                   | 0                    |
| <b>seq354</b>  | Firmicutes    | Clostridia   | 0                   | 0                    | 0                   | 0                    |
| <b>seq377</b>  | Firmicutes    | Clostridia   | 0                   | 0                    | 0                   | 0                    |
| <b>seq592</b>  | Firmicutes    | Clostridia   | 89                  | 65                   | 0                   | 0                    |
| <b>seq648</b>  | Firmicutes    | Clostridia   | 0                   | 0                    | 0                   | 0                    |
| <b>seq687</b>  | Firmicutes    | Clostridia   | 0                   | 0                    | 0                   | 0                    |
| <b>seq1257</b> | Firmicutes    | Clostridia   | 0                   | 0                    | 0                   | 0                    |
| <b>seq1317</b> | Firmicutes    | Clostridia   | 0                   | 0                    | 0                   | 0                    |
| <b>seq144</b>  | Firmicutes    | Clostridia   | 231                 | 44                   | 0                   | 0                    |
| <b>seq423</b>  | Firmicutes    | Clostridia   | 0                   | 0                    | 0                   | 0                    |
| <b>seq104</b>  | Firmicutes    | Clostridia   | 0                   | 0                    | 0                   | 0                    |
| <b>seq312</b>  | Firmicutes    | Clostridia   | 375                 | 16                   | 0                   | 0                    |
| <b>seq136</b>  | Firmicutes    | Clostridia   | 677                 | 88                   | 0                   | 0                    |

Sequence Count Table

|                | <b>Phylum</b> | <b>Class</b> | <b>Subject31WK0</b> | <b>Subject31WK12</b> | <b>Subject32WK0</b> | <b>Subject32WK12</b> |
|----------------|---------------|--------------|---------------------|----------------------|---------------------|----------------------|
| <b>seq1422</b> | Firmicutes    | Clostridia   | 0                   | 0                    | 0                   | 0                    |
| <b>seq1550</b> | Firmicutes    | Clostridia   | 0                   | 0                    | 0                   | 0                    |
| <b>seq1597</b> | Firmicutes    | Clostridia   | 0                   | 0                    | 0                   | 0                    |
| <b>seq1653</b> | Firmicutes    | Clostridia   | 0                   | 0                    | 0                   | 0                    |
| <b>seq1736</b> | Firmicutes    | Clostridia   | 0                   | 0                    | 0                   | 0                    |
| <b>seq183</b>  | Firmicutes    | Clostridia   | 0                   | 0                    | 44                  | 0                    |
| <b>seq215</b>  | Firmicutes    | Clostridia   | 0                   | 0                    | 0                   | 0                    |
| <b>seq533</b>  | Firmicutes    | Clostridia   | 0                   | 0                    | 0                   | 0                    |
| <b>seq578</b>  | Firmicutes    | Clostridia   | 0                   | 0                    | 0                   | 0                    |
| <b>seq614</b>  | Firmicutes    | Clostridia   | 0                   | 0                    | 0                   | 0                    |
| <b>seq631</b>  | Firmicutes    | Clostridia   | 0                   | 0                    | 0                   | 0                    |
| <b>seq1095</b> | Firmicutes    | Clostridia   | 0                   | 0                    | 0                   | 0                    |
| <b>seq1227</b> | Firmicutes    | Clostridia   | 0                   | 0                    | 0                   | 0                    |
| <b>seq1575</b> | Firmicutes    | Clostridia   | 0                   | 0                    | 0                   | 0                    |
| <b>seq1738</b> | Firmicutes    | Clostridia   | 0                   | 0                    | 0                   | 0                    |
| <b>seq65</b>   | Firmicutes    | Clostridia   | 0                   | 0                    | 0                   | 0                    |
| <b>seq120</b>  | Firmicutes    | Clostridia   | 0                   | 0                    | 0                   | 0                    |
| <b>seq143</b>  | Firmicutes    | Clostridia   | 0                   | 0                    | 0                   | 0                    |
| <b>seq149</b>  | Firmicutes    | Clostridia   | 0                   | 0                    | 0                   | 0                    |
| <b>seq176</b>  | Firmicutes    | Clostridia   | 0                   | 0                    | 0                   | 0                    |
| <b>seq354</b>  | Firmicutes    | Clostridia   | 0                   | 0                    | 0                   | 0                    |
| <b>seq377</b>  | Firmicutes    | Clostridia   | 0                   | 0                    | 0                   | 0                    |
| <b>seq592</b>  | Firmicutes    | Clostridia   | 0                   | 0                    | 0                   | 0                    |
| <b>seq648</b>  | Firmicutes    | Clostridia   | 0                   | 0                    | 0                   | 0                    |
| <b>seq687</b>  | Firmicutes    | Clostridia   | 0                   | 0                    | 0                   | 0                    |
| <b>seq1257</b> | Firmicutes    | Clostridia   | 0                   | 0                    | 0                   | 0                    |
| <b>seq1317</b> | Firmicutes    | Clostridia   | 0                   | 0                    | 0                   | 0                    |
| <b>seq144</b>  | Firmicutes    | Clostridia   | 0                   | 0                    | 0                   | 0                    |
| <b>seq423</b>  | Firmicutes    | Clostridia   | 0                   | 0                    | 0                   | 0                    |
| <b>seq104</b>  | Firmicutes    | Clostridia   | 0                   | 0                    | 33                  | 0                    |
| <b>seq312</b>  | Firmicutes    | Clostridia   | 0                   | 0                    | 0                   | 0                    |
| <b>seq136</b>  | Firmicutes    | Clostridia   | 0                   | 0                    | 0                   | 0                    |



Sequence Count Table

|                | <b>Phylum</b> | <b>Class</b> | <b>Subject13WK0</b> | <b>Subject13WK12</b> | <b>Subject39WK0</b> | <b>Subject39WK12</b> |
|----------------|---------------|--------------|---------------------|----------------------|---------------------|----------------------|
| <b>seq1422</b> | Firmicutes    | Clostridia   | 0                   | 0                    | 0                   | 0                    |
| <b>seq1550</b> | Firmicutes    | Clostridia   | 0                   | 0                    | 0                   | 0                    |
| <b>seq1597</b> | Firmicutes    | Clostridia   | 0                   | 0                    | 0                   | 0                    |
| <b>seq1653</b> | Firmicutes    | Clostridia   | 0                   | 16                   | 0                   | 0                    |
| <b>seq1736</b> | Firmicutes    | Clostridia   | 11                  | 0                    | 0                   | 0                    |
| <b>seq183</b>  | Firmicutes    | Clostridia   | 0                   | 0                    | 0                   | 0                    |
| <b>seq215</b>  | Firmicutes    | Clostridia   | 0                   | 0                    | 0                   | 233                  |
| <b>seq533</b>  | Firmicutes    | Clostridia   | 0                   | 0                    | 0                   | 0                    |
| <b>seq578</b>  | Firmicutes    | Clostridia   | 0                   | 0                    | 0                   | 0                    |
| <b>seq614</b>  | Firmicutes    | Clostridia   | 0                   | 0                    | 0                   | 0                    |
| <b>seq631</b>  | Firmicutes    | Clostridia   | 0                   | 0                    | 0                   | 0                    |
| <b>seq1095</b> | Firmicutes    | Clostridia   | 0                   | 0                    | 0                   | 0                    |
| <b>seq1227</b> | Firmicutes    | Clostridia   | 0                   | 0                    | 0                   | 0                    |
| <b>seq1575</b> | Firmicutes    | Clostridia   | 0                   | 0                    | 0                   | 0                    |
| <b>seq1738</b> | Firmicutes    | Clostridia   | 0                   | 0                    | 0                   | 0                    |
| <b>seq65</b>   | Firmicutes    | Clostridia   | 0                   | 0                    | 0                   | 0                    |
| <b>seq120</b>  | Firmicutes    | Clostridia   | 0                   | 0                    | 0                   | 0                    |
| <b>seq143</b>  | Firmicutes    | Clostridia   | 0                   | 0                    | 0                   | 69                   |
| <b>seq149</b>  | Firmicutes    | Clostridia   | 791                 | 1029                 | 0                   | 0                    |
| <b>seq176</b>  | Firmicutes    | Clostridia   | 564                 | 496                  | 0                   | 0                    |
| <b>seq354</b>  | Firmicutes    | Clostridia   | 0                   | 0                    | 0                   | 180                  |
| <b>seq377</b>  | Firmicutes    | Clostridia   | 0                   | 0                    | 0                   | 0                    |
| <b>seq592</b>  | Firmicutes    | Clostridia   | 0                   | 0                    | 0                   | 0                    |
| <b>seq648</b>  | Firmicutes    | Clostridia   | 0                   | 0                    | 0                   | 0                    |
| <b>seq687</b>  | Firmicutes    | Clostridia   | 0                   | 0                    | 0                   | 0                    |
| <b>seq1257</b> | Firmicutes    | Clostridia   | 0                   | 0                    | 0                   | 0                    |
| <b>seq1317</b> | Firmicutes    | Clostridia   | 0                   | 0                    | 0                   | 0                    |
| <b>seq144</b>  | Firmicutes    | Clostridia   | 159                 | 67                   | 0                   | 248                  |
| <b>seq423</b>  | Firmicutes    | Clostridia   | 0                   | 0                    | 0                   | 0                    |
| <b>seq104</b>  | Firmicutes    | Clostridia   | 148                 | 157                  | 0                   | 18                   |
| <b>seq312</b>  | Firmicutes    | Clostridia   | 0                   | 0                    | 0                   | 0                    |
| <b>seq136</b>  | Firmicutes    | Clostridia   | 171                 | 1355                 | 0                   | 16                   |

Sequence Count Table

|                | <b>Phylum</b> | <b>Class</b> | <b>Subject26WK0</b> | <b>Subject26WK12</b> | <b>Subject14WK0</b> | <b>Subject14WK12</b> |
|----------------|---------------|--------------|---------------------|----------------------|---------------------|----------------------|
| <b>seq1422</b> | Firmicutes    | Clostridia   | 0                   | 0                    | 0                   | 0                    |
| <b>seq1550</b> | Firmicutes    | Clostridia   | 0                   | 0                    | 0                   | 0                    |
| <b>seq1597</b> | Firmicutes    | Clostridia   | 0                   | 0                    | 0                   | 0                    |
| <b>seq1653</b> | Firmicutes    | Clostridia   | 0                   | 0                    | 0                   | 0                    |
| <b>seq1736</b> | Firmicutes    | Clostridia   | 0                   | 0                    | 0                   | 0                    |
| <b>seq183</b>  | Firmicutes    | Clostridia   | 0                   | 0                    | 94                  | 53                   |
| <b>seq215</b>  | Firmicutes    | Clostridia   | 0                   | 0                    | 47                  | 229                  |
| <b>seq533</b>  | Firmicutes    | Clostridia   | 0                   | 0                    | 0                   | 0                    |
| <b>seq578</b>  | Firmicutes    | Clostridia   | 0                   | 0                    | 0                   | 0                    |
| <b>seq614</b>  | Firmicutes    | Clostridia   | 0                   | 0                    | 0                   | 0                    |
| <b>seq631</b>  | Firmicutes    | Clostridia   | 0                   | 0                    | 0                   | 0                    |
| <b>seq1095</b> | Firmicutes    | Clostridia   | 0                   | 0                    | 0                   | 0                    |
| <b>seq1227</b> | Firmicutes    | Clostridia   | 0                   | 0                    | 0                   | 0                    |
| <b>seq1575</b> | Firmicutes    | Clostridia   | 0                   | 0                    | 0                   | 0                    |
| <b>seq1738</b> | Firmicutes    | Clostridia   | 0                   | 0                    | 0                   | 0                    |
| <b>seq65</b>   | Firmicutes    | Clostridia   | 0                   | 0                    | 549                 | 525                  |
| <b>seq120</b>  | Firmicutes    | Clostridia   | 1975                | 131                  | 554                 | 84                   |
| <b>seq143</b>  | Firmicutes    | Clostridia   | 0                   | 0                    | 0                   | 0                    |
| <b>seq149</b>  | Firmicutes    | Clostridia   | 0                   | 0                    | 57                  | 538                  |
| <b>seq176</b>  | Firmicutes    | Clostridia   | 0                   | 0                    | 105                 | 167                  |
| <b>seq354</b>  | Firmicutes    | Clostridia   | 0                   | 0                    | 0                   | 0                    |
| <b>seq377</b>  | Firmicutes    | Clostridia   | 0                   | 0                    | 0                   | 0                    |
| <b>seq592</b>  | Firmicutes    | Clostridia   | 0                   | 0                    | 0                   | 0                    |
| <b>seq648</b>  | Firmicutes    | Clostridia   | 0                   | 0                    | 0                   | 0                    |
| <b>seq687</b>  | Firmicutes    | Clostridia   | 0                   | 0                    | 0                   | 0                    |
| <b>seq1257</b> | Firmicutes    | Clostridia   | 0                   | 0                    | 0                   | 0                    |
| <b>seq1317</b> | Firmicutes    | Clostridia   | 0                   | 0                    | 0                   | 0                    |
| <b>seq144</b>  | Firmicutes    | Clostridia   | 440                 | 66                   | 232                 | 221                  |
| <b>seq423</b>  | Firmicutes    | Clostridia   | 0                   | 0                    | 46                  | 33                   |
| <b>seq104</b>  | Firmicutes    | Clostridia   | 583                 | 339                  | 219                 | 251                  |
| <b>seq312</b>  | Firmicutes    | Clostridia   | 0                   | 0                    | 0                   | 0                    |
| <b>seq136</b>  | Firmicutes    | Clostridia   | 0                   | 0                    | 437                 | 554                  |

Sequence Count Table

|                | <b>Phylum</b> | <b>Class</b> | <b>Subject27WK0</b> | <b>Subject27WK12</b> | <b>Subject15WK0</b> | <b>Subject15WK12</b> |
|----------------|---------------|--------------|---------------------|----------------------|---------------------|----------------------|
| <b>seq1422</b> | Firmicutes    | Clostridia   | 0                   | 0                    | 0                   | 0                    |
| <b>seq1550</b> | Firmicutes    | Clostridia   | 0                   | 0                    | 0                   | 0                    |
| <b>seq1597</b> | Firmicutes    | Clostridia   | 0                   | 0                    | 0                   | 0                    |
| <b>seq1653</b> | Firmicutes    | Clostridia   | 0                   | 0                    | 0                   | 0                    |
| <b>seq1736</b> | Firmicutes    | Clostridia   | 0                   | 0                    | 0                   | 0                    |
| <b>seq183</b>  | Firmicutes    | Clostridia   | 29                  | 102                  | 0                   | 0                    |
| <b>seq215</b>  | Firmicutes    | Clostridia   | 0                   | 0                    | 0                   | 0                    |
| <b>seq533</b>  | Firmicutes    | Clostridia   | 0                   | 0                    | 0                   | 0                    |
| <b>seq578</b>  | Firmicutes    | Clostridia   | 0                   | 0                    | 0                   | 0                    |
| <b>seq614</b>  | Firmicutes    | Clostridia   | 0                   | 0                    | 0                   | 0                    |
| <b>seq631</b>  | Firmicutes    | Clostridia   | 0                   | 0                    | 0                   | 0                    |
| <b>seq1095</b> | Firmicutes    | Clostridia   | 0                   | 0                    | 0                   | 0                    |
| <b>seq1227</b> | Firmicutes    | Clostridia   | 0                   | 0                    | 0                   | 0                    |
| <b>seq1575</b> | Firmicutes    | Clostridia   | 0                   | 22                   | 0                   | 0                    |
| <b>seq1738</b> | Firmicutes    | Clostridia   | 0                   | 11                   | 0                   | 0                    |
| <b>seq65</b>   | Firmicutes    | Clostridia   | 0                   | 0                    | 0                   | 0                    |
| <b>seq120</b>  | Firmicutes    | Clostridia   | 0                   | 0                    | 0                   | 0                    |
| <b>seq143</b>  | Firmicutes    | Clostridia   | 1383                | 1216                 | 49                  | 0                    |
| <b>seq149</b>  | Firmicutes    | Clostridia   | 0                   | 0                    | 0                   | 0                    |
| <b>seq176</b>  | Firmicutes    | Clostridia   | 0                   | 0                    | 0                   | 0                    |
| <b>seq354</b>  | Firmicutes    | Clostridia   | 0                   | 0                    | 0                   | 0                    |
| <b>seq377</b>  | Firmicutes    | Clostridia   | 0                   | 0                    | 0                   | 0                    |
| <b>seq592</b>  | Firmicutes    | Clostridia   | 0                   | 0                    | 0                   | 0                    |
| <b>seq648</b>  | Firmicutes    | Clostridia   | 0                   | 0                    | 0                   | 0                    |
| <b>seq687</b>  | Firmicutes    | Clostridia   | 0                   | 0                    | 0                   | 0                    |
| <b>seq1257</b> | Firmicutes    | Clostridia   | 0                   | 0                    | 0                   | 0                    |
| <b>seq1317</b> | Firmicutes    | Clostridia   | 0                   | 0                    | 0                   | 0                    |
| <b>seq144</b>  | Firmicutes    | Clostridia   | 371                 | 281                  | 0                   | 0                    |
| <b>seq423</b>  | Firmicutes    | Clostridia   | 0                   | 29                   | 0                   | 0                    |
| <b>seq104</b>  | Firmicutes    | Clostridia   | 297                 | 226                  | 121                 | 129                  |
| <b>seq312</b>  | Firmicutes    | Clostridia   | 0                   | 0                    | 0                   | 0                    |
| <b>seq136</b>  | Firmicutes    | Clostridia   | 0                   | 79                   | 0                   | 0                    |

Sequence Count Table

|                | <b>Phylum</b> | <b>Class</b> | <b>Δ</b> |  |  |  |
|----------------|---------------|--------------|----------|--|--|--|
| <b>seq1422</b> | Firmicutes    | Clostridia   |          |  |  |  |
| <b>seq1550</b> | Firmicutes    | Clostridia   |          |  |  |  |
| <b>seq1597</b> | Firmicutes    | Clostridia   |          |  |  |  |
| <b>seq1653</b> | Firmicutes    | Clostridia   |          |  |  |  |
| <b>seq1736</b> | Firmicutes    | Clostridia   |          |  |  |  |
| <b>seq183</b>  | Firmicutes    | Clostridia   |          |  |  |  |
| <b>seq215</b>  | Firmicutes    | Clostridia   |          |  |  |  |
| <b>seq533</b>  | Firmicutes    | Clostridia   |          |  |  |  |
| <b>seq578</b>  | Firmicutes    | Clostridia   |          |  |  |  |
| <b>seq614</b>  | Firmicutes    | Clostridia   |          |  |  |  |
| <b>seq631</b>  | Firmicutes    | Clostridia   |          |  |  |  |
| <b>seq1095</b> | Firmicutes    | Clostridia   |          |  |  |  |
| <b>seq1227</b> | Firmicutes    | Clostridia   |          |  |  |  |
| <b>seq1575</b> | Firmicutes    | Clostridia   |          |  |  |  |
| <b>seq1738</b> | Firmicutes    | Clostridia   |          |  |  |  |
| <b>seq65</b>   | Firmicutes    | Clostridia   |          |  |  |  |
| <b>seq120</b>  | Firmicutes    | Clostridia   |          |  |  |  |
| <b>seq143</b>  | Firmicutes    | Clostridia   |          |  |  |  |
| <b>seq149</b>  | Firmicutes    | Clostridia   |          |  |  |  |
| <b>seq176</b>  | Firmicutes    | Clostridia   |          |  |  |  |
| <b>seq354</b>  | Firmicutes    | Clostridia   |          |  |  |  |
| <b>seq377</b>  | Firmicutes    | Clostridia   |          |  |  |  |
| <b>seq592</b>  | Firmicutes    | Clostridia   |          |  |  |  |
| <b>seq648</b>  | Firmicutes    | Clostridia   |          |  |  |  |
| <b>seq687</b>  | Firmicutes    | Clostridia   |          |  |  |  |
| <b>seq1257</b> | Firmicutes    | Clostridia   |          |  |  |  |
| <b>seq1317</b> | Firmicutes    | Clostridia   |          |  |  |  |
| <b>seq144</b>  | Firmicutes    | Clostridia   |          |  |  |  |
| <b>seq423</b>  | Firmicutes    | Clostridia   |          |  |  |  |
| <b>seq104</b>  | Firmicutes    | Clostridia   |          |  |  |  |
| <b>seq312</b>  | Firmicutes    | Clostridia   |          |  |  |  |
| <b>seq136</b>  | Firmicutes    | Clostridia   |          |  |  |  |

Sequence Count Table

|                | <b>Phylum</b> | <b>Class</b> | <b>Order</b>  | <b>Family</b>   |
|----------------|---------------|--------------|---------------|-----------------|
| <b>seq153</b>  | Firmicutes    | Clostridia   | Clostridiales | Ruminococcaceae |
| <b>seq317</b>  | Firmicutes    | Clostridia   | Clostridiales | Ruminococcaceae |
| <b>seq428</b>  | Firmicutes    | Clostridia   | Clostridiales | Ruminococcaceae |
| <b>seq438</b>  | Firmicutes    | Clostridia   | Clostridiales | Ruminococcaceae |
| <b>seq446</b>  | Firmicutes    | Clostridia   | Clostridiales | Ruminococcaceae |
| <b>seq475</b>  | Firmicutes    | Clostridia   | Clostridiales | Ruminococcaceae |
| <b>seq546</b>  | Firmicutes    | Clostridia   | Clostridiales | Ruminococcaceae |
| <b>seq572</b>  | Firmicutes    | Clostridia   | Clostridiales | Ruminococcaceae |
| <b>seq593</b>  | Firmicutes    | Clostridia   | Clostridiales | Ruminococcaceae |
| <b>seq939</b>  | Firmicutes    | Clostridia   | Clostridiales | Ruminococcaceae |
| <b>seq1026</b> | Firmicutes    | Clostridia   | Clostridiales | Ruminococcaceae |
| <b>seq1082</b> | Firmicutes    | Clostridia   | Clostridiales | Ruminococcaceae |
| <b>seq1094</b> | Firmicutes    | Clostridia   | Clostridiales | Ruminococcaceae |
| <b>seq1104</b> | Firmicutes    | Clostridia   | Clostridiales | Ruminococcaceae |
| <b>seq1114</b> | Firmicutes    | Clostridia   | Clostridiales | Ruminococcaceae |
| <b>seq1171</b> | Firmicutes    | Clostridia   | Clostridiales | Ruminococcaceae |
| <b>seq1394</b> | Firmicutes    | Clostridia   | Clostridiales | Ruminococcaceae |
| <b>seq1523</b> | Firmicutes    | Clostridia   | Clostridiales | Ruminococcaceae |
| <b>seq1528</b> | Firmicutes    | Clostridia   | Clostridiales | Ruminococcaceae |
| <b>seq1536</b> | Firmicutes    | Clostridia   | Clostridiales | Ruminococcaceae |
| <b>seq1548</b> | Firmicutes    | Clostridia   | Clostridiales | Ruminococcaceae |
| <b>seq1556</b> | Firmicutes    | Clostridia   | Clostridiales | Ruminococcaceae |
| <b>seq1567</b> | Firmicutes    | Clostridia   | Clostridiales | Ruminococcaceae |
| <b>seq1626</b> | Firmicutes    | Clostridia   | Clostridiales | Ruminococcaceae |
| <b>seq1661</b> | Firmicutes    | Clostridia   | Clostridiales | Ruminococcaceae |
| <b>seq1673</b> | Firmicutes    | Clostridia   | Clostridiales | Ruminococcaceae |
| <b>seq1833</b> | Firmicutes    | Clostridia   | Clostridiales | Ruminococcaceae |
| <b>seq1325</b> | Firmicutes    | Clostridia   | Clostridiales | Ruminococcaceae |
| <b>seq1715</b> | Firmicutes    | Clostridia   | Clostridiales | Ruminococcaceae |
| <b>seq1781</b> | Firmicutes    | Clostridia   | Clostridiales | Ruminococcaceae |
| <b>seq1807</b> | Firmicutes    | Clostridia   | Clostridiales | Ruminococcaceae |
| <b>seq484</b>  | Firmicutes    | Clostridia   | Clostridiales | Ruminococcaceae |

Sequence Count Table

|                | <b>Phylum</b> | <b>Class</b> | <b>Genus</b>            | <b>Species</b> |
|----------------|---------------|--------------|-------------------------|----------------|
| <b>seq153</b>  | Firmicutes    | Clostridia   | Ruminococcaceae_UCG-005 |                |
| <b>seq317</b>  | Firmicutes    | Clostridia   | Ruminococcaceae_UCG-005 |                |
| <b>seq428</b>  | Firmicutes    | Clostridia   | Ruminococcaceae_UCG-005 |                |
| <b>seq438</b>  | Firmicutes    | Clostridia   | Ruminococcaceae_UCG-005 |                |
| <b>seq446</b>  | Firmicutes    | Clostridia   | Ruminococcaceae_UCG-005 |                |
| <b>seq475</b>  | Firmicutes    | Clostridia   | Ruminococcaceae_UCG-005 |                |
| <b>seq546</b>  | Firmicutes    | Clostridia   | Ruminococcaceae_UCG-005 |                |
| <b>seq572</b>  | Firmicutes    | Clostridia   | Ruminococcaceae_UCG-005 |                |
| <b>seq593</b>  | Firmicutes    | Clostridia   | Ruminococcaceae_UCG-005 |                |
| <b>seq939</b>  | Firmicutes    | Clostridia   | Ruminococcaceae_UCG-005 |                |
| <b>seq1026</b> | Firmicutes    | Clostridia   | Ruminococcaceae_UCG-005 |                |
| <b>seq1082</b> | Firmicutes    | Clostridia   | Ruminococcaceae_UCG-005 |                |
| <b>seq1094</b> | Firmicutes    | Clostridia   | Ruminococcaceae_UCG-005 |                |
| <b>seq1104</b> | Firmicutes    | Clostridia   | Ruminococcaceae_UCG-005 |                |
| <b>seq1114</b> | Firmicutes    | Clostridia   | Ruminococcaceae_UCG-005 |                |
| <b>seq1171</b> | Firmicutes    | Clostridia   | Ruminococcaceae_UCG-005 |                |
| <b>seq1394</b> | Firmicutes    | Clostridia   | Ruminococcaceae_UCG-005 |                |
| <b>seq1523</b> | Firmicutes    | Clostridia   | Ruminococcaceae_UCG-005 |                |
| <b>seq1528</b> | Firmicutes    | Clostridia   | Ruminococcaceae_UCG-005 |                |
| <b>seq1536</b> | Firmicutes    | Clostridia   | Ruminococcaceae_UCG-005 |                |
| <b>seq1548</b> | Firmicutes    | Clostridia   | Ruminococcaceae_UCG-005 |                |
| <b>seq1556</b> | Firmicutes    | Clostridia   | Ruminococcaceae_UCG-005 |                |
| <b>seq1567</b> | Firmicutes    | Clostridia   | Ruminococcaceae_UCG-005 |                |
| <b>seq1626</b> | Firmicutes    | Clostridia   | Ruminococcaceae_UCG-005 |                |
| <b>seq1661</b> | Firmicutes    | Clostridia   | Ruminococcaceae_UCG-005 |                |
| <b>seq1673</b> | Firmicutes    | Clostridia   | Ruminococcaceae_UCG-005 |                |
| <b>seq1833</b> | Firmicutes    | Clostridia   | Ruminococcaceae_UCG-005 |                |
| <b>seq1325</b> | Firmicutes    | Clostridia   | Ruminococcaceae_UCG-007 |                |
| <b>seq1715</b> | Firmicutes    | Clostridia   | Ruminococcaceae_UCG-007 |                |
| <b>seq1781</b> | Firmicutes    | Clostridia   | Ruminococcaceae_UCG-007 |                |
| <b>seq1807</b> | Firmicutes    | Clostridia   | Ruminococcaceae_UCG-007 |                |
| <b>seq484</b>  | Firmicutes    | Clostridia   | Ruminococcaceae_UCG-008 |                |

Sequence Count Table

|                | <b>Phylum</b> | <b>Class</b> | <b>Subject34WK0</b> | <b>Subject34WK12</b> | <b>Subject16WK0</b> | <b>Subject16WK12</b> |
|----------------|---------------|--------------|---------------------|----------------------|---------------------|----------------------|
| <b>seq153</b>  | Firmicutes    | Clostridia   | 0                   | 0                    | 0                   | 41                   |
| <b>seq317</b>  | Firmicutes    | Clostridia   | 0                   | 210                  | 0                   | 41                   |
| <b>seq428</b>  | Firmicutes    | Clostridia   | 0                   | 0                    | 20                  | 63                   |
| <b>seq438</b>  | Firmicutes    | Clostridia   | 0                   | 0                    | 0                   | 30                   |
| <b>seq446</b>  | Firmicutes    | Clostridia   | 0                   | 0                    | 0                   | 0                    |
| <b>seq475</b>  | Firmicutes    | Clostridia   | 30                  | 59                   | 0                   | 0                    |
| <b>seq546</b>  | Firmicutes    | Clostridia   | 0                   | 0                    | 52                  | 53                   |
| <b>seq572</b>  | Firmicutes    | Clostridia   | 0                   | 0                    | 0                   | 0                    |
| <b>seq593</b>  | Firmicutes    | Clostridia   | 0                   | 18                   | 0                   | 28                   |
| <b>seq939</b>  | Firmicutes    | Clostridia   | 0                   | 0                    | 0                   | 0                    |
| <b>seq1026</b> | Firmicutes    | Clostridia   | 0                   | 0                    | 0                   | 10                   |
| <b>seq1082</b> | Firmicutes    | Clostridia   | 0                   | 0                    | 0                   | 0                    |
| <b>seq1094</b> | Firmicutes    | Clostridia   | 0                   | 0                    | 0                   | 0                    |
| <b>seq1104</b> | Firmicutes    | Clostridia   | 0                   | 0                    | 0                   | 0                    |
| <b>seq1114</b> | Firmicutes    | Clostridia   | 0                   | 0                    | 27                  | 75                   |
| <b>seq1171</b> | Firmicutes    | Clostridia   | 0                   | 0                    | 0                   | 0                    |
| <b>seq1394</b> | Firmicutes    | Clostridia   | 0                   | 0                    | 0                   | 0                    |
| <b>seq1523</b> | Firmicutes    | Clostridia   | 0                   | 0                    | 0                   | 0                    |
| <b>seq1528</b> | Firmicutes    | Clostridia   | 0                   | 0                    | 0                   | 0                    |
| <b>seq1536</b> | Firmicutes    | Clostridia   | 0                   | 0                    | 0                   | 0                    |
| <b>seq1548</b> | Firmicutes    | Clostridia   | 0                   | 0                    | 0                   | 0                    |
| <b>seq1556</b> | Firmicutes    | Clostridia   | 0                   | 0                    | 0                   | 0                    |
| <b>seq1567</b> | Firmicutes    | Clostridia   | 0                   | 0                    | 0                   | 0                    |
| <b>seq1626</b> | Firmicutes    | Clostridia   | 0                   | 0                    | 0                   | 0                    |
| <b>seq1661</b> | Firmicutes    | Clostridia   | 0                   | 0                    | 0                   | 0                    |
| <b>seq1673</b> | Firmicutes    | Clostridia   | 0                   | 0                    | 0                   | 0                    |
| <b>seq1833</b> | Firmicutes    | Clostridia   | 0                   | 0                    | 0                   | 0                    |
| <b>seq1325</b> | Firmicutes    | Clostridia   | 0                   | 0                    | 0                   | 0                    |
| <b>seq1715</b> | Firmicutes    | Clostridia   | 0                   | 0                    | 0                   | 0                    |
| <b>seq1781</b> | Firmicutes    | Clostridia   | 0                   | 0                    | 0                   | 0                    |
| <b>seq1807</b> | Firmicutes    | Clostridia   | 0                   | 0                    | 0                   | 0                    |
| <b>seq484</b>  | Firmicutes    | Clostridia   | 0                   | 0                    | 0                   | 0                    |

Sequence Count Table

|                | <b>Phylum</b> | <b>Class</b> | <b>Subject17WK0</b> | <b>Subject17WK12</b> | <b>Subject1WK0</b> | <b>Subject1WK12</b> |
|----------------|---------------|--------------|---------------------|----------------------|--------------------|---------------------|
| <b>seq153</b>  | Firmicutes    | Clostridia   | 0                   | 0                    | 0                  | 0                   |
| <b>seq317</b>  | Firmicutes    | Clostridia   | 0                   | 0                    | 44                 | 58                  |
| <b>seq428</b>  | Firmicutes    | Clostridia   | 159                 | 148                  | 0                  | 0                   |
| <b>seq438</b>  | Firmicutes    | Clostridia   | 0                   | 0                    | 0                  | 0                   |
| <b>seq446</b>  | Firmicutes    | Clostridia   | 239                 | 120                  | 0                  | 0                   |
| <b>seq475</b>  | Firmicutes    | Clostridia   | 70                  | 152                  | 0                  | 0                   |
| <b>seq546</b>  | Firmicutes    | Clostridia   | 11                  | 79                   | 0                  | 0                   |
| <b>seq572</b>  | Firmicutes    | Clostridia   | 0                   | 0                    | 0                  | 48                  |
| <b>seq593</b>  | Firmicutes    | Clostridia   | 0                   | 0                    | 16                 | 26                  |
| <b>seq939</b>  | Firmicutes    | Clostridia   | 0                   | 0                    | 0                  | 0                   |
| <b>seq1026</b> | Firmicutes    | Clostridia   | 16                  | 23                   | 0                  | 15                  |
| <b>seq1082</b> | Firmicutes    | Clostridia   | 0                   | 0                    | 0                  | 0                   |
| <b>seq1094</b> | Firmicutes    | Clostridia   | 0                   | 0                    | 38                 | 0                   |
| <b>seq1104</b> | Firmicutes    | Clostridia   | 0                   | 0                    | 0                  | 0                   |
| <b>seq1114</b> | Firmicutes    | Clostridia   | 0                   | 0                    | 0                  | 0                   |
| <b>seq1171</b> | Firmicutes    | Clostridia   | 0                   | 0                    | 0                  | 0                   |
| <b>seq1394</b> | Firmicutes    | Clostridia   | 0                   | 0                    | 0                  | 0                   |
| <b>seq1523</b> | Firmicutes    | Clostridia   | 0                   | 0                    | 0                  | 0                   |
| <b>seq1528</b> | Firmicutes    | Clostridia   | 0                   | 0                    | 0                  | 0                   |
| <b>seq1536</b> | Firmicutes    | Clostridia   | 0                   | 0                    | 0                  | 0                   |
| <b>seq1548</b> | Firmicutes    | Clostridia   | 0                   | 0                    | 0                  | 0                   |
| <b>seq1556</b> | Firmicutes    | Clostridia   | 0                   | 0                    | 0                  | 0                   |
| <b>seq1567</b> | Firmicutes    | Clostridia   | 0                   | 0                    | 0                  | 0                   |
| <b>seq1626</b> | Firmicutes    | Clostridia   | 0                   | 0                    | 0                  | 0                   |
| <b>seq1661</b> | Firmicutes    | Clostridia   | 0                   | 0                    | 0                  | 0                   |
| <b>seq1673</b> | Firmicutes    | Clostridia   | 0                   | 0                    | 0                  | 0                   |
| <b>seq1833</b> | Firmicutes    | Clostridia   | 0                   | 0                    | 0                  | 0                   |
| <b>seq1325</b> | Firmicutes    | Clostridia   | 0                   | 0                    | 0                  | 0                   |
| <b>seq1715</b> | Firmicutes    | Clostridia   | 0                   | 0                    | 0                  | 0                   |
| <b>seq1781</b> | Firmicutes    | Clostridia   | 0                   | 0                    | 0                  | 0                   |
| <b>seq1807</b> | Firmicutes    | Clostridia   | 0                   | 0                    | 0                  | 0                   |
| <b>seq484</b>  | Firmicutes    | Clostridia   | 0                   | 0                    | 0                  | 0                   |



Sequence Count Table

|                | <b>Phylum</b> | <b>Class</b> | <b>Subject2WK0</b> | <b>Subject2WK12</b> | <b>Subject3WK0</b> | <b>Subject3WK12</b> |
|----------------|---------------|--------------|--------------------|---------------------|--------------------|---------------------|
| <b>seq153</b>  | Firmicutes    | Clostridia   | 0                  | 0                   | 0                  | 0                   |
| <b>seq317</b>  | Firmicutes    | Clostridia   | 0                  | 0                   | 0                  | 0                   |
| <b>seq428</b>  | Firmicutes    | Clostridia   | 0                  | 0                   | 0                  | 0                   |
| <b>seq438</b>  | Firmicutes    | Clostridia   | 0                  | 0                   | 0                  | 0                   |
| <b>seq446</b>  | Firmicutes    | Clostridia   | 0                  | 0                   | 0                  | 0                   |
| <b>seq475</b>  | Firmicutes    | Clostridia   | 0                  | 0                   | 0                  | 0                   |
| <b>seq546</b>  | Firmicutes    | Clostridia   | 0                  | 0                   | 0                  | 0                   |
| <b>seq572</b>  | Firmicutes    | Clostridia   | 0                  | 0                   | 0                  | 0                   |
| <b>seq593</b>  | Firmicutes    | Clostridia   | 0                  | 0                   | 0                  | 0                   |
| <b>seq939</b>  | Firmicutes    | Clostridia   | 0                  | 0                   | 0                  | 0                   |
| <b>seq1026</b> | Firmicutes    | Clostridia   | 0                  | 0                   | 0                  | 0                   |
| <b>seq1082</b> | Firmicutes    | Clostridia   | 0                  | 0                   | 0                  | 0                   |
| <b>seq1094</b> | Firmicutes    | Clostridia   | 0                  | 0                   | 0                  | 0                   |
| <b>seq1104</b> | Firmicutes    | Clostridia   | 0                  | 0                   | 0                  | 0                   |
| <b>seq1114</b> | Firmicutes    | Clostridia   | 0                  | 0                   | 0                  | 0                   |
| <b>seq1171</b> | Firmicutes    | Clostridia   | 0                  | 0                   | 0                  | 0                   |
| <b>seq1394</b> | Firmicutes    | Clostridia   | 0                  | 0                   | 0                  | 0                   |
| <b>seq1523</b> | Firmicutes    | Clostridia   | 0                  | 0                   | 0                  | 0                   |
| <b>seq1528</b> | Firmicutes    | Clostridia   | 0                  | 0                   | 0                  | 0                   |
| <b>seq1536</b> | Firmicutes    | Clostridia   | 0                  | 0                   | 0                  | 0                   |
| <b>seq1548</b> | Firmicutes    | Clostridia   | 0                  | 0                   | 0                  | 0                   |
| <b>seq1556</b> | Firmicutes    | Clostridia   | 0                  | 0                   | 0                  | 0                   |
| <b>seq1567</b> | Firmicutes    | Clostridia   | 0                  | 0                   | 0                  | 0                   |
| <b>seq1626</b> | Firmicutes    | Clostridia   | 0                  | 0                   | 0                  | 0                   |
| <b>seq1661</b> | Firmicutes    | Clostridia   | 0                  | 0                   | 0                  | 0                   |
| <b>seq1673</b> | Firmicutes    | Clostridia   | 0                  | 0                   | 0                  | 0                   |
| <b>seq1833</b> | Firmicutes    | Clostridia   | 0                  | 0                   | 0                  | 0                   |
| <b>seq1325</b> | Firmicutes    | Clostridia   | 0                  | 0                   | 0                  | 0                   |
| <b>seq1715</b> | Firmicutes    | Clostridia   | 0                  | 0                   | 0                  | 0                   |
| <b>seq1781</b> | Firmicutes    | Clostridia   | 0                  | 0                   | 0                  | 0                   |
| <b>seq1807</b> | Firmicutes    | Clostridia   | 0                  | 0                   | 0                  | 0                   |
| <b>seq484</b>  | Firmicutes    | Clostridia   | 0                  | 0                   | 0                  | 0                   |

Sequence Count Table

|                | <b>Phylum</b> | <b>Class</b> | <b>Subject4WK0</b> | <b>Subject4WK12</b> | <b>Subject5WK0</b> | <b>Subject5WK12</b> |
|----------------|---------------|--------------|--------------------|---------------------|--------------------|---------------------|
| <b>seq153</b>  | Firmicutes    | Clostridia   | 0                  | 0                   | 0                  | 0                   |
| <b>seq317</b>  | Firmicutes    | Clostridia   | 133                | 154                 | 0                  | 0                   |
| <b>seq428</b>  | Firmicutes    | Clostridia   | 0                  | 0                   | 0                  | 0                   |
| <b>seq438</b>  | Firmicutes    | Clostridia   | 0                  | 0                   | 0                  | 0                   |
| <b>seq446</b>  | Firmicutes    | Clostridia   | 0                  | 0                   | 0                  | 0                   |
| <b>seq475</b>  | Firmicutes    | Clostridia   | 250                | 199                 | 0                  | 0                   |
| <b>seq546</b>  | Firmicutes    | Clostridia   | 0                  | 0                   | 0                  | 0                   |
| <b>seq572</b>  | Firmicutes    | Clostridia   | 0                  | 0                   | 0                  | 0                   |
| <b>seq593</b>  | Firmicutes    | Clostridia   | 0                  | 0                   | 0                  | 0                   |
| <b>seq939</b>  | Firmicutes    | Clostridia   | 0                  | 0                   | 0                  | 0                   |
| <b>seq1026</b> | Firmicutes    | Clostridia   | 12                 | 0                   | 0                  | 0                   |
| <b>seq1082</b> | Firmicutes    | Clostridia   | 0                  | 0                   | 0                  | 0                   |
| <b>seq1094</b> | Firmicutes    | Clostridia   | 0                  | 0                   | 0                  | 0                   |
| <b>seq1104</b> | Firmicutes    | Clostridia   | 0                  | 0                   | 0                  | 0                   |
| <b>seq1114</b> | Firmicutes    | Clostridia   | 0                  | 0                   | 0                  | 0                   |
| <b>seq1171</b> | Firmicutes    | Clostridia   | 0                  | 0                   | 0                  | 0                   |
| <b>seq1394</b> | Firmicutes    | Clostridia   | 0                  | 0                   | 0                  | 0                   |
| <b>seq1523</b> | Firmicutes    | Clostridia   | 0                  | 5                   | 13                 | 0                   |
| <b>seq1528</b> | Firmicutes    | Clostridia   | 0                  | 0                   | 0                  | 0                   |
| <b>seq1536</b> | Firmicutes    | Clostridia   | 0                  | 0                   | 0                  | 0                   |
| <b>seq1548</b> | Firmicutes    | Clostridia   | 0                  | 0                   | 0                  | 0                   |
| <b>seq1556</b> | Firmicutes    | Clostridia   | 0                  | 0                   | 0                  | 0                   |
| <b>seq1567</b> | Firmicutes    | Clostridia   | 0                  | 0                   | 0                  | 0                   |
| <b>seq1626</b> | Firmicutes    | Clostridia   | 0                  | 0                   | 0                  | 0                   |
| <b>seq1661</b> | Firmicutes    | Clostridia   | 0                  | 0                   | 0                  | 0                   |
| <b>seq1673</b> | Firmicutes    | Clostridia   | 0                  | 0                   | 0                  | 0                   |
| <b>seq1833</b> | Firmicutes    | Clostridia   | 0                  | 0                   | 0                  | 0                   |
| <b>seq1325</b> | Firmicutes    | Clostridia   | 0                  | 0                   | 0                  | 0                   |
| <b>seq1715</b> | Firmicutes    | Clostridia   | 0                  | 0                   | 0                  | 0                   |
| <b>seq1781</b> | Firmicutes    | Clostridia   | 0                  | 0                   | 0                  | 0                   |
| <b>seq1807</b> | Firmicutes    | Clostridia   | 0                  | 7                   | 0                  | 0                   |
| <b>seq484</b>  | Firmicutes    | Clostridia   | 0                  | 0                   | 0                  | 0                   |

Sequence Count Table

|                | <b>Phylum</b> | <b>Class</b> | <b>Subject6WK0</b> | <b>Subject6WK12</b> | <b>Subject18WK0</b> | <b>Subject18WK12</b> |
|----------------|---------------|--------------|--------------------|---------------------|---------------------|----------------------|
| <b>seq153</b>  | Firmicutes    | Clostridia   | 699                | 271                 | 0                   | 0                    |
| <b>seq317</b>  | Firmicutes    | Clostridia   | 34                 | 176                 | 0                   | 0                    |
| <b>seq428</b>  | Firmicutes    | Clostridia   | 67                 | 51                  | 0                   | 0                    |
| <b>seq438</b>  | Firmicutes    | Clostridia   | 26                 | 0                   | 0                   | 0                    |
| <b>seq446</b>  | Firmicutes    | Clostridia   | 0                  | 0                   | 0                   | 0                    |
| <b>seq475</b>  | Firmicutes    | Clostridia   | 0                  | 0                   | 0                   | 0                    |
| <b>seq546</b>  | Firmicutes    | Clostridia   | 0                  | 0                   | 0                   | 0                    |
| <b>seq572</b>  | Firmicutes    | Clostridia   | 87                 | 41                  | 0                   | 0                    |
| <b>seq593</b>  | Firmicutes    | Clostridia   | 47                 | 75                  | 0                   | 0                    |
| <b>seq939</b>  | Firmicutes    | Clostridia   | 75                 | 47                  | 0                   | 0                    |
| <b>seq1026</b> | Firmicutes    | Clostridia   | 0                  | 0                   | 0                   | 0                    |
| <b>seq1082</b> | Firmicutes    | Clostridia   | 0                  | 0                   | 0                   | 0                    |
| <b>seq1094</b> | Firmicutes    | Clostridia   | 0                  | 0                   | 0                   | 0                    |
| <b>seq1104</b> | Firmicutes    | Clostridia   | 0                  | 0                   | 0                   | 0                    |
| <b>seq1114</b> | Firmicutes    | Clostridia   | 0                  | 0                   | 0                   | 0                    |
| <b>seq1171</b> | Firmicutes    | Clostridia   | 0                  | 0                   | 0                   | 0                    |
| <b>seq1394</b> | Firmicutes    | Clostridia   | 23                 | 19                  | 0                   | 0                    |
| <b>seq1523</b> | Firmicutes    | Clostridia   | 0                  | 0                   | 0                   | 0                    |
| <b>seq1528</b> | Firmicutes    | Clostridia   | 0                  | 0                   | 0                   | 0                    |
| <b>seq1536</b> | Firmicutes    | Clostridia   | 0                  | 0                   | 0                   | 0                    |
| <b>seq1548</b> | Firmicutes    | Clostridia   | 0                  | 0                   | 0                   | 0                    |
| <b>seq1556</b> | Firmicutes    | Clostridia   | 0                  | 0                   | 0                   | 0                    |
| <b>seq1567</b> | Firmicutes    | Clostridia   | 0                  | 0                   | 0                   | 0                    |
| <b>seq1626</b> | Firmicutes    | Clostridia   | 0                  | 0                   | 0                   | 0                    |
| <b>seq1661</b> | Firmicutes    | Clostridia   | 0                  | 0                   | 0                   | 0                    |
| <b>seq1673</b> | Firmicutes    | Clostridia   | 0                  | 14                  | 0                   | 0                    |
| <b>seq1833</b> | Firmicutes    | Clostridia   | 0                  | 0                   | 0                   | 0                    |
| <b>seq1325</b> | Firmicutes    | Clostridia   | 0                  | 0                   | 0                   | 0                    |
| <b>seq1715</b> | Firmicutes    | Clostridia   | 0                  | 0                   | 0                   | 0                    |
| <b>seq1781</b> | Firmicutes    | Clostridia   | 0                  | 0                   | 0                   | 0                    |
| <b>seq1807</b> | Firmicutes    | Clostridia   | 0                  | 0                   | 0                   | 0                    |
| <b>seq484</b>  | Firmicutes    | Clostridia   | 0                  | 0                   | 0                   | 0                    |

Sequence Count Table

|                | <b>Phylum</b> | <b>Class</b> | <b>Subject19WK0</b> | <b>Subject19WK12</b> | <b>Subject20WK0</b> | <b>Subject20WK12</b> |
|----------------|---------------|--------------|---------------------|----------------------|---------------------|----------------------|
| <b>seq153</b>  | Firmicutes    | Clostridia   | 0                   | 0                    | 1029                | 43                   |
| <b>seq317</b>  | Firmicutes    | Clostridia   | 0                   | 0                    | 0                   | 0                    |
| <b>seq428</b>  | Firmicutes    | Clostridia   | 0                   | 0                    | 53                  | 67                   |
| <b>seq438</b>  | Firmicutes    | Clostridia   | 0                   | 0                    | 94                  | 25                   |
| <b>seq446</b>  | Firmicutes    | Clostridia   | 0                   | 0                    | 30                  | 0                    |
| <b>seq475</b>  | Firmicutes    | Clostridia   | 0                   | 0                    | 0                   | 0                    |
| <b>seq546</b>  | Firmicutes    | Clostridia   | 0                   | 0                    | 200                 | 247                  |
| <b>seq572</b>  | Firmicutes    | Clostridia   | 0                   | 0                    | 0                   | 0                    |
| <b>seq593</b>  | Firmicutes    | Clostridia   | 0                   | 0                    | 17                  | 29                   |
| <b>seq939</b>  | Firmicutes    | Clostridia   | 0                   | 0                    | 0                   | 0                    |
| <b>seq1026</b> | Firmicutes    | Clostridia   | 0                   | 0                    | 0                   | 0                    |
| <b>seq1082</b> | Firmicutes    | Clostridia   | 0                   | 0                    | 111                 | 0                    |
| <b>seq1094</b> | Firmicutes    | Clostridia   | 0                   | 0                    | 0                   | 0                    |
| <b>seq1104</b> | Firmicutes    | Clostridia   | 0                   | 0                    | 0                   | 22                   |
| <b>seq1114</b> | Firmicutes    | Clostridia   | 0                   | 0                    | 0                   | 0                    |
| <b>seq1171</b> | Firmicutes    | Clostridia   | 0                   | 0                    | 88                  | 0                    |
| <b>seq1394</b> | Firmicutes    | Clostridia   | 0                   | 0                    | 0                   | 0                    |
| <b>seq1523</b> | Firmicutes    | Clostridia   | 0                   | 0                    | 0                   | 0                    |
| <b>seq1528</b> | Firmicutes    | Clostridia   | 0                   | 0                    | 0                   | 0                    |
| <b>seq1536</b> | Firmicutes    | Clostridia   | 0                   | 0                    | 0                   | 25                   |
| <b>seq1548</b> | Firmicutes    | Clostridia   | 0                   | 0                    | 0                   | 0                    |
| <b>seq1556</b> | Firmicutes    | Clostridia   | 0                   | 0                    | 0                   | 0                    |
| <b>seq1567</b> | Firmicutes    | Clostridia   | 0                   | 0                    | 22                  | 0                    |
| <b>seq1626</b> | Firmicutes    | Clostridia   | 0                   | 0                    | 0                   | 0                    |
| <b>seq1661</b> | Firmicutes    | Clostridia   | 0                   | 0                    | 15                  | 0                    |
| <b>seq1673</b> | Firmicutes    | Clostridia   | 0                   | 0                    | 0                   | 0                    |
| <b>seq1833</b> | Firmicutes    | Clostridia   | 0                   | 0                    | 0                   | 0                    |
| <b>seq1325</b> | Firmicutes    | Clostridia   | 0                   | 0                    | 0                   | 0                    |
| <b>seq1715</b> | Firmicutes    | Clostridia   | 0                   | 0                    | 0                   | 0                    |
| <b>seq1781</b> | Firmicutes    | Clostridia   | 0                   | 0                    | 0                   | 0                    |
| <b>seq1807</b> | Firmicutes    | Clostridia   | 0                   | 0                    | 0                   | 0                    |
| <b>seq484</b>  | Firmicutes    | Clostridia   | 0                   | 0                    | 0                   | 0                    |

Sequence Count Table

|                | <b>Phylum</b> | <b>Class</b> | <b>Subject7WK0</b> | <b>Subject7WK12</b> | <b>Subject21WK0</b> | <b>Subject21WK12</b> |
|----------------|---------------|--------------|--------------------|---------------------|---------------------|----------------------|
| <b>seq153</b>  | Firmicutes    | Clostridia   | 0                  | 0                   | 0                   | 0                    |
| <b>seq317</b>  | Firmicutes    | Clostridia   | 146                | 98                  | 0                   | 0                    |
| <b>seq428</b>  | Firmicutes    | Clostridia   | 0                  | 53                  | 0                   | 0                    |
| <b>seq438</b>  | Firmicutes    | Clostridia   | 0                  | 0                   | 0                   | 0                    |
| <b>seq446</b>  | Firmicutes    | Clostridia   | 0                  | 0                   | 0                   | 0                    |
| <b>seq475</b>  | Firmicutes    | Clostridia   | 0                  | 0                   | 0                   | 0                    |
| <b>seq546</b>  | Firmicutes    | Clostridia   | 0                  | 0                   | 0                   | 0                    |
| <b>seq572</b>  | Firmicutes    | Clostridia   | 0                  | 0                   | 0                   | 0                    |
| <b>seq593</b>  | Firmicutes    | Clostridia   | 23                 | 0                   | 0                   | 0                    |
| <b>seq939</b>  | Firmicutes    | Clostridia   | 0                  | 0                   | 0                   | 0                    |
| <b>seq1026</b> | Firmicutes    | Clostridia   | 36                 | 20                  | 0                   | 0                    |
| <b>seq1082</b> | Firmicutes    | Clostridia   | 0                  | 0                   | 0                   | 0                    |
| <b>seq1094</b> | Firmicutes    | Clostridia   | 0                  | 47                  | 0                   | 0                    |
| <b>seq1104</b> | Firmicutes    | Clostridia   | 0                  | 0                   | 0                   | 0                    |
| <b>seq1114</b> | Firmicutes    | Clostridia   | 0                  | 0                   | 0                   | 0                    |
| <b>seq1171</b> | Firmicutes    | Clostridia   | 0                  | 0                   | 0                   | 0                    |
| <b>seq1394</b> | Firmicutes    | Clostridia   | 0                  | 0                   | 0                   | 0                    |
| <b>seq1523</b> | Firmicutes    | Clostridia   | 0                  | 0                   | 0                   | 0                    |
| <b>seq1528</b> | Firmicutes    | Clostridia   | 0                  | 0                   | 0                   | 0                    |
| <b>seq1536</b> | Firmicutes    | Clostridia   | 0                  | 0                   | 0                   | 0                    |
| <b>seq1548</b> | Firmicutes    | Clostridia   | 0                  | 0                   | 0                   | 0                    |
| <b>seq1556</b> | Firmicutes    | Clostridia   | 0                  | 0                   | 0                   | 0                    |
| <b>seq1567</b> | Firmicutes    | Clostridia   | 0                  | 0                   | 0                   | 0                    |
| <b>seq1626</b> | Firmicutes    | Clostridia   | 0                  | 0                   | 0                   | 0                    |
| <b>seq1661</b> | Firmicutes    | Clostridia   | 0                  | 0                   | 0                   | 0                    |
| <b>seq1673</b> | Firmicutes    | Clostridia   | 0                  | 0                   | 0                   | 0                    |
| <b>seq1833</b> | Firmicutes    | Clostridia   | 0                  | 0                   | 0                   | 0                    |
| <b>seq1325</b> | Firmicutes    | Clostridia   | 0                  | 0                   | 0                   | 0                    |
| <b>seq1715</b> | Firmicutes    | Clostridia   | 0                  | 0                   | 0                   | 0                    |
| <b>seq1781</b> | Firmicutes    | Clostridia   | 0                  | 0                   | 0                   | 0                    |
| <b>seq1807</b> | Firmicutes    | Clostridia   | 0                  | 0                   | 0                   | 0                    |
| <b>seq484</b>  | Firmicutes    | Clostridia   | 0                  | 0                   | 0                   | 0                    |

Sequence Count Table

|                | <b>Phylum</b> | <b>Class</b> | <b>Subject8WK0</b> | <b>Subject8WK12</b> | <b>Subject9WK0</b> | <b>Subject9WK12</b> |
|----------------|---------------|--------------|--------------------|---------------------|--------------------|---------------------|
| <b>seq153</b>  | Firmicutes    | Clostridia   | 0                  | 0                   | 0                  | 0                   |
| <b>seq317</b>  | Firmicutes    | Clostridia   | 0                  | 0                   | 0                  | 0                   |
| <b>seq428</b>  | Firmicutes    | Clostridia   | 0                  | 0                   | 0                  | 0                   |
| <b>seq438</b>  | Firmicutes    | Clostridia   | 0                  | 0                   | 0                  | 0                   |
| <b>seq446</b>  | Firmicutes    | Clostridia   | 0                  | 0                   | 0                  | 0                   |
| <b>seq475</b>  | Firmicutes    | Clostridia   | 0                  | 0                   | 0                  | 0                   |
| <b>seq546</b>  | Firmicutes    | Clostridia   | 0                  | 0                   | 0                  | 0                   |
| <b>seq572</b>  | Firmicutes    | Clostridia   | 0                  | 0                   | 0                  | 0                   |
| <b>seq593</b>  | Firmicutes    | Clostridia   | 0                  | 0                   | 0                  | 0                   |
| <b>seq939</b>  | Firmicutes    | Clostridia   | 0                  | 0                   | 0                  | 0                   |
| <b>seq1026</b> | Firmicutes    | Clostridia   | 0                  | 0                   | 0                  | 0                   |
| <b>seq1082</b> | Firmicutes    | Clostridia   | 0                  | 0                   | 0                  | 0                   |
| <b>seq1094</b> | Firmicutes    | Clostridia   | 0                  | 0                   | 0                  | 0                   |
| <b>seq1104</b> | Firmicutes    | Clostridia   | 0                  | 0                   | 0                  | 0                   |
| <b>seq1114</b> | Firmicutes    | Clostridia   | 0                  | 0                   | 0                  | 0                   |
| <b>seq1171</b> | Firmicutes    | Clostridia   | 0                  | 0                   | 0                  | 0                   |
| <b>seq1394</b> | Firmicutes    | Clostridia   | 0                  | 0                   | 0                  | 0                   |
| <b>seq1523</b> | Firmicutes    | Clostridia   | 0                  | 0                   | 0                  | 0                   |
| <b>seq1528</b> | Firmicutes    | Clostridia   | 0                  | 0                   | 0                  | 0                   |
| <b>seq1536</b> | Firmicutes    | Clostridia   | 0                  | 0                   | 0                  | 0                   |
| <b>seq1548</b> | Firmicutes    | Clostridia   | 0                  | 0                   | 0                  | 0                   |
| <b>seq1556</b> | Firmicutes    | Clostridia   | 0                  | 0                   | 0                  | 0                   |
| <b>seq1567</b> | Firmicutes    | Clostridia   | 0                  | 0                   | 0                  | 0                   |
| <b>seq1626</b> | Firmicutes    | Clostridia   | 0                  | 0                   | 0                  | 0                   |
| <b>seq1661</b> | Firmicutes    | Clostridia   | 0                  | 0                   | 0                  | 0                   |
| <b>seq1673</b> | Firmicutes    | Clostridia   | 0                  | 0                   | 0                  | 0                   |
| <b>seq1833</b> | Firmicutes    | Clostridia   | 0                  | 0                   | 0                  | 0                   |
| <b>seq1325</b> | Firmicutes    | Clostridia   | 0                  | 0                   | 0                  | 0                   |
| <b>seq1715</b> | Firmicutes    | Clostridia   | 0                  | 0                   | 0                  | 0                   |
| <b>seq1781</b> | Firmicutes    | Clostridia   | 0                  | 0                   | 0                  | 0                   |
| <b>seq1807</b> | Firmicutes    | Clostridia   | 0                  | 0                   | 0                  | 0                   |
| <b>seq484</b>  | Firmicutes    | Clostridia   | 0                  | 0                   | 0                  | 0                   |

Sequence Count Table

|                | <b>Phylum</b> | <b>Class</b> | <b>Subject10WK0</b> | <b>Subject10WK12</b> | <b>Subject22WK0</b> | <b>Subject22WK12</b> |
|----------------|---------------|--------------|---------------------|----------------------|---------------------|----------------------|
| <b>seq153</b>  | Firmicutes    | Clostridia   | 0                   | 0                    | 2533                | 2081                 |
| <b>seq317</b>  | Firmicutes    | Clostridia   | 0                   | 0                    | 0                   | 0                    |
| <b>seq428</b>  | Firmicutes    | Clostridia   | 0                   | 0                    | 31                  | 33                   |
| <b>seq438</b>  | Firmicutes    | Clostridia   | 0                   | 0                    | 460                 | 418                  |
| <b>seq446</b>  | Firmicutes    | Clostridia   | 14                  | 0                    | 0                   | 0                    |
| <b>seq475</b>  | Firmicutes    | Clostridia   | 0                   | 0                    | 0                   | 0                    |
| <b>seq546</b>  | Firmicutes    | Clostridia   | 0                   | 0                    | 0                   | 0                    |
| <b>seq572</b>  | Firmicutes    | Clostridia   | 0                   | 0                    | 0                   | 19                   |
| <b>seq593</b>  | Firmicutes    | Clostridia   | 0                   | 0                    | 0                   | 0                    |
| <b>seq939</b>  | Firmicutes    | Clostridia   | 0                   | 0                    | 0                   | 0                    |
| <b>seq1026</b> | Firmicutes    | Clostridia   | 0                   | 0                    | 0                   | 0                    |
| <b>seq1082</b> | Firmicutes    | Clostridia   | 0                   | 0                    | 0                   | 0                    |
| <b>seq1094</b> | Firmicutes    | Clostridia   | 0                   | 0                    | 0                   | 0                    |
| <b>seq1104</b> | Firmicutes    | Clostridia   | 0                   | 0                    | 0                   | 0                    |
| <b>seq1114</b> | Firmicutes    | Clostridia   | 0                   | 0                    | 0                   | 0                    |
| <b>seq1171</b> | Firmicutes    | Clostridia   | 0                   | 0                    | 0                   | 0                    |
| <b>seq1394</b> | Firmicutes    | Clostridia   | 0                   | 0                    | 0                   | 0                    |
| <b>seq1523</b> | Firmicutes    | Clostridia   | 0                   | 8                    | 0                   | 0                    |
| <b>seq1528</b> | Firmicutes    | Clostridia   | 0                   | 0                    | 14                  | 12                   |
| <b>seq1536</b> | Firmicutes    | Clostridia   | 0                   | 0                    | 0                   | 0                    |
| <b>seq1548</b> | Firmicutes    | Clostridia   | 0                   | 0                    | 13                  | 11                   |
| <b>seq1556</b> | Firmicutes    | Clostridia   | 0                   | 0                    | 0                   | 0                    |
| <b>seq1567</b> | Firmicutes    | Clostridia   | 0                   | 0                    | 0                   | 0                    |
| <b>seq1626</b> | Firmicutes    | Clostridia   | 0                   | 0                    | 0                   | 0                    |
| <b>seq1661</b> | Firmicutes    | Clostridia   | 0                   | 0                    | 0                   | 0                    |
| <b>seq1673</b> | Firmicutes    | Clostridia   | 0                   | 0                    | 0                   | 0                    |
| <b>seq1833</b> | Firmicutes    | Clostridia   | 0                   | 0                    | 0                   | 6                    |
| <b>seq1325</b> | Firmicutes    | Clostridia   | 0                   | 0                    | 33                  | 19                   |
| <b>seq1715</b> | Firmicutes    | Clostridia   | 0                   | 0                    | 0                   | 12                   |
| <b>seq1781</b> | Firmicutes    | Clostridia   | 0                   | 0                    | 0                   | 0                    |
| <b>seq1807</b> | Firmicutes    | Clostridia   | 0                   | 0                    | 0                   | 0                    |
| <b>seq484</b>  | Firmicutes    | Clostridia   | 0                   | 0                    | 0                   | 0                    |

Sequence Count Table

|                | <b>Phylum</b> | <b>Class</b> | <b>Subject23WK0</b> | <b>Subject23WK12</b> | <b>Subject24WK0</b> | <b>Subject24WK12</b> |
|----------------|---------------|--------------|---------------------|----------------------|---------------------|----------------------|
| <b>seq153</b>  | Firmicutes    | Clostridia   | 339                 | 776                  | 0                   | 0                    |
| <b>seq317</b>  | Firmicutes    | Clostridia   | 0                   | 111                  | 0                   | 0                    |
| <b>seq428</b>  | Firmicutes    | Clostridia   | 0                   | 71                   | 73                  | 106                  |
| <b>seq438</b>  | Firmicutes    | Clostridia   | 0                   | 0                    | 0                   | 0                    |
| <b>seq446</b>  | Firmicutes    | Clostridia   | 0                   | 0                    | 72                  | 94                   |
| <b>seq475</b>  | Firmicutes    | Clostridia   | 0                   | 0                    | 25                  | 59                   |
| <b>seq546</b>  | Firmicutes    | Clostridia   | 0                   | 0                    | 0                   | 0                    |
| <b>seq572</b>  | Firmicutes    | Clostridia   | 73                  | 77                   | 0                   | 0                    |
| <b>seq593</b>  | Firmicutes    | Clostridia   | 0                   | 15                   | 17                  | 35                   |
| <b>seq939</b>  | Firmicutes    | Clostridia   | 0                   | 0                    | 0                   | 0                    |
| <b>seq1026</b> | Firmicutes    | Clostridia   | 0                   | 0                    | 0                   | 0                    |
| <b>seq1082</b> | Firmicutes    | Clostridia   | 0                   | 0                    | 0                   | 0                    |
| <b>seq1094</b> | Firmicutes    | Clostridia   | 0                   | 0                    | 0                   | 0                    |
| <b>seq1104</b> | Firmicutes    | Clostridia   | 0                   | 19                   | 0                   | 0                    |
| <b>seq1114</b> | Firmicutes    | Clostridia   | 0                   | 0                    | 0                   | 0                    |
| <b>seq1171</b> | Firmicutes    | Clostridia   | 0                   | 0                    | 0                   | 0                    |
| <b>seq1394</b> | Firmicutes    | Clostridia   | 0                   | 0                    | 0                   | 0                    |
| <b>seq1523</b> | Firmicutes    | Clostridia   | 0                   | 0                    | 0                   | 0                    |
| <b>seq1528</b> | Firmicutes    | Clostridia   | 0                   | 0                    | 0                   | 0                    |
| <b>seq1536</b> | Firmicutes    | Clostridia   | 0                   | 0                    | 0                   | 0                    |
| <b>seq1548</b> | Firmicutes    | Clostridia   | 0                   | 0                    | 0                   | 0                    |
| <b>seq1556</b> | Firmicutes    | Clostridia   | 0                   | 23                   | 0                   | 0                    |
| <b>seq1567</b> | Firmicutes    | Clostridia   | 0                   | 0                    | 0                   | 0                    |
| <b>seq1626</b> | Firmicutes    | Clostridia   | 0                   | 0                    | 0                   | 0                    |
| <b>seq1661</b> | Firmicutes    | Clostridia   | 0                   | 0                    | 0                   | 0                    |
| <b>seq1673</b> | Firmicutes    | Clostridia   | 0                   | 0                    | 0                   | 0                    |
| <b>seq1833</b> | Firmicutes    | Clostridia   | 0                   | 0                    | 0                   | 0                    |
| <b>seq1325</b> | Firmicutes    | Clostridia   | 0                   | 0                    | 0                   | 0                    |
| <b>seq1715</b> | Firmicutes    | Clostridia   | 0                   | 0                    | 0                   | 0                    |
| <b>seq1781</b> | Firmicutes    | Clostridia   | 0                   | 0                    | 0                   | 0                    |
| <b>seq1807</b> | Firmicutes    | Clostridia   | 0                   | 0                    | 0                   | 0                    |
| <b>seq484</b>  | Firmicutes    | Clostridia   | 0                   | 0                    | 0                   | 0                    |



Sequence Count Table

|                | <b>Phylum</b> | <b>Class</b> | <b>Subject11WK0</b> | <b>Subject11WK12</b> | <b>Subject12WK0</b> | <b>Subject12WK12</b> |
|----------------|---------------|--------------|---------------------|----------------------|---------------------|----------------------|
| <b>seq153</b>  | Firmicutes    | Clostridia   | 0                   | 0                    | 0                   | 0                    |
| <b>seq317</b>  | Firmicutes    | Clostridia   | 0                   | 0                    | 62                  | 49                   |
| <b>seq428</b>  | Firmicutes    | Clostridia   | 0                   | 0                    | 10                  | 0                    |
| <b>seq438</b>  | Firmicutes    | Clostridia   | 0                   | 0                    | 0                   | 0                    |
| <b>seq446</b>  | Firmicutes    | Clostridia   | 0                   | 0                    | 0                   | 0                    |
| <b>seq475</b>  | Firmicutes    | Clostridia   | 0                   | 0                    | 0                   | 0                    |
| <b>seq546</b>  | Firmicutes    | Clostridia   | 0                   | 0                    | 0                   | 0                    |
| <b>seq572</b>  | Firmicutes    | Clostridia   | 0                   | 0                    | 0                   | 0                    |
| <b>seq593</b>  | Firmicutes    | Clostridia   | 0                   | 0                    | 0                   | 0                    |
| <b>seq939</b>  | Firmicutes    | Clostridia   | 0                   | 0                    | 0                   | 17                   |
| <b>seq1026</b> | Firmicutes    | Clostridia   | 0                   | 0                    | 0                   | 0                    |
| <b>seq1082</b> | Firmicutes    | Clostridia   | 0                   | 0                    | 0                   | 0                    |
| <b>seq1094</b> | Firmicutes    | Clostridia   | 0                   | 0                    | 0                   | 0                    |
| <b>seq1104</b> | Firmicutes    | Clostridia   | 0                   | 0                    | 0                   | 0                    |
| <b>seq1114</b> | Firmicutes    | Clostridia   | 0                   | 0                    | 0                   | 0                    |
| <b>seq1171</b> | Firmicutes    | Clostridia   | 0                   | 0                    | 0                   | 0                    |
| <b>seq1394</b> | Firmicutes    | Clostridia   | 0                   | 0                    | 0                   | 0                    |
| <b>seq1523</b> | Firmicutes    | Clostridia   | 0                   | 0                    | 0                   | 0                    |
| <b>seq1528</b> | Firmicutes    | Clostridia   | 0                   | 0                    | 0                   | 0                    |
| <b>seq1536</b> | Firmicutes    | Clostridia   | 0                   | 0                    | 0                   | 0                    |
| <b>seq1548</b> | Firmicutes    | Clostridia   | 0                   | 0                    | 0                   | 0                    |
| <b>seq1556</b> | Firmicutes    | Clostridia   | 0                   | 0                    | 0                   | 0                    |
| <b>seq1567</b> | Firmicutes    | Clostridia   | 0                   | 0                    | 0                   | 0                    |
| <b>seq1626</b> | Firmicutes    | Clostridia   | 0                   | 0                    | 0                   | 0                    |
| <b>seq1661</b> | Firmicutes    | Clostridia   | 0                   | 0                    | 0                   | 0                    |
| <b>seq1673</b> | Firmicutes    | Clostridia   | 0                   | 0                    | 0                   | 0                    |
| <b>seq1833</b> | Firmicutes    | Clostridia   | 0                   | 0                    | 0                   | 0                    |
| <b>seq1325</b> | Firmicutes    | Clostridia   | 0                   | 0                    | 0                   | 0                    |
| <b>seq1715</b> | Firmicutes    | Clostridia   | 0                   | 0                    | 0                   | 0                    |
| <b>seq1781</b> | Firmicutes    | Clostridia   | 0                   | 0                    | 0                   | 0                    |
| <b>seq1807</b> | Firmicutes    | Clostridia   | 0                   | 0                    | 0                   | 0                    |
| <b>seq484</b>  | Firmicutes    | Clostridia   | 0                   | 0                    | 0                   | 0                    |

Sequence Count Table

|                | <b>Phylum</b> | <b>Class</b> | <b>Subject25WK0</b> | <b>Subject25WK12</b> | <b>Subject38WK0</b> | <b>Subject38WK12</b> |
|----------------|---------------|--------------|---------------------|----------------------|---------------------|----------------------|
| <b>seq153</b>  | Firmicutes    | Clostridia   | 12                  | 13                   | 0                   | 0                    |
| <b>seq317</b>  | Firmicutes    | Clostridia   | 167                 | 179                  | 0                   | 0                    |
| <b>seq428</b>  | Firmicutes    | Clostridia   | 0                   | 0                    | 0                   | 0                    |
| <b>seq438</b>  | Firmicutes    | Clostridia   | 0                   | 0                    | 0                   | 0                    |
| <b>seq446</b>  | Firmicutes    | Clostridia   | 0                   | 0                    | 0                   | 0                    |
| <b>seq475</b>  | Firmicutes    | Clostridia   | 0                   | 0                    | 0                   | 0                    |
| <b>seq546</b>  | Firmicutes    | Clostridia   | 0                   | 0                    | 0                   | 0                    |
| <b>seq572</b>  | Firmicutes    | Clostridia   | 0                   | 0                    | 0                   | 0                    |
| <b>seq593</b>  | Firmicutes    | Clostridia   | 0                   | 0                    | 0                   | 0                    |
| <b>seq939</b>  | Firmicutes    | Clostridia   | 0                   | 0                    | 0                   | 0                    |
| <b>seq1026</b> | Firmicutes    | Clostridia   | 0                   | 0                    | 0                   | 0                    |
| <b>seq1082</b> | Firmicutes    | Clostridia   | 0                   | 0                    | 0                   | 0                    |
| <b>seq1094</b> | Firmicutes    | Clostridia   | 0                   | 0                    | 0                   | 0                    |
| <b>seq1104</b> | Firmicutes    | Clostridia   | 0                   | 0                    | 0                   | 0                    |
| <b>seq1114</b> | Firmicutes    | Clostridia   | 0                   | 0                    | 0                   | 0                    |
| <b>seq1171</b> | Firmicutes    | Clostridia   | 0                   | 0                    | 0                   | 0                    |
| <b>seq1394</b> | Firmicutes    | Clostridia   | 0                   | 0                    | 0                   | 0                    |
| <b>seq1523</b> | Firmicutes    | Clostridia   | 0                   | 0                    | 0                   | 0                    |
| <b>seq1528</b> | Firmicutes    | Clostridia   | 0                   | 0                    | 0                   | 0                    |
| <b>seq1536</b> | Firmicutes    | Clostridia   | 0                   | 0                    | 0                   | 0                    |
| <b>seq1548</b> | Firmicutes    | Clostridia   | 0                   | 0                    | 0                   | 0                    |
| <b>seq1556</b> | Firmicutes    | Clostridia   | 0                   | 0                    | 0                   | 0                    |
| <b>seq1567</b> | Firmicutes    | Clostridia   | 0                   | 0                    | 0                   | 0                    |
| <b>seq1626</b> | Firmicutes    | Clostridia   | 0                   | 0                    | 0                   | 0                    |
| <b>seq1661</b> | Firmicutes    | Clostridia   | 0                   | 0                    | 0                   | 0                    |
| <b>seq1673</b> | Firmicutes    | Clostridia   | 0                   | 0                    | 0                   | 0                    |
| <b>seq1833</b> | Firmicutes    | Clostridia   | 0                   | 0                    | 0                   | 0                    |
| <b>seq1325</b> | Firmicutes    | Clostridia   | 0                   | 0                    | 0                   | 0                    |
| <b>seq1715</b> | Firmicutes    | Clostridia   | 0                   | 0                    | 0                   | 0                    |
| <b>seq1781</b> | Firmicutes    | Clostridia   | 0                   | 0                    | 0                   | 0                    |
| <b>seq1807</b> | Firmicutes    | Clostridia   | 0                   | 0                    | 0                   | 0                    |
| <b>seq484</b>  | Firmicutes    | Clostridia   | 0                   | 0                    | 0                   | 0                    |

Sequence Count Table

|                | <b>Phylum</b> | <b>Class</b> | <b>Subject31WK0</b> | <b>Subject31WK12</b> | <b>Subject32WK0</b> | <b>Subject32WK12</b> |
|----------------|---------------|--------------|---------------------|----------------------|---------------------|----------------------|
| <b>seq153</b>  | Firmicutes    | Clostridia   | 0                   | 0                    | 0                   | 0                    |
| <b>seq317</b>  | Firmicutes    | Clostridia   | 0                   | 0                    | 0                   | 0                    |
| <b>seq428</b>  | Firmicutes    | Clostridia   | 0                   | 0                    | 0                   | 0                    |
| <b>seq438</b>  | Firmicutes    | Clostridia   | 0                   | 0                    | 0                   | 0                    |
| <b>seq446</b>  | Firmicutes    | Clostridia   | 0                   | 0                    | 0                   | 0                    |
| <b>seq475</b>  | Firmicutes    | Clostridia   | 0                   | 0                    | 0                   | 0                    |
| <b>seq546</b>  | Firmicutes    | Clostridia   | 0                   | 0                    | 0                   | 0                    |
| <b>seq572</b>  | Firmicutes    | Clostridia   | 0                   | 0                    | 0                   | 0                    |
| <b>seq593</b>  | Firmicutes    | Clostridia   | 0                   | 0                    | 0                   | 0                    |
| <b>seq939</b>  | Firmicutes    | Clostridia   | 0                   | 0                    | 0                   | 0                    |
| <b>seq1026</b> | Firmicutes    | Clostridia   | 0                   | 0                    | 0                   | 0                    |
| <b>seq1082</b> | Firmicutes    | Clostridia   | 0                   | 0                    | 0                   | 0                    |
| <b>seq1094</b> | Firmicutes    | Clostridia   | 0                   | 0                    | 22                  | 0                    |
| <b>seq1104</b> | Firmicutes    | Clostridia   | 0                   | 0                    | 0                   | 0                    |
| <b>seq1114</b> | Firmicutes    | Clostridia   | 0                   | 0                    | 0                   | 0                    |
| <b>seq1171</b> | Firmicutes    | Clostridia   | 0                   | 0                    | 0                   | 0                    |
| <b>seq1394</b> | Firmicutes    | Clostridia   | 0                   | 0                    | 0                   | 0                    |
| <b>seq1523</b> | Firmicutes    | Clostridia   | 0                   | 0                    | 0                   | 0                    |
| <b>seq1528</b> | Firmicutes    | Clostridia   | 0                   | 0                    | 0                   | 0                    |
| <b>seq1536</b> | Firmicutes    | Clostridia   | 0                   | 0                    | 0                   | 0                    |
| <b>seq1548</b> | Firmicutes    | Clostridia   | 0                   | 0                    | 0                   | 0                    |
| <b>seq1556</b> | Firmicutes    | Clostridia   | 0                   | 0                    | 0                   | 0                    |
| <b>seq1567</b> | Firmicutes    | Clostridia   | 0                   | 0                    | 0                   | 0                    |
| <b>seq1626</b> | Firmicutes    | Clostridia   | 0                   | 0                    | 0                   | 0                    |
| <b>seq1661</b> | Firmicutes    | Clostridia   | 0                   | 0                    | 0                   | 0                    |
| <b>seq1673</b> | Firmicutes    | Clostridia   | 0                   | 0                    | 0                   | 0                    |
| <b>seq1833</b> | Firmicutes    | Clostridia   | 0                   | 0                    | 0                   | 0                    |
| <b>seq1325</b> | Firmicutes    | Clostridia   | 0                   | 0                    | 0                   | 0                    |
| <b>seq1715</b> | Firmicutes    | Clostridia   | 0                   | 0                    | 0                   | 0                    |
| <b>seq1781</b> | Firmicutes    | Clostridia   | 0                   | 0                    | 0                   | 0                    |
| <b>seq1807</b> | Firmicutes    | Clostridia   | 0                   | 0                    | 0                   | 0                    |
| <b>seq484</b>  | Firmicutes    | Clostridia   | 0                   | 0                    | 0                   | 0                    |

Sequence Count Table

|                | <b>Phylum</b> | <b>Class</b> | <b>Subject13WK0</b> | <b>Subject13WK12</b> | <b>Subject39WK0</b> | <b>Subject39WK12</b> |
|----------------|---------------|--------------|---------------------|----------------------|---------------------|----------------------|
| <b>seq153</b>  | Firmicutes    | Clostridia   | 105                 | 179                  | 0                   | 0                    |
| <b>seq317</b>  | Firmicutes    | Clostridia   | 69                  | 92                   | 0                   | 0                    |
| <b>seq428</b>  | Firmicutes    | Clostridia   | 0                   | 0                    | 0                   | 0                    |
| <b>seq438</b>  | Firmicutes    | Clostridia   | 0                   | 0                    | 0                   | 0                    |
| <b>seq446</b>  | Firmicutes    | Clostridia   | 0                   | 0                    | 0                   | 0                    |
| <b>seq475</b>  | Firmicutes    | Clostridia   | 0                   | 0                    | 0                   | 0                    |
| <b>seq546</b>  | Firmicutes    | Clostridia   | 0                   | 0                    | 0                   | 0                    |
| <b>seq572</b>  | Firmicutes    | Clostridia   | 90                  | 49                   | 0                   | 0                    |
| <b>seq593</b>  | Firmicutes    | Clostridia   | 24                  | 16                   | 0                   | 0                    |
| <b>seq939</b>  | Firmicutes    | Clostridia   | 0                   | 0                    | 0                   | 0                    |
| <b>seq1026</b> | Firmicutes    | Clostridia   | 0                   | 0                    | 0                   | 0                    |
| <b>seq1082</b> | Firmicutes    | Clostridia   | 0                   | 0                    | 0                   | 0                    |
| <b>seq1094</b> | Firmicutes    | Clostridia   | 0                   | 0                    | 0                   | 0                    |
| <b>seq1104</b> | Firmicutes    | Clostridia   | 0                   | 0                    | 0                   | 0                    |
| <b>seq1114</b> | Firmicutes    | Clostridia   | 0                   | 0                    | 0                   | 0                    |
| <b>seq1171</b> | Firmicutes    | Clostridia   | 0                   | 0                    | 0                   | 0                    |
| <b>seq1394</b> | Firmicutes    | Clostridia   | 0                   | 0                    | 0                   | 0                    |
| <b>seq1523</b> | Firmicutes    | Clostridia   | 0                   | 0                    | 0                   | 0                    |
| <b>seq1528</b> | Firmicutes    | Clostridia   | 0                   | 0                    | 0                   | 0                    |
| <b>seq1536</b> | Firmicutes    | Clostridia   | 0                   | 0                    | 0                   | 0                    |
| <b>seq1548</b> | Firmicutes    | Clostridia   | 0                   | 0                    | 0                   | 0                    |
| <b>seq1556</b> | Firmicutes    | Clostridia   | 0                   | 0                    | 0                   | 0                    |
| <b>seq1567</b> | Firmicutes    | Clostridia   | 0                   | 0                    | 0                   | 0                    |
| <b>seq1626</b> | Firmicutes    | Clostridia   | 0                   | 0                    | 0                   | 0                    |
| <b>seq1661</b> | Firmicutes    | Clostridia   | 0                   | 0                    | 0                   | 0                    |
| <b>seq1673</b> | Firmicutes    | Clostridia   | 0                   | 0                    | 0                   | 0                    |
| <b>seq1833</b> | Firmicutes    | Clostridia   | 0                   | 0                    | 0                   | 0                    |
| <b>seq1325</b> | Firmicutes    | Clostridia   | 0                   | 0                    | 0                   | 0                    |
| <b>seq1715</b> | Firmicutes    | Clostridia   | 0                   | 0                    | 0                   | 0                    |
| <b>seq1781</b> | Firmicutes    | Clostridia   | 0                   | 0                    | 0                   | 0                    |
| <b>seq1807</b> | Firmicutes    | Clostridia   | 0                   | 0                    | 0                   | 0                    |
| <b>seq484</b>  | Firmicutes    | Clostridia   | 0                   | 0                    | 0                   | 0                    |

Sequence Count Table

|                | <b>Phylum</b> | <b>Class</b> | <b>Subject26WK0</b> | <b>Subject26WK12</b> | <b>Subject14WK0</b> | <b>Subject14WK12</b> |
|----------------|---------------|--------------|---------------------|----------------------|---------------------|----------------------|
| <b>seq153</b>  | Firmicutes    | Clostridia   | 0                   | 0                    | 18                  | 121                  |
| <b>seq317</b>  | Firmicutes    | Clostridia   | 134                 | 14                   | 0                   | 0                    |
| <b>seq428</b>  | Firmicutes    | Clostridia   | 0                   | 0                    | 45                  | 44                   |
| <b>seq438</b>  | Firmicutes    | Clostridia   | 0                   | 0                    | 0                   | 0                    |
| <b>seq446</b>  | Firmicutes    | Clostridia   | 52                  | 0                    | 62                  | 322                  |
| <b>seq475</b>  | Firmicutes    | Clostridia   | 0                   | 0                    | 0                   | 0                    |
| <b>seq546</b>  | Firmicutes    | Clostridia   | 0                   | 0                    | 0                   | 0                    |
| <b>seq572</b>  | Firmicutes    | Clostridia   | 114                 | 0                    | 0                   | 0                    |
| <b>seq593</b>  | Firmicutes    | Clostridia   | 35                  | 72                   | 30                  | 17                   |
| <b>seq939</b>  | Firmicutes    | Clostridia   | 0                   | 0                    | 32                  | 0                    |
| <b>seq1026</b> | Firmicutes    | Clostridia   | 0                   | 0                    | 0                   | 0                    |
| <b>seq1082</b> | Firmicutes    | Clostridia   | 0                   | 0                    | 0                   | 0                    |
| <b>seq1094</b> | Firmicutes    | Clostridia   | 0                   | 0                    | 0                   | 0                    |
| <b>seq1104</b> | Firmicutes    | Clostridia   | 0                   | 0                    | 12                  | 51                   |
| <b>seq1114</b> | Firmicutes    | Clostridia   | 0                   | 0                    | 0                   | 0                    |
| <b>seq1171</b> | Firmicutes    | Clostridia   | 0                   | 0                    | 0                   | 0                    |
| <b>seq1394</b> | Firmicutes    | Clostridia   | 0                   | 0                    | 0                   | 0                    |
| <b>seq1523</b> | Firmicutes    | Clostridia   | 0                   | 0                    | 0                   | 0                    |
| <b>seq1528</b> | Firmicutes    | Clostridia   | 0                   | 0                    | 0                   | 0                    |
| <b>seq1536</b> | Firmicutes    | Clostridia   | 0                   | 0                    | 0                   | 0                    |
| <b>seq1548</b> | Firmicutes    | Clostridia   | 0                   | 0                    | 0                   | 0                    |
| <b>seq1556</b> | Firmicutes    | Clostridia   | 0                   | 0                    | 0                   | 0                    |
| <b>seq1567</b> | Firmicutes    | Clostridia   | 0                   | 0                    | 0                   | 0                    |
| <b>seq1626</b> | Firmicutes    | Clostridia   | 0                   | 0                    | 0                   | 18                   |
| <b>seq1661</b> | Firmicutes    | Clostridia   | 0                   | 0                    | 0                   | 0                    |
| <b>seq1673</b> | Firmicutes    | Clostridia   | 0                   | 0                    | 0                   | 0                    |
| <b>seq1833</b> | Firmicutes    | Clostridia   | 0                   | 0                    | 0                   | 0                    |
| <b>seq1325</b> | Firmicutes    | Clostridia   | 0                   | 0                    | 0                   | 0                    |
| <b>seq1715</b> | Firmicutes    | Clostridia   | 0                   | 0                    | 0                   | 0                    |
| <b>seq1781</b> | Firmicutes    | Clostridia   | 0                   | 9                    | 0                   | 0                    |
| <b>seq1807</b> | Firmicutes    | Clostridia   | 0                   | 0                    | 0                   | 0                    |
| <b>seq484</b>  | Firmicutes    | Clostridia   | 0                   | 0                    | 0                   | 0                    |

Sequence Count Table

|                | <b>Phylum</b> | <b>Class</b> | <b>Subject27WK0</b> | <b>Subject27WK12</b> | <b>Subject15WK0</b> | <b>Subject15WK12</b> |
|----------------|---------------|--------------|---------------------|----------------------|---------------------|----------------------|
| <b>seq153</b>  | Firmicutes    | Clostridia   | 0                   | 0                    | 0                   | 0                    |
| <b>seq317</b>  | Firmicutes    | Clostridia   | 0                   | 0                    | 20                  | 0                    |
| <b>seq428</b>  | Firmicutes    | Clostridia   | 0                   | 0                    | 0                   | 0                    |
| <b>seq438</b>  | Firmicutes    | Clostridia   | 0                   | 0                    | 0                   | 0                    |
| <b>seq446</b>  | Firmicutes    | Clostridia   | 0                   | 0                    | 0                   | 0                    |
| <b>seq475</b>  | Firmicutes    | Clostridia   | 0                   | 0                    | 0                   | 0                    |
| <b>seq546</b>  | Firmicutes    | Clostridia   | 0                   | 0                    | 0                   | 0                    |
| <b>seq572</b>  | Firmicutes    | Clostridia   | 0                   | 0                    | 0                   | 0                    |
| <b>seq593</b>  | Firmicutes    | Clostridia   | 0                   | 0                    | 0                   | 0                    |
| <b>seq939</b>  | Firmicutes    | Clostridia   | 0                   | 0                    | 0                   | 0                    |
| <b>seq1026</b> | Firmicutes    | Clostridia   | 0                   | 0                    | 0                   | 0                    |
| <b>seq1082</b> | Firmicutes    | Clostridia   | 0                   | 0                    | 0                   | 0                    |
| <b>seq1094</b> | Firmicutes    | Clostridia   | 0                   | 0                    | 0                   | 0                    |
| <b>seq1104</b> | Firmicutes    | Clostridia   | 0                   | 0                    | 0                   | 0                    |
| <b>seq1114</b> | Firmicutes    | Clostridia   | 0                   | 0                    | 0                   | 0                    |
| <b>seq1171</b> | Firmicutes    | Clostridia   | 0                   | 0                    | 0                   | 0                    |
| <b>seq1394</b> | Firmicutes    | Clostridia   | 0                   | 0                    | 0                   | 0                    |
| <b>seq1523</b> | Firmicutes    | Clostridia   | 0                   | 0                    | 0                   | 0                    |
| <b>seq1528</b> | Firmicutes    | Clostridia   | 0                   | 0                    | 0                   | 0                    |
| <b>seq1536</b> | Firmicutes    | Clostridia   | 0                   | 0                    | 0                   | 0                    |
| <b>seq1548</b> | Firmicutes    | Clostridia   | 0                   | 0                    | 0                   | 0                    |
| <b>seq1556</b> | Firmicutes    | Clostridia   | 0                   | 0                    | 0                   | 0                    |
| <b>seq1567</b> | Firmicutes    | Clostridia   | 0                   | 0                    | 0                   | 0                    |
| <b>seq1626</b> | Firmicutes    | Clostridia   | 0                   | 0                    | 0                   | 0                    |
| <b>seq1661</b> | Firmicutes    | Clostridia   | 0                   | 0                    | 0                   | 0                    |
| <b>seq1673</b> | Firmicutes    | Clostridia   | 0                   | 0                    | 0                   | 0                    |
| <b>seq1833</b> | Firmicutes    | Clostridia   | 0                   | 0                    | 0                   | 0                    |
| <b>seq1325</b> | Firmicutes    | Clostridia   | 0                   | 0                    | 0                   | 0                    |
| <b>seq1715</b> | Firmicutes    | Clostridia   | 0                   | 0                    | 0                   | 0                    |
| <b>seq1781</b> | Firmicutes    | Clostridia   | 0                   | 0                    | 0                   | 0                    |
| <b>seq1807</b> | Firmicutes    | Clostridia   | 0                   | 0                    | 0                   | 0                    |
| <b>seq484</b>  | Firmicutes    | Clostridia   | 279                 | 540                  | 0                   | 0                    |

Sequence Count Table

|                | <b>Phylum</b> | <b>Class</b> | <b>Δ</b> |  |  |  |
|----------------|---------------|--------------|----------|--|--|--|
| <b>seq153</b>  | Firmicutes    | Clostridia   |          |  |  |  |
| <b>seq317</b>  | Firmicutes    | Clostridia   |          |  |  |  |
| <b>seq428</b>  | Firmicutes    | Clostridia   |          |  |  |  |
| <b>seq438</b>  | Firmicutes    | Clostridia   |          |  |  |  |
| <b>seq446</b>  | Firmicutes    | Clostridia   |          |  |  |  |
| <b>seq475</b>  | Firmicutes    | Clostridia   |          |  |  |  |
| <b>seq546</b>  | Firmicutes    | Clostridia   |          |  |  |  |
| <b>seq572</b>  | Firmicutes    | Clostridia   |          |  |  |  |
| <b>seq593</b>  | Firmicutes    | Clostridia   |          |  |  |  |
| <b>seq939</b>  | Firmicutes    | Clostridia   |          |  |  |  |
| <b>seq1026</b> | Firmicutes    | Clostridia   |          |  |  |  |
| <b>seq1082</b> | Firmicutes    | Clostridia   |          |  |  |  |
| <b>seq1094</b> | Firmicutes    | Clostridia   |          |  |  |  |
| <b>seq1104</b> | Firmicutes    | Clostridia   |          |  |  |  |
| <b>seq1114</b> | Firmicutes    | Clostridia   |          |  |  |  |
| <b>seq1171</b> | Firmicutes    | Clostridia   |          |  |  |  |
| <b>seq1394</b> | Firmicutes    | Clostridia   |          |  |  |  |
| <b>seq1523</b> | Firmicutes    | Clostridia   |          |  |  |  |
| <b>seq1528</b> | Firmicutes    | Clostridia   |          |  |  |  |
| <b>seq1536</b> | Firmicutes    | Clostridia   |          |  |  |  |
| <b>seq1548</b> | Firmicutes    | Clostridia   |          |  |  |  |
| <b>seq1556</b> | Firmicutes    | Clostridia   |          |  |  |  |
| <b>seq1567</b> | Firmicutes    | Clostridia   |          |  |  |  |
| <b>seq1626</b> | Firmicutes    | Clostridia   |          |  |  |  |
| <b>seq1661</b> | Firmicutes    | Clostridia   |          |  |  |  |
| <b>seq1673</b> | Firmicutes    | Clostridia   |          |  |  |  |
| <b>seq1833</b> | Firmicutes    | Clostridia   |          |  |  |  |
| <b>seq1325</b> | Firmicutes    | Clostridia   |          |  |  |  |
| <b>seq1715</b> | Firmicutes    | Clostridia   |          |  |  |  |
| <b>seq1781</b> | Firmicutes    | Clostridia   |          |  |  |  |
| <b>seq1807</b> | Firmicutes    | Clostridia   |          |  |  |  |
| <b>seq484</b>  | Firmicutes    | Clostridia   |          |  |  |  |

Sequence Count Table

|                | <b>Phylum</b> | <b>Class</b> | <b>Order</b>  | <b>Family</b>   |
|----------------|---------------|--------------|---------------|-----------------|
| <b>seq652</b>  | Firmicutes    | Clostridia   | Clostridiales | Ruminococcaceae |
| <b>seq1464</b> | Firmicutes    | Clostridia   | Clostridiales | Ruminococcaceae |
| <b>seq510</b>  | Firmicutes    | Clostridia   | Clostridiales | Ruminococcaceae |
| <b>seq986</b>  | Firmicutes    | Clostridia   | Clostridiales | Ruminococcaceae |
| <b>seq1150</b> | Firmicutes    | Clostridia   | Clostridiales | Ruminococcaceae |
| <b>seq1158</b> | Firmicutes    | Clostridia   | Clostridiales | Ruminococcaceae |
| <b>seq1280</b> | Firmicutes    | Clostridia   | Clostridiales | Ruminococcaceae |
| <b>seq1840</b> | Firmicutes    | Clostridia   | Clostridiales | Ruminococcaceae |
| <b>seq367</b>  | Firmicutes    | Clostridia   | Clostridiales | Ruminococcaceae |
| <b>seq401</b>  | Firmicutes    | Clostridia   | Clostridiales | Ruminococcaceae |
| <b>seq506</b>  | Firmicutes    | Clostridia   | Clostridiales | Ruminococcaceae |
| <b>seq540</b>  | Firmicutes    | Clostridia   | Clostridiales | Ruminococcaceae |
| <b>seq596</b>  | Firmicutes    | Clostridia   | Clostridiales | Ruminococcaceae |
| <b>seq638</b>  | Firmicutes    | Clostridia   | Clostridiales | Ruminococcaceae |
| <b>seq724</b>  | Firmicutes    | Clostridia   | Clostridiales | Ruminococcaceae |
| <b>seq741</b>  | Firmicutes    | Clostridia   | Clostridiales | Ruminococcaceae |
| <b>seq900</b>  | Firmicutes    | Clostridia   | Clostridiales | Ruminococcaceae |
| <b>seq902</b>  | Firmicutes    | Clostridia   | Clostridiales | Ruminococcaceae |
| <b>seq917</b>  | Firmicutes    | Clostridia   | Clostridiales | Ruminococcaceae |
| <b>seq1009</b> | Firmicutes    | Clostridia   | Clostridiales | Ruminococcaceae |
| <b>seq1049</b> | Firmicutes    | Clostridia   | Clostridiales | Ruminococcaceae |
| <b>seq1086</b> | Firmicutes    | Clostridia   | Clostridiales | Ruminococcaceae |
| <b>seq1125</b> | Firmicutes    | Clostridia   | Clostridiales | Ruminococcaceae |
| <b>seq1252</b> | Firmicutes    | Clostridia   | Clostridiales | Ruminococcaceae |
| <b>seq1278</b> | Firmicutes    | Clostridia   | Clostridiales | Ruminococcaceae |
| <b>seq1307</b> | Firmicutes    | Clostridia   | Clostridiales | Ruminococcaceae |
| <b>seq1310</b> | Firmicutes    | Clostridia   | Clostridiales | Ruminococcaceae |
| <b>seq1315</b> | Firmicutes    | Clostridia   | Clostridiales | Ruminococcaceae |
| <b>seq1391</b> | Firmicutes    | Clostridia   | Clostridiales | Ruminococcaceae |
| <b>seq1399</b> | Firmicutes    | Clostridia   | Clostridiales | Ruminococcaceae |
| <b>seq1408</b> | Firmicutes    | Clostridia   | Clostridiales | Ruminococcaceae |
| <b>seq1424</b> | Firmicutes    | Clostridia   | Clostridiales | Ruminococcaceae |



Sequence Count Table

|                | <b>Phylum</b> | <b>Class</b> | <b>Genus</b>            | <b>Species</b> |
|----------------|---------------|--------------|-------------------------|----------------|
| <b>seq652</b>  | Firmicutes    | Clostridia   | Ruminococcaceae_UCG-008 |                |
| <b>seq1464</b> | Firmicutes    | Clostridia   | Ruminococcaceae_UCG-008 |                |
| <b>seq510</b>  | Firmicutes    | Clostridia   | Ruminococcaceae_UCG-009 |                |
| <b>seq986</b>  | Firmicutes    | Clostridia   | Ruminococcaceae_UCG-009 |                |
| <b>seq1150</b> | Firmicutes    | Clostridia   | Ruminococcaceae_UCG-009 |                |
| <b>seq1158</b> | Firmicutes    | Clostridia   | Ruminococcaceae_UCG-009 |                |
| <b>seq1280</b> | Firmicutes    | Clostridia   | Ruminococcaceae_UCG-009 |                |
| <b>seq1840</b> | Firmicutes    | Clostridia   | Ruminococcaceae_UCG-009 |                |
| <b>seq367</b>  | Firmicutes    | Clostridia   | Ruminococcaceae_UCG-010 |                |
| <b>seq401</b>  | Firmicutes    | Clostridia   | Ruminococcaceae_UCG-010 |                |
| <b>seq506</b>  | Firmicutes    | Clostridia   | Ruminococcaceae_UCG-010 |                |
| <b>seq540</b>  | Firmicutes    | Clostridia   | Ruminococcaceae_UCG-010 |                |
| <b>seq596</b>  | Firmicutes    | Clostridia   | Ruminococcaceae_UCG-010 |                |
| <b>seq638</b>  | Firmicutes    | Clostridia   | Ruminococcaceae_UCG-010 |                |
| <b>seq724</b>  | Firmicutes    | Clostridia   | Ruminococcaceae_UCG-010 |                |
| <b>seq741</b>  | Firmicutes    | Clostridia   | Ruminococcaceae_UCG-010 |                |
| <b>seq900</b>  | Firmicutes    | Clostridia   | Ruminococcaceae_UCG-010 |                |
| <b>seq902</b>  | Firmicutes    | Clostridia   | Ruminococcaceae_UCG-010 |                |
| <b>seq917</b>  | Firmicutes    | Clostridia   | Ruminococcaceae_UCG-010 |                |
| <b>seq1009</b> | Firmicutes    | Clostridia   | Ruminococcaceae_UCG-010 |                |
| <b>seq1049</b> | Firmicutes    | Clostridia   | Ruminococcaceae_UCG-010 |                |
| <b>seq1086</b> | Firmicutes    | Clostridia   | Ruminococcaceae_UCG-010 |                |
| <b>seq1125</b> | Firmicutes    | Clostridia   | Ruminococcaceae_UCG-010 |                |
| <b>seq1252</b> | Firmicutes    | Clostridia   | Ruminococcaceae_UCG-010 |                |
| <b>seq1278</b> | Firmicutes    | Clostridia   | Ruminococcaceae_UCG-010 |                |
| <b>seq1307</b> | Firmicutes    | Clostridia   | Ruminococcaceae_UCG-010 |                |
| <b>seq1310</b> | Firmicutes    | Clostridia   | Ruminococcaceae_UCG-010 |                |
| <b>seq1315</b> | Firmicutes    | Clostridia   | Ruminococcaceae_UCG-010 |                |
| <b>seq1391</b> | Firmicutes    | Clostridia   | Ruminococcaceae_UCG-010 |                |
| <b>seq1399</b> | Firmicutes    | Clostridia   | Ruminococcaceae_UCG-010 |                |
| <b>seq1408</b> | Firmicutes    | Clostridia   | Ruminococcaceae_UCG-010 |                |
| <b>seq1424</b> | Firmicutes    | Clostridia   | Ruminococcaceae_UCG-010 |                |

Sequence Count Table

|                | <b>Phylum</b> | <b>Class</b> | <b>Subject34WK0</b> | <b>Subject34WK12</b> | <b>Subject16WK0</b> | <b>Subject16WK12</b> |
|----------------|---------------|--------------|---------------------|----------------------|---------------------|----------------------|
| <b>seq652</b>  | Firmicutes    | Clostridia   | 0                   | 0                    | 0                   | 0                    |
| <b>seq1464</b> | Firmicutes    | Clostridia   | 0                   | 0                    | 0                   | 12                   |
| <b>seq510</b>  | Firmicutes    | Clostridia   | 0                   | 0                    | 0                   | 14                   |
| <b>seq986</b>  | Firmicutes    | Clostridia   | 0                   | 0                    | 0                   | 0                    |
| <b>seq1150</b> | Firmicutes    | Clostridia   | 0                   | 0                    | 0                   | 0                    |
| <b>seq1158</b> | Firmicutes    | Clostridia   | 0                   | 0                    | 0                   | 0                    |
| <b>seq1280</b> | Firmicutes    | Clostridia   | 0                   | 0                    | 0                   | 0                    |
| <b>seq1840</b> | Firmicutes    | Clostridia   | 0                   | 0                    | 0                   | 0                    |
| <b>seq367</b>  | Firmicutes    | Clostridia   | 0                   | 0                    | 46                  | 92                   |
| <b>seq401</b>  | Firmicutes    | Clostridia   | 0                   | 0                    | 0                   | 0                    |
| <b>seq506</b>  | Firmicutes    | Clostridia   | 0                   | 0                    | 0                   | 0                    |
| <b>seq540</b>  | Firmicutes    | Clostridia   | 0                   | 0                    | 0                   | 0                    |
| <b>seq596</b>  | Firmicutes    | Clostridia   | 0                   | 0                    | 0                   | 0                    |
| <b>seq638</b>  | Firmicutes    | Clostridia   | 0                   | 6                    | 49                  | 12                   |
| <b>seq724</b>  | Firmicutes    | Clostridia   | 0                   | 0                    | 0                   | 0                    |
| <b>seq741</b>  | Firmicutes    | Clostridia   | 0                   | 0                    | 0                   | 0                    |
| <b>seq900</b>  | Firmicutes    | Clostridia   | 0                   | 0                    | 15                  | 58                   |
| <b>seq902</b>  | Firmicutes    | Clostridia   | 0                   | 0                    | 12                  | 12                   |
| <b>seq917</b>  | Firmicutes    | Clostridia   | 0                   | 0                    | 0                   | 0                    |
| <b>seq1009</b> | Firmicutes    | Clostridia   | 0                   | 0                    | 0                   | 0                    |
| <b>seq1049</b> | Firmicutes    | Clostridia   | 0                   | 0                    | 0                   | 0                    |
| <b>seq1086</b> | Firmicutes    | Clostridia   | 0                   | 0                    | 0                   | 0                    |
| <b>seq1125</b> | Firmicutes    | Clostridia   | 0                   | 0                    | 0                   | 0                    |
| <b>seq1252</b> | Firmicutes    | Clostridia   | 0                   | 0                    | 0                   | 0                    |
| <b>seq1278</b> | Firmicutes    | Clostridia   | 0                   | 0                    | 0                   | 0                    |
| <b>seq1307</b> | Firmicutes    | Clostridia   | 0                   | 0                    | 0                   | 0                    |
| <b>seq1310</b> | Firmicutes    | Clostridia   | 0                   | 0                    | 0                   | 0                    |
| <b>seq1315</b> | Firmicutes    | Clostridia   | 0                   | 0                    | 0                   | 0                    |
| <b>seq1391</b> | Firmicutes    | Clostridia   | 0                   | 0                    | 0                   | 42                   |
| <b>seq1399</b> | Firmicutes    | Clostridia   | 0                   | 0                    | 0                   | 0                    |
| <b>seq1408</b> | Firmicutes    | Clostridia   | 0                   | 0                    | 0                   | 0                    |
| <b>seq1424</b> | Firmicutes    | Clostridia   | 0                   | 0                    | 0                   | 0                    |

Sequence Count Table

|                | <b>Phylum</b> | <b>Class</b> | <b>Subject17WK0</b> | <b>Subject17WK12</b> | <b>Subject1WK0</b> | <b>Subject1WK12</b> |
|----------------|---------------|--------------|---------------------|----------------------|--------------------|---------------------|
| <b>seq652</b>  | Firmicutes    | Clostridia   | 0                   | 0                    | 0                  | 0                   |
| <b>seq1464</b> | Firmicutes    | Clostridia   | 0                   | 0                    | 0                  | 0                   |
| <b>seq510</b>  | Firmicutes    | Clostridia   | 0                   | 0                    | 0                  | 0                   |
| <b>seq986</b>  | Firmicutes    | Clostridia   | 0                   | 0                    | 0                  | 0                   |
| <b>seq1150</b> | Firmicutes    | Clostridia   | 0                   | 0                    | 0                  | 0                   |
| <b>seq1158</b> | Firmicutes    | Clostridia   | 0                   | 0                    | 0                  | 0                   |
| <b>seq1280</b> | Firmicutes    | Clostridia   | 0                   | 0                    | 0                  | 0                   |
| <b>seq1840</b> | Firmicutes    | Clostridia   | 0                   | 0                    | 0                  | 0                   |
| <b>seq367</b>  | Firmicutes    | Clostridia   | 0                   | 0                    | 0                  | 0                   |
| <b>seq401</b>  | Firmicutes    | Clostridia   | 0                   | 0                    | 0                  | 0                   |
| <b>seq506</b>  | Firmicutes    | Clostridia   | 0                   | 0                    | 27                 | 27                  |
| <b>seq540</b>  | Firmicutes    | Clostridia   | 0                   | 0                    | 0                  | 0                   |
| <b>seq596</b>  | Firmicutes    | Clostridia   | 0                   | 0                    | 0                  | 0                   |
| <b>seq638</b>  | Firmicutes    | Clostridia   | 7                   | 11                   | 0                  | 0                   |
| <b>seq724</b>  | Firmicutes    | Clostridia   | 0                   | 0                    | 0                  | 0                   |
| <b>seq741</b>  | Firmicutes    | Clostridia   | 0                   | 0                    | 0                  | 0                   |
| <b>seq900</b>  | Firmicutes    | Clostridia   | 0                   | 0                    | 0                  | 0                   |
| <b>seq902</b>  | Firmicutes    | Clostridia   | 0                   | 0                    | 0                  | 0                   |
| <b>seq917</b>  | Firmicutes    | Clostridia   | 0                   | 0                    | 0                  | 0                   |
| <b>seq1009</b> | Firmicutes    | Clostridia   | 0                   | 0                    | 0                  | 0                   |
| <b>seq1049</b> | Firmicutes    | Clostridia   | 0                   | 0                    | 0                  | 0                   |
| <b>seq1086</b> | Firmicutes    | Clostridia   | 0                   | 0                    | 0                  | 0                   |
| <b>seq1125</b> | Firmicutes    | Clostridia   | 0                   | 0                    | 0                  | 0                   |
| <b>seq1252</b> | Firmicutes    | Clostridia   | 0                   | 0                    | 0                  | 0                   |
| <b>seq1278</b> | Firmicutes    | Clostridia   | 12                  | 9                    | 0                  | 0                   |
| <b>seq1307</b> | Firmicutes    | Clostridia   | 0                   | 0                    | 0                  | 0                   |
| <b>seq1310</b> | Firmicutes    | Clostridia   | 0                   | 0                    | 5                  | 7                   |
| <b>seq1315</b> | Firmicutes    | Clostridia   | 0                   | 0                    | 0                  | 0                   |
| <b>seq1391</b> | Firmicutes    | Clostridia   | 0                   | 0                    | 0                  | 0                   |
| <b>seq1399</b> | Firmicutes    | Clostridia   | 0                   | 0                    | 0                  | 0                   |
| <b>seq1408</b> | Firmicutes    | Clostridia   | 0                   | 0                    | 0                  | 0                   |
| <b>seq1424</b> | Firmicutes    | Clostridia   | 0                   | 0                    | 0                  | 0                   |

Sequence Count Table

|                | <b>Phylum</b> | <b>Class</b> | <b>Subject2WK0</b> | <b>Subject2WK12</b> | <b>Subject3WK0</b> | <b>Subject3WK12</b> |
|----------------|---------------|--------------|--------------------|---------------------|--------------------|---------------------|
| <b>seq652</b>  | Firmicutes    | Clostridia   | 0                  | 0                   | 0                  | 0                   |
| <b>seq1464</b> | Firmicutes    | Clostridia   | 0                  | 0                   | 0                  | 0                   |
| <b>seq510</b>  | Firmicutes    | Clostridia   | 0                  | 0                   | 127                | 0                   |
| <b>seq986</b>  | Firmicutes    | Clostridia   | 0                  | 0                   | 0                  | 0                   |
| <b>seq1150</b> | Firmicutes    | Clostridia   | 0                  | 0                   | 0                  | 0                   |
| <b>seq1158</b> | Firmicutes    | Clostridia   | 0                  | 0                   | 0                  | 0                   |
| <b>seq1280</b> | Firmicutes    | Clostridia   | 0                  | 0                   | 0                  | 0                   |
| <b>seq1840</b> | Firmicutes    | Clostridia   | 0                  | 0                   | 0                  | 0                   |
| <b>seq367</b>  | Firmicutes    | Clostridia   | 0                  | 0                   | 0                  | 0                   |
| <b>seq401</b>  | Firmicutes    | Clostridia   | 0                  | 0                   | 0                  | 0                   |
| <b>seq506</b>  | Firmicutes    | Clostridia   | 0                  | 0                   | 0                  | 0                   |
| <b>seq540</b>  | Firmicutes    | Clostridia   | 0                  | 0                   | 0                  | 0                   |
| <b>seq596</b>  | Firmicutes    | Clostridia   | 0                  | 0                   | 0                  | 0                   |
| <b>seq638</b>  | Firmicutes    | Clostridia   | 0                  | 0                   | 0                  | 0                   |
| <b>seq724</b>  | Firmicutes    | Clostridia   | 0                  | 0                   | 0                  | 0                   |
| <b>seq741</b>  | Firmicutes    | Clostridia   | 0                  | 0                   | 0                  | 0                   |
| <b>seq900</b>  | Firmicutes    | Clostridia   | 0                  | 0                   | 0                  | 0                   |
| <b>seq902</b>  | Firmicutes    | Clostridia   | 0                  | 0                   | 0                  | 0                   |
| <b>seq917</b>  | Firmicutes    | Clostridia   | 0                  | 0                   | 0                  | 0                   |
| <b>seq1009</b> | Firmicutes    | Clostridia   | 0                  | 0                   | 0                  | 0                   |
| <b>seq1049</b> | Firmicutes    | Clostridia   | 0                  | 0                   | 0                  | 0                   |
| <b>seq1086</b> | Firmicutes    | Clostridia   | 0                  | 0                   | 0                  | 0                   |
| <b>seq1125</b> | Firmicutes    | Clostridia   | 0                  | 0                   | 0                  | 0                   |
| <b>seq1252</b> | Firmicutes    | Clostridia   | 0                  | 0                   | 0                  | 0                   |
| <b>seq1278</b> | Firmicutes    | Clostridia   | 0                  | 0                   | 0                  | 0                   |
| <b>seq1307</b> | Firmicutes    | Clostridia   | 0                  | 0                   | 0                  | 0                   |
| <b>seq1310</b> | Firmicutes    | Clostridia   | 0                  | 0                   | 0                  | 0                   |
| <b>seq1315</b> | Firmicutes    | Clostridia   | 0                  | 0                   | 0                  | 0                   |
| <b>seq1391</b> | Firmicutes    | Clostridia   | 0                  | 0                   | 0                  | 0                   |
| <b>seq1399</b> | Firmicutes    | Clostridia   | 0                  | 0                   | 0                  | 0                   |
| <b>seq1408</b> | Firmicutes    | Clostridia   | 0                  | 0                   | 0                  | 0                   |
| <b>seq1424</b> | Firmicutes    | Clostridia   | 0                  | 0                   | 0                  | 0                   |

Sequence Count Table

|                | <b>Phylum</b> | <b>Class</b> | <b>Subject4WK0</b> | <b>Subject4WK12</b> | <b>Subject5WK0</b> | <b>Subject5WK12</b> |
|----------------|---------------|--------------|--------------------|---------------------|--------------------|---------------------|
| <b>seq652</b>  | Firmicutes    | Clostridia   | 0                  | 0                   | 0                  | 0                   |
| <b>seq1464</b> | Firmicutes    | Clostridia   | 0                  | 0                   | 0                  | 0                   |
| <b>seq510</b>  | Firmicutes    | Clostridia   | 0                  | 0                   | 0                  | 0                   |
| <b>seq986</b>  | Firmicutes    | Clostridia   | 0                  | 0                   | 0                  | 0                   |
| <b>seq1150</b> | Firmicutes    | Clostridia   | 0                  | 0                   | 0                  | 0                   |
| <b>seq1158</b> | Firmicutes    | Clostridia   | 0                  | 0                   | 0                  | 0                   |
| <b>seq1280</b> | Firmicutes    | Clostridia   | 0                  | 0                   | 0                  | 0                   |
| <b>seq1840</b> | Firmicutes    | Clostridia   | 0                  | 0                   | 0                  | 0                   |
| <b>seq367</b>  | Firmicutes    | Clostridia   | 0                  | 0                   | 0                  | 0                   |
| <b>seq401</b>  | Firmicutes    | Clostridia   | 0                  | 0                   | 0                  | 0                   |
| <b>seq506</b>  | Firmicutes    | Clostridia   | 13                 | 18                  | 0                  | 0                   |
| <b>seq540</b>  | Firmicutes    | Clostridia   | 0                  | 0                   | 0                  | 0                   |
| <b>seq596</b>  | Firmicutes    | Clostridia   | 0                  | 0                   | 0                  | 0                   |
| <b>seq638</b>  | Firmicutes    | Clostridia   | 6                  | 0                   | 0                  | 0                   |
| <b>seq724</b>  | Firmicutes    | Clostridia   | 0                  | 0                   | 0                  | 0                   |
| <b>seq741</b>  | Firmicutes    | Clostridia   | 0                  | 0                   | 0                  | 0                   |
| <b>seq900</b>  | Firmicutes    | Clostridia   | 0                  | 0                   | 0                  | 0                   |
| <b>seq902</b>  | Firmicutes    | Clostridia   | 0                  | 0                   | 0                  | 0                   |
| <b>seq917</b>  | Firmicutes    | Clostridia   | 29                 | 0                   | 0                  | 0                   |
| <b>seq1009</b> | Firmicutes    | Clostridia   | 0                  | 0                   | 0                  | 0                   |
| <b>seq1049</b> | Firmicutes    | Clostridia   | 0                  | 0                   | 0                  | 0                   |
| <b>seq1086</b> | Firmicutes    | Clostridia   | 0                  | 0                   | 0                  | 0                   |
| <b>seq1125</b> | Firmicutes    | Clostridia   | 0                  | 0                   | 0                  | 0                   |
| <b>seq1252</b> | Firmicutes    | Clostridia   | 0                  | 0                   | 0                  | 0                   |
| <b>seq1278</b> | Firmicutes    | Clostridia   | 0                  | 0                   | 0                  | 0                   |
| <b>seq1307</b> | Firmicutes    | Clostridia   | 0                  | 0                   | 0                  | 0                   |
| <b>seq1310</b> | Firmicutes    | Clostridia   | 3                  | 0                   | 0                  | 0                   |
| <b>seq1315</b> | Firmicutes    | Clostridia   | 0                  | 0                   | 0                  | 0                   |
| <b>seq1391</b> | Firmicutes    | Clostridia   | 0                  | 0                   | 0                  | 0                   |
| <b>seq1399</b> | Firmicutes    | Clostridia   | 0                  | 0                   | 0                  | 0                   |
| <b>seq1408</b> | Firmicutes    | Clostridia   | 0                  | 0                   | 0                  | 0                   |
| <b>seq1424</b> | Firmicutes    | Clostridia   | 0                  | 0                   | 0                  | 0                   |

Sequence Count Table

|                | <b>Phylum</b> | <b>Class</b> | <b>Subject6WK0</b> | <b>Subject6WK12</b> | <b>Subject18WK0</b> | <b>Subject18WK12</b> |
|----------------|---------------|--------------|--------------------|---------------------|---------------------|----------------------|
| <b>seq652</b>  | Firmicutes    | Clostridia   | 0                  | 0                   | 0                   | 0                    |
| <b>seq1464</b> | Firmicutes    | Clostridia   | 0                  | 0                   | 0                   | 0                    |
| <b>seq510</b>  | Firmicutes    | Clostridia   | 35                 | 32                  | 0                   | 0                    |
| <b>seq986</b>  | Firmicutes    | Clostridia   | 0                  | 0                   | 0                   | 0                    |
| <b>seq1150</b> | Firmicutes    | Clostridia   | 9                  | 0                   | 0                   | 0                    |
| <b>seq1158</b> | Firmicutes    | Clostridia   | 0                  | 0                   | 0                   | 0                    |
| <b>seq1280</b> | Firmicutes    | Clostridia   | 0                  | 0                   | 0                   | 0                    |
| <b>seq1840</b> | Firmicutes    | Clostridia   | 0                  | 0                   | 0                   | 0                    |
| <b>seq367</b>  | Firmicutes    | Clostridia   | 171                | 102                 | 0                   | 0                    |
| <b>seq401</b>  | Firmicutes    | Clostridia   | 0                  | 0                   | 0                   | 0                    |
| <b>seq506</b>  | Firmicutes    | Clostridia   | 0                  | 0                   | 0                   | 0                    |
| <b>seq540</b>  | Firmicutes    | Clostridia   | 256                | 403                 | 0                   | 0                    |
| <b>seq596</b>  | Firmicutes    | Clostridia   | 96                 | 174                 | 0                   | 0                    |
| <b>seq638</b>  | Firmicutes    | Clostridia   | 16                 | 21                  | 0                   | 0                    |
| <b>seq724</b>  | Firmicutes    | Clostridia   | 0                  | 0                   | 0                   | 0                    |
| <b>seq741</b>  | Firmicutes    | Clostridia   | 0                  | 0                   | 0                   | 0                    |
| <b>seq900</b>  | Firmicutes    | Clostridia   | 0                  | 0                   | 0                   | 0                    |
| <b>seq902</b>  | Firmicutes    | Clostridia   | 0                  | 0                   | 0                   | 0                    |
| <b>seq917</b>  | Firmicutes    | Clostridia   | 0                  | 0                   | 0                   | 0                    |
| <b>seq1009</b> | Firmicutes    | Clostridia   | 23                 | 0                   | 0                   | 0                    |
| <b>seq1049</b> | Firmicutes    | Clostridia   | 16                 | 0                   | 0                   | 0                    |
| <b>seq1086</b> | Firmicutes    | Clostridia   | 0                  | 0                   | 0                   | 0                    |
| <b>seq1125</b> | Firmicutes    | Clostridia   | 0                  | 0                   | 0                   | 0                    |
| <b>seq1252</b> | Firmicutes    | Clostridia   | 0                  | 0                   | 0                   | 0                    |
| <b>seq1278</b> | Firmicutes    | Clostridia   | 0                  | 4                   | 0                   | 0                    |
| <b>seq1307</b> | Firmicutes    | Clostridia   | 0                  | 0                   | 0                   | 0                    |
| <b>seq1310</b> | Firmicutes    | Clostridia   | 0                  | 0                   | 0                   | 0                    |
| <b>seq1315</b> | Firmicutes    | Clostridia   | 24                 | 30                  | 0                   | 0                    |
| <b>seq1391</b> | Firmicutes    | Clostridia   | 0                  | 0                   | 0                   | 0                    |
| <b>seq1399</b> | Firmicutes    | Clostridia   | 11                 | 22                  | 0                   | 0                    |
| <b>seq1408</b> | Firmicutes    | Clostridia   | 0                  | 0                   | 0                   | 0                    |
| <b>seq1424</b> | Firmicutes    | Clostridia   | 5                  | 21                  | 0                   | 0                    |

Sequence Count Table

|                | <b>Phylum</b> | <b>Class</b> | <b>Subject19WK0</b> | <b>Subject19WK12</b> | <b>Subject20WK0</b> | <b>Subject20WK12</b> |
|----------------|---------------|--------------|---------------------|----------------------|---------------------|----------------------|
| <b>seq652</b>  | Firmicutes    | Clostridia   | 0                   | 0                    | 316                 | 142                  |
| <b>seq1464</b> | Firmicutes    | Clostridia   | 0                   | 0                    | 0                   | 0                    |
| <b>seq510</b>  | Firmicutes    | Clostridia   | 75                  | 30                   | 25                  | 84                   |
| <b>seq986</b>  | Firmicutes    | Clostridia   | 0                   | 0                    | 0                   | 0                    |
| <b>seq1150</b> | Firmicutes    | Clostridia   | 0                   | 0                    | 0                   | 0                    |
| <b>seq1158</b> | Firmicutes    | Clostridia   | 0                   | 0                    | 4                   | 0                    |
| <b>seq1280</b> | Firmicutes    | Clostridia   | 0                   | 0                    | 26                  | 35                   |
| <b>seq1840</b> | Firmicutes    | Clostridia   | 0                   | 0                    | 0                   | 0                    |
| <b>seq367</b>  | Firmicutes    | Clostridia   | 0                   | 0                    | 112                 | 54                   |
| <b>seq401</b>  | Firmicutes    | Clostridia   | 0                   | 0                    | 0                   | 0                    |
| <b>seq506</b>  | Firmicutes    | Clostridia   | 0                   | 0                    | 0                   | 0                    |
| <b>seq540</b>  | Firmicutes    | Clostridia   | 0                   | 0                    | 0                   | 0                    |
| <b>seq596</b>  | Firmicutes    | Clostridia   | 0                   | 0                    | 20                  | 0                    |
| <b>seq638</b>  | Firmicutes    | Clostridia   | 0                   | 0                    | 14                  | 21                   |
| <b>seq724</b>  | Firmicutes    | Clostridia   | 0                   | 0                    | 0                   | 0                    |
| <b>seq741</b>  | Firmicutes    | Clostridia   | 0                   | 0                    | 0                   | 0                    |
| <b>seq900</b>  | Firmicutes    | Clostridia   | 0                   | 0                    | 102                 | 20                   |
| <b>seq902</b>  | Firmicutes    | Clostridia   | 0                   | 0                    | 111                 | 59                   |
| <b>seq917</b>  | Firmicutes    | Clostridia   | 0                   | 0                    | 0                   | 0                    |
| <b>seq1009</b> | Firmicutes    | Clostridia   | 0                   | 0                    | 0                   | 0                    |
| <b>seq1049</b> | Firmicutes    | Clostridia   | 0                   | 0                    | 15                  | 0                    |
| <b>seq1086</b> | Firmicutes    | Clostridia   | 0                   | 0                    | 0                   | 0                    |
| <b>seq1125</b> | Firmicutes    | Clostridia   | 0                   | 0                    | 0                   | 0                    |
| <b>seq1252</b> | Firmicutes    | Clostridia   | 0                   | 0                    | 0                   | 0                    |
| <b>seq1278</b> | Firmicutes    | Clostridia   | 0                   | 0                    | 0                   | 0                    |
| <b>seq1307</b> | Firmicutes    | Clostridia   | 0                   | 0                    | 27                  | 28                   |
| <b>seq1310</b> | Firmicutes    | Clostridia   | 0                   | 0                    | 0                   | 0                    |
| <b>seq1315</b> | Firmicutes    | Clostridia   | 0                   | 0                    | 0                   | 0                    |
| <b>seq1391</b> | Firmicutes    | Clostridia   | 0                   | 0                    | 0                   | 0                    |
| <b>seq1399</b> | Firmicutes    | Clostridia   | 0                   | 0                    | 0                   | 8                    |
| <b>seq1408</b> | Firmicutes    | Clostridia   | 0                   | 0                    | 10                  | 10                   |
| <b>seq1424</b> | Firmicutes    | Clostridia   | 0                   | 0                    | 0                   | 0                    |

Sequence Count Table

|                | <b>Phylum</b> | <b>Class</b> | <b>Subject7WK0</b> | <b>Subject7WK12</b> | <b>Subject21WK0</b> | <b>Subject21WK12</b> |
|----------------|---------------|--------------|--------------------|---------------------|---------------------|----------------------|
| <b>seq652</b>  | Firmicutes    | Clostridia   | 0                  | 0                   | 0                   | 0                    |
| <b>seq1464</b> | Firmicutes    | Clostridia   | 0                  | 0                   | 0                   | 0                    |
| <b>seq510</b>  | Firmicutes    | Clostridia   | 48                 | 0                   | 0                   | 0                    |
| <b>seq986</b>  | Firmicutes    | Clostridia   | 0                  | 0                   | 0                   | 0                    |
| <b>seq1150</b> | Firmicutes    | Clostridia   | 0                  | 0                   | 0                   | 0                    |
| <b>seq1158</b> | Firmicutes    | Clostridia   | 0                  | 0                   | 0                   | 0                    |
| <b>seq1280</b> | Firmicutes    | Clostridia   | 0                  | 0                   | 0                   | 0                    |
| <b>seq1840</b> | Firmicutes    | Clostridia   | 0                  | 0                   | 0                   | 0                    |
| <b>seq367</b>  | Firmicutes    | Clostridia   | 0                  | 0                   | 0                   | 0                    |
| <b>seq401</b>  | Firmicutes    | Clostridia   | 0                  | 0                   | 0                   | 0                    |
| <b>seq506</b>  | Firmicutes    | Clostridia   | 0                  | 0                   | 0                   | 0                    |
| <b>seq540</b>  | Firmicutes    | Clostridia   | 0                  | 0                   | 0                   | 0                    |
| <b>seq596</b>  | Firmicutes    | Clostridia   | 0                  | 0                   | 0                   | 0                    |
| <b>seq638</b>  | Firmicutes    | Clostridia   | 0                  | 0                   | 0                   | 0                    |
| <b>seq724</b>  | Firmicutes    | Clostridia   | 0                  | 0                   | 0                   | 0                    |
| <b>seq741</b>  | Firmicutes    | Clostridia   | 0                  | 0                   | 0                   | 0                    |
| <b>seq900</b>  | Firmicutes    | Clostridia   | 0                  | 0                   | 0                   | 0                    |
| <b>seq902</b>  | Firmicutes    | Clostridia   | 0                  | 0                   | 0                   | 0                    |
| <b>seq917</b>  | Firmicutes    | Clostridia   | 0                  | 0                   | 0                   | 0                    |
| <b>seq1009</b> | Firmicutes    | Clostridia   | 0                  | 0                   | 0                   | 0                    |
| <b>seq1049</b> | Firmicutes    | Clostridia   | 0                  | 0                   | 0                   | 0                    |
| <b>seq1086</b> | Firmicutes    | Clostridia   | 0                  | 0                   | 0                   | 0                    |
| <b>seq1125</b> | Firmicutes    | Clostridia   | 0                  | 0                   | 0                   | 0                    |
| <b>seq1252</b> | Firmicutes    | Clostridia   | 0                  | 0                   | 0                   | 0                    |
| <b>seq1278</b> | Firmicutes    | Clostridia   | 0                  | 0                   | 0                   | 0                    |
| <b>seq1307</b> | Firmicutes    | Clostridia   | 0                  | 0                   | 0                   | 0                    |
| <b>seq1310</b> | Firmicutes    | Clostridia   | 0                  | 0                   | 0                   | 0                    |
| <b>seq1315</b> | Firmicutes    | Clostridia   | 0                  | 0                   | 0                   | 0                    |
| <b>seq1391</b> | Firmicutes    | Clostridia   | 0                  | 0                   | 0                   | 0                    |
| <b>seq1399</b> | Firmicutes    | Clostridia   | 0                  | 0                   | 0                   | 0                    |
| <b>seq1408</b> | Firmicutes    | Clostridia   | 0                  | 0                   | 0                   | 0                    |
| <b>seq1424</b> | Firmicutes    | Clostridia   | 0                  | 0                   | 0                   | 0                    |



Sequence Count Table

|                | <b>Phylum</b> | <b>Class</b> | <b>Subject8WK0</b> | <b>Subject8WK12</b> | <b>Subject9WK0</b> | <b>Subject9WK12</b> |
|----------------|---------------|--------------|--------------------|---------------------|--------------------|---------------------|
| <b>seq652</b>  | Firmicutes    | Clostridia   | 0                  | 0                   | 0                  | 0                   |
| <b>seq1464</b> | Firmicutes    | Clostridia   | 0                  | 0                   | 0                  | 0                   |
| <b>seq510</b>  | Firmicutes    | Clostridia   | 0                  | 0                   | 0                  | 0                   |
| <b>seq986</b>  | Firmicutes    | Clostridia   | 0                  | 0                   | 0                  | 0                   |
| <b>seq1150</b> | Firmicutes    | Clostridia   | 0                  | 0                   | 0                  | 0                   |
| <b>seq1158</b> | Firmicutes    | Clostridia   | 0                  | 0                   | 0                  | 0                   |
| <b>seq1280</b> | Firmicutes    | Clostridia   | 0                  | 0                   | 0                  | 0                   |
| <b>seq1840</b> | Firmicutes    | Clostridia   | 0                  | 0                   | 0                  | 0                   |
| <b>seq367</b>  | Firmicutes    | Clostridia   | 0                  | 0                   | 0                  | 0                   |
| <b>seq401</b>  | Firmicutes    | Clostridia   | 0                  | 0                   | 0                  | 0                   |
| <b>seq506</b>  | Firmicutes    | Clostridia   | 0                  | 0                   | 0                  | 0                   |
| <b>seq540</b>  | Firmicutes    | Clostridia   | 0                  | 0                   | 0                  | 0                   |
| <b>seq596</b>  | Firmicutes    | Clostridia   | 0                  | 0                   | 0                  | 0                   |
| <b>seq638</b>  | Firmicutes    | Clostridia   | 0                  | 0                   | 0                  | 0                   |
| <b>seq724</b>  | Firmicutes    | Clostridia   | 0                  | 0                   | 0                  | 0                   |
| <b>seq741</b>  | Firmicutes    | Clostridia   | 0                  | 0                   | 0                  | 0                   |
| <b>seq900</b>  | Firmicutes    | Clostridia   | 0                  | 0                   | 0                  | 0                   |
| <b>seq902</b>  | Firmicutes    | Clostridia   | 0                  | 0                   | 0                  | 0                   |
| <b>seq917</b>  | Firmicutes    | Clostridia   | 0                  | 0                   | 0                  | 0                   |
| <b>seq1009</b> | Firmicutes    | Clostridia   | 0                  | 0                   | 0                  | 0                   |
| <b>seq1049</b> | Firmicutes    | Clostridia   | 0                  | 0                   | 0                  | 0                   |
| <b>seq1086</b> | Firmicutes    | Clostridia   | 0                  | 0                   | 0                  | 0                   |
| <b>seq1125</b> | Firmicutes    | Clostridia   | 0                  | 0                   | 0                  | 0                   |
| <b>seq1252</b> | Firmicutes    | Clostridia   | 0                  | 0                   | 0                  | 0                   |
| <b>seq1278</b> | Firmicutes    | Clostridia   | 0                  | 0                   | 0                  | 0                   |
| <b>seq1307</b> | Firmicutes    | Clostridia   | 0                  | 0                   | 0                  | 0                   |
| <b>seq1310</b> | Firmicutes    | Clostridia   | 0                  | 0                   | 0                  | 0                   |
| <b>seq1315</b> | Firmicutes    | Clostridia   | 0                  | 0                   | 0                  | 0                   |
| <b>seq1391</b> | Firmicutes    | Clostridia   | 0                  | 0                   | 0                  | 0                   |
| <b>seq1399</b> | Firmicutes    | Clostridia   | 0                  | 0                   | 0                  | 0                   |
| <b>seq1408</b> | Firmicutes    | Clostridia   | 0                  | 0                   | 0                  | 0                   |
| <b>seq1424</b> | Firmicutes    | Clostridia   | 0                  | 0                   | 0                  | 0                   |

Sequence Count Table

|                | <b>Phylum</b> | <b>Class</b> | <b>Subject10WK0</b> | <b>Subject10WK12</b> | <b>Subject22WK0</b> | <b>Subject22WK12</b> |
|----------------|---------------|--------------|---------------------|----------------------|---------------------|----------------------|
| <b>seq652</b>  | Firmicutes    | Clostridia   | 0                   | 0                    | 0                   | 0                    |
| <b>seq1464</b> | Firmicutes    | Clostridia   | 0                   | 0                    | 0                   | 0                    |
| <b>seq510</b>  | Firmicutes    | Clostridia   | 0                   | 0                    | 156                 | 29                   |
| <b>seq986</b>  | Firmicutes    | Clostridia   | 0                   | 0                    | 0                   | 0                    |
| <b>seq1150</b> | Firmicutes    | Clostridia   | 0                   | 0                    | 59                  | 24                   |
| <b>seq1158</b> | Firmicutes    | Clostridia   | 0                   | 0                    | 43                  | 20                   |
| <b>seq1280</b> | Firmicutes    | Clostridia   | 0                   | 0                    | 0                   | 0                    |
| <b>seq1840</b> | Firmicutes    | Clostridia   | 0                   | 0                    | 0                   | 0                    |
| <b>seq367</b>  | Firmicutes    | Clostridia   | 0                   | 0                    | 0                   | 0                    |
| <b>seq401</b>  | Firmicutes    | Clostridia   | 0                   | 0                    | 0                   | 0                    |
| <b>seq506</b>  | Firmicutes    | Clostridia   | 0                   | 0                    | 0                   | 0                    |
| <b>seq540</b>  | Firmicutes    | Clostridia   | 0                   | 0                    | 0                   | 0                    |
| <b>seq596</b>  | Firmicutes    | Clostridia   | 0                   | 0                    | 123                 | 88                   |
| <b>seq638</b>  | Firmicutes    | Clostridia   | 0                   | 0                    | 16                  | 32                   |
| <b>seq724</b>  | Firmicutes    | Clostridia   | 0                   | 0                    | 90                  | 235                  |
| <b>seq741</b>  | Firmicutes    | Clostridia   | 0                   | 0                    | 168                 | 158                  |
| <b>seq900</b>  | Firmicutes    | Clostridia   | 0                   | 0                    | 0                   | 0                    |
| <b>seq902</b>  | Firmicutes    | Clostridia   | 0                   | 0                    | 0                   | 0                    |
| <b>seq917</b>  | Firmicutes    | Clostridia   | 0                   | 0                    | 0                   | 0                    |
| <b>seq1009</b> | Firmicutes    | Clostridia   | 0                   | 0                    | 0                   | 0                    |
| <b>seq1049</b> | Firmicutes    | Clostridia   | 0                   | 0                    | 70                  | 24                   |
| <b>seq1086</b> | Firmicutes    | Clostridia   | 0                   | 0                    | 0                   | 0                    |
| <b>seq1125</b> | Firmicutes    | Clostridia   | 0                   | 0                    | 0                   | 0                    |
| <b>seq1252</b> | Firmicutes    | Clostridia   | 0                   | 0                    | 55                  | 12                   |
| <b>seq1278</b> | Firmicutes    | Clostridia   | 0                   | 0                    | 6                   | 0                    |
| <b>seq1307</b> | Firmicutes    | Clostridia   | 0                   | 0                    | 0                   | 0                    |
| <b>seq1310</b> | Firmicutes    | Clostridia   | 0                   | 0                    | 0                   | 0                    |
| <b>seq1315</b> | Firmicutes    | Clostridia   | 0                   | 0                    | 0                   | 0                    |
| <b>seq1391</b> | Firmicutes    | Clostridia   | 0                   | 0                    | 0                   | 0                    |
| <b>seq1399</b> | Firmicutes    | Clostridia   | 0                   | 0                    | 0                   | 0                    |
| <b>seq1408</b> | Firmicutes    | Clostridia   | 0                   | 0                    | 7                   | 9                    |
| <b>seq1424</b> | Firmicutes    | Clostridia   | 0                   | 0                    | 0                   | 12                   |

Sequence Count Table

|                | <b>Phylum</b> | <b>Class</b> | <b>Subject23WK0</b> | <b>Subject23WK12</b> | <b>Subject24WK0</b> | <b>Subject24WK12</b> |
|----------------|---------------|--------------|---------------------|----------------------|---------------------|----------------------|
| <b>seq652</b>  | Firmicutes    | Clostridia   | 0                   | 0                    | 0                   | 0                    |
| <b>seq1464</b> | Firmicutes    | Clostridia   | 7                   | 13                   | 0                   | 0                    |
| <b>seq510</b>  | Firmicutes    | Clostridia   | 0                   | 0                    | 17                  | 60                   |
| <b>seq986</b>  | Firmicutes    | Clostridia   | 0                   | 38                   | 0                   | 0                    |
| <b>seq1150</b> | Firmicutes    | Clostridia   | 0                   | 0                    | 0                   | 0                    |
| <b>seq1158</b> | Firmicutes    | Clostridia   | 0                   | 0                    | 0                   | 0                    |
| <b>seq1280</b> | Firmicutes    | Clostridia   | 0                   | 0                    | 0                   | 0                    |
| <b>seq1840</b> | Firmicutes    | Clostridia   | 0                   | 0                    | 0                   | 0                    |
| <b>seq367</b>  | Firmicutes    | Clostridia   | 66                  | 170                  | 152                 | 184                  |
| <b>seq401</b>  | Firmicutes    | Clostridia   | 0                   | 0                    | 0                   | 0                    |
| <b>seq506</b>  | Firmicutes    | Clostridia   | 14                  | 58                   | 28                  | 0                    |
| <b>seq540</b>  | Firmicutes    | Clostridia   | 0                   | 0                    | 0                   | 0                    |
| <b>seq596</b>  | Firmicutes    | Clostridia   | 0                   | 36                   | 0                   | 0                    |
| <b>seq638</b>  | Firmicutes    | Clostridia   | 0                   | 15                   | 119                 | 24                   |
| <b>seq724</b>  | Firmicutes    | Clostridia   | 0                   | 0                    | 0                   | 0                    |
| <b>seq741</b>  | Firmicutes    | Clostridia   | 0                   | 0                    | 0                   | 0                    |
| <b>seq900</b>  | Firmicutes    | Clostridia   | 0                   | 0                    | 0                   | 0                    |
| <b>seq902</b>  | Firmicutes    | Clostridia   | 0                   | 0                    | 0                   | 0                    |
| <b>seq917</b>  | Firmicutes    | Clostridia   | 0                   | 0                    | 0                   | 0                    |
| <b>seq1009</b> | Firmicutes    | Clostridia   | 0                   | 0                    | 0                   | 0                    |
| <b>seq1049</b> | Firmicutes    | Clostridia   | 0                   | 0                    | 0                   | 0                    |
| <b>seq1086</b> | Firmicutes    | Clostridia   | 0                   | 0                    | 0                   | 0                    |
| <b>seq1125</b> | Firmicutes    | Clostridia   | 0                   | 0                    | 0                   | 0                    |
| <b>seq1252</b> | Firmicutes    | Clostridia   | 0                   | 0                    | 0                   | 0                    |
| <b>seq1278</b> | Firmicutes    | Clostridia   | 0                   | 0                    | 0                   | 8                    |
| <b>seq1307</b> | Firmicutes    | Clostridia   | 0                   | 0                    | 0                   | 0                    |
| <b>seq1310</b> | Firmicutes    | Clostridia   | 0                   | 0                    | 9                   | 25                   |
| <b>seq1315</b> | Firmicutes    | Clostridia   | 0                   | 0                    | 0                   | 0                    |
| <b>seq1391</b> | Firmicutes    | Clostridia   | 0                   | 0                    | 0                   | 0                    |
| <b>seq1399</b> | Firmicutes    | Clostridia   | 0                   | 0                    | 0                   | 0                    |
| <b>seq1408</b> | Firmicutes    | Clostridia   | 0                   | 0                    | 0                   | 0                    |
| <b>seq1424</b> | Firmicutes    | Clostridia   | 0                   | 0                    | 0                   | 0                    |

Sequence Count Table

|                | <b>Phylum</b> | <b>Class</b> | <b>Subject11WK0</b> | <b>Subject11WK12</b> | <b>Subject12WK0</b> | <b>Subject12WK12</b> |
|----------------|---------------|--------------|---------------------|----------------------|---------------------|----------------------|
| <b>seq652</b>  | Firmicutes    | Clostridia   | 0                   | 0                    | 0                   | 0                    |
| <b>seq1464</b> | Firmicutes    | Clostridia   | 0                   | 0                    | 0                   | 0                    |
| <b>seq510</b>  | Firmicutes    | Clostridia   | 0                   | 0                    | 0                   | 0                    |
| <b>seq986</b>  | Firmicutes    | Clostridia   | 0                   | 0                    | 0                   | 0                    |
| <b>seq1150</b> | Firmicutes    | Clostridia   | 0                   | 0                    | 0                   | 0                    |
| <b>seq1158</b> | Firmicutes    | Clostridia   | 0                   | 0                    | 0                   | 0                    |
| <b>seq1280</b> | Firmicutes    | Clostridia   | 0                   | 0                    | 0                   | 0                    |
| <b>seq1840</b> | Firmicutes    | Clostridia   | 0                   | 0                    | 0                   | 0                    |
| <b>seq367</b>  | Firmicutes    | Clostridia   | 0                   | 0                    | 0                   | 0                    |
| <b>seq401</b>  | Firmicutes    | Clostridia   | 0                   | 0                    | 0                   | 0                    |
| <b>seq506</b>  | Firmicutes    | Clostridia   | 0                   | 0                    | 31                  | 0                    |
| <b>seq540</b>  | Firmicutes    | Clostridia   | 0                   | 0                    | 0                   | 0                    |
| <b>seq596</b>  | Firmicutes    | Clostridia   | 0                   | 0                    | 0                   | 0                    |
| <b>seq638</b>  | Firmicutes    | Clostridia   | 0                   | 0                    | 11                  | 9                    |
| <b>seq724</b>  | Firmicutes    | Clostridia   | 0                   | 0                    | 0                   | 0                    |
| <b>seq741</b>  | Firmicutes    | Clostridia   | 0                   | 0                    | 0                   | 0                    |
| <b>seq900</b>  | Firmicutes    | Clostridia   | 0                   | 0                    | 0                   | 0                    |
| <b>seq902</b>  | Firmicutes    | Clostridia   | 0                   | 0                    | 0                   | 0                    |
| <b>seq917</b>  | Firmicutes    | Clostridia   | 0                   | 0                    | 0                   | 0                    |
| <b>seq1009</b> | Firmicutes    | Clostridia   | 0                   | 0                    | 0                   | 0                    |
| <b>seq1049</b> | Firmicutes    | Clostridia   | 0                   | 0                    | 0                   | 0                    |
| <b>seq1086</b> | Firmicutes    | Clostridia   | 0                   | 0                    | 0                   | 0                    |
| <b>seq1125</b> | Firmicutes    | Clostridia   | 0                   | 0                    | 0                   | 0                    |
| <b>seq1252</b> | Firmicutes    | Clostridia   | 0                   | 0                    | 0                   | 0                    |
| <b>seq1278</b> | Firmicutes    | Clostridia   | 0                   | 0                    | 0                   | 0                    |
| <b>seq1307</b> | Firmicutes    | Clostridia   | 0                   | 0                    | 0                   | 0                    |
| <b>seq1310</b> | Firmicutes    | Clostridia   | 0                   | 0                    | 0                   | 0                    |
| <b>seq1315</b> | Firmicutes    | Clostridia   | 0                   | 0                    | 0                   | 0                    |
| <b>seq1391</b> | Firmicutes    | Clostridia   | 0                   | 0                    | 0                   | 0                    |
| <b>seq1399</b> | Firmicutes    | Clostridia   | 0                   | 0                    | 0                   | 0                    |
| <b>seq1408</b> | Firmicutes    | Clostridia   | 0                   | 0                    | 0                   | 0                    |
| <b>seq1424</b> | Firmicutes    | Clostridia   | 0                   | 0                    | 0                   | 0                    |

Sequence Count Table

|                | <b>Phylum</b> | <b>Class</b> | <b>Subject25WK0</b> | <b>Subject25WK12</b> | <b>Subject38WK0</b> | <b>Subject38WK12</b> |
|----------------|---------------|--------------|---------------------|----------------------|---------------------|----------------------|
| <b>seq652</b>  | Firmicutes    | Clostridia   | 0                   | 0                    | 0                   | 0                    |
| <b>seq1464</b> | Firmicutes    | Clostridia   | 0                   | 0                    | 0                   | 0                    |
| <b>seq510</b>  | Firmicutes    | Clostridia   | 0                   | 0                    | 0                   | 0                    |
| <b>seq986</b>  | Firmicutes    | Clostridia   | 8                   | 0                    | 0                   | 0                    |
| <b>seq1150</b> | Firmicutes    | Clostridia   | 0                   | 0                    | 0                   | 0                    |
| <b>seq1158</b> | Firmicutes    | Clostridia   | 0                   | 0                    | 0                   | 0                    |
| <b>seq1280</b> | Firmicutes    | Clostridia   | 0                   | 0                    | 0                   | 0                    |
| <b>seq1840</b> | Firmicutes    | Clostridia   | 0                   | 0                    | 0                   | 0                    |
| <b>seq367</b>  | Firmicutes    | Clostridia   | 40                  | 0                    | 0                   | 0                    |
| <b>seq401</b>  | Firmicutes    | Clostridia   | 0                   | 0                    | 0                   | 0                    |
| <b>seq506</b>  | Firmicutes    | Clostridia   | 0                   | 0                    | 0                   | 0                    |
| <b>seq540</b>  | Firmicutes    | Clostridia   | 0                   | 0                    | 0                   | 0                    |
| <b>seq596</b>  | Firmicutes    | Clostridia   | 0                   | 0                    | 0                   | 0                    |
| <b>seq638</b>  | Firmicutes    | Clostridia   | 0                   | 0                    | 0                   | 0                    |
| <b>seq724</b>  | Firmicutes    | Clostridia   | 0                   | 0                    | 0                   | 0                    |
| <b>seq741</b>  | Firmicutes    | Clostridia   | 0                   | 0                    | 0                   | 0                    |
| <b>seq900</b>  | Firmicutes    | Clostridia   | 0                   | 0                    | 0                   | 0                    |
| <b>seq902</b>  | Firmicutes    | Clostridia   | 0                   | 0                    | 0                   | 0                    |
| <b>seq917</b>  | Firmicutes    | Clostridia   | 0                   | 0                    | 0                   | 0                    |
| <b>seq1009</b> | Firmicutes    | Clostridia   | 0                   | 0                    | 0                   | 0                    |
| <b>seq1049</b> | Firmicutes    | Clostridia   | 0                   | 0                    | 0                   | 0                    |
| <b>seq1086</b> | Firmicutes    | Clostridia   | 0                   | 0                    | 0                   | 0                    |
| <b>seq1125</b> | Firmicutes    | Clostridia   | 0                   | 0                    | 0                   | 0                    |
| <b>seq1252</b> | Firmicutes    | Clostridia   | 0                   | 0                    | 0                   | 0                    |
| <b>seq1278</b> | Firmicutes    | Clostridia   | 0                   | 0                    | 0                   | 0                    |
| <b>seq1307</b> | Firmicutes    | Clostridia   | 0                   | 0                    | 0                   | 0                    |
| <b>seq1310</b> | Firmicutes    | Clostridia   | 0                   | 0                    | 0                   | 0                    |
| <b>seq1315</b> | Firmicutes    | Clostridia   | 0                   | 0                    | 0                   | 0                    |
| <b>seq1391</b> | Firmicutes    | Clostridia   | 0                   | 0                    | 0                   | 0                    |
| <b>seq1399</b> | Firmicutes    | Clostridia   | 0                   | 0                    | 0                   | 0                    |
| <b>seq1408</b> | Firmicutes    | Clostridia   | 0                   | 0                    | 0                   | 0                    |
| <b>seq1424</b> | Firmicutes    | Clostridia   | 0                   | 0                    | 0                   | 0                    |

Sequence Count Table

|                | <b>Phylum</b> | <b>Class</b> | <b>Subject31WK0</b> | <b>Subject31WK12</b> | <b>Subject32WK0</b> | <b>Subject32WK12</b> |
|----------------|---------------|--------------|---------------------|----------------------|---------------------|----------------------|
| <b>seq652</b>  | Firmicutes    | Clostridia   | 0                   | 0                    | 0                   | 0                    |
| <b>seq1464</b> | Firmicutes    | Clostridia   | 0                   | 0                    | 0                   | 0                    |
| <b>seq510</b>  | Firmicutes    | Clostridia   | 0                   | 0                    | 0                   | 0                    |
| <b>seq986</b>  | Firmicutes    | Clostridia   | 0                   | 0                    | 0                   | 0                    |
| <b>seq1150</b> | Firmicutes    | Clostridia   | 0                   | 0                    | 0                   | 0                    |
| <b>seq1158</b> | Firmicutes    | Clostridia   | 0                   | 0                    | 0                   | 0                    |
| <b>seq1280</b> | Firmicutes    | Clostridia   | 0                   | 0                    | 0                   | 0                    |
| <b>seq1840</b> | Firmicutes    | Clostridia   | 0                   | 0                    | 0                   | 0                    |
| <b>seq367</b>  | Firmicutes    | Clostridia   | 0                   | 0                    | 0                   | 0                    |
| <b>seq401</b>  | Firmicutes    | Clostridia   | 0                   | 0                    | 0                   | 0                    |
| <b>seq506</b>  | Firmicutes    | Clostridia   | 0                   | 0                    | 0                   | 0                    |
| <b>seq540</b>  | Firmicutes    | Clostridia   | 0                   | 0                    | 0                   | 0                    |
| <b>seq596</b>  | Firmicutes    | Clostridia   | 0                   | 0                    | 0                   | 0                    |
| <b>seq638</b>  | Firmicutes    | Clostridia   | 0                   | 0                    | 0                   | 0                    |
| <b>seq724</b>  | Firmicutes    | Clostridia   | 0                   | 0                    | 0                   | 0                    |
| <b>seq741</b>  | Firmicutes    | Clostridia   | 0                   | 0                    | 0                   | 0                    |
| <b>seq900</b>  | Firmicutes    | Clostridia   | 0                   | 0                    | 0                   | 0                    |
| <b>seq902</b>  | Firmicutes    | Clostridia   | 0                   | 0                    | 0                   | 0                    |
| <b>seq917</b>  | Firmicutes    | Clostridia   | 0                   | 0                    | 0                   | 0                    |
| <b>seq1009</b> | Firmicutes    | Clostridia   | 0                   | 0                    | 0                   | 0                    |
| <b>seq1049</b> | Firmicutes    | Clostridia   | 0                   | 0                    | 0                   | 0                    |
| <b>seq1086</b> | Firmicutes    | Clostridia   | 0                   | 0                    | 0                   | 0                    |
| <b>seq1125</b> | Firmicutes    | Clostridia   | 0                   | 0                    | 0                   | 0                    |
| <b>seq1252</b> | Firmicutes    | Clostridia   | 0                   | 0                    | 0                   | 0                    |
| <b>seq1278</b> | Firmicutes    | Clostridia   | 0                   | 0                    | 0                   | 0                    |
| <b>seq1307</b> | Firmicutes    | Clostridia   | 0                   | 0                    | 0                   | 0                    |
| <b>seq1310</b> | Firmicutes    | Clostridia   | 0                   | 0                    | 0                   | 0                    |
| <b>seq1315</b> | Firmicutes    | Clostridia   | 0                   | 0                    | 0                   | 0                    |
| <b>seq1391</b> | Firmicutes    | Clostridia   | 0                   | 0                    | 0                   | 0                    |
| <b>seq1399</b> | Firmicutes    | Clostridia   | 0                   | 0                    | 0                   | 0                    |
| <b>seq1408</b> | Firmicutes    | Clostridia   | 0                   | 0                    | 0                   | 0                    |
| <b>seq1424</b> | Firmicutes    | Clostridia   | 0                   | 0                    | 0                   | 0                    |

Sequence Count Table

|                | <b>Phylum</b> | <b>Class</b> | <b>Subject13WK0</b> | <b>Subject13WK12</b> | <b>Subject39WK0</b> | <b>Subject39WK12</b> |
|----------------|---------------|--------------|---------------------|----------------------|---------------------|----------------------|
| <b>seq652</b>  | Firmicutes    | Clostridia   | 0                   | 0                    | 0                   | 0                    |
| <b>seq1464</b> | Firmicutes    | Clostridia   | 0                   | 0                    | 0                   | 0                    |
| <b>seq510</b>  | Firmicutes    | Clostridia   | 0                   | 0                    | 0                   | 0                    |
| <b>seq986</b>  | Firmicutes    | Clostridia   | 13                  | 0                    | 0                   | 0                    |
| <b>seq1150</b> | Firmicutes    | Clostridia   | 0                   | 0                    | 0                   | 0                    |
| <b>seq1158</b> | Firmicutes    | Clostridia   | 15                  | 9                    | 0                   | 0                    |
| <b>seq1280</b> | Firmicutes    | Clostridia   | 0                   | 0                    | 0                   | 0                    |
| <b>seq1840</b> | Firmicutes    | Clostridia   | 0                   | 6                    | 0                   | 0                    |
| <b>seq367</b>  | Firmicutes    | Clostridia   | 186                 | 89                   | 0                   | 0                    |
| <b>seq401</b>  | Firmicutes    | Clostridia   | 472                 | 767                  | 0                   | 0                    |
| <b>seq506</b>  | Firmicutes    | Clostridia   | 201                 | 170                  | 0                   | 0                    |
| <b>seq540</b>  | Firmicutes    | Clostridia   | 0                   | 0                    | 0                   | 0                    |
| <b>seq596</b>  | Firmicutes    | Clostridia   | 0                   | 0                    | 0                   | 0                    |
| <b>seq638</b>  | Firmicutes    | Clostridia   | 16                  | 30                   | 0                   | 0                    |
| <b>seq724</b>  | Firmicutes    | Clostridia   | 20                  | 0                    | 0                   | 0                    |
| <b>seq741</b>  | Firmicutes    | Clostridia   | 0                   | 0                    | 0                   | 0                    |
| <b>seq900</b>  | Firmicutes    | Clostridia   | 0                   | 0                    | 0                   | 0                    |
| <b>seq902</b>  | Firmicutes    | Clostridia   | 0                   | 0                    | 0                   | 0                    |
| <b>seq917</b>  | Firmicutes    | Clostridia   | 86                  | 70                   | 0                   | 0                    |
| <b>seq1009</b> | Firmicutes    | Clostridia   | 0                   | 0                    | 0                   | 0                    |
| <b>seq1049</b> | Firmicutes    | Clostridia   | 0                   | 0                    | 0                   | 0                    |
| <b>seq1086</b> | Firmicutes    | Clostridia   | 9                   | 101                  | 0                   | 0                    |
| <b>seq1125</b> | Firmicutes    | Clostridia   | 0                   | 0                    | 0                   | 0                    |
| <b>seq1252</b> | Firmicutes    | Clostridia   | 0                   | 0                    | 0                   | 0                    |
| <b>seq1278</b> | Firmicutes    | Clostridia   | 17                  | 5                    | 0                   | 0                    |
| <b>seq1307</b> | Firmicutes    | Clostridia   | 0                   | 0                    | 0                   | 0                    |
| <b>seq1310</b> | Firmicutes    | Clostridia   | 0                   | 0                    | 0                   | 0                    |
| <b>seq1315</b> | Firmicutes    | Clostridia   | 0                   | 0                    | 0                   | 0                    |
| <b>seq1391</b> | Firmicutes    | Clostridia   | 0                   | 0                    | 0                   | 0                    |
| <b>seq1399</b> | Firmicutes    | Clostridia   | 0                   | 0                    | 0                   | 0                    |
| <b>seq1408</b> | Firmicutes    | Clostridia   | 0                   | 4                    | 0                   | 0                    |
| <b>seq1424</b> | Firmicutes    | Clostridia   | 0                   | 0                    | 0                   | 0                    |

Sequence Count Table

|                | <b>Phylum</b> | <b>Class</b> | <b>Subject26WK0</b> | <b>Subject26WK12</b> | <b>Subject14WK0</b> | <b>Subject14WK12</b> |
|----------------|---------------|--------------|---------------------|----------------------|---------------------|----------------------|
| <b>seq652</b>  | Firmicutes    | Clostridia   | 0                   | 0                    | 0                   | 0                    |
| <b>seq1464</b> | Firmicutes    | Clostridia   | 0                   | 0                    | 0                   | 0                    |
| <b>seq510</b>  | Firmicutes    | Clostridia   | 0                   | 0                    | 0                   | 0                    |
| <b>seq986</b>  | Firmicutes    | Clostridia   | 0                   | 0                    | 74                  | 15                   |
| <b>seq1150</b> | Firmicutes    | Clostridia   | 0                   | 0                    | 0                   | 0                    |
| <b>seq1158</b> | Firmicutes    | Clostridia   | 0                   | 0                    | 0                   | 0                    |
| <b>seq1280</b> | Firmicutes    | Clostridia   | 0                   | 0                    | 0                   | 0                    |
| <b>seq1840</b> | Firmicutes    | Clostridia   | 0                   | 0                    | 0                   | 0                    |
| <b>seq367</b>  | Firmicutes    | Clostridia   | 0                   | 0                    | 0                   | 0                    |
| <b>seq401</b>  | Firmicutes    | Clostridia   | 0                   | 0                    | 0                   | 0                    |
| <b>seq506</b>  | Firmicutes    | Clostridia   | 0                   | 0                    | 0                   | 0                    |
| <b>seq540</b>  | Firmicutes    | Clostridia   | 0                   | 0                    | 0                   | 0                    |
| <b>seq596</b>  | Firmicutes    | Clostridia   | 0                   | 0                    | 0                   | 0                    |
| <b>seq638</b>  | Firmicutes    | Clostridia   | 0                   | 0                    | 19                  | 29                   |
| <b>seq724</b>  | Firmicutes    | Clostridia   | 0                   | 0                    | 0                   | 0                    |
| <b>seq741</b>  | Firmicutes    | Clostridia   | 0                   | 0                    | 0                   | 0                    |
| <b>seq900</b>  | Firmicutes    | Clostridia   | 0                   | 0                    | 0                   | 0                    |
| <b>seq902</b>  | Firmicutes    | Clostridia   | 0                   | 0                    | 0                   | 0                    |
| <b>seq917</b>  | Firmicutes    | Clostridia   | 0                   | 0                    | 0                   | 0                    |
| <b>seq1009</b> | Firmicutes    | Clostridia   | 0                   | 0                    | 16                  | 100                  |
| <b>seq1049</b> | Firmicutes    | Clostridia   | 0                   | 0                    | 0                   | 0                    |
| <b>seq1086</b> | Firmicutes    | Clostridia   | 0                   | 0                    | 0                   | 0                    |
| <b>seq1125</b> | Firmicutes    | Clostridia   | 0                   | 0                    | 0                   | 0                    |
| <b>seq1252</b> | Firmicutes    | Clostridia   | 0                   | 0                    | 0                   | 0                    |
| <b>seq1278</b> | Firmicutes    | Clostridia   | 0                   | 0                    | 0                   | 0                    |
| <b>seq1307</b> | Firmicutes    | Clostridia   | 0                   | 0                    | 0                   | 0                    |
| <b>seq1310</b> | Firmicutes    | Clostridia   | 0                   | 0                    | 5                   | 0                    |
| <b>seq1315</b> | Firmicutes    | Clostridia   | 0                   | 0                    | 0                   | 0                    |
| <b>seq1391</b> | Firmicutes    | Clostridia   | 0                   | 0                    | 0                   | 0                    |
| <b>seq1399</b> | Firmicutes    | Clostridia   | 0                   | 0                    | 0                   | 0                    |
| <b>seq1408</b> | Firmicutes    | Clostridia   | 0                   | 0                    | 0                   | 0                    |
| <b>seq1424</b> | Firmicutes    | Clostridia   | 0                   | 0                    | 0                   | 0                    |



Sequence Count Table

|                | <b>Phylum</b> | <b>Class</b> | <b>Subject27WK0</b> | <b>Subject27WK12</b> | <b>Subject15WK0</b> | <b>Subject15WK12</b> |
|----------------|---------------|--------------|---------------------|----------------------|---------------------|----------------------|
| <b>seq652</b>  | Firmicutes    | Clostridia   | 0                   | 0                    | 0                   | 0                    |
| <b>seq1464</b> | Firmicutes    | Clostridia   | 0                   | 0                    | 0                   | 0                    |
| <b>seq510</b>  | Firmicutes    | Clostridia   | 0                   | 29                   | 0                   | 0                    |
| <b>seq986</b>  | Firmicutes    | Clostridia   | 0                   | 0                    | 0                   | 0                    |
| <b>seq1150</b> | Firmicutes    | Clostridia   | 0                   | 0                    | 0                   | 0                    |
| <b>seq1158</b> | Firmicutes    | Clostridia   | 0                   | 0                    | 0                   | 0                    |
| <b>seq1280</b> | Firmicutes    | Clostridia   | 0                   | 0                    | 0                   | 0                    |
| <b>seq1840</b> | Firmicutes    | Clostridia   | 0                   | 0                    | 0                   | 0                    |
| <b>seq367</b>  | Firmicutes    | Clostridia   | 0                   | 0                    | 0                   | 0                    |
| <b>seq401</b>  | Firmicutes    | Clostridia   | 0                   | 0                    | 0                   | 0                    |
| <b>seq506</b>  | Firmicutes    | Clostridia   | 101                 | 83                   | 0                   | 0                    |
| <b>seq540</b>  | Firmicutes    | Clostridia   | 0                   | 0                    | 0                   | 0                    |
| <b>seq596</b>  | Firmicutes    | Clostridia   | 0                   | 0                    | 0                   | 0                    |
| <b>seq638</b>  | Firmicutes    | Clostridia   | 0                   | 0                    | 0                   | 0                    |
| <b>seq724</b>  | Firmicutes    | Clostridia   | 0                   | 0                    | 0                   | 0                    |
| <b>seq741</b>  | Firmicutes    | Clostridia   | 0                   | 0                    | 0                   | 0                    |
| <b>seq900</b>  | Firmicutes    | Clostridia   | 0                   | 0                    | 0                   | 0                    |
| <b>seq902</b>  | Firmicutes    | Clostridia   | 0                   | 0                    | 0                   | 0                    |
| <b>seq917</b>  | Firmicutes    | Clostridia   | 0                   | 0                    | 0                   | 0                    |
| <b>seq1009</b> | Firmicutes    | Clostridia   | 0                   | 0                    | 0                   | 0                    |
| <b>seq1049</b> | Firmicutes    | Clostridia   | 0                   | 0                    | 0                   | 0                    |
| <b>seq1086</b> | Firmicutes    | Clostridia   | 0                   | 0                    | 0                   | 0                    |
| <b>seq1125</b> | Firmicutes    | Clostridia   | 26                  | 73                   | 0                   | 0                    |
| <b>seq1252</b> | Firmicutes    | Clostridia   | 0                   | 0                    | 0                   | 0                    |
| <b>seq1278</b> | Firmicutes    | Clostridia   | 0                   | 0                    | 0                   | 0                    |
| <b>seq1307</b> | Firmicutes    | Clostridia   | 0                   | 0                    | 0                   | 0                    |
| <b>seq1310</b> | Firmicutes    | Clostridia   | 0                   | 0                    | 0                   | 0                    |
| <b>seq1315</b> | Firmicutes    | Clostridia   | 0                   | 0                    | 0                   | 0                    |
| <b>seq1391</b> | Firmicutes    | Clostridia   | 0                   | 0                    | 0                   | 0                    |
| <b>seq1399</b> | Firmicutes    | Clostridia   | 0                   | 0                    | 0                   | 0                    |
| <b>seq1408</b> | Firmicutes    | Clostridia   | 0                   | 0                    | 0                   | 0                    |
| <b>seq1424</b> | Firmicutes    | Clostridia   | 0                   | 0                    | 0                   | 0                    |

Sequence Count Table

|                | <b>Phylum</b> | <b>Class</b> | <b>Δ</b> |  |  |  |
|----------------|---------------|--------------|----------|--|--|--|
| <b>seq652</b>  | Firmicutes    | Clostridia   |          |  |  |  |
| <b>seq1464</b> | Firmicutes    | Clostridia   |          |  |  |  |
| <b>seq510</b>  | Firmicutes    | Clostridia   |          |  |  |  |
| <b>seq986</b>  | Firmicutes    | Clostridia   |          |  |  |  |
| <b>seq1150</b> | Firmicutes    | Clostridia   |          |  |  |  |
| <b>seq1158</b> | Firmicutes    | Clostridia   |          |  |  |  |
| <b>seq1280</b> | Firmicutes    | Clostridia   |          |  |  |  |
| <b>seq1840</b> | Firmicutes    | Clostridia   |          |  |  |  |
| <b>seq367</b>  | Firmicutes    | Clostridia   |          |  |  |  |
| <b>seq401</b>  | Firmicutes    | Clostridia   |          |  |  |  |
| <b>seq506</b>  | Firmicutes    | Clostridia   |          |  |  |  |
| <b>seq540</b>  | Firmicutes    | Clostridia   |          |  |  |  |
| <b>seq596</b>  | Firmicutes    | Clostridia   |          |  |  |  |
| <b>seq638</b>  | Firmicutes    | Clostridia   |          |  |  |  |
| <b>seq724</b>  | Firmicutes    | Clostridia   |          |  |  |  |
| <b>seq741</b>  | Firmicutes    | Clostridia   |          |  |  |  |
| <b>seq900</b>  | Firmicutes    | Clostridia   |          |  |  |  |
| <b>seq902</b>  | Firmicutes    | Clostridia   |          |  |  |  |
| <b>seq917</b>  | Firmicutes    | Clostridia   |          |  |  |  |
| <b>seq1009</b> | Firmicutes    | Clostridia   |          |  |  |  |
| <b>seq1049</b> | Firmicutes    | Clostridia   |          |  |  |  |
| <b>seq1086</b> | Firmicutes    | Clostridia   |          |  |  |  |
| <b>seq1125</b> | Firmicutes    | Clostridia   |          |  |  |  |
| <b>seq1252</b> | Firmicutes    | Clostridia   |          |  |  |  |
| <b>seq1278</b> | Firmicutes    | Clostridia   |          |  |  |  |
| <b>seq1307</b> | Firmicutes    | Clostridia   |          |  |  |  |
| <b>seq1310</b> | Firmicutes    | Clostridia   |          |  |  |  |
| <b>seq1315</b> | Firmicutes    | Clostridia   |          |  |  |  |
| <b>seq1391</b> | Firmicutes    | Clostridia   |          |  |  |  |
| <b>seq1399</b> | Firmicutes    | Clostridia   |          |  |  |  |
| <b>seq1408</b> | Firmicutes    | Clostridia   |          |  |  |  |
| <b>seq1424</b> | Firmicutes    | Clostridia   |          |  |  |  |

Sequence Count Table

|                | <b>Phylum</b> | <b>Class</b> | <b>Order</b>  | <b>Family</b>   |
|----------------|---------------|--------------|---------------|-----------------|
| <b>seq1432</b> | Firmicutes    | Clostridia   | Clostridiales | Ruminococcaceae |
| <b>seq1475</b> | Firmicutes    | Clostridia   | Clostridiales | Ruminococcaceae |
| <b>seq1507</b> | Firmicutes    | Clostridia   | Clostridiales | Ruminococcaceae |
| <b>seq1554</b> | Firmicutes    | Clostridia   | Clostridiales | Ruminococcaceae |
| <b>seq1561</b> | Firmicutes    | Clostridia   | Clostridiales | Ruminococcaceae |
| <b>seq1685</b> | Firmicutes    | Clostridia   | Clostridiales | Ruminococcaceae |
| <b>seq1745</b> | Firmicutes    | Clostridia   | Clostridiales | Ruminococcaceae |
| <b>seq1762</b> | Firmicutes    | Clostridia   | Clostridiales | Ruminococcaceae |
| <b>seq1765</b> | Firmicutes    | Clostridia   | Clostridiales | Ruminococcaceae |
| <b>seq1778</b> | Firmicutes    | Clostridia   | Clostridiales | Ruminococcaceae |
| <b>seq1793</b> | Firmicutes    | Clostridia   | Clostridiales | Ruminococcaceae |
| <b>seq1813</b> | Firmicutes    | Clostridia   | Clostridiales | Ruminococcaceae |
| <b>seq1814</b> | Firmicutes    | Clostridia   | Clostridiales | Ruminococcaceae |
| <b>seq1857</b> | Firmicutes    | Clostridia   | Clostridiales | Ruminococcaceae |
| <b>seq1859</b> | Firmicutes    | Clostridia   | Clostridiales | Ruminococcaceae |
| <b>seq1339</b> | Firmicutes    | Clostridia   | Clostridiales | Ruminococcaceae |
| <b>seq1504</b> | Firmicutes    | Clostridia   | Clostridiales | Ruminococcaceae |
| <b>seq1512</b> | Firmicutes    | Clostridia   | Clostridiales | Ruminococcaceae |
| <b>seq64</b>   | Firmicutes    | Clostridia   | Clostridiales | Ruminococcaceae |
| <b>seq200</b>  | Firmicutes    | Clostridia   | Clostridiales | Ruminococcaceae |
| <b>seq619</b>  | Firmicutes    | Clostridia   | Clostridiales | Ruminococcaceae |
| <b>seq753</b>  | Firmicutes    | Clostridia   | Clostridiales | Ruminococcaceae |
| <b>seq849</b>  | Firmicutes    | Clostridia   | Clostridiales | Ruminococcaceae |
| <b>seq948</b>  | Firmicutes    | Clostridia   | Clostridiales | Ruminococcaceae |
| <b>seq1061</b> | Firmicutes    | Clostridia   | Clostridiales | Ruminococcaceae |
| <b>seq1092</b> | Firmicutes    | Clostridia   | Clostridiales | Ruminococcaceae |
| <b>seq1213</b> | Firmicutes    | Clostridia   | Clostridiales | Ruminococcaceae |
| <b>seq1375</b> | Firmicutes    | Clostridia   | Clostridiales | Ruminococcaceae |
| <b>seq1400</b> | Firmicutes    | Clostridia   | Clostridiales | Ruminococcaceae |
| <b>seq1429</b> | Firmicutes    | Clostridia   | Clostridiales | Ruminococcaceae |
| <b>seq1474</b> | Firmicutes    | Clostridia   | Clostridiales | Ruminococcaceae |
| <b>seq1545</b> | Firmicutes    | Clostridia   | Clostridiales | Ruminococcaceae |

Sequence Count Table

|                | <b>Phylum</b> | <b>Class</b> | <b>Genus</b>            | <b>Species</b> |
|----------------|---------------|--------------|-------------------------|----------------|
| <b>seq1432</b> | Firmicutes    | Clostridia   | Ruminococcaceae_UCG-010 |                |
| <b>seq1475</b> | Firmicutes    | Clostridia   | Ruminococcaceae_UCG-010 |                |
| <b>seq1507</b> | Firmicutes    | Clostridia   | Ruminococcaceae_UCG-010 |                |
| <b>seq1554</b> | Firmicutes    | Clostridia   | Ruminococcaceae_UCG-010 |                |
| <b>seq1561</b> | Firmicutes    | Clostridia   | Ruminococcaceae_UCG-010 |                |
| <b>seq1685</b> | Firmicutes    | Clostridia   | Ruminococcaceae_UCG-010 |                |
| <b>seq1745</b> | Firmicutes    | Clostridia   | Ruminococcaceae_UCG-010 |                |
| <b>seq1762</b> | Firmicutes    | Clostridia   | Ruminococcaceae_UCG-010 |                |
| <b>seq1765</b> | Firmicutes    | Clostridia   | Ruminococcaceae_UCG-010 |                |
| <b>seq1778</b> | Firmicutes    | Clostridia   | Ruminococcaceae_UCG-010 |                |
| <b>seq1793</b> | Firmicutes    | Clostridia   | Ruminococcaceae_UCG-010 |                |
| <b>seq1813</b> | Firmicutes    | Clostridia   | Ruminococcaceae_UCG-010 |                |
| <b>seq1814</b> | Firmicutes    | Clostridia   | Ruminococcaceae_UCG-010 |                |
| <b>seq1857</b> | Firmicutes    | Clostridia   | Ruminococcaceae_UCG-010 |                |
| <b>seq1859</b> | Firmicutes    | Clostridia   | Ruminococcaceae_UCG-010 |                |
| <b>seq1339</b> | Firmicutes    | Clostridia   | Ruminococcaceae_UCG-011 |                |
| <b>seq1504</b> | Firmicutes    | Clostridia   | Ruminococcaceae_UCG-011 |                |
| <b>seq1512</b> | Firmicutes    | Clostridia   | Ruminococcaceae_UCG-011 |                |
| <b>seq64</b>   | Firmicutes    | Clostridia   | Ruminococcaceae_UCG-013 |                |
| <b>seq200</b>  | Firmicutes    | Clostridia   | Ruminococcaceae_UCG-013 |                |
| <b>seq619</b>  | Firmicutes    | Clostridia   | Ruminococcaceae_UCG-013 |                |
| <b>seq753</b>  | Firmicutes    | Clostridia   | Ruminococcaceae_UCG-013 |                |
| <b>seq849</b>  | Firmicutes    | Clostridia   | Ruminococcaceae_UCG-013 |                |
| <b>seq948</b>  | Firmicutes    | Clostridia   | Ruminococcaceae_UCG-013 |                |
| <b>seq1061</b> | Firmicutes    | Clostridia   | Ruminococcaceae_UCG-013 |                |
| <b>seq1092</b> | Firmicutes    | Clostridia   | Ruminococcaceae_UCG-013 |                |
| <b>seq1213</b> | Firmicutes    | Clostridia   | Ruminococcaceae_UCG-013 |                |
| <b>seq1375</b> | Firmicutes    | Clostridia   | Ruminococcaceae_UCG-013 |                |
| <b>seq1400</b> | Firmicutes    | Clostridia   | Ruminococcaceae_UCG-013 |                |
| <b>seq1429</b> | Firmicutes    | Clostridia   | Ruminococcaceae_UCG-013 |                |
| <b>seq1474</b> | Firmicutes    | Clostridia   | Ruminococcaceae_UCG-013 |                |
| <b>seq1545</b> | Firmicutes    | Clostridia   | Ruminococcaceae_UCG-013 |                |

Sequence Count Table

|                | <b>Phylum</b> | <b>Class</b> | <b>Subject34WK0</b> | <b>Subject34WK12</b> | <b>Subject16WK0</b> | <b>Subject16WK12</b> |
|----------------|---------------|--------------|---------------------|----------------------|---------------------|----------------------|
| <b>seq1432</b> | Firmicutes    | Clostridia   | 0                   | 0                    | 0                   | 0                    |
| <b>seq1475</b> | Firmicutes    | Clostridia   | 0                   | 0                    | 0                   | 0                    |
| <b>seq1507</b> | Firmicutes    | Clostridia   | 0                   | 0                    | 0                   | 0                    |
| <b>seq1554</b> | Firmicutes    | Clostridia   | 0                   | 0                    | 0                   | 0                    |
| <b>seq1561</b> | Firmicutes    | Clostridia   | 0                   | 0                    | 0                   | 0                    |
| <b>seq1685</b> | Firmicutes    | Clostridia   | 0                   | 0                    | 0                   | 0                    |
| <b>seq1745</b> | Firmicutes    | Clostridia   | 0                   | 0                    | 0                   | 0                    |
| <b>seq1762</b> | Firmicutes    | Clostridia   | 0                   | 0                    | 0                   | 9                    |
| <b>seq1765</b> | Firmicutes    | Clostridia   | 0                   | 0                    | 0                   | 0                    |
| <b>seq1778</b> | Firmicutes    | Clostridia   | 0                   | 0                    | 0                   | 0                    |
| <b>seq1793</b> | Firmicutes    | Clostridia   | 0                   | 0                    | 0                   | 0                    |
| <b>seq1813</b> | Firmicutes    | Clostridia   | 0                   | 0                    | 0                   | 0                    |
| <b>seq1814</b> | Firmicutes    | Clostridia   | 0                   | 0                    | 0                   | 0                    |
| <b>seq1857</b> | Firmicutes    | Clostridia   | 0                   | 0                    | 0                   | 0                    |
| <b>seq1859</b> | Firmicutes    | Clostridia   | 0                   | 0                    | 0                   | 0                    |
| <b>seq1339</b> | Firmicutes    | Clostridia   | 0                   | 0                    | 0                   | 0                    |
| <b>seq1504</b> | Firmicutes    | Clostridia   | 0                   | 0                    | 0                   | 0                    |
| <b>seq1512</b> | Firmicutes    | Clostridia   | 0                   | 0                    | 0                   | 0                    |
| <b>seq64</b>   | Firmicutes    | Clostridia   | 6                   | 105                  | 296                 | 0                    |
| <b>seq200</b>  | Firmicutes    | Clostridia   | 0                   | 0                    | 0                   | 0                    |
| <b>seq619</b>  | Firmicutes    | Clostridia   | 0                   | 0                    | 0                   | 0                    |
| <b>seq753</b>  | Firmicutes    | Clostridia   | 0                   | 0                    | 0                   | 0                    |
| <b>seq849</b>  | Firmicutes    | Clostridia   | 0                   | 0                    | 0                   | 0                    |
| <b>seq948</b>  | Firmicutes    | Clostridia   | 0                   | 0                    | 0                   | 0                    |
| <b>seq1061</b> | Firmicutes    | Clostridia   | 0                   | 0                    | 119                 | 0                    |
| <b>seq1092</b> | Firmicutes    | Clostridia   | 0                   | 0                    | 0                   | 108                  |
| <b>seq1213</b> | Firmicutes    | Clostridia   | 0                   | 0                    | 0                   | 0                    |
| <b>seq1375</b> | Firmicutes    | Clostridia   | 0                   | 0                    | 0                   | 0                    |
| <b>seq1400</b> | Firmicutes    | Clostridia   | 0                   | 0                    | 0                   | 0                    |
| <b>seq1429</b> | Firmicutes    | Clostridia   | 0                   | 0                    | 0                   | 0                    |
| <b>seq1474</b> | Firmicutes    | Clostridia   | 0                   | 0                    | 0                   | 0                    |
| <b>seq1545</b> | Firmicutes    | Clostridia   | 0                   | 0                    | 0                   | 0                    |

Sequence Count Table

|                | <b>Phylum</b> | <b>Class</b> | <b>Subject17WK0</b> | <b>Subject17WK12</b> | <b>Subject1WK0</b> | <b>Subject1WK12</b> |
|----------------|---------------|--------------|---------------------|----------------------|--------------------|---------------------|
| <b>seq1432</b> | Firmicutes    | Clostridia   | 0                   | 0                    | 0                  | 0                   |
| <b>seq1475</b> | Firmicutes    | Clostridia   | 0                   | 0                    | 0                  | 0                   |
| <b>seq1507</b> | Firmicutes    | Clostridia   | 0                   | 0                    | 0                  | 0                   |
| <b>seq1554</b> | Firmicutes    | Clostridia   | 0                   | 0                    | 0                  | 0                   |
| <b>seq1561</b> | Firmicutes    | Clostridia   | 0                   | 0                    | 0                  | 0                   |
| <b>seq1685</b> | Firmicutes    | Clostridia   | 0                   | 0                    | 0                  | 0                   |
| <b>seq1745</b> | Firmicutes    | Clostridia   | 0                   | 0                    | 0                  | 0                   |
| <b>seq1762</b> | Firmicutes    | Clostridia   | 0                   | 0                    | 0                  | 0                   |
| <b>seq1765</b> | Firmicutes    | Clostridia   | 0                   | 0                    | 0                  | 0                   |
| <b>seq1778</b> | Firmicutes    | Clostridia   | 0                   | 0                    | 0                  | 0                   |
| <b>seq1793</b> | Firmicutes    | Clostridia   | 0                   | 0                    | 0                  | 0                   |
| <b>seq1813</b> | Firmicutes    | Clostridia   | 0                   | 0                    | 0                  | 0                   |
| <b>seq1814</b> | Firmicutes    | Clostridia   | 0                   | 0                    | 0                  | 0                   |
| <b>seq1857</b> | Firmicutes    | Clostridia   | 0                   | 0                    | 0                  | 0                   |
| <b>seq1859</b> | Firmicutes    | Clostridia   | 0                   | 0                    | 0                  | 0                   |
| <b>seq1339</b> | Firmicutes    | Clostridia   | 0                   | 0                    | 0                  | 0                   |
| <b>seq1504</b> | Firmicutes    | Clostridia   | 0                   | 0                    | 0                  | 0                   |
| <b>seq1512</b> | Firmicutes    | Clostridia   | 0                   | 0                    | 0                  | 0                   |
| <b>seq64</b>   | Firmicutes    | Clostridia   | 214                 | 643                  | 1437               | 1778                |
| <b>seq200</b>  | Firmicutes    | Clostridia   | 194                 | 107                  | 170                | 206                 |
| <b>seq619</b>  | Firmicutes    | Clostridia   | 0                   | 0                    | 0                  | 0                   |
| <b>seq753</b>  | Firmicutes    | Clostridia   | 0                   | 0                    | 0                  | 0                   |
| <b>seq849</b>  | Firmicutes    | Clostridia   | 0                   | 0                    | 0                  | 0                   |
| <b>seq948</b>  | Firmicutes    | Clostridia   | 0                   | 0                    | 0                  | 0                   |
| <b>seq1061</b> | Firmicutes    | Clostridia   | 0                   | 0                    | 0                  | 0                   |
| <b>seq1092</b> | Firmicutes    | Clostridia   | 0                   | 0                    | 0                  | 0                   |
| <b>seq1213</b> | Firmicutes    | Clostridia   | 0                   | 0                    | 0                  | 0                   |
| <b>seq1375</b> | Firmicutes    | Clostridia   | 0                   | 0                    | 0                  | 0                   |
| <b>seq1400</b> | Firmicutes    | Clostridia   | 0                   | 0                    | 0                  | 0                   |
| <b>seq1429</b> | Firmicutes    | Clostridia   | 0                   | 0                    | 0                  | 0                   |
| <b>seq1474</b> | Firmicutes    | Clostridia   | 0                   | 0                    | 0                  | 0                   |
| <b>seq1545</b> | Firmicutes    | Clostridia   | 0                   | 0                    | 0                  | 0                   |

Sequence Count Table

|                | <b>Phylum</b> | <b>Class</b> | <b>Subject2WK0</b> | <b>Subject2WK12</b> | <b>Subject3WK0</b> | <b>Subject3WK12</b> |
|----------------|---------------|--------------|--------------------|---------------------|--------------------|---------------------|
| <b>seq1432</b> | Firmicutes    | Clostridia   | 0                  | 0                   | 0                  | 0                   |
| <b>seq1475</b> | Firmicutes    | Clostridia   | 0                  | 0                   | 0                  | 0                   |
| <b>seq1507</b> | Firmicutes    | Clostridia   | 0                  | 0                   | 0                  | 0                   |
| <b>seq1554</b> | Firmicutes    | Clostridia   | 0                  | 0                   | 0                  | 0                   |
| <b>seq1561</b> | Firmicutes    | Clostridia   | 0                  | 0                   | 0                  | 0                   |
| <b>seq1685</b> | Firmicutes    | Clostridia   | 0                  | 0                   | 0                  | 0                   |
| <b>seq1745</b> | Firmicutes    | Clostridia   | 0                  | 0                   | 0                  | 0                   |
| <b>seq1762</b> | Firmicutes    | Clostridia   | 0                  | 0                   | 0                  | 0                   |
| <b>seq1765</b> | Firmicutes    | Clostridia   | 0                  | 0                   | 0                  | 0                   |
| <b>seq1778</b> | Firmicutes    | Clostridia   | 0                  | 0                   | 0                  | 0                   |
| <b>seq1793</b> | Firmicutes    | Clostridia   | 0                  | 0                   | 0                  | 0                   |
| <b>seq1813</b> | Firmicutes    | Clostridia   | 0                  | 0                   | 0                  | 0                   |
| <b>seq1814</b> | Firmicutes    | Clostridia   | 0                  | 0                   | 0                  | 0                   |
| <b>seq1857</b> | Firmicutes    | Clostridia   | 0                  | 0                   | 0                  | 0                   |
| <b>seq1859</b> | Firmicutes    | Clostridia   | 0                  | 0                   | 0                  | 0                   |
| <b>seq1339</b> | Firmicutes    | Clostridia   | 0                  | 0                   | 0                  | 0                   |
| <b>seq1504</b> | Firmicutes    | Clostridia   | 0                  | 0                   | 0                  | 0                   |
| <b>seq1512</b> | Firmicutes    | Clostridia   | 0                  | 0                   | 0                  | 0                   |
| <b>seq64</b>   | Firmicutes    | Clostridia   | 297                | 56                  | 865                | 255                 |
| <b>seq200</b>  | Firmicutes    | Clostridia   | 0                  | 0                   | 0                  | 0                   |
| <b>seq619</b>  | Firmicutes    | Clostridia   | 0                  | 0                   | 0                  | 0                   |
| <b>seq753</b>  | Firmicutes    | Clostridia   | 0                  | 0                   | 0                  | 0                   |
| <b>seq849</b>  | Firmicutes    | Clostridia   | 0                  | 0                   | 0                  | 0                   |
| <b>seq948</b>  | Firmicutes    | Clostridia   | 0                  | 0                   | 0                  | 0                   |
| <b>seq1061</b> | Firmicutes    | Clostridia   | 0                  | 0                   | 0                  | 0                   |
| <b>seq1092</b> | Firmicutes    | Clostridia   | 0                  | 0                   | 0                  | 0                   |
| <b>seq1213</b> | Firmicutes    | Clostridia   | 0                  | 0                   | 0                  | 0                   |
| <b>seq1375</b> | Firmicutes    | Clostridia   | 0                  | 0                   | 0                  | 0                   |
| <b>seq1400</b> | Firmicutes    | Clostridia   | 0                  | 0                   | 0                  | 0                   |
| <b>seq1429</b> | Firmicutes    | Clostridia   | 0                  | 0                   | 0                  | 0                   |
| <b>seq1474</b> | Firmicutes    | Clostridia   | 0                  | 0                   | 0                  | 0                   |
| <b>seq1545</b> | Firmicutes    | Clostridia   | 0                  | 0                   | 0                  | 0                   |

Sequence Count Table

|                | <b>Phylum</b> | <b>Class</b> | <b>Subject4WK0</b> | <b>Subject4WK12</b> | <b>Subject5WK0</b> | <b>Subject5WK12</b> |
|----------------|---------------|--------------|--------------------|---------------------|--------------------|---------------------|
| <b>seq1432</b> | Firmicutes    | Clostridia   | 0                  | 0                   | 0                  | 0                   |
| <b>seq1475</b> | Firmicutes    | Clostridia   | 0                  | 0                   | 0                  | 0                   |
| <b>seq1507</b> | Firmicutes    | Clostridia   | 0                  | 0                   | 0                  | 0                   |
| <b>seq1554</b> | Firmicutes    | Clostridia   | 0                  | 0                   | 0                  | 0                   |
| <b>seq1561</b> | Firmicutes    | Clostridia   | 0                  | 0                   | 0                  | 0                   |
| <b>seq1685</b> | Firmicutes    | Clostridia   | 0                  | 0                   | 0                  | 0                   |
| <b>seq1745</b> | Firmicutes    | Clostridia   | 10                 | 0                   | 0                  | 0                   |
| <b>seq1762</b> | Firmicutes    | Clostridia   | 0                  | 0                   | 0                  | 0                   |
| <b>seq1765</b> | Firmicutes    | Clostridia   | 9                  | 0                   | 0                  | 0                   |
| <b>seq1778</b> | Firmicutes    | Clostridia   | 0                  | 0                   | 0                  | 0                   |
| <b>seq1793</b> | Firmicutes    | Clostridia   | 0                  | 0                   | 0                  | 0                   |
| <b>seq1813</b> | Firmicutes    | Clostridia   | 0                  | 0                   | 0                  | 0                   |
| <b>seq1814</b> | Firmicutes    | Clostridia   | 0                  | 0                   | 0                  | 0                   |
| <b>seq1857</b> | Firmicutes    | Clostridia   | 0                  | 0                   | 0                  | 0                   |
| <b>seq1859</b> | Firmicutes    | Clostridia   | 0                  | 0                   | 0                  | 0                   |
| <b>seq1339</b> | Firmicutes    | Clostridia   | 17                 | 0                   | 0                  | 0                   |
| <b>seq1504</b> | Firmicutes    | Clostridia   | 0                  | 0                   | 0                  | 0                   |
| <b>seq1512</b> | Firmicutes    | Clostridia   | 0                  | 0                   | 0                  | 0                   |
| <b>seq64</b>   | Firmicutes    | Clostridia   | 235                | 90                  | 311                | 507                 |
| <b>seq200</b>  | Firmicutes    | Clostridia   | 195                | 59                  | 95                 | 473                 |
| <b>seq619</b>  | Firmicutes    | Clostridia   | 0                  | 0                   | 0                  | 0                   |
| <b>seq753</b>  | Firmicutes    | Clostridia   | 0                  | 0                   | 0                  | 0                   |
| <b>seq849</b>  | Firmicutes    | Clostridia   | 0                  | 0                   | 0                  | 0                   |
| <b>seq948</b>  | Firmicutes    | Clostridia   | 0                  | 0                   | 0                  | 0                   |
| <b>seq1061</b> | Firmicutes    | Clostridia   | 0                  | 0                   | 0                  | 0                   |
| <b>seq1092</b> | Firmicutes    | Clostridia   | 0                  | 0                   | 0                  | 0                   |
| <b>seq1213</b> | Firmicutes    | Clostridia   | 11                 | 59                  | 0                  | 0                   |
| <b>seq1375</b> | Firmicutes    | Clostridia   | 0                  | 0                   | 0                  | 0                   |
| <b>seq1400</b> | Firmicutes    | Clostridia   | 0                  | 0                   | 0                  | 0                   |
| <b>seq1429</b> | Firmicutes    | Clostridia   | 0                  | 0                   | 0                  | 0                   |
| <b>seq1474</b> | Firmicutes    | Clostridia   | 0                  | 0                   | 0                  | 0                   |
| <b>seq1545</b> | Firmicutes    | Clostridia   | 0                  | 0                   | 0                  | 0                   |



Sequence Count Table

|                | <b>Phylum</b> | <b>Class</b> | <b>Subject6WK0</b> | <b>Subject6WK12</b> | <b>Subject18WK0</b> | <b>Subject18WK12</b> |
|----------------|---------------|--------------|--------------------|---------------------|---------------------|----------------------|
| <b>seq1432</b> | Firmicutes    | Clostridia   | 0                  | 0                   | 0                   | 0                    |
| <b>seq1475</b> | Firmicutes    | Clostridia   | 0                  | 0                   | 0                   | 0                    |
| <b>seq1507</b> | Firmicutes    | Clostridia   | 0                  | 0                   | 0                   | 0                    |
| <b>seq1554</b> | Firmicutes    | Clostridia   | 0                  | 0                   | 0                   | 0                    |
| <b>seq1561</b> | Firmicutes    | Clostridia   | 0                  | 0                   | 0                   | 0                    |
| <b>seq1685</b> | Firmicutes    | Clostridia   | 0                  | 0                   | 0                   | 0                    |
| <b>seq1745</b> | Firmicutes    | Clostridia   | 0                  | 0                   | 0                   | 0                    |
| <b>seq1762</b> | Firmicutes    | Clostridia   | 0                  | 0                   | 0                   | 0                    |
| <b>seq1765</b> | Firmicutes    | Clostridia   | 0                  | 0                   | 0                   | 0                    |
| <b>seq1778</b> | Firmicutes    | Clostridia   | 0                  | 0                   | 0                   | 0                    |
| <b>seq1793</b> | Firmicutes    | Clostridia   | 0                  | 0                   | 0                   | 0                    |
| <b>seq1813</b> | Firmicutes    | Clostridia   | 0                  | 0                   | 0                   | 0                    |
| <b>seq1814</b> | Firmicutes    | Clostridia   | 0                  | 0                   | 0                   | 0                    |
| <b>seq1857</b> | Firmicutes    | Clostridia   | 0                  | 0                   | 0                   | 0                    |
| <b>seq1859</b> | Firmicutes    | Clostridia   | 0                  | 0                   | 0                   | 0                    |
| <b>seq1339</b> | Firmicutes    | Clostridia   | 0                  | 0                   | 0                   | 0                    |
| <b>seq1504</b> | Firmicutes    | Clostridia   | 0                  | 0                   | 0                   | 0                    |
| <b>seq1512</b> | Firmicutes    | Clostridia   | 0                  | 0                   | 0                   | 0                    |
| <b>seq64</b>   | Firmicutes    | Clostridia   | 278                | 350                 | 354                 | 187                  |
| <b>seq200</b>  | Firmicutes    | Clostridia   | 0                  | 0                   | 306                 | 160                  |
| <b>seq619</b>  | Firmicutes    | Clostridia   | 0                  | 0                   | 160                 | 90                   |
| <b>seq753</b>  | Firmicutes    | Clostridia   | 0                  | 0                   | 150                 | 73                   |
| <b>seq849</b>  | Firmicutes    | Clostridia   | 26                 | 190                 | 0                   | 0                    |
| <b>seq948</b>  | Firmicutes    | Clostridia   | 0                  | 0                   | 0                   | 0                    |
| <b>seq1061</b> | Firmicutes    | Clostridia   | 0                  | 0                   | 0                   | 0                    |
| <b>seq1092</b> | Firmicutes    | Clostridia   | 0                  | 0                   | 0                   | 0                    |
| <b>seq1213</b> | Firmicutes    | Clostridia   | 0                  | 0                   | 0                   | 0                    |
| <b>seq1375</b> | Firmicutes    | Clostridia   | 0                  | 0                   | 0                   | 0                    |
| <b>seq1400</b> | Firmicutes    | Clostridia   | 0                  | 19                  | 0                   | 0                    |
| <b>seq1429</b> | Firmicutes    | Clostridia   | 0                  | 0                   | 0                   | 0                    |
| <b>seq1474</b> | Firmicutes    | Clostridia   | 17                 | 14                  | 0                   | 0                    |
| <b>seq1545</b> | Firmicutes    | Clostridia   | 0                  | 8                   | 0                   | 0                    |

Sequence Count Table

|                | <b>Phylum</b> | <b>Class</b> | <b>Subject19WK0</b> | <b>Subject19WK12</b> | <b>Subject20WK0</b> | <b>Subject20WK12</b> |
|----------------|---------------|--------------|---------------------|----------------------|---------------------|----------------------|
| <b>seq1432</b> | Firmicutes    | Clostridia   | 0                   | 0                    | 37                  | 0                    |
| <b>seq1475</b> | Firmicutes    | Clostridia   | 0                   | 0                    | 31                  | 0                    |
| <b>seq1507</b> | Firmicutes    | Clostridia   | 0                   | 0                    | 0                   | 0                    |
| <b>seq1554</b> | Firmicutes    | Clostridia   | 0                   | 0                    | 16                  | 7                    |
| <b>seq1561</b> | Firmicutes    | Clostridia   | 0                   | 0                    | 0                   | 0                    |
| <b>seq1685</b> | Firmicutes    | Clostridia   | 0                   | 0                    | 0                   | 0                    |
| <b>seq1745</b> | Firmicutes    | Clostridia   | 0                   | 0                    | 0                   | 0                    |
| <b>seq1762</b> | Firmicutes    | Clostridia   | 0                   | 0                    | 0                   | 0                    |
| <b>seq1765</b> | Firmicutes    | Clostridia   | 0                   | 0                    | 0                   | 0                    |
| <b>seq1778</b> | Firmicutes    | Clostridia   | 0                   | 0                    | 0                   | 0                    |
| <b>seq1793</b> | Firmicutes    | Clostridia   | 0                   | 0                    | 8                   | 0                    |
| <b>seq1813</b> | Firmicutes    | Clostridia   | 0                   | 0                    | 7                   | 0                    |
| <b>seq1814</b> | Firmicutes    | Clostridia   | 0                   | 0                    | 0                   | 0                    |
| <b>seq1857</b> | Firmicutes    | Clostridia   | 0                   | 0                    | 0                   | 0                    |
| <b>seq1859</b> | Firmicutes    | Clostridia   | 0                   | 0                    | 0                   | 0                    |
| <b>seq1339</b> | Firmicutes    | Clostridia   | 0                   | 0                    | 0                   | 0                    |
| <b>seq1504</b> | Firmicutes    | Clostridia   | 0                   | 0                    | 0                   | 0                    |
| <b>seq1512</b> | Firmicutes    | Clostridia   | 0                   | 0                    | 27                  | 0                    |
| <b>seq64</b>   | Firmicutes    | Clostridia   | 0                   | 0                    | 381                 | 534                  |
| <b>seq200</b>  | Firmicutes    | Clostridia   | 0                   | 0                    | 0                   | 0                    |
| <b>seq619</b>  | Firmicutes    | Clostridia   | 0                   | 0                    | 0                   | 0                    |
| <b>seq753</b>  | Firmicutes    | Clostridia   | 0                   | 0                    | 0                   | 0                    |
| <b>seq849</b>  | Firmicutes    | Clostridia   | 0                   | 0                    | 0                   | 0                    |
| <b>seq948</b>  | Firmicutes    | Clostridia   | 0                   | 0                    | 0                   | 0                    |
| <b>seq1061</b> | Firmicutes    | Clostridia   | 0                   | 0                    | 0                   | 0                    |
| <b>seq1092</b> | Firmicutes    | Clostridia   | 0                   | 0                    | 0                   | 0                    |
| <b>seq1213</b> | Firmicutes    | Clostridia   | 0                   | 0                    | 0                   | 0                    |
| <b>seq1375</b> | Firmicutes    | Clostridia   | 0                   | 0                    | 0                   | 0                    |
| <b>seq1400</b> | Firmicutes    | Clostridia   | 0                   | 0                    | 0                   | 0                    |
| <b>seq1429</b> | Firmicutes    | Clostridia   | 0                   | 0                    | 0                   | 0                    |
| <b>seq1474</b> | Firmicutes    | Clostridia   | 0                   | 0                    | 0                   | 0                    |
| <b>seq1545</b> | Firmicutes    | Clostridia   | 0                   | 0                    | 16                  | 0                    |

Sequence Count Table

|                | <b>Phylum</b> | <b>Class</b> | <b>Subject7WK0</b> | <b>Subject7WK12</b> | <b>Subject21WK0</b> | <b>Subject21WK12</b> |
|----------------|---------------|--------------|--------------------|---------------------|---------------------|----------------------|
| <b>seq1432</b> | Firmicutes    | Clostridia   | 0                  | 0                   | 0                   | 0                    |
| <b>seq1475</b> | Firmicutes    | Clostridia   | 0                  | 0                   | 0                   | 0                    |
| <b>seq1507</b> | Firmicutes    | Clostridia   | 0                  | 0                   | 0                   | 0                    |
| <b>seq1554</b> | Firmicutes    | Clostridia   | 0                  | 0                   | 0                   | 0                    |
| <b>seq1561</b> | Firmicutes    | Clostridia   | 0                  | 0                   | 0                   | 0                    |
| <b>seq1685</b> | Firmicutes    | Clostridia   | 0                  | 0                   | 0                   | 0                    |
| <b>seq1745</b> | Firmicutes    | Clostridia   | 0                  | 0                   | 0                   | 0                    |
| <b>seq1762</b> | Firmicutes    | Clostridia   | 0                  | 0                   | 0                   | 0                    |
| <b>seq1765</b> | Firmicutes    | Clostridia   | 0                  | 0                   | 0                   | 0                    |
| <b>seq1778</b> | Firmicutes    | Clostridia   | 0                  | 0                   | 0                   | 0                    |
| <b>seq1793</b> | Firmicutes    | Clostridia   | 0                  | 0                   | 0                   | 0                    |
| <b>seq1813</b> | Firmicutes    | Clostridia   | 0                  | 0                   | 0                   | 0                    |
| <b>seq1814</b> | Firmicutes    | Clostridia   | 0                  | 0                   | 0                   | 0                    |
| <b>seq1857</b> | Firmicutes    | Clostridia   | 0                  | 0                   | 0                   | 0                    |
| <b>seq1859</b> | Firmicutes    | Clostridia   | 0                  | 0                   | 0                   | 0                    |
| <b>seq1339</b> | Firmicutes    | Clostridia   | 0                  | 0                   | 0                   | 0                    |
| <b>seq1504</b> | Firmicutes    | Clostridia   | 0                  | 0                   | 0                   | 0                    |
| <b>seq1512</b> | Firmicutes    | Clostridia   | 0                  | 0                   | 0                   | 0                    |
| <b>seq64</b>   | Firmicutes    | Clostridia   | 110                | 702                 | 528                 | 253                  |
| <b>seq200</b>  | Firmicutes    | Clostridia   | 55                 | 56                  | 0                   | 0                    |
| <b>seq619</b>  | Firmicutes    | Clostridia   | 0                  | 0                   | 0                   | 0                    |
| <b>seq753</b>  | Firmicutes    | Clostridia   | 0                  | 0                   | 0                   | 0                    |
| <b>seq849</b>  | Firmicutes    | Clostridia   | 0                  | 0                   | 0                   | 0                    |
| <b>seq948</b>  | Firmicutes    | Clostridia   | 0                  | 0                   | 0                   | 0                    |
| <b>seq1061</b> | Firmicutes    | Clostridia   | 0                  | 0                   | 0                   | 0                    |
| <b>seq1092</b> | Firmicutes    | Clostridia   | 0                  | 0                   | 0                   | 0                    |
| <b>seq1213</b> | Firmicutes    | Clostridia   | 0                  | 0                   | 0                   | 0                    |
| <b>seq1375</b> | Firmicutes    | Clostridia   | 0                  | 0                   | 0                   | 0                    |
| <b>seq1400</b> | Firmicutes    | Clostridia   | 0                  | 0                   | 0                   | 0                    |
| <b>seq1429</b> | Firmicutes    | Clostridia   | 0                  | 0                   | 0                   | 0                    |
| <b>seq1474</b> | Firmicutes    | Clostridia   | 0                  | 0                   | 0                   | 0                    |
| <b>seq1545</b> | Firmicutes    | Clostridia   | 0                  | 0                   | 0                   | 0                    |

Sequence Count Table

|                | <b>Phylum</b> | <b>Class</b> | <b>Subject8WK0</b> | <b>Subject8WK12</b> | <b>Subject9WK0</b> | <b>Subject9WK12</b> |
|----------------|---------------|--------------|--------------------|---------------------|--------------------|---------------------|
| <b>seq1432</b> | Firmicutes    | Clostridia   | 0                  | 0                   | 0                  | 0                   |
| <b>seq1475</b> | Firmicutes    | Clostridia   | 0                  | 0                   | 0                  | 0                   |
| <b>seq1507</b> | Firmicutes    | Clostridia   | 0                  | 0                   | 0                  | 0                   |
| <b>seq1554</b> | Firmicutes    | Clostridia   | 0                  | 0                   | 0                  | 0                   |
| <b>seq1561</b> | Firmicutes    | Clostridia   | 0                  | 0                   | 0                  | 0                   |
| <b>seq1685</b> | Firmicutes    | Clostridia   | 0                  | 0                   | 0                  | 0                   |
| <b>seq1745</b> | Firmicutes    | Clostridia   | 0                  | 0                   | 0                  | 0                   |
| <b>seq1762</b> | Firmicutes    | Clostridia   | 0                  | 0                   | 0                  | 0                   |
| <b>seq1765</b> | Firmicutes    | Clostridia   | 0                  | 0                   | 0                  | 0                   |
| <b>seq1778</b> | Firmicutes    | Clostridia   | 0                  | 0                   | 0                  | 0                   |
| <b>seq1793</b> | Firmicutes    | Clostridia   | 0                  | 0                   | 0                  | 0                   |
| <b>seq1813</b> | Firmicutes    | Clostridia   | 0                  | 0                   | 0                  | 0                   |
| <b>seq1814</b> | Firmicutes    | Clostridia   | 0                  | 0                   | 0                  | 0                   |
| <b>seq1857</b> | Firmicutes    | Clostridia   | 0                  | 0                   | 0                  | 0                   |
| <b>seq1859</b> | Firmicutes    | Clostridia   | 0                  | 0                   | 0                  | 0                   |
| <b>seq1339</b> | Firmicutes    | Clostridia   | 0                  | 0                   | 0                  | 0                   |
| <b>seq1504</b> | Firmicutes    | Clostridia   | 0                  | 0                   | 0                  | 0                   |
| <b>seq1512</b> | Firmicutes    | Clostridia   | 0                  | 0                   | 0                  | 0                   |
| <b>seq64</b>   | Firmicutes    | Clostridia   | 1519               | 567                 | 102                | 42                  |
| <b>seq200</b>  | Firmicutes    | Clostridia   | 714                | 158                 | 153                | 0                   |
| <b>seq619</b>  | Firmicutes    | Clostridia   | 0                  | 0                   | 0                  | 0                   |
| <b>seq753</b>  | Firmicutes    | Clostridia   | 0                  | 0                   | 0                  | 0                   |
| <b>seq849</b>  | Firmicutes    | Clostridia   | 0                  | 0                   | 0                  | 0                   |
| <b>seq948</b>  | Firmicutes    | Clostridia   | 0                  | 0                   | 0                  | 0                   |
| <b>seq1061</b> | Firmicutes    | Clostridia   | 0                  | 0                   | 0                  | 0                   |
| <b>seq1092</b> | Firmicutes    | Clostridia   | 0                  | 0                   | 0                  | 0                   |
| <b>seq1213</b> | Firmicutes    | Clostridia   | 0                  | 0                   | 0                  | 0                   |
| <b>seq1375</b> | Firmicutes    | Clostridia   | 0                  | 0                   | 0                  | 0                   |
| <b>seq1400</b> | Firmicutes    | Clostridia   | 0                  | 0                   | 0                  | 0                   |
| <b>seq1429</b> | Firmicutes    | Clostridia   | 0                  | 0                   | 0                  | 0                   |
| <b>seq1474</b> | Firmicutes    | Clostridia   | 0                  | 0                   | 0                  | 0                   |
| <b>seq1545</b> | Firmicutes    | Clostridia   | 0                  | 0                   | 0                  | 0                   |

Sequence Count Table

|                | <b>Phylum</b> | <b>Class</b> | <b>Subject10WK0</b> | <b>Subject10WK12</b> | <b>Subject22WK0</b> | <b>Subject22WK12</b> |
|----------------|---------------|--------------|---------------------|----------------------|---------------------|----------------------|
| <b>seq1432</b> | Firmicutes    | Clostridia   | 0                   | 0                    | 0                   | 0                    |
| <b>seq1475</b> | Firmicutes    | Clostridia   | 0                   | 0                    | 0                   | 0                    |
| <b>seq1507</b> | Firmicutes    | Clostridia   | 0                   | 0                    | 0                   | 0                    |
| <b>seq1554</b> | Firmicutes    | Clostridia   | 0                   | 0                    | 0                   | 0                    |
| <b>seq1561</b> | Firmicutes    | Clostridia   | 0                   | 0                    | 0                   | 0                    |
| <b>seq1685</b> | Firmicutes    | Clostridia   | 0                   | 0                    | 0                   | 0                    |
| <b>seq1745</b> | Firmicutes    | Clostridia   | 0                   | 0                    | 0                   | 0                    |
| <b>seq1762</b> | Firmicutes    | Clostridia   | 0                   | 0                    | 0                   | 0                    |
| <b>seq1765</b> | Firmicutes    | Clostridia   | 0                   | 0                    | 0                   | 0                    |
| <b>seq1778</b> | Firmicutes    | Clostridia   | 0                   | 0                    | 0                   | 0                    |
| <b>seq1793</b> | Firmicutes    | Clostridia   | 0                   | 0                    | 0                   | 0                    |
| <b>seq1813</b> | Firmicutes    | Clostridia   | 0                   | 0                    | 0                   | 0                    |
| <b>seq1814</b> | Firmicutes    | Clostridia   | 0                   | 0                    | 7                   | 0                    |
| <b>seq1857</b> | Firmicutes    | Clostridia   | 0                   | 0                    | 5                   | 0                    |
| <b>seq1859</b> | Firmicutes    | Clostridia   | 0                   | 0                    | 0                   | 0                    |
| <b>seq1339</b> | Firmicutes    | Clostridia   | 0                   | 0                    | 0                   | 0                    |
| <b>seq1504</b> | Firmicutes    | Clostridia   | 0                   | 0                    | 17                  | 11                   |
| <b>seq1512</b> | Firmicutes    | Clostridia   | 0                   | 0                    | 0                   | 0                    |
| <b>seq64</b>   | Firmicutes    | Clostridia   | 1124                | 760                  | 355                 | 446                  |
| <b>seq200</b>  | Firmicutes    | Clostridia   | 327                 | 253                  | 0                   | 0                    |
| <b>seq619</b>  | Firmicutes    | Clostridia   | 0                   | 0                    | 0                   | 0                    |
| <b>seq753</b>  | Firmicutes    | Clostridia   | 0                   | 0                    | 0                   | 0                    |
| <b>seq849</b>  | Firmicutes    | Clostridia   | 0                   | 0                    | 0                   | 10                   |
| <b>seq948</b>  | Firmicutes    | Clostridia   | 0                   | 0                    | 0                   | 0                    |
| <b>seq1061</b> | Firmicutes    | Clostridia   | 0                   | 0                    | 0                   | 0                    |
| <b>seq1092</b> | Firmicutes    | Clostridia   | 0                   | 0                    | 0                   | 0                    |
| <b>seq1213</b> | Firmicutes    | Clostridia   | 0                   | 0                    | 0                   | 0                    |
| <b>seq1375</b> | Firmicutes    | Clostridia   | 0                   | 0                    | 0                   | 0                    |
| <b>seq1400</b> | Firmicutes    | Clostridia   | 0                   | 0                    | 5                   | 0                    |
| <b>seq1429</b> | Firmicutes    | Clostridia   | 0                   | 0                    | 0                   | 0                    |
| <b>seq1474</b> | Firmicutes    | Clostridia   | 0                   | 0                    | 0                   | 0                    |
| <b>seq1545</b> | Firmicutes    | Clostridia   | 0                   | 0                    | 0                   | 0                    |

Sequence Count Table

|                | <b>Phylum</b> | <b>Class</b> | <b>Subject23WK0</b> | <b>Subject23WK12</b> | <b>Subject24WK0</b> | <b>Subject24WK12</b> |
|----------------|---------------|--------------|---------------------|----------------------|---------------------|----------------------|
| <b>seq1432</b> | Firmicutes    | Clostridia   | 0                   | 0                    | 0                   | 0                    |
| <b>seq1475</b> | Firmicutes    | Clostridia   | 0                   | 0                    | 0                   | 0                    |
| <b>seq1507</b> | Firmicutes    | Clostridia   | 0                   | 0                    | 0                   | 0                    |
| <b>seq1554</b> | Firmicutes    | Clostridia   | 0                   | 0                    | 0                   | 0                    |
| <b>seq1561</b> | Firmicutes    | Clostridia   | 0                   | 0                    | 0                   | 0                    |
| <b>seq1685</b> | Firmicutes    | Clostridia   | 0                   | 0                    | 0                   | 0                    |
| <b>seq1745</b> | Firmicutes    | Clostridia   | 0                   | 0                    | 0                   | 0                    |
| <b>seq1762</b> | Firmicutes    | Clostridia   | 0                   | 0                    | 0                   | 0                    |
| <b>seq1765</b> | Firmicutes    | Clostridia   | 0                   | 0                    | 0                   | 0                    |
| <b>seq1778</b> | Firmicutes    | Clostridia   | 0                   | 0                    | 0                   | 0                    |
| <b>seq1793</b> | Firmicutes    | Clostridia   | 0                   | 0                    | 0                   | 0                    |
| <b>seq1813</b> | Firmicutes    | Clostridia   | 0                   | 0                    | 0                   | 0                    |
| <b>seq1814</b> | Firmicutes    | Clostridia   | 0                   | 0                    | 0                   | 0                    |
| <b>seq1857</b> | Firmicutes    | Clostridia   | 0                   | 0                    | 0                   | 0                    |
| <b>seq1859</b> | Firmicutes    | Clostridia   | 0                   | 5                    | 0                   | 0                    |
| <b>seq1339</b> | Firmicutes    | Clostridia   | 0                   | 7                    | 0                   | 0                    |
| <b>seq1504</b> | Firmicutes    | Clostridia   | 0                   | 0                    | 0                   | 0                    |
| <b>seq1512</b> | Firmicutes    | Clostridia   | 0                   | 0                    | 0                   | 0                    |
| <b>seq64</b>   | Firmicutes    | Clostridia   | 152                 | 590                  | 773                 | 174                  |
| <b>seq200</b>  | Firmicutes    | Clostridia   | 18                  | 0                    | 17                  | 0                    |
| <b>seq619</b>  | Firmicutes    | Clostridia   | 0                   | 0                    | 0                   | 0                    |
| <b>seq753</b>  | Firmicutes    | Clostridia   | 0                   | 0                    | 0                   | 0                    |
| <b>seq849</b>  | Firmicutes    | Clostridia   | 0                   | 0                    | 0                   | 0                    |
| <b>seq948</b>  | Firmicutes    | Clostridia   | 0                   | 0                    | 0                   | 86                   |
| <b>seq1061</b> | Firmicutes    | Clostridia   | 0                   | 0                    | 0                   | 0                    |
| <b>seq1092</b> | Firmicutes    | Clostridia   | 0                   | 0                    | 0                   | 0                    |
| <b>seq1213</b> | Firmicutes    | Clostridia   | 0                   | 5                    | 0                   | 0                    |
| <b>seq1375</b> | Firmicutes    | Clostridia   | 0                   | 0                    | 0                   | 0                    |
| <b>seq1400</b> | Firmicutes    | Clostridia   | 0                   | 0                    | 0                   | 0                    |
| <b>seq1429</b> | Firmicutes    | Clostridia   | 0                   | 0                    | 0                   | 0                    |
| <b>seq1474</b> | Firmicutes    | Clostridia   | 0                   | 0                    | 0                   | 0                    |
| <b>seq1545</b> | Firmicutes    | Clostridia   | 0                   | 0                    | 0                   | 0                    |

Sequence Count Table

|                | <b>Phylum</b> | <b>Class</b> | <b>Subject11WK0</b> | <b>Subject11WK12</b> | <b>Subject12WK0</b> | <b>Subject12WK12</b> |
|----------------|---------------|--------------|---------------------|----------------------|---------------------|----------------------|
| <b>seq1432</b> | Firmicutes    | Clostridia   | 0                   | 0                    | 0                   | 0                    |
| <b>seq1475</b> | Firmicutes    | Clostridia   | 0                   | 0                    | 0                   | 0                    |
| <b>seq1507</b> | Firmicutes    | Clostridia   | 0                   | 0                    | 0                   | 0                    |
| <b>seq1554</b> | Firmicutes    | Clostridia   | 0                   | 0                    | 0                   | 0                    |
| <b>seq1561</b> | Firmicutes    | Clostridia   | 0                   | 0                    | 0                   | 0                    |
| <b>seq1685</b> | Firmicutes    | Clostridia   | 0                   | 0                    | 0                   | 0                    |
| <b>seq1745</b> | Firmicutes    | Clostridia   | 0                   | 0                    | 0                   | 0                    |
| <b>seq1762</b> | Firmicutes    | Clostridia   | 0                   | 0                    | 0                   | 0                    |
| <b>seq1765</b> | Firmicutes    | Clostridia   | 0                   | 0                    | 0                   | 0                    |
| <b>seq1778</b> | Firmicutes    | Clostridia   | 0                   | 0                    | 0                   | 0                    |
| <b>seq1793</b> | Firmicutes    | Clostridia   | 0                   | 0                    | 0                   | 0                    |
| <b>seq1813</b> | Firmicutes    | Clostridia   | 0                   | 0                    | 0                   | 0                    |
| <b>seq1814</b> | Firmicutes    | Clostridia   | 0                   | 0                    | 0                   | 0                    |
| <b>seq1857</b> | Firmicutes    | Clostridia   | 0                   | 0                    | 0                   | 0                    |
| <b>seq1859</b> | Firmicutes    | Clostridia   | 0                   | 0                    | 0                   | 0                    |
| <b>seq1339</b> | Firmicutes    | Clostridia   | 0                   | 0                    | 0                   | 0                    |
| <b>seq1504</b> | Firmicutes    | Clostridia   | 0                   | 0                    | 0                   | 0                    |
| <b>seq1512</b> | Firmicutes    | Clostridia   | 0                   | 0                    | 0                   | 0                    |
| <b>seq64</b>   | Firmicutes    | Clostridia   | 253                 | 496                  | 816                 | 824                  |
| <b>seq200</b>  | Firmicutes    | Clostridia   | 282                 | 25                   | 0                   | 0                    |
| <b>seq619</b>  | Firmicutes    | Clostridia   | 84                  | 166                  | 0                   | 0                    |
| <b>seq753</b>  | Firmicutes    | Clostridia   | 0                   | 0                    | 0                   | 0                    |
| <b>seq849</b>  | Firmicutes    | Clostridia   | 0                   | 0                    | 0                   | 0                    |
| <b>seq948</b>  | Firmicutes    | Clostridia   | 0                   | 0                    | 0                   | 0                    |
| <b>seq1061</b> | Firmicutes    | Clostridia   | 0                   | 0                    | 0                   | 0                    |
| <b>seq1092</b> | Firmicutes    | Clostridia   | 0                   | 0                    | 0                   | 0                    |
| <b>seq1213</b> | Firmicutes    | Clostridia   | 0                   | 0                    | 0                   | 0                    |
| <b>seq1375</b> | Firmicutes    | Clostridia   | 0                   | 0                    | 0                   | 0                    |
| <b>seq1400</b> | Firmicutes    | Clostridia   | 0                   | 0                    | 0                   | 0                    |
| <b>seq1429</b> | Firmicutes    | Clostridia   | 0                   | 0                    | 0                   | 0                    |
| <b>seq1474</b> | Firmicutes    | Clostridia   | 0                   | 0                    | 0                   | 0                    |
| <b>seq1545</b> | Firmicutes    | Clostridia   | 0                   | 0                    | 0                   | 0                    |

Sequence Count Table

|                | <b>Phylum</b> | <b>Class</b> | <b>Subject25WK0</b> | <b>Subject25WK12</b> | <b>Subject38WK0</b> | <b>Subject38WK12</b> |
|----------------|---------------|--------------|---------------------|----------------------|---------------------|----------------------|
| <b>seq1432</b> | Firmicutes    | Clostridia   | 0                   | 0                    | 0                   | 0                    |
| <b>seq1475</b> | Firmicutes    | Clostridia   | 0                   | 0                    | 0                   | 0                    |
| <b>seq1507</b> | Firmicutes    | Clostridia   | 0                   | 0                    | 0                   | 0                    |
| <b>seq1554</b> | Firmicutes    | Clostridia   | 0                   | 0                    | 0                   | 0                    |
| <b>seq1561</b> | Firmicutes    | Clostridia   | 0                   | 0                    | 0                   | 0                    |
| <b>seq1685</b> | Firmicutes    | Clostridia   | 0                   | 0                    | 0                   | 0                    |
| <b>seq1745</b> | Firmicutes    | Clostridia   | 0                   | 0                    | 0                   | 0                    |
| <b>seq1762</b> | Firmicutes    | Clostridia   | 0                   | 0                    | 0                   | 0                    |
| <b>seq1765</b> | Firmicutes    | Clostridia   | 0                   | 0                    | 0                   | 0                    |
| <b>seq1778</b> | Firmicutes    | Clostridia   | 0                   | 9                    | 0                   | 0                    |
| <b>seq1793</b> | Firmicutes    | Clostridia   | 0                   | 0                    | 0                   | 0                    |
| <b>seq1813</b> | Firmicutes    | Clostridia   | 0                   | 0                    | 0                   | 0                    |
| <b>seq1814</b> | Firmicutes    | Clostridia   | 0                   | 0                    | 0                   | 0                    |
| <b>seq1857</b> | Firmicutes    | Clostridia   | 0                   | 0                    | 0                   | 0                    |
| <b>seq1859</b> | Firmicutes    | Clostridia   | 0                   | 0                    | 0                   | 0                    |
| <b>seq1339</b> | Firmicutes    | Clostridia   | 20                  | 0                    | 0                   | 0                    |
| <b>seq1504</b> | Firmicutes    | Clostridia   | 0                   | 0                    | 0                   | 0                    |
| <b>seq1512</b> | Firmicutes    | Clostridia   | 0                   | 0                    | 0                   | 0                    |
| <b>seq64</b>   | Firmicutes    | Clostridia   | 360                 | 291                  | 0                   | 0                    |
| <b>seq200</b>  | Firmicutes    | Clostridia   | 95                  | 243                  | 0                   | 0                    |
| <b>seq619</b>  | Firmicutes    | Clostridia   | 0                   | 0                    | 0                   | 0                    |
| <b>seq753</b>  | Firmicutes    | Clostridia   | 0                   | 0                    | 0                   | 0                    |
| <b>seq849</b>  | Firmicutes    | Clostridia   | 0                   | 0                    | 0                   | 0                    |
| <b>seq948</b>  | Firmicutes    | Clostridia   | 0                   | 0                    | 0                   | 0                    |
| <b>seq1061</b> | Firmicutes    | Clostridia   | 0                   | 0                    | 0                   | 0                    |
| <b>seq1092</b> | Firmicutes    | Clostridia   | 0                   | 0                    | 0                   | 0                    |
| <b>seq1213</b> | Firmicutes    | Clostridia   | 0                   | 0                    | 0                   | 0                    |
| <b>seq1375</b> | Firmicutes    | Clostridia   | 0                   | 0                    | 0                   | 0                    |
| <b>seq1400</b> | Firmicutes    | Clostridia   | 3                   | 14                   | 0                   | 0                    |
| <b>seq1429</b> | Firmicutes    | Clostridia   | 0                   | 0                    | 0                   | 0                    |
| <b>seq1474</b> | Firmicutes    | Clostridia   | 0                   | 0                    | 0                   | 0                    |
| <b>seq1545</b> | Firmicutes    | Clostridia   | 0                   | 0                    | 0                   | 0                    |



Sequence Count Table

|                | <b>Phylum</b> | <b>Class</b> | <b>Subject31WK0</b> | <b>Subject31WK12</b> | <b>Subject32WK0</b> | <b>Subject32WK12</b> |
|----------------|---------------|--------------|---------------------|----------------------|---------------------|----------------------|
| <b>seq1432</b> | Firmicutes    | Clostridia   | 0                   | 0                    | 0                   | 0                    |
| <b>seq1475</b> | Firmicutes    | Clostridia   | 0                   | 0                    | 0                   | 0                    |
| <b>seq1507</b> | Firmicutes    | Clostridia   | 0                   | 0                    | 0                   | 0                    |
| <b>seq1554</b> | Firmicutes    | Clostridia   | 0                   | 0                    | 0                   | 0                    |
| <b>seq1561</b> | Firmicutes    | Clostridia   | 0                   | 0                    | 0                   | 0                    |
| <b>seq1685</b> | Firmicutes    | Clostridia   | 0                   | 0                    | 0                   | 0                    |
| <b>seq1745</b> | Firmicutes    | Clostridia   | 0                   | 0                    | 0                   | 0                    |
| <b>seq1762</b> | Firmicutes    | Clostridia   | 0                   | 0                    | 0                   | 0                    |
| <b>seq1765</b> | Firmicutes    | Clostridia   | 0                   | 0                    | 0                   | 0                    |
| <b>seq1778</b> | Firmicutes    | Clostridia   | 0                   | 0                    | 0                   | 0                    |
| <b>seq1793</b> | Firmicutes    | Clostridia   | 0                   | 0                    | 0                   | 0                    |
| <b>seq1813</b> | Firmicutes    | Clostridia   | 0                   | 0                    | 0                   | 0                    |
| <b>seq1814</b> | Firmicutes    | Clostridia   | 0                   | 0                    | 0                   | 0                    |
| <b>seq1857</b> | Firmicutes    | Clostridia   | 0                   | 0                    | 0                   | 0                    |
| <b>seq1859</b> | Firmicutes    | Clostridia   | 0                   | 0                    | 0                   | 0                    |
| <b>seq1339</b> | Firmicutes    | Clostridia   | 0                   | 0                    | 0                   | 0                    |
| <b>seq1504</b> | Firmicutes    | Clostridia   | 0                   | 0                    | 0                   | 0                    |
| <b>seq1512</b> | Firmicutes    | Clostridia   | 0                   | 0                    | 0                   | 0                    |
| <b>seq64</b>   | Firmicutes    | Clostridia   | 0                   | 0                    | 166                 | 0                    |
| <b>seq200</b>  | Firmicutes    | Clostridia   | 0                   | 0                    | 16                  | 0                    |
| <b>seq619</b>  | Firmicutes    | Clostridia   | 0                   | 0                    | 0                   | 0                    |
| <b>seq753</b>  | Firmicutes    | Clostridia   | 0                   | 0                    | 90                  | 0                    |
| <b>seq849</b>  | Firmicutes    | Clostridia   | 0                   | 0                    | 0                   | 0                    |
| <b>seq948</b>  | Firmicutes    | Clostridia   | 0                   | 0                    | 72                  | 9                    |
| <b>seq1061</b> | Firmicutes    | Clostridia   | 0                   | 0                    | 0                   | 0                    |
| <b>seq1092</b> | Firmicutes    | Clostridia   | 0                   | 0                    | 0                   | 0                    |
| <b>seq1213</b> | Firmicutes    | Clostridia   | 0                   | 0                    | 0                   | 0                    |
| <b>seq1375</b> | Firmicutes    | Clostridia   | 0                   | 0                    | 0                   | 0                    |
| <b>seq1400</b> | Firmicutes    | Clostridia   | 0                   | 0                    | 0                   | 0                    |
| <b>seq1429</b> | Firmicutes    | Clostridia   | 0                   | 0                    | 0                   | 0                    |
| <b>seq1474</b> | Firmicutes    | Clostridia   | 0                   | 0                    | 0                   | 0                    |
| <b>seq1545</b> | Firmicutes    | Clostridia   | 0                   | 0                    | 0                   | 0                    |

Sequence Count Table

|                | <b>Phylum</b> | <b>Class</b> | <b>Subject13WK0</b> | <b>Subject13WK12</b> | <b>Subject39WK0</b> | <b>Subject39WK12</b> |
|----------------|---------------|--------------|---------------------|----------------------|---------------------|----------------------|
| <b>seq1432</b> | Firmicutes    | Clostridia   | 0                   | 0                    | 0                   | 0                    |
| <b>seq1475</b> | Firmicutes    | Clostridia   | 0                   | 0                    | 0                   | 0                    |
| <b>seq1507</b> | Firmicutes    | Clostridia   | 28                  | 0                    | 0                   | 0                    |
| <b>seq1554</b> | Firmicutes    | Clostridia   | 0                   | 0                    | 0                   | 0                    |
| <b>seq1561</b> | Firmicutes    | Clostridia   | 0                   | 0                    | 0                   | 0                    |
| <b>seq1685</b> | Firmicutes    | Clostridia   | 14                  | 0                    | 0                   | 0                    |
| <b>seq1745</b> | Firmicutes    | Clostridia   | 0                   | 0                    | 0                   | 0                    |
| <b>seq1762</b> | Firmicutes    | Clostridia   | 0                   | 0                    | 0                   | 0                    |
| <b>seq1765</b> | Firmicutes    | Clostridia   | 0                   | 0                    | 0                   | 0                    |
| <b>seq1778</b> | Firmicutes    | Clostridia   | 0                   | 0                    | 0                   | 0                    |
| <b>seq1793</b> | Firmicutes    | Clostridia   | 0                   | 0                    | 0                   | 0                    |
| <b>seq1813</b> | Firmicutes    | Clostridia   | 0                   | 0                    | 0                   | 0                    |
| <b>seq1814</b> | Firmicutes    | Clostridia   | 0                   | 0                    | 0                   | 0                    |
| <b>seq1857</b> | Firmicutes    | Clostridia   | 0                   | 0                    | 0                   | 0                    |
| <b>seq1859</b> | Firmicutes    | Clostridia   | 0                   | 0                    | 0                   | 0                    |
| <b>seq1339</b> | Firmicutes    | Clostridia   | 0                   | 6                    | 0                   | 0                    |
| <b>seq1504</b> | Firmicutes    | Clostridia   | 0                   | 0                    | 0                   | 0                    |
| <b>seq1512</b> | Firmicutes    | Clostridia   | 0                   | 0                    | 0                   | 0                    |
| <b>seq64</b>   | Firmicutes    | Clostridia   | 335                 | 806                  | 0                   | 84                   |
| <b>seq200</b>  | Firmicutes    | Clostridia   | 0                   | 0                    | 0                   | 0                    |
| <b>seq619</b>  | Firmicutes    | Clostridia   | 0                   | 0                    | 0                   | 0                    |
| <b>seq753</b>  | Firmicutes    | Clostridia   | 0                   | 0                    | 0                   | 0                    |
| <b>seq849</b>  | Firmicutes    | Clostridia   | 0                   | 0                    | 0                   | 0                    |
| <b>seq948</b>  | Firmicutes    | Clostridia   | 0                   | 0                    | 0                   | 0                    |
| <b>seq1061</b> | Firmicutes    | Clostridia   | 0                   | 0                    | 0                   | 0                    |
| <b>seq1092</b> | Firmicutes    | Clostridia   | 0                   | 0                    | 0                   | 0                    |
| <b>seq1213</b> | Firmicutes    | Clostridia   | 0                   | 0                    | 0                   | 0                    |
| <b>seq1375</b> | Firmicutes    | Clostridia   | 37                  | 8                    | 0                   | 0                    |
| <b>seq1400</b> | Firmicutes    | Clostridia   | 0                   | 0                    | 0                   | 0                    |
| <b>seq1429</b> | Firmicutes    | Clostridia   | 38                  | 0                    | 0                   | 0                    |
| <b>seq1474</b> | Firmicutes    | Clostridia   | 0                   | 0                    | 0                   | 0                    |
| <b>seq1545</b> | Firmicutes    | Clostridia   | 0                   | 0                    | 0                   | 0                    |

Sequence Count Table

|                | <b>Phylum</b> | <b>Class</b> | <b>Subject26WK0</b> | <b>Subject26WK12</b> | <b>Subject14WK0</b> | <b>Subject14WK12</b> |
|----------------|---------------|--------------|---------------------|----------------------|---------------------|----------------------|
| <b>seq1432</b> | Firmicutes    | Clostridia   | 0                   | 0                    | 0                   | 0                    |
| <b>seq1475</b> | Firmicutes    | Clostridia   | 0                   | 0                    | 0                   | 0                    |
| <b>seq1507</b> | Firmicutes    | Clostridia   | 0                   | 0                    | 0                   | 0                    |
| <b>seq1554</b> | Firmicutes    | Clostridia   | 0                   | 0                    | 0                   | 0                    |
| <b>seq1561</b> | Firmicutes    | Clostridia   | 0                   | 0                    | 23                  | 0                    |
| <b>seq1685</b> | Firmicutes    | Clostridia   | 0                   | 0                    | 0                   | 0                    |
| <b>seq1745</b> | Firmicutes    | Clostridia   | 0                   | 0                    | 0                   | 0                    |
| <b>seq1762</b> | Firmicutes    | Clostridia   | 0                   | 0                    | 0                   | 0                    |
| <b>seq1765</b> | Firmicutes    | Clostridia   | 0                   | 0                    | 0                   | 0                    |
| <b>seq1778</b> | Firmicutes    | Clostridia   | 0                   | 0                    | 0                   | 0                    |
| <b>seq1793</b> | Firmicutes    | Clostridia   | 0                   | 0                    | 0                   | 0                    |
| <b>seq1813</b> | Firmicutes    | Clostridia   | 0                   | 0                    | 0                   | 0                    |
| <b>seq1814</b> | Firmicutes    | Clostridia   | 0                   | 0                    | 0                   | 0                    |
| <b>seq1857</b> | Firmicutes    | Clostridia   | 0                   | 0                    | 0                   | 0                    |
| <b>seq1859</b> | Firmicutes    | Clostridia   | 0                   | 0                    | 0                   | 0                    |
| <b>seq1339</b> | Firmicutes    | Clostridia   | 0                   | 0                    | 0                   | 0                    |
| <b>seq1504</b> | Firmicutes    | Clostridia   | 0                   | 0                    | 0                   | 0                    |
| <b>seq1512</b> | Firmicutes    | Clostridia   | 0                   | 0                    | 0                   | 0                    |
| <b>seq64</b>   | Firmicutes    | Clostridia   | 117                 | 80                   | 424                 | 350                  |
| <b>seq200</b>  | Firmicutes    | Clostridia   | 351                 | 165                  | 71                  | 228                  |
| <b>seq619</b>  | Firmicutes    | Clostridia   | 0                   | 0                    | 0                   | 0                    |
| <b>seq753</b>  | Firmicutes    | Clostridia   | 0                   | 0                    | 0                   | 0                    |
| <b>seq849</b>  | Firmicutes    | Clostridia   | 0                   | 0                    | 0                   | 0                    |
| <b>seq948</b>  | Firmicutes    | Clostridia   | 0                   | 0                    | 0                   | 0                    |
| <b>seq1061</b> | Firmicutes    | Clostridia   | 0                   | 0                    | 0                   | 0                    |
| <b>seq1092</b> | Firmicutes    | Clostridia   | 0                   | 0                    | 0                   | 0                    |
| <b>seq1213</b> | Firmicutes    | Clostridia   | 0                   | 0                    | 0                   | 0                    |
| <b>seq1375</b> | Firmicutes    | Clostridia   | 0                   | 0                    | 0                   | 0                    |
| <b>seq1400</b> | Firmicutes    | Clostridia   | 0                   | 0                    | 0                   | 0                    |
| <b>seq1429</b> | Firmicutes    | Clostridia   | 0                   | 0                    | 0                   | 0                    |
| <b>seq1474</b> | Firmicutes    | Clostridia   | 0                   | 0                    | 0                   | 0                    |
| <b>seq1545</b> | Firmicutes    | Clostridia   | 0                   | 0                    | 0                   | 0                    |

Sequence Count Table

|                | <b>Phylum</b> | <b>Class</b> | <b>Subject27WK0</b> | <b>Subject27WK12</b> | <b>Subject15WK0</b> | <b>Subject15WK12</b> |
|----------------|---------------|--------------|---------------------|----------------------|---------------------|----------------------|
| <b>seq1432</b> | Firmicutes    | Clostridia   | 0                   | 0                    | 0                   | 0                    |
| <b>seq1475</b> | Firmicutes    | Clostridia   | 0                   | 0                    | 0                   | 0                    |
| <b>seq1507</b> | Firmicutes    | Clostridia   | 0                   | 0                    | 0                   | 0                    |
| <b>seq1554</b> | Firmicutes    | Clostridia   | 0                   | 0                    | 0                   | 0                    |
| <b>seq1561</b> | Firmicutes    | Clostridia   | 0                   | 0                    | 0                   | 0                    |
| <b>seq1685</b> | Firmicutes    | Clostridia   | 0                   | 0                    | 0                   | 0                    |
| <b>seq1745</b> | Firmicutes    | Clostridia   | 0                   | 0                    | 0                   | 0                    |
| <b>seq1762</b> | Firmicutes    | Clostridia   | 0                   | 0                    | 0                   | 0                    |
| <b>seq1765</b> | Firmicutes    | Clostridia   | 0                   | 0                    | 0                   | 0                    |
| <b>seq1778</b> | Firmicutes    | Clostridia   | 0                   | 0                    | 0                   | 0                    |
| <b>seq1793</b> | Firmicutes    | Clostridia   | 0                   | 0                    | 0                   | 0                    |
| <b>seq1813</b> | Firmicutes    | Clostridia   | 0                   | 0                    | 0                   | 0                    |
| <b>seq1814</b> | Firmicutes    | Clostridia   | 0                   | 0                    | 0                   | 0                    |
| <b>seq1857</b> | Firmicutes    | Clostridia   | 0                   | 0                    | 0                   | 0                    |
| <b>seq1859</b> | Firmicutes    | Clostridia   | 0                   | 0                    | 0                   | 0                    |
| <b>seq1339</b> | Firmicutes    | Clostridia   | 0                   | 0                    | 0                   | 0                    |
| <b>seq1504</b> | Firmicutes    | Clostridia   | 0                   | 0                    | 0                   | 0                    |
| <b>seq1512</b> | Firmicutes    | Clostridia   | 0                   | 0                    | 0                   | 0                    |
| <b>seq64</b>   | Firmicutes    | Clostridia   | 242                 | 158                  | 189                 | 242                  |
| <b>seq200</b>  | Firmicutes    | Clostridia   | 0                   | 44                   | 0                   | 0                    |
| <b>seq619</b>  | Firmicutes    | Clostridia   | 0                   | 0                    | 0                   | 0                    |
| <b>seq753</b>  | Firmicutes    | Clostridia   | 0                   | 0                    | 0                   | 0                    |
| <b>seq849</b>  | Firmicutes    | Clostridia   | 0                   | 0                    | 0                   | 0                    |
| <b>seq948</b>  | Firmicutes    | Clostridia   | 0                   | 0                    | 0                   | 0                    |
| <b>seq1061</b> | Firmicutes    | Clostridia   | 0                   | 0                    | 0                   | 0                    |
| <b>seq1092</b> | Firmicutes    | Clostridia   | 0                   | 0                    | 0                   | 0                    |
| <b>seq1213</b> | Firmicutes    | Clostridia   | 0                   | 0                    | 0                   | 0                    |
| <b>seq1375</b> | Firmicutes    | Clostridia   | 0                   | 0                    | 0                   | 0                    |
| <b>seq1400</b> | Firmicutes    | Clostridia   | 0                   | 0                    | 0                   | 0                    |
| <b>seq1429</b> | Firmicutes    | Clostridia   | 0                   | 0                    | 0                   | 0                    |
| <b>seq1474</b> | Firmicutes    | Clostridia   | 0                   | 0                    | 0                   | 0                    |
| <b>seq1545</b> | Firmicutes    | Clostridia   | 0                   | 0                    | 0                   | 0                    |

Sequence Count Table

|                | <b>Phylum</b> | <b>Class</b> | <b>Δ</b> |  |  |  |
|----------------|---------------|--------------|----------|--|--|--|
| <b>seq1432</b> | Firmicutes    | Clostridia   |          |  |  |  |
| <b>seq1475</b> | Firmicutes    | Clostridia   |          |  |  |  |
| <b>seq1507</b> | Firmicutes    | Clostridia   |          |  |  |  |
| <b>seq1554</b> | Firmicutes    | Clostridia   |          |  |  |  |
| <b>seq1561</b> | Firmicutes    | Clostridia   |          |  |  |  |
| <b>seq1685</b> | Firmicutes    | Clostridia   |          |  |  |  |
| <b>seq1745</b> | Firmicutes    | Clostridia   |          |  |  |  |
| <b>seq1762</b> | Firmicutes    | Clostridia   |          |  |  |  |
| <b>seq1765</b> | Firmicutes    | Clostridia   |          |  |  |  |
| <b>seq1778</b> | Firmicutes    | Clostridia   |          |  |  |  |
| <b>seq1793</b> | Firmicutes    | Clostridia   |          |  |  |  |
| <b>seq1813</b> | Firmicutes    | Clostridia   |          |  |  |  |
| <b>seq1814</b> | Firmicutes    | Clostridia   |          |  |  |  |
| <b>seq1857</b> | Firmicutes    | Clostridia   |          |  |  |  |
| <b>seq1859</b> | Firmicutes    | Clostridia   |          |  |  |  |
| <b>seq1339</b> | Firmicutes    | Clostridia   |          |  |  |  |
| <b>seq1504</b> | Firmicutes    | Clostridia   |          |  |  |  |
| <b>seq1512</b> | Firmicutes    | Clostridia   |          |  |  |  |
| <b>seq64</b>   | Firmicutes    | Clostridia   |          |  |  |  |
| <b>seq200</b>  | Firmicutes    | Clostridia   |          |  |  |  |
| <b>seq619</b>  | Firmicutes    | Clostridia   |          |  |  |  |
| <b>seq753</b>  | Firmicutes    | Clostridia   |          |  |  |  |
| <b>seq849</b>  | Firmicutes    | Clostridia   |          |  |  |  |
| <b>seq948</b>  | Firmicutes    | Clostridia   |          |  |  |  |
| <b>seq1061</b> | Firmicutes    | Clostridia   |          |  |  |  |
| <b>seq1092</b> | Firmicutes    | Clostridia   |          |  |  |  |
| <b>seq1213</b> | Firmicutes    | Clostridia   |          |  |  |  |
| <b>seq1375</b> | Firmicutes    | Clostridia   |          |  |  |  |
| <b>seq1400</b> | Firmicutes    | Clostridia   |          |  |  |  |
| <b>seq1429</b> | Firmicutes    | Clostridia   |          |  |  |  |
| <b>seq1474</b> | Firmicutes    | Clostridia   |          |  |  |  |
| <b>seq1545</b> | Firmicutes    | Clostridia   |          |  |  |  |

Sequence Count Table

|                | <b>Phylum</b> | <b>Class</b> | <b>Order</b>  | <b>Family</b>   |
|----------------|---------------|--------------|---------------|-----------------|
| <b>seq1726</b> | Firmicutes    | Clostridia   | Clostridiales | Ruminococcaceae |
| <b>seq1754</b> | Firmicutes    | Clostridia   | Clostridiales | Ruminococcaceae |
| <b>seq1804</b> | Firmicutes    | Clostridia   | Clostridiales | Ruminococcaceae |
| <b>seq189</b>  | Firmicutes    | Clostridia   | Clostridiales | Ruminococcaceae |
| <b>seq294</b>  | Firmicutes    | Clostridia   | Clostridiales | Ruminococcaceae |
| <b>seq307</b>  | Firmicutes    | Clostridia   | Clostridiales | Ruminococcaceae |
| <b>seq324</b>  | Firmicutes    | Clostridia   | Clostridiales | Ruminococcaceae |
| <b>seq331</b>  | Firmicutes    | Clostridia   | Clostridiales | Ruminococcaceae |
| <b>seq346</b>  | Firmicutes    | Clostridia   | Clostridiales | Ruminococcaceae |
| <b>seq376</b>  | Firmicutes    | Clostridia   | Clostridiales | Ruminococcaceae |
| <b>seq450</b>  | Firmicutes    | Clostridia   | Clostridiales | Ruminococcaceae |
| <b>seq466</b>  | Firmicutes    | Clostridia   | Clostridiales | Ruminococcaceae |
| <b>seq597</b>  | Firmicutes    | Clostridia   | Clostridiales | Ruminococcaceae |
| <b>seq612</b>  | Firmicutes    | Clostridia   | Clostridiales | Ruminococcaceae |
| <b>seq618</b>  | Firmicutes    | Clostridia   | Clostridiales | Ruminococcaceae |
| <b>seq628</b>  | Firmicutes    | Clostridia   | Clostridiales | Ruminococcaceae |
| <b>seq636</b>  | Firmicutes    | Clostridia   | Clostridiales | Ruminococcaceae |
| <b>seq730</b>  | Firmicutes    | Clostridia   | Clostridiales | Ruminococcaceae |
| <b>seq769</b>  | Firmicutes    | Clostridia   | Clostridiales | Ruminococcaceae |
| <b>seq871</b>  | Firmicutes    | Clostridia   | Clostridiales | Ruminococcaceae |
| <b>seq1019</b> | Firmicutes    | Clostridia   | Clostridiales | Ruminococcaceae |
| <b>seq1146</b> | Firmicutes    | Clostridia   | Clostridiales | Ruminococcaceae |
| <b>seq1182</b> | Firmicutes    | Clostridia   | Clostridiales | Ruminococcaceae |
| <b>seq1192</b> | Firmicutes    | Clostridia   | Clostridiales | Ruminococcaceae |
| <b>seq1281</b> | Firmicutes    | Clostridia   | Clostridiales | Ruminococcaceae |
| <b>seq1390</b> | Firmicutes    | Clostridia   | Clostridiales | Ruminococcaceae |
| <b>seq1428</b> | Firmicutes    | Clostridia   | Clostridiales | Ruminococcaceae |
| <b>seq1450</b> | Firmicutes    | Clostridia   | Clostridiales | Ruminococcaceae |
| <b>seq1471</b> | Firmicutes    | Clostridia   | Clostridiales | Ruminococcaceae |
| <b>seq1488</b> | Firmicutes    | Clostridia   | Clostridiales | Ruminococcaceae |
| <b>seq1511</b> | Firmicutes    | Clostridia   | Clostridiales | Ruminococcaceae |
| <b>seq1518</b> | Firmicutes    | Clostridia   | Clostridiales | Ruminococcaceae |

Sequence Count Table

|                | <b>Phylum</b> | <b>Class</b> | <b>Genus</b>            | <b>Species</b> |
|----------------|---------------|--------------|-------------------------|----------------|
| <b>seq1726</b> | Firmicutes    | Clostridia   | Ruminococcaceae_UCG-013 |                |
| <b>seq1754</b> | Firmicutes    | Clostridia   | Ruminococcaceae_UCG-013 |                |
| <b>seq1804</b> | Firmicutes    | Clostridia   | Ruminococcaceae_UCG-013 |                |
| <b>seq189</b>  | Firmicutes    | Clostridia   | Ruminococcaceae_UCG-014 |                |
| <b>seq294</b>  | Firmicutes    | Clostridia   | Ruminococcaceae_UCG-014 |                |
| <b>seq307</b>  | Firmicutes    | Clostridia   | Ruminococcaceae_UCG-014 |                |
| <b>seq324</b>  | Firmicutes    | Clostridia   | Ruminococcaceae_UCG-014 |                |
| <b>seq331</b>  | Firmicutes    | Clostridia   | Ruminococcaceae_UCG-014 |                |
| <b>seq346</b>  | Firmicutes    | Clostridia   | Ruminococcaceae_UCG-014 |                |
| <b>seq376</b>  | Firmicutes    | Clostridia   | Ruminococcaceae_UCG-014 |                |
| <b>seq450</b>  | Firmicutes    | Clostridia   | Ruminococcaceae_UCG-014 |                |
| <b>seq466</b>  | Firmicutes    | Clostridia   | Ruminococcaceae_UCG-014 |                |
| <b>seq597</b>  | Firmicutes    | Clostridia   | Ruminococcaceae_UCG-014 |                |
| <b>seq612</b>  | Firmicutes    | Clostridia   | Ruminococcaceae_UCG-014 |                |
| <b>seq618</b>  | Firmicutes    | Clostridia   | Ruminococcaceae_UCG-014 |                |
| <b>seq628</b>  | Firmicutes    | Clostridia   | Ruminococcaceae_UCG-014 |                |
| <b>seq636</b>  | Firmicutes    | Clostridia   | Ruminococcaceae_UCG-014 |                |
| <b>seq730</b>  | Firmicutes    | Clostridia   | Ruminococcaceae_UCG-014 |                |
| <b>seq769</b>  | Firmicutes    | Clostridia   | Ruminococcaceae_UCG-014 |                |
| <b>seq871</b>  | Firmicutes    | Clostridia   | Ruminococcaceae_UCG-014 |                |
| <b>seq1019</b> | Firmicutes    | Clostridia   | Ruminococcaceae_UCG-014 |                |
| <b>seq1146</b> | Firmicutes    | Clostridia   | Ruminococcaceae_UCG-014 |                |
| <b>seq1182</b> | Firmicutes    | Clostridia   | Ruminococcaceae_UCG-014 |                |
| <b>seq1192</b> | Firmicutes    | Clostridia   | Ruminococcaceae_UCG-014 |                |
| <b>seq1281</b> | Firmicutes    | Clostridia   | Ruminococcaceae_UCG-014 |                |
| <b>seq1390</b> | Firmicutes    | Clostridia   | Ruminococcaceae_UCG-014 |                |
| <b>seq1428</b> | Firmicutes    | Clostridia   | Ruminococcaceae_UCG-014 |                |
| <b>seq1450</b> | Firmicutes    | Clostridia   | Ruminococcaceae_UCG-014 |                |
| <b>seq1471</b> | Firmicutes    | Clostridia   | Ruminococcaceae_UCG-014 |                |
| <b>seq1488</b> | Firmicutes    | Clostridia   | Ruminococcaceae_UCG-014 |                |
| <b>seq1511</b> | Firmicutes    | Clostridia   | Ruminococcaceae_UCG-014 |                |
| <b>seq1518</b> | Firmicutes    | Clostridia   | Ruminococcaceae_UCG-014 |                |

Sequence Count Table

|                | <b>Phylum</b> | <b>Class</b> | <b>Subject34WK0</b> | <b>Subject34WK12</b> | <b>Subject16WK0</b> | <b>Subject16WK12</b> |
|----------------|---------------|--------------|---------------------|----------------------|---------------------|----------------------|
| <b>seq1726</b> | Firmicutes    | Clostridia   | 0                   | 0                    | 0                   | 0                    |
| <b>seq1754</b> | Firmicutes    | Clostridia   | 0                   | 0                    | 0                   | 0                    |
| <b>seq1804</b> | Firmicutes    | Clostridia   | 0                   | 0                    | 0                   | 0                    |
| <b>seq189</b>  | Firmicutes    | Clostridia   | 0                   | 0                    | 0                   | 0                    |
| <b>seq294</b>  | Firmicutes    | Clostridia   | 0                   | 0                    | 0                   | 0                    |
| <b>seq307</b>  | Firmicutes    | Clostridia   | 0                   | 0                    | 0                   | 0                    |
| <b>seq324</b>  | Firmicutes    | Clostridia   | 0                   | 0                    | 0                   | 0                    |
| <b>seq331</b>  | Firmicutes    | Clostridia   | 0                   | 0                    | 339                 | 137                  |
| <b>seq346</b>  | Firmicutes    | Clostridia   | 0                   | 0                    | 0                   | 0                    |
| <b>seq376</b>  | Firmicutes    | Clostridia   | 0                   | 0                    | 0                   | 0                    |
| <b>seq450</b>  | Firmicutes    | Clostridia   | 0                   | 0                    | 324                 | 31                   |
| <b>seq466</b>  | Firmicutes    | Clostridia   | 0                   | 0                    | 0                   | 0                    |
| <b>seq597</b>  | Firmicutes    | Clostridia   | 0                   | 0                    | 0                   | 0                    |
| <b>seq612</b>  | Firmicutes    | Clostridia   | 0                   | 0                    | 0                   | 0                    |
| <b>seq618</b>  | Firmicutes    | Clostridia   | 0                   | 0                    | 0                   | 0                    |
| <b>seq628</b>  | Firmicutes    | Clostridia   | 0                   | 0                    | 0                   | 0                    |
| <b>seq636</b>  | Firmicutes    | Clostridia   | 0                   | 0                    | 0                   | 0                    |
| <b>seq730</b>  | Firmicutes    | Clostridia   | 0                   | 0                    | 0                   | 0                    |
| <b>seq769</b>  | Firmicutes    | Clostridia   | 0                   | 0                    | 0                   | 0                    |
| <b>seq871</b>  | Firmicutes    | Clostridia   | 0                   | 0                    | 0                   | 0                    |
| <b>seq1019</b> | Firmicutes    | Clostridia   | 0                   | 0                    | 0                   | 0                    |
| <b>seq1146</b> | Firmicutes    | Clostridia   | 0                   | 0                    | 0                   | 0                    |
| <b>seq1182</b> | Firmicutes    | Clostridia   | 0                   | 0                    | 0                   | 34                   |
| <b>seq1192</b> | Firmicutes    | Clostridia   | 0                   | 0                    | 0                   | 0                    |
| <b>seq1281</b> | Firmicutes    | Clostridia   | 0                   | 0                    | 0                   | 0                    |
| <b>seq1390</b> | Firmicutes    | Clostridia   | 0                   | 0                    | 0                   | 0                    |
| <b>seq1428</b> | Firmicutes    | Clostridia   | 0                   | 0                    | 0                   | 0                    |
| <b>seq1450</b> | Firmicutes    | Clostridia   | 0                   | 0                    | 0                   | 0                    |
| <b>seq1471</b> | Firmicutes    | Clostridia   | 0                   | 0                    | 0                   | 0                    |
| <b>seq1488</b> | Firmicutes    | Clostridia   | 0                   | 0                    | 0                   | 0                    |
| <b>seq1511</b> | Firmicutes    | Clostridia   | 0                   | 0                    | 0                   | 0                    |
| <b>seq1518</b> | Firmicutes    | Clostridia   | 0                   | 0                    | 0                   | 0                    |



Sequence Count Table

|                | <b>Phylum</b> | <b>Class</b> | <b>Subject17WK0</b> | <b>Subject17WK12</b> | <b>Subject1WK0</b> | <b>Subject1WK12</b> |
|----------------|---------------|--------------|---------------------|----------------------|--------------------|---------------------|
| <b>seq1726</b> | Firmicutes    | Clostridia   | 0                   | 0                    | 0                  | 0                   |
| <b>seq1754</b> | Firmicutes    | Clostridia   | 0                   | 0                    | 0                  | 0                   |
| <b>seq1804</b> | Firmicutes    | Clostridia   | 0                   | 0                    | 0                  | 0                   |
| <b>seq189</b>  | Firmicutes    | Clostridia   | 0                   | 0                    | 0                  | 0                   |
| <b>seq294</b>  | Firmicutes    | Clostridia   | 0                   | 0                    | 0                  | 0                   |
| <b>seq307</b>  | Firmicutes    | Clostridia   | 0                   | 0                    | 0                  | 0                   |
| <b>seq324</b>  | Firmicutes    | Clostridia   | 0                   | 0                    | 0                  | 0                   |
| <b>seq331</b>  | Firmicutes    | Clostridia   | 0                   | 0                    | 0                  | 0                   |
| <b>seq346</b>  | Firmicutes    | Clostridia   | 0                   | 0                    | 0                  | 0                   |
| <b>seq376</b>  | Firmicutes    | Clostridia   | 0                   | 0                    | 92                 | 112                 |
| <b>seq450</b>  | Firmicutes    | Clostridia   | 0                   | 0                    | 0                  | 0                   |
| <b>seq466</b>  | Firmicutes    | Clostridia   | 0                   | 0                    | 0                  | 0                   |
| <b>seq597</b>  | Firmicutes    | Clostridia   | 0                   | 0                    | 0                  | 0                   |
| <b>seq612</b>  | Firmicutes    | Clostridia   | 0                   | 0                    | 0                  | 0                   |
| <b>seq618</b>  | Firmicutes    | Clostridia   | 0                   | 0                    | 0                  | 0                   |
| <b>seq628</b>  | Firmicutes    | Clostridia   | 0                   | 0                    | 0                  | 0                   |
| <b>seq636</b>  | Firmicutes    | Clostridia   | 0                   | 0                    | 0                  | 0                   |
| <b>seq730</b>  | Firmicutes    | Clostridia   | 0                   | 0                    | 0                  | 0                   |
| <b>seq769</b>  | Firmicutes    | Clostridia   | 0                   | 0                    | 0                  | 0                   |
| <b>seq871</b>  | Firmicutes    | Clostridia   | 0                   | 0                    | 0                  | 0                   |
| <b>seq1019</b> | Firmicutes    | Clostridia   | 0                   | 0                    | 0                  | 0                   |
| <b>seq1146</b> | Firmicutes    | Clostridia   | 0                   | 0                    | 0                  | 0                   |
| <b>seq1182</b> | Firmicutes    | Clostridia   | 0                   | 0                    | 0                  | 0                   |
| <b>seq1192</b> | Firmicutes    | Clostridia   | 0                   | 0                    | 0                  | 0                   |
| <b>seq1281</b> | Firmicutes    | Clostridia   | 0                   | 0                    | 0                  | 0                   |
| <b>seq1390</b> | Firmicutes    | Clostridia   | 0                   | 0                    | 0                  | 0                   |
| <b>seq1428</b> | Firmicutes    | Clostridia   | 0                   | 0                    | 0                  | 0                   |
| <b>seq1450</b> | Firmicutes    | Clostridia   | 0                   | 0                    | 0                  | 0                   |
| <b>seq1471</b> | Firmicutes    | Clostridia   | 0                   | 0                    | 0                  | 0                   |
| <b>seq1488</b> | Firmicutes    | Clostridia   | 0                   | 0                    | 0                  | 0                   |
| <b>seq1511</b> | Firmicutes    | Clostridia   | 0                   | 0                    | 0                  | 0                   |
| <b>seq1518</b> | Firmicutes    | Clostridia   | 0                   | 0                    | 0                  | 0                   |

Sequence Count Table

|                | <b>Phylum</b> | <b>Class</b> | <b>Subject2WK0</b> | <b>Subject2WK12</b> | <b>Subject3WK0</b> | <b>Subject3WK12</b> |
|----------------|---------------|--------------|--------------------|---------------------|--------------------|---------------------|
| <b>seq1726</b> | Firmicutes    | Clostridia   | 0                  | 0                   | 0                  | 0                   |
| <b>seq1754</b> | Firmicutes    | Clostridia   | 0                  | 0                   | 0                  | 0                   |
| <b>seq1804</b> | Firmicutes    | Clostridia   | 0                  | 0                   | 0                  | 0                   |
| <b>seq189</b>  | Firmicutes    | Clostridia   | 0                  | 0                   | 0                  | 0                   |
| <b>seq294</b>  | Firmicutes    | Clostridia   | 0                  | 0                   | 0                  | 0                   |
| <b>seq307</b>  | Firmicutes    | Clostridia   | 0                  | 0                   | 0                  | 0                   |
| <b>seq324</b>  | Firmicutes    | Clostridia   | 0                  | 0                   | 0                  | 0                   |
| <b>seq331</b>  | Firmicutes    | Clostridia   | 0                  | 0                   | 0                  | 0                   |
| <b>seq346</b>  | Firmicutes    | Clostridia   | 0                  | 0                   | 0                  | 0                   |
| <b>seq376</b>  | Firmicutes    | Clostridia   | 0                  | 0                   | 0                  | 0                   |
| <b>seq450</b>  | Firmicutes    | Clostridia   | 0                  | 0                   | 0                  | 0                   |
| <b>seq466</b>  | Firmicutes    | Clostridia   | 0                  | 0                   | 0                  | 0                   |
| <b>seq597</b>  | Firmicutes    | Clostridia   | 0                  | 0                   | 0                  | 0                   |
| <b>seq612</b>  | Firmicutes    | Clostridia   | 0                  | 0                   | 0                  | 0                   |
| <b>seq618</b>  | Firmicutes    | Clostridia   | 0                  | 0                   | 0                  | 0                   |
| <b>seq628</b>  | Firmicutes    | Clostridia   | 0                  | 0                   | 0                  | 0                   |
| <b>seq636</b>  | Firmicutes    | Clostridia   | 0                  | 0                   | 0                  | 0                   |
| <b>seq730</b>  | Firmicutes    | Clostridia   | 0                  | 0                   | 0                  | 0                   |
| <b>seq769</b>  | Firmicutes    | Clostridia   | 0                  | 0                   | 0                  | 0                   |
| <b>seq871</b>  | Firmicutes    | Clostridia   | 0                  | 0                   | 0                  | 0                   |
| <b>seq1019</b> | Firmicutes    | Clostridia   | 0                  | 0                   | 0                  | 136                 |
| <b>seq1146</b> | Firmicutes    | Clostridia   | 0                  | 0                   | 0                  | 0                   |
| <b>seq1182</b> | Firmicutes    | Clostridia   | 0                  | 0                   | 0                  | 0                   |
| <b>seq1192</b> | Firmicutes    | Clostridia   | 0                  | 0                   | 0                  | 0                   |
| <b>seq1281</b> | Firmicutes    | Clostridia   | 0                  | 0                   | 0                  | 0                   |
| <b>seq1390</b> | Firmicutes    | Clostridia   | 0                  | 0                   | 0                  | 0                   |
| <b>seq1428</b> | Firmicutes    | Clostridia   | 0                  | 0                   | 0                  | 0                   |
| <b>seq1450</b> | Firmicutes    | Clostridia   | 0                  | 0                   | 0                  | 0                   |
| <b>seq1471</b> | Firmicutes    | Clostridia   | 0                  | 0                   | 0                  | 0                   |
| <b>seq1488</b> | Firmicutes    | Clostridia   | 0                  | 0                   | 0                  | 0                   |
| <b>seq1511</b> | Firmicutes    | Clostridia   | 0                  | 0                   | 0                  | 0                   |
| <b>seq1518</b> | Firmicutes    | Clostridia   | 0                  | 0                   | 0                  | 0                   |

Sequence Count Table

|                | <b>Phylum</b> | <b>Class</b> | <b>Subject4WK0</b> | <b>Subject4WK12</b> | <b>Subject5WK0</b> | <b>Subject5WK12</b> |
|----------------|---------------|--------------|--------------------|---------------------|--------------------|---------------------|
| <b>seq1726</b> | Firmicutes    | Clostridia   | 0                  | 0                   | 0                  | 0                   |
| <b>seq1754</b> | Firmicutes    | Clostridia   | 0                  | 0                   | 0                  | 0                   |
| <b>seq1804</b> | Firmicutes    | Clostridia   | 7                  | 0                   | 0                  | 0                   |
| <b>seq189</b>  | Firmicutes    | Clostridia   | 0                  | 0                   | 0                  | 0                   |
| <b>seq294</b>  | Firmicutes    | Clostridia   | 0                  | 0                   | 0                  | 0                   |
| <b>seq307</b>  | Firmicutes    | Clostridia   | 0                  | 0                   | 0                  | 0                   |
| <b>seq324</b>  | Firmicutes    | Clostridia   | 0                  | 0                   | 0                  | 0                   |
| <b>seq331</b>  | Firmicutes    | Clostridia   | 0                  | 0                   | 0                  | 0                   |
| <b>seq346</b>  | Firmicutes    | Clostridia   | 0                  | 0                   | 0                  | 0                   |
| <b>seq376</b>  | Firmicutes    | Clostridia   | 40                 | 6                   | 0                  | 0                   |
| <b>seq450</b>  | Firmicutes    | Clostridia   | 0                  | 0                   | 0                  | 0                   |
| <b>seq466</b>  | Firmicutes    | Clostridia   | 0                  | 0                   | 0                  | 0                   |
| <b>seq597</b>  | Firmicutes    | Clostridia   | 0                  | 0                   | 0                  | 0                   |
| <b>seq612</b>  | Firmicutes    | Clostridia   | 0                  | 0                   | 0                  | 0                   |
| <b>seq618</b>  | Firmicutes    | Clostridia   | 0                  | 0                   | 0                  | 0                   |
| <b>seq628</b>  | Firmicutes    | Clostridia   | 0                  | 0                   | 0                  | 0                   |
| <b>seq636</b>  | Firmicutes    | Clostridia   | 0                  | 0                   | 0                  | 0                   |
| <b>seq730</b>  | Firmicutes    | Clostridia   | 0                  | 0                   | 0                  | 0                   |
| <b>seq769</b>  | Firmicutes    | Clostridia   | 0                  | 0                   | 0                  | 0                   |
| <b>seq871</b>  | Firmicutes    | Clostridia   | 0                  | 11                  | 0                  | 0                   |
| <b>seq1019</b> | Firmicutes    | Clostridia   | 0                  | 0                   | 0                  | 0                   |
| <b>seq1146</b> | Firmicutes    | Clostridia   | 0                  | 0                   | 0                  | 0                   |
| <b>seq1182</b> | Firmicutes    | Clostridia   | 0                  | 0                   | 0                  | 0                   |
| <b>seq1192</b> | Firmicutes    | Clostridia   | 0                  | 0                   | 0                  | 0                   |
| <b>seq1281</b> | Firmicutes    | Clostridia   | 0                  | 0                   | 0                  | 0                   |
| <b>seq1390</b> | Firmicutes    | Clostridia   | 0                  | 0                   | 0                  | 0                   |
| <b>seq1428</b> | Firmicutes    | Clostridia   | 0                  | 0                   | 0                  | 0                   |
| <b>seq1450</b> | Firmicutes    | Clostridia   | 0                  | 0                   | 0                  | 0                   |
| <b>seq1471</b> | Firmicutes    | Clostridia   | 0                  | 0                   | 0                  | 0                   |
| <b>seq1488</b> | Firmicutes    | Clostridia   | 0                  | 0                   | 0                  | 0                   |
| <b>seq1511</b> | Firmicutes    | Clostridia   | 0                  | 0                   | 0                  | 0                   |
| <b>seq1518</b> | Firmicutes    | Clostridia   | 0                  | 0                   | 0                  | 0                   |

Sequence Count Table

|                | <b>Phylum</b> | <b>Class</b> | <b>Subject6WK0</b> | <b>Subject6WK12</b> | <b>Subject18WK0</b> | <b>Subject18WK12</b> |
|----------------|---------------|--------------|--------------------|---------------------|---------------------|----------------------|
| <b>seq1726</b> | Firmicutes    | Clostridia   | 0                  | 0                   | 0                   | 0                    |
| <b>seq1754</b> | Firmicutes    | Clostridia   | 0                  | 0                   | 0                   | 0                    |
| <b>seq1804</b> | Firmicutes    | Clostridia   | 0                  | 0                   | 0                   | 0                    |
| <b>seq189</b>  | Firmicutes    | Clostridia   | 51                 | 4461                | 0                   | 0                    |
| <b>seq294</b>  | Firmicutes    | Clostridia   | 0                  | 0                   | 0                   | 0                    |
| <b>seq307</b>  | Firmicutes    | Clostridia   | 1359               | 215                 | 0                   | 0                    |
| <b>seq324</b>  | Firmicutes    | Clostridia   | 682                | 1267                | 0                   | 0                    |
| <b>seq331</b>  | Firmicutes    | Clostridia   | 422                | 250                 | 0                   | 0                    |
| <b>seq346</b>  | Firmicutes    | Clostridia   | 1408               | 193                 | 0                   | 0                    |
| <b>seq376</b>  | Firmicutes    | Clostridia   | 0                  | 0                   | 0                   | 0                    |
| <b>seq450</b>  | Firmicutes    | Clostridia   | 153                | 205                 | 0                   | 0                    |
| <b>seq466</b>  | Firmicutes    | Clostridia   | 192                | 253                 | 0                   | 0                    |
| <b>seq597</b>  | Firmicutes    | Clostridia   | 535                | 0                   | 0                   | 0                    |
| <b>seq612</b>  | Firmicutes    | Clostridia   | 0                  | 0                   | 0                   | 0                    |
| <b>seq618</b>  | Firmicutes    | Clostridia   | 0                  | 0                   | 0                   | 0                    |
| <b>seq628</b>  | Firmicutes    | Clostridia   | 0                  | 0                   | 0                   | 0                    |
| <b>seq636</b>  | Firmicutes    | Clostridia   | 0                  | 0                   | 0                   | 0                    |
| <b>seq730</b>  | Firmicutes    | Clostridia   | 244                | 82                  | 0                   | 0                    |
| <b>seq769</b>  | Firmicutes    | Clostridia   | 0                  | 0                   | 0                   | 0                    |
| <b>seq871</b>  | Firmicutes    | Clostridia   | 0                  | 0                   | 0                   | 0                    |
| <b>seq1019</b> | Firmicutes    | Clostridia   | 0                  | 0                   | 0                   | 0                    |
| <b>seq1146</b> | Firmicutes    | Clostridia   | 0                  | 0                   | 0                   | 0                    |
| <b>seq1182</b> | Firmicutes    | Clostridia   | 0                  | 0                   | 0                   | 0                    |
| <b>seq1192</b> | Firmicutes    | Clostridia   | 0                  | 0                   | 0                   | 0                    |
| <b>seq1281</b> | Firmicutes    | Clostridia   | 0                  | 0                   | 0                   | 0                    |
| <b>seq1390</b> | Firmicutes    | Clostridia   | 0                  | 0                   | 0                   | 0                    |
| <b>seq1428</b> | Firmicutes    | Clostridia   | 0                  | 0                   | 0                   | 0                    |
| <b>seq1450</b> | Firmicutes    | Clostridia   | 0                  | 0                   | 0                   | 0                    |
| <b>seq1471</b> | Firmicutes    | Clostridia   | 0                  | 0                   | 0                   | 0                    |
| <b>seq1488</b> | Firmicutes    | Clostridia   | 0                  | 0                   | 0                   | 0                    |
| <b>seq1511</b> | Firmicutes    | Clostridia   | 0                  | 27                  | 0                   | 0                    |
| <b>seq1518</b> | Firmicutes    | Clostridia   | 0                  | 0                   | 0                   | 0                    |

Sequence Count Table

|                | <b>Phylum</b> | <b>Class</b> | <b>Subject19WK0</b> | <b>Subject19WK12</b> | <b>Subject20WK0</b> | <b>Subject20WK12</b> |
|----------------|---------------|--------------|---------------------|----------------------|---------------------|----------------------|
| <b>seq1726</b> | Firmicutes    | Clostridia   | 0                   | 0                    | 8                   | 3                    |
| <b>seq1754</b> | Firmicutes    | Clostridia   | 0                   | 0                    | 0                   | 0                    |
| <b>seq1804</b> | Firmicutes    | Clostridia   | 0                   | 0                    | 0                   | 0                    |
| <b>seq189</b>  | Firmicutes    | Clostridia   | 0                   | 0                    | 519                 | 86                   |
| <b>seq294</b>  | Firmicutes    | Clostridia   | 0                   | 0                    | 178                 | 436                  |
| <b>seq307</b>  | Firmicutes    | Clostridia   | 0                   | 0                    | 28                  | 12                   |
| <b>seq324</b>  | Firmicutes    | Clostridia   | 0                   | 0                    | 0                   | 0                    |
| <b>seq331</b>  | Firmicutes    | Clostridia   | 0                   | 0                    | 94                  | 143                  |
| <b>seq346</b>  | Firmicutes    | Clostridia   | 0                   | 0                    | 0                   | 0                    |
| <b>seq376</b>  | Firmicutes    | Clostridia   | 0                   | 0                    | 0                   | 0                    |
| <b>seq450</b>  | Firmicutes    | Clostridia   | 0                   | 0                    | 0                   | 0                    |
| <b>seq466</b>  | Firmicutes    | Clostridia   | 0                   | 0                    | 0                   | 0                    |
| <b>seq597</b>  | Firmicutes    | Clostridia   | 0                   | 0                    | 0                   | 0                    |
| <b>seq612</b>  | Firmicutes    | Clostridia   | 0                   | 0                    | 0                   | 0                    |
| <b>seq618</b>  | Firmicutes    | Clostridia   | 0                   | 0                    | 0                   | 0                    |
| <b>seq628</b>  | Firmicutes    | Clostridia   | 0                   | 0                    | 0                   | 0                    |
| <b>seq636</b>  | Firmicutes    | Clostridia   | 0                   | 0                    | 0                   | 0                    |
| <b>seq730</b>  | Firmicutes    | Clostridia   | 0                   | 0                    | 0                   | 12                   |
| <b>seq769</b>  | Firmicutes    | Clostridia   | 0                   | 0                    | 0                   | 0                    |
| <b>seq871</b>  | Firmicutes    | Clostridia   | 0                   | 0                    | 0                   | 0                    |
| <b>seq1019</b> | Firmicutes    | Clostridia   | 0                   | 0                    | 0                   | 0                    |
| <b>seq1146</b> | Firmicutes    | Clostridia   | 0                   | 0                    | 0                   | 0                    |
| <b>seq1182</b> | Firmicutes    | Clostridia   | 0                   | 0                    | 51                  | 0                    |
| <b>seq1192</b> | Firmicutes    | Clostridia   | 0                   | 0                    | 0                   | 54                   |
| <b>seq1281</b> | Firmicutes    | Clostridia   | 0                   | 0                    | 0                   | 61                   |
| <b>seq1390</b> | Firmicutes    | Clostridia   | 0                   | 0                    | 0                   | 0                    |
| <b>seq1428</b> | Firmicutes    | Clostridia   | 0                   | 0                    | 0                   | 0                    |
| <b>seq1450</b> | Firmicutes    | Clostridia   | 0                   | 0                    | 0                   | 0                    |
| <b>seq1471</b> | Firmicutes    | Clostridia   | 0                   | 0                    | 0                   | 0                    |
| <b>seq1488</b> | Firmicutes    | Clostridia   | 0                   | 0                    | 0                   | 0                    |
| <b>seq1511</b> | Firmicutes    | Clostridia   | 0                   | 0                    | 0                   | 0                    |
| <b>seq1518</b> | Firmicutes    | Clostridia   | 0                   | 0                    | 0                   | 0                    |

Sequence Count Table

|                | <b>Phylum</b> | <b>Class</b> | <b>Subject7WK0</b> | <b>Subject7WK12</b> | <b>Subject21WK0</b> | <b>Subject21WK12</b> |
|----------------|---------------|--------------|--------------------|---------------------|---------------------|----------------------|
| <b>seq1726</b> | Firmicutes    | Clostridia   | 0                  | 0                   | 0                   | 0                    |
| <b>seq1754</b> | Firmicutes    | Clostridia   | 0                  | 0                   | 0                   | 0                    |
| <b>seq1804</b> | Firmicutes    | Clostridia   | 0                  | 0                   | 0                   | 0                    |
| <b>seq189</b>  | Firmicutes    | Clostridia   | 0                  | 0                   | 0                   | 0                    |
| <b>seq294</b>  | Firmicutes    | Clostridia   | 0                  | 0                   | 0                   | 0                    |
| <b>seq307</b>  | Firmicutes    | Clostridia   | 0                  | 0                   | 0                   | 0                    |
| <b>seq324</b>  | Firmicutes    | Clostridia   | 0                  | 0                   | 0                   | 0                    |
| <b>seq331</b>  | Firmicutes    | Clostridia   | 0                  | 0                   | 0                   | 0                    |
| <b>seq346</b>  | Firmicutes    | Clostridia   | 0                  | 0                   | 0                   | 0                    |
| <b>seq376</b>  | Firmicutes    | Clostridia   | 0                  | 0                   | 0                   | 0                    |
| <b>seq450</b>  | Firmicutes    | Clostridia   | 0                  | 0                   | 0                   | 0                    |
| <b>seq466</b>  | Firmicutes    | Clostridia   | 0                  | 0                   | 0                   | 0                    |
| <b>seq597</b>  | Firmicutes    | Clostridia   | 0                  | 0                   | 0                   | 0                    |
| <b>seq612</b>  | Firmicutes    | Clostridia   | 0                  | 0                   | 0                   | 0                    |
| <b>seq618</b>  | Firmicutes    | Clostridia   | 0                  | 0                   | 0                   | 0                    |
| <b>seq628</b>  | Firmicutes    | Clostridia   | 0                  | 0                   | 0                   | 0                    |
| <b>seq636</b>  | Firmicutes    | Clostridia   | 0                  | 0                   | 0                   | 0                    |
| <b>seq730</b>  | Firmicutes    | Clostridia   | 0                  | 0                   | 0                   | 0                    |
| <b>seq769</b>  | Firmicutes    | Clostridia   | 0                  | 0                   | 0                   | 0                    |
| <b>seq871</b>  | Firmicutes    | Clostridia   | 0                  | 0                   | 0                   | 0                    |
| <b>seq1019</b> | Firmicutes    | Clostridia   | 0                  | 0                   | 0                   | 0                    |
| <b>seq1146</b> | Firmicutes    | Clostridia   | 0                  | 0                   | 0                   | 0                    |
| <b>seq1182</b> | Firmicutes    | Clostridia   | 0                  | 0                   | 0                   | 0                    |
| <b>seq1192</b> | Firmicutes    | Clostridia   | 0                  | 0                   | 0                   | 0                    |
| <b>seq1281</b> | Firmicutes    | Clostridia   | 0                  | 0                   | 0                   | 0                    |
| <b>seq1390</b> | Firmicutes    | Clostridia   | 0                  | 0                   | 0                   | 0                    |
| <b>seq1428</b> | Firmicutes    | Clostridia   | 0                  | 0                   | 0                   | 0                    |
| <b>seq1450</b> | Firmicutes    | Clostridia   | 0                  | 0                   | 0                   | 0                    |
| <b>seq1471</b> | Firmicutes    | Clostridia   | 0                  | 0                   | 0                   | 0                    |
| <b>seq1488</b> | Firmicutes    | Clostridia   | 0                  | 0                   | 0                   | 0                    |
| <b>seq1511</b> | Firmicutes    | Clostridia   | 0                  | 0                   | 0                   | 0                    |
| <b>seq1518</b> | Firmicutes    | Clostridia   | 0                  | 0                   | 0                   | 0                    |

Sequence Count Table

|                | <b>Phylum</b> | <b>Class</b> | <b>Subject8WK0</b> | <b>Subject8WK12</b> | <b>Subject9WK0</b> | <b>Subject9WK12</b> |
|----------------|---------------|--------------|--------------------|---------------------|--------------------|---------------------|
| <b>seq1726</b> | Firmicutes    | Clostridia   | 0                  | 0                   | 0                  | 0                   |
| <b>seq1754</b> | Firmicutes    | Clostridia   | 0                  | 0                   | 0                  | 0                   |
| <b>seq1804</b> | Firmicutes    | Clostridia   | 0                  | 0                   | 0                  | 0                   |
| <b>seq189</b>  | Firmicutes    | Clostridia   | 0                  | 0                   | 0                  | 0                   |
| <b>seq294</b>  | Firmicutes    | Clostridia   | 0                  | 0                   | 0                  | 0                   |
| <b>seq307</b>  | Firmicutes    | Clostridia   | 0                  | 0                   | 0                  | 0                   |
| <b>seq324</b>  | Firmicutes    | Clostridia   | 0                  | 0                   | 0                  | 0                   |
| <b>seq331</b>  | Firmicutes    | Clostridia   | 0                  | 0                   | 0                  | 0                   |
| <b>seq346</b>  | Firmicutes    | Clostridia   | 0                  | 0                   | 0                  | 0                   |
| <b>seq376</b>  | Firmicutes    | Clostridia   | 0                  | 0                   | 0                  | 0                   |
| <b>seq450</b>  | Firmicutes    | Clostridia   | 0                  | 0                   | 0                  | 0                   |
| <b>seq466</b>  | Firmicutes    | Clostridia   | 0                  | 0                   | 0                  | 0                   |
| <b>seq597</b>  | Firmicutes    | Clostridia   | 0                  | 0                   | 0                  | 0                   |
| <b>seq612</b>  | Firmicutes    | Clostridia   | 0                  | 0                   | 0                  | 0                   |
| <b>seq618</b>  | Firmicutes    | Clostridia   | 0                  | 0                   | 0                  | 0                   |
| <b>seq628</b>  | Firmicutes    | Clostridia   | 0                  | 0                   | 0                  | 0                   |
| <b>seq636</b>  | Firmicutes    | Clostridia   | 0                  | 0                   | 0                  | 0                   |
| <b>seq730</b>  | Firmicutes    | Clostridia   | 0                  | 0                   | 0                  | 0                   |
| <b>seq769</b>  | Firmicutes    | Clostridia   | 0                  | 0                   | 0                  | 0                   |
| <b>seq871</b>  | Firmicutes    | Clostridia   | 0                  | 0                   | 0                  | 0                   |
| <b>seq1019</b> | Firmicutes    | Clostridia   | 0                  | 0                   | 0                  | 0                   |
| <b>seq1146</b> | Firmicutes    | Clostridia   | 0                  | 0                   | 0                  | 0                   |
| <b>seq1182</b> | Firmicutes    | Clostridia   | 0                  | 0                   | 0                  | 0                   |
| <b>seq1192</b> | Firmicutes    | Clostridia   | 0                  | 0                   | 0                  | 0                   |
| <b>seq1281</b> | Firmicutes    | Clostridia   | 0                  | 0                   | 0                  | 0                   |
| <b>seq1390</b> | Firmicutes    | Clostridia   | 0                  | 0                   | 0                  | 0                   |
| <b>seq1428</b> | Firmicutes    | Clostridia   | 0                  | 0                   | 0                  | 0                   |
| <b>seq1450</b> | Firmicutes    | Clostridia   | 0                  | 0                   | 0                  | 0                   |
| <b>seq1471</b> | Firmicutes    | Clostridia   | 0                  | 0                   | 0                  | 0                   |
| <b>seq1488</b> | Firmicutes    | Clostridia   | 0                  | 0                   | 0                  | 0                   |
| <b>seq1511</b> | Firmicutes    | Clostridia   | 0                  | 0                   | 0                  | 0                   |
| <b>seq1518</b> | Firmicutes    | Clostridia   | 0                  | 0                   | 0                  | 0                   |

Sequence Count Table

|                | <b>Phylum</b> | <b>Class</b> | <b>Subject10WK0</b> | <b>Subject10WK12</b> | <b>Subject22WK0</b> | <b>Subject22WK12</b> |
|----------------|---------------|--------------|---------------------|----------------------|---------------------|----------------------|
| <b>seq1726</b> | Firmicutes    | Clostridia   | 0                   | 0                    | 0                   | 0                    |
| <b>seq1754</b> | Firmicutes    | Clostridia   | 0                   | 0                    | 0                   | 10                   |
| <b>seq1804</b> | Firmicutes    | Clostridia   | 0                   | 0                    | 0                   | 0                    |
| <b>seq189</b>  | Firmicutes    | Clostridia   | 0                   | 0                    | 381                 | 227                  |
| <b>seq294</b>  | Firmicutes    | Clostridia   | 0                   | 0                    | 69                  | 13                   |
| <b>seq307</b>  | Firmicutes    | Clostridia   | 0                   | 0                    | 0                   | 0                    |
| <b>seq324</b>  | Firmicutes    | Clostridia   | 0                   | 0                    | 0                   | 0                    |
| <b>seq331</b>  | Firmicutes    | Clostridia   | 0                   | 0                    | 220                 | 98                   |
| <b>seq346</b>  | Firmicutes    | Clostridia   | 0                   | 0                    | 0                   | 0                    |
| <b>seq376</b>  | Firmicutes    | Clostridia   | 894                 | 258                  | 0                   | 0                    |
| <b>seq450</b>  | Firmicutes    | Clostridia   | 0                   | 0                    | 0                   | 0                    |
| <b>seq466</b>  | Firmicutes    | Clostridia   | 0                   | 0                    | 0                   | 0                    |
| <b>seq597</b>  | Firmicutes    | Clostridia   | 0                   | 0                    | 0                   | 0                    |
| <b>seq612</b>  | Firmicutes    | Clostridia   | 0                   | 0                    | 307                 | 202                  |
| <b>seq618</b>  | Firmicutes    | Clostridia   | 300                 | 6                    | 0                   | 0                    |
| <b>seq628</b>  | Firmicutes    | Clostridia   | 0                   | 0                    | 0                   | 0                    |
| <b>seq636</b>  | Firmicutes    | Clostridia   | 0                   | 0                    | 0                   | 0                    |
| <b>seq730</b>  | Firmicutes    | Clostridia   | 0                   | 0                    | 0                   | 0                    |
| <b>seq769</b>  | Firmicutes    | Clostridia   | 0                   | 0                    | 198                 | 100                  |
| <b>seq871</b>  | Firmicutes    | Clostridia   | 0                   | 0                    | 0                   | 0                    |
| <b>seq1019</b> | Firmicutes    | Clostridia   | 0                   | 0                    | 0                   | 0                    |
| <b>seq1146</b> | Firmicutes    | Clostridia   | 0                   | 0                    | 40                  | 53                   |
| <b>seq1182</b> | Firmicutes    | Clostridia   | 0                   | 0                    | 0                   | 0                    |
| <b>seq1192</b> | Firmicutes    | Clostridia   | 0                   | 0                    | 0                   | 29                   |
| <b>seq1281</b> | Firmicutes    | Clostridia   | 0                   | 0                    | 0                   | 0                    |
| <b>seq1390</b> | Firmicutes    | Clostridia   | 0                   | 0                    | 0                   | 43                   |
| <b>seq1428</b> | Firmicutes    | Clostridia   | 0                   | 0                    | 13                  | 25                   |
| <b>seq1450</b> | Firmicutes    | Clostridia   | 0                   | 0                    | 34                  | 0                    |
| <b>seq1471</b> | Firmicutes    | Clostridia   | 0                   | 0                    | 0                   | 0                    |
| <b>seq1488</b> | Firmicutes    | Clostridia   | 0                   | 0                    | 30                  | 0                    |
| <b>seq1511</b> | Firmicutes    | Clostridia   | 0                   | 0                    | 0                   | 0                    |
| <b>seq1518</b> | Firmicutes    | Clostridia   | 0                   | 0                    | 0                   | 27                   |



Sequence Count Table

|                | <b>Phylum</b> | <b>Class</b> | <b>Subject23WK0</b> | <b>Subject23WK12</b> | <b>Subject24WK0</b> | <b>Subject24WK12</b> |
|----------------|---------------|--------------|---------------------|----------------------|---------------------|----------------------|
| <b>seq1726</b> | Firmicutes    | Clostridia   | 0                   | 0                    | 0                   | 0                    |
| <b>seq1754</b> | Firmicutes    | Clostridia   | 0                   | 0                    | 0                   | 0                    |
| <b>seq1804</b> | Firmicutes    | Clostridia   | 0                   | 0                    | 0                   | 0                    |
| <b>seq189</b>  | Firmicutes    | Clostridia   | 0                   | 0                    | 0                   | 0                    |
| <b>seq294</b>  | Firmicutes    | Clostridia   | 548                 | 1096                 | 0                   | 0                    |
| <b>seq307</b>  | Firmicutes    | Clostridia   | 0                   | 0                    | 0                   | 0                    |
| <b>seq324</b>  | Firmicutes    | Clostridia   | 0                   | 0                    | 0                   | 0                    |
| <b>seq331</b>  | Firmicutes    | Clostridia   | 0                   | 0                    | 0                   | 0                    |
| <b>seq346</b>  | Firmicutes    | Clostridia   | 0                   | 0                    | 0                   | 0                    |
| <b>seq376</b>  | Firmicutes    | Clostridia   | 0                   | 0                    | 0                   | 0                    |
| <b>seq450</b>  | Firmicutes    | Clostridia   | 0                   | 0                    | 0                   | 0                    |
| <b>seq466</b>  | Firmicutes    | Clostridia   | 0                   | 0                    | 0                   | 0                    |
| <b>seq597</b>  | Firmicutes    | Clostridia   | 0                   | 0                    | 0                   | 0                    |
| <b>seq612</b>  | Firmicutes    | Clostridia   | 0                   | 0                    | 0                   | 0                    |
| <b>seq618</b>  | Firmicutes    | Clostridia   | 0                   | 0                    | 0                   | 0                    |
| <b>seq628</b>  | Firmicutes    | Clostridia   | 0                   | 0                    | 0                   | 0                    |
| <b>seq636</b>  | Firmicutes    | Clostridia   | 0                   | 0                    | 0                   | 0                    |
| <b>seq730</b>  | Firmicutes    | Clostridia   | 0                   | 0                    | 0                   | 0                    |
| <b>seq769</b>  | Firmicutes    | Clostridia   | 0                   | 0                    | 0                   | 0                    |
| <b>seq871</b>  | Firmicutes    | Clostridia   | 0                   | 0                    | 0                   | 0                    |
| <b>seq1019</b> | Firmicutes    | Clostridia   | 0                   | 0                    | 0                   | 0                    |
| <b>seq1146</b> | Firmicutes    | Clostridia   | 0                   | 0                    | 0                   | 0                    |
| <b>seq1182</b> | Firmicutes    | Clostridia   | 0                   | 0                    | 0                   | 0                    |
| <b>seq1192</b> | Firmicutes    | Clostridia   | 0                   | 0                    | 0                   | 0                    |
| <b>seq1281</b> | Firmicutes    | Clostridia   | 0                   | 0                    | 0                   | 0                    |
| <b>seq1390</b> | Firmicutes    | Clostridia   | 0                   | 0                    | 0                   | 0                    |
| <b>seq1428</b> | Firmicutes    | Clostridia   | 0                   | 0                    | 0                   | 0                    |
| <b>seq1450</b> | Firmicutes    | Clostridia   | 0                   | 0                    | 0                   | 0                    |
| <b>seq1471</b> | Firmicutes    | Clostridia   | 0                   | 0                    | 32                  | 0                    |
| <b>seq1488</b> | Firmicutes    | Clostridia   | 0                   | 0                    | 0                   | 0                    |
| <b>seq1511</b> | Firmicutes    | Clostridia   | 0                   | 0                    | 0                   | 0                    |
| <b>seq1518</b> | Firmicutes    | Clostridia   | 0                   | 0                    | 0                   | 0                    |

Sequence Count Table

|                | <b>Phylum</b> | <b>Class</b> | <b>Subject11WK0</b> | <b>Subject11WK12</b> | <b>Subject12WK0</b> | <b>Subject12WK12</b> |
|----------------|---------------|--------------|---------------------|----------------------|---------------------|----------------------|
| <b>seq1726</b> | Firmicutes    | Clostridia   | 0                   | 0                    | 0                   | 0                    |
| <b>seq1754</b> | Firmicutes    | Clostridia   | 0                   | 0                    | 0                   | 0                    |
| <b>seq1804</b> | Firmicutes    | Clostridia   | 0                   | 0                    | 0                   | 0                    |
| <b>seq189</b>  | Firmicutes    | Clostridia   | 0                   | 0                    | 0                   | 0                    |
| <b>seq294</b>  | Firmicutes    | Clostridia   | 0                   | 0                    | 0                   | 0                    |
| <b>seq307</b>  | Firmicutes    | Clostridia   | 0                   | 0                    | 0                   | 0                    |
| <b>seq324</b>  | Firmicutes    | Clostridia   | 0                   | 0                    | 0                   | 0                    |
| <b>seq331</b>  | Firmicutes    | Clostridia   | 0                   | 0                    | 0                   | 0                    |
| <b>seq346</b>  | Firmicutes    | Clostridia   | 0                   | 0                    | 0                   | 0                    |
| <b>seq376</b>  | Firmicutes    | Clostridia   | 0                   | 0                    | 0                   | 0                    |
| <b>seq450</b>  | Firmicutes    | Clostridia   | 0                   | 0                    | 0                   | 0                    |
| <b>seq466</b>  | Firmicutes    | Clostridia   | 0                   | 0                    | 0                   | 0                    |
| <b>seq597</b>  | Firmicutes    | Clostridia   | 0                   | 0                    | 0                   | 0                    |
| <b>seq612</b>  | Firmicutes    | Clostridia   | 0                   | 0                    | 0                   | 0                    |
| <b>seq618</b>  | Firmicutes    | Clostridia   | 132                 | 64                   | 0                   | 0                    |
| <b>seq628</b>  | Firmicutes    | Clostridia   | 0                   | 0                    | 0                   | 0                    |
| <b>seq636</b>  | Firmicutes    | Clostridia   | 0                   | 0                    | 0                   | 0                    |
| <b>seq730</b>  | Firmicutes    | Clostridia   | 0                   | 0                    | 0                   | 0                    |
| <b>seq769</b>  | Firmicutes    | Clostridia   | 0                   | 0                    | 0                   | 0                    |
| <b>seq871</b>  | Firmicutes    | Clostridia   | 0                   | 0                    | 0                   | 0                    |
| <b>seq1019</b> | Firmicutes    | Clostridia   | 0                   | 0                    | 0                   | 0                    |
| <b>seq1146</b> | Firmicutes    | Clostridia   | 0                   | 0                    | 0                   | 0                    |
| <b>seq1182</b> | Firmicutes    | Clostridia   | 0                   | 0                    | 0                   | 0                    |
| <b>seq1192</b> | Firmicutes    | Clostridia   | 0                   | 0                    | 0                   | 0                    |
| <b>seq1281</b> | Firmicutes    | Clostridia   | 0                   | 0                    | 0                   | 0                    |
| <b>seq1390</b> | Firmicutes    | Clostridia   | 0                   | 0                    | 0                   | 0                    |
| <b>seq1428</b> | Firmicutes    | Clostridia   | 0                   | 0                    | 0                   | 0                    |
| <b>seq1450</b> | Firmicutes    | Clostridia   | 0                   | 0                    | 0                   | 0                    |
| <b>seq1471</b> | Firmicutes    | Clostridia   | 0                   | 0                    | 0                   | 0                    |
| <b>seq1488</b> | Firmicutes    | Clostridia   | 0                   | 0                    | 0                   | 0                    |
| <b>seq1511</b> | Firmicutes    | Clostridia   | 0                   | 0                    | 0                   | 0                    |
| <b>seq1518</b> | Firmicutes    | Clostridia   | 0                   | 0                    | 0                   | 0                    |

Sequence Count Table

|                | <b>Phylum</b> | <b>Class</b> | <b>Subject25WK0</b> | <b>Subject25WK12</b> | <b>Subject38WK0</b> | <b>Subject38WK12</b> |
|----------------|---------------|--------------|---------------------|----------------------|---------------------|----------------------|
| <b>seq1726</b> | Firmicutes    | Clostridia   | 0                   | 0                    | 0                   | 0                    |
| <b>seq1754</b> | Firmicutes    | Clostridia   | 0                   | 0                    | 0                   | 0                    |
| <b>seq1804</b> | Firmicutes    | Clostridia   | 0                   | 0                    | 0                   | 0                    |
| <b>seq189</b>  | Firmicutes    | Clostridia   | 0                   | 0                    | 0                   | 0                    |
| <b>seq294</b>  | Firmicutes    | Clostridia   | 0                   | 0                    | 0                   | 0                    |
| <b>seq307</b>  | Firmicutes    | Clostridia   | 0                   | 0                    | 0                   | 0                    |
| <b>seq324</b>  | Firmicutes    | Clostridia   | 0                   | 0                    | 0                   | 0                    |
| <b>seq331</b>  | Firmicutes    | Clostridia   | 0                   | 0                    | 0                   | 0                    |
| <b>seq346</b>  | Firmicutes    | Clostridia   | 0                   | 0                    | 0                   | 0                    |
| <b>seq376</b>  | Firmicutes    | Clostridia   | 0                   | 0                    | 0                   | 0                    |
| <b>seq450</b>  | Firmicutes    | Clostridia   | 0                   | 0                    | 0                   | 0                    |
| <b>seq466</b>  | Firmicutes    | Clostridia   | 0                   | 0                    | 0                   | 0                    |
| <b>seq597</b>  | Firmicutes    | Clostridia   | 0                   | 0                    | 0                   | 0                    |
| <b>seq612</b>  | Firmicutes    | Clostridia   | 0                   | 0                    | 0                   | 0                    |
| <b>seq618</b>  | Firmicutes    | Clostridia   | 0                   | 0                    | 0                   | 0                    |
| <b>seq628</b>  | Firmicutes    | Clostridia   | 0                   | 0                    | 0                   | 0                    |
| <b>seq636</b>  | Firmicutes    | Clostridia   | 0                   | 0                    | 0                   | 0                    |
| <b>seq730</b>  | Firmicutes    | Clostridia   | 0                   | 0                    | 0                   | 0                    |
| <b>seq769</b>  | Firmicutes    | Clostridia   | 0                   | 0                    | 0                   | 0                    |
| <b>seq871</b>  | Firmicutes    | Clostridia   | 0                   | 0                    | 0                   | 0                    |
| <b>seq1019</b> | Firmicutes    | Clostridia   | 0                   | 0                    | 0                   | 0                    |
| <b>seq1146</b> | Firmicutes    | Clostridia   | 0                   | 0                    | 0                   | 0                    |
| <b>seq1182</b> | Firmicutes    | Clostridia   | 0                   | 0                    | 0                   | 0                    |
| <b>seq1192</b> | Firmicutes    | Clostridia   | 0                   | 0                    | 0                   | 0                    |
| <b>seq1281</b> | Firmicutes    | Clostridia   | 0                   | 0                    | 0                   | 0                    |
| <b>seq1390</b> | Firmicutes    | Clostridia   | 0                   | 0                    | 0                   | 0                    |
| <b>seq1428</b> | Firmicutes    | Clostridia   | 0                   | 0                    | 0                   | 0                    |
| <b>seq1450</b> | Firmicutes    | Clostridia   | 0                   | 0                    | 0                   | 0                    |
| <b>seq1471</b> | Firmicutes    | Clostridia   | 0                   | 0                    | 0                   | 0                    |
| <b>seq1488</b> | Firmicutes    | Clostridia   | 0                   | 0                    | 0                   | 0                    |
| <b>seq1511</b> | Firmicutes    | Clostridia   | 0                   | 0                    | 0                   | 0                    |
| <b>seq1518</b> | Firmicutes    | Clostridia   | 0                   | 0                    | 0                   | 0                    |

Sequence Count Table

|                | <b>Phylum</b> | <b>Class</b> | <b>Subject31WK0</b> | <b>Subject31WK12</b> | <b>Subject32WK0</b> | <b>Subject32WK12</b> |
|----------------|---------------|--------------|---------------------|----------------------|---------------------|----------------------|
| <b>seq1726</b> | Firmicutes    | Clostridia   | 0                   | 0                    | 0                   | 0                    |
| <b>seq1754</b> | Firmicutes    | Clostridia   | 0                   | 0                    | 0                   | 0                    |
| <b>seq1804</b> | Firmicutes    | Clostridia   | 0                   | 0                    | 0                   | 0                    |
| <b>seq189</b>  | Firmicutes    | Clostridia   | 0                   | 0                    | 0                   | 0                    |
| <b>seq294</b>  | Firmicutes    | Clostridia   | 0                   | 0                    | 0                   | 0                    |
| <b>seq307</b>  | Firmicutes    | Clostridia   | 0                   | 0                    | 0                   | 0                    |
| <b>seq324</b>  | Firmicutes    | Clostridia   | 0                   | 0                    | 0                   | 0                    |
| <b>seq331</b>  | Firmicutes    | Clostridia   | 0                   | 0                    | 0                   | 0                    |
| <b>seq346</b>  | Firmicutes    | Clostridia   | 0                   | 0                    | 0                   | 0                    |
| <b>seq376</b>  | Firmicutes    | Clostridia   | 0                   | 0                    | 0                   | 0                    |
| <b>seq450</b>  | Firmicutes    | Clostridia   | 0                   | 0                    | 0                   | 0                    |
| <b>seq466</b>  | Firmicutes    | Clostridia   | 0                   | 0                    | 0                   | 0                    |
| <b>seq597</b>  | Firmicutes    | Clostridia   | 0                   | 0                    | 0                   | 0                    |
| <b>seq612</b>  | Firmicutes    | Clostridia   | 0                   | 0                    | 0                   | 0                    |
| <b>seq618</b>  | Firmicutes    | Clostridia   | 0                   | 0                    | 0                   | 0                    |
| <b>seq628</b>  | Firmicutes    | Clostridia   | 0                   | 0                    | 0                   | 0                    |
| <b>seq636</b>  | Firmicutes    | Clostridia   | 0                   | 0                    | 0                   | 0                    |
| <b>seq730</b>  | Firmicutes    | Clostridia   | 0                   | 0                    | 0                   | 0                    |
| <b>seq769</b>  | Firmicutes    | Clostridia   | 0                   | 0                    | 0                   | 0                    |
| <b>seq871</b>  | Firmicutes    | Clostridia   | 0                   | 0                    | 0                   | 0                    |
| <b>seq1019</b> | Firmicutes    | Clostridia   | 0                   | 0                    | 0                   | 0                    |
| <b>seq1146</b> | Firmicutes    | Clostridia   | 0                   | 0                    | 0                   | 0                    |
| <b>seq1182</b> | Firmicutes    | Clostridia   | 0                   | 0                    | 0                   | 0                    |
| <b>seq1192</b> | Firmicutes    | Clostridia   | 0                   | 0                    | 0                   | 0                    |
| <b>seq1281</b> | Firmicutes    | Clostridia   | 0                   | 0                    | 0                   | 0                    |
| <b>seq1390</b> | Firmicutes    | Clostridia   | 0                   | 0                    | 0                   | 0                    |
| <b>seq1428</b> | Firmicutes    | Clostridia   | 0                   | 0                    | 0                   | 0                    |
| <b>seq1450</b> | Firmicutes    | Clostridia   | 0                   | 0                    | 0                   | 0                    |
| <b>seq1471</b> | Firmicutes    | Clostridia   | 0                   | 0                    | 0                   | 0                    |
| <b>seq1488</b> | Firmicutes    | Clostridia   | 0                   | 0                    | 0                   | 0                    |
| <b>seq1511</b> | Firmicutes    | Clostridia   | 0                   | 0                    | 0                   | 0                    |
| <b>seq1518</b> | Firmicutes    | Clostridia   | 0                   | 0                    | 0                   | 0                    |

Sequence Count Table

|                | <b>Phylum</b> | <b>Class</b> | <b>Subject13WK0</b> | <b>Subject13WK12</b> | <b>Subject39WK0</b> | <b>Subject39WK12</b> |
|----------------|---------------|--------------|---------------------|----------------------|---------------------|----------------------|
| <b>seq1726</b> | Firmicutes    | Clostridia   | 0                   | 0                    | 0                   | 0                    |
| <b>seq1754</b> | Firmicutes    | Clostridia   | 0                   | 0                    | 0                   | 0                    |
| <b>seq1804</b> | Firmicutes    | Clostridia   | 0                   | 0                    | 0                   | 0                    |
| <b>seq189</b>  | Firmicutes    | Clostridia   | 0                   | 0                    | 0                   | 0                    |
| <b>seq294</b>  | Firmicutes    | Clostridia   | 0                   | 0                    | 0                   | 0                    |
| <b>seq307</b>  | Firmicutes    | Clostridia   | 523                 | 0                    | 0                   | 0                    |
| <b>seq324</b>  | Firmicutes    | Clostridia   | 0                   | 0                    | 0                   | 0                    |
| <b>seq331</b>  | Firmicutes    | Clostridia   | 129                 | 0                    | 0                   | 0                    |
| <b>seq346</b>  | Firmicutes    | Clostridia   | 0                   | 0                    | 0                   | 0                    |
| <b>seq376</b>  | Firmicutes    | Clostridia   | 0                   | 0                    | 0                   | 0                    |
| <b>seq450</b>  | Firmicutes    | Clostridia   | 0                   | 0                    | 0                   | 0                    |
| <b>seq466</b>  | Firmicutes    | Clostridia   | 0                   | 0                    | 0                   | 0                    |
| <b>seq597</b>  | Firmicutes    | Clostridia   | 0                   | 0                    | 0                   | 0                    |
| <b>seq612</b>  | Firmicutes    | Clostridia   | 0                   | 0                    | 0                   | 0                    |
| <b>seq618</b>  | Firmicutes    | Clostridia   | 0                   | 0                    | 0                   | 0                    |
| <b>seq628</b>  | Firmicutes    | Clostridia   | 0                   | 0                    | 0                   | 0                    |
| <b>seq636</b>  | Firmicutes    | Clostridia   | 0                   | 0                    | 0                   | 0                    |
| <b>seq730</b>  | Firmicutes    | Clostridia   | 0                   | 0                    | 0                   | 0                    |
| <b>seq769</b>  | Firmicutes    | Clostridia   | 0                   | 0                    | 0                   | 0                    |
| <b>seq871</b>  | Firmicutes    | Clostridia   | 14                  | 88                   | 0                   | 0                    |
| <b>seq1019</b> | Firmicutes    | Clostridia   | 0                   | 0                    | 0                   | 0                    |
| <b>seq1146</b> | Firmicutes    | Clostridia   | 0                   | 0                    | 0                   | 0                    |
| <b>seq1182</b> | Firmicutes    | Clostridia   | 0                   | 0                    | 0                   | 0                    |
| <b>seq1192</b> | Firmicutes    | Clostridia   | 0                   | 0                    | 0                   | 0                    |
| <b>seq1281</b> | Firmicutes    | Clostridia   | 0                   | 0                    | 0                   | 0                    |
| <b>seq1390</b> | Firmicutes    | Clostridia   | 0                   | 0                    | 0                   | 0                    |
| <b>seq1428</b> | Firmicutes    | Clostridia   | 0                   | 0                    | 0                   | 0                    |
| <b>seq1450</b> | Firmicutes    | Clostridia   | 0                   | 0                    | 0                   | 0                    |
| <b>seq1471</b> | Firmicutes    | Clostridia   | 0                   | 0                    | 0                   | 0                    |
| <b>seq1488</b> | Firmicutes    | Clostridia   | 0                   | 0                    | 0                   | 0                    |
| <b>seq1511</b> | Firmicutes    | Clostridia   | 0                   | 0                    | 0                   | 0                    |
| <b>seq1518</b> | Firmicutes    | Clostridia   | 0                   | 0                    | 0                   | 0                    |

Sequence Count Table

|                | <b>Phylum</b> | <b>Class</b> | <b>Subject26WK0</b> | <b>Subject26WK12</b> | <b>Subject14WK0</b> | <b>Subject14WK12</b> |
|----------------|---------------|--------------|---------------------|----------------------|---------------------|----------------------|
| <b>seq1726</b> | Firmicutes    | Clostridia   | 0                   | 0                    | 0                   | 0                    |
| <b>seq1754</b> | Firmicutes    | Clostridia   | 0                   | 0                    | 0                   | 0                    |
| <b>seq1804</b> | Firmicutes    | Clostridia   | 0                   | 0                    | 0                   | 0                    |
| <b>seq189</b>  | Firmicutes    | Clostridia   | 0                   | 0                    | 0                   | 0                    |
| <b>seq294</b>  | Firmicutes    | Clostridia   | 0                   | 0                    | 0                   | 0                    |
| <b>seq307</b>  | Firmicutes    | Clostridia   | 0                   | 0                    | 0                   | 0                    |
| <b>seq324</b>  | Firmicutes    | Clostridia   | 0                   | 0                    | 0                   | 0                    |
| <b>seq331</b>  | Firmicutes    | Clostridia   | 0                   | 0                    | 0                   | 0                    |
| <b>seq346</b>  | Firmicutes    | Clostridia   | 0                   | 0                    | 0                   | 0                    |
| <b>seq376</b>  | Firmicutes    | Clostridia   | 0                   | 0                    | 0                   | 0                    |
| <b>seq450</b>  | Firmicutes    | Clostridia   | 0                   | 0                    | 0                   | 0                    |
| <b>seq466</b>  | Firmicutes    | Clostridia   | 0                   | 0                    | 0                   | 469                  |
| <b>seq597</b>  | Firmicutes    | Clostridia   | 0                   | 0                    | 0                   | 0                    |
| <b>seq612</b>  | Firmicutes    | Clostridia   | 0                   | 0                    | 0                   | 0                    |
| <b>seq618</b>  | Firmicutes    | Clostridia   | 0                   | 0                    | 0                   | 0                    |
| <b>seq628</b>  | Firmicutes    | Clostridia   | 0                   | 0                    | 496                 | 0                    |
| <b>seq636</b>  | Firmicutes    | Clostridia   | 0                   | 0                    | 432                 | 54                   |
| <b>seq730</b>  | Firmicutes    | Clostridia   | 0                   | 0                    | 0                   | 0                    |
| <b>seq769</b>  | Firmicutes    | Clostridia   | 0                   | 0                    | 0                   | 0                    |
| <b>seq871</b>  | Firmicutes    | Clostridia   | 0                   | 0                    | 0                   | 0                    |
| <b>seq1019</b> | Firmicutes    | Clostridia   | 0                   | 0                    | 0                   | 0                    |
| <b>seq1146</b> | Firmicutes    | Clostridia   | 0                   | 0                    | 0                   | 0                    |
| <b>seq1182</b> | Firmicutes    | Clostridia   | 0                   | 0                    | 0                   | 0                    |
| <b>seq1192</b> | Firmicutes    | Clostridia   | 0                   | 0                    | 0                   | 0                    |
| <b>seq1281</b> | Firmicutes    | Clostridia   | 0                   | 0                    | 0                   | 0                    |
| <b>seq1390</b> | Firmicutes    | Clostridia   | 0                   | 0                    | 0                   | 0                    |
| <b>seq1428</b> | Firmicutes    | Clostridia   | 0                   | 0                    | 0                   | 0                    |
| <b>seq1450</b> | Firmicutes    | Clostridia   | 0                   | 0                    | 0                   | 0                    |
| <b>seq1471</b> | Firmicutes    | Clostridia   | 0                   | 0                    | 0                   | 0                    |
| <b>seq1488</b> | Firmicutes    | Clostridia   | 0                   | 0                    | 0                   | 0                    |
| <b>seq1511</b> | Firmicutes    | Clostridia   | 0                   | 0                    | 0                   | 0                    |
| <b>seq1518</b> | Firmicutes    | Clostridia   | 0                   | 0                    | 0                   | 0                    |

Sequence Count Table

|                | <b>Phylum</b> | <b>Class</b> | <b>Subject27WK0</b> | <b>Subject27WK12</b> | <b>Subject15WK0</b> | <b>Subject15WK12</b> |
|----------------|---------------|--------------|---------------------|----------------------|---------------------|----------------------|
| <b>seq1726</b> | Firmicutes    | Clostridia   | 0                   | 0                    | 0                   | 0                    |
| <b>seq1754</b> | Firmicutes    | Clostridia   | 0                   | 0                    | 0                   | 0                    |
| <b>seq1804</b> | Firmicutes    | Clostridia   | 0                   | 0                    | 0                   | 0                    |
| <b>seq189</b>  | Firmicutes    | Clostridia   | 0                   | 0                    | 0                   | 0                    |
| <b>seq294</b>  | Firmicutes    | Clostridia   | 0                   | 0                    | 0                   | 0                    |
| <b>seq307</b>  | Firmicutes    | Clostridia   | 0                   | 0                    | 0                   | 0                    |
| <b>seq324</b>  | Firmicutes    | Clostridia   | 0                   | 0                    | 0                   | 0                    |
| <b>seq331</b>  | Firmicutes    | Clostridia   | 0                   | 0                    | 0                   | 0                    |
| <b>seq346</b>  | Firmicutes    | Clostridia   | 0                   | 0                    | 0                   | 0                    |
| <b>seq376</b>  | Firmicutes    | Clostridia   | 0                   | 0                    | 0                   | 0                    |
| <b>seq450</b>  | Firmicutes    | Clostridia   | 0                   | 285                  | 0                   | 0                    |
| <b>seq466</b>  | Firmicutes    | Clostridia   | 0                   | 0                    | 0                   | 0                    |
| <b>seq597</b>  | Firmicutes    | Clostridia   | 0                   | 0                    | 0                   | 0                    |
| <b>seq612</b>  | Firmicutes    | Clostridia   | 0                   | 0                    | 0                   | 0                    |
| <b>seq618</b>  | Firmicutes    | Clostridia   | 0                   | 0                    | 0                   | 0                    |
| <b>seq628</b>  | Firmicutes    | Clostridia   | 0                   | 0                    | 0                   | 0                    |
| <b>seq636</b>  | Firmicutes    | Clostridia   | 0                   | 0                    | 0                   | 0                    |
| <b>seq730</b>  | Firmicutes    | Clostridia   | 0                   | 0                    | 0                   | 0                    |
| <b>seq769</b>  | Firmicutes    | Clostridia   | 0                   | 0                    | 0                   | 0                    |
| <b>seq871</b>  | Firmicutes    | Clostridia   | 0                   | 0                    | 82                  | 17                   |
| <b>seq1019</b> | Firmicutes    | Clostridia   | 0                   | 0                    | 0                   | 0                    |
| <b>seq1146</b> | Firmicutes    | Clostridia   | 0                   | 0                    | 0                   | 0                    |
| <b>seq1182</b> | Firmicutes    | Clostridia   | 0                   | 0                    | 0                   | 0                    |
| <b>seq1192</b> | Firmicutes    | Clostridia   | 0                   | 0                    | 0                   | 0                    |
| <b>seq1281</b> | Firmicutes    | Clostridia   | 0                   | 0                    | 0                   | 0                    |
| <b>seq1390</b> | Firmicutes    | Clostridia   | 0                   | 0                    | 0                   | 0                    |
| <b>seq1428</b> | Firmicutes    | Clostridia   | 0                   | 0                    | 0                   | 0                    |
| <b>seq1450</b> | Firmicutes    | Clostridia   | 0                   | 0                    | 0                   | 0                    |
| <b>seq1471</b> | Firmicutes    | Clostridia   | 0                   | 0                    | 0                   | 0                    |
| <b>seq1488</b> | Firmicutes    | Clostridia   | 0                   | 0                    | 0                   | 0                    |
| <b>seq1511</b> | Firmicutes    | Clostridia   | 0                   | 0                    | 0                   | 0                    |
| <b>seq1518</b> | Firmicutes    | Clostridia   | 0                   | 0                    | 0                   | 0                    |

Sequence Count Table

|                | <b>Phylum</b> | <b>Class</b> | <b>Δ</b> |  |  |  |
|----------------|---------------|--------------|----------|--|--|--|
| <b>seq1726</b> | Firmicutes    | Clostridia   |          |  |  |  |
| <b>seq1754</b> | Firmicutes    | Clostridia   |          |  |  |  |
| <b>seq1804</b> | Firmicutes    | Clostridia   |          |  |  |  |
| <b>seq189</b>  | Firmicutes    | Clostridia   |          |  |  |  |
| <b>seq294</b>  | Firmicutes    | Clostridia   |          |  |  |  |
| <b>seq307</b>  | Firmicutes    | Clostridia   |          |  |  |  |
| <b>seq324</b>  | Firmicutes    | Clostridia   |          |  |  |  |
| <b>seq331</b>  | Firmicutes    | Clostridia   |          |  |  |  |
| <b>seq346</b>  | Firmicutes    | Clostridia   |          |  |  |  |
| <b>seq376</b>  | Firmicutes    | Clostridia   |          |  |  |  |
| <b>seq450</b>  | Firmicutes    | Clostridia   |          |  |  |  |
| <b>seq466</b>  | Firmicutes    | Clostridia   |          |  |  |  |
| <b>seq597</b>  | Firmicutes    | Clostridia   |          |  |  |  |
| <b>seq612</b>  | Firmicutes    | Clostridia   |          |  |  |  |
| <b>seq618</b>  | Firmicutes    | Clostridia   |          |  |  |  |
| <b>seq628</b>  | Firmicutes    | Clostridia   |          |  |  |  |
| <b>seq636</b>  | Firmicutes    | Clostridia   |          |  |  |  |
| <b>seq730</b>  | Firmicutes    | Clostridia   |          |  |  |  |
| <b>seq769</b>  | Firmicutes    | Clostridia   |          |  |  |  |
| <b>seq871</b>  | Firmicutes    | Clostridia   |          |  |  |  |
| <b>seq1019</b> | Firmicutes    | Clostridia   |          |  |  |  |
| <b>seq1146</b> | Firmicutes    | Clostridia   |          |  |  |  |
| <b>seq1182</b> | Firmicutes    | Clostridia   |          |  |  |  |
| <b>seq1192</b> | Firmicutes    | Clostridia   |          |  |  |  |
| <b>seq1281</b> | Firmicutes    | Clostridia   |          |  |  |  |
| <b>seq1390</b> | Firmicutes    | Clostridia   |          |  |  |  |
| <b>seq1428</b> | Firmicutes    | Clostridia   |          |  |  |  |
| <b>seq1450</b> | Firmicutes    | Clostridia   |          |  |  |  |
| <b>seq1471</b> | Firmicutes    | Clostridia   |          |  |  |  |
| <b>seq1488</b> | Firmicutes    | Clostridia   |          |  |  |  |
| <b>seq1511</b> | Firmicutes    | Clostridia   |          |  |  |  |
| <b>seq1518</b> | Firmicutes    | Clostridia   |          |  |  |  |



Sequence Count Table

|                | <b>Phylum</b> | <b>Class</b> | <b>Order</b>  | <b>Family</b>   |
|----------------|---------------|--------------|---------------|-----------------|
| <b>seq1628</b> | Firmicutes    | Clostridia   | Clostridiales | Ruminococcaceae |
| <b>seq1752</b> | Firmicutes    | Clostridia   | Clostridiales | Ruminococcaceae |
| <b>seq36</b>   | Firmicutes    | Clostridia   | Clostridiales | Ruminococcaceae |
| <b>seq86</b>   | Firmicutes    | Clostridia   | Clostridiales | Ruminococcaceae |
| <b>seq197</b>  | Firmicutes    | Clostridia   | Clostridiales | Ruminococcaceae |
| <b>seq211</b>  | Firmicutes    | Clostridia   | Clostridiales | Ruminococcaceae |
| <b>seq217</b>  | Firmicutes    | Clostridia   | Clostridiales | Ruminococcaceae |
| <b>seq300</b>  | Firmicutes    | Clostridia   | Clostridiales | Ruminococcaceae |
| <b>seq383</b>  | Firmicutes    | Clostridia   | Clostridiales | Ruminococcaceae |
| <b>seq491</b>  | Firmicutes    | Clostridia   | Clostridiales | Ruminococcaceae |
| <b>seq544</b>  | Firmicutes    | Clostridia   | Clostridiales | Ruminococcaceae |
| <b>seq1124</b> | Firmicutes    | Clostridia   | Clostridiales | Ruminococcaceae |
| <b>seq1174</b> | Firmicutes    | Clostridia   | Clostridiales | Ruminococcaceae |
| <b>seq1499</b> | Firmicutes    | Clostridia   | Clostridiales | Ruminococcaceae |
| <b>seq6</b>    | Firmicutes    | Clostridia   | Clostridiales | Ruminococcaceae |
| <b>seq28</b>   | Firmicutes    | Clostridia   | Clostridiales | Ruminococcaceae |
| <b>seq194</b>  | Firmicutes    | Clostridia   | Clostridiales | Ruminococcaceae |
| <b>seq210</b>  | Firmicutes    | Clostridia   | Clostridiales | Ruminococcaceae |
| <b>seq799</b>  | Firmicutes    | Clostridia   | Clostridiales | Ruminococcaceae |
| <b>seq1837</b> | Firmicutes    | Clostridia   | Clostridiales | Ruminococcaceae |
| <b>seq12</b>   | Firmicutes    | Clostridia   | Clostridiales | Ruminococcaceae |
| <b>seq23</b>   | Firmicutes    | Clostridia   | Clostridiales | Ruminococcaceae |
| <b>seq241</b>  | Firmicutes    | Clostridia   | Clostridiales | Ruminococcaceae |
| <b>seq306</b>  | Firmicutes    | Clostridia   | Clostridiales | Ruminococcaceae |
| <b>seq339</b>  | Firmicutes    | Clostridia   | Clostridiales | Ruminococcaceae |
| <b>seq381</b>  | Firmicutes    | Clostridia   | Clostridiales | Ruminococcaceae |
| <b>seq399</b>  | Firmicutes    | Clostridia   | Clostridiales | Ruminococcaceae |
| <b>seq756</b>  | Firmicutes    | Clostridia   | Clostridiales | Ruminococcaceae |
| <b>seq820</b>  | Firmicutes    | Clostridia   | Clostridiales | Ruminococcaceae |
| <b>seq874</b>  | Firmicutes    | Clostridia   | Clostridiales | Ruminococcaceae |
| <b>seq901</b>  | Firmicutes    | Clostridia   | Clostridiales | Ruminococcaceae |
| <b>seq905</b>  | Firmicutes    | Clostridia   | Clostridiales | Ruminococcaceae |

Sequence Count Table

|                | <b>Phylum</b> | <b>Class</b> | <b>Genus</b>            | <b>Species</b>  |
|----------------|---------------|--------------|-------------------------|-----------------|
| <b>seq1628</b> | Firmicutes    | Clostridia   | Ruminococcaceae_UCG-014 |                 |
| <b>seq1752</b> | Firmicutes    | Clostridia   | Ruminococcaceae_UCG-014 |                 |
| <b>seq36</b>   | Firmicutes    | Clostridia   | Ruminococcus_1          | bicirculans     |
| <b>seq86</b>   | Firmicutes    | Clostridia   | Ruminococcus_1          | callidus        |
| <b>seq197</b>  | Firmicutes    | Clostridia   | Ruminococcus_1          |                 |
| <b>seq211</b>  | Firmicutes    | Clostridia   | Ruminococcus_1          |                 |
| <b>seq217</b>  | Firmicutes    | Clostridia   | Ruminococcus_1          |                 |
| <b>seq300</b>  | Firmicutes    | Clostridia   | Ruminococcus_1          | champanellensis |
| <b>seq383</b>  | Firmicutes    | Clostridia   | Ruminococcus_1          |                 |
| <b>seq491</b>  | Firmicutes    | Clostridia   | Ruminococcus_1          |                 |
| <b>seq544</b>  | Firmicutes    | Clostridia   | Ruminococcus_1          |                 |
| <b>seq1124</b> | Firmicutes    | Clostridia   | Ruminococcus_1          |                 |
| <b>seq1174</b> | Firmicutes    | Clostridia   | Ruminococcus_1          |                 |
| <b>seq1499</b> | Firmicutes    | Clostridia   | Ruminococcus_1          |                 |
| <b>seq6</b>    | Firmicutes    | Clostridia   | Ruminococcus_2          | bromii          |
| <b>seq28</b>   | Firmicutes    | Clostridia   | Ruminococcus_2          |                 |
| <b>seq194</b>  | Firmicutes    | Clostridia   | Ruminococcus_2          |                 |
| <b>seq210</b>  | Firmicutes    | Clostridia   | Ruminococcus_2          |                 |
| <b>seq799</b>  | Firmicutes    | Clostridia   | Ruminococcus_2          |                 |
| <b>seq1837</b> | Firmicutes    | Clostridia   | Ruminococcus_2          |                 |
| <b>seq12</b>   | Firmicutes    | Clostridia   | Subdoligranulum         |                 |
| <b>seq23</b>   | Firmicutes    | Clostridia   | Subdoligranulum         |                 |
| <b>seq241</b>  | Firmicutes    | Clostridia   | Subdoligranulum         |                 |
| <b>seq306</b>  | Firmicutes    | Clostridia   | Subdoligranulum         |                 |
| <b>seq339</b>  | Firmicutes    | Clostridia   | Subdoligranulum         |                 |
| <b>seq381</b>  | Firmicutes    | Clostridia   | Subdoligranulum         |                 |
| <b>seq399</b>  | Firmicutes    | Clostridia   | Subdoligranulum         |                 |
| <b>seq756</b>  | Firmicutes    | Clostridia   | Subdoligranulum         |                 |
| <b>seq820</b>  | Firmicutes    | Clostridia   | Subdoligranulum         |                 |
| <b>seq874</b>  | Firmicutes    | Clostridia   | Subdoligranulum         |                 |
| <b>seq901</b>  | Firmicutes    | Clostridia   | Subdoligranulum         |                 |
| <b>seq905</b>  | Firmicutes    | Clostridia   | Subdoligranulum         |                 |

Sequence Count Table

|                | <b>Phylum</b> | <b>Class</b> | <b>Subject34WK0</b> | <b>Subject34WK12</b> | <b>Subject16WK0</b> | <b>Subject16WK12</b> |
|----------------|---------------|--------------|---------------------|----------------------|---------------------|----------------------|
| <b>seq1628</b> | Firmicutes    | Clostridia   | 0                   | 0                    | 0                   | 0                    |
| <b>seq1752</b> | Firmicutes    | Clostridia   | 0                   | 0                    | 0                   | 0                    |
| <b>seq36</b>   | Firmicutes    | Clostridia   | 18                  | 487                  | 0                   | 0                    |
| <b>seq86</b>   | Firmicutes    | Clostridia   | 73                  | 0                    | 396                 | 1026                 |
| <b>seq197</b>  | Firmicutes    | Clostridia   | 0                   | 0                    | 0                   | 0                    |
| <b>seq211</b>  | Firmicutes    | Clostridia   | 56                  | 50                   | 199                 | 16                   |
| <b>seq217</b>  | Firmicutes    | Clostridia   | 0                   | 830                  | 0                   | 0                    |
| <b>seq300</b>  | Firmicutes    | Clostridia   | 0                   | 0                    | 0                   | 0                    |
| <b>seq383</b>  | Firmicutes    | Clostridia   | 0                   | 0                    | 0                   | 0                    |
| <b>seq491</b>  | Firmicutes    | Clostridia   | 0                   | 0                    | 0                   | 0                    |
| <b>seq544</b>  | Firmicutes    | Clostridia   | 0                   | 0                    | 0                   | 0                    |
| <b>seq1124</b> | Firmicutes    | Clostridia   | 0                   | 0                    | 0                   | 0                    |
| <b>seq1174</b> | Firmicutes    | Clostridia   | 0                   | 0                    | 0                   | 0                    |
| <b>seq1499</b> | Firmicutes    | Clostridia   | 0                   | 0                    | 0                   | 0                    |
| <b>seq6</b>    | Firmicutes    | Clostridia   | 197                 | 3004                 | 0                   | 0                    |
| <b>seq28</b>   | Firmicutes    | Clostridia   | 0                   | 0                    | 0                   | 0                    |
| <b>seq194</b>  | Firmicutes    | Clostridia   | 0                   | 0                    | 0                   | 0                    |
| <b>seq210</b>  | Firmicutes    | Clostridia   | 0                   | 0                    | 0                   | 0                    |
| <b>seq799</b>  | Firmicutes    | Clostridia   | 0                   | 0                    | 0                   | 0                    |
| <b>seq1837</b> | Firmicutes    | Clostridia   | 0                   | 0                    | 0                   | 0                    |
| <b>seq12</b>   | Firmicutes    | Clostridia   | 507                 | 1742                 | 1202                | 2187                 |
| <b>seq23</b>   | Firmicutes    | Clostridia   | 36                  | 52                   | 689                 | 803                  |
| <b>seq241</b>  | Firmicutes    | Clostridia   | 0                   | 0                    | 0                   | 0                    |
| <b>seq306</b>  | Firmicutes    | Clostridia   | 0                   | 0                    | 0                   | 0                    |
| <b>seq339</b>  | Firmicutes    | Clostridia   | 0                   | 0                    | 0                   | 0                    |
| <b>seq381</b>  | Firmicutes    | Clostridia   | 0                   | 0                    | 176                 | 146                  |
| <b>seq399</b>  | Firmicutes    | Clostridia   | 0                   | 0                    | 0                   | 0                    |
| <b>seq756</b>  | Firmicutes    | Clostridia   | 0                   | 0                    | 0                   | 0                    |
| <b>seq820</b>  | Firmicutes    | Clostridia   | 0                   | 0                    | 0                   | 0                    |
| <b>seq874</b>  | Firmicutes    | Clostridia   | 0                   | 0                    | 62                  | 149                  |
| <b>seq901</b>  | Firmicutes    | Clostridia   | 0                   | 0                    | 0                   | 0                    |
| <b>seq905</b>  | Firmicutes    | Clostridia   | 0                   | 0                    | 0                   | 0                    |

Sequence Count Table

|                | <b>Phylum</b> | <b>Class</b> | <b>Subject17WK0</b> | <b>Subject17WK12</b> | <b>Subject1WK0</b> | <b>Subject1WK12</b> |
|----------------|---------------|--------------|---------------------|----------------------|--------------------|---------------------|
| <b>seq1628</b> | Firmicutes    | Clostridia   | 0                   | 0                    | 0                  | 0                   |
| <b>seq1752</b> | Firmicutes    | Clostridia   | 0                   | 0                    | 0                  | 0                   |
| <b>seq36</b>   | Firmicutes    | Clostridia   | 0                   | 0                    | 3755               | 3812                |
| <b>seq86</b>   | Firmicutes    | Clostridia   | 0                   | 0                    | 1907               | 1579                |
| <b>seq197</b>  | Firmicutes    | Clostridia   | 910                 | 578                  | 0                  | 0                   |
| <b>seq211</b>  | Firmicutes    | Clostridia   | 0                   | 0                    | 0                  | 0                   |
| <b>seq217</b>  | Firmicutes    | Clostridia   | 0                   | 0                    | 0                  | 0                   |
| <b>seq300</b>  | Firmicutes    | Clostridia   | 0                   | 0                    | 0                  | 0                   |
| <b>seq383</b>  | Firmicutes    | Clostridia   | 0                   | 0                    | 0                  | 0                   |
| <b>seq491</b>  | Firmicutes    | Clostridia   | 0                   | 0                    | 0                  | 0                   |
| <b>seq544</b>  | Firmicutes    | Clostridia   | 0                   | 0                    | 0                  | 0                   |
| <b>seq1124</b> | Firmicutes    | Clostridia   | 0                   | 0                    | 0                  | 0                   |
| <b>seq1174</b> | Firmicutes    | Clostridia   | 0                   | 0                    | 0                  | 0                   |
| <b>seq1499</b> | Firmicutes    | Clostridia   | 0                   | 0                    | 0                  | 0                   |
| <b>seq6</b>    | Firmicutes    | Clostridia   | 23462               | 10018                | 0                  | 0                   |
| <b>seq28</b>   | Firmicutes    | Clostridia   | 0                   | 0                    | 13586              | 15936               |
| <b>seq194</b>  | Firmicutes    | Clostridia   | 0                   | 0                    | 0                  | 0                   |
| <b>seq210</b>  | Firmicutes    | Clostridia   | 0                   | 0                    | 0                  | 0                   |
| <b>seq799</b>  | Firmicutes    | Clostridia   | 0                   | 0                    | 0                  | 0                   |
| <b>seq1837</b> | Firmicutes    | Clostridia   | 0                   | 0                    | 0                  | 0                   |
| <b>seq12</b>   | Firmicutes    | Clostridia   | 2974                | 7931                 | 8805               | 9338                |
| <b>seq23</b>   | Firmicutes    | Clostridia   | 147                 | 565                  | 267                | 261                 |
| <b>seq241</b>  | Firmicutes    | Clostridia   | 59                  | 184                  | 49                 | 38                  |
| <b>seq306</b>  | Firmicutes    | Clostridia   | 0                   | 0                    | 0                  | 0                   |
| <b>seq339</b>  | Firmicutes    | Clostridia   | 0                   | 0                    | 0                  | 0                   |
| <b>seq381</b>  | Firmicutes    | Clostridia   | 0                   | 0                    | 0                  | 0                   |
| <b>seq399</b>  | Firmicutes    | Clostridia   | 0                   | 91                   | 0                  | 0                   |
| <b>seq756</b>  | Firmicutes    | Clostridia   | 0                   | 0                    | 0                  | 0                   |
| <b>seq820</b>  | Firmicutes    | Clostridia   | 0                   | 103                  | 0                  | 0                   |
| <b>seq874</b>  | Firmicutes    | Clostridia   | 0                   | 0                    | 0                  | 0                   |
| <b>seq901</b>  | Firmicutes    | Clostridia   | 0                   | 0                    | 0                  | 0                   |
| <b>seq905</b>  | Firmicutes    | Clostridia   | 0                   | 0                    | 0                  | 0                   |

Sequence Count Table

|                | <b>Phylum</b> | <b>Class</b> | <b>Subject2WK0</b> | <b>Subject2WK12</b> | <b>Subject3WK0</b> | <b>Subject3WK12</b> |
|----------------|---------------|--------------|--------------------|---------------------|--------------------|---------------------|
| <b>seq1628</b> | Firmicutes    | Clostridia   | 0                  | 0                   | 0                  | 0                   |
| <b>seq1752</b> | Firmicutes    | Clostridia   | 0                  | 0                   | 0                  | 0                   |
| <b>seq36</b>   | Firmicutes    | Clostridia   | 2882               | 1716                | 0                  | 499                 |
| <b>seq86</b>   | Firmicutes    | Clostridia   | 0                  | 0                   | 0                  | 56                  |
| <b>seq197</b>  | Firmicutes    | Clostridia   | 0                  | 0                   | 0                  | 0                   |
| <b>seq211</b>  | Firmicutes    | Clostridia   | 0                  | 0                   | 0                  | 0                   |
| <b>seq217</b>  | Firmicutes    | Clostridia   | 0                  | 0                   | 0                  | 0                   |
| <b>seq300</b>  | Firmicutes    | Clostridia   | 0                  | 0                   | 0                  | 0                   |
| <b>seq383</b>  | Firmicutes    | Clostridia   | 0                  | 0                   | 0                  | 0                   |
| <b>seq491</b>  | Firmicutes    | Clostridia   | 0                  | 0                   | 0                  | 0                   |
| <b>seq544</b>  | Firmicutes    | Clostridia   | 0                  | 0                   | 0                  | 0                   |
| <b>seq1124</b> | Firmicutes    | Clostridia   | 0                  | 0                   | 0                  | 0                   |
| <b>seq1174</b> | Firmicutes    | Clostridia   | 0                  | 0                   | 0                  | 0                   |
| <b>seq1499</b> | Firmicutes    | Clostridia   | 0                  | 0                   | 0                  | 0                   |
| <b>seq6</b>    | Firmicutes    | Clostridia   | 0                  | 0                   | 0                  | 0                   |
| <b>seq28</b>   | Firmicutes    | Clostridia   | 0                  | 0                   | 0                  | 0                   |
| <b>seq194</b>  | Firmicutes    | Clostridia   | 0                  | 0                   | 0                  | 0                   |
| <b>seq210</b>  | Firmicutes    | Clostridia   | 0                  | 0                   | 0                  | 0                   |
| <b>seq799</b>  | Firmicutes    | Clostridia   | 0                  | 0                   | 0                  | 0                   |
| <b>seq1837</b> | Firmicutes    | Clostridia   | 0                  | 0                   | 0                  | 0                   |
| <b>seq12</b>   | Firmicutes    | Clostridia   | 559                | 883                 | 0                  | 0                   |
| <b>seq23</b>   | Firmicutes    | Clostridia   | 400                | 122                 | 0                  | 0                   |
| <b>seq241</b>  | Firmicutes    | Clostridia   | 0                  | 0                   | 0                  | 0                   |
| <b>seq306</b>  | Firmicutes    | Clostridia   | 951                | 1191                | 0                  | 0                   |
| <b>seq339</b>  | Firmicutes    | Clostridia   | 0                  | 0                   | 0                  | 0                   |
| <b>seq381</b>  | Firmicutes    | Clostridia   | 0                  | 0                   | 0                  | 0                   |
| <b>seq399</b>  | Firmicutes    | Clostridia   | 0                  | 0                   | 0                  | 0                   |
| <b>seq756</b>  | Firmicutes    | Clostridia   | 0                  | 0                   | 0                  | 0                   |
| <b>seq820</b>  | Firmicutes    | Clostridia   | 0                  | 0                   | 0                  | 0                   |
| <b>seq874</b>  | Firmicutes    | Clostridia   | 0                  | 0                   | 0                  | 0                   |
| <b>seq901</b>  | Firmicutes    | Clostridia   | 0                  | 0                   | 0                  | 0                   |
| <b>seq905</b>  | Firmicutes    | Clostridia   | 0                  | 0                   | 0                  | 0                   |

Sequence Count Table

|                | <b>Phylum</b> | <b>Class</b> | <b>Subject4WK0</b> | <b>Subject4WK12</b> | <b>Subject5WK0</b> | <b>Subject5WK12</b> |
|----------------|---------------|--------------|--------------------|---------------------|--------------------|---------------------|
| <b>seq1628</b> | Firmicutes    | Clostridia   | 17                 | 0                   | 0                  | 0                   |
| <b>seq1752</b> | Firmicutes    | Clostridia   | 0                  | 0                   | 0                  | 0                   |
| <b>seq36</b>   | Firmicutes    | Clostridia   | 0                  | 0                   | 1394               | 3981                |
| <b>seq86</b>   | Firmicutes    | Clostridia   | 0                  | 0                   | 262                | 431                 |
| <b>seq197</b>  | Firmicutes    | Clostridia   | 2371               | 0                   | 0                  | 0                   |
| <b>seq211</b>  | Firmicutes    | Clostridia   | 0                  | 0                   | 0                  | 0                   |
| <b>seq217</b>  | Firmicutes    | Clostridia   | 0                  | 0                   | 0                  | 0                   |
| <b>seq300</b>  | Firmicutes    | Clostridia   | 0                  | 0                   | 0                  | 0                   |
| <b>seq383</b>  | Firmicutes    | Clostridia   | 0                  | 0                   | 0                  | 0                   |
| <b>seq491</b>  | Firmicutes    | Clostridia   | 0                  | 0                   | 0                  | 0                   |
| <b>seq544</b>  | Firmicutes    | Clostridia   | 0                  | 0                   | 0                  | 0                   |
| <b>seq1124</b> | Firmicutes    | Clostridia   | 0                  | 0                   | 0                  | 0                   |
| <b>seq1174</b> | Firmicutes    | Clostridia   | 0                  | 0                   | 0                  | 0                   |
| <b>seq1499</b> | Firmicutes    | Clostridia   | 0                  | 0                   | 0                  | 0                   |
| <b>seq6</b>    | Firmicutes    | Clostridia   | 10150              | 9                   | 0                  | 0                   |
| <b>seq28</b>   | Firmicutes    | Clostridia   | 0                  | 0                   | 0                  | 0                   |
| <b>seq194</b>  | Firmicutes    | Clostridia   | 0                  | 0                   | 882                | 3865                |
| <b>seq210</b>  | Firmicutes    | Clostridia   | 0                  | 0                   | 0                  | 0                   |
| <b>seq799</b>  | Firmicutes    | Clostridia   | 0                  | 0                   | 0                  | 0                   |
| <b>seq1837</b> | Firmicutes    | Clostridia   | 0                  | 0                   | 0                  | 0                   |
| <b>seq12</b>   | Firmicutes    | Clostridia   | 1636               | 3002                | 694                | 834                 |
| <b>seq23</b>   | Firmicutes    | Clostridia   | 10983              | 1899                | 0                  | 0                   |
| <b>seq241</b>  | Firmicutes    | Clostridia   | 0                  | 0                   | 0                  | 0                   |
| <b>seq306</b>  | Firmicutes    | Clostridia   | 0                  | 0                   | 0                  | 0                   |
| <b>seq339</b>  | Firmicutes    | Clostridia   | 0                  | 0                   | 0                  | 0                   |
| <b>seq381</b>  | Firmicutes    | Clostridia   | 0                  | 0                   | 0                  | 0                   |
| <b>seq399</b>  | Firmicutes    | Clostridia   | 78                 | 60                  | 0                  | 0                   |
| <b>seq756</b>  | Firmicutes    | Clostridia   | 0                  | 0                   | 0                  | 0                   |
| <b>seq820</b>  | Firmicutes    | Clostridia   | 0                  | 0                   | 0                  | 0                   |
| <b>seq874</b>  | Firmicutes    | Clostridia   | 0                  | 0                   | 0                  | 0                   |
| <b>seq901</b>  | Firmicutes    | Clostridia   | 0                  | 0                   | 0                  | 0                   |
| <b>seq905</b>  | Firmicutes    | Clostridia   | 0                  | 0                   | 0                  | 0                   |

Sequence Count Table

|                | <b>Phylum</b> | <b>Class</b> | <b>Subject6WK0</b> | <b>Subject6WK12</b> | <b>Subject18WK0</b> | <b>Subject18WK12</b> |
|----------------|---------------|--------------|--------------------|---------------------|---------------------|----------------------|
| <b>seq1628</b> | Firmicutes    | Clostridia   | 0                  | 0                   | 0                   | 0                    |
| <b>seq1752</b> | Firmicutes    | Clostridia   | 0                  | 0                   | 0                   | 0                    |
| <b>seq36</b>   | Firmicutes    | Clostridia   | 785                | 811                 | 0                   | 0                    |
| <b>seq86</b>   | Firmicutes    | Clostridia   | 723                | 1397                | 0                   | 0                    |
| <b>seq197</b>  | Firmicutes    | Clostridia   | 0                  | 0                   | 0                   | 0                    |
| <b>seq211</b>  | Firmicutes    | Clostridia   | 0                  | 0                   | 0                   | 0                    |
| <b>seq217</b>  | Firmicutes    | Clostridia   | 0                  | 0                   | 0                   | 0                    |
| <b>seq300</b>  | Firmicutes    | Clostridia   | 318                | 0                   | 0                   | 0                    |
| <b>seq383</b>  | Firmicutes    | Clostridia   | 0                  | 0                   | 0                   | 0                    |
| <b>seq491</b>  | Firmicutes    | Clostridia   | 0                  | 0                   | 0                   | 0                    |
| <b>seq544</b>  | Firmicutes    | Clostridia   | 0                  | 0                   | 0                   | 0                    |
| <b>seq1124</b> | Firmicutes    | Clostridia   | 0                  | 0                   | 0                   | 0                    |
| <b>seq1174</b> | Firmicutes    | Clostridia   | 0                  | 0                   | 0                   | 0                    |
| <b>seq1499</b> | Firmicutes    | Clostridia   | 0                  | 0                   | 0                   | 0                    |
| <b>seq6</b>    | Firmicutes    | Clostridia   | 990                | 0                   | 0                   | 0                    |
| <b>seq28</b>   | Firmicutes    | Clostridia   | 2690               | 7688                | 0                   | 0                    |
| <b>seq194</b>  | Firmicutes    | Clostridia   | 0                  | 0                   | 0                   | 0                    |
| <b>seq210</b>  | Firmicutes    | Clostridia   | 0                  | 0                   | 0                   | 0                    |
| <b>seq799</b>  | Firmicutes    | Clostridia   | 0                  | 0                   | 0                   | 0                    |
| <b>seq1837</b> | Firmicutes    | Clostridia   | 0                  | 0                   | 0                   | 0                    |
| <b>seq12</b>   | Firmicutes    | Clostridia   | 1636               | 3593                | 626                 | 374                  |
| <b>seq23</b>   | Firmicutes    | Clostridia   | 3390               | 1892                | 3442                | 2209                 |
| <b>seq241</b>  | Firmicutes    | Clostridia   | 400                | 294                 | 0                   | 0                    |
| <b>seq306</b>  | Firmicutes    | Clostridia   | 0                  | 0                   | 0                   | 0                    |
| <b>seq339</b>  | Firmicutes    | Clostridia   | 0                  | 0                   | 0                   | 0                    |
| <b>seq381</b>  | Firmicutes    | Clostridia   | 0                  | 0                   | 0                   | 0                    |
| <b>seq399</b>  | Firmicutes    | Clostridia   | 0                  | 0                   | 0                   | 0                    |
| <b>seq756</b>  | Firmicutes    | Clostridia   | 127                | 183                 | 0                   | 0                    |
| <b>seq820</b>  | Firmicutes    | Clostridia   | 0                  | 0                   | 0                   | 0                    |
| <b>seq874</b>  | Firmicutes    | Clostridia   | 0                  | 0                   | 0                   | 0                    |
| <b>seq901</b>  | Firmicutes    | Clostridia   | 0                  | 0                   | 0                   | 0                    |
| <b>seq905</b>  | Firmicutes    | Clostridia   | 0                  | 0                   | 0                   | 0                    |

Sequence Count Table

|                | <b>Phylum</b> | <b>Class</b> | <b>Subject19WK0</b> | <b>Subject19WK12</b> | <b>Subject20WK0</b> | <b>Subject20WK12</b> |
|----------------|---------------|--------------|---------------------|----------------------|---------------------|----------------------|
| <b>seq1628</b> | Firmicutes    | Clostridia   | 0                   | 0                    | 0                   | 0                    |
| <b>seq1752</b> | Firmicutes    | Clostridia   | 0                   | 0                    | 0                   | 0                    |
| <b>seq36</b>   | Firmicutes    | Clostridia   | 0                   | 0                    | 40                  | 45                   |
| <b>seq86</b>   | Firmicutes    | Clostridia   | 0                   | 0                    | 0                   | 554                  |
| <b>seq197</b>  | Firmicutes    | Clostridia   | 0                   | 0                    | 0                   | 0                    |
| <b>seq211</b>  | Firmicutes    | Clostridia   | 0                   | 0                    | 6                   | 0                    |
| <b>seq217</b>  | Firmicutes    | Clostridia   | 0                   | 0                    | 106                 | 0                    |
| <b>seq300</b>  | Firmicutes    | Clostridia   | 0                   | 0                    | 1846                | 23                   |
| <b>seq383</b>  | Firmicutes    | Clostridia   | 0                   | 0                    | 0                   | 0                    |
| <b>seq491</b>  | Firmicutes    | Clostridia   | 0                   | 0                    | 0                   | 36                   |
| <b>seq544</b>  | Firmicutes    | Clostridia   | 0                   | 0                    | 0                   | 0                    |
| <b>seq1124</b> | Firmicutes    | Clostridia   | 0                   | 0                    | 0                   | 0                    |
| <b>seq1174</b> | Firmicutes    | Clostridia   | 0                   | 0                    | 37                  | 50                   |
| <b>seq1499</b> | Firmicutes    | Clostridia   | 0                   | 0                    | 15                  | 13                   |
| <b>seq6</b>    | Firmicutes    | Clostridia   | 0                   | 0                    | 132                 | 190                  |
| <b>seq28</b>   | Firmicutes    | Clostridia   | 0                   | 0                    | 887                 | 8286                 |
| <b>seq194</b>  | Firmicutes    | Clostridia   | 0                   | 0                    | 0                   | 0                    |
| <b>seq210</b>  | Firmicutes    | Clostridia   | 0                   | 0                    | 0                   | 0                    |
| <b>seq799</b>  | Firmicutes    | Clostridia   | 0                   | 0                    | 0                   | 0                    |
| <b>seq1837</b> | Firmicutes    | Clostridia   | 0                   | 0                    | 0                   | 0                    |
| <b>seq12</b>   | Firmicutes    | Clostridia   | 222                 | 1082                 | 1084                | 1831                 |
| <b>seq23</b>   | Firmicutes    | Clostridia   | 415                 | 97                   | 1005                | 640                  |
| <b>seq241</b>  | Firmicutes    | Clostridia   | 0                   | 0                    | 0                   | 0                    |
| <b>seq306</b>  | Firmicutes    | Clostridia   | 0                   | 0                    | 0                   | 0                    |
| <b>seq339</b>  | Firmicutes    | Clostridia   | 0                   | 0                    | 0                   | 0                    |
| <b>seq381</b>  | Firmicutes    | Clostridia   | 0                   | 0                    | 59                  | 160                  |
| <b>seq399</b>  | Firmicutes    | Clostridia   | 0                   | 0                    | 60                  | 100                  |
| <b>seq756</b>  | Firmicutes    | Clostridia   | 0                   | 0                    | 0                   | 0                    |
| <b>seq820</b>  | Firmicutes    | Clostridia   | 0                   | 0                    | 0                   | 0                    |
| <b>seq874</b>  | Firmicutes    | Clostridia   | 0                   | 0                    | 0                   | 0                    |
| <b>seq901</b>  | Firmicutes    | Clostridia   | 0                   | 0                    | 0                   | 0                    |
| <b>seq905</b>  | Firmicutes    | Clostridia   | 0                   | 0                    | 0                   | 0                    |



Sequence Count Table

|                | <b>Phylum</b> | <b>Class</b> | <b>Subject7WK0</b> | <b>Subject7WK12</b> | <b>Subject21WK0</b> | <b>Subject21WK12</b> |
|----------------|---------------|--------------|--------------------|---------------------|---------------------|----------------------|
| <b>seq1628</b> | Firmicutes    | Clostridia   | 0                  | 0                   | 0                   | 0                    |
| <b>seq1752</b> | Firmicutes    | Clostridia   | 0                  | 0                   | 0                   | 0                    |
| <b>seq36</b>   | Firmicutes    | Clostridia   | 0                  | 0                   | 0                   | 0                    |
| <b>seq86</b>   | Firmicutes    | Clostridia   | 0                  | 0                   | 0                   | 0                    |
| <b>seq197</b>  | Firmicutes    | Clostridia   | 0                  | 0                   | 0                   | 0                    |
| <b>seq211</b>  | Firmicutes    | Clostridia   | 0                  | 0                   | 0                   | 0                    |
| <b>seq217</b>  | Firmicutes    | Clostridia   | 0                  | 0                   | 0                   | 0                    |
| <b>seq300</b>  | Firmicutes    | Clostridia   | 0                  | 0                   | 0                   | 0                    |
| <b>seq383</b>  | Firmicutes    | Clostridia   | 0                  | 0                   | 0                   | 0                    |
| <b>seq491</b>  | Firmicutes    | Clostridia   | 0                  | 0                   | 0                   | 0                    |
| <b>seq544</b>  | Firmicutes    | Clostridia   | 0                  | 0                   | 0                   | 0                    |
| <b>seq1124</b> | Firmicutes    | Clostridia   | 0                  | 0                   | 0                   | 0                    |
| <b>seq1174</b> | Firmicutes    | Clostridia   | 0                  | 0                   | 0                   | 0                    |
| <b>seq1499</b> | Firmicutes    | Clostridia   | 0                  | 0                   | 0                   | 0                    |
| <b>seq6</b>    | Firmicutes    | Clostridia   | 0                  | 0                   | 427                 | 70                   |
| <b>seq28</b>   | Firmicutes    | Clostridia   | 0                  | 0                   | 0                   | 0                    |
| <b>seq194</b>  | Firmicutes    | Clostridia   | 0                  | 0                   | 0                   | 0                    |
| <b>seq210</b>  | Firmicutes    | Clostridia   | 0                  | 0                   | 0                   | 0                    |
| <b>seq799</b>  | Firmicutes    | Clostridia   | 0                  | 0                   | 215                 | 56                   |
| <b>seq1837</b> | Firmicutes    | Clostridia   | 0                  | 0                   | 0                   | 0                    |
| <b>seq12</b>   | Firmicutes    | Clostridia   | 3073               | 1099                | 0                   | 0                    |
| <b>seq23</b>   | Firmicutes    | Clostridia   | 380                | 322                 | 0                   | 0                    |
| <b>seq241</b>  | Firmicutes    | Clostridia   | 0                  | 0                   | 0                   | 0                    |
| <b>seq306</b>  | Firmicutes    | Clostridia   | 0                  | 0                   | 0                   | 0                    |
| <b>seq339</b>  | Firmicutes    | Clostridia   | 0                  | 0                   | 0                   | 0                    |
| <b>seq381</b>  | Firmicutes    | Clostridia   | 0                  | 0                   | 0                   | 0                    |
| <b>seq399</b>  | Firmicutes    | Clostridia   | 0                  | 0                   | 0                   | 0                    |
| <b>seq756</b>  | Firmicutes    | Clostridia   | 0                  | 0                   | 0                   | 0                    |
| <b>seq820</b>  | Firmicutes    | Clostridia   | 0                  | 0                   | 0                   | 0                    |
| <b>seq874</b>  | Firmicutes    | Clostridia   | 0                  | 0                   | 0                   | 0                    |
| <b>seq901</b>  | Firmicutes    | Clostridia   | 195                | 0                   | 0                   | 0                    |
| <b>seq905</b>  | Firmicutes    | Clostridia   | 0                  | 0                   | 0                   | 0                    |

Sequence Count Table

|                | <b>Phylum</b> | <b>Class</b> | <b>Subject8WK0</b> | <b>Subject8WK12</b> | <b>Subject9WK0</b> | <b>Subject9WK12</b> |
|----------------|---------------|--------------|--------------------|---------------------|--------------------|---------------------|
| <b>seq1628</b> | Firmicutes    | Clostridia   | 0                  | 0                   | 0                  | 0                   |
| <b>seq1752</b> | Firmicutes    | Clostridia   | 0                  | 0                   | 0                  | 0                   |
| <b>seq36</b>   | Firmicutes    | Clostridia   | 2308               | 2739                | 0                  | 0                   |
| <b>seq86</b>   | Firmicutes    | Clostridia   | 0                  | 0                   | 609                | 0                   |
| <b>seq197</b>  | Firmicutes    | Clostridia   | 0                  | 0                   | 0                  | 0                   |
| <b>seq211</b>  | Firmicutes    | Clostridia   | 0                  | 0                   | 0                  | 0                   |
| <b>seq217</b>  | Firmicutes    | Clostridia   | 0                  | 0                   | 0                  | 0                   |
| <b>seq300</b>  | Firmicutes    | Clostridia   | 0                  | 0                   | 0                  | 0                   |
| <b>seq383</b>  | Firmicutes    | Clostridia   | 0                  | 0                   | 0                  | 0                   |
| <b>seq491</b>  | Firmicutes    | Clostridia   | 0                  | 0                   | 0                  | 0                   |
| <b>seq544</b>  | Firmicutes    | Clostridia   | 0                  | 0                   | 0                  | 0                   |
| <b>seq1124</b> | Firmicutes    | Clostridia   | 0                  | 0                   | 0                  | 0                   |
| <b>seq1174</b> | Firmicutes    | Clostridia   | 0                  | 0                   | 0                  | 0                   |
| <b>seq1499</b> | Firmicutes    | Clostridia   | 0                  | 0                   | 0                  | 0                   |
| <b>seq6</b>    | Firmicutes    | Clostridia   | 0                  | 0                   | 5116               | 0                   |
| <b>seq28</b>   | Firmicutes    | Clostridia   | 0                  | 0                   | 0                  | 0                   |
| <b>seq194</b>  | Firmicutes    | Clostridia   | 0                  | 0                   | 0                  | 0                   |
| <b>seq210</b>  | Firmicutes    | Clostridia   | 0                  | 0                   | 0                  | 0                   |
| <b>seq799</b>  | Firmicutes    | Clostridia   | 0                  | 0                   | 0                  | 0                   |
| <b>seq1837</b> | Firmicutes    | Clostridia   | 0                  | 0                   | 0                  | 0                   |
| <b>seq12</b>   | Firmicutes    | Clostridia   | 2748               | 1781                | 1807               | 28                  |
| <b>seq23</b>   | Firmicutes    | Clostridia   | 1003               | 1599                | 0                  | 0                   |
| <b>seq241</b>  | Firmicutes    | Clostridia   | 59                 | 63                  | 0                  | 0                   |
| <b>seq306</b>  | Firmicutes    | Clostridia   | 0                  | 0                   | 0                  | 0                   |
| <b>seq339</b>  | Firmicutes    | Clostridia   | 0                  | 0                   | 0                  | 0                   |
| <b>seq381</b>  | Firmicutes    | Clostridia   | 0                  | 0                   | 0                  | 0                   |
| <b>seq399</b>  | Firmicutes    | Clostridia   | 38                 | 61                  | 0                  | 0                   |
| <b>seq756</b>  | Firmicutes    | Clostridia   | 0                  | 0                   | 0                  | 0                   |
| <b>seq820</b>  | Firmicutes    | Clostridia   | 0                  | 0                   | 0                  | 0                   |
| <b>seq874</b>  | Firmicutes    | Clostridia   | 0                  | 0                   | 0                  | 0                   |
| <b>seq901</b>  | Firmicutes    | Clostridia   | 0                  | 0                   | 0                  | 0                   |
| <b>seq905</b>  | Firmicutes    | Clostridia   | 0                  | 0                   | 0                  | 0                   |

Sequence Count Table

|                | <b>Phylum</b> | <b>Class</b> | <b>Subject10WK0</b> | <b>Subject10WK12</b> | <b>Subject22WK0</b> | <b>Subject22WK12</b> |
|----------------|---------------|--------------|---------------------|----------------------|---------------------|----------------------|
| <b>seq1628</b> | Firmicutes    | Clostridia   | 0                   | 0                    | 0                   | 0                    |
| <b>seq1752</b> | Firmicutes    | Clostridia   | 0                   | 0                    | 10                  | 0                    |
| <b>seq36</b>   | Firmicutes    | Clostridia   | 0                   | 0                    | 0                   | 0                    |
| <b>seq86</b>   | Firmicutes    | Clostridia   | 0                   | 0                    | 2081                | 1434                 |
| <b>seq197</b>  | Firmicutes    | Clostridia   | 0                   | 0                    | 0                   | 0                    |
| <b>seq211</b>  | Firmicutes    | Clostridia   | 0                   | 0                    | 0                   | 0                    |
| <b>seq217</b>  | Firmicutes    | Clostridia   | 0                   | 0                    | 0                   | 0                    |
| <b>seq300</b>  | Firmicutes    | Clostridia   | 0                   | 0                    | 0                   | 0                    |
| <b>seq383</b>  | Firmicutes    | Clostridia   | 29                  | 0                    | 0                   | 0                    |
| <b>seq491</b>  | Firmicutes    | Clostridia   | 0                   | 0                    | 0                   | 0                    |
| <b>seq544</b>  | Firmicutes    | Clostridia   | 0                   | 0                    | 0                   | 0                    |
| <b>seq1124</b> | Firmicutes    | Clostridia   | 0                   | 0                    | 0                   | 0                    |
| <b>seq1174</b> | Firmicutes    | Clostridia   | 0                   | 0                    | 0                   | 0                    |
| <b>seq1499</b> | Firmicutes    | Clostridia   | 0                   | 0                    | 0                   | 0                    |
| <b>seq6</b>    | Firmicutes    | Clostridia   | 3166                | 3119                 | 159                 | 89                   |
| <b>seq28</b>   | Firmicutes    | Clostridia   | 0                   | 0                    | 0                   | 3121                 |
| <b>seq194</b>  | Firmicutes    | Clostridia   | 0                   | 0                    | 0                   | 0                    |
| <b>seq210</b>  | Firmicutes    | Clostridia   | 0                   | 0                    | 0                   | 0                    |
| <b>seq799</b>  | Firmicutes    | Clostridia   | 0                   | 0                    | 0                   | 0                    |
| <b>seq1837</b> | Firmicutes    | Clostridia   | 0                   | 0                    | 0                   | 0                    |
| <b>seq12</b>   | Firmicutes    | Clostridia   | 2825                | 1198                 | 1465                | 1237                 |
| <b>seq23</b>   | Firmicutes    | Clostridia   | 1489                | 531                  | 1136                | 1380                 |
| <b>seq241</b>  | Firmicutes    | Clostridia   | 0                   | 0                    | 0                   | 0                    |
| <b>seq306</b>  | Firmicutes    | Clostridia   | 0                   | 0                    | 0                   | 0                    |
| <b>seq339</b>  | Firmicutes    | Clostridia   | 0                   | 0                    | 0                   | 0                    |
| <b>seq381</b>  | Firmicutes    | Clostridia   | 0                   | 0                    | 56                  | 93                   |
| <b>seq399</b>  | Firmicutes    | Clostridia   | 0                   | 0                    | 127                 | 167                  |
| <b>seq756</b>  | Firmicutes    | Clostridia   | 0                   | 0                    | 0                   | 0                    |
| <b>seq820</b>  | Firmicutes    | Clostridia   | 0                   | 0                    | 0                   | 0                    |
| <b>seq874</b>  | Firmicutes    | Clostridia   | 0                   | 0                    | 0                   | 0                    |
| <b>seq901</b>  | Firmicutes    | Clostridia   | 0                   | 0                    | 0                   | 0                    |
| <b>seq905</b>  | Firmicutes    | Clostridia   | 0                   | 0                    | 0                   | 0                    |

Sequence Count Table

|                | <b>Phylum</b> | <b>Class</b> | <b>Subject23WK0</b> | <b>Subject23WK12</b> | <b>Subject24WK0</b> | <b>Subject24WK12</b> |
|----------------|---------------|--------------|---------------------|----------------------|---------------------|----------------------|
| <b>seq1628</b> | Firmicutes    | Clostridia   | 0                   | 0                    | 0                   | 0                    |
| <b>seq1752</b> | Firmicutes    | Clostridia   | 0                   | 0                    | 0                   | 0                    |
| <b>seq36</b>   | Firmicutes    | Clostridia   | 1733                | 3173                 | 3097                | 0                    |
| <b>seq86</b>   | Firmicutes    | Clostridia   | 632                 | 660                  | 0                   | 0                    |
| <b>seq197</b>  | Firmicutes    | Clostridia   | 0                   | 0                    | 0                   | 1007                 |
| <b>seq211</b>  | Firmicutes    | Clostridia   | 789                 | 1537                 | 1063                | 0                    |
| <b>seq217</b>  | Firmicutes    | Clostridia   | 0                   | 0                    | 950                 | 0                    |
| <b>seq300</b>  | Firmicutes    | Clostridia   | 0                   | 0                    | 0                   | 0                    |
| <b>seq383</b>  | Firmicutes    | Clostridia   | 0                   | 0                    | 0                   | 0                    |
| <b>seq491</b>  | Firmicutes    | Clostridia   | 0                   | 0                    | 0                   | 0                    |
| <b>seq544</b>  | Firmicutes    | Clostridia   | 0                   | 653                  | 0                   | 0                    |
| <b>seq1124</b> | Firmicutes    | Clostridia   | 0                   | 0                    | 0                   | 0                    |
| <b>seq1174</b> | Firmicutes    | Clostridia   | 0                   | 0                    | 0                   | 0                    |
| <b>seq1499</b> | Firmicutes    | Clostridia   | 0                   | 0                    | 0                   | 0                    |
| <b>seq6</b>    | Firmicutes    | Clostridia   | 5220                | 5208                 | 0                   | 4619                 |
| <b>seq28</b>   | Firmicutes    | Clostridia   | 0                   | 0                    | 3863                | 0                    |
| <b>seq194</b>  | Firmicutes    | Clostridia   | 0                   | 0                    | 0                   | 0                    |
| <b>seq210</b>  | Firmicutes    | Clostridia   | 0                   | 0                    | 0                   | 0                    |
| <b>seq799</b>  | Firmicutes    | Clostridia   | 0                   | 0                    | 0                   | 0                    |
| <b>seq1837</b> | Firmicutes    | Clostridia   | 0                   | 0                    | 0                   | 0                    |
| <b>seq12</b>   | Firmicutes    | Clostridia   | 294                 | 1677                 | 3130                | 1055                 |
| <b>seq23</b>   | Firmicutes    | Clostridia   | 4312                | 4808                 | 1662                | 1236                 |
| <b>seq241</b>  | Firmicutes    | Clostridia   | 259                 | 293                  | 389                 | 556                  |
| <b>seq306</b>  | Firmicutes    | Clostridia   | 0                   | 0                    | 0                   | 0                    |
| <b>seq339</b>  | Firmicutes    | Clostridia   | 0                   | 0                    | 0                   | 0                    |
| <b>seq381</b>  | Firmicutes    | Clostridia   | 149                 | 189                  | 0                   | 0                    |
| <b>seq399</b>  | Firmicutes    | Clostridia   | 166                 | 101                  | 71                  | 106                  |
| <b>seq756</b>  | Firmicutes    | Clostridia   | 0                   | 0                    | 0                   | 0                    |
| <b>seq820</b>  | Firmicutes    | Clostridia   | 0                   | 0                    | 0                   | 0                    |
| <b>seq874</b>  | Firmicutes    | Clostridia   | 0                   | 0                    | 0                   | 0                    |
| <b>seq901</b>  | Firmicutes    | Clostridia   | 0                   | 0                    | 0                   | 0                    |
| <b>seq905</b>  | Firmicutes    | Clostridia   | 0                   | 192                  | 0                   | 0                    |

Sequence Count Table

|                | <b>Phylum</b> | <b>Class</b> | <b>Subject11WK0</b> | <b>Subject11WK12</b> | <b>Subject12WK0</b> | <b>Subject12WK12</b> |
|----------------|---------------|--------------|---------------------|----------------------|---------------------|----------------------|
| <b>seq1628</b> | Firmicutes    | Clostridia   | 0                   | 0                    | 0                   | 0                    |
| <b>seq1752</b> | Firmicutes    | Clostridia   | 0                   | 0                    | 0                   | 0                    |
| <b>seq36</b>   | Firmicutes    | Clostridia   | 2479                | 300                  | 1160                | 319                  |
| <b>seq86</b>   | Firmicutes    | Clostridia   | 0                   | 0                    | 0                   | 0                    |
| <b>seq197</b>  | Firmicutes    | Clostridia   | 0                   | 0                    | 0                   | 0                    |
| <b>seq211</b>  | Firmicutes    | Clostridia   | 0                   | 0                    | 0                   | 0                    |
| <b>seq217</b>  | Firmicutes    | Clostridia   | 0                   | 0                    | 0                   | 0                    |
| <b>seq300</b>  | Firmicutes    | Clostridia   | 0                   | 0                    | 0                   | 0                    |
| <b>seq383</b>  | Firmicutes    | Clostridia   | 0                   | 0                    | 0                   | 0                    |
| <b>seq491</b>  | Firmicutes    | Clostridia   | 755                 | 15                   | 0                   | 0                    |
| <b>seq544</b>  | Firmicutes    | Clostridia   | 0                   | 0                    | 0                   | 0                    |
| <b>seq1124</b> | Firmicutes    | Clostridia   | 0                   | 0                    | 0                   | 0                    |
| <b>seq1174</b> | Firmicutes    | Clostridia   | 0                   | 0                    | 0                   | 0                    |
| <b>seq1499</b> | Firmicutes    | Clostridia   | 0                   | 0                    | 0                   | 0                    |
| <b>seq6</b>    | Firmicutes    | Clostridia   | 0                   | 0                    | 21                  | 0                    |
| <b>seq28</b>   | Firmicutes    | Clostridia   | 0                   | 0                    | 0                   | 0                    |
| <b>seq194</b>  | Firmicutes    | Clostridia   | 0                   | 0                    | 0                   | 0                    |
| <b>seq210</b>  | Firmicutes    | Clostridia   | 0                   | 0                    | 0                   | 0                    |
| <b>seq799</b>  | Firmicutes    | Clostridia   | 0                   | 0                    | 0                   | 0                    |
| <b>seq1837</b> | Firmicutes    | Clostridia   | 0                   | 0                    | 0                   | 0                    |
| <b>seq12</b>   | Firmicutes    | Clostridia   | 2999                | 4210                 | 1537                | 1623                 |
| <b>seq23</b>   | Firmicutes    | Clostridia   | 0                   | 0                    | 783                 | 580                  |
| <b>seq241</b>  | Firmicutes    | Clostridia   | 0                   | 0                    | 0                   | 0                    |
| <b>seq306</b>  | Firmicutes    | Clostridia   | 0                   | 0                    | 0                   | 0                    |
| <b>seq339</b>  | Firmicutes    | Clostridia   | 739                 | 997                  | 0                   | 0                    |
| <b>seq381</b>  | Firmicutes    | Clostridia   | 0                   | 0                    | 103                 | 143                  |
| <b>seq399</b>  | Firmicutes    | Clostridia   | 0                   | 0                    | 0                   | 22                   |
| <b>seq756</b>  | Firmicutes    | Clostridia   | 0                   | 0                    | 0                   | 0                    |
| <b>seq820</b>  | Firmicutes    | Clostridia   | 0                   | 0                    | 0                   | 0                    |
| <b>seq874</b>  | Firmicutes    | Clostridia   | 0                   | 0                    | 0                   | 0                    |
| <b>seq901</b>  | Firmicutes    | Clostridia   | 0                   | 0                    | 0                   | 0                    |
| <b>seq905</b>  | Firmicutes    | Clostridia   | 0                   | 0                    | 0                   | 0                    |

Sequence Count Table

|                | <b>Phylum</b> | <b>Class</b> | <b>Subject25WK0</b> | <b>Subject25WK12</b> | <b>Subject38WK0</b> | <b>Subject38WK12</b> |
|----------------|---------------|--------------|---------------------|----------------------|---------------------|----------------------|
| <b>seq1628</b> | Firmicutes    | Clostridia   | 0                   | 0                    | 0                   | 0                    |
| <b>seq1752</b> | Firmicutes    | Clostridia   | 0                   | 0                    | 0                   | 0                    |
| <b>seq36</b>   | Firmicutes    | Clostridia   | 0                   | 0                    | 0                   | 0                    |
| <b>seq86</b>   | Firmicutes    | Clostridia   | 0                   | 0                    | 0                   | 0                    |
| <b>seq197</b>  | Firmicutes    | Clostridia   | 568                 | 0                    | 0                   | 0                    |
| <b>seq211</b>  | Firmicutes    | Clostridia   | 0                   | 0                    | 0                   | 0                    |
| <b>seq217</b>  | Firmicutes    | Clostridia   | 0                   | 0                    | 0                   | 0                    |
| <b>seq300</b>  | Firmicutes    | Clostridia   | 0                   | 0                    | 0                   | 0                    |
| <b>seq383</b>  | Firmicutes    | Clostridia   | 0                   | 0                    | 0                   | 0                    |
| <b>seq491</b>  | Firmicutes    | Clostridia   | 0                   | 0                    | 0                   | 0                    |
| <b>seq544</b>  | Firmicutes    | Clostridia   | 0                   | 0                    | 0                   | 0                    |
| <b>seq1124</b> | Firmicutes    | Clostridia   | 0                   | 0                    | 0                   | 0                    |
| <b>seq1174</b> | Firmicutes    | Clostridia   | 0                   | 0                    | 0                   | 0                    |
| <b>seq1499</b> | Firmicutes    | Clostridia   | 0                   | 0                    | 0                   | 0                    |
| <b>seq6</b>    | Firmicutes    | Clostridia   | 8949                | 0                    | 0                   | 0                    |
| <b>seq28</b>   | Firmicutes    | Clostridia   | 0                   | 0                    | 0                   | 0                    |
| <b>seq194</b>  | Firmicutes    | Clostridia   | 0                   | 0                    | 0                   | 0                    |
| <b>seq210</b>  | Firmicutes    | Clostridia   | 4660                | 0                    | 0                   | 0                    |
| <b>seq799</b>  | Firmicutes    | Clostridia   | 0                   | 0                    | 0                   | 0                    |
| <b>seq1837</b> | Firmicutes    | Clostridia   | 6                   | 0                    | 0                   | 0                    |
| <b>seq12</b>   | Firmicutes    | Clostridia   | 2034                | 2937                 | 0                   | 0                    |
| <b>seq23</b>   | Firmicutes    | Clostridia   | 1668                | 256                  | 0                   | 0                    |
| <b>seq241</b>  | Firmicutes    | Clostridia   | 0                   | 0                    | 0                   | 0                    |
| <b>seq306</b>  | Firmicutes    | Clostridia   | 0                   | 0                    | 0                   | 0                    |
| <b>seq339</b>  | Firmicutes    | Clostridia   | 0                   | 0                    | 0                   | 0                    |
| <b>seq381</b>  | Firmicutes    | Clostridia   | 0                   | 0                    | 0                   | 0                    |
| <b>seq399</b>  | Firmicutes    | Clostridia   | 0                   | 0                    | 0                   | 0                    |
| <b>seq756</b>  | Firmicutes    | Clostridia   | 0                   | 0                    | 0                   | 0                    |
| <b>seq820</b>  | Firmicutes    | Clostridia   | 0                   | 0                    | 0                   | 0                    |
| <b>seq874</b>  | Firmicutes    | Clostridia   | 0                   | 0                    | 0                   | 0                    |
| <b>seq901</b>  | Firmicutes    | Clostridia   | 0                   | 0                    | 0                   | 0                    |
| <b>seq905</b>  | Firmicutes    | Clostridia   | 0                   | 0                    | 0                   | 0                    |

Sequence Count Table

|                | <b>Phylum</b> | <b>Class</b> | <b>Subject31WK0</b> | <b>Subject31WK12</b> | <b>Subject32WK0</b> | <b>Subject32WK12</b> |
|----------------|---------------|--------------|---------------------|----------------------|---------------------|----------------------|
| <b>seq1628</b> | Firmicutes    | Clostridia   | 0                   | 0                    | 0                   | 0                    |
| <b>seq1752</b> | Firmicutes    | Clostridia   | 0                   | 0                    | 0                   | 0                    |
| <b>seq36</b>   | Firmicutes    | Clostridia   | 0                   | 0                    | 0                   | 0                    |
| <b>seq86</b>   | Firmicutes    | Clostridia   | 0                   | 0                    | 0                   | 0                    |
| <b>seq197</b>  | Firmicutes    | Clostridia   | 0                   | 0                    | 0                   | 0                    |
| <b>seq211</b>  | Firmicutes    | Clostridia   | 0                   | 0                    | 0                   | 0                    |
| <b>seq217</b>  | Firmicutes    | Clostridia   | 0                   | 0                    | 1351                | 0                    |
| <b>seq300</b>  | Firmicutes    | Clostridia   | 0                   | 0                    | 0                   | 0                    |
| <b>seq383</b>  | Firmicutes    | Clostridia   | 0                   | 0                    | 0                   | 0                    |
| <b>seq491</b>  | Firmicutes    | Clostridia   | 0                   | 0                    | 0                   | 0                    |
| <b>seq544</b>  | Firmicutes    | Clostridia   | 0                   | 0                    | 0                   | 0                    |
| <b>seq1124</b> | Firmicutes    | Clostridia   | 0                   | 0                    | 0                   | 0                    |
| <b>seq1174</b> | Firmicutes    | Clostridia   | 0                   | 0                    | 0                   | 0                    |
| <b>seq1499</b> | Firmicutes    | Clostridia   | 0                   | 0                    | 0                   | 0                    |
| <b>seq6</b>    | Firmicutes    | Clostridia   | 0                   | 0                    | 2303                | 0                    |
| <b>seq28</b>   | Firmicutes    | Clostridia   | 0                   | 0                    | 0                   | 0                    |
| <b>seq194</b>  | Firmicutes    | Clostridia   | 0                   | 0                    | 0                   | 0                    |
| <b>seq210</b>  | Firmicutes    | Clostridia   | 0                   | 0                    | 0                   | 0                    |
| <b>seq799</b>  | Firmicutes    | Clostridia   | 0                   | 0                    | 0                   | 0                    |
| <b>seq1837</b> | Firmicutes    | Clostridia   | 0                   | 0                    | 0                   | 0                    |
| <b>seq12</b>   | Firmicutes    | Clostridia   | 0                   | 0                    | 0                   | 0                    |
| <b>seq23</b>   | Firmicutes    | Clostridia   | 0                   | 0                    | 1853                | 0                    |
| <b>seq241</b>  | Firmicutes    | Clostridia   | 0                   | 0                    | 0                   | 0                    |
| <b>seq306</b>  | Firmicutes    | Clostridia   | 0                   | 0                    | 0                   | 0                    |
| <b>seq339</b>  | Firmicutes    | Clostridia   | 0                   | 0                    | 0                   | 0                    |
| <b>seq381</b>  | Firmicutes    | Clostridia   | 0                   | 0                    | 0                   | 0                    |
| <b>seq399</b>  | Firmicutes    | Clostridia   | 0                   | 0                    | 0                   | 0                    |
| <b>seq756</b>  | Firmicutes    | Clostridia   | 0                   | 0                    | 0                   | 0                    |
| <b>seq820</b>  | Firmicutes    | Clostridia   | 0                   | 0                    | 0                   | 0                    |
| <b>seq874</b>  | Firmicutes    | Clostridia   | 0                   | 0                    | 0                   | 0                    |
| <b>seq901</b>  | Firmicutes    | Clostridia   | 0                   | 0                    | 0                   | 0                    |
| <b>seq905</b>  | Firmicutes    | Clostridia   | 0                   | 0                    | 0                   | 0                    |

Sequence Count Table

|                | <b>Phylum</b> | <b>Class</b> | <b>Subject13WK0</b> | <b>Subject13WK12</b> | <b>Subject39WK0</b> | <b>Subject39WK12</b> |
|----------------|---------------|--------------|---------------------|----------------------|---------------------|----------------------|
| <b>seq1628</b> | Firmicutes    | Clostridia   | 0                   | 0                    | 0                   | 0                    |
| <b>seq1752</b> | Firmicutes    | Clostridia   | 0                   | 0                    | 0                   | 0                    |
| <b>seq36</b>   | Firmicutes    | Clostridia   | 0                   | 0                    | 0                   | 669                  |
| <b>seq86</b>   | Firmicutes    | Clostridia   | 0                   | 0                    | 0                   | 542                  |
| <b>seq197</b>  | Firmicutes    | Clostridia   | 0                   | 0                    | 0                   | 0                    |
| <b>seq211</b>  | Firmicutes    | Clostridia   | 0                   | 0                    | 0                   | 0                    |
| <b>seq217</b>  | Firmicutes    | Clostridia   | 0                   | 0                    | 0                   | 0                    |
| <b>seq300</b>  | Firmicutes    | Clostridia   | 0                   | 0                    | 0                   | 0                    |
| <b>seq383</b>  | Firmicutes    | Clostridia   | 593                 | 728                  | 0                   | 0                    |
| <b>seq491</b>  | Firmicutes    | Clostridia   | 0                   | 0                    | 0                   | 0                    |
| <b>seq544</b>  | Firmicutes    | Clostridia   | 0                   | 0                    | 0                   | 0                    |
| <b>seq1124</b> | Firmicutes    | Clostridia   | 0                   | 0                    | 0                   | 0                    |
| <b>seq1174</b> | Firmicutes    | Clostridia   | 0                   | 0                    | 0                   | 0                    |
| <b>seq1499</b> | Firmicutes    | Clostridia   | 0                   | 0                    | 0                   | 0                    |
| <b>seq6</b>    | Firmicutes    | Clostridia   | 0                   | 0                    | 0                   | 0                    |
| <b>seq28</b>   | Firmicutes    | Clostridia   | 4279                | 0                    | 0                   | 0                    |
| <b>seq194</b>  | Firmicutes    | Clostridia   | 0                   | 0                    | 0                   | 0                    |
| <b>seq210</b>  | Firmicutes    | Clostridia   | 0                   | 0                    | 0                   | 0                    |
| <b>seq799</b>  | Firmicutes    | Clostridia   | 0                   | 0                    | 0                   | 0                    |
| <b>seq1837</b> | Firmicutes    | Clostridia   | 0                   | 0                    | 0                   | 0                    |
| <b>seq12</b>   | Firmicutes    | Clostridia   | 1465                | 1808                 | 0                   | 864                  |
| <b>seq23</b>   | Firmicutes    | Clostridia   | 1940                | 1499                 | 0                   | 1836                 |
| <b>seq241</b>  | Firmicutes    | Clostridia   | 400                 | 71                   | 0                   | 174                  |
| <b>seq306</b>  | Firmicutes    | Clostridia   | 0                   | 0                    | 0                   | 0                    |
| <b>seq339</b>  | Firmicutes    | Clostridia   | 0                   | 0                    | 0                   | 0                    |
| <b>seq381</b>  | Firmicutes    | Clostridia   | 0                   | 0                    | 0                   | 93                   |
| <b>seq399</b>  | Firmicutes    | Clostridia   | 0                   | 0                    | 0                   | 0                    |
| <b>seq756</b>  | Firmicutes    | Clostridia   | 0                   | 0                    | 0                   | 0                    |
| <b>seq820</b>  | Firmicutes    | Clostridia   | 150                 | 0                    | 0                   | 0                    |
| <b>seq874</b>  | Firmicutes    | Clostridia   | 0                   | 0                    | 0                   | 0                    |
| <b>seq901</b>  | Firmicutes    | Clostridia   | 0                   | 0                    | 0                   | 0                    |
| <b>seq905</b>  | Firmicutes    | Clostridia   | 0                   | 0                    | 0                   | 0                    |



Sequence Count Table

|                | <b>Phylum</b> | <b>Class</b> | <b>Subject26WK0</b> | <b>Subject26WK12</b> | <b>Subject14WK0</b> | <b>Subject14WK12</b> |
|----------------|---------------|--------------|---------------------|----------------------|---------------------|----------------------|
| <b>seq1628</b> | Firmicutes    | Clostridia   | 0                   | 0                    | 0                   | 0                    |
| <b>seq1752</b> | Firmicutes    | Clostridia   | 0                   | 0                    | 0                   | 0                    |
| <b>seq36</b>   | Firmicutes    | Clostridia   | 5                   | 0                    | 5990                | 4003                 |
| <b>seq86</b>   | Firmicutes    | Clostridia   | 0                   | 0                    | 1775                | 517                  |
| <b>seq197</b>  | Firmicutes    | Clostridia   | 0                   | 0                    | 0                   | 0                    |
| <b>seq211</b>  | Firmicutes    | Clostridia   | 96                  | 0                    | 307                 | 526                  |
| <b>seq217</b>  | Firmicutes    | Clostridia   | 0                   | 0                    | 0                   | 0                    |
| <b>seq300</b>  | Firmicutes    | Clostridia   | 0                   | 0                    | 0                   | 0                    |
| <b>seq383</b>  | Firmicutes    | Clostridia   | 0                   | 0                    | 0                   | 0                    |
| <b>seq491</b>  | Firmicutes    | Clostridia   | 0                   | 0                    | 0                   | 0                    |
| <b>seq544</b>  | Firmicutes    | Clostridia   | 0                   | 0                    | 0                   | 0                    |
| <b>seq1124</b> | Firmicutes    | Clostridia   | 0                   | 0                    | 0                   | 99                   |
| <b>seq1174</b> | Firmicutes    | Clostridia   | 0                   | 0                    | 0                   | 0                    |
| <b>seq1499</b> | Firmicutes    | Clostridia   | 0                   | 0                    | 0                   | 0                    |
| <b>seq6</b>    | Firmicutes    | Clostridia   | 7177                | 39                   | 7518                | 15337                |
| <b>seq28</b>   | Firmicutes    | Clostridia   | 0                   | 0                    | 0                   | 0                    |
| <b>seq194</b>  | Firmicutes    | Clostridia   | 0                   | 0                    | 0                   | 768                  |
| <b>seq210</b>  | Firmicutes    | Clostridia   | 0                   | 0                    | 0                   | 0                    |
| <b>seq799</b>  | Firmicutes    | Clostridia   | 0                   | 0                    | 0                   | 0                    |
| <b>seq1837</b> | Firmicutes    | Clostridia   | 0                   | 0                    | 0                   | 0                    |
| <b>seq12</b>   | Firmicutes    | Clostridia   | 0                   | 0                    | 219                 | 336                  |
| <b>seq23</b>   | Firmicutes    | Clostridia   | 0                   | 0                    | 3899                | 3594                 |
| <b>seq241</b>  | Firmicutes    | Clostridia   | 0                   | 0                    | 87                  | 33                   |
| <b>seq306</b>  | Firmicutes    | Clostridia   | 0                   | 0                    | 0                   | 0                    |
| <b>seq339</b>  | Firmicutes    | Clostridia   | 0                   | 0                    | 0                   | 0                    |
| <b>seq381</b>  | Firmicutes    | Clostridia   | 0                   | 0                    | 0                   | 0                    |
| <b>seq399</b>  | Firmicutes    | Clostridia   | 0                   | 0                    | 0                   | 0                    |
| <b>seq756</b>  | Firmicutes    | Clostridia   | 0                   | 0                    | 0                   | 0                    |
| <b>seq820</b>  | Firmicutes    | Clostridia   | 0                   | 0                    | 0                   | 0                    |
| <b>seq874</b>  | Firmicutes    | Clostridia   | 0                   | 0                    | 0                   | 0                    |
| <b>seq901</b>  | Firmicutes    | Clostridia   | 0                   | 0                    | 0                   | 0                    |
| <b>seq905</b>  | Firmicutes    | Clostridia   | 0                   | 0                    | 0                   | 0                    |

Sequence Count Table

|                | <b>Phylum</b> | <b>Class</b> | <b>Subject27WK0</b> | <b>Subject27WK12</b> | <b>Subject15WK0</b> | <b>Subject15WK12</b> |
|----------------|---------------|--------------|---------------------|----------------------|---------------------|----------------------|
| <b>seq1628</b> | Firmicutes    | Clostridia   | 0                   | 0                    | 0                   | 0                    |
| <b>seq1752</b> | Firmicutes    | Clostridia   | 0                   | 0                    | 0                   | 0                    |
| <b>seq36</b>   | Firmicutes    | Clostridia   | 0                   | 1194                 | 204                 | 408                  |
| <b>seq86</b>   | Firmicutes    | Clostridia   | 0                   | 0                    | 0                   | 0                    |
| <b>seq197</b>  | Firmicutes    | Clostridia   | 0                   | 0                    | 0                   | 0                    |
| <b>seq211</b>  | Firmicutes    | Clostridia   | 0                   | 0                    | 0                   | 0                    |
| <b>seq217</b>  | Firmicutes    | Clostridia   | 0                   | 513                  | 463                 | 153                  |
| <b>seq300</b>  | Firmicutes    | Clostridia   | 0                   | 0                    | 0                   | 0                    |
| <b>seq383</b>  | Firmicutes    | Clostridia   | 0                   | 0                    | 0                   | 0                    |
| <b>seq491</b>  | Firmicutes    | Clostridia   | 0                   | 0                    | 0                   | 0                    |
| <b>seq544</b>  | Firmicutes    | Clostridia   | 0                   | 0                    | 0                   | 0                    |
| <b>seq1124</b> | Firmicutes    | Clostridia   | 0                   | 0                    | 0                   | 0                    |
| <b>seq1174</b> | Firmicutes    | Clostridia   | 0                   | 0                    | 0                   | 0                    |
| <b>seq1499</b> | Firmicutes    | Clostridia   | 0                   | 0                    | 0                   | 0                    |
| <b>seq6</b>    | Firmicutes    | Clostridia   | 4065                | 5165                 | 4420                | 213                  |
| <b>seq28</b>   | Firmicutes    | Clostridia   | 0                   | 0                    | 0                   | 0                    |
| <b>seq194</b>  | Firmicutes    | Clostridia   | 0                   | 0                    | 0                   | 0                    |
| <b>seq210</b>  | Firmicutes    | Clostridia   | 0                   | 0                    | 0                   | 0                    |
| <b>seq799</b>  | Firmicutes    | Clostridia   | 0                   | 0                    | 0                   | 0                    |
| <b>seq1837</b> | Firmicutes    | Clostridia   | 0                   | 0                    | 0                   | 0                    |
| <b>seq12</b>   | Firmicutes    | Clostridia   | 680                 | 1177                 | 1165                | 963                  |
| <b>seq23</b>   | Firmicutes    | Clostridia   | 654                 | 708                  | 231                 | 19                   |
| <b>seq241</b>  | Firmicutes    | Clostridia   | 0                   | 216                  | 0                   | 0                    |
| <b>seq306</b>  | Firmicutes    | Clostridia   | 0                   | 0                    | 0                   | 0                    |
| <b>seq339</b>  | Firmicutes    | Clostridia   | 0                   | 0                    | 0                   | 0                    |
| <b>seq381</b>  | Firmicutes    | Clostridia   | 0                   | 0                    | 0                   | 0                    |
| <b>seq399</b>  | Firmicutes    | Clostridia   | 0                   | 0                    | 0                   | 0                    |
| <b>seq756</b>  | Firmicutes    | Clostridia   | 0                   | 0                    | 0                   | 0                    |
| <b>seq820</b>  | Firmicutes    | Clostridia   | 0                   | 0                    | 0                   | 0                    |
| <b>seq874</b>  | Firmicutes    | Clostridia   | 0                   | 0                    | 0                   | 0                    |
| <b>seq901</b>  | Firmicutes    | Clostridia   | 0                   | 0                    | 0                   | 0                    |
| <b>seq905</b>  | Firmicutes    | Clostridia   | 0                   | 0                    | 0                   | 0                    |

Sequence Count Table

|                | <b>Phylum</b> | <b>Class</b> | <b>Δ</b> |  |  |  |
|----------------|---------------|--------------|----------|--|--|--|
| <b>seq1628</b> | Firmicutes    | Clostridia   |          |  |  |  |
| <b>seq1752</b> | Firmicutes    | Clostridia   |          |  |  |  |
| <b>seq36</b>   | Firmicutes    | Clostridia   |          |  |  |  |
| <b>seq86</b>   | Firmicutes    | Clostridia   |          |  |  |  |
| <b>seq197</b>  | Firmicutes    | Clostridia   |          |  |  |  |
| <b>seq211</b>  | Firmicutes    | Clostridia   |          |  |  |  |
| <b>seq217</b>  | Firmicutes    | Clostridia   |          |  |  |  |
| <b>seq300</b>  | Firmicutes    | Clostridia   |          |  |  |  |
| <b>seq383</b>  | Firmicutes    | Clostridia   |          |  |  |  |
| <b>seq491</b>  | Firmicutes    | Clostridia   |          |  |  |  |
| <b>seq544</b>  | Firmicutes    | Clostridia   |          |  |  |  |
| <b>seq1124</b> | Firmicutes    | Clostridia   |          |  |  |  |
| <b>seq1174</b> | Firmicutes    | Clostridia   |          |  |  |  |
| <b>seq1499</b> | Firmicutes    | Clostridia   |          |  |  |  |
| <b>seq6</b>    | Firmicutes    | Clostridia   |          |  |  |  |
| <b>seq28</b>   | Firmicutes    | Clostridia   |          |  |  |  |
| <b>seq194</b>  | Firmicutes    | Clostridia   |          |  |  |  |
| <b>seq210</b>  | Firmicutes    | Clostridia   |          |  |  |  |
| <b>seq799</b>  | Firmicutes    | Clostridia   |          |  |  |  |
| <b>seq1837</b> | Firmicutes    | Clostridia   |          |  |  |  |
| <b>seq12</b>   | Firmicutes    | Clostridia   |          |  |  |  |
| <b>seq23</b>   | Firmicutes    | Clostridia   |          |  |  |  |
| <b>seq241</b>  | Firmicutes    | Clostridia   |          |  |  |  |
| <b>seq306</b>  | Firmicutes    | Clostridia   |          |  |  |  |
| <b>seq339</b>  | Firmicutes    | Clostridia   |          |  |  |  |
| <b>seq381</b>  | Firmicutes    | Clostridia   |          |  |  |  |
| <b>seq399</b>  | Firmicutes    | Clostridia   |          |  |  |  |
| <b>seq756</b>  | Firmicutes    | Clostridia   |          |  |  |  |
| <b>seq820</b>  | Firmicutes    | Clostridia   |          |  |  |  |
| <b>seq874</b>  | Firmicutes    | Clostridia   |          |  |  |  |
| <b>seq901</b>  | Firmicutes    | Clostridia   |          |  |  |  |
| <b>seq905</b>  | Firmicutes    | Clostridia   |          |  |  |  |

Sequence Count Table

|                | <b>Phylum</b> | <b>Class</b> | <b>Order</b>  | <b>Family</b>   |
|----------------|---------------|--------------|---------------|-----------------|
| <b>seq921</b>  | Firmicutes    | Clostridia   | Clostridiales | Ruminococcaceae |
| <b>seq978</b>  | Firmicutes    | Clostridia   | Clostridiales | Ruminococcaceae |
| <b>seq999</b>  | Firmicutes    | Clostridia   | Clostridiales | Ruminococcaceae |
| <b>seq1067</b> | Firmicutes    | Clostridia   | Clostridiales | Ruminococcaceae |
| <b>seq1074</b> | Firmicutes    | Clostridia   | Clostridiales | Ruminococcaceae |
| <b>seq1143</b> | Firmicutes    | Clostridia   | Clostridiales | Ruminococcaceae |
| <b>seq1421</b> | Firmicutes    | Clostridia   | Clostridiales | Ruminococcaceae |
| <b>seq244</b>  | Firmicutes    | Clostridia   | Clostridiales | Ruminococcaceae |
| <b>seq59</b>   | Firmicutes    | Clostridia   | Clostridiales | Ruminococcaceae |
| <b>seq112</b>  | Firmicutes    | Clostridia   | Clostridiales | Ruminococcaceae |
| <b>seq114</b>  | Firmicutes    | Clostridia   | Clostridiales | Ruminococcaceae |
| <b>seq181</b>  | Firmicutes    | Clostridia   | Clostridiales | Ruminococcaceae |
| <b>seq196</b>  | Firmicutes    | Clostridia   | Clostridiales | Ruminococcaceae |
| <b>seq199</b>  | Firmicutes    | Clostridia   | Clostridiales | Ruminococcaceae |
| <b>seq227</b>  | Firmicutes    | Clostridia   | Clostridiales | Ruminococcaceae |
| <b>seq232</b>  | Firmicutes    | Clostridia   | Clostridiales | Ruminococcaceae |
| <b>seq281</b>  | Firmicutes    | Clostridia   | Clostridiales | Ruminococcaceae |
| <b>seq308</b>  | Firmicutes    | Clostridia   | Clostridiales | Ruminococcaceae |
| <b>seq309</b>  | Firmicutes    | Clostridia   | Clostridiales | Ruminococcaceae |
| <b>seq338</b>  | Firmicutes    | Clostridia   | Clostridiales | Ruminococcaceae |
| <b>seq382</b>  | Firmicutes    | Clostridia   | Clostridiales | Ruminococcaceae |
| <b>seq385</b>  | Firmicutes    | Clostridia   | Clostridiales | Ruminococcaceae |
| <b>seq387</b>  | Firmicutes    | Clostridia   | Clostridiales | Ruminococcaceae |
| <b>seq393</b>  | Firmicutes    | Clostridia   | Clostridiales | Ruminococcaceae |
| <b>seq398</b>  | Firmicutes    | Clostridia   | Clostridiales | Ruminococcaceae |
| <b>seq415</b>  | Firmicutes    | Clostridia   | Clostridiales | Ruminococcaceae |
| <b>seq417</b>  | Firmicutes    | Clostridia   | Clostridiales | Ruminococcaceae |
| <b>seq478</b>  | Firmicutes    | Clostridia   | Clostridiales | Ruminococcaceae |
| <b>seq501</b>  | Firmicutes    | Clostridia   | Clostridiales | Ruminococcaceae |
| <b>seq505</b>  | Firmicutes    | Clostridia   | Clostridiales | Ruminococcaceae |
| <b>seq513</b>  | Firmicutes    | Clostridia   | Clostridiales | Ruminococcaceae |
| <b>seq515</b>  | Firmicutes    | Clostridia   | Clostridiales | Ruminococcaceae |

Sequence Count Table

|                | <b>Phylum</b> | <b>Class</b> | <b>Genus</b>    | <b>Species</b> |
|----------------|---------------|--------------|-----------------|----------------|
| <b>seq921</b>  | Firmicutes    | Clostridia   | Subdoligranulum |                |
| <b>seq978</b>  | Firmicutes    | Clostridia   | Subdoligranulum |                |
| <b>seq999</b>  | Firmicutes    | Clostridia   | Subdoligranulum |                |
| <b>seq1067</b> | Firmicutes    | Clostridia   | Subdoligranulum |                |
| <b>seq1074</b> | Firmicutes    | Clostridia   | Subdoligranulum |                |
| <b>seq1143</b> | Firmicutes    | Clostridia   | Subdoligranulum |                |
| <b>seq1421</b> | Firmicutes    | Clostridia   | Subdoligranulum |                |
| <b>seq244</b>  | Firmicutes    | Clostridia   | UBA1819         |                |
| <b>seq59</b>   | Firmicutes    | Clostridia   |                 |                |
| <b>seq112</b>  | Firmicutes    | Clostridia   |                 |                |
| <b>seq114</b>  | Firmicutes    | Clostridia   |                 |                |
| <b>seq181</b>  | Firmicutes    | Clostridia   |                 |                |
| <b>seq196</b>  | Firmicutes    | Clostridia   |                 |                |
| <b>seq199</b>  | Firmicutes    | Clostridia   |                 |                |
| <b>seq227</b>  | Firmicutes    | Clostridia   |                 |                |
| <b>seq232</b>  | Firmicutes    | Clostridia   |                 |                |
| <b>seq281</b>  | Firmicutes    | Clostridia   |                 |                |
| <b>seq308</b>  | Firmicutes    | Clostridia   |                 |                |
| <b>seq309</b>  | Firmicutes    | Clostridia   |                 |                |
| <b>seq338</b>  | Firmicutes    | Clostridia   |                 |                |
| <b>seq382</b>  | Firmicutes    | Clostridia   |                 |                |
| <b>seq385</b>  | Firmicutes    | Clostridia   |                 |                |
| <b>seq387</b>  | Firmicutes    | Clostridia   |                 |                |
| <b>seq393</b>  | Firmicutes    | Clostridia   |                 |                |
| <b>seq398</b>  | Firmicutes    | Clostridia   |                 |                |
| <b>seq415</b>  | Firmicutes    | Clostridia   |                 |                |
| <b>seq417</b>  | Firmicutes    | Clostridia   |                 |                |
| <b>seq478</b>  | Firmicutes    | Clostridia   |                 |                |
| <b>seq501</b>  | Firmicutes    | Clostridia   |                 |                |
| <b>seq505</b>  | Firmicutes    | Clostridia   |                 |                |
| <b>seq513</b>  | Firmicutes    | Clostridia   |                 |                |
| <b>seq515</b>  | Firmicutes    | Clostridia   |                 |                |

Sequence Count Table

|                | <b>Phylum</b> | <b>Class</b> | <b>Subject34WK0</b> | <b>Subject34WK12</b> | <b>Subject16WK0</b> | <b>Subject16WK12</b> |
|----------------|---------------|--------------|---------------------|----------------------|---------------------|----------------------|
| <b>seq921</b>  | Firmicutes    | Clostridia   | 0                   | 0                    | 78                  | 105                  |
| <b>seq978</b>  | Firmicutes    | Clostridia   | 0                   | 0                    | 0                   | 0                    |
| <b>seq999</b>  | Firmicutes    | Clostridia   | 0                   | 0                    | 0                   | 0                    |
| <b>seq1067</b> | Firmicutes    | Clostridia   | 0                   | 0                    | 0                   | 0                    |
| <b>seq1074</b> | Firmicutes    | Clostridia   | 0                   | 0                    | 0                   | 0                    |
| <b>seq1143</b> | Firmicutes    | Clostridia   | 0                   | 0                    | 0                   | 0                    |
| <b>seq1421</b> | Firmicutes    | Clostridia   | 0                   | 0                    | 0                   | 0                    |
| <b>seq244</b>  | Firmicutes    | Clostridia   | 0                   | 9                    | 23                  | 22                   |
| <b>seq59</b>   | Firmicutes    | Clostridia   | 0                   | 0                    | 0                   | 0                    |
| <b>seq112</b>  | Firmicutes    | Clostridia   | 0                   | 0                    | 816                 | 853                  |
| <b>seq114</b>  | Firmicutes    | Clostridia   | 104                 | 788                  | 0                   | 0                    |
| <b>seq181</b>  | Firmicutes    | Clostridia   | 0                   | 0                    | 662                 | 800                  |
| <b>seq196</b>  | Firmicutes    | Clostridia   | 357                 | 5080                 | 0                   | 0                    |
| <b>seq199</b>  | Firmicutes    | Clostridia   | 0                   | 0                    | 0                   | 0                    |
| <b>seq227</b>  | Firmicutes    | Clostridia   | 0                   | 0                    | 0                   | 0                    |
| <b>seq232</b>  | Firmicutes    | Clostridia   | 0                   | 0                    | 0                   | 0                    |
| <b>seq281</b>  | Firmicutes    | Clostridia   | 0                   | 0                    | 0                   | 218                  |
| <b>seq308</b>  | Firmicutes    | Clostridia   | 0                   | 0                    | 0                   | 0                    |
| <b>seq309</b>  | Firmicutes    | Clostridia   | 0                   | 0                    | 0                   | 0                    |
| <b>seq338</b>  | Firmicutes    | Clostridia   | 5                   | 18                   | 0                   | 0                    |
| <b>seq382</b>  | Firmicutes    | Clostridia   | 0                   | 0                    | 172                 | 737                  |
| <b>seq385</b>  | Firmicutes    | Clostridia   | 0                   | 0                    | 0                   | 0                    |
| <b>seq387</b>  | Firmicutes    | Clostridia   | 114                 | 1227                 | 0                   | 0                    |
| <b>seq393</b>  | Firmicutes    | Clostridia   | 0                   | 0                    | 0                   | 0                    |
| <b>seq398</b>  | Firmicutes    | Clostridia   | 0                   | 0                    | 0                   | 0                    |
| <b>seq415</b>  | Firmicutes    | Clostridia   | 23                  | 43                   | 0                   | 0                    |
| <b>seq417</b>  | Firmicutes    | Clostridia   | 0                   | 0                    | 0                   | 0                    |
| <b>seq478</b>  | Firmicutes    | Clostridia   | 0                   | 0                    | 0                   | 57                   |
| <b>seq501</b>  | Firmicutes    | Clostridia   | 0                   | 0                    | 0                   | 0                    |
| <b>seq505</b>  | Firmicutes    | Clostridia   | 37                  | 338                  | 0                   | 0                    |
| <b>seq513</b>  | Firmicutes    | Clostridia   | 0                   | 0                    | 0                   | 0                    |
| <b>seq515</b>  | Firmicutes    | Clostridia   | 0                   | 0                    | 0                   | 0                    |

Sequence Count Table

|                | <b>Phylum</b> | <b>Class</b> | <b>Subject17WK0</b> | <b>Subject17WK12</b> | <b>Subject1WK0</b> | <b>Subject1WK12</b> |
|----------------|---------------|--------------|---------------------|----------------------|--------------------|---------------------|
| <b>seq921</b>  | Firmicutes    | Clostridia   | 0                   | 0                    | 0                  | 0                   |
| <b>seq978</b>  | Firmicutes    | Clostridia   | 0                   | 0                    | 0                  | 0                   |
| <b>seq999</b>  | Firmicutes    | Clostridia   | 0                   | 143                  | 0                  | 0                   |
| <b>seq1067</b> | Firmicutes    | Clostridia   | 0                   | 0                    | 0                  | 0                   |
| <b>seq1074</b> | Firmicutes    | Clostridia   | 0                   | 0                    | 0                  | 0                   |
| <b>seq1143</b> | Firmicutes    | Clostridia   | 0                   | 0                    | 0                  | 0                   |
| <b>seq1421</b> | Firmicutes    | Clostridia   | 0                   | 0                    | 0                  | 0                   |
| <b>seq244</b>  | Firmicutes    | Clostridia   | 169                 | 79                   | 43                 | 38                  |
| <b>seq59</b>   | Firmicutes    | Clostridia   | 0                   | 0                    | 2277               | 2994                |
| <b>seq112</b>  | Firmicutes    | Clostridia   | 0                   | 0                    | 0                  | 0                   |
| <b>seq114</b>  | Firmicutes    | Clostridia   | 0                   | 0                    | 0                  | 0                   |
| <b>seq181</b>  | Firmicutes    | Clostridia   | 0                   | 0                    | 0                  | 0                   |
| <b>seq196</b>  | Firmicutes    | Clostridia   | 0                   | 0                    | 0                  | 0                   |
| <b>seq199</b>  | Firmicutes    | Clostridia   | 0                   | 0                    | 0                  | 0                   |
| <b>seq227</b>  | Firmicutes    | Clostridia   | 0                   | 0                    | 0                  | 0                   |
| <b>seq232</b>  | Firmicutes    | Clostridia   | 0                   | 0                    | 0                  | 0                   |
| <b>seq281</b>  | Firmicutes    | Clostridia   | 0                   | 0                    | 0                  | 0                   |
| <b>seq308</b>  | Firmicutes    | Clostridia   | 0                   | 0                    | 0                  | 0                   |
| <b>seq309</b>  | Firmicutes    | Clostridia   | 1273                | 843                  | 0                  | 0                   |
| <b>seq338</b>  | Firmicutes    | Clostridia   | 0                   | 0                    | 33                 | 51                  |
| <b>seq382</b>  | Firmicutes    | Clostridia   | 0                   | 0                    | 14                 | 19                  |
| <b>seq385</b>  | Firmicutes    | Clostridia   | 0                   | 0                    | 0                  | 0                   |
| <b>seq387</b>  | Firmicutes    | Clostridia   | 0                   | 0                    | 0                  | 0                   |
| <b>seq393</b>  | Firmicutes    | Clostridia   | 0                   | 0                    | 0                  | 0                   |
| <b>seq398</b>  | Firmicutes    | Clostridia   | 0                   | 0                    | 0                  | 0                   |
| <b>seq415</b>  | Firmicutes    | Clostridia   | 0                   | 14                   | 11                 | 14                  |
| <b>seq417</b>  | Firmicutes    | Clostridia   | 0                   | 0                    | 0                  | 0                   |
| <b>seq478</b>  | Firmicutes    | Clostridia   | 0                   | 0                    | 0                  | 0                   |
| <b>seq501</b>  | Firmicutes    | Clostridia   | 0                   | 0                    | 0                  | 0                   |
| <b>seq505</b>  | Firmicutes    | Clostridia   | 0                   | 0                    | 0                  | 0                   |
| <b>seq513</b>  | Firmicutes    | Clostridia   | 0                   | 0                    | 0                  | 0                   |
| <b>seq515</b>  | Firmicutes    | Clostridia   | 0                   | 0                    | 0                  | 0                   |

Sequence Count Table

|                | <b>Phylum</b> | <b>Class</b> | <b>Subject2WK0</b> | <b>Subject2WK12</b> | <b>Subject3WK0</b> | <b>Subject3WK12</b> |
|----------------|---------------|--------------|--------------------|---------------------|--------------------|---------------------|
| <b>seq921</b>  | Firmicutes    | Clostridia   | 0                  | 0                   | 0                  | 0                   |
| <b>seq978</b>  | Firmicutes    | Clostridia   | 0                  | 0                   | 0                  | 0                   |
| <b>seq999</b>  | Firmicutes    | Clostridia   | 0                  | 0                   | 0                  | 0                   |
| <b>seq1067</b> | Firmicutes    | Clostridia   | 0                  | 0                   | 0                  | 0                   |
| <b>seq1074</b> | Firmicutes    | Clostridia   | 0                  | 0                   | 0                  | 0                   |
| <b>seq1143</b> | Firmicutes    | Clostridia   | 0                  | 0                   | 0                  | 0                   |
| <b>seq1421</b> | Firmicutes    | Clostridia   | 0                  | 0                   | 0                  | 0                   |
| <b>seq244</b>  | Firmicutes    | Clostridia   | 31                 | 55                  | 64                 | 0                   |
| <b>seq59</b>   | Firmicutes    | Clostridia   | 1649               | 1880                | 0                  | 0                   |
| <b>seq112</b>  | Firmicutes    | Clostridia   | 0                  | 0                   | 0                  | 0                   |
| <b>seq114</b>  | Firmicutes    | Clostridia   | 0                  | 0                   | 583                | 0                   |
| <b>seq181</b>  | Firmicutes    | Clostridia   | 0                  | 0                   | 0                  | 0                   |
| <b>seq196</b>  | Firmicutes    | Clostridia   | 0                  | 0                   | 0                  | 0                   |
| <b>seq199</b>  | Firmicutes    | Clostridia   | 0                  | 0                   | 0                  | 0                   |
| <b>seq227</b>  | Firmicutes    | Clostridia   | 0                  | 0                   | 0                  | 0                   |
| <b>seq232</b>  | Firmicutes    | Clostridia   | 0                  | 0                   | 0                  | 0                   |
| <b>seq281</b>  | Firmicutes    | Clostridia   | 0                  | 0                   | 0                  | 0                   |
| <b>seq308</b>  | Firmicutes    | Clostridia   | 0                  | 0                   | 0                  | 0                   |
| <b>seq309</b>  | Firmicutes    | Clostridia   | 0                  | 0                   | 0                  | 0                   |
| <b>seq338</b>  | Firmicutes    | Clostridia   | 71                 | 122                 | 0                  | 0                   |
| <b>seq382</b>  | Firmicutes    | Clostridia   | 0                  | 0                   | 0                  | 0                   |
| <b>seq385</b>  | Firmicutes    | Clostridia   | 0                  | 0                   | 0                  | 0                   |
| <b>seq387</b>  | Firmicutes    | Clostridia   | 0                  | 0                   | 0                  | 0                   |
| <b>seq393</b>  | Firmicutes    | Clostridia   | 0                  | 0                   | 0                  | 0                   |
| <b>seq398</b>  | Firmicutes    | Clostridia   | 0                  | 0                   | 0                  | 0                   |
| <b>seq415</b>  | Firmicutes    | Clostridia   | 18                 | 25                  | 0                  | 0                   |
| <b>seq417</b>  | Firmicutes    | Clostridia   | 0                  | 0                   | 0                  | 0                   |
| <b>seq478</b>  | Firmicutes    | Clostridia   | 0                  | 0                   | 0                  | 0                   |
| <b>seq501</b>  | Firmicutes    | Clostridia   | 0                  | 0                   | 0                  | 0                   |
| <b>seq505</b>  | Firmicutes    | Clostridia   | 0                  | 0                   | 0                  | 0                   |
| <b>seq513</b>  | Firmicutes    | Clostridia   | 0                  | 0                   | 0                  | 0                   |
| <b>seq515</b>  | Firmicutes    | Clostridia   | 0                  | 0                   | 0                  | 0                   |



Sequence Count Table

|                | <b>Phylum</b> | <b>Class</b> | <b>Subject4WK0</b> | <b>Subject4WK12</b> | <b>Subject5WK0</b> | <b>Subject5WK12</b> |
|----------------|---------------|--------------|--------------------|---------------------|--------------------|---------------------|
| <b>seq921</b>  | Firmicutes    | Clostridia   | 0                  | 0                   | 0                  | 0                   |
| <b>seq978</b>  | Firmicutes    | Clostridia   | 0                  | 0                   | 0                  | 0                   |
| <b>seq999</b>  | Firmicutes    | Clostridia   | 0                  | 0                   | 0                  | 0                   |
| <b>seq1067</b> | Firmicutes    | Clostridia   | 0                  | 0                   | 0                  | 0                   |
| <b>seq1074</b> | Firmicutes    | Clostridia   | 0                  | 0                   | 0                  | 0                   |
| <b>seq1143</b> | Firmicutes    | Clostridia   | 0                  | 0                   | 0                  | 0                   |
| <b>seq1421</b> | Firmicutes    | Clostridia   | 0                  | 0                   | 0                  | 0                   |
| <b>seq244</b>  | Firmicutes    | Clostridia   | 35                 | 71                  | 92                 | 272                 |
| <b>seq59</b>   | Firmicutes    | Clostridia   | 1070               | 2456                | 735                | 1981                |
| <b>seq112</b>  | Firmicutes    | Clostridia   | 0                  | 0                   | 0                  | 0                   |
| <b>seq114</b>  | Firmicutes    | Clostridia   | 0                  | 0                   | 0                  | 0                   |
| <b>seq181</b>  | Firmicutes    | Clostridia   | 0                  | 0                   | 0                  | 0                   |
| <b>seq196</b>  | Firmicutes    | Clostridia   | 0                  | 0                   | 0                  | 0                   |
| <b>seq199</b>  | Firmicutes    | Clostridia   | 0                  | 0                   | 0                  | 0                   |
| <b>seq227</b>  | Firmicutes    | Clostridia   | 0                  | 0                   | 0                  | 0                   |
| <b>seq232</b>  | Firmicutes    | Clostridia   | 0                  | 0                   | 0                  | 0                   |
| <b>seq281</b>  | Firmicutes    | Clostridia   | 0                  | 0                   | 0                  | 0                   |
| <b>seq308</b>  | Firmicutes    | Clostridia   | 0                  | 0                   | 0                  | 0                   |
| <b>seq309</b>  | Firmicutes    | Clostridia   | 0                  | 0                   | 0                  | 0                   |
| <b>seq338</b>  | Firmicutes    | Clostridia   | 0                  | 0                   | 70                 | 59                  |
| <b>seq382</b>  | Firmicutes    | Clostridia   | 70                 | 0                   | 0                  | 0                   |
| <b>seq385</b>  | Firmicutes    | Clostridia   | 0                  | 0                   | 0                  | 0                   |
| <b>seq387</b>  | Firmicutes    | Clostridia   | 0                  | 0                   | 0                  | 0                   |
| <b>seq393</b>  | Firmicutes    | Clostridia   | 0                  | 0                   | 0                  | 0                   |
| <b>seq398</b>  | Firmicutes    | Clostridia   | 0                  | 0                   | 0                  | 0                   |
| <b>seq415</b>  | Firmicutes    | Clostridia   | 7                  | 0                   | 35                 | 34                  |
| <b>seq417</b>  | Firmicutes    | Clostridia   | 0                  | 0                   | 0                  | 0                   |
| <b>seq478</b>  | Firmicutes    | Clostridia   | 0                  | 0                   | 0                  | 0                   |
| <b>seq501</b>  | Firmicutes    | Clostridia   | 0                  | 0                   | 0                  | 0                   |
| <b>seq505</b>  | Firmicutes    | Clostridia   | 0                  | 0                   | 0                  | 0                   |
| <b>seq513</b>  | Firmicutes    | Clostridia   | 0                  | 0                   | 0                  | 0                   |
| <b>seq515</b>  | Firmicutes    | Clostridia   | 0                  | 0                   | 0                  | 0                   |

Sequence Count Table

|                | <b>Phylum</b> | <b>Class</b> | <b>Subject6WK0</b> | <b>Subject6WK12</b> | <b>Subject18WK0</b> | <b>Subject18WK12</b> |
|----------------|---------------|--------------|--------------------|---------------------|---------------------|----------------------|
| <b>seq921</b>  | Firmicutes    | Clostridia   | 0                  | 0                   | 0                   | 0                    |
| <b>seq978</b>  | Firmicutes    | Clostridia   | 0                  | 0                   | 0                   | 0                    |
| <b>seq999</b>  | Firmicutes    | Clostridia   | 0                  | 0                   | 0                   | 0                    |
| <b>seq1067</b> | Firmicutes    | Clostridia   | 0                  | 0                   | 0                   | 0                    |
| <b>seq1074</b> | Firmicutes    | Clostridia   | 0                  | 0                   | 0                   | 0                    |
| <b>seq1143</b> | Firmicutes    | Clostridia   | 0                  | 0                   | 0                   | 0                    |
| <b>seq1421</b> | Firmicutes    | Clostridia   | 0                  | 0                   | 0                   | 0                    |
| <b>seq244</b>  | Firmicutes    | Clostridia   | 14                 | 53                  | 129                 | 17                   |
| <b>seq59</b>   | Firmicutes    | Clostridia   | 0                  | 0                   | 0                   | 0                    |
| <b>seq112</b>  | Firmicutes    | Clostridia   | 0                  | 0                   | 0                   | 0                    |
| <b>seq114</b>  | Firmicutes    | Clostridia   | 1454               | 3027                | 0                   | 0                    |
| <b>seq181</b>  | Firmicutes    | Clostridia   | 0                  | 0                   | 0                   | 0                    |
| <b>seq196</b>  | Firmicutes    | Clostridia   | 0                  | 0                   | 0                   | 0                    |
| <b>seq199</b>  | Firmicutes    | Clostridia   | 0                  | 0                   | 2491                | 0                    |
| <b>seq227</b>  | Firmicutes    | Clostridia   | 0                  | 0                   | 0                   | 0                    |
| <b>seq232</b>  | Firmicutes    | Clostridia   | 0                  | 0                   | 0                   | 0                    |
| <b>seq281</b>  | Firmicutes    | Clostridia   | 182                | 362                 | 0                   | 0                    |
| <b>seq308</b>  | Firmicutes    | Clostridia   | 0                  | 0                   | 0                   | 0                    |
| <b>seq309</b>  | Firmicutes    | Clostridia   | 0                  | 0                   | 0                   | 0                    |
| <b>seq338</b>  | Firmicutes    | Clostridia   | 0                  | 0                   | 0                   | 0                    |
| <b>seq382</b>  | Firmicutes    | Clostridia   | 0                  | 79                  | 0                   | 0                    |
| <b>seq385</b>  | Firmicutes    | Clostridia   | 0                  | 0                   | 0                   | 0                    |
| <b>seq387</b>  | Firmicutes    | Clostridia   | 0                  | 0                   | 0                   | 0                    |
| <b>seq393</b>  | Firmicutes    | Clostridia   | 0                  | 0                   | 0                   | 0                    |
| <b>seq398</b>  | Firmicutes    | Clostridia   | 1253               | 0                   | 0                   | 0                    |
| <b>seq415</b>  | Firmicutes    | Clostridia   | 16                 | 33                  | 40                  | 25                   |
| <b>seq417</b>  | Firmicutes    | Clostridia   | 0                  | 0                   | 0                   | 0                    |
| <b>seq478</b>  | Firmicutes    | Clostridia   | 77                 | 81                  | 0                   | 0                    |
| <b>seq501</b>  | Firmicutes    | Clostridia   | 0                  | 0                   | 0                   | 0                    |
| <b>seq505</b>  | Firmicutes    | Clostridia   | 0                  | 0                   | 0                   | 0                    |
| <b>seq513</b>  | Firmicutes    | Clostridia   | 0                  | 0                   | 0                   | 0                    |
| <b>seq515</b>  | Firmicutes    | Clostridia   | 721                | 14                  | 0                   | 0                    |

Sequence Count Table

|                | <b>Phylum</b> | <b>Class</b> | <b>Subject19WK0</b> | <b>Subject19WK12</b> | <b>Subject20WK0</b> | <b>Subject20WK12</b> |
|----------------|---------------|--------------|---------------------|----------------------|---------------------|----------------------|
| <b>seq921</b>  | Firmicutes    | Clostridia   | 0                   | 0                    | 0                   | 0                    |
| <b>seq978</b>  | Firmicutes    | Clostridia   | 0                   | 0                    | 69                  | 82                   |
| <b>seq999</b>  | Firmicutes    | Clostridia   | 0                   | 0                    | 0                   | 0                    |
| <b>seq1067</b> | Firmicutes    | Clostridia   | 0                   | 0                    | 0                   | 0                    |
| <b>seq1074</b> | Firmicutes    | Clostridia   | 0                   | 0                    | 0                   | 0                    |
| <b>seq1143</b> | Firmicutes    | Clostridia   | 0                   | 0                    | 0                   | 0                    |
| <b>seq1421</b> | Firmicutes    | Clostridia   | 0                   | 0                    | 0                   | 0                    |
| <b>seq244</b>  | Firmicutes    | Clostridia   | 83                  | 203                  | 0                   | 0                    |
| <b>seq59</b>   | Firmicutes    | Clostridia   | 450                 | 1571                 | 0                   | 0                    |
| <b>seq112</b>  | Firmicutes    | Clostridia   | 0                   | 0                    | 1013                | 851                  |
| <b>seq114</b>  | Firmicutes    | Clostridia   | 0                   | 0                    | 149                 | 206                  |
| <b>seq181</b>  | Firmicutes    | Clostridia   | 0                   | 0                    | 0                   | 0                    |
| <b>seq196</b>  | Firmicutes    | Clostridia   | 0                   | 0                    | 0                   | 0                    |
| <b>seq199</b>  | Firmicutes    | Clostridia   | 0                   | 0                    | 0                   | 0                    |
| <b>seq227</b>  | Firmicutes    | Clostridia   | 0                   | 0                    | 617                 | 1111                 |
| <b>seq232</b>  | Firmicutes    | Clostridia   | 0                   | 0                    | 0                   | 0                    |
| <b>seq281</b>  | Firmicutes    | Clostridia   | 0                   | 0                    | 0                   | 0                    |
| <b>seq308</b>  | Firmicutes    | Clostridia   | 0                   | 0                    | 479                 | 45                   |
| <b>seq309</b>  | Firmicutes    | Clostridia   | 0                   | 0                    | 0                   | 0                    |
| <b>seq338</b>  | Firmicutes    | Clostridia   | 0                   | 0                    | 0                   | 0                    |
| <b>seq382</b>  | Firmicutes    | Clostridia   | 0                   | 0                    | 0                   | 0                    |
| <b>seq385</b>  | Firmicutes    | Clostridia   | 0                   | 0                    | 0                   | 0                    |
| <b>seq387</b>  | Firmicutes    | Clostridia   | 0                   | 0                    | 0                   | 0                    |
| <b>seq393</b>  | Firmicutes    | Clostridia   | 0                   | 0                    | 0                   | 0                    |
| <b>seq398</b>  | Firmicutes    | Clostridia   | 0                   | 0                    | 0                   | 0                    |
| <b>seq415</b>  | Firmicutes    | Clostridia   | 26                  | 87                   | 0                   | 0                    |
| <b>seq417</b>  | Firmicutes    | Clostridia   | 0                   | 0                    | 33                  | 289                  |
| <b>seq478</b>  | Firmicutes    | Clostridia   | 0                   | 0                    | 88                  | 46                   |
| <b>seq501</b>  | Firmicutes    | Clostridia   | 0                   | 0                    | 0                   | 0                    |
| <b>seq505</b>  | Firmicutes    | Clostridia   | 0                   | 0                    | 0                   | 0                    |
| <b>seq513</b>  | Firmicutes    | Clostridia   | 0                   | 0                    | 0                   | 0                    |
| <b>seq515</b>  | Firmicutes    | Clostridia   | 0                   | 0                    | 0                   | 0                    |

Sequence Count Table

|                | <b>Phylum</b> | <b>Class</b> | <b>Subject7WK0</b> | <b>Subject7WK12</b> | <b>Subject21WK0</b> | <b>Subject21WK12</b> |
|----------------|---------------|--------------|--------------------|---------------------|---------------------|----------------------|
| <b>seq921</b>  | Firmicutes    | Clostridia   | 0                  | 0                   | 0                   | 0                    |
| <b>seq978</b>  | Firmicutes    | Clostridia   | 0                  | 0                   | 0                   | 0                    |
| <b>seq999</b>  | Firmicutes    | Clostridia   | 0                  | 0                   | 0                   | 0                    |
| <b>seq1067</b> | Firmicutes    | Clostridia   | 0                  | 0                   | 0                   | 0                    |
| <b>seq1074</b> | Firmicutes    | Clostridia   | 0                  | 0                   | 0                   | 0                    |
| <b>seq1143</b> | Firmicutes    | Clostridia   | 0                  | 0                   | 0                   | 0                    |
| <b>seq1421</b> | Firmicutes    | Clostridia   | 0                  | 0                   | 0                   | 0                    |
| <b>seq244</b>  | Firmicutes    | Clostridia   | 141                | 43                  | 11                  | 34                   |
| <b>seq59</b>   | Firmicutes    | Clostridia   | 828                | 1851                | 0                   | 0                    |
| <b>seq112</b>  | Firmicutes    | Clostridia   | 0                  | 0                   | 0                   | 0                    |
| <b>seq114</b>  | Firmicutes    | Clostridia   | 0                  | 0                   | 0                   | 0                    |
| <b>seq181</b>  | Firmicutes    | Clostridia   | 0                  | 0                   | 0                   | 0                    |
| <b>seq196</b>  | Firmicutes    | Clostridia   | 0                  | 0                   | 0                   | 0                    |
| <b>seq199</b>  | Firmicutes    | Clostridia   | 0                  | 0                   | 876                 | 1593                 |
| <b>seq227</b>  | Firmicutes    | Clostridia   | 0                  | 0                   | 0                   | 0                    |
| <b>seq232</b>  | Firmicutes    | Clostridia   | 15                 | 2387                | 0                   | 0                    |
| <b>seq281</b>  | Firmicutes    | Clostridia   | 0                  | 0                   | 0                   | 0                    |
| <b>seq308</b>  | Firmicutes    | Clostridia   | 0                  | 0                   | 0                   | 0                    |
| <b>seq309</b>  | Firmicutes    | Clostridia   | 0                  | 0                   | 0                   | 0                    |
| <b>seq338</b>  | Firmicutes    | Clostridia   | 80                 | 92                  | 0                   | 0                    |
| <b>seq382</b>  | Firmicutes    | Clostridia   | 0                  | 0                   | 0                   | 0                    |
| <b>seq385</b>  | Firmicutes    | Clostridia   | 0                  | 8                   | 0                   | 0                    |
| <b>seq387</b>  | Firmicutes    | Clostridia   | 0                  | 0                   | 0                   | 0                    |
| <b>seq393</b>  | Firmicutes    | Clostridia   | 0                  | 0                   | 0                   | 0                    |
| <b>seq398</b>  | Firmicutes    | Clostridia   | 0                  | 0                   | 0                   | 0                    |
| <b>seq415</b>  | Firmicutes    | Clostridia   | 24                 | 87                  | 38                  | 108                  |
| <b>seq417</b>  | Firmicutes    | Clostridia   | 0                  | 0                   | 0                   | 0                    |
| <b>seq478</b>  | Firmicutes    | Clostridia   | 0                  | 0                   | 0                   | 0                    |
| <b>seq501</b>  | Firmicutes    | Clostridia   | 0                  | 0                   | 0                   | 0                    |
| <b>seq505</b>  | Firmicutes    | Clostridia   | 0                  | 0                   | 0                   | 0                    |
| <b>seq513</b>  | Firmicutes    | Clostridia   | 0                  | 0                   | 0                   | 0                    |
| <b>seq515</b>  | Firmicutes    | Clostridia   | 0                  | 0                   | 0                   | 0                    |

Sequence Count Table

|                | <b>Phylum</b> | <b>Class</b> | <b>Subject8WK0</b> | <b>Subject8WK12</b> | <b>Subject9WK0</b> | <b>Subject9WK12</b> |
|----------------|---------------|--------------|--------------------|---------------------|--------------------|---------------------|
| <b>seq921</b>  | Firmicutes    | Clostridia   | 0                  | 0                   | 0                  | 0                   |
| <b>seq978</b>  | Firmicutes    | Clostridia   | 0                  | 0                   | 0                  | 0                   |
| <b>seq999</b>  | Firmicutes    | Clostridia   | 0                  | 0                   | 0                  | 0                   |
| <b>seq1067</b> | Firmicutes    | Clostridia   | 0                  | 0                   | 0                  | 0                   |
| <b>seq1074</b> | Firmicutes    | Clostridia   | 0                  | 0                   | 0                  | 0                   |
| <b>seq1143</b> | Firmicutes    | Clostridia   | 0                  | 0                   | 0                  | 0                   |
| <b>seq1421</b> | Firmicutes    | Clostridia   | 0                  | 0                   | 0                  | 0                   |
| <b>seq244</b>  | Firmicutes    | Clostridia   | 75                 | 78                  | 31                 | 0                   |
| <b>seq59</b>   | Firmicutes    | Clostridia   | 474                | 0                   | 144                | 5                   |
| <b>seq112</b>  | Firmicutes    | Clostridia   | 0                  | 0                   | 0                  | 0                   |
| <b>seq114</b>  | Firmicutes    | Clostridia   | 0                  | 0                   | 0                  | 0                   |
| <b>seq181</b>  | Firmicutes    | Clostridia   | 0                  | 0                   | 0                  | 0                   |
| <b>seq196</b>  | Firmicutes    | Clostridia   | 0                  | 0                   | 0                  | 0                   |
| <b>seq199</b>  | Firmicutes    | Clostridia   | 0                  | 0                   | 0                  | 0                   |
| <b>seq227</b>  | Firmicutes    | Clostridia   | 0                  | 2276                | 0                  | 0                   |
| <b>seq232</b>  | Firmicutes    | Clostridia   | 0                  | 0                   | 0                  | 0                   |
| <b>seq281</b>  | Firmicutes    | Clostridia   | 0                  | 0                   | 0                  | 0                   |
| <b>seq308</b>  | Firmicutes    | Clostridia   | 0                  | 0                   | 0                  | 0                   |
| <b>seq309</b>  | Firmicutes    | Clostridia   | 0                  | 0                   | 0                  | 0                   |
| <b>seq338</b>  | Firmicutes    | Clostridia   | 96                 | 127                 | 41                 | 0                   |
| <b>seq382</b>  | Firmicutes    | Clostridia   | 0                  | 0                   | 0                  | 0                   |
| <b>seq385</b>  | Firmicutes    | Clostridia   | 0                  | 0                   | 12                 | 0                   |
| <b>seq387</b>  | Firmicutes    | Clostridia   | 0                  | 0                   | 0                  | 0                   |
| <b>seq393</b>  | Firmicutes    | Clostridia   | 0                  | 0                   | 0                  | 0                   |
| <b>seq398</b>  | Firmicutes    | Clostridia   | 0                  | 0                   | 0                  | 0                   |
| <b>seq415</b>  | Firmicutes    | Clostridia   | 38                 | 23                  | 34                 | 15                  |
| <b>seq417</b>  | Firmicutes    | Clostridia   | 0                  | 0                   | 0                  | 0                   |
| <b>seq478</b>  | Firmicutes    | Clostridia   | 0                  | 0                   | 0                  | 0                   |
| <b>seq501</b>  | Firmicutes    | Clostridia   | 0                  | 0                   | 772                | 17                  |
| <b>seq505</b>  | Firmicutes    | Clostridia   | 0                  | 0                   | 0                  | 0                   |
| <b>seq513</b>  | Firmicutes    | Clostridia   | 0                  | 0                   | 0                  | 0                   |
| <b>seq515</b>  | Firmicutes    | Clostridia   | 0                  | 0                   | 0                  | 0                   |

Sequence Count Table

|                | <b>Phylum</b> | <b>Class</b> | <b>Subject10WK0</b> | <b>Subject10WK12</b> | <b>Subject22WK0</b> | <b>Subject22WK12</b> |
|----------------|---------------|--------------|---------------------|----------------------|---------------------|----------------------|
| <b>seq921</b>  | Firmicutes    | Clostridia   | 0                   | 0                    | 0                   | 0                    |
| <b>seq978</b>  | Firmicutes    | Clostridia   | 0                   | 0                    | 0                   | 0                    |
| <b>seq999</b>  | Firmicutes    | Clostridia   | 0                   | 0                    | 0                   | 0                    |
| <b>seq1067</b> | Firmicutes    | Clostridia   | 0                   | 0                    | 0                   | 0                    |
| <b>seq1074</b> | Firmicutes    | Clostridia   | 0                   | 0                    | 0                   | 0                    |
| <b>seq1143</b> | Firmicutes    | Clostridia   | 0                   | 0                    | 0                   | 0                    |
| <b>seq1421</b> | Firmicutes    | Clostridia   | 0                   | 0                    | 0                   | 0                    |
| <b>seq244</b>  | Firmicutes    | Clostridia   | 58                  | 36                   | 21                  | 9                    |
| <b>seq59</b>   | Firmicutes    | Clostridia   | 905                 | 274                  | 0                   | 0                    |
| <b>seq112</b>  | Firmicutes    | Clostridia   | 0                   | 0                    | 500                 | 531                  |
| <b>seq114</b>  | Firmicutes    | Clostridia   | 0                   | 0                    | 0                   | 0                    |
| <b>seq181</b>  | Firmicutes    | Clostridia   | 0                   | 0                    | 331                 | 170                  |
| <b>seq196</b>  | Firmicutes    | Clostridia   | 0                   | 0                    | 0                   | 0                    |
| <b>seq199</b>  | Firmicutes    | Clostridia   | 0                   | 0                    | 232                 | 102                  |
| <b>seq227</b>  | Firmicutes    | Clostridia   | 0                   | 0                    | 0                   | 0                    |
| <b>seq232</b>  | Firmicutes    | Clostridia   | 0                   | 0                    | 0                   | 0                    |
| <b>seq281</b>  | Firmicutes    | Clostridia   | 0                   | 0                    | 803                 | 742                  |
| <b>seq308</b>  | Firmicutes    | Clostridia   | 0                   | 0                    | 909                 | 689                  |
| <b>seq309</b>  | Firmicutes    | Clostridia   | 0                   | 0                    | 0                   | 0                    |
| <b>seq338</b>  | Firmicutes    | Clostridia   | 124                 | 47                   | 0                   | 0                    |
| <b>seq382</b>  | Firmicutes    | Clostridia   | 0                   | 0                    | 0                   | 0                    |
| <b>seq385</b>  | Firmicutes    | Clostridia   | 0                   | 0                    | 128                 | 816                  |
| <b>seq387</b>  | Firmicutes    | Clostridia   | 0                   | 0                    | 0                   | 0                    |
| <b>seq393</b>  | Firmicutes    | Clostridia   | 0                   | 0                    | 0                   | 0                    |
| <b>seq398</b>  | Firmicutes    | Clostridia   | 0                   | 0                    | 0                   | 0                    |
| <b>seq415</b>  | Firmicutes    | Clostridia   | 40                  | 23                   | 0                   | 0                    |
| <b>seq417</b>  | Firmicutes    | Clostridia   | 0                   | 0                    | 231                 | 345                  |
| <b>seq478</b>  | Firmicutes    | Clostridia   | 0                   | 0                    | 75                  | 69                   |
| <b>seq501</b>  | Firmicutes    | Clostridia   | 0                   | 0                    | 0                   | 0                    |
| <b>seq505</b>  | Firmicutes    | Clostridia   | 0                   | 0                    | 0                   | 0                    |
| <b>seq513</b>  | Firmicutes    | Clostridia   | 0                   | 0                    | 0                   | 738                  |
| <b>seq515</b>  | Firmicutes    | Clostridia   | 0                   | 0                    | 0                   | 0                    |

Sequence Count Table

|                | <b>Phylum</b> | <b>Class</b> | <b>Subject23WK0</b> | <b>Subject23WK12</b> | <b>Subject24WK0</b> | <b>Subject24WK12</b> |
|----------------|---------------|--------------|---------------------|----------------------|---------------------|----------------------|
| <b>seq921</b>  | Firmicutes    | Clostridia   | 0                   | 0                    | 0                   | 0                    |
| <b>seq978</b>  | Firmicutes    | Clostridia   | 0                   | 0                    | 0                   | 0                    |
| <b>seq999</b>  | Firmicutes    | Clostridia   | 0                   | 0                    | 0                   | 0                    |
| <b>seq1067</b> | Firmicutes    | Clostridia   | 0                   | 116                  | 0                   | 0                    |
| <b>seq1074</b> | Firmicutes    | Clostridia   | 0                   | 114                  | 0                   | 0                    |
| <b>seq1143</b> | Firmicutes    | Clostridia   | 0                   | 94                   | 0                   | 0                    |
| <b>seq1421</b> | Firmicutes    | Clostridia   | 0                   | 0                    | 0                   | 0                    |
| <b>seq244</b>  | Firmicutes    | Clostridia   | 15                  | 29                   | 12                  | 18                   |
| <b>seq59</b>   | Firmicutes    | Clostridia   | 0                   | 0                    | 0                   | 0                    |
| <b>seq112</b>  | Firmicutes    | Clostridia   | 0                   | 0                    | 1834                | 2077                 |
| <b>seq114</b>  | Firmicutes    | Clostridia   | 0                   | 0                    | 0                   | 0                    |
| <b>seq181</b>  | Firmicutes    | Clostridia   | 1053                | 1343                 | 0                   | 0                    |
| <b>seq196</b>  | Firmicutes    | Clostridia   | 0                   | 0                    | 0                   | 0                    |
| <b>seq199</b>  | Firmicutes    | Clostridia   | 0                   | 0                    | 0                   | 0                    |
| <b>seq227</b>  | Firmicutes    | Clostridia   | 0                   | 0                    | 0                   | 0                    |
| <b>seq232</b>  | Firmicutes    | Clostridia   | 0                   | 0                    | 0                   | 0                    |
| <b>seq281</b>  | Firmicutes    | Clostridia   | 31                  | 208                  | 0                   | 0                    |
| <b>seq308</b>  | Firmicutes    | Clostridia   | 0                   | 0                    | 0                   | 0                    |
| <b>seq309</b>  | Firmicutes    | Clostridia   | 0                   | 0                    | 0                   | 0                    |
| <b>seq338</b>  | Firmicutes    | Clostridia   | 29                  | 88                   | 75                  | 81                   |
| <b>seq382</b>  | Firmicutes    | Clostridia   | 3                   | 44                   | 0                   | 68                   |
| <b>seq385</b>  | Firmicutes    | Clostridia   | 0                   | 0                    | 0                   | 0                    |
| <b>seq387</b>  | Firmicutes    | Clostridia   | 0                   | 0                    | 0                   | 0                    |
| <b>seq393</b>  | Firmicutes    | Clostridia   | 0                   | 0                    | 0                   | 0                    |
| <b>seq398</b>  | Firmicutes    | Clostridia   | 0                   | 0                    | 0                   | 0                    |
| <b>seq415</b>  | Firmicutes    | Clostridia   | 0                   | 0                    | 32                  | 25                   |
| <b>seq417</b>  | Firmicutes    | Clostridia   | 0                   | 257                  | 0                   | 0                    |
| <b>seq478</b>  | Firmicutes    | Clostridia   | 0                   | 49                   | 0                   | 0                    |
| <b>seq501</b>  | Firmicutes    | Clostridia   | 0                   | 0                    | 0                   | 0                    |
| <b>seq505</b>  | Firmicutes    | Clostridia   | 0                   | 0                    | 0                   | 0                    |
| <b>seq513</b>  | Firmicutes    | Clostridia   | 0                   | 0                    | 0                   | 0                    |
| <b>seq515</b>  | Firmicutes    | Clostridia   | 0                   | 0                    | 0                   | 0                    |

Sequence Count Table

|                | <b>Phylum</b> | <b>Class</b> | <b>Subject11WK0</b> | <b>Subject11WK12</b> | <b>Subject12WK0</b> | <b>Subject12WK12</b> |
|----------------|---------------|--------------|---------------------|----------------------|---------------------|----------------------|
| <b>seq921</b>  | Firmicutes    | Clostridia   | 0                   | 0                    | 0                   | 0                    |
| <b>seq978</b>  | Firmicutes    | Clostridia   | 0                   | 0                    | 0                   | 0                    |
| <b>seq999</b>  | Firmicutes    | Clostridia   | 0                   | 0                    | 0                   | 0                    |
| <b>seq1067</b> | Firmicutes    | Clostridia   | 0                   | 0                    | 0                   | 0                    |
| <b>seq1074</b> | Firmicutes    | Clostridia   | 0                   | 0                    | 0                   | 0                    |
| <b>seq1143</b> | Firmicutes    | Clostridia   | 0                   | 0                    | 0                   | 0                    |
| <b>seq1421</b> | Firmicutes    | Clostridia   | 0                   | 0                    | 0                   | 0                    |
| <b>seq244</b>  | Firmicutes    | Clostridia   | 75                  | 0                    | 9                   | 17                   |
| <b>seq59</b>   | Firmicutes    | Clostridia   | 946                 | 38                   | 0                   | 0                    |
| <b>seq112</b>  | Firmicutes    | Clostridia   | 0                   | 0                    | 0                   | 0                    |
| <b>seq114</b>  | Firmicutes    | Clostridia   | 0                   | 0                    | 38                  | 1237                 |
| <b>seq181</b>  | Firmicutes    | Clostridia   | 0                   | 0                    | 754                 | 69                   |
| <b>seq196</b>  | Firmicutes    | Clostridia   | 0                   | 0                    | 0                   | 0                    |
| <b>seq199</b>  | Firmicutes    | Clostridia   | 0                   | 0                    | 0                   | 0                    |
| <b>seq227</b>  | Firmicutes    | Clostridia   | 0                   | 0                    | 0                   | 0                    |
| <b>seq232</b>  | Firmicutes    | Clostridia   | 0                   | 0                    | 0                   | 0                    |
| <b>seq281</b>  | Firmicutes    | Clostridia   | 0                   | 0                    | 0                   | 0                    |
| <b>seq308</b>  | Firmicutes    | Clostridia   | 0                   | 0                    | 0                   | 0                    |
| <b>seq309</b>  | Firmicutes    | Clostridia   | 0                   | 0                    | 0                   | 0                    |
| <b>seq338</b>  | Firmicutes    | Clostridia   | 0                   | 0                    | 29                  | 68                   |
| <b>seq382</b>  | Firmicutes    | Clostridia   | 0                   | 0                    | 35                  | 98                   |
| <b>seq385</b>  | Firmicutes    | Clostridia   | 0                   | 0                    | 0                   | 0                    |
| <b>seq387</b>  | Firmicutes    | Clostridia   | 0                   | 0                    | 0                   | 0                    |
| <b>seq393</b>  | Firmicutes    | Clostridia   | 0                   | 0                    | 0                   | 0                    |
| <b>seq398</b>  | Firmicutes    | Clostridia   | 0                   | 0                    | 0                   | 0                    |
| <b>seq415</b>  | Firmicutes    | Clostridia   | 83                  | 19                   | 0                   | 18                   |
| <b>seq417</b>  | Firmicutes    | Clostridia   | 0                   | 0                    | 0                   | 0                    |
| <b>seq478</b>  | Firmicutes    | Clostridia   | 0                   | 0                    | 0                   | 0                    |
| <b>seq501</b>  | Firmicutes    | Clostridia   | 0                   | 0                    | 0                   | 0                    |
| <b>seq505</b>  | Firmicutes    | Clostridia   | 0                   | 0                    | 0                   | 0                    |
| <b>seq513</b>  | Firmicutes    | Clostridia   | 0                   | 0                    | 0                   | 0                    |
| <b>seq515</b>  | Firmicutes    | Clostridia   | 0                   | 0                    | 0                   | 0                    |



Sequence Count Table

|                | <b>Phylum</b> | <b>Class</b> | <b>Subject25WK0</b> | <b>Subject25WK12</b> | <b>Subject38WK0</b> | <b>Subject38WK12</b> |
|----------------|---------------|--------------|---------------------|----------------------|---------------------|----------------------|
| <b>seq921</b>  | Firmicutes    | Clostridia   | 0                   | 0                    | 0                   | 0                    |
| <b>seq978</b>  | Firmicutes    | Clostridia   | 0                   | 0                    | 0                   | 0                    |
| <b>seq999</b>  | Firmicutes    | Clostridia   | 0                   | 0                    | 0                   | 0                    |
| <b>seq1067</b> | Firmicutes    | Clostridia   | 0                   | 0                    | 0                   | 0                    |
| <b>seq1074</b> | Firmicutes    | Clostridia   | 0                   | 0                    | 0                   | 0                    |
| <b>seq1143</b> | Firmicutes    | Clostridia   | 0                   | 0                    | 0                   | 0                    |
| <b>seq1421</b> | Firmicutes    | Clostridia   | 0                   | 0                    | 0                   | 0                    |
| <b>seq244</b>  | Firmicutes    | Clostridia   | 28                  | 34                   | 0                   | 0                    |
| <b>seq59</b>   | Firmicutes    | Clostridia   | 0                   | 0                    | 0                   | 0                    |
| <b>seq112</b>  | Firmicutes    | Clostridia   | 0                   | 0                    | 0                   | 0                    |
| <b>seq114</b>  | Firmicutes    | Clostridia   | 3664                | 652                  | 0                   | 0                    |
| <b>seq181</b>  | Firmicutes    | Clostridia   | 0                   | 0                    | 0                   | 0                    |
| <b>seq196</b>  | Firmicutes    | Clostridia   | 0                   | 0                    | 0                   | 0                    |
| <b>seq199</b>  | Firmicutes    | Clostridia   | 0                   | 0                    | 0                   | 0                    |
| <b>seq227</b>  | Firmicutes    | Clostridia   | 0                   | 0                    | 0                   | 0                    |
| <b>seq232</b>  | Firmicutes    | Clostridia   | 0                   | 1381                 | 0                   | 0                    |
| <b>seq281</b>  | Firmicutes    | Clostridia   | 0                   | 0                    | 0                   | 0                    |
| <b>seq308</b>  | Firmicutes    | Clostridia   | 0                   | 0                    | 0                   | 0                    |
| <b>seq309</b>  | Firmicutes    | Clostridia   | 0                   | 0                    | 0                   | 0                    |
| <b>seq338</b>  | Firmicutes    | Clostridia   | 21                  | 0                    | 0                   | 0                    |
| <b>seq382</b>  | Firmicutes    | Clostridia   | 0                   | 0                    | 0                   | 0                    |
| <b>seq385</b>  | Firmicutes    | Clostridia   | 51                  | 0                    | 0                   | 0                    |
| <b>seq387</b>  | Firmicutes    | Clostridia   | 0                   | 0                    | 0                   | 0                    |
| <b>seq393</b>  | Firmicutes    | Clostridia   | 0                   | 0                    | 0                   | 0                    |
| <b>seq398</b>  | Firmicutes    | Clostridia   | 0                   | 0                    | 0                   | 0                    |
| <b>seq415</b>  | Firmicutes    | Clostridia   | 0                   | 4                    | 0                   | 0                    |
| <b>seq417</b>  | Firmicutes    | Clostridia   | 0                   | 0                    | 0                   | 0                    |
| <b>seq478</b>  | Firmicutes    | Clostridia   | 52                  | 29                   | 0                   | 0                    |
| <b>seq501</b>  | Firmicutes    | Clostridia   | 0                   | 0                    | 0                   | 0                    |
| <b>seq505</b>  | Firmicutes    | Clostridia   | 0                   | 0                    | 0                   | 0                    |
| <b>seq513</b>  | Firmicutes    | Clostridia   | 0                   | 0                    | 0                   | 0                    |
| <b>seq515</b>  | Firmicutes    | Clostridia   | 0                   | 0                    | 0                   | 0                    |

Sequence Count Table

|                | <b>Phylum</b> | <b>Class</b> | <b>Subject31WK0</b> | <b>Subject31WK12</b> | <b>Subject32WK0</b> | <b>Subject32WK12</b> |
|----------------|---------------|--------------|---------------------|----------------------|---------------------|----------------------|
| <b>seq921</b>  | Firmicutes    | Clostridia   | 0                   | 0                    | 0                   | 0                    |
| <b>seq978</b>  | Firmicutes    | Clostridia   | 0                   | 0                    | 0                   | 0                    |
| <b>seq999</b>  | Firmicutes    | Clostridia   | 0                   | 0                    | 0                   | 0                    |
| <b>seq1067</b> | Firmicutes    | Clostridia   | 0                   | 0                    | 0                   | 0                    |
| <b>seq1074</b> | Firmicutes    | Clostridia   | 0                   | 0                    | 0                   | 0                    |
| <b>seq1143</b> | Firmicutes    | Clostridia   | 0                   | 0                    | 0                   | 0                    |
| <b>seq1421</b> | Firmicutes    | Clostridia   | 0                   | 0                    | 0                   | 0                    |
| <b>seq244</b>  | Firmicutes    | Clostridia   | 0                   | 0                    | 29                  | 0                    |
| <b>seq59</b>   | Firmicutes    | Clostridia   | 0                   | 0                    | 0                   | 0                    |
| <b>seq112</b>  | Firmicutes    | Clostridia   | 0                   | 0                    | 0                   | 0                    |
| <b>seq114</b>  | Firmicutes    | Clostridia   | 0                   | 0                    | 0                   | 0                    |
| <b>seq181</b>  | Firmicutes    | Clostridia   | 0                   | 0                    | 0                   | 0                    |
| <b>seq196</b>  | Firmicutes    | Clostridia   | 0                   | 0                    | 0                   | 0                    |
| <b>seq199</b>  | Firmicutes    | Clostridia   | 0                   | 0                    | 0                   | 0                    |
| <b>seq227</b>  | Firmicutes    | Clostridia   | 0                   | 0                    | 0                   | 0                    |
| <b>seq232</b>  | Firmicutes    | Clostridia   | 0                   | 0                    | 0                   | 0                    |
| <b>seq281</b>  | Firmicutes    | Clostridia   | 0                   | 0                    | 0                   | 0                    |
| <b>seq308</b>  | Firmicutes    | Clostridia   | 0                   | 0                    | 0                   | 0                    |
| <b>seq309</b>  | Firmicutes    | Clostridia   | 0                   | 0                    | 0                   | 0                    |
| <b>seq338</b>  | Firmicutes    | Clostridia   | 0                   | 0                    | 0                   | 0                    |
| <b>seq382</b>  | Firmicutes    | Clostridia   | 0                   | 0                    | 0                   | 0                    |
| <b>seq385</b>  | Firmicutes    | Clostridia   | 0                   | 0                    | 0                   | 0                    |
| <b>seq387</b>  | Firmicutes    | Clostridia   | 0                   | 0                    | 0                   | 0                    |
| <b>seq393</b>  | Firmicutes    | Clostridia   | 0                   | 0                    | 0                   | 0                    |
| <b>seq398</b>  | Firmicutes    | Clostridia   | 0                   | 0                    | 0                   | 0                    |
| <b>seq415</b>  | Firmicutes    | Clostridia   | 0                   | 0                    | 0                   | 0                    |
| <b>seq417</b>  | Firmicutes    | Clostridia   | 0                   | 0                    | 0                   | 0                    |
| <b>seq478</b>  | Firmicutes    | Clostridia   | 0                   | 0                    | 0                   | 0                    |
| <b>seq501</b>  | Firmicutes    | Clostridia   | 0                   | 0                    | 0                   | 0                    |
| <b>seq505</b>  | Firmicutes    | Clostridia   | 0                   | 0                    | 391                 | 7                    |
| <b>seq513</b>  | Firmicutes    | Clostridia   | 0                   | 0                    | 0                   | 0                    |
| <b>seq515</b>  | Firmicutes    | Clostridia   | 0                   | 0                    | 0                   | 0                    |

Sequence Count Table

|                | <b>Phylum</b> | <b>Class</b> | <b>Subject13WK0</b> | <b>Subject13WK12</b> | <b>Subject39WK0</b> | <b>Subject39WK12</b> |
|----------------|---------------|--------------|---------------------|----------------------|---------------------|----------------------|
| <b>seq921</b>  | Firmicutes    | Clostridia   | 0                   | 0                    | 0                   | 0                    |
| <b>seq978</b>  | Firmicutes    | Clostridia   | 0                   | 0                    | 0                   | 0                    |
| <b>seq999</b>  | Firmicutes    | Clostridia   | 0                   | 0                    | 0                   | 0                    |
| <b>seq1067</b> | Firmicutes    | Clostridia   | 0                   | 0                    | 0                   | 0                    |
| <b>seq1074</b> | Firmicutes    | Clostridia   | 0                   | 0                    | 0                   | 0                    |
| <b>seq1143</b> | Firmicutes    | Clostridia   | 0                   | 0                    | 0                   | 0                    |
| <b>seq1421</b> | Firmicutes    | Clostridia   | 0                   | 0                    | 0                   | 0                    |
| <b>seq244</b>  | Firmicutes    | Clostridia   | 18                  | 7                    | 0                   | 16                   |
| <b>seq59</b>   | Firmicutes    | Clostridia   | 793                 | 1077                 | 0                   | 0                    |
| <b>seq112</b>  | Firmicutes    | Clostridia   | 0                   | 104                  | 0                   | 1470                 |
| <b>seq114</b>  | Firmicutes    | Clostridia   | 0                   | 0                    | 0                   | 0                    |
| <b>seq181</b>  | Firmicutes    | Clostridia   | 0                   | 0                    | 0                   | 0                    |
| <b>seq196</b>  | Firmicutes    | Clostridia   | 0                   | 0                    | 0                   | 0                    |
| <b>seq199</b>  | Firmicutes    | Clostridia   | 0                   | 0                    | 0                   | 0                    |
| <b>seq227</b>  | Firmicutes    | Clostridia   | 0                   | 0                    | 0                   | 0                    |
| <b>seq232</b>  | Firmicutes    | Clostridia   | 0                   | 0                    | 0                   | 0                    |
| <b>seq281</b>  | Firmicutes    | Clostridia   | 0                   | 0                    | 0                   | 0                    |
| <b>seq308</b>  | Firmicutes    | Clostridia   | 0                   | 0                    | 0                   | 0                    |
| <b>seq309</b>  | Firmicutes    | Clostridia   | 0                   | 0                    | 0                   | 0                    |
| <b>seq338</b>  | Firmicutes    | Clostridia   | 53                  | 27                   | 0                   | 0                    |
| <b>seq382</b>  | Firmicutes    | Clostridia   | 0                   | 0                    | 0                   | 0                    |
| <b>seq385</b>  | Firmicutes    | Clostridia   | 74                  | 257                  | 0                   | 0                    |
| <b>seq387</b>  | Firmicutes    | Clostridia   | 0                   | 0                    | 0                   | 0                    |
| <b>seq393</b>  | Firmicutes    | Clostridia   | 0                   | 0                    | 0                   | 0                    |
| <b>seq398</b>  | Firmicutes    | Clostridia   | 0                   | 0                    | 0                   | 0                    |
| <b>seq415</b>  | Firmicutes    | Clostridia   | 0                   | 16                   | 0                   | 0                    |
| <b>seq417</b>  | Firmicutes    | Clostridia   | 0                   | 0                    | 0                   | 0                    |
| <b>seq478</b>  | Firmicutes    | Clostridia   | 68                  | 141                  | 0                   | 0                    |
| <b>seq501</b>  | Firmicutes    | Clostridia   | 0                   | 0                    | 0                   | 0                    |
| <b>seq505</b>  | Firmicutes    | Clostridia   | 0                   | 0                    | 0                   | 0                    |
| <b>seq513</b>  | Firmicutes    | Clostridia   | 0                   | 0                    | 0                   | 0                    |
| <b>seq515</b>  | Firmicutes    | Clostridia   | 0                   | 0                    | 0                   | 0                    |

Sequence Count Table

|                | <b>Phylum</b> | <b>Class</b> | <b>Subject26WK0</b> | <b>Subject26WK12</b> | <b>Subject14WK0</b> | <b>Subject14WK12</b> |
|----------------|---------------|--------------|---------------------|----------------------|---------------------|----------------------|
| <b>seq921</b>  | Firmicutes    | Clostridia   | 0                   | 0                    | 0                   | 0                    |
| <b>seq978</b>  | Firmicutes    | Clostridia   | 0                   | 0                    | 0                   | 0                    |
| <b>seq999</b>  | Firmicutes    | Clostridia   | 0                   | 0                    | 0                   | 0                    |
| <b>seq1067</b> | Firmicutes    | Clostridia   | 0                   | 0                    | 0                   | 0                    |
| <b>seq1074</b> | Firmicutes    | Clostridia   | 0                   | 0                    | 0                   | 0                    |
| <b>seq1143</b> | Firmicutes    | Clostridia   | 0                   | 0                    | 0                   | 0                    |
| <b>seq1421</b> | Firmicutes    | Clostridia   | 0                   | 0                    | 0                   | 0                    |
| <b>seq244</b>  | Firmicutes    | Clostridia   | 112                 | 942                  | 14                  | 43                   |
| <b>seq59</b>   | Firmicutes    | Clostridia   | 2549                | 414                  | 0                   | 0                    |
| <b>seq112</b>  | Firmicutes    | Clostridia   | 0                   | 0                    | 1660                | 0                    |
| <b>seq114</b>  | Firmicutes    | Clostridia   | 0                   | 0                    | 0                   | 0                    |
| <b>seq181</b>  | Firmicutes    | Clostridia   | 0                   | 0                    | 0                   | 0                    |
| <b>seq196</b>  | Firmicutes    | Clostridia   | 0                   | 0                    | 0                   | 0                    |
| <b>seq199</b>  | Firmicutes    | Clostridia   | 0                   | 0                    | 32                  | 0                    |
| <b>seq227</b>  | Firmicutes    | Clostridia   | 0                   | 0                    | 0                   | 0                    |
| <b>seq232</b>  | Firmicutes    | Clostridia   | 0                   | 0                    | 0                   | 0                    |
| <b>seq281</b>  | Firmicutes    | Clostridia   | 0                   | 0                    | 0                   | 0                    |
| <b>seq308</b>  | Firmicutes    | Clostridia   | 0                   | 0                    | 0                   | 0                    |
| <b>seq309</b>  | Firmicutes    | Clostridia   | 0                   | 0                    | 0                   | 0                    |
| <b>seq338</b>  | Firmicutes    | Clostridia   | 0                   | 0                    | 42                  | 49                   |
| <b>seq382</b>  | Firmicutes    | Clostridia   | 0                   | 0                    | 0                   | 23                   |
| <b>seq385</b>  | Firmicutes    | Clostridia   | 0                   | 0                    | 0                   | 0                    |
| <b>seq387</b>  | Firmicutes    | Clostridia   | 0                   | 0                    | 0                   | 0                    |
| <b>seq393</b>  | Firmicutes    | Clostridia   | 0                   | 0                    | 0                   | 1302                 |
| <b>seq398</b>  | Firmicutes    | Clostridia   | 0                   | 0                    | 0                   | 0                    |
| <b>seq415</b>  | Firmicutes    | Clostridia   | 31                  | 17                   | 0                   | 0                    |
| <b>seq417</b>  | Firmicutes    | Clostridia   | 0                   | 0                    | 0                   | 0                    |
| <b>seq478</b>  | Firmicutes    | Clostridia   | 0                   | 0                    | 0                   | 0                    |
| <b>seq501</b>  | Firmicutes    | Clostridia   | 0                   | 0                    | 0                   | 0                    |
| <b>seq505</b>  | Firmicutes    | Clostridia   | 0                   | 0                    | 0                   | 0                    |
| <b>seq513</b>  | Firmicutes    | Clostridia   | 0                   | 0                    | 0                   | 0                    |
| <b>seq515</b>  | Firmicutes    | Clostridia   | 0                   | 0                    | 0                   | 0                    |

Sequence Count Table

|                | <b>Phylum</b> | <b>Class</b> | <b>Subject27WK0</b> | <b>Subject27WK12</b> | <b>Subject15WK0</b> | <b>Subject15WK12</b> |
|----------------|---------------|--------------|---------------------|----------------------|---------------------|----------------------|
| <b>seq921</b>  | Firmicutes    | Clostridia   | 0                   | 0                    | 0                   | 0                    |
| <b>seq978</b>  | Firmicutes    | Clostridia   | 0                   | 0                    | 0                   | 0                    |
| <b>seq999</b>  | Firmicutes    | Clostridia   | 0                   | 0                    | 0                   | 0                    |
| <b>seq1067</b> | Firmicutes    | Clostridia   | 0                   | 0                    | 0                   | 0                    |
| <b>seq1074</b> | Firmicutes    | Clostridia   | 0                   | 0                    | 0                   | 0                    |
| <b>seq1143</b> | Firmicutes    | Clostridia   | 0                   | 0                    | 0                   | 0                    |
| <b>seq1421</b> | Firmicutes    | Clostridia   | 0                   | 39                   | 0                   | 0                    |
| <b>seq244</b>  | Firmicutes    | Clostridia   | 52                  | 26                   | 0                   | 0                    |
| <b>seq59</b>   | Firmicutes    | Clostridia   | 0                   | 0                    | 0                   | 0                    |
| <b>seq112</b>  | Firmicutes    | Clostridia   | 0                   | 0                    | 422                 | 14                   |
| <b>seq114</b>  | Firmicutes    | Clostridia   | 0                   | 0                    | 0                   | 0                    |
| <b>seq181</b>  | Firmicutes    | Clostridia   | 584                 | 508                  | 0                   | 0                    |
| <b>seq196</b>  | Firmicutes    | Clostridia   | 0                   | 0                    | 0                   | 0                    |
| <b>seq199</b>  | Firmicutes    | Clostridia   | 0                   | 0                    | 0                   | 0                    |
| <b>seq227</b>  | Firmicutes    | Clostridia   | 0                   | 0                    | 0                   | 0                    |
| <b>seq232</b>  | Firmicutes    | Clostridia   | 0                   | 0                    | 0                   | 0                    |
| <b>seq281</b>  | Firmicutes    | Clostridia   | 0                   | 0                    | 0                   | 0                    |
| <b>seq308</b>  | Firmicutes    | Clostridia   | 0                   | 0                    | 0                   | 0                    |
| <b>seq309</b>  | Firmicutes    | Clostridia   | 0                   | 0                    | 0                   | 0                    |
| <b>seq338</b>  | Firmicutes    | Clostridia   | 76                  | 68                   | 0                   | 0                    |
| <b>seq382</b>  | Firmicutes    | Clostridia   | 0                   | 0                    | 0                   | 0                    |
| <b>seq385</b>  | Firmicutes    | Clostridia   | 0                   | 0                    | 0                   | 0                    |
| <b>seq387</b>  | Firmicutes    | Clostridia   | 0                   | 0                    | 0                   | 0                    |
| <b>seq393</b>  | Firmicutes    | Clostridia   | 0                   | 0                    | 0                   | 0                    |
| <b>seq398</b>  | Firmicutes    | Clostridia   | 0                   | 0                    | 0                   | 0                    |
| <b>seq415</b>  | Firmicutes    | Clostridia   | 0                   | 0                    | 24                  | 16                   |
| <b>seq417</b>  | Firmicutes    | Clostridia   | 0                   | 0                    | 0                   | 0                    |
| <b>seq478</b>  | Firmicutes    | Clostridia   | 0                   | 0                    | 0                   | 0                    |
| <b>seq501</b>  | Firmicutes    | Clostridia   | 0                   | 0                    | 0                   | 0                    |
| <b>seq505</b>  | Firmicutes    | Clostridia   | 0                   | 0                    | 0                   | 0                    |
| <b>seq513</b>  | Firmicutes    | Clostridia   | 0                   | 0                    | 0                   | 0                    |
| <b>seq515</b>  | Firmicutes    | Clostridia   | 0                   | 0                    | 0                   | 0                    |

Sequence Count Table

|                | <b>Phylum</b> | <b>Class</b> | <b>Δ</b> |  |  |  |
|----------------|---------------|--------------|----------|--|--|--|
| <b>seq921</b>  | Firmicutes    | Clostridia   |          |  |  |  |
| <b>seq978</b>  | Firmicutes    | Clostridia   |          |  |  |  |
| <b>seq999</b>  | Firmicutes    | Clostridia   |          |  |  |  |
| <b>seq1067</b> | Firmicutes    | Clostridia   |          |  |  |  |
| <b>seq1074</b> | Firmicutes    | Clostridia   |          |  |  |  |
| <b>seq1143</b> | Firmicutes    | Clostridia   |          |  |  |  |
| <b>seq1421</b> | Firmicutes    | Clostridia   |          |  |  |  |
| <b>seq244</b>  | Firmicutes    | Clostridia   |          |  |  |  |
| <b>seq59</b>   | Firmicutes    | Clostridia   |          |  |  |  |
| <b>seq112</b>  | Firmicutes    | Clostridia   |          |  |  |  |
| <b>seq114</b>  | Firmicutes    | Clostridia   |          |  |  |  |
| <b>seq181</b>  | Firmicutes    | Clostridia   |          |  |  |  |
| <b>seq196</b>  | Firmicutes    | Clostridia   |          |  |  |  |
| <b>seq199</b>  | Firmicutes    | Clostridia   |          |  |  |  |
| <b>seq227</b>  | Firmicutes    | Clostridia   |          |  |  |  |
| <b>seq232</b>  | Firmicutes    | Clostridia   |          |  |  |  |
| <b>seq281</b>  | Firmicutes    | Clostridia   |          |  |  |  |
| <b>seq308</b>  | Firmicutes    | Clostridia   |          |  |  |  |
| <b>seq309</b>  | Firmicutes    | Clostridia   |          |  |  |  |
| <b>seq338</b>  | Firmicutes    | Clostridia   |          |  |  |  |
| <b>seq382</b>  | Firmicutes    | Clostridia   |          |  |  |  |
| <b>seq385</b>  | Firmicutes    | Clostridia   |          |  |  |  |
| <b>seq387</b>  | Firmicutes    | Clostridia   |          |  |  |  |
| <b>seq393</b>  | Firmicutes    | Clostridia   |          |  |  |  |
| <b>seq398</b>  | Firmicutes    | Clostridia   |          |  |  |  |
| <b>seq415</b>  | Firmicutes    | Clostridia   |          |  |  |  |
| <b>seq417</b>  | Firmicutes    | Clostridia   |          |  |  |  |
| <b>seq478</b>  | Firmicutes    | Clostridia   |          |  |  |  |
| <b>seq501</b>  | Firmicutes    | Clostridia   |          |  |  |  |
| <b>seq505</b>  | Firmicutes    | Clostridia   |          |  |  |  |
| <b>seq513</b>  | Firmicutes    | Clostridia   |          |  |  |  |
| <b>seq515</b>  | Firmicutes    | Clostridia   |          |  |  |  |

Sequence Count Table

|               | <b>Phylum</b> | <b>Class</b> | <b>Order</b>  | <b>Family</b>   |
|---------------|---------------|--------------|---------------|-----------------|
| <b>seq523</b> | Firmicutes    | Clostridia   | Clostridiales | Ruminococcaceae |
| <b>seq525</b> | Firmicutes    | Clostridia   | Clostridiales | Ruminococcaceae |
| <b>seq535</b> | Firmicutes    | Clostridia   | Clostridiales | Ruminococcaceae |
| <b>seq573</b> | Firmicutes    | Clostridia   | Clostridiales | Ruminococcaceae |
| <b>seq582</b> | Firmicutes    | Clostridia   | Clostridiales | Ruminococcaceae |
| <b>seq584</b> | Firmicutes    | Clostridia   | Clostridiales | Ruminococcaceae |
| <b>seq589</b> | Firmicutes    | Clostridia   | Clostridiales | Ruminococcaceae |
| <b>seq600</b> | Firmicutes    | Clostridia   | Clostridiales | Ruminococcaceae |
| <b>seq609</b> | Firmicutes    | Clostridia   | Clostridiales | Ruminococcaceae |
| <b>seq616</b> | Firmicutes    | Clostridia   | Clostridiales | Ruminococcaceae |
| <b>seq621</b> | Firmicutes    | Clostridia   | Clostridiales | Ruminococcaceae |
| <b>seq634</b> | Firmicutes    | Clostridia   | Clostridiales | Ruminococcaceae |
| <b>seq651</b> | Firmicutes    | Clostridia   | Clostridiales | Ruminococcaceae |
| <b>seq669</b> | Firmicutes    | Clostridia   | Clostridiales | Ruminococcaceae |
| <b>seq683</b> | Firmicutes    | Clostridia   | Clostridiales | Ruminococcaceae |
| <b>seq690</b> | Firmicutes    | Clostridia   | Clostridiales | Ruminococcaceae |
| <b>seq701</b> | Firmicutes    | Clostridia   | Clostridiales | Ruminococcaceae |
| <b>seq728</b> | Firmicutes    | Clostridia   | Clostridiales | Ruminococcaceae |
| <b>seq736</b> | Firmicutes    | Clostridia   | Clostridiales | Ruminococcaceae |
| <b>seq764</b> | Firmicutes    | Clostridia   | Clostridiales | Ruminococcaceae |
| <b>seq768</b> | Firmicutes    | Clostridia   | Clostridiales | Ruminococcaceae |
| <b>seq773</b> | Firmicutes    | Clostridia   | Clostridiales | Ruminococcaceae |
| <b>seq789</b> | Firmicutes    | Clostridia   | Clostridiales | Ruminococcaceae |
| <b>seq805</b> | Firmicutes    | Clostridia   | Clostridiales | Ruminococcaceae |
| <b>seq828</b> | Firmicutes    | Clostridia   | Clostridiales | Ruminococcaceae |
| <b>seq846</b> | Firmicutes    | Clostridia   | Clostridiales | Ruminococcaceae |
| <b>seq853</b> | Firmicutes    | Clostridia   | Clostridiales | Ruminococcaceae |
| <b>seq859</b> | Firmicutes    | Clostridia   | Clostridiales | Ruminococcaceae |
| <b>seq861</b> | Firmicutes    | Clostridia   | Clostridiales | Ruminococcaceae |
| <b>seq869</b> | Firmicutes    | Clostridia   | Clostridiales | Ruminococcaceae |
| <b>seq894</b> | Firmicutes    | Clostridia   | Clostridiales | Ruminococcaceae |
| <b>seq909</b> | Firmicutes    | Clostridia   | Clostridiales | Ruminococcaceae |

Sequence Count Table

|               | <b>Phylum</b> | <b>Class</b> | <b>Genus</b> | <b>Species</b> |
|---------------|---------------|--------------|--------------|----------------|
| <b>seq523</b> | Firmicutes    | Clostridia   |              |                |
| <b>seq525</b> | Firmicutes    | Clostridia   |              |                |
| <b>seq535</b> | Firmicutes    | Clostridia   |              |                |
| <b>seq573</b> | Firmicutes    | Clostridia   |              |                |
| <b>seq582</b> | Firmicutes    | Clostridia   |              |                |
| <b>seq584</b> | Firmicutes    | Clostridia   |              |                |
| <b>seq589</b> | Firmicutes    | Clostridia   |              |                |
| <b>seq600</b> | Firmicutes    | Clostridia   |              |                |
| <b>seq609</b> | Firmicutes    | Clostridia   |              |                |
| <b>seq616</b> | Firmicutes    | Clostridia   |              |                |
| <b>seq621</b> | Firmicutes    | Clostridia   |              |                |
| <b>seq634</b> | Firmicutes    | Clostridia   |              |                |
| <b>seq651</b> | Firmicutes    | Clostridia   |              |                |
| <b>seq669</b> | Firmicutes    | Clostridia   |              |                |
| <b>seq683</b> | Firmicutes    | Clostridia   |              |                |
| <b>seq690</b> | Firmicutes    | Clostridia   |              |                |
| <b>seq701</b> | Firmicutes    | Clostridia   |              |                |
| <b>seq728</b> | Firmicutes    | Clostridia   |              |                |
| <b>seq736</b> | Firmicutes    | Clostridia   |              |                |
| <b>seq764</b> | Firmicutes    | Clostridia   |              |                |
| <b>seq768</b> | Firmicutes    | Clostridia   |              |                |
| <b>seq773</b> | Firmicutes    | Clostridia   |              |                |
| <b>seq789</b> | Firmicutes    | Clostridia   |              |                |
| <b>seq805</b> | Firmicutes    | Clostridia   |              |                |
| <b>seq828</b> | Firmicutes    | Clostridia   |              |                |
| <b>seq846</b> | Firmicutes    | Clostridia   |              |                |
| <b>seq853</b> | Firmicutes    | Clostridia   |              |                |
| <b>seq859</b> | Firmicutes    | Clostridia   |              |                |
| <b>seq861</b> | Firmicutes    | Clostridia   |              |                |
| <b>seq869</b> | Firmicutes    | Clostridia   |              |                |
| <b>seq894</b> | Firmicutes    | Clostridia   |              |                |
| <b>seq909</b> | Firmicutes    | Clostridia   |              |                |



Sequence Count Table

|               | <b>Phylum</b> | <b>Class</b> | <b>Subject34WK0</b> | <b>Subject34WK12</b> | <b>Subject16WK0</b> | <b>Subject16WK12</b> |
|---------------|---------------|--------------|---------------------|----------------------|---------------------|----------------------|
| <b>seq523</b> | Firmicutes    | Clostridia   | 0                   | 0                    | 0                   | 0                    |
| <b>seq525</b> | Firmicutes    | Clostridia   | 0                   | 0                    | 0                   | 0                    |
| <b>seq535</b> | Firmicutes    | Clostridia   | 0                   | 0                    | 0                   | 0                    |
| <b>seq573</b> | Firmicutes    | Clostridia   | 0                   | 4                    | 0                   | 0                    |
| <b>seq582</b> | Firmicutes    | Clostridia   | 0                   | 0                    | 5                   | 10                   |
| <b>seq584</b> | Firmicutes    | Clostridia   | 0                   | 0                    | 0                   | 0                    |
| <b>seq589</b> | Firmicutes    | Clostridia   | 0                   | 0                    | 47                  | 72                   |
| <b>seq600</b> | Firmicutes    | Clostridia   | 0                   | 0                    | 0                   | 0                    |
| <b>seq609</b> | Firmicutes    | Clostridia   | 0                   | 0                    | 0                   | 0                    |
| <b>seq616</b> | Firmicutes    | Clostridia   | 0                   | 0                    | 0                   | 0                    |
| <b>seq621</b> | Firmicutes    | Clostridia   | 0                   | 0                    | 0                   | 0                    |
| <b>seq634</b> | Firmicutes    | Clostridia   | 0                   | 0                    | 0                   | 0                    |
| <b>seq651</b> | Firmicutes    | Clostridia   | 0                   | 0                    | 0                   | 0                    |
| <b>seq669</b> | Firmicutes    | Clostridia   | 0                   | 0                    | 0                   | 0                    |
| <b>seq683</b> | Firmicutes    | Clostridia   | 0                   | 0                    | 0                   | 0                    |
| <b>seq690</b> | Firmicutes    | Clostridia   | 0                   | 0                    | 0                   | 0                    |
| <b>seq701</b> | Firmicutes    | Clostridia   | 0                   | 0                    | 0                   | 0                    |
| <b>seq728</b> | Firmicutes    | Clostridia   | 0                   | 0                    | 0                   | 0                    |
| <b>seq736</b> | Firmicutes    | Clostridia   | 0                   | 0                    | 0                   | 0                    |
| <b>seq764</b> | Firmicutes    | Clostridia   | 0                   | 0                    | 0                   | 0                    |
| <b>seq768</b> | Firmicutes    | Clostridia   | 0                   | 0                    | 0                   | 0                    |
| <b>seq773</b> | Firmicutes    | Clostridia   | 0                   | 0                    | 0                   | 0                    |
| <b>seq789</b> | Firmicutes    | Clostridia   | 0                   | 0                    | 0                   | 0                    |
| <b>seq805</b> | Firmicutes    | Clostridia   | 0                   | 0                    | 0                   | 0                    |
| <b>seq828</b> | Firmicutes    | Clostridia   | 0                   | 0                    | 0                   | 0                    |
| <b>seq846</b> | Firmicutes    | Clostridia   | 0                   | 0                    | 0                   | 12                   |
| <b>seq853</b> | Firmicutes    | Clostridia   | 0                   | 0                    | 0                   | 0                    |
| <b>seq859</b> | Firmicutes    | Clostridia   | 0                   | 0                    | 0                   | 0                    |
| <b>seq861</b> | Firmicutes    | Clostridia   | 0                   | 0                    | 0                   | 0                    |
| <b>seq869</b> | Firmicutes    | Clostridia   | 0                   | 0                    | 0                   | 0                    |
| <b>seq894</b> | Firmicutes    | Clostridia   | 0                   | 0                    | 0                   | 0                    |
| <b>seq909</b> | Firmicutes    | Clostridia   | 0                   | 0                    | 0                   | 0                    |

Sequence Count Table

|               | <b>Phylum</b> | <b>Class</b> | <b>Subject17WK0</b> | <b>Subject17WK12</b> | <b>Subject1WK0</b> | <b>Subject1WK12</b> |
|---------------|---------------|--------------|---------------------|----------------------|--------------------|---------------------|
| <b>seq523</b> | Firmicutes    | Clostridia   | 0                   | 0                    | 0                  | 0                   |
| <b>seq525</b> | Firmicutes    | Clostridia   | 408                 | 171                  | 0                  | 0                   |
| <b>seq535</b> | Firmicutes    | Clostridia   | 486                 | 183                  | 0                  | 0                   |
| <b>seq573</b> | Firmicutes    | Clostridia   | 0                   | 0                    | 5                  | 0                   |
| <b>seq582</b> | Firmicutes    | Clostridia   | 11                  | 10                   | 0                  | 0                   |
| <b>seq584</b> | Firmicutes    | Clostridia   | 0                   | 0                    | 0                  | 0                   |
| <b>seq589</b> | Firmicutes    | Clostridia   | 0                   | 0                    | 0                  | 0                   |
| <b>seq600</b> | Firmicutes    | Clostridia   | 0                   | 0                    | 0                  | 0                   |
| <b>seq609</b> | Firmicutes    | Clostridia   | 0                   | 0                    | 0                  | 0                   |
| <b>seq616</b> | Firmicutes    | Clostridia   | 8                   | 14                   | 6                  | 10                  |
| <b>seq621</b> | Firmicutes    | Clostridia   | 0                   | 0                    | 0                  | 0                   |
| <b>seq634</b> | Firmicutes    | Clostridia   | 0                   | 0                    | 0                  | 0                   |
| <b>seq651</b> | Firmicutes    | Clostridia   | 0                   | 0                    | 0                  | 0                   |
| <b>seq669</b> | Firmicutes    | Clostridia   | 0                   | 0                    | 0                  | 0                   |
| <b>seq683</b> | Firmicutes    | Clostridia   | 0                   | 0                    | 0                  | 0                   |
| <b>seq690</b> | Firmicutes    | Clostridia   | 0                   | 393                  | 0                  | 0                   |
| <b>seq701</b> | Firmicutes    | Clostridia   | 0                   | 0                    | 0                  | 0                   |
| <b>seq728</b> | Firmicutes    | Clostridia   | 0                   | 8                    | 0                  | 0                   |
| <b>seq736</b> | Firmicutes    | Clostridia   | 0                   | 0                    | 0                  | 0                   |
| <b>seq764</b> | Firmicutes    | Clostridia   | 0                   | 0                    | 0                  | 0                   |
| <b>seq768</b> | Firmicutes    | Clostridia   | 0                   | 0                    | 0                  | 0                   |
| <b>seq773</b> | Firmicutes    | Clostridia   | 0                   | 0                    | 42                 | 28                  |
| <b>seq789</b> | Firmicutes    | Clostridia   | 0                   | 0                    | 0                  | 0                   |
| <b>seq805</b> | Firmicutes    | Clostridia   | 0                   | 0                    | 0                  | 0                   |
| <b>seq828</b> | Firmicutes    | Clostridia   | 0                   | 0                    | 10                 | 0                   |
| <b>seq846</b> | Firmicutes    | Clostridia   | 0                   | 0                    | 0                  | 0                   |
| <b>seq853</b> | Firmicutes    | Clostridia   | 0                   | 0                    | 0                  | 0                   |
| <b>seq859</b> | Firmicutes    | Clostridia   | 0                   | 0                    | 0                  | 0                   |
| <b>seq861</b> | Firmicutes    | Clostridia   | 0                   | 0                    | 0                  | 0                   |
| <b>seq869</b> | Firmicutes    | Clostridia   | 0                   | 0                    | 0                  | 0                   |
| <b>seq894</b> | Firmicutes    | Clostridia   | 0                   | 0                    | 0                  | 0                   |
| <b>seq909</b> | Firmicutes    | Clostridia   | 0                   | 0                    | 0                  | 0                   |

Sequence Count Table

|               | <b>Phylum</b> | <b>Class</b> | <b>Subject2WK0</b> | <b>Subject2WK12</b> | <b>Subject3WK0</b> | <b>Subject3WK12</b> |
|---------------|---------------|--------------|--------------------|---------------------|--------------------|---------------------|
| <b>seq523</b> | Firmicutes    | Clostridia   | 0                  | 0                   | 0                  | 0                   |
| <b>seq525</b> | Firmicutes    | Clostridia   | 0                  | 0                   | 0                  | 0                   |
| <b>seq535</b> | Firmicutes    | Clostridia   | 0                  | 0                   | 0                  | 0                   |
| <b>seq573</b> | Firmicutes    | Clostridia   | 0                  | 0                   | 0                  | 0                   |
| <b>seq582</b> | Firmicutes    | Clostridia   | 0                  | 0                   | 0                  | 0                   |
| <b>seq584</b> | Firmicutes    | Clostridia   | 0                  | 0                   | 0                  | 0                   |
| <b>seq589</b> | Firmicutes    | Clostridia   | 0                  | 0                   | 0                  | 89                  |
| <b>seq600</b> | Firmicutes    | Clostridia   | 0                  | 0                   | 0                  | 0                   |
| <b>seq609</b> | Firmicutes    | Clostridia   | 0                  | 0                   | 0                  | 0                   |
| <b>seq616</b> | Firmicutes    | Clostridia   | 0                  | 0                   | 0                  | 0                   |
| <b>seq621</b> | Firmicutes    | Clostridia   | 0                  | 0                   | 0                  | 0                   |
| <b>seq634</b> | Firmicutes    | Clostridia   | 0                  | 0                   | 0                  | 0                   |
| <b>seq651</b> | Firmicutes    | Clostridia   | 0                  | 0                   | 0                  | 0                   |
| <b>seq669</b> | Firmicutes    | Clostridia   | 0                  | 0                   | 0                  | 0                   |
| <b>seq683</b> | Firmicutes    | Clostridia   | 0                  | 0                   | 0                  | 0                   |
| <b>seq690</b> | Firmicutes    | Clostridia   | 0                  | 0                   | 0                  | 0                   |
| <b>seq701</b> | Firmicutes    | Clostridia   | 0                  | 0                   | 0                  | 0                   |
| <b>seq728</b> | Firmicutes    | Clostridia   | 0                  | 0                   | 0                  | 0                   |
| <b>seq736</b> | Firmicutes    | Clostridia   | 0                  | 0                   | 0                  | 0                   |
| <b>seq764</b> | Firmicutes    | Clostridia   | 0                  | 0                   | 0                  | 0                   |
| <b>seq768</b> | Firmicutes    | Clostridia   | 0                  | 0                   | 0                  | 0                   |
| <b>seq773</b> | Firmicutes    | Clostridia   | 0                  | 0                   | 0                  | 0                   |
| <b>seq789</b> | Firmicutes    | Clostridia   | 0                  | 0                   | 0                  | 0                   |
| <b>seq805</b> | Firmicutes    | Clostridia   | 0                  | 0                   | 0                  | 0                   |
| <b>seq828</b> | Firmicutes    | Clostridia   | 0                  | 0                   | 0                  | 0                   |
| <b>seq846</b> | Firmicutes    | Clostridia   | 0                  | 0                   | 0                  | 0                   |
| <b>seq853</b> | Firmicutes    | Clostridia   | 0                  | 0                   | 0                  | 0                   |
| <b>seq859</b> | Firmicutes    | Clostridia   | 0                  | 0                   | 0                  | 0                   |
| <b>seq861</b> | Firmicutes    | Clostridia   | 0                  | 0                   | 0                  | 0                   |
| <b>seq869</b> | Firmicutes    | Clostridia   | 8                  | 0                   | 0                  | 0                   |
| <b>seq894</b> | Firmicutes    | Clostridia   | 0                  | 0                   | 0                  | 0                   |
| <b>seq909</b> | Firmicutes    | Clostridia   | 0                  | 0                   | 0                  | 0                   |

Sequence Count Table

|               | <b>Phylum</b> | <b>Class</b> | <b>Subject4WK0</b> | <b>Subject4WK12</b> | <b>Subject5WK0</b> | <b>Subject5WK12</b> |
|---------------|---------------|--------------|--------------------|---------------------|--------------------|---------------------|
| <b>seq523</b> | Firmicutes    | Clostridia   | 0                  | 0                   | 0                  | 0                   |
| <b>seq525</b> | Firmicutes    | Clostridia   | 0                  | 0                   | 0                  | 0                   |
| <b>seq535</b> | Firmicutes    | Clostridia   | 0                  | 0                   | 0                  | 0                   |
| <b>seq573</b> | Firmicutes    | Clostridia   | 0                  | 0                   | 46                 | 103                 |
| <b>seq582</b> | Firmicutes    | Clostridia   | 0                  | 0                   | 0                  | 0                   |
| <b>seq584</b> | Firmicutes    | Clostridia   | 0                  | 0                   | 0                  | 0                   |
| <b>seq589</b> | Firmicutes    | Clostridia   | 0                  | 0                   | 0                  | 0                   |
| <b>seq600</b> | Firmicutes    | Clostridia   | 44                 | 0                   | 0                  | 0                   |
| <b>seq609</b> | Firmicutes    | Clostridia   | 0                  | 0                   | 0                  | 0                   |
| <b>seq616</b> | Firmicutes    | Clostridia   | 0                  | 0                   | 0                  | 0                   |
| <b>seq621</b> | Firmicutes    | Clostridia   | 0                  | 0                   | 0                  | 0                   |
| <b>seq634</b> | Firmicutes    | Clostridia   | 54                 | 0                   | 0                  | 0                   |
| <b>seq651</b> | Firmicutes    | Clostridia   | 0                  | 0                   | 0                  | 0                   |
| <b>seq669</b> | Firmicutes    | Clostridia   | 0                  | 0                   | 0                  | 0                   |
| <b>seq683</b> | Firmicutes    | Clostridia   | 20                 | 0                   | 0                  | 0                   |
| <b>seq690</b> | Firmicutes    | Clostridia   | 0                  | 0                   | 0                  | 0                   |
| <b>seq701</b> | Firmicutes    | Clostridia   | 0                  | 0                   | 0                  | 0                   |
| <b>seq728</b> | Firmicutes    | Clostridia   | 67                 | 34                  | 0                  | 0                   |
| <b>seq736</b> | Firmicutes    | Clostridia   | 12                 | 0                   | 0                  | 0                   |
| <b>seq764</b> | Firmicutes    | Clostridia   | 7                  | 0                   | 0                  | 0                   |
| <b>seq768</b> | Firmicutes    | Clostridia   | 0                  | 0                   | 0                  | 0                   |
| <b>seq773</b> | Firmicutes    | Clostridia   | 0                  | 0                   | 0                  | 0                   |
| <b>seq789</b> | Firmicutes    | Clostridia   | 0                  | 0                   | 0                  | 0                   |
| <b>seq805</b> | Firmicutes    | Clostridia   | 0                  | 0                   | 0                  | 0                   |
| <b>seq828</b> | Firmicutes    | Clostridia   | 0                  | 24                  | 12                 | 0                   |
| <b>seq846</b> | Firmicutes    | Clostridia   | 0                  | 0                   | 0                  | 0                   |
| <b>seq853</b> | Firmicutes    | Clostridia   | 0                  | 0                   | 0                  | 0                   |
| <b>seq859</b> | Firmicutes    | Clostridia   | 6                  | 19                  | 0                  | 15                  |
| <b>seq861</b> | Firmicutes    | Clostridia   | 0                  | 0                   | 0                  | 0                   |
| <b>seq869</b> | Firmicutes    | Clostridia   | 30                 | 10                  | 24                 | 62                  |
| <b>seq894</b> | Firmicutes    | Clostridia   | 0                  | 0                   | 0                  | 0                   |
| <b>seq909</b> | Firmicutes    | Clostridia   | 8                  | 0                   | 0                  | 36                  |

Sequence Count Table

|               | <b>Phylum</b> | <b>Class</b> | <b>Subject6WK0</b> | <b>Subject6WK12</b> | <b>Subject18WK0</b> | <b>Subject18WK12</b> |
|---------------|---------------|--------------|--------------------|---------------------|---------------------|----------------------|
| <b>seq523</b> | Firmicutes    | Clostridia   | 0                  | 0                   | 0                   | 0                    |
| <b>seq525</b> | Firmicutes    | Clostridia   | 0                  | 0                   | 0                   | 0                    |
| <b>seq535</b> | Firmicutes    | Clostridia   | 0                  | 0                   | 0                   | 0                    |
| <b>seq573</b> | Firmicutes    | Clostridia   | 0                  | 0                   | 0                   | 0                    |
| <b>seq582</b> | Firmicutes    | Clostridia   | 40                 | 61                  | 0                   | 0                    |
| <b>seq584</b> | Firmicutes    | Clostridia   | 0                  | 0                   | 0                   | 0                    |
| <b>seq589</b> | Firmicutes    | Clostridia   | 0                  | 0                   | 145                 | 76                   |
| <b>seq600</b> | Firmicutes    | Clostridia   | 52                 | 0                   | 0                   | 0                    |
| <b>seq609</b> | Firmicutes    | Clostridia   | 72                 | 53                  | 0                   | 0                    |
| <b>seq616</b> | Firmicutes    | Clostridia   | 0                  | 14                  | 0                   | 0                    |
| <b>seq621</b> | Firmicutes    | Clostridia   | 0                  | 0                   | 0                   | 0                    |
| <b>seq634</b> | Firmicutes    | Clostridia   | 144                | 293                 | 0                   | 0                    |
| <b>seq651</b> | Firmicutes    | Clostridia   | 0                  | 0                   | 0                   | 0                    |
| <b>seq669</b> | Firmicutes    | Clostridia   | 0                  | 0                   | 0                   | 0                    |
| <b>seq683</b> | Firmicutes    | Clostridia   | 0                  | 0                   | 0                   | 0                    |
| <b>seq690</b> | Firmicutes    | Clostridia   | 0                  | 0                   | 0                   | 0                    |
| <b>seq701</b> | Firmicutes    | Clostridia   | 0                  | 0                   | 0                   | 0                    |
| <b>seq728</b> | Firmicutes    | Clostridia   | 0                  | 0                   | 0                   | 0                    |
| <b>seq736</b> | Firmicutes    | Clostridia   | 0                  | 0                   | 0                   | 0                    |
| <b>seq764</b> | Firmicutes    | Clostridia   | 18                 | 27                  | 0                   | 0                    |
| <b>seq768</b> | Firmicutes    | Clostridia   | 0                  | 0                   | 0                   | 0                    |
| <b>seq773</b> | Firmicutes    | Clostridia   | 0                  | 0                   | 0                   | 0                    |
| <b>seq789</b> | Firmicutes    | Clostridia   | 31                 | 10                  | 0                   | 0                    |
| <b>seq805</b> | Firmicutes    | Clostridia   | 0                  | 0                   | 0                   | 0                    |
| <b>seq828</b> | Firmicutes    | Clostridia   | 0                  | 0                   | 55                  | 15                   |
| <b>seq846</b> | Firmicutes    | Clostridia   | 28                 | 50                  | 0                   | 0                    |
| <b>seq853</b> | Firmicutes    | Clostridia   | 0                  | 0                   | 0                   | 0                    |
| <b>seq859</b> | Firmicutes    | Clostridia   | 0                  | 0                   | 64                  | 5                    |
| <b>seq861</b> | Firmicutes    | Clostridia   | 0                  | 0                   | 0                   | 0                    |
| <b>seq869</b> | Firmicutes    | Clostridia   | 0                  | 0                   | 12                  | 0                    |
| <b>seq894</b> | Firmicutes    | Clostridia   | 0                  | 201                 | 0                   | 0                    |
| <b>seq909</b> | Firmicutes    | Clostridia   | 0                  | 12                  | 0                   | 0                    |

Sequence Count Table

|               | <b>Phylum</b> | <b>Class</b> | <b>Subject19WK0</b> | <b>Subject19WK12</b> | <b>Subject20WK0</b> | <b>Subject20WK12</b> |
|---------------|---------------|--------------|---------------------|----------------------|---------------------|----------------------|
| <b>seq523</b> | Firmicutes    | Clostridia   | 0                   | 0                    | 0                   | 0                    |
| <b>seq525</b> | Firmicutes    | Clostridia   | 36                  | 62                   | 0                   | 0                    |
| <b>seq535</b> | Firmicutes    | Clostridia   | 0                   | 0                    | 0                   | 0                    |
| <b>seq573</b> | Firmicutes    | Clostridia   | 16                  | 174                  | 0                   | 0                    |
| <b>seq582</b> | Firmicutes    | Clostridia   | 0                   | 8                    | 69                  | 13                   |
| <b>seq584</b> | Firmicutes    | Clostridia   | 0                   | 0                    | 0                   | 0                    |
| <b>seq589</b> | Firmicutes    | Clostridia   | 0                   | 0                    | 0                   | 0                    |
| <b>seq600</b> | Firmicutes    | Clostridia   | 0                   | 0                    | 45                  | 0                    |
| <b>seq609</b> | Firmicutes    | Clostridia   | 0                   | 0                    | 108                 | 83                   |
| <b>seq616</b> | Firmicutes    | Clostridia   | 0                   | 0                    | 0                   | 0                    |
| <b>seq621</b> | Firmicutes    | Clostridia   | 0                   | 0                    | 0                   | 0                    |
| <b>seq634</b> | Firmicutes    | Clostridia   | 0                   | 0                    | 0                   | 0                    |
| <b>seq651</b> | Firmicutes    | Clostridia   | 0                   | 0                    | 317                 | 69                   |
| <b>seq669</b> | Firmicutes    | Clostridia   | 0                   | 0                    | 414                 | 18                   |
| <b>seq683</b> | Firmicutes    | Clostridia   | 0                   | 0                    | 0                   | 0                    |
| <b>seq690</b> | Firmicutes    | Clostridia   | 0                   | 0                    | 0                   | 0                    |
| <b>seq701</b> | Firmicutes    | Clostridia   | 0                   | 0                    | 0                   | 0                    |
| <b>seq728</b> | Firmicutes    | Clostridia   | 0                   | 0                    | 0                   | 0                    |
| <b>seq736</b> | Firmicutes    | Clostridia   | 0                   | 0                    | 0                   | 0                    |
| <b>seq764</b> | Firmicutes    | Clostridia   | 0                   | 0                    | 26                  | 0                    |
| <b>seq768</b> | Firmicutes    | Clostridia   | 0                   | 0                    | 0                   | 0                    |
| <b>seq773</b> | Firmicutes    | Clostridia   | 0                   | 0                    | 0                   | 0                    |
| <b>seq789</b> | Firmicutes    | Clostridia   | 0                   | 0                    | 0                   | 0                    |
| <b>seq805</b> | Firmicutes    | Clostridia   | 0                   | 0                    | 14                  | 254                  |
| <b>seq828</b> | Firmicutes    | Clostridia   | 0                   | 0                    | 0                   | 0                    |
| <b>seq846</b> | Firmicutes    | Clostridia   | 0                   | 0                    | 0                   | 0                    |
| <b>seq853</b> | Firmicutes    | Clostridia   | 0                   | 0                    | 0                   | 0                    |
| <b>seq859</b> | Firmicutes    | Clostridia   | 0                   | 0                    | 0                   | 0                    |
| <b>seq861</b> | Firmicutes    | Clostridia   | 0                   | 0                    | 0                   | 0                    |
| <b>seq869</b> | Firmicutes    | Clostridia   | 0                   | 0                    | 0                   | 0                    |
| <b>seq894</b> | Firmicutes    | Clostridia   | 0                   | 0                    | 0                   | 0                    |
| <b>seq909</b> | Firmicutes    | Clostridia   | 0                   | 0                    | 0                   | 6                    |

Sequence Count Table

|               | <b>Phylum</b> | <b>Class</b> | <b>Subject7WK0</b> | <b>Subject7WK12</b> | <b>Subject21WK0</b> | <b>Subject21WK12</b> |
|---------------|---------------|--------------|--------------------|---------------------|---------------------|----------------------|
| <b>seq523</b> | Firmicutes    | Clostridia   | 0                  | 0                   | 0                   | 0                    |
| <b>seq525</b> | Firmicutes    | Clostridia   | 0                  | 0                   | 0                   | 0                    |
| <b>seq535</b> | Firmicutes    | Clostridia   | 0                  | 0                   | 0                   | 0                    |
| <b>seq573</b> | Firmicutes    | Clostridia   | 0                  | 0                   | 0                   | 0                    |
| <b>seq582</b> | Firmicutes    | Clostridia   | 10                 | 21                  | 0                   | 0                    |
| <b>seq584</b> | Firmicutes    | Clostridia   | 0                  | 0                   | 0                   | 0                    |
| <b>seq589</b> | Firmicutes    | Clostridia   | 0                  | 0                   | 0                   | 0                    |
| <b>seq600</b> | Firmicutes    | Clostridia   | 0                  | 0                   | 0                   | 0                    |
| <b>seq609</b> | Firmicutes    | Clostridia   | 0                  | 0                   | 0                   | 0                    |
| <b>seq616</b> | Firmicutes    | Clostridia   | 105                | 0                   | 0                   | 0                    |
| <b>seq621</b> | Firmicutes    | Clostridia   | 0                  | 32                  | 0                   | 0                    |
| <b>seq634</b> | Firmicutes    | Clostridia   | 0                  | 0                   | 0                   | 0                    |
| <b>seq651</b> | Firmicutes    | Clostridia   | 0                  | 0                   | 0                   | 0                    |
| <b>seq669</b> | Firmicutes    | Clostridia   | 0                  | 0                   | 0                   | 0                    |
| <b>seq683</b> | Firmicutes    | Clostridia   | 0                  | 0                   | 0                   | 0                    |
| <b>seq690</b> | Firmicutes    | Clostridia   | 0                  | 0                   | 0                   | 0                    |
| <b>seq701</b> | Firmicutes    | Clostridia   | 0                  | 0                   | 0                   | 0                    |
| <b>seq728</b> | Firmicutes    | Clostridia   | 0                  | 0                   | 0                   | 0                    |
| <b>seq736</b> | Firmicutes    | Clostridia   | 0                  | 0                   | 0                   | 0                    |
| <b>seq764</b> | Firmicutes    | Clostridia   | 0                  | 0                   | 0                   | 0                    |
| <b>seq768</b> | Firmicutes    | Clostridia   | 0                  | 0                   | 0                   | 0                    |
| <b>seq773</b> | Firmicutes    | Clostridia   | 0                  | 0                   | 0                   | 0                    |
| <b>seq789</b> | Firmicutes    | Clostridia   | 8                  | 8                   | 0                   | 0                    |
| <b>seq805</b> | Firmicutes    | Clostridia   | 0                  | 0                   | 0                   | 0                    |
| <b>seq828</b> | Firmicutes    | Clostridia   | 0                  | 0                   | 0                   | 0                    |
| <b>seq846</b> | Firmicutes    | Clostridia   | 0                  | 0                   | 0                   | 0                    |
| <b>seq853</b> | Firmicutes    | Clostridia   | 0                  | 0                   | 0                   | 0                    |
| <b>seq859</b> | Firmicutes    | Clostridia   | 8                  | 3                   | 0                   | 0                    |
| <b>seq861</b> | Firmicutes    | Clostridia   | 0                  | 0                   | 0                   | 0                    |
| <b>seq869</b> | Firmicutes    | Clostridia   | 0                  | 0                   | 0                   | 0                    |
| <b>seq894</b> | Firmicutes    | Clostridia   | 0                  | 0                   | 0                   | 0                    |
| <b>seq909</b> | Firmicutes    | Clostridia   | 0                  | 0                   | 0                   | 0                    |

Sequence Count Table

|               | <b>Phylum</b> | <b>Class</b> | <b>Subject8WK0</b> | <b>Subject8WK12</b> | <b>Subject9WK0</b> | <b>Subject9WK12</b> |
|---------------|---------------|--------------|--------------------|---------------------|--------------------|---------------------|
| <b>seq523</b> | Firmicutes    | Clostridia   | 0                  | 0                   | 0                  | 0                   |
| <b>seq525</b> | Firmicutes    | Clostridia   | 0                  | 0                   | 0                  | 0                   |
| <b>seq535</b> | Firmicutes    | Clostridia   | 0                  | 0                   | 0                  | 0                   |
| <b>seq573</b> | Firmicutes    | Clostridia   | 29                 | 39                  | 30                 | 0                   |
| <b>seq582</b> | Firmicutes    | Clostridia   | 0                  | 0                   | 0                  | 0                   |
| <b>seq584</b> | Firmicutes    | Clostridia   | 0                  | 0                   | 0                  | 0                   |
| <b>seq589</b> | Firmicutes    | Clostridia   | 0                  | 0                   | 0                  | 53                  |
| <b>seq600</b> | Firmicutes    | Clostridia   | 0                  | 0                   | 0                  | 0                   |
| <b>seq609</b> | Firmicutes    | Clostridia   | 0                  | 0                   | 0                  | 0                   |
| <b>seq616</b> | Firmicutes    | Clostridia   | 0                  | 0                   | 0                  | 0                   |
| <b>seq621</b> | Firmicutes    | Clostridia   | 0                  | 0                   | 14                 | 0                   |
| <b>seq634</b> | Firmicutes    | Clostridia   | 0                  | 0                   | 0                  | 0                   |
| <b>seq651</b> | Firmicutes    | Clostridia   | 0                  | 0                   | 0                  | 0                   |
| <b>seq669</b> | Firmicutes    | Clostridia   | 0                  | 0                   | 0                  | 0                   |
| <b>seq683</b> | Firmicutes    | Clostridia   | 0                  | 0                   | 0                  | 0                   |
| <b>seq690</b> | Firmicutes    | Clostridia   | 0                  | 0                   | 0                  | 0                   |
| <b>seq701</b> | Firmicutes    | Clostridia   | 0                  | 0                   | 0                  | 0                   |
| <b>seq728</b> | Firmicutes    | Clostridia   | 50                 | 32                  | 0                  | 0                   |
| <b>seq736</b> | Firmicutes    | Clostridia   | 44                 | 24                  | 87                 | 14                  |
| <b>seq764</b> | Firmicutes    | Clostridia   | 0                  | 0                   | 0                  | 0                   |
| <b>seq768</b> | Firmicutes    | Clostridia   | 0                  | 0                   | 0                  | 219                 |
| <b>seq773</b> | Firmicutes    | Clostridia   | 0                  | 0                   | 0                  | 0                   |
| <b>seq789</b> | Firmicutes    | Clostridia   | 0                  | 0                   | 0                  | 0                   |
| <b>seq805</b> | Firmicutes    | Clostridia   | 0                  | 0                   | 0                  | 0                   |
| <b>seq828</b> | Firmicutes    | Clostridia   | 0                  | 0                   | 15                 | 0                   |
| <b>seq846</b> | Firmicutes    | Clostridia   | 0                  | 0                   | 0                  | 0                   |
| <b>seq853</b> | Firmicutes    | Clostridia   | 0                  | 0                   | 0                  | 0                   |
| <b>seq859</b> | Firmicutes    | Clostridia   | 0                  | 0                   | 21                 | 0                   |
| <b>seq861</b> | Firmicutes    | Clostridia   | 50                 | 25                  | 0                  | 0                   |
| <b>seq869</b> | Firmicutes    | Clostridia   | 0                  | 0                   | 46                 | 0                   |
| <b>seq894</b> | Firmicutes    | Clostridia   | 0                  | 0                   | 0                  | 0                   |
| <b>seq909</b> | Firmicutes    | Clostridia   | 32                 | 19                  | 0                  | 0                   |



Sequence Count Table

|               | <b>Phylum</b> | <b>Class</b> | <b>Subject10WK0</b> | <b>Subject10WK12</b> | <b>Subject22WK0</b> | <b>Subject22WK12</b> |
|---------------|---------------|--------------|---------------------|----------------------|---------------------|----------------------|
| <b>seq523</b> | Firmicutes    | Clostridia   | 0                   | 0                    | 0                   | 0                    |
| <b>seq525</b> | Firmicutes    | Clostridia   | 22                  | 15                   | 0                   | 0                    |
| <b>seq535</b> | Firmicutes    | Clostridia   | 0                   | 0                    | 0                   | 0                    |
| <b>seq573</b> | Firmicutes    | Clostridia   | 8                   | 11                   | 0                   | 0                    |
| <b>seq582</b> | Firmicutes    | Clostridia   | 0                   | 0                    | 36                  | 17                   |
| <b>seq584</b> | Firmicutes    | Clostridia   | 0                   | 0                    | 304                 | 269                  |
| <b>seq589</b> | Firmicutes    | Clostridia   | 0                   | 0                    | 0                   | 0                    |
| <b>seq600</b> | Firmicutes    | Clostridia   | 0                   | 0                    | 178                 | 108                  |
| <b>seq609</b> | Firmicutes    | Clostridia   | 0                   | 0                    | 106                 | 97                   |
| <b>seq616</b> | Firmicutes    | Clostridia   | 0                   | 0                    | 12                  | 0                    |
| <b>seq621</b> | Firmicutes    | Clostridia   | 0                   | 0                    | 24                  | 0                    |
| <b>seq634</b> | Firmicutes    | Clostridia   | 0                   | 0                    | 0                   | 0                    |
| <b>seq651</b> | Firmicutes    | Clostridia   | 0                   | 0                    | 73                  | 0                    |
| <b>seq669</b> | Firmicutes    | Clostridia   | 0                   | 0                    | 0                   | 0                    |
| <b>seq683</b> | Firmicutes    | Clostridia   | 0                   | 0                    | 41                  | 231                  |
| <b>seq690</b> | Firmicutes    | Clostridia   | 0                   | 0                    | 0                   | 0                    |
| <b>seq701</b> | Firmicutes    | Clostridia   | 0                   | 0                    | 32                  | 46                   |
| <b>seq728</b> | Firmicutes    | Clostridia   | 0                   | 0                    | 0                   | 0                    |
| <b>seq736</b> | Firmicutes    | Clostridia   | 0                   | 0                    | 0                   | 0                    |
| <b>seq764</b> | Firmicutes    | Clostridia   | 0                   | 0                    | 76                  | 72                   |
| <b>seq768</b> | Firmicutes    | Clostridia   | 0                   | 0                    | 0                   | 0                    |
| <b>seq773</b> | Firmicutes    | Clostridia   | 0                   | 0                    | 0                   | 0                    |
| <b>seq789</b> | Firmicutes    | Clostridia   | 0                   | 0                    | 11                  | 64                   |
| <b>seq805</b> | Firmicutes    | Clostridia   | 0                   | 0                    | 0                   | 0                    |
| <b>seq828</b> | Firmicutes    | Clostridia   | 0                   | 0                    | 0                   | 0                    |
| <b>seq846</b> | Firmicutes    | Clostridia   | 0                   | 0                    | 0                   | 0                    |
| <b>seq853</b> | Firmicutes    | Clostridia   | 0                   | 0                    | 0                   | 0                    |
| <b>seq859</b> | Firmicutes    | Clostridia   | 0                   | 0                    | 0                   | 0                    |
| <b>seq861</b> | Firmicutes    | Clostridia   | 101                 | 25                   | 0                   | 0                    |
| <b>seq869</b> | Firmicutes    | Clostridia   | 0                   | 0                    | 0                   | 0                    |
| <b>seq894</b> | Firmicutes    | Clostridia   | 0                   | 0                    | 0                   | 0                    |
| <b>seq909</b> | Firmicutes    | Clostridia   | 0                   | 0                    | 8                   | 5                    |

Sequence Count Table

|               | <b>Phylum</b> | <b>Class</b> | <b>Subject23WK0</b> | <b>Subject23WK12</b> | <b>Subject24WK0</b> | <b>Subject24WK12</b> |
|---------------|---------------|--------------|---------------------|----------------------|---------------------|----------------------|
| <b>seq523</b> | Firmicutes    | Clostridia   | 133                 | 585                  | 0                   | 0                    |
| <b>seq525</b> | Firmicutes    | Clostridia   | 0                   | 0                    | 0                   | 0                    |
| <b>seq535</b> | Firmicutes    | Clostridia   | 0                   | 0                    | 0                   | 0                    |
| <b>seq573</b> | Firmicutes    | Clostridia   | 0                   | 0                    | 0                   | 0                    |
| <b>seq582</b> | Firmicutes    | Clostridia   | 0                   | 21                   | 0                   | 0                    |
| <b>seq584</b> | Firmicutes    | Clostridia   | 0                   | 0                    | 0                   | 0                    |
| <b>seq589</b> | Firmicutes    | Clostridia   | 0                   | 0                    | 0                   | 0                    |
| <b>seq600</b> | Firmicutes    | Clostridia   | 0                   | 0                    | 0                   | 0                    |
| <b>seq609</b> | Firmicutes    | Clostridia   | 0                   | 0                    | 0                   | 0                    |
| <b>seq616</b> | Firmicutes    | Clostridia   | 0                   | 0                    | 0                   | 0                    |
| <b>seq621</b> | Firmicutes    | Clostridia   | 0                   | 20                   | 18                  | 0                    |
| <b>seq634</b> | Firmicutes    | Clostridia   | 0                   | 0                    | 0                   | 0                    |
| <b>seq651</b> | Firmicutes    | Clostridia   | 0                   | 0                    | 0                   | 0                    |
| <b>seq669</b> | Firmicutes    | Clostridia   | 0                   | 0                    | 0                   | 0                    |
| <b>seq683</b> | Firmicutes    | Clostridia   | 0                   | 8                    | 0                   | 0                    |
| <b>seq690</b> | Firmicutes    | Clostridia   | 0                   | 0                    | 0                   | 0                    |
| <b>seq701</b> | Firmicutes    | Clostridia   | 0                   | 0                    | 0                   | 0                    |
| <b>seq728</b> | Firmicutes    | Clostridia   | 0                   | 25                   | 35                  | 25                   |
| <b>seq736</b> | Firmicutes    | Clostridia   | 0                   | 0                    | 0                   | 10                   |
| <b>seq764</b> | Firmicutes    | Clostridia   | 0                   | 0                    | 0                   | 0                    |
| <b>seq768</b> | Firmicutes    | Clostridia   | 0                   | 0                    | 0                   | 0                    |
| <b>seq773</b> | Firmicutes    | Clostridia   | 0                   | 0                    | 0                   | 0                    |
| <b>seq789</b> | Firmicutes    | Clostridia   | 0                   | 0                    | 0                   | 0                    |
| <b>seq805</b> | Firmicutes    | Clostridia   | 0                   | 0                    | 0                   | 0                    |
| <b>seq828</b> | Firmicutes    | Clostridia   | 0                   | 0                    | 0                   | 0                    |
| <b>seq846</b> | Firmicutes    | Clostridia   | 0                   | 6                    | 0                   | 0                    |
| <b>seq853</b> | Firmicutes    | Clostridia   | 0                   | 0                    | 0                   | 0                    |
| <b>seq859</b> | Firmicutes    | Clostridia   | 0                   | 8                    | 0                   | 0                    |
| <b>seq861</b> | Firmicutes    | Clostridia   | 0                   | 0                    | 0                   | 0                    |
| <b>seq869</b> | Firmicutes    | Clostridia   | 0                   | 12                   | 0                   | 0                    |
| <b>seq894</b> | Firmicutes    | Clostridia   | 0                   | 0                    | 0                   | 0                    |
| <b>seq909</b> | Firmicutes    | Clostridia   | 0                   | 0                    | 0                   | 0                    |

Sequence Count Table

|               | <b>Phylum</b> | <b>Class</b> | <b>Subject11WK0</b> | <b>Subject11WK12</b> | <b>Subject12WK0</b> | <b>Subject12WK12</b> |
|---------------|---------------|--------------|---------------------|----------------------|---------------------|----------------------|
| <b>seq523</b> | Firmicutes    | Clostridia   | 0                   | 0                    | 0                   | 0                    |
| <b>seq525</b> | Firmicutes    | Clostridia   | 0                   | 0                    | 0                   | 0                    |
| <b>seq535</b> | Firmicutes    | Clostridia   | 0                   | 0                    | 0                   | 0                    |
| <b>seq573</b> | Firmicutes    | Clostridia   | 39                  | 4                    | 6                   | 0                    |
| <b>seq582</b> | Firmicutes    | Clostridia   | 0                   | 0                    | 134                 | 46                   |
| <b>seq584</b> | Firmicutes    | Clostridia   | 0                   | 0                    | 0                   | 0                    |
| <b>seq589</b> | Firmicutes    | Clostridia   | 0                   | 0                    | 0                   | 0                    |
| <b>seq600</b> | Firmicutes    | Clostridia   | 0                   | 0                    | 0                   | 0                    |
| <b>seq609</b> | Firmicutes    | Clostridia   | 0                   | 0                    | 0                   | 0                    |
| <b>seq616</b> | Firmicutes    | Clostridia   | 0                   | 0                    | 0                   | 0                    |
| <b>seq621</b> | Firmicutes    | Clostridia   | 0                   | 0                    | 0                   | 0                    |
| <b>seq634</b> | Firmicutes    | Clostridia   | 0                   | 0                    | 0                   | 0                    |
| <b>seq651</b> | Firmicutes    | Clostridia   | 0                   | 0                    | 0                   | 0                    |
| <b>seq669</b> | Firmicutes    | Clostridia   | 0                   | 0                    | 0                   | 0                    |
| <b>seq683</b> | Firmicutes    | Clostridia   | 0                   | 0                    | 0                   | 0                    |
| <b>seq690</b> | Firmicutes    | Clostridia   | 0                   | 0                    | 0                   | 0                    |
| <b>seq701</b> | Firmicutes    | Clostridia   | 0                   | 0                    | 0                   | 0                    |
| <b>seq728</b> | Firmicutes    | Clostridia   | 0                   | 0                    | 0                   | 0                    |
| <b>seq736</b> | Firmicutes    | Clostridia   | 0                   | 0                    | 0                   | 0                    |
| <b>seq764</b> | Firmicutes    | Clostridia   | 0                   | 0                    | 0                   | 0                    |
| <b>seq768</b> | Firmicutes    | Clostridia   | 0                   | 0                    | 0                   | 0                    |
| <b>seq773</b> | Firmicutes    | Clostridia   | 0                   | 0                    | 0                   | 0                    |
| <b>seq789</b> | Firmicutes    | Clostridia   | 0                   | 0                    | 0                   | 0                    |
| <b>seq805</b> | Firmicutes    | Clostridia   | 0                   | 0                    | 0                   | 0                    |
| <b>seq828</b> | Firmicutes    | Clostridia   | 0                   | 0                    | 0                   | 0                    |
| <b>seq846</b> | Firmicutes    | Clostridia   | 0                   | 0                    | 0                   | 0                    |
| <b>seq853</b> | Firmicutes    | Clostridia   | 0                   | 0                    | 0                   | 0                    |
| <b>seq859</b> | Firmicutes    | Clostridia   | 25                  | 0                    | 0                   | 0                    |
| <b>seq861</b> | Firmicutes    | Clostridia   | 0                   | 0                    | 0                   | 0                    |
| <b>seq869</b> | Firmicutes    | Clostridia   | 10                  | 0                    | 0                   | 0                    |
| <b>seq894</b> | Firmicutes    | Clostridia   | 0                   | 0                    | 0                   | 0                    |
| <b>seq909</b> | Firmicutes    | Clostridia   | 0                   | 0                    | 0                   | 0                    |

Sequence Count Table

|               | <b>Phylum</b> | <b>Class</b> | <b>Subject25WK0</b> | <b>Subject25WK12</b> | <b>Subject38WK0</b> | <b>Subject38WK12</b> |
|---------------|---------------|--------------|---------------------|----------------------|---------------------|----------------------|
| <b>seq523</b> | Firmicutes    | Clostridia   | 0                   | 0                    | 0                   | 0                    |
| <b>seq525</b> | Firmicutes    | Clostridia   | 0                   | 0                    | 0                   | 0                    |
| <b>seq535</b> | Firmicutes    | Clostridia   | 0                   | 0                    | 0                   | 0                    |
| <b>seq573</b> | Firmicutes    | Clostridia   | 0                   | 0                    | 0                   | 0                    |
| <b>seq582</b> | Firmicutes    | Clostridia   | 0                   | 0                    | 0                   | 0                    |
| <b>seq584</b> | Firmicutes    | Clostridia   | 0                   | 0                    | 0                   | 0                    |
| <b>seq589</b> | Firmicutes    | Clostridia   | 0                   | 0                    | 0                   | 0                    |
| <b>seq600</b> | Firmicutes    | Clostridia   | 0                   | 0                    | 0                   | 0                    |
| <b>seq609</b> | Firmicutes    | Clostridia   | 0                   | 0                    | 0                   | 0                    |
| <b>seq616</b> | Firmicutes    | Clostridia   | 22                  | 0                    | 0                   | 0                    |
| <b>seq621</b> | Firmicutes    | Clostridia   | 95                  | 20                   | 0                   | 0                    |
| <b>seq634</b> | Firmicutes    | Clostridia   | 0                   | 0                    | 0                   | 0                    |
| <b>seq651</b> | Firmicutes    | Clostridia   | 0                   | 0                    | 0                   | 0                    |
| <b>seq669</b> | Firmicutes    | Clostridia   | 0                   | 0                    | 0                   | 0                    |
| <b>seq683</b> | Firmicutes    | Clostridia   | 101                 | 0                    | 0                   | 0                    |
| <b>seq690</b> | Firmicutes    | Clostridia   | 0                   | 0                    | 0                   | 0                    |
| <b>seq701</b> | Firmicutes    | Clostridia   | 0                   | 0                    | 0                   | 0                    |
| <b>seq728</b> | Firmicutes    | Clostridia   | 0                   | 0                    | 0                   | 0                    |
| <b>seq736</b> | Firmicutes    | Clostridia   | 122                 | 0                    | 0                   | 0                    |
| <b>seq764</b> | Firmicutes    | Clostridia   | 0                   | 0                    | 0                   | 0                    |
| <b>seq768</b> | Firmicutes    | Clostridia   | 0                   | 0                    | 0                   | 0                    |
| <b>seq773</b> | Firmicutes    | Clostridia   | 0                   | 0                    | 0                   | 0                    |
| <b>seq789</b> | Firmicutes    | Clostridia   | 0                   | 0                    | 0                   | 0                    |
| <b>seq805</b> | Firmicutes    | Clostridia   | 0                   | 0                    | 0                   | 0                    |
| <b>seq828</b> | Firmicutes    | Clostridia   | 0                   | 0                    | 0                   | 0                    |
| <b>seq846</b> | Firmicutes    | Clostridia   | 88                  | 43                   | 0                   | 0                    |
| <b>seq853</b> | Firmicutes    | Clostridia   | 0                   | 0                    | 0                   | 0                    |
| <b>seq859</b> | Firmicutes    | Clostridia   | 0                   | 0                    | 0                   | 0                    |
| <b>seq861</b> | Firmicutes    | Clostridia   | 9                   | 10                   | 0                   | 0                    |
| <b>seq869</b> | Firmicutes    | Clostridia   | 0                   | 0                    | 0                   | 0                    |
| <b>seq894</b> | Firmicutes    | Clostridia   | 0                   | 0                    | 0                   | 0                    |
| <b>seq909</b> | Firmicutes    | Clostridia   | 24                  | 0                    | 0                   | 0                    |

Sequence Count Table

|               | <b>Phylum</b> | <b>Class</b> | <b>Subject31WK0</b> | <b>Subject31WK12</b> | <b>Subject32WK0</b> | <b>Subject32WK12</b> |
|---------------|---------------|--------------|---------------------|----------------------|---------------------|----------------------|
| <b>seq523</b> | Firmicutes    | Clostridia   | 0                   | 0                    | 0                   | 0                    |
| <b>seq525</b> | Firmicutes    | Clostridia   | 0                   | 0                    | 0                   | 0                    |
| <b>seq535</b> | Firmicutes    | Clostridia   | 0                   | 0                    | 0                   | 0                    |
| <b>seq573</b> | Firmicutes    | Clostridia   | 0                   | 0                    | 11                  | 0                    |
| <b>seq582</b> | Firmicutes    | Clostridia   | 0                   | 0                    | 0                   | 0                    |
| <b>seq584</b> | Firmicutes    | Clostridia   | 0                   | 0                    | 0                   | 0                    |
| <b>seq589</b> | Firmicutes    | Clostridia   | 0                   | 0                    | 0                   | 0                    |
| <b>seq600</b> | Firmicutes    | Clostridia   | 0                   | 0                    | 0                   | 0                    |
| <b>seq609</b> | Firmicutes    | Clostridia   | 0                   | 0                    | 0                   | 0                    |
| <b>seq616</b> | Firmicutes    | Clostridia   | 0                   | 0                    | 0                   | 0                    |
| <b>seq621</b> | Firmicutes    | Clostridia   | 0                   | 0                    | 0                   | 0                    |
| <b>seq634</b> | Firmicutes    | Clostridia   | 0                   | 0                    | 0                   | 0                    |
| <b>seq651</b> | Firmicutes    | Clostridia   | 0                   | 0                    | 0                   | 0                    |
| <b>seq669</b> | Firmicutes    | Clostridia   | 0                   | 0                    | 0                   | 0                    |
| <b>seq683</b> | Firmicutes    | Clostridia   | 0                   | 0                    | 0                   | 0                    |
| <b>seq690</b> | Firmicutes    | Clostridia   | 0                   | 0                    | 0                   | 0                    |
| <b>seq701</b> | Firmicutes    | Clostridia   | 0                   | 0                    | 0                   | 0                    |
| <b>seq728</b> | Firmicutes    | Clostridia   | 0                   | 0                    | 0                   | 0                    |
| <b>seq736</b> | Firmicutes    | Clostridia   | 0                   | 0                    | 0                   | 0                    |
| <b>seq764</b> | Firmicutes    | Clostridia   | 0                   | 0                    | 0                   | 0                    |
| <b>seq768</b> | Firmicutes    | Clostridia   | 0                   | 0                    | 0                   | 0                    |
| <b>seq773</b> | Firmicutes    | Clostridia   | 0                   | 0                    | 0                   | 0                    |
| <b>seq789</b> | Firmicutes    | Clostridia   | 0                   | 0                    | 0                   | 0                    |
| <b>seq805</b> | Firmicutes    | Clostridia   | 0                   | 0                    | 0                   | 0                    |
| <b>seq828</b> | Firmicutes    | Clostridia   | 0                   | 0                    | 0                   | 0                    |
| <b>seq846</b> | Firmicutes    | Clostridia   | 0                   | 0                    | 0                   | 0                    |
| <b>seq853</b> | Firmicutes    | Clostridia   | 0                   | 0                    | 0                   | 0                    |
| <b>seq859</b> | Firmicutes    | Clostridia   | 0                   | 0                    | 0                   | 0                    |
| <b>seq861</b> | Firmicutes    | Clostridia   | 0                   | 0                    | 0                   | 0                    |
| <b>seq869</b> | Firmicutes    | Clostridia   | 0                   | 0                    | 0                   | 0                    |
| <b>seq894</b> | Firmicutes    | Clostridia   | 0                   | 0                    | 0                   | 0                    |
| <b>seq909</b> | Firmicutes    | Clostridia   | 0                   | 0                    | 0                   | 0                    |

Sequence Count Table

|               | <b>Phylum</b> | <b>Class</b> | <b>Subject13WK0</b> | <b>Subject13WK12</b> | <b>Subject39WK0</b> | <b>Subject39WK12</b> |
|---------------|---------------|--------------|---------------------|----------------------|---------------------|----------------------|
| <b>seq523</b> | Firmicutes    | Clostridia   | 0                   | 0                    | 0                   | 0                    |
| <b>seq525</b> | Firmicutes    | Clostridia   | 0                   | 0                    | 0                   | 0                    |
| <b>seq535</b> | Firmicutes    | Clostridia   | 0                   | 0                    | 0                   | 0                    |
| <b>seq573</b> | Firmicutes    | Clostridia   | 0                   | 0                    | 0                   | 0                    |
| <b>seq582</b> | Firmicutes    | Clostridia   | 16                  | 0                    | 0                   | 0                    |
| <b>seq584</b> | Firmicutes    | Clostridia   | 0                   | 0                    | 0                   | 0                    |
| <b>seq589</b> | Firmicutes    | Clostridia   | 0                   | 0                    | 0                   | 25                   |
| <b>seq600</b> | Firmicutes    | Clostridia   | 65                  | 37                   | 0                   | 0                    |
| <b>seq609</b> | Firmicutes    | Clostridia   | 0                   | 0                    | 0                   | 0                    |
| <b>seq616</b> | Firmicutes    | Clostridia   | 0                   | 0                    | 0                   | 0                    |
| <b>seq621</b> | Firmicutes    | Clostridia   | 37                  | 0                    | 0                   | 0                    |
| <b>seq634</b> | Firmicutes    | Clostridia   | 0                   | 0                    | 0                   | 0                    |
| <b>seq651</b> | Firmicutes    | Clostridia   | 0                   | 0                    | 0                   | 0                    |
| <b>seq669</b> | Firmicutes    | Clostridia   | 0                   | 0                    | 0                   | 0                    |
| <b>seq683</b> | Firmicutes    | Clostridia   | 0                   | 0                    | 0                   | 0                    |
| <b>seq690</b> | Firmicutes    | Clostridia   | 0                   | 0                    | 0                   | 0                    |
| <b>seq701</b> | Firmicutes    | Clostridia   | 0                   | 300                  | 0                   | 0                    |
| <b>seq728</b> | Firmicutes    | Clostridia   | 19                  | 45                   | 0                   | 0                    |
| <b>seq736</b> | Firmicutes    | Clostridia   | 16                  | 0                    | 0                   | 0                    |
| <b>seq764</b> | Firmicutes    | Clostridia   | 30                  | 45                   | 0                   | 0                    |
| <b>seq768</b> | Firmicutes    | Clostridia   | 0                   | 0                    | 0                   | 0                    |
| <b>seq773</b> | Firmicutes    | Clostridia   | 0                   | 0                    | 0                   | 0                    |
| <b>seq789</b> | Firmicutes    | Clostridia   | 126                 | 24                   | 0                   | 0                    |
| <b>seq805</b> | Firmicutes    | Clostridia   | 0                   | 0                    | 0                   | 0                    |
| <b>seq828</b> | Firmicutes    | Clostridia   | 0                   | 0                    | 0                   | 0                    |
| <b>seq846</b> | Firmicutes    | Clostridia   | 0                   | 0                    | 0                   | 0                    |
| <b>seq853</b> | Firmicutes    | Clostridia   | 144                 | 79                   | 0                   | 0                    |
| <b>seq859</b> | Firmicutes    | Clostridia   | 6                   | 9                    | 0                   | 0                    |
| <b>seq861</b> | Firmicutes    | Clostridia   | 0                   | 0                    | 0                   | 0                    |
| <b>seq869</b> | Firmicutes    | Clostridia   | 0                   | 0                    | 0                   | 0                    |
| <b>seq894</b> | Firmicutes    | Clostridia   | 0                   | 0                    | 0                   | 0                    |
| <b>seq909</b> | Firmicutes    | Clostridia   | 0                   | 11                   | 0                   | 0                    |

Sequence Count Table

|               | <b>Phylum</b> | <b>Class</b> | <b>Subject26WK0</b> | <b>Subject26WK12</b> | <b>Subject14WK0</b> | <b>Subject14WK12</b> |
|---------------|---------------|--------------|---------------------|----------------------|---------------------|----------------------|
| <b>seq523</b> | Firmicutes    | Clostridia   | 0                   | 0                    | 0                   | 0                    |
| <b>seq525</b> | Firmicutes    | Clostridia   | 0                   | 0                    | 0                   | 0                    |
| <b>seq535</b> | Firmicutes    | Clostridia   | 0                   | 0                    | 0                   | 0                    |
| <b>seq573</b> | Firmicutes    | Clostridia   | 42                  | 27                   | 0                   | 0                    |
| <b>seq582</b> | Firmicutes    | Clostridia   | 0                   | 0                    | 0                   | 16                   |
| <b>seq584</b> | Firmicutes    | Clostridia   | 0                   | 0                    | 0                   | 0                    |
| <b>seq589</b> | Firmicutes    | Clostridia   | 0                   | 0                    | 0                   | 0                    |
| <b>seq600</b> | Firmicutes    | Clostridia   | 0                   | 0                    | 0                   | 0                    |
| <b>seq609</b> | Firmicutes    | Clostridia   | 0                   | 0                    | 0                   | 0                    |
| <b>seq616</b> | Firmicutes    | Clostridia   | 269                 | 30                   | 0                   | 0                    |
| <b>seq621</b> | Firmicutes    | Clostridia   | 0                   | 0                    | 94                  | 146                  |
| <b>seq634</b> | Firmicutes    | Clostridia   | 0                   | 0                    | 0                   | 0                    |
| <b>seq651</b> | Firmicutes    | Clostridia   | 0                   | 0                    | 0                   | 0                    |
| <b>seq669</b> | Firmicutes    | Clostridia   | 0                   | 0                    | 0                   | 0                    |
| <b>seq683</b> | Firmicutes    | Clostridia   | 0                   | 0                    | 0                   | 0                    |
| <b>seq690</b> | Firmicutes    | Clostridia   | 0                   | 0                    | 0                   | 0                    |
| <b>seq701</b> | Firmicutes    | Clostridia   | 0                   | 0                    | 0                   | 0                    |
| <b>seq728</b> | Firmicutes    | Clostridia   | 0                   | 0                    | 0                   | 0                    |
| <b>seq736</b> | Firmicutes    | Clostridia   | 0                   | 0                    | 0                   | 0                    |
| <b>seq764</b> | Firmicutes    | Clostridia   | 0                   | 0                    | 0                   | 0                    |
| <b>seq768</b> | Firmicutes    | Clostridia   | 0                   | 0                    | 0                   | 0                    |
| <b>seq773</b> | Firmicutes    | Clostridia   | 12                  | 71                   | 0                   | 0                    |
| <b>seq789</b> | Firmicutes    | Clostridia   | 0                   | 0                    | 0                   | 0                    |
| <b>seq805</b> | Firmicutes    | Clostridia   | 0                   | 0                    | 0                   | 0                    |
| <b>seq828</b> | Firmicutes    | Clostridia   | 0                   | 96                   | 0                   | 21                   |
| <b>seq846</b> | Firmicutes    | Clostridia   | 0                   | 0                    | 0                   | 0                    |
| <b>seq853</b> | Firmicutes    | Clostridia   | 0                   | 0                    | 0                   | 0                    |
| <b>seq859</b> | Firmicutes    | Clostridia   | 0                   | 18                   | 0                   | 14                   |
| <b>seq861</b> | Firmicutes    | Clostridia   | 0                   | 0                    | 0                   | 0                    |
| <b>seq869</b> | Firmicutes    | Clostridia   | 0                   | 0                    | 0                   | 0                    |
| <b>seq894</b> | Firmicutes    | Clostridia   | 0                   | 0                    | 0                   | 0                    |
| <b>seq909</b> | Firmicutes    | Clostridia   | 0                   | 0                    | 10                  | 18                   |

Sequence Count Table

|               | <b>Phylum</b> | <b>Class</b> | <b>Subject27WK0</b> | <b>Subject27WK12</b> | <b>Subject15WK0</b> | <b>Subject15WK12</b> |
|---------------|---------------|--------------|---------------------|----------------------|---------------------|----------------------|
| <b>seq523</b> | Firmicutes    | Clostridia   | 0                   | 0                    | 0                   | 0                    |
| <b>seq525</b> | Firmicutes    | Clostridia   | 0                   | 0                    | 0                   | 0                    |
| <b>seq535</b> | Firmicutes    | Clostridia   | 0                   | 0                    | 0                   | 0                    |
| <b>seq573</b> | Firmicutes    | Clostridia   | 0                   | 0                    | 0                   | 0                    |
| <b>seq582</b> | Firmicutes    | Clostridia   | 0                   | 0                    | 32                  | 0                    |
| <b>seq584</b> | Firmicutes    | Clostridia   | 0                   | 0                    | 0                   | 0                    |
| <b>seq589</b> | Firmicutes    | Clostridia   | 0                   | 0                    | 28                  | 24                   |
| <b>seq600</b> | Firmicutes    | Clostridia   | 0                   | 0                    | 0                   | 0                    |
| <b>seq609</b> | Firmicutes    | Clostridia   | 0                   | 0                    | 0                   | 0                    |
| <b>seq616</b> | Firmicutes    | Clostridia   | 14                  | 0                    | 0                   | 0                    |
| <b>seq621</b> | Firmicutes    | Clostridia   | 0                   | 0                    | 0                   | 0                    |
| <b>seq634</b> | Firmicutes    | Clostridia   | 0                   | 0                    | 0                   | 0                    |
| <b>seq651</b> | Firmicutes    | Clostridia   | 0                   | 0                    | 0                   | 0                    |
| <b>seq669</b> | Firmicutes    | Clostridia   | 0                   | 0                    | 0                   | 0                    |
| <b>seq683</b> | Firmicutes    | Clostridia   | 0                   | 0                    | 0                   | 0                    |
| <b>seq690</b> | Firmicutes    | Clostridia   | 0                   | 0                    | 0                   | 0                    |
| <b>seq701</b> | Firmicutes    | Clostridia   | 0                   | 0                    | 0                   | 0                    |
| <b>seq728</b> | Firmicutes    | Clostridia   | 0                   | 0                    | 0                   | 0                    |
| <b>seq736</b> | Firmicutes    | Clostridia   | 0                   | 0                    | 0                   | 0                    |
| <b>seq764</b> | Firmicutes    | Clostridia   | 0                   | 0                    | 0                   | 0                    |
| <b>seq768</b> | Firmicutes    | Clostridia   | 0                   | 0                    | 10                  | 70                   |
| <b>seq773</b> | Firmicutes    | Clostridia   | 113                 | 28                   | 0                   | 0                    |
| <b>seq789</b> | Firmicutes    | Clostridia   | 0                   | 0                    | 0                   | 0                    |
| <b>seq805</b> | Firmicutes    | Clostridia   | 0                   | 0                    | 0                   | 0                    |
| <b>seq828</b> | Firmicutes    | Clostridia   | 0                   | 0                    | 0                   | 0                    |
| <b>seq846</b> | Firmicutes    | Clostridia   | 0                   | 0                    | 0                   | 0                    |
| <b>seq853</b> | Firmicutes    | Clostridia   | 0                   | 0                    | 0                   | 0                    |
| <b>seq859</b> | Firmicutes    | Clostridia   | 0                   | 0                    | 0                   | 0                    |
| <b>seq861</b> | Firmicutes    | Clostridia   | 0                   | 0                    | 0                   | 0                    |
| <b>seq869</b> | Firmicutes    | Clostridia   | 0                   | 0                    | 0                   | 0                    |
| <b>seq894</b> | Firmicutes    | Clostridia   | 0                   | 0                    | 0                   | 0                    |
| <b>seq909</b> | Firmicutes    | Clostridia   | 0                   | 0                    | 0                   | 0                    |



Sequence Count Table

|               | <b>Phylum</b> | <b>Class</b> | <b>Δ</b> |  |  |  |
|---------------|---------------|--------------|----------|--|--|--|
| <b>seq523</b> | Firmicutes    | Clostridia   |          |  |  |  |
| <b>seq525</b> | Firmicutes    | Clostridia   |          |  |  |  |
| <b>seq535</b> | Firmicutes    | Clostridia   |          |  |  |  |
| <b>seq573</b> | Firmicutes    | Clostridia   |          |  |  |  |
| <b>seq582</b> | Firmicutes    | Clostridia   |          |  |  |  |
| <b>seq584</b> | Firmicutes    | Clostridia   |          |  |  |  |
| <b>seq589</b> | Firmicutes    | Clostridia   |          |  |  |  |
| <b>seq600</b> | Firmicutes    | Clostridia   |          |  |  |  |
| <b>seq609</b> | Firmicutes    | Clostridia   |          |  |  |  |
| <b>seq616</b> | Firmicutes    | Clostridia   |          |  |  |  |
| <b>seq621</b> | Firmicutes    | Clostridia   |          |  |  |  |
| <b>seq634</b> | Firmicutes    | Clostridia   |          |  |  |  |
| <b>seq651</b> | Firmicutes    | Clostridia   |          |  |  |  |
| <b>seq669</b> | Firmicutes    | Clostridia   |          |  |  |  |
| <b>seq683</b> | Firmicutes    | Clostridia   |          |  |  |  |
| <b>seq690</b> | Firmicutes    | Clostridia   |          |  |  |  |
| <b>seq701</b> | Firmicutes    | Clostridia   |          |  |  |  |
| <b>seq728</b> | Firmicutes    | Clostridia   |          |  |  |  |
| <b>seq736</b> | Firmicutes    | Clostridia   |          |  |  |  |
| <b>seq764</b> | Firmicutes    | Clostridia   |          |  |  |  |
| <b>seq768</b> | Firmicutes    | Clostridia   |          |  |  |  |
| <b>seq773</b> | Firmicutes    | Clostridia   |          |  |  |  |
| <b>seq789</b> | Firmicutes    | Clostridia   |          |  |  |  |
| <b>seq805</b> | Firmicutes    | Clostridia   |          |  |  |  |
| <b>seq828</b> | Firmicutes    | Clostridia   |          |  |  |  |
| <b>seq846</b> | Firmicutes    | Clostridia   |          |  |  |  |
| <b>seq853</b> | Firmicutes    | Clostridia   |          |  |  |  |
| <b>seq859</b> | Firmicutes    | Clostridia   |          |  |  |  |
| <b>seq861</b> | Firmicutes    | Clostridia   |          |  |  |  |
| <b>seq869</b> | Firmicutes    | Clostridia   |          |  |  |  |
| <b>seq894</b> | Firmicutes    | Clostridia   |          |  |  |  |
| <b>seq909</b> | Firmicutes    | Clostridia   |          |  |  |  |

Sequence Count Table

|                | <b>Phylum</b> | <b>Class</b> | <b>Order</b>  | <b>Family</b>   |
|----------------|---------------|--------------|---------------|-----------------|
| <b>seq929</b>  | Firmicutes    | Clostridia   | Clostridiales | Ruminococcaceae |
| <b>seq930</b>  | Firmicutes    | Clostridia   | Clostridiales | Ruminococcaceae |
| <b>seq937</b>  | Firmicutes    | Clostridia   | Clostridiales | Ruminococcaceae |
| <b>seq942</b>  | Firmicutes    | Clostridia   | Clostridiales | Ruminococcaceae |
| <b>seq973</b>  | Firmicutes    | Clostridia   | Clostridiales | Ruminococcaceae |
| <b>seq987</b>  | Firmicutes    | Clostridia   | Clostridiales | Ruminococcaceae |
| <b>seq988</b>  | Firmicutes    | Clostridia   | Clostridiales | Ruminococcaceae |
| <b>seq994</b>  | Firmicutes    | Clostridia   | Clostridiales | Ruminococcaceae |
| <b>seq1005</b> | Firmicutes    | Clostridia   | Clostridiales | Ruminococcaceae |
| <b>seq1013</b> | Firmicutes    | Clostridia   | Clostridiales | Ruminococcaceae |
| <b>seq1021</b> | Firmicutes    | Clostridia   | Clostridiales | Ruminococcaceae |
| <b>seq1025</b> | Firmicutes    | Clostridia   | Clostridiales | Ruminococcaceae |
| <b>seq1031</b> | Firmicutes    | Clostridia   | Clostridiales | Ruminococcaceae |
| <b>seq1054</b> | Firmicutes    | Clostridia   | Clostridiales | Ruminococcaceae |
| <b>seq1065</b> | Firmicutes    | Clostridia   | Clostridiales | Ruminococcaceae |
| <b>seq1097</b> | Firmicutes    | Clostridia   | Clostridiales | Ruminococcaceae |
| <b>seq1100</b> | Firmicutes    | Clostridia   | Clostridiales | Ruminococcaceae |
| <b>seq1101</b> | Firmicutes    | Clostridia   | Clostridiales | Ruminococcaceae |
| <b>seq1115</b> | Firmicutes    | Clostridia   | Clostridiales | Ruminococcaceae |
| <b>seq1128</b> | Firmicutes    | Clostridia   | Clostridiales | Ruminococcaceae |
| <b>seq1130</b> | Firmicutes    | Clostridia   | Clostridiales | Ruminococcaceae |
| <b>seq1134</b> | Firmicutes    | Clostridia   | Clostridiales | Ruminococcaceae |
| <b>seq1138</b> | Firmicutes    | Clostridia   | Clostridiales | Ruminococcaceae |
| <b>seq1148</b> | Firmicutes    | Clostridia   | Clostridiales | Ruminococcaceae |
| <b>seq1149</b> | Firmicutes    | Clostridia   | Clostridiales | Ruminococcaceae |
| <b>seq1152</b> | Firmicutes    | Clostridia   | Clostridiales | Ruminococcaceae |
| <b>seq1157</b> | Firmicutes    | Clostridia   | Clostridiales | Ruminococcaceae |
| <b>seq1167</b> | Firmicutes    | Clostridia   | Clostridiales | Ruminococcaceae |
| <b>seq1199</b> | Firmicutes    | Clostridia   | Clostridiales | Ruminococcaceae |
| <b>seq1205</b> | Firmicutes    | Clostridia   | Clostridiales | Ruminococcaceae |
| <b>seq1230</b> | Firmicutes    | Clostridia   | Clostridiales | Ruminococcaceae |
| <b>seq1245</b> | Firmicutes    | Clostridia   | Clostridiales | Ruminococcaceae |

Sequence Count Table

|                | <b>Phylum</b> | <b>Class</b> | <b>Genus</b> | <b>Species</b> |
|----------------|---------------|--------------|--------------|----------------|
| <b>seq929</b>  | Firmicutes    | Clostridia   |              |                |
| <b>seq930</b>  | Firmicutes    | Clostridia   |              |                |
| <b>seq937</b>  | Firmicutes    | Clostridia   |              |                |
| <b>seq942</b>  | Firmicutes    | Clostridia   |              |                |
| <b>seq973</b>  | Firmicutes    | Clostridia   |              |                |
| <b>seq987</b>  | Firmicutes    | Clostridia   |              |                |
| <b>seq988</b>  | Firmicutes    | Clostridia   |              |                |
| <b>seq994</b>  | Firmicutes    | Clostridia   |              |                |
| <b>seq1005</b> | Firmicutes    | Clostridia   |              |                |
| <b>seq1013</b> | Firmicutes    | Clostridia   |              |                |
| <b>seq1021</b> | Firmicutes    | Clostridia   |              |                |
| <b>seq1025</b> | Firmicutes    | Clostridia   |              |                |
| <b>seq1031</b> | Firmicutes    | Clostridia   |              |                |
| <b>seq1054</b> | Firmicutes    | Clostridia   |              |                |
| <b>seq1065</b> | Firmicutes    | Clostridia   |              |                |
| <b>seq1097</b> | Firmicutes    | Clostridia   |              |                |
| <b>seq1100</b> | Firmicutes    | Clostridia   |              |                |
| <b>seq1101</b> | Firmicutes    | Clostridia   |              |                |
| <b>seq1115</b> | Firmicutes    | Clostridia   |              |                |
| <b>seq1128</b> | Firmicutes    | Clostridia   |              |                |
| <b>seq1130</b> | Firmicutes    | Clostridia   |              |                |
| <b>seq1134</b> | Firmicutes    | Clostridia   |              |                |
| <b>seq1138</b> | Firmicutes    | Clostridia   |              |                |
| <b>seq1148</b> | Firmicutes    | Clostridia   |              |                |
| <b>seq1149</b> | Firmicutes    | Clostridia   |              |                |
| <b>seq1152</b> | Firmicutes    | Clostridia   |              |                |
| <b>seq1157</b> | Firmicutes    | Clostridia   |              |                |
| <b>seq1167</b> | Firmicutes    | Clostridia   |              |                |
| <b>seq1199</b> | Firmicutes    | Clostridia   |              |                |
| <b>seq1205</b> | Firmicutes    | Clostridia   |              |                |
| <b>seq1230</b> | Firmicutes    | Clostridia   |              |                |
| <b>seq1245</b> | Firmicutes    | Clostridia   |              |                |

Sequence Count Table

|                | <b>Phylum</b> | <b>Class</b> | <b>Subject34WK0</b> | <b>Subject34WK12</b> | <b>Subject16WK0</b> | <b>Subject16WK12</b> |
|----------------|---------------|--------------|---------------------|----------------------|---------------------|----------------------|
| <b>seq929</b>  | Firmicutes    | Clostridia   | 0                   | 0                    | 0                   | 0                    |
| <b>seq930</b>  | Firmicutes    | Clostridia   | 0                   | 0                    | 0                   | 0                    |
| <b>seq937</b>  | Firmicutes    | Clostridia   | 0                   | 0                    | 0                   | 0                    |
| <b>seq942</b>  | Firmicutes    | Clostridia   | 0                   | 0                    | 0                   | 0                    |
| <b>seq973</b>  | Firmicutes    | Clostridia   | 0                   | 0                    | 0                   | 0                    |
| <b>seq987</b>  | Firmicutes    | Clostridia   | 0                   | 0                    | 15                  | 32                   |
| <b>seq988</b>  | Firmicutes    | Clostridia   | 0                   | 0                    | 0                   | 0                    |
| <b>seq994</b>  | Firmicutes    | Clostridia   | 0                   | 0                    | 0                   | 0                    |
| <b>seq1005</b> | Firmicutes    | Clostridia   | 0                   | 0                    | 0                   | 0                    |
| <b>seq1013</b> | Firmicutes    | Clostridia   | 0                   | 0                    | 0                   | 0                    |
| <b>seq1021</b> | Firmicutes    | Clostridia   | 0                   | 0                    | 0                   | 0                    |
| <b>seq1025</b> | Firmicutes    | Clostridia   | 0                   | 0                    | 0                   | 0                    |
| <b>seq1031</b> | Firmicutes    | Clostridia   | 0                   | 0                    | 0                   | 15                   |
| <b>seq1054</b> | Firmicutes    | Clostridia   | 0                   | 0                    | 0                   | 0                    |
| <b>seq1065</b> | Firmicutes    | Clostridia   | 0                   | 0                    | 0                   | 0                    |
| <b>seq1097</b> | Firmicutes    | Clostridia   | 0                   | 0                    | 0                   | 0                    |
| <b>seq1100</b> | Firmicutes    | Clostridia   | 0                   | 0                    | 0                   | 0                    |
| <b>seq1101</b> | Firmicutes    | Clostridia   | 0                   | 0                    | 30                  | 0                    |
| <b>seq1115</b> | Firmicutes    | Clostridia   | 0                   | 0                    | 0                   | 0                    |
| <b>seq1128</b> | Firmicutes    | Clostridia   | 0                   | 0                    | 0                   | 0                    |
| <b>seq1130</b> | Firmicutes    | Clostridia   | 0                   | 0                    | 0                   | 0                    |
| <b>seq1134</b> | Firmicutes    | Clostridia   | 0                   | 0                    | 0                   | 0                    |
| <b>seq1138</b> | Firmicutes    | Clostridia   | 0                   | 0                    | 0                   | 0                    |
| <b>seq1148</b> | Firmicutes    | Clostridia   | 0                   | 0                    | 0                   | 0                    |
| <b>seq1149</b> | Firmicutes    | Clostridia   | 0                   | 0                    | 0                   | 0                    |
| <b>seq1152</b> | Firmicutes    | Clostridia   | 0                   | 0                    | 0                   | 0                    |
| <b>seq1157</b> | Firmicutes    | Clostridia   | 0                   | 0                    | 0                   | 0                    |
| <b>seq1167</b> | Firmicutes    | Clostridia   | 0                   | 0                    | 0                   | 0                    |
| <b>seq1199</b> | Firmicutes    | Clostridia   | 0                   | 0                    | 0                   | 11                   |
| <b>seq1205</b> | Firmicutes    | Clostridia   | 0                   | 0                    | 0                   | 0                    |
| <b>seq1230</b> | Firmicutes    | Clostridia   | 0                   | 0                    | 0                   | 0                    |
| <b>seq1245</b> | Firmicutes    | Clostridia   | 0                   | 0                    | 0                   | 0                    |

Sequence Count Table

|                | <b>Phylum</b> | <b>Class</b> | <b>Subject17WK0</b> | <b>Subject17WK12</b> | <b>Subject1WK0</b> | <b>Subject1WK12</b> |
|----------------|---------------|--------------|---------------------|----------------------|--------------------|---------------------|
| <b>seq929</b>  | Firmicutes    | Clostridia   | 0                   | 0                    | 0                  | 0                   |
| <b>seq930</b>  | Firmicutes    | Clostridia   | 0                   | 0                    | 0                  | 0                   |
| <b>seq937</b>  | Firmicutes    | Clostridia   | 0                   | 0                    | 0                  | 0                   |
| <b>seq942</b>  | Firmicutes    | Clostridia   | 0                   | 9                    | 9                  | 16                  |
| <b>seq973</b>  | Firmicutes    | Clostridia   | 0                   | 0                    | 83                 | 69                  |
| <b>seq987</b>  | Firmicutes    | Clostridia   | 0                   | 15                   | 0                  | 0                   |
| <b>seq988</b>  | Firmicutes    | Clostridia   | 0                   | 0                    | 0                  | 37                  |
| <b>seq994</b>  | Firmicutes    | Clostridia   | 29                  | 0                    | 0                  | 0                   |
| <b>seq1005</b> | Firmicutes    | Clostridia   | 0                   | 0                    | 0                  | 0                   |
| <b>seq1013</b> | Firmicutes    | Clostridia   | 7                   | 5                    | 0                  | 0                   |
| <b>seq1021</b> | Firmicutes    | Clostridia   | 0                   | 0                    | 0                  | 0                   |
| <b>seq1025</b> | Firmicutes    | Clostridia   | 48                  | 0                    | 0                  | 0                   |
| <b>seq1031</b> | Firmicutes    | Clostridia   | 0                   | 19                   | 0                  | 0                   |
| <b>seq1054</b> | Firmicutes    | Clostridia   | 0                   | 0                    | 0                  | 0                   |
| <b>seq1065</b> | Firmicutes    | Clostridia   | 0                   | 0                    | 0                  | 0                   |
| <b>seq1097</b> | Firmicutes    | Clostridia   | 13                  | 15                   | 0                  | 0                   |
| <b>seq1100</b> | Firmicutes    | Clostridia   | 0                   | 0                    | 0                  | 0                   |
| <b>seq1101</b> | Firmicutes    | Clostridia   | 0                   | 0                    | 0                  | 0                   |
| <b>seq1115</b> | Firmicutes    | Clostridia   | 0                   | 0                    | 0                  | 0                   |
| <b>seq1128</b> | Firmicutes    | Clostridia   | 0                   | 0                    | 19                 | 22                  |
| <b>seq1130</b> | Firmicutes    | Clostridia   | 0                   | 0                    | 0                  | 0                   |
| <b>seq1134</b> | Firmicutes    | Clostridia   | 0                   | 0                    | 0                  | 0                   |
| <b>seq1138</b> | Firmicutes    | Clostridia   | 0                   | 0                    | 0                  | 0                   |
| <b>seq1148</b> | Firmicutes    | Clostridia   | 47                  | 33                   | 0                  | 0                   |
| <b>seq1149</b> | Firmicutes    | Clostridia   | 36                  | 56                   | 0                  | 0                   |
| <b>seq1152</b> | Firmicutes    | Clostridia   | 0                   | 0                    | 0                  | 0                   |
| <b>seq1157</b> | Firmicutes    | Clostridia   | 0                   | 13                   | 0                  | 0                   |
| <b>seq1167</b> | Firmicutes    | Clostridia   | 65                  | 23                   | 0                  | 0                   |
| <b>seq1199</b> | Firmicutes    | Clostridia   | 20                  | 21                   | 0                  | 0                   |
| <b>seq1205</b> | Firmicutes    | Clostridia   | 0                   | 0                    | 0                  | 0                   |
| <b>seq1230</b> | Firmicutes    | Clostridia   | 0                   | 0                    | 0                  | 0                   |
| <b>seq1245</b> | Firmicutes    | Clostridia   | 0                   | 0                    | 0                  | 0                   |

Sequence Count Table

|                | <b>Phylum</b> | <b>Class</b> | <b>Subject2WK0</b> | <b>Subject2WK12</b> | <b>Subject3WK0</b> | <b>Subject3WK12</b> |
|----------------|---------------|--------------|--------------------|---------------------|--------------------|---------------------|
| <b>seq929</b>  | Firmicutes    | Clostridia   | 0                  | 0                   | 0                  | 0                   |
| <b>seq930</b>  | Firmicutes    | Clostridia   | 0                  | 0                   | 0                  | 0                   |
| <b>seq937</b>  | Firmicutes    | Clostridia   | 0                  | 0                   | 0                  | 0                   |
| <b>seq942</b>  | Firmicutes    | Clostridia   | 5                  | 0                   | 0                  | 0                   |
| <b>seq973</b>  | Firmicutes    | Clostridia   | 0                  | 0                   | 0                  | 0                   |
| <b>seq987</b>  | Firmicutes    | Clostridia   | 0                  | 0                   | 0                  | 0                   |
| <b>seq988</b>  | Firmicutes    | Clostridia   | 0                  | 0                   | 0                  | 0                   |
| <b>seq994</b>  | Firmicutes    | Clostridia   | 0                  | 0                   | 0                  | 0                   |
| <b>seq1005</b> | Firmicutes    | Clostridia   | 0                  | 0                   | 0                  | 0                   |
| <b>seq1013</b> | Firmicutes    | Clostridia   | 0                  | 0                   | 0                  | 0                   |
| <b>seq1021</b> | Firmicutes    | Clostridia   | 0                  | 0                   | 0                  | 0                   |
| <b>seq1025</b> | Firmicutes    | Clostridia   | 0                  | 0                   | 0                  | 0                   |
| <b>seq1031</b> | Firmicutes    | Clostridia   | 0                  | 0                   | 0                  | 0                   |
| <b>seq1054</b> | Firmicutes    | Clostridia   | 0                  | 0                   | 0                  | 0                   |
| <b>seq1065</b> | Firmicutes    | Clostridia   | 0                  | 0                   | 116                | 0                   |
| <b>seq1097</b> | Firmicutes    | Clostridia   | 0                  | 0                   | 0                  | 0                   |
| <b>seq1100</b> | Firmicutes    | Clostridia   | 0                  | 0                   | 0                  | 0                   |
| <b>seq1101</b> | Firmicutes    | Clostridia   | 0                  | 0                   | 0                  | 0                   |
| <b>seq1115</b> | Firmicutes    | Clostridia   | 0                  | 0                   | 0                  | 0                   |
| <b>seq1128</b> | Firmicutes    | Clostridia   | 0                  | 0                   | 0                  | 0                   |
| <b>seq1130</b> | Firmicutes    | Clostridia   | 0                  | 0                   | 0                  | 0                   |
| <b>seq1134</b> | Firmicutes    | Clostridia   | 0                  | 0                   | 0                  | 0                   |
| <b>seq1138</b> | Firmicutes    | Clostridia   | 0                  | 0                   | 0                  | 0                   |
| <b>seq1148</b> | Firmicutes    | Clostridia   | 0                  | 0                   | 0                  | 0                   |
| <b>seq1149</b> | Firmicutes    | Clostridia   | 0                  | 0                   | 0                  | 0                   |
| <b>seq1152</b> | Firmicutes    | Clostridia   | 0                  | 0                   | 0                  | 0                   |
| <b>seq1157</b> | Firmicutes    | Clostridia   | 0                  | 0                   | 0                  | 0                   |
| <b>seq1167</b> | Firmicutes    | Clostridia   | 0                  | 0                   | 0                  | 0                   |
| <b>seq1199</b> | Firmicutes    | Clostridia   | 0                  | 0                   | 0                  | 0                   |
| <b>seq1205</b> | Firmicutes    | Clostridia   | 0                  | 0                   | 0                  | 0                   |
| <b>seq1230</b> | Firmicutes    | Clostridia   | 0                  | 0                   | 0                  | 0                   |
| <b>seq1245</b> | Firmicutes    | Clostridia   | 0                  | 0                   | 0                  | 0                   |

Sequence Count Table

|                | <b>Phylum</b> | <b>Class</b> | <b>Subject4WK0</b> | <b>Subject4WK12</b> | <b>Subject5WK0</b> | <b>Subject5WK12</b> |
|----------------|---------------|--------------|--------------------|---------------------|--------------------|---------------------|
| <b>seq929</b>  | Firmicutes    | Clostridia   | 0                  | 0                   | 12                 | 9                   |
| <b>seq930</b>  | Firmicutes    | Clostridia   | 0                  | 0                   | 0                  | 0                   |
| <b>seq937</b>  | Firmicutes    | Clostridia   | 0                  | 0                   | 0                  | 0                   |
| <b>seq942</b>  | Firmicutes    | Clostridia   | 0                  | 13                  | 0                  | 0                   |
| <b>seq973</b>  | Firmicutes    | Clostridia   | 0                  | 0                   | 0                  | 0                   |
| <b>seq987</b>  | Firmicutes    | Clostridia   | 0                  | 0                   | 0                  | 0                   |
| <b>seq988</b>  | Firmicutes    | Clostridia   | 0                  | 0                   | 0                  | 0                   |
| <b>seq994</b>  | Firmicutes    | Clostridia   | 0                  | 0                   | 0                  | 0                   |
| <b>seq1005</b> | Firmicutes    | Clostridia   | 0                  | 0                   | 0                  | 0                   |
| <b>seq1013</b> | Firmicutes    | Clostridia   | 0                  | 0                   | 0                  | 0                   |
| <b>seq1021</b> | Firmicutes    | Clostridia   | 27                 | 108                 | 0                  | 0                   |
| <b>seq1025</b> | Firmicutes    | Clostridia   | 8                  | 3                   | 0                  | 0                   |
| <b>seq1031</b> | Firmicutes    | Clostridia   | 0                  | 0                   | 0                  | 0                   |
| <b>seq1054</b> | Firmicutes    | Clostridia   | 18                 | 0                   | 0                  | 0                   |
| <b>seq1065</b> | Firmicutes    | Clostridia   | 0                  | 0                   | 0                  | 0                   |
| <b>seq1097</b> | Firmicutes    | Clostridia   | 18                 | 19                  | 0                  | 0                   |
| <b>seq1100</b> | Firmicutes    | Clostridia   | 0                  | 0                   | 0                  | 0                   |
| <b>seq1101</b> | Firmicutes    | Clostridia   | 0                  | 0                   | 0                  | 0                   |
| <b>seq1115</b> | Firmicutes    | Clostridia   | 9                  | 5                   | 0                  | 0                   |
| <b>seq1128</b> | Firmicutes    | Clostridia   | 0                  | 0                   | 0                  | 0                   |
| <b>seq1130</b> | Firmicutes    | Clostridia   | 15                 | 44                  | 0                  | 0                   |
| <b>seq1134</b> | Firmicutes    | Clostridia   | 0                  | 0                   | 0                  | 0                   |
| <b>seq1138</b> | Firmicutes    | Clostridia   | 4                  | 22                  | 0                  | 0                   |
| <b>seq1148</b> | Firmicutes    | Clostridia   | 0                  | 0                   | 0                  | 0                   |
| <b>seq1149</b> | Firmicutes    | Clostridia   | 0                  | 0                   | 0                  | 0                   |
| <b>seq1152</b> | Firmicutes    | Clostridia   | 0                  | 0                   | 0                  | 0                   |
| <b>seq1157</b> | Firmicutes    | Clostridia   | 0                  | 0                   | 0                  | 0                   |
| <b>seq1167</b> | Firmicutes    | Clostridia   | 0                  | 0                   | 0                  | 0                   |
| <b>seq1199</b> | Firmicutes    | Clostridia   | 0                  | 0                   | 0                  | 0                   |
| <b>seq1205</b> | Firmicutes    | Clostridia   | 60                 | 18                  | 0                  | 0                   |
| <b>seq1230</b> | Firmicutes    | Clostridia   | 0                  | 0                   | 0                  | 0                   |
| <b>seq1245</b> | Firmicutes    | Clostridia   | 0                  | 0                   | 0                  | 0                   |

Sequence Count Table

|                | <b>Phylum</b> | <b>Class</b> | <b>Subject6WK0</b> | <b>Subject6WK12</b> | <b>Subject18WK0</b> | <b>Subject18WK12</b> |
|----------------|---------------|--------------|--------------------|---------------------|---------------------|----------------------|
| <b>seq929</b>  | Firmicutes    | Clostridia   | 0                  | 0                   | 0                   | 0                    |
| <b>seq930</b>  | Firmicutes    | Clostridia   | 61                 | 96                  | 0                   | 0                    |
| <b>seq937</b>  | Firmicutes    | Clostridia   | 0                  | 0                   | 0                   | 0                    |
| <b>seq942</b>  | Firmicutes    | Clostridia   | 0                  | 0                   | 0                   | 0                    |
| <b>seq973</b>  | Firmicutes    | Clostridia   | 0                  | 0                   | 0                   | 0                    |
| <b>seq987</b>  | Firmicutes    | Clostridia   | 0                  | 0                   | 0                   | 0                    |
| <b>seq988</b>  | Firmicutes    | Clostridia   | 0                  | 0                   | 0                   | 0                    |
| <b>seq994</b>  | Firmicutes    | Clostridia   | 0                  | 0                   | 0                   | 0                    |
| <b>seq1005</b> | Firmicutes    | Clostridia   | 0                  | 0                   | 0                   | 0                    |
| <b>seq1013</b> | Firmicutes    | Clostridia   | 10                 | 11                  | 0                   | 0                    |
| <b>seq1021</b> | Firmicutes    | Clostridia   | 0                  | 0                   | 0                   | 0                    |
| <b>seq1025</b> | Firmicutes    | Clostridia   | 0                  | 6                   | 0                   | 0                    |
| <b>seq1031</b> | Firmicutes    | Clostridia   | 0                  | 6                   | 3                   | 7                    |
| <b>seq1054</b> | Firmicutes    | Clostridia   | 22                 | 83                  | 0                   | 0                    |
| <b>seq1065</b> | Firmicutes    | Clostridia   | 0                  | 0                   | 0                   | 0                    |
| <b>seq1097</b> | Firmicutes    | Clostridia   | 0                  | 0                   | 0                   | 0                    |
| <b>seq1100</b> | Firmicutes    | Clostridia   | 0                  | 0                   | 0                   | 0                    |
| <b>seq1101</b> | Firmicutes    | Clostridia   | 0                  | 0                   | 0                   | 0                    |
| <b>seq1115</b> | Firmicutes    | Clostridia   | 0                  | 0                   | 0                   | 0                    |
| <b>seq1128</b> | Firmicutes    | Clostridia   | 0                  | 0                   | 0                   | 0                    |
| <b>seq1130</b> | Firmicutes    | Clostridia   | 0                  | 0                   | 0                   | 0                    |
| <b>seq1134</b> | Firmicutes    | Clostridia   | 26                 | 10                  | 0                   | 0                    |
| <b>seq1138</b> | Firmicutes    | Clostridia   | 0                  | 0                   | 0                   | 0                    |
| <b>seq1148</b> | Firmicutes    | Clostridia   | 0                  | 12                  | 0                   | 0                    |
| <b>seq1149</b> | Firmicutes    | Clostridia   | 0                  | 0                   | 0                   | 0                    |
| <b>seq1152</b> | Firmicutes    | Clostridia   | 0                  | 0                   | 0                   | 0                    |
| <b>seq1157</b> | Firmicutes    | Clostridia   | 0                  | 0                   | 0                   | 0                    |
| <b>seq1167</b> | Firmicutes    | Clostridia   | 0                  | 0                   | 0                   | 0                    |
| <b>seq1199</b> | Firmicutes    | Clostridia   | 0                  | 0                   | 0                   | 0                    |
| <b>seq1205</b> | Firmicutes    | Clostridia   | 0                  | 0                   | 0                   | 0                    |
| <b>seq1230</b> | Firmicutes    | Clostridia   | 0                  | 0                   | 0                   | 0                    |
| <b>seq1245</b> | Firmicutes    | Clostridia   | 34                 | 34                  | 0                   | 0                    |



Sequence Count Table

|                | <b>Phylum</b> | <b>Class</b> | <b>Subject19WK0</b> | <b>Subject19WK12</b> | <b>Subject20WK0</b> | <b>Subject20WK12</b> |
|----------------|---------------|--------------|---------------------|----------------------|---------------------|----------------------|
| <b>seq929</b>  | Firmicutes    | Clostridia   | 23                  | 39                   | 0                   | 0                    |
| <b>seq930</b>  | Firmicutes    | Clostridia   | 0                   | 0                    | 20                  | 0                    |
| <b>seq937</b>  | Firmicutes    | Clostridia   | 0                   | 0                    | 15                  | 5                    |
| <b>seq942</b>  | Firmicutes    | Clostridia   | 0                   | 0                    | 0                   | 0                    |
| <b>seq973</b>  | Firmicutes    | Clostridia   | 0                   | 0                    | 0                   | 0                    |
| <b>seq987</b>  | Firmicutes    | Clostridia   | 0                   | 0                    | 16                  | 14                   |
| <b>seq988</b>  | Firmicutes    | Clostridia   | 0                   | 0                    | 0                   | 0                    |
| <b>seq994</b>  | Firmicutes    | Clostridia   | 0                   | 0                    | 0                   | 0                    |
| <b>seq1005</b> | Firmicutes    | Clostridia   | 0                   | 0                    | 0                   | 0                    |
| <b>seq1013</b> | Firmicutes    | Clostridia   | 0                   | 0                    | 3                   | 2                    |
| <b>seq1021</b> | Firmicutes    | Clostridia   | 0                   | 0                    | 0                   | 0                    |
| <b>seq1025</b> | Firmicutes    | Clostridia   | 0                   | 0                    | 0                   | 0                    |
| <b>seq1031</b> | Firmicutes    | Clostridia   | 0                   | 0                    | 0                   | 0                    |
| <b>seq1054</b> | Firmicutes    | Clostridia   | 0                   | 0                    | 0                   | 0                    |
| <b>seq1065</b> | Firmicutes    | Clostridia   | 0                   | 0                    | 0                   | 0                    |
| <b>seq1097</b> | Firmicutes    | Clostridia   | 0                   | 0                    | 0                   | 0                    |
| <b>seq1100</b> | Firmicutes    | Clostridia   | 0                   | 0                    | 0                   | 0                    |
| <b>seq1101</b> | Firmicutes    | Clostridia   | 0                   | 0                    | 0                   | 0                    |
| <b>seq1115</b> | Firmicutes    | Clostridia   | 0                   | 0                    | 0                   | 0                    |
| <b>seq1128</b> | Firmicutes    | Clostridia   | 0                   | 0                    | 0                   | 0                    |
| <b>seq1130</b> | Firmicutes    | Clostridia   | 0                   | 0                    | 0                   | 0                    |
| <b>seq1134</b> | Firmicutes    | Clostridia   | 0                   | 0                    | 61                  | 0                    |
| <b>seq1138</b> | Firmicutes    | Clostridia   | 0                   | 0                    | 0                   | 0                    |
| <b>seq1148</b> | Firmicutes    | Clostridia   | 0                   | 0                    | 0                   | 0                    |
| <b>seq1149</b> | Firmicutes    | Clostridia   | 0                   | 0                    | 0                   | 0                    |
| <b>seq1152</b> | Firmicutes    | Clostridia   | 0                   | 0                    | 0                   | 0                    |
| <b>seq1157</b> | Firmicutes    | Clostridia   | 0                   | 0                    | 0                   | 19                   |
| <b>seq1167</b> | Firmicutes    | Clostridia   | 0                   | 0                    | 0                   | 0                    |
| <b>seq1199</b> | Firmicutes    | Clostridia   | 0                   | 0                    | 0                   | 0                    |
| <b>seq1205</b> | Firmicutes    | Clostridia   | 0                   | 0                    | 0                   | 0                    |
| <b>seq1230</b> | Firmicutes    | Clostridia   | 0                   | 0                    | 0                   | 0                    |
| <b>seq1245</b> | Firmicutes    | Clostridia   | 0                   | 0                    | 0                   | 0                    |

Sequence Count Table

|                | <b>Phylum</b> | <b>Class</b> | <b>Subject7WK0</b> | <b>Subject7WK12</b> | <b>Subject21WK0</b> | <b>Subject21WK12</b> |
|----------------|---------------|--------------|--------------------|---------------------|---------------------|----------------------|
| <b>seq929</b>  | Firmicutes    | Clostridia   | 7                  | 0                   | 0                   | 0                    |
| <b>seq930</b>  | Firmicutes    | Clostridia   | 0                  | 0                   | 0                   | 0                    |
| <b>seq937</b>  | Firmicutes    | Clostridia   | 0                  | 0                   | 0                   | 0                    |
| <b>seq942</b>  | Firmicutes    | Clostridia   | 19                 | 0                   | 0                   | 0                    |
| <b>seq973</b>  | Firmicutes    | Clostridia   | 0                  | 0                   | 0                   | 0                    |
| <b>seq987</b>  | Firmicutes    | Clostridia   | 0                  | 0                   | 0                   | 0                    |
| <b>seq988</b>  | Firmicutes    | Clostridia   | 0                  | 0                   | 0                   | 0                    |
| <b>seq994</b>  | Firmicutes    | Clostridia   | 0                  | 0                   | 0                   | 0                    |
| <b>seq1005</b> | Firmicutes    | Clostridia   | 0                  | 0                   | 0                   | 0                    |
| <b>seq1013</b> | Firmicutes    | Clostridia   | 20                 | 0                   | 0                   | 0                    |
| <b>seq1021</b> | Firmicutes    | Clostridia   | 0                  | 0                   | 0                   | 0                    |
| <b>seq1025</b> | Firmicutes    | Clostridia   | 7                  | 6                   | 0                   | 0                    |
| <b>seq1031</b> | Firmicutes    | Clostridia   | 18                 | 27                  | 0                   | 0                    |
| <b>seq1054</b> | Firmicutes    | Clostridia   | 0                  | 0                   | 0                   | 0                    |
| <b>seq1065</b> | Firmicutes    | Clostridia   | 0                  | 0                   | 0                   | 0                    |
| <b>seq1097</b> | Firmicutes    | Clostridia   | 0                  | 0                   | 0                   | 0                    |
| <b>seq1100</b> | Firmicutes    | Clostridia   | 0                  | 0                   | 0                   | 0                    |
| <b>seq1101</b> | Firmicutes    | Clostridia   | 0                  | 0                   | 0                   | 0                    |
| <b>seq1115</b> | Firmicutes    | Clostridia   | 0                  | 0                   | 0                   | 0                    |
| <b>seq1128</b> | Firmicutes    | Clostridia   | 0                  | 0                   | 0                   | 0                    |
| <b>seq1130</b> | Firmicutes    | Clostridia   | 0                  | 0                   | 0                   | 0                    |
| <b>seq1134</b> | Firmicutes    | Clostridia   | 0                  | 0                   | 0                   | 0                    |
| <b>seq1138</b> | Firmicutes    | Clostridia   | 11                 | 29                  | 0                   | 0                    |
| <b>seq1148</b> | Firmicutes    | Clostridia   | 0                  | 0                   | 0                   | 0                    |
| <b>seq1149</b> | Firmicutes    | Clostridia   | 0                  | 0                   | 0                   | 0                    |
| <b>seq1152</b> | Firmicutes    | Clostridia   | 0                  | 0                   | 0                   | 0                    |
| <b>seq1157</b> | Firmicutes    | Clostridia   | 0                  | 0                   | 0                   | 0                    |
| <b>seq1167</b> | Firmicutes    | Clostridia   | 0                  | 0                   | 0                   | 0                    |
| <b>seq1199</b> | Firmicutes    | Clostridia   | 12                 | 0                   | 0                   | 0                    |
| <b>seq1205</b> | Firmicutes    | Clostridia   | 0                  | 0                   | 0                   | 0                    |
| <b>seq1230</b> | Firmicutes    | Clostridia   | 0                  | 0                   | 0                   | 0                    |
| <b>seq1245</b> | Firmicutes    | Clostridia   | 0                  | 0                   | 0                   | 0                    |

Sequence Count Table

|                | <b>Phylum</b> | <b>Class</b> | <b>Subject8WK0</b> | <b>Subject8WK12</b> | <b>Subject9WK0</b> | <b>Subject9WK12</b> |
|----------------|---------------|--------------|--------------------|---------------------|--------------------|---------------------|
| <b>seq929</b>  | Firmicutes    | Clostridia   | 0                  | 0                   | 0                  | 0                   |
| <b>seq930</b>  | Firmicutes    | Clostridia   | 0                  | 0                   | 0                  | 0                   |
| <b>seq937</b>  | Firmicutes    | Clostridia   | 0                  | 0                   | 0                  | 0                   |
| <b>seq942</b>  | Firmicutes    | Clostridia   | 0                  | 0                   | 0                  | 0                   |
| <b>seq973</b>  | Firmicutes    | Clostridia   | 0                  | 0                   | 0                  | 0                   |
| <b>seq987</b>  | Firmicutes    | Clostridia   | 0                  | 0                   | 0                  | 0                   |
| <b>seq988</b>  | Firmicutes    | Clostridia   | 0                  | 0                   | 0                  | 0                   |
| <b>seq994</b>  | Firmicutes    | Clostridia   | 0                  | 0                   | 0                  | 0                   |
| <b>seq1005</b> | Firmicutes    | Clostridia   | 0                  | 0                   | 0                  | 0                   |
| <b>seq1013</b> | Firmicutes    | Clostridia   | 0                  | 0                   | 0                  | 0                   |
| <b>seq1021</b> | Firmicutes    | Clostridia   | 0                  | 0                   | 0                  | 0                   |
| <b>seq1025</b> | Firmicutes    | Clostridia   | 0                  | 0                   | 0                  | 0                   |
| <b>seq1031</b> | Firmicutes    | Clostridia   | 6                  | 9                   | 0                  | 0                   |
| <b>seq1054</b> | Firmicutes    | Clostridia   | 0                  | 0                   | 0                  | 0                   |
| <b>seq1065</b> | Firmicutes    | Clostridia   | 0                  | 0                   | 0                  | 0                   |
| <b>seq1097</b> | Firmicutes    | Clostridia   | 0                  | 0                   | 0                  | 0                   |
| <b>seq1100</b> | Firmicutes    | Clostridia   | 0                  | 0                   | 0                  | 0                   |
| <b>seq1101</b> | Firmicutes    | Clostridia   | 0                  | 0                   | 0                  | 0                   |
| <b>seq1115</b> | Firmicutes    | Clostridia   | 0                  | 0                   | 0                  | 0                   |
| <b>seq1128</b> | Firmicutes    | Clostridia   | 0                  | 0                   | 0                  | 0                   |
| <b>seq1130</b> | Firmicutes    | Clostridia   | 0                  | 0                   | 0                  | 0                   |
| <b>seq1134</b> | Firmicutes    | Clostridia   | 0                  | 0                   | 0                  | 0                   |
| <b>seq1138</b> | Firmicutes    | Clostridia   | 0                  | 0                   | 0                  | 0                   |
| <b>seq1148</b> | Firmicutes    | Clostridia   | 0                  | 0                   | 0                  | 0                   |
| <b>seq1149</b> | Firmicutes    | Clostridia   | 0                  | 0                   | 0                  | 0                   |
| <b>seq1152</b> | Firmicutes    | Clostridia   | 0                  | 0                   | 0                  | 0                   |
| <b>seq1157</b> | Firmicutes    | Clostridia   | 10                 | 0                   | 0                  | 0                   |
| <b>seq1167</b> | Firmicutes    | Clostridia   | 0                  | 0                   | 0                  | 0                   |
| <b>seq1199</b> | Firmicutes    | Clostridia   | 0                  | 0                   | 0                  | 0                   |
| <b>seq1205</b> | Firmicutes    | Clostridia   | 0                  | 0                   | 0                  | 0                   |
| <b>seq1230</b> | Firmicutes    | Clostridia   | 0                  | 0                   | 0                  | 0                   |
| <b>seq1245</b> | Firmicutes    | Clostridia   | 0                  | 0                   | 0                  | 0                   |

Sequence Count Table

|                | <b>Phylum</b> | <b>Class</b> | <b>Subject10WK0</b> | <b>Subject10WK12</b> | <b>Subject22WK0</b> | <b>Subject22WK12</b> |
|----------------|---------------|--------------|---------------------|----------------------|---------------------|----------------------|
| <b>seq929</b>  | Firmicutes    | Clostridia   | 10                  | 0                    | 0                   | 0                    |
| <b>seq930</b>  | Firmicutes    | Clostridia   | 0                   | 0                    | 0                   | 0                    |
| <b>seq937</b>  | Firmicutes    | Clostridia   | 0                   | 0                    | 0                   | 0                    |
| <b>seq942</b>  | Firmicutes    | Clostridia   | 0                   | 0                    | 16                  | 20                   |
| <b>seq973</b>  | Firmicutes    | Clostridia   | 0                   | 0                    | 0                   | 0                    |
| <b>seq987</b>  | Firmicutes    | Clostridia   | 0                   | 0                    | 0                   | 0                    |
| <b>seq988</b>  | Firmicutes    | Clostridia   | 0                   | 0                    | 0                   | 0                    |
| <b>seq994</b>  | Firmicutes    | Clostridia   | 0                   | 0                    | 11                  | 0                    |
| <b>seq1005</b> | Firmicutes    | Clostridia   | 0                   | 0                    | 76                  | 38                   |
| <b>seq1013</b> | Firmicutes    | Clostridia   | 0                   | 0                    | 0                   | 9                    |
| <b>seq1021</b> | Firmicutes    | Clostridia   | 0                   | 0                    | 0                   | 0                    |
| <b>seq1025</b> | Firmicutes    | Clostridia   | 0                   | 0                    | 11                  | 0                    |
| <b>seq1031</b> | Firmicutes    | Clostridia   | 0                   | 0                    | 0                   | 0                    |
| <b>seq1054</b> | Firmicutes    | Clostridia   | 0                   | 0                    | 0                   | 0                    |
| <b>seq1065</b> | Firmicutes    | Clostridia   | 0                   | 0                    | 0                   | 0                    |
| <b>seq1097</b> | Firmicutes    | Clostridia   | 0                   | 0                    | 0                   | 0                    |
| <b>seq1100</b> | Firmicutes    | Clostridia   | 0                   | 0                    | 49                  | 31                   |
| <b>seq1101</b> | Firmicutes    | Clostridia   | 0                   | 0                    | 0                   | 0                    |
| <b>seq1115</b> | Firmicutes    | Clostridia   | 0                   | 0                    | 39                  | 22                   |
| <b>seq1128</b> | Firmicutes    | Clostridia   | 0                   | 0                    | 0                   | 0                    |
| <b>seq1130</b> | Firmicutes    | Clostridia   | 0                   | 0                    | 0                   | 0                    |
| <b>seq1134</b> | Firmicutes    | Clostridia   | 0                   | 0                    | 0                   | 0                    |
| <b>seq1138</b> | Firmicutes    | Clostridia   | 0                   | 0                    | 0                   | 0                    |
| <b>seq1148</b> | Firmicutes    | Clostridia   | 0                   | 0                    | 0                   | 0                    |
| <b>seq1149</b> | Firmicutes    | Clostridia   | 0                   | 0                    | 0                   | 0                    |
| <b>seq1152</b> | Firmicutes    | Clostridia   | 0                   | 0                    | 46                  | 46                   |
| <b>seq1157</b> | Firmicutes    | Clostridia   | 0                   | 0                    | 13                  | 5                    |
| <b>seq1167</b> | Firmicutes    | Clostridia   | 0                   | 0                    | 0                   | 0                    |
| <b>seq1199</b> | Firmicutes    | Clostridia   | 0                   | 0                    | 0                   | 0                    |
| <b>seq1205</b> | Firmicutes    | Clostridia   | 0                   | 0                    | 0                   | 0                    |
| <b>seq1230</b> | Firmicutes    | Clostridia   | 0                   | 0                    | 0                   | 0                    |
| <b>seq1245</b> | Firmicutes    | Clostridia   | 0                   | 0                    | 0                   | 0                    |

Sequence Count Table

|                | <b>Phylum</b> | <b>Class</b> | <b>Subject23WK0</b> | <b>Subject23WK12</b> | <b>Subject24WK0</b> | <b>Subject24WK12</b> |
|----------------|---------------|--------------|---------------------|----------------------|---------------------|----------------------|
| <b>seq929</b>  | Firmicutes    | Clostridia   | 0                   | 0                    | 0                   | 0                    |
| <b>seq930</b>  | Firmicutes    | Clostridia   | 0                   | 0                    | 0                   | 0                    |
| <b>seq937</b>  | Firmicutes    | Clostridia   | 17                  | 22                   | 0                   | 0                    |
| <b>seq942</b>  | Firmicutes    | Clostridia   | 0                   | 0                    | 0                   | 0                    |
| <b>seq973</b>  | Firmicutes    | Clostridia   | 0                   | 0                    | 0                   | 0                    |
| <b>seq987</b>  | Firmicutes    | Clostridia   | 0                   | 0                    | 0                   | 0                    |
| <b>seq988</b>  | Firmicutes    | Clostridia   | 0                   | 0                    | 0                   | 0                    |
| <b>seq994</b>  | Firmicutes    | Clostridia   | 0                   | 0                    | 0                   | 0                    |
| <b>seq1005</b> | Firmicutes    | Clostridia   | 0                   | 0                    | 0                   | 0                    |
| <b>seq1013</b> | Firmicutes    | Clostridia   | 0                   | 4                    | 0                   | 0                    |
| <b>seq1021</b> | Firmicutes    | Clostridia   | 0                   | 0                    | 0                   | 0                    |
| <b>seq1025</b> | Firmicutes    | Clostridia   | 0                   | 0                    | 0                   | 19                   |
| <b>seq1031</b> | Firmicutes    | Clostridia   | 0                   | 0                    | 0                   | 0                    |
| <b>seq1054</b> | Firmicutes    | Clostridia   | 0                   | 0                    | 0                   | 0                    |
| <b>seq1065</b> | Firmicutes    | Clostridia   | 0                   | 0                    | 0                   | 0                    |
| <b>seq1097</b> | Firmicutes    | Clostridia   | 0                   | 0                    | 0                   | 0                    |
| <b>seq1100</b> | Firmicutes    | Clostridia   | 0                   | 0                    | 0                   | 0                    |
| <b>seq1101</b> | Firmicutes    | Clostridia   | 0                   | 22                   | 0                   | 0                    |
| <b>seq1115</b> | Firmicutes    | Clostridia   | 0                   | 0                    | 0                   | 0                    |
| <b>seq1128</b> | Firmicutes    | Clostridia   | 0                   | 0                    | 0                   | 0                    |
| <b>seq1130</b> | Firmicutes    | Clostridia   | 0                   | 0                    | 0                   | 0                    |
| <b>seq1134</b> | Firmicutes    | Clostridia   | 0                   | 0                    | 0                   | 0                    |
| <b>seq1138</b> | Firmicutes    | Clostridia   | 0                   | 0                    | 0                   | 0                    |
| <b>seq1148</b> | Firmicutes    | Clostridia   | 0                   | 0                    | 0                   | 0                    |
| <b>seq1149</b> | Firmicutes    | Clostridia   | 0                   | 0                    | 0                   | 0                    |
| <b>seq1152</b> | Firmicutes    | Clostridia   | 0                   | 0                    | 0                   | 0                    |
| <b>seq1157</b> | Firmicutes    | Clostridia   | 10                  | 21                   | 0                   | 0                    |
| <b>seq1167</b> | Firmicutes    | Clostridia   | 0                   | 0                    | 0                   | 0                    |
| <b>seq1199</b> | Firmicutes    | Clostridia   | 0                   | 16                   | 0                   | 0                    |
| <b>seq1205</b> | Firmicutes    | Clostridia   | 0                   | 0                    | 0                   | 0                    |
| <b>seq1230</b> | Firmicutes    | Clostridia   | 0                   | 0                    | 0                   | 0                    |
| <b>seq1245</b> | Firmicutes    | Clostridia   | 0                   | 0                    | 0                   | 0                    |

Sequence Count Table

|                | <b>Phylum</b> | <b>Class</b> | <b>Subject11WK0</b> | <b>Subject11WK12</b> | <b>Subject12WK0</b> | <b>Subject12WK12</b> |
|----------------|---------------|--------------|---------------------|----------------------|---------------------|----------------------|
| <b>seq929</b>  | Firmicutes    | Clostridia   | 14                  | 20                   | 0                   | 0                    |
| <b>seq930</b>  | Firmicutes    | Clostridia   | 0                   | 0                    | 0                   | 0                    |
| <b>seq937</b>  | Firmicutes    | Clostridia   | 0                   | 0                    | 0                   | 0                    |
| <b>seq942</b>  | Firmicutes    | Clostridia   | 10                  | 0                    | 0                   | 0                    |
| <b>seq973</b>  | Firmicutes    | Clostridia   | 2                   | 0                    | 0                   | 0                    |
| <b>seq987</b>  | Firmicutes    | Clostridia   | 0                   | 0                    | 21                  | 9                    |
| <b>seq988</b>  | Firmicutes    | Clostridia   | 0                   | 0                    | 8                   | 0                    |
| <b>seq994</b>  | Firmicutes    | Clostridia   | 0                   | 0                    | 0                   | 0                    |
| <b>seq1005</b> | Firmicutes    | Clostridia   | 0                   | 0                    | 0                   | 0                    |
| <b>seq1013</b> | Firmicutes    | Clostridia   | 0                   | 0                    | 0                   | 0                    |
| <b>seq1021</b> | Firmicutes    | Clostridia   | 0                   | 0                    | 0                   | 0                    |
| <b>seq1025</b> | Firmicutes    | Clostridia   | 0                   | 0                    | 0                   | 0                    |
| <b>seq1031</b> | Firmicutes    | Clostridia   | 0                   | 0                    | 0                   | 0                    |
| <b>seq1054</b> | Firmicutes    | Clostridia   | 0                   | 0                    | 0                   | 0                    |
| <b>seq1065</b> | Firmicutes    | Clostridia   | 0                   | 0                    | 0                   | 0                    |
| <b>seq1097</b> | Firmicutes    | Clostridia   | 0                   | 0                    | 0                   | 0                    |
| <b>seq1100</b> | Firmicutes    | Clostridia   | 0                   | 0                    | 0                   | 0                    |
| <b>seq1101</b> | Firmicutes    | Clostridia   | 0                   | 0                    | 0                   | 0                    |
| <b>seq1115</b> | Firmicutes    | Clostridia   | 0                   | 0                    | 0                   | 0                    |
| <b>seq1128</b> | Firmicutes    | Clostridia   | 57                  | 0                    | 0                   | 0                    |
| <b>seq1130</b> | Firmicutes    | Clostridia   | 0                   | 0                    | 0                   | 0                    |
| <b>seq1134</b> | Firmicutes    | Clostridia   | 0                   | 0                    | 0                   | 0                    |
| <b>seq1138</b> | Firmicutes    | Clostridia   | 0                   | 0                    | 0                   | 0                    |
| <b>seq1148</b> | Firmicutes    | Clostridia   | 0                   | 0                    | 0                   | 0                    |
| <b>seq1149</b> | Firmicutes    | Clostridia   | 0                   | 0                    | 0                   | 0                    |
| <b>seq1152</b> | Firmicutes    | Clostridia   | 0                   | 0                    | 0                   | 0                    |
| <b>seq1157</b> | Firmicutes    | Clostridia   | 0                   | 0                    | 0                   | 0                    |
| <b>seq1167</b> | Firmicutes    | Clostridia   | 0                   | 0                    | 0                   | 0                    |
| <b>seq1199</b> | Firmicutes    | Clostridia   | 0                   | 0                    | 0                   | 0                    |
| <b>seq1205</b> | Firmicutes    | Clostridia   | 0                   | 0                    | 0                   | 0                    |
| <b>seq1230</b> | Firmicutes    | Clostridia   | 0                   | 0                    | 0                   | 0                    |
| <b>seq1245</b> | Firmicutes    | Clostridia   | 0                   | 0                    | 0                   | 0                    |

Sequence Count Table

|                | <b>Phylum</b> | <b>Class</b> | <b>Subject25WK0</b> | <b>Subject25WK12</b> | <b>Subject38WK0</b> | <b>Subject38WK12</b> |
|----------------|---------------|--------------|---------------------|----------------------|---------------------|----------------------|
| <b>seq929</b>  | Firmicutes    | Clostridia   | 0                   | 0                    | 0                   | 0                    |
| <b>seq930</b>  | Firmicutes    | Clostridia   | 0                   | 0                    | 0                   | 0                    |
| <b>seq937</b>  | Firmicutes    | Clostridia   | 0                   | 0                    | 0                   | 0                    |
| <b>seq942</b>  | Firmicutes    | Clostridia   | 0                   | 0                    | 0                   | 0                    |
| <b>seq973</b>  | Firmicutes    | Clostridia   | 0                   | 0                    | 0                   | 0                    |
| <b>seq987</b>  | Firmicutes    | Clostridia   | 0                   | 0                    | 0                   | 0                    |
| <b>seq988</b>  | Firmicutes    | Clostridia   | 0                   | 0                    | 0                   | 0                    |
| <b>seq994</b>  | Firmicutes    | Clostridia   | 0                   | 0                    | 0                   | 0                    |
| <b>seq1005</b> | Firmicutes    | Clostridia   | 0                   | 0                    | 0                   | 0                    |
| <b>seq1013</b> | Firmicutes    | Clostridia   | 38                  | 29                   | 0                   | 0                    |
| <b>seq1021</b> | Firmicutes    | Clostridia   | 0                   | 0                    | 0                   | 0                    |
| <b>seq1025</b> | Firmicutes    | Clostridia   | 8                   | 5                    | 0                   | 0                    |
| <b>seq1031</b> | Firmicutes    | Clostridia   | 0                   | 0                    | 0                   | 0                    |
| <b>seq1054</b> | Firmicutes    | Clostridia   | 0                   | 0                    | 0                   | 0                    |
| <b>seq1065</b> | Firmicutes    | Clostridia   | 0                   | 0                    | 0                   | 0                    |
| <b>seq1097</b> | Firmicutes    | Clostridia   | 0                   | 0                    | 0                   | 0                    |
| <b>seq1100</b> | Firmicutes    | Clostridia   | 0                   | 0                    | 0                   | 0                    |
| <b>seq1101</b> | Firmicutes    | Clostridia   | 0                   | 0                    | 0                   | 0                    |
| <b>seq1115</b> | Firmicutes    | Clostridia   | 0                   | 0                    | 0                   | 0                    |
| <b>seq1128</b> | Firmicutes    | Clostridia   | 0                   | 0                    | 0                   | 0                    |
| <b>seq1130</b> | Firmicutes    | Clostridia   | 0                   | 0                    | 0                   | 0                    |
| <b>seq1134</b> | Firmicutes    | Clostridia   | 0                   | 0                    | 0                   | 0                    |
| <b>seq1138</b> | Firmicutes    | Clostridia   | 0                   | 0                    | 0                   | 0                    |
| <b>seq1148</b> | Firmicutes    | Clostridia   | 0                   | 0                    | 0                   | 0                    |
| <b>seq1149</b> | Firmicutes    | Clostridia   | 0                   | 0                    | 0                   | 0                    |
| <b>seq1152</b> | Firmicutes    | Clostridia   | 0                   | 0                    | 0                   | 0                    |
| <b>seq1157</b> | Firmicutes    | Clostridia   | 0                   | 0                    | 0                   | 0                    |
| <b>seq1167</b> | Firmicutes    | Clostridia   | 0                   | 0                    | 0                   | 0                    |
| <b>seq1199</b> | Firmicutes    | Clostridia   | 0                   | 0                    | 0                   | 0                    |
| <b>seq1205</b> | Firmicutes    | Clostridia   | 0                   | 0                    | 0                   | 0                    |
| <b>seq1230</b> | Firmicutes    | Clostridia   | 0                   | 0                    | 0                   | 0                    |
| <b>seq1245</b> | Firmicutes    | Clostridia   | 0                   | 0                    | 0                   | 0                    |

Sequence Count Table

|                | <b>Phylum</b> | <b>Class</b> | <b>Subject31WK0</b> | <b>Subject31WK12</b> | <b>Subject32WK0</b> | <b>Subject32WK12</b> |
|----------------|---------------|--------------|---------------------|----------------------|---------------------|----------------------|
| <b>seq929</b>  | Firmicutes    | Clostridia   | 0                   | 0                    | 10                  | 0                    |
| <b>seq930</b>  | Firmicutes    | Clostridia   | 0                   | 0                    | 0                   | 0                    |
| <b>seq937</b>  | Firmicutes    | Clostridia   | 0                   | 0                    | 0                   | 0                    |
| <b>seq942</b>  | Firmicutes    | Clostridia   | 0                   | 0                    | 0                   | 0                    |
| <b>seq973</b>  | Firmicutes    | Clostridia   | 0                   | 0                    | 0                   | 0                    |
| <b>seq987</b>  | Firmicutes    | Clostridia   | 0                   | 0                    | 0                   | 0                    |
| <b>seq988</b>  | Firmicutes    | Clostridia   | 0                   | 0                    | 0                   | 0                    |
| <b>seq994</b>  | Firmicutes    | Clostridia   | 0                   | 0                    | 0                   | 0                    |
| <b>seq1005</b> | Firmicutes    | Clostridia   | 0                   | 0                    | 0                   | 0                    |
| <b>seq1013</b> | Firmicutes    | Clostridia   | 0                   | 0                    | 0                   | 0                    |
| <b>seq1021</b> | Firmicutes    | Clostridia   | 0                   | 0                    | 0                   | 0                    |
| <b>seq1025</b> | Firmicutes    | Clostridia   | 0                   | 0                    | 0                   | 0                    |
| <b>seq1031</b> | Firmicutes    | Clostridia   | 0                   | 0                    | 0                   | 0                    |
| <b>seq1054</b> | Firmicutes    | Clostridia   | 0                   | 0                    | 0                   | 0                    |
| <b>seq1065</b> | Firmicutes    | Clostridia   | 0                   | 0                    | 0                   | 0                    |
| <b>seq1097</b> | Firmicutes    | Clostridia   | 0                   | 0                    | 0                   | 0                    |
| <b>seq1100</b> | Firmicutes    | Clostridia   | 0                   | 0                    | 0                   | 0                    |
| <b>seq1101</b> | Firmicutes    | Clostridia   | 0                   | 0                    | 0                   | 0                    |
| <b>seq1115</b> | Firmicutes    | Clostridia   | 0                   | 0                    | 0                   | 0                    |
| <b>seq1128</b> | Firmicutes    | Clostridia   | 0                   | 0                    | 0                   | 0                    |
| <b>seq1130</b> | Firmicutes    | Clostridia   | 0                   | 0                    | 0                   | 0                    |
| <b>seq1134</b> | Firmicutes    | Clostridia   | 0                   | 0                    | 0                   | 0                    |
| <b>seq1138</b> | Firmicutes    | Clostridia   | 0                   | 0                    | 0                   | 0                    |
| <b>seq1148</b> | Firmicutes    | Clostridia   | 0                   | 0                    | 0                   | 0                    |
| <b>seq1149</b> | Firmicutes    | Clostridia   | 0                   | 0                    | 0                   | 0                    |
| <b>seq1152</b> | Firmicutes    | Clostridia   | 0                   | 0                    | 0                   | 0                    |
| <b>seq1157</b> | Firmicutes    | Clostridia   | 0                   | 0                    | 0                   | 0                    |
| <b>seq1167</b> | Firmicutes    | Clostridia   | 0                   | 0                    | 0                   | 0                    |
| <b>seq1199</b> | Firmicutes    | Clostridia   | 0                   | 0                    | 0                   | 0                    |
| <b>seq1205</b> | Firmicutes    | Clostridia   | 0                   | 0                    | 0                   | 0                    |
| <b>seq1230</b> | Firmicutes    | Clostridia   | 0                   | 0                    | 0                   | 0                    |
| <b>seq1245</b> | Firmicutes    | Clostridia   | 0                   | 0                    | 0                   | 0                    |



Sequence Count Table

|                | <b>Phylum</b> | <b>Class</b> | <b>Subject13WK0</b> | <b>Subject13WK12</b> | <b>Subject39WK0</b> | <b>Subject39WK12</b> |
|----------------|---------------|--------------|---------------------|----------------------|---------------------|----------------------|
| <b>seq929</b>  | Firmicutes    | Clostridia   | 0                   | 0                    | 0                   | 0                    |
| <b>seq930</b>  | Firmicutes    | Clostridia   | 0                   | 0                    | 0                   | 0                    |
| <b>seq937</b>  | Firmicutes    | Clostridia   | 0                   | 0                    | 0                   | 0                    |
| <b>seq942</b>  | Firmicutes    | Clostridia   | 21                  | 22                   | 0                   | 0                    |
| <b>seq973</b>  | Firmicutes    | Clostridia   | 0                   | 0                    | 0                   | 0                    |
| <b>seq987</b>  | Firmicutes    | Clostridia   | 0                   | 0                    | 0                   | 6                    |
| <b>seq988</b>  | Firmicutes    | Clostridia   | 0                   | 9                    | 0                   | 0                    |
| <b>seq994</b>  | Firmicutes    | Clostridia   | 20                  | 54                   | 0                   | 0                    |
| <b>seq1005</b> | Firmicutes    | Clostridia   | 28                  | 0                    | 0                   | 0                    |
| <b>seq1013</b> | Firmicutes    | Clostridia   | 0                   | 0                    | 0                   | 0                    |
| <b>seq1021</b> | Firmicutes    | Clostridia   | 0                   | 0                    | 0                   | 0                    |
| <b>seq1025</b> | Firmicutes    | Clostridia   | 0                   | 12                   | 0                   | 0                    |
| <b>seq1031</b> | Firmicutes    | Clostridia   | 0                   | 0                    | 0                   | 0                    |
| <b>seq1054</b> | Firmicutes    | Clostridia   | 0                   | 0                    | 0                   | 0                    |
| <b>seq1065</b> | Firmicutes    | Clostridia   | 0                   | 0                    | 0                   | 0                    |
| <b>seq1097</b> | Firmicutes    | Clostridia   | 19                  | 0                    | 0                   | 0                    |
| <b>seq1100</b> | Firmicutes    | Clostridia   | 25                  | 0                    | 0                   | 0                    |
| <b>seq1101</b> | Firmicutes    | Clostridia   | 0                   | 0                    | 0                   | 0                    |
| <b>seq1115</b> | Firmicutes    | Clostridia   | 27                  | 0                    | 0                   | 0                    |
| <b>seq1128</b> | Firmicutes    | Clostridia   | 0                   | 0                    | 0                   | 0                    |
| <b>seq1130</b> | Firmicutes    | Clostridia   | 0                   | 0                    | 0                   | 0                    |
| <b>seq1134</b> | Firmicutes    | Clostridia   | 0                   | 0                    | 0                   | 0                    |
| <b>seq1138</b> | Firmicutes    | Clostridia   | 0                   | 0                    | 0                   | 0                    |
| <b>seq1148</b> | Firmicutes    | Clostridia   | 0                   | 0                    | 0                   | 0                    |
| <b>seq1149</b> | Firmicutes    | Clostridia   | 0                   | 0                    | 0                   | 0                    |
| <b>seq1152</b> | Firmicutes    | Clostridia   | 0                   | 0                    | 0                   | 0                    |
| <b>seq1157</b> | Firmicutes    | Clostridia   | 0                   | 0                    | 0                   | 0                    |
| <b>seq1167</b> | Firmicutes    | Clostridia   | 0                   | 0                    | 0                   | 0                    |
| <b>seq1199</b> | Firmicutes    | Clostridia   | 0                   | 0                    | 0                   | 0                    |
| <b>seq1205</b> | Firmicutes    | Clostridia   | 0                   | 0                    | 0                   | 0                    |
| <b>seq1230</b> | Firmicutes    | Clostridia   | 0                   | 72                   | 0                   | 0                    |
| <b>seq1245</b> | Firmicutes    | Clostridia   | 0                   | 0                    | 0                   | 0                    |

Sequence Count Table

|                | <b>Phylum</b> | <b>Class</b> | <b>Subject26WK0</b> | <b>Subject26WK12</b> | <b>Subject14WK0</b> | <b>Subject14WK12</b> |
|----------------|---------------|--------------|---------------------|----------------------|---------------------|----------------------|
| <b>seq929</b>  | Firmicutes    | Clostridia   | 0                   | 33                   | 0                   | 0                    |
| <b>seq930</b>  | Firmicutes    | Clostridia   | 0                   | 0                    | 0                   | 0                    |
| <b>seq937</b>  | Firmicutes    | Clostridia   | 0                   | 0                    | 43                  | 70                   |
| <b>seq942</b>  | Firmicutes    | Clostridia   | 9                   | 0                    | 0                   | 0                    |
| <b>seq973</b>  | Firmicutes    | Clostridia   | 0                   | 0                    | 0                   | 0                    |
| <b>seq987</b>  | Firmicutes    | Clostridia   | 0                   | 0                    | 0                   | 0                    |
| <b>seq988</b>  | Firmicutes    | Clostridia   | 19                  | 41                   | 0                   | 0                    |
| <b>seq994</b>  | Firmicutes    | Clostridia   | 0                   | 0                    | 0                   | 30                   |
| <b>seq1005</b> | Firmicutes    | Clostridia   | 0                   | 0                    | 0                   | 0                    |
| <b>seq1013</b> | Firmicutes    | Clostridia   | 0                   | 0                    | 0                   | 0                    |
| <b>seq1021</b> | Firmicutes    | Clostridia   | 0                   | 0                    | 0                   | 0                    |
| <b>seq1025</b> | Firmicutes    | Clostridia   | 0                   | 0                    | 0                   | 0                    |
| <b>seq1031</b> | Firmicutes    | Clostridia   | 0                   | 0                    | 0                   | 0                    |
| <b>seq1054</b> | Firmicutes    | Clostridia   | 0                   | 0                    | 0                   | 0                    |
| <b>seq1065</b> | Firmicutes    | Clostridia   | 0                   | 0                    | 0                   | 0                    |
| <b>seq1097</b> | Firmicutes    | Clostridia   | 0                   | 0                    | 0                   | 22                   |
| <b>seq1100</b> | Firmicutes    | Clostridia   | 0                   | 0                    | 0                   | 0                    |
| <b>seq1101</b> | Firmicutes    | Clostridia   | 0                   | 0                    | 22                  | 30                   |
| <b>seq1115</b> | Firmicutes    | Clostridia   | 0                   | 0                    | 0                   | 0                    |
| <b>seq1128</b> | Firmicutes    | Clostridia   | 0                   | 0                    | 0                   | 0                    |
| <b>seq1130</b> | Firmicutes    | Clostridia   | 0                   | 0                    | 0                   | 0                    |
| <b>seq1134</b> | Firmicutes    | Clostridia   | 0                   | 0                    | 0                   | 0                    |
| <b>seq1138</b> | Firmicutes    | Clostridia   | 0                   | 30                   | 0                   | 0                    |
| <b>seq1148</b> | Firmicutes    | Clostridia   | 0                   | 0                    | 0                   | 0                    |
| <b>seq1149</b> | Firmicutes    | Clostridia   | 0                   | 0                    | 0                   | 0                    |
| <b>seq1152</b> | Firmicutes    | Clostridia   | 0                   | 0                    | 0                   | 0                    |
| <b>seq1157</b> | Firmicutes    | Clostridia   | 0                   | 0                    | 0                   | 0                    |
| <b>seq1167</b> | Firmicutes    | Clostridia   | 0                   | 0                    | 0                   | 0                    |
| <b>seq1199</b> | Firmicutes    | Clostridia   | 0                   | 0                    | 0                   | 0                    |
| <b>seq1205</b> | Firmicutes    | Clostridia   | 0                   | 0                    | 0                   | 0                    |
| <b>seq1230</b> | Firmicutes    | Clostridia   | 0                   | 0                    | 0                   | 0                    |
| <b>seq1245</b> | Firmicutes    | Clostridia   | 0                   | 0                    | 0                   | 0                    |

Sequence Count Table

|                | <b>Phylum</b> | <b>Class</b> | <b>Subject27WK0</b> | <b>Subject27WK12</b> | <b>Subject15WK0</b> | <b>Subject15WK12</b> |
|----------------|---------------|--------------|---------------------|----------------------|---------------------|----------------------|
| <b>seq929</b>  | Firmicutes    | Clostridia   | 0                   | 0                    | 0                   | 0                    |
| <b>seq930</b>  | Firmicutes    | Clostridia   | 0                   | 0                    | 0                   | 0                    |
| <b>seq937</b>  | Firmicutes    | Clostridia   | 0                   | 0                    | 0                   | 0                    |
| <b>seq942</b>  | Firmicutes    | Clostridia   | 0                   | 0                    | 0                   | 0                    |
| <b>seq973</b>  | Firmicutes    | Clostridia   | 0                   | 0                    | 0                   | 0                    |
| <b>seq987</b>  | Firmicutes    | Clostridia   | 0                   | 19                   | 0                   | 0                    |
| <b>seq988</b>  | Firmicutes    | Clostridia   | 19                  | 14                   | 0                   | 0                    |
| <b>seq994</b>  | Firmicutes    | Clostridia   | 0                   | 0                    | 0                   | 0                    |
| <b>seq1005</b> | Firmicutes    | Clostridia   | 0                   | 0                    | 0                   | 0                    |
| <b>seq1013</b> | Firmicutes    | Clostridia   | 0                   | 0                    | 0                   | 0                    |
| <b>seq1021</b> | Firmicutes    | Clostridia   | 0                   | 0                    | 0                   | 0                    |
| <b>seq1025</b> | Firmicutes    | Clostridia   | 0                   | 0                    | 0                   | 0                    |
| <b>seq1031</b> | Firmicutes    | Clostridia   | 15                  | 5                    | 0                   | 0                    |
| <b>seq1054</b> | Firmicutes    | Clostridia   | 0                   | 0                    | 0                   | 0                    |
| <b>seq1065</b> | Firmicutes    | Clostridia   | 0                   | 0                    | 0                   | 0                    |
| <b>seq1097</b> | Firmicutes    | Clostridia   | 0                   | 0                    | 0                   | 0                    |
| <b>seq1100</b> | Firmicutes    | Clostridia   | 0                   | 0                    | 0                   | 0                    |
| <b>seq1101</b> | Firmicutes    | Clostridia   | 0                   | 0                    | 0                   | 0                    |
| <b>seq1115</b> | Firmicutes    | Clostridia   | 0                   | 0                    | 0                   | 0                    |
| <b>seq1128</b> | Firmicutes    | Clostridia   | 0                   | 0                    | 0                   | 0                    |
| <b>seq1130</b> | Firmicutes    | Clostridia   | 25                  | 14                   | 0                   | 0                    |
| <b>seq1134</b> | Firmicutes    | Clostridia   | 0                   | 0                    | 0                   | 0                    |
| <b>seq1138</b> | Firmicutes    | Clostridia   | 0                   | 0                    | 0                   | 0                    |
| <b>seq1148</b> | Firmicutes    | Clostridia   | 0                   | 0                    | 0                   | 0                    |
| <b>seq1149</b> | Firmicutes    | Clostridia   | 0                   | 0                    | 0                   | 0                    |
| <b>seq1152</b> | Firmicutes    | Clostridia   | 0                   | 0                    | 0                   | 0                    |
| <b>seq1157</b> | Firmicutes    | Clostridia   | 0                   | 0                    | 0                   | 0                    |
| <b>seq1167</b> | Firmicutes    | Clostridia   | 0                   | 0                    | 0                   | 0                    |
| <b>seq1199</b> | Firmicutes    | Clostridia   | 0                   | 0                    | 0                   | 0                    |
| <b>seq1205</b> | Firmicutes    | Clostridia   | 0                   | 0                    | 0                   | 0                    |
| <b>seq1230</b> | Firmicutes    | Clostridia   | 0                   | 0                    | 0                   | 0                    |
| <b>seq1245</b> | Firmicutes    | Clostridia   | 0                   | 0                    | 0                   | 0                    |

Sequence Count Table

|                | <b>Phylum</b> | <b>Class</b> | <b>Δ</b> |  |  |  |
|----------------|---------------|--------------|----------|--|--|--|
| <b>seq929</b>  | Firmicutes    | Clostridia   |          |  |  |  |
| <b>seq930</b>  | Firmicutes    | Clostridia   |          |  |  |  |
| <b>seq937</b>  | Firmicutes    | Clostridia   |          |  |  |  |
| <b>seq942</b>  | Firmicutes    | Clostridia   |          |  |  |  |
| <b>seq973</b>  | Firmicutes    | Clostridia   |          |  |  |  |
| <b>seq987</b>  | Firmicutes    | Clostridia   |          |  |  |  |
| <b>seq988</b>  | Firmicutes    | Clostridia   |          |  |  |  |
| <b>seq994</b>  | Firmicutes    | Clostridia   |          |  |  |  |
| <b>seq1005</b> | Firmicutes    | Clostridia   |          |  |  |  |
| <b>seq1013</b> | Firmicutes    | Clostridia   |          |  |  |  |
| <b>seq1021</b> | Firmicutes    | Clostridia   |          |  |  |  |
| <b>seq1025</b> | Firmicutes    | Clostridia   |          |  |  |  |
| <b>seq1031</b> | Firmicutes    | Clostridia   |          |  |  |  |
| <b>seq1054</b> | Firmicutes    | Clostridia   |          |  |  |  |
| <b>seq1065</b> | Firmicutes    | Clostridia   |          |  |  |  |
| <b>seq1097</b> | Firmicutes    | Clostridia   |          |  |  |  |
| <b>seq1100</b> | Firmicutes    | Clostridia   |          |  |  |  |
| <b>seq1101</b> | Firmicutes    | Clostridia   |          |  |  |  |
| <b>seq1115</b> | Firmicutes    | Clostridia   |          |  |  |  |
| <b>seq1128</b> | Firmicutes    | Clostridia   |          |  |  |  |
| <b>seq1130</b> | Firmicutes    | Clostridia   |          |  |  |  |
| <b>seq1134</b> | Firmicutes    | Clostridia   |          |  |  |  |
| <b>seq1138</b> | Firmicutes    | Clostridia   |          |  |  |  |
| <b>seq1148</b> | Firmicutes    | Clostridia   |          |  |  |  |
| <b>seq1149</b> | Firmicutes    | Clostridia   |          |  |  |  |
| <b>seq1152</b> | Firmicutes    | Clostridia   |          |  |  |  |
| <b>seq1157</b> | Firmicutes    | Clostridia   |          |  |  |  |
| <b>seq1167</b> | Firmicutes    | Clostridia   |          |  |  |  |
| <b>seq1199</b> | Firmicutes    | Clostridia   |          |  |  |  |
| <b>seq1205</b> | Firmicutes    | Clostridia   |          |  |  |  |
| <b>seq1230</b> | Firmicutes    | Clostridia   |          |  |  |  |
| <b>seq1245</b> | Firmicutes    | Clostridia   |          |  |  |  |

Sequence Count Table

|                | <b>Phylum</b> | <b>Class</b> | <b>Order</b>  | <b>Family</b>   |
|----------------|---------------|--------------|---------------|-----------------|
| <b>seq1247</b> | Firmicutes    | Clostridia   | Clostridiales | Ruminococcaceae |
| <b>seq1251</b> | Firmicutes    | Clostridia   | Clostridiales | Ruminococcaceae |
| <b>seq1254</b> | Firmicutes    | Clostridia   | Clostridiales | Ruminococcaceae |
| <b>seq1258</b> | Firmicutes    | Clostridia   | Clostridiales | Ruminococcaceae |
| <b>seq1264</b> | Firmicutes    | Clostridia   | Clostridiales | Ruminococcaceae |
| <b>seq1272</b> | Firmicutes    | Clostridia   | Clostridiales | Ruminococcaceae |
| <b>seq1274</b> | Firmicutes    | Clostridia   | Clostridiales | Ruminococcaceae |
| <b>seq1287</b> | Firmicutes    | Clostridia   | Clostridiales | Ruminococcaceae |
| <b>seq1289</b> | Firmicutes    | Clostridia   | Clostridiales | Ruminococcaceae |
| <b>seq1299</b> | Firmicutes    | Clostridia   | Clostridiales | Ruminococcaceae |
| <b>seq1303</b> | Firmicutes    | Clostridia   | Clostridiales | Ruminococcaceae |
| <b>seq1330</b> | Firmicutes    | Clostridia   | Clostridiales | Ruminococcaceae |
| <b>seq1331</b> | Firmicutes    | Clostridia   | Clostridiales | Ruminococcaceae |
| <b>seq1335</b> | Firmicutes    | Clostridia   | Clostridiales | Ruminococcaceae |
| <b>seq1340</b> | Firmicutes    | Clostridia   | Clostridiales | Ruminococcaceae |
| <b>seq1344</b> | Firmicutes    | Clostridia   | Clostridiales | Ruminococcaceae |
| <b>seq1346</b> | Firmicutes    | Clostridia   | Clostridiales | Ruminococcaceae |
| <b>seq1361</b> | Firmicutes    | Clostridia   | Clostridiales | Ruminococcaceae |
| <b>seq1363</b> | Firmicutes    | Clostridia   | Clostridiales | Ruminococcaceae |
| <b>seq1373</b> | Firmicutes    | Clostridia   | Clostridiales | Ruminococcaceae |
| <b>seq1381</b> | Firmicutes    | Clostridia   | Clostridiales | Ruminococcaceae |
| <b>seq1383</b> | Firmicutes    | Clostridia   | Clostridiales | Ruminococcaceae |
| <b>seq1386</b> | Firmicutes    | Clostridia   | Clostridiales | Ruminococcaceae |
| <b>seq1392</b> | Firmicutes    | Clostridia   | Clostridiales | Ruminococcaceae |
| <b>seq1398</b> | Firmicutes    | Clostridia   | Clostridiales | Ruminococcaceae |
| <b>seq1409</b> | Firmicutes    | Clostridia   | Clostridiales | Ruminococcaceae |
| <b>seq1417</b> | Firmicutes    | Clostridia   | Clostridiales | Ruminococcaceae |
| <b>seq1433</b> | Firmicutes    | Clostridia   | Clostridiales | Ruminococcaceae |
| <b>seq1439</b> | Firmicutes    | Clostridia   | Clostridiales | Ruminococcaceae |
| <b>seq1441</b> | Firmicutes    | Clostridia   | Clostridiales | Ruminococcaceae |
| <b>seq1443</b> | Firmicutes    | Clostridia   | Clostridiales | Ruminococcaceae |
| <b>seq1444</b> | Firmicutes    | Clostridia   | Clostridiales | Ruminococcaceae |

Sequence Count Table

|                | <b>Phylum</b> | <b>Class</b> | <b>Genus</b> | <b>Species</b> |
|----------------|---------------|--------------|--------------|----------------|
| <b>seq1247</b> | Firmicutes    | Clostridia   |              |                |
| <b>seq1251</b> | Firmicutes    | Clostridia   |              |                |
| <b>seq1254</b> | Firmicutes    | Clostridia   |              |                |
| <b>seq1258</b> | Firmicutes    | Clostridia   |              |                |
| <b>seq1264</b> | Firmicutes    | Clostridia   |              |                |
| <b>seq1272</b> | Firmicutes    | Clostridia   |              |                |
| <b>seq1274</b> | Firmicutes    | Clostridia   |              |                |
| <b>seq1287</b> | Firmicutes    | Clostridia   |              |                |
| <b>seq1289</b> | Firmicutes    | Clostridia   |              |                |
| <b>seq1299</b> | Firmicutes    | Clostridia   |              |                |
| <b>seq1303</b> | Firmicutes    | Clostridia   |              |                |
| <b>seq1330</b> | Firmicutes    | Clostridia   |              |                |
| <b>seq1331</b> | Firmicutes    | Clostridia   |              |                |
| <b>seq1335</b> | Firmicutes    | Clostridia   |              |                |
| <b>seq1340</b> | Firmicutes    | Clostridia   |              |                |
| <b>seq1344</b> | Firmicutes    | Clostridia   |              |                |
| <b>seq1346</b> | Firmicutes    | Clostridia   |              |                |
| <b>seq1361</b> | Firmicutes    | Clostridia   |              |                |
| <b>seq1363</b> | Firmicutes    | Clostridia   |              |                |
| <b>seq1373</b> | Firmicutes    | Clostridia   |              |                |
| <b>seq1381</b> | Firmicutes    | Clostridia   |              |                |
| <b>seq1383</b> | Firmicutes    | Clostridia   |              |                |
| <b>seq1386</b> | Firmicutes    | Clostridia   |              |                |
| <b>seq1392</b> | Firmicutes    | Clostridia   |              |                |
| <b>seq1398</b> | Firmicutes    | Clostridia   |              |                |
| <b>seq1409</b> | Firmicutes    | Clostridia   |              |                |
| <b>seq1417</b> | Firmicutes    | Clostridia   |              |                |
| <b>seq1433</b> | Firmicutes    | Clostridia   |              |                |
| <b>seq1439</b> | Firmicutes    | Clostridia   |              |                |
| <b>seq1441</b> | Firmicutes    | Clostridia   |              |                |
| <b>seq1443</b> | Firmicutes    | Clostridia   |              |                |
| <b>seq1444</b> | Firmicutes    | Clostridia   |              |                |

Sequence Count Table

|                | <b>Phylum</b> | <b>Class</b> | <b>Subject34WK0</b> | <b>Subject34WK12</b> | <b>Subject16WK0</b> | <b>Subject16WK12</b> |
|----------------|---------------|--------------|---------------------|----------------------|---------------------|----------------------|
| <b>seq1247</b> | Firmicutes    | Clostridia   | 0                   | 0                    | 0                   | 0                    |
| <b>seq1251</b> | Firmicutes    | Clostridia   | 0                   | 0                    | 0                   | 0                    |
| <b>seq1254</b> | Firmicutes    | Clostridia   | 0                   | 0                    | 0                   | 0                    |
| <b>seq1258</b> | Firmicutes    | Clostridia   | 0                   | 0                    | 0                   | 0                    |
| <b>seq1264</b> | Firmicutes    | Clostridia   | 0                   | 0                    | 0                   | 0                    |
| <b>seq1272</b> | Firmicutes    | Clostridia   | 0                   | 0                    | 0                   | 0                    |
| <b>seq1274</b> | Firmicutes    | Clostridia   | 0                   | 0                    | 0                   | 0                    |
| <b>seq1287</b> | Firmicutes    | Clostridia   | 0                   | 0                    | 0                   | 15                   |
| <b>seq1289</b> | Firmicutes    | Clostridia   | 0                   | 0                    | 0                   | 0                    |
| <b>seq1299</b> | Firmicutes    | Clostridia   | 0                   | 0                    | 0                   | 0                    |
| <b>seq1303</b> | Firmicutes    | Clostridia   | 0                   | 0                    | 0                   | 0                    |
| <b>seq1330</b> | Firmicutes    | Clostridia   | 0                   | 0                    | 0                   | 0                    |
| <b>seq1331</b> | Firmicutes    | Clostridia   | 0                   | 0                    | 0                   | 0                    |
| <b>seq1335</b> | Firmicutes    | Clostridia   | 0                   | 0                    | 0                   | 0                    |
| <b>seq1340</b> | Firmicutes    | Clostridia   | 0                   | 0                    | 0                   | 0                    |
| <b>seq1344</b> | Firmicutes    | Clostridia   | 0                   | 0                    | 0                   | 0                    |
| <b>seq1346</b> | Firmicutes    | Clostridia   | 0                   | 0                    | 0                   | 0                    |
| <b>seq1361</b> | Firmicutes    | Clostridia   | 0                   | 0                    | 0                   | 0                    |
| <b>seq1363</b> | Firmicutes    | Clostridia   | 0                   | 0                    | 0                   | 0                    |
| <b>seq1373</b> | Firmicutes    | Clostridia   | 0                   | 0                    | 0                   | 0                    |
| <b>seq1381</b> | Firmicutes    | Clostridia   | 0                   | 0                    | 0                   | 0                    |
| <b>seq1383</b> | Firmicutes    | Clostridia   | 0                   | 0                    | 0                   | 10                   |
| <b>seq1386</b> | Firmicutes    | Clostridia   | 0                   | 0                    | 0                   | 0                    |
| <b>seq1392</b> | Firmicutes    | Clostridia   | 0                   | 0                    | 0                   | 0                    |
| <b>seq1398</b> | Firmicutes    | Clostridia   | 0                   | 0                    | 0                   | 0                    |
| <b>seq1409</b> | Firmicutes    | Clostridia   | 0                   | 0                    | 0                   | 0                    |
| <b>seq1417</b> | Firmicutes    | Clostridia   | 0                   | 0                    | 0                   | 0                    |
| <b>seq1433</b> | Firmicutes    | Clostridia   | 0                   | 0                    | 0                   | 0                    |
| <b>seq1439</b> | Firmicutes    | Clostridia   | 0                   | 0                    | 0                   | 0                    |
| <b>seq1441</b> | Firmicutes    | Clostridia   | 0                   | 0                    | 0                   | 0                    |
| <b>seq1443</b> | Firmicutes    | Clostridia   | 0                   | 0                    | 0                   | 0                    |
| <b>seq1444</b> | Firmicutes    | Clostridia   | 0                   | 0                    | 0                   | 0                    |

Sequence Count Table

|                | <b>Phylum</b> | <b>Class</b> | <b>Subject17WK0</b> | <b>Subject17WK12</b> | <b>Subject1WK0</b> | <b>Subject1WK12</b> |
|----------------|---------------|--------------|---------------------|----------------------|--------------------|---------------------|
| <b>seq1247</b> | Firmicutes    | Clostridia   | 0                   | 0                    | 0                  | 0                   |
| <b>seq1251</b> | Firmicutes    | Clostridia   | 5                   | 0                    | 0                  | 0                   |
| <b>seq1254</b> | Firmicutes    | Clostridia   | 12                  | 5                    | 0                  | 0                   |
| <b>seq1258</b> | Firmicutes    | Clostridia   | 0                   | 0                    | 0                  | 0                   |
| <b>seq1264</b> | Firmicutes    | Clostridia   | 7                   | 0                    | 0                  | 0                   |
| <b>seq1272</b> | Firmicutes    | Clostridia   | 0                   | 0                    | 0                  | 0                   |
| <b>seq1274</b> | Firmicutes    | Clostridia   | 0                   | 0                    | 0                  | 0                   |
| <b>seq1287</b> | Firmicutes    | Clostridia   | 11                  | 24                   | 9                  | 0                   |
| <b>seq1289</b> | Firmicutes    | Clostridia   | 0                   | 0                    | 0                  | 0                   |
| <b>seq1299</b> | Firmicutes    | Clostridia   | 0                   | 0                    | 0                  | 0                   |
| <b>seq1303</b> | Firmicutes    | Clostridia   | 0                   | 0                    | 16                 | 12                  |
| <b>seq1330</b> | Firmicutes    | Clostridia   | 0                   | 0                    | 0                  | 0                   |
| <b>seq1331</b> | Firmicutes    | Clostridia   | 0                   | 0                    | 0                  | 0                   |
| <b>seq1335</b> | Firmicutes    | Clostridia   | 0                   | 0                    | 0                  | 0                   |
| <b>seq1340</b> | Firmicutes    | Clostridia   | 0                   | 0                    | 0                  | 0                   |
| <b>seq1344</b> | Firmicutes    | Clostridia   | 0                   | 0                    | 0                  | 0                   |
| <b>seq1346</b> | Firmicutes    | Clostridia   | 0                   | 0                    | 0                  | 0                   |
| <b>seq1361</b> | Firmicutes    | Clostridia   | 0                   | 0                    | 0                  | 0                   |
| <b>seq1363</b> | Firmicutes    | Clostridia   | 46                  | 0                    | 0                  | 0                   |
| <b>seq1373</b> | Firmicutes    | Clostridia   | 0                   | 0                    | 0                  | 0                   |
| <b>seq1381</b> | Firmicutes    | Clostridia   | 0                   | 0                    | 0                  | 0                   |
| <b>seq1383</b> | Firmicutes    | Clostridia   | 0                   | 0                    | 0                  | 0                   |
| <b>seq1386</b> | Firmicutes    | Clostridia   | 0                   | 0                    | 0                  | 0                   |
| <b>seq1392</b> | Firmicutes    | Clostridia   | 0                   | 0                    | 13                 | 0                   |
| <b>seq1398</b> | Firmicutes    | Clostridia   | 0                   | 0                    | 0                  | 0                   |
| <b>seq1409</b> | Firmicutes    | Clostridia   | 0                   | 0                    | 0                  | 0                   |
| <b>seq1417</b> | Firmicutes    | Clostridia   | 0                   | 0                    | 0                  | 0                   |
| <b>seq1433</b> | Firmicutes    | Clostridia   | 0                   | 0                    | 0                  | 0                   |
| <b>seq1439</b> | Firmicutes    | Clostridia   | 0                   | 0                    | 0                  | 0                   |
| <b>seq1441</b> | Firmicutes    | Clostridia   | 0                   | 0                    | 13                 | 13                  |
| <b>seq1443</b> | Firmicutes    | Clostridia   | 0                   | 0                    | 0                  | 0                   |
| <b>seq1444</b> | Firmicutes    | Clostridia   | 0                   | 0                    | 0                  | 0                   |



Sequence Count Table

|                | <b>Phylum</b> | <b>Class</b> | <b>Subject2WK0</b> | <b>Subject2WK12</b> | <b>Subject3WK0</b> | <b>Subject3WK12</b> |
|----------------|---------------|--------------|--------------------|---------------------|--------------------|---------------------|
| <b>seq1247</b> | Firmicutes    | Clostridia   | 0                  | 0                   | 0                  | 0                   |
| <b>seq1251</b> | Firmicutes    | Clostridia   | 0                  | 0                   | 0                  | 0                   |
| <b>seq1254</b> | Firmicutes    | Clostridia   | 0                  | 0                   | 0                  | 0                   |
| <b>seq1258</b> | Firmicutes    | Clostridia   | 0                  | 0                   | 0                  | 0                   |
| <b>seq1264</b> | Firmicutes    | Clostridia   | 0                  | 0                   | 0                  | 0                   |
| <b>seq1272</b> | Firmicutes    | Clostridia   | 0                  | 0                   | 0                  | 0                   |
| <b>seq1274</b> | Firmicutes    | Clostridia   | 0                  | 0                   | 0                  | 0                   |
| <b>seq1287</b> | Firmicutes    | Clostridia   | 0                  | 0                   | 0                  | 0                   |
| <b>seq1289</b> | Firmicutes    | Clostridia   | 0                  | 0                   | 0                  | 0                   |
| <b>seq1299</b> | Firmicutes    | Clostridia   | 0                  | 0                   | 0                  | 0                   |
| <b>seq1303</b> | Firmicutes    | Clostridia   | 0                  | 0                   | 0                  | 0                   |
| <b>seq1330</b> | Firmicutes    | Clostridia   | 0                  | 0                   | 0                  | 0                   |
| <b>seq1331</b> | Firmicutes    | Clostridia   | 0                  | 0                   | 0                  | 0                   |
| <b>seq1335</b> | Firmicutes    | Clostridia   | 0                  | 0                   | 0                  | 0                   |
| <b>seq1340</b> | Firmicutes    | Clostridia   | 0                  | 0                   | 0                  | 0                   |
| <b>seq1344</b> | Firmicutes    | Clostridia   | 0                  | 0                   | 0                  | 0                   |
| <b>seq1346</b> | Firmicutes    | Clostridia   | 0                  | 0                   | 0                  | 0                   |
| <b>seq1361</b> | Firmicutes    | Clostridia   | 0                  | 0                   | 0                  | 0                   |
| <b>seq1363</b> | Firmicutes    | Clostridia   | 0                  | 0                   | 0                  | 0                   |
| <b>seq1373</b> | Firmicutes    | Clostridia   | 0                  | 0                   | 0                  | 0                   |
| <b>seq1381</b> | Firmicutes    | Clostridia   | 0                  | 0                   | 0                  | 0                   |
| <b>seq1383</b> | Firmicutes    | Clostridia   | 0                  | 0                   | 0                  | 0                   |
| <b>seq1386</b> | Firmicutes    | Clostridia   | 0                  | 0                   | 0                  | 0                   |
| <b>seq1392</b> | Firmicutes    | Clostridia   | 0                  | 0                   | 0                  | 0                   |
| <b>seq1398</b> | Firmicutes    | Clostridia   | 0                  | 0                   | 0                  | 0                   |
| <b>seq1409</b> | Firmicutes    | Clostridia   | 0                  | 0                   | 0                  | 0                   |
| <b>seq1417</b> | Firmicutes    | Clostridia   | 0                  | 0                   | 0                  | 0                   |
| <b>seq1433</b> | Firmicutes    | Clostridia   | 0                  | 0                   | 0                  | 0                   |
| <b>seq1439</b> | Firmicutes    | Clostridia   | 0                  | 0                   | 0                  | 0                   |
| <b>seq1441</b> | Firmicutes    | Clostridia   | 0                  | 0                   | 0                  | 0                   |
| <b>seq1443</b> | Firmicutes    | Clostridia   | 0                  | 0                   | 0                  | 0                   |
| <b>seq1444</b> | Firmicutes    | Clostridia   | 0                  | 0                   | 0                  | 0                   |

Sequence Count Table

|                | <b>Phylum</b> | <b>Class</b> | <b>Subject4WK0</b> | <b>Subject4WK12</b> | <b>Subject5WK0</b> | <b>Subject5WK12</b> |
|----------------|---------------|--------------|--------------------|---------------------|--------------------|---------------------|
| <b>seq1247</b> | Firmicutes    | Clostridia   | 0                  | 0                   | 0                  | 0                   |
| <b>seq1251</b> | Firmicutes    | Clostridia   | 0                  | 0                   | 0                  | 0                   |
| <b>seq1254</b> | Firmicutes    | Clostridia   | 2                  | 10                  | 0                  | 0                   |
| <b>seq1258</b> | Firmicutes    | Clostridia   | 0                  | 0                   | 0                  | 0                   |
| <b>seq1264</b> | Firmicutes    | Clostridia   | 15                 | 0                   | 0                  | 0                   |
| <b>seq1272</b> | Firmicutes    | Clostridia   | 63                 | 0                   | 0                  | 0                   |
| <b>seq1274</b> | Firmicutes    | Clostridia   | 0                  | 0                   | 0                  | 0                   |
| <b>seq1287</b> | Firmicutes    | Clostridia   | 0                  | 0                   | 0                  | 0                   |
| <b>seq1289</b> | Firmicutes    | Clostridia   | 27                 | 32                  | 0                  | 0                   |
| <b>seq1299</b> | Firmicutes    | Clostridia   | 0                  | 0                   | 0                  | 0                   |
| <b>seq1303</b> | Firmicutes    | Clostridia   | 0                  | 0                   | 0                  | 0                   |
| <b>seq1330</b> | Firmicutes    | Clostridia   | 0                  | 0                   | 0                  | 0                   |
| <b>seq1331</b> | Firmicutes    | Clostridia   | 0                  | 0                   | 0                  | 0                   |
| <b>seq1335</b> | Firmicutes    | Clostridia   | 0                  | 0                   | 0                  | 0                   |
| <b>seq1340</b> | Firmicutes    | Clostridia   | 0                  | 0                   | 0                  | 0                   |
| <b>seq1344</b> | Firmicutes    | Clostridia   | 5                  | 0                   | 0                  | 0                   |
| <b>seq1346</b> | Firmicutes    | Clostridia   | 0                  | 0                   | 0                  | 0                   |
| <b>seq1361</b> | Firmicutes    | Clostridia   | 0                  | 0                   | 0                  | 0                   |
| <b>seq1363</b> | Firmicutes    | Clostridia   | 0                  | 0                   | 0                  | 0                   |
| <b>seq1373</b> | Firmicutes    | Clostridia   | 0                  | 0                   | 0                  | 0                   |
| <b>seq1381</b> | Firmicutes    | Clostridia   | 0                  | 0                   | 0                  | 0                   |
| <b>seq1383</b> | Firmicutes    | Clostridia   | 0                  | 0                   | 0                  | 0                   |
| <b>seq1386</b> | Firmicutes    | Clostridia   | 0                  | 0                   | 0                  | 0                   |
| <b>seq1392</b> | Firmicutes    | Clostridia   | 0                  | 0                   | 0                  | 0                   |
| <b>seq1398</b> | Firmicutes    | Clostridia   | 0                  | 0                   | 27                 | 14                  |
| <b>seq1409</b> | Firmicutes    | Clostridia   | 0                  | 0                   | 0                  | 0                   |
| <b>seq1417</b> | Firmicutes    | Clostridia   | 0                  | 0                   | 0                  | 0                   |
| <b>seq1433</b> | Firmicutes    | Clostridia   | 0                  | 0                   | 0                  | 0                   |
| <b>seq1439</b> | Firmicutes    | Clostridia   | 0                  | 0                   | 0                  | 0                   |
| <b>seq1441</b> | Firmicutes    | Clostridia   | 0                  | 0                   | 0                  | 0                   |
| <b>seq1443</b> | Firmicutes    | Clostridia   | 0                  | 0                   | 0                  | 0                   |
| <b>seq1444</b> | Firmicutes    | Clostridia   | 0                  | 0                   | 0                  | 0                   |

Sequence Count Table

|                | <b>Phylum</b> | <b>Class</b> | <b>Subject6WK0</b> | <b>Subject6WK12</b> | <b>Subject18WK0</b> | <b>Subject18WK12</b> |
|----------------|---------------|--------------|--------------------|---------------------|---------------------|----------------------|
| <b>seq1247</b> | Firmicutes    | Clostridia   | 0                  | 0                   | 0                   | 0                    |
| <b>seq1251</b> | Firmicutes    | Clostridia   | 0                  | 10                  | 0                   | 0                    |
| <b>seq1254</b> | Firmicutes    | Clostridia   | 0                  | 0                   | 0                   | 0                    |
| <b>seq1258</b> | Firmicutes    | Clostridia   | 0                  | 0                   | 0                   | 0                    |
| <b>seq1264</b> | Firmicutes    | Clostridia   | 0                  | 0                   | 0                   | 0                    |
| <b>seq1272</b> | Firmicutes    | Clostridia   | 0                  | 0                   | 0                   | 0                    |
| <b>seq1274</b> | Firmicutes    | Clostridia   | 0                  | 0                   | 0                   | 0                    |
| <b>seq1287</b> | Firmicutes    | Clostridia   | 0                  | 0                   | 0                   | 0                    |
| <b>seq1289</b> | Firmicutes    | Clostridia   | 0                  | 0                   | 0                   | 0                    |
| <b>seq1299</b> | Firmicutes    | Clostridia   | 8                  | 0                   | 0                   | 0                    |
| <b>seq1303</b> | Firmicutes    | Clostridia   | 0                  | 0                   | 0                   | 0                    |
| <b>seq1330</b> | Firmicutes    | Clostridia   | 15                 | 12                  | 0                   | 0                    |
| <b>seq1331</b> | Firmicutes    | Clostridia   | 0                  | 10                  | 0                   | 0                    |
| <b>seq1335</b> | Firmicutes    | Clostridia   | 0                  | 0                   | 0                   | 0                    |
| <b>seq1340</b> | Firmicutes    | Clostridia   | 0                  | 33                  | 0                   | 0                    |
| <b>seq1344</b> | Firmicutes    | Clostridia   | 0                  | 6                   | 0                   | 0                    |
| <b>seq1346</b> | Firmicutes    | Clostridia   | 14                 | 11                  | 0                   | 0                    |
| <b>seq1361</b> | Firmicutes    | Clostridia   | 0                  | 0                   | 0                   | 0                    |
| <b>seq1363</b> | Firmicutes    | Clostridia   | 0                  | 0                   | 0                   | 0                    |
| <b>seq1373</b> | Firmicutes    | Clostridia   | 0                  | 0                   | 0                   | 0                    |
| <b>seq1381</b> | Firmicutes    | Clostridia   | 0                  | 0                   | 0                   | 0                    |
| <b>seq1383</b> | Firmicutes    | Clostridia   | 22                 | 11                  | 0                   | 0                    |
| <b>seq1386</b> | Firmicutes    | Clostridia   | 0                  | 9                   | 0                   | 0                    |
| <b>seq1392</b> | Firmicutes    | Clostridia   | 0                  | 0                   | 0                   | 0                    |
| <b>seq1398</b> | Firmicutes    | Clostridia   | 0                  | 0                   | 0                   | 0                    |
| <b>seq1409</b> | Firmicutes    | Clostridia   | 0                  | 0                   | 0                   | 0                    |
| <b>seq1417</b> | Firmicutes    | Clostridia   | 19                 | 0                   | 0                   | 0                    |
| <b>seq1433</b> | Firmicutes    | Clostridia   | 0                  | 0                   | 0                   | 0                    |
| <b>seq1439</b> | Firmicutes    | Clostridia   | 0                  | 0                   | 0                   | 0                    |
| <b>seq1441</b> | Firmicutes    | Clostridia   | 0                  | 0                   | 0                   | 0                    |
| <b>seq1443</b> | Firmicutes    | Clostridia   | 0                  | 0                   | 0                   | 0                    |
| <b>seq1444</b> | Firmicutes    | Clostridia   | 0                  | 0                   | 0                   | 0                    |

Sequence Count Table

|                | <b>Phylum</b> | <b>Class</b> | <b>Subject19WK0</b> | <b>Subject19WK12</b> | <b>Subject20WK0</b> | <b>Subject20WK12</b> |
|----------------|---------------|--------------|---------------------|----------------------|---------------------|----------------------|
| <b>seq1247</b> | Firmicutes    | Clostridia   | 0                   | 0                    | 0                   | 0                    |
| <b>seq1251</b> | Firmicutes    | Clostridia   | 0                   | 0                    | 5                   | 0                    |
| <b>seq1254</b> | Firmicutes    | Clostridia   | 0                   | 0                    | 0                   | 0                    |
| <b>seq1258</b> | Firmicutes    | Clostridia   | 0                   | 0                    | 0                   | 0                    |
| <b>seq1264</b> | Firmicutes    | Clostridia   | 0                   | 0                    | 0                   | 0                    |
| <b>seq1272</b> | Firmicutes    | Clostridia   | 0                   | 0                    | 0                   | 0                    |
| <b>seq1274</b> | Firmicutes    | Clostridia   | 0                   | 0                    | 20                  | 0                    |
| <b>seq1287</b> | Firmicutes    | Clostridia   | 0                   | 0                    | 0                   | 0                    |
| <b>seq1289</b> | Firmicutes    | Clostridia   | 0                   | 0                    | 0                   | 0                    |
| <b>seq1299</b> | Firmicutes    | Clostridia   | 0                   | 0                    | 0                   | 0                    |
| <b>seq1303</b> | Firmicutes    | Clostridia   | 0                   | 0                    | 0                   | 0                    |
| <b>seq1330</b> | Firmicutes    | Clostridia   | 0                   | 0                    | 0                   | 0                    |
| <b>seq1331</b> | Firmicutes    | Clostridia   | 0                   | 0                    | 8                   | 0                    |
| <b>seq1335</b> | Firmicutes    | Clostridia   | 0                   | 0                    | 0                   | 0                    |
| <b>seq1340</b> | Firmicutes    | Clostridia   | 0                   | 0                    | 0                   | 0                    |
| <b>seq1344</b> | Firmicutes    | Clostridia   | 0                   | 0                    | 0                   | 0                    |
| <b>seq1346</b> | Firmicutes    | Clostridia   | 0                   | 0                    | 0                   | 0                    |
| <b>seq1361</b> | Firmicutes    | Clostridia   | 0                   | 0                    | 0                   | 0                    |
| <b>seq1363</b> | Firmicutes    | Clostridia   | 0                   | 0                    | 0                   | 0                    |
| <b>seq1373</b> | Firmicutes    | Clostridia   | 0                   | 0                    | 45                  | 0                    |
| <b>seq1381</b> | Firmicutes    | Clostridia   | 0                   | 0                    | 0                   | 0                    |
| <b>seq1383</b> | Firmicutes    | Clostridia   | 0                   | 0                    | 0                   | 0                    |
| <b>seq1386</b> | Firmicutes    | Clostridia   | 0                   | 0                    | 0                   | 0                    |
| <b>seq1392</b> | Firmicutes    | Clostridia   | 0                   | 0                    | 0                   | 0                    |
| <b>seq1398</b> | Firmicutes    | Clostridia   | 0                   | 0                    | 0                   | 0                    |
| <b>seq1409</b> | Firmicutes    | Clostridia   | 0                   | 0                    | 0                   | 0                    |
| <b>seq1417</b> | Firmicutes    | Clostridia   | 0                   | 0                    | 0                   | 0                    |
| <b>seq1433</b> | Firmicutes    | Clostridia   | 0                   | 0                    | 19                  | 0                    |
| <b>seq1439</b> | Firmicutes    | Clostridia   | 0                   | 0                    | 0                   | 0                    |
| <b>seq1441</b> | Firmicutes    | Clostridia   | 0                   | 0                    | 0                   | 0                    |
| <b>seq1443</b> | Firmicutes    | Clostridia   | 0                   | 0                    | 35                  | 0                    |
| <b>seq1444</b> | Firmicutes    | Clostridia   | 0                   | 0                    | 0                   | 29                   |

Sequence Count Table

|                | <b>Phylum</b> | <b>Class</b> | <b>Subject7WK0</b> | <b>Subject7WK12</b> | <b>Subject21WK0</b> | <b>Subject21WK12</b> |
|----------------|---------------|--------------|--------------------|---------------------|---------------------|----------------------|
| <b>seq1247</b> | Firmicutes    | Clostridia   | 47                 | 0                   | 0                   | 0                    |
| <b>seq1251</b> | Firmicutes    | Clostridia   | 0                  | 0                   | 0                   | 0                    |
| <b>seq1254</b> | Firmicutes    | Clostridia   | 7                  | 4                   | 0                   | 0                    |
| <b>seq1258</b> | Firmicutes    | Clostridia   | 0                  | 0                   | 0                   | 0                    |
| <b>seq1264</b> | Firmicutes    | Clostridia   | 0                  | 0                   | 0                   | 0                    |
| <b>seq1272</b> | Firmicutes    | Clostridia   | 0                  | 0                   | 0                   | 0                    |
| <b>seq1274</b> | Firmicutes    | Clostridia   | 0                  | 0                   | 0                   | 0                    |
| <b>seq1287</b> | Firmicutes    | Clostridia   | 0                  | 0                   | 0                   | 0                    |
| <b>seq1289</b> | Firmicutes    | Clostridia   | 0                  | 0                   | 0                   | 0                    |
| <b>seq1299</b> | Firmicutes    | Clostridia   | 0                  | 0                   | 0                   | 0                    |
| <b>seq1303</b> | Firmicutes    | Clostridia   | 0                  | 0                   | 0                   | 0                    |
| <b>seq1330</b> | Firmicutes    | Clostridia   | 0                  | 0                   | 0                   | 0                    |
| <b>seq1331</b> | Firmicutes    | Clostridia   | 0                  | 0                   | 0                   | 0                    |
| <b>seq1335</b> | Firmicutes    | Clostridia   | 0                  | 0                   | 0                   | 0                    |
| <b>seq1340</b> | Firmicutes    | Clostridia   | 0                  | 0                   | 0                   | 0                    |
| <b>seq1344</b> | Firmicutes    | Clostridia   | 0                  | 0                   | 0                   | 0                    |
| <b>seq1346</b> | Firmicutes    | Clostridia   | 0                  | 0                   | 0                   | 0                    |
| <b>seq1361</b> | Firmicutes    | Clostridia   | 0                  | 0                   | 0                   | 0                    |
| <b>seq1363</b> | Firmicutes    | Clostridia   | 0                  | 0                   | 0                   | 0                    |
| <b>seq1373</b> | Firmicutes    | Clostridia   | 0                  | 0                   | 0                   | 0                    |
| <b>seq1381</b> | Firmicutes    | Clostridia   | 0                  | 0                   | 0                   | 0                    |
| <b>seq1383</b> | Firmicutes    | Clostridia   | 0                  | 0                   | 0                   | 0                    |
| <b>seq1386</b> | Firmicutes    | Clostridia   | 0                  | 0                   | 0                   | 0                    |
| <b>seq1392</b> | Firmicutes    | Clostridia   | 0                  | 0                   | 0                   | 0                    |
| <b>seq1398</b> | Firmicutes    | Clostridia   | 0                  | 0                   | 0                   | 0                    |
| <b>seq1409</b> | Firmicutes    | Clostridia   | 0                  | 0                   | 0                   | 0                    |
| <b>seq1417</b> | Firmicutes    | Clostridia   | 0                  | 0                   | 0                   | 0                    |
| <b>seq1433</b> | Firmicutes    | Clostridia   | 0                  | 0                   | 0                   | 0                    |
| <b>seq1439</b> | Firmicutes    | Clostridia   | 0                  | 0                   | 0                   | 0                    |
| <b>seq1441</b> | Firmicutes    | Clostridia   | 0                  | 0                   | 0                   | 0                    |
| <b>seq1443</b> | Firmicutes    | Clostridia   | 0                  | 0                   | 0                   | 0                    |
| <b>seq1444</b> | Firmicutes    | Clostridia   | 0                  | 6                   | 0                   | 0                    |

Sequence Count Table

|                | <b>Phylum</b> | <b>Class</b> | <b>Subject8WK0</b> | <b>Subject8WK12</b> | <b>Subject9WK0</b> | <b>Subject9WK12</b> |
|----------------|---------------|--------------|--------------------|---------------------|--------------------|---------------------|
| <b>seq1247</b> | Firmicutes    | Clostridia   | 0                  | 0                   | 0                  | 0                   |
| <b>seq1251</b> | Firmicutes    | Clostridia   | 0                  | 0                   | 0                  | 0                   |
| <b>seq1254</b> | Firmicutes    | Clostridia   | 0                  | 0                   | 3                  | 0                   |
| <b>seq1258</b> | Firmicutes    | Clostridia   | 0                  | 0                   | 0                  | 0                   |
| <b>seq1264</b> | Firmicutes    | Clostridia   | 0                  | 0                   | 0                  | 0                   |
| <b>seq1272</b> | Firmicutes    | Clostridia   | 0                  | 0                   | 0                  | 0                   |
| <b>seq1274</b> | Firmicutes    | Clostridia   | 0                  | 0                   | 0                  | 0                   |
| <b>seq1287</b> | Firmicutes    | Clostridia   | 0                  | 0                   | 0                  | 0                   |
| <b>seq1289</b> | Firmicutes    | Clostridia   | 0                  | 0                   | 0                  | 0                   |
| <b>seq1299</b> | Firmicutes    | Clostridia   | 0                  | 0                   | 0                  | 0                   |
| <b>seq1303</b> | Firmicutes    | Clostridia   | 0                  | 0                   | 0                  | 0                   |
| <b>seq1330</b> | Firmicutes    | Clostridia   | 0                  | 0                   | 0                  | 0                   |
| <b>seq1331</b> | Firmicutes    | Clostridia   | 0                  | 0                   | 0                  | 0                   |
| <b>seq1335</b> | Firmicutes    | Clostridia   | 0                  | 0                   | 0                  | 0                   |
| <b>seq1340</b> | Firmicutes    | Clostridia   | 0                  | 0                   | 0                  | 0                   |
| <b>seq1344</b> | Firmicutes    | Clostridia   | 0                  | 0                   | 0                  | 0                   |
| <b>seq1346</b> | Firmicutes    | Clostridia   | 0                  | 0                   | 0                  | 0                   |
| <b>seq1361</b> | Firmicutes    | Clostridia   | 0                  | 0                   | 0                  | 0                   |
| <b>seq1363</b> | Firmicutes    | Clostridia   | 0                  | 0                   | 0                  | 0                   |
| <b>seq1373</b> | Firmicutes    | Clostridia   | 0                  | 0                   | 0                  | 0                   |
| <b>seq1381</b> | Firmicutes    | Clostridia   | 0                  | 0                   | 0                  | 0                   |
| <b>seq1383</b> | Firmicutes    | Clostridia   | 0                  | 0                   | 0                  | 0                   |
| <b>seq1386</b> | Firmicutes    | Clostridia   | 0                  | 0                   | 0                  | 0                   |
| <b>seq1392</b> | Firmicutes    | Clostridia   | 0                  | 0                   | 0                  | 0                   |
| <b>seq1398</b> | Firmicutes    | Clostridia   | 0                  | 0                   | 0                  | 0                   |
| <b>seq1409</b> | Firmicutes    | Clostridia   | 0                  | 0                   | 0                  | 0                   |
| <b>seq1417</b> | Firmicutes    | Clostridia   | 0                  | 0                   | 0                  | 0                   |
| <b>seq1433</b> | Firmicutes    | Clostridia   | 0                  | 0                   | 0                  | 0                   |
| <b>seq1439</b> | Firmicutes    | Clostridia   | 0                  | 0                   | 0                  | 0                   |
| <b>seq1441</b> | Firmicutes    | Clostridia   | 0                  | 0                   | 0                  | 0                   |
| <b>seq1443</b> | Firmicutes    | Clostridia   | 0                  | 0                   | 0                  | 0                   |
| <b>seq1444</b> | Firmicutes    | Clostridia   | 0                  | 0                   | 0                  | 0                   |

Sequence Count Table

|                | <b>Phylum</b> | <b>Class</b> | <b>Subject10WK0</b> | <b>Subject10WK12</b> | <b>Subject22WK0</b> | <b>Subject22WK12</b> |
|----------------|---------------|--------------|---------------------|----------------------|---------------------|----------------------|
| <b>seq1247</b> | Firmicutes    | Clostridia   | 0                   | 0                    | 0                   | 0                    |
| <b>seq1251</b> | Firmicutes    | Clostridia   | 0                   | 0                    | 9                   | 0                    |
| <b>seq1254</b> | Firmicutes    | Clostridia   | 0                   | 0                    | 0                   | 0                    |
| <b>seq1258</b> | Firmicutes    | Clostridia   | 0                   | 0                    | 0                   | 0                    |
| <b>seq1264</b> | Firmicutes    | Clostridia   | 0                   | 0                    | 0                   | 0                    |
| <b>seq1272</b> | Firmicutes    | Clostridia   | 0                   | 0                    | 0                   | 0                    |
| <b>seq1274</b> | Firmicutes    | Clostridia   | 0                   | 0                    | 0                   | 20                   |
| <b>seq1287</b> | Firmicutes    | Clostridia   | 0                   | 0                    | 0                   | 0                    |
| <b>seq1289</b> | Firmicutes    | Clostridia   | 0                   | 0                    | 0                   | 0                    |
| <b>seq1299</b> | Firmicutes    | Clostridia   | 0                   | 0                    | 0                   | 0                    |
| <b>seq1303</b> | Firmicutes    | Clostridia   | 18                  | 10                   | 0                   | 0                    |
| <b>seq1330</b> | Firmicutes    | Clostridia   | 0                   | 0                    | 15                  | 9                    |
| <b>seq1331</b> | Firmicutes    | Clostridia   | 0                   | 0                    | 0                   | 0                    |
| <b>seq1335</b> | Firmicutes    | Clostridia   | 0                   | 0                    | 0                   | 0                    |
| <b>seq1340</b> | Firmicutes    | Clostridia   | 0                   | 0                    | 0                   | 0                    |
| <b>seq1344</b> | Firmicutes    | Clostridia   | 0                   | 0                    | 0                   | 0                    |
| <b>seq1346</b> | Firmicutes    | Clostridia   | 0                   | 0                    | 24                  | 0                    |
| <b>seq1361</b> | Firmicutes    | Clostridia   | 0                   | 0                    | 0                   | 0                    |
| <b>seq1363</b> | Firmicutes    | Clostridia   | 0                   | 0                    | 0                   | 0                    |
| <b>seq1373</b> | Firmicutes    | Clostridia   | 0                   | 0                    | 0                   | 0                    |
| <b>seq1381</b> | Firmicutes    | Clostridia   | 0                   | 0                    | 0                   | 0                    |
| <b>seq1383</b> | Firmicutes    | Clostridia   | 0                   | 0                    | 0                   | 0                    |
| <b>seq1386</b> | Firmicutes    | Clostridia   | 0                   | 0                    | 0                   | 0                    |
| <b>seq1392</b> | Firmicutes    | Clostridia   | 0                   | 0                    | 0                   | 0                    |
| <b>seq1398</b> | Firmicutes    | Clostridia   | 0                   | 0                    | 0                   | 0                    |
| <b>seq1409</b> | Firmicutes    | Clostridia   | 0                   | 0                    | 19                  | 21                   |
| <b>seq1417</b> | Firmicutes    | Clostridia   | 0                   | 0                    | 0                   | 0                    |
| <b>seq1433</b> | Firmicutes    | Clostridia   | 0                   | 0                    | 0                   | 0                    |
| <b>seq1439</b> | Firmicutes    | Clostridia   | 0                   | 0                    | 0                   | 0                    |
| <b>seq1441</b> | Firmicutes    | Clostridia   | 9                   | 0                    | 0                   | 0                    |
| <b>seq1443</b> | Firmicutes    | Clostridia   | 0                   | 0                    | 0                   | 0                    |
| <b>seq1444</b> | Firmicutes    | Clostridia   | 0                   | 0                    | 0                   | 0                    |

Sequence Count Table

|                | <b>Phylum</b> | <b>Class</b> | <b>Subject23WK0</b> | <b>Subject23WK12</b> | <b>Subject24WK0</b> | <b>Subject24WK12</b> |
|----------------|---------------|--------------|---------------------|----------------------|---------------------|----------------------|
| <b>seq1247</b> | Firmicutes    | Clostridia   | 0                   | 0                    | 0                   | 0                    |
| <b>seq1251</b> | Firmicutes    | Clostridia   | 0                   | 0                    | 0                   | 5                    |
| <b>seq1254</b> | Firmicutes    | Clostridia   | 0                   | 10                   | 0                   | 0                    |
| <b>seq1258</b> | Firmicutes    | Clostridia   | 0                   | 0                    | 0                   | 0                    |
| <b>seq1264</b> | Firmicutes    | Clostridia   | 0                   | 0                    | 0                   | 0                    |
| <b>seq1272</b> | Firmicutes    | Clostridia   | 0                   | 0                    | 0                   | 0                    |
| <b>seq1274</b> | Firmicutes    | Clostridia   | 0                   | 0                    | 0                   | 0                    |
| <b>seq1287</b> | Firmicutes    | Clostridia   | 0                   | 0                    | 0                   | 0                    |
| <b>seq1289</b> | Firmicutes    | Clostridia   | 0                   | 0                    | 0                   | 0                    |
| <b>seq1299</b> | Firmicutes    | Clostridia   | 0                   | 6                    | 0                   | 0                    |
| <b>seq1303</b> | Firmicutes    | Clostridia   | 0                   | 0                    | 0                   | 0                    |
| <b>seq1330</b> | Firmicutes    | Clostridia   | 0                   | 0                    | 0                   | 0                    |
| <b>seq1331</b> | Firmicutes    | Clostridia   | 0                   | 0                    | 0                   | 0                    |
| <b>seq1335</b> | Firmicutes    | Clostridia   | 0                   | 0                    | 0                   | 0                    |
| <b>seq1340</b> | Firmicutes    | Clostridia   | 0                   | 0                    | 0                   | 0                    |
| <b>seq1344</b> | Firmicutes    | Clostridia   | 0                   | 0                    | 6                   | 18                   |
| <b>seq1346</b> | Firmicutes    | Clostridia   | 0                   | 0                    | 0                   | 0                    |
| <b>seq1361</b> | Firmicutes    | Clostridia   | 0                   | 0                    | 0                   | 0                    |
| <b>seq1363</b> | Firmicutes    | Clostridia   | 0                   | 0                    | 0                   | 0                    |
| <b>seq1373</b> | Firmicutes    | Clostridia   | 0                   | 0                    | 0                   | 0                    |
| <b>seq1381</b> | Firmicutes    | Clostridia   | 0                   | 0                    | 0                   | 0                    |
| <b>seq1383</b> | Firmicutes    | Clostridia   | 0                   | 0                    | 0                   | 0                    |
| <b>seq1386</b> | Firmicutes    | Clostridia   | 0                   | 11                   | 0                   | 0                    |
| <b>seq1392</b> | Firmicutes    | Clostridia   | 0                   | 0                    | 0                   | 0                    |
| <b>seq1398</b> | Firmicutes    | Clostridia   | 0                   | 0                    | 0                   | 0                    |
| <b>seq1409</b> | Firmicutes    | Clostridia   | 0                   | 0                    | 0                   | 0                    |
| <b>seq1417</b> | Firmicutes    | Clostridia   | 0                   | 0                    | 0                   | 0                    |
| <b>seq1433</b> | Firmicutes    | Clostridia   | 0                   | 0                    | 0                   | 0                    |
| <b>seq1439</b> | Firmicutes    | Clostridia   | 0                   | 0                    | 20                  | 16                   |
| <b>seq1441</b> | Firmicutes    | Clostridia   | 0                   | 0                    | 0                   | 0                    |
| <b>seq1443</b> | Firmicutes    | Clostridia   | 0                   | 0                    | 0                   | 0                    |
| <b>seq1444</b> | Firmicutes    | Clostridia   | 0                   | 0                    | 0                   | 0                    |



Sequence Count Table

|                | <b>Phylum</b> | <b>Class</b> | <b>Subject11WK0</b> | <b>Subject11WK12</b> | <b>Subject12WK0</b> | <b>Subject12WK12</b> |
|----------------|---------------|--------------|---------------------|----------------------|---------------------|----------------------|
| <b>seq1247</b> | Firmicutes    | Clostridia   | 0                   | 0                    | 0                   | 0                    |
| <b>seq1251</b> | Firmicutes    | Clostridia   | 0                   | 0                    | 0                   | 0                    |
| <b>seq1254</b> | Firmicutes    | Clostridia   | 0                   | 0                    | 0                   | 0                    |
| <b>seq1258</b> | Firmicutes    | Clostridia   | 66                  | 0                    | 0                   | 0                    |
| <b>seq1264</b> | Firmicutes    | Clostridia   | 0                   | 0                    | 0                   | 0                    |
| <b>seq1272</b> | Firmicutes    | Clostridia   | 0                   | 0                    | 0                   | 0                    |
| <b>seq1274</b> | Firmicutes    | Clostridia   | 0                   | 0                    | 0                   | 0                    |
| <b>seq1287</b> | Firmicutes    | Clostridia   | 0                   | 0                    | 0                   | 0                    |
| <b>seq1289</b> | Firmicutes    | Clostridia   | 0                   | 0                    | 0                   | 0                    |
| <b>seq1299</b> | Firmicutes    | Clostridia   | 0                   | 0                    | 0                   | 0                    |
| <b>seq1303</b> | Firmicutes    | Clostridia   | 0                   | 0                    | 0                   | 0                    |
| <b>seq1330</b> | Firmicutes    | Clostridia   | 0                   | 0                    | 0                   | 0                    |
| <b>seq1331</b> | Firmicutes    | Clostridia   | 0                   | 0                    | 14                  | 4                    |
| <b>seq1335</b> | Firmicutes    | Clostridia   | 0                   | 0                    | 0                   | 0                    |
| <b>seq1340</b> | Firmicutes    | Clostridia   | 0                   | 0                    | 0                   | 0                    |
| <b>seq1344</b> | Firmicutes    | Clostridia   | 0                   | 0                    | 0                   | 0                    |
| <b>seq1346</b> | Firmicutes    | Clostridia   | 0                   | 0                    | 0                   | 0                    |
| <b>seq1361</b> | Firmicutes    | Clostridia   | 0                   | 0                    | 0                   | 0                    |
| <b>seq1363</b> | Firmicutes    | Clostridia   | 0                   | 0                    | 0                   | 0                    |
| <b>seq1373</b> | Firmicutes    | Clostridia   | 0                   | 0                    | 0                   | 0                    |
| <b>seq1381</b> | Firmicutes    | Clostridia   | 0                   | 0                    | 0                   | 0                    |
| <b>seq1383</b> | Firmicutes    | Clostridia   | 0                   | 0                    | 0                   | 0                    |
| <b>seq1386</b> | Firmicutes    | Clostridia   | 0                   | 0                    | 0                   | 0                    |
| <b>seq1392</b> | Firmicutes    | Clostridia   | 0                   | 0                    | 0                   | 0                    |
| <b>seq1398</b> | Firmicutes    | Clostridia   | 0                   | 0                    | 0                   | 0                    |
| <b>seq1409</b> | Firmicutes    | Clostridia   | 0                   | 0                    | 0                   | 0                    |
| <b>seq1417</b> | Firmicutes    | Clostridia   | 0                   | 0                    | 0                   | 0                    |
| <b>seq1433</b> | Firmicutes    | Clostridia   | 0                   | 0                    | 0                   | 0                    |
| <b>seq1439</b> | Firmicutes    | Clostridia   | 0                   | 0                    | 0                   | 0                    |
| <b>seq1441</b> | Firmicutes    | Clostridia   | 0                   | 0                    | 0                   | 0                    |
| <b>seq1443</b> | Firmicutes    | Clostridia   | 0                   | 0                    | 0                   | 0                    |
| <b>seq1444</b> | Firmicutes    | Clostridia   | 0                   | 0                    | 0                   | 0                    |

Sequence Count Table

|                | <b>Phylum</b> | <b>Class</b> | <b>Subject25WK0</b> | <b>Subject25WK12</b> | <b>Subject38WK0</b> | <b>Subject38WK12</b> |
|----------------|---------------|--------------|---------------------|----------------------|---------------------|----------------------|
| <b>seq1247</b> | Firmicutes    | Clostridia   | 0                   | 0                    | 0                   | 0                    |
| <b>seq1251</b> | Firmicutes    | Clostridia   | 7                   | 12                   | 0                   | 0                    |
| <b>seq1254</b> | Firmicutes    | Clostridia   | 0                   | 0                    | 0                   | 0                    |
| <b>seq1258</b> | Firmicutes    | Clostridia   | 0                   | 0                    | 0                   | 0                    |
| <b>seq1264</b> | Firmicutes    | Clostridia   | 10                  | 0                    | 0                   | 0                    |
| <b>seq1272</b> | Firmicutes    | Clostridia   | 0                   | 0                    | 0                   | 0                    |
| <b>seq1274</b> | Firmicutes    | Clostridia   | 0                   | 0                    | 0                   | 0                    |
| <b>seq1287</b> | Firmicutes    | Clostridia   | 0                   | 0                    | 0                   | 0                    |
| <b>seq1289</b> | Firmicutes    | Clostridia   | 0                   | 0                    | 0                   | 0                    |
| <b>seq1299</b> | Firmicutes    | Clostridia   | 33                  | 0                    | 0                   | 0                    |
| <b>seq1303</b> | Firmicutes    | Clostridia   | 0                   | 0                    | 0                   | 0                    |
| <b>seq1330</b> | Firmicutes    | Clostridia   | 0                   | 0                    | 0                   | 0                    |
| <b>seq1331</b> | Firmicutes    | Clostridia   | 0                   | 0                    | 0                   | 0                    |
| <b>seq1335</b> | Firmicutes    | Clostridia   | 0                   | 0                    | 0                   | 0                    |
| <b>seq1340</b> | Firmicutes    | Clostridia   | 0                   | 0                    | 0                   | 0                    |
| <b>seq1344</b> | Firmicutes    | Clostridia   | 0                   | 0                    | 0                   | 0                    |
| <b>seq1346</b> | Firmicutes    | Clostridia   | 0                   | 0                    | 0                   | 0                    |
| <b>seq1361</b> | Firmicutes    | Clostridia   | 0                   | 0                    | 0                   | 0                    |
| <b>seq1363</b> | Firmicutes    | Clostridia   | 0                   | 0                    | 0                   | 0                    |
| <b>seq1373</b> | Firmicutes    | Clostridia   | 0                   | 0                    | 0                   | 0                    |
| <b>seq1381</b> | Firmicutes    | Clostridia   | 0                   | 0                    | 0                   | 0                    |
| <b>seq1383</b> | Firmicutes    | Clostridia   | 0                   | 0                    | 0                   | 0                    |
| <b>seq1386</b> | Firmicutes    | Clostridia   | 0                   | 0                    | 0                   | 0                    |
| <b>seq1392</b> | Firmicutes    | Clostridia   | 0                   | 0                    | 0                   | 0                    |
| <b>seq1398</b> | Firmicutes    | Clostridia   | 0                   | 0                    | 0                   | 0                    |
| <b>seq1409</b> | Firmicutes    | Clostridia   | 0                   | 0                    | 0                   | 0                    |
| <b>seq1417</b> | Firmicutes    | Clostridia   | 20                  | 0                    | 0                   | 0                    |
| <b>seq1433</b> | Firmicutes    | Clostridia   | 0                   | 0                    | 0                   | 0                    |
| <b>seq1439</b> | Firmicutes    | Clostridia   | 0                   | 0                    | 0                   | 0                    |
| <b>seq1441</b> | Firmicutes    | Clostridia   | 0                   | 0                    | 0                   | 0                    |
| <b>seq1443</b> | Firmicutes    | Clostridia   | 0                   | 0                    | 0                   | 0                    |
| <b>seq1444</b> | Firmicutes    | Clostridia   | 0                   | 0                    | 0                   | 0                    |

Sequence Count Table

|                | <b>Phylum</b> | <b>Class</b> | <b>Subject31WK0</b> | <b>Subject31WK12</b> | <b>Subject32WK0</b> | <b>Subject32WK12</b> |
|----------------|---------------|--------------|---------------------|----------------------|---------------------|----------------------|
| <b>seq1247</b> | Firmicutes    | Clostridia   | 0                   | 0                    | 0                   | 0                    |
| <b>seq1251</b> | Firmicutes    | Clostridia   | 0                   | 0                    | 0                   | 0                    |
| <b>seq1254</b> | Firmicutes    | Clostridia   | 0                   | 0                    | 0                   | 0                    |
| <b>seq1258</b> | Firmicutes    | Clostridia   | 0                   | 0                    | 0                   | 0                    |
| <b>seq1264</b> | Firmicutes    | Clostridia   | 0                   | 0                    | 0                   | 0                    |
| <b>seq1272</b> | Firmicutes    | Clostridia   | 0                   | 0                    | 0                   | 0                    |
| <b>seq1274</b> | Firmicutes    | Clostridia   | 0                   | 0                    | 0                   | 0                    |
| <b>seq1287</b> | Firmicutes    | Clostridia   | 0                   | 0                    | 0                   | 0                    |
| <b>seq1289</b> | Firmicutes    | Clostridia   | 0                   | 0                    | 0                   | 0                    |
| <b>seq1299</b> | Firmicutes    | Clostridia   | 0                   | 0                    | 0                   | 0                    |
| <b>seq1303</b> | Firmicutes    | Clostridia   | 0                   | 0                    | 0                   | 0                    |
| <b>seq1330</b> | Firmicutes    | Clostridia   | 0                   | 0                    | 0                   | 0                    |
| <b>seq1331</b> | Firmicutes    | Clostridia   | 0                   | 0                    | 0                   | 0                    |
| <b>seq1335</b> | Firmicutes    | Clostridia   | 0                   | 0                    | 0                   | 0                    |
| <b>seq1340</b> | Firmicutes    | Clostridia   | 0                   | 0                    | 0                   | 0                    |
| <b>seq1344</b> | Firmicutes    | Clostridia   | 0                   | 0                    | 0                   | 0                    |
| <b>seq1346</b> | Firmicutes    | Clostridia   | 0                   | 0                    | 0                   | 0                    |
| <b>seq1361</b> | Firmicutes    | Clostridia   | 0                   | 0                    | 0                   | 0                    |
| <b>seq1363</b> | Firmicutes    | Clostridia   | 0                   | 0                    | 0                   | 0                    |
| <b>seq1373</b> | Firmicutes    | Clostridia   | 0                   | 0                    | 0                   | 0                    |
| <b>seq1381</b> | Firmicutes    | Clostridia   | 0                   | 0                    | 0                   | 0                    |
| <b>seq1383</b> | Firmicutes    | Clostridia   | 0                   | 0                    | 0                   | 0                    |
| <b>seq1386</b> | Firmicutes    | Clostridia   | 0                   | 0                    | 0                   | 0                    |
| <b>seq1392</b> | Firmicutes    | Clostridia   | 0                   | 0                    | 0                   | 0                    |
| <b>seq1398</b> | Firmicutes    | Clostridia   | 0                   | 0                    | 0                   | 0                    |
| <b>seq1409</b> | Firmicutes    | Clostridia   | 0                   | 0                    | 0                   | 0                    |
| <b>seq1417</b> | Firmicutes    | Clostridia   | 0                   | 0                    | 0                   | 0                    |
| <b>seq1433</b> | Firmicutes    | Clostridia   | 0                   | 0                    | 0                   | 0                    |
| <b>seq1439</b> | Firmicutes    | Clostridia   | 0                   | 0                    | 0                   | 0                    |
| <b>seq1441</b> | Firmicutes    | Clostridia   | 0                   | 0                    | 0                   | 0                    |
| <b>seq1443</b> | Firmicutes    | Clostridia   | 0                   | 0                    | 0                   | 0                    |
| <b>seq1444</b> | Firmicutes    | Clostridia   | 0                   | 0                    | 0                   | 0                    |

Sequence Count Table

|                | <b>Phylum</b> | <b>Class</b> | <b>Subject13WK0</b> | <b>Subject13WK12</b> | <b>Subject39WK0</b> | <b>Subject39WK12</b> |
|----------------|---------------|--------------|---------------------|----------------------|---------------------|----------------------|
| <b>seq1247</b> | Firmicutes    | Clostridia   | 0                   | 0                    | 0                   | 0                    |
| <b>seq1251</b> | Firmicutes    | Clostridia   | 6                   | 0                    | 0                   | 8                    |
| <b>seq1254</b> | Firmicutes    | Clostridia   | 0                   | 6                    | 0                   | 0                    |
| <b>seq1258</b> | Firmicutes    | Clostridia   | 0                   | 0                    | 0                   | 0                    |
| <b>seq1264</b> | Firmicutes    | Clostridia   | 8                   | 0                    | 0                   | 0                    |
| <b>seq1272</b> | Firmicutes    | Clostridia   | 0                   | 0                    | 0                   | 0                    |
| <b>seq1274</b> | Firmicutes    | Clostridia   | 0                   | 23                   | 0                   | 0                    |
| <b>seq1287</b> | Firmicutes    | Clostridia   | 0                   | 0                    | 0                   | 0                    |
| <b>seq1289</b> | Firmicutes    | Clostridia   | 0                   | 0                    | 0                   | 0                    |
| <b>seq1299</b> | Firmicutes    | Clostridia   | 10                  | 0                    | 0                   | 0                    |
| <b>seq1303</b> | Firmicutes    | Clostridia   | 0                   | 0                    | 0                   | 0                    |
| <b>seq1330</b> | Firmicutes    | Clostridia   | 0                   | 0                    | 0                   | 0                    |
| <b>seq1331</b> | Firmicutes    | Clostridia   | 0                   | 15                   | 0                   | 0                    |
| <b>seq1335</b> | Firmicutes    | Clostridia   | 0                   | 13                   | 0                   | 0                    |
| <b>seq1340</b> | Firmicutes    | Clostridia   | 17                  | 0                    | 0                   | 0                    |
| <b>seq1344</b> | Firmicutes    | Clostridia   | 0                   | 0                    | 0                   | 0                    |
| <b>seq1346</b> | Firmicutes    | Clostridia   | 0                   | 0                    | 0                   | 0                    |
| <b>seq1361</b> | Firmicutes    | Clostridia   | 0                   | 0                    | 0                   | 0                    |
| <b>seq1363</b> | Firmicutes    | Clostridia   | 0                   | 0                    | 0                   | 0                    |
| <b>seq1373</b> | Firmicutes    | Clostridia   | 0                   | 0                    | 0                   | 0                    |
| <b>seq1381</b> | Firmicutes    | Clostridia   | 0                   | 0                    | 0                   | 0                    |
| <b>seq1383</b> | Firmicutes    | Clostridia   | 0                   | 0                    | 0                   | 0                    |
| <b>seq1386</b> | Firmicutes    | Clostridia   | 23                  | 0                    | 0                   | 0                    |
| <b>seq1392</b> | Firmicutes    | Clostridia   | 29                  | 0                    | 0                   | 0                    |
| <b>seq1398</b> | Firmicutes    | Clostridia   | 0                   | 0                    | 0                   | 0                    |
| <b>seq1409</b> | Firmicutes    | Clostridia   | 0                   | 0                    | 0                   | 0                    |
| <b>seq1417</b> | Firmicutes    | Clostridia   | 0                   | 0                    | 0                   | 0                    |
| <b>seq1433</b> | Firmicutes    | Clostridia   | 0                   | 0                    | 0                   | 18                   |
| <b>seq1439</b> | Firmicutes    | Clostridia   | 0                   | 0                    | 0                   | 0                    |
| <b>seq1441</b> | Firmicutes    | Clostridia   | 0                   | 0                    | 0                   | 0                    |
| <b>seq1443</b> | Firmicutes    | Clostridia   | 0                   | 0                    | 0                   | 0                    |
| <b>seq1444</b> | Firmicutes    | Clostridia   | 0                   | 0                    | 0                   | 0                    |

Sequence Count Table

|                | <b>Phylum</b> | <b>Class</b> | <b>Subject26WK0</b> | <b>Subject26WK12</b> | <b>Subject14WK0</b> | <b>Subject14WK12</b> |
|----------------|---------------|--------------|---------------------|----------------------|---------------------|----------------------|
| <b>seq1247</b> | Firmicutes    | Clostridia   | 0                   | 0                    | 0                   | 21                   |
| <b>seq1251</b> | Firmicutes    | Clostridia   | 0                   | 0                    | 0                   | 0                    |
| <b>seq1254</b> | Firmicutes    | Clostridia   | 0                   | 7                    | 0                   | 0                    |
| <b>seq1258</b> | Firmicutes    | Clostridia   | 0                   | 0                    | 0                   | 0                    |
| <b>seq1264</b> | Firmicutes    | Clostridia   | 0                   | 10                   | 9                   | 5                    |
| <b>seq1272</b> | Firmicutes    | Clostridia   | 0                   | 0                    | 0                   | 0                    |
| <b>seq1274</b> | Firmicutes    | Clostridia   | 0                   | 0                    | 0                   | 0                    |
| <b>seq1287</b> | Firmicutes    | Clostridia   | 0                   | 0                    | 0                   | 0                    |
| <b>seq1289</b> | Firmicutes    | Clostridia   | 0                   | 0                    | 0                   | 0                    |
| <b>seq1299</b> | Firmicutes    | Clostridia   | 0                   | 0                    | 0                   | 0                    |
| <b>seq1303</b> | Firmicutes    | Clostridia   | 0                   | 0                    | 0                   | 0                    |
| <b>seq1330</b> | Firmicutes    | Clostridia   | 0                   | 0                    | 0                   | 0                    |
| <b>seq1331</b> | Firmicutes    | Clostridia   | 0                   | 0                    | 0                   | 0                    |
| <b>seq1335</b> | Firmicutes    | Clostridia   | 0                   | 0                    | 16                  | 22                   |
| <b>seq1340</b> | Firmicutes    | Clostridia   | 0                   | 0                    | 0                   | 0                    |
| <b>seq1344</b> | Firmicutes    | Clostridia   | 7                   | 0                    | 0                   | 7                    |
| <b>seq1346</b> | Firmicutes    | Clostridia   | 0                   | 0                    | 0                   | 0                    |
| <b>seq1361</b> | Firmicutes    | Clostridia   | 12                  | 35                   | 0                   | 0                    |
| <b>seq1363</b> | Firmicutes    | Clostridia   | 0                   | 0                    | 0                   | 0                    |
| <b>seq1373</b> | Firmicutes    | Clostridia   | 0                   | 0                    | 0                   | 0                    |
| <b>seq1381</b> | Firmicutes    | Clostridia   | 0                   | 0                    | 0                   | 44                   |
| <b>seq1383</b> | Firmicutes    | Clostridia   | 0                   | 0                    | 0                   | 0                    |
| <b>seq1386</b> | Firmicutes    | Clostridia   | 0                   | 0                    | 0                   | 0                    |
| <b>seq1392</b> | Firmicutes    | Clostridia   | 0                   | 0                    | 0                   | 0                    |
| <b>seq1398</b> | Firmicutes    | Clostridia   | 0                   | 0                    | 0                   | 0                    |
| <b>seq1409</b> | Firmicutes    | Clostridia   | 0                   | 0                    | 0                   | 0                    |
| <b>seq1417</b> | Firmicutes    | Clostridia   | 0                   | 0                    | 0                   | 0                    |
| <b>seq1433</b> | Firmicutes    | Clostridia   | 0                   | 0                    | 0                   | 0                    |
| <b>seq1439</b> | Firmicutes    | Clostridia   | 0                   | 0                    | 0                   | 0                    |
| <b>seq1441</b> | Firmicutes    | Clostridia   | 0                   | 0                    | 0                   | 0                    |
| <b>seq1443</b> | Firmicutes    | Clostridia   | 0                   | 0                    | 0                   | 0                    |
| <b>seq1444</b> | Firmicutes    | Clostridia   | 0                   | 0                    | 0                   | 0                    |

Sequence Count Table

|                | <b>Phylum</b> | <b>Class</b> | <b>Subject27WK0</b> | <b>Subject27WK12</b> | <b>Subject15WK0</b> | <b>Subject15WK12</b> |
|----------------|---------------|--------------|---------------------|----------------------|---------------------|----------------------|
| <b>seq1247</b> | Firmicutes    | Clostridia   | 0                   | 0                    | 0                   | 0                    |
| <b>seq1251</b> | Firmicutes    | Clostridia   | 0                   | 0                    | 0                   | 0                    |
| <b>seq1254</b> | Firmicutes    | Clostridia   | 0                   | 0                    | 0                   | 0                    |
| <b>seq1258</b> | Firmicutes    | Clostridia   | 0                   | 0                    | 0                   | 0                    |
| <b>seq1264</b> | Firmicutes    | Clostridia   | 0                   | 0                    | 0                   | 0                    |
| <b>seq1272</b> | Firmicutes    | Clostridia   | 0                   | 0                    | 0                   | 0                    |
| <b>seq1274</b> | Firmicutes    | Clostridia   | 0                   | 0                    | 0                   | 0                    |
| <b>seq1287</b> | Firmicutes    | Clostridia   | 0                   | 0                    | 0                   | 0                    |
| <b>seq1289</b> | Firmicutes    | Clostridia   | 0                   | 0                    | 0                   | 0                    |
| <b>seq1299</b> | Firmicutes    | Clostridia   | 0                   | 0                    | 0                   | 0                    |
| <b>seq1303</b> | Firmicutes    | Clostridia   | 0                   | 0                    | 0                   | 0                    |
| <b>seq1330</b> | Firmicutes    | Clostridia   | 0                   | 0                    | 0                   | 0                    |
| <b>seq1331</b> | Firmicutes    | Clostridia   | 0                   | 0                    | 0                   | 0                    |
| <b>seq1335</b> | Firmicutes    | Clostridia   | 0                   | 0                    | 0                   | 0                    |
| <b>seq1340</b> | Firmicutes    | Clostridia   | 0                   | 0                    | 0                   | 0                    |
| <b>seq1344</b> | Firmicutes    | Clostridia   | 0                   | 0                    | 0                   | 0                    |
| <b>seq1346</b> | Firmicutes    | Clostridia   | 0                   | 0                    | 0                   | 0                    |
| <b>seq1361</b> | Firmicutes    | Clostridia   | 0                   | 0                    | 0                   | 0                    |
| <b>seq1363</b> | Firmicutes    | Clostridia   | 0                   | 0                    | 0                   | 0                    |
| <b>seq1373</b> | Firmicutes    | Clostridia   | 0                   | 0                    | 0                   | 0                    |
| <b>seq1381</b> | Firmicutes    | Clostridia   | 0                   | 0                    | 0                   | 0                    |
| <b>seq1383</b> | Firmicutes    | Clostridia   | 0                   | 0                    | 0                   | 0                    |
| <b>seq1386</b> | Firmicutes    | Clostridia   | 0                   | 0                    | 0                   | 0                    |
| <b>seq1392</b> | Firmicutes    | Clostridia   | 0                   | 0                    | 0                   | 0                    |
| <b>seq1398</b> | Firmicutes    | Clostridia   | 0                   | 0                    | 0                   | 0                    |
| <b>seq1409</b> | Firmicutes    | Clostridia   | 0                   | 0                    | 0                   | 0                    |
| <b>seq1417</b> | Firmicutes    | Clostridia   | 0                   | 0                    | 0                   | 0                    |
| <b>seq1433</b> | Firmicutes    | Clostridia   | 0                   | 0                    | 0                   | 0                    |
| <b>seq1439</b> | Firmicutes    | Clostridia   | 0                   | 0                    | 0                   | 0                    |
| <b>seq1441</b> | Firmicutes    | Clostridia   | 0                   | 0                    | 0                   | 0                    |
| <b>seq1443</b> | Firmicutes    | Clostridia   | 0                   | 0                    | 0                   | 0                    |
| <b>seq1444</b> | Firmicutes    | Clostridia   | 0                   | 0                    | 0                   | 0                    |

Sequence Count Table

|                | <b>Phylum</b> | <b>Class</b> | <b>Δ</b> |  |  |  |
|----------------|---------------|--------------|----------|--|--|--|
| <b>seq1247</b> | Firmicutes    | Clostridia   |          |  |  |  |
| <b>seq1251</b> | Firmicutes    | Clostridia   |          |  |  |  |
| <b>seq1254</b> | Firmicutes    | Clostridia   |          |  |  |  |
| <b>seq1258</b> | Firmicutes    | Clostridia   |          |  |  |  |
| <b>seq1264</b> | Firmicutes    | Clostridia   |          |  |  |  |
| <b>seq1272</b> | Firmicutes    | Clostridia   |          |  |  |  |
| <b>seq1274</b> | Firmicutes    | Clostridia   |          |  |  |  |
| <b>seq1287</b> | Firmicutes    | Clostridia   |          |  |  |  |
| <b>seq1289</b> | Firmicutes    | Clostridia   |          |  |  |  |
| <b>seq1299</b> | Firmicutes    | Clostridia   |          |  |  |  |
| <b>seq1303</b> | Firmicutes    | Clostridia   |          |  |  |  |
| <b>seq1330</b> | Firmicutes    | Clostridia   |          |  |  |  |
| <b>seq1331</b> | Firmicutes    | Clostridia   |          |  |  |  |
| <b>seq1335</b> | Firmicutes    | Clostridia   |          |  |  |  |
| <b>seq1340</b> | Firmicutes    | Clostridia   |          |  |  |  |
| <b>seq1344</b> | Firmicutes    | Clostridia   |          |  |  |  |
| <b>seq1346</b> | Firmicutes    | Clostridia   |          |  |  |  |
| <b>seq1361</b> | Firmicutes    | Clostridia   |          |  |  |  |
| <b>seq1363</b> | Firmicutes    | Clostridia   |          |  |  |  |
| <b>seq1373</b> | Firmicutes    | Clostridia   |          |  |  |  |
| <b>seq1381</b> | Firmicutes    | Clostridia   |          |  |  |  |
| <b>seq1383</b> | Firmicutes    | Clostridia   |          |  |  |  |
| <b>seq1386</b> | Firmicutes    | Clostridia   |          |  |  |  |
| <b>seq1392</b> | Firmicutes    | Clostridia   |          |  |  |  |
| <b>seq1398</b> | Firmicutes    | Clostridia   |          |  |  |  |
| <b>seq1409</b> | Firmicutes    | Clostridia   |          |  |  |  |
| <b>seq1417</b> | Firmicutes    | Clostridia   |          |  |  |  |
| <b>seq1433</b> | Firmicutes    | Clostridia   |          |  |  |  |
| <b>seq1439</b> | Firmicutes    | Clostridia   |          |  |  |  |
| <b>seq1441</b> | Firmicutes    | Clostridia   |          |  |  |  |
| <b>seq1443</b> | Firmicutes    | Clostridia   |          |  |  |  |
| <b>seq1444</b> | Firmicutes    | Clostridia   |          |  |  |  |

Sequence Count Table

|                | <b>Phylum</b> | <b>Class</b> | <b>Order</b>  | <b>Family</b>   |
|----------------|---------------|--------------|---------------|-----------------|
| <b>seq1472</b> | Firmicutes    | Clostridia   | Clostridiales | Ruminococcaceae |
| <b>seq1481</b> | Firmicutes    | Clostridia   | Clostridiales | Ruminococcaceae |
| <b>seq1482</b> | Firmicutes    | Clostridia   | Clostridiales | Ruminococcaceae |
| <b>seq1483</b> | Firmicutes    | Clostridia   | Clostridiales | Ruminococcaceae |
| <b>seq1484</b> | Firmicutes    | Clostridia   | Clostridiales | Ruminococcaceae |
| <b>seq1497</b> | Firmicutes    | Clostridia   | Clostridiales | Ruminococcaceae |
| <b>seq1500</b> | Firmicutes    | Clostridia   | Clostridiales | Ruminococcaceae |
| <b>seq1516</b> | Firmicutes    | Clostridia   | Clostridiales | Ruminococcaceae |
| <b>seq1522</b> | Firmicutes    | Clostridia   | Clostridiales | Ruminococcaceae |
| <b>seq1525</b> | Firmicutes    | Clostridia   | Clostridiales | Ruminococcaceae |
| <b>seq1527</b> | Firmicutes    | Clostridia   | Clostridiales | Ruminococcaceae |
| <b>seq1532</b> | Firmicutes    | Clostridia   | Clostridiales | Ruminococcaceae |
| <b>seq1533</b> | Firmicutes    | Clostridia   | Clostridiales | Ruminococcaceae |
| <b>seq1538</b> | Firmicutes    | Clostridia   | Clostridiales | Ruminococcaceae |
| <b>seq1539</b> | Firmicutes    | Clostridia   | Clostridiales | Ruminococcaceae |
| <b>seq1543</b> | Firmicutes    | Clostridia   | Clostridiales | Ruminococcaceae |
| <b>seq1546</b> | Firmicutes    | Clostridia   | Clostridiales | Ruminococcaceae |
| <b>seq1570</b> | Firmicutes    | Clostridia   | Clostridiales | Ruminococcaceae |
| <b>seq1579</b> | Firmicutes    | Clostridia   | Clostridiales | Ruminococcaceae |
| <b>seq1585</b> | Firmicutes    | Clostridia   | Clostridiales | Ruminococcaceae |
| <b>seq1587</b> | Firmicutes    | Clostridia   | Clostridiales | Ruminococcaceae |
| <b>seq1590</b> | Firmicutes    | Clostridia   | Clostridiales | Ruminococcaceae |
| <b>seq1600</b> | Firmicutes    | Clostridia   | Clostridiales | Ruminococcaceae |
| <b>seq1604</b> | Firmicutes    | Clostridia   | Clostridiales | Ruminococcaceae |
| <b>seq1607</b> | Firmicutes    | Clostridia   | Clostridiales | Ruminococcaceae |
| <b>seq1611</b> | Firmicutes    | Clostridia   | Clostridiales | Ruminococcaceae |
| <b>seq1615</b> | Firmicutes    | Clostridia   | Clostridiales | Ruminococcaceae |
| <b>seq1622</b> | Firmicutes    | Clostridia   | Clostridiales | Ruminococcaceae |
| <b>seq1623</b> | Firmicutes    | Clostridia   | Clostridiales | Ruminococcaceae |
| <b>seq1625</b> | Firmicutes    | Clostridia   | Clostridiales | Ruminococcaceae |
| <b>seq1630</b> | Firmicutes    | Clostridia   | Clostridiales | Ruminococcaceae |
| <b>seq1632</b> | Firmicutes    | Clostridia   | Clostridiales | Ruminococcaceae |



Sequence Count Table

|                | <b>Phylum</b> | <b>Class</b> | <b>Genus</b> | <b>Species</b> |
|----------------|---------------|--------------|--------------|----------------|
| <b>seq1472</b> | Firmicutes    | Clostridia   |              |                |
| <b>seq1481</b> | Firmicutes    | Clostridia   |              |                |
| <b>seq1482</b> | Firmicutes    | Clostridia   |              |                |
| <b>seq1483</b> | Firmicutes    | Clostridia   |              |                |
| <b>seq1484</b> | Firmicutes    | Clostridia   |              |                |
| <b>seq1497</b> | Firmicutes    | Clostridia   |              |                |
| <b>seq1500</b> | Firmicutes    | Clostridia   |              |                |
| <b>seq1516</b> | Firmicutes    | Clostridia   |              |                |
| <b>seq1522</b> | Firmicutes    | Clostridia   |              |                |
| <b>seq1525</b> | Firmicutes    | Clostridia   |              |                |
| <b>seq1527</b> | Firmicutes    | Clostridia   |              |                |
| <b>seq1532</b> | Firmicutes    | Clostridia   |              |                |
| <b>seq1533</b> | Firmicutes    | Clostridia   |              |                |
| <b>seq1538</b> | Firmicutes    | Clostridia   |              |                |
| <b>seq1539</b> | Firmicutes    | Clostridia   |              |                |
| <b>seq1543</b> | Firmicutes    | Clostridia   |              |                |
| <b>seq1546</b> | Firmicutes    | Clostridia   |              |                |
| <b>seq1570</b> | Firmicutes    | Clostridia   |              |                |
| <b>seq1579</b> | Firmicutes    | Clostridia   |              |                |
| <b>seq1585</b> | Firmicutes    | Clostridia   |              |                |
| <b>seq1587</b> | Firmicutes    | Clostridia   |              |                |
| <b>seq1590</b> | Firmicutes    | Clostridia   |              |                |
| <b>seq1600</b> | Firmicutes    | Clostridia   |              |                |
| <b>seq1604</b> | Firmicutes    | Clostridia   |              |                |
| <b>seq1607</b> | Firmicutes    | Clostridia   |              |                |
| <b>seq1611</b> | Firmicutes    | Clostridia   |              |                |
| <b>seq1615</b> | Firmicutes    | Clostridia   |              |                |
| <b>seq1622</b> | Firmicutes    | Clostridia   |              |                |
| <b>seq1623</b> | Firmicutes    | Clostridia   |              |                |
| <b>seq1625</b> | Firmicutes    | Clostridia   |              |                |
| <b>seq1630</b> | Firmicutes    | Clostridia   |              |                |
| <b>seq1632</b> | Firmicutes    | Clostridia   |              |                |

Sequence Count Table

|                | <b>Phylum</b> | <b>Class</b> | <b>Subject34WK0</b> | <b>Subject34WK12</b> | <b>Subject16WK0</b> | <b>Subject16WK12</b> |
|----------------|---------------|--------------|---------------------|----------------------|---------------------|----------------------|
| <b>seq1472</b> | Firmicutes    | Clostridia   | 0                   | 0                    | 0                   | 0                    |
| <b>seq1481</b> | Firmicutes    | Clostridia   | 0                   | 0                    | 0                   | 0                    |
| <b>seq1482</b> | Firmicutes    | Clostridia   | 0                   | 0                    | 0                   | 0                    |
| <b>seq1483</b> | Firmicutes    | Clostridia   | 0                   | 0                    | 0                   | 0                    |
| <b>seq1484</b> | Firmicutes    | Clostridia   | 0                   | 0                    | 0                   | 0                    |
| <b>seq1497</b> | Firmicutes    | Clostridia   | 0                   | 0                    | 0                   | 0                    |
| <b>seq1500</b> | Firmicutes    | Clostridia   | 0                   | 0                    | 0                   | 0                    |
| <b>seq1516</b> | Firmicutes    | Clostridia   | 0                   | 0                    | 0                   | 0                    |
| <b>seq1522</b> | Firmicutes    | Clostridia   | 0                   | 0                    | 0                   | 0                    |
| <b>seq1525</b> | Firmicutes    | Clostridia   | 0                   | 0                    | 0                   | 0                    |
| <b>seq1527</b> | Firmicutes    | Clostridia   | 0                   | 0                    | 0                   | 0                    |
| <b>seq1532</b> | Firmicutes    | Clostridia   | 0                   | 0                    | 0                   | 0                    |
| <b>seq1533</b> | Firmicutes    | Clostridia   | 0                   | 0                    | 0                   | 0                    |
| <b>seq1538</b> | Firmicutes    | Clostridia   | 0                   | 0                    | 0                   | 0                    |
| <b>seq1539</b> | Firmicutes    | Clostridia   | 0                   | 0                    | 0                   | 0                    |
| <b>seq1543</b> | Firmicutes    | Clostridia   | 0                   | 0                    | 0                   | 0                    |
| <b>seq1546</b> | Firmicutes    | Clostridia   | 0                   | 0                    | 0                   | 0                    |
| <b>seq1570</b> | Firmicutes    | Clostridia   | 0                   | 0                    | 0                   | 0                    |
| <b>seq1579</b> | Firmicutes    | Clostridia   | 0                   | 0                    | 0                   | 0                    |
| <b>seq1585</b> | Firmicutes    | Clostridia   | 0                   | 0                    | 0                   | 0                    |
| <b>seq1587</b> | Firmicutes    | Clostridia   | 0                   | 0                    | 0                   | 0                    |
| <b>seq1590</b> | Firmicutes    | Clostridia   | 0                   | 0                    | 0                   | 0                    |
| <b>seq1600</b> | Firmicutes    | Clostridia   | 0                   | 0                    | 0                   | 0                    |
| <b>seq1604</b> | Firmicutes    | Clostridia   | 0                   | 0                    | 0                   | 0                    |
| <b>seq1607</b> | Firmicutes    | Clostridia   | 0                   | 0                    | 0                   | 0                    |
| <b>seq1611</b> | Firmicutes    | Clostridia   | 0                   | 0                    | 0                   | 0                    |
| <b>seq1615</b> | Firmicutes    | Clostridia   | 0                   | 0                    | 0                   | 0                    |
| <b>seq1622</b> | Firmicutes    | Clostridia   | 0                   | 0                    | 0                   | 0                    |
| <b>seq1623</b> | Firmicutes    | Clostridia   | 0                   | 0                    | 0                   | 0                    |
| <b>seq1625</b> | Firmicutes    | Clostridia   | 0                   | 0                    | 0                   | 0                    |
| <b>seq1630</b> | Firmicutes    | Clostridia   | 0                   | 0                    | 0                   | 0                    |
| <b>seq1632</b> | Firmicutes    | Clostridia   | 0                   | 0                    | 0                   | 0                    |

Sequence Count Table

|                | <b>Phylum</b> | <b>Class</b> | <b>Subject17WK0</b> | <b>Subject17WK12</b> | <b>Subject1WK0</b> | <b>Subject1WK12</b> |
|----------------|---------------|--------------|---------------------|----------------------|--------------------|---------------------|
| <b>seq1472</b> | Firmicutes    | Clostridia   | 0                   | 0                    | 0                  | 0                   |
| <b>seq1481</b> | Firmicutes    | Clostridia   | 0                   | 0                    | 19                 | 0                   |
| <b>seq1482</b> | Firmicutes    | Clostridia   | 0                   | 0                    | 0                  | 8                   |
| <b>seq1483</b> | Firmicutes    | Clostridia   | 0                   | 0                    | 0                  | 0                   |
| <b>seq1484</b> | Firmicutes    | Clostridia   | 0                   | 0                    | 0                  | 0                   |
| <b>seq1497</b> | Firmicutes    | Clostridia   | 0                   | 0                    | 0                  | 6                   |
| <b>seq1500</b> | Firmicutes    | Clostridia   | 0                   | 0                    | 0                  | 0                   |
| <b>seq1516</b> | Firmicutes    | Clostridia   | 0                   | 0                    | 0                  | 0                   |
| <b>seq1522</b> | Firmicutes    | Clostridia   | 0                   | 0                    | 0                  | 0                   |
| <b>seq1525</b> | Firmicutes    | Clostridia   | 0                   | 0                    | 0                  | 0                   |
| <b>seq1527</b> | Firmicutes    | Clostridia   | 0                   | 0                    | 0                  | 0                   |
| <b>seq1532</b> | Firmicutes    | Clostridia   | 0                   | 0                    | 13                 | 10                  |
| <b>seq1533</b> | Firmicutes    | Clostridia   | 0                   | 0                    | 0                  | 0                   |
| <b>seq1538</b> | Firmicutes    | Clostridia   | 0                   | 0                    | 0                  | 0                   |
| <b>seq1539</b> | Firmicutes    | Clostridia   | 0                   | 0                    | 0                  | 0                   |
| <b>seq1543</b> | Firmicutes    | Clostridia   | 0                   | 0                    | 0                  | 0                   |
| <b>seq1546</b> | Firmicutes    | Clostridia   | 0                   | 0                    | 0                  | 0                   |
| <b>seq1570</b> | Firmicutes    | Clostridia   | 0                   | 0                    | 0                  | 0                   |
| <b>seq1579</b> | Firmicutes    | Clostridia   | 0                   | 0                    | 0                  | 0                   |
| <b>seq1585</b> | Firmicutes    | Clostridia   | 0                   | 0                    | 0                  | 0                   |
| <b>seq1587</b> | Firmicutes    | Clostridia   | 0                   | 0                    | 0                  | 0                   |
| <b>seq1590</b> | Firmicutes    | Clostridia   | 0                   | 0                    | 0                  | 0                   |
| <b>seq1600</b> | Firmicutes    | Clostridia   | 0                   | 0                    | 0                  | 0                   |
| <b>seq1604</b> | Firmicutes    | Clostridia   | 0                   | 0                    | 0                  | 0                   |
| <b>seq1607</b> | Firmicutes    | Clostridia   | 0                   | 0                    | 0                  | 0                   |
| <b>seq1611</b> | Firmicutes    | Clostridia   | 0                   | 0                    | 0                  | 0                   |
| <b>seq1615</b> | Firmicutes    | Clostridia   | 0                   | 0                    | 0                  | 9                   |
| <b>seq1622</b> | Firmicutes    | Clostridia   | 0                   | 0                    | 0                  | 0                   |
| <b>seq1623</b> | Firmicutes    | Clostridia   | 0                   | 0                    | 0                  | 0                   |
| <b>seq1625</b> | Firmicutes    | Clostridia   | 0                   | 0                    | 0                  | 0                   |
| <b>seq1630</b> | Firmicutes    | Clostridia   | 0                   | 0                    | 0                  | 0                   |
| <b>seq1632</b> | Firmicutes    | Clostridia   | 0                   | 0                    | 0                  | 0                   |

Sequence Count Table

|                | <b>Phylum</b> | <b>Class</b> | <b>Subject2WK0</b> | <b>Subject2WK12</b> | <b>Subject3WK0</b> | <b>Subject3WK12</b> |
|----------------|---------------|--------------|--------------------|---------------------|--------------------|---------------------|
| <b>seq1472</b> | Firmicutes    | Clostridia   | 0                  | 0                   | 0                  | 0                   |
| <b>seq1481</b> | Firmicutes    | Clostridia   | 0                  | 0                   | 0                  | 0                   |
| <b>seq1482</b> | Firmicutes    | Clostridia   | 0                  | 0                   | 0                  | 0                   |
| <b>seq1483</b> | Firmicutes    | Clostridia   | 0                  | 0                   | 0                  | 0                   |
| <b>seq1484</b> | Firmicutes    | Clostridia   | 0                  | 0                   | 0                  | 0                   |
| <b>seq1497</b> | Firmicutes    | Clostridia   | 0                  | 0                   | 0                  | 0                   |
| <b>seq1500</b> | Firmicutes    | Clostridia   | 0                  | 0                   | 0                  | 0                   |
| <b>seq1516</b> | Firmicutes    | Clostridia   | 0                  | 0                   | 0                  | 0                   |
| <b>seq1522</b> | Firmicutes    | Clostridia   | 0                  | 0                   | 0                  | 0                   |
| <b>seq1525</b> | Firmicutes    | Clostridia   | 0                  | 0                   | 0                  | 0                   |
| <b>seq1527</b> | Firmicutes    | Clostridia   | 0                  | 0                   | 0                  | 0                   |
| <b>seq1532</b> | Firmicutes    | Clostridia   | 0                  | 0                   | 0                  | 0                   |
| <b>seq1533</b> | Firmicutes    | Clostridia   | 6                  | 0                   | 0                  | 0                   |
| <b>seq1538</b> | Firmicutes    | Clostridia   | 0                  | 0                   | 0                  | 0                   |
| <b>seq1539</b> | Firmicutes    | Clostridia   | 0                  | 0                   | 0                  | 0                   |
| <b>seq1543</b> | Firmicutes    | Clostridia   | 0                  | 0                   | 0                  | 0                   |
| <b>seq1546</b> | Firmicutes    | Clostridia   | 0                  | 0                   | 0                  | 0                   |
| <b>seq1570</b> | Firmicutes    | Clostridia   | 0                  | 0                   | 0                  | 0                   |
| <b>seq1579</b> | Firmicutes    | Clostridia   | 0                  | 0                   | 0                  | 0                   |
| <b>seq1585</b> | Firmicutes    | Clostridia   | 0                  | 0                   | 0                  | 0                   |
| <b>seq1587</b> | Firmicutes    | Clostridia   | 0                  | 0                   | 0                  | 0                   |
| <b>seq1590</b> | Firmicutes    | Clostridia   | 0                  | 0                   | 0                  | 0                   |
| <b>seq1600</b> | Firmicutes    | Clostridia   | 0                  | 0                   | 0                  | 0                   |
| <b>seq1604</b> | Firmicutes    | Clostridia   | 0                  | 0                   | 0                  | 0                   |
| <b>seq1607</b> | Firmicutes    | Clostridia   | 0                  | 0                   | 0                  | 0                   |
| <b>seq1611</b> | Firmicutes    | Clostridia   | 0                  | 0                   | 0                  | 0                   |
| <b>seq1615</b> | Firmicutes    | Clostridia   | 0                  | 0                   | 0                  | 0                   |
| <b>seq1622</b> | Firmicutes    | Clostridia   | 0                  | 0                   | 0                  | 0                   |
| <b>seq1623</b> | Firmicutes    | Clostridia   | 0                  | 0                   | 0                  | 0                   |
| <b>seq1625</b> | Firmicutes    | Clostridia   | 0                  | 0                   | 0                  | 0                   |
| <b>seq1630</b> | Firmicutes    | Clostridia   | 0                  | 0                   | 0                  | 0                   |
| <b>seq1632</b> | Firmicutes    | Clostridia   | 0                  | 0                   | 0                  | 0                   |

Sequence Count Table

|                | <b>Phylum</b> | <b>Class</b> | <b>Subject4WK0</b> | <b>Subject4WK12</b> | <b>Subject5WK0</b> | <b>Subject5WK12</b> |
|----------------|---------------|--------------|--------------------|---------------------|--------------------|---------------------|
| <b>seq1472</b> | Firmicutes    | Clostridia   | 0                  | 0                   | 0                  | 0                   |
| <b>seq1481</b> | Firmicutes    | Clostridia   | 0                  | 0                   | 0                  | 0                   |
| <b>seq1482</b> | Firmicutes    | Clostridia   | 0                  | 0                   | 0                  | 7                   |
| <b>seq1483</b> | Firmicutes    | Clostridia   | 30                 | 0                   | 0                  | 0                   |
| <b>seq1484</b> | Firmicutes    | Clostridia   | 23                 | 0                   | 0                  | 0                   |
| <b>seq1497</b> | Firmicutes    | Clostridia   | 0                  | 0                   | 0                  | 0                   |
| <b>seq1500</b> | Firmicutes    | Clostridia   | 0                  | 0                   | 0                  | 0                   |
| <b>seq1516</b> | Firmicutes    | Clostridia   | 0                  | 0                   | 0                  | 0                   |
| <b>seq1522</b> | Firmicutes    | Clostridia   | 0                  | 11                  | 0                  | 0                   |
| <b>seq1525</b> | Firmicutes    | Clostridia   | 0                  | 0                   | 0                  | 0                   |
| <b>seq1527</b> | Firmicutes    | Clostridia   | 0                  | 0                   | 0                  | 0                   |
| <b>seq1532</b> | Firmicutes    | Clostridia   | 0                  | 0                   | 0                  | 0                   |
| <b>seq1533</b> | Firmicutes    | Clostridia   | 0                  | 0                   | 0                  | 0                   |
| <b>seq1538</b> | Firmicutes    | Clostridia   | 0                  | 0                   | 0                  | 0                   |
| <b>seq1539</b> | Firmicutes    | Clostridia   | 0                  | 0                   | 0                  | 0                   |
| <b>seq1543</b> | Firmicutes    | Clostridia   | 6                  | 8                   | 0                  | 0                   |
| <b>seq1546</b> | Firmicutes    | Clostridia   | 0                  | 0                   | 0                  | 0                   |
| <b>seq1570</b> | Firmicutes    | Clostridia   | 0                  | 0                   | 0                  | 0                   |
| <b>seq1579</b> | Firmicutes    | Clostridia   | 0                  | 0                   | 0                  | 0                   |
| <b>seq1585</b> | Firmicutes    | Clostridia   | 0                  | 0                   | 0                  | 0                   |
| <b>seq1587</b> | Firmicutes    | Clostridia   | 0                  | 0                   | 0                  | 0                   |
| <b>seq1590</b> | Firmicutes    | Clostridia   | 0                  | 20                  | 0                  | 0                   |
| <b>seq1600</b> | Firmicutes    | Clostridia   | 0                  | 0                   | 0                  | 0                   |
| <b>seq1604</b> | Firmicutes    | Clostridia   | 0                  | 0                   | 0                  | 0                   |
| <b>seq1607</b> | Firmicutes    | Clostridia   | 0                  | 0                   | 0                  | 0                   |
| <b>seq1611</b> | Firmicutes    | Clostridia   | 0                  | 0                   | 0                  | 0                   |
| <b>seq1615</b> | Firmicutes    | Clostridia   | 0                  | 0                   | 0                  | 0                   |
| <b>seq1622</b> | Firmicutes    | Clostridia   | 0                  | 0                   | 0                  | 0                   |
| <b>seq1623</b> | Firmicutes    | Clostridia   | 0                  | 0                   | 0                  | 0                   |
| <b>seq1625</b> | Firmicutes    | Clostridia   | 0                  | 0                   | 0                  | 0                   |
| <b>seq1630</b> | Firmicutes    | Clostridia   | 0                  | 14                  | 0                  | 0                   |
| <b>seq1632</b> | Firmicutes    | Clostridia   | 0                  | 0                   | 0                  | 0                   |

Sequence Count Table

|                | <b>Phylum</b> | <b>Class</b> | <b>Subject6WK0</b> | <b>Subject6WK12</b> | <b>Subject18WK0</b> | <b>Subject18WK12</b> |
|----------------|---------------|--------------|--------------------|---------------------|---------------------|----------------------|
| <b>seq1472</b> | Firmicutes    | Clostridia   | 0                  | 0                   | 0                   | 0                    |
| <b>seq1481</b> | Firmicutes    | Clostridia   | 11                 | 0                   | 0                   | 0                    |
| <b>seq1482</b> | Firmicutes    | Clostridia   | 0                  | 0                   | 6                   | 0                    |
| <b>seq1483</b> | Firmicutes    | Clostridia   | 0                  | 0                   | 0                   | 0                    |
| <b>seq1484</b> | Firmicutes    | Clostridia   | 0                  | 0                   | 0                   | 0                    |
| <b>seq1497</b> | Firmicutes    | Clostridia   | 0                  | 0                   | 0                   | 0                    |
| <b>seq1500</b> | Firmicutes    | Clostridia   | 0                  | 0                   | 0                   | 0                    |
| <b>seq1516</b> | Firmicutes    | Clostridia   | 0                  | 0                   | 0                   | 0                    |
| <b>seq1522</b> | Firmicutes    | Clostridia   | 0                  | 0                   | 0                   | 0                    |
| <b>seq1525</b> | Firmicutes    | Clostridia   | 12                 | 14                  | 0                   | 0                    |
| <b>seq1527</b> | Firmicutes    | Clostridia   | 0                  | 0                   | 0                   | 0                    |
| <b>seq1532</b> | Firmicutes    | Clostridia   | 0                  | 0                   | 0                   | 0                    |
| <b>seq1533</b> | Firmicutes    | Clostridia   | 0                  | 0                   | 0                   | 0                    |
| <b>seq1538</b> | Firmicutes    | Clostridia   | 0                  | 0                   | 0                   | 0                    |
| <b>seq1539</b> | Firmicutes    | Clostridia   | 0                  | 0                   | 0                   | 0                    |
| <b>seq1543</b> | Firmicutes    | Clostridia   | 0                  | 0                   | 0                   | 0                    |
| <b>seq1546</b> | Firmicutes    | Clostridia   | 0                  | 0                   | 0                   | 0                    |
| <b>seq1570</b> | Firmicutes    | Clostridia   | 0                  | 0                   | 0                   | 0                    |
| <b>seq1579</b> | Firmicutes    | Clostridia   | 0                  | 21                  | 0                   | 0                    |
| <b>seq1585</b> | Firmicutes    | Clostridia   | 0                  | 0                   | 0                   | 0                    |
| <b>seq1587</b> | Firmicutes    | Clostridia   | 0                  | 0                   | 0                   | 0                    |
| <b>seq1590</b> | Firmicutes    | Clostridia   | 0                  | 0                   | 0                   | 0                    |
| <b>seq1600</b> | Firmicutes    | Clostridia   | 0                  | 0                   | 0                   | 0                    |
| <b>seq1604</b> | Firmicutes    | Clostridia   | 8                  | 11                  | 0                   | 0                    |
| <b>seq1607</b> | Firmicutes    | Clostridia   | 0                  | 0                   | 0                   | 0                    |
| <b>seq1611</b> | Firmicutes    | Clostridia   | 0                  | 0                   | 0                   | 0                    |
| <b>seq1615</b> | Firmicutes    | Clostridia   | 0                  | 0                   | 0                   | 0                    |
| <b>seq1622</b> | Firmicutes    | Clostridia   | 0                  | 0                   | 0                   | 0                    |
| <b>seq1623</b> | Firmicutes    | Clostridia   | 0                  | 0                   | 0                   | 0                    |
| <b>seq1625</b> | Firmicutes    | Clostridia   | 0                  | 0                   | 0                   | 0                    |
| <b>seq1630</b> | Firmicutes    | Clostridia   | 0                  | 0                   | 0                   | 0                    |
| <b>seq1632</b> | Firmicutes    | Clostridia   | 0                  | 4                   | 0                   | 0                    |

Sequence Count Table

|                | <b>Phylum</b> | <b>Class</b> | <b>Subject19WK0</b> | <b>Subject19WK12</b> | <b>Subject20WK0</b> | <b>Subject20WK12</b> |
|----------------|---------------|--------------|---------------------|----------------------|---------------------|----------------------|
| <b>seq1472</b> | Firmicutes    | Clostridia   | 0                   | 0                    | 0                   | 0                    |
| <b>seq1481</b> | Firmicutes    | Clostridia   | 0                   | 0                    | 0                   | 0                    |
| <b>seq1482</b> | Firmicutes    | Clostridia   | 0                   | 0                    | 0                   | 0                    |
| <b>seq1483</b> | Firmicutes    | Clostridia   | 0                   | 0                    | 0                   | 0                    |
| <b>seq1484</b> | Firmicutes    | Clostridia   | 0                   | 0                    | 0                   | 0                    |
| <b>seq1497</b> | Firmicutes    | Clostridia   | 0                   | 0                    | 0                   | 0                    |
| <b>seq1500</b> | Firmicutes    | Clostridia   | 0                   | 0                    | 6                   | 0                    |
| <b>seq1516</b> | Firmicutes    | Clostridia   | 0                   | 0                    | 0                   | 0                    |
| <b>seq1522</b> | Firmicutes    | Clostridia   | 0                   | 0                    | 0                   | 0                    |
| <b>seq1525</b> | Firmicutes    | Clostridia   | 0                   | 0                    | 0                   | 0                    |
| <b>seq1527</b> | Firmicutes    | Clostridia   | 0                   | 0                    | 0                   | 0                    |
| <b>seq1532</b> | Firmicutes    | Clostridia   | 0                   | 0                    | 0                   | 0                    |
| <b>seq1533</b> | Firmicutes    | Clostridia   | 0                   | 0                    | 0                   | 0                    |
| <b>seq1538</b> | Firmicutes    | Clostridia   | 0                   | 0                    | 0                   | 0                    |
| <b>seq1539</b> | Firmicutes    | Clostridia   | 0                   | 0                    | 0                   | 0                    |
| <b>seq1543</b> | Firmicutes    | Clostridia   | 0                   | 0                    | 0                   | 0                    |
| <b>seq1546</b> | Firmicutes    | Clostridia   | 0                   | 24                   | 0                   | 0                    |
| <b>seq1570</b> | Firmicutes    | Clostridia   | 0                   | 0                    | 0                   | 0                    |
| <b>seq1579</b> | Firmicutes    | Clostridia   | 0                   | 0                    | 0                   | 0                    |
| <b>seq1585</b> | Firmicutes    | Clostridia   | 0                   | 0                    | 0                   | 0                    |
| <b>seq1587</b> | Firmicutes    | Clostridia   | 0                   | 0                    | 0                   | 0                    |
| <b>seq1590</b> | Firmicutes    | Clostridia   | 0                   | 0                    | 0                   | 0                    |
| <b>seq1600</b> | Firmicutes    | Clostridia   | 0                   | 0                    | 0                   | 0                    |
| <b>seq1604</b> | Firmicutes    | Clostridia   | 0                   | 0                    | 0                   | 0                    |
| <b>seq1607</b> | Firmicutes    | Clostridia   | 0                   | 0                    | 0                   | 0                    |
| <b>seq1611</b> | Firmicutes    | Clostridia   | 0                   | 0                    | 0                   | 0                    |
| <b>seq1615</b> | Firmicutes    | Clostridia   | 0                   | 0                    | 0                   | 0                    |
| <b>seq1622</b> | Firmicutes    | Clostridia   | 0                   | 0                    | 0                   | 0                    |
| <b>seq1623</b> | Firmicutes    | Clostridia   | 0                   | 0                    | 0                   | 0                    |
| <b>seq1625</b> | Firmicutes    | Clostridia   | 0                   | 0                    | 0                   | 0                    |
| <b>seq1630</b> | Firmicutes    | Clostridia   | 0                   | 0                    | 0                   | 0                    |
| <b>seq1632</b> | Firmicutes    | Clostridia   | 0                   | 0                    | 0                   | 0                    |

Sequence Count Table

|                | <b>Phylum</b> | <b>Class</b> | <b>Subject7WK0</b> | <b>Subject7WK12</b> | <b>Subject21WK0</b> | <b>Subject21WK12</b> |
|----------------|---------------|--------------|--------------------|---------------------|---------------------|----------------------|
| <b>seq1472</b> | Firmicutes    | Clostridia   | 0                  | 0                   | 0                   | 0                    |
| <b>seq1481</b> | Firmicutes    | Clostridia   | 0                  | 0                   | 0                   | 0                    |
| <b>seq1482</b> | Firmicutes    | Clostridia   | 0                  | 0                   | 0                   | 0                    |
| <b>seq1483</b> | Firmicutes    | Clostridia   | 0                  | 0                   | 0                   | 0                    |
| <b>seq1484</b> | Firmicutes    | Clostridia   | 0                  | 0                   | 0                   | 0                    |
| <b>seq1497</b> | Firmicutes    | Clostridia   | 14                 | 0                   | 0                   | 0                    |
| <b>seq1500</b> | Firmicutes    | Clostridia   | 0                  | 0                   | 0                   | 0                    |
| <b>seq1516</b> | Firmicutes    | Clostridia   | 0                  | 0                   | 0                   | 0                    |
| <b>seq1522</b> | Firmicutes    | Clostridia   | 0                  | 0                   | 0                   | 0                    |
| <b>seq1525</b> | Firmicutes    | Clostridia   | 0                  | 0                   | 0                   | 0                    |
| <b>seq1527</b> | Firmicutes    | Clostridia   | 16                 | 10                  | 0                   | 0                    |
| <b>seq1532</b> | Firmicutes    | Clostridia   | 0                  | 0                   | 0                   | 0                    |
| <b>seq1533</b> | Firmicutes    | Clostridia   | 0                  | 0                   | 0                   | 0                    |
| <b>seq1538</b> | Firmicutes    | Clostridia   | 0                  | 0                   | 0                   | 0                    |
| <b>seq1539</b> | Firmicutes    | Clostridia   | 0                  | 0                   | 0                   | 0                    |
| <b>seq1543</b> | Firmicutes    | Clostridia   | 0                  | 0                   | 0                   | 0                    |
| <b>seq1546</b> | Firmicutes    | Clostridia   | 0                  | 0                   | 0                   | 0                    |
| <b>seq1570</b> | Firmicutes    | Clostridia   | 0                  | 0                   | 0                   | 0                    |
| <b>seq1579</b> | Firmicutes    | Clostridia   | 0                  | 0                   | 0                   | 0                    |
| <b>seq1585</b> | Firmicutes    | Clostridia   | 0                  | 0                   | 0                   | 0                    |
| <b>seq1587</b> | Firmicutes    | Clostridia   | 0                  | 0                   | 0                   | 0                    |
| <b>seq1590</b> | Firmicutes    | Clostridia   | 0                  | 0                   | 0                   | 0                    |
| <b>seq1600</b> | Firmicutes    | Clostridia   | 0                  | 0                   | 0                   | 0                    |
| <b>seq1604</b> | Firmicutes    | Clostridia   | 0                  | 0                   | 0                   | 0                    |
| <b>seq1607</b> | Firmicutes    | Clostridia   | 0                  | 0                   | 0                   | 0                    |
| <b>seq1611</b> | Firmicutes    | Clostridia   | 0                  | 0                   | 0                   | 0                    |
| <b>seq1615</b> | Firmicutes    | Clostridia   | 9                  | 0                   | 0                   | 0                    |
| <b>seq1622</b> | Firmicutes    | Clostridia   | 0                  | 0                   | 0                   | 0                    |
| <b>seq1623</b> | Firmicutes    | Clostridia   | 0                  | 0                   | 0                   | 0                    |
| <b>seq1625</b> | Firmicutes    | Clostridia   | 0                  | 0                   | 0                   | 0                    |
| <b>seq1630</b> | Firmicutes    | Clostridia   | 0                  | 0                   | 0                   | 0                    |
| <b>seq1632</b> | Firmicutes    | Clostridia   | 0                  | 0                   | 0                   | 0                    |



Sequence Count Table

|                | <b>Phylum</b> | <b>Class</b> | <b>Subject8WK0</b> | <b>Subject8WK12</b> | <b>Subject9WK0</b> | <b>Subject9WK12</b> |
|----------------|---------------|--------------|--------------------|---------------------|--------------------|---------------------|
| <b>seq1472</b> | Firmicutes    | Clostridia   | 0                  | 0                   | 0                  | 0                   |
| <b>seq1481</b> | Firmicutes    | Clostridia   | 0                  | 0                   | 0                  | 0                   |
| <b>seq1482</b> | Firmicutes    | Clostridia   | 9                  | 0                   | 0                  | 0                   |
| <b>seq1483</b> | Firmicutes    | Clostridia   | 0                  | 0                   | 0                  | 0                   |
| <b>seq1484</b> | Firmicutes    | Clostridia   | 0                  | 0                   | 7                  | 0                   |
| <b>seq1497</b> | Firmicutes    | Clostridia   | 0                  | 0                   | 0                  | 0                   |
| <b>seq1500</b> | Firmicutes    | Clostridia   | 0                  | 0                   | 0                  | 0                   |
| <b>seq1516</b> | Firmicutes    | Clostridia   | 0                  | 0                   | 0                  | 0                   |
| <b>seq1522</b> | Firmicutes    | Clostridia   | 0                  | 0                   | 0                  | 0                   |
| <b>seq1525</b> | Firmicutes    | Clostridia   | 0                  | 0                   | 0                  | 0                   |
| <b>seq1527</b> | Firmicutes    | Clostridia   | 0                  | 0                   | 0                  | 0                   |
| <b>seq1532</b> | Firmicutes    | Clostridia   | 0                  | 0                   | 0                  | 0                   |
| <b>seq1533</b> | Firmicutes    | Clostridia   | 0                  | 0                   | 0                  | 0                   |
| <b>seq1538</b> | Firmicutes    | Clostridia   | 0                  | 0                   | 0                  | 0                   |
| <b>seq1539</b> | Firmicutes    | Clostridia   | 0                  | 0                   | 0                  | 0                   |
| <b>seq1543</b> | Firmicutes    | Clostridia   | 0                  | 0                   | 0                  | 0                   |
| <b>seq1546</b> | Firmicutes    | Clostridia   | 0                  | 0                   | 0                  | 0                   |
| <b>seq1570</b> | Firmicutes    | Clostridia   | 0                  | 0                   | 0                  | 0                   |
| <b>seq1579</b> | Firmicutes    | Clostridia   | 0                  | 0                   | 0                  | 0                   |
| <b>seq1585</b> | Firmicutes    | Clostridia   | 0                  | 0                   | 0                  | 0                   |
| <b>seq1587</b> | Firmicutes    | Clostridia   | 0                  | 0                   | 0                  | 0                   |
| <b>seq1590</b> | Firmicutes    | Clostridia   | 0                  | 0                   | 0                  | 0                   |
| <b>seq1600</b> | Firmicutes    | Clostridia   | 0                  | 0                   | 0                  | 0                   |
| <b>seq1604</b> | Firmicutes    | Clostridia   | 0                  | 0                   | 0                  | 0                   |
| <b>seq1607</b> | Firmicutes    | Clostridia   | 0                  | 0                   | 0                  | 0                   |
| <b>seq1611</b> | Firmicutes    | Clostridia   | 0                  | 0                   | 0                  | 0                   |
| <b>seq1615</b> | Firmicutes    | Clostridia   | 0                  | 0                   | 0                  | 0                   |
| <b>seq1622</b> | Firmicutes    | Clostridia   | 0                  | 0                   | 0                  | 0                   |
| <b>seq1623</b> | Firmicutes    | Clostridia   | 0                  | 0                   | 0                  | 0                   |
| <b>seq1625</b> | Firmicutes    | Clostridia   | 0                  | 0                   | 0                  | 0                   |
| <b>seq1630</b> | Firmicutes    | Clostridia   | 0                  | 0                   | 3                  | 0                   |
| <b>seq1632</b> | Firmicutes    | Clostridia   | 0                  | 0                   | 0                  | 0                   |

Sequence Count Table

|                | <b>Phylum</b> | <b>Class</b> | <b>Subject10WK0</b> | <b>Subject10WK12</b> | <b>Subject22WK0</b> | <b>Subject22WK12</b> |
|----------------|---------------|--------------|---------------------|----------------------|---------------------|----------------------|
| <b>seq1472</b> | Firmicutes    | Clostridia   | 0                   | 0                    | 0                   | 0                    |
| <b>seq1481</b> | Firmicutes    | Clostridia   | 0                   | 0                    | 0                   | 0                    |
| <b>seq1482</b> | Firmicutes    | Clostridia   | 0                   | 0                    | 0                   | 0                    |
| <b>seq1483</b> | Firmicutes    | Clostridia   | 0                   | 0                    | 0                   | 0                    |
| <b>seq1484</b> | Firmicutes    | Clostridia   | 0                   | 0                    | 0                   | 0                    |
| <b>seq1497</b> | Firmicutes    | Clostridia   | 8                   | 0                    | 0                   | 0                    |
| <b>seq1500</b> | Firmicutes    | Clostridia   | 0                   | 0                    | 0                   | 0                    |
| <b>seq1516</b> | Firmicutes    | Clostridia   | 0                   | 0                    | 27                  | 0                    |
| <b>seq1522</b> | Firmicutes    | Clostridia   | 0                   | 0                    | 9                   | 0                    |
| <b>seq1525</b> | Firmicutes    | Clostridia   | 0                   | 0                    | 0                   | 0                    |
| <b>seq1527</b> | Firmicutes    | Clostridia   | 0                   | 0                    | 0                   | 0                    |
| <b>seq1532</b> | Firmicutes    | Clostridia   | 0                   | 0                    | 0                   | 0                    |
| <b>seq1533</b> | Firmicutes    | Clostridia   | 0                   | 0                    | 0                   | 0                    |
| <b>seq1538</b> | Firmicutes    | Clostridia   | 0                   | 0                    | 13                  | 12                   |
| <b>seq1539</b> | Firmicutes    | Clostridia   | 0                   | 0                    | 10                  | 15                   |
| <b>seq1543</b> | Firmicutes    | Clostridia   | 0                   | 0                    | 0                   | 0                    |
| <b>seq1546</b> | Firmicutes    | Clostridia   | 0                   | 0                    | 0                   | 0                    |
| <b>seq1570</b> | Firmicutes    | Clostridia   | 0                   | 0                    | 0                   | 0                    |
| <b>seq1579</b> | Firmicutes    | Clostridia   | 0                   | 0                    | 0                   | 0                    |
| <b>seq1585</b> | Firmicutes    | Clostridia   | 0                   | 0                    | 0                   | 0                    |
| <b>seq1587</b> | Firmicutes    | Clostridia   | 0                   | 0                    | 0                   | 0                    |
| <b>seq1590</b> | Firmicutes    | Clostridia   | 0                   | 0                    | 0                   | 0                    |
| <b>seq1600</b> | Firmicutes    | Clostridia   | 0                   | 0                    | 0                   | 0                    |
| <b>seq1604</b> | Firmicutes    | Clostridia   | 0                   | 0                    | 0                   | 0                    |
| <b>seq1607</b> | Firmicutes    | Clostridia   | 0                   | 0                    | 0                   | 12                   |
| <b>seq1611</b> | Firmicutes    | Clostridia   | 0                   | 0                    | 0                   | 0                    |
| <b>seq1615</b> | Firmicutes    | Clostridia   | 0                   | 0                    | 0                   | 0                    |
| <b>seq1622</b> | Firmicutes    | Clostridia   | 0                   | 0                    | 0                   | 18                   |
| <b>seq1623</b> | Firmicutes    | Clostridia   | 0                   | 0                    | 0                   | 0                    |
| <b>seq1625</b> | Firmicutes    | Clostridia   | 0                   | 0                    | 0                   | 0                    |
| <b>seq1630</b> | Firmicutes    | Clostridia   | 0                   | 0                    | 0                   | 0                    |
| <b>seq1632</b> | Firmicutes    | Clostridia   | 0                   | 0                    | 0                   | 0                    |

Sequence Count Table

|                | <b>Phylum</b> | <b>Class</b> | <b>Subject23WK0</b> | <b>Subject23WK12</b> | <b>Subject24WK0</b> | <b>Subject24WK12</b> |
|----------------|---------------|--------------|---------------------|----------------------|---------------------|----------------------|
| <b>seq1472</b> | Firmicutes    | Clostridia   | 0                   | 0                    | 0                   | 0                    |
| <b>seq1481</b> | Firmicutes    | Clostridia   | 0                   | 0                    | 0                   | 0                    |
| <b>seq1482</b> | Firmicutes    | Clostridia   | 0                   | 0                    | 0                   | 0                    |
| <b>seq1483</b> | Firmicutes    | Clostridia   | 0                   | 0                    | 0                   | 0                    |
| <b>seq1484</b> | Firmicutes    | Clostridia   | 0                   | 0                    | 0                   | 0                    |
| <b>seq1497</b> | Firmicutes    | Clostridia   | 0                   | 0                    | 0                   | 0                    |
| <b>seq1500</b> | Firmicutes    | Clostridia   | 0                   | 0                    | 0                   | 0                    |
| <b>seq1516</b> | Firmicutes    | Clostridia   | 0                   | 0                    | 0                   | 0                    |
| <b>seq1522</b> | Firmicutes    | Clostridia   | 0                   | 6                    | 0                   | 0                    |
| <b>seq1525</b> | Firmicutes    | Clostridia   | 0                   | 0                    | 0                   | 0                    |
| <b>seq1527</b> | Firmicutes    | Clostridia   | 0                   | 0                    | 0                   | 0                    |
| <b>seq1532</b> | Firmicutes    | Clostridia   | 0                   | 0                    | 0                   | 0                    |
| <b>seq1533</b> | Firmicutes    | Clostridia   | 0                   | 0                    | 0                   | 0                    |
| <b>seq1538</b> | Firmicutes    | Clostridia   | 0                   | 0                    | 0                   | 0                    |
| <b>seq1539</b> | Firmicutes    | Clostridia   | 0                   | 0                    | 0                   | 0                    |
| <b>seq1543</b> | Firmicutes    | Clostridia   | 0                   | 0                    | 0                   | 0                    |
| <b>seq1546</b> | Firmicutes    | Clostridia   | 0                   | 0                    | 0                   | 0                    |
| <b>seq1570</b> | Firmicutes    | Clostridia   | 22                  | 0                    | 0                   | 0                    |
| <b>seq1579</b> | Firmicutes    | Clostridia   | 0                   | 0                    | 0                   | 0                    |
| <b>seq1585</b> | Firmicutes    | Clostridia   | 0                   | 21                   | 0                   | 0                    |
| <b>seq1587</b> | Firmicutes    | Clostridia   | 0                   | 0                    | 0                   | 0                    |
| <b>seq1590</b> | Firmicutes    | Clostridia   | 0                   | 0                    | 0                   | 0                    |
| <b>seq1600</b> | Firmicutes    | Clostridia   | 0                   | 0                    | 0                   | 0                    |
| <b>seq1604</b> | Firmicutes    | Clostridia   | 0                   | 0                    | 0                   | 0                    |
| <b>seq1607</b> | Firmicutes    | Clostridia   | 0                   | 0                    | 0                   | 0                    |
| <b>seq1611</b> | Firmicutes    | Clostridia   | 0                   | 0                    | 0                   | 0                    |
| <b>seq1615</b> | Firmicutes    | Clostridia   | 0                   | 0                    | 0                   | 0                    |
| <b>seq1622</b> | Firmicutes    | Clostridia   | 0                   | 0                    | 0                   | 0                    |
| <b>seq1623</b> | Firmicutes    | Clostridia   | 0                   | 0                    | 0                   | 18                   |
| <b>seq1625</b> | Firmicutes    | Clostridia   | 0                   | 0                    | 0                   | 0                    |
| <b>seq1630</b> | Firmicutes    | Clostridia   | 0                   | 0                    | 0                   | 0                    |
| <b>seq1632</b> | Firmicutes    | Clostridia   | 0                   | 0                    | 0                   | 13                   |

Sequence Count Table

|                | <b>Phylum</b> | <b>Class</b> | <b>Subject11WK0</b> | <b>Subject11WK12</b> | <b>Subject12WK0</b> | <b>Subject12WK12</b> |
|----------------|---------------|--------------|---------------------|----------------------|---------------------|----------------------|
| <b>seq1472</b> | Firmicutes    | Clostridia   | 0                   | 0                    | 13                  | 19                   |
| <b>seq1481</b> | Firmicutes    | Clostridia   | 0                   | 0                    | 0                   | 0                    |
| <b>seq1482</b> | Firmicutes    | Clostridia   | 0                   | 0                    | 0                   | 0                    |
| <b>seq1483</b> | Firmicutes    | Clostridia   | 0                   | 0                    | 0                   | 0                    |
| <b>seq1484</b> | Firmicutes    | Clostridia   | 0                   | 0                    | 0                   | 0                    |
| <b>seq1497</b> | Firmicutes    | Clostridia   | 0                   | 0                    | 0                   | 0                    |
| <b>seq1500</b> | Firmicutes    | Clostridia   | 0                   | 0                    | 0                   | 0                    |
| <b>seq1516</b> | Firmicutes    | Clostridia   | 0                   | 0                    | 0                   | 0                    |
| <b>seq1522</b> | Firmicutes    | Clostridia   | 0                   | 0                    | 0                   | 0                    |
| <b>seq1525</b> | Firmicutes    | Clostridia   | 0                   | 0                    | 0                   | 0                    |
| <b>seq1527</b> | Firmicutes    | Clostridia   | 0                   | 0                    | 0                   | 0                    |
| <b>seq1532</b> | Firmicutes    | Clostridia   | 2                   | 0                    | 0                   | 0                    |
| <b>seq1533</b> | Firmicutes    | Clostridia   | 19                  | 0                    | 0                   | 0                    |
| <b>seq1538</b> | Firmicutes    | Clostridia   | 0                   | 0                    | 0                   | 0                    |
| <b>seq1539</b> | Firmicutes    | Clostridia   | 0                   | 0                    | 0                   | 0                    |
| <b>seq1543</b> | Firmicutes    | Clostridia   | 0                   | 0                    | 0                   | 0                    |
| <b>seq1546</b> | Firmicutes    | Clostridia   | 0                   | 0                    | 0                   | 0                    |
| <b>seq1570</b> | Firmicutes    | Clostridia   | 0                   | 0                    | 0                   | 0                    |
| <b>seq1579</b> | Firmicutes    | Clostridia   | 0                   | 0                    | 0                   | 0                    |
| <b>seq1585</b> | Firmicutes    | Clostridia   | 0                   | 0                    | 0                   | 0                    |
| <b>seq1587</b> | Firmicutes    | Clostridia   | 0                   | 0                    | 0                   | 0                    |
| <b>seq1590</b> | Firmicutes    | Clostridia   | 0                   | 0                    | 0                   | 0                    |
| <b>seq1600</b> | Firmicutes    | Clostridia   | 0                   | 0                    | 0                   | 0                    |
| <b>seq1604</b> | Firmicutes    | Clostridia   | 0                   | 0                    | 0                   | 0                    |
| <b>seq1607</b> | Firmicutes    | Clostridia   | 0                   | 0                    | 0                   | 0                    |
| <b>seq1611</b> | Firmicutes    | Clostridia   | 0                   | 0                    | 0                   | 0                    |
| <b>seq1615</b> | Firmicutes    | Clostridia   | 0                   | 0                    | 0                   | 0                    |
| <b>seq1622</b> | Firmicutes    | Clostridia   | 0                   | 0                    | 0                   | 0                    |
| <b>seq1623</b> | Firmicutes    | Clostridia   | 0                   | 0                    | 0                   | 0                    |
| <b>seq1625</b> | Firmicutes    | Clostridia   | 0                   | 0                    | 0                   | 0                    |
| <b>seq1630</b> | Firmicutes    | Clostridia   | 0                   | 0                    | 0                   | 0                    |
| <b>seq1632</b> | Firmicutes    | Clostridia   | 0                   | 0                    | 0                   | 0                    |

Sequence Count Table

|                | <b>Phylum</b> | <b>Class</b> | <b>Subject25WK0</b> | <b>Subject25WK12</b> | <b>Subject38WK0</b> | <b>Subject38WK12</b> |
|----------------|---------------|--------------|---------------------|----------------------|---------------------|----------------------|
| <b>seq1472</b> | Firmicutes    | Clostridia   | 0                   | 0                    | 0                   | 0                    |
| <b>seq1481</b> | Firmicutes    | Clostridia   | 0                   | 0                    | 0                   | 0                    |
| <b>seq1482</b> | Firmicutes    | Clostridia   | 0                   | 0                    | 0                   | 0                    |
| <b>seq1483</b> | Firmicutes    | Clostridia   | 0                   | 0                    | 0                   | 0                    |
| <b>seq1484</b> | Firmicutes    | Clostridia   | 0                   | 0                    | 0                   | 0                    |
| <b>seq1497</b> | Firmicutes    | Clostridia   | 0                   | 0                    | 0                   | 0                    |
| <b>seq1500</b> | Firmicutes    | Clostridia   | 0                   | 0                    | 0                   | 0                    |
| <b>seq1516</b> | Firmicutes    | Clostridia   | 0                   | 0                    | 0                   | 0                    |
| <b>seq1522</b> | Firmicutes    | Clostridia   | 0                   | 0                    | 0                   | 0                    |
| <b>seq1525</b> | Firmicutes    | Clostridia   | 0                   | 0                    | 0                   | 0                    |
| <b>seq1527</b> | Firmicutes    | Clostridia   | 0                   | 0                    | 0                   | 0                    |
| <b>seq1532</b> | Firmicutes    | Clostridia   | 0                   | 0                    | 0                   | 0                    |
| <b>seq1533</b> | Firmicutes    | Clostridia   | 0                   | 0                    | 0                   | 0                    |
| <b>seq1538</b> | Firmicutes    | Clostridia   | 0                   | 0                    | 0                   | 0                    |
| <b>seq1539</b> | Firmicutes    | Clostridia   | 0                   | 0                    | 0                   | 0                    |
| <b>seq1543</b> | Firmicutes    | Clostridia   | 0                   | 0                    | 0                   | 0                    |
| <b>seq1546</b> | Firmicutes    | Clostridia   | 0                   | 0                    | 0                   | 0                    |
| <b>seq1570</b> | Firmicutes    | Clostridia   | 0                   | 0                    | 0                   | 0                    |
| <b>seq1579</b> | Firmicutes    | Clostridia   | 0                   | 0                    | 0                   | 0                    |
| <b>seq1585</b> | Firmicutes    | Clostridia   | 0                   | 0                    | 0                   | 0                    |
| <b>seq1587</b> | Firmicutes    | Clostridia   | 21                  | 0                    | 0                   | 0                    |
| <b>seq1590</b> | Firmicutes    | Clostridia   | 0                   | 0                    | 0                   | 0                    |
| <b>seq1600</b> | Firmicutes    | Clostridia   | 0                   | 0                    | 0                   | 0                    |
| <b>seq1604</b> | Firmicutes    | Clostridia   | 0                   | 0                    | 0                   | 0                    |
| <b>seq1607</b> | Firmicutes    | Clostridia   | 0                   | 0                    | 0                   | 0                    |
| <b>seq1611</b> | Firmicutes    | Clostridia   | 0                   | 0                    | 0                   | 0                    |
| <b>seq1615</b> | Firmicutes    | Clostridia   | 0                   | 0                    | 0                   | 0                    |
| <b>seq1622</b> | Firmicutes    | Clostridia   | 0                   | 0                    | 0                   | 0                    |
| <b>seq1623</b> | Firmicutes    | Clostridia   | 0                   | 0                    | 0                   | 0                    |
| <b>seq1625</b> | Firmicutes    | Clostridia   | 0                   | 0                    | 0                   | 0                    |
| <b>seq1630</b> | Firmicutes    | Clostridia   | 0                   | 0                    | 0                   | 0                    |
| <b>seq1632</b> | Firmicutes    | Clostridia   | 0                   | 0                    | 0                   | 0                    |

Sequence Count Table

|                | <b>Phylum</b> | <b>Class</b> | <b>Subject31WK0</b> | <b>Subject31WK12</b> | <b>Subject32WK0</b> | <b>Subject32WK12</b> |
|----------------|---------------|--------------|---------------------|----------------------|---------------------|----------------------|
| <b>seq1472</b> | Firmicutes    | Clostridia   | 0                   | 0                    | 0                   | 0                    |
| <b>seq1481</b> | Firmicutes    | Clostridia   | 0                   | 0                    | 0                   | 0                    |
| <b>seq1482</b> | Firmicutes    | Clostridia   | 0                   | 0                    | 0                   | 0                    |
| <b>seq1483</b> | Firmicutes    | Clostridia   | 0                   | 0                    | 0                   | 0                    |
| <b>seq1484</b> | Firmicutes    | Clostridia   | 0                   | 0                    | 0                   | 0                    |
| <b>seq1497</b> | Firmicutes    | Clostridia   | 0                   | 0                    | 0                   | 0                    |
| <b>seq1500</b> | Firmicutes    | Clostridia   | 0                   | 0                    | 0                   | 0                    |
| <b>seq1516</b> | Firmicutes    | Clostridia   | 0                   | 0                    | 0                   | 0                    |
| <b>seq1522</b> | Firmicutes    | Clostridia   | 0                   | 0                    | 0                   | 0                    |
| <b>seq1525</b> | Firmicutes    | Clostridia   | 0                   | 0                    | 0                   | 0                    |
| <b>seq1527</b> | Firmicutes    | Clostridia   | 0                   | 0                    | 0                   | 0                    |
| <b>seq1532</b> | Firmicutes    | Clostridia   | 0                   | 0                    | 0                   | 0                    |
| <b>seq1533</b> | Firmicutes    | Clostridia   | 0                   | 0                    | 0                   | 0                    |
| <b>seq1538</b> | Firmicutes    | Clostridia   | 0                   | 0                    | 0                   | 0                    |
| <b>seq1539</b> | Firmicutes    | Clostridia   | 0                   | 0                    | 0                   | 0                    |
| <b>seq1543</b> | Firmicutes    | Clostridia   | 0                   | 0                    | 10                  | 0                    |
| <b>seq1546</b> | Firmicutes    | Clostridia   | 0                   | 0                    | 0                   | 0                    |
| <b>seq1570</b> | Firmicutes    | Clostridia   | 0                   | 0                    | 0                   | 0                    |
| <b>seq1579</b> | Firmicutes    | Clostridia   | 0                   | 0                    | 0                   | 0                    |
| <b>seq1585</b> | Firmicutes    | Clostridia   | 0                   | 0                    | 0                   | 0                    |
| <b>seq1587</b> | Firmicutes    | Clostridia   | 0                   | 0                    | 0                   | 0                    |
| <b>seq1590</b> | Firmicutes    | Clostridia   | 0                   | 0                    | 0                   | 0                    |
| <b>seq1600</b> | Firmicutes    | Clostridia   | 0                   | 0                    | 0                   | 0                    |
| <b>seq1604</b> | Firmicutes    | Clostridia   | 0                   | 0                    | 0                   | 0                    |
| <b>seq1607</b> | Firmicutes    | Clostridia   | 0                   | 0                    | 0                   | 0                    |
| <b>seq1611</b> | Firmicutes    | Clostridia   | 0                   | 0                    | 0                   | 0                    |
| <b>seq1615</b> | Firmicutes    | Clostridia   | 0                   | 0                    | 0                   | 0                    |
| <b>seq1622</b> | Firmicutes    | Clostridia   | 0                   | 0                    | 0                   | 0                    |
| <b>seq1623</b> | Firmicutes    | Clostridia   | 0                   | 0                    | 0                   | 0                    |
| <b>seq1625</b> | Firmicutes    | Clostridia   | 0                   | 0                    | 0                   | 0                    |
| <b>seq1630</b> | Firmicutes    | Clostridia   | 0                   | 0                    | 0                   | 0                    |
| <b>seq1632</b> | Firmicutes    | Clostridia   | 0                   | 0                    | 0                   | 0                    |

Sequence Count Table

|                | <b>Phylum</b> | <b>Class</b> | <b>Subject13WK0</b> | <b>Subject13WK12</b> | <b>Subject39WK0</b> | <b>Subject39WK12</b> |
|----------------|---------------|--------------|---------------------|----------------------|---------------------|----------------------|
| <b>seq1472</b> | Firmicutes    | Clostridia   | 0                   | 0                    | 0                   | 0                    |
| <b>seq1481</b> | Firmicutes    | Clostridia   | 0                   | 0                    | 0                   | 0                    |
| <b>seq1482</b> | Firmicutes    | Clostridia   | 0                   | 0                    | 0                   | 0                    |
| <b>seq1483</b> | Firmicutes    | Clostridia   | 0                   | 0                    | 0                   | 0                    |
| <b>seq1484</b> | Firmicutes    | Clostridia   | 0                   | 0                    | 0                   | 0                    |
| <b>seq1497</b> | Firmicutes    | Clostridia   | 0                   | 0                    | 0                   | 0                    |
| <b>seq1500</b> | Firmicutes    | Clostridia   | 0                   | 0                    | 0                   | 0                    |
| <b>seq1516</b> | Firmicutes    | Clostridia   | 0                   | 0                    | 0                   | 0                    |
| <b>seq1522</b> | Firmicutes    | Clostridia   | 0                   | 0                    | 0                   | 0                    |
| <b>seq1525</b> | Firmicutes    | Clostridia   | 0                   | 0                    | 0                   | 0                    |
| <b>seq1527</b> | Firmicutes    | Clostridia   | 0                   | 0                    | 0                   | 0                    |
| <b>seq1532</b> | Firmicutes    | Clostridia   | 0                   | 0                    | 0                   | 0                    |
| <b>seq1533</b> | Firmicutes    | Clostridia   | 0                   | 0                    | 0                   | 0                    |
| <b>seq1538</b> | Firmicutes    | Clostridia   | 0                   | 0                    | 0                   | 0                    |
| <b>seq1539</b> | Firmicutes    | Clostridia   | 0                   | 0                    | 0                   | 0                    |
| <b>seq1543</b> | Firmicutes    | Clostridia   | 0                   | 0                    | 0                   | 0                    |
| <b>seq1546</b> | Firmicutes    | Clostridia   | 0                   | 0                    | 0                   | 0                    |
| <b>seq1570</b> | Firmicutes    | Clostridia   | 0                   | 0                    | 0                   | 0                    |
| <b>seq1579</b> | Firmicutes    | Clostridia   | 0                   | 0                    | 0                   | 0                    |
| <b>seq1585</b> | Firmicutes    | Clostridia   | 0                   | 0                    | 0                   | 0                    |
| <b>seq1587</b> | Firmicutes    | Clostridia   | 0                   | 0                    | 0                   | 0                    |
| <b>seq1590</b> | Firmicutes    | Clostridia   | 0                   | 0                    | 0                   | 0                    |
| <b>seq1600</b> | Firmicutes    | Clostridia   | 0                   | 0                    | 0                   | 0                    |
| <b>seq1604</b> | Firmicutes    | Clostridia   | 0                   | 0                    | 0                   | 0                    |
| <b>seq1607</b> | Firmicutes    | Clostridia   | 0                   | 7                    | 0                   | 0                    |
| <b>seq1611</b> | Firmicutes    | Clostridia   | 0                   | 19                   | 0                   | 0                    |
| <b>seq1615</b> | Firmicutes    | Clostridia   | 0                   | 0                    | 0                   | 0                    |
| <b>seq1622</b> | Firmicutes    | Clostridia   | 0                   | 0                    | 0                   | 0                    |
| <b>seq1623</b> | Firmicutes    | Clostridia   | 0                   | 0                    | 0                   | 0                    |
| <b>seq1625</b> | Firmicutes    | Clostridia   | 0                   | 18                   | 0                   | 0                    |
| <b>seq1630</b> | Firmicutes    | Clostridia   | 0                   | 0                    | 0                   | 0                    |
| <b>seq1632</b> | Firmicutes    | Clostridia   | 0                   | 0                    | 0                   | 0                    |

Sequence Count Table

|                | <b>Phylum</b> | <b>Class</b> | <b>Subject26WK0</b> | <b>Subject26WK12</b> | <b>Subject14WK0</b> | <b>Subject14WK12</b> |
|----------------|---------------|--------------|---------------------|----------------------|---------------------|----------------------|
| <b>seq1472</b> | Firmicutes    | Clostridia   | 0                   | 0                    | 0                   | 0                    |
| <b>seq1481</b> | Firmicutes    | Clostridia   | 0                   | 0                    | 0                   | 0                    |
| <b>seq1482</b> | Firmicutes    | Clostridia   | 0                   | 0                    | 0                   | 0                    |
| <b>seq1483</b> | Firmicutes    | Clostridia   | 0                   | 0                    | 0                   | 0                    |
| <b>seq1484</b> | Firmicutes    | Clostridia   | 0                   | 0                    | 0                   | 0                    |
| <b>seq1497</b> | Firmicutes    | Clostridia   | 0                   | 0                    | 0                   | 0                    |
| <b>seq1500</b> | Firmicutes    | Clostridia   | 0                   | 0                    | 0                   | 22                   |
| <b>seq1516</b> | Firmicutes    | Clostridia   | 0                   | 0                    | 0                   | 0                    |
| <b>seq1522</b> | Firmicutes    | Clostridia   | 0                   | 0                    | 0                   | 0                    |
| <b>seq1525</b> | Firmicutes    | Clostridia   | 0                   | 0                    | 0                   | 0                    |
| <b>seq1527</b> | Firmicutes    | Clostridia   | 0                   | 0                    | 0                   | 0                    |
| <b>seq1532</b> | Firmicutes    | Clostridia   | 0                   | 0                    | 0                   | 0                    |
| <b>seq1533</b> | Firmicutes    | Clostridia   | 0                   | 0                    | 0                   | 0                    |
| <b>seq1538</b> | Firmicutes    | Clostridia   | 0                   | 0                    | 0                   | 0                    |
| <b>seq1539</b> | Firmicutes    | Clostridia   | 0                   | 0                    | 0                   | 0                    |
| <b>seq1543</b> | Firmicutes    | Clostridia   | 0                   | 0                    | 0                   | 0                    |
| <b>seq1546</b> | Firmicutes    | Clostridia   | 0                   | 0                    | 0                   | 0                    |
| <b>seq1570</b> | Firmicutes    | Clostridia   | 0                   | 0                    | 0                   | 0                    |
| <b>seq1579</b> | Firmicutes    | Clostridia   | 0                   | 0                    | 0                   | 0                    |
| <b>seq1585</b> | Firmicutes    | Clostridia   | 0                   | 0                    | 0                   | 0                    |
| <b>seq1587</b> | Firmicutes    | Clostridia   | 0                   | 0                    | 0                   | 0                    |
| <b>seq1590</b> | Firmicutes    | Clostridia   | 0                   | 0                    | 0                   | 0                    |
| <b>seq1600</b> | Firmicutes    | Clostridia   | 0                   | 0                    | 0                   | 20                   |
| <b>seq1604</b> | Firmicutes    | Clostridia   | 0                   | 0                    | 0                   | 0                    |
| <b>seq1607</b> | Firmicutes    | Clostridia   | 0                   | 0                    | 0                   | 0                    |
| <b>seq1611</b> | Firmicutes    | Clostridia   | 0                   | 0                    | 0                   | 0                    |
| <b>seq1615</b> | Firmicutes    | Clostridia   | 0                   | 0                    | 0                   | 0                    |
| <b>seq1622</b> | Firmicutes    | Clostridia   | 0                   | 0                    | 0                   | 0                    |
| <b>seq1623</b> | Firmicutes    | Clostridia   | 0                   | 0                    | 0                   | 0                    |
| <b>seq1625</b> | Firmicutes    | Clostridia   | 0                   | 0                    | 0                   | 0                    |
| <b>seq1630</b> | Firmicutes    | Clostridia   | 0                   | 0                    | 0                   | 0                    |
| <b>seq1632</b> | Firmicutes    | Clostridia   | 0                   | 0                    | 0                   | 0                    |



Sequence Count Table

|                | <b>Phylum</b> | <b>Class</b> | <b>Subject27WK0</b> | <b>Subject27WK12</b> | <b>Subject15WK0</b> | <b>Subject15WK12</b> |
|----------------|---------------|--------------|---------------------|----------------------|---------------------|----------------------|
| <b>seq1472</b> | Firmicutes    | Clostridia   | 0                   | 0                    | 0                   | 0                    |
| <b>seq1481</b> | Firmicutes    | Clostridia   | 0                   | 0                    | 0                   | 0                    |
| <b>seq1482</b> | Firmicutes    | Clostridia   | 0                   | 0                    | 0                   | 0                    |
| <b>seq1483</b> | Firmicutes    | Clostridia   | 0                   | 0                    | 0                   | 0                    |
| <b>seq1484</b> | Firmicutes    | Clostridia   | 0                   | 0                    | 0                   | 0                    |
| <b>seq1497</b> | Firmicutes    | Clostridia   | 0                   | 0                    | 0                   | 0                    |
| <b>seq1500</b> | Firmicutes    | Clostridia   | 0                   | 0                    | 0                   | 0                    |
| <b>seq1516</b> | Firmicutes    | Clostridia   | 0                   | 0                    | 0                   | 0                    |
| <b>seq1522</b> | Firmicutes    | Clostridia   | 0                   | 0                    | 0                   | 0                    |
| <b>seq1525</b> | Firmicutes    | Clostridia   | 0                   | 0                    | 0                   | 0                    |
| <b>seq1527</b> | Firmicutes    | Clostridia   | 0                   | 0                    | 0                   | 0                    |
| <b>seq1532</b> | Firmicutes    | Clostridia   | 0                   | 0                    | 0                   | 0                    |
| <b>seq1533</b> | Firmicutes    | Clostridia   | 0                   | 0                    | 0                   | 0                    |
| <b>seq1538</b> | Firmicutes    | Clostridia   | 0                   | 0                    | 0                   | 0                    |
| <b>seq1539</b> | Firmicutes    | Clostridia   | 0                   | 0                    | 0                   | 0                    |
| <b>seq1543</b> | Firmicutes    | Clostridia   | 0                   | 0                    | 0                   | 0                    |
| <b>seq1546</b> | Firmicutes    | Clostridia   | 0                   | 0                    | 0                   | 0                    |
| <b>seq1570</b> | Firmicutes    | Clostridia   | 0                   | 0                    | 0                   | 0                    |
| <b>seq1579</b> | Firmicutes    | Clostridia   | 0                   | 0                    | 0                   | 0                    |
| <b>seq1585</b> | Firmicutes    | Clostridia   | 0                   | 0                    | 0                   | 0                    |
| <b>seq1587</b> | Firmicutes    | Clostridia   | 0                   | 0                    | 0                   | 0                    |
| <b>seq1590</b> | Firmicutes    | Clostridia   | 0                   | 0                    | 0                   | 0                    |
| <b>seq1600</b> | Firmicutes    | Clostridia   | 0                   | 0                    | 0                   | 0                    |
| <b>seq1604</b> | Firmicutes    | Clostridia   | 0                   | 0                    | 0                   | 0                    |
| <b>seq1607</b> | Firmicutes    | Clostridia   | 0                   | 0                    | 0                   | 0                    |
| <b>seq1611</b> | Firmicutes    | Clostridia   | 0                   | 0                    | 0                   | 0                    |
| <b>seq1615</b> | Firmicutes    | Clostridia   | 0                   | 0                    | 0                   | 0                    |
| <b>seq1622</b> | Firmicutes    | Clostridia   | 0                   | 0                    | 0                   | 0                    |
| <b>seq1623</b> | Firmicutes    | Clostridia   | 0                   | 0                    | 0                   | 0                    |
| <b>seq1625</b> | Firmicutes    | Clostridia   | 0                   | 0                    | 0                   | 0                    |
| <b>seq1630</b> | Firmicutes    | Clostridia   | 0                   | 0                    | 0                   | 0                    |
| <b>seq1632</b> | Firmicutes    | Clostridia   | 0                   | 0                    | 0                   | 0                    |

Sequence Count Table

|                | <b>Phylum</b> | <b>Class</b> | <b>Δ</b> |  |  |  |
|----------------|---------------|--------------|----------|--|--|--|
| <b>seq1472</b> | Firmicutes    | Clostridia   |          |  |  |  |
| <b>seq1481</b> | Firmicutes    | Clostridia   |          |  |  |  |
| <b>seq1482</b> | Firmicutes    | Clostridia   |          |  |  |  |
| <b>seq1483</b> | Firmicutes    | Clostridia   |          |  |  |  |
| <b>seq1484</b> | Firmicutes    | Clostridia   |          |  |  |  |
| <b>seq1497</b> | Firmicutes    | Clostridia   |          |  |  |  |
| <b>seq1500</b> | Firmicutes    | Clostridia   |          |  |  |  |
| <b>seq1516</b> | Firmicutes    | Clostridia   |          |  |  |  |
| <b>seq1522</b> | Firmicutes    | Clostridia   |          |  |  |  |
| <b>seq1525</b> | Firmicutes    | Clostridia   |          |  |  |  |
| <b>seq1527</b> | Firmicutes    | Clostridia   |          |  |  |  |
| <b>seq1532</b> | Firmicutes    | Clostridia   |          |  |  |  |
| <b>seq1533</b> | Firmicutes    | Clostridia   |          |  |  |  |
| <b>seq1538</b> | Firmicutes    | Clostridia   |          |  |  |  |
| <b>seq1539</b> | Firmicutes    | Clostridia   |          |  |  |  |
| <b>seq1543</b> | Firmicutes    | Clostridia   |          |  |  |  |
| <b>seq1546</b> | Firmicutes    | Clostridia   |          |  |  |  |
| <b>seq1570</b> | Firmicutes    | Clostridia   |          |  |  |  |
| <b>seq1579</b> | Firmicutes    | Clostridia   |          |  |  |  |
| <b>seq1585</b> | Firmicutes    | Clostridia   |          |  |  |  |
| <b>seq1587</b> | Firmicutes    | Clostridia   |          |  |  |  |
| <b>seq1590</b> | Firmicutes    | Clostridia   |          |  |  |  |
| <b>seq1600</b> | Firmicutes    | Clostridia   |          |  |  |  |
| <b>seq1604</b> | Firmicutes    | Clostridia   |          |  |  |  |
| <b>seq1607</b> | Firmicutes    | Clostridia   |          |  |  |  |
| <b>seq1611</b> | Firmicutes    | Clostridia   |          |  |  |  |
| <b>seq1615</b> | Firmicutes    | Clostridia   |          |  |  |  |
| <b>seq1622</b> | Firmicutes    | Clostridia   |          |  |  |  |
| <b>seq1623</b> | Firmicutes    | Clostridia   |          |  |  |  |
| <b>seq1625</b> | Firmicutes    | Clostridia   |          |  |  |  |
| <b>seq1630</b> | Firmicutes    | Clostridia   |          |  |  |  |
| <b>seq1632</b> | Firmicutes    | Clostridia   |          |  |  |  |

Sequence Count Table

|                | <b>Phylum</b> | <b>Class</b> | <b>Order</b>  | <b>Family</b>   |
|----------------|---------------|--------------|---------------|-----------------|
| <b>seq1633</b> | Firmicutes    | Clostridia   | Clostridiales | Ruminococcaceae |
| <b>seq1639</b> | Firmicutes    | Clostridia   | Clostridiales | Ruminococcaceae |
| <b>seq1641</b> | Firmicutes    | Clostridia   | Clostridiales | Ruminococcaceae |
| <b>seq1648</b> | Firmicutes    | Clostridia   | Clostridiales | Ruminococcaceae |
| <b>seq1651</b> | Firmicutes    | Clostridia   | Clostridiales | Ruminococcaceae |
| <b>seq1657</b> | Firmicutes    | Clostridia   | Clostridiales | Ruminococcaceae |
| <b>seq1659</b> | Firmicutes    | Clostridia   | Clostridiales | Ruminococcaceae |
| <b>seq1671</b> | Firmicutes    | Clostridia   | Clostridiales | Ruminococcaceae |
| <b>seq1675</b> | Firmicutes    | Clostridia   | Clostridiales | Ruminococcaceae |
| <b>seq1676</b> | Firmicutes    | Clostridia   | Clostridiales | Ruminococcaceae |
| <b>seq1679</b> | Firmicutes    | Clostridia   | Clostridiales | Ruminococcaceae |
| <b>seq1686</b> | Firmicutes    | Clostridia   | Clostridiales | Ruminococcaceae |
| <b>seq1691</b> | Firmicutes    | Clostridia   | Clostridiales | Ruminococcaceae |
| <b>seq1696</b> | Firmicutes    | Clostridia   | Clostridiales | Ruminococcaceae |
| <b>seq1697</b> | Firmicutes    | Clostridia   | Clostridiales | Ruminococcaceae |
| <b>seq1704</b> | Firmicutes    | Clostridia   | Clostridiales | Ruminococcaceae |
| <b>seq1712</b> | Firmicutes    | Clostridia   | Clostridiales | Ruminococcaceae |
| <b>seq1717</b> | Firmicutes    | Clostridia   | Clostridiales | Ruminococcaceae |
| <b>seq1722</b> | Firmicutes    | Clostridia   | Clostridiales | Ruminococcaceae |
| <b>seq1724</b> | Firmicutes    | Clostridia   | Clostridiales | Ruminococcaceae |
| <b>seq1729</b> | Firmicutes    | Clostridia   | Clostridiales | Ruminococcaceae |
| <b>seq1730</b> | Firmicutes    | Clostridia   | Clostridiales | Ruminococcaceae |
| <b>seq1737</b> | Firmicutes    | Clostridia   | Clostridiales | Ruminococcaceae |
| <b>seq1740</b> | Firmicutes    | Clostridia   | Clostridiales | Ruminococcaceae |
| <b>seq1743</b> | Firmicutes    | Clostridia   | Clostridiales | Ruminococcaceae |
| <b>seq1746</b> | Firmicutes    | Clostridia   | Clostridiales | Ruminococcaceae |
| <b>seq1747</b> | Firmicutes    | Clostridia   | Clostridiales | Ruminococcaceae |
| <b>seq1758</b> | Firmicutes    | Clostridia   | Clostridiales | Ruminococcaceae |
| <b>seq1760</b> | Firmicutes    | Clostridia   | Clostridiales | Ruminococcaceae |
| <b>seq1763</b> | Firmicutes    | Clostridia   | Clostridiales | Ruminococcaceae |
| <b>seq1767</b> | Firmicutes    | Clostridia   | Clostridiales | Ruminococcaceae |
| <b>seq1770</b> | Firmicutes    | Clostridia   | Clostridiales | Ruminococcaceae |

Sequence Count Table

|                | <b>Phylum</b> | <b>Class</b> | <b>Genus</b> | <b>Species</b> |
|----------------|---------------|--------------|--------------|----------------|
| <b>seq1633</b> | Firmicutes    | Clostridia   |              |                |
| <b>seq1639</b> | Firmicutes    | Clostridia   |              |                |
| <b>seq1641</b> | Firmicutes    | Clostridia   |              |                |
| <b>seq1648</b> | Firmicutes    | Clostridia   |              |                |
| <b>seq1651</b> | Firmicutes    | Clostridia   |              |                |
| <b>seq1657</b> | Firmicutes    | Clostridia   |              |                |
| <b>seq1659</b> | Firmicutes    | Clostridia   |              |                |
| <b>seq1671</b> | Firmicutes    | Clostridia   |              |                |
| <b>seq1675</b> | Firmicutes    | Clostridia   |              |                |
| <b>seq1676</b> | Firmicutes    | Clostridia   |              |                |
| <b>seq1679</b> | Firmicutes    | Clostridia   |              |                |
| <b>seq1686</b> | Firmicutes    | Clostridia   |              |                |
| <b>seq1691</b> | Firmicutes    | Clostridia   |              |                |
| <b>seq1696</b> | Firmicutes    | Clostridia   |              |                |
| <b>seq1697</b> | Firmicutes    | Clostridia   |              |                |
| <b>seq1704</b> | Firmicutes    | Clostridia   |              |                |
| <b>seq1712</b> | Firmicutes    | Clostridia   |              |                |
| <b>seq1717</b> | Firmicutes    | Clostridia   |              |                |
| <b>seq1722</b> | Firmicutes    | Clostridia   |              |                |
| <b>seq1724</b> | Firmicutes    | Clostridia   |              |                |
| <b>seq1729</b> | Firmicutes    | Clostridia   |              |                |
| <b>seq1730</b> | Firmicutes    | Clostridia   |              |                |
| <b>seq1737</b> | Firmicutes    | Clostridia   |              |                |
| <b>seq1740</b> | Firmicutes    | Clostridia   |              |                |
| <b>seq1743</b> | Firmicutes    | Clostridia   |              |                |
| <b>seq1746</b> | Firmicutes    | Clostridia   |              |                |
| <b>seq1747</b> | Firmicutes    | Clostridia   |              |                |
| <b>seq1758</b> | Firmicutes    | Clostridia   |              |                |
| <b>seq1760</b> | Firmicutes    | Clostridia   |              |                |
| <b>seq1763</b> | Firmicutes    | Clostridia   |              |                |
| <b>seq1767</b> | Firmicutes    | Clostridia   |              |                |
| <b>seq1770</b> | Firmicutes    | Clostridia   |              |                |

Sequence Count Table

|                | <b>Phylum</b> | <b>Class</b> | <b>Subject34WK0</b> | <b>Subject34WK12</b> | <b>Subject16WK0</b> | <b>Subject16WK12</b> |
|----------------|---------------|--------------|---------------------|----------------------|---------------------|----------------------|
| <b>seq1633</b> | Firmicutes    | Clostridia   | 0                   | 0                    | 0                   | 0                    |
| <b>seq1639</b> | Firmicutes    | Clostridia   | 0                   | 0                    | 0                   | 0                    |
| <b>seq1641</b> | Firmicutes    | Clostridia   | 0                   | 0                    | 0                   | 0                    |
| <b>seq1648</b> | Firmicutes    | Clostridia   | 0                   | 0                    | 0                   | 0                    |
| <b>seq1651</b> | Firmicutes    | Clostridia   | 0                   | 0                    | 0                   | 0                    |
| <b>seq1657</b> | Firmicutes    | Clostridia   | 0                   | 0                    | 0                   | 15                   |
| <b>seq1659</b> | Firmicutes    | Clostridia   | 0                   | 0                    | 0                   | 0                    |
| <b>seq1671</b> | Firmicutes    | Clostridia   | 0                   | 0                    | 0                   | 0                    |
| <b>seq1675</b> | Firmicutes    | Clostridia   | 0                   | 0                    | 0                   | 0                    |
| <b>seq1676</b> | Firmicutes    | Clostridia   | 0                   | 0                    | 0                   | 0                    |
| <b>seq1679</b> | Firmicutes    | Clostridia   | 0                   | 0                    | 0                   | 0                    |
| <b>seq1686</b> | Firmicutes    | Clostridia   | 0                   | 0                    | 0                   | 0                    |
| <b>seq1691</b> | Firmicutes    | Clostridia   | 0                   | 0                    | 0                   | 0                    |
| <b>seq1696</b> | Firmicutes    | Clostridia   | 0                   | 0                    | 0                   | 0                    |
| <b>seq1697</b> | Firmicutes    | Clostridia   | 0                   | 0                    | 0                   | 0                    |
| <b>seq1704</b> | Firmicutes    | Clostridia   | 0                   | 3                    | 0                   | 0                    |
| <b>seq1712</b> | Firmicutes    | Clostridia   | 0                   | 0                    | 0                   | 0                    |
| <b>seq1717</b> | Firmicutes    | Clostridia   | 0                   | 0                    | 0                   | 0                    |
| <b>seq1722</b> | Firmicutes    | Clostridia   | 0                   | 0                    | 0                   | 0                    |
| <b>seq1724</b> | Firmicutes    | Clostridia   | 0                   | 0                    | 0                   | 0                    |
| <b>seq1729</b> | Firmicutes    | Clostridia   | 0                   | 0                    | 0                   | 0                    |
| <b>seq1730</b> | Firmicutes    | Clostridia   | 0                   | 0                    | 0                   | 0                    |
| <b>seq1737</b> | Firmicutes    | Clostridia   | 0                   | 0                    | 0                   | 0                    |
| <b>seq1740</b> | Firmicutes    | Clostridia   | 0                   | 0                    | 0                   | 0                    |
| <b>seq1743</b> | Firmicutes    | Clostridia   | 0                   | 0                    | 0                   | 0                    |
| <b>seq1746</b> | Firmicutes    | Clostridia   | 0                   | 0                    | 0                   | 0                    |
| <b>seq1747</b> | Firmicutes    | Clostridia   | 0                   | 0                    | 0                   | 0                    |
| <b>seq1758</b> | Firmicutes    | Clostridia   | 0                   | 0                    | 0                   | 0                    |
| <b>seq1760</b> | Firmicutes    | Clostridia   | 0                   | 0                    | 0                   | 0                    |
| <b>seq1763</b> | Firmicutes    | Clostridia   | 0                   | 0                    | 0                   | 0                    |
| <b>seq1767</b> | Firmicutes    | Clostridia   | 0                   | 0                    | 0                   | 0                    |
| <b>seq1770</b> | Firmicutes    | Clostridia   | 0                   | 0                    | 0                   | 0                    |

Sequence Count Table

|                | <b>Phylum</b> | <b>Class</b> | <b>Subject17WK0</b> | <b>Subject17WK12</b> | <b>Subject1WK0</b> | <b>Subject1WK12</b> |
|----------------|---------------|--------------|---------------------|----------------------|--------------------|---------------------|
| <b>seq1633</b> | Firmicutes    | Clostridia   | 0                   | 0                    | 0                  | 0                   |
| <b>seq1639</b> | Firmicutes    | Clostridia   | 0                   | 0                    | 0                  | 0                   |
| <b>seq1641</b> | Firmicutes    | Clostridia   | 0                   | 0                    | 8                  | 8                   |
| <b>seq1648</b> | Firmicutes    | Clostridia   | 0                   | 0                    | 0                  | 0                   |
| <b>seq1651</b> | Firmicutes    | Clostridia   | 0                   | 0                    | 0                  | 0                   |
| <b>seq1657</b> | Firmicutes    | Clostridia   | 0                   | 0                    | 0                  | 0                   |
| <b>seq1659</b> | Firmicutes    | Clostridia   | 0                   | 0                    | 0                  | 0                   |
| <b>seq1671</b> | Firmicutes    | Clostridia   | 14                  | 0                    | 0                  | 0                   |
| <b>seq1675</b> | Firmicutes    | Clostridia   | 0                   | 0                    | 0                  | 0                   |
| <b>seq1676</b> | Firmicutes    | Clostridia   | 0                   | 0                    | 0                  | 0                   |
| <b>seq1679</b> | Firmicutes    | Clostridia   | 0                   | 0                    | 0                  | 0                   |
| <b>seq1686</b> | Firmicutes    | Clostridia   | 0                   | 0                    | 0                  | 0                   |
| <b>seq1691</b> | Firmicutes    | Clostridia   | 0                   | 0                    | 0                  | 0                   |
| <b>seq1696</b> | Firmicutes    | Clostridia   | 0                   | 0                    | 0                  | 0                   |
| <b>seq1697</b> | Firmicutes    | Clostridia   | 0                   | 0                    | 0                  | 0                   |
| <b>seq1704</b> | Firmicutes    | Clostridia   | 0                   | 0                    | 0                  | 0                   |
| <b>seq1712</b> | Firmicutes    | Clostridia   | 0                   | 0                    | 0                  | 0                   |
| <b>seq1717</b> | Firmicutes    | Clostridia   | 0                   | 0                    | 0                  | 0                   |
| <b>seq1722</b> | Firmicutes    | Clostridia   | 11                  | 0                    | 0                  | 0                   |
| <b>seq1724</b> | Firmicutes    | Clostridia   | 0                   | 0                    | 0                  | 0                   |
| <b>seq1729</b> | Firmicutes    | Clostridia   | 0                   | 0                    | 0                  | 0                   |
| <b>seq1730</b> | Firmicutes    | Clostridia   | 0                   | 0                    | 0                  | 0                   |
| <b>seq1737</b> | Firmicutes    | Clostridia   | 0                   | 0                    | 0                  | 0                   |
| <b>seq1740</b> | Firmicutes    | Clostridia   | 7                   | 0                    | 0                  | 0                   |
| <b>seq1743</b> | Firmicutes    | Clostridia   | 0                   | 0                    | 0                  | 5                   |
| <b>seq1746</b> | Firmicutes    | Clostridia   | 0                   | 0                    | 0                  | 0                   |
| <b>seq1747</b> | Firmicutes    | Clostridia   | 0                   | 0                    | 0                  | 0                   |
| <b>seq1758</b> | Firmicutes    | Clostridia   | 0                   | 0                    | 0                  | 0                   |
| <b>seq1760</b> | Firmicutes    | Clostridia   | 0                   | 0                    | 0                  | 0                   |
| <b>seq1763</b> | Firmicutes    | Clostridia   | 9                   | 0                    | 0                  | 0                   |
| <b>seq1767</b> | Firmicutes    | Clostridia   | 0                   | 0                    | 0                  | 0                   |
| <b>seq1770</b> | Firmicutes    | Clostridia   | 0                   | 0                    | 0                  | 0                   |

Sequence Count Table

|                | <b>Phylum</b> | <b>Class</b> | <b>Subject2WK0</b> | <b>Subject2WK12</b> | <b>Subject3WK0</b> | <b>Subject3WK12</b> |
|----------------|---------------|--------------|--------------------|---------------------|--------------------|---------------------|
| <b>seq1633</b> | Firmicutes    | Clostridia   | 0                  | 0                   | 0                  | 0                   |
| <b>seq1639</b> | Firmicutes    | Clostridia   | 0                  | 0                   | 0                  | 0                   |
| <b>seq1641</b> | Firmicutes    | Clostridia   | 0                  | 0                   | 0                  | 0                   |
| <b>seq1648</b> | Firmicutes    | Clostridia   | 0                  | 0                   | 0                  | 0                   |
| <b>seq1651</b> | Firmicutes    | Clostridia   | 0                  | 0                   | 0                  | 0                   |
| <b>seq1657</b> | Firmicutes    | Clostridia   | 0                  | 0                   | 0                  | 0                   |
| <b>seq1659</b> | Firmicutes    | Clostridia   | 0                  | 0                   | 0                  | 0                   |
| <b>seq1671</b> | Firmicutes    | Clostridia   | 0                  | 0                   | 0                  | 0                   |
| <b>seq1675</b> | Firmicutes    | Clostridia   | 0                  | 0                   | 0                  | 0                   |
| <b>seq1676</b> | Firmicutes    | Clostridia   | 0                  | 0                   | 0                  | 0                   |
| <b>seq1679</b> | Firmicutes    | Clostridia   | 0                  | 0                   | 0                  | 0                   |
| <b>seq1686</b> | Firmicutes    | Clostridia   | 0                  | 0                   | 0                  | 0                   |
| <b>seq1691</b> | Firmicutes    | Clostridia   | 0                  | 0                   | 0                  | 0                   |
| <b>seq1696</b> | Firmicutes    | Clostridia   | 0                  | 0                   | 0                  | 0                   |
| <b>seq1697</b> | Firmicutes    | Clostridia   | 0                  | 0                   | 0                  | 0                   |
| <b>seq1704</b> | Firmicutes    | Clostridia   | 0                  | 0                   | 0                  | 0                   |
| <b>seq1712</b> | Firmicutes    | Clostridia   | 0                  | 0                   | 0                  | 0                   |
| <b>seq1717</b> | Firmicutes    | Clostridia   | 0                  | 0                   | 0                  | 0                   |
| <b>seq1722</b> | Firmicutes    | Clostridia   | 0                  | 0                   | 0                  | 0                   |
| <b>seq1724</b> | Firmicutes    | Clostridia   | 0                  | 0                   | 0                  | 0                   |
| <b>seq1729</b> | Firmicutes    | Clostridia   | 0                  | 0                   | 0                  | 0                   |
| <b>seq1730</b> | Firmicutes    | Clostridia   | 0                  | 0                   | 0                  | 0                   |
| <b>seq1737</b> | Firmicutes    | Clostridia   | 0                  | 0                   | 0                  | 0                   |
| <b>seq1740</b> | Firmicutes    | Clostridia   | 0                  | 0                   | 0                  | 0                   |
| <b>seq1743</b> | Firmicutes    | Clostridia   | 0                  | 0                   | 0                  | 0                   |
| <b>seq1746</b> | Firmicutes    | Clostridia   | 0                  | 0                   | 0                  | 0                   |
| <b>seq1747</b> | Firmicutes    | Clostridia   | 0                  | 0                   | 0                  | 0                   |
| <b>seq1758</b> | Firmicutes    | Clostridia   | 0                  | 0                   | 0                  | 0                   |
| <b>seq1760</b> | Firmicutes    | Clostridia   | 0                  | 0                   | 0                  | 0                   |
| <b>seq1763</b> | Firmicutes    | Clostridia   | 0                  | 0                   | 0                  | 0                   |
| <b>seq1767</b> | Firmicutes    | Clostridia   | 0                  | 0                   | 0                  | 0                   |
| <b>seq1770</b> | Firmicutes    | Clostridia   | 0                  | 0                   | 0                  | 0                   |

Sequence Count Table

|                | <b>Phylum</b> | <b>Class</b> | <b>Subject4WK0</b> | <b>Subject4WK12</b> | <b>Subject5WK0</b> | <b>Subject5WK12</b> |
|----------------|---------------|--------------|--------------------|---------------------|--------------------|---------------------|
| <b>seq1633</b> | Firmicutes    | Clostridia   | 0                  | 0                   | 0                  | 0                   |
| <b>seq1639</b> | Firmicutes    | Clostridia   | 0                  | 0                   | 0                  | 0                   |
| <b>seq1641</b> | Firmicutes    | Clostridia   | 0                  | 0                   | 0                  | 0                   |
| <b>seq1648</b> | Firmicutes    | Clostridia   | 0                  | 0                   | 0                  | 0                   |
| <b>seq1651</b> | Firmicutes    | Clostridia   | 0                  | 0                   | 0                  | 0                   |
| <b>seq1657</b> | Firmicutes    | Clostridia   | 0                  | 0                   | 0                  | 0                   |
| <b>seq1659</b> | Firmicutes    | Clostridia   | 0                  | 0                   | 0                  | 0                   |
| <b>seq1671</b> | Firmicutes    | Clostridia   | 0                  | 0                   | 0                  | 0                   |
| <b>seq1675</b> | Firmicutes    | Clostridia   | 0                  | 0                   | 0                  | 0                   |
| <b>seq1676</b> | Firmicutes    | Clostridia   | 0                  | 0                   | 0                  | 0                   |
| <b>seq1679</b> | Firmicutes    | Clostridia   | 0                  | 0                   | 0                  | 0                   |
| <b>seq1686</b> | Firmicutes    | Clostridia   | 0                  | 0                   | 0                  | 0                   |
| <b>seq1691</b> | Firmicutes    | Clostridia   | 0                  | 0                   | 0                  | 13                  |
| <b>seq1696</b> | Firmicutes    | Clostridia   | 0                  | 0                   | 0                  | 0                   |
| <b>seq1697</b> | Firmicutes    | Clostridia   | 0                  | 0                   | 0                  | 0                   |
| <b>seq1704</b> | Firmicutes    | Clostridia   | 0                  | 0                   | 0                  | 0                   |
| <b>seq1712</b> | Firmicutes    | Clostridia   | 0                  | 0                   | 0                  | 0                   |
| <b>seq1717</b> | Firmicutes    | Clostridia   | 0                  | 0                   | 0                  | 0                   |
| <b>seq1722</b> | Firmicutes    | Clostridia   | 0                  | 0                   | 0                  | 0                   |
| <b>seq1724</b> | Firmicutes    | Clostridia   | 0                  | 11                  | 0                  | 0                   |
| <b>seq1729</b> | Firmicutes    | Clostridia   | 0                  | 0                   | 0                  | 0                   |
| <b>seq1730</b> | Firmicutes    | Clostridia   | 0                  | 0                   | 0                  | 0                   |
| <b>seq1737</b> | Firmicutes    | Clostridia   | 0                  | 0                   | 0                  | 0                   |
| <b>seq1740</b> | Firmicutes    | Clostridia   | 0                  | 0                   | 0                  | 0                   |
| <b>seq1743</b> | Firmicutes    | Clostridia   | 0                  | 0                   | 0                  | 5                   |
| <b>seq1746</b> | Firmicutes    | Clostridia   | 0                  | 0                   | 0                  | 0                   |
| <b>seq1747</b> | Firmicutes    | Clostridia   | 0                  | 0                   | 0                  | 0                   |
| <b>seq1758</b> | Firmicutes    | Clostridia   | 0                  | 0                   | 0                  | 0                   |
| <b>seq1760</b> | Firmicutes    | Clostridia   | 0                  | 0                   | 0                  | 0                   |
| <b>seq1763</b> | Firmicutes    | Clostridia   | 0                  | 0                   | 0                  | 0                   |
| <b>seq1767</b> | Firmicutes    | Clostridia   | 0                  | 0                   | 0                  | 0                   |
| <b>seq1770</b> | Firmicutes    | Clostridia   | 0                  | 0                   | 0                  | 0                   |



Sequence Count Table

|                | <b>Phylum</b> | <b>Class</b> | <b>Subject6WK0</b> | <b>Subject6WK12</b> | <b>Subject18WK0</b> | <b>Subject18WK12</b> |
|----------------|---------------|--------------|--------------------|---------------------|---------------------|----------------------|
| <b>seq1633</b> | Firmicutes    | Clostridia   | 0                  | 0                   | 0                   | 0                    |
| <b>seq1639</b> | Firmicutes    | Clostridia   | 0                  | 0                   | 0                   | 0                    |
| <b>seq1641</b> | Firmicutes    | Clostridia   | 0                  | 0                   | 0                   | 0                    |
| <b>seq1648</b> | Firmicutes    | Clostridia   | 0                  | 0                   | 0                   | 0                    |
| <b>seq1651</b> | Firmicutes    | Clostridia   | 0                  | 0                   | 0                   | 0                    |
| <b>seq1657</b> | Firmicutes    | Clostridia   | 0                  | 0                   | 0                   | 0                    |
| <b>seq1659</b> | Firmicutes    | Clostridia   | 15                 | 0                   | 0                   | 0                    |
| <b>seq1671</b> | Firmicutes    | Clostridia   | 0                  | 0                   | 0                   | 0                    |
| <b>seq1675</b> | Firmicutes    | Clostridia   | 0                  | 0                   | 0                   | 0                    |
| <b>seq1676</b> | Firmicutes    | Clostridia   | 0                  | 0                   | 0                   | 0                    |
| <b>seq1679</b> | Firmicutes    | Clostridia   | 0                  | 0                   | 0                   | 0                    |
| <b>seq1686</b> | Firmicutes    | Clostridia   | 0                  | 0                   | 0                   | 0                    |
| <b>seq1691</b> | Firmicutes    | Clostridia   | 0                  | 0                   | 0                   | 0                    |
| <b>seq1696</b> | Firmicutes    | Clostridia   | 0                  | 0                   | 0                   | 0                    |
| <b>seq1697</b> | Firmicutes    | Clostridia   | 0                  | 0                   | 0                   | 0                    |
| <b>seq1704</b> | Firmicutes    | Clostridia   | 0                  | 2                   | 0                   | 0                    |
| <b>seq1712</b> | Firmicutes    | Clostridia   | 0                  | 0                   | 0                   | 0                    |
| <b>seq1717</b> | Firmicutes    | Clostridia   | 0                  | 0                   | 0                   | 0                    |
| <b>seq1722</b> | Firmicutes    | Clostridia   | 0                  | 0                   | 0                   | 0                    |
| <b>seq1724</b> | Firmicutes    | Clostridia   | 0                  | 0                   | 0                   | 0                    |
| <b>seq1729</b> | Firmicutes    | Clostridia   | 0                  | 0                   | 0                   | 0                    |
| <b>seq1730</b> | Firmicutes    | Clostridia   | 0                  | 0                   | 0                   | 0                    |
| <b>seq1737</b> | Firmicutes    | Clostridia   | 0                  | 0                   | 0                   | 0                    |
| <b>seq1740</b> | Firmicutes    | Clostridia   | 0                  | 0                   | 0                   | 0                    |
| <b>seq1743</b> | Firmicutes    | Clostridia   | 0                  | 0                   | 0                   | 0                    |
| <b>seq1746</b> | Firmicutes    | Clostridia   | 10                 | 0                   | 0                   | 0                    |
| <b>seq1747</b> | Firmicutes    | Clostridia   | 10                 | 0                   | 0                   | 0                    |
| <b>seq1758</b> | Firmicutes    | Clostridia   | 0                  | 0                   | 0                   | 0                    |
| <b>seq1760</b> | Firmicutes    | Clostridia   | 0                  | 0                   | 0                   | 0                    |
| <b>seq1763</b> | Firmicutes    | Clostridia   | 0                  | 0                   | 0                   | 0                    |
| <b>seq1767</b> | Firmicutes    | Clostridia   | 0                  | 9                   | 0                   | 0                    |
| <b>seq1770</b> | Firmicutes    | Clostridia   | 0                  | 0                   | 0                   | 0                    |

Sequence Count Table

|                | <b>Phylum</b> | <b>Class</b> | <b>Subject19WK0</b> | <b>Subject19WK12</b> | <b>Subject20WK0</b> | <b>Subject20WK12</b> |
|----------------|---------------|--------------|---------------------|----------------------|---------------------|----------------------|
| <b>seq1633</b> | Firmicutes    | Clostridia   | 0                   | 0                    | 17                  | 0                    |
| <b>seq1639</b> | Firmicutes    | Clostridia   | 0                   | 0                    | 0                   | 0                    |
| <b>seq1641</b> | Firmicutes    | Clostridia   | 0                   | 0                    | 0                   | 0                    |
| <b>seq1648</b> | Firmicutes    | Clostridia   | 0                   | 0                    | 0                   | 0                    |
| <b>seq1651</b> | Firmicutes    | Clostridia   | 0                   | 0                    | 0                   | 0                    |
| <b>seq1657</b> | Firmicutes    | Clostridia   | 0                   | 0                    | 0                   | 0                    |
| <b>seq1659</b> | Firmicutes    | Clostridia   | 0                   | 0                    | 0                   | 0                    |
| <b>seq1671</b> | Firmicutes    | Clostridia   | 0                   | 0                    | 0                   | 0                    |
| <b>seq1675</b> | Firmicutes    | Clostridia   | 0                   | 0                    | 14                  | 0                    |
| <b>seq1676</b> | Firmicutes    | Clostridia   | 0                   | 0                    | 4                   | 10                   |
| <b>seq1679</b> | Firmicutes    | Clostridia   | 0                   | 0                    | 0                   | 0                    |
| <b>seq1686</b> | Firmicutes    | Clostridia   | 0                   | 0                    | 0                   | 0                    |
| <b>seq1691</b> | Firmicutes    | Clostridia   | 0                   | 0                    | 0                   | 0                    |
| <b>seq1696</b> | Firmicutes    | Clostridia   | 0                   | 0                    | 0                   | 0                    |
| <b>seq1697</b> | Firmicutes    | Clostridia   | 0                   | 0                    | 0                   | 0                    |
| <b>seq1704</b> | Firmicutes    | Clostridia   | 0                   | 0                    | 0                   | 0                    |
| <b>seq1712</b> | Firmicutes    | Clostridia   | 0                   | 0                    | 12                  | 0                    |
| <b>seq1717</b> | Firmicutes    | Clostridia   | 0                   | 0                    | 0                   | 0                    |
| <b>seq1722</b> | Firmicutes    | Clostridia   | 0                   | 0                    | 0                   | 0                    |
| <b>seq1724</b> | Firmicutes    | Clostridia   | 0                   | 0                    | 0                   | 0                    |
| <b>seq1729</b> | Firmicutes    | Clostridia   | 0                   | 0                    | 0                   | 0                    |
| <b>seq1730</b> | Firmicutes    | Clostridia   | 0                   | 0                    | 0                   | 0                    |
| <b>seq1737</b> | Firmicutes    | Clostridia   | 0                   | 0                    | 0                   | 0                    |
| <b>seq1740</b> | Firmicutes    | Clostridia   | 0                   | 0                    | 0                   | 0                    |
| <b>seq1743</b> | Firmicutes    | Clostridia   | 0                   | 0                    | 0                   | 0                    |
| <b>seq1746</b> | Firmicutes    | Clostridia   | 0                   | 0                    | 0                   | 0                    |
| <b>seq1747</b> | Firmicutes    | Clostridia   | 0                   | 0                    | 0                   | 0                    |
| <b>seq1758</b> | Firmicutes    | Clostridia   | 0                   | 0                    | 0                   | 0                    |
| <b>seq1760</b> | Firmicutes    | Clostridia   | 0                   | 0                    | 0                   | 0                    |
| <b>seq1763</b> | Firmicutes    | Clostridia   | 0                   | 0                    | 0                   | 0                    |
| <b>seq1767</b> | Firmicutes    | Clostridia   | 0                   | 0                    | 0                   | 0                    |
| <b>seq1770</b> | Firmicutes    | Clostridia   | 0                   | 0                    | 0                   | 0                    |

Sequence Count Table

|                | <b>Phylum</b> | <b>Class</b> | <b>Subject7WK0</b> | <b>Subject7WK12</b> | <b>Subject21WK0</b> | <b>Subject21WK12</b> |
|----------------|---------------|--------------|--------------------|---------------------|---------------------|----------------------|
| <b>seq1633</b> | Firmicutes    | Clostridia   | 0                  | 0                   | 0                   | 0                    |
| <b>seq1639</b> | Firmicutes    | Clostridia   | 0                  | 0                   | 0                   | 0                    |
| <b>seq1641</b> | Firmicutes    | Clostridia   | 0                  | 0                   | 0                   | 0                    |
| <b>seq1648</b> | Firmicutes    | Clostridia   | 0                  | 0                   | 0                   | 0                    |
| <b>seq1651</b> | Firmicutes    | Clostridia   | 0                  | 0                   | 0                   | 0                    |
| <b>seq1657</b> | Firmicutes    | Clostridia   | 0                  | 0                   | 0                   | 0                    |
| <b>seq1659</b> | Firmicutes    | Clostridia   | 0                  | 0                   | 0                   | 0                    |
| <b>seq1671</b> | Firmicutes    | Clostridia   | 0                  | 0                   | 0                   | 0                    |
| <b>seq1675</b> | Firmicutes    | Clostridia   | 0                  | 0                   | 0                   | 0                    |
| <b>seq1676</b> | Firmicutes    | Clostridia   | 0                  | 0                   | 0                   | 0                    |
| <b>seq1679</b> | Firmicutes    | Clostridia   | 0                  | 0                   | 0                   | 0                    |
| <b>seq1686</b> | Firmicutes    | Clostridia   | 0                  | 0                   | 0                   | 0                    |
| <b>seq1691</b> | Firmicutes    | Clostridia   | 0                  | 0                   | 0                   | 0                    |
| <b>seq1696</b> | Firmicutes    | Clostridia   | 0                  | 0                   | 0                   | 0                    |
| <b>seq1697</b> | Firmicutes    | Clostridia   | 0                  | 0                   | 0                   | 0                    |
| <b>seq1704</b> | Firmicutes    | Clostridia   | 0                  | 0                   | 0                   | 0                    |
| <b>seq1712</b> | Firmicutes    | Clostridia   | 0                  | 0                   | 0                   | 0                    |
| <b>seq1717</b> | Firmicutes    | Clostridia   | 0                  | 0                   | 0                   | 0                    |
| <b>seq1722</b> | Firmicutes    | Clostridia   | 0                  | 0                   | 0                   | 0                    |
| <b>seq1724</b> | Firmicutes    | Clostridia   | 0                  | 0                   | 0                   | 0                    |
| <b>seq1729</b> | Firmicutes    | Clostridia   | 0                  | 0                   | 0                   | 0                    |
| <b>seq1730</b> | Firmicutes    | Clostridia   | 0                  | 0                   | 0                   | 0                    |
| <b>seq1737</b> | Firmicutes    | Clostridia   | 0                  | 0                   | 0                   | 0                    |
| <b>seq1740</b> | Firmicutes    | Clostridia   | 0                  | 0                   | 0                   | 0                    |
| <b>seq1743</b> | Firmicutes    | Clostridia   | 0                  | 0                   | 0                   | 0                    |
| <b>seq1746</b> | Firmicutes    | Clostridia   | 0                  | 0                   | 0                   | 0                    |
| <b>seq1747</b> | Firmicutes    | Clostridia   | 0                  | 0                   | 0                   | 0                    |
| <b>seq1758</b> | Firmicutes    | Clostridia   | 0                  | 0                   | 0                   | 0                    |
| <b>seq1760</b> | Firmicutes    | Clostridia   | 0                  | 0                   | 0                   | 0                    |
| <b>seq1763</b> | Firmicutes    | Clostridia   | 0                  | 0                   | 0                   | 0                    |
| <b>seq1767</b> | Firmicutes    | Clostridia   | 0                  | 0                   | 0                   | 0                    |
| <b>seq1770</b> | Firmicutes    | Clostridia   | 9                  | 0                   | 0                   | 0                    |

Sequence Count Table

|                | <b>Phylum</b> | <b>Class</b> | <b>Subject8WK0</b> | <b>Subject8WK12</b> | <b>Subject9WK0</b> | <b>Subject9WK12</b> |
|----------------|---------------|--------------|--------------------|---------------------|--------------------|---------------------|
| <b>seq1633</b> | Firmicutes    | Clostridia   | 0                  | 0                   | 0                  | 0                   |
| <b>seq1639</b> | Firmicutes    | Clostridia   | 0                  | 0                   | 0                  | 0                   |
| <b>seq1641</b> | Firmicutes    | Clostridia   | 0                  | 0                   | 0                  | 0                   |
| <b>seq1648</b> | Firmicutes    | Clostridia   | 0                  | 0                   | 0                  | 0                   |
| <b>seq1651</b> | Firmicutes    | Clostridia   | 0                  | 0                   | 0                  | 0                   |
| <b>seq1657</b> | Firmicutes    | Clostridia   | 0                  | 0                   | 0                  | 0                   |
| <b>seq1659</b> | Firmicutes    | Clostridia   | 0                  | 0                   | 0                  | 0                   |
| <b>seq1671</b> | Firmicutes    | Clostridia   | 0                  | 0                   | 0                  | 0                   |
| <b>seq1675</b> | Firmicutes    | Clostridia   | 0                  | 0                   | 0                  | 0                   |
| <b>seq1676</b> | Firmicutes    | Clostridia   | 0                  | 0                   | 0                  | 0                   |
| <b>seq1679</b> | Firmicutes    | Clostridia   | 0                  | 0                   | 0                  | 0                   |
| <b>seq1686</b> | Firmicutes    | Clostridia   | 0                  | 0                   | 0                  | 0                   |
| <b>seq1691</b> | Firmicutes    | Clostridia   | 0                  | 0                   | 0                  | 0                   |
| <b>seq1696</b> | Firmicutes    | Clostridia   | 0                  | 0                   | 0                  | 0                   |
| <b>seq1697</b> | Firmicutes    | Clostridia   | 0                  | 0                   | 0                  | 0                   |
| <b>seq1704</b> | Firmicutes    | Clostridia   | 0                  | 0                   | 0                  | 0                   |
| <b>seq1712</b> | Firmicutes    | Clostridia   | 0                  | 0                   | 0                  | 0                   |
| <b>seq1717</b> | Firmicutes    | Clostridia   | 0                  | 0                   | 0                  | 0                   |
| <b>seq1722</b> | Firmicutes    | Clostridia   | 0                  | 0                   | 0                  | 0                   |
| <b>seq1724</b> | Firmicutes    | Clostridia   | 0                  | 0                   | 0                  | 0                   |
| <b>seq1729</b> | Firmicutes    | Clostridia   | 0                  | 0                   | 0                  | 0                   |
| <b>seq1730</b> | Firmicutes    | Clostridia   | 0                  | 0                   | 0                  | 0                   |
| <b>seq1737</b> | Firmicutes    | Clostridia   | 0                  | 0                   | 0                  | 0                   |
| <b>seq1740</b> | Firmicutes    | Clostridia   | 0                  | 0                   | 0                  | 0                   |
| <b>seq1743</b> | Firmicutes    | Clostridia   | 0                  | 0                   | 0                  | 0                   |
| <b>seq1746</b> | Firmicutes    | Clostridia   | 0                  | 0                   | 0                  | 0                   |
| <b>seq1747</b> | Firmicutes    | Clostridia   | 0                  | 0                   | 0                  | 0                   |
| <b>seq1758</b> | Firmicutes    | Clostridia   | 0                  | 0                   | 0                  | 0                   |
| <b>seq1760</b> | Firmicutes    | Clostridia   | 0                  | 0                   | 0                  | 0                   |
| <b>seq1763</b> | Firmicutes    | Clostridia   | 0                  | 0                   | 0                  | 0                   |
| <b>seq1767</b> | Firmicutes    | Clostridia   | 0                  | 0                   | 0                  | 0                   |
| <b>seq1770</b> | Firmicutes    | Clostridia   | 0                  | 0                   | 0                  | 0                   |

Sequence Count Table

|                | <b>Phylum</b> | <b>Class</b> | <b>Subject10WK0</b> | <b>Subject10WK12</b> | <b>Subject22WK0</b> | <b>Subject22WK12</b> |
|----------------|---------------|--------------|---------------------|----------------------|---------------------|----------------------|
| <b>seq1633</b> | Firmicutes    | Clostridia   | 0                   | 0                    | 0                   | 0                    |
| <b>seq1639</b> | Firmicutes    | Clostridia   | 0                   | 0                    | 0                   | 0                    |
| <b>seq1641</b> | Firmicutes    | Clostridia   | 0                   | 0                    | 0                   | 0                    |
| <b>seq1648</b> | Firmicutes    | Clostridia   | 0                   | 0                    | 0                   | 16                   |
| <b>seq1651</b> | Firmicutes    | Clostridia   | 0                   | 0                    | 0                   | 0                    |
| <b>seq1657</b> | Firmicutes    | Clostridia   | 0                   | 0                    | 0                   | 0                    |
| <b>seq1659</b> | Firmicutes    | Clostridia   | 0                   | 0                    | 0                   | 0                    |
| <b>seq1671</b> | Firmicutes    | Clostridia   | 0                   | 0                    | 0                   | 0                    |
| <b>seq1675</b> | Firmicutes    | Clostridia   | 0                   | 0                    | 0                   | 0                    |
| <b>seq1676</b> | Firmicutes    | Clostridia   | 0                   | 0                    | 0                   | 0                    |
| <b>seq1679</b> | Firmicutes    | Clostridia   | 0                   | 0                    | 0                   | 14                   |
| <b>seq1686</b> | Firmicutes    | Clostridia   | 0                   | 0                    | 0                   | 0                    |
| <b>seq1691</b> | Firmicutes    | Clostridia   | 0                   | 0                    | 0                   | 0                    |
| <b>seq1696</b> | Firmicutes    | Clostridia   | 0                   | 0                    | 5                   | 8                    |
| <b>seq1697</b> | Firmicutes    | Clostridia   | 0                   | 0                    | 0                   | 13                   |
| <b>seq1704</b> | Firmicutes    | Clostridia   | 0                   | 0                    | 0                   | 0                    |
| <b>seq1712</b> | Firmicutes    | Clostridia   | 0                   | 0                    | 0                   | 0                    |
| <b>seq1717</b> | Firmicutes    | Clostridia   | 0                   | 0                    | 0                   | 0                    |
| <b>seq1722</b> | Firmicutes    | Clostridia   | 0                   | 0                    | 0                   | 0                    |
| <b>seq1724</b> | Firmicutes    | Clostridia   | 0                   | 0                    | 0                   | 0                    |
| <b>seq1729</b> | Firmicutes    | Clostridia   | 0                   | 0                    | 11                  | 0                    |
| <b>seq1730</b> | Firmicutes    | Clostridia   | 0                   | 0                    | 0                   | 0                    |
| <b>seq1737</b> | Firmicutes    | Clostridia   | 0                   | 0                    | 0                   | 0                    |
| <b>seq1740</b> | Firmicutes    | Clostridia   | 0                   | 0                    | 0                   | 0                    |
| <b>seq1743</b> | Firmicutes    | Clostridia   | 0                   | 0                    | 0                   | 0                    |
| <b>seq1746</b> | Firmicutes    | Clostridia   | 0                   | 0                    | 0                   | 0                    |
| <b>seq1747</b> | Firmicutes    | Clostridia   | 0                   | 0                    | 0                   | 0                    |
| <b>seq1758</b> | Firmicutes    | Clostridia   | 0                   | 0                    | 0                   | 0                    |
| <b>seq1760</b> | Firmicutes    | Clostridia   | 0                   | 0                    | 0                   | 0                    |
| <b>seq1763</b> | Firmicutes    | Clostridia   | 0                   | 0                    | 0                   | 0                    |
| <b>seq1767</b> | Firmicutes    | Clostridia   | 0                   | 0                    | 0                   | 0                    |
| <b>seq1770</b> | Firmicutes    | Clostridia   | 0                   | 0                    | 0                   | 0                    |

Sequence Count Table

|                | <b>Phylum</b> | <b>Class</b> | <b>Subject23WK0</b> | <b>Subject23WK12</b> | <b>Subject24WK0</b> | <b>Subject24WK12</b> |
|----------------|---------------|--------------|---------------------|----------------------|---------------------|----------------------|
| <b>seq1633</b> | Firmicutes    | Clostridia   | 0                   | 0                    | 0                   | 0                    |
| <b>seq1639</b> | Firmicutes    | Clostridia   | 0                   | 0                    | 0                   | 17                   |
| <b>seq1641</b> | Firmicutes    | Clostridia   | 0                   | 0                    | 0                   | 0                    |
| <b>seq1648</b> | Firmicutes    | Clostridia   | 0                   | 0                    | 0                   | 0                    |
| <b>seq1651</b> | Firmicutes    | Clostridia   | 0                   | 0                    | 0                   | 0                    |
| <b>seq1657</b> | Firmicutes    | Clostridia   | 0                   | 0                    | 0                   | 0                    |
| <b>seq1659</b> | Firmicutes    | Clostridia   | 0                   | 0                    | 0                   | 0                    |
| <b>seq1671</b> | Firmicutes    | Clostridia   | 0                   | 0                    | 0                   | 0                    |
| <b>seq1675</b> | Firmicutes    | Clostridia   | 0                   | 0                    | 0                   | 0                    |
| <b>seq1676</b> | Firmicutes    | Clostridia   | 0                   | 0                    | 0                   | 0                    |
| <b>seq1679</b> | Firmicutes    | Clostridia   | 0                   | 0                    | 0                   | 0                    |
| <b>seq1686</b> | Firmicutes    | Clostridia   | 0                   | 0                    | 0                   | 0                    |
| <b>seq1691</b> | Firmicutes    | Clostridia   | 0                   | 0                    | 0                   | 0                    |
| <b>seq1696</b> | Firmicutes    | Clostridia   | 0                   | 0                    | 0                   | 0                    |
| <b>seq1697</b> | Firmicutes    | Clostridia   | 0                   | 0                    | 0                   | 0                    |
| <b>seq1704</b> | Firmicutes    | Clostridia   | 0                   | 0                    | 0                   | 0                    |
| <b>seq1712</b> | Firmicutes    | Clostridia   | 0                   | 0                    | 0                   | 0                    |
| <b>seq1717</b> | Firmicutes    | Clostridia   | 0                   | 0                    | 0                   | 12                   |
| <b>seq1722</b> | Firmicutes    | Clostridia   | 0                   | 0                    | 0                   | 0                    |
| <b>seq1724</b> | Firmicutes    | Clostridia   | 0                   | 0                    | 0                   | 0                    |
| <b>seq1729</b> | Firmicutes    | Clostridia   | 0                   | 0                    | 0                   | 0                    |
| <b>seq1730</b> | Firmicutes    | Clostridia   | 0                   | 11                   | 0                   | 0                    |
| <b>seq1737</b> | Firmicutes    | Clostridia   | 0                   | 0                    | 0                   | 0                    |
| <b>seq1740</b> | Firmicutes    | Clostridia   | 0                   | 3                    | 0                   | 0                    |
| <b>seq1743</b> | Firmicutes    | Clostridia   | 0                   | 0                    | 0                   | 0                    |
| <b>seq1746</b> | Firmicutes    | Clostridia   | 0                   | 0                    | 0                   | 0                    |
| <b>seq1747</b> | Firmicutes    | Clostridia   | 0                   | 0                    | 0                   | 0                    |
| <b>seq1758</b> | Firmicutes    | Clostridia   | 0                   | 0                    | 0                   | 0                    |
| <b>seq1760</b> | Firmicutes    | Clostridia   | 0                   | 0                    | 0                   | 0                    |
| <b>seq1763</b> | Firmicutes    | Clostridia   | 0                   | 0                    | 0                   | 0                    |
| <b>seq1767</b> | Firmicutes    | Clostridia   | 0                   | 0                    | 0                   | 0                    |
| <b>seq1770</b> | Firmicutes    | Clostridia   | 0                   | 0                    | 0                   | 0                    |

Sequence Count Table

|                | <b>Phylum</b> | <b>Class</b> | <b>Subject11WK0</b> | <b>Subject11WK12</b> | <b>Subject12WK0</b> | <b>Subject12WK12</b> |
|----------------|---------------|--------------|---------------------|----------------------|---------------------|----------------------|
| <b>seq1633</b> | Firmicutes    | Clostridia   | 0                   | 0                    | 0                   | 0                    |
| <b>seq1639</b> | Firmicutes    | Clostridia   | 0                   | 0                    | 0                   | 0                    |
| <b>seq1641</b> | Firmicutes    | Clostridia   | 0                   | 0                    | 0                   | 0                    |
| <b>seq1648</b> | Firmicutes    | Clostridia   | 0                   | 0                    | 0                   | 0                    |
| <b>seq1651</b> | Firmicutes    | Clostridia   | 0                   | 0                    | 0                   | 0                    |
| <b>seq1657</b> | Firmicutes    | Clostridia   | 0                   | 0                    | 0                   | 0                    |
| <b>seq1659</b> | Firmicutes    | Clostridia   | 0                   | 0                    | 0                   | 0                    |
| <b>seq1671</b> | Firmicutes    | Clostridia   | 0                   | 0                    | 0                   | 0                    |
| <b>seq1675</b> | Firmicutes    | Clostridia   | 0                   | 0                    | 0                   | 0                    |
| <b>seq1676</b> | Firmicutes    | Clostridia   | 0                   | 0                    | 0                   | 0                    |
| <b>seq1679</b> | Firmicutes    | Clostridia   | 0                   | 0                    | 0                   | 0                    |
| <b>seq1686</b> | Firmicutes    | Clostridia   | 0                   | 0                    | 0                   | 0                    |
| <b>seq1691</b> | Firmicutes    | Clostridia   | 0                   | 0                    | 0                   | 0                    |
| <b>seq1696</b> | Firmicutes    | Clostridia   | 0                   | 0                    | 0                   | 0                    |
| <b>seq1697</b> | Firmicutes    | Clostridia   | 0                   | 0                    | 0                   | 0                    |
| <b>seq1704</b> | Firmicutes    | Clostridia   | 0                   | 0                    | 0                   | 0                    |
| <b>seq1712</b> | Firmicutes    | Clostridia   | 0                   | 0                    | 0                   | 0                    |
| <b>seq1717</b> | Firmicutes    | Clostridia   | 0                   | 0                    | 0                   | 0                    |
| <b>seq1722</b> | Firmicutes    | Clostridia   | 0                   | 0                    | 0                   | 0                    |
| <b>seq1724</b> | Firmicutes    | Clostridia   | 0                   | 0                    | 0                   | 0                    |
| <b>seq1729</b> | Firmicutes    | Clostridia   | 0                   | 0                    | 0                   | 0                    |
| <b>seq1730</b> | Firmicutes    | Clostridia   | 0                   | 0                    | 0                   | 0                    |
| <b>seq1737</b> | Firmicutes    | Clostridia   | 0                   | 0                    | 0                   | 0                    |
| <b>seq1740</b> | Firmicutes    | Clostridia   | 0                   | 0                    | 0                   | 0                    |
| <b>seq1743</b> | Firmicutes    | Clostridia   | 0                   | 0                    | 0                   | 0                    |
| <b>seq1746</b> | Firmicutes    | Clostridia   | 0                   | 0                    | 0                   | 0                    |
| <b>seq1747</b> | Firmicutes    | Clostridia   | 0                   | 0                    | 0                   | 0                    |
| <b>seq1758</b> | Firmicutes    | Clostridia   | 0                   | 0                    | 0                   | 0                    |
| <b>seq1760</b> | Firmicutes    | Clostridia   | 0                   | 0                    | 0                   | 0                    |
| <b>seq1763</b> | Firmicutes    | Clostridia   | 0                   | 0                    | 0                   | 0                    |
| <b>seq1767</b> | Firmicutes    | Clostridia   | 0                   | 0                    | 0                   | 0                    |
| <b>seq1770</b> | Firmicutes    | Clostridia   | 0                   | 0                    | 0                   | 0                    |

Sequence Count Table

|                | <b>Phylum</b> | <b>Class</b> | <b>Subject25WK0</b> | <b>Subject25WK12</b> | <b>Subject38WK0</b> | <b>Subject38WK12</b> |
|----------------|---------------|--------------|---------------------|----------------------|---------------------|----------------------|
| <b>seq1633</b> | Firmicutes    | Clostridia   | 0                   | 0                    | 0                   | 0                    |
| <b>seq1639</b> | Firmicutes    | Clostridia   | 0                   | 0                    | 0                   | 0                    |
| <b>seq1641</b> | Firmicutes    | Clostridia   | 0                   | 0                    | 0                   | 0                    |
| <b>seq1648</b> | Firmicutes    | Clostridia   | 0                   | 0                    | 0                   | 0                    |
| <b>seq1651</b> | Firmicutes    | Clostridia   | 0                   | 0                    | 0                   | 0                    |
| <b>seq1657</b> | Firmicutes    | Clostridia   | 0                   | 0                    | 0                   | 0                    |
| <b>seq1659</b> | Firmicutes    | Clostridia   | 0                   | 0                    | 0                   | 0                    |
| <b>seq1671</b> | Firmicutes    | Clostridia   | 0                   | 0                    | 0                   | 0                    |
| <b>seq1675</b> | Firmicutes    | Clostridia   | 0                   | 0                    | 0                   | 0                    |
| <b>seq1676</b> | Firmicutes    | Clostridia   | 0                   | 0                    | 0                   | 0                    |
| <b>seq1679</b> | Firmicutes    | Clostridia   | 0                   | 0                    | 0                   | 0                    |
| <b>seq1686</b> | Firmicutes    | Clostridia   | 0                   | 0                    | 0                   | 0                    |
| <b>seq1691</b> | Firmicutes    | Clostridia   | 0                   | 0                    | 0                   | 0                    |
| <b>seq1696</b> | Firmicutes    | Clostridia   | 0                   | 0                    | 0                   | 0                    |
| <b>seq1697</b> | Firmicutes    | Clostridia   | 0                   | 0                    | 0                   | 0                    |
| <b>seq1704</b> | Firmicutes    | Clostridia   | 0                   | 2                    | 0                   | 0                    |
| <b>seq1712</b> | Firmicutes    | Clostridia   | 0                   | 0                    | 0                   | 0                    |
| <b>seq1717</b> | Firmicutes    | Clostridia   | 0                   | 0                    | 0                   | 0                    |
| <b>seq1722</b> | Firmicutes    | Clostridia   | 0                   | 0                    | 0                   | 0                    |
| <b>seq1724</b> | Firmicutes    | Clostridia   | 0                   | 0                    | 0                   | 0                    |
| <b>seq1729</b> | Firmicutes    | Clostridia   | 0                   | 0                    | 0                   | 0                    |
| <b>seq1730</b> | Firmicutes    | Clostridia   | 0                   | 0                    | 0                   | 0                    |
| <b>seq1737</b> | Firmicutes    | Clostridia   | 0                   | 0                    | 0                   | 0                    |
| <b>seq1740</b> | Firmicutes    | Clostridia   | 0                   | 0                    | 0                   | 0                    |
| <b>seq1743</b> | Firmicutes    | Clostridia   | 0                   | 0                    | 0                   | 0                    |
| <b>seq1746</b> | Firmicutes    | Clostridia   | 0                   | 0                    | 0                   | 0                    |
| <b>seq1747</b> | Firmicutes    | Clostridia   | 0                   | 0                    | 0                   | 0                    |
| <b>seq1758</b> | Firmicutes    | Clostridia   | 10                  | 0                    | 0                   | 0                    |
| <b>seq1760</b> | Firmicutes    | Clostridia   | 0                   | 0                    | 0                   | 0                    |
| <b>seq1763</b> | Firmicutes    | Clostridia   | 0                   | 0                    | 0                   | 0                    |
| <b>seq1767</b> | Firmicutes    | Clostridia   | 0                   | 0                    | 0                   | 0                    |
| <b>seq1770</b> | Firmicutes    | Clostridia   | 0                   | 0                    | 0                   | 0                    |



Sequence Count Table

|                | <b>Phylum</b> | <b>Class</b> | <b>Subject31WK0</b> | <b>Subject31WK12</b> | <b>Subject32WK0</b> | <b>Subject32WK12</b> |
|----------------|---------------|--------------|---------------------|----------------------|---------------------|----------------------|
| <b>seq1633</b> | Firmicutes    | Clostridia   | 0                   | 0                    | 0                   | 0                    |
| <b>seq1639</b> | Firmicutes    | Clostridia   | 0                   | 0                    | 0                   | 0                    |
| <b>seq1641</b> | Firmicutes    | Clostridia   | 0                   | 0                    | 0                   | 0                    |
| <b>seq1648</b> | Firmicutes    | Clostridia   | 0                   | 0                    | 0                   | 0                    |
| <b>seq1651</b> | Firmicutes    | Clostridia   | 0                   | 0                    | 0                   | 0                    |
| <b>seq1657</b> | Firmicutes    | Clostridia   | 0                   | 0                    | 0                   | 0                    |
| <b>seq1659</b> | Firmicutes    | Clostridia   | 0                   | 0                    | 0                   | 0                    |
| <b>seq1671</b> | Firmicutes    | Clostridia   | 0                   | 0                    | 0                   | 0                    |
| <b>seq1675</b> | Firmicutes    | Clostridia   | 0                   | 0                    | 0                   | 0                    |
| <b>seq1676</b> | Firmicutes    | Clostridia   | 0                   | 0                    | 0                   | 0                    |
| <b>seq1679</b> | Firmicutes    | Clostridia   | 0                   | 0                    | 0                   | 0                    |
| <b>seq1686</b> | Firmicutes    | Clostridia   | 0                   | 0                    | 0                   | 0                    |
| <b>seq1691</b> | Firmicutes    | Clostridia   | 0                   | 0                    | 0                   | 0                    |
| <b>seq1696</b> | Firmicutes    | Clostridia   | 0                   | 0                    | 0                   | 0                    |
| <b>seq1697</b> | Firmicutes    | Clostridia   | 0                   | 0                    | 0                   | 0                    |
| <b>seq1704</b> | Firmicutes    | Clostridia   | 0                   | 0                    | 0                   | 0                    |
| <b>seq1712</b> | Firmicutes    | Clostridia   | 0                   | 0                    | 0                   | 0                    |
| <b>seq1717</b> | Firmicutes    | Clostridia   | 0                   | 0                    | 0                   | 0                    |
| <b>seq1722</b> | Firmicutes    | Clostridia   | 0                   | 0                    | 0                   | 0                    |
| <b>seq1724</b> | Firmicutes    | Clostridia   | 0                   | 0                    | 0                   | 0                    |
| <b>seq1729</b> | Firmicutes    | Clostridia   | 0                   | 0                    | 0                   | 0                    |
| <b>seq1730</b> | Firmicutes    | Clostridia   | 0                   | 0                    | 0                   | 0                    |
| <b>seq1737</b> | Firmicutes    | Clostridia   | 0                   | 0                    | 0                   | 0                    |
| <b>seq1740</b> | Firmicutes    | Clostridia   | 0                   | 0                    | 0                   | 0                    |
| <b>seq1743</b> | Firmicutes    | Clostridia   | 0                   | 0                    | 0                   | 0                    |
| <b>seq1746</b> | Firmicutes    | Clostridia   | 0                   | 0                    | 0                   | 0                    |
| <b>seq1747</b> | Firmicutes    | Clostridia   | 0                   | 0                    | 0                   | 0                    |
| <b>seq1758</b> | Firmicutes    | Clostridia   | 0                   | 0                    | 0                   | 0                    |
| <b>seq1760</b> | Firmicutes    | Clostridia   | 0                   | 0                    | 0                   | 0                    |
| <b>seq1763</b> | Firmicutes    | Clostridia   | 0                   | 0                    | 0                   | 0                    |
| <b>seq1767</b> | Firmicutes    | Clostridia   | 0                   | 0                    | 0                   | 0                    |
| <b>seq1770</b> | Firmicutes    | Clostridia   | 0                   | 0                    | 0                   | 0                    |

Sequence Count Table

|                | <b>Phylum</b> | <b>Class</b> | <b>Subject13WK0</b> | <b>Subject13WK12</b> | <b>Subject39WK0</b> | <b>Subject39WK12</b> |
|----------------|---------------|--------------|---------------------|----------------------|---------------------|----------------------|
| <b>seq1633</b> | Firmicutes    | Clostridia   | 0                   | 0                    | 0                   | 0                    |
| <b>seq1639</b> | Firmicutes    | Clostridia   | 0                   | 0                    | 0                   | 0                    |
| <b>seq1641</b> | Firmicutes    | Clostridia   | 0                   | 0                    | 0                   | 0                    |
| <b>seq1648</b> | Firmicutes    | Clostridia   | 0                   | 0                    | 0                   | 0                    |
| <b>seq1651</b> | Firmicutes    | Clostridia   | 16                  | 0                    | 0                   | 0                    |
| <b>seq1657</b> | Firmicutes    | Clostridia   | 0                   | 0                    | 0                   | 0                    |
| <b>seq1659</b> | Firmicutes    | Clostridia   | 0                   | 0                    | 0                   | 0                    |
| <b>seq1671</b> | Firmicutes    | Clostridia   | 0                   | 0                    | 0                   | 0                    |
| <b>seq1675</b> | Firmicutes    | Clostridia   | 0                   | 0                    | 0                   | 0                    |
| <b>seq1676</b> | Firmicutes    | Clostridia   | 0                   | 0                    | 0                   | 0                    |
| <b>seq1679</b> | Firmicutes    | Clostridia   | 0                   | 0                    | 0                   | 0                    |
| <b>seq1686</b> | Firmicutes    | Clostridia   | 0                   | 0                    | 0                   | 0                    |
| <b>seq1691</b> | Firmicutes    | Clostridia   | 0                   | 0                    | 0                   | 0                    |
| <b>seq1696</b> | Firmicutes    | Clostridia   | 0                   | 0                    | 0                   | 0                    |
| <b>seq1697</b> | Firmicutes    | Clostridia   | 0                   | 0                    | 0                   | 0                    |
| <b>seq1704</b> | Firmicutes    | Clostridia   | 0                   | 0                    | 0                   | 0                    |
| <b>seq1712</b> | Firmicutes    | Clostridia   | 0                   | 0                    | 0                   | 0                    |
| <b>seq1717</b> | Firmicutes    | Clostridia   | 0                   | 0                    | 0                   | 0                    |
| <b>seq1722</b> | Firmicutes    | Clostridia   | 0                   | 0                    | 0                   | 0                    |
| <b>seq1724</b> | Firmicutes    | Clostridia   | 0                   | 0                    | 0                   | 0                    |
| <b>seq1729</b> | Firmicutes    | Clostridia   | 0                   | 0                    | 0                   | 0                    |
| <b>seq1730</b> | Firmicutes    | Clostridia   | 0                   | 0                    | 0                   | 0                    |
| <b>seq1737</b> | Firmicutes    | Clostridia   | 3                   | 8                    | 0                   | 0                    |
| <b>seq1740</b> | Firmicutes    | Clostridia   | 0                   | 0                    | 0                   | 0                    |
| <b>seq1743</b> | Firmicutes    | Clostridia   | 0                   | 0                    | 0                   | 0                    |
| <b>seq1746</b> | Firmicutes    | Clostridia   | 0                   | 0                    | 0                   | 0                    |
| <b>seq1747</b> | Firmicutes    | Clostridia   | 0                   | 0                    | 0                   | 0                    |
| <b>seq1758</b> | Firmicutes    | Clostridia   | 0                   | 0                    | 0                   | 0                    |
| <b>seq1760</b> | Firmicutes    | Clostridia   | 0                   | 0                    | 0                   | 0                    |
| <b>seq1763</b> | Firmicutes    | Clostridia   | 0                   | 0                    | 0                   | 0                    |
| <b>seq1767</b> | Firmicutes    | Clostridia   | 0                   | 0                    | 0                   | 0                    |
| <b>seq1770</b> | Firmicutes    | Clostridia   | 0                   | 0                    | 0                   | 0                    |

Sequence Count Table

|                | <b>Phylum</b> | <b>Class</b> | <b>Subject26WK0</b> | <b>Subject26WK12</b> | <b>Subject14WK0</b> | <b>Subject14WK12</b> |
|----------------|---------------|--------------|---------------------|----------------------|---------------------|----------------------|
| <b>seq1633</b> | Firmicutes    | Clostridia   | 0                   | 0                    | 0                   | 0                    |
| <b>seq1639</b> | Firmicutes    | Clostridia   | 0                   | 0                    | 0                   | 0                    |
| <b>seq1641</b> | Firmicutes    | Clostridia   | 0                   | 0                    | 0                   | 0                    |
| <b>seq1648</b> | Firmicutes    | Clostridia   | 0                   | 0                    | 0                   | 0                    |
| <b>seq1651</b> | Firmicutes    | Clostridia   | 0                   | 0                    | 0                   | 0                    |
| <b>seq1657</b> | Firmicutes    | Clostridia   | 0                   | 0                    | 0                   | 0                    |
| <b>seq1659</b> | Firmicutes    | Clostridia   | 0                   | 0                    | 0                   | 0                    |
| <b>seq1671</b> | Firmicutes    | Clostridia   | 0                   | 0                    | 0                   | 0                    |
| <b>seq1675</b> | Firmicutes    | Clostridia   | 0                   | 0                    | 0                   | 0                    |
| <b>seq1676</b> | Firmicutes    | Clostridia   | 0                   | 0                    | 0                   | 0                    |
| <b>seq1679</b> | Firmicutes    | Clostridia   | 0                   | 0                    | 0                   | 0                    |
| <b>seq1686</b> | Firmicutes    | Clostridia   | 0                   | 0                    | 0                   | 0                    |
| <b>seq1691</b> | Firmicutes    | Clostridia   | 0                   | 0                    | 0                   | 0                    |
| <b>seq1696</b> | Firmicutes    | Clostridia   | 0                   | 0                    | 0                   | 0                    |
| <b>seq1697</b> | Firmicutes    | Clostridia   | 0                   | 0                    | 0                   | 0                    |
| <b>seq1704</b> | Firmicutes    | Clostridia   | 0                   | 0                    | 0                   | 0                    |
| <b>seq1712</b> | Firmicutes    | Clostridia   | 0                   | 0                    | 0                   | 0                    |
| <b>seq1717</b> | Firmicutes    | Clostridia   | 0                   | 0                    | 0                   | 0                    |
| <b>seq1722</b> | Firmicutes    | Clostridia   | 0                   | 0                    | 0                   | 0                    |
| <b>seq1724</b> | Firmicutes    | Clostridia   | 0                   | 0                    | 0                   | 0                    |
| <b>seq1729</b> | Firmicutes    | Clostridia   | 0                   | 0                    | 0                   | 0                    |
| <b>seq1730</b> | Firmicutes    | Clostridia   | 0                   | 0                    | 0                   | 0                    |
| <b>seq1737</b> | Firmicutes    | Clostridia   | 0                   | 0                    | 0                   | 0                    |
| <b>seq1740</b> | Firmicutes    | Clostridia   | 0                   | 0                    | 0                   | 0                    |
| <b>seq1743</b> | Firmicutes    | Clostridia   | 0                   | 0                    | 0                   | 0                    |
| <b>seq1746</b> | Firmicutes    | Clostridia   | 0                   | 0                    | 0                   | 0                    |
| <b>seq1747</b> | Firmicutes    | Clostridia   | 0                   | 0                    | 0                   | 0                    |
| <b>seq1758</b> | Firmicutes    | Clostridia   | 0                   | 0                    | 0                   | 0                    |
| <b>seq1760</b> | Firmicutes    | Clostridia   | 10                  | 0                    | 0                   | 0                    |
| <b>seq1763</b> | Firmicutes    | Clostridia   | 0                   | 0                    | 0                   | 0                    |
| <b>seq1767</b> | Firmicutes    | Clostridia   | 0                   | 0                    | 0                   | 0                    |
| <b>seq1770</b> | Firmicutes    | Clostridia   | 0                   | 0                    | 0                   | 0                    |

Sequence Count Table

|                | <b>Phylum</b> | <b>Class</b> | <b>Subject27WK0</b> | <b>Subject27WK12</b> | <b>Subject15WK0</b> | <b>Subject15WK12</b> |
|----------------|---------------|--------------|---------------------|----------------------|---------------------|----------------------|
| <b>seq1633</b> | Firmicutes    | Clostridia   | 0                   | 0                    | 0                   | 0                    |
| <b>seq1639</b> | Firmicutes    | Clostridia   | 0                   | 0                    | 0                   | 0                    |
| <b>seq1641</b> | Firmicutes    | Clostridia   | 0                   | 0                    | 0                   | 0                    |
| <b>seq1648</b> | Firmicutes    | Clostridia   | 0                   | 0                    | 0                   | 0                    |
| <b>seq1651</b> | Firmicutes    | Clostridia   | 0                   | 0                    | 0                   | 0                    |
| <b>seq1657</b> | Firmicutes    | Clostridia   | 0                   | 0                    | 0                   | 0                    |
| <b>seq1659</b> | Firmicutes    | Clostridia   | 0                   | 0                    | 0                   | 0                    |
| <b>seq1671</b> | Firmicutes    | Clostridia   | 0                   | 0                    | 0                   | 0                    |
| <b>seq1675</b> | Firmicutes    | Clostridia   | 0                   | 0                    | 0                   | 0                    |
| <b>seq1676</b> | Firmicutes    | Clostridia   | 0                   | 0                    | 0                   | 0                    |
| <b>seq1679</b> | Firmicutes    | Clostridia   | 0                   | 0                    | 0                   | 0                    |
| <b>seq1686</b> | Firmicutes    | Clostridia   | 0                   | 14                   | 0                   | 0                    |
| <b>seq1691</b> | Firmicutes    | Clostridia   | 0                   | 0                    | 0                   | 0                    |
| <b>seq1696</b> | Firmicutes    | Clostridia   | 0                   | 0                    | 0                   | 0                    |
| <b>seq1697</b> | Firmicutes    | Clostridia   | 0                   | 0                    | 0                   | 0                    |
| <b>seq1704</b> | Firmicutes    | Clostridia   | 5                   | 0                    | 0                   | 0                    |
| <b>seq1712</b> | Firmicutes    | Clostridia   | 0                   | 0                    | 0                   | 0                    |
| <b>seq1717</b> | Firmicutes    | Clostridia   | 0                   | 0                    | 0                   | 0                    |
| <b>seq1722</b> | Firmicutes    | Clostridia   | 0                   | 0                    | 0                   | 0                    |
| <b>seq1724</b> | Firmicutes    | Clostridia   | 0                   | 0                    | 0                   | 0                    |
| <b>seq1729</b> | Firmicutes    | Clostridia   | 0                   | 0                    | 0                   | 0                    |
| <b>seq1730</b> | Firmicutes    | Clostridia   | 0                   | 0                    | 0                   | 0                    |
| <b>seq1737</b> | Firmicutes    | Clostridia   | 0                   | 0                    | 0                   | 0                    |
| <b>seq1740</b> | Firmicutes    | Clostridia   | 0                   | 0                    | 0                   | 0                    |
| <b>seq1743</b> | Firmicutes    | Clostridia   | 0                   | 0                    | 0                   | 0                    |
| <b>seq1746</b> | Firmicutes    | Clostridia   | 0                   | 0                    | 0                   | 0                    |
| <b>seq1747</b> | Firmicutes    | Clostridia   | 0                   | 0                    | 0                   | 0                    |
| <b>seq1758</b> | Firmicutes    | Clostridia   | 0                   | 0                    | 0                   | 0                    |
| <b>seq1760</b> | Firmicutes    | Clostridia   | 0                   | 0                    | 0                   | 0                    |
| <b>seq1763</b> | Firmicutes    | Clostridia   | 0                   | 0                    | 0                   | 0                    |
| <b>seq1767</b> | Firmicutes    | Clostridia   | 0                   | 0                    | 0                   | 0                    |
| <b>seq1770</b> | Firmicutes    | Clostridia   | 0                   | 0                    | 0                   | 0                    |

Sequence Count Table

|                | <b>Phylum</b> | <b>Class</b> | <b>Δ</b> |  |  |  |
|----------------|---------------|--------------|----------|--|--|--|
| <b>seq1633</b> | Firmicutes    | Clostridia   |          |  |  |  |
| <b>seq1639</b> | Firmicutes    | Clostridia   |          |  |  |  |
| <b>seq1641</b> | Firmicutes    | Clostridia   |          |  |  |  |
| <b>seq1648</b> | Firmicutes    | Clostridia   |          |  |  |  |
| <b>seq1651</b> | Firmicutes    | Clostridia   |          |  |  |  |
| <b>seq1657</b> | Firmicutes    | Clostridia   |          |  |  |  |
| <b>seq1659</b> | Firmicutes    | Clostridia   |          |  |  |  |
| <b>seq1671</b> | Firmicutes    | Clostridia   |          |  |  |  |
| <b>seq1675</b> | Firmicutes    | Clostridia   |          |  |  |  |
| <b>seq1676</b> | Firmicutes    | Clostridia   |          |  |  |  |
| <b>seq1679</b> | Firmicutes    | Clostridia   |          |  |  |  |
| <b>seq1686</b> | Firmicutes    | Clostridia   |          |  |  |  |
| <b>seq1691</b> | Firmicutes    | Clostridia   |          |  |  |  |
| <b>seq1696</b> | Firmicutes    | Clostridia   |          |  |  |  |
| <b>seq1697</b> | Firmicutes    | Clostridia   |          |  |  |  |
| <b>seq1704</b> | Firmicutes    | Clostridia   |          |  |  |  |
| <b>seq1712</b> | Firmicutes    | Clostridia   |          |  |  |  |
| <b>seq1717</b> | Firmicutes    | Clostridia   |          |  |  |  |
| <b>seq1722</b> | Firmicutes    | Clostridia   |          |  |  |  |
| <b>seq1724</b> | Firmicutes    | Clostridia   |          |  |  |  |
| <b>seq1729</b> | Firmicutes    | Clostridia   |          |  |  |  |
| <b>seq1730</b> | Firmicutes    | Clostridia   |          |  |  |  |
| <b>seq1737</b> | Firmicutes    | Clostridia   |          |  |  |  |
| <b>seq1740</b> | Firmicutes    | Clostridia   |          |  |  |  |
| <b>seq1743</b> | Firmicutes    | Clostridia   |          |  |  |  |
| <b>seq1746</b> | Firmicutes    | Clostridia   |          |  |  |  |
| <b>seq1747</b> | Firmicutes    | Clostridia   |          |  |  |  |
| <b>seq1758</b> | Firmicutes    | Clostridia   |          |  |  |  |
| <b>seq1760</b> | Firmicutes    | Clostridia   |          |  |  |  |
| <b>seq1763</b> | Firmicutes    | Clostridia   |          |  |  |  |
| <b>seq1767</b> | Firmicutes    | Clostridia   |          |  |  |  |
| <b>seq1770</b> | Firmicutes    | Clostridia   |          |  |  |  |

Sequence Count Table

|                | <b>Phylum</b> | <b>Class</b> | <b>Order</b>  | <b>Family</b>   |
|----------------|---------------|--------------|---------------|-----------------|
| <b>seq1774</b> | Firmicutes    | Clostridia   | Clostridiales | Ruminococcaceae |
| <b>seq1784</b> | Firmicutes    | Clostridia   | Clostridiales | Ruminococcaceae |
| <b>seq1791</b> | Firmicutes    | Clostridia   | Clostridiales | Ruminococcaceae |
| <b>seq1795</b> | Firmicutes    | Clostridia   | Clostridiales | Ruminococcaceae |
| <b>seq1796</b> | Firmicutes    | Clostridia   | Clostridiales | Ruminococcaceae |
| <b>seq1798</b> | Firmicutes    | Clostridia   | Clostridiales | Ruminococcaceae |
| <b>seq1799</b> | Firmicutes    | Clostridia   | Clostridiales | Ruminococcaceae |
| <b>seq1816</b> | Firmicutes    | Clostridia   | Clostridiales | Ruminococcaceae |
| <b>seq1818</b> | Firmicutes    | Clostridia   | Clostridiales | Ruminococcaceae |
| <b>seq1824</b> | Firmicutes    | Clostridia   | Clostridiales | Ruminococcaceae |
| <b>seq1825</b> | Firmicutes    | Clostridia   | Clostridiales | Ruminococcaceae |
| <b>seq1826</b> | Firmicutes    | Clostridia   | Clostridiales | Ruminococcaceae |
| <b>seq1830</b> | Firmicutes    | Clostridia   | Clostridiales | Ruminococcaceae |
| <b>seq1831</b> | Firmicutes    | Clostridia   | Clostridiales | Ruminococcaceae |
| <b>seq1832</b> | Firmicutes    | Clostridia   | Clostridiales | Ruminococcaceae |
| <b>seq1835</b> | Firmicutes    | Clostridia   | Clostridiales | Ruminococcaceae |
| <b>seq1838</b> | Firmicutes    | Clostridia   | Clostridiales | Ruminococcaceae |
| <b>seq1841</b> | Firmicutes    | Clostridia   | Clostridiales | Ruminococcaceae |
| <b>seq1842</b> | Firmicutes    | Clostridia   | Clostridiales | Ruminococcaceae |
| <b>seq1845</b> | Firmicutes    | Clostridia   | Clostridiales | Ruminococcaceae |
| <b>seq1846</b> | Firmicutes    | Clostridia   | Clostridiales | Ruminococcaceae |
| <b>seq1852</b> | Firmicutes    | Clostridia   | Clostridiales | Ruminococcaceae |
| <b>seq1854</b> | Firmicutes    | Clostridia   | Clostridiales | Ruminococcaceae |
| <b>seq1858</b> | Firmicutes    | Clostridia   | Clostridiales | Ruminococcaceae |
| <b>seq1861</b> | Firmicutes    | Clostridia   | Clostridiales | Ruminococcaceae |
| <b>seq1868</b> | Firmicutes    | Clostridia   | Clostridiales | Ruminococcaceae |
| <b>seq1870</b> | Firmicutes    | Clostridia   | Clostridiales | Ruminococcaceae |
| <b>seq1871</b> | Firmicutes    | Clostridia   | Clostridiales | Ruminococcaceae |
| <b>seq1872</b> | Firmicutes    | Clostridia   | Clostridiales | Ruminococcaceae |
| <b>seq1873</b> | Firmicutes    | Clostridia   | Clostridiales | Ruminococcaceae |
| <b>seq1876</b> | Firmicutes    | Clostridia   | Clostridiales | Ruminococcaceae |
| <b>seq1882</b> | Firmicutes    | Clostridia   | Clostridiales | Ruminococcaceae |

Sequence Count Table

|                | <b>Phylum</b> | <b>Class</b> | <b>Genus</b> | <b>Species</b> |
|----------------|---------------|--------------|--------------|----------------|
| <b>seq1774</b> | Firmicutes    | Clostridia   |              |                |
| <b>seq1784</b> | Firmicutes    | Clostridia   |              |                |
| <b>seq1791</b> | Firmicutes    | Clostridia   |              |                |
| <b>seq1795</b> | Firmicutes    | Clostridia   |              |                |
| <b>seq1796</b> | Firmicutes    | Clostridia   |              |                |
| <b>seq1798</b> | Firmicutes    | Clostridia   |              |                |
| <b>seq1799</b> | Firmicutes    | Clostridia   |              |                |
| <b>seq1816</b> | Firmicutes    | Clostridia   |              |                |
| <b>seq1818</b> | Firmicutes    | Clostridia   |              |                |
| <b>seq1824</b> | Firmicutes    | Clostridia   |              |                |
| <b>seq1825</b> | Firmicutes    | Clostridia   |              |                |
| <b>seq1826</b> | Firmicutes    | Clostridia   |              |                |
| <b>seq1830</b> | Firmicutes    | Clostridia   |              |                |
| <b>seq1831</b> | Firmicutes    | Clostridia   |              |                |
| <b>seq1832</b> | Firmicutes    | Clostridia   |              |                |
| <b>seq1835</b> | Firmicutes    | Clostridia   |              |                |
| <b>seq1838</b> | Firmicutes    | Clostridia   |              |                |
| <b>seq1841</b> | Firmicutes    | Clostridia   |              |                |
| <b>seq1842</b> | Firmicutes    | Clostridia   |              |                |
| <b>seq1845</b> | Firmicutes    | Clostridia   |              |                |
| <b>seq1846</b> | Firmicutes    | Clostridia   |              |                |
| <b>seq1852</b> | Firmicutes    | Clostridia   |              |                |
| <b>seq1854</b> | Firmicutes    | Clostridia   |              |                |
| <b>seq1858</b> | Firmicutes    | Clostridia   |              |                |
| <b>seq1861</b> | Firmicutes    | Clostridia   |              |                |
| <b>seq1868</b> | Firmicutes    | Clostridia   |              |                |
| <b>seq1870</b> | Firmicutes    | Clostridia   |              |                |
| <b>seq1871</b> | Firmicutes    | Clostridia   |              |                |
| <b>seq1872</b> | Firmicutes    | Clostridia   |              |                |
| <b>seq1873</b> | Firmicutes    | Clostridia   |              |                |
| <b>seq1876</b> | Firmicutes    | Clostridia   |              |                |
| <b>seq1882</b> | Firmicutes    | Clostridia   |              |                |

Sequence Count Table

|                | <b>Phylum</b> | <b>Class</b> | <b>Subject34WK0</b> | <b>Subject34WK12</b> | <b>Subject16WK0</b> | <b>Subject16WK12</b> |
|----------------|---------------|--------------|---------------------|----------------------|---------------------|----------------------|
| <b>seq1774</b> | Firmicutes    | Clostridia   | 0                   | 0                    | 0                   | 0                    |
| <b>seq1784</b> | Firmicutes    | Clostridia   | 0                   | 0                    | 0                   | 0                    |
| <b>seq1791</b> | Firmicutes    | Clostridia   | 0                   | 0                    | 0                   | 0                    |
| <b>seq1795</b> | Firmicutes    | Clostridia   | 0                   | 0                    | 0                   | 0                    |
| <b>seq1796</b> | Firmicutes    | Clostridia   | 0                   | 0                    | 0                   | 0                    |
| <b>seq1798</b> | Firmicutes    | Clostridia   | 0                   | 0                    | 0                   | 0                    |
| <b>seq1799</b> | Firmicutes    | Clostridia   | 0                   | 0                    | 0                   | 0                    |
| <b>seq1816</b> | Firmicutes    | Clostridia   | 0                   | 0                    | 0                   | 0                    |
| <b>seq1818</b> | Firmicutes    | Clostridia   | 0                   | 0                    | 0                   | 0                    |
| <b>seq1824</b> | Firmicutes    | Clostridia   | 0                   | 0                    | 0                   | 0                    |
| <b>seq1825</b> | Firmicutes    | Clostridia   | 0                   | 0                    | 0                   | 0                    |
| <b>seq1826</b> | Firmicutes    | Clostridia   | 0                   | 0                    | 0                   | 0                    |
| <b>seq1830</b> | Firmicutes    | Clostridia   | 0                   | 0                    | 0                   | 0                    |
| <b>seq1831</b> | Firmicutes    | Clostridia   | 0                   | 0                    | 0                   | 0                    |
| <b>seq1832</b> | Firmicutes    | Clostridia   | 0                   | 0                    | 0                   | 0                    |
| <b>seq1835</b> | Firmicutes    | Clostridia   | 0                   | 0                    | 0                   | 0                    |
| <b>seq1838</b> | Firmicutes    | Clostridia   | 0                   | 0                    | 0                   | 0                    |
| <b>seq1841</b> | Firmicutes    | Clostridia   | 0                   | 0                    | 0                   | 0                    |
| <b>seq1842</b> | Firmicutes    | Clostridia   | 0                   | 0                    | 0                   | 0                    |
| <b>seq1845</b> | Firmicutes    | Clostridia   | 0                   | 0                    | 0                   | 0                    |
| <b>seq1846</b> | Firmicutes    | Clostridia   | 0                   | 0                    | 0                   | 0                    |
| <b>seq1852</b> | Firmicutes    | Clostridia   | 0                   | 0                    | 0                   | 0                    |
| <b>seq1854</b> | Firmicutes    | Clostridia   | 0                   | 0                    | 0                   | 0                    |
| <b>seq1858</b> | Firmicutes    | Clostridia   | 0                   | 0                    | 0                   | 0                    |
| <b>seq1861</b> | Firmicutes    | Clostridia   | 0                   | 0                    | 0                   | 0                    |
| <b>seq1868</b> | Firmicutes    | Clostridia   | 0                   | 0                    | 0                   | 0                    |
| <b>seq1870</b> | Firmicutes    | Clostridia   | 0                   | 0                    | 0                   | 0                    |
| <b>seq1871</b> | Firmicutes    | Clostridia   | 0                   | 0                    | 0                   | 0                    |
| <b>seq1872</b> | Firmicutes    | Clostridia   | 0                   | 0                    | 0                   | 0                    |
| <b>seq1873</b> | Firmicutes    | Clostridia   | 0                   | 0                    | 0                   | 4                    |
| <b>seq1876</b> | Firmicutes    | Clostridia   | 0                   | 0                    | 0                   | 0                    |
| <b>seq1882</b> | Firmicutes    | Clostridia   | 0                   | 0                    | 0                   | 0                    |



Sequence Count Table

|                | <b>Phylum</b> | <b>Class</b> | <b>Subject17WK0</b> | <b>Subject17WK12</b> | <b>Subject1WK0</b> | <b>Subject1WK12</b> |
|----------------|---------------|--------------|---------------------|----------------------|--------------------|---------------------|
| <b>seq1774</b> | Firmicutes    | Clostridia   | 0                   | 0                    | 0                  | 0                   |
| <b>seq1784</b> | Firmicutes    | Clostridia   | 8                   | 0                    | 0                  | 0                   |
| <b>seq1791</b> | Firmicutes    | Clostridia   | 0                   | 0                    | 0                  | 0                   |
| <b>seq1795</b> | Firmicutes    | Clostridia   | 0                   | 0                    | 0                  | 0                   |
| <b>seq1796</b> | Firmicutes    | Clostridia   | 0                   | 0                    | 0                  | 0                   |
| <b>seq1798</b> | Firmicutes    | Clostridia   | 0                   | 0                    | 0                  | 0                   |
| <b>seq1799</b> | Firmicutes    | Clostridia   | 0                   | 0                    | 0                  | 0                   |
| <b>seq1816</b> | Firmicutes    | Clostridia   | 0                   | 0                    | 0                  | 0                   |
| <b>seq1818</b> | Firmicutes    | Clostridia   | 0                   | 0                    | 0                  | 0                   |
| <b>seq1824</b> | Firmicutes    | Clostridia   | 0                   | 0                    | 0                  | 0                   |
| <b>seq1825</b> | Firmicutes    | Clostridia   | 0                   | 0                    | 0                  | 0                   |
| <b>seq1826</b> | Firmicutes    | Clostridia   | 0                   | 0                    | 0                  | 0                   |
| <b>seq1830</b> | Firmicutes    | Clostridia   | 0                   | 0                    | 0                  | 0                   |
| <b>seq1831</b> | Firmicutes    | Clostridia   | 0                   | 0                    | 0                  | 0                   |
| <b>seq1832</b> | Firmicutes    | Clostridia   | 0                   | 0                    | 0                  | 0                   |
| <b>seq1835</b> | Firmicutes    | Clostridia   | 0                   | 0                    | 0                  | 0                   |
| <b>seq1838</b> | Firmicutes    | Clostridia   | 0                   | 0                    | 0                  | 0                   |
| <b>seq1841</b> | Firmicutes    | Clostridia   | 0                   | 0                    | 0                  | 0                   |
| <b>seq1842</b> | Firmicutes    | Clostridia   | 0                   | 0                    | 0                  | 0                   |
| <b>seq1845</b> | Firmicutes    | Clostridia   | 0                   | 5                    | 0                  | 0                   |
| <b>seq1846</b> | Firmicutes    | Clostridia   | 0                   | 0                    | 0                  | 0                   |
| <b>seq1852</b> | Firmicutes    | Clostridia   | 0                   | 0                    | 0                  | 0                   |
| <b>seq1854</b> | Firmicutes    | Clostridia   | 0                   | 0                    | 0                  | 0                   |
| <b>seq1858</b> | Firmicutes    | Clostridia   | 0                   | 0                    | 0                  | 0                   |
| <b>seq1861</b> | Firmicutes    | Clostridia   | 0                   | 0                    | 0                  | 0                   |
| <b>seq1868</b> | Firmicutes    | Clostridia   | 0                   | 0                    | 0                  | 0                   |
| <b>seq1870</b> | Firmicutes    | Clostridia   | 0                   | 0                    | 0                  | 0                   |
| <b>seq1871</b> | Firmicutes    | Clostridia   | 0                   | 0                    | 0                  | 0                   |
| <b>seq1872</b> | Firmicutes    | Clostridia   | 0                   | 0                    | 0                  | 0                   |
| <b>seq1873</b> | Firmicutes    | Clostridia   | 0                   | 0                    | 0                  | 0                   |
| <b>seq1876</b> | Firmicutes    | Clostridia   | 0                   | 2                    | 0                  | 0                   |
| <b>seq1882</b> | Firmicutes    | Clostridia   | 0                   | 0                    | 0                  | 0                   |

Sequence Count Table

|                | <b>Phylum</b> | <b>Class</b> | <b>Subject2WK0</b> | <b>Subject2WK12</b> | <b>Subject3WK0</b> | <b>Subject3WK12</b> |
|----------------|---------------|--------------|--------------------|---------------------|--------------------|---------------------|
| <b>seq1774</b> | Firmicutes    | Clostridia   | 0                  | 0                   | 0                  | 0                   |
| <b>seq1784</b> | Firmicutes    | Clostridia   | 0                  | 0                   | 0                  | 0                   |
| <b>seq1791</b> | Firmicutes    | Clostridia   | 0                  | 0                   | 0                  | 0                   |
| <b>seq1795</b> | Firmicutes    | Clostridia   | 0                  | 0                   | 0                  | 0                   |
| <b>seq1796</b> | Firmicutes    | Clostridia   | 0                  | 0                   | 0                  | 0                   |
| <b>seq1798</b> | Firmicutes    | Clostridia   | 0                  | 0                   | 0                  | 0                   |
| <b>seq1799</b> | Firmicutes    | Clostridia   | 0                  | 0                   | 0                  | 0                   |
| <b>seq1816</b> | Firmicutes    | Clostridia   | 0                  | 0                   | 0                  | 0                   |
| <b>seq1818</b> | Firmicutes    | Clostridia   | 0                  | 0                   | 0                  | 0                   |
| <b>seq1824</b> | Firmicutes    | Clostridia   | 0                  | 0                   | 0                  | 0                   |
| <b>seq1825</b> | Firmicutes    | Clostridia   | 0                  | 0                   | 0                  | 0                   |
| <b>seq1826</b> | Firmicutes    | Clostridia   | 0                  | 0                   | 0                  | 0                   |
| <b>seq1830</b> | Firmicutes    | Clostridia   | 0                  | 0                   | 0                  | 0                   |
| <b>seq1831</b> | Firmicutes    | Clostridia   | 0                  | 0                   | 0                  | 0                   |
| <b>seq1832</b> | Firmicutes    | Clostridia   | 0                  | 0                   | 0                  | 0                   |
| <b>seq1835</b> | Firmicutes    | Clostridia   | 0                  | 0                   | 0                  | 0                   |
| <b>seq1838</b> | Firmicutes    | Clostridia   | 0                  | 0                   | 0                  | 0                   |
| <b>seq1841</b> | Firmicutes    | Clostridia   | 0                  | 0                   | 0                  | 0                   |
| <b>seq1842</b> | Firmicutes    | Clostridia   | 0                  | 0                   | 0                  | 0                   |
| <b>seq1845</b> | Firmicutes    | Clostridia   | 0                  | 0                   | 0                  | 0                   |
| <b>seq1846</b> | Firmicutes    | Clostridia   | 0                  | 0                   | 0                  | 0                   |
| <b>seq1852</b> | Firmicutes    | Clostridia   | 0                  | 0                   | 0                  | 0                   |
| <b>seq1854</b> | Firmicutes    | Clostridia   | 0                  | 0                   | 0                  | 0                   |
| <b>seq1858</b> | Firmicutes    | Clostridia   | 0                  | 0                   | 0                  | 0                   |
| <b>seq1861</b> | Firmicutes    | Clostridia   | 0                  | 0                   | 0                  | 0                   |
| <b>seq1868</b> | Firmicutes    | Clostridia   | 0                  | 0                   | 0                  | 0                   |
| <b>seq1870</b> | Firmicutes    | Clostridia   | 0                  | 0                   | 0                  | 0                   |
| <b>seq1871</b> | Firmicutes    | Clostridia   | 0                  | 0                   | 0                  | 0                   |
| <b>seq1872</b> | Firmicutes    | Clostridia   | 0                  | 0                   | 0                  | 0                   |
| <b>seq1873</b> | Firmicutes    | Clostridia   | 0                  | 0                   | 0                  | 0                   |
| <b>seq1876</b> | Firmicutes    | Clostridia   | 0                  | 0                   | 0                  | 0                   |
| <b>seq1882</b> | Firmicutes    | Clostridia   | 0                  | 0                   | 0                  | 0                   |

Sequence Count Table

|                | <b>Phylum</b> | <b>Class</b> | <b>Subject4WK0</b> | <b>Subject4WK12</b> | <b>Subject5WK0</b> | <b>Subject5WK12</b> |
|----------------|---------------|--------------|--------------------|---------------------|--------------------|---------------------|
| <b>seq1774</b> | Firmicutes    | Clostridia   | 0                  | 0                   | 0                  | 0                   |
| <b>seq1784</b> | Firmicutes    | Clostridia   | 0                  | 0                   | 0                  | 0                   |
| <b>seq1791</b> | Firmicutes    | Clostridia   | 0                  | 0                   | 0                  | 0                   |
| <b>seq1795</b> | Firmicutes    | Clostridia   | 0                  | 0                   | 0                  | 0                   |
| <b>seq1796</b> | Firmicutes    | Clostridia   | 0                  | 0                   | 0                  | 0                   |
| <b>seq1798</b> | Firmicutes    | Clostridia   | 0                  | 0                   | 0                  | 0                   |
| <b>seq1799</b> | Firmicutes    | Clostridia   | 0                  | 0                   | 0                  | 0                   |
| <b>seq1816</b> | Firmicutes    | Clostridia   | 0                  | 0                   | 0                  | 0                   |
| <b>seq1818</b> | Firmicutes    | Clostridia   | 0                  | 0                   | 0                  | 0                   |
| <b>seq1824</b> | Firmicutes    | Clostridia   | 0                  | 6                   | 0                  | 0                   |
| <b>seq1825</b> | Firmicutes    | Clostridia   | 0                  | 0                   | 0                  | 0                   |
| <b>seq1826</b> | Firmicutes    | Clostridia   | 0                  | 0                   | 0                  | 0                   |
| <b>seq1830</b> | Firmicutes    | Clostridia   | 0                  | 0                   | 0                  | 0                   |
| <b>seq1831</b> | Firmicutes    | Clostridia   | 0                  | 0                   | 0                  | 0                   |
| <b>seq1832</b> | Firmicutes    | Clostridia   | 0                  | 0                   | 0                  | 0                   |
| <b>seq1835</b> | Firmicutes    | Clostridia   | 0                  | 0                   | 0                  | 0                   |
| <b>seq1838</b> | Firmicutes    | Clostridia   | 0                  | 0                   | 0                  | 0                   |
| <b>seq1841</b> | Firmicutes    | Clostridia   | 0                  | 0                   | 0                  | 0                   |
| <b>seq1842</b> | Firmicutes    | Clostridia   | 0                  | 0                   | 0                  | 0                   |
| <b>seq1845</b> | Firmicutes    | Clostridia   | 0                  | 0                   | 0                  | 0                   |
| <b>seq1846</b> | Firmicutes    | Clostridia   | 5                  | 0                   | 0                  | 0                   |
| <b>seq1852</b> | Firmicutes    | Clostridia   | 0                  | 0                   | 0                  | 0                   |
| <b>seq1854</b> | Firmicutes    | Clostridia   | 0                  | 0                   | 0                  | 0                   |
| <b>seq1858</b> | Firmicutes    | Clostridia   | 0                  | 0                   | 0                  | 0                   |
| <b>seq1861</b> | Firmicutes    | Clostridia   | 0                  | 0                   | 0                  | 0                   |
| <b>seq1868</b> | Firmicutes    | Clostridia   | 0                  | 0                   | 0                  | 0                   |
| <b>seq1870</b> | Firmicutes    | Clostridia   | 0                  | 0                   | 0                  | 0                   |
| <b>seq1871</b> | Firmicutes    | Clostridia   | 0                  | 0                   | 0                  | 0                   |
| <b>seq1872</b> | Firmicutes    | Clostridia   | 0                  | 0                   | 0                  | 0                   |
| <b>seq1873</b> | Firmicutes    | Clostridia   | 0                  | 0                   | 0                  | 0                   |
| <b>seq1876</b> | Firmicutes    | Clostridia   | 0                  | 0                   | 0                  | 0                   |
| <b>seq1882</b> | Firmicutes    | Clostridia   | 0                  | 0                   | 0                  | 0                   |

Sequence Count Table

|                | <b>Phylum</b> | <b>Class</b> | <b>Subject6WK0</b> | <b>Subject6WK12</b> | <b>Subject18WK0</b> | <b>Subject18WK12</b> |
|----------------|---------------|--------------|--------------------|---------------------|---------------------|----------------------|
| <b>seq1774</b> | Firmicutes    | Clostridia   | 0                  | 0                   | 0                   | 0                    |
| <b>seq1784</b> | Firmicutes    | Clostridia   | 0                  | 0                   | 0                   | 0                    |
| <b>seq1791</b> | Firmicutes    | Clostridia   | 0                  | 0                   | 8                   | 0                    |
| <b>seq1795</b> | Firmicutes    | Clostridia   | 0                  | 0                   | 0                   | 0                    |
| <b>seq1796</b> | Firmicutes    | Clostridia   | 0                  | 0                   | 0                   | 0                    |
| <b>seq1798</b> | Firmicutes    | Clostridia   | 0                  | 0                   | 0                   | 0                    |
| <b>seq1799</b> | Firmicutes    | Clostridia   | 0                  | 0                   | 0                   | 0                    |
| <b>seq1816</b> | Firmicutes    | Clostridia   | 0                  | 0                   | 0                   | 0                    |
| <b>seq1818</b> | Firmicutes    | Clostridia   | 0                  | 0                   | 0                   | 0                    |
| <b>seq1824</b> | Firmicutes    | Clostridia   | 0                  | 0                   | 0                   | 0                    |
| <b>seq1825</b> | Firmicutes    | Clostridia   | 0                  | 0                   | 6                   | 0                    |
| <b>seq1826</b> | Firmicutes    | Clostridia   | 0                  | 0                   | 6                   | 0                    |
| <b>seq1830</b> | Firmicutes    | Clostridia   | 0                  | 0                   | 0                   | 0                    |
| <b>seq1831</b> | Firmicutes    | Clostridia   | 0                  | 0                   | 0                   | 0                    |
| <b>seq1832</b> | Firmicutes    | Clostridia   | 0                  | 0                   | 0                   | 0                    |
| <b>seq1835</b> | Firmicutes    | Clostridia   | 0                  | 0                   | 0                   | 0                    |
| <b>seq1838</b> | Firmicutes    | Clostridia   | 0                  | 0                   | 0                   | 0                    |
| <b>seq1841</b> | Firmicutes    | Clostridia   | 0                  | 0                   | 0                   | 0                    |
| <b>seq1842</b> | Firmicutes    | Clostridia   | 0                  | 0                   | 0                   | 0                    |
| <b>seq1845</b> | Firmicutes    | Clostridia   | 0                  | 0                   | 0                   | 0                    |
| <b>seq1846</b> | Firmicutes    | Clostridia   | 0                  | 0                   | 0                   | 0                    |
| <b>seq1852</b> | Firmicutes    | Clostridia   | 0                  | 0                   | 0                   | 0                    |
| <b>seq1854</b> | Firmicutes    | Clostridia   | 0                  | 0                   | 0                   | 0                    |
| <b>seq1858</b> | Firmicutes    | Clostridia   | 0                  | 0                   | 0                   | 0                    |
| <b>seq1861</b> | Firmicutes    | Clostridia   | 0                  | 0                   | 0                   | 0                    |
| <b>seq1868</b> | Firmicutes    | Clostridia   | 0                  | 0                   | 0                   | 0                    |
| <b>seq1870</b> | Firmicutes    | Clostridia   | 0                  | 0                   | 0                   | 0                    |
| <b>seq1871</b> | Firmicutes    | Clostridia   | 0                  | 0                   | 0                   | 0                    |
| <b>seq1872</b> | Firmicutes    | Clostridia   | 0                  | 0                   | 0                   | 0                    |
| <b>seq1873</b> | Firmicutes    | Clostridia   | 0                  | 0                   | 0                   | 0                    |
| <b>seq1876</b> | Firmicutes    | Clostridia   | 0                  | 0                   | 0                   | 0                    |
| <b>seq1882</b> | Firmicutes    | Clostridia   | 0                  | 0                   | 0                   | 0                    |

Sequence Count Table

|                | <b>Phylum</b> | <b>Class</b> | <b>Subject19WK0</b> | <b>Subject19WK12</b> | <b>Subject20WK0</b> | <b>Subject20WK12</b> |
|----------------|---------------|--------------|---------------------|----------------------|---------------------|----------------------|
| <b>seq1774</b> | Firmicutes    | Clostridia   | 0                   | 0                    | 0                   | 0                    |
| <b>seq1784</b> | Firmicutes    | Clostridia   | 0                   | 0                    | 0                   | 0                    |
| <b>seq1791</b> | Firmicutes    | Clostridia   | 0                   | 0                    | 0                   | 0                    |
| <b>seq1795</b> | Firmicutes    | Clostridia   | 0                   | 0                    | 0                   | 0                    |
| <b>seq1796</b> | Firmicutes    | Clostridia   | 0                   | 0                    | 0                   | 0                    |
| <b>seq1798</b> | Firmicutes    | Clostridia   | 0                   | 0                    | 0                   | 0                    |
| <b>seq1799</b> | Firmicutes    | Clostridia   | 0                   | 0                    | 0                   | 0                    |
| <b>seq1816</b> | Firmicutes    | Clostridia   | 0                   | 0                    | 0                   | 0                    |
| <b>seq1818</b> | Firmicutes    | Clostridia   | 0                   | 0                    | 0                   | 0                    |
| <b>seq1824</b> | Firmicutes    | Clostridia   | 0                   | 0                    | 0                   | 0                    |
| <b>seq1825</b> | Firmicutes    | Clostridia   | 0                   | 0                    | 0                   | 0                    |
| <b>seq1826</b> | Firmicutes    | Clostridia   | 0                   | 0                    | 0                   | 0                    |
| <b>seq1830</b> | Firmicutes    | Clostridia   | 0                   | 0                    | 0                   | 0                    |
| <b>seq1831</b> | Firmicutes    | Clostridia   | 0                   | 0                    | 0                   | 0                    |
| <b>seq1832</b> | Firmicutes    | Clostridia   | 0                   | 0                    | 0                   | 0                    |
| <b>seq1835</b> | Firmicutes    | Clostridia   | 0                   | 0                    | 0                   | 0                    |
| <b>seq1838</b> | Firmicutes    | Clostridia   | 0                   | 0                    | 0                   | 0                    |
| <b>seq1841</b> | Firmicutes    | Clostridia   | 0                   | 0                    | 0                   | 0                    |
| <b>seq1842</b> | Firmicutes    | Clostridia   | 0                   | 0                    | 0                   | 0                    |
| <b>seq1845</b> | Firmicutes    | Clostridia   | 0                   | 0                    | 0                   | 0                    |
| <b>seq1846</b> | Firmicutes    | Clostridia   | 0                   | 0                    | 0                   | 0                    |
| <b>seq1852</b> | Firmicutes    | Clostridia   | 0                   | 0                    | 0                   | 0                    |
| <b>seq1854</b> | Firmicutes    | Clostridia   | 0                   | 0                    | 0                   | 0                    |
| <b>seq1858</b> | Firmicutes    | Clostridia   | 0                   | 0                    | 0                   | 0                    |
| <b>seq1861</b> | Firmicutes    | Clostridia   | 0                   | 0                    | 0                   | 0                    |
| <b>seq1868</b> | Firmicutes    | Clostridia   | 0                   | 0                    | 0                   | 0                    |
| <b>seq1870</b> | Firmicutes    | Clostridia   | 0                   | 0                    | 0                   | 0                    |
| <b>seq1871</b> | Firmicutes    | Clostridia   | 0                   | 0                    | 0                   | 0                    |
| <b>seq1872</b> | Firmicutes    | Clostridia   | 0                   | 0                    | 0                   | 0                    |
| <b>seq1873</b> | Firmicutes    | Clostridia   | 0                   | 0                    | 0                   | 0                    |
| <b>seq1876</b> | Firmicutes    | Clostridia   | 0                   | 0                    | 0                   | 0                    |
| <b>seq1882</b> | Firmicutes    | Clostridia   | 0                   | 0                    | 0                   | 0                    |

Sequence Count Table

|                | <b>Phylum</b> | <b>Class</b> | <b>Subject7WK0</b> | <b>Subject7WK12</b> | <b>Subject21WK0</b> | <b>Subject21WK12</b> |
|----------------|---------------|--------------|--------------------|---------------------|---------------------|----------------------|
| <b>seq1774</b> | Firmicutes    | Clostridia   | 0                  | 0                   | 0                   | 0                    |
| <b>seq1784</b> | Firmicutes    | Clostridia   | 0                  | 0                   | 0                   | 0                    |
| <b>seq1791</b> | Firmicutes    | Clostridia   | 0                  | 0                   | 0                   | 0                    |
| <b>seq1795</b> | Firmicutes    | Clostridia   | 0                  | 0                   | 0                   | 0                    |
| <b>seq1796</b> | Firmicutes    | Clostridia   | 0                  | 0                   | 0                   | 0                    |
| <b>seq1798</b> | Firmicutes    | Clostridia   | 0                  | 0                   | 0                   | 0                    |
| <b>seq1799</b> | Firmicutes    | Clostridia   | 0                  | 0                   | 0                   | 0                    |
| <b>seq1816</b> | Firmicutes    | Clostridia   | 0                  | 0                   | 0                   | 0                    |
| <b>seq1818</b> | Firmicutes    | Clostridia   | 0                  | 0                   | 0                   | 0                    |
| <b>seq1824</b> | Firmicutes    | Clostridia   | 0                  | 0                   | 0                   | 0                    |
| <b>seq1825</b> | Firmicutes    | Clostridia   | 0                  | 0                   | 0                   | 0                    |
| <b>seq1826</b> | Firmicutes    | Clostridia   | 0                  | 0                   | 0                   | 0                    |
| <b>seq1830</b> | Firmicutes    | Clostridia   | 0                  | 0                   | 0                   | 0                    |
| <b>seq1831</b> | Firmicutes    | Clostridia   | 0                  | 0                   | 0                   | 0                    |
| <b>seq1832</b> | Firmicutes    | Clostridia   | 0                  | 0                   | 0                   | 0                    |
| <b>seq1835</b> | Firmicutes    | Clostridia   | 0                  | 0                   | 0                   | 0                    |
| <b>seq1838</b> | Firmicutes    | Clostridia   | 0                  | 0                   | 0                   | 0                    |
| <b>seq1841</b> | Firmicutes    | Clostridia   | 0                  | 0                   | 0                   | 0                    |
| <b>seq1842</b> | Firmicutes    | Clostridia   | 0                  | 0                   | 0                   | 0                    |
| <b>seq1845</b> | Firmicutes    | Clostridia   | 0                  | 0                   | 0                   | 0                    |
| <b>seq1846</b> | Firmicutes    | Clostridia   | 0                  | 0                   | 0                   | 0                    |
| <b>seq1852</b> | Firmicutes    | Clostridia   | 5                  | 0                   | 0                   | 0                    |
| <b>seq1854</b> | Firmicutes    | Clostridia   | 0                  | 0                   | 0                   | 0                    |
| <b>seq1858</b> | Firmicutes    | Clostridia   | 0                  | 0                   | 0                   | 0                    |
| <b>seq1861</b> | Firmicutes    | Clostridia   | 0                  | 0                   | 0                   | 0                    |
| <b>seq1868</b> | Firmicutes    | Clostridia   | 0                  | 0                   | 0                   | 0                    |
| <b>seq1870</b> | Firmicutes    | Clostridia   | 0                  | 0                   | 0                   | 0                    |
| <b>seq1871</b> | Firmicutes    | Clostridia   | 0                  | 0                   | 0                   | 0                    |
| <b>seq1872</b> | Firmicutes    | Clostridia   | 0                  | 0                   | 0                   | 0                    |
| <b>seq1873</b> | Firmicutes    | Clostridia   | 0                  | 0                   | 0                   | 0                    |
| <b>seq1876</b> | Firmicutes    | Clostridia   | 0                  | 0                   | 0                   | 0                    |
| <b>seq1882</b> | Firmicutes    | Clostridia   | 0                  | 0                   | 0                   | 0                    |

Sequence Count Table

|                | <b>Phylum</b> | <b>Class</b> | <b>Subject8WK0</b> | <b>Subject8WK12</b> | <b>Subject9WK0</b> | <b>Subject9WK12</b> |
|----------------|---------------|--------------|--------------------|---------------------|--------------------|---------------------|
| <b>seq1774</b> | Firmicutes    | Clostridia   | 0                  | 0                   | 0                  | 0                   |
| <b>seq1784</b> | Firmicutes    | Clostridia   | 0                  | 0                   | 0                  | 0                   |
| <b>seq1791</b> | Firmicutes    | Clostridia   | 0                  | 0                   | 0                  | 0                   |
| <b>seq1795</b> | Firmicutes    | Clostridia   | 0                  | 0                   | 0                  | 0                   |
| <b>seq1796</b> | Firmicutes    | Clostridia   | 0                  | 0                   | 0                  | 0                   |
| <b>seq1798</b> | Firmicutes    | Clostridia   | 0                  | 0                   | 0                  | 0                   |
| <b>seq1799</b> | Firmicutes    | Clostridia   | 0                  | 0                   | 0                  | 0                   |
| <b>seq1816</b> | Firmicutes    | Clostridia   | 0                  | 0                   | 0                  | 0                   |
| <b>seq1818</b> | Firmicutes    | Clostridia   | 0                  | 0                   | 0                  | 0                   |
| <b>seq1824</b> | Firmicutes    | Clostridia   | 0                  | 0                   | 0                  | 0                   |
| <b>seq1825</b> | Firmicutes    | Clostridia   | 0                  | 0                   | 0                  | 0                   |
| <b>seq1826</b> | Firmicutes    | Clostridia   | 0                  | 0                   | 0                  | 0                   |
| <b>seq1830</b> | Firmicutes    | Clostridia   | 0                  | 0                   | 0                  | 0                   |
| <b>seq1831</b> | Firmicutes    | Clostridia   | 0                  | 0                   | 0                  | 0                   |
| <b>seq1832</b> | Firmicutes    | Clostridia   | 0                  | 0                   | 0                  | 0                   |
| <b>seq1835</b> | Firmicutes    | Clostridia   | 0                  | 0                   | 0                  | 0                   |
| <b>seq1838</b> | Firmicutes    | Clostridia   | 0                  | 0                   | 0                  | 0                   |
| <b>seq1841</b> | Firmicutes    | Clostridia   | 0                  | 0                   | 0                  | 0                   |
| <b>seq1842</b> | Firmicutes    | Clostridia   | 0                  | 0                   | 0                  | 0                   |
| <b>seq1845</b> | Firmicutes    | Clostridia   | 0                  | 0                   | 0                  | 0                   |
| <b>seq1846</b> | Firmicutes    | Clostridia   | 0                  | 0                   | 0                  | 0                   |
| <b>seq1852</b> | Firmicutes    | Clostridia   | 0                  | 0                   | 0                  | 0                   |
| <b>seq1854</b> | Firmicutes    | Clostridia   | 0                  | 0                   | 0                  | 0                   |
| <b>seq1858</b> | Firmicutes    | Clostridia   | 0                  | 0                   | 0                  | 0                   |
| <b>seq1861</b> | Firmicutes    | Clostridia   | 0                  | 0                   | 0                  | 0                   |
| <b>seq1868</b> | Firmicutes    | Clostridia   | 0                  | 0                   | 0                  | 0                   |
| <b>seq1870</b> | Firmicutes    | Clostridia   | 0                  | 0                   | 0                  | 0                   |
| <b>seq1871</b> | Firmicutes    | Clostridia   | 0                  | 0                   | 0                  | 0                   |
| <b>seq1872</b> | Firmicutes    | Clostridia   | 0                  | 0                   | 0                  | 0                   |
| <b>seq1873</b> | Firmicutes    | Clostridia   | 0                  | 0                   | 0                  | 0                   |
| <b>seq1876</b> | Firmicutes    | Clostridia   | 0                  | 0                   | 0                  | 0                   |
| <b>seq1882</b> | Firmicutes    | Clostridia   | 0                  | 0                   | 0                  | 0                   |

Sequence Count Table

|                | <b>Phylum</b> | <b>Class</b> | <b>Subject10WK0</b> | <b>Subject10WK12</b> | <b>Subject22WK0</b> | <b>Subject22WK12</b> |
|----------------|---------------|--------------|---------------------|----------------------|---------------------|----------------------|
| <b>seq1774</b> | Firmicutes    | Clostridia   | 0                   | 0                    | 9                   | 0                    |
| <b>seq1784</b> | Firmicutes    | Clostridia   | 0                   | 0                    | 0                   | 0                    |
| <b>seq1791</b> | Firmicutes    | Clostridia   | 0                   | 0                    | 0                   | 0                    |
| <b>seq1795</b> | Firmicutes    | Clostridia   | 0                   | 0                    | 8                   | 0                    |
| <b>seq1796</b> | Firmicutes    | Clostridia   | 0                   | 0                    | 8                   | 0                    |
| <b>seq1798</b> | Firmicutes    | Clostridia   | 0                   | 0                    | 0                   | 8                    |
| <b>seq1799</b> | Firmicutes    | Clostridia   | 0                   | 0                    | 0                   | 8                    |
| <b>seq1816</b> | Firmicutes    | Clostridia   | 0                   | 0                    | 0                   | 7                    |
| <b>seq1818</b> | Firmicutes    | Clostridia   | 0                   | 0                    | 0                   | 0                    |
| <b>seq1824</b> | Firmicutes    | Clostridia   | 0                   | 0                    | 0                   | 0                    |
| <b>seq1825</b> | Firmicutes    | Clostridia   | 0                   | 0                    | 0                   | 0                    |
| <b>seq1826</b> | Firmicutes    | Clostridia   | 0                   | 0                    | 0                   | 0                    |
| <b>seq1830</b> | Firmicutes    | Clostridia   | 0                   | 0                    | 6                   | 0                    |
| <b>seq1831</b> | Firmicutes    | Clostridia   | 0                   | 0                    | 6                   | 0                    |
| <b>seq1832</b> | Firmicutes    | Clostridia   | 0                   | 0                    | 0                   | 6                    |
| <b>seq1835</b> | Firmicutes    | Clostridia   | 0                   | 0                    | 0                   | 0                    |
| <b>seq1838</b> | Firmicutes    | Clostridia   | 0                   | 0                    | 0                   | 0                    |
| <b>seq1841</b> | Firmicutes    | Clostridia   | 0                   | 0                    | 0                   | 0                    |
| <b>seq1842</b> | Firmicutes    | Clostridia   | 0                   | 0                    | 0                   | 0                    |
| <b>seq1845</b> | Firmicutes    | Clostridia   | 0                   | 0                    | 0                   | 0                    |
| <b>seq1846</b> | Firmicutes    | Clostridia   | 0                   | 0                    | 0                   | 0                    |
| <b>seq1852</b> | Firmicutes    | Clostridia   | 0                   | 0                    | 0                   | 0                    |
| <b>seq1854</b> | Firmicutes    | Clostridia   | 5                   | 0                    | 0                   | 0                    |
| <b>seq1858</b> | Firmicutes    | Clostridia   | 0                   | 0                    | 0                   | 5                    |
| <b>seq1861</b> | Firmicutes    | Clostridia   | 0                   | 0                    | 0                   | 0                    |
| <b>seq1868</b> | Firmicutes    | Clostridia   | 0                   | 0                    | 0                   | 0                    |
| <b>seq1870</b> | Firmicutes    | Clostridia   | 0                   | 0                    | 0                   | 0                    |
| <b>seq1871</b> | Firmicutes    | Clostridia   | 0                   | 0                    | 0                   | 0                    |
| <b>seq1872</b> | Firmicutes    | Clostridia   | 0                   | 0                    | 0                   | 0                    |
| <b>seq1873</b> | Firmicutes    | Clostridia   | 0                   | 0                    | 0                   | 0                    |
| <b>seq1876</b> | Firmicutes    | Clostridia   | 0                   | 0                    | 0                   | 0                    |
| <b>seq1882</b> | Firmicutes    | Clostridia   | 0                   | 0                    | 0                   | 4                    |



Sequence Count Table

|                | <b>Phylum</b> | <b>Class</b> | <b>Subject23WK0</b> | <b>Subject23WK12</b> | <b>Subject24WK0</b> | <b>Subject24WK12</b> |
|----------------|---------------|--------------|---------------------|----------------------|---------------------|----------------------|
| <b>seq1774</b> | Firmicutes    | Clostridia   | 0                   | 0                    | 0                   | 0                    |
| <b>seq1784</b> | Firmicutes    | Clostridia   | 0                   | 0                    | 0                   | 0                    |
| <b>seq1791</b> | Firmicutes    | Clostridia   | 0                   | 0                    | 0                   | 0                    |
| <b>seq1795</b> | Firmicutes    | Clostridia   | 0                   | 0                    | 0                   | 0                    |
| <b>seq1796</b> | Firmicutes    | Clostridia   | 0                   | 0                    | 0                   | 0                    |
| <b>seq1798</b> | Firmicutes    | Clostridia   | 0                   | 0                    | 0                   | 0                    |
| <b>seq1799</b> | Firmicutes    | Clostridia   | 0                   | 0                    | 0                   | 0                    |
| <b>seq1816</b> | Firmicutes    | Clostridia   | 0                   | 0                    | 0                   | 0                    |
| <b>seq1818</b> | Firmicutes    | Clostridia   | 0                   | 0                    | 0                   | 7                    |
| <b>seq1824</b> | Firmicutes    | Clostridia   | 0                   | 0                    | 0                   | 0                    |
| <b>seq1825</b> | Firmicutes    | Clostridia   | 0                   | 0                    | 0                   | 0                    |
| <b>seq1826</b> | Firmicutes    | Clostridia   | 0                   | 0                    | 0                   | 0                    |
| <b>seq1830</b> | Firmicutes    | Clostridia   | 0                   | 0                    | 0                   | 0                    |
| <b>seq1831</b> | Firmicutes    | Clostridia   | 0                   | 0                    | 0                   | 0                    |
| <b>seq1832</b> | Firmicutes    | Clostridia   | 0                   | 0                    | 0                   | 0                    |
| <b>seq1835</b> | Firmicutes    | Clostridia   | 0                   | 0                    | 0                   | 0                    |
| <b>seq1838</b> | Firmicutes    | Clostridia   | 0                   | 0                    | 0                   | 0                    |
| <b>seq1841</b> | Firmicutes    | Clostridia   | 0                   | 0                    | 0                   | 0                    |
| <b>seq1842</b> | Firmicutes    | Clostridia   | 0                   | 0                    | 0                   | 0                    |
| <b>seq1845</b> | Firmicutes    | Clostridia   | 0                   | 0                    | 0                   | 0                    |
| <b>seq1846</b> | Firmicutes    | Clostridia   | 0                   | 0                    | 0                   | 0                    |
| <b>seq1852</b> | Firmicutes    | Clostridia   | 0                   | 0                    | 0                   | 0                    |
| <b>seq1854</b> | Firmicutes    | Clostridia   | 0                   | 0                    | 0                   | 0                    |
| <b>seq1858</b> | Firmicutes    | Clostridia   | 0                   | 0                    | 0                   | 0                    |
| <b>seq1861</b> | Firmicutes    | Clostridia   | 0                   | 5                    | 0                   | 0                    |
| <b>seq1868</b> | Firmicutes    | Clostridia   | 0                   | 0                    | 0                   | 0                    |
| <b>seq1870</b> | Firmicutes    | Clostridia   | 0                   | 0                    | 0                   | 0                    |
| <b>seq1871</b> | Firmicutes    | Clostridia   | 0                   | 0                    | 0                   | 0                    |
| <b>seq1872</b> | Firmicutes    | Clostridia   | 0                   | 0                    | 0                   | 0                    |
| <b>seq1873</b> | Firmicutes    | Clostridia   | 0                   | 0                    | 0                   | 0                    |
| <b>seq1876</b> | Firmicutes    | Clostridia   | 0                   | 0                    | 0                   | 0                    |
| <b>seq1882</b> | Firmicutes    | Clostridia   | 0                   | 0                    | 0                   | 0                    |

Sequence Count Table

|                | <b>Phylum</b> | <b>Class</b> | <b>Subject11WK0</b> | <b>Subject11WK12</b> | <b>Subject12WK0</b> | <b>Subject12WK12</b> |
|----------------|---------------|--------------|---------------------|----------------------|---------------------|----------------------|
| <b>seq1774</b> | Firmicutes    | Clostridia   | 0                   | 0                    | 0                   | 0                    |
| <b>seq1784</b> | Firmicutes    | Clostridia   | 0                   | 0                    | 0                   | 0                    |
| <b>seq1791</b> | Firmicutes    | Clostridia   | 0                   | 0                    | 0                   | 0                    |
| <b>seq1795</b> | Firmicutes    | Clostridia   | 0                   | 0                    | 0                   | 0                    |
| <b>seq1796</b> | Firmicutes    | Clostridia   | 0                   | 0                    | 0                   | 0                    |
| <b>seq1798</b> | Firmicutes    | Clostridia   | 0                   | 0                    | 0                   | 0                    |
| <b>seq1799</b> | Firmicutes    | Clostridia   | 0                   | 0                    | 0                   | 0                    |
| <b>seq1816</b> | Firmicutes    | Clostridia   | 0                   | 0                    | 0                   | 0                    |
| <b>seq1818</b> | Firmicutes    | Clostridia   | 0                   | 0                    | 0                   | 0                    |
| <b>seq1824</b> | Firmicutes    | Clostridia   | 0                   | 0                    | 0                   | 0                    |
| <b>seq1825</b> | Firmicutes    | Clostridia   | 0                   | 0                    | 0                   | 0                    |
| <b>seq1826</b> | Firmicutes    | Clostridia   | 0                   | 0                    | 0                   | 0                    |
| <b>seq1830</b> | Firmicutes    | Clostridia   | 0                   | 0                    | 0                   | 0                    |
| <b>seq1831</b> | Firmicutes    | Clostridia   | 0                   | 0                    | 0                   | 0                    |
| <b>seq1832</b> | Firmicutes    | Clostridia   | 0                   | 0                    | 0                   | 0                    |
| <b>seq1835</b> | Firmicutes    | Clostridia   | 6                   | 0                    | 0                   | 0                    |
| <b>seq1838</b> | Firmicutes    | Clostridia   | 0                   | 0                    | 0                   | 0                    |
| <b>seq1841</b> | Firmicutes    | Clostridia   | 0                   | 0                    | 0                   | 0                    |
| <b>seq1842</b> | Firmicutes    | Clostridia   | 0                   | 0                    | 0                   | 0                    |
| <b>seq1845</b> | Firmicutes    | Clostridia   | 0                   | 0                    | 0                   | 0                    |
| <b>seq1846</b> | Firmicutes    | Clostridia   | 0                   | 0                    | 0                   | 0                    |
| <b>seq1852</b> | Firmicutes    | Clostridia   | 0                   | 0                    | 0                   | 0                    |
| <b>seq1854</b> | Firmicutes    | Clostridia   | 0                   | 0                    | 0                   | 0                    |
| <b>seq1858</b> | Firmicutes    | Clostridia   | 0                   | 0                    | 0                   | 0                    |
| <b>seq1861</b> | Firmicutes    | Clostridia   | 0                   | 0                    | 0                   | 0                    |
| <b>seq1868</b> | Firmicutes    | Clostridia   | 0                   | 0                    | 0                   | 0                    |
| <b>seq1870</b> | Firmicutes    | Clostridia   | 0                   | 0                    | 0                   | 0                    |
| <b>seq1871</b> | Firmicutes    | Clostridia   | 0                   | 0                    | 0                   | 0                    |
| <b>seq1872</b> | Firmicutes    | Clostridia   | 0                   | 0                    | 0                   | 0                    |
| <b>seq1873</b> | Firmicutes    | Clostridia   | 0                   | 0                    | 0                   | 0                    |
| <b>seq1876</b> | Firmicutes    | Clostridia   | 0                   | 0                    | 0                   | 0                    |
| <b>seq1882</b> | Firmicutes    | Clostridia   | 0                   | 0                    | 0                   | 0                    |

Sequence Count Table

|                | <b>Phylum</b> | <b>Class</b> | <b>Subject25WK0</b> | <b>Subject25WK12</b> | <b>Subject38WK0</b> | <b>Subject38WK12</b> |
|----------------|---------------|--------------|---------------------|----------------------|---------------------|----------------------|
| <b>seq1774</b> | Firmicutes    | Clostridia   | 0                   | 0                    | 0                   | 0                    |
| <b>seq1784</b> | Firmicutes    | Clostridia   | 0                   | 0                    | 0                   | 0                    |
| <b>seq1791</b> | Firmicutes    | Clostridia   | 0                   | 0                    | 0                   | 0                    |
| <b>seq1795</b> | Firmicutes    | Clostridia   | 0                   | 0                    | 0                   | 0                    |
| <b>seq1796</b> | Firmicutes    | Clostridia   | 0                   | 0                    | 0                   | 0                    |
| <b>seq1798</b> | Firmicutes    | Clostridia   | 0                   | 0                    | 0                   | 0                    |
| <b>seq1799</b> | Firmicutes    | Clostridia   | 0                   | 0                    | 0                   | 0                    |
| <b>seq1816</b> | Firmicutes    | Clostridia   | 0                   | 0                    | 0                   | 0                    |
| <b>seq1818</b> | Firmicutes    | Clostridia   | 0                   | 0                    | 0                   | 0                    |
| <b>seq1824</b> | Firmicutes    | Clostridia   | 0                   | 0                    | 0                   | 0                    |
| <b>seq1825</b> | Firmicutes    | Clostridia   | 0                   | 0                    | 0                   | 0                    |
| <b>seq1826</b> | Firmicutes    | Clostridia   | 0                   | 0                    | 0                   | 0                    |
| <b>seq1830</b> | Firmicutes    | Clostridia   | 0                   | 0                    | 0                   | 0                    |
| <b>seq1831</b> | Firmicutes    | Clostridia   | 0                   | 0                    | 0                   | 0                    |
| <b>seq1832</b> | Firmicutes    | Clostridia   | 0                   | 0                    | 0                   | 0                    |
| <b>seq1835</b> | Firmicutes    | Clostridia   | 0                   | 0                    | 0                   | 0                    |
| <b>seq1838</b> | Firmicutes    | Clostridia   | 0                   | 0                    | 0                   | 0                    |
| <b>seq1841</b> | Firmicutes    | Clostridia   | 0                   | 0                    | 0                   | 0                    |
| <b>seq1842</b> | Firmicutes    | Clostridia   | 0                   | 0                    | 0                   | 0                    |
| <b>seq1845</b> | Firmicutes    | Clostridia   | 0                   | 0                    | 0                   | 0                    |
| <b>seq1846</b> | Firmicutes    | Clostridia   | 0                   | 0                    | 0                   | 0                    |
| <b>seq1852</b> | Firmicutes    | Clostridia   | 0                   | 0                    | 0                   | 0                    |
| <b>seq1854</b> | Firmicutes    | Clostridia   | 0                   | 0                    | 0                   | 0                    |
| <b>seq1858</b> | Firmicutes    | Clostridia   | 0                   | 0                    | 0                   | 0                    |
| <b>seq1861</b> | Firmicutes    | Clostridia   | 0                   | 0                    | 0                   | 0                    |
| <b>seq1868</b> | Firmicutes    | Clostridia   | 0                   | 0                    | 0                   | 0                    |
| <b>seq1870</b> | Firmicutes    | Clostridia   | 0                   | 0                    | 0                   | 0                    |
| <b>seq1871</b> | Firmicutes    | Clostridia   | 0                   | 0                    | 0                   | 0                    |
| <b>seq1872</b> | Firmicutes    | Clostridia   | 0                   | 0                    | 0                   | 0                    |
| <b>seq1873</b> | Firmicutes    | Clostridia   | 0                   | 0                    | 0                   | 0                    |
| <b>seq1876</b> | Firmicutes    | Clostridia   | 0                   | 2                    | 0                   | 0                    |
| <b>seq1882</b> | Firmicutes    | Clostridia   | 0                   | 0                    | 0                   | 0                    |

Sequence Count Table

|                | <b>Phylum</b> | <b>Class</b> | <b>Subject31WK0</b> | <b>Subject31WK12</b> | <b>Subject32WK0</b> | <b>Subject32WK12</b> |
|----------------|---------------|--------------|---------------------|----------------------|---------------------|----------------------|
| <b>seq1774</b> | Firmicutes    | Clostridia   | 0                   | 0                    | 0                   | 0                    |
| <b>seq1784</b> | Firmicutes    | Clostridia   | 0                   | 0                    | 0                   | 0                    |
| <b>seq1791</b> | Firmicutes    | Clostridia   | 0                   | 0                    | 0                   | 0                    |
| <b>seq1795</b> | Firmicutes    | Clostridia   | 0                   | 0                    | 0                   | 0                    |
| <b>seq1796</b> | Firmicutes    | Clostridia   | 0                   | 0                    | 0                   | 0                    |
| <b>seq1798</b> | Firmicutes    | Clostridia   | 0                   | 0                    | 0                   | 0                    |
| <b>seq1799</b> | Firmicutes    | Clostridia   | 0                   | 0                    | 0                   | 0                    |
| <b>seq1816</b> | Firmicutes    | Clostridia   | 0                   | 0                    | 0                   | 0                    |
| <b>seq1818</b> | Firmicutes    | Clostridia   | 0                   | 0                    | 0                   | 0                    |
| <b>seq1824</b> | Firmicutes    | Clostridia   | 0                   | 0                    | 0                   | 0                    |
| <b>seq1825</b> | Firmicutes    | Clostridia   | 0                   | 0                    | 0                   | 0                    |
| <b>seq1826</b> | Firmicutes    | Clostridia   | 0                   | 0                    | 0                   | 0                    |
| <b>seq1830</b> | Firmicutes    | Clostridia   | 0                   | 0                    | 0                   | 0                    |
| <b>seq1831</b> | Firmicutes    | Clostridia   | 0                   | 0                    | 0                   | 0                    |
| <b>seq1832</b> | Firmicutes    | Clostridia   | 0                   | 0                    | 0                   | 0                    |
| <b>seq1835</b> | Firmicutes    | Clostridia   | 0                   | 0                    | 0                   | 0                    |
| <b>seq1838</b> | Firmicutes    | Clostridia   | 0                   | 0                    | 0                   | 0                    |
| <b>seq1841</b> | Firmicutes    | Clostridia   | 0                   | 0                    | 0                   | 0                    |
| <b>seq1842</b> | Firmicutes    | Clostridia   | 0                   | 0                    | 0                   | 0                    |
| <b>seq1845</b> | Firmicutes    | Clostridia   | 0                   | 0                    | 0                   | 0                    |
| <b>seq1846</b> | Firmicutes    | Clostridia   | 0                   | 0                    | 0                   | 0                    |
| <b>seq1852</b> | Firmicutes    | Clostridia   | 0                   | 0                    | 0                   | 0                    |
| <b>seq1854</b> | Firmicutes    | Clostridia   | 0                   | 0                    | 0                   | 0                    |
| <b>seq1858</b> | Firmicutes    | Clostridia   | 0                   | 0                    | 0                   | 0                    |
| <b>seq1861</b> | Firmicutes    | Clostridia   | 0                   | 0                    | 0                   | 0                    |
| <b>seq1868</b> | Firmicutes    | Clostridia   | 0                   | 0                    | 0                   | 0                    |
| <b>seq1870</b> | Firmicutes    | Clostridia   | 0                   | 0                    | 0                   | 0                    |
| <b>seq1871</b> | Firmicutes    | Clostridia   | 0                   | 0                    | 0                   | 0                    |
| <b>seq1872</b> | Firmicutes    | Clostridia   | 0                   | 0                    | 0                   | 0                    |
| <b>seq1873</b> | Firmicutes    | Clostridia   | 0                   | 0                    | 0                   | 0                    |
| <b>seq1876</b> | Firmicutes    | Clostridia   | 0                   | 0                    | 0                   | 0                    |
| <b>seq1882</b> | Firmicutes    | Clostridia   | 0                   | 0                    | 0                   | 0                    |

Sequence Count Table

|                | <b>Phylum</b> | <b>Class</b> | <b>Subject13WK0</b> | <b>Subject13WK12</b> | <b>Subject39WK0</b> | <b>Subject39WK12</b> |
|----------------|---------------|--------------|---------------------|----------------------|---------------------|----------------------|
| <b>seq1774</b> | Firmicutes    | Clostridia   | 0                   | 0                    | 0                   | 0                    |
| <b>seq1784</b> | Firmicutes    | Clostridia   | 0                   | 0                    | 0                   | 0                    |
| <b>seq1791</b> | Firmicutes    | Clostridia   | 0                   | 0                    | 0                   | 0                    |
| <b>seq1795</b> | Firmicutes    | Clostridia   | 0                   | 0                    | 0                   | 0                    |
| <b>seq1796</b> | Firmicutes    | Clostridia   | 0                   | 0                    | 0                   | 0                    |
| <b>seq1798</b> | Firmicutes    | Clostridia   | 0                   | 0                    | 0                   | 0                    |
| <b>seq1799</b> | Firmicutes    | Clostridia   | 0                   | 0                    | 0                   | 0                    |
| <b>seq1816</b> | Firmicutes    | Clostridia   | 0                   | 0                    | 0                   | 0                    |
| <b>seq1818</b> | Firmicutes    | Clostridia   | 0                   | 0                    | 0                   | 0                    |
| <b>seq1824</b> | Firmicutes    | Clostridia   | 0                   | 0                    | 0                   | 0                    |
| <b>seq1825</b> | Firmicutes    | Clostridia   | 0                   | 0                    | 0                   | 0                    |
| <b>seq1826</b> | Firmicutes    | Clostridia   | 0                   | 0                    | 0                   | 0                    |
| <b>seq1830</b> | Firmicutes    | Clostridia   | 0                   | 0                    | 0                   | 0                    |
| <b>seq1831</b> | Firmicutes    | Clostridia   | 0                   | 0                    | 0                   | 0                    |
| <b>seq1832</b> | Firmicutes    | Clostridia   | 0                   | 0                    | 0                   | 0                    |
| <b>seq1835</b> | Firmicutes    | Clostridia   | 0                   | 0                    | 0                   | 0                    |
| <b>seq1838</b> | Firmicutes    | Clostridia   | 0                   | 6                    | 0                   | 0                    |
| <b>seq1841</b> | Firmicutes    | Clostridia   | 0                   | 0                    | 0                   | 0                    |
| <b>seq1842</b> | Firmicutes    | Clostridia   | 0                   | 0                    | 0                   | 0                    |
| <b>seq1845</b> | Firmicutes    | Clostridia   | 0                   | 0                    | 0                   | 0                    |
| <b>seq1846</b> | Firmicutes    | Clostridia   | 0                   | 0                    | 0                   | 0                    |
| <b>seq1852</b> | Firmicutes    | Clostridia   | 0                   | 0                    | 0                   | 0                    |
| <b>seq1854</b> | Firmicutes    | Clostridia   | 0                   | 0                    | 0                   | 0                    |
| <b>seq1858</b> | Firmicutes    | Clostridia   | 0                   | 0                    | 0                   | 0                    |
| <b>seq1861</b> | Firmicutes    | Clostridia   | 0                   | 0                    | 0                   | 0                    |
| <b>seq1868</b> | Firmicutes    | Clostridia   | 5                   | 0                    | 0                   | 0                    |
| <b>seq1870</b> | Firmicutes    | Clostridia   | 5                   | 0                    | 0                   | 0                    |
| <b>seq1871</b> | Firmicutes    | Clostridia   | 0                   | 5                    | 0                   | 0                    |
| <b>seq1872</b> | Firmicutes    | Clostridia   | 0                   | 5                    | 0                   | 0                    |
| <b>seq1873</b> | Firmicutes    | Clostridia   | 0                   | 0                    | 0                   | 0                    |
| <b>seq1876</b> | Firmicutes    | Clostridia   | 0                   | 0                    | 0                   | 0                    |
| <b>seq1882</b> | Firmicutes    | Clostridia   | 0                   | 0                    | 0                   | 0                    |

Sequence Count Table

|                | <b>Phylum</b> | <b>Class</b> | <b>Subject26WK0</b> | <b>Subject26WK12</b> | <b>Subject14WK0</b> | <b>Subject14WK12</b> |
|----------------|---------------|--------------|---------------------|----------------------|---------------------|----------------------|
| <b>seq1774</b> | Firmicutes    | Clostridia   | 0                   | 0                    | 0                   | 0                    |
| <b>seq1784</b> | Firmicutes    | Clostridia   | 0                   | 0                    | 0                   | 0                    |
| <b>seq1791</b> | Firmicutes    | Clostridia   | 0                   | 0                    | 0                   | 0                    |
| <b>seq1795</b> | Firmicutes    | Clostridia   | 0                   | 0                    | 0                   | 0                    |
| <b>seq1796</b> | Firmicutes    | Clostridia   | 0                   | 0                    | 0                   | 0                    |
| <b>seq1798</b> | Firmicutes    | Clostridia   | 0                   | 0                    | 0                   | 0                    |
| <b>seq1799</b> | Firmicutes    | Clostridia   | 0                   | 0                    | 0                   | 0                    |
| <b>seq1816</b> | Firmicutes    | Clostridia   | 0                   | 0                    | 0                   | 0                    |
| <b>seq1818</b> | Firmicutes    | Clostridia   | 0                   | 0                    | 0                   | 0                    |
| <b>seq1824</b> | Firmicutes    | Clostridia   | 0                   | 0                    | 0                   | 0                    |
| <b>seq1825</b> | Firmicutes    | Clostridia   | 0                   | 0                    | 0                   | 0                    |
| <b>seq1826</b> | Firmicutes    | Clostridia   | 0                   | 0                    | 0                   | 0                    |
| <b>seq1830</b> | Firmicutes    | Clostridia   | 0                   | 0                    | 0                   | 0                    |
| <b>seq1831</b> | Firmicutes    | Clostridia   | 0                   | 0                    | 0                   | 0                    |
| <b>seq1832</b> | Firmicutes    | Clostridia   | 0                   | 0                    | 0                   | 0                    |
| <b>seq1835</b> | Firmicutes    | Clostridia   | 0                   | 0                    | 0                   | 0                    |
| <b>seq1838</b> | Firmicutes    | Clostridia   | 0                   | 0                    | 0                   | 0                    |
| <b>seq1841</b> | Firmicutes    | Clostridia   | 6                   | 0                    | 0                   | 0                    |
| <b>seq1842</b> | Firmicutes    | Clostridia   | 0                   | 0                    | 0                   | 0                    |
| <b>seq1845</b> | Firmicutes    | Clostridia   | 0                   | 0                    | 0                   | 0                    |
| <b>seq1846</b> | Firmicutes    | Clostridia   | 0                   | 0                    | 0                   | 0                    |
| <b>seq1852</b> | Firmicutes    | Clostridia   | 0                   | 0                    | 0                   | 0                    |
| <b>seq1854</b> | Firmicutes    | Clostridia   | 0                   | 0                    | 0                   | 0                    |
| <b>seq1858</b> | Firmicutes    | Clostridia   | 0                   | 0                    | 0                   | 0                    |
| <b>seq1861</b> | Firmicutes    | Clostridia   | 0                   | 0                    | 0                   | 0                    |
| <b>seq1868</b> | Firmicutes    | Clostridia   | 0                   | 0                    | 0                   | 0                    |
| <b>seq1870</b> | Firmicutes    | Clostridia   | 0                   | 0                    | 0                   | 0                    |
| <b>seq1871</b> | Firmicutes    | Clostridia   | 0                   | 0                    | 0                   | 0                    |
| <b>seq1872</b> | Firmicutes    | Clostridia   | 0                   | 0                    | 0                   | 0                    |
| <b>seq1873</b> | Firmicutes    | Clostridia   | 0                   | 0                    | 0                   | 0                    |
| <b>seq1876</b> | Firmicutes    | Clostridia   | 0                   | 0                    | 0                   | 0                    |
| <b>seq1882</b> | Firmicutes    | Clostridia   | 0                   | 0                    | 0                   | 0                    |

Sequence Count Table

|                | <b>Phylum</b> | <b>Class</b> | <b>Subject27WK0</b> | <b>Subject27WK12</b> | <b>Subject15WK0</b> | <b>Subject15WK12</b> |
|----------------|---------------|--------------|---------------------|----------------------|---------------------|----------------------|
| <b>seq1774</b> | Firmicutes    | Clostridia   | 0                   | 0                    | 0                   | 0                    |
| <b>seq1784</b> | Firmicutes    | Clostridia   | 0                   | 0                    | 0                   | 0                    |
| <b>seq1791</b> | Firmicutes    | Clostridia   | 0                   | 0                    | 0                   | 0                    |
| <b>seq1795</b> | Firmicutes    | Clostridia   | 0                   | 0                    | 0                   | 0                    |
| <b>seq1796</b> | Firmicutes    | Clostridia   | 0                   | 0                    | 0                   | 0                    |
| <b>seq1798</b> | Firmicutes    | Clostridia   | 0                   | 0                    | 0                   | 0                    |
| <b>seq1799</b> | Firmicutes    | Clostridia   | 0                   | 0                    | 0                   | 0                    |
| <b>seq1816</b> | Firmicutes    | Clostridia   | 0                   | 0                    | 0                   | 0                    |
| <b>seq1818</b> | Firmicutes    | Clostridia   | 0                   | 0                    | 0                   | 0                    |
| <b>seq1824</b> | Firmicutes    | Clostridia   | 0                   | 0                    | 0                   | 0                    |
| <b>seq1825</b> | Firmicutes    | Clostridia   | 0                   | 0                    | 0                   | 0                    |
| <b>seq1826</b> | Firmicutes    | Clostridia   | 0                   | 0                    | 0                   | 0                    |
| <b>seq1830</b> | Firmicutes    | Clostridia   | 0                   | 0                    | 0                   | 0                    |
| <b>seq1831</b> | Firmicutes    | Clostridia   | 0                   | 0                    | 0                   | 0                    |
| <b>seq1832</b> | Firmicutes    | Clostridia   | 0                   | 0                    | 0                   | 0                    |
| <b>seq1835</b> | Firmicutes    | Clostridia   | 0                   | 0                    | 0                   | 0                    |
| <b>seq1838</b> | Firmicutes    | Clostridia   | 0                   | 0                    | 0                   | 0                    |
| <b>seq1841</b> | Firmicutes    | Clostridia   | 0                   | 0                    | 0                   | 0                    |
| <b>seq1842</b> | Firmicutes    | Clostridia   | 6                   | 0                    | 0                   | 0                    |
| <b>seq1845</b> | Firmicutes    | Clostridia   | 0                   | 0                    | 0                   | 0                    |
| <b>seq1846</b> | Firmicutes    | Clostridia   | 0                   | 0                    | 0                   | 0                    |
| <b>seq1852</b> | Firmicutes    | Clostridia   | 0                   | 0                    | 0                   | 0                    |
| <b>seq1854</b> | Firmicutes    | Clostridia   | 0                   | 0                    | 0                   | 0                    |
| <b>seq1858</b> | Firmicutes    | Clostridia   | 0                   | 0                    | 0                   | 0                    |
| <b>seq1861</b> | Firmicutes    | Clostridia   | 0                   | 0                    | 0                   | 0                    |
| <b>seq1868</b> | Firmicutes    | Clostridia   | 0                   | 0                    | 0                   | 0                    |
| <b>seq1870</b> | Firmicutes    | Clostridia   | 0                   | 0                    | 0                   | 0                    |
| <b>seq1871</b> | Firmicutes    | Clostridia   | 0                   | 0                    | 0                   | 0                    |
| <b>seq1872</b> | Firmicutes    | Clostridia   | 0                   | 0                    | 0                   | 0                    |
| <b>seq1873</b> | Firmicutes    | Clostridia   | 0                   | 0                    | 0                   | 0                    |
| <b>seq1876</b> | Firmicutes    | Clostridia   | 0                   | 0                    | 0                   | 0                    |
| <b>seq1882</b> | Firmicutes    | Clostridia   | 0                   | 0                    | 0                   | 0                    |

Sequence Count Table

|                | <b>Phylum</b> | <b>Class</b> | <b>Δ</b> |  |  |  |
|----------------|---------------|--------------|----------|--|--|--|
| <b>seq1774</b> | Firmicutes    | Clostridia   |          |  |  |  |
| <b>seq1784</b> | Firmicutes    | Clostridia   |          |  |  |  |
| <b>seq1791</b> | Firmicutes    | Clostridia   |          |  |  |  |
| <b>seq1795</b> | Firmicutes    | Clostridia   |          |  |  |  |
| <b>seq1796</b> | Firmicutes    | Clostridia   |          |  |  |  |
| <b>seq1798</b> | Firmicutes    | Clostridia   |          |  |  |  |
| <b>seq1799</b> | Firmicutes    | Clostridia   |          |  |  |  |
| <b>seq1816</b> | Firmicutes    | Clostridia   |          |  |  |  |
| <b>seq1818</b> | Firmicutes    | Clostridia   |          |  |  |  |
| <b>seq1824</b> | Firmicutes    | Clostridia   |          |  |  |  |
| <b>seq1825</b> | Firmicutes    | Clostridia   |          |  |  |  |
| <b>seq1826</b> | Firmicutes    | Clostridia   |          |  |  |  |
| <b>seq1830</b> | Firmicutes    | Clostridia   |          |  |  |  |
| <b>seq1831</b> | Firmicutes    | Clostridia   |          |  |  |  |
| <b>seq1832</b> | Firmicutes    | Clostridia   |          |  |  |  |
| <b>seq1835</b> | Firmicutes    | Clostridia   |          |  |  |  |
| <b>seq1838</b> | Firmicutes    | Clostridia   |          |  |  |  |
| <b>seq1841</b> | Firmicutes    | Clostridia   |          |  |  |  |
| <b>seq1842</b> | Firmicutes    | Clostridia   |          |  |  |  |
| <b>seq1845</b> | Firmicutes    | Clostridia   |          |  |  |  |
| <b>seq1846</b> | Firmicutes    | Clostridia   |          |  |  |  |
| <b>seq1852</b> | Firmicutes    | Clostridia   |          |  |  |  |
| <b>seq1854</b> | Firmicutes    | Clostridia   |          |  |  |  |
| <b>seq1858</b> | Firmicutes    | Clostridia   |          |  |  |  |
| <b>seq1861</b> | Firmicutes    | Clostridia   |          |  |  |  |
| <b>seq1868</b> | Firmicutes    | Clostridia   |          |  |  |  |
| <b>seq1870</b> | Firmicutes    | Clostridia   |          |  |  |  |
| <b>seq1871</b> | Firmicutes    | Clostridia   |          |  |  |  |
| <b>seq1872</b> | Firmicutes    | Clostridia   |          |  |  |  |
| <b>seq1873</b> | Firmicutes    | Clostridia   |          |  |  |  |
| <b>seq1876</b> | Firmicutes    | Clostridia   |          |  |  |  |
| <b>seq1882</b> | Firmicutes    | Clostridia   |          |  |  |  |



Sequence Count Table

|                | <b>Phylum</b> | <b>Class</b>  | <b>Order</b>    | <b>Family</b>       |
|----------------|---------------|---------------|-----------------|---------------------|
| <b>seq1883</b> | Firmicutes    | Clostridia    | Clostridiales   | Ruminococcaceae     |
| <b>seq1890</b> | Firmicutes    | Clostridia    | Clostridiales   | Ruminococcaceae     |
| <b>seq1894</b> | Firmicutes    | Clostridia    | Clostridiales   | Ruminococcaceae     |
| <b>seq1905</b> | Firmicutes    | Clostridia    | Clostridiales   | Ruminococcaceae     |
| <b>seq1855</b> | Firmicutes    | Bacilli       | Bacillales      | Staphylococcaceae   |
| <b>seq1866</b> | Firmicutes    | Bacilli       | Bacillales      | Staphylococcaceae   |
| <b>seq518</b>  | Firmicutes    | Bacilli       | Lactobacillales | Streptococcaceae    |
| <b>seq32</b>   | Firmicutes    | Bacilli       | Lactobacillales | Streptococcaceae    |
| <b>seq147</b>  | Firmicutes    | Bacilli       | Lactobacillales | Streptococcaceae    |
| <b>seq193</b>  | Firmicutes    | Bacilli       | Lactobacillales | Streptococcaceae    |
| <b>seq463</b>  | Firmicutes    | Bacilli       | Lactobacillales | Streptococcaceae    |
| <b>seq548</b>  | Firmicutes    | Bacilli       | Lactobacillales | Streptococcaceae    |
| <b>seq647</b>  | Firmicutes    | Bacilli       | Lactobacillales | Streptococcaceae    |
| <b>seq723</b>  | Firmicutes    | Bacilli       | Lactobacillales | Streptococcaceae    |
| <b>seq1034</b> | Firmicutes    | Bacilli       | Lactobacillales | Streptococcaceae    |
| <b>seq1347</b> | Firmicutes    | Bacilli       | Lactobacillales | Streptococcaceae    |
| <b>seq1521</b> | Firmicutes    | Bacilli       | Lactobacillales | Streptococcaceae    |
| <b>seq1644</b> | Firmicutes    | Bacilli       | Lactobacillales | Streptococcaceae    |
| <b>seq1787</b> | Firmicutes    | Bacilli       | Lactobacillales | Streptococcaceae    |
| <b>seq1775</b> | Firmicutes    | Clostridia    | Clostridiales   | Syntrophomonadaceae |
| <b>seq1878</b> | Firmicutes    | Clostridia    | Clostridiales   | Syntrophomonadaceae |
| <b>seq341</b>  | Firmicutes    | Negativicutes | Selenomonadales | Veillonellaceae     |
| <b>seq832</b>  | Firmicutes    | Negativicutes | Selenomonadales | Veillonellaceae     |
| <b>seq60</b>   | Firmicutes    | Negativicutes | Selenomonadales | Veillonellaceae     |
| <b>seq462</b>  | Firmicutes    | Negativicutes | Selenomonadales | Veillonellaceae     |
| <b>seq1416</b> | Firmicutes    | Negativicutes | Selenomonadales | Veillonellaceae     |
| <b>seq1655</b> | Firmicutes    | Negativicutes | Selenomonadales | Veillonellaceae     |
| <b>seq61</b>   | Firmicutes    | Negativicutes | Selenomonadales | Veillonellaceae     |
| <b>seq40</b>   | Firmicutes    | Negativicutes | Selenomonadales | Veillonellaceae     |
| <b>seq163</b>  | Firmicutes    | Negativicutes | Selenomonadales | Veillonellaceae     |
| <b>seq444</b>  | Firmicutes    | Negativicutes | Selenomonadales | Veillonellaceae     |
| <b>seq494</b>  | Firmicutes    | Negativicutes | Selenomonadales | Veillonellaceae     |

Sequence Count Table

|                | <b>Phylum</b> | <b>Class</b>  | <b>Genus</b>    | <b>Species</b>    |
|----------------|---------------|---------------|-----------------|-------------------|
| <b>seq1883</b> | Firmicutes    | Clostridia    |                 |                   |
| <b>seq1890</b> | Firmicutes    | Clostridia    |                 |                   |
| <b>seq1894</b> | Firmicutes    | Clostridia    |                 |                   |
| <b>seq1905</b> | Firmicutes    | Clostridia    |                 |                   |
| <b>seq1855</b> | Firmicutes    | Bacilli       | Nosocomiicoccus |                   |
| <b>seq1866</b> | Firmicutes    | Bacilli       | Staphylococcus  |                   |
| <b>seq518</b>  | Firmicutes    | Bacilli       | Lactococcus     |                   |
| <b>seq32</b>   | Firmicutes    | Bacilli       | Streptococcus   |                   |
| <b>seq147</b>  | Firmicutes    | Bacilli       | Streptococcus   |                   |
| <b>seq193</b>  | Firmicutes    | Bacilli       | Streptococcus   |                   |
| <b>seq463</b>  | Firmicutes    | Bacilli       | Streptococcus   |                   |
| <b>seq548</b>  | Firmicutes    | Bacilli       | Streptococcus   |                   |
| <b>seq647</b>  | Firmicutes    | Bacilli       | Streptococcus   | mutans            |
| <b>seq723</b>  | Firmicutes    | Bacilli       | Streptococcus   |                   |
| <b>seq1034</b> | Firmicutes    | Bacilli       | Streptococcus   |                   |
| <b>seq1347</b> | Firmicutes    | Bacilli       | Streptococcus   | anginosus         |
| <b>seq1521</b> | Firmicutes    | Bacilli       | Streptococcus   |                   |
| <b>seq1644</b> | Firmicutes    | Bacilli       | Streptococcus   |                   |
| <b>seq1787</b> | Firmicutes    | Bacilli       | Streptococcus   |                   |
| <b>seq1775</b> | Firmicutes    | Clostridia    |                 |                   |
| <b>seq1878</b> | Firmicutes    | Clostridia    |                 |                   |
| <b>seq341</b>  | Firmicutes    | Negativicutes | Allisonella     | histaminiformans  |
| <b>seq832</b>  | Firmicutes    | Negativicutes | Allisonella     |                   |
| <b>seq60</b>   | Firmicutes    | Negativicutes | Dialister       | invisus           |
| <b>seq462</b>  | Firmicutes    | Negativicutes | Dialister       |                   |
| <b>seq1416</b> | Firmicutes    | Negativicutes | Dialister       | propionicifaciens |
| <b>seq1655</b> | Firmicutes    | Negativicutes | Dialister       |                   |
| <b>seq61</b>   | Firmicutes    | Negativicutes | Megasphaera     | funiformis        |
| <b>seq40</b>   | Firmicutes    | Negativicutes | Megasphaera     | massiliensis      |
| <b>seq163</b>  | Firmicutes    | Negativicutes | Megasphaera     |                   |
| <b>seq444</b>  | Firmicutes    | Negativicutes | Megasphaera     |                   |
| <b>seq494</b>  | Firmicutes    | Negativicutes | Megasphaera     |                   |

Sequence Count Table

|                | <b>Phylum</b> | <b>Class</b>  | <b>Subject34WK0</b> | <b>Subject34WK12</b> | <b>Subject16WK0</b> | <b>Subject16WK12</b> |
|----------------|---------------|---------------|---------------------|----------------------|---------------------|----------------------|
| <b>seq1883</b> | Firmicutes    | Clostridia    | 0                   | 0                    | 0                   | 0                    |
| <b>seq1890</b> | Firmicutes    | Clostridia    | 0                   | 0                    | 0                   | 0                    |
| <b>seq1894</b> | Firmicutes    | Clostridia    | 0                   | 0                    | 0                   | 0                    |
| <b>seq1905</b> | Firmicutes    | Clostridia    | 0                   | 0                    | 0                   | 0                    |
| <b>seq1855</b> | Firmicutes    | Bacilli       | 0                   | 0                    | 0                   | 0                    |
| <b>seq1866</b> | Firmicutes    | Bacilli       | 0                   | 0                    | 0                   | 0                    |
| <b>seq518</b>  | Firmicutes    | Bacilli       | 27                  | 53                   | 0                   | 27                   |
| <b>seq32</b>   | Firmicutes    | Bacilli       | 788                 | 5676                 | 688                 | 71                   |
| <b>seq147</b>  | Firmicutes    | Bacilli       | 180                 | 901                  | 320                 | 25                   |
| <b>seq193</b>  | Firmicutes    | Bacilli       | 0                   | 0                    | 0                   | 0                    |
| <b>seq463</b>  | Firmicutes    | Bacilli       | 0                   | 24                   | 31                  | 0                    |
| <b>seq548</b>  | Firmicutes    | Bacilli       | 0                   | 28                   | 0                   | 0                    |
| <b>seq647</b>  | Firmicutes    | Bacilli       | 7                   | 53                   | 10                  | 0                    |
| <b>seq723</b>  | Firmicutes    | Bacilli       | 0                   | 98                   | 0                   | 0                    |
| <b>seq1034</b> | Firmicutes    | Bacilli       | 0                   | 0                    | 0                   | 0                    |
| <b>seq1347</b> | Firmicutes    | Bacilli       | 0                   | 0                    | 0                   | 0                    |
| <b>seq1521</b> | Firmicutes    | Bacilli       | 0                   | 0                    | 26                  | 0                    |
| <b>seq1644</b> | Firmicutes    | Bacilli       | 0                   | 0                    | 0                   | 0                    |
| <b>seq1787</b> | Firmicutes    | Bacilli       | 0                   | 0                    | 0                   | 0                    |
| <b>seq1775</b> | Firmicutes    | Clostridia    | 0                   | 0                    | 0                   | 0                    |
| <b>seq1878</b> | Firmicutes    | Clostridia    | 0                   | 0                    | 0                   | 0                    |
| <b>seq341</b>  | Firmicutes    | Negativicutes | 0                   | 240                  | 204                 | 57                   |
| <b>seq832</b>  | Firmicutes    | Negativicutes | 0                   | 0                    | 0                   | 0                    |
| <b>seq60</b>   | Firmicutes    | Negativicutes | 0                   | 0                    | 0                   | 0                    |
| <b>seq462</b>  | Firmicutes    | Negativicutes | 0                   | 0                    | 0                   | 0                    |
| <b>seq1416</b> | Firmicutes    | Negativicutes | 0                   | 0                    | 0                   | 0                    |
| <b>seq1655</b> | Firmicutes    | Negativicutes | 0                   | 0                    | 0                   | 0                    |
| <b>seq61</b>   | Firmicutes    | Negativicutes | 0                   | 0                    | 0                   | 0                    |
| <b>seq40</b>   | Firmicutes    | Negativicutes | 956                 | 8237                 | 0                   | 0                    |
| <b>seq163</b>  | Firmicutes    | Negativicutes | 0                   | 0                    | 0                   | 0                    |
| <b>seq444</b>  | Firmicutes    | Negativicutes | 0                   | 0                    | 0                   | 0                    |
| <b>seq494</b>  | Firmicutes    | Negativicutes | 0                   | 0                    | 0                   | 0                    |

Sequence Count Table

|                | <b>Phylum</b> | <b>Class</b>  | <b>Subject17WK0</b> | <b>Subject17WK12</b> | <b>Subject1WK0</b> | <b>Subject1WK12</b> |
|----------------|---------------|---------------|---------------------|----------------------|--------------------|---------------------|
| <b>seq1883</b> | Firmicutes    | Clostridia    | 0                   | 0                    | 0                  | 0                   |
| <b>seq1890</b> | Firmicutes    | Clostridia    | 0                   | 0                    | 0                  | 0                   |
| <b>seq1894</b> | Firmicutes    | Clostridia    | 0                   | 0                    | 0                  | 0                   |
| <b>seq1905</b> | Firmicutes    | Clostridia    | 0                   | 0                    | 0                  | 0                   |
| <b>seq1855</b> | Firmicutes    | Bacilli       | 0                   | 0                    | 0                  | 0                   |
| <b>seq1866</b> | Firmicutes    | Bacilli       | 0                   | 0                    | 0                  | 0                   |
| <b>seq518</b>  | Firmicutes    | Bacilli       | 0                   | 0                    | 27                 | 35                  |
| <b>seq32</b>   | Firmicutes    | Bacilli       | 38                  | 339                  | 315                | 237                 |
| <b>seq147</b>  | Firmicutes    | Bacilli       | 0                   | 0                    | 32                 | 24                  |
| <b>seq193</b>  | Firmicutes    | Bacilli       | 0                   | 0                    | 0                  | 0                   |
| <b>seq463</b>  | Firmicutes    | Bacilli       | 0                   | 0                    | 0                  | 0                   |
| <b>seq548</b>  | Firmicutes    | Bacilli       | 0                   | 0                    | 0                  | 0                   |
| <b>seq647</b>  | Firmicutes    | Bacilli       | 0                   | 0                    | 0                  | 0                   |
| <b>seq723</b>  | Firmicutes    | Bacilli       | 0                   | 0                    | 0                  | 0                   |
| <b>seq1034</b> | Firmicutes    | Bacilli       | 0                   | 0                    | 0                  | 0                   |
| <b>seq1347</b> | Firmicutes    | Bacilli       | 0                   | 0                    | 0                  | 0                   |
| <b>seq1521</b> | Firmicutes    | Bacilli       | 0                   | 0                    | 0                  | 0                   |
| <b>seq1644</b> | Firmicutes    | Bacilli       | 0                   | 0                    | 0                  | 0                   |
| <b>seq1787</b> | Firmicutes    | Bacilli       | 0                   | 0                    | 0                  | 0                   |
| <b>seq1775</b> | Firmicutes    | Clostridia    | 0                   | 0                    | 0                  | 0                   |
| <b>seq1878</b> | Firmicutes    | Clostridia    | 0                   | 0                    | 0                  | 0                   |
| <b>seq341</b>  | Firmicutes    | Negativicutes | 33                  | 64                   | 61                 | 63                  |
| <b>seq832</b>  | Firmicutes    | Negativicutes | 0                   | 0                    | 0                  | 0                   |
| <b>seq60</b>   | Firmicutes    | Negativicutes | 0                   | 0                    | 0                  | 0                   |
| <b>seq462</b>  | Firmicutes    | Negativicutes | 0                   | 0                    | 0                  | 0                   |
| <b>seq1416</b> | Firmicutes    | Negativicutes | 0                   | 0                    | 0                  | 0                   |
| <b>seq1655</b> | Firmicutes    | Negativicutes | 0                   | 0                    | 0                  | 0                   |
| <b>seq61</b>   | Firmicutes    | Negativicutes | 0                   | 0                    | 0                  | 0                   |
| <b>seq40</b>   | Firmicutes    | Negativicutes | 0                   | 0                    | 0                  | 0                   |
| <b>seq163</b>  | Firmicutes    | Negativicutes | 0                   | 0                    | 0                  | 0                   |
| <b>seq444</b>  | Firmicutes    | Negativicutes | 0                   | 0                    | 428                | 587                 |
| <b>seq494</b>  | Firmicutes    | Negativicutes | 0                   | 0                    | 0                  | 0                   |

Sequence Count Table

|                | <b>Phylum</b> | <b>Class</b>  | <b>Subject2WK0</b> | <b>Subject2WK12</b> | <b>Subject3WK0</b> | <b>Subject3WK12</b> |
|----------------|---------------|---------------|--------------------|---------------------|--------------------|---------------------|
| <b>seq1883</b> | Firmicutes    | Clostridia    | 0                  | 0                   | 0                  | 0                   |
| <b>seq1890</b> | Firmicutes    | Clostridia    | 0                  | 0                   | 0                  | 0                   |
| <b>seq1894</b> | Firmicutes    | Clostridia    | 0                  | 0                   | 0                  | 0                   |
| <b>seq1905</b> | Firmicutes    | Clostridia    | 0                  | 0                   | 0                  | 0                   |
| <b>seq1855</b> | Firmicutes    | Bacilli       | 0                  | 0                   | 0                  | 0                   |
| <b>seq1866</b> | Firmicutes    | Bacilli       | 0                  | 0                   | 0                  | 0                   |
| <b>seq518</b>  | Firmicutes    | Bacilli       | 0                  | 0                   | 65                 | 0                   |
| <b>seq32</b>   | Firmicutes    | Bacilli       | 346                | 78                  | 193                | 79                  |
| <b>seq147</b>  | Firmicutes    | Bacilli       | 293                | 407                 | 227                | 0                   |
| <b>seq193</b>  | Firmicutes    | Bacilli       | 0                  | 0                   | 0                  | 430                 |
| <b>seq463</b>  | Firmicutes    | Bacilli       | 0                  | 0                   | 0                  | 31                  |
| <b>seq548</b>  | Firmicutes    | Bacilli       | 0                  | 0                   | 0                  | 0                   |
| <b>seq647</b>  | Firmicutes    | Bacilli       | 10                 | 0                   | 0                  | 0                   |
| <b>seq723</b>  | Firmicutes    | Bacilli       | 0                  | 0                   | 0                  | 0                   |
| <b>seq1034</b> | Firmicutes    | Bacilli       | 13                 | 0                   | 0                  | 0                   |
| <b>seq1347</b> | Firmicutes    | Bacilli       | 0                  | 0                   | 0                  | 0                   |
| <b>seq1521</b> | Firmicutes    | Bacilli       | 0                  | 0                   | 0                  | 0                   |
| <b>seq1644</b> | Firmicutes    | Bacilli       | 0                  | 16                  | 0                  | 0                   |
| <b>seq1787</b> | Firmicutes    | Bacilli       | 0                  | 0                   | 8                  | 0                   |
| <b>seq1775</b> | Firmicutes    | Clostridia    | 0                  | 0                   | 0                  | 0                   |
| <b>seq1878</b> | Firmicutes    | Clostridia    | 0                  | 0                   | 0                  | 0                   |
| <b>seq341</b>  | Firmicutes    | Negativicutes | 0                  | 0                   | 0                  | 0                   |
| <b>seq832</b>  | Firmicutes    | Negativicutes | 0                  | 0                   | 0                  | 0                   |
| <b>seq60</b>   | Firmicutes    | Negativicutes | 0                  | 0                   | 135                | 873                 |
| <b>seq462</b>  | Firmicutes    | Negativicutes | 0                  | 0                   | 0                  | 0                   |
| <b>seq1416</b> | Firmicutes    | Negativicutes | 0                  | 0                   | 0                  | 0                   |
| <b>seq1655</b> | Firmicutes    | Negativicutes | 0                  | 0                   | 0                  | 0                   |
| <b>seq61</b>   | Firmicutes    | Negativicutes | 0                  | 0                   | 4215               | 7272                |
| <b>seq40</b>   | Firmicutes    | Negativicutes | 0                  | 0                   | 0                  | 0                   |
| <b>seq163</b>  | Firmicutes    | Negativicutes | 0                  | 0                   | 0                  | 0                   |
| <b>seq444</b>  | Firmicutes    | Negativicutes | 0                  | 0                   | 0                  | 0                   |
| <b>seq494</b>  | Firmicutes    | Negativicutes | 0                  | 0                   | 0                  | 0                   |

Sequence Count Table

|                | <b>Phylum</b> | <b>Class</b>  | <b>Subject4WK0</b> | <b>Subject4WK12</b> | <b>Subject5WK0</b> | <b>Subject5WK12</b> |
|----------------|---------------|---------------|--------------------|---------------------|--------------------|---------------------|
| <b>seq1883</b> | Firmicutes    | Clostridia    | 0                  | 0                   | 0                  | 0                   |
| <b>seq1890</b> | Firmicutes    | Clostridia    | 0                  | 0                   | 0                  | 0                   |
| <b>seq1894</b> | Firmicutes    | Clostridia    | 0                  | 0                   | 0                  | 0                   |
| <b>seq1905</b> | Firmicutes    | Clostridia    | 0                  | 0                   | 0                  | 0                   |
| <b>seq1855</b> | Firmicutes    | Bacilli       | 0                  | 0                   | 0                  | 0                   |
| <b>seq1866</b> | Firmicutes    | Bacilli       | 0                  | 0                   | 0                  | 0                   |
| <b>seq518</b>  | Firmicutes    | Bacilli       | 37                 | 0                   | 0                  | 3                   |
| <b>seq32</b>   | Firmicutes    | Bacilli       | 574                | 196                 | 103                | 660                 |
| <b>seq147</b>  | Firmicutes    | Bacilli       | 57                 | 40                  | 83                 | 39                  |
| <b>seq193</b>  | Firmicutes    | Bacilli       | 0                  | 0                   | 0                  | 0                   |
| <b>seq463</b>  | Firmicutes    | Bacilli       | 0                  | 30                  | 0                  | 0                   |
| <b>seq548</b>  | Firmicutes    | Bacilli       | 0                  | 0                   | 0                  | 0                   |
| <b>seq647</b>  | Firmicutes    | Bacilli       | 0                  | 0                   | 57                 | 0                   |
| <b>seq723</b>  | Firmicutes    | Bacilli       | 0                  | 0                   | 34                 | 82                  |
| <b>seq1034</b> | Firmicutes    | Bacilli       | 0                  | 0                   | 40                 | 62                  |
| <b>seq1347</b> | Firmicutes    | Bacilli       | 0                  | 0                   | 0                  | 0                   |
| <b>seq1521</b> | Firmicutes    | Bacilli       | 0                  | 0                   | 0                  | 0                   |
| <b>seq1644</b> | Firmicutes    | Bacilli       | 0                  | 0                   | 0                  | 0                   |
| <b>seq1787</b> | Firmicutes    | Bacilli       | 0                  | 0                   | 0                  | 0                   |
| <b>seq1775</b> | Firmicutes    | Clostridia    | 0                  | 0                   | 0                  | 0                   |
| <b>seq1878</b> | Firmicutes    | Clostridia    | 0                  | 0                   | 0                  | 0                   |
| <b>seq341</b>  | Firmicutes    | Negativicutes | 0                  | 0                   | 0                  | 0                   |
| <b>seq832</b>  | Firmicutes    | Negativicutes | 0                  | 0                   | 0                  | 0                   |
| <b>seq60</b>   | Firmicutes    | Negativicutes | 943                | 511                 | 333                | 0                   |
| <b>seq462</b>  | Firmicutes    | Negativicutes | 0                  | 0                   | 0                  | 0                   |
| <b>seq1416</b> | Firmicutes    | Negativicutes | 0                  | 0                   | 0                  | 39                  |
| <b>seq1655</b> | Firmicutes    | Negativicutes | 0                  | 0                   | 0                  | 0                   |
| <b>seq61</b>   | Firmicutes    | Negativicutes | 3420               | 11332               | 0                  | 0                   |
| <b>seq40</b>   | Firmicutes    | Negativicutes | 0                  | 0                   | 1733               | 1289                |
| <b>seq163</b>  | Firmicutes    | Negativicutes | 0                  | 0                   | 0                  | 0                   |
| <b>seq444</b>  | Firmicutes    | Negativicutes | 0                  | 0                   | 0                  | 0                   |
| <b>seq494</b>  | Firmicutes    | Negativicutes | 0                  | 0                   | 0                  | 0                   |

Sequence Count Table

|                | <b>Phylum</b> | <b>Class</b>  | <b>Subject6WK0</b> | <b>Subject6WK12</b> | <b>Subject18WK0</b> | <b>Subject18WK12</b> |
|----------------|---------------|---------------|--------------------|---------------------|---------------------|----------------------|
| <b>seq1883</b> | Firmicutes    | Clostridia    | 0                  | 0                   | 0                   | 0                    |
| <b>seq1890</b> | Firmicutes    | Clostridia    | 0                  | 0                   | 0                   | 0                    |
| <b>seq1894</b> | Firmicutes    | Clostridia    | 0                  | 0                   | 0                   | 0                    |
| <b>seq1905</b> | Firmicutes    | Clostridia    | 0                  | 0                   | 0                   | 0                    |
| <b>seq1855</b> | Firmicutes    | Bacilli       | 0                  | 0                   | 0                   | 0                    |
| <b>seq1866</b> | Firmicutes    | Bacilli       | 0                  | 0                   | 0                   | 0                    |
| <b>seq518</b>  | Firmicutes    | Bacilli       | 5                  | 13                  | 0                   | 0                    |
| <b>seq32</b>   | Firmicutes    | Bacilli       | 29                 | 107                 | 849                 | 70                   |
| <b>seq147</b>  | Firmicutes    | Bacilli       | 0                  | 22                  | 123                 | 32                   |
| <b>seq193</b>  | Firmicutes    | Bacilli       | 0                  | 0                   | 0                   | 0                    |
| <b>seq463</b>  | Firmicutes    | Bacilli       | 0                  | 0                   | 0                   | 0                    |
| <b>seq548</b>  | Firmicutes    | Bacilli       | 0                  | 0                   | 35                  | 0                    |
| <b>seq647</b>  | Firmicutes    | Bacilli       | 0                  | 5                   | 0                   | 0                    |
| <b>seq723</b>  | Firmicutes    | Bacilli       | 0                  | 0                   | 0                   | 0                    |
| <b>seq1034</b> | Firmicutes    | Bacilli       | 0                  | 0                   | 0                   | 0                    |
| <b>seq1347</b> | Firmicutes    | Bacilli       | 0                  | 0                   | 0                   | 0                    |
| <b>seq1521</b> | Firmicutes    | Bacilli       | 0                  | 0                   | 0                   | 0                    |
| <b>seq1644</b> | Firmicutes    | Bacilli       | 0                  | 0                   | 0                   | 0                    |
| <b>seq1787</b> | Firmicutes    | Bacilli       | 0                  | 0                   | 0                   | 0                    |
| <b>seq1775</b> | Firmicutes    | Clostridia    | 0                  | 0                   | 0                   | 0                    |
| <b>seq1878</b> | Firmicutes    | Clostridia    | 0                  | 4                   | 0                   | 0                    |
| <b>seq341</b>  | Firmicutes    | Negativicutes | 37                 | 0                   | 0                   | 0                    |
| <b>seq832</b>  | Firmicutes    | Negativicutes | 0                  | 46                  | 0                   | 0                    |
| <b>seq60</b>   | Firmicutes    | Negativicutes | 0                  | 0                   | 3450                | 3029                 |
| <b>seq462</b>  | Firmicutes    | Negativicutes | 0                  | 0                   | 0                   | 0                    |
| <b>seq1416</b> | Firmicutes    | Negativicutes | 0                  | 0                   | 0                   | 0                    |
| <b>seq1655</b> | Firmicutes    | Negativicutes | 0                  | 0                   | 0                   | 0                    |
| <b>seq61</b>   | Firmicutes    | Negativicutes | 0                  | 0                   | 0                   | 0                    |
| <b>seq40</b>   | Firmicutes    | Negativicutes | 0                  | 0                   | 2376                | 6144                 |
| <b>seq163</b>  | Firmicutes    | Negativicutes | 4428               | 2802                | 0                   | 0                    |
| <b>seq444</b>  | Firmicutes    | Negativicutes | 0                  | 0                   | 0                   | 0                    |
| <b>seq494</b>  | Firmicutes    | Negativicutes | 0                  | 0                   | 226                 | 576                  |

Sequence Count Table

|                | <b>Phylum</b> | <b>Class</b>  | <b>Subject19WK0</b> | <b>Subject19WK12</b> | <b>Subject20WK0</b> | <b>Subject20WK12</b> |
|----------------|---------------|---------------|---------------------|----------------------|---------------------|----------------------|
| <b>seq1883</b> | Firmicutes    | Clostridia    | 0                   | 0                    | 0                   | 0                    |
| <b>seq1890</b> | Firmicutes    | Clostridia    | 0                   | 0                    | 0                   | 0                    |
| <b>seq1894</b> | Firmicutes    | Clostridia    | 0                   | 0                    | 0                   | 0                    |
| <b>seq1905</b> | Firmicutes    | Clostridia    | 0                   | 0                    | 0                   | 0                    |
| <b>seq1855</b> | Firmicutes    | Bacilli       | 0                   | 0                    | 0                   | 0                    |
| <b>seq1866</b> | Firmicutes    | Bacilli       | 0                   | 0                    | 0                   | 0                    |
| <b>seq518</b>  | Firmicutes    | Bacilli       | 0                   | 0                    | 0                   | 0                    |
| <b>seq32</b>   | Firmicutes    | Bacilli       | 2146                | 420                  | 62                  | 1619                 |
| <b>seq147</b>  | Firmicutes    | Bacilli       | 160                 | 143                  | 32                  | 300                  |
| <b>seq193</b>  | Firmicutes    | Bacilli       | 0                   | 0                    | 4197                | 0                    |
| <b>seq463</b>  | Firmicutes    | Bacilli       | 0                   | 0                    | 30                  | 156                  |
| <b>seq548</b>  | Firmicutes    | Bacilli       | 0                   | 0                    | 0                   | 107                  |
| <b>seq647</b>  | Firmicutes    | Bacilli       | 0                   | 0                    | 0                   | 0                    |
| <b>seq723</b>  | Firmicutes    | Bacilli       | 0                   | 0                    | 0                   | 0                    |
| <b>seq1034</b> | Firmicutes    | Bacilli       | 0                   | 0                    | 0                   | 0                    |
| <b>seq1347</b> | Firmicutes    | Bacilli       | 0                   | 0                    | 0                   | 49                   |
| <b>seq1521</b> | Firmicutes    | Bacilli       | 0                   | 0                    | 0                   | 0                    |
| <b>seq1644</b> | Firmicutes    | Bacilli       | 0                   | 0                    | 0                   | 0                    |
| <b>seq1787</b> | Firmicutes    | Bacilli       | 0                   | 0                    | 0                   | 0                    |
| <b>seq1775</b> | Firmicutes    | Clostridia    | 0                   | 0                    | 0                   | 0                    |
| <b>seq1878</b> | Firmicutes    | Clostridia    | 0                   | 0                    | 0                   | 0                    |
| <b>seq341</b>  | Firmicutes    | Negativicutes | 76                  | 288                  | 27                  | 116                  |
| <b>seq832</b>  | Firmicutes    | Negativicutes | 0                   | 0                    | 0                   | 0                    |
| <b>seq60</b>   | Firmicutes    | Negativicutes | 0                   | 0                    | 0                   | 0                    |
| <b>seq462</b>  | Firmicutes    | Negativicutes | 0                   | 0                    | 0                   | 0                    |
| <b>seq1416</b> | Firmicutes    | Negativicutes | 0                   | 0                    | 0                   | 0                    |
| <b>seq1655</b> | Firmicutes    | Negativicutes | 0                   | 0                    | 0                   | 0                    |
| <b>seq61</b>   | Firmicutes    | Negativicutes | 0                   | 0                    | 0                   | 0                    |
| <b>seq40</b>   | Firmicutes    | Negativicutes | 0                   | 0                    | 0                   | 0                    |
| <b>seq163</b>  | Firmicutes    | Negativicutes | 0                   | 0                    | 0                   | 0                    |
| <b>seq444</b>  | Firmicutes    | Negativicutes | 0                   | 0                    | 0                   | 0                    |
| <b>seq494</b>  | Firmicutes    | Negativicutes | 0                   | 0                    | 0                   | 0                    |



Sequence Count Table

|                | <b>Phylum</b> | <b>Class</b>  | <b>Subject7WK0</b> | <b>Subject7WK12</b> | <b>Subject21WK0</b> | <b>Subject21WK12</b> |
|----------------|---------------|---------------|--------------------|---------------------|---------------------|----------------------|
| <b>seq1883</b> | Firmicutes    | Clostridia    | 0                  | 0                   | 0                   | 0                    |
| <b>seq1890</b> | Firmicutes    | Clostridia    | 0                  | 0                   | 0                   | 0                    |
| <b>seq1894</b> | Firmicutes    | Clostridia    | 0                  | 0                   | 0                   | 0                    |
| <b>seq1905</b> | Firmicutes    | Clostridia    | 0                  | 0                   | 0                   | 0                    |
| <b>seq1855</b> | Firmicutes    | Bacilli       | 0                  | 0                   | 0                   | 0                    |
| <b>seq1866</b> | Firmicutes    | Bacilli       | 0                  | 0                   | 0                   | 0                    |
| <b>seq518</b>  | Firmicutes    | Bacilli       | 31                 | 52                  | 0                   | 0                    |
| <b>seq32</b>   | Firmicutes    | Bacilli       | 82                 | 316                 | 55                  | 0                    |
| <b>seq147</b>  | Firmicutes    | Bacilli       | 20                 | 107                 | 56                  | 0                    |
| <b>seq193</b>  | Firmicutes    | Bacilli       | 0                  | 918                 | 0                   | 0                    |
| <b>seq463</b>  | Firmicutes    | Bacilli       | 20                 | 43                  | 35                  | 15                   |
| <b>seq548</b>  | Firmicutes    | Bacilli       | 0                  | 0                   | 0                   | 0                    |
| <b>seq647</b>  | Firmicutes    | Bacilli       | 0                  | 0                   | 0                   | 0                    |
| <b>seq723</b>  | Firmicutes    | Bacilli       | 0                  | 0                   | 0                   | 0                    |
| <b>seq1034</b> | Firmicutes    | Bacilli       | 0                  | 0                   | 0                   | 0                    |
| <b>seq1347</b> | Firmicutes    | Bacilli       | 0                  | 0                   | 0                   | 0                    |
| <b>seq1521</b> | Firmicutes    | Bacilli       | 0                  | 0                   | 0                   | 0                    |
| <b>seq1644</b> | Firmicutes    | Bacilli       | 0                  | 0                   | 0                   | 0                    |
| <b>seq1787</b> | Firmicutes    | Bacilli       | 0                  | 0                   | 0                   | 0                    |
| <b>seq1775</b> | Firmicutes    | Clostridia    | 0                  | 0                   | 0                   | 0                    |
| <b>seq1878</b> | Firmicutes    | Clostridia    | 0                  | 0                   | 0                   | 0                    |
| <b>seq341</b>  | Firmicutes    | Negativicutes | 0                  | 0                   | 0                   | 0                    |
| <b>seq832</b>  | Firmicutes    | Negativicutes | 0                  | 0                   | 0                   | 0                    |
| <b>seq60</b>   | Firmicutes    | Negativicutes | 0                  | 0                   | 2368                | 2624                 |
| <b>seq462</b>  | Firmicutes    | Negativicutes | 0                  | 0                   | 441                 | 501                  |
| <b>seq1416</b> | Firmicutes    | Negativicutes | 0                  | 0                   | 0                   | 0                    |
| <b>seq1655</b> | Firmicutes    | Negativicutes | 0                  | 0                   | 0                   | 0                    |
| <b>seq61</b>   | Firmicutes    | Negativicutes | 0                  | 0                   | 0                   | 0                    |
| <b>seq40</b>   | Firmicutes    | Negativicutes | 0                  | 0                   | 0                   | 0                    |
| <b>seq163</b>  | Firmicutes    | Negativicutes | 0                  | 0                   | 0                   | 0                    |
| <b>seq444</b>  | Firmicutes    | Negativicutes | 0                  | 0                   | 0                   | 0                    |
| <b>seq494</b>  | Firmicutes    | Negativicutes | 0                  | 0                   | 0                   | 0                    |

Sequence Count Table

|                | <b>Phylum</b> | <b>Class</b>  | <b>Subject8WK0</b> | <b>Subject8WK12</b> | <b>Subject9WK0</b> | <b>Subject9WK12</b> |
|----------------|---------------|---------------|--------------------|---------------------|--------------------|---------------------|
| <b>seq1883</b> | Firmicutes    | Clostridia    | 0                  | 0                   | 0                  | 0                   |
| <b>seq1890</b> | Firmicutes    | Clostridia    | 0                  | 0                   | 0                  | 0                   |
| <b>seq1894</b> | Firmicutes    | Clostridia    | 0                  | 0                   | 0                  | 0                   |
| <b>seq1905</b> | Firmicutes    | Clostridia    | 0                  | 0                   | 0                  | 0                   |
| <b>seq1855</b> | Firmicutes    | Bacilli       | 0                  | 0                   | 0                  | 0                   |
| <b>seq1866</b> | Firmicutes    | Bacilli       | 0                  | 0                   | 0                  | 0                   |
| <b>seq518</b>  | Firmicutes    | Bacilli       | 0                  | 13                  | 0                  | 0                   |
| <b>seq32</b>   | Firmicutes    | Bacilli       | 303                | 195                 | 49                 | 213                 |
| <b>seq147</b>  | Firmicutes    | Bacilli       | 93                 | 88                  | 27                 | 55                  |
| <b>seq193</b>  | Firmicutes    | Bacilli       | 0                  | 0                   | 0                  | 0                   |
| <b>seq463</b>  | Firmicutes    | Bacilli       | 0                  | 0                   | 0                  | 75                  |
| <b>seq548</b>  | Firmicutes    | Bacilli       | 0                  | 0                   | 0                  | 0                   |
| <b>seq647</b>  | Firmicutes    | Bacilli       | 0                  | 0                   | 0                  | 0                   |
| <b>seq723</b>  | Firmicutes    | Bacilli       | 0                  | 0                   | 0                  | 0                   |
| <b>seq1034</b> | Firmicutes    | Bacilli       | 0                  | 0                   | 0                  | 0                   |
| <b>seq1347</b> | Firmicutes    | Bacilli       | 0                  | 0                   | 0                  | 0                   |
| <b>seq1521</b> | Firmicutes    | Bacilli       | 0                  | 0                   | 0                  | 0                   |
| <b>seq1644</b> | Firmicutes    | Bacilli       | 0                  | 0                   | 0                  | 0                   |
| <b>seq1787</b> | Firmicutes    | Bacilli       | 0                  | 0                   | 0                  | 0                   |
| <b>seq1775</b> | Firmicutes    | Clostridia    | 0                  | 0                   | 0                  | 0                   |
| <b>seq1878</b> | Firmicutes    | Clostridia    | 0                  | 0                   | 0                  | 0                   |
| <b>seq341</b>  | Firmicutes    | Negativicutes | 0                  | 0                   | 0                  | 0                   |
| <b>seq832</b>  | Firmicutes    | Negativicutes | 0                  | 0                   | 0                  | 0                   |
| <b>seq60</b>   | Firmicutes    | Negativicutes | 0                  | 0                   | 0                  | 0                   |
| <b>seq462</b>  | Firmicutes    | Negativicutes | 0                  | 0                   | 0                  | 0                   |
| <b>seq1416</b> | Firmicutes    | Negativicutes | 0                  | 0                   | 0                  | 0                   |
| <b>seq1655</b> | Firmicutes    | Negativicutes | 0                  | 0                   | 0                  | 0                   |
| <b>seq61</b>   | Firmicutes    | Negativicutes | 0                  | 0                   | 0                  | 0                   |
| <b>seq40</b>   | Firmicutes    | Negativicutes | 0                  | 0                   | 0                  | 0                   |
| <b>seq163</b>  | Firmicutes    | Negativicutes | 0                  | 0                   | 0                  | 0                   |
| <b>seq444</b>  | Firmicutes    | Negativicutes | 0                  | 0                   | 0                  | 0                   |
| <b>seq494</b>  | Firmicutes    | Negativicutes | 0                  | 0                   | 0                  | 0                   |

Sequence Count Table

|                | <b>Phylum</b> | <b>Class</b>  | <b>Subject10WK0</b> | <b>Subject10WK12</b> | <b>Subject22WK0</b> | <b>Subject22WK12</b> |
|----------------|---------------|---------------|---------------------|----------------------|---------------------|----------------------|
| <b>seq1883</b> | Firmicutes    | Clostridia    | 0                   | 0                    | 0                   | 0                    |
| <b>seq1890</b> | Firmicutes    | Clostridia    | 0                   | 0                    | 0                   | 0                    |
| <b>seq1894</b> | Firmicutes    | Clostridia    | 0                   | 0                    | 0                   | 0                    |
| <b>seq1905</b> | Firmicutes    | Clostridia    | 0                   | 0                    | 0                   | 0                    |
| <b>seq1855</b> | Firmicutes    | Bacilli       | 0                   | 5                    | 0                   | 0                    |
| <b>seq1866</b> | Firmicutes    | Bacilli       | 0                   | 0                    | 0                   | 0                    |
| <b>seq518</b>  | Firmicutes    | Bacilli       | 40                  | 0                    | 9                   | 0                    |
| <b>seq32</b>   | Firmicutes    | Bacilli       | 186                 | 94                   | 117                 | 59                   |
| <b>seq147</b>  | Firmicutes    | Bacilli       | 118                 | 0                    | 301                 | 38                   |
| <b>seq193</b>  | Firmicutes    | Bacilli       | 0                   | 0                    | 0                   | 0                    |
| <b>seq463</b>  | Firmicutes    | Bacilli       | 0                   | 0                    | 0                   | 0                    |
| <b>seq548</b>  | Firmicutes    | Bacilli       | 0                   | 0                    | 0                   | 0                    |
| <b>seq647</b>  | Firmicutes    | Bacilli       | 25                  | 0                    | 0                   | 0                    |
| <b>seq723</b>  | Firmicutes    | Bacilli       | 0                   | 0                    | 0                   | 0                    |
| <b>seq1034</b> | Firmicutes    | Bacilli       | 0                   | 0                    | 0                   | 0                    |
| <b>seq1347</b> | Firmicutes    | Bacilli       | 0                   | 0                    | 0                   | 0                    |
| <b>seq1521</b> | Firmicutes    | Bacilli       | 0                   | 0                    | 0                   | 0                    |
| <b>seq1644</b> | Firmicutes    | Bacilli       | 0                   | 0                    | 0                   | 0                    |
| <b>seq1787</b> | Firmicutes    | Bacilli       | 0                   | 0                    | 0                   | 0                    |
| <b>seq1775</b> | Firmicutes    | Clostridia    | 0                   | 0                    | 9                   | 0                    |
| <b>seq1878</b> | Firmicutes    | Clostridia    | 0                   | 0                    | 0                   | 0                    |
| <b>seq341</b>  | Firmicutes    | Negativicutes | 0                   | 0                    | 0                   | 0                    |
| <b>seq832</b>  | Firmicutes    | Negativicutes | 0                   | 0                    | 104                 | 92                   |
| <b>seq60</b>   | Firmicutes    | Negativicutes | 0                   | 0                    | 312                 | 586                  |
| <b>seq462</b>  | Firmicutes    | Negativicutes | 0                   | 0                    | 0                   | 0                    |
| <b>seq1416</b> | Firmicutes    | Negativicutes | 0                   | 0                    | 0                   | 0                    |
| <b>seq1655</b> | Firmicutes    | Negativicutes | 0                   | 0                    | 0                   | 0                    |
| <b>seq61</b>   | Firmicutes    | Negativicutes | 0                   | 0                    | 0                   | 0                    |
| <b>seq40</b>   | Firmicutes    | Negativicutes | 0                   | 0                    | 1431                | 2608                 |
| <b>seq163</b>  | Firmicutes    | Negativicutes | 0                   | 0                    | 0                   | 0                    |
| <b>seq444</b>  | Firmicutes    | Negativicutes | 0                   | 0                    | 0                   | 0                    |
| <b>seq494</b>  | Firmicutes    | Negativicutes | 0                   | 0                    | 0                   | 0                    |

Sequence Count Table

|                | <b>Phylum</b> | <b>Class</b>  | <b>Subject23WK0</b> | <b>Subject23WK12</b> | <b>Subject24WK0</b> | <b>Subject24WK12</b> |
|----------------|---------------|---------------|---------------------|----------------------|---------------------|----------------------|
| <b>seq1883</b> | Firmicutes    | Clostridia    | 0                   | 0                    | 0                   | 0                    |
| <b>seq1890</b> | Firmicutes    | Clostridia    | 0                   | 0                    | 0                   | 0                    |
| <b>seq1894</b> | Firmicutes    | Clostridia    | 0                   | 0                    | 0                   | 0                    |
| <b>seq1905</b> | Firmicutes    | Clostridia    | 0                   | 0                    | 0                   | 0                    |
| <b>seq1855</b> | Firmicutes    | Bacilli       | 0                   | 0                    | 0                   | 0                    |
| <b>seq1866</b> | Firmicutes    | Bacilli       | 0                   | 0                    | 0                   | 0                    |
| <b>seq518</b>  | Firmicutes    | Bacilli       | 0                   | 57                   | 0                   | 15                   |
| <b>seq32</b>   | Firmicutes    | Bacilli       | 264                 | 277                  | 326                 | 120                  |
| <b>seq147</b>  | Firmicutes    | Bacilli       | 61                  | 110                  | 82                  | 0                    |
| <b>seq193</b>  | Firmicutes    | Bacilli       | 0                   | 0                    | 0                   | 0                    |
| <b>seq463</b>  | Firmicutes    | Bacilli       | 0                   | 0                    | 35                  | 0                    |
| <b>seq548</b>  | Firmicutes    | Bacilli       | 0                   | 0                    | 0                   | 0                    |
| <b>seq647</b>  | Firmicutes    | Bacilli       | 0                   | 7                    | 92                  | 28                   |
| <b>seq723</b>  | Firmicutes    | Bacilli       | 0                   | 0                    | 0                   | 0                    |
| <b>seq1034</b> | Firmicutes    | Bacilli       | 0                   | 0                    | 0                   | 0                    |
| <b>seq1347</b> | Firmicutes    | Bacilli       | 0                   | 0                    | 0                   | 0                    |
| <b>seq1521</b> | Firmicutes    | Bacilli       | 0                   | 0                    | 0                   | 0                    |
| <b>seq1644</b> | Firmicutes    | Bacilli       | 0                   | 0                    | 0                   | 0                    |
| <b>seq1787</b> | Firmicutes    | Bacilli       | 0                   | 0                    | 0                   | 0                    |
| <b>seq1775</b> | Firmicutes    | Clostridia    | 0                   | 0                    | 0                   | 0                    |
| <b>seq1878</b> | Firmicutes    | Clostridia    | 0                   | 0                    | 0                   | 0                    |
| <b>seq341</b>  | Firmicutes    | Negativicutes | 41                  | 33                   | 0                   | 0                    |
| <b>seq832</b>  | Firmicutes    | Negativicutes | 0                   | 0                    | 0                   | 0                    |
| <b>seq60</b>   | Firmicutes    | Negativicutes | 0                   | 0                    | 0                   | 0                    |
| <b>seq462</b>  | Firmicutes    | Negativicutes | 0                   | 0                    | 0                   | 0                    |
| <b>seq1416</b> | Firmicutes    | Negativicutes | 0                   | 0                    | 0                   | 0                    |
| <b>seq1655</b> | Firmicutes    | Negativicutes | 0                   | 0                    | 0                   | 0                    |
| <b>seq61</b>   | Firmicutes    | Negativicutes | 0                   | 0                    | 0                   | 0                    |
| <b>seq40</b>   | Firmicutes    | Negativicutes | 0                   | 0                    | 0                   | 0                    |
| <b>seq163</b>  | Firmicutes    | Negativicutes | 0                   | 0                    | 0                   | 0                    |
| <b>seq444</b>  | Firmicutes    | Negativicutes | 0                   | 0                    | 0                   | 0                    |
| <b>seq494</b>  | Firmicutes    | Negativicutes | 0                   | 0                    | 0                   | 0                    |

Sequence Count Table

|                | <b>Phylum</b> | <b>Class</b>  | <b>Subject11WK0</b> | <b>Subject11WK12</b> | <b>Subject12WK0</b> | <b>Subject12WK12</b> |
|----------------|---------------|---------------|---------------------|----------------------|---------------------|----------------------|
| <b>seq1883</b> | Firmicutes    | Clostridia    | 0                   | 0                    | 0                   | 0                    |
| <b>seq1890</b> | Firmicutes    | Clostridia    | 0                   | 0                    | 0                   | 0                    |
| <b>seq1894</b> | Firmicutes    | Clostridia    | 0                   | 0                    | 0                   | 0                    |
| <b>seq1905</b> | Firmicutes    | Clostridia    | 0                   | 0                    | 0                   | 0                    |
| <b>seq1855</b> | Firmicutes    | Bacilli       | 0                   | 0                    | 0                   | 0                    |
| <b>seq1866</b> | Firmicutes    | Bacilli       | 0                   | 0                    | 0                   | 0                    |
| <b>seq518</b>  | Firmicutes    | Bacilli       | 14                  | 15                   | 11                  | 0                    |
| <b>seq32</b>   | Firmicutes    | Bacilli       | 550                 | 466                  | 27                  | 41                   |
| <b>seq147</b>  | Firmicutes    | Bacilli       | 182                 | 175                  | 0                   | 0                    |
| <b>seq193</b>  | Firmicutes    | Bacilli       | 0                   | 0                    | 0                   | 0                    |
| <b>seq463</b>  | Firmicutes    | Bacilli       | 0                   | 0                    | 0                   | 0                    |
| <b>seq548</b>  | Firmicutes    | Bacilli       | 0                   | 0                    | 0                   | 0                    |
| <b>seq647</b>  | Firmicutes    | Bacilli       | 12                  | 0                    | 0                   | 0                    |
| <b>seq723</b>  | Firmicutes    | Bacilli       | 0                   | 0                    | 0                   | 0                    |
| <b>seq1034</b> | Firmicutes    | Bacilli       | 0                   | 0                    | 0                   | 0                    |
| <b>seq1347</b> | Firmicutes    | Bacilli       | 0                   | 0                    | 0                   | 0                    |
| <b>seq1521</b> | Firmicutes    | Bacilli       | 0                   | 0                    | 0                   | 0                    |
| <b>seq1644</b> | Firmicutes    | Bacilli       | 0                   | 0                    | 0                   | 0                    |
| <b>seq1787</b> | Firmicutes    | Bacilli       | 0                   | 0                    | 0                   | 0                    |
| <b>seq1775</b> | Firmicutes    | Clostridia    | 0                   | 0                    | 0                   | 0                    |
| <b>seq1878</b> | Firmicutes    | Clostridia    | 0                   | 0                    | 0                   | 0                    |
| <b>seq341</b>  | Firmicutes    | Negativicutes | 0                   | 0                    | 0                   | 0                    |
| <b>seq832</b>  | Firmicutes    | Negativicutes | 0                   | 0                    | 0                   | 0                    |
| <b>seq60</b>   | Firmicutes    | Negativicutes | 2109                | 2465                 | 1168                | 2370                 |
| <b>seq462</b>  | Firmicutes    | Negativicutes | 0                   | 0                    | 0                   | 0                    |
| <b>seq1416</b> | Firmicutes    | Negativicutes | 0                   | 0                    | 0                   | 0                    |
| <b>seq1655</b> | Firmicutes    | Negativicutes | 0                   | 0                    | 0                   | 0                    |
| <b>seq61</b>   | Firmicutes    | Negativicutes | 0                   | 0                    | 0                   | 0                    |
| <b>seq40</b>   | Firmicutes    | Negativicutes | 5218                | 10052                | 0                   | 0                    |
| <b>seq163</b>  | Firmicutes    | Negativicutes | 0                   | 0                    | 0                   | 0                    |
| <b>seq444</b>  | Firmicutes    | Negativicutes | 0                   | 0                    | 0                   | 0                    |
| <b>seq494</b>  | Firmicutes    | Negativicutes | 0                   | 0                    | 0                   | 0                    |

Sequence Count Table

|                | <b>Phylum</b> | <b>Class</b>  | <b>Subject25WK0</b> | <b>Subject25WK12</b> | <b>Subject38WK0</b> | <b>Subject38WK12</b> |
|----------------|---------------|---------------|---------------------|----------------------|---------------------|----------------------|
| <b>seq1883</b> | Firmicutes    | Clostridia    | 4                   | 0                    | 0                   | 0                    |
| <b>seq1890</b> | Firmicutes    | Clostridia    | 0                   | 0                    | 0                   | 0                    |
| <b>seq1894</b> | Firmicutes    | Clostridia    | 0                   | 0                    | 0                   | 0                    |
| <b>seq1905</b> | Firmicutes    | Clostridia    | 0                   | 0                    | 0                   | 0                    |
| <b>seq1855</b> | Firmicutes    | Bacilli       | 0                   | 0                    | 0                   | 0                    |
| <b>seq1866</b> | Firmicutes    | Bacilli       | 0                   | 5                    | 0                   | 0                    |
| <b>seq518</b>  | Firmicutes    | Bacilli       | 14                  | 0                    | 0                   | 0                    |
| <b>seq32</b>   | Firmicutes    | Bacilli       | 338                 | 19149                | 0                   | 0                    |
| <b>seq147</b>  | Firmicutes    | Bacilli       | 55                  | 52                   | 0                   | 0                    |
| <b>seq193</b>  | Firmicutes    | Bacilli       | 0                   | 0                    | 0                   | 0                    |
| <b>seq463</b>  | Firmicutes    | Bacilli       | 0                   | 0                    | 0                   | 0                    |
| <b>seq548</b>  | Firmicutes    | Bacilli       | 0                   | 0                    | 0                   | 0                    |
| <b>seq647</b>  | Firmicutes    | Bacilli       | 64                  | 15                   | 0                   | 0                    |
| <b>seq723</b>  | Firmicutes    | Bacilli       | 0                   | 0                    | 0                   | 0                    |
| <b>seq1034</b> | Firmicutes    | Bacilli       | 0                   | 0                    | 0                   | 0                    |
| <b>seq1347</b> | Firmicutes    | Bacilli       | 0                   | 0                    | 0                   | 0                    |
| <b>seq1521</b> | Firmicutes    | Bacilli       | 0                   | 0                    | 0                   | 0                    |
| <b>seq1644</b> | Firmicutes    | Bacilli       | 0                   | 0                    | 0                   | 0                    |
| <b>seq1787</b> | Firmicutes    | Bacilli       | 0                   | 0                    | 0                   | 0                    |
| <b>seq1775</b> | Firmicutes    | Clostridia    | 0                   | 0                    | 0                   | 0                    |
| <b>seq1878</b> | Firmicutes    | Clostridia    | 0                   | 0                    | 0                   | 0                    |
| <b>seq341</b>  | Firmicutes    | Negativicutes | 0                   | 0                    | 0                   | 0                    |
| <b>seq832</b>  | Firmicutes    | Negativicutes | 0                   | 0                    | 0                   | 0                    |
| <b>seq60</b>   | Firmicutes    | Negativicutes | 518                 | 660                  | 0                   | 0                    |
| <b>seq462</b>  | Firmicutes    | Negativicutes | 0                   | 0                    | 0                   | 0                    |
| <b>seq1416</b> | Firmicutes    | Negativicutes | 0                   | 0                    | 0                   | 0                    |
| <b>seq1655</b> | Firmicutes    | Negativicutes | 0                   | 0                    | 0                   | 0                    |
| <b>seq61</b>   | Firmicutes    | Negativicutes | 0                   | 0                    | 0                   | 0                    |
| <b>seq40</b>   | Firmicutes    | Negativicutes | 0                   | 0                    | 0                   | 0                    |
| <b>seq163</b>  | Firmicutes    | Negativicutes | 0                   | 0                    | 0                   | 0                    |
| <b>seq444</b>  | Firmicutes    | Negativicutes | 0                   | 0                    | 0                   | 0                    |
| <b>seq494</b>  | Firmicutes    | Negativicutes | 0                   | 0                    | 0                   | 0                    |

Sequence Count Table

|                | <b>Phylum</b> | <b>Class</b>  | <b>Subject31WK0</b> | <b>Subject31WK12</b> | <b>Subject32WK0</b> | <b>Subject32WK12</b> |
|----------------|---------------|---------------|---------------------|----------------------|---------------------|----------------------|
| <b>seq1883</b> | Firmicutes    | Clostridia    | 0                   | 0                    | 0                   | 0                    |
| <b>seq1890</b> | Firmicutes    | Clostridia    | 0                   | 0                    | 0                   | 0                    |
| <b>seq1894</b> | Firmicutes    | Clostridia    | 0                   | 0                    | 0                   | 0                    |
| <b>seq1905</b> | Firmicutes    | Clostridia    | 0                   | 0                    | 0                   | 0                    |
| <b>seq1855</b> | Firmicutes    | Bacilli       | 0                   | 0                    | 0                   | 0                    |
| <b>seq1866</b> | Firmicutes    | Bacilli       | 0                   | 0                    | 0                   | 0                    |
| <b>seq518</b>  | Firmicutes    | Bacilli       | 0                   | 0                    | 18                  | 0                    |
| <b>seq32</b>   | Firmicutes    | Bacilli       | 0                   | 0                    | 540                 | 0                    |
| <b>seq147</b>  | Firmicutes    | Bacilli       | 0                   | 0                    | 62                  | 0                    |
| <b>seq193</b>  | Firmicutes    | Bacilli       | 0                   | 0                    | 0                   | 0                    |
| <b>seq463</b>  | Firmicutes    | Bacilli       | 0                   | 0                    | 51                  | 0                    |
| <b>seq548</b>  | Firmicutes    | Bacilli       | 0                   | 0                    | 0                   | 0                    |
| <b>seq647</b>  | Firmicutes    | Bacilli       | 0                   | 0                    | 0                   | 0                    |
| <b>seq723</b>  | Firmicutes    | Bacilli       | 0                   | 0                    | 0                   | 0                    |
| <b>seq1034</b> | Firmicutes    | Bacilli       | 0                   | 0                    | 0                   | 0                    |
| <b>seq1347</b> | Firmicutes    | Bacilli       | 0                   | 0                    | 0                   | 0                    |
| <b>seq1521</b> | Firmicutes    | Bacilli       | 0                   | 0                    | 0                   | 0                    |
| <b>seq1644</b> | Firmicutes    | Bacilli       | 0                   | 0                    | 0                   | 0                    |
| <b>seq1787</b> | Firmicutes    | Bacilli       | 0                   | 0                    | 0                   | 0                    |
| <b>seq1775</b> | Firmicutes    | Clostridia    | 0                   | 0                    | 0                   | 0                    |
| <b>seq1878</b> | Firmicutes    | Clostridia    | 0                   | 0                    | 0                   | 0                    |
| <b>seq341</b>  | Firmicutes    | Negativicutes | 0                   | 0                    | 180                 | 0                    |
| <b>seq832</b>  | Firmicutes    | Negativicutes | 0                   | 0                    | 0                   | 0                    |
| <b>seq60</b>   | Firmicutes    | Negativicutes | 0                   | 0                    | 1890                | 0                    |
| <b>seq462</b>  | Firmicutes    | Negativicutes | 0                   | 0                    | 0                   | 0                    |
| <b>seq1416</b> | Firmicutes    | Negativicutes | 0                   | 0                    | 0                   | 0                    |
| <b>seq1655</b> | Firmicutes    | Negativicutes | 0                   | 0                    | 0                   | 0                    |
| <b>seq61</b>   | Firmicutes    | Negativicutes | 0                   | 0                    | 0                   | 0                    |
| <b>seq40</b>   | Firmicutes    | Negativicutes | 0                   | 0                    | 5379                | 13                   |
| <b>seq163</b>  | Firmicutes    | Negativicutes | 0                   | 0                    | 0                   | 0                    |
| <b>seq444</b>  | Firmicutes    | Negativicutes | 0                   | 0                    | 0                   | 0                    |
| <b>seq494</b>  | Firmicutes    | Negativicutes | 0                   | 0                    | 0                   | 0                    |

Sequence Count Table

|                | <b>Phylum</b> | <b>Class</b>  | <b>Subject13WK0</b> | <b>Subject13WK12</b> | <b>Subject39WK0</b> | <b>Subject39WK12</b> |
|----------------|---------------|---------------|---------------------|----------------------|---------------------|----------------------|
| <b>seq1883</b> | Firmicutes    | Clostridia    | 0                   | 0                    | 0                   | 0                    |
| <b>seq1890</b> | Firmicutes    | Clostridia    | 0                   | 3                    | 0                   | 0                    |
| <b>seq1894</b> | Firmicutes    | Clostridia    | 0                   | 0                    | 0                   | 0                    |
| <b>seq1905</b> | Firmicutes    | Clostridia    | 0                   | 0                    | 0                   | 2                    |
| <b>seq1855</b> | Firmicutes    | Bacilli       | 0                   | 0                    | 0                   | 0                    |
| <b>seq1866</b> | Firmicutes    | Bacilli       | 0                   | 0                    | 0                   | 0                    |
| <b>seq518</b>  | Firmicutes    | Bacilli       | 19                  | 21                   | 0                   | 14                   |
| <b>seq32</b>   | Firmicutes    | Bacilli       | 193                 | 123                  | 0                   | 2629                 |
| <b>seq147</b>  | Firmicutes    | Bacilli       | 38                  | 0                    | 0                   | 375                  |
| <b>seq193</b>  | Firmicutes    | Bacilli       | 0                   | 0                    | 0                   | 0                    |
| <b>seq463</b>  | Firmicutes    | Bacilli       | 0                   | 0                    | 0                   | 24                   |
| <b>seq548</b>  | Firmicutes    | Bacilli       | 24                  | 27                   | 0                   | 0                    |
| <b>seq647</b>  | Firmicutes    | Bacilli       | 0                   | 0                    | 0                   | 0                    |
| <b>seq723</b>  | Firmicutes    | Bacilli       | 0                   | 0                    | 0                   | 0                    |
| <b>seq1034</b> | Firmicutes    | Bacilli       | 0                   | 0                    | 0                   | 0                    |
| <b>seq1347</b> | Firmicutes    | Bacilli       | 0                   | 0                    | 0                   | 0                    |
| <b>seq1521</b> | Firmicutes    | Bacilli       | 0                   | 0                    | 0                   | 0                    |
| <b>seq1644</b> | Firmicutes    | Bacilli       | 0                   | 0                    | 0                   | 0                    |
| <b>seq1787</b> | Firmicutes    | Bacilli       | 0                   | 0                    | 0                   | 0                    |
| <b>seq1775</b> | Firmicutes    | Clostridia    | 0                   | 0                    | 0                   | 0                    |
| <b>seq1878</b> | Firmicutes    | Clostridia    | 0                   | 0                    | 0                   | 0                    |
| <b>seq341</b>  | Firmicutes    | Negativicutes | 0                   | 0                    | 0                   | 124                  |
| <b>seq832</b>  | Firmicutes    | Negativicutes | 0                   | 0                    | 0                   | 0                    |
| <b>seq60</b>   | Firmicutes    | Negativicutes | 0                   | 0                    | 0                   | 0                    |
| <b>seq462</b>  | Firmicutes    | Negativicutes | 0                   | 0                    | 0                   | 0                    |
| <b>seq1416</b> | Firmicutes    | Negativicutes | 0                   | 0                    | 0                   | 0                    |
| <b>seq1655</b> | Firmicutes    | Negativicutes | 0                   | 0                    | 0                   | 0                    |
| <b>seq61</b>   | Firmicutes    | Negativicutes | 0                   | 0                    | 0                   | 0                    |
| <b>seq40</b>   | Firmicutes    | Negativicutes | 0                   | 0                    | 0                   | 0                    |
| <b>seq163</b>  | Firmicutes    | Negativicutes | 0                   | 0                    | 0                   | 0                    |
| <b>seq444</b>  | Firmicutes    | Negativicutes | 0                   | 0                    | 0                   | 0                    |
| <b>seq494</b>  | Firmicutes    | Negativicutes | 0                   | 0                    | 0                   | 0                    |



Sequence Count Table

|                | <b>Phylum</b> | <b>Class</b>  | <b>Subject26WK0</b> | <b>Subject26WK12</b> | <b>Subject14WK0</b> | <b>Subject14WK12</b> |
|----------------|---------------|---------------|---------------------|----------------------|---------------------|----------------------|
| <b>seq1883</b> | Firmicutes    | Clostridia    | 0                   | 0                    | 0                   | 0                    |
| <b>seq1890</b> | Firmicutes    | Clostridia    | 0                   | 0                    | 0                   | 0                    |
| <b>seq1894</b> | Firmicutes    | Clostridia    | 0                   | 0                    | 0                   | 3                    |
| <b>seq1905</b> | Firmicutes    | Clostridia    | 0                   | 0                    | 0                   | 0                    |
| <b>seq1855</b> | Firmicutes    | Bacilli       | 0                   | 0                    | 0                   | 0                    |
| <b>seq1866</b> | Firmicutes    | Bacilli       | 0                   | 0                    | 0                   | 0                    |
| <b>seq518</b>  | Firmicutes    | Bacilli       | 0                   | 15                   | 0                   | 0                    |
| <b>seq32</b>   | Firmicutes    | Bacilli       | 1070                | 1243                 | 599                 | 165                  |
| <b>seq147</b>  | Firmicutes    | Bacilli       | 184                 | 56                   | 64                  | 46                   |
| <b>seq193</b>  | Firmicutes    | Bacilli       | 0                   | 0                    | 0                   | 0                    |
| <b>seq463</b>  | Firmicutes    | Bacilli       | 26                  | 0                    | 0                   | 0                    |
| <b>seq548</b>  | Firmicutes    | Bacilli       | 0                   | 0                    | 0                   | 0                    |
| <b>seq647</b>  | Firmicutes    | Bacilli       | 28                  | 0                    | 0                   | 0                    |
| <b>seq723</b>  | Firmicutes    | Bacilli       | 0                   | 0                    | 0                   | 0                    |
| <b>seq1034</b> | Firmicutes    | Bacilli       | 0                   | 14                   | 0                   | 0                    |
| <b>seq1347</b> | Firmicutes    | Bacilli       | 0                   | 0                    | 0                   | 0                    |
| <b>seq1521</b> | Firmicutes    | Bacilli       | 0                   | 0                    | 0                   | 0                    |
| <b>seq1644</b> | Firmicutes    | Bacilli       | 0                   | 0                    | 0                   | 0                    |
| <b>seq1787</b> | Firmicutes    | Bacilli       | 0                   | 0                    | 0                   | 0                    |
| <b>seq1775</b> | Firmicutes    | Clostridia    | 0                   | 0                    | 0                   | 0                    |
| <b>seq1878</b> | Firmicutes    | Clostridia    | 0                   | 0                    | 0                   | 0                    |
| <b>seq341</b>  | Firmicutes    | Negativicutes | 0                   | 0                    | 35                  | 17                   |
| <b>seq832</b>  | Firmicutes    | Negativicutes | 0                   | 0                    | 0                   | 0                    |
| <b>seq60</b>   | Firmicutes    | Negativicutes | 0                   | 0                    | 130                 | 0                    |
| <b>seq462</b>  | Firmicutes    | Negativicutes | 0                   | 0                    | 0                   | 0                    |
| <b>seq1416</b> | Firmicutes    | Negativicutes | 0                   | 0                    | 0                   | 0                    |
| <b>seq1655</b> | Firmicutes    | Negativicutes | 0                   | 0                    | 0                   | 0                    |
| <b>seq61</b>   | Firmicutes    | Negativicutes | 0                   | 0                    | 0                   | 0                    |
| <b>seq40</b>   | Firmicutes    | Negativicutes | 0                   | 0                    | 0                   | 0                    |
| <b>seq163</b>  | Firmicutes    | Negativicutes | 0                   | 0                    | 0                   | 0                    |
| <b>seq444</b>  | Firmicutes    | Negativicutes | 0                   | 0                    | 0                   | 0                    |
| <b>seq494</b>  | Firmicutes    | Negativicutes | 0                   | 0                    | 0                   | 0                    |

Sequence Count Table

|                | <b>Phylum</b> | <b>Class</b>  | <b>Subject27WK0</b> | <b>Subject27WK12</b> | <b>Subject15WK0</b> | <b>Subject15WK12</b> |
|----------------|---------------|---------------|---------------------|----------------------|---------------------|----------------------|
| <b>seq1883</b> | Firmicutes    | Clostridia    | 0                   | 0                    | 0                   | 0                    |
| <b>seq1890</b> | Firmicutes    | Clostridia    | 0                   | 0                    | 0                   | 0                    |
| <b>seq1894</b> | Firmicutes    | Clostridia    | 0                   | 0                    | 0                   | 0                    |
| <b>seq1905</b> | Firmicutes    | Clostridia    | 0                   | 0                    | 0                   | 0                    |
| <b>seq1855</b> | Firmicutes    | Bacilli       | 0                   | 0                    | 0                   | 0                    |
| <b>seq1866</b> | Firmicutes    | Bacilli       | 0                   | 0                    | 0                   | 0                    |
| <b>seq518</b>  | Firmicutes    | Bacilli       | 0                   | 51                   | 24                  | 0                    |
| <b>seq32</b>   | Firmicutes    | Bacilli       | 2912                | 4149                 | 3219                | 50                   |
| <b>seq147</b>  | Firmicutes    | Bacilli       | 1223                | 1429                 | 159                 | 86                   |
| <b>seq193</b>  | Firmicutes    | Bacilli       | 0                   | 0                    | 0                   | 0                    |
| <b>seq463</b>  | Firmicutes    | Bacilli       | 114                 | 161                  | 0                   | 28                   |
| <b>seq548</b>  | Firmicutes    | Bacilli       | 312                 | 108                  | 0                   | 0                    |
| <b>seq647</b>  | Firmicutes    | Bacilli       | 11                  | 43                   | 0                   | 0                    |
| <b>seq723</b>  | Firmicutes    | Bacilli       | 133                 | 0                    | 0                   | 0                    |
| <b>seq1034</b> | Firmicutes    | Bacilli       | 0                   | 0                    | 0                   | 0                    |
| <b>seq1347</b> | Firmicutes    | Bacilli       | 0                   | 0                    | 0                   | 0                    |
| <b>seq1521</b> | Firmicutes    | Bacilli       | 0                   | 0                    | 0                   | 0                    |
| <b>seq1644</b> | Firmicutes    | Bacilli       | 0                   | 0                    | 0                   | 0                    |
| <b>seq1787</b> | Firmicutes    | Bacilli       | 0                   | 0                    | 0                   | 0                    |
| <b>seq1775</b> | Firmicutes    | Clostridia    | 0                   | 0                    | 0                   | 0                    |
| <b>seq1878</b> | Firmicutes    | Clostridia    | 0                   | 0                    | 0                   | 0                    |
| <b>seq341</b>  | Firmicutes    | Negativicutes | 0                   | 0                    | 0                   | 0                    |
| <b>seq832</b>  | Firmicutes    | Negativicutes | 0                   | 0                    | 0                   | 0                    |
| <b>seq60</b>   | Firmicutes    | Negativicutes | 0                   | 0                    | 0                   | 0                    |
| <b>seq462</b>  | Firmicutes    | Negativicutes | 0                   | 0                    | 0                   | 0                    |
| <b>seq1416</b> | Firmicutes    | Negativicutes | 0                   | 0                    | 0                   | 0                    |
| <b>seq1655</b> | Firmicutes    | Negativicutes | 0                   | 16                   | 0                   | 0                    |
| <b>seq61</b>   | Firmicutes    | Negativicutes | 0                   | 0                    | 0                   | 0                    |
| <b>seq40</b>   | Firmicutes    | Negativicutes | 0                   | 0                    | 0                   | 0                    |
| <b>seq163</b>  | Firmicutes    | Negativicutes | 0                   | 0                    | 0                   | 0                    |
| <b>seq444</b>  | Firmicutes    | Negativicutes | 0                   | 0                    | 0                   | 0                    |
| <b>seq494</b>  | Firmicutes    | Negativicutes | 0                   | 0                    | 0                   | 0                    |

Sequence Count Table

|                | <b>Phylum</b> | <b>Class</b>  | <b>Δ</b> |  |  |  |
|----------------|---------------|---------------|----------|--|--|--|
| <b>seq1883</b> | Firmicutes    | Clostridia    |          |  |  |  |
| <b>seq1890</b> | Firmicutes    | Clostridia    |          |  |  |  |
| <b>seq1894</b> | Firmicutes    | Clostridia    |          |  |  |  |
| <b>seq1905</b> | Firmicutes    | Clostridia    |          |  |  |  |
| <b>seq1855</b> | Firmicutes    | Bacilli       |          |  |  |  |
| <b>seq1866</b> | Firmicutes    | Bacilli       |          |  |  |  |
| <b>seq518</b>  | Firmicutes    | Bacilli       |          |  |  |  |
| <b>seq32</b>   | Firmicutes    | Bacilli       |          |  |  |  |
| <b>seq147</b>  | Firmicutes    | Bacilli       |          |  |  |  |
| <b>seq193</b>  | Firmicutes    | Bacilli       |          |  |  |  |
| <b>seq463</b>  | Firmicutes    | Bacilli       |          |  |  |  |
| <b>seq548</b>  | Firmicutes    | Bacilli       |          |  |  |  |
| <b>seq647</b>  | Firmicutes    | Bacilli       |          |  |  |  |
| <b>seq723</b>  | Firmicutes    | Bacilli       |          |  |  |  |
| <b>seq1034</b> | Firmicutes    | Bacilli       |          |  |  |  |
| <b>seq1347</b> | Firmicutes    | Bacilli       |          |  |  |  |
| <b>seq1521</b> | Firmicutes    | Bacilli       |          |  |  |  |
| <b>seq1644</b> | Firmicutes    | Bacilli       |          |  |  |  |
| <b>seq1787</b> | Firmicutes    | Bacilli       |          |  |  |  |
| <b>seq1775</b> | Firmicutes    | Clostridia    |          |  |  |  |
| <b>seq1878</b> | Firmicutes    | Clostridia    |          |  |  |  |
| <b>seq341</b>  | Firmicutes    | Negativicutes |          |  |  |  |
| <b>seq832</b>  | Firmicutes    | Negativicutes |          |  |  |  |
| <b>seq60</b>   | Firmicutes    | Negativicutes |          |  |  |  |
| <b>seq462</b>  | Firmicutes    | Negativicutes |          |  |  |  |
| <b>seq1416</b> | Firmicutes    | Negativicutes |          |  |  |  |
| <b>seq1655</b> | Firmicutes    | Negativicutes |          |  |  |  |
| <b>seq61</b>   | Firmicutes    | Negativicutes |          |  |  |  |
| <b>seq40</b>   | Firmicutes    | Negativicutes |          |  |  |  |
| <b>seq163</b>  | Firmicutes    | Negativicutes |          |  |  |  |
| <b>seq444</b>  | Firmicutes    | Negativicutes |          |  |  |  |
| <b>seq494</b>  | Firmicutes    | Negativicutes |          |  |  |  |

Sequence Count Table

|                | <b>Phylum</b> | <b>Class</b>  | <b>Order</b>    | <b>Family</b>   |
|----------------|---------------|---------------|-----------------|-----------------|
| <b>seq1669</b> | Firmicutes    | Negativicutes | Selenomonadales | Veillonellaceae |
| <b>seq1723</b> | Firmicutes    | Negativicutes | Selenomonadales | Veillonellaceae |
| <b>seq150</b>  | Firmicutes    | Negativicutes | Selenomonadales | Veillonellaceae |
| <b>seq522</b>  | Firmicutes    | Negativicutes | Selenomonadales | Veillonellaceae |
| <b>seq1631</b> | Firmicutes    | Negativicutes | Selenomonadales | Veillonellaceae |
| <b>seq319</b>  | Firmicutes    | Negativicutes | Selenomonadales | Veillonellaceae |
| <b>seq594</b>  | Firmicutes    | Negativicutes | Selenomonadales | Veillonellaceae |
| <b>seq649</b>  | Firmicutes    | Negativicutes | Selenomonadales | Veillonellaceae |
| <b>seq1415</b> | Firmicutes    | Negativicutes | Selenomonadales | Veillonellaceae |
| <b>seq432</b>  | Firmicutes    | Negativicutes | Selenomonadales | Veillonellaceae |
| <b>seq608</b>  | Firmicutes    | Negativicutes | Selenomonadales | Veillonellaceae |
| <b>seq155</b>  | Firmicutes    | Clostridia    | Clostridiales   |                 |
| <b>seq242</b>  | Firmicutes    | Clostridia    |                 |                 |
| <b>seq287</b>  | Firmicutes    | Clostridia    |                 |                 |
| <b>seq411</b>  | Firmicutes    | Clostridia    | Clostridiales   |                 |
| <b>seq412</b>  | Firmicutes    | Clostridia    | Clostridiales   |                 |
| <b>seq472</b>  | Firmicutes    |               |                 |                 |
| <b>seq534</b>  | Firmicutes    | Clostridia    | Clostridiales   |                 |
| <b>seq549</b>  | Firmicutes    | Clostridia    | Clostridiales   |                 |
| <b>seq564</b>  | Firmicutes    | Clostridia    | Clostridiales   |                 |
| <b>seq588</b>  | Firmicutes    |               |                 |                 |
| <b>seq611</b>  | Firmicutes    | Clostridia    |                 |                 |
| <b>seq674</b>  | Firmicutes    |               |                 |                 |
| <b>seq742</b>  | Firmicutes    | Clostridia    | Clostridiales   |                 |
| <b>seq793</b>  | Firmicutes    | Clostridia    | Clostridiales   |                 |
| <b>seq971</b>  | Firmicutes    |               |                 |                 |
| <b>seq975</b>  | Firmicutes    | Clostridia    |                 |                 |
| <b>seq989</b>  | Firmicutes    | Clostridia    | Clostridiales   |                 |
| <b>seq1048</b> | Firmicutes    | Clostridia    |                 |                 |
| <b>seq1111</b> | Firmicutes    | Clostridia    | Clostridiales   |                 |
| <b>seq1151</b> | Firmicutes    | Clostridia    | Clostridiales   |                 |
| <b>seq1178</b> | Firmicutes    | Clostridia    | Clostridiales   |                 |

Sequence Count Table

|                | <b>Phylum</b> | <b>Class</b>  | <b>Genus</b>   | <b>Species</b> |
|----------------|---------------|---------------|----------------|----------------|
| <b>seq1669</b> | Firmicutes    | Negativicutes | Megasphaera    |                |
| <b>seq1723</b> | Firmicutes    | Negativicutes | Megasphaera    |                |
| <b>seq150</b>  | Firmicutes    | Negativicutes | Mitsuokella    | jalaludinii    |
| <b>seq522</b>  | Firmicutes    | Negativicutes | Mitsuokella    | multacida      |
| <b>seq1631</b> | Firmicutes    | Negativicutes | Negativicoccus | massiliensis   |
| <b>seq319</b>  | Firmicutes    | Negativicutes | Veillonella    |                |
| <b>seq594</b>  | Firmicutes    | Negativicutes | Veillonella    |                |
| <b>seq649</b>  | Firmicutes    | Negativicutes | Veillonella    |                |
| <b>seq1415</b> | Firmicutes    | Negativicutes | Veillonella    |                |
| <b>seq432</b>  | Firmicutes    | Negativicutes |                |                |
| <b>seq608</b>  | Firmicutes    | Negativicutes |                |                |
| <b>seq155</b>  | Firmicutes    | Clostridia    |                |                |
| <b>seq242</b>  | Firmicutes    | Clostridia    |                |                |
| <b>seq287</b>  | Firmicutes    | Clostridia    |                |                |
| <b>seq411</b>  | Firmicutes    | Clostridia    |                |                |
| <b>seq412</b>  | Firmicutes    | Clostridia    |                |                |
| <b>seq472</b>  | Firmicutes    |               |                |                |
| <b>seq534</b>  | Firmicutes    | Clostridia    |                |                |
| <b>seq549</b>  | Firmicutes    | Clostridia    |                |                |
| <b>seq564</b>  | Firmicutes    | Clostridia    |                |                |
| <b>seq588</b>  | Firmicutes    |               |                |                |
| <b>seq611</b>  | Firmicutes    | Clostridia    |                |                |
| <b>seq674</b>  | Firmicutes    |               |                |                |
| <b>seq742</b>  | Firmicutes    | Clostridia    |                |                |
| <b>seq793</b>  | Firmicutes    | Clostridia    |                |                |
| <b>seq971</b>  | Firmicutes    |               |                |                |
| <b>seq975</b>  | Firmicutes    | Clostridia    |                |                |
| <b>seq989</b>  | Firmicutes    | Clostridia    |                |                |
| <b>seq1048</b> | Firmicutes    | Clostridia    |                |                |
| <b>seq1111</b> | Firmicutes    | Clostridia    |                |                |
| <b>seq1151</b> | Firmicutes    | Clostridia    |                |                |
| <b>seq1178</b> | Firmicutes    | Clostridia    |                |                |

Sequence Count Table

|                | <b>Phylum</b> | <b>Class</b>  | <b>Subject34WK0</b> | <b>Subject34WK12</b> | <b>Subject16WK0</b> | <b>Subject16WK12</b> |
|----------------|---------------|---------------|---------------------|----------------------|---------------------|----------------------|
| <b>seq1669</b> | Firmicutes    | Negativicutes | 0                   | 0                    | 0                   | 0                    |
| <b>seq1723</b> | Firmicutes    | Negativicutes | 0                   | 0                    | 0                   | 0                    |
| <b>seq150</b>  | Firmicutes    | Negativicutes | 0                   | 0                    | 0                   | 0                    |
| <b>seq522</b>  | Firmicutes    | Negativicutes | 0                   | 0                    | 0                   | 0                    |
| <b>seq1631</b> | Firmicutes    | Negativicutes | 0                   | 0                    | 0                   | 0                    |
| <b>seq319</b>  | Firmicutes    | Negativicutes | 124                 | 132                  | 112                 | 0                    |
| <b>seq594</b>  | Firmicutes    | Negativicutes | 0                   | 0                    | 0                   | 0                    |
| <b>seq649</b>  | Firmicutes    | Negativicutes | 0                   | 0                    | 0                   | 0                    |
| <b>seq1415</b> | Firmicutes    | Negativicutes | 0                   | 0                    | 0                   | 0                    |
| <b>seq432</b>  | Firmicutes    | Negativicutes | 0                   | 0                    | 0                   | 0                    |
| <b>seq608</b>  | Firmicutes    | Negativicutes | 0                   | 0                    | 0                   | 0                    |
| <b>seq155</b>  | Firmicutes    | Clostridia    | 0                   | 0                    | 0                   | 0                    |
| <b>seq242</b>  | Firmicutes    | Clostridia    | 0                   | 0                    | 0                   | 0                    |
| <b>seq287</b>  | Firmicutes    | Clostridia    | 0                   | 0                    | 0                   | 0                    |
| <b>seq411</b>  | Firmicutes    | Clostridia    | 0                   | 0                    | 0                   | 0                    |
| <b>seq412</b>  | Firmicutes    | Clostridia    | 0                   | 0                    | 0                   | 0                    |
| <b>seq472</b>  | Firmicutes    |               | 0                   | 0                    | 0                   | 0                    |
| <b>seq534</b>  | Firmicutes    | Clostridia    | 0                   | 0                    | 0                   | 0                    |
| <b>seq549</b>  | Firmicutes    | Clostridia    | 0                   | 0                    | 32                  | 75                   |
| <b>seq564</b>  | Firmicutes    | Clostridia    | 0                   | 35                   | 0                   | 0                    |
| <b>seq588</b>  | Firmicutes    |               | 0                   | 0                    | 0                   | 0                    |
| <b>seq611</b>  | Firmicutes    | Clostridia    | 0                   | 0                    | 0                   | 0                    |
| <b>seq674</b>  | Firmicutes    |               | 0                   | 0                    | 0                   | 0                    |
| <b>seq742</b>  | Firmicutes    | Clostridia    | 0                   | 0                    | 0                   | 0                    |
| <b>seq793</b>  | Firmicutes    | Clostridia    | 0                   | 0                    | 0                   | 0                    |
| <b>seq971</b>  | Firmicutes    |               | 0                   | 0                    | 0                   | 0                    |
| <b>seq975</b>  | Firmicutes    | Clostridia    | 0                   | 0                    | 0                   | 0                    |
| <b>seq989</b>  | Firmicutes    | Clostridia    | 3                   | 5                    | 19                  | 13                   |
| <b>seq1048</b> | Firmicutes    | Clostridia    | 0                   | 0                    | 0                   | 0                    |
| <b>seq1111</b> | Firmicutes    | Clostridia    | 0                   | 0                    | 0                   | 0                    |
| <b>seq1151</b> | Firmicutes    | Clostridia    | 0                   | 0                    | 0                   | 0                    |
| <b>seq1178</b> | Firmicutes    | Clostridia    | 0                   | 0                    | 0                   | 0                    |

Sequence Count Table

|                | <b>Phylum</b> | <b>Class</b>  | <b>Subject17WK0</b> | <b>Subject17WK12</b> | <b>Subject1WK0</b> | <b>Subject1WK12</b> |
|----------------|---------------|---------------|---------------------|----------------------|--------------------|---------------------|
| <b>seq1669</b> | Firmicutes    | Negativicutes | 0                   | 0                    | 0                  | 0                   |
| <b>seq1723</b> | Firmicutes    | Negativicutes | 0                   | 0                    | 0                  | 0                   |
| <b>seq150</b>  | Firmicutes    | Negativicutes | 0                   | 0                    | 0                  | 0                   |
| <b>seq522</b>  | Firmicutes    | Negativicutes | 0                   | 0                    | 0                  | 0                   |
| <b>seq1631</b> | Firmicutes    | Negativicutes | 0                   | 0                    | 0                  | 0                   |
| <b>seq319</b>  | Firmicutes    | Negativicutes | 0                   | 0                    | 0                  | 0                   |
| <b>seq594</b>  | Firmicutes    | Negativicutes | 0                   | 48                   | 0                  | 0                   |
| <b>seq649</b>  | Firmicutes    | Negativicutes | 0                   | 41                   | 0                  | 0                   |
| <b>seq1415</b> | Firmicutes    | Negativicutes | 0                   | 0                    | 0                  | 0                   |
| <b>seq432</b>  | Firmicutes    | Negativicutes | 0                   | 0                    | 120                | 99                  |
| <b>seq608</b>  | Firmicutes    | Negativicutes | 0                   | 0                    | 0                  | 0                   |
| <b>seq155</b>  | Firmicutes    | Clostridia    | 0                   | 0                    | 0                  | 0                   |
| <b>seq242</b>  | Firmicutes    | Clostridia    | 0                   | 0                    | 0                  | 0                   |
| <b>seq287</b>  | Firmicutes    | Clostridia    | 0                   | 0                    | 0                  | 0                   |
| <b>seq411</b>  | Firmicutes    | Clostridia    | 37                  | 12                   | 149                | 218                 |
| <b>seq412</b>  | Firmicutes    | Clostridia    | 0                   | 0                    | 0                  | 0                   |
| <b>seq472</b>  | Firmicutes    |               | 15                  | 18                   | 0                  | 0                   |
| <b>seq534</b>  | Firmicutes    | Clostridia    | 27                  | 30                   | 226                | 253                 |
| <b>seq549</b>  | Firmicutes    | Clostridia    | 0                   | 0                    | 0                  | 0                   |
| <b>seq564</b>  | Firmicutes    | Clostridia    | 0                   | 0                    | 111                | 130                 |
| <b>seq588</b>  | Firmicutes    |               | 0                   | 0                    | 0                  | 0                   |
| <b>seq611</b>  | Firmicutes    | Clostridia    | 0                   | 0                    | 0                  | 0                   |
| <b>seq674</b>  | Firmicutes    |               | 79                  | 71                   | 0                  | 0                   |
| <b>seq742</b>  | Firmicutes    | Clostridia    | 0                   | 0                    | 0                  | 0                   |
| <b>seq793</b>  | Firmicutes    | Clostridia    | 0                   | 0                    | 0                  | 0                   |
| <b>seq971</b>  | Firmicutes    |               | 0                   | 0                    | 0                  | 0                   |
| <b>seq975</b>  | Firmicutes    | Clostridia    | 0                   | 0                    | 0                  | 0                   |
| <b>seq989</b>  | Firmicutes    | Clostridia    | 0                   | 0                    | 0                  | 0                   |
| <b>seq1048</b> | Firmicutes    | Clostridia    | 0                   | 0                    | 0                  | 0                   |
| <b>seq1111</b> | Firmicutes    | Clostridia    | 0                   | 0                    | 0                  | 0                   |
| <b>seq1151</b> | Firmicutes    | Clostridia    | 0                   | 0                    | 0                  | 0                   |
| <b>seq1178</b> | Firmicutes    | Clostridia    | 0                   | 0                    | 0                  | 0                   |

Sequence Count Table

|                | <b>Phylum</b> | <b>Class</b>  | <b>Subject2WK0</b> | <b>Subject2WK12</b> | <b>Subject3WK0</b> | <b>Subject3WK12</b> |
|----------------|---------------|---------------|--------------------|---------------------|--------------------|---------------------|
| <b>seq1669</b> | Firmicutes    | Negativicutes | 0                  | 0                   | 0                  | 0                   |
| <b>seq1723</b> | Firmicutes    | Negativicutes | 0                  | 11                  | 0                  | 0                   |
| <b>seq150</b>  | Firmicutes    | Negativicutes | 0                  | 0                   | 0                  | 0                   |
| <b>seq522</b>  | Firmicutes    | Negativicutes | 0                  | 0                   | 0                  | 0                   |
| <b>seq1631</b> | Firmicutes    | Negativicutes | 0                  | 0                   | 0                  | 0                   |
| <b>seq319</b>  | Firmicutes    | Negativicutes | 125                | 0                   | 0                  | 30                  |
| <b>seq594</b>  | Firmicutes    | Negativicutes | 0                  | 0                   | 62                 | 0                   |
| <b>seq649</b>  | Firmicutes    | Negativicutes | 0                  | 0                   | 0                  | 0                   |
| <b>seq1415</b> | Firmicutes    | Negativicutes | 0                  | 0                   | 0                  | 0                   |
| <b>seq432</b>  | Firmicutes    | Negativicutes | 0                  | 0                   | 0                  | 0                   |
| <b>seq608</b>  | Firmicutes    | Negativicutes | 0                  | 0                   | 0                  | 0                   |
| <b>seq155</b>  | Firmicutes    | Clostridia    | 0                  | 0                   | 0                  | 0                   |
| <b>seq242</b>  | Firmicutes    | Clostridia    | 0                  | 0                   | 0                  | 0                   |
| <b>seq287</b>  | Firmicutes    | Clostridia    | 0                  | 0                   | 0                  | 0                   |
| <b>seq411</b>  | Firmicutes    | Clostridia    | 0                  | 0                   | 0                  | 0                   |
| <b>seq412</b>  | Firmicutes    | Clostridia    | 0                  | 0                   | 458                | 67                  |
| <b>seq472</b>  | Firmicutes    |               | 33                 | 24                  | 0                  | 0                   |
| <b>seq534</b>  | Firmicutes    | Clostridia    | 0                  | 0                   | 0                  | 0                   |
| <b>seq549</b>  | Firmicutes    | Clostridia    | 0                  | 0                   | 0                  | 0                   |
| <b>seq564</b>  | Firmicutes    | Clostridia    | 0                  | 0                   | 0                  | 0                   |
| <b>seq588</b>  | Firmicutes    |               | 0                  | 0                   | 0                  | 0                   |
| <b>seq611</b>  | Firmicutes    | Clostridia    | 0                  | 0                   | 0                  | 0                   |
| <b>seq674</b>  | Firmicutes    |               | 0                  | 0                   | 0                  | 0                   |
| <b>seq742</b>  | Firmicutes    | Clostridia    | 0                  | 0                   | 0                  | 0                   |
| <b>seq793</b>  | Firmicutes    | Clostridia    | 0                  | 0                   | 0                  | 0                   |
| <b>seq971</b>  | Firmicutes    |               | 0                  | 0                   | 0                  | 0                   |
| <b>seq975</b>  | Firmicutes    | Clostridia    | 0                  | 0                   | 0                  | 0                   |
| <b>seq989</b>  | Firmicutes    | Clostridia    | 0                  | 0                   | 0                  | 0                   |
| <b>seq1048</b> | Firmicutes    | Clostridia    | 0                  | 0                   | 0                  | 0                   |
| <b>seq1111</b> | Firmicutes    | Clostridia    | 0                  | 0                   | 0                  | 0                   |
| <b>seq1151</b> | Firmicutes    | Clostridia    | 0                  | 0                   | 0                  | 0                   |
| <b>seq1178</b> | Firmicutes    | Clostridia    | 0                  | 0                   | 0                  | 0                   |



Sequence Count Table

|                | <b>Phylum</b> | <b>Class</b>  | <b>Subject4WK0</b> | <b>Subject4WK12</b> | <b>Subject5WK0</b> | <b>Subject5WK12</b> |
|----------------|---------------|---------------|--------------------|---------------------|--------------------|---------------------|
| <b>seq1669</b> | Firmicutes    | Negativicutes | 0                  | 0                   | 0                  | 0                   |
| <b>seq1723</b> | Firmicutes    | Negativicutes | 0                  | 0                   | 0                  | 0                   |
| <b>seq150</b>  | Firmicutes    | Negativicutes | 0                  | 0                   | 0                  | 0                   |
| <b>seq522</b>  | Firmicutes    | Negativicutes | 0                  | 0                   | 0                  | 0                   |
| <b>seq1631</b> | Firmicutes    | Negativicutes | 0                  | 0                   | 0                  | 17                  |
| <b>seq319</b>  | Firmicutes    | Negativicutes | 0                  | 0                   | 0                  | 0                   |
| <b>seq594</b>  | Firmicutes    | Negativicutes | 0                  | 0                   | 0                  | 0                   |
| <b>seq649</b>  | Firmicutes    | Negativicutes | 0                  | 0                   | 36                 | 0                   |
| <b>seq1415</b> | Firmicutes    | Negativicutes | 0                  | 0                   | 39                 | 0                   |
| <b>seq432</b>  | Firmicutes    | Negativicutes | 0                  | 0                   | 0                  | 0                   |
| <b>seq608</b>  | Firmicutes    | Negativicutes | 0                  | 0                   | 0                  | 0                   |
| <b>seq155</b>  | Firmicutes    | Clostridia    | 0                  | 0                   | 0                  | 0                   |
| <b>seq242</b>  | Firmicutes    | Clostridia    | 0                  | 0                   | 0                  | 0                   |
| <b>seq287</b>  | Firmicutes    | Clostridia    | 0                  | 0                   | 0                  | 0                   |
| <b>seq411</b>  | Firmicutes    | Clostridia    | 0                  | 0                   | 0                  | 0                   |
| <b>seq412</b>  | Firmicutes    | Clostridia    | 0                  | 0                   | 0                  | 0                   |
| <b>seq472</b>  | Firmicutes    |               | 65                 | 32                  | 0                  | 8                   |
| <b>seq534</b>  | Firmicutes    | Clostridia    | 0                  | 0                   | 0                  | 0                   |
| <b>seq549</b>  | Firmicutes    | Clostridia    | 0                  | 0                   | 0                  | 0                   |
| <b>seq564</b>  | Firmicutes    | Clostridia    | 0                  | 0                   | 0                  | 0                   |
| <b>seq588</b>  | Firmicutes    |               | 17                 | 0                   | 0                  | 0                   |
| <b>seq611</b>  | Firmicutes    | Clostridia    | 0                  | 0                   | 0                  | 0                   |
| <b>seq674</b>  | Firmicutes    |               | 0                  | 0                   | 0                  | 0                   |
| <b>seq742</b>  | Firmicutes    | Clostridia    | 0                  | 0                   | 0                  | 0                   |
| <b>seq793</b>  | Firmicutes    | Clostridia    | 0                  | 0                   | 0                  | 0                   |
| <b>seq971</b>  | Firmicutes    |               | 0                  | 0                   | 0                  | 0                   |
| <b>seq975</b>  | Firmicutes    | Clostridia    | 0                  | 0                   | 0                  | 0                   |
| <b>seq989</b>  | Firmicutes    | Clostridia    | 0                  | 0                   | 0                  | 0                   |
| <b>seq1048</b> | Firmicutes    | Clostridia    | 0                  | 0                   | 0                  | 0                   |
| <b>seq1111</b> | Firmicutes    | Clostridia    | 0                  | 0                   | 0                  | 0                   |
| <b>seq1151</b> | Firmicutes    | Clostridia    | 0                  | 0                   | 0                  | 0                   |
| <b>seq1178</b> | Firmicutes    | Clostridia    | 6                  | 0                   | 0                  | 0                   |

Sequence Count Table

|                | <b>Phylum</b> | <b>Class</b>  | <b>Subject6WK0</b> | <b>Subject6WK12</b> | <b>Subject18WK0</b> | <b>Subject18WK12</b> |
|----------------|---------------|---------------|--------------------|---------------------|---------------------|----------------------|
| <b>seq1669</b> | Firmicutes    | Negativicutes | 0                  | 0                   | 0                   | 0                    |
| <b>seq1723</b> | Firmicutes    | Negativicutes | 0                  | 0                   | 0                   | 0                    |
| <b>seq150</b>  | Firmicutes    | Negativicutes | 2518               | 4310                | 0                   | 0                    |
| <b>seq522</b>  | Firmicutes    | Negativicutes | 271                | 451                 | 0                   | 0                    |
| <b>seq1631</b> | Firmicutes    | Negativicutes | 0                  | 0                   | 0                   | 0                    |
| <b>seq319</b>  | Firmicutes    | Negativicutes | 0                  | 0                   | 10                  | 0                    |
| <b>seq594</b>  | Firmicutes    | Negativicutes | 0                  | 0                   | 0                   | 0                    |
| <b>seq649</b>  | Firmicutes    | Negativicutes | 0                  | 0                   | 0                   | 0                    |
| <b>seq1415</b> | Firmicutes    | Negativicutes | 0                  | 0                   | 0                   | 0                    |
| <b>seq432</b>  | Firmicutes    | Negativicutes | 0                  | 0                   | 0                   | 0                    |
| <b>seq608</b>  | Firmicutes    | Negativicutes | 0                  | 0                   | 0                   | 0                    |
| <b>seq155</b>  | Firmicutes    | Clostridia    | 839                | 1662                | 0                   | 0                    |
| <b>seq242</b>  | Firmicutes    | Clostridia    | 532                | 239                 | 0                   | 0                    |
| <b>seq287</b>  | Firmicutes    | Clostridia    | 1383               | 1090                | 0                   | 0                    |
| <b>seq411</b>  | Firmicutes    | Clostridia    | 0                  | 0                   | 0                   | 0                    |
| <b>seq412</b>  | Firmicutes    | Clostridia    | 0                  | 0                   | 0                   | 0                    |
| <b>seq472</b>  | Firmicutes    |               | 0                  | 0                   | 26                  | 20                   |
| <b>seq534</b>  | Firmicutes    | Clostridia    | 0                  | 0                   | 0                   | 0                    |
| <b>seq549</b>  | Firmicutes    | Clostridia    | 0                  | 0                   | 0                   | 0                    |
| <b>seq564</b>  | Firmicutes    | Clostridia    | 0                  | 0                   | 50                  | 0                    |
| <b>seq588</b>  | Firmicutes    |               | 12                 | 3                   | 0                   | 0                    |
| <b>seq611</b>  | Firmicutes    | Clostridia    | 0                  | 0                   | 0                   | 0                    |
| <b>seq674</b>  | Firmicutes    |               | 31                 | 46                  | 0                   | 0                    |
| <b>seq742</b>  | Firmicutes    | Clostridia    | 324                | 0                   | 0                   | 0                    |
| <b>seq793</b>  | Firmicutes    | Clostridia    | 0                  | 0                   | 0                   | 0                    |
| <b>seq971</b>  | Firmicutes    |               | 0                  | 0                   | 0                   | 0                    |
| <b>seq975</b>  | Firmicutes    | Clostridia    | 9                  | 0                   | 0                   | 0                    |
| <b>seq989</b>  | Firmicutes    | Clostridia    | 0                  | 4                   | 0                   | 0                    |
| <b>seq1048</b> | Firmicutes    | Clostridia    | 22                 | 7                   | 0                   | 0                    |
| <b>seq1111</b> | Firmicutes    | Clostridia    | 0                  | 0                   | 0                   | 0                    |
| <b>seq1151</b> | Firmicutes    | Clostridia    | 0                  | 11                  | 0                   | 0                    |
| <b>seq1178</b> | Firmicutes    | Clostridia    | 10                 | 33                  | 0                   | 0                    |

Sequence Count Table

|                | <b>Phylum</b> | <b>Class</b>  | <b>Subject19WK0</b> | <b>Subject19WK12</b> | <b>Subject20WK0</b> | <b>Subject20WK12</b> |
|----------------|---------------|---------------|---------------------|----------------------|---------------------|----------------------|
| <b>seq1669</b> | Firmicutes    | Negativicutes | 0                   | 0                    | 0                   | 0                    |
| <b>seq1723</b> | Firmicutes    | Negativicutes | 0                   | 0                    | 0                   | 0                    |
| <b>seq150</b>  | Firmicutes    | Negativicutes | 0                   | 0                    | 0                   | 0                    |
| <b>seq522</b>  | Firmicutes    | Negativicutes | 0                   | 0                    | 0                   | 0                    |
| <b>seq1631</b> | Firmicutes    | Negativicutes | 0                   | 0                    | 0                   | 0                    |
| <b>seq319</b>  | Firmicutes    | Negativicutes | 297                 | 0                    | 72                  | 216                  |
| <b>seq594</b>  | Firmicutes    | Negativicutes | 0                   | 35                   | 0                   | 0                    |
| <b>seq649</b>  | Firmicutes    | Negativicutes | 0                   | 59                   | 0                   | 0                    |
| <b>seq1415</b> | Firmicutes    | Negativicutes | 0                   | 0                    | 0                   | 0                    |
| <b>seq432</b>  | Firmicutes    | Negativicutes | 114                 | 274                  | 0                   | 0                    |
| <b>seq608</b>  | Firmicutes    | Negativicutes | 350                 | 170                  | 0                   | 0                    |
| <b>seq155</b>  | Firmicutes    | Clostridia    | 0                   | 0                    | 534                 | 396                  |
| <b>seq242</b>  | Firmicutes    | Clostridia    | 0                   | 0                    | 168                 | 36                   |
| <b>seq287</b>  | Firmicutes    | Clostridia    | 0                   | 0                    | 0                   | 20                   |
| <b>seq411</b>  | Firmicutes    | Clostridia    | 0                   | 0                    | 0                   | 0                    |
| <b>seq412</b>  | Firmicutes    | Clostridia    | 0                   | 0                    | 0                   | 0                    |
| <b>seq472</b>  | Firmicutes    |               | 16                  | 0                    | 0                   | 0                    |
| <b>seq534</b>  | Firmicutes    | Clostridia    | 0                   | 0                    | 0                   | 0                    |
| <b>seq549</b>  | Firmicutes    | Clostridia    | 0                   | 0                    | 0                   | 0                    |
| <b>seq564</b>  | Firmicutes    | Clostridia    | 0                   | 0                    | 0                   | 0                    |
| <b>seq588</b>  | Firmicutes    |               | 0                   | 0                    | 45                  | 0                    |
| <b>seq611</b>  | Firmicutes    | Clostridia    | 0                   | 0                    | 0                   | 0                    |
| <b>seq674</b>  | Firmicutes    |               | 0                   | 0                    | 0                   | 0                    |
| <b>seq742</b>  | Firmicutes    | Clostridia    | 0                   | 0                    | 0                   | 0                    |
| <b>seq793</b>  | Firmicutes    | Clostridia    | 0                   | 0                    | 0                   | 0                    |
| <b>seq971</b>  | Firmicutes    |               | 0                   | 0                    | 0                   | 0                    |
| <b>seq975</b>  | Firmicutes    | Clostridia    | 0                   | 0                    | 0                   | 0                    |
| <b>seq989</b>  | Firmicutes    | Clostridia    | 0                   | 0                    | 0                   | 7                    |
| <b>seq1048</b> | Firmicutes    | Clostridia    | 0                   | 0                    | 18                  | 0                    |
| <b>seq1111</b> | Firmicutes    | Clostridia    | 0                   | 0                    | 18                  | 5                    |
| <b>seq1151</b> | Firmicutes    | Clostridia    | 0                   | 0                    | 0                   | 0                    |
| <b>seq1178</b> | Firmicutes    | Clostridia    | 0                   | 0                    | 0                   | 0                    |

Sequence Count Table

|                | <b>Phylum</b> | <b>Class</b>  | <b>Subject7WK0</b> | <b>Subject7WK12</b> | <b>Subject21WK0</b> | <b>Subject21WK12</b> |
|----------------|---------------|---------------|--------------------|---------------------|---------------------|----------------------|
| <b>seq1669</b> | Firmicutes    | Negativicutes | 0                  | 0                   | 0                   | 0                    |
| <b>seq1723</b> | Firmicutes    | Negativicutes | 0                  | 0                   | 0                   | 0                    |
| <b>seq150</b>  | Firmicutes    | Negativicutes | 0                  | 0                   | 0                   | 0                    |
| <b>seq522</b>  | Firmicutes    | Negativicutes | 0                  | 0                   | 0                   | 0                    |
| <b>seq1631</b> | Firmicutes    | Negativicutes | 0                  | 0                   | 0                   | 0                    |
| <b>seq319</b>  | Firmicutes    | Negativicutes | 0                  | 77                  | 0                   | 0                    |
| <b>seq594</b>  | Firmicutes    | Negativicutes | 0                  | 0                   | 0                   | 0                    |
| <b>seq649</b>  | Firmicutes    | Negativicutes | 0                  | 0                   | 0                   | 0                    |
| <b>seq1415</b> | Firmicutes    | Negativicutes | 0                  | 0                   | 0                   | 0                    |
| <b>seq432</b>  | Firmicutes    | Negativicutes | 0                  | 0                   | 129                 | 85                   |
| <b>seq608</b>  | Firmicutes    | Negativicutes | 0                  | 0                   | 0                   | 0                    |
| <b>seq155</b>  | Firmicutes    | Clostridia    | 0                  | 0                   | 0                   | 0                    |
| <b>seq242</b>  | Firmicutes    | Clostridia    | 0                  | 0                   | 0                   | 0                    |
| <b>seq287</b>  | Firmicutes    | Clostridia    | 0                  | 0                   | 0                   | 0                    |
| <b>seq411</b>  | Firmicutes    | Clostridia    | 0                  | 0                   | 0                   | 0                    |
| <b>seq412</b>  | Firmicutes    | Clostridia    | 0                  | 0                   | 0                   | 0                    |
| <b>seq472</b>  | Firmicutes    |               | 57                 | 35                  | 0                   | 20                   |
| <b>seq534</b>  | Firmicutes    | Clostridia    | 8                  | 0                   | 0                   | 0                    |
| <b>seq549</b>  | Firmicutes    | Clostridia    | 0                  | 0                   | 0                   | 0                    |
| <b>seq564</b>  | Firmicutes    | Clostridia    | 0                  | 0                   | 0                   | 0                    |
| <b>seq588</b>  | Firmicutes    |               | 0                  | 0                   | 0                   | 0                    |
| <b>seq611</b>  | Firmicutes    | Clostridia    | 0                  | 0                   | 0                   | 0                    |
| <b>seq674</b>  | Firmicutes    |               | 0                  | 0                   | 0                   | 0                    |
| <b>seq742</b>  | Firmicutes    | Clostridia    | 0                  | 0                   | 0                   | 0                    |
| <b>seq793</b>  | Firmicutes    | Clostridia    | 0                  | 0                   | 0                   | 0                    |
| <b>seq971</b>  | Firmicutes    |               | 0                  | 0                   | 0                   | 0                    |
| <b>seq975</b>  | Firmicutes    | Clostridia    | 0                  | 0                   | 0                   | 0                    |
| <b>seq989</b>  | Firmicutes    | Clostridia    | 0                  | 0                   | 0                   | 0                    |
| <b>seq1048</b> | Firmicutes    | Clostridia    | 0                  | 0                   | 0                   | 0                    |
| <b>seq1111</b> | Firmicutes    | Clostridia    | 0                  | 0                   | 0                   | 0                    |
| <b>seq1151</b> | Firmicutes    | Clostridia    | 0                  | 0                   | 0                   | 0                    |
| <b>seq1178</b> | Firmicutes    | Clostridia    | 0                  | 0                   | 0                   | 0                    |

Sequence Count Table

|                | <b>Phylum</b> | <b>Class</b>  | <b>Subject8WK0</b> | <b>Subject8WK12</b> | <b>Subject9WK0</b> | <b>Subject9WK12</b> |
|----------------|---------------|---------------|--------------------|---------------------|--------------------|---------------------|
| <b>seq1669</b> | Firmicutes    | Negativicutes | 0                  | 0                   | 0                  | 0                   |
| <b>seq1723</b> | Firmicutes    | Negativicutes | 0                  | 0                   | 0                  | 0                   |
| <b>seq150</b>  | Firmicutes    | Negativicutes | 0                  | 0                   | 0                  | 0                   |
| <b>seq522</b>  | Firmicutes    | Negativicutes | 0                  | 0                   | 0                  | 0                   |
| <b>seq1631</b> | Firmicutes    | Negativicutes | 0                  | 0                   | 0                  | 0                   |
| <b>seq319</b>  | Firmicutes    | Negativicutes | 0                  | 0                   | 0                  | 72                  |
| <b>seq594</b>  | Firmicutes    | Negativicutes | 0                  | 0                   | 0                  | 0                   |
| <b>seq649</b>  | Firmicutes    | Negativicutes | 19                 | 0                   | 0                  | 0                   |
| <b>seq1415</b> | Firmicutes    | Negativicutes | 0                  | 0                   | 0                  | 0                   |
| <b>seq432</b>  | Firmicutes    | Negativicutes | 0                  | 0                   | 0                  | 0                   |
| <b>seq608</b>  | Firmicutes    | Negativicutes | 0                  | 0                   | 0                  | 0                   |
| <b>seq155</b>  | Firmicutes    | Clostridia    | 0                  | 0                   | 0                  | 0                   |
| <b>seq242</b>  | Firmicutes    | Clostridia    | 0                  | 0                   | 0                  | 0                   |
| <b>seq287</b>  | Firmicutes    | Clostridia    | 0                  | 0                   | 0                  | 0                   |
| <b>seq411</b>  | Firmicutes    | Clostridia    | 0                  | 0                   | 0                  | 0                   |
| <b>seq412</b>  | Firmicutes    | Clostridia    | 0                  | 0                   | 0                  | 0                   |
| <b>seq472</b>  | Firmicutes    |               | 24                 | 0                   | 0                  | 0                   |
| <b>seq534</b>  | Firmicutes    | Clostridia    | 0                  | 0                   | 0                  | 0                   |
| <b>seq549</b>  | Firmicutes    | Clostridia    | 0                  | 0                   | 0                  | 0                   |
| <b>seq564</b>  | Firmicutes    | Clostridia    | 0                  | 0                   | 0                  | 0                   |
| <b>seq588</b>  | Firmicutes    |               | 0                  | 0                   | 0                  | 0                   |
| <b>seq611</b>  | Firmicutes    | Clostridia    | 0                  | 0                   | 0                  | 0                   |
| <b>seq674</b>  | Firmicutes    |               | 0                  | 0                   | 0                  | 0                   |
| <b>seq742</b>  | Firmicutes    | Clostridia    | 0                  | 0                   | 0                  | 0                   |
| <b>seq793</b>  | Firmicutes    | Clostridia    | 0                  | 0                   | 0                  | 0                   |
| <b>seq971</b>  | Firmicutes    |               | 0                  | 0                   | 0                  | 0                   |
| <b>seq975</b>  | Firmicutes    | Clostridia    | 0                  | 0                   | 0                  | 0                   |
| <b>seq989</b>  | Firmicutes    | Clostridia    | 0                  | 0                   | 0                  | 0                   |
| <b>seq1048</b> | Firmicutes    | Clostridia    | 0                  | 0                   | 0                  | 0                   |
| <b>seq1111</b> | Firmicutes    | Clostridia    | 0                  | 0                   | 0                  | 0                   |
| <b>seq1151</b> | Firmicutes    | Clostridia    | 0                  | 0                   | 0                  | 0                   |
| <b>seq1178</b> | Firmicutes    | Clostridia    | 0                  | 0                   | 0                  | 0                   |

Sequence Count Table

|                | <b>Phylum</b> | <b>Class</b>  | <b>Subject10WK0</b> | <b>Subject10WK12</b> | <b>Subject22WK0</b> | <b>Subject22WK12</b> |
|----------------|---------------|---------------|---------------------|----------------------|---------------------|----------------------|
| <b>seq1669</b> | Firmicutes    | Negativicutes | 0                   | 0                    | 0                   | 0                    |
| <b>seq1723</b> | Firmicutes    | Negativicutes | 0                   | 0                    | 0                   | 0                    |
| <b>seq150</b>  | Firmicutes    | Negativicutes | 0                   | 0                    | 878                 | 898                  |
| <b>seq522</b>  | Firmicutes    | Negativicutes | 0                   | 0                    | 0                   | 0                    |
| <b>seq1631</b> | Firmicutes    | Negativicutes | 0                   | 0                    | 0                   | 0                    |
| <b>seq319</b>  | Firmicutes    | Negativicutes | 49                  | 17                   | 21                  | 37                   |
| <b>seq594</b>  | Firmicutes    | Negativicutes | 0                   | 0                    | 0                   | 0                    |
| <b>seq649</b>  | Firmicutes    | Negativicutes | 0                   | 0                    | 0                   | 0                    |
| <b>seq1415</b> | Firmicutes    | Negativicutes | 0                   | 0                    | 0                   | 0                    |
| <b>seq432</b>  | Firmicutes    | Negativicutes | 139                 | 82                   | 0                   | 0                    |
| <b>seq608</b>  | Firmicutes    | Negativicutes | 0                   | 0                    | 0                   | 0                    |
| <b>seq155</b>  | Firmicutes    | Clostridia    | 0                   | 0                    | 1573                | 1189                 |
| <b>seq242</b>  | Firmicutes    | Clostridia    | 0                   | 0                    | 1076                | 1136                 |
| <b>seq287</b>  | Firmicutes    | Clostridia    | 0                   | 0                    | 0                   | 0                    |
| <b>seq411</b>  | Firmicutes    | Clostridia    | 0                   | 0                    | 49                  | 736                  |
| <b>seq412</b>  | Firmicutes    | Clostridia    | 432                 | 141                  | 61                  | 34                   |
| <b>seq472</b>  | Firmicutes    |               | 0                   | 0                    | 84                  | 31                   |
| <b>seq534</b>  | Firmicutes    | Clostridia    | 48                  | 0                    | 0                   | 0                    |
| <b>seq549</b>  | Firmicutes    | Clostridia    | 0                   | 0                    | 0                   | 0                    |
| <b>seq564</b>  | Firmicutes    | Clostridia    | 21                  | 0                    | 19                  | 11                   |
| <b>seq588</b>  | Firmicutes    |               | 0                   | 0                    | 78                  | 269                  |
| <b>seq611</b>  | Firmicutes    | Clostridia    | 0                   | 0                    | 390                 | 0                    |
| <b>seq674</b>  | Firmicutes    |               | 0                   | 0                    | 31                  | 28                   |
| <b>seq742</b>  | Firmicutes    | Clostridia    | 0                   | 0                    | 0                   | 0                    |
| <b>seq793</b>  | Firmicutes    | Clostridia    | 0                   | 0                    | 0                   | 0                    |
| <b>seq971</b>  | Firmicutes    |               | 0                   | 0                    | 77                  | 78                   |
| <b>seq975</b>  | Firmicutes    | Clostridia    | 0                   | 0                    | 0                   | 0                    |
| <b>seq989</b>  | Firmicutes    | Clostridia    | 0                   | 0                    | 28                  | 49                   |
| <b>seq1048</b> | Firmicutes    | Clostridia    | 0                   | 0                    | 0                   | 0                    |
| <b>seq1111</b> | Firmicutes    | Clostridia    | 0                   | 0                    | 0                   | 0                    |
| <b>seq1151</b> | Firmicutes    | Clostridia    | 0                   | 0                    | 0                   | 0                    |
| <b>seq1178</b> | Firmicutes    | Clostridia    | 0                   | 0                    | 0                   | 0                    |

Sequence Count Table

|                | <b>Phylum</b> | <b>Class</b>  | <b>Subject23WK0</b> | <b>Subject23WK12</b> | <b>Subject24WK0</b> | <b>Subject24WK12</b> |
|----------------|---------------|---------------|---------------------|----------------------|---------------------|----------------------|
| <b>seq1669</b> | Firmicutes    | Negativicutes | 0                   | 0                    | 0                   | 0                    |
| <b>seq1723</b> | Firmicutes    | Negativicutes | 0                   | 0                    | 0                   | 0                    |
| <b>seq150</b>  | Firmicutes    | Negativicutes | 0                   | 0                    | 0                   | 0                    |
| <b>seq522</b>  | Firmicutes    | Negativicutes | 0                   | 0                    | 0                   | 0                    |
| <b>seq1631</b> | Firmicutes    | Negativicutes | 0                   | 0                    | 0                   | 0                    |
| <b>seq319</b>  | Firmicutes    | Negativicutes | 3                   | 0                    | 0                   | 0                    |
| <b>seq594</b>  | Firmicutes    | Negativicutes | 0                   | 0                    | 177                 | 0                    |
| <b>seq649</b>  | Firmicutes    | Negativicutes | 0                   | 25                   | 235                 | 47                   |
| <b>seq1415</b> | Firmicutes    | Negativicutes | 0                   | 0                    | 0                   | 0                    |
| <b>seq432</b>  | Firmicutes    | Negativicutes | 0                   | 0                    | 0                   | 0                    |
| <b>seq608</b>  | Firmicutes    | Negativicutes | 0                   | 0                    | 0                   | 0                    |
| <b>seq155</b>  | Firmicutes    | Clostridia    | 0                   | 302                  | 0                   | 0                    |
| <b>seq242</b>  | Firmicutes    | Clostridia    | 5                   | 50                   | 0                   | 0                    |
| <b>seq287</b>  | Firmicutes    | Clostridia    | 0                   | 0                    | 0                   | 0                    |
| <b>seq411</b>  | Firmicutes    | Clostridia    | 0                   | 0                    | 0                   | 0                    |
| <b>seq412</b>  | Firmicutes    | Clostridia    | 0                   | 0                    | 0                   | 0                    |
| <b>seq472</b>  | Firmicutes    |               | 14                  | 37                   | 0                   | 0                    |
| <b>seq534</b>  | Firmicutes    | Clostridia    | 0                   | 0                    | 6                   | 0                    |
| <b>seq549</b>  | Firmicutes    | Clostridia    | 80                  | 307                  | 0                   | 0                    |
| <b>seq564</b>  | Firmicutes    | Clostridia    | 0                   | 0                    | 0                   | 43                   |
| <b>seq588</b>  | Firmicutes    |               | 0                   | 0                    | 0                   | 0                    |
| <b>seq611</b>  | Firmicutes    | Clostridia    | 0                   | 0                    | 0                   | 0                    |
| <b>seq674</b>  | Firmicutes    |               | 0                   | 0                    | 13                  | 30                   |
| <b>seq742</b>  | Firmicutes    | Clostridia    | 0                   | 0                    | 0                   | 0                    |
| <b>seq793</b>  | Firmicutes    | Clostridia    | 0                   | 0                    | 0                   | 0                    |
| <b>seq971</b>  | Firmicutes    |               | 0                   | 0                    | 0                   | 0                    |
| <b>seq975</b>  | Firmicutes    | Clostridia    | 0                   | 0                    | 0                   | 0                    |
| <b>seq989</b>  | Firmicutes    | Clostridia    | 0                   | 6                    | 0                   | 0                    |
| <b>seq1048</b> | Firmicutes    | Clostridia    | 0                   | 13                   | 0                   | 24                   |
| <b>seq1111</b> | Firmicutes    | Clostridia    | 0                   | 0                    | 0                   | 0                    |
| <b>seq1151</b> | Firmicutes    | Clostridia    | 0                   | 0                    | 0                   | 0                    |
| <b>seq1178</b> | Firmicutes    | Clostridia    | 4                   | 33                   | 0                   | 0                    |

Sequence Count Table

|                | <b>Phylum</b> | <b>Class</b>  | <b>Subject11WK0</b> | <b>Subject11WK12</b> | <b>Subject12WK0</b> | <b>Subject12WK12</b> |
|----------------|---------------|---------------|---------------------|----------------------|---------------------|----------------------|
| <b>seq1669</b> | Firmicutes    | Negativicutes | 0                   | 0                    | 0                   | 0                    |
| <b>seq1723</b> | Firmicutes    | Negativicutes | 0                   | 0                    | 0                   | 0                    |
| <b>seq150</b>  | Firmicutes    | Negativicutes | 0                   | 0                    | 0                   | 0                    |
| <b>seq522</b>  | Firmicutes    | Negativicutes | 0                   | 0                    | 0                   | 0                    |
| <b>seq1631</b> | Firmicutes    | Negativicutes | 0                   | 0                    | 0                   | 0                    |
| <b>seq319</b>  | Firmicutes    | Negativicutes | 0                   | 77                   | 0                   | 0                    |
| <b>seq594</b>  | Firmicutes    | Negativicutes | 29                  | 0                    | 0                   | 0                    |
| <b>seq649</b>  | Firmicutes    | Negativicutes | 0                   | 0                    | 0                   | 0                    |
| <b>seq1415</b> | Firmicutes    | Negativicutes | 0                   | 0                    | 0                   | 0                    |
| <b>seq432</b>  | Firmicutes    | Negativicutes | 15                  | 20                   | 0                   | 0                    |
| <b>seq608</b>  | Firmicutes    | Negativicutes | 0                   | 0                    | 0                   | 0                    |
| <b>seq155</b>  | Firmicutes    | Clostridia    | 0                   | 0                    | 0                   | 0                    |
| <b>seq242</b>  | Firmicutes    | Clostridia    | 0                   | 0                    | 0                   | 0                    |
| <b>seq287</b>  | Firmicutes    | Clostridia    | 0                   | 0                    | 0                   | 0                    |
| <b>seq411</b>  | Firmicutes    | Clostridia    | 0                   | 0                    | 0                   | 0                    |
| <b>seq412</b>  | Firmicutes    | Clostridia    | 0                   | 0                    | 0                   | 0                    |
| <b>seq472</b>  | Firmicutes    |               | 33                  | 7                    | 0                   | 0                    |
| <b>seq534</b>  | Firmicutes    | Clostridia    | 0                   | 0                    | 0                   | 0                    |
| <b>seq549</b>  | Firmicutes    | Clostridia    | 0                   | 0                    | 0                   | 0                    |
| <b>seq564</b>  | Firmicutes    | Clostridia    | 0                   | 0                    | 15                  | 0                    |
| <b>seq588</b>  | Firmicutes    |               | 0                   | 0                    | 0                   | 0                    |
| <b>seq611</b>  | Firmicutes    | Clostridia    | 0                   | 0                    | 0                   | 0                    |
| <b>seq674</b>  | Firmicutes    |               | 0                   | 0                    | 0                   | 0                    |
| <b>seq742</b>  | Firmicutes    | Clostridia    | 0                   | 0                    | 0                   | 0                    |
| <b>seq793</b>  | Firmicutes    | Clostridia    | 0                   | 0                    | 0                   | 0                    |
| <b>seq971</b>  | Firmicutes    |               | 0                   | 0                    | 0                   | 0                    |
| <b>seq975</b>  | Firmicutes    | Clostridia    | 0                   | 0                    | 0                   | 0                    |
| <b>seq989</b>  | Firmicutes    | Clostridia    | 0                   | 0                    | 0                   | 0                    |
| <b>seq1048</b> | Firmicutes    | Clostridia    | 0                   | 0                    | 0                   | 0                    |
| <b>seq1111</b> | Firmicutes    | Clostridia    | 0                   | 0                    | 0                   | 0                    |
| <b>seq1151</b> | Firmicutes    | Clostridia    | 0                   | 0                    | 0                   | 0                    |
| <b>seq1178</b> | Firmicutes    | Clostridia    | 0                   | 0                    | 0                   | 0                    |



Sequence Count Table

|                | <b>Phylum</b> | <b>Class</b>  | <b>Subject25WK0</b> | <b>Subject25WK12</b> | <b>Subject38WK0</b> | <b>Subject38WK12</b> |
|----------------|---------------|---------------|---------------------|----------------------|---------------------|----------------------|
| <b>seq1669</b> | Firmicutes    | Negativicutes | 0                   | 0                    | 0                   | 0                    |
| <b>seq1723</b> | Firmicutes    | Negativicutes | 0                   | 0                    | 0                   | 0                    |
| <b>seq150</b>  | Firmicutes    | Negativicutes | 0                   | 0                    | 0                   | 0                    |
| <b>seq522</b>  | Firmicutes    | Negativicutes | 0                   | 0                    | 0                   | 0                    |
| <b>seq1631</b> | Firmicutes    | Negativicutes | 0                   | 0                    | 0                   | 0                    |
| <b>seq319</b>  | Firmicutes    | Negativicutes | 0                   | 0                    | 0                   | 0                    |
| <b>seq594</b>  | Firmicutes    | Negativicutes | 0                   | 0                    | 0                   | 0                    |
| <b>seq649</b>  | Firmicutes    | Negativicutes | 0                   | 0                    | 0                   | 0                    |
| <b>seq1415</b> | Firmicutes    | Negativicutes | 0                   | 0                    | 0                   | 0                    |
| <b>seq432</b>  | Firmicutes    | Negativicutes | 0                   | 0                    | 0                   | 0                    |
| <b>seq608</b>  | Firmicutes    | Negativicutes | 0                   | 0                    | 0                   | 0                    |
| <b>seq155</b>  | Firmicutes    | Clostridia    | 0                   | 0                    | 0                   | 0                    |
| <b>seq242</b>  | Firmicutes    | Clostridia    | 0                   | 0                    | 0                   | 0                    |
| <b>seq287</b>  | Firmicutes    | Clostridia    | 0                   | 0                    | 0                   | 0                    |
| <b>seq411</b>  | Firmicutes    | Clostridia    | 0                   | 0                    | 0                   | 0                    |
| <b>seq412</b>  | Firmicutes    | Clostridia    | 0                   | 0                    | 0                   | 0                    |
| <b>seq472</b>  | Firmicutes    |               | 63                  | 54                   | 0                   | 0                    |
| <b>seq534</b>  | Firmicutes    | Clostridia    | 0                   | 0                    | 0                   | 0                    |
| <b>seq549</b>  | Firmicutes    | Clostridia    | 0                   | 0                    | 0                   | 0                    |
| <b>seq564</b>  | Firmicutes    | Clostridia    | 160                 | 6                    | 0                   | 0                    |
| <b>seq588</b>  | Firmicutes    |               | 0                   | 0                    | 0                   | 0                    |
| <b>seq611</b>  | Firmicutes    | Clostridia    | 0                   | 0                    | 0                   | 0                    |
| <b>seq674</b>  | Firmicutes    |               | 69                  | 0                    | 0                   | 0                    |
| <b>seq742</b>  | Firmicutes    | Clostridia    | 0                   | 0                    | 0                   | 0                    |
| <b>seq793</b>  | Firmicutes    | Clostridia    | 0                   | 0                    | 0                   | 0                    |
| <b>seq971</b>  | Firmicutes    |               | 0                   | 0                    | 0                   | 0                    |
| <b>seq975</b>  | Firmicutes    | Clostridia    | 0                   | 0                    | 0                   | 0                    |
| <b>seq989</b>  | Firmicutes    | Clostridia    | 12                  | 0                    | 0                   | 0                    |
| <b>seq1048</b> | Firmicutes    | Clostridia    | 0                   | 0                    | 0                   | 0                    |
| <b>seq1111</b> | Firmicutes    | Clostridia    | 0                   | 0                    | 0                   | 0                    |
| <b>seq1151</b> | Firmicutes    | Clostridia    | 0                   | 0                    | 0                   | 0                    |
| <b>seq1178</b> | Firmicutes    | Clostridia    | 0                   | 0                    | 0                   | 0                    |

Sequence Count Table

|                | <b>Phylum</b> | <b>Class</b>  | <b>Subject31WK0</b> | <b>Subject31WK12</b> | <b>Subject32WK0</b> | <b>Subject32WK12</b> |
|----------------|---------------|---------------|---------------------|----------------------|---------------------|----------------------|
| <b>seq1669</b> | Firmicutes    | Negativicutes | 0                   | 0                    | 0                   | 0                    |
| <b>seq1723</b> | Firmicutes    | Negativicutes | 0                   | 0                    | 0                   | 0                    |
| <b>seq150</b>  | Firmicutes    | Negativicutes | 0                   | 0                    | 0                   | 0                    |
| <b>seq522</b>  | Firmicutes    | Negativicutes | 0                   | 0                    | 0                   | 0                    |
| <b>seq1631</b> | Firmicutes    | Negativicutes | 0                   | 0                    | 0                   | 0                    |
| <b>seq319</b>  | Firmicutes    | Negativicutes | 0                   | 0                    | 54                  | 0                    |
| <b>seq594</b>  | Firmicutes    | Negativicutes | 0                   | 0                    | 0                   | 0                    |
| <b>seq649</b>  | Firmicutes    | Negativicutes | 0                   | 0                    | 0                   | 0                    |
| <b>seq1415</b> | Firmicutes    | Negativicutes | 0                   | 0                    | 0                   | 0                    |
| <b>seq432</b>  | Firmicutes    | Negativicutes | 0                   | 0                    | 0                   | 0                    |
| <b>seq608</b>  | Firmicutes    | Negativicutes | 0                   | 0                    | 0                   | 0                    |
| <b>seq155</b>  | Firmicutes    | Clostridia    | 0                   | 0                    | 0                   | 0                    |
| <b>seq242</b>  | Firmicutes    | Clostridia    | 0                   | 0                    | 0                   | 0                    |
| <b>seq287</b>  | Firmicutes    | Clostridia    | 0                   | 0                    | 0                   | 0                    |
| <b>seq411</b>  | Firmicutes    | Clostridia    | 0                   | 0                    | 0                   | 0                    |
| <b>seq412</b>  | Firmicutes    | Clostridia    | 0                   | 0                    | 0                   | 0                    |
| <b>seq472</b>  | Firmicutes    |               | 0                   | 0                    | 0                   | 0                    |
| <b>seq534</b>  | Firmicutes    | Clostridia    | 0                   | 0                    | 0                   | 0                    |
| <b>seq549</b>  | Firmicutes    | Clostridia    | 0                   | 0                    | 0                   | 0                    |
| <b>seq564</b>  | Firmicutes    | Clostridia    | 0                   | 0                    | 0                   | 0                    |
| <b>seq588</b>  | Firmicutes    |               | 0                   | 0                    | 0                   | 0                    |
| <b>seq611</b>  | Firmicutes    | Clostridia    | 0                   | 0                    | 0                   | 0                    |
| <b>seq674</b>  | Firmicutes    |               | 0                   | 0                    | 0                   | 0                    |
| <b>seq742</b>  | Firmicutes    | Clostridia    | 0                   | 0                    | 0                   | 0                    |
| <b>seq793</b>  | Firmicutes    | Clostridia    | 0                   | 0                    | 0                   | 0                    |
| <b>seq971</b>  | Firmicutes    |               | 0                   | 0                    | 0                   | 0                    |
| <b>seq975</b>  | Firmicutes    | Clostridia    | 0                   | 0                    | 0                   | 0                    |
| <b>seq989</b>  | Firmicutes    | Clostridia    | 0                   | 0                    | 0                   | 0                    |
| <b>seq1048</b> | Firmicutes    | Clostridia    | 0                   | 0                    | 0                   | 0                    |
| <b>seq1111</b> | Firmicutes    | Clostridia    | 0                   | 0                    | 0                   | 0                    |
| <b>seq1151</b> | Firmicutes    | Clostridia    | 0                   | 0                    | 0                   | 0                    |
| <b>seq1178</b> | Firmicutes    | Clostridia    | 0                   | 0                    | 0                   | 0                    |

Sequence Count Table

|                | <b>Phylum</b> | <b>Class</b>  | <b>Subject13WK0</b> | <b>Subject13WK12</b> | <b>Subject39WK0</b> | <b>Subject39WK12</b> |
|----------------|---------------|---------------|---------------------|----------------------|---------------------|----------------------|
| <b>seq1669</b> | Firmicutes    | Negativicutes | 0                   | 0                    | 0                   | 0                    |
| <b>seq1723</b> | Firmicutes    | Negativicutes | 0                   | 0                    | 0                   | 0                    |
| <b>seq150</b>  | Firmicutes    | Negativicutes | 0                   | 0                    | 0                   | 0                    |
| <b>seq522</b>  | Firmicutes    | Negativicutes | 0                   | 0                    | 0                   | 0                    |
| <b>seq1631</b> | Firmicutes    | Negativicutes | 0                   | 0                    | 0                   | 0                    |
| <b>seq319</b>  | Firmicutes    | Negativicutes | 0                   | 0                    | 0                   | 24                   |
| <b>seq594</b>  | Firmicutes    | Negativicutes | 20                  | 0                    | 0                   | 0                    |
| <b>seq649</b>  | Firmicutes    | Negativicutes | 0                   | 0                    | 0                   | 0                    |
| <b>seq1415</b> | Firmicutes    | Negativicutes | 0                   | 0                    | 0                   | 0                    |
| <b>seq432</b>  | Firmicutes    | Negativicutes | 0                   | 0                    | 0                   | 0                    |
| <b>seq608</b>  | Firmicutes    | Negativicutes | 0                   | 0                    | 0                   | 0                    |
| <b>seq155</b>  | Firmicutes    | Clostridia    | 168                 | 1151                 | 0                   | 0                    |
| <b>seq242</b>  | Firmicutes    | Clostridia    | 129                 | 196                  | 0                   | 0                    |
| <b>seq287</b>  | Firmicutes    | Clostridia    | 0                   | 0                    | 0                   | 0                    |
| <b>seq411</b>  | Firmicutes    | Clostridia    | 0                   | 0                    | 0                   | 0                    |
| <b>seq412</b>  | Firmicutes    | Clostridia    | 0                   | 0                    | 0                   | 0                    |
| <b>seq472</b>  | Firmicutes    |               | 0                   | 0                    | 0                   | 0                    |
| <b>seq534</b>  | Firmicutes    | Clostridia    | 0                   | 0                    | 0                   | 8                    |
| <b>seq549</b>  | Firmicutes    | Clostridia    | 0                   | 0                    | 0                   | 0                    |
| <b>seq564</b>  | Firmicutes    | Clostridia    | 14                  | 0                    | 0                   | 0                    |
| <b>seq588</b>  | Firmicutes    |               | 96                  | 42                   | 0                   | 0                    |
| <b>seq611</b>  | Firmicutes    | Clostridia    | 71                  | 49                   | 0                   | 0                    |
| <b>seq674</b>  | Firmicutes    |               | 20                  | 0                    | 0                   | 0                    |
| <b>seq742</b>  | Firmicutes    | Clostridia    | 0                   | 0                    | 0                   | 0                    |
| <b>seq793</b>  | Firmicutes    | Clostridia    | 76                  | 204                  | 0                   | 0                    |
| <b>seq971</b>  | Firmicutes    |               | 0                   | 0                    | 0                   | 0                    |
| <b>seq975</b>  | Firmicutes    | Clostridia    | 124                 | 21                   | 0                   | 0                    |
| <b>seq989</b>  | Firmicutes    | Clostridia    | 0                   | 0                    | 0                   | 0                    |
| <b>seq1048</b> | Firmicutes    | Clostridia    | 15                  | 26                   | 0                   | 0                    |
| <b>seq1111</b> | Firmicutes    | Clostridia    | 52                  | 28                   | 0                   | 0                    |
| <b>seq1151</b> | Firmicutes    | Clostridia    | 0                   | 0                    | 0                   | 0                    |
| <b>seq1178</b> | Firmicutes    | Clostridia    | 0                   | 0                    | 0                   | 0                    |

Sequence Count Table

|                | <b>Phylum</b> | <b>Class</b>  | <b>Subject26WK0</b> | <b>Subject26WK12</b> | <b>Subject14WK0</b> | <b>Subject14WK12</b> |
|----------------|---------------|---------------|---------------------|----------------------|---------------------|----------------------|
| <b>seq1669</b> | Firmicutes    | Negativicutes | 15                  | 0                    | 0                   | 0                    |
| <b>seq1723</b> | Firmicutes    | Negativicutes | 0                   | 0                    | 0                   | 0                    |
| <b>seq150</b>  | Firmicutes    | Negativicutes | 0                   | 0                    | 0                   | 0                    |
| <b>seq522</b>  | Firmicutes    | Negativicutes | 0                   | 0                    | 0                   | 0                    |
| <b>seq1631</b> | Firmicutes    | Negativicutes | 0                   | 0                    | 0                   | 0                    |
| <b>seq319</b>  | Firmicutes    | Negativicutes | 0                   | 0                    | 110                 | 0                    |
| <b>seq594</b>  | Firmicutes    | Negativicutes | 0                   | 0                    | 0                   | 0                    |
| <b>seq649</b>  | Firmicutes    | Negativicutes | 0                   | 0                    | 0                   | 0                    |
| <b>seq1415</b> | Firmicutes    | Negativicutes | 0                   | 0                    | 0                   | 0                    |
| <b>seq432</b>  | Firmicutes    | Negativicutes | 0                   | 0                    | 0                   | 0                    |
| <b>seq608</b>  | Firmicutes    | Negativicutes | 0                   | 0                    | 0                   | 0                    |
| <b>seq155</b>  | Firmicutes    | Clostridia    | 0                   | 0                    | 0                   | 0                    |
| <b>seq242</b>  | Firmicutes    | Clostridia    | 0                   | 0                    | 0                   | 0                    |
| <b>seq287</b>  | Firmicutes    | Clostridia    | 0                   | 0                    | 0                   | 0                    |
| <b>seq411</b>  | Firmicutes    | Clostridia    | 0                   | 0                    | 0                   | 0                    |
| <b>seq412</b>  | Firmicutes    | Clostridia    | 0                   | 0                    | 0                   | 0                    |
| <b>seq472</b>  | Firmicutes    |               | 56                  | 41                   | 12                  | 51                   |
| <b>seq534</b>  | Firmicutes    | Clostridia    | 32                  | 15                   | 7                   | 16                   |
| <b>seq549</b>  | Firmicutes    | Clostridia    | 0                   | 0                    | 0                   | 0                    |
| <b>seq564</b>  | Firmicutes    | Clostridia    | 0                   | 0                    | 0                   | 0                    |
| <b>seq588</b>  | Firmicutes    |               | 0                   | 0                    | 0                   | 0                    |
| <b>seq611</b>  | Firmicutes    | Clostridia    | 0                   | 0                    | 0                   | 0                    |
| <b>seq674</b>  | Firmicutes    |               | 0                   | 0                    | 0                   | 0                    |
| <b>seq742</b>  | Firmicutes    | Clostridia    | 0                   | 0                    | 0                   | 0                    |
| <b>seq793</b>  | Firmicutes    | Clostridia    | 0                   | 0                    | 0                   | 0                    |
| <b>seq971</b>  | Firmicutes    |               | 0                   | 0                    | 0                   | 0                    |
| <b>seq975</b>  | Firmicutes    | Clostridia    | 0                   | 0                    | 0                   | 0                    |
| <b>seq989</b>  | Firmicutes    | Clostridia    | 0                   | 0                    | 0                   | 0                    |
| <b>seq1048</b> | Firmicutes    | Clostridia    | 0                   | 0                    | 0                   | 0                    |
| <b>seq1111</b> | Firmicutes    | Clostridia    | 0                   | 0                    | 0                   | 0                    |
| <b>seq1151</b> | Firmicutes    | Clostridia    | 41                  | 40                   | 0                   | 0                    |
| <b>seq1178</b> | Firmicutes    | Clostridia    | 0                   | 0                    | 0                   | 0                    |

Sequence Count Table

|                | <b>Phylum</b> | <b>Class</b>  | <b>Subject27WK0</b> | <b>Subject27WK12</b> | <b>Subject15WK0</b> | <b>Subject15WK12</b> |
|----------------|---------------|---------------|---------------------|----------------------|---------------------|----------------------|
| <b>seq1669</b> | Firmicutes    | Negativicutes | 0                   | 0                    | 0                   | 0                    |
| <b>seq1723</b> | Firmicutes    | Negativicutes | 0                   | 0                    | 0                   | 0                    |
| <b>seq150</b>  | Firmicutes    | Negativicutes | 0                   | 0                    | 0                   | 0                    |
| <b>seq522</b>  | Firmicutes    | Negativicutes | 0                   | 0                    | 0                   | 0                    |
| <b>seq1631</b> | Firmicutes    | Negativicutes | 0                   | 0                    | 0                   | 0                    |
| <b>seq319</b>  | Firmicutes    | Negativicutes | 18                  | 266                  | 30                  | 0                    |
| <b>seq594</b>  | Firmicutes    | Negativicutes | 0                   | 167                  | 0                   | 0                    |
| <b>seq649</b>  | Firmicutes    | Negativicutes | 0                   | 0                    | 0                   | 0                    |
| <b>seq1415</b> | Firmicutes    | Negativicutes | 0                   | 0                    | 0                   | 0                    |
| <b>seq432</b>  | Firmicutes    | Negativicutes | 14                  | 0                    | 0                   | 0                    |
| <b>seq608</b>  | Firmicutes    | Negativicutes | 0                   | 0                    | 0                   | 0                    |
| <b>seq155</b>  | Firmicutes    | Clostridia    | 0                   | 0                    | 0                   | 0                    |
| <b>seq242</b>  | Firmicutes    | Clostridia    | 0                   | 0                    | 0                   | 0                    |
| <b>seq287</b>  | Firmicutes    | Clostridia    | 0                   | 0                    | 0                   | 0                    |
| <b>seq411</b>  | Firmicutes    | Clostridia    | 0                   | 0                    | 0                   | 0                    |
| <b>seq412</b>  | Firmicutes    | Clostridia    | 0                   | 0                    | 0                   | 0                    |
| <b>seq472</b>  | Firmicutes    |               | 0                   | 0                    | 0                   | 0                    |
| <b>seq534</b>  | Firmicutes    | Clostridia    | 0                   | 0                    | 0                   | 0                    |
| <b>seq549</b>  | Firmicutes    | Clostridia    | 0                   | 144                  | 0                   | 0                    |
| <b>seq564</b>  | Firmicutes    | Clostridia    | 0                   | 0                    | 0                   | 0                    |
| <b>seq588</b>  | Firmicutes    |               | 0                   | 0                    | 0                   | 0                    |
| <b>seq611</b>  | Firmicutes    | Clostridia    | 0                   | 0                    | 0                   | 0                    |
| <b>seq674</b>  | Firmicutes    |               | 0                   | 0                    | 0                   | 0                    |
| <b>seq742</b>  | Firmicutes    | Clostridia    | 0                   | 0                    | 0                   | 0                    |
| <b>seq793</b>  | Firmicutes    | Clostridia    | 0                   | 0                    | 0                   | 0                    |
| <b>seq971</b>  | Firmicutes    |               | 0                   | 0                    | 0                   | 0                    |
| <b>seq975</b>  | Firmicutes    | Clostridia    | 0                   | 0                    | 0                   | 0                    |
| <b>seq989</b>  | Firmicutes    | Clostridia    | 0                   | 0                    | 0                   | 0                    |
| <b>seq1048</b> | Firmicutes    | Clostridia    | 0                   | 0                    | 0                   | 0                    |
| <b>seq1111</b> | Firmicutes    | Clostridia    | 0                   | 0                    | 0                   | 0                    |
| <b>seq1151</b> | Firmicutes    | Clostridia    | 0                   | 0                    | 0                   | 0                    |
| <b>seq1178</b> | Firmicutes    | Clostridia    | 0                   | 0                    | 0                   | 0                    |

Sequence Count Table

|                | <b>Phylum</b> | <b>Class</b>  | <b>Δ</b> |  |  |  |
|----------------|---------------|---------------|----------|--|--|--|
| <b>seq1669</b> | Firmicutes    | Negativicutes |          |  |  |  |
| <b>seq1723</b> | Firmicutes    | Negativicutes |          |  |  |  |
| <b>seq150</b>  | Firmicutes    | Negativicutes |          |  |  |  |
| <b>seq522</b>  | Firmicutes    | Negativicutes |          |  |  |  |
| <b>seq1631</b> | Firmicutes    | Negativicutes |          |  |  |  |
| <b>seq319</b>  | Firmicutes    | Negativicutes |          |  |  |  |
| <b>seq594</b>  | Firmicutes    | Negativicutes |          |  |  |  |
| <b>seq649</b>  | Firmicutes    | Negativicutes |          |  |  |  |
| <b>seq1415</b> | Firmicutes    | Negativicutes |          |  |  |  |
| <b>seq432</b>  | Firmicutes    | Negativicutes |          |  |  |  |
| <b>seq608</b>  | Firmicutes    | Negativicutes |          |  |  |  |
| <b>seq155</b>  | Firmicutes    | Clostridia    |          |  |  |  |
| <b>seq242</b>  | Firmicutes    | Clostridia    |          |  |  |  |
| <b>seq287</b>  | Firmicutes    | Clostridia    |          |  |  |  |
| <b>seq411</b>  | Firmicutes    | Clostridia    |          |  |  |  |
| <b>seq412</b>  | Firmicutes    | Clostridia    |          |  |  |  |
| <b>seq472</b>  | Firmicutes    |               |          |  |  |  |
| <b>seq534</b>  | Firmicutes    | Clostridia    |          |  |  |  |
| <b>seq549</b>  | Firmicutes    | Clostridia    |          |  |  |  |
| <b>seq564</b>  | Firmicutes    | Clostridia    |          |  |  |  |
| <b>seq588</b>  | Firmicutes    |               |          |  |  |  |
| <b>seq611</b>  | Firmicutes    | Clostridia    |          |  |  |  |
| <b>seq674</b>  | Firmicutes    |               |          |  |  |  |
| <b>seq742</b>  | Firmicutes    | Clostridia    |          |  |  |  |
| <b>seq793</b>  | Firmicutes    | Clostridia    |          |  |  |  |
| <b>seq971</b>  | Firmicutes    |               |          |  |  |  |
| <b>seq975</b>  | Firmicutes    | Clostridia    |          |  |  |  |
| <b>seq989</b>  | Firmicutes    | Clostridia    |          |  |  |  |
| <b>seq1048</b> | Firmicutes    | Clostridia    |          |  |  |  |
| <b>seq1111</b> | Firmicutes    | Clostridia    |          |  |  |  |
| <b>seq1151</b> | Firmicutes    | Clostridia    |          |  |  |  |
| <b>seq1178</b> | Firmicutes    | Clostridia    |          |  |  |  |

Sequence Count Table

|                | <b>Phylum</b> | <b>Class</b> | <b>Order</b>  | <b>Family</b> |
|----------------|---------------|--------------|---------------|---------------|
| <b>seq1215</b> | Firmicutes    | Clostridia   | Clostridiales |               |
| <b>seq1221</b> | Firmicutes    | Clostridia   | Clostridiales |               |
| <b>seq1269</b> | Firmicutes    | Clostridia   | Clostridiales |               |
| <b>seq1288</b> | Firmicutes    | Clostridia   | Clostridiales |               |
| <b>seq1298</b> | Firmicutes    | Clostridia   |               |               |
| <b>seq1345</b> | Firmicutes    |              |               |               |
| <b>seq1370</b> | Firmicutes    | Clostridia   | Clostridiales |               |
| <b>seq1371</b> | Firmicutes    | Clostridia   | Clostridiales |               |
| <b>seq1385</b> | Firmicutes    | Clostridia   | Clostridiales |               |
| <b>seq1436</b> | Firmicutes    | Clostridia   |               |               |
| <b>seq1457</b> | Firmicutes    | Clostridia   | Clostridiales |               |
| <b>seq1468</b> | Firmicutes    | Clostridia   |               |               |
| <b>seq1490</b> | Firmicutes    | Clostridia   |               |               |
| <b>seq1542</b> | Firmicutes    | Clostridia   | Clostridiales |               |
| <b>seq1547</b> | Firmicutes    | Clostridia   | Clostridiales |               |
| <b>seq1562</b> | Firmicutes    | Clostridia   |               |               |
| <b>seq1635</b> | Firmicutes    | Clostridia   | Clostridiales |               |
| <b>seq1647</b> | Firmicutes    | Clostridia   | Clostridiales |               |
| <b>seq1658</b> | Firmicutes    | Clostridia   | Clostridiales |               |
| <b>seq1660</b> | Firmicutes    |              |               |               |
| <b>seq1665</b> | Firmicutes    |              |               |               |
| <b>seq1681</b> | Firmicutes    | Clostridia   | Clostridiales |               |
| <b>seq1694</b> | Firmicutes    |              |               |               |
| <b>seq1698</b> | Firmicutes    | Clostridia   | Clostridiales |               |
| <b>seq1700</b> | Firmicutes    |              |               |               |
| <b>seq1719</b> | Firmicutes    | Clostridia   |               |               |
| <b>seq1721</b> | Firmicutes    | Clostridia   | Clostridiales |               |
| <b>seq1756</b> | Firmicutes    | Clostridia   | Clostridiales |               |
| <b>seq1810</b> | Firmicutes    | Clostridia   | Clostridiales |               |
| <b>seq1815</b> | Firmicutes    | Clostridia   | Clostridiales |               |
| <b>seq1843</b> | Firmicutes    | Clostridia   | Clostridiales |               |
| <b>seq1844</b> | Firmicutes    | Clostridia   | Clostridiales |               |

Sequence Count Table

|                | <b>Phylum</b> | <b>Class</b> | <b>Genus</b> | <b>Species</b> |
|----------------|---------------|--------------|--------------|----------------|
| <b>seq1215</b> | Firmicutes    | Clostridia   |              |                |
| <b>seq1221</b> | Firmicutes    | Clostridia   |              |                |
| <b>seq1269</b> | Firmicutes    | Clostridia   |              |                |
| <b>seq1288</b> | Firmicutes    | Clostridia   |              |                |
| <b>seq1298</b> | Firmicutes    | Clostridia   |              |                |
| <b>seq1345</b> | Firmicutes    |              |              |                |
| <b>seq1370</b> | Firmicutes    | Clostridia   |              |                |
| <b>seq1371</b> | Firmicutes    | Clostridia   |              |                |
| <b>seq1385</b> | Firmicutes    | Clostridia   |              |                |
| <b>seq1436</b> | Firmicutes    | Clostridia   |              |                |
| <b>seq1457</b> | Firmicutes    | Clostridia   |              |                |
| <b>seq1468</b> | Firmicutes    | Clostridia   |              |                |
| <b>seq1490</b> | Firmicutes    | Clostridia   |              |                |
| <b>seq1542</b> | Firmicutes    | Clostridia   |              |                |
| <b>seq1547</b> | Firmicutes    | Clostridia   |              |                |
| <b>seq1562</b> | Firmicutes    | Clostridia   |              |                |
| <b>seq1635</b> | Firmicutes    | Clostridia   |              |                |
| <b>seq1647</b> | Firmicutes    | Clostridia   |              |                |
| <b>seq1658</b> | Firmicutes    | Clostridia   |              |                |
| <b>seq1660</b> | Firmicutes    |              |              |                |
| <b>seq1665</b> | Firmicutes    |              |              |                |
| <b>seq1681</b> | Firmicutes    | Clostridia   |              |                |
| <b>seq1694</b> | Firmicutes    |              |              |                |
| <b>seq1698</b> | Firmicutes    | Clostridia   |              |                |
| <b>seq1700</b> | Firmicutes    |              |              |                |
| <b>seq1719</b> | Firmicutes    | Clostridia   |              |                |
| <b>seq1721</b> | Firmicutes    | Clostridia   |              |                |
| <b>seq1756</b> | Firmicutes    | Clostridia   |              |                |
| <b>seq1810</b> | Firmicutes    | Clostridia   |              |                |
| <b>seq1815</b> | Firmicutes    | Clostridia   |              |                |
| <b>seq1843</b> | Firmicutes    | Clostridia   |              |                |
| <b>seq1844</b> | Firmicutes    | Clostridia   |              |                |



Sequence Count Table

|                | <b>Phylum</b> | <b>Class</b> | <b>Subject34WK0</b> | <b>Subject34WK12</b> | <b>Subject16WK0</b> | <b>Subject16WK12</b> |
|----------------|---------------|--------------|---------------------|----------------------|---------------------|----------------------|
| <b>seq1215</b> | Firmicutes    | Clostridia   | 0                   | 0                    | 0                   | 0                    |
| <b>seq1221</b> | Firmicutes    | Clostridia   | 0                   | 0                    | 0                   | 0                    |
| <b>seq1269</b> | Firmicutes    | Clostridia   | 0                   | 0                    | 0                   | 0                    |
| <b>seq1288</b> | Firmicutes    | Clostridia   | 0                   | 0                    | 0                   | 0                    |
| <b>seq1298</b> | Firmicutes    | Clostridia   | 0                   | 0                    | 0                   | 0                    |
| <b>seq1345</b> | Firmicutes    |              | 0                   | 0                    | 0                   | 0                    |
| <b>seq1370</b> | Firmicutes    | Clostridia   | 0                   | 0                    | 0                   | 0                    |
| <b>seq1371</b> | Firmicutes    | Clostridia   | 0                   | 0                    | 0                   | 0                    |
| <b>seq1385</b> | Firmicutes    | Clostridia   | 0                   | 0                    | 0                   | 0                    |
| <b>seq1436</b> | Firmicutes    | Clostridia   | 0                   | 0                    | 12                  | 16                   |
| <b>seq1457</b> | Firmicutes    | Clostridia   | 0                   | 0                    | 0                   | 0                    |
| <b>seq1468</b> | Firmicutes    | Clostridia   | 0                   | 0                    | 0                   | 0                    |
| <b>seq1490</b> | Firmicutes    | Clostridia   | 0                   | 0                    | 4                   | 25                   |
| <b>seq1542</b> | Firmicutes    | Clostridia   | 0                   | 0                    | 0                   | 24                   |
| <b>seq1547</b> | Firmicutes    | Clostridia   | 0                   | 0                    | 0                   | 0                    |
| <b>seq1562</b> | Firmicutes    | Clostridia   | 0                   | 0                    | 0                   | 0                    |
| <b>seq1635</b> | Firmicutes    | Clostridia   | 0                   | 0                    | 0                   | 0                    |
| <b>seq1647</b> | Firmicutes    | Clostridia   | 0                   | 0                    | 0                   | 0                    |
| <b>seq1658</b> | Firmicutes    | Clostridia   | 0                   | 0                    | 0                   | 0                    |
| <b>seq1660</b> | Firmicutes    |              | 0                   | 0                    | 0                   | 0                    |
| <b>seq1665</b> | Firmicutes    |              | 0                   | 0                    | 0                   | 0                    |
| <b>seq1681</b> | Firmicutes    | Clostridia   | 0                   | 0                    | 0                   | 0                    |
| <b>seq1694</b> | Firmicutes    |              | 0                   | 0                    | 0                   | 0                    |
| <b>seq1698</b> | Firmicutes    | Clostridia   | 0                   | 0                    | 0                   | 0                    |
| <b>seq1700</b> | Firmicutes    |              | 0                   | 0                    | 0                   | 0                    |
| <b>seq1719</b> | Firmicutes    | Clostridia   | 0                   | 0                    | 0                   | 0                    |
| <b>seq1721</b> | Firmicutes    | Clostridia   | 0                   | 6                    | 0                   | 0                    |
| <b>seq1756</b> | Firmicutes    | Clostridia   | 0                   | 0                    | 0                   | 0                    |
| <b>seq1810</b> | Firmicutes    | Clostridia   | 0                   | 0                    | 0                   | 0                    |
| <b>seq1815</b> | Firmicutes    | Clostridia   | 0                   | 0                    | 0                   | 0                    |
| <b>seq1843</b> | Firmicutes    | Clostridia   | 0                   | 0                    | 0                   | 0                    |
| <b>seq1844</b> | Firmicutes    | Clostridia   | 0                   | 0                    | 5                   | 0                    |

Sequence Count Table

|                | <b>Phylum</b> | <b>Class</b> | <b>Subject17WK0</b> | <b>Subject17WK12</b> | <b>Subject1WK0</b> | <b>Subject1WK12</b> |
|----------------|---------------|--------------|---------------------|----------------------|--------------------|---------------------|
| <b>seq1215</b> | Firmicutes    | Clostridia   | 0                   | 0                    | 0                  | 0                   |
| <b>seq1221</b> | Firmicutes    | Clostridia   | 0                   | 0                    | 0                  | 0                   |
| <b>seq1269</b> | Firmicutes    | Clostridia   | 2                   | 2                    | 0                  | 0                   |
| <b>seq1288</b> | Firmicutes    | Clostridia   | 0                   | 0                    | 0                  | 0                   |
| <b>seq1298</b> | Firmicutes    | Clostridia   | 0                   | 0                    | 0                  | 0                   |
| <b>seq1345</b> | Firmicutes    |              | 0                   | 0                    | 0                  | 0                   |
| <b>seq1370</b> | Firmicutes    | Clostridia   | 13                  | 19                   | 0                  | 0                   |
| <b>seq1371</b> | Firmicutes    | Clostridia   | 0                   | 0                    | 0                  | 0                   |
| <b>seq1385</b> | Firmicutes    | Clostridia   | 0                   | 0                    | 0                  | 0                   |
| <b>seq1436</b> | Firmicutes    | Clostridia   | 0                   | 0                    | 0                  | 0                   |
| <b>seq1457</b> | Firmicutes    | Clostridia   | 0                   | 0                    | 0                  | 9                   |
| <b>seq1468</b> | Firmicutes    | Clostridia   | 0                   | 0                    | 0                  | 0                   |
| <b>seq1490</b> | Firmicutes    | Clostridia   | 0                   | 0                    | 0                  | 0                   |
| <b>seq1542</b> | Firmicutes    | Clostridia   | 0                   | 0                    | 0                  | 0                   |
| <b>seq1547</b> | Firmicutes    | Clostridia   | 0                   | 0                    | 0                  | 0                   |
| <b>seq1562</b> | Firmicutes    | Clostridia   | 0                   | 0                    | 0                  | 0                   |
| <b>seq1635</b> | Firmicutes    | Clostridia   | 0                   | 0                    | 0                  | 0                   |
| <b>seq1647</b> | Firmicutes    | Clostridia   | 0                   | 0                    | 0                  | 0                   |
| <b>seq1658</b> | Firmicutes    | Clostridia   | 0                   | 0                    | 0                  | 0                   |
| <b>seq1660</b> | Firmicutes    |              | 0                   | 0                    | 0                  | 0                   |
| <b>seq1665</b> | Firmicutes    |              | 0                   | 0                    | 0                  | 0                   |
| <b>seq1681</b> | Firmicutes    | Clostridia   | 0                   | 0                    | 0                  | 0                   |
| <b>seq1694</b> | Firmicutes    |              | 0                   | 0                    | 0                  | 0                   |
| <b>seq1698</b> | Firmicutes    | Clostridia   | 0                   | 0                    | 0                  | 0                   |
| <b>seq1700</b> | Firmicutes    |              | 0                   | 0                    | 0                  | 0                   |
| <b>seq1719</b> | Firmicutes    | Clostridia   | 0                   | 0                    | 0                  | 0                   |
| <b>seq1721</b> | Firmicutes    | Clostridia   | 0                   | 0                    | 0                  | 0                   |
| <b>seq1756</b> | Firmicutes    | Clostridia   | 0                   | 0                    | 0                  | 0                   |
| <b>seq1810</b> | Firmicutes    | Clostridia   | 0                   | 0                    | 0                  | 0                   |
| <b>seq1815</b> | Firmicutes    | Clostridia   | 0                   | 0                    | 0                  | 0                   |
| <b>seq1843</b> | Firmicutes    | Clostridia   | 0                   | 0                    | 0                  | 0                   |
| <b>seq1844</b> | Firmicutes    | Clostridia   | 0                   | 0                    | 0                  | 0                   |

Sequence Count Table

|                | <b>Phylum</b> | <b>Class</b> | <b>Subject2WK0</b> | <b>Subject2WK12</b> | <b>Subject3WK0</b> | <b>Subject3WK12</b> |
|----------------|---------------|--------------|--------------------|---------------------|--------------------|---------------------|
| <b>seq1215</b> | Firmicutes    | Clostridia   | 0                  | 0                   | 0                  | 0                   |
| <b>seq1221</b> | Firmicutes    | Clostridia   | 0                  | 0                   | 0                  | 0                   |
| <b>seq1269</b> | Firmicutes    | Clostridia   | 0                  | 0                   | 0                  | 0                   |
| <b>seq1288</b> | Firmicutes    | Clostridia   | 0                  | 0                   | 0                  | 0                   |
| <b>seq1298</b> | Firmicutes    | Clostridia   | 0                  | 0                   | 0                  | 0                   |
| <b>seq1345</b> | Firmicutes    |              | 0                  | 0                   | 0                  | 0                   |
| <b>seq1370</b> | Firmicutes    | Clostridia   | 0                  | 0                   | 0                  | 0                   |
| <b>seq1371</b> | Firmicutes    | Clostridia   | 0                  | 0                   | 0                  | 0                   |
| <b>seq1385</b> | Firmicutes    | Clostridia   | 0                  | 0                   | 0                  | 0                   |
| <b>seq1436</b> | Firmicutes    | Clostridia   | 0                  | 0                   | 0                  | 0                   |
| <b>seq1457</b> | Firmicutes    | Clostridia   | 0                  | 0                   | 0                  | 0                   |
| <b>seq1468</b> | Firmicutes    | Clostridia   | 0                  | 0                   | 0                  | 0                   |
| <b>seq1490</b> | Firmicutes    | Clostridia   | 0                  | 0                   | 0                  | 0                   |
| <b>seq1542</b> | Firmicutes    | Clostridia   | 0                  | 0                   | 0                  | 0                   |
| <b>seq1547</b> | Firmicutes    | Clostridia   | 0                  | 0                   | 0                  | 0                   |
| <b>seq1562</b> | Firmicutes    | Clostridia   | 0                  | 0                   | 0                  | 0                   |
| <b>seq1635</b> | Firmicutes    | Clostridia   | 0                  | 0                   | 0                  | 0                   |
| <b>seq1647</b> | Firmicutes    | Clostridia   | 0                  | 0                   | 0                  | 0                   |
| <b>seq1658</b> | Firmicutes    | Clostridia   | 0                  | 0                   | 0                  | 0                   |
| <b>seq1660</b> | Firmicutes    |              | 0                  | 0                   | 0                  | 0                   |
| <b>seq1665</b> | Firmicutes    |              | 0                  | 0                   | 0                  | 0                   |
| <b>seq1681</b> | Firmicutes    | Clostridia   | 0                  | 0                   | 0                  | 0                   |
| <b>seq1694</b> | Firmicutes    |              | 0                  | 0                   | 0                  | 0                   |
| <b>seq1698</b> | Firmicutes    | Clostridia   | 0                  | 0                   | 0                  | 0                   |
| <b>seq1700</b> | Firmicutes    |              | 0                  | 0                   | 0                  | 0                   |
| <b>seq1719</b> | Firmicutes    | Clostridia   | 0                  | 0                   | 0                  | 0                   |
| <b>seq1721</b> | Firmicutes    | Clostridia   | 0                  | 0                   | 0                  | 0                   |
| <b>seq1756</b> | Firmicutes    | Clostridia   | 0                  | 0                   | 0                  | 0                   |
| <b>seq1810</b> | Firmicutes    | Clostridia   | 0                  | 0                   | 0                  | 0                   |
| <b>seq1815</b> | Firmicutes    | Clostridia   | 0                  | 0                   | 0                  | 0                   |
| <b>seq1843</b> | Firmicutes    | Clostridia   | 0                  | 0                   | 0                  | 0                   |
| <b>seq1844</b> | Firmicutes    | Clostridia   | 0                  | 0                   | 0                  | 0                   |

Sequence Count Table

|                | <b>Phylum</b> | <b>Class</b> | <b>Subject4WK0</b> | <b>Subject4WK12</b> | <b>Subject5WK0</b> | <b>Subject5WK12</b> |
|----------------|---------------|--------------|--------------------|---------------------|--------------------|---------------------|
| <b>seq1215</b> | Firmicutes    | Clostridia   | 0                  | 0                   | 0                  | 0                   |
| <b>seq1221</b> | Firmicutes    | Clostridia   | 0                  | 0                   | 0                  | 0                   |
| <b>seq1269</b> | Firmicutes    | Clostridia   | 0                  | 5                   | 0                  | 0                   |
| <b>seq1288</b> | Firmicutes    | Clostridia   | 59                 | 0                   | 0                  | 0                   |
| <b>seq1298</b> | Firmicutes    | Clostridia   | 57                 | 0                   | 0                  | 0                   |
| <b>seq1345</b> | Firmicutes    |              | 0                  | 0                   | 28                 | 0                   |
| <b>seq1370</b> | Firmicutes    | Clostridia   | 0                  | 0                   | 0                  | 0                   |
| <b>seq1371</b> | Firmicutes    | Clostridia   | 23                 | 6                   | 0                  | 0                   |
| <b>seq1385</b> | Firmicutes    | Clostridia   | 0                  | 0                   | 0                  | 0                   |
| <b>seq1436</b> | Firmicutes    | Clostridia   | 0                  | 0                   | 0                  | 0                   |
| <b>seq1457</b> | Firmicutes    | Clostridia   | 0                  | 0                   | 0                  | 0                   |
| <b>seq1468</b> | Firmicutes    | Clostridia   | 0                  | 0                   | 0                  | 0                   |
| <b>seq1490</b> | Firmicutes    | Clostridia   | 0                  | 0                   | 0                  | 0                   |
| <b>seq1542</b> | Firmicutes    | Clostridia   | 0                  | 0                   | 0                  | 0                   |
| <b>seq1547</b> | Firmicutes    | Clostridia   | 0                  | 0                   | 0                  | 0                   |
| <b>seq1562</b> | Firmicutes    | Clostridia   | 10                 | 12                  | 0                  | 0                   |
| <b>seq1635</b> | Firmicutes    | Clostridia   | 0                  | 0                   | 0                  | 0                   |
| <b>seq1647</b> | Firmicutes    | Clostridia   | 0                  | 0                   | 0                  | 0                   |
| <b>seq1658</b> | Firmicutes    | Clostridia   | 15                 | 0                   | 0                  | 0                   |
| <b>seq1660</b> | Firmicutes    |              | 0                  | 0                   | 0                  | 0                   |
| <b>seq1665</b> | Firmicutes    |              | 0                  | 0                   | 0                  | 0                   |
| <b>seq1681</b> | Firmicutes    | Clostridia   | 0                  | 0                   | 0                  | 0                   |
| <b>seq1694</b> | Firmicutes    |              | 0                  | 0                   | 0                  | 0                   |
| <b>seq1698</b> | Firmicutes    | Clostridia   | 0                  | 0                   | 0                  | 0                   |
| <b>seq1700</b> | Firmicutes    |              | 0                  | 0                   | 0                  | 0                   |
| <b>seq1719</b> | Firmicutes    | Clostridia   | 0                  | 0                   | 0                  | 0                   |
| <b>seq1721</b> | Firmicutes    | Clostridia   | 0                  | 0                   | 0                  | 0                   |
| <b>seq1756</b> | Firmicutes    | Clostridia   | 0                  | 0                   | 0                  | 0                   |
| <b>seq1810</b> | Firmicutes    | Clostridia   | 0                  | 0                   | 0                  | 0                   |
| <b>seq1815</b> | Firmicutes    | Clostridia   | 0                  | 0                   | 0                  | 0                   |
| <b>seq1843</b> | Firmicutes    | Clostridia   | 0                  | 0                   | 0                  | 0                   |
| <b>seq1844</b> | Firmicutes    | Clostridia   | 0                  | 0                   | 0                  | 0                   |

Sequence Count Table

|                | <b>Phylum</b> | <b>Class</b> | <b>Subject6WK0</b> | <b>Subject6WK12</b> | <b>Subject18WK0</b> | <b>Subject18WK12</b> |
|----------------|---------------|--------------|--------------------|---------------------|---------------------|----------------------|
| <b>seq1215</b> | Firmicutes    | Clostridia   | 0                  | 0                   | 0                   | 0                    |
| <b>seq1221</b> | Firmicutes    | Clostridia   | 0                  | 0                   | 0                   | 0                    |
| <b>seq1269</b> | Firmicutes    | Clostridia   | 0                  | 0                   | 0                   | 0                    |
| <b>seq1288</b> | Firmicutes    | Clostridia   | 0                  | 0                   | 0                   | 0                    |
| <b>seq1298</b> | Firmicutes    | Clostridia   | 0                  | 0                   | 0                   | 0                    |
| <b>seq1345</b> | Firmicutes    |              | 0                  | 0                   | 0                   | 0                    |
| <b>seq1370</b> | Firmicutes    | Clostridia   | 0                  | 0                   | 0                   | 0                    |
| <b>seq1371</b> | Firmicutes    | Clostridia   | 0                  | 0                   | 0                   | 0                    |
| <b>seq1385</b> | Firmicutes    | Clostridia   | 25                 | 18                  | 0                   | 0                    |
| <b>seq1436</b> | Firmicutes    | Clostridia   | 0                  | 0                   | 0                   | 0                    |
| <b>seq1457</b> | Firmicutes    | Clostridia   | 3                  | 0                   | 0                   | 0                    |
| <b>seq1468</b> | Firmicutes    | Clostridia   | 0                  | 0                   | 0                   | 0                    |
| <b>seq1490</b> | Firmicutes    | Clostridia   | 0                  | 0                   | 0                   | 0                    |
| <b>seq1542</b> | Firmicutes    | Clostridia   | 0                  | 0                   | 0                   | 0                    |
| <b>seq1547</b> | Firmicutes    | Clostridia   | 0                  | 0                   | 0                   | 0                    |
| <b>seq1562</b> | Firmicutes    | Clostridia   | 0                  | 0                   | 0                   | 0                    |
| <b>seq1635</b> | Firmicutes    | Clostridia   | 0                  | 0                   | 0                   | 0                    |
| <b>seq1647</b> | Firmicutes    | Clostridia   | 0                  | 0                   | 0                   | 0                    |
| <b>seq1658</b> | Firmicutes    | Clostridia   | 0                  | 0                   | 0                   | 0                    |
| <b>seq1660</b> | Firmicutes    |              | 0                  | 6                   | 0                   | 0                    |
| <b>seq1665</b> | Firmicutes    |              | 0                  | 0                   | 0                   | 0                    |
| <b>seq1681</b> | Firmicutes    | Clostridia   | 0                  | 0                   | 0                   | 0                    |
| <b>seq1694</b> | Firmicutes    |              | 0                  | 4                   | 0                   | 0                    |
| <b>seq1698</b> | Firmicutes    | Clostridia   | 0                  | 0                   | 0                   | 0                    |
| <b>seq1700</b> | Firmicutes    |              | 0                  | 0                   | 0                   | 0                    |
| <b>seq1719</b> | Firmicutes    | Clostridia   | 0                  | 0                   | 0                   | 0                    |
| <b>seq1721</b> | Firmicutes    | Clostridia   | 0                  | 0                   | 0                   | 0                    |
| <b>seq1756</b> | Firmicutes    | Clostridia   | 0                  | 0                   | 0                   | 0                    |
| <b>seq1810</b> | Firmicutes    | Clostridia   | 0                  | 7                   | 0                   | 0                    |
| <b>seq1815</b> | Firmicutes    | Clostridia   | 0                  | 0                   | 0                   | 0                    |
| <b>seq1843</b> | Firmicutes    | Clostridia   | 0                  | 0                   | 0                   | 0                    |
| <b>seq1844</b> | Firmicutes    | Clostridia   | 0                  | 0                   | 0                   | 0                    |

Sequence Count Table

|                | <b>Phylum</b> | <b>Class</b> | <b>Subject19WK0</b> | <b>Subject19WK12</b> | <b>Subject20WK0</b> | <b>Subject20WK12</b> |
|----------------|---------------|--------------|---------------------|----------------------|---------------------|----------------------|
| <b>seq1215</b> | Firmicutes    | Clostridia   | 0                   | 0                    | 0                   | 0                    |
| <b>seq1221</b> | Firmicutes    | Clostridia   | 0                   | 0                    | 0                   | 0                    |
| <b>seq1269</b> | Firmicutes    | Clostridia   | 0                   | 0                    | 0                   | 0                    |
| <b>seq1288</b> | Firmicutes    | Clostridia   | 0                   | 0                    | 0                   | 0                    |
| <b>seq1298</b> | Firmicutes    | Clostridia   | 0                   | 0                    | 0                   | 0                    |
| <b>seq1345</b> | Firmicutes    |              | 0                   | 0                    | 0                   | 0                    |
| <b>seq1370</b> | Firmicutes    | Clostridia   | 0                   | 0                    | 0                   | 0                    |
| <b>seq1371</b> | Firmicutes    | Clostridia   | 0                   | 0                    | 0                   | 0                    |
| <b>seq1385</b> | Firmicutes    | Clostridia   | 0                   | 0                    | 0                   | 0                    |
| <b>seq1436</b> | Firmicutes    | Clostridia   | 0                   | 0                    | 0                   | 0                    |
| <b>seq1457</b> | Firmicutes    | Clostridia   | 0                   | 0                    | 0                   | 0                    |
| <b>seq1468</b> | Firmicutes    | Clostridia   | 0                   | 0                    | 0                   | 0                    |
| <b>seq1490</b> | Firmicutes    | Clostridia   | 0                   | 0                    | 0                   | 0                    |
| <b>seq1542</b> | Firmicutes    | Clostridia   | 0                   | 0                    | 0                   | 0                    |
| <b>seq1547</b> | Firmicutes    | Clostridia   | 0                   | 0                    | 0                   | 0                    |
| <b>seq1562</b> | Firmicutes    | Clostridia   | 0                   | 0                    | 0                   | 0                    |
| <b>seq1635</b> | Firmicutes    | Clostridia   | 0                   | 0                    | 0                   | 0                    |
| <b>seq1647</b> | Firmicutes    | Clostridia   | 0                   | 0                    | 0                   | 0                    |
| <b>seq1658</b> | Firmicutes    | Clostridia   | 0                   | 0                    | 0                   | 0                    |
| <b>seq1660</b> | Firmicutes    |              | 0                   | 0                    | 4                   | 0                    |
| <b>seq1665</b> | Firmicutes    |              | 0                   | 0                    | 0                   | 0                    |
| <b>seq1681</b> | Firmicutes    | Clostridia   | 0                   | 0                    | 0                   | 0                    |
| <b>seq1694</b> | Firmicutes    |              | 0                   | 0                    | 0                   | 0                    |
| <b>seq1698</b> | Firmicutes    | Clostridia   | 0                   | 0                    | 0                   | 0                    |
| <b>seq1700</b> | Firmicutes    |              | 0                   | 0                    | 0                   | 0                    |
| <b>seq1719</b> | Firmicutes    | Clostridia   | 0                   | 0                    | 0                   | 0                    |
| <b>seq1721</b> | Firmicutes    | Clostridia   | 0                   | 0                    | 0                   | 0                    |
| <b>seq1756</b> | Firmicutes    | Clostridia   | 0                   | 0                    | 0                   | 0                    |
| <b>seq1810</b> | Firmicutes    | Clostridia   | 0                   | 0                    | 0                   | 0                    |
| <b>seq1815</b> | Firmicutes    | Clostridia   | 0                   | 0                    | 0                   | 0                    |
| <b>seq1843</b> | Firmicutes    | Clostridia   | 0                   | 0                    | 0                   | 0                    |
| <b>seq1844</b> | Firmicutes    | Clostridia   | 0                   | 0                    | 0                   | 0                    |

Sequence Count Table

|                | <b>Phylum</b> | <b>Class</b> | <b>Subject7WK0</b> | <b>Subject7WK12</b> | <b>Subject21WK0</b> | <b>Subject21WK12</b> |
|----------------|---------------|--------------|--------------------|---------------------|---------------------|----------------------|
| <b>seq1215</b> | Firmicutes    | Clostridia   | 0                  | 0                   | 0                   | 0                    |
| <b>seq1221</b> | Firmicutes    | Clostridia   | 0                  | 0                   | 0                   | 0                    |
| <b>seq1269</b> | Firmicutes    | Clostridia   | 0                  | 0                   | 0                   | 0                    |
| <b>seq1288</b> | Firmicutes    | Clostridia   | 0                  | 0                   | 0                   | 0                    |
| <b>seq1298</b> | Firmicutes    | Clostridia   | 0                  | 0                   | 0                   | 0                    |
| <b>seq1345</b> | Firmicutes    |              | 0                  | 0                   | 0                   | 0                    |
| <b>seq1370</b> | Firmicutes    | Clostridia   | 3                  | 0                   | 0                   | 0                    |
| <b>seq1371</b> | Firmicutes    | Clostridia   | 0                  | 0                   | 0                   | 0                    |
| <b>seq1385</b> | Firmicutes    | Clostridia   | 0                  | 0                   | 0                   | 0                    |
| <b>seq1436</b> | Firmicutes    | Clostridia   | 0                  | 0                   | 0                   | 0                    |
| <b>seq1457</b> | Firmicutes    | Clostridia   | 0                  | 0                   | 0                   | 0                    |
| <b>seq1468</b> | Firmicutes    | Clostridia   | 14                 | 14                  | 0                   | 0                    |
| <b>seq1490</b> | Firmicutes    | Clostridia   | 0                  | 0                   | 0                   | 0                    |
| <b>seq1542</b> | Firmicutes    | Clostridia   | 0                  | 0                   | 0                   | 0                    |
| <b>seq1547</b> | Firmicutes    | Clostridia   | 15                 | 9                   | 0                   | 0                    |
| <b>seq1562</b> | Firmicutes    | Clostridia   | 0                  | 0                   | 0                   | 0                    |
| <b>seq1635</b> | Firmicutes    | Clostridia   | 0                  | 0                   | 0                   | 0                    |
| <b>seq1647</b> | Firmicutes    | Clostridia   | 0                  | 0                   | 0                   | 0                    |
| <b>seq1658</b> | Firmicutes    | Clostridia   | 0                  | 0                   | 0                   | 0                    |
| <b>seq1660</b> | Firmicutes    |              | 0                  | 0                   | 0                   | 0                    |
| <b>seq1665</b> | Firmicutes    |              | 0                  | 0                   | 0                   | 0                    |
| <b>seq1681</b> | Firmicutes    | Clostridia   | 0                  | 0                   | 0                   | 0                    |
| <b>seq1694</b> | Firmicutes    |              | 0                  | 0                   | 0                   | 0                    |
| <b>seq1698</b> | Firmicutes    | Clostridia   | 0                  | 0                   | 0                   | 0                    |
| <b>seq1700</b> | Firmicutes    |              | 0                  | 0                   | 0                   | 0                    |
| <b>seq1719</b> | Firmicutes    | Clostridia   | 0                  | 0                   | 0                   | 0                    |
| <b>seq1721</b> | Firmicutes    | Clostridia   | 0                  | 0                   | 0                   | 0                    |
| <b>seq1756</b> | Firmicutes    | Clostridia   | 0                  | 0                   | 0                   | 0                    |
| <b>seq1810</b> | Firmicutes    | Clostridia   | 0                  | 0                   | 0                   | 0                    |
| <b>seq1815</b> | Firmicutes    | Clostridia   | 0                  | 0                   | 0                   | 0                    |
| <b>seq1843</b> | Firmicutes    | Clostridia   | 0                  | 0                   | 0                   | 0                    |
| <b>seq1844</b> | Firmicutes    | Clostridia   | 0                  | 0                   | 0                   | 0                    |

Sequence Count Table

|                | <b>Phylum</b> | <b>Class</b> | <b>Subject8WK0</b> | <b>Subject8WK12</b> | <b>Subject9WK0</b> | <b>Subject9WK12</b> |
|----------------|---------------|--------------|--------------------|---------------------|--------------------|---------------------|
| <b>seq1215</b> | Firmicutes    | Clostridia   | 0                  | 0                   | 0                  | 0                   |
| <b>seq1221</b> | Firmicutes    | Clostridia   | 0                  | 0                   | 0                  | 0                   |
| <b>seq1269</b> | Firmicutes    | Clostridia   | 0                  | 0                   | 0                  | 0                   |
| <b>seq1288</b> | Firmicutes    | Clostridia   | 0                  | 0                   | 0                  | 0                   |
| <b>seq1298</b> | Firmicutes    | Clostridia   | 0                  | 0                   | 0                  | 0                   |
| <b>seq1345</b> | Firmicutes    |              | 0                  | 0                   | 0                  | 0                   |
| <b>seq1370</b> | Firmicutes    | Clostridia   | 0                  | 0                   | 0                  | 0                   |
| <b>seq1371</b> | Firmicutes    | Clostridia   | 0                  | 0                   | 0                  | 0                   |
| <b>seq1385</b> | Firmicutes    | Clostridia   | 0                  | 0                   | 0                  | 0                   |
| <b>seq1436</b> | Firmicutes    | Clostridia   | 0                  | 0                   | 0                  | 0                   |
| <b>seq1457</b> | Firmicutes    | Clostridia   | 0                  | 0                   | 15                 | 0                   |
| <b>seq1468</b> | Firmicutes    | Clostridia   | 0                  | 0                   | 0                  | 0                   |
| <b>seq1490</b> | Firmicutes    | Clostridia   | 0                  | 0                   | 0                  | 0                   |
| <b>seq1542</b> | Firmicutes    | Clostridia   | 0                  | 0                   | 0                  | 0                   |
| <b>seq1547</b> | Firmicutes    | Clostridia   | 0                  | 0                   | 0                  | 0                   |
| <b>seq1562</b> | Firmicutes    | Clostridia   | 0                  | 0                   | 0                  | 0                   |
| <b>seq1635</b> | Firmicutes    | Clostridia   | 7                  | 0                   | 0                  | 0                   |
| <b>seq1647</b> | Firmicutes    | Clostridia   | 0                  | 0                   | 0                  | 0                   |
| <b>seq1658</b> | Firmicutes    | Clostridia   | 0                  | 0                   | 0                  | 0                   |
| <b>seq1660</b> | Firmicutes    |              | 0                  | 0                   | 0                  | 0                   |
| <b>seq1665</b> | Firmicutes    |              | 0                  | 0                   | 0                  | 0                   |
| <b>seq1681</b> | Firmicutes    | Clostridia   | 0                  | 0                   | 0                  | 0                   |
| <b>seq1694</b> | Firmicutes    |              | 0                  | 0                   | 0                  | 0                   |
| <b>seq1698</b> | Firmicutes    | Clostridia   | 0                  | 0                   | 0                  | 0                   |
| <b>seq1700</b> | Firmicutes    |              | 0                  | 0                   | 0                  | 0                   |
| <b>seq1719</b> | Firmicutes    | Clostridia   | 0                  | 0                   | 0                  | 0                   |
| <b>seq1721</b> | Firmicutes    | Clostridia   | 0                  | 0                   | 0                  | 0                   |
| <b>seq1756</b> | Firmicutes    | Clostridia   | 0                  | 0                   | 0                  | 0                   |
| <b>seq1810</b> | Firmicutes    | Clostridia   | 0                  | 0                   | 0                  | 0                   |
| <b>seq1815</b> | Firmicutes    | Clostridia   | 0                  | 0                   | 0                  | 0                   |
| <b>seq1843</b> | Firmicutes    | Clostridia   | 0                  | 0                   | 0                  | 0                   |
| <b>seq1844</b> | Firmicutes    | Clostridia   | 0                  | 0                   | 0                  | 0                   |



Sequence Count Table

|                | <b>Phylum</b> | <b>Class</b> | <b>Subject10WK0</b> | <b>Subject10WK12</b> | <b>Subject22WK0</b> | <b>Subject22WK12</b> |
|----------------|---------------|--------------|---------------------|----------------------|---------------------|----------------------|
| <b>seq1215</b> | Firmicutes    | Clostridia   | 0                   | 0                    | 0                   | 0                    |
| <b>seq1221</b> | Firmicutes    | Clostridia   | 0                   | 0                    | 35                  | 39                   |
| <b>seq1269</b> | Firmicutes    | Clostridia   | 0                   | 0                    | 0                   | 0                    |
| <b>seq1288</b> | Firmicutes    | Clostridia   | 0                   | 0                    | 0                   | 0                    |
| <b>seq1298</b> | Firmicutes    | Clostridia   | 0                   | 0                    | 0                   | 0                    |
| <b>seq1345</b> | Firmicutes    |              | 0                   | 0                    | 0                   | 0                    |
| <b>seq1370</b> | Firmicutes    | Clostridia   | 0                   | 0                    | 0                   | 0                    |
| <b>seq1371</b> | Firmicutes    | Clostridia   | 0                   | 0                    | 0                   | 0                    |
| <b>seq1385</b> | Firmicutes    | Clostridia   | 0                   | 0                    | 0                   | 0                    |
| <b>seq1436</b> | Firmicutes    | Clostridia   | 0                   | 0                    | 8                   | 0                    |
| <b>seq1457</b> | Firmicutes    | Clostridia   | 0                   | 0                    | 6                   | 0                    |
| <b>seq1468</b> | Firmicutes    | Clostridia   | 0                   | 0                    | 0                   | 0                    |
| <b>seq1490</b> | Firmicutes    | Clostridia   | 0                   | 0                    | 0                   | 0                    |
| <b>seq1542</b> | Firmicutes    | Clostridia   | 0                   | 0                    | 0                   | 0                    |
| <b>seq1547</b> | Firmicutes    | Clostridia   | 0                   | 0                    | 0                   | 0                    |
| <b>seq1562</b> | Firmicutes    | Clostridia   | 0                   | 0                    | 0                   | 0                    |
| <b>seq1635</b> | Firmicutes    | Clostridia   | 0                   | 0                    | 0                   | 0                    |
| <b>seq1647</b> | Firmicutes    | Clostridia   | 0                   | 0                    | 10                  | 6                    |
| <b>seq1658</b> | Firmicutes    | Clostridia   | 0                   | 0                    | 0                   | 0                    |
| <b>seq1660</b> | Firmicutes    |              | 0                   | 0                    | 0                   | 5                    |
| <b>seq1665</b> | Firmicutes    |              | 0                   | 0                    | 6                   | 9                    |
| <b>seq1681</b> | Firmicutes    | Clostridia   | 0                   | 0                    | 0                   | 0                    |
| <b>seq1694</b> | Firmicutes    |              | 0                   | 0                    | 0                   | 0                    |
| <b>seq1698</b> | Firmicutes    | Clostridia   | 0                   | 0                    | 0                   | 13                   |
| <b>seq1700</b> | Firmicutes    |              | 0                   | 0                    | 0                   | 4                    |
| <b>seq1719</b> | Firmicutes    | Clostridia   | 0                   | 0                    | 0                   | 0                    |
| <b>seq1721</b> | Firmicutes    | Clostridia   | 0                   | 0                    | 0                   | 0                    |
| <b>seq1756</b> | Firmicutes    | Clostridia   | 0                   | 0                    | 0                   | 0                    |
| <b>seq1810</b> | Firmicutes    | Clostridia   | 0                   | 0                    | 0                   | 0                    |
| <b>seq1815</b> | Firmicutes    | Clostridia   | 0                   | 0                    | 3                   | 4                    |
| <b>seq1843</b> | Firmicutes    | Clostridia   | 0                   | 0                    | 0                   | 0                    |
| <b>seq1844</b> | Firmicutes    | Clostridia   | 0                   | 0                    | 0                   | 0                    |

Sequence Count Table

|                | <b>Phylum</b> | <b>Class</b> | <b>Subject23WK0</b> | <b>Subject23WK12</b> | <b>Subject24WK0</b> | <b>Subject24WK12</b> |
|----------------|---------------|--------------|---------------------|----------------------|---------------------|----------------------|
| <b>seq1215</b> | Firmicutes    | Clostridia   | 0                   | 0                    | 0                   | 0                    |
| <b>seq1221</b> | Firmicutes    | Clostridia   | 0                   | 0                    | 0                   | 0                    |
| <b>seq1269</b> | Firmicutes    | Clostridia   | 0                   | 3                    | 0                   | 12                   |
| <b>seq1288</b> | Firmicutes    | Clostridia   | 0                   | 0                    | 0                   | 0                    |
| <b>seq1298</b> | Firmicutes    | Clostridia   | 0                   | 0                    | 0                   | 0                    |
| <b>seq1345</b> | Firmicutes    |              | 0                   | 0                    | 21                  | 0                    |
| <b>seq1370</b> | Firmicutes    | Clostridia   | 0                   | 0                    | 0                   | 0                    |
| <b>seq1371</b> | Firmicutes    | Clostridia   | 0                   | 8                    | 0                   | 0                    |
| <b>seq1385</b> | Firmicutes    | Clostridia   | 0                   | 0                    | 0                   | 0                    |
| <b>seq1436</b> | Firmicutes    | Clostridia   | 0                   | 0                    | 0                   | 0                    |
| <b>seq1457</b> | Firmicutes    | Clostridia   | 0                   | 0                    | 0                   | 0                    |
| <b>seq1468</b> | Firmicutes    | Clostridia   | 0                   | 0                    | 0                   | 0                    |
| <b>seq1490</b> | Firmicutes    | Clostridia   | 0                   | 0                    | 0                   | 0                    |
| <b>seq1542</b> | Firmicutes    | Clostridia   | 0                   | 0                    | 0                   | 0                    |
| <b>seq1547</b> | Firmicutes    | Clostridia   | 0                   | 0                    | 0                   | 0                    |
| <b>seq1562</b> | Firmicutes    | Clostridia   | 0                   | 0                    | 0                   | 0                    |
| <b>seq1635</b> | Firmicutes    | Clostridia   | 0                   | 0                    | 0                   | 0                    |
| <b>seq1647</b> | Firmicutes    | Clostridia   | 0                   | 0                    | 0                   | 0                    |
| <b>seq1658</b> | Firmicutes    | Clostridia   | 0                   | 0                    | 0                   | 0                    |
| <b>seq1660</b> | Firmicutes    |              | 0                   | 0                    | 0                   | 0                    |
| <b>seq1665</b> | Firmicutes    |              | 0                   | 0                    | 0                   | 0                    |
| <b>seq1681</b> | Firmicutes    | Clostridia   | 0                   | 14                   | 0                   | 0                    |
| <b>seq1694</b> | Firmicutes    |              | 0                   | 0                    | 0                   | 0                    |
| <b>seq1698</b> | Firmicutes    | Clostridia   | 0                   | 0                    | 0                   | 0                    |
| <b>seq1700</b> | Firmicutes    |              | 0                   | 0                    | 0                   | 0                    |
| <b>seq1719</b> | Firmicutes    | Clostridia   | 0                   | 0                    | 0                   | 0                    |
| <b>seq1721</b> | Firmicutes    | Clostridia   | 0                   | 0                    | 0                   | 0                    |
| <b>seq1756</b> | Firmicutes    | Clostridia   | 0                   | 10                   | 0                   | 0                    |
| <b>seq1810</b> | Firmicutes    | Clostridia   | 0                   | 0                    | 0                   | 0                    |
| <b>seq1815</b> | Firmicutes    | Clostridia   | 0                   | 0                    | 0                   | 0                    |
| <b>seq1843</b> | Firmicutes    | Clostridia   | 0                   | 0                    | 0                   | 0                    |
| <b>seq1844</b> | Firmicutes    | Clostridia   | 0                   | 0                    | 0                   | 0                    |

Sequence Count Table

|                | <b>Phylum</b> | <b>Class</b> | <b>Subject11WK0</b> | <b>Subject11WK12</b> | <b>Subject12WK0</b> | <b>Subject12WK12</b> |
|----------------|---------------|--------------|---------------------|----------------------|---------------------|----------------------|
| <b>seq1215</b> | Firmicutes    | Clostridia   | 0                   | 0                    | 0                   | 0                    |
| <b>seq1221</b> | Firmicutes    | Clostridia   | 0                   | 0                    | 0                   | 0                    |
| <b>seq1269</b> | Firmicutes    | Clostridia   | 0                   | 0                    | 0                   | 0                    |
| <b>seq1288</b> | Firmicutes    | Clostridia   | 0                   | 0                    | 0                   | 0                    |
| <b>seq1298</b> | Firmicutes    | Clostridia   | 0                   | 0                    | 0                   | 0                    |
| <b>seq1345</b> | Firmicutes    |              | 0                   | 0                    | 0                   | 0                    |
| <b>seq1370</b> | Firmicutes    | Clostridia   | 0                   | 0                    | 0                   | 0                    |
| <b>seq1371</b> | Firmicutes    | Clostridia   | 0                   | 0                    | 0                   | 0                    |
| <b>seq1385</b> | Firmicutes    | Clostridia   | 0                   | 0                    | 0                   | 0                    |
| <b>seq1436</b> | Firmicutes    | Clostridia   | 0                   | 0                    | 0                   | 0                    |
| <b>seq1457</b> | Firmicutes    | Clostridia   | 0                   | 0                    | 0                   | 0                    |
| <b>seq1468</b> | Firmicutes    | Clostridia   | 0                   | 0                    | 0                   | 4                    |
| <b>seq1490</b> | Firmicutes    | Clostridia   | 0                   | 0                    | 0                   | 0                    |
| <b>seq1542</b> | Firmicutes    | Clostridia   | 0                   | 0                    | 0                   | 0                    |
| <b>seq1547</b> | Firmicutes    | Clostridia   | 0                   | 0                    | 0                   | 0                    |
| <b>seq1562</b> | Firmicutes    | Clostridia   | 0                   | 0                    | 0                   | 0                    |
| <b>seq1635</b> | Firmicutes    | Clostridia   | 0                   | 0                    | 0                   | 0                    |
| <b>seq1647</b> | Firmicutes    | Clostridia   | 0                   | 0                    | 0                   | 0                    |
| <b>seq1658</b> | Firmicutes    | Clostridia   | 0                   | 0                    | 0                   | 0                    |
| <b>seq1660</b> | Firmicutes    |              | 0                   | 0                    | 0                   | 0                    |
| <b>seq1665</b> | Firmicutes    |              | 0                   | 0                    | 0                   | 0                    |
| <b>seq1681</b> | Firmicutes    | Clostridia   | 0                   | 0                    | 0                   | 0                    |
| <b>seq1694</b> | Firmicutes    |              | 0                   | 0                    | 0                   | 0                    |
| <b>seq1698</b> | Firmicutes    | Clostridia   | 0                   | 0                    | 0                   | 0                    |
| <b>seq1700</b> | Firmicutes    |              | 0                   | 0                    | 0                   | 0                    |
| <b>seq1719</b> | Firmicutes    | Clostridia   | 0                   | 0                    | 0                   | 0                    |
| <b>seq1721</b> | Firmicutes    | Clostridia   | 0                   | 0                    | 0                   | 0                    |
| <b>seq1756</b> | Firmicutes    | Clostridia   | 0                   | 0                    | 0                   | 0                    |
| <b>seq1810</b> | Firmicutes    | Clostridia   | 0                   | 0                    | 0                   | 0                    |
| <b>seq1815</b> | Firmicutes    | Clostridia   | 0                   | 0                    | 0                   | 0                    |
| <b>seq1843</b> | Firmicutes    | Clostridia   | 0                   | 0                    | 0                   | 0                    |
| <b>seq1844</b> | Firmicutes    | Clostridia   | 0                   | 0                    | 0                   | 0                    |

Sequence Count Table

|                | <b>Phylum</b> | <b>Class</b> | <b>Subject25WK0</b> | <b>Subject25WK12</b> | <b>Subject38WK0</b> | <b>Subject38WK12</b> |
|----------------|---------------|--------------|---------------------|----------------------|---------------------|----------------------|
| <b>seq1215</b> | Firmicutes    | Clostridia   | 0                   | 0                    | 0                   | 0                    |
| <b>seq1221</b> | Firmicutes    | Clostridia   | 0                   | 0                    | 0                   | 0                    |
| <b>seq1269</b> | Firmicutes    | Clostridia   | 11                  | 0                    | 0                   | 0                    |
| <b>seq1288</b> | Firmicutes    | Clostridia   | 0                   | 0                    | 0                   | 0                    |
| <b>seq1298</b> | Firmicutes    | Clostridia   | 0                   | 0                    | 0                   | 0                    |
| <b>seq1345</b> | Firmicutes    |              | 0                   | 0                    | 0                   | 0                    |
| <b>seq1370</b> | Firmicutes    | Clostridia   | 0                   | 0                    | 0                   | 0                    |
| <b>seq1371</b> | Firmicutes    | Clostridia   | 0                   | 0                    | 0                   | 0                    |
| <b>seq1385</b> | Firmicutes    | Clostridia   | 0                   | 0                    | 0                   | 0                    |
| <b>seq1436</b> | Firmicutes    | Clostridia   | 0                   | 0                    | 0                   | 0                    |
| <b>seq1457</b> | Firmicutes    | Clostridia   | 0                   | 0                    | 0                   | 0                    |
| <b>seq1468</b> | Firmicutes    | Clostridia   | 0                   | 0                    | 0                   | 0                    |
| <b>seq1490</b> | Firmicutes    | Clostridia   | 0                   | 0                    | 0                   | 0                    |
| <b>seq1542</b> | Firmicutes    | Clostridia   | 0                   | 0                    | 0                   | 0                    |
| <b>seq1547</b> | Firmicutes    | Clostridia   | 0                   | 0                    | 0                   | 0                    |
| <b>seq1562</b> | Firmicutes    | Clostridia   | 0                   | 0                    | 0                   | 0                    |
| <b>seq1635</b> | Firmicutes    | Clostridia   | 5                   | 0                    | 0                   | 0                    |
| <b>seq1647</b> | Firmicutes    | Clostridia   | 0                   | 0                    | 0                   | 0                    |
| <b>seq1658</b> | Firmicutes    | Clostridia   | 0                   | 0                    | 0                   | 0                    |
| <b>seq1660</b> | Firmicutes    |              | 0                   | 0                    | 0                   | 0                    |
| <b>seq1665</b> | Firmicutes    |              | 0                   | 0                    | 0                   | 0                    |
| <b>seq1681</b> | Firmicutes    | Clostridia   | 0                   | 0                    | 0                   | 0                    |
| <b>seq1694</b> | Firmicutes    |              | 0                   | 0                    | 0                   | 0                    |
| <b>seq1698</b> | Firmicutes    | Clostridia   | 0                   | 0                    | 0                   | 0                    |
| <b>seq1700</b> | Firmicutes    |              | 5                   | 0                    | 0                   | 0                    |
| <b>seq1719</b> | Firmicutes    | Clostridia   | 0                   | 0                    | 0                   | 0                    |
| <b>seq1721</b> | Firmicutes    | Clostridia   | 0                   | 0                    | 0                   | 0                    |
| <b>seq1756</b> | Firmicutes    | Clostridia   | 0                   | 0                    | 0                   | 0                    |
| <b>seq1810</b> | Firmicutes    | Clostridia   | 0                   | 0                    | 0                   | 0                    |
| <b>seq1815</b> | Firmicutes    | Clostridia   | 0                   | 0                    | 0                   | 0                    |
| <b>seq1843</b> | Firmicutes    | Clostridia   | 0                   | 0                    | 0                   | 0                    |
| <b>seq1844</b> | Firmicutes    | Clostridia   | 0                   | 0                    | 0                   | 0                    |

Sequence Count Table

|                | <b>Phylum</b> | <b>Class</b> | <b>Subject31WK0</b> | <b>Subject31WK12</b> | <b>Subject32WK0</b> | <b>Subject32WK12</b> |
|----------------|---------------|--------------|---------------------|----------------------|---------------------|----------------------|
| <b>seq1215</b> | Firmicutes    | Clostridia   | 0                   | 0                    | 0                   | 0                    |
| <b>seq1221</b> | Firmicutes    | Clostridia   | 0                   | 0                    | 0                   | 0                    |
| <b>seq1269</b> | Firmicutes    | Clostridia   | 0                   | 0                    | 0                   | 0                    |
| <b>seq1288</b> | Firmicutes    | Clostridia   | 0                   | 0                    | 0                   | 0                    |
| <b>seq1298</b> | Firmicutes    | Clostridia   | 0                   | 0                    | 0                   | 0                    |
| <b>seq1345</b> | Firmicutes    |              | 0                   | 0                    | 0                   | 0                    |
| <b>seq1370</b> | Firmicutes    | Clostridia   | 0                   | 0                    | 0                   | 0                    |
| <b>seq1371</b> | Firmicutes    | Clostridia   | 0                   | 0                    | 0                   | 0                    |
| <b>seq1385</b> | Firmicutes    | Clostridia   | 0                   | 0                    | 0                   | 0                    |
| <b>seq1436</b> | Firmicutes    | Clostridia   | 0                   | 0                    | 0                   | 0                    |
| <b>seq1457</b> | Firmicutes    | Clostridia   | 0                   | 0                    | 0                   | 0                    |
| <b>seq1468</b> | Firmicutes    | Clostridia   | 0                   | 0                    | 0                   | 0                    |
| <b>seq1490</b> | Firmicutes    | Clostridia   | 0                   | 0                    | 0                   | 0                    |
| <b>seq1542</b> | Firmicutes    | Clostridia   | 0                   | 0                    | 0                   | 0                    |
| <b>seq1547</b> | Firmicutes    | Clostridia   | 0                   | 0                    | 0                   | 0                    |
| <b>seq1562</b> | Firmicutes    | Clostridia   | 0                   | 0                    | 0                   | 0                    |
| <b>seq1635</b> | Firmicutes    | Clostridia   | 0                   | 0                    | 0                   | 0                    |
| <b>seq1647</b> | Firmicutes    | Clostridia   | 0                   | 0                    | 0                   | 0                    |
| <b>seq1658</b> | Firmicutes    | Clostridia   | 0                   | 0                    | 0                   | 0                    |
| <b>seq1660</b> | Firmicutes    |              | 0                   | 0                    | 0                   | 0                    |
| <b>seq1665</b> | Firmicutes    |              | 0                   | 0                    | 0                   | 0                    |
| <b>seq1681</b> | Firmicutes    | Clostridia   | 0                   | 0                    | 0                   | 0                    |
| <b>seq1694</b> | Firmicutes    |              | 0                   | 0                    | 0                   | 0                    |
| <b>seq1698</b> | Firmicutes    | Clostridia   | 0                   | 0                    | 0                   | 0                    |
| <b>seq1700</b> | Firmicutes    |              | 0                   | 0                    | 0                   | 0                    |
| <b>seq1719</b> | Firmicutes    | Clostridia   | 0                   | 0                    | 0                   | 0                    |
| <b>seq1721</b> | Firmicutes    | Clostridia   | 0                   | 0                    | 0                   | 0                    |
| <b>seq1756</b> | Firmicutes    | Clostridia   | 0                   | 0                    | 0                   | 0                    |
| <b>seq1810</b> | Firmicutes    | Clostridia   | 0                   | 0                    | 0                   | 0                    |
| <b>seq1815</b> | Firmicutes    | Clostridia   | 0                   | 0                    | 0                   | 0                    |
| <b>seq1843</b> | Firmicutes    | Clostridia   | 0                   | 0                    | 0                   | 0                    |
| <b>seq1844</b> | Firmicutes    | Clostridia   | 0                   | 0                    | 0                   | 0                    |

Sequence Count Table

|                | <b>Phylum</b> | <b>Class</b> | <b>Subject13WK0</b> | <b>Subject13WK12</b> | <b>Subject39WK0</b> | <b>Subject39WK12</b> |
|----------------|---------------|--------------|---------------------|----------------------|---------------------|----------------------|
| <b>seq1215</b> | Firmicutes    | Clostridia   | 0                   | 75                   | 0                   | 0                    |
| <b>seq1221</b> | Firmicutes    | Clostridia   | 0                   | 0                    | 0                   | 0                    |
| <b>seq1269</b> | Firmicutes    | Clostridia   | 0                   | 0                    | 0                   | 0                    |
| <b>seq1288</b> | Firmicutes    | Clostridia   | 0                   | 0                    | 0                   | 0                    |
| <b>seq1298</b> | Firmicutes    | Clostridia   | 0                   | 0                    | 0                   | 0                    |
| <b>seq1345</b> | Firmicutes    |              | 0                   | 0                    | 0                   | 0                    |
| <b>seq1370</b> | Firmicutes    | Clostridia   | 10                  | 0                    | 0                   | 0                    |
| <b>seq1371</b> | Firmicutes    | Clostridia   | 0                   | 8                    | 0                   | 0                    |
| <b>seq1385</b> | Firmicutes    | Clostridia   | 0                   | 0                    | 0                   | 0                    |
| <b>seq1436</b> | Firmicutes    | Clostridia   | 0                   | 0                    | 0                   | 0                    |
| <b>seq1457</b> | Firmicutes    | Clostridia   | 0                   | 0                    | 0                   | 0                    |
| <b>seq1468</b> | Firmicutes    | Clostridia   | 0                   | 0                    | 0                   | 0                    |
| <b>seq1490</b> | Firmicutes    | Clostridia   | 0                   | 0                    | 0                   | 0                    |
| <b>seq1542</b> | Firmicutes    | Clostridia   | 0                   | 0                    | 0                   | 0                    |
| <b>seq1547</b> | Firmicutes    | Clostridia   | 0                   | 0                    | 0                   | 0                    |
| <b>seq1562</b> | Firmicutes    | Clostridia   | 0                   | 0                    | 0                   | 0                    |
| <b>seq1635</b> | Firmicutes    | Clostridia   | 0                   | 0                    | 0                   | 0                    |
| <b>seq1647</b> | Firmicutes    | Clostridia   | 0                   | 0                    | 0                   | 0                    |
| <b>seq1658</b> | Firmicutes    | Clostridia   | 0                   | 0                    | 0                   | 0                    |
| <b>seq1660</b> | Firmicutes    |              | 0                   | 0                    | 0                   | 0                    |
| <b>seq1665</b> | Firmicutes    |              | 0                   | 0                    | 0                   | 0                    |
| <b>seq1681</b> | Firmicutes    | Clostridia   | 0                   | 0                    | 0                   | 0                    |
| <b>seq1694</b> | Firmicutes    |              | 5                   | 4                    | 0                   | 0                    |
| <b>seq1698</b> | Firmicutes    | Clostridia   | 0                   | 0                    | 0                   | 0                    |
| <b>seq1700</b> | Firmicutes    |              | 4                   | 0                    | 0                   | 0                    |
| <b>seq1719</b> | Firmicutes    | Clostridia   | 12                  | 0                    | 0                   | 0                    |
| <b>seq1721</b> | Firmicutes    | Clostridia   | 0                   | 5                    | 0                   | 0                    |
| <b>seq1756</b> | Firmicutes    | Clostridia   | 0                   | 0                    | 0                   | 0                    |
| <b>seq1810</b> | Firmicutes    | Clostridia   | 0                   | 0                    | 0                   | 0                    |
| <b>seq1815</b> | Firmicutes    | Clostridia   | 0                   | 0                    | 0                   | 0                    |
| <b>seq1843</b> | Firmicutes    | Clostridia   | 0                   | 0                    | 0                   | 0                    |
| <b>seq1844</b> | Firmicutes    | Clostridia   | 0                   | 0                    | 0                   | 0                    |

Sequence Count Table

|                | <b>Phylum</b> | <b>Class</b> | <b>Subject26WK0</b> | <b>Subject26WK12</b> | <b>Subject14WK0</b> | <b>Subject14WK12</b> |
|----------------|---------------|--------------|---------------------|----------------------|---------------------|----------------------|
| <b>seq1215</b> | Firmicutes    | Clostridia   | 0                   | 0                    | 0                   | 0                    |
| <b>seq1221</b> | Firmicutes    | Clostridia   | 0                   | 0                    | 0                   | 0                    |
| <b>seq1269</b> | Firmicutes    | Clostridia   | 11                  | 11                   | 6                   | 0                    |
| <b>seq1288</b> | Firmicutes    | Clostridia   | 0                   | 0                    | 0                   | 0                    |
| <b>seq1298</b> | Firmicutes    | Clostridia   | 0                   | 0                    | 0                   | 0                    |
| <b>seq1345</b> | Firmicutes    |              | 0                   | 0                    | 0                   | 0                    |
| <b>seq1370</b> | Firmicutes    | Clostridia   | 0                   | 0                    | 0                   | 0                    |
| <b>seq1371</b> | Firmicutes    | Clostridia   | 0                   | 0                    | 0                   | 0                    |
| <b>seq1385</b> | Firmicutes    | Clostridia   | 0                   | 0                    | 0                   | 0                    |
| <b>seq1436</b> | Firmicutes    | Clostridia   | 0                   | 0                    | 0                   | 0                    |
| <b>seq1457</b> | Firmicutes    | Clostridia   | 0                   | 0                    | 0                   | 0                    |
| <b>seq1468</b> | Firmicutes    | Clostridia   | 0                   | 0                    | 0                   | 0                    |
| <b>seq1490</b> | Firmicutes    | Clostridia   | 0                   | 0                    | 0                   | 0                    |
| <b>seq1542</b> | Firmicutes    | Clostridia   | 0                   | 0                    | 0                   | 0                    |
| <b>seq1547</b> | Firmicutes    | Clostridia   | 0                   | 0                    | 0                   | 0                    |
| <b>seq1562</b> | Firmicutes    | Clostridia   | 0                   | 0                    | 0                   | 0                    |
| <b>seq1635</b> | Firmicutes    | Clostridia   | 0                   | 5                    | 0                   | 0                    |
| <b>seq1647</b> | Firmicutes    | Clostridia   | 0                   | 0                    | 0                   | 0                    |
| <b>seq1658</b> | Firmicutes    | Clostridia   | 0                   | 0                    | 0                   | 0                    |
| <b>seq1660</b> | Firmicutes    |              | 0                   | 0                    | 0                   | 0                    |
| <b>seq1665</b> | Firmicutes    |              | 0                   | 0                    | 0                   | 0                    |
| <b>seq1681</b> | Firmicutes    | Clostridia   | 0                   | 0                    | 0                   | 0                    |
| <b>seq1694</b> | Firmicutes    |              | 0                   | 0                    | 0                   | 0                    |
| <b>seq1698</b> | Firmicutes    | Clostridia   | 0                   | 0                    | 0                   | 0                    |
| <b>seq1700</b> | Firmicutes    |              | 0                   | 0                    | 0                   | 0                    |
| <b>seq1719</b> | Firmicutes    | Clostridia   | 0                   | 0                    | 0                   | 0                    |
| <b>seq1721</b> | Firmicutes    | Clostridia   | 0                   | 0                    | 0                   | 0                    |
| <b>seq1756</b> | Firmicutes    | Clostridia   | 0                   | 0                    | 0                   | 0                    |
| <b>seq1810</b> | Firmicutes    | Clostridia   | 0                   | 0                    | 0                   | 0                    |
| <b>seq1815</b> | Firmicutes    | Clostridia   | 0                   | 0                    | 0                   | 0                    |
| <b>seq1843</b> | Firmicutes    | Clostridia   | 0                   | 0                    | 0                   | 0                    |
| <b>seq1844</b> | Firmicutes    | Clostridia   | 0                   | 0                    | 0                   | 0                    |

Sequence Count Table

|                | <b>Phylum</b> | <b>Class</b> | <b>Subject27WK0</b> | <b>Subject27WK12</b> | <b>Subject15WK0</b> | <b>Subject15WK12</b> |
|----------------|---------------|--------------|---------------------|----------------------|---------------------|----------------------|
| <b>seq1215</b> | Firmicutes    | Clostridia   | 0                   | 0                    | 0                   | 0                    |
| <b>seq1221</b> | Firmicutes    | Clostridia   | 0                   | 0                    | 0                   | 0                    |
| <b>seq1269</b> | Firmicutes    | Clostridia   | 0                   | 0                    | 0                   | 0                    |
| <b>seq1288</b> | Firmicutes    | Clostridia   | 0                   | 0                    | 0                   | 0                    |
| <b>seq1298</b> | Firmicutes    | Clostridia   | 0                   | 0                    | 0                   | 0                    |
| <b>seq1345</b> | Firmicutes    |              | 0                   | 0                    | 0                   | 0                    |
| <b>seq1370</b> | Firmicutes    | Clostridia   | 0                   | 0                    | 0                   | 0                    |
| <b>seq1371</b> | Firmicutes    | Clostridia   | 0                   | 0                    | 0                   | 0                    |
| <b>seq1385</b> | Firmicutes    | Clostridia   | 0                   | 0                    | 0                   | 0                    |
| <b>seq1436</b> | Firmicutes    | Clostridia   | 0                   | 0                    | 0                   | 0                    |
| <b>seq1457</b> | Firmicutes    | Clostridia   | 0                   | 0                    | 0                   | 0                    |
| <b>seq1468</b> | Firmicutes    | Clostridia   | 0                   | 0                    | 0                   | 0                    |
| <b>seq1490</b> | Firmicutes    | Clostridia   | 0                   | 0                    | 0                   | 0                    |
| <b>seq1542</b> | Firmicutes    | Clostridia   | 0                   | 0                    | 0                   | 0                    |
| <b>seq1547</b> | Firmicutes    | Clostridia   | 0                   | 0                    | 0                   | 0                    |
| <b>seq1562</b> | Firmicutes    | Clostridia   | 0                   | 0                    | 0                   | 0                    |
| <b>seq1635</b> | Firmicutes    | Clostridia   | 0                   | 0                    | 0                   | 0                    |
| <b>seq1647</b> | Firmicutes    | Clostridia   | 0                   | 0                    | 0                   | 0                    |
| <b>seq1658</b> | Firmicutes    | Clostridia   | 0                   | 0                    | 0                   | 0                    |
| <b>seq1660</b> | Firmicutes    |              | 0                   | 0                    | 0                   | 0                    |
| <b>seq1665</b> | Firmicutes    |              | 0                   | 0                    | 0                   | 0                    |
| <b>seq1681</b> | Firmicutes    | Clostridia   | 0                   | 0                    | 0                   | 0                    |
| <b>seq1694</b> | Firmicutes    |              | 0                   | 0                    | 0                   | 0                    |
| <b>seq1698</b> | Firmicutes    | Clostridia   | 0                   | 0                    | 0                   | 0                    |
| <b>seq1700</b> | Firmicutes    |              | 0                   | 0                    | 0                   | 0                    |
| <b>seq1719</b> | Firmicutes    | Clostridia   | 0                   | 0                    | 0                   | 0                    |
| <b>seq1721</b> | Firmicutes    | Clostridia   | 0                   | 0                    | 0                   | 0                    |
| <b>seq1756</b> | Firmicutes    | Clostridia   | 0                   | 0                    | 0                   | 0                    |
| <b>seq1810</b> | Firmicutes    | Clostridia   | 0                   | 0                    | 0                   | 0                    |
| <b>seq1815</b> | Firmicutes    | Clostridia   | 0                   | 0                    | 0                   | 0                    |
| <b>seq1843</b> | Firmicutes    | Clostridia   | 0                   | 6                    | 0                   | 0                    |
| <b>seq1844</b> | Firmicutes    | Clostridia   | 0                   | 0                    | 0                   | 0                    |



Sequence Count Table

|                | <b>Phylum</b> | <b>Class</b> | <b>Δ</b> |  |  |  |
|----------------|---------------|--------------|----------|--|--|--|
| <b>seq1215</b> | Firmicutes    | Clostridia   |          |  |  |  |
| <b>seq1221</b> | Firmicutes    | Clostridia   |          |  |  |  |
| <b>seq1269</b> | Firmicutes    | Clostridia   |          |  |  |  |
| <b>seq1288</b> | Firmicutes    | Clostridia   |          |  |  |  |
| <b>seq1298</b> | Firmicutes    | Clostridia   |          |  |  |  |
| <b>seq1345</b> | Firmicutes    |              |          |  |  |  |
| <b>seq1370</b> | Firmicutes    | Clostridia   |          |  |  |  |
| <b>seq1371</b> | Firmicutes    | Clostridia   |          |  |  |  |
| <b>seq1385</b> | Firmicutes    | Clostridia   |          |  |  |  |
| <b>seq1436</b> | Firmicutes    | Clostridia   |          |  |  |  |
| <b>seq1457</b> | Firmicutes    | Clostridia   |          |  |  |  |
| <b>seq1468</b> | Firmicutes    | Clostridia   |          |  |  |  |
| <b>seq1490</b> | Firmicutes    | Clostridia   |          |  |  |  |
| <b>seq1542</b> | Firmicutes    | Clostridia   |          |  |  |  |
| <b>seq1547</b> | Firmicutes    | Clostridia   |          |  |  |  |
| <b>seq1562</b> | Firmicutes    | Clostridia   |          |  |  |  |
| <b>seq1635</b> | Firmicutes    | Clostridia   |          |  |  |  |
| <b>seq1647</b> | Firmicutes    | Clostridia   |          |  |  |  |
| <b>seq1658</b> | Firmicutes    | Clostridia   |          |  |  |  |
| <b>seq1660</b> | Firmicutes    |              |          |  |  |  |
| <b>seq1665</b> | Firmicutes    |              |          |  |  |  |
| <b>seq1681</b> | Firmicutes    | Clostridia   |          |  |  |  |
| <b>seq1694</b> | Firmicutes    |              |          |  |  |  |
| <b>seq1698</b> | Firmicutes    | Clostridia   |          |  |  |  |
| <b>seq1700</b> | Firmicutes    |              |          |  |  |  |
| <b>seq1719</b> | Firmicutes    | Clostridia   |          |  |  |  |
| <b>seq1721</b> | Firmicutes    | Clostridia   |          |  |  |  |
| <b>seq1756</b> | Firmicutes    | Clostridia   |          |  |  |  |
| <b>seq1810</b> | Firmicutes    | Clostridia   |          |  |  |  |
| <b>seq1815</b> | Firmicutes    | Clostridia   |          |  |  |  |
| <b>seq1843</b> | Firmicutes    | Clostridia   |          |  |  |  |
| <b>seq1844</b> | Firmicutes    | Clostridia   |          |  |  |  |

Sequence Count Table

|                | <b>Phylum</b>          | <b>Class</b>    | <b>Order</b>      | <b>Family</b>      |
|----------------|------------------------|-----------------|-------------------|--------------------|
| <b>seq1849</b> | Firmicutes             | Clostridia      | Clostridiales     |                    |
| <b>seq1862</b> | Firmicutes             | Clostridia      | Clostridiales     |                    |
| <b>seq1863</b> | Firmicutes             | Clostridia      | Clostridiales     |                    |
| <b>seq1864</b> | Firmicutes             | Clostridia      | Clostridiales     |                    |
| <b>seq1865</b> | Firmicutes             | Clostridia      | Clostridiales     |                    |
| <b>seq1881</b> | Firmicutes             | Clostridia      | Clostridiales     |                    |
| <b>seq1888</b> | Firmicutes             |                 |                   |                    |
| <b>seq1889</b> | Firmicutes             | Clostridia      | Clostridiales     |                    |
| <b>seq1893</b> | Firmicutes             | Clostridia      | Clostridiales     |                    |
| <b>seq1898</b> | Firmicutes             |                 |                   |                    |
| <b>seq1902</b> | Firmicutes             | Clostridia      | Clostridiales     |                    |
|                | <b>Firmicutes</b>      | <b>TOTAL</b>    |                   |                    |
|                |                        |                 |                   |                    |
| <b>seq169</b>  | Fusobacteria           | Fusobacteriia   | Fusobacteriales   | Fusobacteriaceae   |
| <b>seq1895</b> | Fusobacteria           | Fusobacteriia   | Fusobacteriales   | Fusobacteriaceae   |
| <b>seq1243</b> | Fusobacteria           | Fusobacteriia   | Fusobacteriales   | Leptotrichiaceae   |
| <b>seq1442</b> | Fusobacteria           | Fusobacteriia   | Fusobacteriales   | Leptotrichiaceae   |
|                | <b>Fusobacteria</b>    | <b>TOTAL</b>    |                   |                    |
|                |                        |                 |                   |                    |
| <b>seq490</b>  | Lentisphaerae          | Lentisphaeria   | Victivallales     | vadinBE97          |
| <b>seq617</b>  | Lentisphaerae          | Lentisphaeria   | Victivallales     | Victivallaceae     |
| <b>seq700</b>  | Lentisphaerae          | Lentisphaeria   | Victivallales     | Victivallaceae     |
| <b>seq966</b>  | Lentisphaerae          | Lentisphaeria   | Victivallales     | Victivallaceae     |
| <b>seq1387</b> | Lentisphaerae          | Lentisphaeria   | Victivallales     | Victivallaceae     |
| <b>seq845</b>  | Lentisphaerae          | Lentisphaeria   | Victivallales     |                    |
|                | <b>Lentisphaerae</b>   | <b>TOTAL</b>    |                   |                    |
|                |                        |                 |                   |                    |
| <b>seq1349</b> | Patescibacteria        | Saccharimonadia | Saccharimonadales | Saccharimonadaceae |
| <b>seq1744</b> | Patescibacteria        | Saccharimonadia | Saccharimonadales | Saccharimonadaceae |
| <b>seq1851</b> | Patescibacteria        | Saccharimonadia | Saccharimonadales |                    |
| <b>seq1884</b> | Patescibacteria        | Saccharimonadia | Saccharimonadales |                    |
|                | <b>Patescibacteria</b> | <b>TOTAL</b>    |                   |                    |

Sequence Count Table

|         | Phylum                 | Class           | Genus         | Species      |
|---------|------------------------|-----------------|---------------|--------------|
| seq1849 | Firmicutes             | Clostridia      |               |              |
| seq1862 | Firmicutes             | Clostridia      |               |              |
| seq1863 | Firmicutes             | Clostridia      |               |              |
| seq1864 | Firmicutes             | Clostridia      |               |              |
| seq1865 | Firmicutes             | Clostridia      |               |              |
| seq1881 | Firmicutes             | Clostridia      |               |              |
| seq1888 | Firmicutes             |                 |               |              |
| seq1889 | Firmicutes             | Clostridia      |               |              |
| seq1893 | Firmicutes             | Clostridia      |               |              |
| seq1898 | Firmicutes             |                 |               |              |
| seq1902 | Firmicutes             | Clostridia      |               |              |
|         | <b>Firmicutes</b>      | <b>TOTAL</b>    |               |              |
|         |                        |                 |               |              |
| seq169  | Fusobacteria           | Fusobacteriia   | Fusobacterium |              |
| seq1895 | Fusobacteria           | Fusobacteriia   | Fusobacterium | nucleatum    |
| seq1243 | Fusobacteria           | Fusobacteriia   | Sneathia      |              |
| seq1442 | Fusobacteria           | Fusobacteriia   | Sneathia      | sanguinegens |
|         | <b>Fusobacteria</b>    | <b>TOTAL</b>    |               |              |
|         |                        |                 |               |              |
| seq490  | Lentisphaerae          | Lentisphaeria   |               |              |
| seq617  | Lentisphaerae          | Lentisphaeria   | Victivallis   |              |
| seq700  | Lentisphaerae          | Lentisphaeria   | Victivallis   | vadensis     |
| seq966  | Lentisphaerae          | Lentisphaeria   |               |              |
| seq1387 | Lentisphaerae          | Lentisphaeria   |               |              |
| seq845  | Lentisphaerae          | Lentisphaeria   |               |              |
|         | <b>Lentisphaerae</b>   | <b>TOTAL</b>    |               |              |
|         |                        |                 |               |              |
| seq1349 | Patescibacteria        | Saccharimonadia |               |              |
| seq1744 | Patescibacteria        | Saccharimonadia |               |              |
| seq1851 | Patescibacteria        | Saccharimonadia |               |              |
| seq1884 | Patescibacteria        | Saccharimonadia |               |              |
|         | <b>Patescibacteria</b> | <b>TOTAL</b>    |               |              |

Sequence Count Table

|         | Phylum          | Class           | Subject34WK0 | Subject34WK12 | Subject16WK0 | Subject16WK12 |
|---------|-----------------|-----------------|--------------|---------------|--------------|---------------|
| seq1849 | Firmicutes      | Clostridia      | 0            | 0             | 0            | 0             |
| seq1862 | Firmicutes      | Clostridia      | 0            | 0             | 0            | 0             |
| seq1863 | Firmicutes      | Clostridia      | 0            | 0             | 0            | 0             |
| seq1864 | Firmicutes      | Clostridia      | 0            | 0             | 0            | 0             |
| seq1865 | Firmicutes      | Clostridia      | 0            | 0             | 0            | 0             |
| seq1881 | Firmicutes      | Clostridia      | 0            | 0             | 0            | 0             |
| seq1888 | Firmicutes      |                 | 0            | 0             | 0            | 0             |
| seq1889 | Firmicutes      | Clostridia      | 0            | 0             | 0            | 0             |
| seq1893 | Firmicutes      | Clostridia      | 0            | 0             | 0            | 0             |
| seq1898 | Firmicutes      |                 | 0            | 0             | 0            | 0             |
| seq1902 | Firmicutes      | Clostridia      | 0            | 0             | 0            | 0             |
|         | Firmicutes      | <b>TOTAL</b>    | 10793        | 72101         | 57486        | 62368         |
|         |                 |                 |              |               |              |               |
| seq169  | Fusobacteria    | Fusobacteriia   | 0            | 0             | 0            | 0             |
| seq1895 | Fusobacteria    | Fusobacteriia   | 0            | 0             | 0            | 0             |
| seq1243 | Fusobacteria    | Fusobacteriia   | 0            | 4             | 0            | 0             |
| seq1442 | Fusobacteria    | Fusobacteriia   | 0            | 0             | 0            | 0             |
|         | Fusobacteria    | <b>TOTAL</b>    | 0            | 4             | 0            | 0             |
|         |                 |                 |              |               |              |               |
| seq490  | Lentisphaerae   | Lentisphaeria   | 0            | 0             | 0            | 0             |
| seq617  | Lentisphaerae   | Lentisphaeria   | 0            | 0             | 0            | 0             |
| seq700  | Lentisphaerae   | Lentisphaeria   | 4            | 17            | 0            | 0             |
| seq966  | Lentisphaerae   | Lentisphaeria   | 0            | 0             | 0            | 0             |
| seq1387 | Lentisphaerae   | Lentisphaeria   | 0            | 0             | 0            | 0             |
| seq845  | Lentisphaerae   | Lentisphaeria   | 0            | 0             | 0            | 0             |
|         | Lentisphaerae   | <b>TOTAL</b>    | 4            | 17            | 0            | 0             |
|         |                 |                 |              |               |              |               |
| seq1349 | Patescibacteria | Saccharimonadia | 0            | 0             | 0            | 0             |
| seq1744 | Patescibacteria | Saccharimonadia | 0            | 0             | 0            | 0             |
| seq1851 | Patescibacteria | Saccharimonadia | 0            | 0             | 0            | 0             |
| seq1884 | Patescibacteria | Saccharimonadia | 0            | 0             | 0            | 0             |
|         | Patescibacteria | <b>TOTAL</b>    | 0            | 0             | 0            | 0             |

Sequence Count Table

|                | <b>Phylum</b>          | <b>Class</b>    | <b>Subject17WK0</b> | <b>Subject17WK12</b> | <b>Subject1WK0</b> | <b>Subject1WK12</b> |
|----------------|------------------------|-----------------|---------------------|----------------------|--------------------|---------------------|
| <b>seq1849</b> | Firmicutes             | Clostridia      | 0                   | 0                    | 0                  | 0                   |
| <b>seq1862</b> | Firmicutes             | Clostridia      | 0                   | 0                    | 0                  | 0                   |
| <b>seq1863</b> | Firmicutes             | Clostridia      | 0                   | 0                    | 0                  | 0                   |
| <b>seq1864</b> | Firmicutes             | Clostridia      | 0                   | 0                    | 0                  | 0                   |
| <b>seq1865</b> | Firmicutes             | Clostridia      | 0                   | 0                    | 0                  | 0                   |
| <b>seq1881</b> | Firmicutes             | Clostridia      | 0                   | 0                    | 0                  | 0                   |
| <b>seq1888</b> | Firmicutes             |                 | 0                   | 0                    | 0                  | 0                   |
| <b>seq1889</b> | Firmicutes             | Clostridia      | 0                   | 0                    | 0                  | 0                   |
| <b>seq1893</b> | Firmicutes             | Clostridia      | 0                   | 0                    | 0                  | 0                   |
| <b>seq1898</b> | Firmicutes             |                 | 0                   | 0                    | 0                  | 0                   |
| <b>seq1902</b> | Firmicutes             | Clostridia      | 0                   | 0                    | 0                  | 0                   |
|                | <b>Firmicutes</b>      | <b>TOTAL</b>    | <b>77965</b>        | <b>127850</b>        | <b>112302</b>      | <b>116787</b>       |
|                |                        |                 |                     |                      |                    |                     |
| <b>seq169</b>  | Fusobacteria           | Fusobacteriia   | 0                   | 0                    | 0                  | 0                   |
| <b>seq1895</b> | Fusobacteria           | Fusobacteriia   | 0                   | 0                    | 0                  | 0                   |
| <b>seq1243</b> | Fusobacteria           | Fusobacteriia   | 0                   | 0                    | 0                  | 0                   |
| <b>seq1442</b> | Fusobacteria           | Fusobacteriia   | 0                   | 0                    | 0                  | 0                   |
|                | <b>Fusobacteria</b>    | <b>TOTAL</b>    | <b>0</b>            | <b>0</b>             | <b>0</b>           | <b>0</b>            |
|                |                        |                 |                     |                      |                    |                     |
| <b>seq490</b>  | Lentisphaerae          | Lentisphaeria   | 0                   | 0                    | 0                  | 0                   |
| <b>seq617</b>  | Lentisphaerae          | Lentisphaeria   | 0                   | 0                    | 0                  | 0                   |
| <b>seq700</b>  | Lentisphaerae          | Lentisphaeria   | 0                   | 0                    | 0                  | 0                   |
| <b>seq966</b>  | Lentisphaerae          | Lentisphaeria   | 0                   | 0                    | 0                  | 0                   |
| <b>seq1387</b> | Lentisphaerae          | Lentisphaeria   | 0                   | 0                    | 0                  | 0                   |
| <b>seq845</b>  | Lentisphaerae          | Lentisphaeria   | 140                 | 88                   | 0                  | 0                   |
|                | <b>Lentisphaerae</b>   | <b>TOTAL</b>    | <b>140</b>          | <b>88</b>            | <b>0</b>           | <b>0</b>            |
|                |                        |                 |                     |                      |                    |                     |
| <b>seq1349</b> | Patescibacteria        | Saccharimonadia | 0                   | 0                    | 0                  | 0                   |
| <b>seq1744</b> | Patescibacteria        | Saccharimonadia | 0                   | 0                    | 0                  | 0                   |
| <b>seq1851</b> | Patescibacteria        | Saccharimonadia | 0                   | 0                    | 0                  | 0                   |
| <b>seq1884</b> | Patescibacteria        | Saccharimonadia | 0                   | 0                    | 0                  | 0                   |
|                | <b>Patescibacteria</b> | <b>TOTAL</b>    | <b>0</b>            | <b>0</b>             | <b>0</b>           | <b>0</b>            |

Sequence Count Table

|         | Phylum          | Class           | Subject2WK0 | Subject2WK12 | Subject3WK0 | Subject3WK12 |
|---------|-----------------|-----------------|-------------|--------------|-------------|--------------|
| seq1849 | Firmicutes      | Clostridia      | 0           | 0            | 0           | 0            |
| seq1862 | Firmicutes      | Clostridia      | 0           | 0            | 0           | 0            |
| seq1863 | Firmicutes      | Clostridia      | 0           | 0            | 0           | 0            |
| seq1864 | Firmicutes      | Clostridia      | 0           | 0            | 0           | 0            |
| seq1865 | Firmicutes      | Clostridia      | 0           | 0            | 0           | 0            |
| seq1881 | Firmicutes      | Clostridia      | 0           | 0            | 0           | 0            |
| seq1888 | Firmicutes      |                 | 0           | 0            | 0           | 0            |
| seq1889 | Firmicutes      | Clostridia      | 0           | 0            | 0           | 0            |
| seq1893 | Firmicutes      | Clostridia      | 0           | 0            | 0           | 0            |
| seq1898 | Firmicutes      |                 | 0           | 0            | 0           | 0            |
| seq1902 | Firmicutes      | Clostridia      | 0           | 0            | 0           | 0            |
|         | Firmicutes      | <b>TOTAL</b>    | 69271       | 66481        | 123703      | 66962        |
|         |                 |                 |             |              |             |              |
| seq169  | Fusobacteria    | Fusobacteriia   | 0           | 0            | 0           | 0            |
| seq1895 | Fusobacteria    | Fusobacteriia   | 0           | 0            | 0           | 0            |
| seq1243 | Fusobacteria    | Fusobacteriia   | 0           | 53           | 0           | 0            |
| seq1442 | Fusobacteria    | Fusobacteriia   | 0           | 35           | 0           | 0            |
|         | Fusobacteria    | <b>TOTAL</b>    | 0           | 88           | 0           | 0            |
|         |                 |                 |             |              |             |              |
| seq490  | Lentisphaerae   | Lentisphaeria   | 0           | 0            | 0           | 0            |
| seq617  | Lentisphaerae   | Lentisphaeria   | 0           | 0            | 0           | 0            |
| seq700  | Lentisphaerae   | Lentisphaeria   | 0           | 0            | 0           | 0            |
| seq966  | Lentisphaerae   | Lentisphaeria   | 0           | 0            | 0           | 0            |
| seq1387 | Lentisphaerae   | Lentisphaeria   | 0           | 0            | 0           | 0            |
| seq845  | Lentisphaerae   | Lentisphaeria   | 0           | 0            | 0           | 0            |
|         | Lentisphaerae   | <b>TOTAL</b>    | 0           | 0            | 0           | 0            |
|         |                 |                 |             |              |             |              |
| seq1349 | Patescibacteria | Saccharimonadia | 0           | 0            | 0           | 0            |
| seq1744 | Patescibacteria | Saccharimonadia | 0           | 0            | 10          | 0            |
| seq1851 | Patescibacteria | Saccharimonadia | 0           | 0            | 0           | 0            |
| seq1884 | Patescibacteria | Saccharimonadia | 0           | 0            | 0           | 0            |
|         | Patescibacteria | <b>TOTAL</b>    | 0           | 0            | 10          | 0            |

Sequence Count Table

|         | Phylum          | Class           | Subject4WK0 | Subject4WK12 | Subject5WK0 | Subject5WK12 |
|---------|-----------------|-----------------|-------------|--------------|-------------|--------------|
| seq1849 | Firmicutes      | Clostridia      | 0           | 0            | 0           | 0            |
| seq1862 | Firmicutes      | Clostridia      | 0           | 0            | 0           | 0            |
| seq1863 | Firmicutes      | Clostridia      | 0           | 0            | 0           | 0            |
| seq1864 | Firmicutes      | Clostridia      | 0           | 0            | 0           | 0            |
| seq1865 | Firmicutes      | Clostridia      | 0           | 0            | 0           | 0            |
| seq1881 | Firmicutes      | Clostridia      | 0           | 0            | 0           | 0            |
| seq1888 | Firmicutes      |                 | 0           | 0            | 0           | 0            |
| seq1889 | Firmicutes      | Clostridia      | 0           | 0            | 0           | 0            |
| seq1893 | Firmicutes      | Clostridia      | 0           | 0            | 0           | 0            |
| seq1898 | Firmicutes      |                 | 0           | 0            | 0           | 0            |
| seq1902 | Firmicutes      | Clostridia      | 0           | 0            | 0           | 0            |
|         | Firmicutes      | <b>TOTAL</b>    | 104302      | 76360        | 63279       | 77961        |
|         |                 |                 |             |              |             |              |
| seq169  | Fusobacteria    | Fusobacteriia   | 0           | 0            | 0           | 0            |
| seq1895 | Fusobacteria    | Fusobacteriia   | 0           | 0            | 0           | 0            |
| seq1243 | Fusobacteria    | Fusobacteriia   | 0           | 0            | 0           | 0            |
| seq1442 | Fusobacteria    | Fusobacteriia   | 0           | 0            | 0           | 0            |
|         | Fusobacteria    | <b>TOTAL</b>    | 0           | 0            | 0           | 0            |
|         |                 |                 |             |              |             |              |
| seq490  | Lentisphaerae   | Lentisphaeria   | 0           | 0            | 0           | 0            |
| seq617  | Lentisphaerae   | Lentisphaeria   | 0           | 0            | 0           | 0            |
| seq700  | Lentisphaerae   | Lentisphaeria   | 27          | 62           | 0           | 0            |
| seq966  | Lentisphaerae   | Lentisphaeria   | 0           | 0            | 0           | 0            |
| seq1387 | Lentisphaerae   | Lentisphaeria   | 0           | 0            | 0           | 0            |
| seq845  | Lentisphaerae   | Lentisphaeria   | 0           | 0            | 0           | 0            |
|         | Lentisphaerae   | <b>TOTAL</b>    | 27          | 62           | 0           | 0            |
|         |                 |                 |             |              |             |              |
| seq1349 | Patescibacteria | Saccharimonadia | 8           | 16           | 0           | 0            |
| seq1744 | Patescibacteria | Saccharimonadia | 0           | 0            | 0           | 0            |
| seq1851 | Patescibacteria | Saccharimonadia | 0           | 0            | 0           | 0            |
| seq1884 | Patescibacteria | Saccharimonadia | 0           | 0            | 0           | 0            |
|         | Patescibacteria | <b>TOTAL</b>    | 8           | 16           | 0           | 0            |

Sequence Count Table

|         | Phylum          | Class           | Subject6WK0  | Subject6WK12  | Subject18WK0 | Subject18WK12 |
|---------|-----------------|-----------------|--------------|---------------|--------------|---------------|
| seq1849 | Firmicutes      | Clostridia      | 5            | 0             | 0            | 0             |
| seq1862 | Firmicutes      | Clostridia      | 0            | 0             | 0            | 0             |
| seq1863 | Firmicutes      | Clostridia      | 0            | 0             | 0            | 0             |
| seq1864 | Firmicutes      | Clostridia      | 0            | 0             | 0            | 0             |
| seq1865 | Firmicutes      | Clostridia      | 0            | 0             | 0            | 0             |
| seq1881 | Firmicutes      | Clostridia      | 0            | 0             | 0            | 0             |
| seq1888 | Firmicutes      |                 | 0            | 0             | 0            | 0             |
| seq1889 | Firmicutes      | Clostridia      | 0            | 0             | 0            | 0             |
| seq1893 | Firmicutes      | Clostridia      | 0            | 0             | 0            | 0             |
| seq1898 | Firmicutes      |                 | 0            | 0             | 0            | 0             |
| seq1902 | Firmicutes      | Clostridia      | 0            | 0             | 0            | 0             |
|         | Firmicutes      | <b>TOTAL</b>    | <b>84343</b> | <b>113239</b> | <b>95851</b> | <b>72311</b>  |
|         |                 |                 |              |               |              |               |
| seq169  | Fusobacteria    | Fusobacteriia   | 0            | 0             | 0            | 0             |
| seq1895 | Fusobacteria    | Fusobacteriia   | 0            | 0             | 0            | 0             |
| seq1243 | Fusobacteria    | Fusobacteriia   | 0            | 7             | 0            | 0             |
| seq1442 | Fusobacteria    | Fusobacteriia   | 0            | 0             | 0            | 0             |
|         | Fusobacteria    | <b>TOTAL</b>    | <b>0</b>     | <b>7</b>      | <b>0</b>     | <b>0</b>      |
|         |                 |                 |              |               |              |               |
| seq490  | Lentisphaerae   | Lentisphaeria   | 0            | 0             | 0            | 0             |
| seq617  | Lentisphaerae   | Lentisphaeria   | 0            | 0             | 0            | 0             |
| seq700  | Lentisphaerae   | Lentisphaeria   | 0            | 0             | 0            | 0             |
| seq966  | Lentisphaerae   | Lentisphaeria   | 0            | 0             | 0            | 0             |
| seq1387 | Lentisphaerae   | Lentisphaeria   | 0            | 0             | 0            | 0             |
| seq845  | Lentisphaerae   | Lentisphaeria   | 0            | 0             | 0            | 0             |
|         | Lentisphaerae   | <b>TOTAL</b>    | <b>0</b>     | <b>0</b>      | <b>0</b>     | <b>0</b>      |
|         |                 |                 |              |               |              |               |
| seq1349 | Patescibacteria | Saccharimonadia | 0            | 0             | 0            | 0             |
| seq1744 | Patescibacteria | Saccharimonadia | 0            | 0             | 0            | 0             |
| seq1851 | Patescibacteria | Saccharimonadia | 0            | 0             | 0            | 0             |
| seq1884 | Patescibacteria | Saccharimonadia | 0            | 0             | 0            | 0             |
|         | Patescibacteria | <b>TOTAL</b>    | <b>0</b>     | <b>0</b>      | <b>0</b>     | <b>0</b>      |



Sequence Count Table

|         | Phylum          | Class           | Subject19WK0 | Subject19WK12 | Subject20WK0 | Subject20WK12 |
|---------|-----------------|-----------------|--------------|---------------|--------------|---------------|
| seq1849 | Firmicutes      | Clostridia      | 0            | 0             | 0            | 0             |
| seq1862 | Firmicutes      | Clostridia      | 0            | 0             | 0            | 0             |
| seq1863 | Firmicutes      | Clostridia      | 0            | 0             | 0            | 0             |
| seq1864 | Firmicutes      | Clostridia      | 0            | 0             | 0            | 0             |
| seq1865 | Firmicutes      | Clostridia      | 0            | 0             | 0            | 0             |
| seq1881 | Firmicutes      | Clostridia      | 0            | 0             | 0            | 0             |
| seq1888 | Firmicutes      |                 | 0            | 0             | 0            | 0             |
| seq1889 | Firmicutes      | Clostridia      | 0            | 0             | 0            | 0             |
| seq1893 | Firmicutes      | Clostridia      | 0            | 0             | 0            | 0             |
| seq1898 | Firmicutes      |                 | 0            | 0             | 2            | 0             |
| seq1902 | Firmicutes      | Clostridia      | 0            | 0             | 0            | 0             |
|         | Firmicutes      | <b>TOTAL</b>    | 89136        | 88173         | 61975        | 75912         |
|         |                 |                 |              |               |              |               |
| seq169  | Fusobacteria    | Fusobacteriia   | 0            | 0             | 0            | 0             |
| seq1895 | Fusobacteria    | Fusobacteriia   | 0            | 0             | 0            | 0             |
| seq1243 | Fusobacteria    | Fusobacteriia   | 0            | 0             | 0            | 0             |
| seq1442 | Fusobacteria    | Fusobacteriia   | 0            | 0             | 0            | 0             |
|         | Fusobacteria    | <b>TOTAL</b>    | 0            | 0             | 0            | 0             |
|         |                 |                 |              |               |              |               |
| seq490  | Lentisphaerae   | Lentisphaeria   | 0            | 0             | 0            | 0             |
| seq617  | Lentisphaerae   | Lentisphaeria   | 0            | 0             | 23           | 0             |
| seq700  | Lentisphaerae   | Lentisphaeria   | 0            | 0             | 0            | 0             |
| seq966  | Lentisphaerae   | Lentisphaeria   | 0            | 0             | 152          | 5             |
| seq1387 | Lentisphaerae   | Lentisphaeria   | 0            | 0             | 38           | 5             |
| seq845  | Lentisphaerae   | Lentisphaeria   | 0            | 0             | 0            | 0             |
|         | Lentisphaerae   | <b>TOTAL</b>    | 0            | 0             | 213          | 10            |
|         |                 |                 |              |               |              |               |
| seq1349 | Patescibacteria | Saccharimonadia | 0            | 0             | 0            | 0             |
| seq1744 | Patescibacteria | Saccharimonadia | 0            | 0             | 0            | 0             |
| seq1851 | Patescibacteria | Saccharimonadia | 0            | 0             | 0            | 5             |
| seq1884 | Patescibacteria | Saccharimonadia | 0            | 0             | 0            | 0             |
|         | Patescibacteria | <b>TOTAL</b>    | 0            | 0             | 0            | 5             |

Sequence Count Table

|         | Phylum          | Class           | Subject7WK0 | Subject7WK12 | Subject21WK0 | Subject21WK12 |
|---------|-----------------|-----------------|-------------|--------------|--------------|---------------|
| seq1849 | Firmicutes      | Clostridia      | 0           | 0            | 0            | 0             |
| seq1862 | Firmicutes      | Clostridia      | 0           | 0            | 0            | 0             |
| seq1863 | Firmicutes      | Clostridia      | 0           | 0            | 0            | 0             |
| seq1864 | Firmicutes      | Clostridia      | 0           | 0            | 0            | 0             |
| seq1865 | Firmicutes      | Clostridia      | 0           | 0            | 0            | 0             |
| seq1881 | Firmicutes      | Clostridia      | 0           | 4            | 0            | 0             |
| seq1888 | Firmicutes      |                 | 0           | 0            | 0            | 0             |
| seq1889 | Firmicutes      | Clostridia      | 0           | 0            | 0            | 0             |
| seq1893 | Firmicutes      | Clostridia      | 0           | 0            | 0            | 0             |
| seq1898 | Firmicutes      |                 | 0           | 0            | 0            | 0             |
| seq1902 | Firmicutes      | Clostridia      | 0           | 0            | 0            | 0             |
|         | Firmicutes      | <b>TOTAL</b>    | 89527       | 89759        | 116026       | 92975         |
|         |                 |                 |             |              |              |               |
| seq169  | Fusobacteria    | Fusobacteriia   | 0           | 0            | 0            | 0             |
| seq1895 | Fusobacteria    | Fusobacteriia   | 0           | 0            | 0            | 0             |
| seq1243 | Fusobacteria    | Fusobacteriia   | 0           | 0            | 0            | 0             |
| seq1442 | Fusobacteria    | Fusobacteriia   | 0           | 0            | 0            | 0             |
|         | Fusobacteria    | <b>TOTAL</b>    | 0           | 0            | 0            | 0             |
|         |                 |                 |             |              |              |               |
| seq490  | Lentisphaerae   | Lentisphaeria   | 0           | 0            | 0            | 0             |
| seq617  | Lentisphaerae   | Lentisphaeria   | 0           | 0            | 0            | 0             |
| seq700  | Lentisphaerae   | Lentisphaeria   | 0           | 0            | 0            | 0             |
| seq966  | Lentisphaerae   | Lentisphaeria   | 0           | 0            | 0            | 0             |
| seq1387 | Lentisphaerae   | Lentisphaeria   | 0           | 0            | 0            | 0             |
| seq845  | Lentisphaerae   | Lentisphaeria   | 0           | 0            | 0            | 0             |
|         | Lentisphaerae   | <b>TOTAL</b>    | 0           | 0            | 0            | 0             |
|         |                 |                 |             |              |              |               |
| seq1349 | Patescibacteria | Saccharimonadia | 0           | 0            | 0            | 0             |
| seq1744 | Patescibacteria | Saccharimonadia | 0           | 0            | 0            | 0             |
| seq1851 | Patescibacteria | Saccharimonadia | 0           | 0            | 0            | 0             |
| seq1884 | Patescibacteria | Saccharimonadia | 0           | 0            | 0            | 0             |
|         | Patescibacteria | <b>TOTAL</b>    | 0           | 0            | 0            | 0             |

Sequence Count Table

|         | Phylum          | Class           | Subject8WK0 | Subject8WK12 | Subject9WK0 | Subject9WK12 |
|---------|-----------------|-----------------|-------------|--------------|-------------|--------------|
| seq1849 | Firmicutes      | Clostridia      | 0           | 0            | 0           | 0            |
| seq1862 | Firmicutes      | Clostridia      | 0           | 0            | 0           | 0            |
| seq1863 | Firmicutes      | Clostridia      | 0           | 0            | 0           | 0            |
| seq1864 | Firmicutes      | Clostridia      | 0           | 0            | 0           | 0            |
| seq1865 | Firmicutes      | Clostridia      | 0           | 0            | 0           | 0            |
| seq1881 | Firmicutes      | Clostridia      | 0           | 0            | 0           | 0            |
| seq1888 | Firmicutes      |                 | 0           | 0            | 0           | 0            |
| seq1889 | Firmicutes      | Clostridia      | 0           | 0            | 0           | 0            |
| seq1893 | Firmicutes      | Clostridia      | 0           | 0            | 0           | 0            |
| seq1898 | Firmicutes      |                 | 0           | 0            | 0           | 0            |
| seq1902 | Firmicutes      | Clostridia      | 0           | 0            | 0           | 0            |
|         | Firmicutes      | <b>TOTAL</b>    | 71844       | 86717        | 52490       | 49268        |
|         |                 |                 |             |              |             |              |
| seq169  | Fusobacteria    | Fusobacteriia   | 0           | 0            | 0           | 0            |
| seq1895 | Fusobacteria    | Fusobacteriia   | 0           | 0            | 0           | 0            |
| seq1243 | Fusobacteria    | Fusobacteriia   | 0           | 0            | 0           | 0            |
| seq1442 | Fusobacteria    | Fusobacteriia   | 0           | 0            | 0           | 0            |
|         | Fusobacteria    | <b>TOTAL</b>    | 0           | 0            | 0           | 0            |
|         |                 |                 |             |              |             |              |
| seq490  | Lentisphaerae   | Lentisphaeria   | 0           | 0            | 0           | 0            |
| seq617  | Lentisphaerae   | Lentisphaeria   | 120         | 60           | 0           | 0            |
| seq700  | Lentisphaerae   | Lentisphaeria   | 0           | 0            | 0           | 0            |
| seq966  | Lentisphaerae   | Lentisphaeria   | 0           | 0            | 0           | 0            |
| seq1387 | Lentisphaerae   | Lentisphaeria   | 0           | 0            | 0           | 0            |
| seq845  | Lentisphaerae   | Lentisphaeria   | 0           | 0            | 0           | 0            |
|         | Lentisphaerae   | <b>TOTAL</b>    | 120         | 60           | 0           | 0            |
|         |                 |                 |             |              |             |              |
| seq1349 | Patescibacteria | Saccharimonadia | 0           | 7            | 0           | 0            |
| seq1744 | Patescibacteria | Saccharimonadia | 0           | 0            | 0           | 0            |
| seq1851 | Patescibacteria | Saccharimonadia | 0           | 0            | 0           | 0            |
| seq1884 | Patescibacteria | Saccharimonadia | 0           | 0            | 0           | 0            |
|         | Patescibacteria | <b>TOTAL</b>    | 0           | 7            | 0           | 0            |

Sequence Count Table

|         | Phylum          | Class           | Subject10WK0 | Subject10WK12 | Subject22WK0 | Subject22WK12 |
|---------|-----------------|-----------------|--------------|---------------|--------------|---------------|
| seq1849 | Firmicutes      | Clostridia      | 0            | 0             | 0            | 0             |
| seq1862 | Firmicutes      | Clostridia      | 0            | 0             | 0            | 0             |
| seq1863 | Firmicutes      | Clostridia      | 0            | 0             | 0            | 0             |
| seq1864 | Firmicutes      | Clostridia      | 0            | 0             | 0            | 0             |
| seq1865 | Firmicutes      | Clostridia      | 0            | 0             | 0            | 0             |
| seq1881 | Firmicutes      | Clostridia      | 0            | 0             | 0            | 0             |
| seq1888 | Firmicutes      |                 | 0            | 0             | 0            | 0             |
| seq1889 | Firmicutes      | Clostridia      | 0            | 0             | 0            | 0             |
| seq1893 | Firmicutes      | Clostridia      | 0            | 0             | 0            | 0             |
| seq1898 | Firmicutes      |                 | 0            | 0             | 0            | 0             |
| seq1902 | Firmicutes      | Clostridia      | 0            | 0             | 0            | 0             |
|         | Firmicutes      | <b>TOTAL</b>    | 82986        | 52061         | 84301        | 81089         |
|         |                 |                 |              |               |              |               |
| seq169  | Fusobacteria    | Fusobacteriia   | 0            | 0             | 0            | 0             |
| seq1895 | Fusobacteria    | Fusobacteriia   | 0            | 0             | 0            | 0             |
| seq1243 | Fusobacteria    | Fusobacteriia   | 0            | 0             | 0            | 0             |
| seq1442 | Fusobacteria    | Fusobacteriia   | 0            | 0             | 0            | 0             |
|         | Fusobacteria    | <b>TOTAL</b>    | 0            | 0             | 0            | 0             |
|         |                 |                 |              |               |              |               |
| seq490  | Lentisphaerae   | Lentisphaeria   | 0            | 0             | 306          | 501           |
| seq617  | Lentisphaerae   | Lentisphaeria   | 0            | 0             | 50           | 55            |
| seq700  | Lentisphaerae   | Lentisphaeria   | 0            | 0             | 0            | 0             |
| seq966  | Lentisphaerae   | Lentisphaeria   | 0            | 0             | 0            | 0             |
| seq1387 | Lentisphaerae   | Lentisphaeria   | 0            | 0             | 0            | 0             |
| seq845  | Lentisphaerae   | Lentisphaeria   | 0            | 0             | 0            | 0             |
|         | Lentisphaerae   | <b>TOTAL</b>    | 0            | 0             | 356          | 556           |
|         |                 |                 |              |               |              |               |
| seq1349 | Patescibacteria | Saccharimonadia | 0            | 0             | 0            | 0             |
| seq1744 | Patescibacteria | Saccharimonadia | 0            | 0             | 0            | 0             |
| seq1851 | Patescibacteria | Saccharimonadia | 0            | 0             | 0            | 0             |
| seq1884 | Patescibacteria | Saccharimonadia | 0            | 0             | 0            | 0             |
|         | Patescibacteria | <b>TOTAL</b>    | 0            | 0             | 0            | 0             |

Sequence Count Table

|                | <b>Phylum</b>          | <b>Class</b>    | <b>Subject23WK0</b> | <b>Subject23WK12</b> | <b>Subject24WK0</b> | <b>Subject24WK12</b> |
|----------------|------------------------|-----------------|---------------------|----------------------|---------------------|----------------------|
| <b>seq1849</b> | Firmicutes             | Clostridia      | 0                   | 0                    | 0                   | 0                    |
| <b>seq1862</b> | Firmicutes             | Clostridia      | 0                   | 0                    | 5                   | 0                    |
| <b>seq1863</b> | Firmicutes             | Clostridia      | 0                   | 0                    | 0                   | 5                    |
| <b>seq1864</b> | Firmicutes             | Clostridia      | 0                   | 0                    | 0                   | 0                    |
| <b>seq1865</b> | Firmicutes             | Clostridia      | 0                   | 0                    | 0                   | 0                    |
| <b>seq1881</b> | Firmicutes             | Clostridia      | 0                   | 0                    | 0                   | 0                    |
| <b>seq1888</b> | Firmicutes             |                 | 0                   | 0                    | 0                   | 0                    |
| <b>seq1889</b> | Firmicutes             | Clostridia      | 0                   | 0                    | 0                   | 0                    |
| <b>seq1893</b> | Firmicutes             | Clostridia      | 0                   | 0                    | 0                   | 0                    |
| <b>seq1898</b> | Firmicutes             |                 | 0                   | 0                    | 0                   | 0                    |
| <b>seq1902</b> | Firmicutes             | Clostridia      | 0                   | 0                    | 2                   | 0                    |
|                | <b>Firmicutes</b>      | <b>TOTAL</b>    | <b>62993</b>        | <b>96242</b>         | <b>117868</b>       | <b>86112</b>         |
|                |                        |                 |                     |                      |                     |                      |
| <b>seq169</b>  | Fusobacteria           | Fusobacteriia   | 0                   | 0                    | 0                   | 0                    |
| <b>seq1895</b> | Fusobacteria           | Fusobacteriia   | 0                   | 0                    | 0                   | 0                    |
| <b>seq1243</b> | Fusobacteria           | Fusobacteriia   | 0                   | 0                    | 0                   | 0                    |
| <b>seq1442</b> | Fusobacteria           | Fusobacteriia   | 0                   | 0                    | 0                   | 0                    |
|                | <b>Fusobacteria</b>    | <b>TOTAL</b>    | <b>0</b>            | <b>0</b>             | <b>0</b>            | <b>0</b>             |
|                |                        |                 |                     |                      |                     |                      |
| <b>seq490</b>  | Lentisphaerae          | Lentisphaeria   | 0                   | 0                    | 0                   | 0                    |
| <b>seq617</b>  | Lentisphaerae          | Lentisphaeria   | 26                  | 9                    | 0                   | 0                    |
| <b>seq700</b>  | Lentisphaerae          | Lentisphaeria   | 45                  | 60                   | 0                   | 0                    |
| <b>seq966</b>  | Lentisphaerae          | Lentisphaeria   | 0                   | 0                    | 0                   | 0                    |
| <b>seq1387</b> | Lentisphaerae          | Lentisphaeria   | 0                   | 0                    | 0                   | 0                    |
| <b>seq845</b>  | Lentisphaerae          | Lentisphaeria   | 0                   | 0                    | 0                   | 0                    |
|                | <b>Lentisphaerae</b>   | <b>TOTAL</b>    | <b>71</b>           | <b>69</b>            | <b>0</b>            | <b>0</b>             |
|                |                        |                 |                     |                      |                     |                      |
| <b>seq1349</b> | Patescibacteria        | Saccharimonadia | 0                   | 0                    | 0                   | 0                    |
| <b>seq1744</b> | Patescibacteria        | Saccharimonadia | 0                   | 0                    | 0                   | 0                    |
| <b>seq1851</b> | Patescibacteria        | Saccharimonadia | 0                   | 0                    | 0                   | 0                    |
| <b>seq1884</b> | Patescibacteria        | Saccharimonadia | 0                   | 0                    | 0                   | 0                    |
|                | <b>Patescibacteria</b> | <b>TOTAL</b>    | <b>0</b>            | <b>0</b>             | <b>0</b>            | <b>0</b>             |

Sequence Count Table

|         | Phylum          | Class           | Subject11WK0 | Subject11WK12 | Subject12WK0 | Subject12WK12 |
|---------|-----------------|-----------------|--------------|---------------|--------------|---------------|
| seq1849 | Firmicutes      | Clostridia      | 0            | 0             | 0            | 0             |
| seq1862 | Firmicutes      | Clostridia      | 0            | 0             | 0            | 0             |
| seq1863 | Firmicutes      | Clostridia      | 0            | 0             | 0            | 0             |
| seq1864 | Firmicutes      | Clostridia      | 0            | 0             | 0            | 0             |
| seq1865 | Firmicutes      | Clostridia      | 0            | 0             | 0            | 0             |
| seq1881 | Firmicutes      | Clostridia      | 0            | 0             | 0            | 0             |
| seq1888 | Firmicutes      |                 | 0            | 0             | 0            | 0             |
| seq1889 | Firmicutes      | Clostridia      | 0            | 0             | 0            | 0             |
| seq1893 | Firmicutes      | Clostridia      | 0            | 0             | 0            | 0             |
| seq1898 | Firmicutes      |                 | 0            | 0             | 0            | 0             |
| seq1902 | Firmicutes      | Clostridia      | 0            | 0             | 0            | 0             |
|         | Firmicutes      | <b>TOTAL</b>    | 70115        | 71785         | 44198        | 61347         |
|         |                 |                 |              |               |              |               |
| seq169  | Fusobacteria    | Fusobacteriia   | 0            | 0             | 0            | 0             |
| seq1895 | Fusobacteria    | Fusobacteriia   | 0            | 0             | 0            | 0             |
| seq1243 | Fusobacteria    | Fusobacteriia   | 0            | 0             | 0            | 0             |
| seq1442 | Fusobacteria    | Fusobacteriia   | 0            | 0             | 0            | 0             |
|         | Fusobacteria    | <b>TOTAL</b>    | 0            | 0             | 0            | 0             |
|         |                 |                 |              |               |              |               |
| seq490  | Lentisphaerae   | Lentisphaeria   | 0            | 0             | 0            | 0             |
| seq617  | Lentisphaerae   | Lentisphaeria   | 0            | 0             | 0            | 0             |
| seq700  | Lentisphaerae   | Lentisphaeria   | 0            | 0             | 0            | 0             |
| seq966  | Lentisphaerae   | Lentisphaeria   | 0            | 0             | 0            | 0             |
| seq1387 | Lentisphaerae   | Lentisphaeria   | 0            | 0             | 0            | 0             |
| seq845  | Lentisphaerae   | Lentisphaeria   | 0            | 0             | 0            | 0             |
|         | Lentisphaerae   | <b>TOTAL</b>    | 0            | 0             | 0            | 0             |
|         |                 |                 |              |               |              |               |
| seq1349 | Patescibacteria | Saccharimonadia | 0            | 0             | 0            | 0             |
| seq1744 | Patescibacteria | Saccharimonadia | 0            | 0             | 0            | 0             |
| seq1851 | Patescibacteria | Saccharimonadia | 0            | 0             | 0            | 0             |
| seq1884 | Patescibacteria | Saccharimonadia | 0            | 0             | 0            | 0             |
|         | Patescibacteria | <b>TOTAL</b>    | 0            | 0             | 0            | 0             |

Sequence Count Table

|         | Phylum          | Class           | Subject25WK0 | Subject25WK12 | Subject38WK0 | Subject38WK12 |
|---------|-----------------|-----------------|--------------|---------------|--------------|---------------|
| seq1849 | Firmicutes      | Clostridia      | 0            | 0             | 0            | 0             |
| seq1862 | Firmicutes      | Clostridia      | 0            | 0             | 0            | 0             |
| seq1863 | Firmicutes      | Clostridia      | 0            | 0             | 0            | 0             |
| seq1864 | Firmicutes      | Clostridia      | 5            | 0             | 0            | 0             |
| seq1865 | Firmicutes      | Clostridia      | 0            | 5             | 0            | 0             |
| seq1881 | Firmicutes      | Clostridia      | 0            | 0             | 0            | 0             |
| seq1888 | Firmicutes      |                 | 0            | 3             | 0            | 0             |
| seq1889 | Firmicutes      | Clostridia      | 0            | 0             | 0            | 0             |
| seq1893 | Firmicutes      | Clostridia      | 0            | 0             | 0            | 0             |
| seq1898 | Firmicutes      |                 | 0            | 0             | 0            | 0             |
| seq1902 | Firmicutes      | Clostridia      | 0            | 0             | 0            | 0             |
|         | Firmicutes      | <b>TOTAL</b>    | 74936        | 67641         | 225          | 72            |
|         |                 |                 |              |               |              |               |
| seq169  | Fusobacteria    | Fusobacteriia   | 0            | 0             | 0            | 0             |
| seq1895 | Fusobacteria    | Fusobacteriia   | 0            | 0             | 0            | 0             |
| seq1243 | Fusobacteria    | Fusobacteriia   | 0            | 4             | 0            | 0             |
| seq1442 | Fusobacteria    | Fusobacteriia   | 0            | 0             | 0            | 0             |
|         | Fusobacteria    | <b>TOTAL</b>    | 0            | 4             | 0            | 0             |
|         |                 |                 |              |               |              |               |
| seq490  | Lentisphaerae   | Lentisphaeria   | 0            | 0             | 0            | 0             |
| seq617  | Lentisphaerae   | Lentisphaeria   | 84           | 13            | 0            | 0             |
| seq700  | Lentisphaerae   | Lentisphaeria   | 0            | 0             | 0            | 0             |
| seq966  | Lentisphaerae   | Lentisphaeria   | 0            | 0             | 0            | 0             |
| seq1387 | Lentisphaerae   | Lentisphaeria   | 0            | 0             | 0            | 0             |
| seq845  | Lentisphaerae   | Lentisphaeria   | 0            | 0             | 0            | 0             |
|         | Lentisphaerae   | <b>TOTAL</b>    | 84           | 13            | 0            | 0             |
|         |                 |                 |              |               |              |               |
| seq1349 | Patescibacteria | Saccharimonadia | 0            | 0             | 0            | 0             |
| seq1744 | Patescibacteria | Saccharimonadia | 0            | 0             | 0            | 0             |
| seq1851 | Patescibacteria | Saccharimonadia | 0            | 0             | 0            | 0             |
| seq1884 | Patescibacteria | Saccharimonadia | 0            | 0             | 0            | 0             |
|         | Patescibacteria | <b>TOTAL</b>    | 0            | 0             | 0            | 0             |

Sequence Count Table

|         | Phylum          | Class           | Subject31WK0 | Subject31WK12 | Subject32WK0 | Subject32WK12 |
|---------|-----------------|-----------------|--------------|---------------|--------------|---------------|
| seq1849 | Firmicutes      | Clostridia      | 0            | 0             | 0            | 0             |
| seq1862 | Firmicutes      | Clostridia      | 0            | 0             | 0            | 0             |
| seq1863 | Firmicutes      | Clostridia      | 0            | 0             | 0            | 0             |
| seq1864 | Firmicutes      | Clostridia      | 0            | 0             | 0            | 0             |
| seq1865 | Firmicutes      | Clostridia      | 0            | 0             | 0            | 0             |
| seq1881 | Firmicutes      | Clostridia      | 0            | 0             | 0            | 0             |
| seq1888 | Firmicutes      |                 | 0            | 0             | 0            | 0             |
| seq1889 | Firmicutes      | Clostridia      | 0            | 0             | 0            | 0             |
| seq1893 | Firmicutes      | Clostridia      | 0            | 0             | 0            | 0             |
| seq1898 | Firmicutes      |                 | 0            | 0             | 0            | 0             |
| seq1902 | Firmicutes      | Clostridia      | 0            | 0             | 0            | 0             |
|         | Firmicutes      | <b>TOTAL</b>    | 166          | 69            | 52768        | 503           |
|         |                 |                 |              |               |              |               |
| seq169  | Fusobacteria    | Fusobacteriia   | 0            | 0             | 0            | 0             |
| seq1895 | Fusobacteria    | Fusobacteriia   | 0            | 0             | 0            | 0             |
| seq1243 | Fusobacteria    | Fusobacteriia   | 0            | 0             | 0            | 0             |
| seq1442 | Fusobacteria    | Fusobacteriia   | 0            | 0             | 0            | 0             |
|         | Fusobacteria    | <b>TOTAL</b>    | 0            | 0             | 0            | 0             |
|         |                 |                 |              |               |              |               |
| seq490  | Lentisphaerae   | Lentisphaeria   | 0            | 0             | 0            | 0             |
| seq617  | Lentisphaerae   | Lentisphaeria   | 0            | 0             | 0            | 0             |
| seq700  | Lentisphaerae   | Lentisphaeria   | 0            | 0             | 0            | 0             |
| seq966  | Lentisphaerae   | Lentisphaeria   | 0            | 0             | 0            | 0             |
| seq1387 | Lentisphaerae   | Lentisphaeria   | 0            | 0             | 0            | 0             |
| seq845  | Lentisphaerae   | Lentisphaeria   | 0            | 0             | 0            | 0             |
|         | Lentisphaerae   | <b>TOTAL</b>    | 0            | 0             | 0            | 0             |
|         |                 |                 |              |               |              |               |
| seq1349 | Patescibacteria | Saccharimonadia | 0            | 0             | 11           | 0             |
| seq1744 | Patescibacteria | Saccharimonadia | 0            | 0             | 0            | 0             |
| seq1851 | Patescibacteria | Saccharimonadia | 0            | 0             | 0            | 0             |
| seq1884 | Patescibacteria | Saccharimonadia | 0            | 0             | 0            | 0             |
|         | Patescibacteria | <b>TOTAL</b>    | 0            | 0             | 11           | 0             |



Sequence Count Table

|         | Phylum          | Class           | Subject13WK0 | Subject13WK12 | Subject39WK0 | Subject39WK12 |
|---------|-----------------|-----------------|--------------|---------------|--------------|---------------|
| seq1849 | Firmicutes      | Clostridia      | 0            | 0             | 0            | 0             |
| seq1862 | Firmicutes      | Clostridia      | 0            | 0             | 0            | 0             |
| seq1863 | Firmicutes      | Clostridia      | 0            | 0             | 0            | 0             |
| seq1864 | Firmicutes      | Clostridia      | 0            | 0             | 0            | 0             |
| seq1865 | Firmicutes      | Clostridia      | 0            | 0             | 0            | 0             |
| seq1881 | Firmicutes      | Clostridia      | 0            | 0             | 0            | 0             |
| seq1888 | Firmicutes      |                 | 0            | 0             | 0            | 0             |
| seq1889 | Firmicutes      | Clostridia      | 3            | 0             | 0            | 0             |
| seq1893 | Firmicutes      | Clostridia      | 0            | 0             | 0            | 0             |
| seq1898 | Firmicutes      |                 | 0            | 0             | 0            | 0             |
| seq1902 | Firmicutes      | Clostridia      | 0            | 0             | 0            | 0             |
|         | Firmicutes      | <b>TOTAL</b>    | 74211        | 54038         | 67           | 47621         |
|         |                 |                 |              |               |              |               |
| seq169  | Fusobacteria    | Fusobacteriia   | 0            | 0             | 0            | 0             |
| seq1895 | Fusobacteria    | Fusobacteriia   | 0            | 0             | 0            | 0             |
| seq1243 | Fusobacteria    | Fusobacteriia   | 0            | 0             | 0            | 0             |
| seq1442 | Fusobacteria    | Fusobacteriia   | 0            | 0             | 0            | 0             |
|         | Fusobacteria    | <b>TOTAL</b>    | 0            | 0             | 0            | 0             |
|         |                 |                 |              |               |              |               |
| seq490  | Lentisphaerae   | Lentisphaeria   | 0            | 0             | 0            | 0             |
| seq617  | Lentisphaerae   | Lentisphaeria   | 0            | 0             | 0            | 0             |
| seq700  | Lentisphaerae   | Lentisphaeria   | 0            | 0             | 0            | 0             |
| seq966  | Lentisphaerae   | Lentisphaeria   | 0            | 0             | 0            | 0             |
| seq1387 | Lentisphaerae   | Lentisphaeria   | 0            | 0             | 0            | 0             |
| seq845  | Lentisphaerae   | Lentisphaeria   | 0            | 0             | 0            | 0             |
|         | Lentisphaerae   | <b>TOTAL</b>    | 0            | 0             | 0            | 0             |
|         |                 |                 |              |               |              |               |
| seq1349 | Patescibacteria | Saccharimonadia | 0            | 0             | 0            | 0             |
| seq1744 | Patescibacteria | Saccharimonadia | 0            | 0             | 0            | 0             |
| seq1851 | Patescibacteria | Saccharimonadia | 0            | 0             | 0            | 0             |
| seq1884 | Patescibacteria | Saccharimonadia | 0            | 4             | 0            | 0             |
|         | Patescibacteria | <b>TOTAL</b>    | 0            | 4             | 0            | 0             |

Sequence Count Table

|         | Phylum          | Class           | Subject26WK0 | Subject26WK12 | Subject14WK0 | Subject14WK12 |
|---------|-----------------|-----------------|--------------|---------------|--------------|---------------|
| seq1849 | Firmicutes      | Clostridia      | 0            | 0             | 0            | 0             |
| seq1862 | Firmicutes      | Clostridia      | 0            | 0             | 0            | 0             |
| seq1863 | Firmicutes      | Clostridia      | 0            | 0             | 0            | 0             |
| seq1864 | Firmicutes      | Clostridia      | 0            | 0             | 0            | 0             |
| seq1865 | Firmicutes      | Clostridia      | 0            | 0             | 0            | 0             |
| seq1881 | Firmicutes      | Clostridia      | 0            | 0             | 0            | 0             |
| seq1888 | Firmicutes      |                 | 0            | 0             | 0            | 0             |
| seq1889 | Firmicutes      | Clostridia      | 0            | 0             | 0            | 0             |
| seq1893 | Firmicutes      | Clostridia      | 3            | 0             | 0            | 0             |
| seq1898 | Firmicutes      |                 | 0            | 0             | 0            | 0             |
| seq1902 | Firmicutes      | Clostridia      | 0            | 0             | 0            | 0             |
|         | Firmicutes      | <b>TOTAL</b>    | 68947        | 64098         | 77352        | 91091         |
|         |                 |                 |              |               |              |               |
| seq169  | Fusobacteria    | Fusobacteriia   | 0            | 0             | 0            | 0             |
| seq1895 | Fusobacteria    | Fusobacteriia   | 0            | 0             | 0            | 0             |
| seq1243 | Fusobacteria    | Fusobacteriia   | 0            | 0             | 0            | 0             |
| seq1442 | Fusobacteria    | Fusobacteriia   | 0            | 0             | 0            | 0             |
|         | Fusobacteria    | <b>TOTAL</b>    | 0            | 0             | 0            | 0             |
|         |                 |                 |              |               |              |               |
| seq490  | Lentisphaerae   | Lentisphaeria   | 0            | 0             | 0            | 0             |
| seq617  | Lentisphaerae   | Lentisphaeria   | 0            | 0             | 40           | 22            |
| seq700  | Lentisphaerae   | Lentisphaeria   | 0            | 0             | 103          | 61            |
| seq966  | Lentisphaerae   | Lentisphaeria   | 0            | 0             | 0            | 0             |
| seq1387 | Lentisphaerae   | Lentisphaeria   | 0            | 0             | 0            | 0             |
| seq845  | Lentisphaerae   | Lentisphaeria   | 0            | 0             | 0            | 0             |
|         | Lentisphaerae   | <b>TOTAL</b>    | 0            | 0             | 143          | 83            |
|         |                 |                 |              |               |              |               |
| seq1349 | Patescibacteria | Saccharimonadia | 0            | 0             | 0            | 6             |
| seq1744 | Patescibacteria | Saccharimonadia | 0            | 0             | 0            | 0             |
| seq1851 | Patescibacteria | Saccharimonadia | 0            | 0             | 0            | 0             |
| seq1884 | Patescibacteria | Saccharimonadia | 0            | 0             | 0            | 0             |
|         | Patescibacteria | <b>TOTAL</b>    | 0            | 0             | 0            | 6             |

Sequence Count Table

|         | Phylum          | Class           | Subject27WK0 | Subject27WK12 | Subject15WK0 | Subject15WK12 |
|---------|-----------------|-----------------|--------------|---------------|--------------|---------------|
| seq1849 | Firmicutes      | Clostridia      | 0            | 0             | 0            | 0             |
| seq1862 | Firmicutes      | Clostridia      | 0            | 0             | 0            | 0             |
| seq1863 | Firmicutes      | Clostridia      | 0            | 0             | 0            | 0             |
| seq1864 | Firmicutes      | Clostridia      | 0            | 0             | 0            | 0             |
| seq1865 | Firmicutes      | Clostridia      | 0            | 0             | 0            | 0             |
| seq1881 | Firmicutes      | Clostridia      | 0            | 0             | 0            | 0             |
| seq1888 | Firmicutes      |                 | 0            | 0             | 0            | 0             |
| seq1889 | Firmicutes      | Clostridia      | 0            | 0             | 0            | 0             |
| seq1893 | Firmicutes      | Clostridia      | 0            | 0             | 0            | 0             |
| seq1898 | Firmicutes      |                 | 0            | 0             | 0            | 0             |
| seq1902 | Firmicutes      | Clostridia      | 0            | 0             | 0            | 0             |
|         | Firmicutes      | <b>TOTAL</b>    | 90690        | 93608         | 67080        | 75473         |
|         |                 |                 |              |               |              |               |
| seq169  | Fusobacteria    | Fusobacteriia   | 0            | 0             | 1229         | 5710          |
| seq1895 | Fusobacteria    | Fusobacteriia   | 0            | 0             | 0            | 3             |
| seq1243 | Fusobacteria    | Fusobacteriia   | 0            | 0             | 0            | 0             |
| seq1442 | Fusobacteria    | Fusobacteriia   | 0            | 0             | 0            | 0             |
|         | Fusobacteria    | <b>TOTAL</b>    | 0            | 0             | 1229         | 5713          |
|         |                 |                 |              |               |              |               |
| seq490  | Lentisphaerae   | Lentisphaeria   | 0            | 0             | 0            | 0             |
| seq617  | Lentisphaerae   | Lentisphaeria   | 0            | 0             | 0            | 0             |
| seq700  | Lentisphaerae   | Lentisphaeria   | 0            | 0             | 0            | 0             |
| seq966  | Lentisphaerae   | Lentisphaeria   | 0            | 0             | 0            | 0             |
| seq1387 | Lentisphaerae   | Lentisphaeria   | 0            | 0             | 0            | 0             |
| seq845  | Lentisphaerae   | Lentisphaeria   | 0            | 0             | 0            | 0             |
|         | Lentisphaerae   | <b>TOTAL</b>    | 0            | 0             | 0            | 0             |
|         |                 |                 |              |               |              |               |
| seq1349 | Patescibacteria | Saccharimonadia | 0            | 0             | 0            | 0             |
| seq1744 | Patescibacteria | Saccharimonadia | 0            | 0             | 0            | 0             |
| seq1851 | Patescibacteria | Saccharimonadia | 0            | 0             | 0            | 0             |
| seq1884 | Patescibacteria | Saccharimonadia | 0            | 0             | 0            | 0             |
|         | Patescibacteria | <b>TOTAL</b>    | 0            | 0             | 0            | 0             |

Sequence Count Table

|                | <b>Phylum</b>          | <b>Class</b>    | <b>Δ</b> |  |  |  |
|----------------|------------------------|-----------------|----------|--|--|--|
| <b>seq1849</b> | Firmicutes             | Clostridia      |          |  |  |  |
| <b>seq1862</b> | Firmicutes             | Clostridia      |          |  |  |  |
| <b>seq1863</b> | Firmicutes             | Clostridia      |          |  |  |  |
| <b>seq1864</b> | Firmicutes             | Clostridia      |          |  |  |  |
| <b>seq1865</b> | Firmicutes             | Clostridia      |          |  |  |  |
| <b>seq1881</b> | Firmicutes             | Clostridia      |          |  |  |  |
| <b>seq1888</b> | Firmicutes             |                 |          |  |  |  |
| <b>seq1889</b> | Firmicutes             | Clostridia      |          |  |  |  |
| <b>seq1893</b> | Firmicutes             | Clostridia      |          |  |  |  |
| <b>seq1898</b> | Firmicutes             |                 |          |  |  |  |
| <b>seq1902</b> | Firmicutes             | Clostridia      |          |  |  |  |
|                | <b>Firmicutes</b>      | <b>TOTAL</b>    |          |  |  |  |
|                |                        |                 |          |  |  |  |
| <b>seq169</b>  | Fusobacteria           | Fusobacteriia   |          |  |  |  |
| <b>seq1895</b> | Fusobacteria           | Fusobacteriia   |          |  |  |  |
| <b>seq1243</b> | Fusobacteria           | Fusobacteriia   |          |  |  |  |
| <b>seq1442</b> | Fusobacteria           | Fusobacteriia   |          |  |  |  |
|                | <b>Fusobacteria</b>    | <b>TOTAL</b>    |          |  |  |  |
|                |                        |                 |          |  |  |  |
| <b>seq490</b>  | Lentisphaerae          | Lentisphaeria   |          |  |  |  |
| <b>seq617</b>  | Lentisphaerae          | Lentisphaeria   |          |  |  |  |
| <b>seq700</b>  | Lentisphaerae          | Lentisphaeria   |          |  |  |  |
| <b>seq966</b>  | Lentisphaerae          | Lentisphaeria   |          |  |  |  |
| <b>seq1387</b> | Lentisphaerae          | Lentisphaeria   |          |  |  |  |
| <b>seq845</b>  | Lentisphaerae          | Lentisphaeria   |          |  |  |  |
|                | <b>Lentisphaerae</b>   | <b>TOTAL</b>    |          |  |  |  |
|                |                        |                 |          |  |  |  |
| <b>seq1349</b> | Patescibacteria        | Saccharimonadia |          |  |  |  |
| <b>seq1744</b> | Patescibacteria        | Saccharimonadia |          |  |  |  |
| <b>seq1851</b> | Patescibacteria        | Saccharimonadia |          |  |  |  |
| <b>seq1884</b> | Patescibacteria        | Saccharimonadia |          |  |  |  |
|                | <b>Patescibacteria</b> | <b>TOTAL</b>    |          |  |  |  |

Sequence Count Table

|                | <b>Phylum</b>  | <b>Class</b>        | <b>Order</b>          | <b>Family</b>       |
|----------------|----------------|---------------------|-----------------------|---------------------|
| <b>seq1856</b> | Proteobacteria | Gammaproteobacteria | Betaproteobacteriales | Burkholderiaceae    |
| <b>seq1162</b> | Proteobacteria | Gammaproteobacteria | Betaproteobacteriales | Burkholderiaceae    |
| <b>seq41</b>   | Proteobacteria | Gammaproteobacteria | Betaproteobacteriales | Burkholderiaceae    |
| <b>seq561</b>  | Proteobacteria | Gammaproteobacteria | Betaproteobacteriales | Burkholderiaceae    |
| <b>seq814</b>  | Proteobacteria | Gammaproteobacteria | Betaproteobacteriales | Burkholderiaceae    |
| <b>seq979</b>  | Proteobacteria | Gammaproteobacteria | Betaproteobacteriales | Burkholderiaceae    |
| <b>seq97</b>   | Proteobacteria | Gammaproteobacteria | Betaproteobacteriales | Burkholderiaceae    |
| <b>seq116</b>  | Proteobacteria | Gammaproteobacteria | Betaproteobacteriales | Burkholderiaceae    |
| <b>seq151</b>  | Proteobacteria | Gammaproteobacteria | Betaproteobacteriales | Burkholderiaceae    |
| <b>seq168</b>  | Proteobacteria | Gammaproteobacteria | Betaproteobacteriales | Burkholderiaceae    |
| <b>seq295</b>  | Proteobacteria | Gammaproteobacteria | Betaproteobacteriales | Burkholderiaceae    |
| <b>seq296</b>  | Proteobacteria | Gammaproteobacteria | Betaproteobacteriales | Burkholderiaceae    |
| <b>seq334</b>  | Proteobacteria | Gammaproteobacteria | Betaproteobacteriales | Burkholderiaceae    |
| <b>seq389</b>  | Proteobacteria | Gammaproteobacteria | Betaproteobacteriales | Burkholderiaceae    |
| <b>seq431</b>  | Proteobacteria | Gammaproteobacteria | Betaproteobacteriales | Burkholderiaceae    |
| <b>seq482</b>  | Proteobacteria | Gammaproteobacteria | Betaproteobacteriales | Burkholderiaceae    |
| <b>seq622</b>  | Proteobacteria | Gammaproteobacteria | Betaproteobacteriales | Burkholderiaceae    |
| <b>seq993</b>  | Proteobacteria | Gammaproteobacteria | Betaproteobacteriales | Burkholderiaceae    |
| <b>seq1275</b> | Proteobacteria | Gammaproteobacteria | Betaproteobacteriales | Burkholderiaceae    |
| <b>seq1684</b> | Proteobacteria | Gammaproteobacteria | Betaproteobacteriales | Burkholderiaceae    |
| <b>seq1794</b> | Proteobacteria | Gammaproteobacteria | Betaproteobacteriales | Burkholderiaceae    |
| <b>seq460</b>  | Proteobacteria | Gammaproteobacteria | Betaproteobacteriales | Burkholderiaceae    |
| <b>seq841</b>  | Proteobacteria | Gammaproteobacteria | Betaproteobacteriales | Burkholderiaceae    |
| <b>seq1188</b> | Proteobacteria | Gammaproteobacteria | Betaproteobacteriales | Burkholderiaceae    |
| <b>seq1435</b> | Proteobacteria | Gammaproteobacteria | Betaproteobacteriales | Burkholderiaceae    |
| <b>seq1583</b> | Proteobacteria | Gammaproteobacteria | Betaproteobacteriales | Burkholderiaceae    |
| <b>seq126</b>  | Proteobacteria | Deltaproteobacteria | Desulfovibrionales    | Desulfovibrionaceae |
| <b>seq279</b>  | Proteobacteria | Deltaproteobacteria | Desulfovibrionales    | Desulfovibrionaceae |
| <b>seq118</b>  | Proteobacteria | Deltaproteobacteria | Desulfovibrionales    | Desulfovibrionaceae |
| <b>seq269</b>  | Proteobacteria | Deltaproteobacteria | Desulfovibrionales    | Desulfovibrionaceae |
| <b>seq889</b>  | Proteobacteria | Deltaproteobacteria | Desulfovibrionales    | Desulfovibrionaceae |

Sequence Count Table

|         | Phylum         | Class               | Genus                                      | Species           |
|---------|----------------|---------------------|--------------------------------------------|-------------------|
| seq1856 | Proteobacteria | Gammaproteobacteria | Burkholderia-Caballeronia-Paraburkholderia |                   |
| seq1162 | Proteobacteria | Gammaproteobacteria | Oxalobacter                                | formigenes        |
| seq41   | Proteobacteria | Gammaproteobacteria | Parasutterella                             | excrementihominis |
| seq561  | Proteobacteria | Gammaproteobacteria | Parasutterella                             |                   |
| seq814  | Proteobacteria | Gammaproteobacteria | Parasutterella                             |                   |
| seq979  | Proteobacteria | Gammaproteobacteria | Parasutterella                             |                   |
| seq97   | Proteobacteria | Gammaproteobacteria | Sutterella                                 | wadsworthensis    |
| seq116  | Proteobacteria | Gammaproteobacteria | Sutterella                                 |                   |
| seq151  | Proteobacteria | Gammaproteobacteria | Sutterella                                 |                   |
| seq168  | Proteobacteria | Gammaproteobacteria | Sutterella                                 |                   |
| seq295  | Proteobacteria | Gammaproteobacteria | Sutterella                                 | wadsworthensis    |
| seq296  | Proteobacteria | Gammaproteobacteria | Sutterella                                 |                   |
| seq334  | Proteobacteria | Gammaproteobacteria | Sutterella                                 |                   |
| seq389  | Proteobacteria | Gammaproteobacteria | Sutterella                                 | wadsworthensis    |
| seq431  | Proteobacteria | Gammaproteobacteria | Sutterella                                 |                   |
| seq482  | Proteobacteria | Gammaproteobacteria | Sutterella                                 |                   |
| seq622  | Proteobacteria | Gammaproteobacteria | Sutterella                                 |                   |
| seq993  | Proteobacteria | Gammaproteobacteria | Sutterella                                 |                   |
| seq1275 | Proteobacteria | Gammaproteobacteria | Sutterella                                 |                   |
| seq1684 | Proteobacteria | Gammaproteobacteria | Sutterella                                 |                   |
| seq1794 | Proteobacteria | Gammaproteobacteria | Sutterella                                 |                   |
| seq460  | Proteobacteria | Gammaproteobacteria |                                            |                   |
| seq841  | Proteobacteria | Gammaproteobacteria |                                            |                   |
| seq1188 | Proteobacteria | Gammaproteobacteria |                                            |                   |
| seq1435 | Proteobacteria | Gammaproteobacteria |                                            |                   |
| seq1583 | Proteobacteria | Gammaproteobacteria |                                            |                   |
| seq126  | Proteobacteria | Deltaproteobacteria | Bilophila                                  | wadsworthia       |
| seq279  | Proteobacteria | Deltaproteobacteria | Bilophila                                  |                   |
| seq118  | Proteobacteria | Deltaproteobacteria | Desulfovibrio                              |                   |
| seq269  | Proteobacteria | Deltaproteobacteria | Desulfovibrio                              |                   |
| seq889  | Proteobacteria | Deltaproteobacteria | Desulfovibrio                              |                   |

Sequence Count Table

|                | <b>Phylum</b>  | <b>Class</b>        | <b>Subject34WK0</b> | <b>Subject34WK12</b> | <b>Subject16WK0</b> | <b>Subject16WK12</b> |
|----------------|----------------|---------------------|---------------------|----------------------|---------------------|----------------------|
| <b>seq1856</b> | Proteobacteria | Gammaproteobacteria | 0                   | 0                    | 0                   | 0                    |
| <b>seq1162</b> | Proteobacteria | Gammaproteobacteria | 0                   | 0                    | 0                   | 0                    |
| <b>seq41</b>   | Proteobacteria | Gammaproteobacteria | 412                 | 823                  | 32                  | 33                   |
| <b>seq561</b>  | Proteobacteria | Gammaproteobacteria | 0                   | 0                    | 0                   | 0                    |
| <b>seq814</b>  | Proteobacteria | Gammaproteobacteria | 0                   | 0                    | 0                   | 0                    |
| <b>seq979</b>  | Proteobacteria | Gammaproteobacteria | 0                   | 0                    | 0                   | 0                    |
| <b>seq97</b>   | Proteobacteria | Gammaproteobacteria | 0                   | 0                    | 0                   | 51                   |
| <b>seq116</b>  | Proteobacteria | Gammaproteobacteria | 0                   | 0                    | 4060                | 1565                 |
| <b>seq151</b>  | Proteobacteria | Gammaproteobacteria | 0                   | 0                    | 0                   | 0                    |
| <b>seq168</b>  | Proteobacteria | Gammaproteobacteria | 0                   | 0                    | 0                   | 0                    |
| <b>seq295</b>  | Proteobacteria | Gammaproteobacteria | 0                   | 0                    | 0                   | 0                    |
| <b>seq296</b>  | Proteobacteria | Gammaproteobacteria | 0                   | 0                    | 0                   | 0                    |
| <b>seq334</b>  | Proteobacteria | Gammaproteobacteria | 0                   | 0                    | 0                   | 0                    |
| <b>seq389</b>  | Proteobacteria | Gammaproteobacteria | 0                   | 0                    | 0                   | 0                    |
| <b>seq431</b>  | Proteobacteria | Gammaproteobacteria | 0                   | 0                    | 0                   | 0                    |
| <b>seq482</b>  | Proteobacteria | Gammaproteobacteria | 0                   | 0                    | 0                   | 0                    |
| <b>seq622</b>  | Proteobacteria | Gammaproteobacteria | 0                   | 0                    | 0                   | 0                    |
| <b>seq993</b>  | Proteobacteria | Gammaproteobacteria | 0                   | 0                    | 0                   | 0                    |
| <b>seq1275</b> | Proteobacteria | Gammaproteobacteria | 0                   | 0                    | 0                   | 0                    |
| <b>seq1684</b> | Proteobacteria | Gammaproteobacteria | 0                   | 0                    | 0                   | 0                    |
| <b>seq1794</b> | Proteobacteria | Gammaproteobacteria | 0                   | 0                    | 0                   | 0                    |
| <b>seq460</b>  | Proteobacteria | Gammaproteobacteria | 0                   | 0                    | 0                   | 0                    |
| <b>seq841</b>  | Proteobacteria | Gammaproteobacteria | 0                   | 0                    | 0                   | 0                    |
| <b>seq1188</b> | Proteobacteria | Gammaproteobacteria | 0                   | 0                    | 0                   | 0                    |
| <b>seq1435</b> | Proteobacteria | Gammaproteobacteria | 4                   | 13                   | 0                   | 0                    |
| <b>seq1583</b> | Proteobacteria | Gammaproteobacteria | 0                   | 0                    | 0                   | 0                    |
| <b>seq126</b>  | Proteobacteria | Deltaproteobacteria | 63                  | 211                  | 99                  | 260                  |
| <b>seq279</b>  | Proteobacteria | Deltaproteobacteria | 0                   | 0                    | 0                   | 0                    |
| <b>seq118</b>  | Proteobacteria | Deltaproteobacteria | 32                  | 296                  | 0                   | 0                    |
| <b>seq269</b>  | Proteobacteria | Deltaproteobacteria | 75                  | 754                  | 304                 | 607                  |
| <b>seq889</b>  | Proteobacteria | Deltaproteobacteria | 0                   | 0                    | 0                   | 0                    |

Sequence Count Table

|                | <b>Phylum</b>  | <b>Class</b>        | <b>Subject17WK0</b> | <b>Subject17WK12</b> | <b>Subject1WK0</b> | <b>Subject1WK12</b> |
|----------------|----------------|---------------------|---------------------|----------------------|--------------------|---------------------|
| <b>seq1856</b> | Proteobacteria | Gammaproteobacteria | 0                   | 0                    | 0                  | 0                   |
| <b>seq1162</b> | Proteobacteria | Gammaproteobacteria | 0                   | 0                    | 0                  | 0                   |
| <b>seq41</b>   | Proteobacteria | Gammaproteobacteria | 269                 | 439                  | 6731               | 7868                |
| <b>seq561</b>  | Proteobacteria | Gammaproteobacteria | 0                   | 0                    | 0                  | 0                   |
| <b>seq814</b>  | Proteobacteria | Gammaproteobacteria | 0                   | 0                    | 0                  | 0                   |
| <b>seq979</b>  | Proteobacteria | Gammaproteobacteria | 0                   | 0                    | 0                  | 0                   |
| <b>seq97</b>   | Proteobacteria | Gammaproteobacteria | 0                   | 0                    | 0                  | 0                   |
| <b>seq116</b>  | Proteobacteria | Gammaproteobacteria | 0                   | 0                    | 0                  | 0                   |
| <b>seq151</b>  | Proteobacteria | Gammaproteobacteria | 0                   | 0                    | 0                  | 0                   |
| <b>seq168</b>  | Proteobacteria | Gammaproteobacteria | 0                   | 0                    | 0                  | 0                   |
| <b>seq295</b>  | Proteobacteria | Gammaproteobacteria | 0                   | 0                    | 0                  | 0                   |
| <b>seq296</b>  | Proteobacteria | Gammaproteobacteria | 0                   | 0                    | 0                  | 0                   |
| <b>seq334</b>  | Proteobacteria | Gammaproteobacteria | 0                   | 0                    | 0                  | 0                   |
| <b>seq389</b>  | Proteobacteria | Gammaproteobacteria | 0                   | 0                    | 0                  | 0                   |
| <b>seq431</b>  | Proteobacteria | Gammaproteobacteria | 0                   | 0                    | 0                  | 0                   |
| <b>seq482</b>  | Proteobacteria | Gammaproteobacteria | 0                   | 0                    | 0                  | 0                   |
| <b>seq622</b>  | Proteobacteria | Gammaproteobacteria | 0                   | 0                    | 0                  | 0                   |
| <b>seq993</b>  | Proteobacteria | Gammaproteobacteria | 0                   | 0                    | 0                  | 0                   |
| <b>seq1275</b> | Proteobacteria | Gammaproteobacteria | 0                   | 0                    | 0                  | 0                   |
| <b>seq1684</b> | Proteobacteria | Gammaproteobacteria | 0                   | 0                    | 0                  | 0                   |
| <b>seq1794</b> | Proteobacteria | Gammaproteobacteria | 0                   | 0                    | 0                  | 0                   |
| <b>seq460</b>  | Proteobacteria | Gammaproteobacteria | 0                   | 0                    | 0                  | 0                   |
| <b>seq841</b>  | Proteobacteria | Gammaproteobacteria | 118                 | 9                    | 0                  | 0                   |
| <b>seq1188</b> | Proteobacteria | Gammaproteobacteria | 0                   | 0                    | 18                 | 18                  |
| <b>seq1435</b> | Proteobacteria | Gammaproteobacteria | 0                   | 0                    | 0                  | 0                   |
| <b>seq1583</b> | Proteobacteria | Gammaproteobacteria | 0                   | 0                    | 0                  | 0                   |
| <b>seq126</b>  | Proteobacteria | Deltaproteobacteria | 350                 | 511                  | 159                | 174                 |
| <b>seq279</b>  | Proteobacteria | Deltaproteobacteria | 0                   | 0                    | 627                | 794                 |
| <b>seq118</b>  | Proteobacteria | Deltaproteobacteria | 0                   | 0                    | 0                  | 0                   |
| <b>seq269</b>  | Proteobacteria | Deltaproteobacteria | 0                   | 0                    | 0                  | 0                   |
| <b>seq889</b>  | Proteobacteria | Deltaproteobacteria | 0                   | 0                    | 0                  | 0                   |



Sequence Count Table

|         | Phylum         | Class               | Subject2WK0 | Subject2WK12 | Subject3WK0 | Subject3WK12 |
|---------|----------------|---------------------|-------------|--------------|-------------|--------------|
| seq1856 | Proteobacteria | Gammaproteobacteria | 0           | 0            | 0           | 0            |
| seq1162 | Proteobacteria | Gammaproteobacteria | 0           | 0            | 0           | 0            |
| seq41   | Proteobacteria | Gammaproteobacteria | 1134        | 2183         | 0           | 0            |
| seq561  | Proteobacteria | Gammaproteobacteria | 0           | 0            | 0           | 0            |
| seq814  | Proteobacteria | Gammaproteobacteria | 0           | 0            | 0           | 0            |
| seq979  | Proteobacteria | Gammaproteobacteria | 0           | 0            | 0           | 0            |
| seq97   | Proteobacteria | Gammaproteobacteria | 0           | 0            | 0           | 0            |
| seq116  | Proteobacteria | Gammaproteobacteria | 0           | 0            | 0           | 0            |
| seq151  | Proteobacteria | Gammaproteobacteria | 0           | 0            | 0           | 0            |
| seq168  | Proteobacteria | Gammaproteobacteria | 0           | 0            | 0           | 0            |
| seq295  | Proteobacteria | Gammaproteobacteria | 0           | 0            | 0           | 0            |
| seq296  | Proteobacteria | Gammaproteobacteria | 0           | 0            | 0           | 0            |
| seq334  | Proteobacteria | Gammaproteobacteria | 0           | 0            | 0           | 0            |
| seq389  | Proteobacteria | Gammaproteobacteria | 0           | 0            | 0           | 0            |
| seq431  | Proteobacteria | Gammaproteobacteria | 0           | 0            | 0           | 0            |
| seq482  | Proteobacteria | Gammaproteobacteria | 0           | 0            | 0           | 0            |
| seq622  | Proteobacteria | Gammaproteobacteria | 0           | 0            | 0           | 0            |
| seq993  | Proteobacteria | Gammaproteobacteria | 0           | 0            | 0           | 0            |
| seq1275 | Proteobacteria | Gammaproteobacteria | 0           | 0            | 0           | 0            |
| seq1684 | Proteobacteria | Gammaproteobacteria | 0           | 0            | 0           | 0            |
| seq1794 | Proteobacteria | Gammaproteobacteria | 0           | 0            | 0           | 0            |
| seq460  | Proteobacteria | Gammaproteobacteria | 0           | 0            | 0           | 0            |
| seq841  | Proteobacteria | Gammaproteobacteria | 0           | 0            | 0           | 0            |
| seq1188 | Proteobacteria | Gammaproteobacteria | 0           | 0            | 0           | 0            |
| seq1435 | Proteobacteria | Gammaproteobacteria | 0           | 0            | 0           | 0            |
| seq1583 | Proteobacteria | Gammaproteobacteria | 0           | 0            | 0           | 0            |
| seq126  | Proteobacteria | Deltaproteobacteria | 0           | 0            | 398         | 327          |
| seq279  | Proteobacteria | Deltaproteobacteria | 0           | 0            | 0           | 0            |
| seq118  | Proteobacteria | Deltaproteobacteria | 720         | 138          | 0           | 0            |
| seq269  | Proteobacteria | Deltaproteobacteria | 0           | 0            | 0           | 0            |
| seq889  | Proteobacteria | Deltaproteobacteria | 0           | 0            | 0           | 0            |

Sequence Count Table

|         | Phylum         | Class               | Subject4WK0 | Subject4WK12 | Subject5WK0 | Subject5WK12 |
|---------|----------------|---------------------|-------------|--------------|-------------|--------------|
| seq1856 | Proteobacteria | Gammaproteobacteria | 0           | 0            | 0           | 0            |
| seq1162 | Proteobacteria | Gammaproteobacteria | 0           | 0            | 0           | 0            |
| seq41   | Proteobacteria | Gammaproteobacteria | 0           | 0            | 1687        | 1564         |
| seq561  | Proteobacteria | Gammaproteobacteria | 0           | 0            | 0           | 0            |
| seq814  | Proteobacteria | Gammaproteobacteria | 0           | 0            | 0           | 0            |
| seq979  | Proteobacteria | Gammaproteobacteria | 0           | 0            | 0           | 0            |
| seq97   | Proteobacteria | Gammaproteobacteria | 0           | 0            | 0           | 0            |
| seq116  | Proteobacteria | Gammaproteobacteria | 0           | 0            | 0           | 0            |
| seq151  | Proteobacteria | Gammaproteobacteria | 0           | 0            | 0           | 0            |
| seq168  | Proteobacteria | Gammaproteobacteria | 0           | 0            | 0           | 0            |
| seq295  | Proteobacteria | Gammaproteobacteria | 0           | 0            | 0           | 0            |
| seq296  | Proteobacteria | Gammaproteobacteria | 451         | 1806         | 0           | 0            |
| seq334  | Proteobacteria | Gammaproteobacteria | 0           | 0            | 0           | 0            |
| seq389  | Proteobacteria | Gammaproteobacteria | 0           | 0            | 0           | 0            |
| seq431  | Proteobacteria | Gammaproteobacteria | 0           | 0            | 0           | 0            |
| seq482  | Proteobacteria | Gammaproteobacteria | 0           | 0            | 0           | 0            |
| seq622  | Proteobacteria | Gammaproteobacteria | 0           | 0            | 0           | 0            |
| seq993  | Proteobacteria | Gammaproteobacteria | 0           | 0            | 0           | 0            |
| seq1275 | Proteobacteria | Gammaproteobacteria | 0           | 0            | 0           | 0            |
| seq1684 | Proteobacteria | Gammaproteobacteria | 0           | 0            | 0           | 0            |
| seq1794 | Proteobacteria | Gammaproteobacteria | 0           | 0            | 0           | 0            |
| seq460  | Proteobacteria | Gammaproteobacteria | 0           | 0            | 0           | 0            |
| seq841  | Proteobacteria | Gammaproteobacteria | 0           | 0            | 0           | 0            |
| seq1188 | Proteobacteria | Gammaproteobacteria | 11          | 23           | 0           | 0            |
| seq1435 | Proteobacteria | Gammaproteobacteria | 0           | 0            | 0           | 0            |
| seq1583 | Proteobacteria | Gammaproteobacteria | 0           | 0            | 0           | 0            |
| seq126  | Proteobacteria | Deltaproteobacteria | 0           | 0            | 394         | 239          |
| seq279  | Proteobacteria | Deltaproteobacteria | 0           | 0            | 0           | 0            |
| seq118  | Proteobacteria | Deltaproteobacteria | 0           | 0            | 0           | 0            |
| seq269  | Proteobacteria | Deltaproteobacteria | 0           | 0            | 0           | 0            |
| seq889  | Proteobacteria | Deltaproteobacteria | 0           | 0            | 0           | 0            |

Sequence Count Table

|                | <b>Phylum</b>  | <b>Class</b>        | <b>Subject6WK0</b> | <b>Subject6WK12</b> | <b>Subject18WK0</b> | <b>Subject18WK12</b> |
|----------------|----------------|---------------------|--------------------|---------------------|---------------------|----------------------|
| <b>seq1856</b> | Proteobacteria | Gammaproteobacteria | 0                  | 0                   | 0                   | 0                    |
| <b>seq1162</b> | Proteobacteria | Gammaproteobacteria | 0                  | 0                   | 0                   | 0                    |
| <b>seq41</b>   | Proteobacteria | Gammaproteobacteria | 26                 | 51                  | 471                 | 228                  |
| <b>seq561</b>  | Proteobacteria | Gammaproteobacteria | 0                  | 0                   | 0                   | 0                    |
| <b>seq814</b>  | Proteobacteria | Gammaproteobacteria | 0                  | 0                   | 0                   | 0                    |
| <b>seq979</b>  | Proteobacteria | Gammaproteobacteria | 0                  | 0                   | 0                   | 0                    |
| <b>seq97</b>   | Proteobacteria | Gammaproteobacteria | 0                  | 0                   | 0                   | 0                    |
| <b>seq116</b>  | Proteobacteria | Gammaproteobacteria | 473                | 1259                | 0                   | 0                    |
| <b>seq151</b>  | Proteobacteria | Gammaproteobacteria | 0                  | 0                   | 2459                | 1066                 |
| <b>seq168</b>  | Proteobacteria | Gammaproteobacteria | 0                  | 0                   | 0                   | 0                    |
| <b>seq295</b>  | Proteobacteria | Gammaproteobacteria | 0                  | 0                   | 0                   | 0                    |
| <b>seq296</b>  | Proteobacteria | Gammaproteobacteria | 0                  | 0                   | 0                   | 0                    |
| <b>seq334</b>  | Proteobacteria | Gammaproteobacteria | 0                  | 0                   | 0                   | 0                    |
| <b>seq389</b>  | Proteobacteria | Gammaproteobacteria | 0                  | 0                   | 0                   | 0                    |
| <b>seq431</b>  | Proteobacteria | Gammaproteobacteria | 0                  | 0                   | 0                   | 0                    |
| <b>seq482</b>  | Proteobacteria | Gammaproteobacteria | 31                 | 0                   | 0                   | 0                    |
| <b>seq622</b>  | Proteobacteria | Gammaproteobacteria | 0                  | 0                   | 0                   | 0                    |
| <b>seq993</b>  | Proteobacteria | Gammaproteobacteria | 0                  | 0                   | 0                   | 0                    |
| <b>seq1275</b> | Proteobacteria | Gammaproteobacteria | 0                  | 0                   | 0                   | 0                    |
| <b>seq1684</b> | Proteobacteria | Gammaproteobacteria | 0                  | 0                   | 0                   | 0                    |
| <b>seq1794</b> | Proteobacteria | Gammaproteobacteria | 0                  | 0                   | 0                   | 0                    |
| <b>seq460</b>  | Proteobacteria | Gammaproteobacteria | 0                  | 0                   | 0                   | 0                    |
| <b>seq841</b>  | Proteobacteria | Gammaproteobacteria | 0                  | 0                   | 0                   | 0                    |
| <b>seq1188</b> | Proteobacteria | Gammaproteobacteria | 0                  | 0                   | 0                   | 0                    |
| <b>seq1435</b> | Proteobacteria | Gammaproteobacteria | 19                 | 0                   | 0                   | 0                    |
| <b>seq1583</b> | Proteobacteria | Gammaproteobacteria | 0                  | 0                   | 0                   | 0                    |
| <b>seq126</b>  | Proteobacteria | Deltaproteobacteria | 178                | 375                 | 418                 | 259                  |
| <b>seq279</b>  | Proteobacteria | Deltaproteobacteria | 0                  | 0                   | 0                   | 0                    |
| <b>seq118</b>  | Proteobacteria | Deltaproteobacteria | 1023               | 1390                | 1037                | 546                  |
| <b>seq269</b>  | Proteobacteria | Deltaproteobacteria | 0                  | 0                   | 0                   | 0                    |
| <b>seq889</b>  | Proteobacteria | Deltaproteobacteria | 0                  | 0                   | 0                   | 0                    |

Sequence Count Table

|                | <b>Phylum</b>  | <b>Class</b>        | <b>Subject19WK0</b> | <b>Subject19WK12</b> | <b>Subject20WK0</b> | <b>Subject20WK12</b> |
|----------------|----------------|---------------------|---------------------|----------------------|---------------------|----------------------|
| <b>seq1856</b> | Proteobacteria | Gammaproteobacteria | 0                   | 0                    | 0                   | 0                    |
| <b>seq1162</b> | Proteobacteria | Gammaproteobacteria | 0                   | 0                    | 0                   | 0                    |
| <b>seq41</b>   | Proteobacteria | Gammaproteobacteria | 0                   | 0                    | 0                   | 0                    |
| <b>seq561</b>  | Proteobacteria | Gammaproteobacteria | 0                   | 0                    | 0                   | 0                    |
| <b>seq814</b>  | Proteobacteria | Gammaproteobacteria | 0                   | 0                    | 0                   | 0                    |
| <b>seq979</b>  | Proteobacteria | Gammaproteobacteria | 0                   | 0                    | 0                   | 0                    |
| <b>seq97</b>   | Proteobacteria | Gammaproteobacteria | 0                   | 0                    | 0                   | 0                    |
| <b>seq116</b>  | Proteobacteria | Gammaproteobacteria | 0                   | 0                    | 96                  | 304                  |
| <b>seq151</b>  | Proteobacteria | Gammaproteobacteria | 0                   | 0                    | 0                   | 0                    |
| <b>seq168</b>  | Proteobacteria | Gammaproteobacteria | 0                   | 0                    | 0                   | 0                    |
| <b>seq295</b>  | Proteobacteria | Gammaproteobacteria | 0                   | 0                    | 0                   | 146                  |
| <b>seq296</b>  | Proteobacteria | Gammaproteobacteria | 0                   | 0                    | 0                   | 0                    |
| <b>seq334</b>  | Proteobacteria | Gammaproteobacteria | 0                   | 0                    | 0                   | 0                    |
| <b>seq389</b>  | Proteobacteria | Gammaproteobacteria | 0                   | 0                    | 0                   | 0                    |
| <b>seq431</b>  | Proteobacteria | Gammaproteobacteria | 0                   | 0                    | 0                   | 0                    |
| <b>seq482</b>  | Proteobacteria | Gammaproteobacteria | 0                   | 0                    | 337                 | 456                  |
| <b>seq622</b>  | Proteobacteria | Gammaproteobacteria | 0                   | 0                    | 0                   | 0                    |
| <b>seq993</b>  | Proteobacteria | Gammaproteobacteria | 0                   | 0                    | 0                   | 0                    |
| <b>seq1275</b> | Proteobacteria | Gammaproteobacteria | 0                   | 0                    | 0                   | 0                    |
| <b>seq1684</b> | Proteobacteria | Gammaproteobacteria | 0                   | 0                    | 0                   | 0                    |
| <b>seq1794</b> | Proteobacteria | Gammaproteobacteria | 0                   | 0                    | 0                   | 8                    |
| <b>seq460</b>  | Proteobacteria | Gammaproteobacteria | 0                   | 0                    | 0                   | 110                  |
| <b>seq841</b>  | Proteobacteria | Gammaproteobacteria | 0                   | 0                    | 103                 | 0                    |
| <b>seq1188</b> | Proteobacteria | Gammaproteobacteria | 0                   | 0                    | 0                   | 0                    |
| <b>seq1435</b> | Proteobacteria | Gammaproteobacteria | 0                   | 0                    | 0                   | 0                    |
| <b>seq1583</b> | Proteobacteria | Gammaproteobacteria | 0                   | 0                    | 13                  | 8                    |
| <b>seq126</b>  | Proteobacteria | Deltaproteobacteria | 0                   | 0                    | 7                   | 8                    |
| <b>seq279</b>  | Proteobacteria | Deltaproteobacteria | 0                   | 0                    | 0                   | 0                    |
| <b>seq118</b>  | Proteobacteria | Deltaproteobacteria | 0                   | 0                    | 0                   | 0                    |
| <b>seq269</b>  | Proteobacteria | Deltaproteobacteria | 0                   | 0                    | 511                 | 564                  |
| <b>seq889</b>  | Proteobacteria | Deltaproteobacteria | 0                   | 0                    | 0                   | 0                    |

Sequence Count Table

|                | <b>Phylum</b>  | <b>Class</b>        | <b>Subject7WK0</b> | <b>Subject7WK12</b> | <b>Subject21WK0</b> | <b>Subject21WK12</b> |
|----------------|----------------|---------------------|--------------------|---------------------|---------------------|----------------------|
| <b>seq1856</b> | Proteobacteria | Gammaproteobacteria | 0                  | 0                   | 0                   | 0                    |
| <b>seq1162</b> | Proteobacteria | Gammaproteobacteria | 0                  | 0                   | 0                   | 0                    |
| <b>seq41</b>   | Proteobacteria | Gammaproteobacteria | 204                | 1080                | 0                   | 0                    |
| <b>seq561</b>  | Proteobacteria | Gammaproteobacteria | 0                  | 0                   | 0                   | 0                    |
| <b>seq814</b>  | Proteobacteria | Gammaproteobacteria | 0                  | 0                   | 0                   | 0                    |
| <b>seq979</b>  | Proteobacteria | Gammaproteobacteria | 0                  | 0                   | 0                   | 0                    |
| <b>seq97</b>   | Proteobacteria | Gammaproteobacteria | 619                | 2071                | 0                   | 0                    |
| <b>seq116</b>  | Proteobacteria | Gammaproteobacteria | 0                  | 0                   | 0                   | 0                    |
| <b>seq151</b>  | Proteobacteria | Gammaproteobacteria | 0                  | 0                   | 0                   | 0                    |
| <b>seq168</b>  | Proteobacteria | Gammaproteobacteria | 0                  | 0                   | 2575                | 3138                 |
| <b>seq295</b>  | Proteobacteria | Gammaproteobacteria | 0                  | 0                   | 0                   | 0                    |
| <b>seq296</b>  | Proteobacteria | Gammaproteobacteria | 0                  | 0                   | 0                   | 0                    |
| <b>seq334</b>  | Proteobacteria | Gammaproteobacteria | 0                  | 0                   | 0                   | 0                    |
| <b>seq389</b>  | Proteobacteria | Gammaproteobacteria | 0                  | 0                   | 0                   | 0                    |
| <b>seq431</b>  | Proteobacteria | Gammaproteobacteria | 0                  | 0                   | 0                   | 0                    |
| <b>seq482</b>  | Proteobacteria | Gammaproteobacteria | 0                  | 0                   | 0                   | 0                    |
| <b>seq622</b>  | Proteobacteria | Gammaproteobacteria | 0                  | 0                   | 0                   | 0                    |
| <b>seq993</b>  | Proteobacteria | Gammaproteobacteria | 0                  | 0                   | 0                   | 0                    |
| <b>seq1275</b> | Proteobacteria | Gammaproteobacteria | 0                  | 0                   | 0                   | 0                    |
| <b>seq1684</b> | Proteobacteria | Gammaproteobacteria | 0                  | 0                   | 0                   | 0                    |
| <b>seq1794</b> | Proteobacteria | Gammaproteobacteria | 0                  | 0                   | 0                   | 0                    |
| <b>seq460</b>  | Proteobacteria | Gammaproteobacteria | 0                  | 0                   | 0                   | 0                    |
| <b>seq841</b>  | Proteobacteria | Gammaproteobacteria | 0                  | 0                   | 0                   | 0                    |
| <b>seq1188</b> | Proteobacteria | Gammaproteobacteria | 0                  | 0                   | 0                   | 0                    |
| <b>seq1435</b> | Proteobacteria | Gammaproteobacteria | 0                  | 0                   | 0                   | 0                    |
| <b>seq1583</b> | Proteobacteria | Gammaproteobacteria | 0                  | 0                   | 0                   | 0                    |
| <b>seq126</b>  | Proteobacteria | Deltaproteobacteria | 350                | 835                 | 0                   | 0                    |
| <b>seq279</b>  | Proteobacteria | Deltaproteobacteria | 0                  | 0                   | 0                   | 0                    |
| <b>seq118</b>  | Proteobacteria | Deltaproteobacteria | 0                  | 0                   | 0                   | 0                    |
| <b>seq269</b>  | Proteobacteria | Deltaproteobacteria | 0                  | 0                   | 0                   | 0                    |
| <b>seq889</b>  | Proteobacteria | Deltaproteobacteria | 0                  | 0                   | 0                   | 0                    |

Sequence Count Table

|         | Phylum         | Class               | Subject8WK0 | Subject8WK12 | Subject9WK0 | Subject9WK12 |
|---------|----------------|---------------------|-------------|--------------|-------------|--------------|
| seq1856 | Proteobacteria | Gammaproteobacteria | 0           | 0            | 0           | 0            |
| seq1162 | Proteobacteria | Gammaproteobacteria | 30          | 0            | 0           | 0            |
| seq41   | Proteobacteria | Gammaproteobacteria | 1794        | 1245         | 0           | 0            |
| seq561  | Proteobacteria | Gammaproteobacteria | 0           | 0            | 0           | 0            |
| seq814  | Proteobacteria | Gammaproteobacteria | 0           | 0            | 0           | 0            |
| seq979  | Proteobacteria | Gammaproteobacteria | 0           | 0            | 0           | 0            |
| seq97   | Proteobacteria | Gammaproteobacteria | 0           | 0            | 912         | 4816         |
| seq116  | Proteobacteria | Gammaproteobacteria | 0           | 0            | 0           | 0            |
| seq151  | Proteobacteria | Gammaproteobacteria | 0           | 0            | 0           | 0            |
| seq168  | Proteobacteria | Gammaproteobacteria | 0           | 0            | 0           | 0            |
| seq295  | Proteobacteria | Gammaproteobacteria | 0           | 0            | 0           | 0            |
| seq296  | Proteobacteria | Gammaproteobacteria | 0           | 0            | 0           | 0            |
| seq334  | Proteobacteria | Gammaproteobacteria | 0           | 0            | 0           | 0            |
| seq389  | Proteobacteria | Gammaproteobacteria | 0           | 0            | 0           | 0            |
| seq431  | Proteobacteria | Gammaproteobacteria | 0           | 0            | 0           | 0            |
| seq482  | Proteobacteria | Gammaproteobacteria | 0           | 0            | 0           | 0            |
| seq622  | Proteobacteria | Gammaproteobacteria | 0           | 0            | 0           | 0            |
| seq993  | Proteobacteria | Gammaproteobacteria | 0           | 0            | 0           | 0            |
| seq1275 | Proteobacteria | Gammaproteobacteria | 0           | 0            | 0           | 0            |
| seq1684 | Proteobacteria | Gammaproteobacteria | 0           | 0            | 0           | 0            |
| seq1794 | Proteobacteria | Gammaproteobacteria | 0           | 0            | 0           | 0            |
| seq460  | Proteobacteria | Gammaproteobacteria | 0           | 0            | 0           | 0            |
| seq841  | Proteobacteria | Gammaproteobacteria | 0           | 0            | 0           | 0            |
| seq1188 | Proteobacteria | Gammaproteobacteria | 0           | 0            | 0           | 0            |
| seq1435 | Proteobacteria | Gammaproteobacteria | 0           | 0            | 0           | 0            |
| seq1583 | Proteobacteria | Gammaproteobacteria | 0           | 0            | 0           | 0            |
| seq126  | Proteobacteria | Deltaproteobacteria | 185         | 445          | 244         | 376          |
| seq279  | Proteobacteria | Deltaproteobacteria | 0           | 0            | 0           | 0            |
| seq118  | Proteobacteria | Deltaproteobacteria | 1606        | 1000         | 0           | 0            |
| seq269  | Proteobacteria | Deltaproteobacteria | 0           | 0            | 0           | 0            |
| seq889  | Proteobacteria | Deltaproteobacteria | 0           | 0            | 0           | 0            |

Sequence Count Table

|                | <b>Phylum</b>  | <b>Class</b>        | <b>Subject10WK0</b> | <b>Subject10WK12</b> | <b>Subject22WK0</b> | <b>Subject22WK12</b> |
|----------------|----------------|---------------------|---------------------|----------------------|---------------------|----------------------|
| <b>seq1856</b> | Proteobacteria | Gammaproteobacteria | 0                   | 5                    | 0                   | 0                    |
| <b>seq1162</b> | Proteobacteria | Gammaproteobacteria | 0                   | 0                    | 20                  | 24                   |
| <b>seq41</b>   | Proteobacteria | Gammaproteobacteria | 3560                | 1746                 | 66                  | 59                   |
| <b>seq561</b>  | Proteobacteria | Gammaproteobacteria | 0                   | 0                    | 0                   | 0                    |
| <b>seq814</b>  | Proteobacteria | Gammaproteobacteria | 0                   | 0                    | 0                   | 0                    |
| <b>seq979</b>  | Proteobacteria | Gammaproteobacteria | 0                   | 0                    | 0                   | 0                    |
| <b>seq97</b>   | Proteobacteria | Gammaproteobacteria | 0                   | 0                    | 242                 | 325                  |
| <b>seq116</b>  | Proteobacteria | Gammaproteobacteria | 0                   | 0                    | 0                   | 0                    |
| <b>seq151</b>  | Proteobacteria | Gammaproteobacteria | 0                   | 0                    | 0                   | 0                    |
| <b>seq168</b>  | Proteobacteria | Gammaproteobacteria | 0                   | 0                    | 0                   | 0                    |
| <b>seq295</b>  | Proteobacteria | Gammaproteobacteria | 0                   | 0                    | 0                   | 0                    |
| <b>seq296</b>  | Proteobacteria | Gammaproteobacteria | 0                   | 0                    | 0                   | 0                    |
| <b>seq334</b>  | Proteobacteria | Gammaproteobacteria | 0                   | 0                    | 0                   | 0                    |
| <b>seq389</b>  | Proteobacteria | Gammaproteobacteria | 0                   | 0                    | 0                   | 0                    |
| <b>seq431</b>  | Proteobacteria | Gammaproteobacteria | 0                   | 0                    | 0                   | 0                    |
| <b>seq482</b>  | Proteobacteria | Gammaproteobacteria | 0                   | 0                    | 0                   | 0                    |
| <b>seq622</b>  | Proteobacteria | Gammaproteobacteria | 0                   | 0                    | 0                   | 0                    |
| <b>seq993</b>  | Proteobacteria | Gammaproteobacteria | 0                   | 0                    | 0                   | 0                    |
| <b>seq1275</b> | Proteobacteria | Gammaproteobacteria | 0                   | 0                    | 0                   | 0                    |
| <b>seq1684</b> | Proteobacteria | Gammaproteobacteria | 0                   | 0                    | 0                   | 0                    |
| <b>seq1794</b> | Proteobacteria | Gammaproteobacteria | 0                   | 0                    | 0                   | 0                    |
| <b>seq460</b>  | Proteobacteria | Gammaproteobacteria | 0                   | 0                    | 0                   | 0                    |
| <b>seq841</b>  | Proteobacteria | Gammaproteobacteria | 0                   | 0                    | 0                   | 0                    |
| <b>seq1188</b> | Proteobacteria | Gammaproteobacteria | 0                   | 0                    | 0                   | 0                    |
| <b>seq1435</b> | Proteobacteria | Gammaproteobacteria | 0                   | 0                    | 0                   | 0                    |
| <b>seq1583</b> | Proteobacteria | Gammaproteobacteria | 0                   | 0                    | 0                   | 0                    |
| <b>seq126</b>  | Proteobacteria | Deltaproteobacteria | 527                 | 145                  | 418                 | 465                  |
| <b>seq279</b>  | Proteobacteria | Deltaproteobacteria | 0                   | 0                    | 0                   | 0                    |
| <b>seq118</b>  | Proteobacteria | Deltaproteobacteria | 0                   | 0                    | 0                   | 0                    |
| <b>seq269</b>  | Proteobacteria | Deltaproteobacteria | 0                   | 0                    | 0                   | 0                    |
| <b>seq889</b>  | Proteobacteria | Deltaproteobacteria | 0                   | 0                    | 0                   | 0                    |

Sequence Count Table

|         | Phylum         | Class               | Subject23WK0 | Subject23WK12 | Subject24WK0 | Subject24WK12 |
|---------|----------------|---------------------|--------------|---------------|--------------|---------------|
| seq1856 | Proteobacteria | Gammaproteobacteria | 0            | 0             | 0            | 0             |
| seq1162 | Proteobacteria | Gammaproteobacteria | 0            | 0             | 0            | 0             |
| seq41   | Proteobacteria | Gammaproteobacteria | 83           | 36            | 765          | 0             |
| seq561  | Proteobacteria | Gammaproteobacteria | 0            | 0             | 570          | 50            |
| seq814  | Proteobacteria | Gammaproteobacteria | 0            | 0             | 0            | 0             |
| seq979  | Proteobacteria | Gammaproteobacteria | 49           | 102           | 0            | 0             |
| seq97   | Proteobacteria | Gammaproteobacteria | 0            | 0             | 0            | 0             |
| seq116  | Proteobacteria | Gammaproteobacteria | 0            | 0             | 0            | 2498          |
| seq151  | Proteobacteria | Gammaproteobacteria | 1024         | 1418          | 0            | 0             |
| seq168  | Proteobacteria | Gammaproteobacteria | 0            | 0             | 81           | 0             |
| seq295  | Proteobacteria | Gammaproteobacteria | 0            | 0             | 0            | 0             |
| seq296  | Proteobacteria | Gammaproteobacteria | 0            | 0             | 0            | 0             |
| seq334  | Proteobacteria | Gammaproteobacteria | 0            | 0             | 0            | 0             |
| seq389  | Proteobacteria | Gammaproteobacteria | 0            | 0             | 0            | 0             |
| seq431  | Proteobacteria | Gammaproteobacteria | 0            | 0             | 0            | 0             |
| seq482  | Proteobacteria | Gammaproteobacteria | 0            | 0             | 0            | 0             |
| seq622  | Proteobacteria | Gammaproteobacteria | 0            | 0             | 0            | 0             |
| seq993  | Proteobacteria | Gammaproteobacteria | 0            | 0             | 0            | 0             |
| seq1275 | Proteobacteria | Gammaproteobacteria | 0            | 0             | 0            | 0             |
| seq1684 | Proteobacteria | Gammaproteobacteria | 0            | 0             | 0            | 0             |
| seq1794 | Proteobacteria | Gammaproteobacteria | 0            | 0             | 0            | 0             |
| seq460  | Proteobacteria | Gammaproteobacteria | 0            | 0             | 0            | 0             |
| seq841  | Proteobacteria | Gammaproteobacteria | 0            | 0             | 0            | 0             |
| seq1188 | Proteobacteria | Gammaproteobacteria | 0            | 14            | 0            | 0             |
| seq1435 | Proteobacteria | Gammaproteobacteria | 0            | 0             | 0            | 0             |
| seq1583 | Proteobacteria | Gammaproteobacteria | 0            | 0             | 0            | 0             |
| seq126  | Proteobacteria | Deltaproteobacteria | 0            | 0             | 19           | 0             |
| seq279  | Proteobacteria | Deltaproteobacteria | 211          | 169           | 0            | 0             |
| seq118  | Proteobacteria | Deltaproteobacteria | 0            | 0             | 0            | 0             |
| seq269  | Proteobacteria | Deltaproteobacteria | 0            | 0             | 0            | 0             |
| seq889  | Proteobacteria | Deltaproteobacteria | 52           | 151           | 0            | 0             |



Sequence Count Table

|         | Phylum         | Class               | Subject11WK0 | Subject11WK12 | Subject12WK0 | Subject12WK12 |
|---------|----------------|---------------------|--------------|---------------|--------------|---------------|
| seq1856 | Proteobacteria | Gammaproteobacteria | 0            | 0             | 0            | 0             |
| seq1162 | Proteobacteria | Gammaproteobacteria | 0            | 0             | 0            | 0             |
| seq41   | Proteobacteria | Gammaproteobacteria | 608          | 66            | 9            | 21            |
| seq561  | Proteobacteria | Gammaproteobacteria | 0            | 0             | 0            | 0             |
| seq814  | Proteobacteria | Gammaproteobacteria | 0            | 0             | 0            | 0             |
| seq979  | Proteobacteria | Gammaproteobacteria | 0            | 0             | 0            | 0             |
| seq97   | Proteobacteria | Gammaproteobacteria | 468          | 2285          | 547          | 1608          |
| seq116  | Proteobacteria | Gammaproteobacteria | 0            | 0             | 0            | 0             |
| seq151  | Proteobacteria | Gammaproteobacteria | 0            | 0             | 0            | 0             |
| seq168  | Proteobacteria | Gammaproteobacteria | 0            | 0             | 0            | 0             |
| seq295  | Proteobacteria | Gammaproteobacteria | 0            | 0             | 0            | 0             |
| seq296  | Proteobacteria | Gammaproteobacteria | 0            | 0             | 0            | 0             |
| seq334  | Proteobacteria | Gammaproteobacteria | 0            | 0             | 0            | 0             |
| seq389  | Proteobacteria | Gammaproteobacteria | 244          | 1081          | 0            | 0             |
| seq431  | Proteobacteria | Gammaproteobacteria | 0            | 0             | 275          | 817           |
| seq482  | Proteobacteria | Gammaproteobacteria | 0            | 0             | 0            | 0             |
| seq622  | Proteobacteria | Gammaproteobacteria | 0            | 0             | 0            | 0             |
| seq993  | Proteobacteria | Gammaproteobacteria | 0            | 0             | 0            | 145           |
| seq1275 | Proteobacteria | Gammaproteobacteria | 0            | 0             | 0            | 0             |
| seq1684 | Proteobacteria | Gammaproteobacteria | 0            | 0             | 0            | 0             |
| seq1794 | Proteobacteria | Gammaproteobacteria | 0            | 0             | 0            | 0             |
| seq460  | Proteobacteria | Gammaproteobacteria | 0            | 0             | 211          | 625           |
| seq841  | Proteobacteria | Gammaproteobacteria | 0            | 0             | 0            | 0             |
| seq1188 | Proteobacteria | Gammaproteobacteria | 0            | 0             | 0            | 0             |
| seq1435 | Proteobacteria | Gammaproteobacteria | 0            | 0             | 0            | 0             |
| seq1583 | Proteobacteria | Gammaproteobacteria | 0            | 0             | 0            | 0             |
| seq126  | Proteobacteria | Deltaproteobacteria | 190          | 693           | 0            | 0             |
| seq279  | Proteobacteria | Deltaproteobacteria | 0            | 0             | 105          | 186           |
| seq118  | Proteobacteria | Deltaproteobacteria | 0            | 0             | 0            | 0             |
| seq269  | Proteobacteria | Deltaproteobacteria | 0            | 0             | 0            | 0             |
| seq889  | Proteobacteria | Deltaproteobacteria | 0            | 0             | 0            | 0             |

Sequence Count Table

|                | <b>Phylum</b>  | <b>Class</b>        | <b>Subject25WK0</b> | <b>Subject25WK12</b> | <b>Subject38WK0</b> | <b>Subject38WK12</b> |
|----------------|----------------|---------------------|---------------------|----------------------|---------------------|----------------------|
| <b>seq1856</b> | Proteobacteria | Gammaproteobacteria | 0                   | 0                    | 0                   | 0                    |
| <b>seq1162</b> | Proteobacteria | Gammaproteobacteria | 16                  | 0                    | 0                   | 0                    |
| <b>seq41</b>   | Proteobacteria | Gammaproteobacteria | 303                 | 360                  | 0                   | 0                    |
| <b>seq561</b>  | Proteobacteria | Gammaproteobacteria | 0                   | 0                    | 0                   | 0                    |
| <b>seq814</b>  | Proteobacteria | Gammaproteobacteria | 0                   | 0                    | 0                   | 0                    |
| <b>seq979</b>  | Proteobacteria | Gammaproteobacteria | 0                   | 0                    | 0                   | 0                    |
| <b>seq97</b>   | Proteobacteria | Gammaproteobacteria | 0                   | 0                    | 0                   | 0                    |
| <b>seq116</b>  | Proteobacteria | Gammaproteobacteria | 0                   | 0                    | 0                   | 0                    |
| <b>seq151</b>  | Proteobacteria | Gammaproteobacteria | 0                   | 0                    | 0                   | 0                    |
| <b>seq168</b>  | Proteobacteria | Gammaproteobacteria | 0                   | 0                    | 0                   | 0                    |
| <b>seq295</b>  | Proteobacteria | Gammaproteobacteria | 0                   | 0                    | 0                   | 0                    |
| <b>seq296</b>  | Proteobacteria | Gammaproteobacteria | 0                   | 0                    | 0                   | 0                    |
| <b>seq334</b>  | Proteobacteria | Gammaproteobacteria | 0                   | 0                    | 0                   | 0                    |
| <b>seq389</b>  | Proteobacteria | Gammaproteobacteria | 0                   | 0                    | 0                   | 0                    |
| <b>seq431</b>  | Proteobacteria | Gammaproteobacteria | 0                   | 0                    | 0                   | 0                    |
| <b>seq482</b>  | Proteobacteria | Gammaproteobacteria | 0                   | 0                    | 0                   | 0                    |
| <b>seq622</b>  | Proteobacteria | Gammaproteobacteria | 0                   | 0                    | 0                   | 0                    |
| <b>seq993</b>  | Proteobacteria | Gammaproteobacteria | 0                   | 0                    | 0                   | 0                    |
| <b>seq1275</b> | Proteobacteria | Gammaproteobacteria | 0                   | 0                    | 0                   | 0                    |
| <b>seq1684</b> | Proteobacteria | Gammaproteobacteria | 0                   | 0                    | 0                   | 0                    |
| <b>seq1794</b> | Proteobacteria | Gammaproteobacteria | 0                   | 0                    | 0                   | 0                    |
| <b>seq460</b>  | Proteobacteria | Gammaproteobacteria | 0                   | 0                    | 0                   | 0                    |
| <b>seq841</b>  | Proteobacteria | Gammaproteobacteria | 0                   | 0                    | 0                   | 0                    |
| <b>seq1188</b> | Proteobacteria | Gammaproteobacteria | 0                   | 0                    | 0                   | 0                    |
| <b>seq1435</b> | Proteobacteria | Gammaproteobacteria | 0                   | 0                    | 0                   | 0                    |
| <b>seq1583</b> | Proteobacteria | Gammaproteobacteria | 0                   | 0                    | 0                   | 0                    |
| <b>seq126</b>  | Proteobacteria | Deltaproteobacteria | 143                 | 173                  | 0                   | 0                    |
| <b>seq279</b>  | Proteobacteria | Deltaproteobacteria | 0                   | 0                    | 0                   | 0                    |
| <b>seq118</b>  | Proteobacteria | Deltaproteobacteria | 1258                | 2219                 | 0                   | 0                    |
| <b>seq269</b>  | Proteobacteria | Deltaproteobacteria | 0                   | 0                    | 0                   | 0                    |
| <b>seq889</b>  | Proteobacteria | Deltaproteobacteria | 0                   | 0                    | 0                   | 0                    |

Sequence Count Table

|         | Phylum         | Class               | Subject31WK0 | Subject31WK12 | Subject32WK0 | Subject32WK12 |
|---------|----------------|---------------------|--------------|---------------|--------------|---------------|
| seq1856 | Proteobacteria | Gammaproteobacteria | 0            | 0             | 0            | 0             |
| seq1162 | Proteobacteria | Gammaproteobacteria | 0            | 0             | 0            | 0             |
| seq41   | Proteobacteria | Gammaproteobacteria | 0            | 0             | 0            | 0             |
| seq561  | Proteobacteria | Gammaproteobacteria | 0            | 0             | 0            | 0             |
| seq814  | Proteobacteria | Gammaproteobacteria | 0            | 0             | 0            | 0             |
| seq979  | Proteobacteria | Gammaproteobacteria | 0            | 0             | 0            | 0             |
| seq97   | Proteobacteria | Gammaproteobacteria | 0            | 0             | 0            | 0             |
| seq116  | Proteobacteria | Gammaproteobacteria | 0            | 0             | 0            | 0             |
| seq151  | Proteobacteria | Gammaproteobacteria | 0            | 0             | 0            | 0             |
| seq168  | Proteobacteria | Gammaproteobacteria | 0            | 0             | 1288         | 0             |
| seq295  | Proteobacteria | Gammaproteobacteria | 0            | 0             | 0            | 0             |
| seq296  | Proteobacteria | Gammaproteobacteria | 0            | 0             | 0            | 0             |
| seq334  | Proteobacteria | Gammaproteobacteria | 0            | 0             | 0            | 0             |
| seq389  | Proteobacteria | Gammaproteobacteria | 0            | 0             | 0            | 0             |
| seq431  | Proteobacteria | Gammaproteobacteria | 0            | 0             | 0            | 0             |
| seq482  | Proteobacteria | Gammaproteobacteria | 0            | 0             | 0            | 0             |
| seq622  | Proteobacteria | Gammaproteobacteria | 0            | 0             | 0            | 0             |
| seq993  | Proteobacteria | Gammaproteobacteria | 0            | 0             | 0            | 0             |
| seq1275 | Proteobacteria | Gammaproteobacteria | 0            | 0             | 0            | 0             |
| seq1684 | Proteobacteria | Gammaproteobacteria | 0            | 0             | 14           | 0             |
| seq1794 | Proteobacteria | Gammaproteobacteria | 0            | 0             | 0            | 0             |
| seq460  | Proteobacteria | Gammaproteobacteria | 0            | 0             | 0            | 0             |
| seq841  | Proteobacteria | Gammaproteobacteria | 0            | 0             | 0            | 0             |
| seq1188 | Proteobacteria | Gammaproteobacteria | 0            | 0             | 0            | 0             |
| seq1435 | Proteobacteria | Gammaproteobacteria | 0            | 0             | 0            | 0             |
| seq1583 | Proteobacteria | Gammaproteobacteria | 0            | 0             | 0            | 0             |
| seq126  | Proteobacteria | Deltaproteobacteria | 0            | 0             | 263          | 0             |
| seq279  | Proteobacteria | Deltaproteobacteria | 0            | 0             | 0            | 0             |
| seq118  | Proteobacteria | Deltaproteobacteria | 0            | 0             | 151          | 0             |
| seq269  | Proteobacteria | Deltaproteobacteria | 0            | 0             | 0            | 0             |
| seq889  | Proteobacteria | Deltaproteobacteria | 0            | 0             | 0            | 0             |

Sequence Count Table

|         | Phylum         | Class               | Subject13WK0 | Subject13WK12 | Subject39WK0 | Subject39WK12 |
|---------|----------------|---------------------|--------------|---------------|--------------|---------------|
| seq1856 | Proteobacteria | Gammaproteobacteria | 0            | 0             | 0            | 0             |
| seq1162 | Proteobacteria | Gammaproteobacteria | 0            | 0             | 0            | 0             |
| seq41   | Proteobacteria | Gammaproteobacteria | 1519         | 551           | 0            | 1971          |
| seq561  | Proteobacteria | Gammaproteobacteria | 0            | 0             | 0            | 0             |
| seq814  | Proteobacteria | Gammaproteobacteria | 0            | 0             | 0            | 258           |
| seq979  | Proteobacteria | Gammaproteobacteria | 0            | 0             | 0            | 0             |
| seq97   | Proteobacteria | Gammaproteobacteria | 0            | 0             | 0            | 0             |
| seq116  | Proteobacteria | Gammaproteobacteria | 0            | 0             | 0            | 0             |
| seq151  | Proteobacteria | Gammaproteobacteria | 0            | 0             | 0            | 0             |
| seq168  | Proteobacteria | Gammaproteobacteria | 0            | 0             | 0            | 0             |
| seq295  | Proteobacteria | Gammaproteobacteria | 0            | 0             | 0            | 0             |
| seq296  | Proteobacteria | Gammaproteobacteria | 0            | 0             | 0            | 0             |
| seq334  | Proteobacteria | Gammaproteobacteria | 0            | 0             | 0            | 0             |
| seq389  | Proteobacteria | Gammaproteobacteria | 0            | 0             | 0            | 0             |
| seq431  | Proteobacteria | Gammaproteobacteria | 0            | 0             | 0            | 0             |
| seq482  | Proteobacteria | Gammaproteobacteria | 0            | 0             | 0            | 0             |
| seq622  | Proteobacteria | Gammaproteobacteria | 0            | 0             | 0            | 0             |
| seq993  | Proteobacteria | Gammaproteobacteria | 0            | 0             | 0            | 0             |
| seq1275 | Proteobacteria | Gammaproteobacteria | 0            | 0             | 0            | 0             |
| seq1684 | Proteobacteria | Gammaproteobacteria | 0            | 0             | 0            | 0             |
| seq1794 | Proteobacteria | Gammaproteobacteria | 0            | 0             | 0            | 0             |
| seq460  | Proteobacteria | Gammaproteobacteria | 0            | 0             | 0            | 0             |
| seq841  | Proteobacteria | Gammaproteobacteria | 0            | 0             | 0            | 0             |
| seq1188 | Proteobacteria | Gammaproteobacteria | 0            | 0             | 0            | 0             |
| seq1435 | Proteobacteria | Gammaproteobacteria | 0            | 0             | 0            | 0             |
| seq1583 | Proteobacteria | Gammaproteobacteria | 0            | 0             | 0            | 0             |
| seq126  | Proteobacteria | Deltaproteobacteria | 179          | 188           | 0            | 0             |
| seq279  | Proteobacteria | Deltaproteobacteria | 0            | 0             | 0            | 0             |
| seq118  | Proteobacteria | Deltaproteobacteria | 0            | 0             | 0            | 0             |
| seq269  | Proteobacteria | Deltaproteobacteria | 0            | 0             | 0            | 0             |
| seq889  | Proteobacteria | Deltaproteobacteria | 0            | 0             | 0            | 0             |

Sequence Count Table

|                | <b>Phylum</b>  | <b>Class</b>        | <b>Subject26WK0</b> | <b>Subject26WK12</b> | <b>Subject14WK0</b> | <b>Subject14WK12</b> |
|----------------|----------------|---------------------|---------------------|----------------------|---------------------|----------------------|
| <b>seq1856</b> | Proteobacteria | Gammaproteobacteria | 0                   | 0                    | 0                   | 0                    |
| <b>seq1162</b> | Proteobacteria | Gammaproteobacteria | 0                   | 0                    | 0                   | 0                    |
| <b>seq41</b>   | Proteobacteria | Gammaproteobacteria | 1599                | 3103                 | 0                   | 0                    |
| <b>seq561</b>  | Proteobacteria | Gammaproteobacteria | 0                   | 0                    | 0                   | 0                    |
| <b>seq814</b>  | Proteobacteria | Gammaproteobacteria | 0                   | 0                    | 0                   | 0                    |
| <b>seq979</b>  | Proteobacteria | Gammaproteobacteria | 0                   | 0                    | 0                   | 0                    |
| <b>seq97</b>   | Proteobacteria | Gammaproteobacteria | 0                   | 0                    | 0                   | 0                    |
| <b>seq116</b>  | Proteobacteria | Gammaproteobacteria | 0                   | 0                    | 0                   | 0                    |
| <b>seq151</b>  | Proteobacteria | Gammaproteobacteria | 0                   | 0                    | 0                   | 0                    |
| <b>seq168</b>  | Proteobacteria | Gammaproteobacteria | 0                   | 0                    | 43                  | 0                    |
| <b>seq295</b>  | Proteobacteria | Gammaproteobacteria | 0                   | 0                    | 0                   | 0                    |
| <b>seq296</b>  | Proteobacteria | Gammaproteobacteria | 0                   | 0                    | 0                   | 0                    |
| <b>seq334</b>  | Proteobacteria | Gammaproteobacteria | 0                   | 0                    | 1173                | 612                  |
| <b>seq389</b>  | Proteobacteria | Gammaproteobacteria | 0                   | 0                    | 0                   | 0                    |
| <b>seq431</b>  | Proteobacteria | Gammaproteobacteria | 0                   | 0                    | 0                   | 0                    |
| <b>seq482</b>  | Proteobacteria | Gammaproteobacteria | 0                   | 0                    | 0                   | 0                    |
| <b>seq622</b>  | Proteobacteria | Gammaproteobacteria | 0                   | 0                    | 0                   | 0                    |
| <b>seq993</b>  | Proteobacteria | Gammaproteobacteria | 0                   | 0                    | 0                   | 0                    |
| <b>seq1275</b> | Proteobacteria | Gammaproteobacteria | 0                   | 0                    | 0                   | 0                    |
| <b>seq1684</b> | Proteobacteria | Gammaproteobacteria | 0                   | 0                    | 0                   | 0                    |
| <b>seq1794</b> | Proteobacteria | Gammaproteobacteria | 0                   | 0                    | 0                   | 0                    |
| <b>seq460</b>  | Proteobacteria | Gammaproteobacteria | 0                   | 0                    | 0                   | 0                    |
| <b>seq841</b>  | Proteobacteria | Gammaproteobacteria | 0                   | 0                    | 0                   | 0                    |
| <b>seq1188</b> | Proteobacteria | Gammaproteobacteria | 0                   | 0                    | 0                   | 0                    |
| <b>seq1435</b> | Proteobacteria | Gammaproteobacteria | 0                   | 0                    | 0                   | 0                    |
| <b>seq1583</b> | Proteobacteria | Gammaproteobacteria | 0                   | 0                    | 0                   | 0                    |
| <b>seq126</b>  | Proteobacteria | Deltaproteobacteria | 0                   | 0                    | 34                  | 22                   |
| <b>seq279</b>  | Proteobacteria | Deltaproteobacteria | 0                   | 0                    | 0                   | 0                    |
| <b>seq118</b>  | Proteobacteria | Deltaproteobacteria | 0                   | 0                    | 0                   | 0                    |
| <b>seq269</b>  | Proteobacteria | Deltaproteobacteria | 0                   | 0                    | 0                   | 0                    |
| <b>seq889</b>  | Proteobacteria | Deltaproteobacteria | 0                   | 0                    | 0                   | 0                    |

Sequence Count Table

|                | <b>Phylum</b>  | <b>Class</b>        | <b>Subject27WK0</b> | <b>Subject27WK12</b> | <b>Subject15WK0</b> | <b>Subject15WK12</b> |
|----------------|----------------|---------------------|---------------------|----------------------|---------------------|----------------------|
| <b>seq1856</b> | Proteobacteria | Gammaproteobacteria | 0                   | 0                    | 0                   | 0                    |
| <b>seq1162</b> | Proteobacteria | Gammaproteobacteria | 0                   | 0                    | 0                   | 0                    |
| <b>seq41</b>   | Proteobacteria | Gammaproteobacteria | 0                   | 203                  | 0                   | 0                    |
| <b>seq561</b>  | Proteobacteria | Gammaproteobacteria | 0                   | 0                    | 0                   | 0                    |
| <b>seq814</b>  | Proteobacteria | Gammaproteobacteria | 0                   | 0                    | 0                   | 0                    |
| <b>seq979</b>  | Proteobacteria | Gammaproteobacteria | 0                   | 0                    | 0                   | 0                    |
| <b>seq97</b>   | Proteobacteria | Gammaproteobacteria | 175                 | 83                   | 0                   | 0                    |
| <b>seq116</b>  | Proteobacteria | Gammaproteobacteria | 0                   | 0                    | 707                 | 591                  |
| <b>seq151</b>  | Proteobacteria | Gammaproteobacteria | 1205                | 1307                 | 0                   | 0                    |
| <b>seq168</b>  | Proteobacteria | Gammaproteobacteria | 0                   | 0                    | 0                   | 0                    |
| <b>seq295</b>  | Proteobacteria | Gammaproteobacteria | 0                   | 0                    | 1009                | 1160                 |
| <b>seq296</b>  | Proteobacteria | Gammaproteobacteria | 0                   | 0                    | 0                   | 0                    |
| <b>seq334</b>  | Proteobacteria | Gammaproteobacteria | 0                   | 0                    | 0                   | 0                    |
| <b>seq389</b>  | Proteobacteria | Gammaproteobacteria | 0                   | 0                    | 0                   | 0                    |
| <b>seq431</b>  | Proteobacteria | Gammaproteobacteria | 0                   | 0                    | 0                   | 0                    |
| <b>seq482</b>  | Proteobacteria | Gammaproteobacteria | 0                   | 0                    | 0                   | 0                    |
| <b>seq622</b>  | Proteobacteria | Gammaproteobacteria | 0                   | 0                    | 228                 | 272                  |
| <b>seq993</b>  | Proteobacteria | Gammaproteobacteria | 0                   | 0                    | 0                   | 0                    |
| <b>seq1275</b> | Proteobacteria | Gammaproteobacteria | 0                   | 63                   | 0                   | 0                    |
| <b>seq1684</b> | Proteobacteria | Gammaproteobacteria | 0                   | 0                    | 0                   | 0                    |
| <b>seq1794</b> | Proteobacteria | Gammaproteobacteria | 0                   | 0                    | 0                   | 0                    |
| <b>seq460</b>  | Proteobacteria | Gammaproteobacteria | 0                   | 0                    | 0                   | 0                    |
| <b>seq841</b>  | Proteobacteria | Gammaproteobacteria | 0                   | 0                    | 0                   | 0                    |
| <b>seq1188</b> | Proteobacteria | Gammaproteobacteria | 0                   | 0                    | 0                   | 0                    |
| <b>seq1435</b> | Proteobacteria | Gammaproteobacteria | 0                   | 0                    | 0                   | 0                    |
| <b>seq1583</b> | Proteobacteria | Gammaproteobacteria | 0                   | 0                    | 0                   | 0                    |
| <b>seq126</b>  | Proteobacteria | Deltaproteobacteria | 293                 | 229                  | 0                   | 0                    |
| <b>seq279</b>  | Proteobacteria | Deltaproteobacteria | 0                   | 0                    | 184                 | 293                  |
| <b>seq118</b>  | Proteobacteria | Deltaproteobacteria | 0                   | 0                    | 0                   | 0                    |
| <b>seq269</b>  | Proteobacteria | Deltaproteobacteria | 0                   | 0                    | 0                   | 0                    |
| <b>seq889</b>  | Proteobacteria | Deltaproteobacteria | 0                   | 0                    | 0                   | 0                    |

Sequence Count Table

|                | <b>Phylum</b>  | <b>Class</b>        | <b>Δ</b> |  |  |  |
|----------------|----------------|---------------------|----------|--|--|--|
| <b>seq1856</b> | Proteobacteria | Gammaproteobacteria |          |  |  |  |
| <b>seq1162</b> | Proteobacteria | Gammaproteobacteria |          |  |  |  |
| <b>seq41</b>   | Proteobacteria | Gammaproteobacteria |          |  |  |  |
| <b>seq561</b>  | Proteobacteria | Gammaproteobacteria |          |  |  |  |
| <b>seq814</b>  | Proteobacteria | Gammaproteobacteria |          |  |  |  |
| <b>seq979</b>  | Proteobacteria | Gammaproteobacteria |          |  |  |  |
| <b>seq97</b>   | Proteobacteria | Gammaproteobacteria |          |  |  |  |
| <b>seq116</b>  | Proteobacteria | Gammaproteobacteria |          |  |  |  |
| <b>seq151</b>  | Proteobacteria | Gammaproteobacteria |          |  |  |  |
| <b>seq168</b>  | Proteobacteria | Gammaproteobacteria |          |  |  |  |
| <b>seq295</b>  | Proteobacteria | Gammaproteobacteria |          |  |  |  |
| <b>seq296</b>  | Proteobacteria | Gammaproteobacteria |          |  |  |  |
| <b>seq334</b>  | Proteobacteria | Gammaproteobacteria |          |  |  |  |
| <b>seq389</b>  | Proteobacteria | Gammaproteobacteria |          |  |  |  |
| <b>seq431</b>  | Proteobacteria | Gammaproteobacteria |          |  |  |  |
| <b>seq482</b>  | Proteobacteria | Gammaproteobacteria |          |  |  |  |
| <b>seq622</b>  | Proteobacteria | Gammaproteobacteria |          |  |  |  |
| <b>seq993</b>  | Proteobacteria | Gammaproteobacteria |          |  |  |  |
| <b>seq1275</b> | Proteobacteria | Gammaproteobacteria |          |  |  |  |
| <b>seq1684</b> | Proteobacteria | Gammaproteobacteria |          |  |  |  |
| <b>seq1794</b> | Proteobacteria | Gammaproteobacteria |          |  |  |  |
| <b>seq460</b>  | Proteobacteria | Gammaproteobacteria |          |  |  |  |
| <b>seq841</b>  | Proteobacteria | Gammaproteobacteria |          |  |  |  |
| <b>seq1188</b> | Proteobacteria | Gammaproteobacteria |          |  |  |  |
| <b>seq1435</b> | Proteobacteria | Gammaproteobacteria |          |  |  |  |
| <b>seq1583</b> | Proteobacteria | Gammaproteobacteria |          |  |  |  |
| <b>seq126</b>  | Proteobacteria | Deltaproteobacteria |          |  |  |  |
| <b>seq279</b>  | Proteobacteria | Deltaproteobacteria |          |  |  |  |
| <b>seq118</b>  | Proteobacteria | Deltaproteobacteria |          |  |  |  |
| <b>seq269</b>  | Proteobacteria | Deltaproteobacteria |          |  |  |  |
| <b>seq889</b>  | Proteobacteria | Deltaproteobacteria |          |  |  |  |

Sequence Count Table

|                | <b>Phylum</b>         | <b>Class</b>        | <b>Order</b>          | <b>Family</b>          |
|----------------|-----------------------|---------------------|-----------------------|------------------------|
| <b>seq932</b>  | Proteobacteria        | Deltaproteobacteria | Desulfovibrionales    | Desulfovibrionaceae    |
| <b>seq934</b>  | Proteobacteria        | Deltaproteobacteria | Desulfovibrionales    | Desulfovibrionaceae    |
| <b>seq1064</b> | Proteobacteria        | Deltaproteobacteria | Desulfovibrionales    | Desulfovibrionaceae    |
| <b>seq1203</b> | Proteobacteria        | Deltaproteobacteria | Desulfovibrionales    | Desulfovibrionaceae    |
| <b>seq1364</b> | Proteobacteria        | Deltaproteobacteria | Desulfovibrionales    | Desulfovibrionaceae    |
| <b>seq1147</b> | Proteobacteria        | Deltaproteobacteria | Desulfovibrionales    | Desulfovibrionaceae    |
| <b>seq1156</b> | Proteobacteria        | Deltaproteobacteria | Desulfovibrionales    | Desulfovibrionaceae    |
| <b>seq1692</b> | Proteobacteria        | Deltaproteobacteria | Desulfovibrionales    | Desulfovibrionaceae    |
| <b>seq72</b>   | Proteobacteria        | Gammaproteobacteria | Enterobacteriales     | Enterobacteriaceae     |
| <b>seq110</b>  | Proteobacteria        | Gammaproteobacteria | Enterobacteriales     | Enterobacteriaceae     |
| <b>seq427</b>  | Proteobacteria        | Gammaproteobacteria | Enterobacteriales     | Enterobacteriaceae     |
| <b>seq1412</b> | Proteobacteria        | Gammaproteobacteria | Enterobacteriales     | Enterobacteriaceae     |
| <b>seq1674</b> | Proteobacteria        | Alphaproteobacteria | Rickettsiales         | Mitochondria           |
| <b>seq333</b>  | Proteobacteria        | Gammaproteobacteria | Pasteurellales        | Pasteurellaceae        |
| <b>seq1820</b> | Proteobacteria        | Gammaproteobacteria | Pasteurellales        | Pasteurellaceae        |
| <b>seq1519</b> | Proteobacteria        | Gammaproteobacteria | Pseudomonadales       | Pseudomonadaceae       |
| <b>seq1617</b> | Proteobacteria        | Gammaproteobacteria | Pseudomonadales       | Pseudomonadaceae       |
| <b>seq117</b>  | Proteobacteria        | Alphaproteobacteria | Rhodospirillales      |                        |
| <b>seq145</b>  | Proteobacteria        | Alphaproteobacteria | Rhodospirillales      |                        |
| <b>seq240</b>  | Proteobacteria        | Alphaproteobacteria | Rhodospirillales      |                        |
| <b>seq364</b>  | Proteobacteria        | Alphaproteobacteria | Rhodospirillales      |                        |
|                | <b>Proteobacteria</b> | <b>TOTAL</b>        |                       |                        |
| <b>seq1662</b> | <b>Spirochaetes</b>   | <b>Spirochaetia</b> | <b>Spirochaetales</b> | <b>Spirochaetaceae</b> |
| <b>seq694</b>  | Synergistetes         | Synergistia         | Synergistales         | Synergistaceae         |
| <b>seq1306</b> | Synergistetes         | Synergistia         | Synergistales         | Synergistaceae         |
| <b>seq403</b>  | Synergistetes         | Synergistia         | Synergistales         | Synergistaceae         |
| <b>seq1608</b> | Synergistetes         | Synergistia         | Synergistales         | Synergistaceae         |
|                | <b>Synergistetes</b>  | <b>TOTAL</b>        |                       |                        |
| <b>seq182</b>  | Tenericutes           | Mollicutes          | Izimaplasmatales      |                        |



Sequence Count Table

|                | <b>Phylum</b>         | <b>Class</b>        | <b>Genus</b>         | <b>Species</b> |
|----------------|-----------------------|---------------------|----------------------|----------------|
| <b>seq932</b>  | Proteobacteria        | Deltaproteobacteria | Desulfovibrio        | desulfuricans  |
| <b>seq934</b>  | Proteobacteria        | Deltaproteobacteria | Desulfovibrio        |                |
| <b>seq1064</b> | Proteobacteria        | Deltaproteobacteria | Desulfovibrio        |                |
| <b>seq1203</b> | Proteobacteria        | Deltaproteobacteria | Desulfovibrio        | fairfieldensis |
| <b>seq1364</b> | Proteobacteria        | Deltaproteobacteria | Desulfovibrio        |                |
| <b>seq1147</b> | Proteobacteria        | Deltaproteobacteria |                      |                |
| <b>seq1156</b> | Proteobacteria        | Deltaproteobacteria |                      |                |
| <b>seq1692</b> | Proteobacteria        | Deltaproteobacteria |                      |                |
| <b>seq72</b>   | Proteobacteria        | Gammaproteobacteria | Escherichia/Shigella |                |
| <b>seq110</b>  | Proteobacteria        | Gammaproteobacteria |                      |                |
| <b>seq427</b>  | Proteobacteria        | Gammaproteobacteria |                      |                |
| <b>seq1412</b> | Proteobacteria        | Gammaproteobacteria |                      |                |
| <b>seq1674</b> | Proteobacteria        | Alphaproteobacteria |                      |                |
| <b>seq333</b>  | Proteobacteria        | Gammaproteobacteria | Haemophilus          |                |
| <b>seq1820</b> | Proteobacteria        | Gammaproteobacteria |                      |                |
| <b>seq1519</b> | Proteobacteria        | Gammaproteobacteria | Pseudomonas          |                |
| <b>seq1617</b> | Proteobacteria        | Gammaproteobacteria | Pseudomonas          |                |
| <b>seq117</b>  | Proteobacteria        | Alphaproteobacteria |                      |                |
| <b>seq145</b>  | Proteobacteria        | Alphaproteobacteria |                      |                |
| <b>seq240</b>  | Proteobacteria        | Alphaproteobacteria |                      |                |
| <b>seq364</b>  | Proteobacteria        | Alphaproteobacteria |                      |                |
|                | <b>Proteobacteria</b> | <b>TOTAL</b>        |                      |                |
| <b>seq1662</b> | <b>Spirochaetes</b>   | <b>Spirochaetia</b> |                      |                |
| <b>seq694</b>  | Synergistetes         | Synergistia         | Cloacibacillus       | evryensis      |
| <b>seq1306</b> | Synergistetes         | Synergistia         | Cloacibacillus       |                |
| <b>seq403</b>  | Synergistetes         | Synergistia         | Pyramidobacter       | piscolens      |
| <b>seq1608</b> | Synergistetes         | Synergistia         | Pyramidobacter       |                |
|                | <b>Synergistetes</b>  | <b>TOTAL</b>        |                      |                |
| <b>seq182</b>  | Tenericutes           | Mollicutes          |                      |                |

Sequence Count Table

|         | Phylum         | Class               | Subject34WK0 | Subject34WK12 | Subject16WK0 | Subject16WK12 |
|---------|----------------|---------------------|--------------|---------------|--------------|---------------|
| seq932  | Proteobacteria | Deltaproteobacteria | 0            | 0             | 0            | 0             |
| seq934  | Proteobacteria | Deltaproteobacteria | 0            | 0             | 0            | 0             |
| seq1064 | Proteobacteria | Deltaproteobacteria | 0            | 0             | 0            | 0             |
| seq1203 | Proteobacteria | Deltaproteobacteria | 0            | 0             | 0            | 0             |
| seq1364 | Proteobacteria | Deltaproteobacteria | 0            | 0             | 0            | 0             |
| seq1147 | Proteobacteria | Deltaproteobacteria | 0            | 0             | 0            | 0             |
| seq1156 | Proteobacteria | Deltaproteobacteria | 0            | 0             | 0            | 0             |
| seq1692 | Proteobacteria | Deltaproteobacteria | 0            | 0             | 0            | 0             |
| seq72   | Proteobacteria | Gammaproteobacteria | 459          | 9090          | 0            | 0             |
| seq110  | Proteobacteria | Gammaproteobacteria | 51           | 828           | 32           | 0             |
| seq427  | Proteobacteria | Gammaproteobacteria | 0            | 141           | 0            | 0             |
| seq1412 | Proteobacteria | Gammaproteobacteria | 0            | 0             | 0            | 0             |
| seq1674 | Proteobacteria | Alphaproteobacteria | 0            | 0             | 0            | 0             |
| seq333  | Proteobacteria | Gammaproteobacteria | 0            | 15            | 162          | 53            |
| seq1820 | Proteobacteria | Gammaproteobacteria | 0            | 0             | 0            | 0             |
| seq1519 | Proteobacteria | Gammaproteobacteria | 0            | 0             | 0            | 0             |
| seq1617 | Proteobacteria | Gammaproteobacteria | 0            | 0             | 0            | 0             |
| seq117  | Proteobacteria | Alphaproteobacteria | 72           | 609           | 0            | 0             |
| seq145  | Proteobacteria | Alphaproteobacteria | 0            | 0             | 0            | 0             |
| seq240  | Proteobacteria | Alphaproteobacteria | 0            | 0             | 0            | 0             |
| seq364  | Proteobacteria | Alphaproteobacteria | 0            | 0             | 0            | 0             |
|         | Proteobacteria | <b>TOTAL</b>        | <b>1168</b>  | <b>12780</b>  | <b>4689</b>  | <b>2569</b>   |
| seq1662 | Spirochaetes   | Spirochaetia        | 0            | 0             | 0            | 0             |
| seq694  | Synergistetes  | Synergistia         | 0            | 0             | 0            | 0             |
| seq1306 | Synergistetes  | Synergistia         | 0            | 0             | 0            | 0             |
| seq403  | Synergistetes  | Synergistia         | 63           | 1172          | 0            | 0             |
| seq1608 | Synergistetes  | Synergistia         | 0            | 0             | 0            | 0             |
|         | Synergistetes  | <b>TOTAL</b>        | <b>63</b>    | <b>1172</b>   | <b>0</b>     | <b>0</b>      |
| seq182  | Tenericutes    | Mollicutes          | 0            | 0             | 0            | 0             |

Sequence Count Table

|         | Phylum         | Class               | Subject17WK0 | Subject17WK12 | Subject1WK0  | Subject1WK12 |
|---------|----------------|---------------------|--------------|---------------|--------------|--------------|
| seq932  | Proteobacteria | Deltaproteobacteria | 0            | 0             | 0            | 0            |
| seq934  | Proteobacteria | Deltaproteobacteria | 0            | 0             | 0            | 0            |
| seq1064 | Proteobacteria | Deltaproteobacteria | 0            | 0             | 0            | 0            |
| seq1203 | Proteobacteria | Deltaproteobacteria | 0            | 0             | 0            | 0            |
| seq1364 | Proteobacteria | Deltaproteobacteria | 21           | 25            | 0            | 0            |
| seq1147 | Proteobacteria | Deltaproteobacteria | 0            | 0             | 0            | 0            |
| seq1156 | Proteobacteria | Deltaproteobacteria | 22           | 23            | 0            | 0            |
| seq1692 | Proteobacteria | Deltaproteobacteria | 0            | 0             | 0            | 0            |
| seq72   | Proteobacteria | Gammaproteobacteria | 0            | 76            | 0            | 184          |
| seq110  | Proteobacteria | Gammaproteobacteria | 0            | 0             | 0            | 0            |
| seq427  | Proteobacteria | Gammaproteobacteria | 0            | 0             | 0            | 0            |
| seq1412 | Proteobacteria | Gammaproteobacteria | 0            | 0             | 0            | 0            |
| seq1674 | Proteobacteria | Alphaproteobacteria | 0            | 0             | 0            | 0            |
| seq333  | Proteobacteria | Gammaproteobacteria | 0            | 0             | 0            | 0            |
| seq1820 | Proteobacteria | Gammaproteobacteria | 0            | 0             | 0            | 0            |
| seq1519 | Proteobacteria | Gammaproteobacteria | 0            | 0             | 0            | 0            |
| seq1617 | Proteobacteria | Gammaproteobacteria | 0            | 0             | 0            | 0            |
| seq117  | Proteobacteria | Alphaproteobacteria | 0            | 0             | 2530         | 2829         |
| seq145  | Proteobacteria | Alphaproteobacteria | 0            | 0             | 0            | 0            |
| seq240  | Proteobacteria | Alphaproteobacteria | 0            | 0             | 0            | 0            |
| seq364  | Proteobacteria | Alphaproteobacteria | 0            | 0             | 0            | 0            |
|         | Proteobacteria | <b>TOTAL</b>        | <b>780</b>   | <b>1083</b>   | <b>10065</b> | <b>11867</b> |
|         |                |                     |              |               |              |              |
| seq1662 | Spirochaetes   | Spirochaetia        | 0            | 0             | 0            | 0            |
|         |                |                     |              |               |              |              |
| seq694  | Synergistetes  | Synergistia         | 0            | 0             | 0            | 0            |
| seq1306 | Synergistetes  | Synergistia         | 35           | 20            | 0            | 0            |
| seq403  | Synergistetes  | Synergistia         | 0            | 0             | 0            | 0            |
| seq1608 | Synergistetes  | Synergistia         | 0            | 0             | 0            | 0            |
|         | Synergistetes  | <b>TOTAL</b>        | <b>35</b>    | <b>20</b>     | <b>0</b>     | <b>0</b>     |
|         |                |                     |              |               |              |              |
| seq182  | Tenericutes    | Mollicutes          | 39           | 0             | 0            | 0            |

Sequence Count Table

|         | Phylum         | Class               | Subject2WK0 | Subject2WK12 | Subject3WK0 | Subject3WK12 |
|---------|----------------|---------------------|-------------|--------------|-------------|--------------|
| seq932  | Proteobacteria | Deltaproteobacteria | 0           | 0            | 0           | 0            |
| seq934  | Proteobacteria | Deltaproteobacteria | 0           | 0            | 0           | 0            |
| seq1064 | Proteobacteria | Deltaproteobacteria | 0           | 0            | 0           | 0            |
| seq1203 | Proteobacteria | Deltaproteobacteria | 0           | 0            | 0           | 0            |
| seq1364 | Proteobacteria | Deltaproteobacteria | 0           | 0            | 0           | 0            |
| seq1147 | Proteobacteria | Deltaproteobacteria | 0           | 0            | 0           | 0            |
| seq1156 | Proteobacteria | Deltaproteobacteria | 0           | 0            | 0           | 0            |
| seq1692 | Proteobacteria | Deltaproteobacteria | 0           | 0            | 0           | 0            |
| seq72   | Proteobacteria | Gammaproteobacteria | 0           | 257          | 2591        | 109          |
| seq110  | Proteobacteria | Gammaproteobacteria | 0           | 118          | 53          | 0            |
| seq427  | Proteobacteria | Gammaproteobacteria | 0           | 0            | 0           | 0            |
| seq1412 | Proteobacteria | Gammaproteobacteria | 0           | 0            | 0           | 0            |
| seq1674 | Proteobacteria | Alphaproteobacteria | 0           | 0            | 0           | 0            |
| seq333  | Proteobacteria | Gammaproteobacteria | 21          | 13           | 0           | 0            |
| seq1820 | Proteobacteria | Gammaproteobacteria | 0           | 0            | 0           | 0            |
| seq1519 | Proteobacteria | Gammaproteobacteria | 0           | 0            | 0           | 0            |
| seq1617 | Proteobacteria | Gammaproteobacteria | 0           | 0            | 0           | 0            |
| seq117  | Proteobacteria | Alphaproteobacteria | 0           | 0            | 0           | 0            |
| seq145  | Proteobacteria | Alphaproteobacteria | 0           | 0            | 0           | 0            |
| seq240  | Proteobacteria | Alphaproteobacteria | 0           | 0            | 0           | 0            |
| seq364  | Proteobacteria | Alphaproteobacteria | 0           | 0            | 0           | 0            |
|         | Proteobacteria | <b>TOTAL</b>        | 1875        | 2709         | 3042        | 436          |
| seq1662 | Spirochaetes   | Spirochaetia        | 0           | 0            | 0           | 0            |
| seq694  | Synergistetes  | Synergistia         | 0           | 0            | 0           | 0            |
| seq1306 | Synergistetes  | Synergistia         | 0           | 0            | 0           | 0            |
| seq403  | Synergistetes  | Synergistia         | 0           | 0            | 0           | 0            |
| seq1608 | Synergistetes  | Synergistia         | 0           | 0            | 0           | 0            |
|         | Synergistetes  | <b>TOTAL</b>        | 0           | 0            | 0           | 0            |
| seq182  | Tenericutes    | Mollicutes          | 0           | 0            | 0           | 0            |

Sequence Count Table

|         | Phylum         | Class               | Subject4WK0 | Subject4WK12 | Subject5WK0 | Subject5WK12 |
|---------|----------------|---------------------|-------------|--------------|-------------|--------------|
| seq932  | Proteobacteria | Deltaproteobacteria | 49          | 126          | 0           | 0            |
| seq934  | Proteobacteria | Deltaproteobacteria | 0           | 0            | 0           | 0            |
| seq1064 | Proteobacteria | Deltaproteobacteria | 0           | 0            | 0           | 0            |
| seq1203 | Proteobacteria | Deltaproteobacteria | 0           | 0            | 0           | 0            |
| seq1364 | Proteobacteria | Deltaproteobacteria | 0           | 0            | 0           | 0            |
| seq1147 | Proteobacteria | Deltaproteobacteria | 0           | 0            | 0           | 0            |
| seq1156 | Proteobacteria | Deltaproteobacteria | 0           | 0            | 0           | 0            |
| seq1692 | Proteobacteria | Deltaproteobacteria | 0           | 0            | 0           | 0            |
| seq72   | Proteobacteria | Gammaproteobacteria | 89          | 194          | 212         | 157          |
| seq110  | Proteobacteria | Gammaproteobacteria | 0           | 0            | 0           | 0            |
| seq427  | Proteobacteria | Gammaproteobacteria | 0           | 0            | 0           | 0            |
| seq1412 | Proteobacteria | Gammaproteobacteria | 0           | 0            | 0           | 0            |
| seq1674 | Proteobacteria | Alphaproteobacteria | 0           | 0            | 0           | 0            |
| seq333  | Proteobacteria | Gammaproteobacteria | 0           | 0            | 0           | 0            |
| seq1820 | Proteobacteria | Gammaproteobacteria | 0           | 0            | 0           | 0            |
| seq1519 | Proteobacteria | Gammaproteobacteria | 0           | 0            | 0           | 0            |
| seq1617 | Proteobacteria | Gammaproteobacteria | 0           | 0            | 0           | 0            |
| seq117  | Proteobacteria | Alphaproteobacteria | 0           | 0            | 0           | 0            |
| seq145  | Proteobacteria | Alphaproteobacteria | 0           | 0            | 0           | 0            |
| seq240  | Proteobacteria | Alphaproteobacteria | 0           | 0            | 0           | 0            |
| seq364  | Proteobacteria | Alphaproteobacteria | 0           | 0            | 0           | 0            |
|         | Proteobacteria | <b>TOTAL</b>        | <b>600</b>  | <b>2149</b>  | <b>2293</b> | <b>1960</b>  |
| seq1662 | Spirochaetes   | Spirochaetia        | 0           | 0            | 0           | 0            |
| seq694  | Synergistetes  | Synergistia         | 0           | 0            | 0           | 0            |
| seq1306 | Synergistetes  | Synergistia         | 0           | 0            | 0           | 0            |
| seq403  | Synergistetes  | Synergistia         | 0           | 0            | 0           | 0            |
| seq1608 | Synergistetes  | Synergistia         | 0           | 0            | 0           | 0            |
|         | Synergistetes  | <b>TOTAL</b>        | <b>0</b>    | <b>0</b>     | <b>0</b>    | <b>0</b>     |
| seq182  | Tenericutes    | Mollicutes          | 0           | 0            | 0           | 0            |

Sequence Count Table

|         | Phylum         | Class               | Subject6WK0 | Subject6WK12 | Subject18WK0 | Subject18WK12 |
|---------|----------------|---------------------|-------------|--------------|--------------|---------------|
| seq932  | Proteobacteria | Deltaproteobacteria | 0           | 0            | 0            | 0             |
| seq934  | Proteobacteria | Deltaproteobacteria | 0           | 0            | 0            | 0             |
| seq1064 | Proteobacteria | Deltaproteobacteria | 0           | 0            | 0            | 0             |
| seq1203 | Proteobacteria | Deltaproteobacteria | 0           | 0            | 0            | 0             |
| seq1364 | Proteobacteria | Deltaproteobacteria | 0           | 0            | 0            | 0             |
| seq1147 | Proteobacteria | Deltaproteobacteria | 0           | 0            | 0            | 0             |
| seq1156 | Proteobacteria | Deltaproteobacteria | 0           | 0            | 27           | 9             |
| seq1692 | Proteobacteria | Deltaproteobacteria | 13          | 0            | 0            | 0             |
| seq72   | Proteobacteria | Gammaproteobacteria | 27          | 260          | 0            | 165           |
| seq110  | Proteobacteria | Gammaproteobacteria | 0           | 0            | 34           | 0             |
| seq427  | Proteobacteria | Gammaproteobacteria | 0           | 0            | 0            | 0             |
| seq1412 | Proteobacteria | Gammaproteobacteria | 0           | 0            | 0            | 0             |
| seq1674 | Proteobacteria | Alphaproteobacteria | 0           | 0            | 0            | 0             |
| seq333  | Proteobacteria | Gammaproteobacteria | 0           | 0            | 17           | 3             |
| seq1820 | Proteobacteria | Gammaproteobacteria | 0           | 0            | 0            | 0             |
| seq1519 | Proteobacteria | Gammaproteobacteria | 0           | 0            | 0            | 0             |
| seq1617 | Proteobacteria | Gammaproteobacteria | 0           | 0            | 0            | 0             |
| seq117  | Proteobacteria | Alphaproteobacteria | 46          | 333          | 0            | 0             |
| seq145  | Proteobacteria | Alphaproteobacteria | 0           | 0            | 0            | 0             |
| seq240  | Proteobacteria | Alphaproteobacteria | 0           | 0            | 0            | 0             |
| seq364  | Proteobacteria | Alphaproteobacteria | 141         | 392          | 0            | 0             |
|         | Proteobacteria | <b>TOTAL</b>        | <b>1977</b> | <b>4060</b>  | <b>4463</b>  | <b>2276</b>   |
|         |                |                     |             |              |              |               |
| seq1662 | Spirochaetes   | Spirochaetia        | 0           | 0            | 0            | 0             |
|         |                |                     |             |              |              |               |
| seq694  | Synergistetes  | Synergistia         | 0           | 0            | 0            | 0             |
| seq1306 | Synergistetes  | Synergistia         | 0           | 0            | 0            | 0             |
| seq403  | Synergistetes  | Synergistia         | 0           | 0            | 0            | 0             |
| seq1608 | Synergistetes  | Synergistia         | 0           | 0            | 0            | 0             |
|         | Synergistetes  | <b>TOTAL</b>        | <b>0</b>    | <b>0</b>     | <b>0</b>     | <b>0</b>      |
|         |                |                     |             |              |              |               |
| seq182  | Tenericutes    | Mollicutes          | 923         | 436          | 0            | 0             |

Sequence Count Table

|         | Phylum         | Class               | Subject19WK0 | Subject19WK12 | Subject20WK0 | Subject20WK12 |
|---------|----------------|---------------------|--------------|---------------|--------------|---------------|
| seq932  | Proteobacteria | Deltaproteobacteria | 0            | 0             | 0            | 0             |
| seq934  | Proteobacteria | Deltaproteobacteria | 42           | 14            | 0            | 0             |
| seq1064 | Proteobacteria | Deltaproteobacteria | 0            | 0             | 0            | 117           |
| seq1203 | Proteobacteria | Deltaproteobacteria | 0            | 0             | 0            | 0             |
| seq1364 | Proteobacteria | Deltaproteobacteria | 0            | 0             | 0            | 0             |
| seq1147 | Proteobacteria | Deltaproteobacteria | 0            | 0             | 0            | 0             |
| seq1156 | Proteobacteria | Deltaproteobacteria | 0            | 0             | 0            | 0             |
| seq1692 | Proteobacteria | Deltaproteobacteria | 0            | 0             | 0            | 0             |
| seq72   | Proteobacteria | Gammaproteobacteria | 17           | 607           | 300          | 870           |
| seq110  | Proteobacteria | Gammaproteobacteria | 0            | 0             | 0            | 0             |
| seq427  | Proteobacteria | Gammaproteobacteria | 0            | 0             | 0            | 0             |
| seq1412 | Proteobacteria | Gammaproteobacteria | 0            | 0             | 0            | 0             |
| seq1674 | Proteobacteria | Alphaproteobacteria | 14           | 0             | 0            | 0             |
| seq333  | Proteobacteria | Gammaproteobacteria | 116          | 15            | 70           | 199           |
| seq1820 | Proteobacteria | Gammaproteobacteria | 0            | 0             | 0            | 0             |
| seq1519 | Proteobacteria | Gammaproteobacteria | 0            | 0             | 0            | 0             |
| seq1617 | Proteobacteria | Gammaproteobacteria | 0            | 13            | 0            | 0             |
| seq117  | Proteobacteria | Alphaproteobacteria | 0            | 0             | 0            | 0             |
| seq145  | Proteobacteria | Alphaproteobacteria | 0            | 0             | 0            | 0             |
| seq240  | Proteobacteria | Alphaproteobacteria | 0            | 0             | 0            | 0             |
| seq364  | Proteobacteria | Alphaproteobacteria | 0            | 0             | 0            | 0             |
|         | Proteobacteria | <b>TOTAL</b>        | 189          | 649           | 1437         | 2790          |
| seq1662 | Spirochaetes   | Spirochaetia        | 0            | 0             | 15           | 0             |
| seq694  | Synergistetes  | Synergistia         | 0            | 0             | 0            | 7             |
| seq1306 | Synergistetes  | Synergistia         | 0            | 0             | 0            | 0             |
| seq403  | Synergistetes  | Synergistia         | 0            | 0             | 0            | 0             |
| seq1608 | Synergistetes  | Synergistia         | 0            | 0             | 0            | 0             |
|         | Synergistetes  | <b>TOTAL</b>        | 0            | 0             | 0            | 7             |
| seq182  | Tenericutes    | Mollicutes          | 0            | 0             | 0            | 0             |

Sequence Count Table

|         | Phylum         | Class               | Subject7WK0 | Subject7WK12 | Subject21WK0 | Subject21WK12 |
|---------|----------------|---------------------|-------------|--------------|--------------|---------------|
| seq932  | Proteobacteria | Deltaproteobacteria | 0           | 0            | 0            | 0             |
| seq934  | Proteobacteria | Deltaproteobacteria | 0           | 0            | 0            | 0             |
| seq1064 | Proteobacteria | Deltaproteobacteria | 0           | 0            | 0            | 0             |
| seq1203 | Proteobacteria | Deltaproteobacteria | 17          | 37           | 0            | 0             |
| seq1364 | Proteobacteria | Deltaproteobacteria | 0           | 0            | 0            | 0             |
| seq1147 | Proteobacteria | Deltaproteobacteria | 0           | 0            | 0            | 0             |
| seq1156 | Proteobacteria | Deltaproteobacteria | 0           | 0            | 0            | 0             |
| seq1692 | Proteobacteria | Deltaproteobacteria | 0           | 0            | 0            | 0             |
| seq72   | Proteobacteria | Gammaproteobacteria | 0           | 180          | 97           | 421           |
| seq110  | Proteobacteria | Gammaproteobacteria | 0           | 0            | 0            | 0             |
| seq427  | Proteobacteria | Gammaproteobacteria | 0           | 0            | 0            | 0             |
| seq1412 | Proteobacteria | Gammaproteobacteria | 0           | 0            | 0            | 0             |
| seq1674 | Proteobacteria | Alphaproteobacteria | 0           | 0            | 0            | 0             |
| seq333  | Proteobacteria | Gammaproteobacteria | 0           | 48           | 0            | 0             |
| seq1820 | Proteobacteria | Gammaproteobacteria | 0           | 0            | 0            | 0             |
| seq1519 | Proteobacteria | Gammaproteobacteria | 0           | 0            | 0            | 0             |
| seq1617 | Proteobacteria | Gammaproteobacteria | 0           | 0            | 0            | 0             |
| seq117  | Proteobacteria | Alphaproteobacteria | 0           | 0            | 0            | 0             |
| seq145  | Proteobacteria | Alphaproteobacteria | 322         | 2559         | 0            | 0             |
| seq240  | Proteobacteria | Alphaproteobacteria | 0           | 0            | 0            | 0             |
| seq364  | Proteobacteria | Alphaproteobacteria | 0           | 0            | 0            | 0             |
|         | Proteobacteria | <b>TOTAL</b>        | 1512        | 6810         | 2672         | 3559          |
|         |                |                     |             |              |              |               |
| seq1662 | Spirochaetes   | Spirochaetia        | 0           | 0            | 0            | 0             |
|         |                |                     |             |              |              |               |
| seq694  | Synergistetes  | Synergistia         | 0           | 0            | 0            | 0             |
| seq1306 | Synergistetes  | Synergistia         | 0           | 0            | 0            | 0             |
| seq403  | Synergistetes  | Synergistia         | 0           | 0            | 0            | 0             |
| seq1608 | Synergistetes  | Synergistia         | 0           | 0            | 0            | 0             |
|         | Synergistetes  | <b>TOTAL</b>        | 0           | 0            | 0            | 0             |
|         |                |                     |             |              |              |               |
| seq182  | Tenericutes    | Mollicutes          | 0           | 0            | 0            | 0             |



Sequence Count Table

|         | Phylum         | Class               | Subject8WK0 | Subject8WK12 | Subject9WK0 | Subject9WK12 |
|---------|----------------|---------------------|-------------|--------------|-------------|--------------|
| seq932  | Proteobacteria | Deltaproteobacteria | 0           | 0            | 0           | 0            |
| seq934  | Proteobacteria | Deltaproteobacteria | 0           | 0            | 0           | 0            |
| seq1064 | Proteobacteria | Deltaproteobacteria | 0           | 0            | 0           | 0            |
| seq1203 | Proteobacteria | Deltaproteobacteria | 0           | 0            | 0           | 0            |
| seq1364 | Proteobacteria | Deltaproteobacteria | 0           | 0            | 0           | 0            |
| seq1147 | Proteobacteria | Deltaproteobacteria | 0           | 0            | 0           | 0            |
| seq1156 | Proteobacteria | Deltaproteobacteria | 0           | 0            | 0           | 0            |
| seq1692 | Proteobacteria | Deltaproteobacteria | 0           | 0            | 0           | 0            |
| seq72   | Proteobacteria | Gammaproteobacteria | 0           | 50           | 14          | 143          |
| seq110  | Proteobacteria | Gammaproteobacteria | 16          | 0            | 0           | 0            |
| seq427  | Proteobacteria | Gammaproteobacteria | 0           | 0            | 0           | 0            |
| seq1412 | Proteobacteria | Gammaproteobacteria | 0           | 0            | 0           | 0            |
| seq1674 | Proteobacteria | Alphaproteobacteria | 0           | 0            | 0           | 0            |
| seq333  | Proteobacteria | Gammaproteobacteria | 84          | 0            | 0           | 0            |
| seq1820 | Proteobacteria | Gammaproteobacteria | 0           | 0            | 0           | 0            |
| seq1519 | Proteobacteria | Gammaproteobacteria | 0           | 0            | 0           | 0            |
| seq1617 | Proteobacteria | Gammaproteobacteria | 0           | 0            | 0           | 0            |
| seq117  | Proteobacteria | Alphaproteobacteria | 0           | 0            | 0           | 0            |
| seq145  | Proteobacteria | Alphaproteobacteria | 621         | 42           | 0           | 0            |
| seq240  | Proteobacteria | Alphaproteobacteria | 2737        | 931          | 0           | 0            |
| seq364  | Proteobacteria | Alphaproteobacteria | 0           | 0            | 0           | 0            |
|         | Proteobacteria | <b>TOTAL</b>        | <b>7073</b> | <b>3713</b>  | <b>1170</b> | <b>5335</b>  |
| seq1662 | Spirochaetes   | Spirochaetia        | 0           | 0            | 0           | 0            |
| seq694  | Synergistetes  | Synergistia         | 0           | 0            | 0           | 0            |
| seq1306 | Synergistetes  | Synergistia         | 0           | 0            | 0           | 0            |
| seq403  | Synergistetes  | Synergistia         | 0           | 0            | 0           | 0            |
| seq1608 | Synergistetes  | Synergistia         | 0           | 0            | 0           | 0            |
|         | Synergistetes  | <b>TOTAL</b>        | <b>0</b>    | <b>0</b>     | <b>0</b>    | <b>0</b>     |
| seq182  | Tenericutes    | Mollicutes          | 0           | 0            | 0           | 0            |

Sequence Count Table

|         | Phylum         | Class               | Subject10WK0 | Subject10WK12 | Subject22WK0 | Subject22WK12 |
|---------|----------------|---------------------|--------------|---------------|--------------|---------------|
| seq932  | Proteobacteria | Deltaproteobacteria | 0            | 0             | 0            | 0             |
| seq934  | Proteobacteria | Deltaproteobacteria | 0            | 0             | 0            | 0             |
| seq1064 | Proteobacteria | Deltaproteobacteria | 0            | 0             | 0            | 0             |
| seq1203 | Proteobacteria | Deltaproteobacteria | 0            | 0             | 0            | 0             |
| seq1364 | Proteobacteria | Deltaproteobacteria | 0            | 0             | 0            | 0             |
| seq1147 | Proteobacteria | Deltaproteobacteria | 0            | 0             | 0            | 0             |
| seq1156 | Proteobacteria | Deltaproteobacteria | 0            | 0             | 0            | 0             |
| seq1692 | Proteobacteria | Deltaproteobacteria | 0            | 0             | 0            | 0             |
| seq72   | Proteobacteria | Gammaproteobacteria | 90           | 44            | 26           | 202           |
| seq110  | Proteobacteria | Gammaproteobacteria | 0            | 0             | 0            | 0             |
| seq427  | Proteobacteria | Gammaproteobacteria | 0            | 0             | 0            | 0             |
| seq1412 | Proteobacteria | Gammaproteobacteria | 0            | 0             | 0            | 0             |
| seq1674 | Proteobacteria | Alphaproteobacteria | 0            | 0             | 0            | 0             |
| seq333  | Proteobacteria | Gammaproteobacteria | 0            | 0             | 77           | 17            |
| seq1820 | Proteobacteria | Gammaproteobacteria | 0            | 0             | 0            | 0             |
| seq1519 | Proteobacteria | Gammaproteobacteria | 0            | 0             | 0            | 0             |
| seq1617 | Proteobacteria | Gammaproteobacteria | 0            | 0             | 0            | 0             |
| seq117  | Proteobacteria | Alphaproteobacteria | 497          | 1065          | 0            | 0             |
| seq145  | Proteobacteria | Alphaproteobacteria | 0            | 0             | 0            | 0             |
| seq240  | Proteobacteria | Alphaproteobacteria | 0            | 0             | 0            | 0             |
| seq364  | Proteobacteria | Alphaproteobacteria | 0            | 0             | 354          | 597           |
|         | Proteobacteria | <b>TOTAL</b>        | 4674         | 3005          | 1203         | 1689          |
| seq1662 | Spirochaetes   | Spirochaetia        | 0            | 0             | 0            | 0             |
| seq694  | Synergistetes  | Synergistia         | 0            | 0             | 28           | 94            |
| seq1306 | Synergistetes  | Synergistia         | 0            | 0             | 0            | 0             |
| seq403  | Synergistetes  | Synergistia         | 0            | 0             | 0            | 0             |
| seq1608 | Synergistetes  | Synergistia         | 0            | 0             | 0            | 0             |
|         | Synergistetes  | <b>TOTAL</b>        | 0            | 0             | 28           | 94            |
| seq182  | Tenericutes    | Mollicutes          | 0            | 0             | 2582         | 2150          |

Sequence Count Table

|         | Phylum         | Class               | Subject23WK0 | Subject23WK12 | Subject24WK0 | Subject24WK12 |
|---------|----------------|---------------------|--------------|---------------|--------------|---------------|
| seq932  | Proteobacteria | Deltaproteobacteria | 0            | 0             | 0            | 0             |
| seq934  | Proteobacteria | Deltaproteobacteria | 0            | 0             | 0            | 0             |
| seq1064 | Proteobacteria | Deltaproteobacteria | 0            | 0             | 0            | 0             |
| seq1203 | Proteobacteria | Deltaproteobacteria | 25           | 0             | 0            | 0             |
| seq1364 | Proteobacteria | Deltaproteobacteria | 0            | 0             | 0            | 0             |
| seq1147 | Proteobacteria | Deltaproteobacteria | 0            | 0             | 0            | 0             |
| seq1156 | Proteobacteria | Deltaproteobacteria | 0            | 0             | 0            | 0             |
| seq1692 | Proteobacteria | Deltaproteobacteria | 0            | 0             | 0            | 0             |
| seq72   | Proteobacteria | Gammaproteobacteria | 0            | 42            | 0            | 94            |
| seq110  | Proteobacteria | Gammaproteobacteria | 37           | 0             | 80           | 0             |
| seq427  | Proteobacteria | Gammaproteobacteria | 0            | 0             | 0            | 0             |
| seq1412 | Proteobacteria | Gammaproteobacteria | 0            | 0             | 0            | 0             |
| seq1674 | Proteobacteria | Alphaproteobacteria | 0            | 0             | 0            | 0             |
| seq333  | Proteobacteria | Gammaproteobacteria | 0            | 93            | 531          | 18            |
| seq1820 | Proteobacteria | Gammaproteobacteria | 0            | 0             | 0            | 0             |
| seq1519 | Proteobacteria | Gammaproteobacteria | 0            | 0             | 0            | 0             |
| seq1617 | Proteobacteria | Gammaproteobacteria | 0            | 0             | 0            | 0             |
| seq117  | Proteobacteria | Alphaproteobacteria | 0            | 0             | 95           | 0             |
| seq145  | Proteobacteria | Alphaproteobacteria | 1621         | 3791          | 0            | 0             |
| seq240  | Proteobacteria | Alphaproteobacteria | 0            | 0             | 0            | 0             |
| seq364  | Proteobacteria | Alphaproteobacteria | 0            | 0             | 0            | 0             |
|         | Proteobacteria | <b>TOTAL</b>        | <b>3102</b>  | <b>5816</b>   | <b>2141</b>  | <b>2660</b>   |
| seq1662 | Spirochaetes   | Spirochaetia        | 0            | 0             | 0            | 0             |
| seq694  | Synergistetes  | Synergistia         | 0            | 0             | 0            | 0             |
| seq1306 | Synergistetes  | Synergistia         | 0            | 0             | 0            | 0             |
| seq403  | Synergistetes  | Synergistia         | 0            | 0             | 0            | 0             |
| seq1608 | Synergistetes  | Synergistia         | 3            | 16            | 0            | 0             |
|         | Synergistetes  | <b>TOTAL</b>        | <b>3</b>     | <b>16</b>     | <b>0</b>     | <b>0</b>      |
| seq182  | Tenericutes    | Mollicutes          | 0            | 0             | 0            | 0             |

Sequence Count Table

|         | Phylum         | Class               | Subject11WK0 | Subject11WK12 | Subject12WK0 | Subject12WK12 |
|---------|----------------|---------------------|--------------|---------------|--------------|---------------|
| seq932  | Proteobacteria | Deltaproteobacteria | 0            | 0             | 0            | 0             |
| seq934  | Proteobacteria | Deltaproteobacteria | 0            | 0             | 0            | 0             |
| seq1064 | Proteobacteria | Deltaproteobacteria | 0            | 0             | 0            | 0             |
| seq1203 | Proteobacteria | Deltaproteobacteria | 0            | 0             | 0            | 0             |
| seq1364 | Proteobacteria | Deltaproteobacteria | 0            | 0             | 0            | 0             |
| seq1147 | Proteobacteria | Deltaproteobacteria | 0            | 0             | 0            | 0             |
| seq1156 | Proteobacteria | Deltaproteobacteria | 0            | 0             | 0            | 0             |
| seq1692 | Proteobacteria | Deltaproteobacteria | 0            | 0             | 0            | 0             |
| seq72   | Proteobacteria | Gammaproteobacteria | 130          | 36            | 0            | 126           |
| seq110  | Proteobacteria | Gammaproteobacteria | 0            | 0             | 0            | 0             |
| seq427  | Proteobacteria | Gammaproteobacteria | 0            | 0             | 0            | 0             |
| seq1412 | Proteobacteria | Gammaproteobacteria | 0            | 0             | 0            | 0             |
| seq1674 | Proteobacteria | Alphaproteobacteria | 0            | 0             | 0            | 0             |
| seq333  | Proteobacteria | Gammaproteobacteria | 0            | 0             | 0            | 0             |
| seq1820 | Proteobacteria | Gammaproteobacteria | 0            | 0             | 0            | 0             |
| seq1519 | Proteobacteria | Gammaproteobacteria | 27           | 0             | 0            | 0             |
| seq1617 | Proteobacteria | Gammaproteobacteria | 0            | 0             | 0            | 0             |
| seq117  | Proteobacteria | Alphaproteobacteria | 0            | 0             | 50           | 30            |
| seq145  | Proteobacteria | Alphaproteobacteria | 0            | 0             | 0            | 0             |
| seq240  | Proteobacteria | Alphaproteobacteria | 0            | 0             | 0            | 0             |
| seq364  | Proteobacteria | Alphaproteobacteria | 0            | 0             | 0            | 0             |
|         | Proteobacteria | <b>TOTAL</b>        | 1667         | 4161          | 1197         | 3558          |
| seq1662 | Spirochaetes   | Spirochaetia        | 0            | 0             | 0            | 0             |
| seq694  | Synergistetes  | Synergistia         | 0            | 0             | 0            | 0             |
| seq1306 | Synergistetes  | Synergistia         | 0            | 0             | 0            | 0             |
| seq403  | Synergistetes  | Synergistia         | 0            | 0             | 0            | 0             |
| seq1608 | Synergistetes  | Synergistia         | 0            | 0             | 0            | 0             |
|         | Synergistetes  | <b>TOTAL</b>        | 0            | 0             | 0            | 0             |
| seq182  | Tenericutes    | Mollicutes          | 0            | 0             | 0            | 0             |

Sequence Count Table

|         | Phylum         | Class               | Subject25WK0 | Subject25WK12 | Subject38WK0 | Subject38WK12 |
|---------|----------------|---------------------|--------------|---------------|--------------|---------------|
| seq932  | Proteobacteria | Deltaproteobacteria | 0            | 0             | 0            | 0             |
| seq934  | Proteobacteria | Deltaproteobacteria | 0            | 0             | 0            | 0             |
| seq1064 | Proteobacteria | Deltaproteobacteria | 0            | 0             | 0            | 0             |
| seq1203 | Proteobacteria | Deltaproteobacteria | 0            | 0             | 0            | 0             |
| seq1364 | Proteobacteria | Deltaproteobacteria | 0            | 0             | 0            | 0             |
| seq1147 | Proteobacteria | Deltaproteobacteria | 0            | 0             | 0            | 0             |
| seq1156 | Proteobacteria | Deltaproteobacteria | 0            | 0             | 0            | 0             |
| seq1692 | Proteobacteria | Deltaproteobacteria | 0            | 0             | 0            | 0             |
| seq72   | Proteobacteria | Gammaproteobacteria | 0            | 323           | 0            | 28            |
| seq110  | Proteobacteria | Gammaproteobacteria | 0            | 33            | 0            | 0             |
| seq427  | Proteobacteria | Gammaproteobacteria | 0            | 0             | 0            | 0             |
| seq1412 | Proteobacteria | Gammaproteobacteria | 0            | 0             | 0            | 0             |
| seq1674 | Proteobacteria | Alphaproteobacteria | 0            | 0             | 0            | 0             |
| seq333  | Proteobacteria | Gammaproteobacteria | 0            | 0             | 0            | 0             |
| seq1820 | Proteobacteria | Gammaproteobacteria | 0            | 0             | 0            | 0             |
| seq1519 | Proteobacteria | Gammaproteobacteria | 0            | 0             | 0            | 0             |
| seq1617 | Proteobacteria | Gammaproteobacteria | 0            | 0             | 0            | 0             |
| seq117  | Proteobacteria | Alphaproteobacteria | 0            | 0             | 0            | 0             |
| seq145  | Proteobacteria | Alphaproteobacteria | 0            | 0             | 0            | 0             |
| seq240  | Proteobacteria | Alphaproteobacteria | 0            | 0             | 0            | 0             |
| seq364  | Proteobacteria | Alphaproteobacteria | 0            | 0             | 0            | 0             |
|         | Proteobacteria | <b>TOTAL</b>        | 1720         | 3108          | 0            | 28            |
|         |                |                     |              |               |              |               |
| seq1662 | Spirochaetes   | Spirochaetia        | 0            | 0             | 0            | 0             |
|         |                |                     |              |               |              |               |
| seq694  | Synergistetes  | Synergistia         | 199          | 5             | 0            | 0             |
| seq1306 | Synergistetes  | Synergistia         | 0            | 0             | 0            | 0             |
| seq403  | Synergistetes  | Synergistia         | 0            | 0             | 0            | 0             |
| seq1608 | Synergistetes  | Synergistia         | 0            | 0             | 0            | 0             |
|         | Synergistetes  | <b>TOTAL</b>        | 199          | 5             | 0            | 0             |
|         |                |                     |              |               |              |               |
| seq182  | Tenericutes    | Mollicutes          | 0            | 0             | 0            | 0             |

Sequence Count Table

|         | Phylum         | Class               | Subject31WK0 | Subject31WK12 | Subject32WK0 | Subject32WK12 |
|---------|----------------|---------------------|--------------|---------------|--------------|---------------|
| seq932  | Proteobacteria | Deltaproteobacteria | 0            | 0             | 0            | 0             |
| seq934  | Proteobacteria | Deltaproteobacteria | 0            | 0             | 0            | 0             |
| seq1064 | Proteobacteria | Deltaproteobacteria | 0            | 0             | 0            | 0             |
| seq1203 | Proteobacteria | Deltaproteobacteria | 0            | 0             | 0            | 0             |
| seq1364 | Proteobacteria | Deltaproteobacteria | 0            | 0             | 0            | 0             |
| seq1147 | Proteobacteria | Deltaproteobacteria | 0            | 0             | 0            | 0             |
| seq1156 | Proteobacteria | Deltaproteobacteria | 0            | 0             | 10           | 0             |
| seq1692 | Proteobacteria | Deltaproteobacteria | 0            | 0             | 0            | 0             |
| seq72   | Proteobacteria | Gammaproteobacteria | 0            | 0             | 24           | 65            |
| seq110  | Proteobacteria | Gammaproteobacteria | 0            | 0             | 0            | 0             |
| seq427  | Proteobacteria | Gammaproteobacteria | 0            | 0             | 0            | 0             |
| seq1412 | Proteobacteria | Gammaproteobacteria | 0            | 0             | 0            | 0             |
| seq1674 | Proteobacteria | Alphaproteobacteria | 0            | 0             | 0            | 0             |
| seq333  | Proteobacteria | Gammaproteobacteria | 0            | 0             | 7            | 0             |
| seq1820 | Proteobacteria | Gammaproteobacteria | 0            | 0             | 0            | 0             |
| seq1519 | Proteobacteria | Gammaproteobacteria | 0            | 0             | 0            | 0             |
| seq1617 | Proteobacteria | Gammaproteobacteria | 0            | 0             | 0            | 0             |
| seq117  | Proteobacteria | Alphaproteobacteria | 0            | 0             | 78           | 0             |
| seq145  | Proteobacteria | Alphaproteobacteria | 0            | 0             | 0            | 0             |
| seq240  | Proteobacteria | Alphaproteobacteria | 0            | 0             | 0            | 0             |
| seq364  | Proteobacteria | Alphaproteobacteria | 0            | 0             | 0            | 0             |
|         | Proteobacteria | <b>TOTAL</b>        | <b>0</b>     | <b>0</b>      | <b>1835</b>  | <b>65</b>     |
|         |                |                     |              |               |              |               |
| seq1662 | Spirochaetes   | Spirochaetia        | 0            | 0             | 0            | 0             |
|         |                |                     |              |               |              |               |
| seq694  | Synergistetes  | Synergistia         | 0            | 0             | 0            | 0             |
| seq1306 | Synergistetes  | Synergistia         | 0            | 0             | 0            | 0             |
| seq403  | Synergistetes  | Synergistia         | 0            | 0             | 0            | 0             |
| seq1608 | Synergistetes  | Synergistia         | 0            | 0             | 0            | 0             |
|         | Synergistetes  | <b>TOTAL</b>        | <b>0</b>     | <b>0</b>      | <b>0</b>     | <b>0</b>      |
|         |                |                     |              |               |              |               |
| seq182  | Tenericutes    | Mollicutes          | 0            | 0             | 0            | 0             |

Sequence Count Table

|         | Phylum         | Class               | Subject13WK0 | Subject13WK12 | Subject39WK0 | Subject39WK12 |
|---------|----------------|---------------------|--------------|---------------|--------------|---------------|
| seq932  | Proteobacteria | Deltaproteobacteria | 0            | 0             | 0            | 0             |
| seq934  | Proteobacteria | Deltaproteobacteria | 28           | 81            | 0            | 0             |
| seq1064 | Proteobacteria | Deltaproteobacteria | 0            | 0             | 0            | 0             |
| seq1203 | Proteobacteria | Deltaproteobacteria | 0            | 0             | 0            | 0             |
| seq1364 | Proteobacteria | Deltaproteobacteria | 0            | 0             | 0            | 0             |
| seq1147 | Proteobacteria | Deltaproteobacteria | 0            | 0             | 0            | 93            |
| seq1156 | Proteobacteria | Deltaproteobacteria | 0            | 0             | 0            | 0             |
| seq1692 | Proteobacteria | Deltaproteobacteria | 0            | 0             | 0            | 0             |
| seq72   | Proteobacteria | Gammaproteobacteria | 0            | 50            | 0            | 539           |
| seq110  | Proteobacteria | Gammaproteobacteria | 0            | 0             | 0            | 0             |
| seq427  | Proteobacteria | Gammaproteobacteria | 0            | 0             | 0            | 0             |
| seq1412 | Proteobacteria | Gammaproteobacteria | 0            | 40            | 0            | 0             |
| seq1674 | Proteobacteria | Alphaproteobacteria | 0            | 0             | 0            | 0             |
| seq333  | Proteobacteria | Gammaproteobacteria | 34           | 0             | 0            | 0             |
| seq1820 | Proteobacteria | Gammaproteobacteria | 7            | 0             | 0            | 0             |
| seq1519 | Proteobacteria | Gammaproteobacteria | 0            | 0             | 0            | 0             |
| seq1617 | Proteobacteria | Gammaproteobacteria | 0            | 5             | 0            | 0             |
| seq117  | Proteobacteria | Alphaproteobacteria | 45           | 990           | 0            | 0             |
| seq145  | Proteobacteria | Alphaproteobacteria | 0            | 0             | 0            | 0             |
| seq240  | Proteobacteria | Alphaproteobacteria | 0            | 0             | 0            | 0             |
| seq364  | Proteobacteria | Alphaproteobacteria | 0            | 0             | 0            | 0             |
|         | Proteobacteria | <b>TOTAL</b>        | <b>1812</b>  | <b>1905</b>   | <b>0</b>     | <b>2861</b>   |
|         |                |                     |              |               |              |               |
| seq1662 | Spirochaetes   | Spirochaetia        | 0            | 0             | 0            | 0             |
|         |                |                     |              |               |              |               |
| seq694  | Synergistetes  | Synergistia         | 13           | 42            | 0            | 0             |
| seq1306 | Synergistetes  | Synergistia         | 0            | 0             | 0            | 0             |
| seq403  | Synergistetes  | Synergistia         | 0            | 0             | 0            | 0             |
| seq1608 | Synergistetes  | Synergistia         | 0            | 0             | 0            | 0             |
|         | Synergistetes  | <b>TOTAL</b>        | <b>13</b>    | <b>42</b>     | <b>0</b>     | <b>0</b>      |
|         |                |                     |              |               |              |               |
| seq182  | Tenericutes    | Mollicutes          | 0            | 0             | 0            | 0             |

Sequence Count Table

|         | Phylum         | Class               | Subject26WK0 | Subject26WK12 | Subject14WK0 | Subject14WK12 |
|---------|----------------|---------------------|--------------|---------------|--------------|---------------|
| seq932  | Proteobacteria | Deltaproteobacteria | 0            | 0             | 0            | 0             |
| seq934  | Proteobacteria | Deltaproteobacteria | 0            | 10            | 0            | 0             |
| seq1064 | Proteobacteria | Deltaproteobacteria | 0            | 0             | 0            | 0             |
| seq1203 | Proteobacteria | Deltaproteobacteria | 0            | 0             | 0            | 0             |
| seq1364 | Proteobacteria | Deltaproteobacteria | 0            | 0             | 0            | 0             |
| seq1147 | Proteobacteria | Deltaproteobacteria | 0            | 0             | 0            | 0             |
| seq1156 | Proteobacteria | Deltaproteobacteria | 0            | 0             | 0            | 0             |
| seq1692 | Proteobacteria | Deltaproteobacteria | 0            | 0             | 0            | 0             |
| seq72   | Proteobacteria | Gammaproteobacteria | 43           | 0             | 455          | 1557          |
| seq110  | Proteobacteria | Gammaproteobacteria | 250          | 36            | 723          | 0             |
| seq427  | Proteobacteria | Gammaproteobacteria | 0            | 0             | 0            | 0             |
| seq1412 | Proteobacteria | Gammaproteobacteria | 0            | 0             | 0            | 0             |
| seq1674 | Proteobacteria | Alphaproteobacteria | 0            | 0             | 0            | 0             |
| seq333  | Proteobacteria | Gammaproteobacteria | 0            | 0             | 20           | 0             |
| seq1820 | Proteobacteria | Gammaproteobacteria | 0            | 0             | 0            | 0             |
| seq1519 | Proteobacteria | Gammaproteobacteria | 0            | 0             | 0            | 0             |
| seq1617 | Proteobacteria | Gammaproteobacteria | 0            | 0             | 0            | 0             |
| seq117  | Proteobacteria | Alphaproteobacteria | 888          | 479           | 0            | 0             |
| seq145  | Proteobacteria | Alphaproteobacteria | 0            | 0             | 0            | 0             |
| seq240  | Proteobacteria | Alphaproteobacteria | 0            | 0             | 0            | 0             |
| seq364  | Proteobacteria | Alphaproteobacteria | 0            | 0             | 0            | 0             |
|         | Proteobacteria | <b>TOTAL</b>        | <b>2780</b>  | <b>3628</b>   | <b>2448</b>  | <b>2191</b>   |
|         |                |                     |              |               |              |               |
| seq1662 | Spirochaetes   | Spirochaetia        | 0            | 0             | 0            | 0             |
|         |                |                     |              |               |              |               |
| seq694  | Synergistetes  | Synergistia         | 0            | 0             | 0            | 0             |
| seq1306 | Synergistetes  | Synergistia         | 0            | 0             | 0            | 0             |
| seq403  | Synergistetes  | Synergistia         | 0            | 0             | 0            | 0             |
| seq1608 | Synergistetes  | Synergistia         | 0            | 0             | 0            | 0             |
|         | Synergistetes  | <b>TOTAL</b>        | <b>0</b>     | <b>0</b>      | <b>0</b>     | <b>0</b>      |
|         |                |                     |              |               |              |               |
| seq182  | Tenericutes    | Mollicutes          | 0            | 0             | 0            | 0             |



Sequence Count Table

|         | Phylum         | Class               | Subject27WK0 | Subject27WK12 | Subject15WK0 | Subject15WK12 |
|---------|----------------|---------------------|--------------|---------------|--------------|---------------|
| seq932  | Proteobacteria | Deltaproteobacteria | 0            | 0             | 0            | 0             |
| seq934  | Proteobacteria | Deltaproteobacteria | 0            | 0             | 0            | 0             |
| seq1064 | Proteobacteria | Deltaproteobacteria | 0            | 0             | 0            | 0             |
| seq1203 | Proteobacteria | Deltaproteobacteria | 0            | 0             | 0            | 0             |
| seq1364 | Proteobacteria | Deltaproteobacteria | 0            | 0             | 0            | 0             |
| seq1147 | Proteobacteria | Deltaproteobacteria | 0            | 0             | 0            | 0             |
| seq1156 | Proteobacteria | Deltaproteobacteria | 0            | 0             | 0            | 0             |
| seq1692 | Proteobacteria | Deltaproteobacteria | 0            | 0             | 0            | 0             |
| seq72   | Proteobacteria | Gammaproteobacteria | 230          | 0             | 0            | 57            |
| seq110  | Proteobacteria | Gammaproteobacteria | 2681         | 7332          | 0            | 0             |
| seq427  | Proteobacteria | Gammaproteobacteria | 0            | 955           | 0            | 0             |
| seq1412 | Proteobacteria | Gammaproteobacteria | 0            | 0             | 0            | 0             |
| seq1674 | Proteobacteria | Alphaproteobacteria | 0            | 0             | 0            | 0             |
| seq333  | Proteobacteria | Gammaproteobacteria | 16           | 64            | 60           | 48            |
| seq1820 | Proteobacteria | Gammaproteobacteria | 0            | 0             | 0            | 0             |
| seq1519 | Proteobacteria | Gammaproteobacteria | 0            | 0             | 0            | 0             |
| seq1617 | Proteobacteria | Gammaproteobacteria | 0            | 0             | 0            | 0             |
| seq117  | Proteobacteria | Alphaproteobacteria | 0            | 0             | 603          | 305           |
| seq145  | Proteobacteria | Alphaproteobacteria | 0            | 0             | 0            | 0             |
| seq240  | Proteobacteria | Alphaproteobacteria | 0            | 0             | 0            | 0             |
| seq364  | Proteobacteria | Alphaproteobacteria | 0            | 0             | 0            | 0             |
|         | Proteobacteria | <b>TOTAL</b>        | 4600         | 10236         | 2791         | 2726          |
|         |                |                     |              |               |              |               |
| seq1662 | Spirochaetes   | Spirochaetia        | 0            | 0             | 0            | 0             |
|         |                |                     |              |               |              |               |
| seq694  | Synergistetes  | Synergistia         | 0            | 0             | 0            | 0             |
| seq1306 | Synergistetes  | Synergistia         | 0            | 0             | 0            | 0             |
| seq403  | Synergistetes  | Synergistia         | 0            | 0             | 0            | 0             |
| seq1608 | Synergistetes  | Synergistia         | 0            | 0             | 0            | 0             |
|         | Synergistetes  | <b>TOTAL</b>        | 0            | 0             | 0            | 0             |
|         |                |                     |              |               |              |               |
| seq182  | Tenericutes    | Mollicutes          | 0            | 0             | 0            | 0             |

Sequence Count Table

|                | <b>Phylum</b>         | <b>Class</b>        | <b>Δ</b> |  |  |  |
|----------------|-----------------------|---------------------|----------|--|--|--|
| <b>seq932</b>  | Proteobacteria        | Deltaproteobacteria |          |  |  |  |
| <b>seq934</b>  | Proteobacteria        | Deltaproteobacteria |          |  |  |  |
| <b>seq1064</b> | Proteobacteria        | Deltaproteobacteria |          |  |  |  |
| <b>seq1203</b> | Proteobacteria        | Deltaproteobacteria |          |  |  |  |
| <b>seq1364</b> | Proteobacteria        | Deltaproteobacteria |          |  |  |  |
| <b>seq1147</b> | Proteobacteria        | Deltaproteobacteria |          |  |  |  |
| <b>seq1156</b> | Proteobacteria        | Deltaproteobacteria |          |  |  |  |
| <b>seq1692</b> | Proteobacteria        | Deltaproteobacteria |          |  |  |  |
| <b>seq72</b>   | Proteobacteria        | Gammaproteobacteria |          |  |  |  |
| <b>seq110</b>  | Proteobacteria        | Gammaproteobacteria |          |  |  |  |
| <b>seq427</b>  | Proteobacteria        | Gammaproteobacteria |          |  |  |  |
| <b>seq1412</b> | Proteobacteria        | Gammaproteobacteria |          |  |  |  |
| <b>seq1674</b> | Proteobacteria        | Alphaproteobacteria |          |  |  |  |
| <b>seq333</b>  | Proteobacteria        | Gammaproteobacteria |          |  |  |  |
| <b>seq1820</b> | Proteobacteria        | Gammaproteobacteria |          |  |  |  |
| <b>seq1519</b> | Proteobacteria        | Gammaproteobacteria |          |  |  |  |
| <b>seq1617</b> | Proteobacteria        | Gammaproteobacteria |          |  |  |  |
| <b>seq117</b>  | Proteobacteria        | Alphaproteobacteria |          |  |  |  |
| <b>seq145</b>  | Proteobacteria        | Alphaproteobacteria |          |  |  |  |
| <b>seq240</b>  | Proteobacteria        | Alphaproteobacteria |          |  |  |  |
| <b>seq364</b>  | Proteobacteria        | Alphaproteobacteria |          |  |  |  |
|                | <b>Proteobacteria</b> | <b>TOTAL</b>        |          |  |  |  |
|                |                       |                     |          |  |  |  |
| <b>seq1662</b> | <b>Spirochaetes</b>   | <b>Spirochaetia</b> |          |  |  |  |
|                |                       |                     |          |  |  |  |
| <b>seq694</b>  | Synergistetes         | Synergistia         |          |  |  |  |
| <b>seq1306</b> | Synergistetes         | Synergistia         |          |  |  |  |
| <b>seq403</b>  | Synergistetes         | Synergistia         |          |  |  |  |
| <b>seq1608</b> | Synergistetes         | Synergistia         |          |  |  |  |
|                | <b>Synergistetes</b>  | <b>TOTAL</b>        |          |  |  |  |
|                |                       |                     |          |  |  |  |
| <b>seq182</b>  | Tenericutes           | Mollicutes          |          |  |  |  |

Sequence Count Table

|                | <b>Phylum</b>          | <b>Class</b>     | <b>Order</b>       | <b>Family</b>    |
|----------------|------------------------|------------------|--------------------|------------------|
| <b>seq430</b>  | Tenericutes            | Mollicutes       | Mollicutes_RF39    |                  |
| <b>seq539</b>  | Tenericutes            | Mollicutes       | Mollicutes_RF39    |                  |
| <b>seq688</b>  | Tenericutes            | Mollicutes       | Mollicutes_RF39    |                  |
| <b>seq823</b>  | Tenericutes            | Mollicutes       | Mollicutes_RF39    |                  |
| <b>seq877</b>  | Tenericutes            | Mollicutes       | Mollicutes_RF39    |                  |
| <b>seq903</b>  | Tenericutes            | Mollicutes       | Mollicutes_RF39    |                  |
| <b>seq1041</b> | Tenericutes            | Mollicutes       | Izimaplasmatales   |                  |
| <b>seq1066</b> | Tenericutes            | Mollicutes       | Izimaplasmatales   |                  |
| <b>seq1145</b> | Tenericutes            | Mollicutes       | Mollicutes_RF39    |                  |
| <b>seq1161</b> | Tenericutes            | Mollicutes       | Mollicutes_RF39    |                  |
| <b>seq1226</b> | Tenericutes            | Mollicutes       | Mollicutes_RF39    |                  |
| <b>seq1290</b> | Tenericutes            | Mollicutes       | Mollicutes_RF39    |                  |
| <b>seq1357</b> | Tenericutes            | Mollicutes       | Mollicutes_RF39    |                  |
| <b>seq1395</b> | Tenericutes            | Mollicutes       | Mollicutes_RF39    |                  |
| <b>seq1517</b> | Tenericutes            | Mollicutes       | Mollicutes_RF39    |                  |
| <b>seq1551</b> | Tenericutes            | Mollicutes       | Mollicutes_RF39    |                  |
| <b>seq1592</b> | Tenericutes            | Mollicutes       | Mollicutes_RF39    |                  |
| <b>seq1606</b> | Tenericutes            | Mollicutes       | Mollicutes_RF39    |                  |
| <b>seq1618</b> | Tenericutes            | Mollicutes       | Mollicutes_RF39    |                  |
|                | <b>Tenericutes</b>     | <b>TOTAL</b>     |                    |                  |
|                |                        |                  |                    |                  |
| <b>seq83</b>   | Verrucomicrobia        | Verrucomicrobiae | Verrucomicrobiales | Akkermansiaceae  |
| <b>seq103</b>  | Verrucomicrobia        | Verrucomicrobiae | Verrucomicrobiales | Akkermansiaceae  |
| <b>seq105</b>  | Verrucomicrobia        | Verrucomicrobiae | Verrucomicrobiales | Akkermansiaceae  |
| <b>seq1087</b> | Verrucomicrobia        | Verrucomicrobiae | Opituales          | Puniceicoccaceae |
| <b>seq727</b>  | Verrucomicrobia        | Verrucomicrobiae | Opituales          | Puniceicoccaceae |
|                | <b>Verrucomicrobia</b> | <b>TOTAL</b>     |                    |                  |
|                |                        |                  |                    |                  |
| <b>seq258</b>  |                        |                  |                    |                  |
| <b>seq429</b>  |                        |                  |                    |                  |
| <b>seq524</b>  |                        |                  |                    |                  |
| <b>seq780</b>  |                        |                  |                    |                  |

Sequence Count Table

|                | <b>Phylum</b>          | <b>Class</b>     | <b>Genus</b> | <b>Species</b> |
|----------------|------------------------|------------------|--------------|----------------|
| <b>seq430</b>  | Tenericutes            | Mollicutes       |              |                |
| <b>seq539</b>  | Tenericutes            | Mollicutes       |              |                |
| <b>seq688</b>  | Tenericutes            | Mollicutes       |              |                |
| <b>seq823</b>  | Tenericutes            | Mollicutes       |              |                |
| <b>seq877</b>  | Tenericutes            | Mollicutes       |              |                |
| <b>seq903</b>  | Tenericutes            | Mollicutes       |              |                |
| <b>seq1041</b> | Tenericutes            | Mollicutes       |              |                |
| <b>seq1066</b> | Tenericutes            | Mollicutes       |              |                |
| <b>seq1145</b> | Tenericutes            | Mollicutes       |              |                |
| <b>seq1161</b> | Tenericutes            | Mollicutes       |              |                |
| <b>seq1226</b> | Tenericutes            | Mollicutes       |              |                |
| <b>seq1290</b> | Tenericutes            | Mollicutes       |              |                |
| <b>seq1357</b> | Tenericutes            | Mollicutes       |              |                |
| <b>seq1395</b> | Tenericutes            | Mollicutes       |              |                |
| <b>seq1517</b> | Tenericutes            | Mollicutes       |              |                |
| <b>seq1551</b> | Tenericutes            | Mollicutes       |              |                |
| <b>seq1592</b> | Tenericutes            | Mollicutes       |              |                |
| <b>seq1606</b> | Tenericutes            | Mollicutes       |              |                |
| <b>seq1618</b> | Tenericutes            | Mollicutes       |              |                |
|                | <b>Tenericutes</b>     | <b>TOTAL</b>     |              |                |
|                |                        |                  |              |                |
| <b>seq83</b>   | Verrucomicrobia        | Verrucomicrobiae | Akkermansia  |                |
| <b>seq103</b>  | Verrucomicrobia        | Verrucomicrobiae | Akkermansia  | muciniphila    |
| <b>seq105</b>  | Verrucomicrobia        | Verrucomicrobiae | Akkermansia  | muciniphila    |
| <b>seq1087</b> | Verrucomicrobia        | Verrucomicrobiae | Cerasicoccus |                |
| <b>seq727</b>  | Verrucomicrobia        | Verrucomicrobiae |              |                |
|                | <b>Verrucomicrobia</b> | <b>TOTAL</b>     |              |                |
|                |                        |                  |              |                |
| <b>seq258</b>  |                        |                  |              |                |
| <b>seq429</b>  |                        |                  |              |                |
| <b>seq524</b>  |                        |                  |              |                |
| <b>seq780</b>  |                        |                  |              |                |

Sequence Count Table

|         | Phylum                 | Class            | Subject34WK0 | Subject34WK12 | Subject16WK0 | Subject16WK12 |
|---------|------------------------|------------------|--------------|---------------|--------------|---------------|
| seq430  | Tenericutes            | Mollicutes       | 0            | 0             | 0            | 0             |
| seq539  | Tenericutes            | Mollicutes       | 0            | 0             | 0            | 0             |
| seq688  | Tenericutes            | Mollicutes       | 0            | 0             | 0            | 0             |
| seq823  | Tenericutes            | Mollicutes       | 0            | 0             | 0            | 0             |
| seq877  | Tenericutes            | Mollicutes       | 0            | 0             | 0            | 0             |
| seq903  | Tenericutes            | Mollicutes       | 0            | 0             | 0            | 0             |
| seq1041 | Tenericutes            | Mollicutes       | 0            | 0             | 0            | 0             |
| seq1066 | Tenericutes            | Mollicutes       | 0            | 0             | 0            | 0             |
| seq1145 | Tenericutes            | Mollicutes       | 0            | 0             | 0            | 0             |
| seq1161 | Tenericutes            | Mollicutes       | 0            | 0             | 0            | 0             |
| seq1226 | Tenericutes            | Mollicutes       | 0            | 0             | 0            | 0             |
| seq1290 | Tenericutes            | Mollicutes       | 0            | 0             | 0            | 0             |
| seq1357 | Tenericutes            | Mollicutes       | 0            | 0             | 0            | 0             |
| seq1395 | Tenericutes            | Mollicutes       | 0            | 0             | 0            | 0             |
| seq1517 | Tenericutes            | Mollicutes       | 0            | 0             | 0            | 0             |
| seq1551 | Tenericutes            | Mollicutes       | 0            | 0             | 0            | 0             |
| seq1592 | Tenericutes            | Mollicutes       | 0            | 0             | 0            | 0             |
| seq1606 | Tenericutes            | Mollicutes       | 0            | 0             | 0            | 0             |
| seq1618 | Tenericutes            | Mollicutes       | 0            | 0             | 0            | 0             |
|         | <b>Tenericutes</b>     | <b>TOTAL</b>     | <b>0</b>     | <b>0</b>      | <b>0</b>     | <b>0</b>      |
|         |                        |                  |              |               |              |               |
| seq83   | Verrucomicrobia        | Verrucomicrobiae | 0            | 0             | 0            | 0             |
| seq103  | Verrucomicrobia        | Verrucomicrobiae | 11           | 1363          | 0            | 0             |
| seq105  | Verrucomicrobia        | Verrucomicrobiae | 0            | 0             | 12           | 395           |
| seq1087 | Verrucomicrobia        | Verrucomicrobiae | 0            | 0             | 0            | 0             |
| seq727  | Verrucomicrobia        | Verrucomicrobiae | 0            | 0             | 0            | 0             |
|         | <b>Verrucomicrobia</b> | <b>TOTAL</b>     | <b>11</b>    | <b>1363</b>   | <b>12</b>    | <b>395</b>    |
|         |                        |                  |              |               |              |               |
| seq258  |                        |                  | 0            | 0             | 0            | 0             |
| seq429  |                        |                  | 0            | 0             | 0            | 0             |
| seq524  |                        |                  | 0            | 0             | 6            | 24            |
| seq780  |                        |                  | 0            | 0             | 0            | 0             |

Sequence Count Table

|         | Phylum                 | Class            | Subject17WK0 | Subject17WK12 | Subject1WK0 | Subject1WK12 |
|---------|------------------------|------------------|--------------|---------------|-------------|--------------|
| seq430  | Tenericutes            | Mollicutes       | 0            | 0             | 0           | 0            |
| seq539  | Tenericutes            | Mollicutes       | 0            | 0             | 0           | 0            |
| seq688  | Tenericutes            | Mollicutes       | 0            | 0             | 0           | 0            |
| seq823  | Tenericutes            | Mollicutes       | 0            | 0             | 0           | 0            |
| seq877  | Tenericutes            | Mollicutes       | 0            | 0             | 0           | 0            |
| seq903  | Tenericutes            | Mollicutes       | 0            | 0             | 0           | 0            |
| seq1041 | Tenericutes            | Mollicutes       | 0            | 0             | 0           | 0            |
| seq1066 | Tenericutes            | Mollicutes       | 0            | 0             | 0           | 0            |
| seq1145 | Tenericutes            | Mollicutes       | 0            | 0             | 0           | 0            |
| seq1161 | Tenericutes            | Mollicutes       | 0            | 0             | 0           | 0            |
| seq1226 | Tenericutes            | Mollicutes       | 0            | 0             | 0           | 0            |
| seq1290 | Tenericutes            | Mollicutes       | 0            | 0             | 0           | 0            |
| seq1357 | Tenericutes            | Mollicutes       | 0            | 0             | 0           | 0            |
| seq1395 | Tenericutes            | Mollicutes       | 0            | 0             | 0           | 0            |
| seq1517 | Tenericutes            | Mollicutes       | 0            | 0             | 0           | 0            |
| seq1551 | Tenericutes            | Mollicutes       | 0            | 0             | 0           | 0            |
| seq1592 | Tenericutes            | Mollicutes       | 0            | 0             | 0           | 0            |
| seq1606 | Tenericutes            | Mollicutes       | 0            | 0             | 0           | 0            |
| seq1618 | Tenericutes            | Mollicutes       | 0            | 0             | 0           | 0            |
|         | <b>Tenericutes</b>     | <b>TOTAL</b>     | <b>39</b>    | <b>0</b>      | <b>0</b>    | <b>0</b>     |
|         |                        |                  |              |               |             |              |
| seq83   | Verrucomicrobia        | Verrucomicrobiae | 0            | 0             | 4524        | 6083         |
| seq103  | Verrucomicrobia        | Verrucomicrobiae | 0            | 0             | 0           | 0            |
| seq105  | Verrucomicrobia        | Verrucomicrobiae | 0            | 0             | 0           | 0            |
| seq1087 | Verrucomicrobia        | Verrucomicrobiae | 0            | 0             | 0           | 0            |
| seq727  | Verrucomicrobia        | Verrucomicrobiae | 0            | 0             | 0           | 0            |
|         | <b>Verrucomicrobia</b> | <b>TOTAL</b>     | <b>0</b>     | <b>0</b>      | <b>4524</b> | <b>6083</b>  |
|         |                        |                  |              |               |             |              |
| seq258  |                        |                  | 0            | 0             | 0           | 0            |
| seq429  |                        |                  | 18           | 13            | 16          | 15           |
| seq524  |                        |                  | 39           | 35            | 0           | 0            |
| seq780  |                        |                  | 0            | 0             | 0           | 0            |

Sequence Count Table

|         | Phylum                 | Class            | Subject2WK0 | Subject2WK12 | Subject3WK0 | Subject3WK12 |
|---------|------------------------|------------------|-------------|--------------|-------------|--------------|
| seq430  | Tenericutes            | Mollicutes       | 0           | 0            | 0           | 0            |
| seq539  | Tenericutes            | Mollicutes       | 0           | 0            | 0           | 0            |
| seq688  | Tenericutes            | Mollicutes       | 0           | 0            | 0           | 0            |
| seq823  | Tenericutes            | Mollicutes       | 0           | 0            | 0           | 0            |
| seq877  | Tenericutes            | Mollicutes       | 0           | 0            | 0           | 0            |
| seq903  | Tenericutes            | Mollicutes       | 0           | 0            | 0           | 0            |
| seq1041 | Tenericutes            | Mollicutes       | 0           | 0            | 0           | 0            |
| seq1066 | Tenericutes            | Mollicutes       | 0           | 0            | 0           | 0            |
| seq1145 | Tenericutes            | Mollicutes       | 0           | 0            | 0           | 0            |
| seq1161 | Tenericutes            | Mollicutes       | 0           | 0            | 0           | 0            |
| seq1226 | Tenericutes            | Mollicutes       | 0           | 0            | 0           | 0            |
| seq1290 | Tenericutes            | Mollicutes       | 0           | 0            | 0           | 0            |
| seq1357 | Tenericutes            | Mollicutes       | 0           | 0            | 0           | 0            |
| seq1395 | Tenericutes            | Mollicutes       | 0           | 0            | 0           | 0            |
| seq1517 | Tenericutes            | Mollicutes       | 0           | 0            | 0           | 0            |
| seq1551 | Tenericutes            | Mollicutes       | 0           | 0            | 0           | 0            |
| seq1592 | Tenericutes            | Mollicutes       | 0           | 0            | 0           | 0            |
| seq1606 | Tenericutes            | Mollicutes       | 0           | 0            | 0           | 0            |
| seq1618 | Tenericutes            | Mollicutes       | 0           | 0            | 0           | 0            |
|         | <b>Tenericutes</b>     | <b>TOTAL</b>     | <b>0</b>    | <b>0</b>     | <b>0</b>    | <b>0</b>     |
|         |                        |                  |             |              |             |              |
| seq83   | Verrucomicrobia        | Verrucomicrobiae | 0           | 0            | 0           | 0            |
| seq103  | Verrucomicrobia        | Verrucomicrobiae | 0           | 0            | 0           | 0            |
| seq105  | Verrucomicrobia        | Verrucomicrobiae | 0           | 0            | 0           | 0            |
| seq1087 | Verrucomicrobia        | Verrucomicrobiae | 0           | 0            | 0           | 0            |
| seq727  | Verrucomicrobia        | Verrucomicrobiae | 0           | 0            | 0           | 0            |
|         | <b>Verrucomicrobia</b> | <b>TOTAL</b>     | <b>0</b>    | <b>0</b>     | <b>0</b>    | <b>0</b>     |
|         |                        |                  |             |              |             |              |
| seq258  |                        |                  | 0           | 0            | 0           | 0            |
| seq429  |                        |                  | 0           | 0            | 0           | 0            |
| seq524  |                        |                  | 0           | 0            | 0           | 0            |
| seq780  |                        |                  | 0           | 0            | 0           | 0            |

Sequence Count Table

|         | Phylum                 | Class            | Subject4WK0 | Subject4WK12 | Subject5WK0 | Subject5WK12 |
|---------|------------------------|------------------|-------------|--------------|-------------|--------------|
| seq430  | Tenericutes            | Mollicutes       | 0           | 0            | 0           | 0            |
| seq539  | Tenericutes            | Mollicutes       | 0           | 0            | 0           | 0            |
| seq688  | Tenericutes            | Mollicutes       | 0           | 0            | 0           | 0            |
| seq823  | Tenericutes            | Mollicutes       | 0           | 0            | 0           | 0            |
| seq877  | Tenericutes            | Mollicutes       | 0           | 0            | 0           | 0            |
| seq903  | Tenericutes            | Mollicutes       | 0           | 0            | 0           | 0            |
| seq1041 | Tenericutes            | Mollicutes       | 0           | 0            | 0           | 0            |
| seq1066 | Tenericutes            | Mollicutes       | 0           | 0            | 0           | 0            |
| seq1145 | Tenericutes            | Mollicutes       | 0           | 0            | 0           | 0            |
| seq1161 | Tenericutes            | Mollicutes       | 0           | 0            | 0           | 0            |
| seq1226 | Tenericutes            | Mollicutes       | 0           | 0            | 0           | 0            |
| seq1290 | Tenericutes            | Mollicutes       | 0           | 0            | 0           | 0            |
| seq1357 | Tenericutes            | Mollicutes       | 0           | 0            | 0           | 0            |
| seq1395 | Tenericutes            | Mollicutes       | 0           | 0            | 0           | 0            |
| seq1517 | Tenericutes            | Mollicutes       | 0           | 0            | 0           | 0            |
| seq1551 | Tenericutes            | Mollicutes       | 0           | 0            | 0           | 0            |
| seq1592 | Tenericutes            | Mollicutes       | 0           | 0            | 0           | 0            |
| seq1606 | Tenericutes            | Mollicutes       | 0           | 0            | 0           | 0            |
| seq1618 | Tenericutes            | Mollicutes       | 0           | 0            | 0           | 0            |
|         | <b>Tenericutes</b>     | <b>TOTAL</b>     | <b>0</b>    | <b>0</b>     | <b>0</b>    | <b>0</b>     |
|         |                        |                  |             |              |             |              |
| seq83   | Verrucomicrobia        | Verrucomicrobiae | 397         | 510          | 0           | 0            |
| seq103  | Verrucomicrobia        | Verrucomicrobiae | 0           | 0            | 0           | 0            |
| seq105  | Verrucomicrobia        | Verrucomicrobiae | 0           | 0            | 0           | 0            |
| seq1087 | Verrucomicrobia        | Verrucomicrobiae | 0           | 0            | 0           | 0            |
| seq727  | Verrucomicrobia        | Verrucomicrobiae | 0           | 0            | 0           | 0            |
|         | <b>Verrucomicrobia</b> | <b>TOTAL</b>     | <b>397</b>  | <b>510</b>   | <b>0</b>    | <b>0</b>     |
|         |                        |                  |             |              |             |              |
| seq258  |                        |                  | 0           | 0            | 0           | 0            |
| seq429  |                        |                  | 25          | 29           | 0           | 0            |
| seq524  |                        |                  | 29          | 112          | 0           | 0            |
| seq780  |                        |                  | 0           | 0            | 0           | 0            |



Sequence Count Table

|         | Phylum                 | Class            | Subject6WK0 | Subject6WK12 | Subject18WK0 | Subject18WK12 |
|---------|------------------------|------------------|-------------|--------------|--------------|---------------|
| seq430  | Tenericutes            | Mollicutes       | 0           | 337          | 0            | 0             |
| seq539  | Tenericutes            | Mollicutes       | 109         | 479          | 0            | 0             |
| seq688  | Tenericutes            | Mollicutes       | 114         | 0            | 0            | 0             |
| seq823  | Tenericutes            | Mollicutes       | 73          | 0            | 0            | 0             |
| seq877  | Tenericutes            | Mollicutes       | 210         | 0            | 0            | 0             |
| seq903  | Tenericutes            | Mollicutes       | 0           | 0            | 0            | 0             |
| seq1041 | Tenericutes            | Mollicutes       | 0           | 0            | 0            | 0             |
| seq1066 | Tenericutes            | Mollicutes       | 0           | 0            | 0            | 0             |
| seq1145 | Tenericutes            | Mollicutes       | 93          | 0            | 0            | 0             |
| seq1161 | Tenericutes            | Mollicutes       | 0           | 0            | 0            | 0             |
| seq1226 | Tenericutes            | Mollicutes       | 72          | 0            | 0            | 0             |
| seq1290 | Tenericutes            | Mollicutes       | 41          | 18           | 0            | 0             |
| seq1357 | Tenericutes            | Mollicutes       | 0           | 0            | 0            | 0             |
| seq1395 | Tenericutes            | Mollicutes       | 0           | 0            | 0            | 0             |
| seq1517 | Tenericutes            | Mollicutes       | 0           | 0            | 0            | 0             |
| seq1551 | Tenericutes            | Mollicutes       | 0           | 0            | 0            | 0             |
| seq1592 | Tenericutes            | Mollicutes       | 0           | 0            | 0            | 0             |
| seq1606 | Tenericutes            | Mollicutes       | 0           | 0            | 0            | 0             |
| seq1618 | Tenericutes            | Mollicutes       | 0           | 0            | 0            | 0             |
|         | <b>Tenericutes</b>     | <b>TOTAL</b>     | <b>1635</b> | <b>1270</b>  | <b>0</b>     | <b>0</b>      |
|         |                        |                  |             |              |              |               |
| seq83   | Verrucomicrobia        | Verrucomicrobiae | 0           | 0            | 0            | 0             |
| seq103  | Verrucomicrobia        | Verrucomicrobiae | 0           | 0            | 4456         | 0             |
| seq105  | Verrucomicrobia        | Verrucomicrobiae | 4069        | 3631         | 0            | 0             |
| seq1087 | Verrucomicrobia        | Verrucomicrobiae | 0           | 0            | 0            | 0             |
| seq727  | Verrucomicrobia        | Verrucomicrobiae | 0           | 0            | 0            | 0             |
|         | <b>Verrucomicrobia</b> | <b>TOTAL</b>     | <b>4069</b> | <b>3631</b>  | <b>4456</b>  | <b>0</b>      |
|         |                        |                  |             |              |              |               |
| seq258  |                        |                  | 0           | 0            | 0            | 0             |
| seq429  |                        |                  | 41          | 49           | 164          | 66            |
| seq524  |                        |                  | 35          | 117          | 29           | 41            |
| seq780  |                        |                  | 0           | 0            | 0            | 0             |

Sequence Count Table

|         | Phylum                 | Class            | Subject19WK0 | Subject19WK12 | Subject20WK0 | Subject20WK12 |
|---------|------------------------|------------------|--------------|---------------|--------------|---------------|
| seq430  | Tenericutes            | Mollicutes       | 0            | 0             | 19           | 20            |
| seq539  | Tenericutes            | Mollicutes       | 0            | 0             | 12           | 61            |
| seq688  | Tenericutes            | Mollicutes       | 0            | 0             | 0            | 0             |
| seq823  | Tenericutes            | Mollicutes       | 0            | 0             | 0            | 0             |
| seq877  | Tenericutes            | Mollicutes       | 0            | 0             | 0            | 0             |
| seq903  | Tenericutes            | Mollicutes       | 0            | 0             | 0            | 0             |
| seq1041 | Tenericutes            | Mollicutes       | 0            | 0             | 0            | 0             |
| seq1066 | Tenericutes            | Mollicutes       | 0            | 0             | 116          | 0             |
| seq1145 | Tenericutes            | Mollicutes       | 0            | 0             | 0            | 0             |
| seq1161 | Tenericutes            | Mollicutes       | 0            | 0             | 33           | 57            |
| seq1226 | Tenericutes            | Mollicutes       | 0            | 0             | 0            | 0             |
| seq1290 | Tenericutes            | Mollicutes       | 0            | 0             | 0            | 0             |
| seq1357 | Tenericutes            | Mollicutes       | 0            | 0             | 16           | 31            |
| seq1395 | Tenericutes            | Mollicutes       | 0            | 0             | 42           | 0             |
| seq1517 | Tenericutes            | Mollicutes       | 0            | 0             | 0            | 0             |
| seq1551 | Tenericutes            | Mollicutes       | 0            | 0             | 0            | 0             |
| seq1592 | Tenericutes            | Mollicutes       | 0            | 0             | 0            | 20            |
| seq1606 | Tenericutes            | Mollicutes       | 0            | 0             | 0            | 19            |
| seq1618 | Tenericutes            | Mollicutes       | 0            | 0             | 18           | 0             |
|         | <b>Tenericutes</b>     | <b>TOTAL</b>     | <b>0</b>     | <b>0</b>      | <b>256</b>   | <b>208</b>    |
|         |                        |                  |              |               |              |               |
| seq83   | Verrucomicrobia        | Verrucomicrobiae | 0            | 0             | 0            | 0             |
| seq103  | Verrucomicrobia        | Verrucomicrobiae | 0            | 0             | 0            | 0             |
| seq105  | Verrucomicrobia        | Verrucomicrobiae | 0            | 0             | 0            | 683           |
| seq1087 | Verrucomicrobia        | Verrucomicrobiae | 0            | 0             | 109          | 0             |
| seq727  | Verrucomicrobia        | Verrucomicrobiae | 0            | 0             | 0            | 0             |
|         | <b>Verrucomicrobia</b> | <b>TOTAL</b>     | <b>0</b>     | <b>0</b>      | <b>109</b>   | <b>683</b>    |
|         |                        |                  |              |               |              |               |
| seq258  |                        |                  | 0            | 0             | 0            | 0             |
| seq429  |                        |                  | 24           | 48            | 3            | 6             |
| seq524  |                        |                  | 0            | 0             | 0            | 0             |
| seq780  |                        |                  | 0            | 0             | 272          | 14            |

Sequence Count Table

|         | Phylum                 | Class            | Subject7WK0 | Subject7WK12 | Subject21WK0 | Subject21WK12 |
|---------|------------------------|------------------|-------------|--------------|--------------|---------------|
| seq430  | Tenericutes            | Mollicutes       | 0           | 0            | 0            | 0             |
| seq539  | Tenericutes            | Mollicutes       | 0           | 0            | 0            | 0             |
| seq688  | Tenericutes            | Mollicutes       | 0           | 0            | 0            | 0             |
| seq823  | Tenericutes            | Mollicutes       | 0           | 0            | 0            | 0             |
| seq877  | Tenericutes            | Mollicutes       | 0           | 0            | 0            | 0             |
| seq903  | Tenericutes            | Mollicutes       | 0           | 0            | 0            | 0             |
| seq1041 | Tenericutes            | Mollicutes       | 0           | 0            | 0            | 0             |
| seq1066 | Tenericutes            | Mollicutes       | 0           | 0            | 0            | 0             |
| seq1145 | Tenericutes            | Mollicutes       | 0           | 0            | 0            | 0             |
| seq1161 | Tenericutes            | Mollicutes       | 0           | 0            | 0            | 0             |
| seq1226 | Tenericutes            | Mollicutes       | 0           | 0            | 0            | 0             |
| seq1290 | Tenericutes            | Mollicutes       | 0           | 0            | 0            | 0             |
| seq1357 | Tenericutes            | Mollicutes       | 0           | 0            | 0            | 0             |
| seq1395 | Tenericutes            | Mollicutes       | 0           | 0            | 0            | 0             |
| seq1517 | Tenericutes            | Mollicutes       | 0           | 0            | 0            | 0             |
| seq1551 | Tenericutes            | Mollicutes       | 0           | 0            | 0            | 0             |
| seq1592 | Tenericutes            | Mollicutes       | 0           | 0            | 0            | 0             |
| seq1606 | Tenericutes            | Mollicutes       | 0           | 0            | 0            | 0             |
| seq1618 | Tenericutes            | Mollicutes       | 0           | 0            | 0            | 0             |
|         | <b>Tenericutes</b>     | <b>TOTAL</b>     | <b>0</b>    | <b>0</b>     | <b>0</b>     | <b>0</b>      |
|         |                        |                  |             |              |              |               |
| seq83   | Verrucomicrobia        | Verrucomicrobiae | 0           | 0            | 0            | 0             |
| seq103  | Verrucomicrobia        | Verrucomicrobiae | 0           | 0            | 0            | 0             |
| seq105  | Verrucomicrobia        | Verrucomicrobiae | 0           | 0            | 0            | 0             |
| seq1087 | Verrucomicrobia        | Verrucomicrobiae | 0           | 0            | 0            | 0             |
| seq727  | Verrucomicrobia        | Verrucomicrobiae | 0           | 0            | 0            | 0             |
|         | <b>Verrucomicrobia</b> | <b>TOTAL</b>     | <b>0</b>    | <b>0</b>     | <b>0</b>     | <b>0</b>      |
|         |                        |                  |             |              |              |               |
| seq258  |                        |                  | 0           | 0            | 0            | 0             |
| seq429  |                        |                  | 179         | 24           | 0            | 0             |
| seq524  |                        |                  | 0           | 0            | 0            | 56            |
| seq780  |                        |                  | 0           | 0            | 0            | 0             |

Sequence Count Table

|         | Phylum                 | Class            | Subject8WK0 | Subject8WK12 | Subject9WK0 | Subject9WK12 |
|---------|------------------------|------------------|-------------|--------------|-------------|--------------|
| seq430  | Tenericutes            | Mollicutes       | 0           | 0            | 0           | 0            |
| seq539  | Tenericutes            | Mollicutes       | 0           | 0            | 0           | 0            |
| seq688  | Tenericutes            | Mollicutes       | 0           | 0            | 0           | 0            |
| seq823  | Tenericutes            | Mollicutes       | 0           | 0            | 0           | 0            |
| seq877  | Tenericutes            | Mollicutes       | 0           | 0            | 0           | 0            |
| seq903  | Tenericutes            | Mollicutes       | 0           | 0            | 0           | 0            |
| seq1041 | Tenericutes            | Mollicutes       | 0           | 0            | 0           | 0            |
| seq1066 | Tenericutes            | Mollicutes       | 0           | 0            | 0           | 0            |
| seq1145 | Tenericutes            | Mollicutes       | 0           | 0            | 0           | 0            |
| seq1161 | Tenericutes            | Mollicutes       | 0           | 0            | 0           | 0            |
| seq1226 | Tenericutes            | Mollicutes       | 0           | 0            | 0           | 0            |
| seq1290 | Tenericutes            | Mollicutes       | 0           | 0            | 0           | 0            |
| seq1357 | Tenericutes            | Mollicutes       | 0           | 0            | 0           | 0            |
| seq1395 | Tenericutes            | Mollicutes       | 0           | 0            | 0           | 0            |
| seq1517 | Tenericutes            | Mollicutes       | 0           | 0            | 0           | 0            |
| seq1551 | Tenericutes            | Mollicutes       | 0           | 0            | 0           | 0            |
| seq1592 | Tenericutes            | Mollicutes       | 0           | 0            | 0           | 0            |
| seq1606 | Tenericutes            | Mollicutes       | 0           | 0            | 0           | 0            |
| seq1618 | Tenericutes            | Mollicutes       | 0           | 0            | 0           | 0            |
|         | <b>Tenericutes</b>     | <b>TOTAL</b>     | <b>0</b>    | <b>0</b>     | <b>0</b>    | <b>0</b>     |
|         |                        |                  |             |              |             |              |
| seq83   | Verrucomicrobia        | Verrucomicrobiae | 0           | 0            | 0           | 0            |
| seq103  | Verrucomicrobia        | Verrucomicrobiae | 0           | 0            | 0           | 0            |
| seq105  | Verrucomicrobia        | Verrucomicrobiae | 0           | 0            | 0           | 0            |
| seq1087 | Verrucomicrobia        | Verrucomicrobiae | 0           | 0            | 0           | 0            |
| seq727  | Verrucomicrobia        | Verrucomicrobiae | 0           | 0            | 0           | 0            |
|         | <b>Verrucomicrobia</b> | <b>TOTAL</b>     | <b>0</b>    | <b>0</b>     | <b>0</b>    | <b>0</b>     |
|         |                        |                  |             |              |             |              |
| seq258  |                        |                  | 0           | 0            | 0           | 0            |
| seq429  |                        |                  | 54          | 27           | 18          | 0            |
| seq524  |                        |                  | 0           | 0            | 0           | 0            |
| seq780  |                        |                  | 0           | 0            | 0           | 0            |

Sequence Count Table

|         | Phylum                 | Class            | Subject10WK0 | Subject10WK12 | Subject22WK0 | Subject22WK12 |
|---------|------------------------|------------------|--------------|---------------|--------------|---------------|
| seq430  | Tenericutes            | Mollicutes       | 0            | 0             | 105          | 64            |
| seq539  | Tenericutes            | Mollicutes       | 0            | 0             | 0            | 0             |
| seq688  | Tenericutes            | Mollicutes       | 0            | 0             | 238          | 45            |
| seq823  | Tenericutes            | Mollicutes       | 0            | 0             | 147          | 31            |
| seq877  | Tenericutes            | Mollicutes       | 0            | 0             | 0            | 0             |
| seq903  | Tenericutes            | Mollicutes       | 0            | 0             | 143          | 50            |
| seq1041 | Tenericutes            | Mollicutes       | 0            | 0             | 0            | 0             |
| seq1066 | Tenericutes            | Mollicutes       | 0            | 0             | 0            | 0             |
| seq1145 | Tenericutes            | Mollicutes       | 0            | 0             | 0            | 0             |
| seq1161 | Tenericutes            | Mollicutes       | 0            | 0             | 0            | 0             |
| seq1226 | Tenericutes            | Mollicutes       | 0            | 0             | 0            | 0             |
| seq1290 | Tenericutes            | Mollicutes       | 0            | 0             | 0            | 0             |
| seq1357 | Tenericutes            | Mollicutes       | 0            | 0             | 0            | 0             |
| seq1395 | Tenericutes            | Mollicutes       | 0            | 0             | 0            | 0             |
| seq1517 | Tenericutes            | Mollicutes       | 0            | 0             | 0            | 27            |
| seq1551 | Tenericutes            | Mollicutes       | 0            | 0             | 0            | 0             |
| seq1592 | Tenericutes            | Mollicutes       | 0            | 0             | 0            | 0             |
| seq1606 | Tenericutes            | Mollicutes       | 0            | 0             | 0            | 0             |
| seq1618 | Tenericutes            | Mollicutes       | 0            | 0             | 0            | 0             |
|         | <b>Tenericutes</b>     | <b>TOTAL</b>     | <b>0</b>     | <b>0</b>      | <b>3215</b>  | <b>2367</b>   |
|         |                        |                  |              |               |              |               |
| seq83   | Verrucomicrobia        | Verrucomicrobiae | 11           | 0             | 0            | 0             |
| seq103  | Verrucomicrobia        | Verrucomicrobiae | 0            | 0             | 0            | 0             |
| seq105  | Verrucomicrobia        | Verrucomicrobiae | 0            | 0             | 931          | 1115          |
| seq1087 | Verrucomicrobia        | Verrucomicrobiae | 0            | 0             | 0            | 0             |
| seq727  | Verrucomicrobia        | Verrucomicrobiae | 0            | 0             | 194          | 148           |
|         | <b>Verrucomicrobia</b> | <b>TOTAL</b>     | <b>11</b>    | <b>0</b>      | <b>1125</b>  | <b>1263</b>   |
|         |                        |                  |              |               |              |               |
| seq258  |                        |                  | 0            | 0             | 864          | 2243          |
| seq429  |                        |                  | 19           | 0             | 18           | 12            |
| seq524  |                        |                  | 0            | 0             | 0            | 0             |
| seq780  |                        |                  | 0            | 0             | 0            | 0             |

Sequence Count Table

|         | Phylum                 | Class            | Subject23WK0 | Subject23WK12 | Subject24WK0 | Subject24WK12 |
|---------|------------------------|------------------|--------------|---------------|--------------|---------------|
| seq430  | Tenericutes            | Mollicutes       | 0            | 0             | 0            | 0             |
| seq539  | Tenericutes            | Mollicutes       | 0            | 0             | 0            | 0             |
| seq688  | Tenericutes            | Mollicutes       | 0            | 0             | 0            | 0             |
| seq823  | Tenericutes            | Mollicutes       | 0            | 0             | 0            | 0             |
| seq877  | Tenericutes            | Mollicutes       | 0            | 0             | 0            | 0             |
| seq903  | Tenericutes            | Mollicutes       | 0            | 0             | 0            | 0             |
| seq1041 | Tenericutes            | Mollicutes       | 0            | 40            | 0            | 0             |
| seq1066 | Tenericutes            | Mollicutes       | 0            | 0             | 0            | 0             |
| seq1145 | Tenericutes            | Mollicutes       | 0            | 0             | 0            | 0             |
| seq1161 | Tenericutes            | Mollicutes       | 0            | 0             | 0            | 0             |
| seq1226 | Tenericutes            | Mollicutes       | 0            | 0             | 0            | 0             |
| seq1290 | Tenericutes            | Mollicutes       | 0            | 0             | 0            | 0             |
| seq1357 | Tenericutes            | Mollicutes       | 0            | 0             | 0            | 0             |
| seq1395 | Tenericutes            | Mollicutes       | 0            | 0             | 0            | 0             |
| seq1517 | Tenericutes            | Mollicutes       | 0            | 0             | 0            | 0             |
| seq1551 | Tenericutes            | Mollicutes       | 0            | 0             | 0            | 0             |
| seq1592 | Tenericutes            | Mollicutes       | 0            | 0             | 0            | 0             |
| seq1606 | Tenericutes            | Mollicutes       | 0            | 0             | 0            | 0             |
| seq1618 | Tenericutes            | Mollicutes       | 0            | 0             | 0            | 0             |
|         | <b>Tenericutes</b>     | <b>TOTAL</b>     | <b>0</b>     | <b>40</b>     | <b>0</b>     | <b>0</b>      |
|         |                        |                  |              |               |              |               |
| seq83   | Verrucomicrobia        | Verrucomicrobiae | 0            | 0             | 0            | 0             |
| seq103  | Verrucomicrobia        | Verrucomicrobiae | 0            | 0             | 0            | 0             |
| seq105  | Verrucomicrobia        | Verrucomicrobiae | 17           | 442           | 128          | 1344          |
| seq1087 | Verrucomicrobia        | Verrucomicrobiae | 0            | 0             | 0            | 0             |
| seq727  | Verrucomicrobia        | Verrucomicrobiae | 0            | 0             | 0            | 0             |
|         | <b>Verrucomicrobia</b> | <b>TOTAL</b>     | <b>17</b>    | <b>442</b>    | <b>128</b>   | <b>1344</b>   |
|         |                        |                  |              |               |              |               |
| seq258  |                        |                  | 0            | 0             | 0            | 0             |
| seq429  |                        |                  | 0            | 10            | 0            | 0             |
| seq524  |                        |                  | 0            | 21            | 12           | 0             |
| seq780  |                        |                  | 0            | 0             | 0            | 0             |

Sequence Count Table

|         | Phylum                 | Class            | Subject11WK0 | Subject11WK12 | Subject12WK0 | Subject12WK12 |
|---------|------------------------|------------------|--------------|---------------|--------------|---------------|
| seq430  | Tenericutes            | Mollicutes       | 0            | 0             | 0            | 0             |
| seq539  | Tenericutes            | Mollicutes       | 0            | 0             | 0            | 0             |
| seq688  | Tenericutes            | Mollicutes       | 0            | 0             | 0            | 0             |
| seq823  | Tenericutes            | Mollicutes       | 0            | 0             | 0            | 0             |
| seq877  | Tenericutes            | Mollicutes       | 0            | 0             | 0            | 0             |
| seq903  | Tenericutes            | Mollicutes       | 0            | 0             | 0            | 0             |
| seq1041 | Tenericutes            | Mollicutes       | 0            | 0             | 0            | 0             |
| seq1066 | Tenericutes            | Mollicutes       | 0            | 0             | 0            | 0             |
| seq1145 | Tenericutes            | Mollicutes       | 0            | 0             | 0            | 0             |
| seq1161 | Tenericutes            | Mollicutes       | 0            | 0             | 0            | 0             |
| seq1226 | Tenericutes            | Mollicutes       | 0            | 0             | 0            | 0             |
| seq1290 | Tenericutes            | Mollicutes       | 0            | 0             | 0            | 0             |
| seq1357 | Tenericutes            | Mollicutes       | 0            | 0             | 0            | 0             |
| seq1395 | Tenericutes            | Mollicutes       | 0            | 0             | 0            | 0             |
| seq1517 | Tenericutes            | Mollicutes       | 0            | 0             | 0            | 0             |
| seq1551 | Tenericutes            | Mollicutes       | 0            | 0             | 0            | 0             |
| seq1592 | Tenericutes            | Mollicutes       | 0            | 0             | 0            | 0             |
| seq1606 | Tenericutes            | Mollicutes       | 0            | 0             | 0            | 0             |
| seq1618 | Tenericutes            | Mollicutes       | 0            | 0             | 0            | 0             |
|         | <b>Tenericutes</b>     | <b>TOTAL</b>     | <b>0</b>     | <b>0</b>      | <b>0</b>     | <b>0</b>      |
|         |                        |                  |              |               |              |               |
| seq83   | Verrucomicrobia        | Verrucomicrobiae | 0            | 0             | 0            | 0             |
| seq103  | Verrucomicrobia        | Verrucomicrobiae | 5712         | 0             | 141          | 224           |
| seq105  | Verrucomicrobia        | Verrucomicrobiae | 0            | 0             | 0            | 0             |
| seq1087 | Verrucomicrobia        | Verrucomicrobiae | 0            | 0             | 0            | 0             |
| seq727  | Verrucomicrobia        | Verrucomicrobiae | 0            | 0             | 0            | 0             |
|         | <b>Verrucomicrobia</b> | <b>TOTAL</b>     | <b>5712</b>  | <b>0</b>      | <b>141</b>   | <b>224</b>    |
|         |                        |                  |              |               |              |               |
| seq258  |                        |                  | 0            | 0             | 0            | 0             |
| seq429  |                        |                  | 14           | 0             | 19           | 25            |
| seq524  |                        |                  | 0            | 0             | 4            | 8             |
| seq780  |                        |                  | 0            | 0             | 0            | 0             |

Sequence Count Table

|         | Phylum                 | Class            | Subject25WK0 | Subject25WK12 | Subject38WK0 | Subject38WK12 |
|---------|------------------------|------------------|--------------|---------------|--------------|---------------|
| seq430  | Tenericutes            | Mollicutes       | 0            | 0             | 0            | 0             |
| seq539  | Tenericutes            | Mollicutes       | 0            | 0             | 0            | 0             |
| seq688  | Tenericutes            | Mollicutes       | 0            | 0             | 0            | 0             |
| seq823  | Tenericutes            | Mollicutes       | 0            | 0             | 0            | 0             |
| seq877  | Tenericutes            | Mollicutes       | 0            | 0             | 0            | 0             |
| seq903  | Tenericutes            | Mollicutes       | 0            | 0             | 0            | 0             |
| seq1041 | Tenericutes            | Mollicutes       | 0            | 0             | 0            | 0             |
| seq1066 | Tenericutes            | Mollicutes       | 0            | 0             | 0            | 0             |
| seq1145 | Tenericutes            | Mollicutes       | 0            | 0             | 0            | 0             |
| seq1161 | Tenericutes            | Mollicutes       | 0            | 0             | 0            | 0             |
| seq1226 | Tenericutes            | Mollicutes       | 0            | 0             | 0            | 0             |
| seq1290 | Tenericutes            | Mollicutes       | 0            | 0             | 0            | 0             |
| seq1357 | Tenericutes            | Mollicutes       | 0            | 0             | 0            | 0             |
| seq1395 | Tenericutes            | Mollicutes       | 0            | 0             | 0            | 0             |
| seq1517 | Tenericutes            | Mollicutes       | 0            | 0             | 0            | 0             |
| seq1551 | Tenericutes            | Mollicutes       | 0            | 0             | 0            | 0             |
| seq1592 | Tenericutes            | Mollicutes       | 0            | 0             | 0            | 0             |
| seq1606 | Tenericutes            | Mollicutes       | 0            | 0             | 0            | 0             |
| seq1618 | Tenericutes            | Mollicutes       | 0            | 0             | 0            | 0             |
|         | <b>Tenericutes</b>     | <b>TOTAL</b>     | <b>0</b>     | <b>0</b>      | <b>0</b>     | <b>0</b>      |
|         |                        |                  |              |               |              |               |
| seq83   | Verrucomicrobia        | Verrucomicrobiae | 0            | 0             | 0            | 0             |
| seq103  | Verrucomicrobia        | Verrucomicrobiae | 0            | 823           | 0            | 0             |
| seq105  | Verrucomicrobia        | Verrucomicrobiae | 0            | 0             | 0            | 0             |
| seq1087 | Verrucomicrobia        | Verrucomicrobiae | 0            | 0             | 0            | 0             |
| seq727  | Verrucomicrobia        | Verrucomicrobiae | 0            | 0             | 0            | 0             |
|         | <b>Verrucomicrobia</b> | <b>TOTAL</b>     | <b>0</b>     | <b>823</b>    | <b>0</b>     | <b>0</b>      |
|         |                        |                  |              |               |              |               |
| seq258  |                        |                  | 0            | 0             | 0            | 0             |
| seq429  |                        |                  | 51           | 0             | 0            | 0             |
| seq524  |                        |                  | 27           | 0             | 0            | 0             |
| seq780  |                        |                  | 0            | 0             | 0            | 0             |



Sequence Count Table

|         | Phylum                 | Class            | Subject31WK0 | Subject31WK12 | Subject32WK0 | Subject32WK12 |
|---------|------------------------|------------------|--------------|---------------|--------------|---------------|
| seq430  | Tenericutes            | Mollicutes       | 0            | 0             | 0            | 0             |
| seq539  | Tenericutes            | Mollicutes       | 0            | 0             | 0            | 0             |
| seq688  | Tenericutes            | Mollicutes       | 0            | 0             | 0            | 0             |
| seq823  | Tenericutes            | Mollicutes       | 0            | 0             | 0            | 0             |
| seq877  | Tenericutes            | Mollicutes       | 0            | 0             | 0            | 0             |
| seq903  | Tenericutes            | Mollicutes       | 0            | 0             | 0            | 0             |
| seq1041 | Tenericutes            | Mollicutes       | 0            | 0             | 0            | 0             |
| seq1066 | Tenericutes            | Mollicutes       | 0            | 0             | 0            | 0             |
| seq1145 | Tenericutes            | Mollicutes       | 0            | 0             | 0            | 0             |
| seq1161 | Tenericutes            | Mollicutes       | 0            | 0             | 0            | 0             |
| seq1226 | Tenericutes            | Mollicutes       | 0            | 0             | 0            | 0             |
| seq1290 | Tenericutes            | Mollicutes       | 0            | 0             | 0            | 0             |
| seq1357 | Tenericutes            | Mollicutes       | 0            | 0             | 0            | 0             |
| seq1395 | Tenericutes            | Mollicutes       | 0            | 0             | 0            | 0             |
| seq1517 | Tenericutes            | Mollicutes       | 0            | 0             | 0            | 0             |
| seq1551 | Tenericutes            | Mollicutes       | 0            | 0             | 0            | 0             |
| seq1592 | Tenericutes            | Mollicutes       | 0            | 0             | 0            | 0             |
| seq1606 | Tenericutes            | Mollicutes       | 0            | 0             | 0            | 0             |
| seq1618 | Tenericutes            | Mollicutes       | 0            | 0             | 0            | 0             |
|         | <b>Tenericutes</b>     | <b>TOTAL</b>     | <b>0</b>     | <b>0</b>      | <b>0</b>     | <b>0</b>      |
|         |                        |                  |              |               |              |               |
| seq83   | Verrucomicrobia        | Verrucomicrobiae | 0            | 0             | 0            | 0             |
| seq103  | Verrucomicrobia        | Verrucomicrobiae | 0            | 0             | 304          | 0             |
| seq105  | Verrucomicrobia        | Verrucomicrobiae | 0            | 0             | 0            | 0             |
| seq1087 | Verrucomicrobia        | Verrucomicrobiae | 0            | 0             | 0            | 0             |
| seq727  | Verrucomicrobia        | Verrucomicrobiae | 0            | 0             | 0            | 0             |
|         | <b>Verrucomicrobia</b> | <b>TOTAL</b>     | <b>0</b>     | <b>0</b>      | <b>304</b>   | <b>0</b>      |
|         |                        |                  |              |               |              |               |
| seq258  |                        |                  | 0            | 0             | 0            | 0             |
| seq429  |                        |                  | 0            | 0             | 6            | 0             |
| seq524  |                        |                  | 0            | 0             | 0            | 0             |
| seq780  |                        |                  | 0            | 0             | 0            | 0             |

Sequence Count Table

|         | Phylum                 | Class            | Subject13WK0 | Subject13WK12 | Subject39WK0 | Subject39WK12 |
|---------|------------------------|------------------|--------------|---------------|--------------|---------------|
| seq430  | Tenericutes            | Mollicutes       | 0            | 0             | 0            | 0             |
| seq539  | Tenericutes            | Mollicutes       | 0            | 0             | 0            | 0             |
| seq688  | Tenericutes            | Mollicutes       | 0            | 0             | 0            | 0             |
| seq823  | Tenericutes            | Mollicutes       | 0            | 0             | 0            | 0             |
| seq877  | Tenericutes            | Mollicutes       | 0            | 0             | 0            | 0             |
| seq903  | Tenericutes            | Mollicutes       | 0            | 0             | 0            | 0             |
| seq1041 | Tenericutes            | Mollicutes       | 25           | 63            | 0            | 0             |
| seq1066 | Tenericutes            | Mollicutes       | 0            | 0             | 0            | 0             |
| seq1145 | Tenericutes            | Mollicutes       | 0            | 0             | 0            | 0             |
| seq1161 | Tenericutes            | Mollicutes       | 0            | 0             | 0            | 0             |
| seq1226 | Tenericutes            | Mollicutes       | 0            | 0             | 0            | 0             |
| seq1290 | Tenericutes            | Mollicutes       | 0            | 0             | 0            | 0             |
| seq1357 | Tenericutes            | Mollicutes       | 0            | 0             | 0            | 0             |
| seq1395 | Tenericutes            | Mollicutes       | 0            | 0             | 0            | 0             |
| seq1517 | Tenericutes            | Mollicutes       | 0            | 0             | 0            | 0             |
| seq1551 | Tenericutes            | Mollicutes       | 0            | 0             | 0            | 0             |
| seq1592 | Tenericutes            | Mollicutes       | 0            | 0             | 0            | 0             |
| seq1606 | Tenericutes            | Mollicutes       | 0            | 0             | 0            | 0             |
| seq1618 | Tenericutes            | Mollicutes       | 0            | 0             | 0            | 0             |
|         | <b>Tenericutes</b>     | <b>TOTAL</b>     | <b>25</b>    | <b>63</b>     | <b>0</b>     | <b>0</b>      |
|         |                        |                  |              |               |              |               |
| seq83   | Verrucomicrobia        | Verrucomicrobiae | 390          | 4886          | 0            | 0             |
| seq103  | Verrucomicrobia        | Verrucomicrobiae | 0            | 0             | 0            | 0             |
| seq105  | Verrucomicrobia        | Verrucomicrobiae | 0            | 0             | 0            | 8             |
| seq1087 | Verrucomicrobia        | Verrucomicrobiae | 0            | 0             | 0            | 0             |
| seq727  | Verrucomicrobia        | Verrucomicrobiae | 0            | 0             | 0            | 0             |
|         | <b>Verrucomicrobia</b> | <b>TOTAL</b>     | <b>390</b>   | <b>4886</b>   | <b>0</b>     | <b>8</b>      |
|         |                        |                  |              |               |              |               |
| seq258  |                        |                  | 0            | 0             | 0            | 0             |
| seq429  |                        |                  | 31           | 14            | 0            | 9             |
| seq524  |                        |                  | 22           | 12            | 0            | 83            |
| seq780  |                        |                  | 0            | 0             | 0            | 0             |

Sequence Count Table

|         | Phylum                 | Class            | Subject26WK0 | Subject26WK12 | Subject14WK0 | Subject14WK12 |
|---------|------------------------|------------------|--------------|---------------|--------------|---------------|
| seq430  | Tenericutes            | Mollicutes       | 0            | 0             | 509          | 38            |
| seq539  | Tenericutes            | Mollicutes       | 0            | 0             | 0            | 0             |
| seq688  | Tenericutes            | Mollicutes       | 0            | 0             | 0            | 0             |
| seq823  | Tenericutes            | Mollicutes       | 0            | 0             | 0            | 0             |
| seq877  | Tenericutes            | Mollicutes       | 0            | 0             | 0            | 0             |
| seq903  | Tenericutes            | Mollicutes       | 0            | 0             | 0            | 0             |
| seq1041 | Tenericutes            | Mollicutes       | 0            | 0             | 0            | 0             |
| seq1066 | Tenericutes            | Mollicutes       | 0            | 0             | 0            | 0             |
| seq1145 | Tenericutes            | Mollicutes       | 0            | 0             | 0            | 0             |
| seq1161 | Tenericutes            | Mollicutes       | 0            | 0             | 0            | 0             |
| seq1226 | Tenericutes            | Mollicutes       | 0            | 0             | 0            | 0             |
| seq1290 | Tenericutes            | Mollicutes       | 0            | 0             | 0            | 0             |
| seq1357 | Tenericutes            | Mollicutes       | 0            | 0             | 0            | 0             |
| seq1395 | Tenericutes            | Mollicutes       | 0            | 0             | 0            | 0             |
| seq1517 | Tenericutes            | Mollicutes       | 0            | 0             | 0            | 0             |
| seq1551 | Tenericutes            | Mollicutes       | 0            | 0             | 24           | 0             |
| seq1592 | Tenericutes            | Mollicutes       | 0            | 0             | 0            | 0             |
| seq1606 | Tenericutes            | Mollicutes       | 0            | 0             | 0            | 0             |
| seq1618 | Tenericutes            | Mollicutes       | 0            | 0             | 0            | 0             |
|         | <b>Tenericutes</b>     | <b>TOTAL</b>     | <b>0</b>     | <b>0</b>      | <b>533</b>   | <b>38</b>     |
|         |                        |                  |              |               |              |               |
| seq83   | Verrucomicrobia        | Verrucomicrobiae | 0            | 0             | 0            | 0             |
| seq103  | Verrucomicrobia        | Verrucomicrobiae | 0            | 0             | 0            | 0             |
| seq105  | Verrucomicrobia        | Verrucomicrobiae | 0            | 0             | 0            | 0             |
| seq1087 | Verrucomicrobia        | Verrucomicrobiae | 0            | 0             | 0            | 0             |
| seq727  | Verrucomicrobia        | Verrucomicrobiae | 0            | 0             | 0            | 0             |
|         | <b>Verrucomicrobia</b> | <b>TOTAL</b>     | <b>0</b>     | <b>0</b>      | <b>0</b>     | <b>0</b>      |
|         |                        |                  |              |               |              |               |
| seq258  |                        |                  | 0            | 0             | 0            | 0             |
| seq429  |                        |                  | 12           | 24            | 0            | 11            |
| seq524  |                        |                  | 0            | 0             | 0            | 2             |
| seq780  |                        |                  | 0            | 0             | 0            | 0             |

Sequence Count Table

|         | Phylum                 | Class            | Subject27WK0 | Subject27WK12 | Subject15WK0 | Subject15WK12 |
|---------|------------------------|------------------|--------------|---------------|--------------|---------------|
| seq430  | Tenericutes            | Mollicutes       | 0            | 0             | 0            | 0             |
| seq539  | Tenericutes            | Mollicutes       | 0            | 0             | 0            | 0             |
| seq688  | Tenericutes            | Mollicutes       | 0            | 0             | 0            | 0             |
| seq823  | Tenericutes            | Mollicutes       | 0            | 0             | 0            | 0             |
| seq877  | Tenericutes            | Mollicutes       | 0            | 0             | 0            | 0             |
| seq903  | Tenericutes            | Mollicutes       | 0            | 0             | 0            | 0             |
| seq1041 | Tenericutes            | Mollicutes       | 0            | 0             | 0            | 0             |
| seq1066 | Tenericutes            | Mollicutes       | 0            | 0             | 0            | 0             |
| seq1145 | Tenericutes            | Mollicutes       | 0            | 0             | 0            | 0             |
| seq1161 | Tenericutes            | Mollicutes       | 0            | 0             | 0            | 0             |
| seq1226 | Tenericutes            | Mollicutes       | 0            | 0             | 0            | 0             |
| seq1290 | Tenericutes            | Mollicutes       | 0            | 0             | 0            | 0             |
| seq1357 | Tenericutes            | Mollicutes       | 0            | 0             | 0            | 0             |
| seq1395 | Tenericutes            | Mollicutes       | 0            | 0             | 0            | 0             |
| seq1517 | Tenericutes            | Mollicutes       | 0            | 0             | 0            | 0             |
| seq1551 | Tenericutes            | Mollicutes       | 0            | 0             | 0            | 0             |
| seq1592 | Tenericutes            | Mollicutes       | 0            | 0             | 0            | 0             |
| seq1606 | Tenericutes            | Mollicutes       | 0            | 0             | 0            | 0             |
| seq1618 | Tenericutes            | Mollicutes       | 0            | 0             | 0            | 0             |
|         | <b>Tenericutes</b>     | <b>TOTAL</b>     | <b>0</b>     | <b>0</b>      | <b>0</b>     | <b>0</b>      |
|         |                        |                  |              |               |              |               |
| seq83   | Verrucomicrobia        | Verrucomicrobiae | 0            | 0             | 0            | 0             |
| seq103  | Verrucomicrobia        | Verrucomicrobiae | 0            | 0             | 102          | 0             |
| seq105  | Verrucomicrobia        | Verrucomicrobiae | 184          | 27            | 0            | 0             |
| seq1087 | Verrucomicrobia        | Verrucomicrobiae | 0            | 0             | 0            | 0             |
| seq727  | Verrucomicrobia        | Verrucomicrobiae | 0            | 0             | 0            | 0             |
|         | <b>Verrucomicrobia</b> | <b>TOTAL</b>     | <b>184</b>   | <b>27</b>     | <b>102</b>   | <b>0</b>      |
|         |                        |                  |              |               |              |               |
| seq258  |                        |                  | 0            | 0             | 0            | 0             |
| seq429  |                        |                  | 0            | 0             | 0            | 0             |
| seq524  |                        |                  | 0            | 0             | 0            | 0             |
| seq780  |                        |                  | 0            | 0             | 0            | 0             |

Sequence Count Table

|                | <b>Phylum</b>          | <b>Class</b>     | <b>Δ</b> |  |  |  |
|----------------|------------------------|------------------|----------|--|--|--|
| <b>seq430</b>  | Tenericutes            | Mollicutes       |          |  |  |  |
| <b>seq539</b>  | Tenericutes            | Mollicutes       |          |  |  |  |
| <b>seq688</b>  | Tenericutes            | Mollicutes       |          |  |  |  |
| <b>seq823</b>  | Tenericutes            | Mollicutes       |          |  |  |  |
| <b>seq877</b>  | Tenericutes            | Mollicutes       |          |  |  |  |
| <b>seq903</b>  | Tenericutes            | Mollicutes       |          |  |  |  |
| <b>seq1041</b> | Tenericutes            | Mollicutes       |          |  |  |  |
| <b>seq1066</b> | Tenericutes            | Mollicutes       |          |  |  |  |
| <b>seq1145</b> | Tenericutes            | Mollicutes       |          |  |  |  |
| <b>seq1161</b> | Tenericutes            | Mollicutes       |          |  |  |  |
| <b>seq1226</b> | Tenericutes            | Mollicutes       |          |  |  |  |
| <b>seq1290</b> | Tenericutes            | Mollicutes       |          |  |  |  |
| <b>seq1357</b> | Tenericutes            | Mollicutes       |          |  |  |  |
| <b>seq1395</b> | Tenericutes            | Mollicutes       |          |  |  |  |
| <b>seq1517</b> | Tenericutes            | Mollicutes       |          |  |  |  |
| <b>seq1551</b> | Tenericutes            | Mollicutes       |          |  |  |  |
| <b>seq1592</b> | Tenericutes            | Mollicutes       |          |  |  |  |
| <b>seq1606</b> | Tenericutes            | Mollicutes       |          |  |  |  |
| <b>seq1618</b> | Tenericutes            | Mollicutes       |          |  |  |  |
|                | <b>Tenericutes</b>     | <b>TOTAL</b>     |          |  |  |  |
|                |                        |                  |          |  |  |  |
| <b>seq83</b>   | Verrucomicrobia        | Verrucomicrobiae |          |  |  |  |
| <b>seq103</b>  | Verrucomicrobia        | Verrucomicrobiae |          |  |  |  |
| <b>seq105</b>  | Verrucomicrobia        | Verrucomicrobiae |          |  |  |  |
| <b>seq1087</b> | Verrucomicrobia        | Verrucomicrobiae |          |  |  |  |
| <b>seq727</b>  | Verrucomicrobia        | Verrucomicrobiae |          |  |  |  |
|                | <b>Verrucomicrobia</b> | <b>TOTAL</b>     |          |  |  |  |
|                |                        |                  |          |  |  |  |
| <b>seq258</b>  |                        |                  |          |  |  |  |
| <b>seq429</b>  |                        |                  |          |  |  |  |
| <b>seq524</b>  |                        |                  |          |  |  |  |
| <b>seq780</b>  |                        |                  |          |  |  |  |

Sequence Count Table

|                     | <b>Phylum</b> | <b>Class</b> | <b>Order</b> | <b>Family</b> |
|---------------------|---------------|--------------|--------------|---------------|
| seq980              |               |              |              |               |
| seq1024             |               |              |              |               |
| seq1180             |               |              |              |               |
| seq1191             |               |              |              |               |
| seq1396             |               |              |              |               |
| seq1448             |               |              |              |               |
| seq1469             |               |              |              |               |
| seq1498             |               |              |              |               |
| seq1549             |               |              |              |               |
| seq1741             |               |              |              |               |
| seq1897             |               |              |              |               |
| seq1904             |               |              |              |               |
| seq1906             |               |              |              |               |
| <b>Unclassified</b> | <b>TOTAL</b>  |              |              |               |

Sequence Count Table

|                     | <b>Phylum</b> | <b>Class</b> | <b>Genus</b> | <b>Species</b> |
|---------------------|---------------|--------------|--------------|----------------|
| seq980              |               |              |              |                |
| seq1024             |               |              |              |                |
| seq1180             |               |              |              |                |
| seq1191             |               |              |              |                |
| seq1396             |               |              |              |                |
| seq1448             |               |              |              |                |
| seq1469             |               |              |              |                |
| seq1498             |               |              |              |                |
| seq1549             |               |              |              |                |
| seq1741             |               |              |              |                |
| seq1897             |               |              |              |                |
| seq1904             |               |              |              |                |
| seq1906             |               |              |              |                |
| <b>Unclassified</b> | <b>TOTAL</b>  |              |              |                |

Sequence Count Table

|                     | Phylum       | Class | Subject34WK0 | Subject34WK12 | Subject16WK0 | Subject16WK12 |
|---------------------|--------------|-------|--------------|---------------|--------------|---------------|
| seq980              |              |       | 0            | 0             | 0            | 0             |
| seq1024             |              |       | 0            | 0             | 0            | 0             |
| seq1180             |              |       | 0            | 0             | 0            | 0             |
| seq1191             |              |       | 0            | 0             | 0            | 0             |
| seq1396             |              |       | 0            | 0             | 0            | 0             |
| seq1448             |              |       | 0            | 0             | 0            | 0             |
| seq1469             |              |       | 0            | 0             | 0            | 0             |
| seq1498             |              |       | 0            | 0             | 0            | 0             |
| seq1549             |              |       | 0            | 0             | 0            | 0             |
| seq1741             |              |       | 0            | 0             | 0            | 0             |
| seq1897             |              |       | 0            | 0             | 0            | 0             |
| seq1904             |              |       | 0            | 0             | 0            | 0             |
| seq1906             |              |       | 0            | 0             | 0            | 0             |
| <b>Unclassified</b> | <b>TOTAL</b> |       | <b>0</b>     | <b>0</b>      | <b>6</b>     | <b>24</b>     |



Sequence Count Table

|              | Phylum       | Class | Subject17WK0 | Subject17WK12 | Subject1WK0 | Subject1WK12 |
|--------------|--------------|-------|--------------|---------------|-------------|--------------|
| seq980       |              |       | 0            | 0             | 0           | 0            |
| seq1024      |              |       | 0            | 0             | 0           | 0            |
| seq1180      |              |       | 0            | 0             | 0           | 0            |
| seq1191      |              |       | 0            | 0             | 0           | 0            |
| seq1396      |              |       | 0            | 0             | 0           | 0            |
| seq1448      |              |       | 0            | 0             | 0           | 0            |
| seq1469      |              |       | 0            | 0             | 0           | 0            |
| seq1498      |              |       | 0            | 0             | 0           | 0            |
| seq1549      |              |       | 0            | 0             | 0           | 0            |
| seq1741      |              |       | 3            | 0             | 0           | 0            |
| seq1897      |              |       | 0            | 0             | 0           | 0            |
| seq1904      |              |       | 0            | 0             | 0           | 0            |
| seq1906      |              |       | 0            | 0             | 0           | 0            |
| Unclassified | <b>TOTAL</b> |       | 60           | 48            | 16          | 15           |

Sequence Count Table

|              | Phylum       | Class | Subject2WK0 | Subject2WK12 | Subject3WK0 | Subject3WK12 |
|--------------|--------------|-------|-------------|--------------|-------------|--------------|
| seq980       |              |       | 0           | 0            | 0           | 0            |
| seq1024      |              |       | 0           | 0            | 0           | 0            |
| seq1180      |              |       | 0           | 0            | 0           | 0            |
| seq1191      |              |       | 0           | 0            | 0           | 0            |
| seq1396      |              |       | 0           | 0            | 0           | 0            |
| seq1448      |              |       | 0           | 0            | 0           | 0            |
| seq1469      |              |       | 0           | 0            | 0           | 0            |
| seq1498      |              |       | 0           | 0            | 0           | 0            |
| seq1549      |              |       | 0           | 0            | 0           | 0            |
| seq1741      |              |       | 0           | 0            | 0           | 0            |
| seq1897      |              |       | 0           | 0            | 0           | 0            |
| seq1904      |              |       | 0           | 0            | 0           | 0            |
| seq1906      |              |       | 0           | 0            | 0           | 0            |
| Unclassified | <b>TOTAL</b> |       | <b>0</b>    | <b>0</b>     | <b>0</b>    | <b>0</b>     |

Sequence Count Table

|              | Phylum       | Class | Subject4WK0 | Subject4WK12 | Subject5WK0 | Subject5WK12 |
|--------------|--------------|-------|-------------|--------------|-------------|--------------|
| seq980       |              |       | 0           | 0            | 0           | 0            |
| seq1024      |              |       | 0           | 0            | 0           | 0            |
| seq1180      |              |       | 0           | 0            | 0           | 0            |
| seq1191      |              |       | 8           | 8            | 0           | 0            |
| seq1396      |              |       | 0           | 0            | 0           | 0            |
| seq1448      |              |       | 0           | 0            | 0           | 0            |
| seq1469      |              |       | 0           | 0            | 0           | 0            |
| seq1498      |              |       | 7           | 21           | 0           | 0            |
| seq1549      |              |       | 0           | 0            | 0           | 0            |
| seq1741      |              |       | 0           | 0            | 0           | 0            |
| seq1897      |              |       | 0           | 2            | 0           | 0            |
| seq1904      |              |       | 0           | 0            | 0           | 0            |
| seq1906      |              |       | 0           | 0            | 0           | 0            |
| Unclassified | <b>TOTAL</b> |       | 69          | 172          | 0           | 0            |

Sequence Count Table

|                     | <b>Phylum</b> | <b>Class</b> | <b>Subject6WK0</b> | <b>Subject6WK12</b> | <b>Subject18WK0</b> | <b>Subject18WK12</b> |
|---------------------|---------------|--------------|--------------------|---------------------|---------------------|----------------------|
| <b>seq980</b>       |               |              | 0                  | 0                   | 0                   | 0                    |
| <b>seq1024</b>      |               |              | 0                  | 0                   | 0                   | 0                    |
| <b>seq1180</b>      |               |              | 0                  | 0                   | 0                   | 0                    |
| <b>seq1191</b>      |               |              | 0                  | 9                   | 0                   | 0                    |
| <b>seq1396</b>      |               |              | 0                  | 0                   | 0                   | 0                    |
| <b>seq1448</b>      |               |              | 0                  | 0                   | 0                   | 0                    |
| <b>seq1469</b>      |               |              | 0                  | 0                   | 0                   | 0                    |
| <b>seq1498</b>      |               |              | 0                  | 0                   | 0                   | 0                    |
| <b>seq1549</b>      |               |              | 0                  | 0                   | 0                   | 0                    |
| <b>seq1741</b>      |               |              | 0                  | 0                   | 0                   | 0                    |
| <b>seq1897</b>      |               |              | 0                  | 0                   | 0                   | 0                    |
| <b>seq1904</b>      |               |              | 0                  | 0                   | 0                   | 0                    |
| <b>seq1906</b>      |               |              | 0                  | 0                   | 0                   | 0                    |
| <b>Unclassified</b> | <b>TOTAL</b>  |              | <b>76</b>          | <b>175</b>          | <b>193</b>          | <b>107</b>           |

Sequence Count Table

|              | Phylum       | Class | Subject19WK0 | Subject19WK12 | Subject20WK0 | Subject20WK12 |
|--------------|--------------|-------|--------------|---------------|--------------|---------------|
| seq980       |              |       | 0            | 0             | 0            | 0             |
| seq1024      |              |       | 0            | 0             | 0            | 0             |
| seq1180      |              |       | 0            | 0             | 17           | 10            |
| seq1191      |              |       | 0            | 0             | 0            | 0             |
| seq1396      |              |       | 0            | 0             | 30           | 12            |
| seq1448      |              |       | 0            | 0             | 34           | 0             |
| seq1469      |              |       | 0            | 0             | 0            | 0             |
| seq1498      |              |       | 0            | 0             | 0            | 0             |
| seq1549      |              |       | 0            | 0             | 0            | 0             |
| seq1741      |              |       | 0            | 0             | 0            | 0             |
| seq1897      |              |       | 0            | 0             | 0            | 0             |
| seq1904      |              |       | 0            | 0             | 0            | 0             |
| seq1906      |              |       | 0            | 0             | 0            | 0             |
| Unclassified | <b>TOTAL</b> |       | 24           | 48            | 356          | 42            |

Sequence Count Table

|                     | <b>Phylum</b> | <b>Class</b> | <b>Subject7WK0</b> | <b>Subject7WK12</b> | <b>Subject21WK0</b> | <b>Subject21WK12</b> |
|---------------------|---------------|--------------|--------------------|---------------------|---------------------|----------------------|
| seq980              |               |              | 0                  | 0                   | 0                   | 0                    |
| seq1024             |               |              | 0                  | 0                   | 0                   | 0                    |
| seq1180             |               |              | 0                  | 0                   | 0                   | 0                    |
| seq1191             |               |              | 0                  | 0                   | 0                   | 0                    |
| seq1396             |               |              | 0                  | 0                   | 0                   | 0                    |
| seq1448             |               |              | 0                  | 0                   | 0                   | 0                    |
| seq1469             |               |              | 0                  | 0                   | 0                   | 0                    |
| seq1498             |               |              | 0                  | 0                   | 0                   | 0                    |
| seq1549             |               |              | 0                  | 0                   | 0                   | 0                    |
| seq1741             |               |              | 0                  | 0                   | 0                   | 0                    |
| seq1897             |               |              | 0                  | 0                   | 0                   | 0                    |
| seq1904             |               |              | 0                  | 0                   | 0                   | 0                    |
| seq1906             |               |              | 0                  | 0                   | 0                   | 0                    |
| <b>Unclassified</b> | <b>TOTAL</b>  |              | <b>179</b>         | <b>24</b>           | <b>0</b>            | <b>56</b>            |

Sequence Count Table

|              | Phylum       | Class | Subject8WK0 | Subject8WK12 | Subject9WK0 | Subject9WK12 |
|--------------|--------------|-------|-------------|--------------|-------------|--------------|
| seq980       |              |       | 0           | 0            | 0           | 0            |
| seq1024      |              |       | 0           | 0            | 0           | 0            |
| seq1180      |              |       | 0           | 0            | 0           | 0            |
| seq1191      |              |       | 0           | 0            | 0           | 0            |
| seq1396      |              |       | 0           | 0            | 0           | 0            |
| seq1448      |              |       | 0           | 0            | 0           | 0            |
| seq1469      |              |       | 0           | 0            | 0           | 0            |
| seq1498      |              |       | 0           | 0            | 0           | 0            |
| seq1549      |              |       | 0           | 0            | 0           | 0            |
| seq1741      |              |       | 0           | 0            | 3           | 0            |
| seq1897      |              |       | 0           | 0            | 0           | 0            |
| seq1904      |              |       | 0           | 0            | 0           | 0            |
| seq1906      |              |       | 0           | 0            | 0           | 0            |
| Unclassified | <b>TOTAL</b> |       | 54          | 27           | 21          | 0            |

Sequence Count Table

|                     | Phylum       | Class | Subject10WK0 | Subject10WK12 | Subject22WK0 | Subject22WK12 |
|---------------------|--------------|-------|--------------|---------------|--------------|---------------|
| seq980              |              |       | 0            | 0             | 0            | 0             |
| seq1024             |              |       | 0            | 0             | 58           | 76            |
| seq1180             |              |       | 0            | 0             | 0            | 0             |
| seq1191             |              |       | 0            | 0             | 0            | 14            |
| seq1396             |              |       | 0            | 0             | 0            | 0             |
| seq1448             |              |       | 0            | 0             | 0            | 0             |
| seq1469             |              |       | 0            | 0             | 11           | 12            |
| seq1498             |              |       | 0            | 0             | 0            | 0             |
| seq1549             |              |       | 0            | 0             | 12           | 12            |
| seq1741             |              |       | 0            | 0             | 0            | 0             |
| seq1897             |              |       | 0            | 0             | 0            | 0             |
| seq1904             |              |       | 0            | 0             | 0            | 0             |
| seq1906             |              |       | 0            | 0             | 0            | 0             |
| <b>Unclassified</b> | <b>TOTAL</b> |       | <b>19</b>    | <b>0</b>      | <b>963</b>   | <b>2369</b>   |



Sequence Count Table

|              | Phylum       | Class | Subject23WK0 | Subject23WK12 | Subject24WK0 | Subject24WK12 |
|--------------|--------------|-------|--------------|---------------|--------------|---------------|
| seq980       |              |       | 34           | 117           | 0            | 0             |
| seq1024      |              |       | 0            | 0             | 0            | 0             |
| seq1180      |              |       | 0            | 59            | 0            | 0             |
| seq1191      |              |       | 0            | 5             | 0            | 4             |
| seq1396      |              |       | 0            | 0             | 0            | 0             |
| seq1448      |              |       | 0            | 0             | 0            | 0             |
| seq1469      |              |       | 0            | 0             | 0            | 0             |
| seq1498      |              |       | 0            | 0             | 0            | 0             |
| seq1549      |              |       | 0            | 0             | 0            | 0             |
| seq1741      |              |       | 0            | 0             | 0            | 0             |
| seq1897      |              |       | 0            | 0             | 0            | 0             |
| seq1904      |              |       | 0            | 0             | 0            | 0             |
| seq1906      |              |       | 0            | 0             | 0            | 0             |
| Unclassified | <b>TOTAL</b> |       | 34           | 212           | 12           | 4             |

Sequence Count Table

|              | Phylum       | Class | Subject11WK0 | Subject11WK12 | Subject12WK0 | Subject12WK12 |
|--------------|--------------|-------|--------------|---------------|--------------|---------------|
| seq980       |              |       | 0            | 0             | 0            | 0             |
| seq1024      |              |       | 0            | 0             | 0            | 0             |
| seq1180      |              |       | 0            | 0             | 0            | 0             |
| seq1191      |              |       | 0            | 0             | 0            | 0             |
| seq1396      |              |       | 0            | 0             | 0            | 0             |
| seq1448      |              |       | 0            | 0             | 0            | 0             |
| seq1469      |              |       | 0            | 0             | 0            | 0             |
| seq1498      |              |       | 0            | 0             | 0            | 0             |
| seq1549      |              |       | 0            | 0             | 0            | 0             |
| seq1741      |              |       | 0            | 0             | 0            | 0             |
| seq1897      |              |       | 0            | 0             | 0            | 0             |
| seq1904      |              |       | 0            | 0             | 0            | 0             |
| seq1906      |              |       | 0            | 0             | 0            | 0             |
| Unclassified | <b>TOTAL</b> |       | 14           | 0             | 23           | 33            |

Sequence Count Table

|              | Phylum       | Class | Subject25WK0 | Subject25WK12 | Subject38WK0 | Subject38WK12 |
|--------------|--------------|-------|--------------|---------------|--------------|---------------|
| seq980       |              |       | 0            | 0             | 0            | 0             |
| seq1024      |              |       | 0            | 0             | 0            | 0             |
| seq1180      |              |       | 0            | 0             | 0            | 0             |
| seq1191      |              |       | 14           | 0             | 0            | 0             |
| seq1396      |              |       | 0            | 0             | 0            | 0             |
| seq1448      |              |       | 0            | 0             | 0            | 0             |
| seq1469      |              |       | 0            | 0             | 0            | 0             |
| seq1498      |              |       | 0            | 0             | 0            | 0             |
| seq1549      |              |       | 0            | 0             | 0            | 0             |
| seq1741      |              |       | 4            | 0             | 0            | 0             |
| seq1897      |              |       | 0            | 0             | 0            | 0             |
| seq1904      |              |       | 0            | 0             | 0            | 0             |
| seq1906      |              |       | 0            | 0             | 0            | 0             |
| Unclassified | <b>TOTAL</b> |       | 96           | 0             | 0            | 0             |

Sequence Count Table

|              | Phylum       | Class | Subject31WK0 | Subject31WK12 | Subject32WK0 | Subject32WK12 |
|--------------|--------------|-------|--------------|---------------|--------------|---------------|
| seq980       |              |       | 0            | 0             | 0            | 0             |
| seq1024      |              |       | 0            | 0             | 0            | 0             |
| seq1180      |              |       | 0            | 0             | 0            | 0             |
| seq1191      |              |       | 0            | 0             | 0            | 0             |
| seq1396      |              |       | 0            | 0             | 0            | 0             |
| seq1448      |              |       | 0            | 0             | 0            | 0             |
| seq1469      |              |       | 0            | 0             | 0            | 0             |
| seq1498      |              |       | 0            | 0             | 0            | 0             |
| seq1549      |              |       | 0            | 0             | 0            | 0             |
| seq1741      |              |       | 0            | 0             | 0            | 0             |
| seq1897      |              |       | 0            | 0             | 0            | 0             |
| seq1904      |              |       | 0            | 0             | 2            | 0             |
| seq1906      |              |       | 0            | 0             | 0            | 0             |
| Unclassified | <b>TOTAL</b> |       | 0            | 0             | 8            | 0             |

Sequence Count Table

|              | Phylum       | Class | Subject13WK0 | Subject13WK12 | Subject39WK0 | Subject39WK12 |
|--------------|--------------|-------|--------------|---------------|--------------|---------------|
| seq980       |              |       | 0            | 0             | 0            | 0             |
| seq1024      |              |       | 0            | 0             | 0            | 0             |
| seq1180      |              |       | 0            | 0             | 0            | 0             |
| seq1191      |              |       | 21           | 0             | 0            | 0             |
| seq1396      |              |       | 0            | 0             | 0            | 0             |
| seq1448      |              |       | 0            | 0             | 0            | 0             |
| seq1469      |              |       | 9            | 0             | 0            | 0             |
| seq1498      |              |       | 0            | 0             | 0            | 0             |
| seq1549      |              |       | 0            | 0             | 0            | 0             |
| seq1741      |              |       | 0            | 0             | 0            | 0             |
| seq1897      |              |       | 0            | 0             | 0            | 0             |
| seq1904      |              |       | 0            | 0             | 0            | 0             |
| seq1906      |              |       | 0            | 0             | 0            | 2             |
| Unclassified | <b>TOTAL</b> |       | 83           | 26            | 0            | 94            |

Sequence Count Table

|              | Phylum       | Class | Subject26WK0 | Subject26WK12 | Subject14WK0 | Subject14WK12 |
|--------------|--------------|-------|--------------|---------------|--------------|---------------|
| seq980       |              |       | 0            | 0             | 0            | 0             |
| seq1024      |              |       | 0            | 0             | 0            | 0             |
| seq1180      |              |       | 0            | 0             | 0            | 0             |
| seq1191      |              |       | 0            | 0             | 0            | 0             |
| seq1396      |              |       | 0            | 0             | 0            | 0             |
| seq1448      |              |       | 0            | 0             | 0            | 0             |
| seq1469      |              |       | 0            | 0             | 0            | 0             |
| seq1498      |              |       | 0            | 0             | 0            | 0             |
| seq1549      |              |       | 0            | 0             | 0            | 0             |
| seq1741      |              |       | 0            | 0             | 0            | 0             |
| seq1897      |              |       | 0            | 0             | 0            | 0             |
| seq1904      |              |       | 0            | 0             | 0            | 0             |
| seq1906      |              |       | 0            | 0             | 0            | 0             |
| Unclassified | <b>TOTAL</b> |       | 12           | 24            | 0            | 13            |

Sequence Count Table

|              | Phylum       | Class | Subject27WK0 | Subject27WK12 | Subject15WK0 | Subject15WK12 |
|--------------|--------------|-------|--------------|---------------|--------------|---------------|
| seq980       |              |       | 0            | 0             | 0            | 0             |
| seq1024      |              |       | 0            | 0             | 0            | 0             |
| seq1180      |              |       | 0            | 0             | 0            | 0             |
| seq1191      |              |       | 0            | 0             | 0            | 0             |
| seq1396      |              |       | 0            | 0             | 0            | 0             |
| seq1448      |              |       | 0            | 0             | 0            | 0             |
| seq1469      |              |       | 0            | 0             | 0            | 0             |
| seq1498      |              |       | 0            | 0             | 0            | 0             |
| seq1549      |              |       | 0            | 0             | 0            | 0             |
| seq1741      |              |       | 0            | 0             | 0            | 0             |
| seq1897      |              |       | 0            | 0             | 0            | 0             |
| seq1904      |              |       | 0            | 0             | 0            | 0             |
| seq1906      |              |       | 0            | 0             | 0            | 0             |
| Unclassified | <b>TOTAL</b> |       | <b>0</b>     | <b>0</b>      | <b>0</b>     | <b>0</b>      |

Sequence Count Table

|                     | Phylum       | Class | $\Delta$ |  |  |  |
|---------------------|--------------|-------|----------|--|--|--|
| seq980              |              |       |          |  |  |  |
| seq1024             |              |       |          |  |  |  |
| seq1180             |              |       |          |  |  |  |
| seq1191             |              |       |          |  |  |  |
| seq1396             |              |       |          |  |  |  |
| seq1448             |              |       |          |  |  |  |
| seq1469             |              |       |          |  |  |  |
| seq1498             |              |       |          |  |  |  |
| seq1549             |              |       |          |  |  |  |
| seq1741             |              |       |          |  |  |  |
| seq1897             |              |       |          |  |  |  |
| seq1904             |              |       |          |  |  |  |
| seq1906             |              |       |          |  |  |  |
| <b>Unclassified</b> | <b>TOTAL</b> |       |          |  |  |  |



Phyla Composition (Figure 3)

| Week 0                |               |     |               |     |               |     |
|-----------------------|---------------|-----|---------------|-----|---------------|-----|
| Phyla                 | Subject16WK0  | %   | Subject17W    | %   | Subject1WK    | %   |
| Firmicutes            | 57486         | 41% | 77965         | 64% | 112302        | 68% |
| Bacteroidetes         | 72304         | 52% | 33654         | 28% | 28867         | 18% |
| Actinobacteria        | 4903          | 4%  | 8971          | 7%  | 4164          | 3%  |
| Proteobacteria        | 4689          | 3%  | 780           | 1%  | 10065         | 6%  |
| Verrucomicrobia       | 12            | 0%  | 0             | 0%  | 4524          | 3%  |
| Fusobacteria          | 0             | 0%  | 0             | 0%  | 0             | 0%  |
| Cyanobacteria         | 0             | 0%  | 0             | 0%  | 4846          | 3%  |
| Euryarchaeota         | 0             | 0%  | 0             | 0%  | 0             | 0%  |
| Tenericutes           | 0             | 0%  | 39            | 0%  | 0             | 0%  |
| Unclassified Bacteria | 6             | 0%  | 60            | 0%  | 16            | 0%  |
| Synergistetes         | 0             | 0%  | 35            | 0%  | 0             | 0%  |
| Lentisphaerae         | 0             | 0%  | 140           | 0%  | 0             | 0%  |
| Spirochaetes          | 0             | 0%  | 0             | 0%  | 0             | 0%  |
| Patescibacteria       | 0             | 0%  | 0             | 0%  | 0             | 0%  |
| Epsilonbacteraeota    | 0             | 0%  | 0             | 0%  | 0             | 0%  |
| <b>SUM</b>            | <b>139400</b> |     | <b>121644</b> |     | <b>164784</b> |     |
| Week 12               |               |     |               |     |               |     |
| Phyla                 | Subject16WK12 | %   | Subject17W    | %   | Subject1WK    | %   |
| Firmicutes            | 62368         | 51% | 127850        | 72% | 116787        | 66% |
| Bacteroidetes         | 44230         | 36% | 44180         | 25% | 32429         | 18% |
| Actinobacteria        | 12203         | 10% | 4734          | 3%  | 4553          | 3%  |
| Proteobacteria        | 2569          | 2%  | 1083          | 1%  | 11867         | 7%  |
| Verrucomicrobia       | 395           | 0%  | 0             | 0%  | 6083          | 3%  |
| Fusobacteria          | 0             | 0%  | 0             | 0%  | 0             | 0%  |
| Cyanobacteria         | 0             | 0%  | 0             | 0%  | 5314          | 3%  |
| Euryarchaeota         | 0             | 0%  | 0             | 0%  | 0             | 0%  |
| Tenericutes           | 0             | 0%  | 0             | 0%  | 0             | 0%  |
| Unclassified Bacteria | 24            | 0%  | 48            | 0%  | 15            | 0%  |
| Synergistetes         | 0             | 0%  | 20            | 0%  | 0             | 0%  |
| Lentisphaerae         | 0             | 0%  | 88            | 0%  | 0             | 0%  |
| Spirochaetes          | 0             | 0%  | 0             | 0%  | 0             | 0%  |
| Patescibacteria       | 0             | 0%  | 0             | 0%  | 0             | 0%  |
| Epsilonbacteraeota    | 0             | 0%  | 0             | 0%  | 0             | 0%  |
| <b>SUM</b>            | <b>121789</b> |     | <b>178003</b> |     | <b>177048</b> |     |

Phyla Composition (Figure 3)

| Week 0                |               |     |               |     |               |     |               |
|-----------------------|---------------|-----|---------------|-----|---------------|-----|---------------|
| Phyla                 | Subject2WK %  |     | Subject3WK %  |     | Subject4WK %  |     | Subject5WK    |
| Firmicutes            | 69271         | 62% | 123703        | 77% | 104302        | 68% | 63279         |
| Bacteroidetes         | 31591         | 28% | 30328         | 19% | 39976         | 26% | 41221         |
| Actinobacteria        | 8167          | 7%  | 2584          | 2%  | 7842          | 5%  | 7209          |
| Proteobacteria        | 1875          | 2%  | 3042          | 2%  | 600           | 0%  | 2293          |
| Verrucomicrobia       | 0             | 0%  | 0             | 0%  | 397           | 0%  | 0             |
| Fusobacteria          | 0             | 0%  | 0             | 0%  | 0             | 0%  | 0             |
| Cyanobacteria         | 0             | 0%  | 0             | 0%  | 0             | 0%  | 0             |
| Euryarchaeota         | 0             | 0%  | 0             | 0%  | 0             | 0%  | 0             |
| Tenericutes           | 0             | 0%  | 0             | 0%  | 0             | 0%  | 0             |
| Unclassified Bacteria | 0             | 0%  | 0             | 0%  | 69            | 0%  | 0             |
| Synergistetes         | 0             | 0%  | 0             | 0%  | 0             | 0%  | 0             |
| Lentisphaerae         | 0             | 0%  | 0             | 0%  | 27            | 0%  | 0             |
| Spirochaetes          | 0             | 0%  | 0             | 0%  | 0             | 0%  | 0             |
| Patescibacteria       | 0             | 0%  | 10            | 0%  | 8             | 0%  | 0             |
| Epsilonbacteraeota    | 0             | 0%  | 0             | 0%  | 0             | 0%  | 0             |
| <b>SUM</b>            | <b>110904</b> |     | <b>159667</b> |     | <b>153221</b> |     | <b>114002</b> |
| Week 12               |               |     |               |     |               |     |               |
| Phyla                 | Subject2WK %  |     | Subject3WK %  |     | Subject4WK %  |     | Subject5WK    |
| Firmicutes            | 66481         | 61% | 66962         | 61% | 76360         | 52% | 77961         |
| Bacteroidetes         | 30393         | 28% | 41313         | 38% | 59674         | 40% | 43885         |
| Actinobacteria        | 9079          | 8%  | 301           | 0%  | 9006          | 6%  | 3009          |
| Proteobacteria        | 2709          | 2%  | 436           | 0%  | 2149          | 1%  | 1960          |
| Verrucomicrobia       | 0             | 0%  | 0             | 0%  | 510           | 0%  | 0             |
| Fusobacteria          | 88            | 0%  | 0             | 0%  | 0             | 0%  | 0             |
| Cyanobacteria         | 0             | 0%  | 0             | 0%  | 0             | 0%  | 0             |
| Euryarchaeota         | 0             | 0%  | 0             | 0%  | 0             | 0%  | 0             |
| Tenericutes           | 0             | 0%  | 0             | 0%  | 0             | 0%  | 0             |
| Unclassified Bacteria | 0             | 0%  | 0             | 0%  | 172           | 0%  | 0             |
| Synergistetes         | 0             | 0%  | 0             | 0%  | 0             | 0%  | 0             |
| Lentisphaerae         | 0             | 0%  | 0             | 0%  | 62            | 0%  | 0             |
| Spirochaetes          | 0             | 0%  | 0             | 0%  | 0             | 0%  | 0             |
| Patescibacteria       | 0             | 0%  | 0             | 0%  | 16            | 0%  | 0             |
| Epsilonbacteraeota    | 0             | 0%  | 0             | 0%  | 0             | 0%  | 0             |
| <b>SUM</b>            | <b>108750</b> |     | <b>109012</b> |     | <b>147949</b> |     | <b>126815</b> |

Phyla Composition (Figure 3)

| Week 0                |     |               |              |               |     |               |
|-----------------------|-----|---------------|--------------|---------------|-----|---------------|
| Phyla                 | %   | Subject6WK %  | Subject18W % | Subject19W    |     |               |
| Firmicutes            | 56% | 84343         | 70%          | 95851         | 50% | 89136         |
| Bacteroidetes         | 36% | 18060         | 15%          | 69566         | 36% | 44290         |
| Actinobacteria        | 6%  | 8180          | 7%           | 17043         | 9%  | 5131          |
| Proteobacteria        | 2%  | 1977          | 2%           | 4463          | 2%  | 189           |
| Verrucomicrobia       | 0%  | 4069          | 3%           | 4456          | 2%  | 0             |
| Fusobacteria          | 0%  | 0             | 0%           | 0             | 0%  | 0             |
| Cyanobacteria         | 0%  | 0             | 0%           | 0             | 0%  | 21            |
| Euryarchaeota         | 0%  | 1502          | 1%           | 13            | 0%  | 0             |
| Tenericutes           | 0%  | 1635          | 1%           | 0             | 0%  | 0             |
| Unclassified Bacteria | 0%  | 76            | 0%           | 193           | 0%  | 24            |
| Synergistetes         | 0%  | 0             | 0%           | 0             | 0%  | 0             |
| Lentisphaerae         | 0%  | 0             | 0%           | 0             | 0%  | 0             |
| Spirochaetes          | 0%  | 0             | 0%           | 0             | 0%  | 0             |
| Patescibacteria       | 0%  | 0             | 0%           | 0             | 0%  | 0             |
| Epsilonbacteraeota    | 0%  | 0             | 0%           | 0             | 0%  | 0             |
| <b>SUM</b>            |     | <b>119842</b> |              | <b>191585</b> |     | <b>138791</b> |
| Week 12               |     |               |              |               |     |               |
| Phyla                 | %   | Subject6WK %  | Subject18W % | Subject19W    |     |               |
| Firmicutes            | 61% | 113239        | 70%          | 72311         | 53% | 88173         |
| Bacteroidetes         | 35% | 24926         | 15%          | 51890         | 38% | 55267         |
| Actinobacteria        | 2%  | 12897         | 8%           | 10160         | 7%  | 10552         |
| Proteobacteria        | 2%  | 4060          | 3%           | 2276          | 2%  | 649           |
| Verrucomicrobia       | 0%  | 3631          | 2%           | 0             | 0%  | 0             |
| Fusobacteria          | 0%  | 7             | 0%           | 0             | 0%  | 0             |
| Cyanobacteria         | 0%  | 0             | 0%           | 0             | 0%  | 0             |
| Euryarchaeota         | 0%  | 759           | 0%           | 0             | 0%  | 0             |
| Tenericutes           | 0%  | 1270          | 1%           | 0             | 0%  | 0             |
| Unclassified Bacteria | 0%  | 175           | 0%           | 107           | 0%  | 48            |
| Synergistetes         | 0%  | 0             | 0%           | 0             | 0%  | 0             |
| Lentisphaerae         | 0%  | 0             | 0%           | 0             | 0%  | 0             |
| Spirochaetes          | 0%  | 0             | 0%           | 0             | 0%  | 0             |
| Patescibacteria       | 0%  | 0             | 0%           | 0             | 0%  | 0             |
| Epsilonbacteraeota    | 0%  | 0             | 0%           | 0             | 0%  | 0             |
| <b>SUM</b>            |     | <b>160964</b> |              | <b>136744</b> |     | <b>154689</b> |

Phyla Composition (Figure 3)

| Week 0                |     |               |              |               |     |               |
|-----------------------|-----|---------------|--------------|---------------|-----|---------------|
| Phyla                 | %   | Subject20W %  | Subject7WK % | Subject21W    |     |               |
| Firmicutes            | 64% | 61975         | 56%          | 89527         | 66% | 116026        |
| Bacteroidetes         | 32% | 41871         | 38%          | 30431         | 23% | 27992         |
| Actinobacteria        | 4%  | 2096          | 2%           | 13307         | 10% | 6879          |
| Proteobacteria        | 0%  | 1437          | 1%           | 1512          | 1%  | 2672          |
| Verrucomicrobia       | 0%  | 109           | 0%           | 0             | 0%  | 0             |
| Fusobacteria          | 0%  | 0             | 0%           | 0             | 0%  | 0             |
| Cyanobacteria         | 0%  | 0             | 0%           | 0             | 0%  | 0             |
| Euryarchaeota         | 0%  | 1450          | 1%           | 0             | 0%  | 0             |
| Tenericutes           | 0%  | 256           | 0%           | 0             | 0%  | 0             |
| Unclassified Bacteria | 0%  | 356           | 0%           | 179           | 0%  | 0             |
| Synergistetes         | 0%  | 0             | 0%           | 0             | 0%  | 0             |
| Lentisphaerae         | 0%  | 213           | 0%           | 0             | 0%  | 0             |
| Spirochaetes          | 0%  | 15            | 0%           | 0             | 0%  | 0             |
| Patescibacteria       | 0%  | 0             | 0%           | 0             | 0%  | 0             |
| Epsilonbacteraeota    | 0%  | 0             | 0%           | 0             | 0%  | 0             |
| <b>SUM</b>            |     | <b>109778</b> |              | <b>134956</b> |     | <b>153569</b> |
| Week 12               |     |               |              |               |     |               |
| Phyla                 | %   | Subject20W %  | Subject7WK % | Subject21W    |     |               |
| Firmicutes            | 57% | 75912         | 58%          | 89759         | 55% | 92975         |
| Bacteroidetes         | 36% | 46912         | 36%          | 56898         | 35% | 54498         |
| Actinobacteria        | 7%  | 4049          | 3%           | 10003         | 6%  | 12269         |
| Proteobacteria        | 0%  | 2790          | 2%           | 6810          | 4%  | 3559          |
| Verrucomicrobia       | 0%  | 683           | 1%           | 0             | 0%  | 0             |
| Fusobacteria          | 0%  | 0             | 0%           | 0             | 0%  | 0             |
| Cyanobacteria         | 0%  | 0             | 0%           | 0             | 0%  | 0             |
| Euryarchaeota         | 0%  | 594           | 0%           | 0             | 0%  | 0             |
| Tenericutes           | 0%  | 208           | 0%           | 0             | 0%  | 0             |
| Unclassified Bacteria | 0%  | 42            | 0%           | 24            | 0%  | 56            |
| Synergistetes         | 0%  | 7             | 0%           | 0             | 0%  | 0             |
| Lentisphaerae         | 0%  | 10            | 0%           | 0             | 0%  | 0             |
| Spirochaetes          | 0%  | 0             | 0%           | 0             | 0%  | 0             |
| Patescibacteria       | 0%  | 5             | 0%           | 0             | 0%  | 0             |
| Epsilonbacteraeota    | 0%  | 0             | 0%           | 0             | 0%  | 0             |
| <b>SUM</b>            |     | <b>131212</b> |              | <b>163494</b> |     | <b>163357</b> |

Phyla Composition (Figure 3)

| Week 0                |     |               |              |               |     |               |
|-----------------------|-----|---------------|--------------|---------------|-----|---------------|
| Phyla                 | %   | Subject8WK %  | Subject9WK % | Subject10W    |     |               |
| Firmicutes            | 76% | 71844         | 56%          | 52490         | 61% | 82986         |
| Bacteroidetes         | 18% | 36372         | 28%          | 29727         | 34% | 31117         |
| Actinobacteria        | 4%  | 12885         | 10%          | 3081          | 4%  | 5169          |
| Proteobacteria        | 2%  | 7073          | 6%           | 1170          | 1%  | 4674          |
| Verrucomicrobia       | 0%  | 0             | 0%           | 0             | 0%  | 11            |
| Fusobacteria          | 0%  | 0             | 0%           | 0             | 0%  | 0             |
| Cyanobacteria         | 0%  | 0             | 0%           | 0             | 0%  | 1872          |
| Euryarchaeota         | 0%  | 0             | 0%           | 0             | 0%  | 0             |
| Tenericutes           | 0%  | 0             | 0%           | 0             | 0%  | 0             |
| Unclassified Bacteria | 0%  | 54            | 0%           | 21            | 0%  | 19            |
| Synergistetes         | 0%  | 0             | 0%           | 0             | 0%  | 0             |
| Lentisphaerae         | 0%  | 120           | 0%           | 0             | 0%  | 0             |
| Spirochaetes          | 0%  | 0             | 0%           | 0             | 0%  | 0             |
| Patescibacteria       | 0%  | 0             | 0%           | 0             | 0%  | 0             |
| Epsilonbacteraeota    | 0%  | 0             | 0%           | 0             | 0%  | 0             |
| <b>SUM</b>            |     | <b>128348</b> |              | <b>86489</b>  |     | <b>125848</b> |
| Week 12               |     |               |              |               |     |               |
| Phyla                 | %   | Subject8WK %  | Subject9WK % | Subject10W    |     |               |
| Firmicutes            | 57% | 86717         | 60%          | 49268         | 44% | 52061         |
| Bacteroidetes         | 33% | 43882         | 30%          | 54229         | 48% | 19331         |
| Actinobacteria        | 8%  | 9975          | 7%           | 4169          | 4%  | 786           |
| Proteobacteria        | 2%  | 3713          | 3%           | 5335          | 5%  | 3005          |
| Verrucomicrobia       | 0%  | 0             | 0%           | 0             | 0%  | 0             |
| Fusobacteria          | 0%  | 0             | 0%           | 0             | 0%  | 0             |
| Cyanobacteria         | 0%  | 0             | 0%           | 0             | 0%  | 3085          |
| Euryarchaeota         | 0%  | 0             | 0%           | 0             | 0%  | 0             |
| Tenericutes           | 0%  | 0             | 0%           | 0             | 0%  | 0             |
| Unclassified Bacteria | 0%  | 27            | 0%           | 0             | 0%  | 0             |
| Synergistetes         | 0%  | 0             | 0%           | 0             | 0%  | 0             |
| Lentisphaerae         | 0%  | 60            | 0%           | 0             | 0%  | 0             |
| Spirochaetes          | 0%  | 0             | 0%           | 0             | 0%  | 0             |
| Patescibacteria       | 0%  | 7             | 0%           | 0             | 0%  | 0             |
| Epsilonbacteraeota    | 0%  | 0             | 0%           | 0             | 0%  | 0             |
| <b>SUM</b>            |     | <b>144381</b> |              | <b>113001</b> |     | <b>78268</b>  |

Phyla Composition (Figure 3)

| Week 0                |     |               |              |               |     |               |
|-----------------------|-----|---------------|--------------|---------------|-----|---------------|
| Phyla                 | %   | Subject22W %  | Subject23W % | Subject24W    |     |               |
| Firmicutes            | 66% | 84301         | 68%          | 62993         | 75% | 117868        |
| Bacteroidetes         | 25% | 9065          | 7%           | 12150         | 14% | 21455         |
| Actinobacteria        | 4%  | 20998         | 17%          | 3733          | 4%  | 2163          |
| Proteobacteria        | 4%  | 1203          | 1%           | 3102          | 4%  | 2141          |
| Verrucomicrobia       | 0%  | 1125          | 1%           | 17            | 0%  | 128           |
| Fusobacteria          | 0%  | 0             | 0%           | 0             | 0%  | 0             |
| Cyanobacteria         | 1%  | 0             | 0%           | 1606          | 2%  | 0             |
| Euryarchaeota         | 0%  | 3590          | 3%           | 124           | 0%  | 0             |
| Tenericutes           | 0%  | 3215          | 3%           | 0             | 0%  | 0             |
| Unclassified Bacteria | 0%  | 963           | 1%           | 34            | 0%  | 12            |
| Synergistetes         | 0%  | 28            | 0%           | 3             | 0%  | 0             |
| Lentisphaerae         | 0%  | 356           | 0%           | 71            | 0%  | 0             |
| Spirochaetes          | 0%  | 0             | 0%           | 0             | 0%  | 0             |
| Patescibacteria       | 0%  | 0             | 0%           | 0             | 0%  | 0             |
| Epsilonbacteraeota    | 0%  | 0             | 0%           | 0             | 0%  | 0             |
| <b>SUM</b>            |     | <b>124844</b> |              | <b>83833</b>  |     | <b>143767</b> |
| Week 12               |     |               |              |               |     |               |
| Phyla                 | %   | Subject22W %  | Subject23W % | Subject24W    |     |               |
| Firmicutes            | 67% | 81089         | 70%          | 96242         | 75% | 86112         |
| Bacteroidetes         | 25% | 8522          | 7%           | 17633         | 14% | 37459         |
| Actinobacteria        | 1%  | 15290         | 13%          | 5644          | 4%  | 2190          |
| Proteobacteria        | 4%  | 1689          | 1%           | 5816          | 5%  | 2660          |
| Verrucomicrobia       | 0%  | 1263          | 1%           | 442           | 0%  | 1344          |
| Fusobacteria          | 0%  | 0             | 0%           | 0             | 0%  | 0             |
| Cyanobacteria         | 4%  | 0             | 0%           | 1419          | 1%  | 0             |
| Euryarchaeota         | 0%  | 1834          | 2%           | 356           | 0%  | 0             |
| Tenericutes           | 0%  | 2367          | 2%           | 40            | 0%  | 0             |
| Unclassified Bacteria | 0%  | 2369          | 2%           | 212           | 0%  | 4             |
| Synergistetes         | 0%  | 94            | 0%           | 16            | 0%  | 0             |
| Lentisphaerae         | 0%  | 556           | 0%           | 69            | 0%  | 0             |
| Spirochaetes          | 0%  | 0             | 0%           | 0             | 0%  | 0             |
| Patescibacteria       | 0%  | 0             | 0%           | 0             | 0%  | 0             |
| Epsilonbacteraeota    | 0%  | 0             | 0%           | 0             | 0%  | 0             |
| <b>SUM</b>            |     | <b>115073</b> |              | <b>127889</b> |     | <b>129769</b> |

Phyla Composition (Figure 3)

| Week 0                |     |               |              |               |     |               |
|-----------------------|-----|---------------|--------------|---------------|-----|---------------|
| Phyla                 | %   | Subject11W %  | Subject12W % | Subject25W    |     |               |
| Firmicutes            | 82% | 70115         | 66%          | 44198         | 57% | 74936         |
| Bacteroidetes         | 15% | 27750         | 26%          | 21767         | 28% | 20110         |
| Actinobacteria        | 2%  | 1085          | 1%           | 9629          | 13% | 43806         |
| Proteobacteria        | 1%  | 1667          | 2%           | 1197          | 2%  | 1720          |
| Verrucomicrobia       | 0%  | 5712          | 5%           | 141           | 0%  | 0             |
| Fusobacteria          | 0%  | 0             | 0%           | 0             | 0%  | 0             |
| Cyanobacteria         | 0%  | 0             | 0%           | 0             | 0%  | 0             |
| Euryarchaeota         | 0%  | 0             | 0%           | 0             | 0%  | 3322          |
| Tenericutes           | 0%  | 0             | 0%           | 0             | 0%  | 0             |
| Unclassified Bacteria | 0%  | 14            | 0%           | 23            | 0%  | 96            |
| Synergistetes         | 0%  | 0             | 0%           | 0             | 0%  | 199           |
| Lentisphaerae         | 0%  | 0             | 0%           | 0             | 0%  | 84            |
| Spirochaetes          | 0%  | 0             | 0%           | 0             | 0%  | 0             |
| Patescibacteria       | 0%  | 0             | 0%           | 0             | 0%  | 0             |
| Epsilonbacteraeota    | 0%  | 0             | 0%           | 0             | 0%  | 0             |
| <b>SUM</b>            |     | <b>106343</b> |              | <b>76955</b>  |     | <b>144273</b> |
| Week 12               |     |               |              |               |     |               |
| Phyla                 | %   | Subject11W %  | Subject12W % | Subject25W    |     |               |
| Firmicutes            | 66% | 71785         | 58%          | 61347         | 49% | 67641         |
| Bacteroidetes         | 29% | 46671         | 38%          | 41604         | 33% | 13810         |
| Actinobacteria        | 2%  | 338           | 0%           | 17941         | 14% | 19898         |
| Proteobacteria        | 2%  | 4161          | 3%           | 3558          | 3%  | 3108          |
| Verrucomicrobia       | 1%  | 0             | 0%           | 224           | 0%  | 823           |
| Fusobacteria          | 0%  | 0             | 0%           | 0             | 0%  | 4             |
| Cyanobacteria         | 0%  | 0             | 0%           | 0             | 0%  | 0             |
| Euryarchaeota         | 0%  | 0             | 0%           | 6             | 0%  | 791           |
| Tenericutes           | 0%  | 0             | 0%           | 0             | 0%  | 0             |
| Unclassified Bacteria | 0%  | 0             | 0%           | 33            | 0%  | 0             |
| Synergistetes         | 0%  | 0             | 0%           | 0             | 0%  | 5             |
| Lentisphaerae         | 0%  | 0             | 0%           | 0             | 0%  | 13            |
| Spirochaetes          | 0%  | 0             | 0%           | 0             | 0%  | 0             |
| Patescibacteria       | 0%  | 0             | 0%           | 0             | 0%  | 0             |
| Epsilonbacteraeota    | 0%  | 0             | 0%           | 0             | 0%  | 0             |
| <b>SUM</b>            |     | <b>122955</b> |              | <b>124713</b> |     | <b>106093</b> |

Phyla Composition (Figure 3)

| Week 0                |     |               |              |               |     |               |
|-----------------------|-----|---------------|--------------|---------------|-----|---------------|
| Phyla                 | %   | Subject13W %  | Subject26W % | Subject14W    |     |               |
| Firmicutes            | 52% | 74211         | 68%          | 68947         | 64% | 77352         |
| Bacteroidetes         | 14% | 26823         | 25%          | 28044         | 26% | 26181         |
| Actinobacteria        | 30% | 3951          | 4%           | 7069          | 7%  | 3438          |
| Proteobacteria        | 1%  | 1812          | 2%           | 2780          | 3%  | 2448          |
| Verrucomicrobia       | 0%  | 390           | 0%           | 0             | 0%  | 0             |
| Fusobacteria          | 0%  | 0             | 0%           | 0             | 0%  | 0             |
| Cyanobacteria         | 0%  | 0             | 0%           | 12            | 0%  | 0             |
| Euryarchaeota         | 2%  | 1830          | 2%           | 132           | 0%  | 0             |
| Tenericutes           | 0%  | 25            | 0%           | 0             | 0%  | 533           |
| Unclassified Bacteria | 0%  | 83            | 0%           | 12            | 0%  | 0             |
| Synergistetes         | 0%  | 13            | 0%           | 0             | 0%  | 0             |
| Lentisphaerae         | 0%  | 0             | 0%           | 0             | 0%  | 143           |
| Spirochaetes          | 0%  | 0             | 0%           | 0             | 0%  | 0             |
| Patescibacteria       | 0%  | 0             | 0%           | 0             | 0%  | 0             |
| Epsilonbacteraeota    | 0%  | 0             | 0%           | 0             | 0%  | 0             |
| <b>SUM</b>            |     | <b>109138</b> |              | <b>106996</b> |     | <b>110095</b> |
| Week 12               |     |               |              |               |     |               |
| Phyla                 | %   | Subject13W %  | Subject26W % | Subject14W    |     |               |
| Firmicutes            | 64% | 54038         | 68%          | 64098         | 56% | 91091         |
| Bacteroidetes         | 13% | 15539         | 20%          | 42834         | 37% | 17403         |
| Actinobacteria        | 19% | 1109          | 1%           | 3895          | 3%  | 4866          |
| Proteobacteria        | 3%  | 1905          | 2%           | 3628          | 3%  | 2191          |
| Verrucomicrobia       | 1%  | 4886          | 6%           | 0             | 0%  | 0             |
| Fusobacteria          | 0%  | 0             | 0%           | 0             | 0%  | 0             |
| Cyanobacteria         | 0%  | 260           | 0%           | 0             | 0%  | 0             |
| Euryarchaeota         | 1%  | 1612          | 2%           | 0             | 0%  | 0             |
| Tenericutes           | 0%  | 63            | 0%           | 0             | 0%  | 38            |
| Unclassified Bacteria | 0%  | 26            | 0%           | 24            | 0%  | 13            |
| Synergistetes         | 0%  | 42            | 0%           | 0             | 0%  | 0             |
| Lentisphaerae         | 0%  | 0             | 0%           | 0             | 0%  | 83            |
| Spirochaetes          | 0%  | 0             | 0%           | 0             | 0%  | 0             |
| Patescibacteria       | 0%  | 4             | 0%           | 0             | 0%  | 6             |
| Epsilonbacteraeota    | 0%  | 0             | 0%           | 0             | 0%  | 0             |
| <b>SUM</b>            |     | <b>79484</b>  |              | <b>114479</b> |     | <b>115691</b> |



Phyla Composition (Figure 3)

| Week 0                |     |               |              |               |     |  |
|-----------------------|-----|---------------|--------------|---------------|-----|--|
| Phyla                 | %   | Subject27W %  | Subject15W % |               |     |  |
| Firmicutes            | 70% | 90690         | 70%          | 67080         | 65% |  |
| Bacteroidetes         | 24% | 26347         | 20%          | 29918         | 29% |  |
| Actinobacteria        | 3%  | 7232          | 6%           | 2314          | 2%  |  |
| Proteobacteria        | 2%  | 4600          | 4%           | 2791          | 3%  |  |
| Verrucomicrobia       | 0%  | 184           | 0%           | 102           | 0%  |  |
| Fusobacteria          | 0%  | 0             | 0%           | 1229          | 1%  |  |
| Cyanobacteria         | 0%  | 0             | 0%           | 0             | 0%  |  |
| Euryarchaeota         | 0%  | 0             | 0%           | 0             | 0%  |  |
| Tenericutes           | 0%  | 0             | 0%           | 0             | 0%  |  |
| Unclassified Bacteria | 0%  | 0             | 0%           | 0             | 0%  |  |
| Synergistetes         | 0%  | 0             | 0%           | 0             | 0%  |  |
| Lentisphaerae         | 0%  | 0             | 0%           | 0             | 0%  |  |
| Spirochaetes          | 0%  | 0             | 0%           | 0             | 0%  |  |
| Patescibacteria       | 0%  | 0             | 0%           | 0             | 0%  |  |
| Epsilonbacteraeota    | 0%  | 0             | 0%           | 0             | 0%  |  |
| <b>SUM</b>            |     | <b>129053</b> |              | <b>103434</b> |     |  |
| Week 12               |     |               |              |               |     |  |
| Phyla                 | %   | Subject27W %  | Subject15W % |               |     |  |
| Firmicutes            | 79% | 93608         | 66%          | 75473         | 66% |  |
| Bacteroidetes         | 15% | 29781         | 21%          | 28777         | 25% |  |
| Actinobacteria        | 4%  | 7851          | 6%           | 983           | 1%  |  |
| Proteobacteria        | 2%  | 10236         | 7%           | 2726          | 2%  |  |
| Verrucomicrobia       | 0%  | 27            | 0%           | 0             | 0%  |  |
| Fusobacteria          | 0%  | 0             | 0%           | 5713          | 5%  |  |
| Cyanobacteria         | 0%  | 0             | 0%           | 0             | 0%  |  |
| Euryarchaeota         | 0%  | 0             | 0%           | 0             | 0%  |  |
| Tenericutes           | 0%  | 0             | 0%           | 0             | 0%  |  |
| Unclassified Bacteria | 0%  | 0             | 0%           | 0             | 0%  |  |
| Synergistetes         | 0%  | 0             | 0%           | 0             | 0%  |  |
| Lentisphaerae         | 0%  | 0             | 0%           | 0             | 0%  |  |
| Spirochaetes          | 0%  | 0             | 0%           | 0             | 0%  |  |
| Patescibacteria       | 0%  | 0             | 0%           | 0             | 0%  |  |
| Epsilonbacteraeota    | 0%  | 0             | 0%           | 2             | 0%  |  |
| <b>SUM</b>            |     | <b>141503</b> |              | <b>113674</b> |     |  |

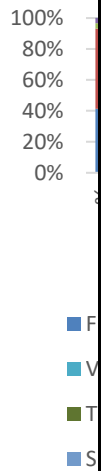

Phyla Composition (Figure 3)

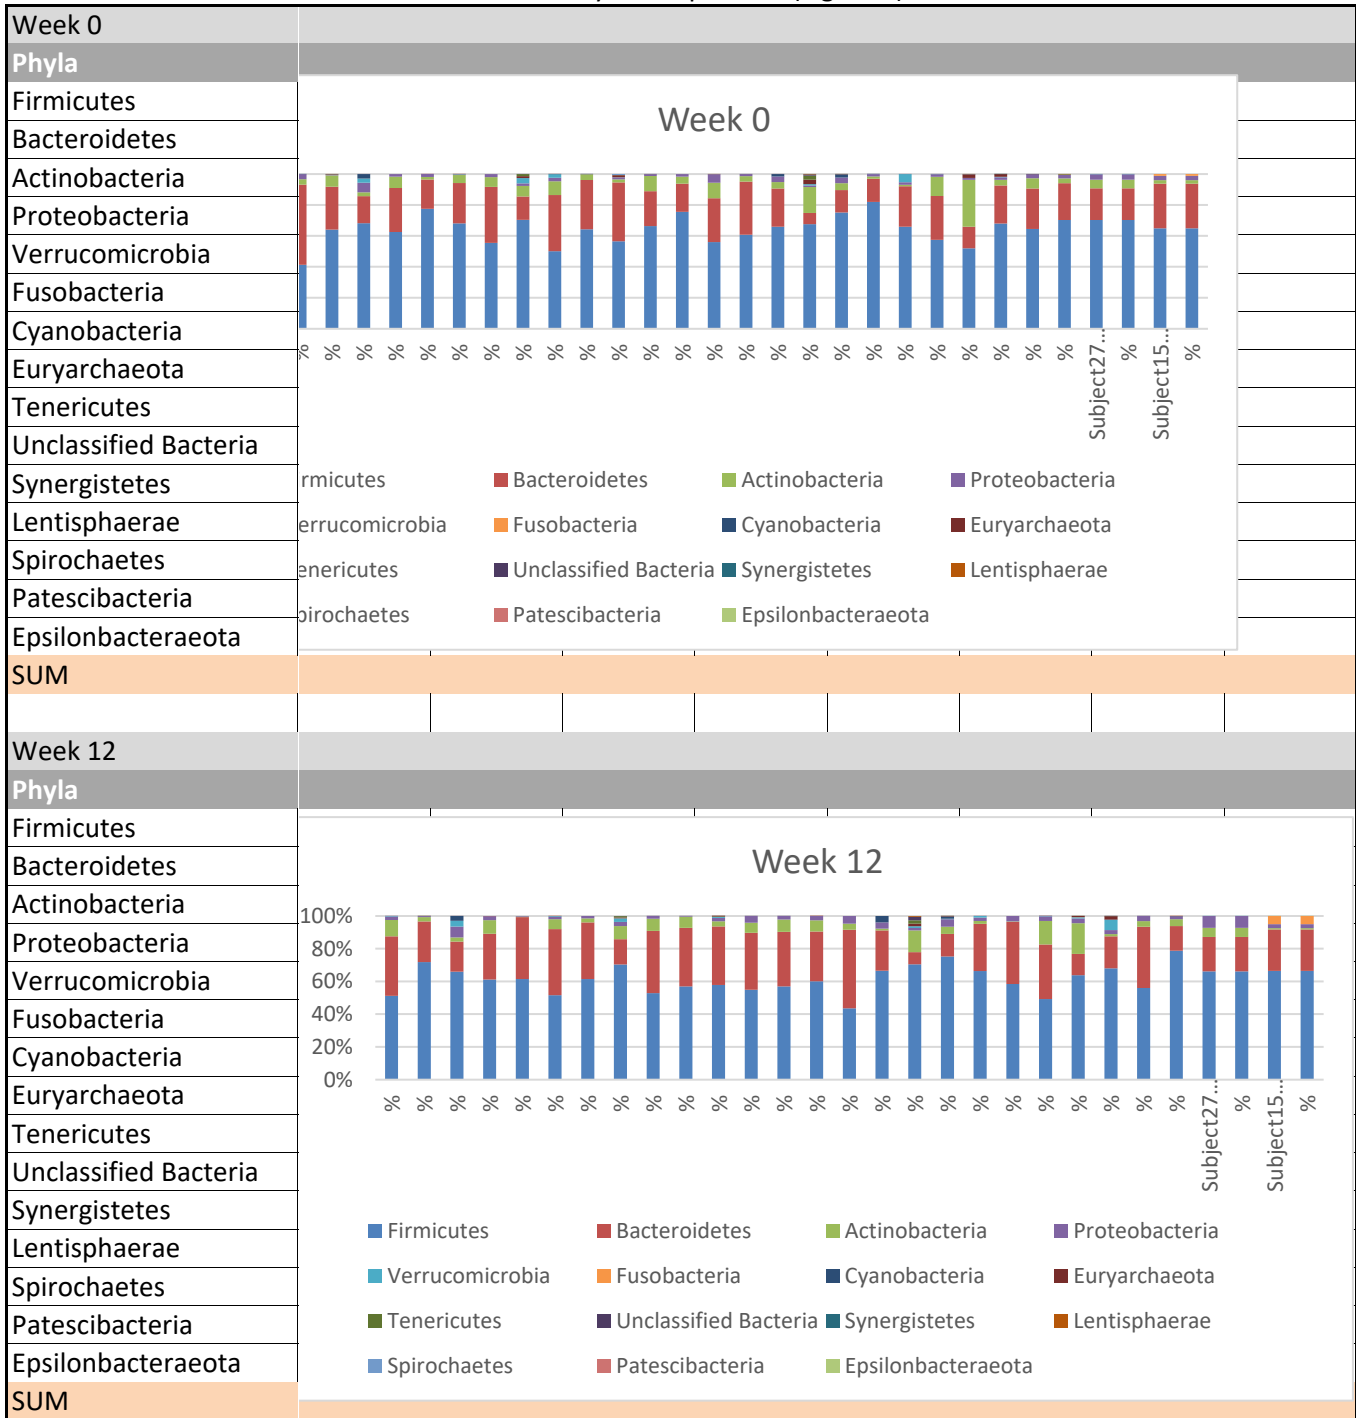

Colchicine Data Figure 4

| <b>Genus</b>                 | <b>WK0 mean counts</b> | <b>WK12 mean counts</b> | <b>fc</b>    | <b>WK0 num samples &gt; 0</b> |
|------------------------------|------------------------|-------------------------|--------------|-------------------------------|
| Sellimonas                   | 71.6875                | 24.6                    | 1.505563476  | 10                            |
| Terrisporobacter             | 71.125                 | 26.13333333             | 1.41043312   | 7                             |
| Defluviitaleaceae_UCG-011    | 9.3125                 | 3.666666667             | 1.143929793  | 6                             |
| Fusicatenibacter             | 1997.625               | 1266.333333             | 0.657211775  | 14                            |
| Bifidobacterium              | 2203.75                | 1294.933333             | 0.766623572  | 13                            |
| Lachnospiraceae_UCG-001      | 202.0625               | 80.26666667             | 1.321188213  | 11                            |
| Ruminococcaceae_UCG-009      | 10.375                 | 2.733333333             | 1.607330314  | 5                             |
| Angelakisella                | 14.75                  | 6.866666667             | 1.00152747   | 8                             |
| Lachnospiraceae_FCS020_group | 78.3125                | 56.6                    | 0.461479447  | 11                            |
| Ruminiclostridium_5          | 523                    | 358.6666667             | 0.542906353  | 16                            |
| Gordonibacter                | 25                     | 10.53333333             | 1.172702086  | 11                            |
| Subdoligranulum              | 2387.5625              | 1816.333333             | 0.394319566  | 15                            |
| Tyzzera                      | 62.125                 | 23.66666667             | 1.355648713  | 7                             |
| Lactobacillus                | 105.5625               | 27.66666667             | 1.89425377   | 12                            |
| Acidaminococcus              | 313.8125               | 402.4666667             | -0.357956661 | 5                             |
| Eggerthella                  | 161.5625               | 63.93333333             | 1.323963317  | 11                            |
| Lachnoclostridium            | 975.5                  | 1347.6                  | -0.465770554 | 16                            |
| Tyzzera_3                    | 63.875                 | 114.5333333             | -0.832574615 | 5                             |
| Bilophila                    | 161.4375               | 193.2666667             | -0.258153648 | 14                            |
| Escherichia/Shigella         | 122.375                | 139.6666667             | -0.189230414 | 9                             |
| Allisonella                  | 15.4375                | 4.333333333             | 1.62388149   | 4                             |
| Gastranaerophilales Order    | 213.4375               | 370.8                   | -0.793969549 | 2                             |
| Sutterella                   | 412.3125               | 745.6                   | -0.853102512 | 9                             |
| Firmicutes Phylum            | 17.5                   | 11.2                    | 0.600644123  | 9                             |
| Ruminococcus_1               | 1329.6875              | 932.7333333             | 0.511089315  | 14                            |
| Roseburia                    | 1608.1875              | 979.2                   | 0.715184385  | 16                            |
| Haemophilus                  | 9.6875                 | 4.066666667             | 1.076815597  | 6                             |
| Dorea                        | 1151.75                | 927.4                   | 0.312261238  | 13                            |
| Catabacter                   | 1.5625                 | 0.8                     | 0.509555098  | 5                             |
| Bacteroidales Order          | 12.4375                | 8.666666667             | 0.475174355  | 3                             |
| Atopobium                    | 0.6875                 | 2.066666667             | -0.861783858 | 2                             |
| Coprococcus_3                | 409.375                | 398.4                   | 0.039108512  | 9                             |
| Lachnospiraceae_NK4B4_group  | 16.9375                | 12                      | 0.464467209  | 4                             |

Colchicine Data Figure 4

| <b>Genus</b>                 | <b>WK12 num samples &gt; 0</b> | <b>p.value</b> | <b>bonferroni</b> | <b>lfd</b>  |
|------------------------------|--------------------------------|----------------|-------------------|-------------|
| Sellimonas                   | 8                              | 0.0035         | 0.4706            | 0.163666235 |
| Terrisporobacter             | 6                              | 0.0091         | 1                 | 0.195763418 |
| Defluviitaleaceae_UCG-011    | 3                              | 0.0152         | 1                 | 0.227713603 |
| Fusicatenibacter             | 13                             | 0.0156         | 1                 | 0.229423933 |
| Bifidobacterium              | 9                              | 0.0164         | 1                 | 0.233622318 |
| Lachnospiraceae_UCG-001      | 10                             | 0.0184         | 1                 | 0.242989712 |
| Ruminococcaceae_UCG-009      | 3                              | 0.0262         | 1                 | 0.277809409 |
| Angelakisella                | 5                              | 0.0269         | 1                 | 0.280653912 |
| Lachnospiraceae_FCS020_group | 10                             | 0.0271         | 1                 | 0.28151598  |
| Ruminiclostridium_5          | 15                             | 0.0356         | 1                 | 0.315488254 |
| Gordonibacter                | 9                              | 0.0358         | 1                 | 0.316298429 |
| Subdoligranulum              | 14                             | 0.0381         | 1                 | 0.324836935 |
| Tyzzera                      | 6                              | 0.0403         | 1                 | 0.333073945 |
| Lactobacillus                | 11                             | 0.0425         | 1                 | 0.340971087 |
| Acidaminococcus              | 4                              | 0.0462         | 1                 | 0.353808549 |
| Eggerthella                  | 10                             | 0.0506         | 1                 | 0.368331546 |
| Lachnoclostridium            | 15                             | 0.0535         | 1                 | 0.377577486 |
| Tyzzera_3                    | 6                              | 0.0751         | 1                 | 0.439641883 |
| Bilophila                    | 13                             | 0.0826         | 1                 | 0.458414965 |
| Escherichia/Shigella         | 15                             | 0.0832         | 1                 | 0.459768511 |
| Allisonella                  | 3                              | 0.0837         | 1                 | 0.460965345 |
| Gastranaerophilales Order    | 3                              | 0.0838         | 1                 | 0.461280253 |
| Sutterella                   | 8                              | 0.0913         | 1                 | 0.478784219 |
| Firmicutes Phylum            | 7                              | 0.1046         | 1                 | 0.507019242 |
| Ruminococcus_1               | 11                             | 0.1054         | 1                 | 0.508553657 |
| Roseburia                    | 15                             | 0.1118         | 1                 | 0.520972599 |
| Haemophilus                  | 3                              | 0.1128         | 1                 | 0.52296833  |
| Dorea                        | 13                             | 0.1243         | 1                 | 0.543476312 |
| Catabacter                   | 2                              | 0.1364         | 1                 | 0.563023136 |
| Bacteroidales Order          | 3                              | 0.1575         | 1                 | 0.592688523 |
| Atopobium                    | 4                              | 0.1609         | 1                 | 0.59686606  |
| Coprococcus_3                | 9                              | 0.1656         | 1                 | 0.60258821  |
| Lachnospiraceae_NK4B4_group  | 5                              | 0.1823         | 1                 | 0.620975343 |

Colchicine Data Figure 4

| Genus                                  | WK0 mean counts | WK12 mean counts | fc           | WK0 num samples > 0 |
|----------------------------------------|-----------------|------------------|--------------|---------------------|
| Veillonella                            | 24.1875         | 10.6             | 1.118583128  | 10                  |
| Bacteroides                            | 15927.5625      | 18822.33333      | -0.240906056 | 16                  |
| Lachnospiraceae_UCG-004                | 156.25          | 306              | -0.965178638 | 15                  |
| Anaerofustis                           | 3.0625          | 2.2              | 0.344295908  | 4                   |
| Family_XIII_AD3011_group               | 56.5625         | 45.06666667      | 0.321406041  | 15                  |
| CAG-56                                 | 132.4375        | 263.8666667      | -0.989102128 | 9                   |
| Tyzzarella_4                           | 35.75           | 79.4             | -1.129451251 | 3                   |
| Negativibacillus                       | 129.375         | 113.4666667      | 0.187739714  | 13                  |
| Erysipelotrichaceae Family             | 50.25           | 30.93333333      | 0.682488849  | 10                  |
| Ruminiclostridium_6                    | 319.75          | 159.5333333      | 0.998576374  | 9                   |
| Clostridiales Order                    | 117.1875        | 180              | -0.614912239 | 11                  |
| Ruminococcaceae_UCG-014                | 336.125         | 282.4            | 0.250443858  | 8                   |
| Anaerostipes                           | 1236.1875       | 1473.133333      | -0.252802858 | 16                  |
| DTU089                                 | 10.5625         | 10.06666667      | 0.063232625  | 10                  |
| Erysipelotrichaceae_UCG-003            | 406.6875        | 479.2            | -0.23617168  | 12                  |
| Candidatus_Soleaferrea                 | 7.625           | 5.6              | 0.386058432  | 12                  |
| Coprococcus_2                          | 213.1875        | 192.0666667      | 0.149775185  | 4                   |
| Bacteria                               | 19.875          | 17.86666667      | 0.145936645  | 11                  |
| Parabacteroides                        | 1446.4375       | 1400.8           | 0.046220525  | 16                  |
| Caproiciproducens                      | 0.8125          | 2.2              | -0.82009091  | 2                   |
| Lactococcus                            | 11.0625         | 5.8              | 0.826922291  | 11                  |
| Romboutsia                             | 134.3125        | 93.4             | 0.519436355  | 11                  |
| Ruminiclostridium_9                    | 147.4375        | 94.8             | 0.631758047  | 14                  |
| Anaerofilum                            | 1.3125          | 1.133333333      | 0.116343961  | 3                   |
| Faecalibacterium                       | 4944.875        | 4864.6           | 0.023608057  | 14                  |
| Granulicatella                         | 5.6875          | 5.8              | -0.02406776  | 6                   |
| Oscillibacter                          | 115.5625        | 95.13333333      | 0.277995062  | 16                  |
| Butyricoccus                           | 273.25          | 315.8666667      | -0.20838428  | 16                  |
| Phascolarctobacterium                  | 721.3125        | 936.2            | -0.375733817 | 11                  |
| Collinsella                            | 1476.9375       | 1662.266667      | -0.170434229 | 12                  |
| Coriobacteriales_Incertae_Sedis Family | 44.1875         | 54.86666667      | -0.306064001 | 11                  |
| Barnesiella                            | 299.8125        | 411.0666667      | -0.454013246 | 7                   |
| Erysipelatoclostridium                 | 163.4375        | 117.6            | 0.471435334  | 12                  |

Colchicine Data Figure 4

| <b>Genus</b>                           | <b>WK12 num samples &gt; 0</b> | <b>p.value</b> | <b>bonferroni</b> | <b>lfd</b>  |
|----------------------------------------|--------------------------------|----------------|-------------------|-------------|
| Veillonella                            | 5                              | 0.1860         | 1                 | 0.624720717 |
| Bacteroides                            | 15                             | 0.1914         | 1                 | 0.629883361 |
| Lachnospiraceae_UCG-004                | 14                             | 0.1914         | 1                 | 0.629883361 |
| Anaerofustis                           | 2                              | 0.1935         | 1                 | 0.631757421 |
| Family_XIII_AD3011_group               | 11                             | 0.2009         | 1                 | 0.638258269 |
| CAG-56                                 | 9                              | 0.2046         | 1                 | 0.641298963 |
| Tyzzarella_4                           | 5                              | 0.2057         | 1                 | 0.642213095 |
| Negativibacillus                       | 11                             | 0.2059         | 1                 | 0.642345375 |
| Erysipelotrichaceae Family             | 13                             | 0.2111         | 1                 | 0.646381055 |
| Ruminiclostridium_6                    | 7                              | 0.2152         | 1                 | 0.649412608 |
| Clostridiales Order                    | 8                              | 0.2335         | 1                 | 0.661240204 |
| Ruminococcaceae_UCG-014                | 9                              | 0.2499         | 1                 | 0.669695131 |
| Anaerostipes                           | 15                             | 0.2679         | 1                 | 0.676881528 |
| DTU089                                 | 7                              | 0.2694         | 1                 | 0.677412666 |
| Erysipelotrichaceae_UCG-003            | 12                             | 0.2778         | 1                 | 0.680003148 |
| Candidatus_Soleaferrea                 | 8                              | 0.2874         | 1                 | 0.6824845   |
| Coprococcus_2                          | 3                              | 0.3014         | 1                 | 0.685247355 |
| Bacteria                               | 8                              | 0.3232         | 1                 | 0.68772968  |
| Parabacteroides                        | 15                             | 0.3341         | 1                 | 0.688235364 |
| Caproiciproducens                      | 3                              | 0.3372         | 1                 | 0.688300569 |
| Lactococcus                            | 6                              | 0.3574         | 1                 | 0.688300569 |
| Romboutsia                             | 10                             | 0.3608         | 1                 | 0.688300569 |
| Ruminiclostridium_9                    | 14                             | 0.3633         | 1                 | 0.688300569 |
| Anaerofilum                            | 3                              | 0.3757         | 1                 | 0.688300569 |
| Faecalibacterium                       | 14                             | 0.3785         | 1                 | 0.688300569 |
| Granulicatella                         | 7                              | 0.3985         | 1                 | 0.688300569 |
| Oscillibacter                          | 15                             | 0.4100         | 1                 | 0.688300569 |
| Butyricoccus                           | 15                             | 0.4100         | 1                 | 0.688300569 |
| Phascolarctobacterium                  | 11                             | 0.4209         | 1                 | 0.688300569 |
| Collinsella                            | 12                             | 0.4239         | 1                 | 0.688300569 |
| Coriobacteriales_Incertae_Sedis Family | 9                              | 0.4548         | 1                 | 0.688300569 |
| Barnesiella                            | 7                              | 0.4559         | 1                 | 0.688300569 |
| Erysipelatoclostridium                 | 10                             | 0.4578         | 1                 | 0.688300569 |

Colchicine Data Figure 4

| <b>Genus</b>                  | <b>WK0 mean counts</b> | <b>WK12 mean counts</b> | <b>fc</b>    | <b>WK0 num samples &gt; 0</b> |
|-------------------------------|------------------------|-------------------------|--------------|-------------------------------|
| Lachnospiraceae_UCG-010       | 81.375                 | 118.7333333             | -0.539546384 | 13                            |
| Rhodospirillales Order        | 274.9375               | 364.2666667             | -0.40460857  | 9                             |
| Intestinibacter               | 166.875                | 312.5333333             | -0.901231432 | 12                            |
| Actinomyces                   | 9.5625                 | 7.2                     | 0.365255527  | 13                            |
| GCA-900066575                 | 27.4375                | 24.73333333             | 0.144156293  | 12                            |
| Eggerthellaceae Family        | 12.6875                | 29.6                    | -1.160672688 | 3                             |
| Howardella                    | 9.375                  | 8.133333333             | 0.183897944  | 3                             |
| Victivallis                   | 11.875                 | 8.266666667             | 0.47445005   | 3                             |
| Gemella                       | 1.25                   | 2.066666667             | -0.446746359 | 3                             |
| Peptococcaceae Family         | 15.25                  | 11                      | 0.437405312  | 5                             |
| Eisenbergiella                | 29                     | 20.13333333             | 0.505442161  | 7                             |
| Streptococcus                 | 393.4375               | 234.2                   | 0.745908658  | 16                            |
| Ruminococcaceae_UCG-010       | 79.3125                | 110.7333333             | -0.476363194 | 6                             |
| Family_XIII_UCG-001           | 22                     | 22.13333333             | -0.008339301 | 12                            |
| Ruminococcaceae_UCG-003       | 77.8125                | 80.4                    | -0.046604329 | 9                             |
| Flavonifractor                | 98.875                 | 67.8                    | 0.537715033  | 16                            |
| Saccharimonadaceae Family     | 1.1875                 | 0.8                     | 0.28128611   | 3                             |
| Veillonellaceae Family        | 8.3125                 | 9.133333333             | -0.121868397 | 3                             |
| Agathobacter                  | 5169                   | 4572.066667             | 0.177002329  | 16                            |
| Intestinimonas                | 42.375                 | 46.2                    | -0.121923102 | 14                            |
| Akkermansia                   | 607.75                 | 643.4666667             | -0.082255874 | 9                             |
| Clostridia Class              | 96.0625                | 63.6                    | 0.587379855  | 4                             |
| Shuttleworthia                | 2.4375                 | 1.4                     | 0.518325308  | 4                             |
| Faecalitalea                  | 72.0625                | 23.53333333             | 1.574387854  | 7                             |
| Methanobrevibacter            | 143.5625               | 126.4                   | 0.182328083  | 2                             |
| Paraprevotella                | 190.375                | 184.1333333             | 0.047837701  | 3                             |
| Slackia                       | 52.25                  | 29.73333333             | 0.792977275  | 3                             |
| Lachnospiraceae_UCG-008       | 1.625                  | 1.733333333             | -0.058343986 | 3                             |
| Alistipes                     | 1223.125               | 1286.866667             | -0.073232354 | 14                            |
| Adlercreutzia                 | 170.0625               | 133.9333333             | 0.34227674   | 13                            |
| Lachnospiraceae_NK4A136_group | 390.9375               | 476                     | -0.283365652 | 15                            |
| Ruminococcaceae Family        | 969.125                | 1137.466667             | -0.230849496 | 16                            |
| Holdemanella                  | 415.8125               | 453.3333333             | -0.124352612 | 5                             |

Colchicine Data Figure 4

| <b>Genus</b>                  | <b>WK12 num samples &gt; 0</b> | <b>p.value</b> | <b>bonferroni</b> | <b>lfd</b>  |
|-------------------------------|--------------------------------|----------------|-------------------|-------------|
| Lachnospiraceae_UCG-010       | 14                             | 0.4600         | 1                 | 0.688300569 |
| Rhodospirillales Order        | 8                              | 0.4693         | 1                 | 0.688300569 |
| Intestinibacter               | 12                             | 0.4776         | 1                 | 0.688300569 |
| Actinomyces                   | 9                              | 0.4941         | 1                 | 0.688300569 |
| GCA-900066575                 | 10                             | 0.4942         | 1                 | 0.688300569 |
| Eggerthellaceae Family        | 2                              | 0.5101         | 1                 | 0.688300569 |
| Howardella                    | 3                              | 0.5101         | 1                 | 0.688300569 |
| Victivallis                   | 3                              | 0.5101         | 1                 | 0.688300569 |
| Gemella                       | 5                              | 0.5157         | 1                 | 0.688300569 |
| Peptococcaceae Family         | 5                              | 0.5158         | 1                 | 0.688300569 |
| Eisenbergiella                | 9                              | 0.5267         | 1                 | 0.688300569 |
| Streptococcus                 | 15                             | 0.5321         | 1                 | 0.688300569 |
| Ruminococcaceae_UCG-010       | 6                              | 0.5387         | 1                 | 0.688300569 |
| Family_XIII_UCG-001           | 11                             | 0.5458         | 1                 | 0.688300569 |
| Ruminococcaceae_UCG-003       | 9                              | 0.5465         | 1                 | 0.688300569 |
| Flavonifractor                | 13                             | 0.5509         | 1                 | 0.688300569 |
| Saccharimonadaceae Family     | 2                              | 0.5637         | 1                 | 0.688300569 |
| Veillonellaceae Family        | 3                              | 0.5644         | 1                 | 0.688300569 |
| Agathobacter                  | 15                             | 0.5701         | 1                 | 0.688300569 |
| Intestinimonas                | 12                             | 0.5701         | 1                 | 0.688300569 |
| Akkermansia                   | 5                              | 0.5873         | 1                 | 0.688300569 |
| Clostridia Class              | 5                              | 0.6080         | 1                 | 0.688300569 |
| Shuttleworthia                | 2                              | 0.6080         | 1                 | 0.688300569 |
| Faecalitalea                  | 5                              | 0.6191         | 1                 | 0.688300569 |
| Methanobrevibacter            | 3                              | 0.6213         | 1                 | 0.688300569 |
| Paraprevotella                | 3                              | 0.6213         | 1                 | 0.688300569 |
| Slackia                       | 3                              | 0.6213         | 1                 | 0.688300569 |
| Lachnospiraceae_UCG-008       | 2                              | 0.6213         | 1                 | 0.688300569 |
| Alistipes                     | 13                             | 0.6286         | 1                 | 0.688300569 |
| Adlercreutzia                 | 11                             | 0.6286         | 1                 | 0.688300569 |
| Lachnospiraceae_NK4A136_group | 12                             | 0.6291         | 1                 | 0.688300569 |
| Ruminococcaceae Family        | 15                             | 0.6496         | 1                 | 0.688300569 |
| Holdemanella                  | 5                              | 0.6566         | 1                 | 0.688300569 |



Colchicine Data Figure 4

| <b>Genus</b>                         | <b>WK0 mean counts</b> | <b>WK12 mean counts</b> | <b>fc</b>    | <b>WK0 num samples &gt; 0</b> |
|--------------------------------------|------------------------|-------------------------|--------------|-------------------------------|
| Coprobacter                          | 36.4375                | 42.86666667             | -0.228640985 | 5                             |
| Phoceia                              | 7                      | 7.733333333             | -0.126532406 | 9                             |
| Family_XIII Family                   | 26.75                  | 15                      | 0.794415866  | 11                            |
| Lachnospira                          | 699.4375               | 580.2                   | 0.269221622  | 16                            |
| Ruminococcaceae_UCG-005              | 136.8125               | 227.5333333             | -0.729697858 | 11                            |
| Megasphaera                          | 810.6875               | 579.0666667             | 0.484705678  | 5                             |
| Enterobacteriaceae Family            | 33.9375                | 8.2                     | 1.925070612  | 3                             |
| Odoribacter                          | 157.3125               | 162.7333333             | -0.048572888 | 11                            |
| Butyricimonas                        | 68.25                  | 63.13333333             | 0.110739678  | 7                             |
| Ruminococcaceae_UCG-004              | 150.375                | 130                     | 0.208560148  | 15                            |
| Lachnospiraceae_ND3007_group         | 445.875                | 468.8666667             | -0.072380087 | 13                            |
| Lachnospiraceae Family               | 5930.8125              | 6007.333333             | -0.018491858 | 16                            |
| Ruminococcaceae_UCG-002              | 492.5                  | 553.4                   | -0.167877173 | 13                            |
| Christensenellaceae Family           | 14.6875                | 10.73333333             | 0.419002531  | 12                            |
| Christensenellaceae_R-7_group        | 289.5                  | 342.4                   | -0.241351876 | 12                            |
| Marvinbryantia                       | 61.5                   | 62                      | -0.011495639 | 10                            |
| Parasutterella                       | 627.375                | 628.8666667             | -0.00342068  | 10                            |
| Clostridium_sensu_stricto_1          | 206.3125               | 150.5333333             | 0.452171924  | 11                            |
| Ruminococcaceae_UCG-013              | 436.25                 | 405.1333333             | 0.106504943  | 16                            |
| Anaerotruncus                        | 4.8125                 | 8.533333333             | -0.71382193  | 7                             |
| Ruminococcus_2                       | 2165.5625              | 1792.2                  | 0.272871451  | 11                            |
| UBA1819                              | 27.9375                | 28.13333333             | -0.009730491 | 15                            |
| GCA-900066225                        | 9.25                   | 6.666666667             | 0.418952549  | 5                             |
| Hungatella                           | 8                      | 13.73333333             | -0.711086962 | 5                             |
| Clostridiales_vadinBB60_group Family | 59.25                  | 65.86666667             | -0.150325959 | 9                             |
| Desulfovibrio                        | 148.8125               | 98                      | 0.597657574  | 7                             |
| Ruminococcaceae_NK4A214_group        | 84.25                  | 79.33333333             | 0.085701094  | 7                             |
| Coprococcus_1                        | 84                     | 82.46666667             | 0.026262685  | 6                             |
| Turicibacter                         | 30.8125                | 86.86666667             | -1.465722213 | 8                             |
| Oscillospira                         | 17.875                 | 25.8                    | -0.505756356 | 9                             |
| Dialister                            | 330.6875               | 256.5333333             | 0.365065467  | 7                             |
| Senegalimassilia                     | 62                     | 77.8                    | -0.322843801 | 4                             |
| Holdemania                           | 10.25                  | 9.533333333             | 0.094962944  | 11                            |

Colchicine Data Figure 4

| <b>Genus</b>                         | <b>WK12 num samples &gt; 0</b> | <b>p.value</b> | <b>bonferroni</b> | <b>lfd</b>  |
|--------------------------------------|--------------------------------|----------------|-------------------|-------------|
| Coprobacter                          | 5                              | 0.6566         | 1                 | 0.688300569 |
| Phoceia                              | 8                              | 0.6626         | 1                 | 0.688300569 |
| Family_XIII Family                   | 9                              | 0.6893         | 1                 | 0.688300569 |
| Lachnospira                          | 15                             | 0.6909         | 1                 | 0.688300569 |
| Ruminococcaceae_UCG-005              | 8                              | 0.7057         | 1                 | 0.688300569 |
| Megasphaera                          | 5                              | 0.7068         | 1                 | 0.688300569 |
| Enterobacteriaceae Family            | 2                              | 0.7068         | 1                 | 0.688300569 |
| Odoribacter                          | 11                             | 0.7086         | 1                 | 0.688300569 |
| Butyricimonas                        | 6                              | 0.7093         | 1                 | 0.688300569 |
| Ruminococcaceae_UCG-004              | 14                             | 0.7119         | 1                 | 0.688300569 |
| Lachnospiraceae_ND3007_group         | 12                             | 0.7318         | 1                 | 0.688300569 |
| Lachnospiraceae Family               | 15                             | 0.7333         | 1                 | 0.688300569 |
| Ruminococcaceae_UCG-002              | 11                             | 0.7543         | 1                 | 0.688300569 |
| Christensenellaceae Family           | 8                              | 0.7737         | 1                 | 0.688300569 |
| Christensenellaceae_R-7_group        | 10                             | 0.7752         | 1                 | 0.688300569 |
| Marvinbryantia                       | 10                             | 0.7937         | 1                 | 0.688300569 |
| Parasutterella                       | 10                             | 0.7937         | 1                 | 0.688300569 |
| Clostridium_sensu_stricto_1          | 12                             | 0.8193         | 1                 | 0.688300569 |
| Ruminococcaceae_UCG-013              | 15                             | 0.8203         | 1                 | 0.688300569 |
| Anaerotruncus                        | 7                              | 0.8387         | 1                 | 0.688300569 |
| Ruminococcus_2                       | 7                              | 0.8389         | 1                 | 0.688300569 |
| UBA1819                              | 11                             | 0.8422         | 1                 | 0.688300569 |
| GCA-900066225                        | 4                              | 0.8460         | 1                 | 0.689824861 |
| Hungatella                           | 7                              | 0.8564         | 1                 | 0.696135158 |
| Clostridiales_vadinBB60_group Family | 8                              | 0.8594         | 1                 | 0.698103719 |
| Desulfovibrio                        | 6                              | 0.8715         | 1                 | 0.706789032 |
| Ruminococcaceae_NK4A214_group        | 6                              | 0.8715         | 1                 | 0.706789032 |
| Coprococcus_1                        | 7                              | 0.8765         | 1                 | 0.710878106 |
| Turicibacter                         | 5                              | 0.9040         | 1                 | 0.739458061 |
| Oscillospira                         | 8                              | 0.9060         | 1                 | 0.742144583 |
| Dialister                            | 5                              | 0.9227         | 1                 | 0.768443624 |
| Senegalimassilia                     | 4                              | 0.9412         | 1                 | 0.811620536 |
| Holdemania                           | 10                             | 0.9772         | 1                 | 1           |

Colchicine Data Figure 4

| <b>Genus</b>            | <b>WK0 mean counts</b> | <b>WK12 mean counts</b> | <b>fc</b>    | <b>WK0 num samples &gt; 0</b> |
|-------------------------|------------------------|-------------------------|--------------|-------------------------------|
| Blautia                 | 7346.5625              | 6749.666667             | 0.122235742  | 16                            |
| Burkholderiaceae Family | 15.125                 | 26.8                    | -0.785785722 | 4                             |
| DNF00809                | 3.375                  | 3.933333333             | -0.173279753 | 3                             |

Placebo Data - Figure 4

| Genus                       | WK0 mean counts | WK12 mean counts | fc           | WK0 num samples > 0 |
|-----------------------------|-----------------|------------------|--------------|---------------------|
| Lachnospiraceae             | 745.75          | 675.7857143      | 0.141926216  | 12                  |
| Dialister                   | 278.5833333     | 284.6428571      | -0.030934093 | 4                   |
| Prevotella_9                | 4402.666667     | 2858.5           | 0.622942363  | 5                   |
| Ruminococcaceae_UCG-003     | 172.0833333     | 122.2857143      | 0.489461173  | 9                   |
| Lachnospiraceae_UCG-001     | 144.8333333     | 50.14285714      | 1.511715851  | 9                   |
| Escherichia/Shigella        | 37.08333333     | 501.9285714      | -3.723121851 | 6                   |
| Fusicatenibacter            | 1342.166667     | 900.0714286      | 0.575924953  | 11                  |
| Odoribacter                 | 94.41666667     | 161.5714286      | -0.768760538 | 8                   |
| GCA-900066575               | 17.91666667     | 19.57142857      | -0.120984093 | 8                   |
| Oscillibacter               | 48.25           | 100.8571429      | -1.048351525 | 10                  |
| Butyricicoccus              | 276.0833333     | 409.9285714      | -0.568567708 | 12                  |
| Flavonifractor              | 61.66666667     | 117.4285714      | -0.918247018 | 9                   |
| Dorea                       | 1191            | 1062             | 0.165242639  | 11                  |
| Intestinimonas              | 38.16666667     | 61.07142857      | -0.664302999 | 10                  |
| Methanobrevibacter          | 377.6666667     | 164.7142857      | 1.192230451  | 6                   |
| Victivallis                 | 12.83333333     | 6.5              | 0.883186335  | 4                   |
| Anaerofilum                 | 1.5             | 0.785714286      | 0.485426827  | 3                   |
| Bacteroidales Order         | 66.75           | 11.92857143      | 2.389658076  | 3                   |
| Veillonellaceae Family      | 27.16666667     | 19.64285714      | 0.448346175  | 3                   |
| Lachnospiraceae_NK4B4_group | 5.916666667     | 0.214285714      | 2.509969011  | 3                   |
| Eggerthellaceae Family      | 20.83333333     | 9.785714286      | 1.017410684  | 3                   |
| Prevotella_2                | 711             | 1092.285714      | -0.618721331 | 3                   |
| Tyzzrella_3                 | 25.58333333     | 93.85714286      | -1.835234396 | 1                   |
| Hungatella                  | 14.08333333     | 22.64285714      | -0.648449098 | 3                   |
| Lactobacillus               | 1746.916667     | 1404.857143      | 0.314186403  | 10                  |
| Gordonibacter               | 23.58333333     | 24.28571429      | -0.040641984 | 7                   |
| Erysipelatoclostridium      | 47.25           | 65.35714286      | -0.459722827 | 9                   |
| Faecalitalea                | 15.91666667     | 70.78571429      | -2.085251448 | 5                   |
| Anaerostipes                | 657.6666667     | 1071.5           | -0.703357202 | 12                  |
| Romboutsia                  | 97.75           | 55.71428571      | 0.800068568  | 9                   |
| Lactococcus                 | 0.833333333     | 10.07142857      | -2.594300365 | 2                   |
| Paraprevotella              | 203.75          | 101.0714286      | 1.004284363  | 5                   |
| DNF00809                    | 6.25            | 1                | 1.857980995  | 3                   |

Placebo Data - Figure 4

| <b>Genus</b>                | <b>WK12 num samples &gt; 0</b> | <b>p.value</b> | <b>bonferroni</b> | <b>lfd</b> |
|-----------------------------|--------------------------------|----------------|-------------------|------------|
| Lachnoclostridium           | 13                             | 0.0096         | 1                 | 0.6063     |
| Dialister                   | 5                              | 0.0268         | 1                 | 0.6063     |
| Prevotella_9                | 5                              | 0.0268         | 1                 | 0.6063     |
| Ruminococcaceae_UCG-003     | 11                             | 0.0323         | 1                 | 0.6063     |
| Lachnospiraceae_UCG-001     | 8                              | 0.0323         | 1                 | 0.6063     |
| Escherichia/Shigella        | 11                             | 0.0340         | 1                 | 0.6063     |
| Fusicatenibacter            | 13                             | 0.0453         | 1                 | 0.6099     |
| Odoribacter                 | 11                             | 0.0474         | 1                 | 0.6147     |
| GCA-900066575               | 9                              | 0.0538         | 1                 | 0.6295     |
| Oscillibacter               | 14                             | 0.0596         | 1                 | 0.6437     |
| Butyricicoccus              | 14                             | 0.0597         | 1                 | 0.6440     |
| Flavonifractor              | 12                             | 0.0651         | 1                 | 0.6572     |
| Dorea                       | 13                             | 0.0773         | 1                 | 0.6885     |
| Intestinimonas              | 13                             | 0.0809         | 1                 | 0.6976     |
| Methanobrevibacter          | 5                              | 0.0829         | 1                 | 0.7027     |
| Victivallis                 | 4                              | 0.0839         | 1                 | 0.7053     |
| Anaerofilum                 | 1                              | 0.0839         | 1                 | 0.7053     |
| Bacteroidales Order         | 2                              | 0.0841         | 1                 | 0.7058     |
| Veillonellaceae Family      | 2                              | 0.0841         | 1                 | 0.7058     |
| Lachnospiraceae_NK4B4_group | 1                              | 0.0841         | 1                 | 0.7058     |
| Eggerthellaceae Family      | 2                              | 0.0841         | 1                 | 0.7058     |
| Prevotella_2                | 4                              | 0.0841         | 1                 | 0.7058     |
| Tyzzrella_3                 | 4                              | 0.0841         | 1                 | 0.7058     |
| Hungatella                  | 3                              | 0.0841         | 1                 | 0.7058     |
| Lactobacillus               | 13                             | 0.1075         | 1                 | 0.7651     |
| Gordonibacter               | 9                              | 0.1099         | 1                 | 0.7708     |
| Erysipelatoclostridium      | 9                              | 0.1127         | 1                 | 0.7779     |
| Faecalitalea                | 7                              | 0.1176         | 1                 | 0.7898     |
| Anaerostipes                | 14                             | 0.1361         | 1                 | 0.8332     |
| Romboutsia                  | 10                             | 0.1464         | 1                 | 0.8561     |
| Lactococcus                 | 7                              | 0.1513         | 1                 | 0.8667     |
| Paraprevotella              | 5                              | 0.1565         | 1                 | 0.8776     |
| DNF00809                    | 1                              | 0.1577         | 1                 | 0.8801     |

Placebo Data - Figure 4

| Genus                       | WK0 mean counts | WK12 mean counts | fc           | WK0 num samples > 0 |
|-----------------------------|-----------------|------------------|--------------|---------------------|
| Lachnospiraceae_UCG-008     | 2.083333333     | 1                | 0.624490865  | 2                   |
| Desulfovibrionaceae Family  | 2.25            | 6                | -1.106915204 | 2                   |
| Enterococcus                | 2.833333333     | 1.571428571      | 0.576029376  | 2                   |
| CAG-352                     | 242.4166667     | 535.9285714      | -1.141302224 | 2                   |
| Alloprevotella              | 86.16666667     | 223.1428571      | -1.362570079 | 2                   |
| Coprobacter                 | 5               | 9.071428571      | -0.74723393  | 2                   |
| Weissella                   | 0.75            | 1.785714286      | -0.670692375 | 2                   |
| Akkermansia                 | 209.5           | 274.2857143      | -0.387109511 | 6                   |
| Family_XIII Family          | 9.916666667     | 5.357142857      | 0.780081992  | 5                   |
| Bacteroides                 | 11090.5         | 14101.78571      | -0.346525679 | 12                  |
| Family_XIII_AD3011_group    | 62.75           | 81.92857143      | -0.379443898 | 10                  |
| Clostridium_sensu_stricto_1 | 171.75          | 64.71428571      | 1.394406772  | 11                  |
| Subdoligranulum             | 1575.166667     | 1770.428571      | -0.168493197 | 10                  |
| Turicibacter                | 18.83333333     | 7.428571429      | 1.234567135  | 6                   |
| Streptococcus               | 853.75          | 1882.214286      | -1.139622747 | 12                  |
| Lachnospira                 | 517.6666667     | 340.9285714      | 0.601112676  | 12                  |
| Lachnospiraceae_UCG-004     | 206.8333333     | 163.3571429      | 0.338592903  | 12                  |
| Phoceae                     | 6.666666667     | 15.14285714      | -1.074224585 | 7                   |
| Alistipes                   | 1229.083333     | 1014.714286      | 0.276261418  | 11                  |
| Slackia                     | 57.08333333     | 97.64285714      | -0.764090337 | 4                   |
| Ruminococcaceae_UCG-011     | 3.25            | 0.571428571      | 1.435386145  | 3                   |
| GCA-900066225               | 8.416666667     | 3.071428571      | 1.20968137   | 6                   |
| Eggerthella                 | 118.8333333     | 114.3571429      | 0.054921932  | 9                   |
| Izimaplasmatales Order      | 143.1666667     | 104.5            | 0.450494633  | 3                   |
| Acidaminococcus             | 288.9166667     | 461.8571429      | -0.674928713 | 3                   |
| Dielma                      | 0.75            | 1.428571429      | -0.472752997 | 2                   |
| Agathobacter                | 4604.916667     | 3977.642857      | 0.211211908  | 12                  |
| Anaerotruncus               | 9.833333333     | 5.214285714      | 0.801816739  | 5                   |
| Desulfovibrio               | 144.5833333     | 245.9285714      | -0.762248574 | 7                   |
| Howardella                  | 16.91666667     | 13.21428571      | 0.33396065   | 4                   |
| Candidatus_Stoquefichus     | 27.33333333     | 39.64285714      | -0.520501485 | 4                   |
| Granulicatella              | 6.666666667     | 5                | 0.353636955  | 6                   |
| Adlercreutzia               | 56.66666667     | 62.14285714      | -0.13088191  | 7                   |

Placebo Data - Figure 4

| <b>Genus</b>                | <b>WK12 num samples &gt; 0</b> | <b>p.value</b> | <b>bonferroni</b> | <b>lfr</b> |
|-----------------------------|--------------------------------|----------------|-------------------|------------|
| Lachnospiraceae_UCG-008     | 2                              | 0.1577         | 1                 | 0.8801     |
| Desulfovibrionaceae Family  | 2                              | 0.1577         | 1                 | 0.8801     |
| Enterococcus                | 2                              | 0.1577         | 1                 | 0.8801     |
| CAG-352                     | 2                              | 0.1577         | 1                 | 0.8801     |
| Alloprevotella              | 2                              | 0.1577         | 1                 | 0.8801     |
| Coprobacter                 | 2                              | 0.1577         | 1                 | 0.8801     |
| Weissella                   | 2                              | 0.1577         | 1                 | 0.8801     |
| Akkermansia                 | 9                              | 0.1721         | 1                 | 0.9088     |
| Family_XIII Family          | 6                              | 0.1761         | 1                 | 0.9164     |
| Bacteroides                 | 14                             | 0.1823         | 1                 | 0.9280     |
| Family_XIII_AD3011_group    | 12                             | 0.1938         | 1                 | 0.9481     |
| Clostridium_sensu_stricto_1 | 8                              | 0.1952         | 1                 | 0.9504     |
| Subdoligranulum             | 12                             | 0.2222         | 1                 | 0.9919     |
| Turicibacter                | 9                              | 0.2342         | 1                 | 1.0000     |
| Streptococcus               | 14                             | 0.2393         | 1                 | 1.0000     |
| Lachnospira                 | 14                             | 0.2393         | 1                 | 1.0000     |
| Lachnospiraceae_UCG-004     | 13                             | 0.2393         | 1                 | 1.0000     |
| Phoceia                     | 9                              | 0.2528         | 1                 | 1.0000     |
| Alistipes                   | 13                             | 0.2550         | 1                 | 1.0000     |
| Slackia                     | 6                              | 0.2558         | 1                 | 1.0000     |
| Ruminococcaceae_UCG-011     | 2                              | 0.2558         | 1                 | 1.0000     |
| GCA-900066225               | 5                              | 0.2962         | 1                 | 1.0000     |
| Eggerthella                 | 9                              | 0.2964         | 1                 | 1.0000     |
| Izimaplasmatales Order      | 2                              | 0.2975         | 1                 | 1.0000     |
| Acidaminococcus             | 3                              | 0.2975         | 1                 | 1.0000     |
| Dielma                      | 3                              | 0.2975         | 1                 | 1.0000     |
| Agathobacter                | 14                             | 0.3078         | 1                 | 1.0000     |
| Anaerotruncus               | 5                              | 0.3152         | 1                 | 1.0000     |
| Desulfovibrio               | 9                              | 0.3351         | 1                 | 1.0000     |
| Howardella                  | 5                              | 0.3436         | 1                 | 1.0000     |
| Candidatus_Stoquefichus     | 4                              | 0.3436         | 1                 | 1.0000     |
| Granulicatella              | 7                              | 0.3449         | 1                 | 1.0000     |
| Adlercreutzia               | 8                              | 0.3457         | 1                 | 1.0000     |

Placebo Data - Figure 4

| <b>Genus</b>                         | <b>WK0 mean counts</b> | <b>WK12 mean counts</b> | <b>fc</b>    | <b>WK0 num samples &gt; 0</b> |
|--------------------------------------|------------------------|-------------------------|--------------|-------------------------------|
| Enterobacteriaceae Family            | 154.0833333            | 365.3571429             | -1.240207095 | 6                             |
| Coriobacteriales Order               | 7.333333333            | 12.21428571             | -0.665132849 | 3                             |
| Clostridiales_vadinBB60_group Family | 279.5833333            | 224.8571429             | 0.313018775  | 7                             |
| Ruminococcaceae_UCG-008              | 32.91666667            | 27.57142857             | 0.247421216  | 3                             |
| Sellimonas                           | 96.41666667            | 82.42857143             | 0.223627077  | 5                             |
| Tyzzarella                           | 7                      | 21.42857143             | -1.487265827 | 5                             |
| Ruminococcaceae_UCG-002              | 1000.25                | 728.0714286             | 0.457670172  | 10                            |
| Christensenellaceae_R-7_group        | 633.5833333            | 443.3571429             | 0.514089952  | 10                            |
| Holdemanella                         | 570.4166667            | 312.8571429             | 0.864435074  | 6                             |
| Coprococcus_2                        | 426.4166667            | 421.8571429             | 0.015472817  | 5                             |
| Ruminococcaceae_UCG-014              | 194.5833333            | 143.2857143             | 0.43885497   | 5                             |
| Butyricimonas                        | 39.33333333            | 77.64285714             | -0.963343095 | 6                             |
| CAG-56                               | 122.5833333            | 136.9285714             | -0.158437145 | 8                             |
| Candidatus_Soleaferrea               | 10.5                   | 7                       | 0.523561956  | 10                            |
| Parabacteroides                      | 866.1666667            | 851.2857143             | 0.024972151  | 11                            |
| Haemophilus                          | 46.33333333            | 18.78571429             | 1.258397375  | 7                             |
| Ruminococcus_1                       | 801                    | 655.1428571             | 0.28959228   | 8                             |
| Coprococcus_1                        | 156.6666667            | 164.5                   | -0.069953534 | 9                             |
| Ruminiclostridium_9                  | 140.6666667            | 179                     | -0.345496566 | 12                            |
| Lachnospiraceae_NK4A136_group        | 287.9166667            | 258.4285714             | 0.155316055  | 12                            |
| Acetanaerobacterium                  | 1                      | 0.5                     | 0.415037499  | 2                             |
| Senegalimassilia                     | 92.33333333            | 83.78571429             | 0.138571219  | 3                             |
| Leuconostoc                          | 2.916666667            | 1.428571429             | 0.689518432  | 2                             |
| Megasphaera                          | 162.4166667            | 717.6428571             | -2.136719845 | 3                             |
| Oscillospira                         | 4.333333333            | 4.785714286             | -0.117457582 | 2                             |
| Ruminococcaceae_UCG-013              | 252.3333333            | 195.0714286             | 0.369657596  | 11                            |
| Ruminococcus_2                       | 3124.333333            | 1572.714286             | 0.989836432  | 9                             |
| Lachnospiraceae_ND3007_group         | 298.9166667            | 289.5                   | 0.046023533  | 9                             |
| Gardnerella                          | 8.333333333            | 2.714285714             | 1.329307625  | 3                             |
| Bifidobacterium                      | 2467                   | 2183.142857             | 0.176275174  | 9                             |
| Ruminococcaceae_UCG-004              | 190.0833333            | 158.7142857             | 0.258708588  | 11                            |
| Muribaculaceae Family                | 85.75                  | 64.71428571             | 0.400656724  | 3                             |
| Burkholderiaceae Family              | 13.16666667            | 7.5                     | 0.736965594  | 2                             |



Placebo Data - Figure 4

| <b>Genus</b>                         | <b>WK12 num samples &gt; 0</b> | <b>p.value</b> | <b>bonferroni</b> | <b>lfr</b> |
|--------------------------------------|--------------------------------|----------------|-------------------|------------|
| Enterobacteriaceae Family            | 4                              | 0.3457         | 1                 | 1.0000     |
| Coriobacteriales Order               | 4                              | 0.3680         | 1                 | 1.0000     |
| Clostridiales_vadinBB60_group Family | 8                              | 0.3769         | 1                 | 1.0000     |
| Ruminococcaceae_UCG-008              | 4                              | 0.3940         | 1                 | 1.0000     |
| Sellimonas                           | 3                              | 0.3940         | 1                 | 1.0000     |
| Tyzzarella                           | 4                              | 0.3974         | 1                 | 1.0000     |
| Ruminococcaceae_UCG-002              | 12                             | 0.4083         | 1                 | 1.0000     |
| Christensenellaceae_R-7_group        | 12                             | 0.4083         | 1                 | 1.0000     |
| Holdemanella                         | 5                              | 0.4216         | 1                 | 1.0000     |
| Coprococcus_2                        | 5                              | 0.4216         | 1                 | 1.0000     |
| Ruminococcaceae_UCG-014              | 5                              | 0.4216         | 1                 | 1.0000     |
| Butyricimonas                        | 8                              | 0.4216         | 1                 | 1.0000     |
| CAG-56                               | 10                             | 0.4218         | 1                 | 1.0000     |
| Candidatus_Soleaferrea               | 9                              | 0.4313         | 1                 | 1.0000     |
| Parabacteroides                      | 13                             | 0.4558         | 1                 | 1.0000     |
| Haemophilus                          | 8                              | 0.4697         | 1                 | 1.0000     |
| Ruminococcus_1                       | 9                              | 0.4754         | 1                 | 1.0000     |
| Coprococcus_1                        | 11                             | 0.4754         | 1                 | 1.0000     |
| Ruminiclostridium_9                  | 14                             | 0.4797         | 1                 | 1.0000     |
| Lachnospiraceae_NK4A136_group        | 10                             | 0.4802         | 1                 | 1.0000     |
| Acetanaerobacterium                  | 2                              | 0.4959         | 1                 | 1.0000     |
| Senegalimassilia                     | 4                              | 0.4962         | 1                 | 1.0000     |
| Leuconostoc                          | 2                              | 0.4962         | 1                 | 1.0000     |
| Megasphaera                          | 3                              | 0.4962         | 1                 | 1.0000     |
| Oscillospira                         | 3                              | 0.4962         | 1                 | 1.0000     |
| Ruminococcaceae_UCG-013              | 13                             | 0.5046         | 1                 | 1.0000     |
| Ruminococcus_2                       | 9                              | 0.5258         | 1                 | 1.0000     |
| Lachnospiraceae_ND3007_group         | 10                             | 0.5258         | 1                 | 1.0000     |
| Gardnerella                          | 1                              | 0.5297         | 1                 | 1.0000     |
| Bifidobacterium                      | 11                             | 0.5548         | 1                 | 1.0000     |
| Ruminococcaceae_UCG-004              | 12                             | 0.5560         | 1                 | 1.0000     |
| Muribaculaceae Family                | 4                              | 0.5648         | 1                 | 1.0000     |
| Burkholderiaceae Family              | 4                              | 0.5648         | 1                 | 1.0000     |

Placebo Data - Figure 4

| Genus                         | WK0 mean counts | WK12 mean counts | fc           | WK0 num samples > 0 |
|-------------------------------|-----------------|------------------|--------------|---------------------|
| Caproiciproducens             | 3.166666667     | 1.857142857      | 0.544320516  | 2                   |
| Ezakiella                     | 3.333333333     | 1.285714286      | 0.922832139  | 2                   |
| Peptoniphilus                 | 0.583333333     | 1.928571429      | -0.88723207  | 1                   |
| Ruminococcaceae_NK4A214_group | 188.5           | 216.9285714      | -0.201657504 | 8                   |
| Lachnospiraceae Family        | 6021.166667     | 5853             | 0.04085989   | 12                  |
| Ruminococcaceae Family        | 1430.416667     | 1486.857143      | -0.055792329 | 12                  |
| Ruminiclostridium_6           | 410.75          | 432.3571429      | -0.073787834 | 7                   |
| Marvinbryantia                | 87.41666667     | 65.42857143      | 0.412514456  | 10                  |
| Clostridiales Order           | 155.0833333     | 167.4285714      | -0.109820397 | 9                   |
| Faecalibacterium              | 4195.666667     | 3479.142857      | 0.270097348  | 11                  |
| Coprococcus_3                 | 511.4166667     | 537.8571429      | -0.072585448 | 11                  |
| Ruminiclostridium_5           | 635.8333333     | 473.2857143      | 0.425159437  | 12                  |
| Angelakisella                 | 13.83333333     | 10.21428571      | 0.403505103  | 6                   |
| Ruminococcaceae_UCG-009       | 21.58333333     | 15.42857143      | 0.459051412  | 5                   |
| DTU089                        | 13.75           | 10.42857143      | 0.368069877  | 8                   |
| Parasutterella                | 212.25          | 365.9285714      | -0.782953505 | 8                   |
| Prevotella_7                  | 105.9166667     | 89.35714286      | 0.242776207  | 3                   |
| Defluviitaleaceae_UCG-011     | 2.25            | 1.928571429      | 0.150242636  | 3                   |
| Fournierella                  | 17.41666667     | 16.07142857      | 0.109428173  | 3                   |
| Gemella                       | 1.833333333     | 2.214285714      | -0.181997834 | 2                   |
| Intestinibacter               | 279.4166667     | 265              | 0.076145853  | 12                  |
| Eisenbergiella                | 46.91666667     | 56               | -0.250434369 | 5                   |
| Coprobacillus                 | 7.25            | 4.5              | 0.584962501  | 3                   |
| Phascolarctobacterium         | 1481.916667     | 1449.5           | 0.031887231  | 9                   |
| Bilophila                     | 95.08333333     | 94.85714286      | 0.003400263  | 9                   |
| Collinsella                   | 3176.75         | 3520.5           | -0.148184453 | 10                  |
| Barnesiella                   | 141.9166667     | 198.7857143      | -0.483279256 | 5                   |
| Negativibacillus              | 211.25          | 225.3571429      | -0.092836279 | 11                  |
| UBA1819                       | 31.41666667     | 66.14285714      | -1.05049818  | 11                  |
| Peptococcaceae Family         | 22.25           | 18.28571429      | 0.269698136  | 7                   |
| Christensenellaceae Family    | 13.83333333     | 11.35714286      | 0.263497625  | 9                   |
| Erysipelotrichaceae_UCG-003   | 204.8333333     | 194.9285714      | 0.071148841  | 9                   |
| Ruminococcaceae_UCG-005       | 525.25          | 404.3571429      | 0.376554763  | 9                   |

Placebo Data - Figure 4

| <b>Genus</b>                  | <b>WK12 num samples &gt; 0</b> | <b>p.value</b> | <b>bonferroni</b> | <b>lfr</b> |
|-------------------------------|--------------------------------|----------------|-------------------|------------|
| Caproiciproducens             | 3                              | 0.5648         | 1                 | 1.0000     |
| Ezakiella                     | 2                              | 0.5648         | 1                 | 1.0000     |
| Peptoniphilus                 | 3                              | 0.5648         | 1                 | 1.0000     |
| Ruminococcaceae_NK4A214_group | 10                             | 0.5739         | 1                 | 1.0000     |
| Lachnospiraceae Family        | 14                             | 0.5829         | 1                 | 1.0000     |
| Ruminococcaceae Family        | 14                             | 0.5829         | 1                 | 1.0000     |
| Ruminiclostridium_6           | 8                              | 0.6015         | 1                 | 1.0000     |
| Marvinbryantia                | 11                             | 0.6087         | 1                 | 1.0000     |
| Clostridiales Order           | 11                             | 0.6087         | 1                 | 1.0000     |
| Faecalibacterium              | 13                             | 0.6098         | 1                 | 1.0000     |
| Coprococcus_3                 | 13                             | 0.6098         | 1                 | 1.0000     |
| Ruminiclostridium_5           | 14                             | 0.6100         | 1                 | 1.0000     |
| Angelakisella                 | 7                              | 0.6293         | 1                 | 1.0000     |
| Ruminococcaceae_UCG-009       | 7                              | 0.6296         | 1                 | 1.0000     |
| DTU089                        | 6                              | 0.6297         | 1                 | 1.0000     |
| Parasutterella                | 11                             | 0.6342         | 1                 | 1.0000     |
| Prevotella_7                  | 3                              | 0.6376         | 1                 | 1.0000     |
| Defluviitaleaceae_UCG-011     | 2                              | 0.6376         | 1                 | 1.0000     |
| Fournierella                  | 2                              | 0.6376         | 1                 | 1.0000     |
| Gemella                       | 4                              | 0.6376         | 1                 | 1.0000     |
| Intestinibacter               | 14                             | 0.6379         | 1                 | 1.0000     |
| Eisenbergiella                | 3                              | 0.6579         | 1                 | 1.0000     |
| Coprobacillus                 | 3                              | 0.6579         | 1                 | 1.0000     |
| Phascolarctobacterium         | 11                             | 0.6917         | 1                 | 1.0000     |
| Bilophila                     | 9                              | 0.6917         | 1                 | 1.0000     |
| Collinsella                   | 12                             | 0.7231         | 1                 | 1.0000     |
| Barnesiella                   | 7                              | 0.7232         | 1                 | 1.0000     |
| Negativibacillus              | 12                             | 0.7239         | 1                 | 1.0000     |
| UBA1819                       | 13                             | 0.7239         | 1                 | 1.0000     |
| Peptococcaceae Family         | 5                              | 0.7428         | 1                 | 1.0000     |
| Christensenellaceae Family    | 9                              | 0.7527         | 1                 | 1.0000     |
| Erysipelotrichaceae_UCG-003   | 11                             | 0.7828         | 1                 | 1.0000     |
| Ruminococcaceae_UCG-005       | 12                             | 0.7828         | 1                 | 1.0000     |

Placebo Data - Figure 4

| <b>Genus</b>                           | <b>WK0 mean counts</b> | <b>WK12 mean counts</b> | <b>fc</b>    | <b>WK0 num samples &gt; 0</b> |
|----------------------------------------|------------------------|-------------------------|--------------|-------------------------------|
| Mogibacterium                          | 41.08333333            | 29.92857143             | 0.444308784  | 3                             |
| Actinomyces                            | 7.333333333            | 18.64285714             | -1.237039197 | 7                             |
| Veillonella                            | 41.58333333            | 43.21428571             | -0.054223697 | 8                             |
| Roseburia                              | 933.4166667            | 1247.071429             | -0.417562592 | 12                            |
| Holdemania                             | 8.5                    | 7.714285714             | 0.124545098  | 7                             |
| Lachnospiraceae_FCS020_group           | 89.25                  | 87.78571429             | 0.023599368  | 10                            |
| Firmicutes Phylum                      | 33.75                  | 32.35714286             | 0.059017255  | 9                             |
| Raoultibacter                          | 6.75                   | 3.714285714             | 0.717157113  | 3                             |
| Clostridia Class                       | 86.75                  | 64.21428571             | 0.428211092  | 4                             |
| Family_XIII_UCG-001                    | 14.91666667            | 14.57142857             | 0.031636925  | 7                             |
| Ruminococcaceae_UCG-010                | 92.58333333            | 76.92857143             | 0.264099247  | 8                             |
| Blautia                                | 5347.666667            | 5546.285714             | -0.052602737 | 12                            |
| Terrisporobacter                       | 128                    | 59.78571429             | 1.085566856  | 6                             |
| Allisonella                            | 23.08333333            | 41.21428571             | -0.809696216 | 6                             |
| Rhodospirillales Order                 | 199.1666667            | 236.7857143             | -0.248460298 | 4                             |
| Cloacibacillus                         | 12.5                   | 5.642857143             | 1.023083613  | 3                             |
| Sutterella                             | 563.6666667            | 504.5                   | 0.159688377  | 8                             |
| Coriobacteriales_Incertae_Sedis Family | 25.5                   | 22.28571429             | 0.186547222  | 7                             |
| Prevotellaceae Family                  | 25.16666667            | 116.6428571             | -2.168611669 | 2                             |
| Enterorhabdus                          | 19.16666667            | 14.42857143             | 0.386368156  | 2                             |
| Rikenellaceae_RC9_gut_group            | 75.83333333            | 37.14285714             | 1.01031943   | 2                             |
| Methanosphaera                         | 44.41666667            | 32.78571429             | 0.426808468  | 2                             |
| Mollicutes_RF39 Order                  | 42.5                   | 19.14285714             | 1.110747066  | 2                             |
| Eubacterium                            | 3.666666667            | 1.071428571             | 1.171766348  | 1                             |
| Bacteroidia Class                      | 2.333333333            | 3                       | -0.263034406 | 1                             |
| GCA-900066755                          | 1                      | 0.642857143             | 0.283792966  | 2                             |
| Catenibacterium                        | 801.0833333            | 673.1428571             | 0.250697791  | 6                             |
| Tyzzereella_4                          | 33                     | 23.64285714             | 0.464365212  | 5                             |
| Erysipelotrichaceae Family             | 32.75                  | 38.21428571             | -0.21649182  | 9                             |
| Lachnospiraceae_UCG-010                | 55.5                   | 62.71428571             | -0.173366015 | 10                            |
| Bacteria                               | 90.25                  | 137.2142857             | -0.599010275 | 10                            |

Placebo Data - Figure 4

| <b>Genus</b>                           | <b>WK12 num samples &gt; 0</b> | <b>p.value</b> | <b>bonferroni</b> | <b>lfd</b> |
|----------------------------------------|--------------------------------|----------------|-------------------|------------|
| Mogibacterium                          | 6                              | 0.7905         | 1                 | 1.0000     |
| Actinomyces                            | 7                              | 0.8056         | 1                 | 1.0000     |
| Veillonella                            | 9                              | 0.8119         | 1                 | 1.0000     |
| Roseburia                              | 12                             | 0.8139         | 1                 | 1.0000     |
| Holdemania                             | 5                              | 0.8376         | 1                 | 1.0000     |
| Lachnospiraceae_FCS020_group           | 12                             | 0.8439         | 1                 | 1.0000     |
| Firmicutes Phylum                      | 8                              | 0.8439         | 1                 | 1.0000     |
| Raoultibacter                          | 3                              | 0.8498         | 1                 | 1.0000     |
| Clostridia Class                       | 5                              | 0.8594         | 1                 | 1.0000     |
| Family_XIII_UCG-001                    | 6                              | 0.8723         | 1                 | 1.0000     |
| Ruminococcaceae_UCG-010                | 9                              | 0.8724         | 1                 | 1.0000     |
| Blautia                                | 14                             | 0.8753         | 1                 | 1.0000     |
| Terrisporobacter                       | 6                              | 0.8990         | 1                 | 1.0000     |
| Allisonella                            | 8                              | 0.8990         | 1                 | 1.0000     |
| Rhodospirillales Order                 | 4                              | 0.9246         | 1                 | 1.0000     |
| Cloacibacillus                         | 4                              | 0.9246         | 1                 | 1.0000     |
| Sutterella                             | 8                              | 0.9360         | 1                 | 1.0000     |
| Coriobacteriales_Incertae_Sedis Family | 8                              | 0.9360         | 1                 | 1.0000     |
| Prevotellaceae Family                  | 2                              | 0.9510         | 1                 | 1.0000     |
| Enterorhabdus                          | 2                              | 0.9510         | 1                 | 1.0000     |
| Rikenellaceae_RC9_gut_group            | 2                              | 0.9510         | 1                 | 1.0000     |
| Methanosphaera                         | 2                              | 0.9510         | 1                 | 1.0000     |
| Mollicutes_RF39 Order                  | 2                              | 0.9510         | 1                 | 1.0000     |
| Eubacterium                            | 3                              | 0.9510         | 1                 | 1.0000     |
| Bacteroidia Class                      | 3                              | 0.9510         | 1                 | 1.0000     |
| GCA-900066755                          | 2                              | 0.9510         | 1                 | 1.0000     |
| Catenibacterium                        | 6                              | 0.9663         | 1                 | 1.0000     |
| Tyzzarella_4                           | 6                              | 0.9663         | 1                 | 1.0000     |
| Erysipelotrichaceae Family             | 10                             | 0.9686         | 1                 | 1.0000     |
| Lachnospiraceae_UCG-010                | 12                             | 0.9687         | 1                 | 1.0000     |
| Bacteria                               | 10                             | 0.9687         | 1                 | 1.0000     |

Colchicine Data Figure 4

| <b>Genus</b>            | <b>WK12 num samples &gt; 0</b> | <b>p.value</b> | <b>bonferroni</b> | <b>lfd</b> |
|-------------------------|--------------------------------|----------------|-------------------|------------|
| Blautia                 | 15                             | 1.0000         | 1                 | 1          |
| Burkholderiaceae Family | 3                              | 1.0000         | 1                 | 1          |
| DNF00809                | 3                              | 1.0000         | 1                 | 1          |
